# Supplementary material for: Prediction of RNA‐Binding Proteins by Voting Systems
Source: Hindawi journal article supplement (doi:10.1155/2011/506205), 2011-01-01
Supplement: f1 [file 506205.f1.zip]

Archive with 20 entries (20 files):
- testSet1.csv
- testSet10.csv
- testSet2.csv
- testSet3.csv
- testSet4.csv
- testSet5.csv
- testSet6.csv
- testSet7.csv
- testSet8.csv
- testSet9.csv
- trainSet1.csv
- trainSet10.csv
- trainSet2.csv
- trainSet3.csv
- trainSet4.csv
- trainSet5.csv
- trainSet6.csv
- trainSet7.csv
- trainSet8.csv
- trainSet9.csv
