# Supplementary material for: Prediction of RNA‐Binding Proteins by Voting Systems
Source: Hindawi journal article supplement (doi:10.1155/2011/506205), 2011-01-01
Supplement: f1 [file 506205.f1.zip › testSet1.csv]

v1	v2	v3	v4	v5	v6	v7	v8	v9	v10	v11	v12	v13	v14	v15	v16	v17	v18	v19	v20	v21	v22	v23	v24	v25	v26	v27	v28	v29	v30	v31	v32	v33	v34	v35	v36	v37	v38	v39	v40	v41	v42	v43	v44	v45	v46	v47	v48	v49	v50
0.398305	0.29661	0.305085	0.205128	0.273504	0.25641	0.016949	0.161017	0.432203	0.711864	0.991525	0.025424	0.322034	0.542373	0.822034	0.974576	0.008475	0.228814	0.449153	0.745763	1	0.313559	0.228814	0.457627	0.08547	0.068376	0	0.008475	0.262712	0.508475	0.754237	1	0.271186	0.313559	0.398305	0.491525	0.847458	0.025424	0.127119	0.59322	0.70339	0.957627	0.457627	0.324786	0.042373	0.29661	0.483051	0.779661	0.983051	0.305085
0.416382	0.262799	0.320819	0.19863	0.256849	0.164384	0.006826	0.317406	0.556314	0.761092	1	0.020478	0.191126	0.392491	0.648464	0.90785	0.003413	0.245734	0.491468	0.764505	0.993174	0.37884	0.228669	0.392491	0.075342	0.068493	0	0.003413	0.197952	0.477816	0.62116	1	0.013652	0.163823	0.395904	0.767918	0.945392	0.054608	0.34471	0.549488	0.825939	0.993174	0.559727	0.349315	0.013652	0.232082	0.464164	0.709898	0.993174	0.286689
0.244147	0.434783	0.32107	0.194631	0.201342	0.271812	0.006689	0.19398	0.411371	0.658863	0.989967	0.013378	0.250836	0.508361	0.782609	1	0.003344	0.277592	0.498328	0.725753	0.996656	0.428094	0.26087	0.311037	0.080537	0.04698	0.006711	0.003344	0.240803	0.538462	0.735786	1	0.113712	0.204013	0.424749	0.692308	0.819398	0.016722	0.347826	0.508361	0.889632	0.9699	0.555184	0.369128	0.010033	0.287625	0.491639	0.732441	0.996656	0.441472
0.34375	0.330357	0.325893	0.215247	0.282511	0.206278	0.017857	0.245536	0.477679	0.799107	1	0.008929	0.200893	0.513393	0.709821	0.995536	0.004464	0.254464	0.482143	0.705357	0.9375	0.459821	0.379464	0.160714	0.116592	0.06278	0.008969	0.004464	0.325893	0.629464	0.821429	1	0.022321	0.209821	0.424107	0.607143	0.857143	0.089286	0.125	0.272321	0.732143	0.924107	0.40625	0.430493	0.026786	0.25	0.4375	0.651786	0.9375	0.370536
0.365714	0.354286	0.28	0.224138	0.195402	0.224138	0.017143	0.188571	0.491429	0.777143	1	0.011429	0.285714	0.514286	0.76	0.988571	0.005714	0.245714	0.445714	0.657143	0.977143	0.382857	0.08	0.537143	0.034483	0.08046	0	0.005714	0.091429	0.474286	0.902857	1	0.411429	0.422857	0.445714	0.48	0.514286	0.12	0.262857	0.56	0.72	0.897143	0.485714	0.413793	0.04	0.268571	0.52	0.731429	0.977143	0.337143
0.584906	0.339623	0.075472	0.346154	0.134615	0.019231	0.037736	0.245283	0.528302	0.716981	1	0.018868	0.264151	0.490566	0.754717	0.962264	0.056604	0.056604	0.09434	0.226415	0.509434	0.849057	0.132075	0.018868	0.076923	0.038462	0	0.018868	0.339623	0.54717	0.754717	1	0.037736	0.037736	0.075472	0.169811	0.207547	0.792453	0.792453	0.792453	0.792453	0.792453	0.09434	0.192308	0.09434	0.09434	0.226415	0.433962	0.566038	0.433962
0.337025	0.356013	0.306962	0.240887	0.220285	0.202853	0.003165	0.251582	0.492089	0.724684	1	0.006329	0.21519	0.474684	0.78481	0.996835	0.001582	0.308544	0.518987	0.721519	0.985759	0.47943	0.045886	0.474684	0.019017	0.104596	0.009509	0.001582	0.126582	0.259494	0.612342	1	0.306962	0.503165	0.667722	0.963608	0.987342	0.006329	0.438291	0.620253	0.792722	0.949367	0.571203	0.393027	0.009494	0.264241	0.496835	0.716772	0.988924	0.387658
0.337553	0.383966	0.278481	0.258475	0.20339	0.233051	0.008439	0.189873	0.50211	0.78481	1	0.016878	0.257384	0.523207	0.772152	0.995781	0.004219	0.261603	0.485232	0.666667	0.915612	0.493671	0.308017	0.198312	0.097458	0.072034	0.012712	0.004219	0.312236	0.594937	0.805907	1	0.088608	0.257384	0.362869	0.518987	0.919831	0.033755	0.160338	0.544304	0.818565	0.924051	0.400844	0.389831	0.042194	0.227848	0.413502	0.620253	0.932489	0.42616
0.423729	0.262712	0.313559	0.196581	0.316239	0.196581	0.016949	0.211864	0.516949	0.720339	0.991525	0.042373	0.245763	0.457627	0.754237	0.974576	0.008475	0.237288	0.449153	0.745763	1	0.338983	0.220339	0.440678	0.08547	0.068376	0	0.008475	0.220339	0.533898	0.805085	1	0.228814	0.271186	0.355932	0.440678	0.847458	0.033898	0.135593	0.601695	0.711864	0.957627	0.423729	0.25641	0.127119	0.322034	0.474576	0.788136	0.983051	0.29661
0.335938	0.390625	0.273438	0.267717	0.15748	0.244094	0.023438	0.210938	0.398438	0.71875	0.992188	0.015625	0.21875	0.539062	0.773438	1	0.007812	0.28125	0.554688	0.734375	0.960938	0.242188	0.046875	0.710938	0.015748	0.07874	0	0.007812	0.054688	0.5625	0.703125	1	0.945312	0.945312	0.960938	0.96875	0.984375	0.0625	0.28125	0.460938	0.71875	0.914062	0.445312	0.456693	0.03125	0.328125	0.523438	0.742188	0.96875	0.375
0.321839	0.385878	0.292282	0.230263	0.185855	0.246711	0.00821	0.211823	0.425287	0.727422	1	0.004926	0.26601	0.52381	0.760263	0.990148	0.001642	0.28243	0.520525	0.73399	0.996716	0.612479	0.17734	0.210181	0.082237	0.069079	0	0.001642	0.275862	0.484401	0.773399	1	0.004926	0.254516	0.558292	0.740558	0.996716	0.027915	0.18555	0.464696	0.720854	0.850575	0.45156	0.365132	0.003284	0.298851	0.558292	0.816092	0.996716	0.367816
0.372007	0.3407	0.287293	0.236866	0.213825	0.2	0.002762	0.210866	0.462247	0.744936	1	0.001842	0.237569	0.48895	0.731123	0.999079	0.000921	0.334254	0.550645	0.775322	0.994475	0.441989	0.093002	0.465009	0.042396	0.086636	0.001843	0.000921	0.190608	0.394107	0.672192	1	0.005525	0.289134	0.384899	0.569061	0.95488	0.004604	0.361878	0.609576	0.78453	0.996317	0.476059	0.337327	0.005525	0.330571	0.541436	0.757827	0.994475	0.344383
0.367521	0.316239	0.316239	0.24339	0.232504	0.195179	0.002331	0.216006	0.483294	0.749029	0.993007	0.001554	0.227661	0.452991	0.71251	0.999223	0.000777	0.307692	0.556333	0.787102	1	0.477078	0.099456	0.423465	0.044323	0.081649	0.003888	0.000777	0.177933	0.401709	0.700078	1	0.027195	0.324786	0.540016	0.714064	0.995338	0.006216	0.346542	0.610723	0.836053	0.997669	0.503497	0.402799	0.003885	0.285936	0.531469	0.756022	0.998446	0.33411
0.335	0.335	0.33	0.231156	0.226131	0.221106	0.01	0.215	0.465	0.735	1	0.055	0.255	0.415	0.67	0.94	0.005	0.24	0.595	0.805	0.995	0.55	0.11	0.34	0.060302	0.070352	0	0.005	0.245	0.385	0.68	1	0.03	0.4	0.7	0.81	0.91	0.055	0.17	0.54	0.775	0.97	0.475	0.371859	0.035	0.335	0.525	0.77	0.97	0.305
0.385185	0.318519	0.296296	0.231343	0.201493	0.179104	0.02963	0.288889	0.496296	0.733333	0.97037	0.022222	0.222222	0.562963	0.888889	1	0.007407	0.251852	0.437037	0.651852	0.955556	0.459259	0.133333	0.407407	0.044776	0.089552	0	0.007407	0.207407	0.437037	0.881481	1	0.244444	0.266667	0.362963	0.392593	0.666667	0.059259	0.17037	0.525926	0.748148	0.851852	0.414815	0.328358	0.044444	0.348148	0.496296	0.666667	0.962963	0.340741
0.423729	0.378531	0.19774	0.335227	0.102273	0.1875	0.028249	0.231638	0.564972	0.841808	1	0.011299	0.214689	0.457627	0.689266	0.99435	0.00565	0.265537	0.435028	0.632768	0.943503	0.463277	0.259887	0.276836	0.073864	0.039773	0.017045	0.00565	0.112994	0.367232	0.553672	1	0.146893	0.265537	0.435028	0.717514	0.80226	0.220339	0.570621	0.644068	0.887006	0.960452	0.446328	0.306818	0.016949	0.271186	0.451977	0.694915	0.943503	0.367232
0.363636	0.290909	0.345455	0.259259	0.314815	0.222222	0.036364	0.272727	0.490909	0.745455	1	0.145455	0.254545	0.527273	0.690909	0.890909	0.018182	0.109091	0.418182	0.781818	0.963636	0.418182	0.236364	0.345455	0.092593	0.074074	0	0.109091	0.181818	0.472727	0.654545	1	0.018182	0.054545	0.563636	0.618182	0.981818	0.254545	0.309091	0.4	0.745455	0.836364	0.327273	0.444444	0.054545	0.290909	0.454545	0.8	0.963636	0.309091
0.396226	0.313208	0.290566	0.25	0.280303	0.170455	0.011321	0.218868	0.520755	0.732075	0.996226	0.018868	0.332075	0.618868	0.811321	1	0.003774	0.215094	0.4	0.611321	0.992453	0.573585	0.113208	0.313208	0.083333	0.090909	0	0.003774	0.226415	0.460377	0.739623	1	0.05283	0.09434	0.264151	0.445283	0.992453	0.022642	0.407547	0.592453	0.8	0.916981	0.366038	0.484848	0.015094	0.237736	0.45283	0.70566	0.992453	0.339623
0.320113	0.385269	0.294618	0.221591	0.176136	0.213068	0.028329	0.291785	0.583569	0.818697	0.997167	0.005666	0.172805	0.419263	0.651558	1	0.002833	0.305949	0.529745	0.74221	0.983003	0.512748	0.130312	0.356941	0.053977	0.059659	0.002841	0.002833	0.161473	0.416431	0.72238	1	0.045326	0.424929	0.490085	0.617564	0.745042	0.008499	0.300283	0.563739	0.827195	0.932011	0.524079	0.340909	0.011331	0.226629	0.481586	0.691218	0.983003	0.405099
0.369863	0.332192	0.297945	0.250859	0.209622	0.216495	0.010274	0.222603	0.520548	0.760274	0.993151	0.006849	0.318493	0.486301	0.719178	0.996575	0.003425	0.215753	0.476027	0.732877	1	0.30137	0.089041	0.609589	0.030928	0.079038	0.003436	0.003425	0.178082	0.506849	0.770548	1	0.010274	0.027397	0.078767	0.106164	0.174658	0.143836	0.349315	0.547945	0.75	0.962329	0.506849	0.357388	0.013699	0.267123	0.493151	0.722603	0.952055	0.291096
0.275552	0.399862	0.324586	0.212163	0.188666	0.25501	0.004834	0.277624	0.517956	0.751381	0.994475	0.001381	0.242403	0.481354	0.723757	0.998619	0.000691	0.226519	0.506215	0.774862	1	0.54558	0.349448	0.104972	0.115411	0.036628	0.00622	0.000691	0.245166	0.473066	0.700276	1	0.014503	0.223066	0.486188	0.766575	0.935773	0.002072	0.361878	0.731354	0.955801	0.998619	0.602901	0.304077	0.002072	0.23895	0.5	0.756906	0.997928	0.412293
0.421687	0.212851	0.365462	0.185484	0.310484	0.177419	0.02008	0.269076	0.550201	0.767068	1	0.012048	0.196787	0.461847	0.694779	0.995984	0.004016	0.232932	0.453815	0.738956	0.97992	0.457831	0.309237	0.232932	0.133065	0.052419	0.004032	0.004016	0.261044	0.461847	0.714859	1	0.13253	0.285141	0.473896	0.726908	0.915663	0.02008	0.092369	0.526104	0.791165	0.967871	0.506024	0.419355	0.036145	0.305221	0.493976	0.738956	0.967871	0.240964
0.393777	0.378755	0.227468	0.276047	0.167562	0.166488	0.002146	0.22103	0.453863	0.759657	1	0.006438	0.265021	0.498927	0.762876	0.995708	0.001073	0.362661	0.531116	0.712446	0.993562	0.533262	0.100858	0.36588	0.038668	0.079484	0.004296	0.001073	0.201717	0.378755	0.727468	1	0.045064	0.403433	0.555794	0.684549	0.767167	0.01073	0.374464	0.567597	0.804721	0.966738	0.407725	0.322234	0.022532	0.370172	0.519313	0.712446	0.993562	0.4603
0.375	0.367857	0.257143	0.275492	0.198569	0.168157	0.010714	0.225	0.492857	0.783929	1	0.003571	0.264286	0.503571	0.746429	0.998214	0.001786	0.25	0.491071	0.710714	0.996429	0.535714	0.146429	0.317857	0.062612	0.069767	0.005367	0.001786	0.219643	0.507143	0.751786	1	0.044643	0.401786	0.475	0.605357	0.991071	0.023214	0.257143	0.432143	0.785714	0.985714	0.441071	0.36136	0.007143	0.235714	0.516071	0.694643	0.996429	0.382143
0.328244	0.332061	0.339695	0.187739	0.214559	0.226054	0.007634	0.244275	0.515267	0.767176	1	0.015267	0.206107	0.431298	0.71374	0.98855	0.003817	0.263359	0.48855	0.721374	0.996183	0.381679	0.187023	0.431298	0.05364	0.099617	0	0.003817	0.20229	0.423664	0.683206	1	0.125954	0.301527	0.39313	0.614504	0.71374	0.022901	0.255725	0.515267	0.832061	0.992366	0.553435	0.40613	0.030534	0.225191	0.442748	0.641221	0.98855	0.335878
0.431373	0.313725	0.254902	0.257426	0.257426	0.128713	0.019608	0.22549	0.45098	0.803922	0.990196	0.039216	0.323529	0.568627	0.696078	1	0.009804	0.137255	0.470588	0.77451	0.95098	0.264706	0.460784	0.27451	0.079208	0.039604	0	0.009804	0.147059	0.784314	0.931373	1	0.019608	0.362745	0.480392	0.617647	0.901961	0.156863	0.215686	0.284314	0.705882	0.77451	0.470588	0.39604	0.039216	0.215686	0.480392	0.696078	0.892157	0.323529
0.333503	0.322318	0.344179	0.20295	0.232452	0.231943	0.002034	0.23335	0.474835	0.738688	0.998475	0.001017	0.252161	0.516014	0.748856	1	0.000508	0.262837	0.513981	0.75089	0.999492	0.404677	0.149975	0.445348	0.055443	0.085961	0.003561	0.000508	0.222166	0.512456	0.759532	1	0.002542	0.316726	0.551093	0.770208	0.999492	0.005592	0.259786	0.459583	0.723945	0.930859	0.563803	0.375381	0.002542	0.279105	0.509405	0.744281	0.999492	0.341129
0.352181	0.318255	0.329564	0.223301	0.221683	0.197411	0.008078	0.232633	0.516963	0.77706	1	0.006462	0.197092	0.439418	0.736672	0.996769	0.001616	0.311793	0.53958	0.731826	0.983845	0.49273	0.163166	0.344103	0.063107	0.079288	0.004854	0.001616	0.159935	0.336026	0.647819	1	0.009693	0.308562	0.568659	0.728595	0.886914	0.077544	0.415186	0.599354	0.817447	0.995153	0.508885	0.355987	0.009693	0.345719	0.523425	0.731826	0.988691	0.360258
0.371981	0.277778	0.350242	0.174334	0.268765	0.227603	0.007246	0.248792	0.504831	0.777778	1	0.004831	0.21256	0.495169	0.710145	0.997585	0.002415	0.253623	0.485507	0.7343	0.995169	0.342995	0.13285	0.524155	0.067797	0.11138	0.004843	0.002415	0.21256	0.543478	0.818841	1	0.086957	0.176329	0.516908	0.92029	0.997585	0.007246	0.26087	0.463768	0.71256	0.951691	0.572464	0.387409	0.014493	0.236715	0.454106	0.664251	0.995169	0.299517
0.41875	0.34375	0.2375	0.238994	0.220126	0.138365	0.05	0.25625	0.4875	0.75625	1	0.0125	0.225	0.63125	0.85625	0.98125	0.00625	0.15625	0.39375	0.56875	0.7625	0.69375	0.0875	0.21875	0.081761	0.069182	0.006289	0.00625	0.24375	0.50625	0.825	1	0.15	0.1625	0.43125	0.55625	0.625	0.10625	0.19375	0.3875	0.7	0.75625	0.3375	0.339623	0.025	0.18125	0.4125	0.58125	0.90625	0.34375
0.359712	0.359712	0.280576	0.217391	0.173913	0.224638	0.021583	0.338129	0.546763	0.741007	0.971223	0.014388	0.194245	0.410072	0.784173	1	0.007194	0.23741	0.467626	0.697842	0.992806	0.47482	0.129496	0.395683	0.057971	0.072464	0	0.007194	0.208633	0.553957	0.863309	1	0.230216	0.251799	0.345324	0.618705	0.913669	0.057554	0.165468	0.496403	0.748201	0.848921	0.417266	0.362319	0.028777	0.258993	0.467626	0.640288	0.964029	0.338129
0.318912	0.346106	0.334981	0.209158	0.226485	0.237624	0.002472	0.254635	0.50309	0.746601	0.998764	0.004944	0.245983	0.487021	0.736712	1	0.001236	0.228677	0.494438	0.751545	0.997528	0.469716	0.236094	0.29419	0.09901	0.054455	0.002475	0.001236	0.229913	0.484549	0.744129	1	0.038319	0.197775	0.415328	0.803461	0.997528	0.00618	0.320148	0.537701	0.708282	0.991347	0.552534	0.398515	0.003708	0.255871	0.469716	0.735476	0.997528	0.385661
0.342268	0.371134	0.286598	0.245868	0.200413	0.216942	0.004124	0.224742	0.461856	0.709278	0.995876	0.014433	0.251546	0.492784	0.783505	0.989691	0.002062	0.274227	0.515464	0.764948	1	0.391753	0.098969	0.509278	0.053719	0.11157	0.012397	0.002062	0.245361	0.51134	0.795876	1	0.008247	0.294845	0.441237	0.82268	0.997938	0.020619	0.235052	0.492784	0.65567	0.950515	0.529897	0.433884	0.010309	0.286598	0.529897	0.781443	0.993814	0.391753
0.339515	0.378031	0.282454	0.25	0.207143	0.202857	0.012839	0.286733	0.510699	0.758916	0.99572	0.002853	0.18117	0.456491	0.724679	1	0.001427	0.300999	0.504993	0.74465	0.998573	0.60485	0.151213	0.243937	0.072857	0.064286	0.001429	0.001427	0.172611	0.413695	0.723252	1	0.108417	0.368046	0.550642	0.850214	0.950071	0.192582	0.356633	0.523538	0.78602	0.998573	0.467903	0.411429	0.008559	0.299572	0.526391	0.764622	0.994294	0.398003
0.353695	0.333005	0.3133	0.218935	0.229783	0.216963	0.00197	0.224631	0.493596	0.744828	1	0.011823	0.231527	0.454187	0.725123	0.99803	0.000985	0.28867	0.544828	0.776355	0.997044	0.44335	0.13202	0.424631	0.059172	0.086785	0.005917	0.000985	0.155665	0.359606	0.744828	1	0.025616	0.24335	0.545813	0.848276	0.990148	0.00197	0.400985	0.565517	0.712315	0.996059	0.504433	0.378698	0.003941	0.29064	0.539901	0.781281	0.997044	0.330049
0.454545	0.363636	0.181818	0.367816	0.172414	0.114943	0.034091	0.227273	0.454545	0.795455	1	0.022727	0.272727	0.534091	0.704545	0.988636	0.011364	0.318182	0.443182	0.75	0.943182	0.170455	0.011364	0.818182	0.022989	0.068966	0	0.011364	0.034091	0.488636	0.772727	1	0.761364	0.761364	0.761364	0.761364	0.761364	0.056818	0.25	0.454545	0.693182	0.977273	0.340909	0.45977	0.079545	0.352273	0.579545	0.75	0.943182	0.386364
0.328571	0.414286	0.257143	0.323741	0.165468	0.201439	0.021429	0.221429	0.428571	0.728571	0.992857	0.014286	0.264286	0.542857	0.821429	1	0.007143	0.228571	0.464286	0.635714	0.957143	0.4	0.228571	0.371429	0.064748	0.079137	0.007194	0.007143	0.314286	0.6	0.864286	1	0.042857	0.092857	0.371429	0.464286	0.678571	0.135714	0.221429	0.571429	0.757143	0.971429	0.421429	0.388489	0.028571	0.207143	0.45	0.621429	0.964286	0.407143
0.393832	0.362487	0.24368	0.276682	0.186141	0.190693	0.001517	0.276036	0.538928	0.778564	1	0.001011	0.216886	0.444894	0.716886	0.999494	0.000506	0.258847	0.508595	0.748736	0.9909	0.623357	0.141557	0.235086	0.065756	0.073849	0.011128	0.000506	0.212336	0.470172	0.735086	1	0.035389	0.362993	0.502528	0.77907	0.979272	0.042467	0.33367	0.538423	0.786148	0.997978	0.350354	0.363177	0.003033	0.217897	0.479272	0.72093	0.992417	0.394338
0.375	0.305556	0.319444	0.181818	0.286713	0.237762	0.020833	0.222222	0.444444	0.708333	1	0.013889	0.208333	0.513889	0.791667	0.986111	0.006944	0.291667	0.534722	0.729167	0.979167	0.25	0	0.75	0	0.097902	0	0.006944	0.0625	0.326389	0.722222	1	0	0	0	0	0	0.083333	0.291667	0.506944	0.763889	0.979167	0.520833	0.377622	0.090278	0.326389	0.583333	0.756944	0.979167	0.340278
0.355694	0.297972	0.346334	0.173437	0.239063	0.23125	0.0078	0.24337	0.471139	0.769111	0.99532	0.00468	0.25117	0.519501	0.703588	1	0.00156	0.24805	0.50858	0.764431	0.99844	0.308892	0.102964	0.588144	0.0375	0.084375	0.003125	0.00156	0.266771	0.541342	0.795632	1	0.082683	0.232449	0.687988	0.865835	0.926677	0.00624	0.25273	0.444618	0.664587	0.9922	0.51014	0.415625	0.00312	0.25741	0.514821	0.74103	0.99064	0.318253
0.398148	0.25	0.351852	0.186916	0.271028	0.242991	0.018519	0.203704	0.518519	0.768519	1	0.074074	0.185185	0.407407	0.657407	0.925926	0.009259	0.259259	0.490741	0.740741	0.990741	0.361111	0.194444	0.444444	0.074766	0.056075	0	0.009259	0.175926	0.324074	0.777778	1	0.055556	0.268519	0.37037	0.416667	0.759259	0.101852	0.462963	0.574074	0.842593	0.953704	0.481481	0.373832	0.064815	0.305556	0.5	0.722222	0.962963	0.231481
0.295172	0.423448	0.281379	0.251381	0.189227	0.226519	0.006897	0.22069	0.502069	0.754483	1	0.002759	0.263448	0.504828	0.765517	0.994483	0.001379	0.24	0.474483	0.715862	0.998621	0.394483	0.17931	0.426207	0.087017	0.075967	0.006906	0.001379	0.246897	0.528276	0.827586	1	0.026207	0.195862	0.368276	0.871724	0.983448	0.048276	0.296552	0.521379	0.678621	0.924138	0.515862	0.361878	0.009655	0.25931	0.468966	0.691034	0.998621	0.431724
0.323232	0.358586	0.318182	0.218274	0.218274	0.233503	0.040404	0.353535	0.585859	0.79798	0.964646	0.010101	0.151515	0.424242	0.686869	1	0.005051	0.232323	0.454545	0.707071	0.979798	0.510101	0.348485	0.141414	0.126904	0.045685	0.005076	0.005051	0.176768	0.429293	0.717172	1	0.237374	0.419192	0.555556	0.757576	0.984848	0.015152	0.045455	0.287879	0.89899	0.959596	0.388889	0.385787	0.020202	0.252525	0.520202	0.691919	0.979798	0.363636
0.265152	0.390152	0.344697	0.235741	0.174905	0.315589	0.018939	0.227273	0.560606	0.82197	0.992424	0.007576	0.295455	0.511364	0.80303	1	0.003788	0.204545	0.412879	0.628788	0.981061	0.496212	0.348485	0.155303	0.102662	0.064639	0.003802	0.003788	0.314394	0.579545	0.863636	1	0.011364	0.246212	0.409091	0.602273	0.962121	0.05303	0.094697	0.511364	0.768939	0.82197	0.481061	0.418251	0.011364	0.261364	0.454545	0.625	0.981061	0.412879
0.327273	0.42303	0.249697	0.275485	0.163835	0.206311	0.002424	0.241212	0.470303	0.779394	0.997576	0.006061	0.247273	0.558788	0.76	1	0.001212	0.270303	0.446061	0.681212	0.998788	0.486061	0.13697	0.37697	0.050971	0.080097	0.002427	0.001212	0.139394	0.408485	0.689697	1	0.007273	0.309091	0.473939	0.606061	0.718788	0.110303	0.344242	0.642424	0.835152	0.995152	0.442424	0.288835	0.006061	0.284848	0.493333	0.687273	0.996364	0.458182
0.322353	0.409412	0.268235	0.231132	0.188679	0.233491	0.018824	0.228235	0.435294	0.651765	0.990588	0.004706	0.329412	0.595294	0.837647	1	0.002353	0.188235	0.454118	0.687059	0.976471	0.644706	0.129412	0.225882	0.049528	0.063679	0.007075	0.002353	0.331765	0.569412	0.830588	1	0.051765	0.112941	0.390588	0.621176	0.710588	0.056471	0.228235	0.317647	0.576471	0.974118	0.529412	0.34434	0.023529	0.263529	0.583529	0.825882	0.985882	0.444706
0.336283	0.323009	0.340708	0.195556	0.24	0.217778	0.00885	0.221239	0.575221	0.840708	0.986726	0.022124	0.247788	0.486726	0.712389	1	0.004425	0.243363	0.460177	0.681416	0.995575	0.438053	0.225664	0.336283	0.093333	0.066667	0.013333	0.004425	0.181416	0.433628	0.668142	1	0.026549	0.115044	0.393805	0.597345	0.99115	0.154867	0.345133	0.623894	0.849558	0.986726	0.561947	0.328889	0.017699	0.292035	0.482301	0.668142	0.99115	0.371681
0.34375	0.320312	0.335938	0.267717	0.188976	0.251969	0.023438	0.242188	0.460938	0.757812	0.976562	0.015625	0.148438	0.445312	0.703125	0.953125	0.007812	0.273438	0.539062	0.773438	1	0.390625	0.140625	0.46875	0.07874	0.110236	0	0.007812	0.101562	0.476562	0.726562	1	0.273438	0.414062	0.625	0.789062	0.835938	0.03125	0.226562	0.5	0.867188	0.984375	0.523438	0.425197	0.046875	0.335938	0.53125	0.742188	0.984375	0.351562
0.310606	0.431818	0.257576	0.274809	0.183206	0.19084	0.037879	0.257576	0.568182	0.727273	0.984848	0.015152	0.280303	0.522727	0.772727	1	0.007576	0.189394	0.340909	0.583333	0.962121	0.507576	0.492424	0	0.152672	0	0	0.007576	0.363636	0.636364	0.856061	1	0.037879	0.189394	0.356061	0.598485	0.969697	0	0	0	0	0	0.340909	0.381679	0.045455	0.204545	0.416667	0.606061	0.962121	0.431818
0.373626	0.344041	0.282333	0.236041	0.205584	0.193739	0.002536	0.202029	0.431107	0.716822	0.999155	0.001691	0.258664	0.509721	0.75317	0.995773	0.000845	0.344041	0.543533	0.764159	1	0.415046	0.114117	0.470837	0.038917	0.093063	0.003384	0.000845	0.209637	0.46492	0.726965	1	0.034658	0.474218	0.621302	0.897718	0.989856	0.003381	0.248521	0.482671	0.760778	0.993238	0.457312	0.328257	0.003381	0.393068	0.596788	0.795435	0.997464	0.373626
0.351211	0.356401	0.292388	0.2513	0.187175	0.202773	0.00346	0.193772	0.456747	0.721453	1	0.019031	0.276817	0.49654	0.757785	0.991349	0.00173	0.283737	0.527682	0.766436	0.99827	0.432526	0.16782	0.399654	0.062392	0.07279	0.003466	0.00173	0.207612	0.423875	0.717993	1	0.00692	0.415225	0.645329	0.771626	0.99654	0.034602	0.259516	0.487889	0.749135	0.970588	0.531142	0.315425	0.00519	0.32526	0.508651	0.738754	0.99827	0.382353
0.326336	0.387405	0.28626	0.23327	0.160612	0.229446	0.017176	0.278626	0.562977	0.839695	0.992366	0.003817	0.198473	0.492366	0.73855	0.998092	0.001908	0.253817	0.444656	0.650763	1	0.454198	0.076336	0.469466	0.024857	0.07457	0.005736	0.001908	0.259542	0.620229	0.841603	1	0.05916	0.175573	0.206107	0.59542	0.803435	0.005725	0.312977	0.482824	0.650763	0.98855	0.526718	0.305927	0.007634	0.242366	0.484733	0.667939	0.996183	0.417939
0.385827	0.254593	0.35958	0.184211	0.305263	0.194737	0.005249	0.199475	0.493438	0.748031	0.994751	0.018373	0.312336	0.496063	0.771654	0.965879	0.002625	0.233596	0.480315	0.716535	1	0.367454	0.24147	0.391076	0.073684	0.073684	0	0.002625	0.330709	0.553806	0.83727	1	0.007874	0.146982	0.39895	0.511811	0.860892	0.065617	0.265092	0.598425	0.748031	0.989501	0.606299	0.421053	0.010499	0.270341	0.519685	0.740157	0.992126	0.275591
0.356234	0.287532	0.356234	0.201531	0.267857	0.216837	0.007634	0.221374	0.468193	0.722646	0.987277	0.005089	0.290076	0.549618	0.804071	0.994911	0.002545	0.239186	0.470738	0.748092	1	0.358779	0.139949	0.501272	0.066327	0.071429	0.010204	0.002545	0.147583	0.384224	0.597964	1	0.058524	0.211196	0.394402	0.572519	0.900763	0.012723	0.29771	0.659033	0.821883	0.984733	0.559796	0.433673	0.010178	0.249364	0.503817	0.732824	0.979644	0.292621
0.3	0.413333	0.286667	0.22964	0.192256	0.221629	0.005333	0.250667	0.510667	0.78	0.998667	0.006667	0.228	0.530667	0.721333	0.997333	0.001333	0.265333	0.445333	0.753333	1	0.632	0.184	0.184	0.093458	0.058745	0.00534	0.001333	0.221333	0.528	0.730667	1	0.004	0.297333	0.446667	0.797333	0.985333	0.033333	0.286667	0.458667	0.816	0.981333	0.550667	0.368491	0.012	0.313333	0.550667	0.748	0.996	0.442667
0.318072	0.433735	0.248193	0.2657	0.169082	0.214976	0.004819	0.214458	0.481928	0.725301	0.990361	0.007229	0.260241	0.515663	0.785542	1	0.00241	0.26988	0.520482	0.718072	0.992771	0.583133	0.151807	0.26506	0.067633	0.082126	0	0.00241	0.286747	0.549398	0.8	1	0.115663	0.298795	0.46988	0.648193	0.763855	0.007229	0.091566	0.486747	0.718072	0.987952	0.46506	0.381643	0.007229	0.296386	0.583133	0.792771	0.995181	0.428916
0.331169	0.383117	0.285714	0.30719	0.20915	0.24183	0.038961	0.253247	0.506494	0.75974	1	0.012987	0.266234	0.551948	0.772727	0.987013	0.006494	0.168831	0.402597	0.655844	0.993506	0.454545	0.142857	0.402597	0.091503	0.078431	0.013072	0.006494	0.233766	0.584416	0.772727	1	0.012987	0.038961	0.337662	0.727273	0.909091	0.097403	0.285714	0.435065	0.636364	0.987013	0.474026	0.398693	0.006494	0.207792	0.428571	0.714286	0.993506	0.409091
0.447761	0.223881	0.328358	0.203008	0.240602	0.157895	0.052239	0.298507	0.514925	0.828358	1	0.044776	0.201493	0.5	0.671642	0.977612	0.007463	0.231343	0.447761	0.69403	0.985075	0.335821	0.171642	0.492537	0.075188	0.090226	0	0.007463	0.216418	0.470149	0.731343	1	0.022388	0.238806	0.432836	0.656716	0.716418	0.052239	0.298507	0.529851	0.80597	0.985075	0.38806	0.421053	0.029851	0.253731	0.522388	0.69403	0.977612	0.216418
0.342672	0.418103	0.239224	0.306695	0.181425	0.168467	0.00431	0.200431	0.463362	0.719828	0.99569	0.006466	0.273707	0.579741	0.765086	0.997845	0.002155	0.232759	0.420259	0.726293	1	0.661638	0.157328	0.181034	0.069114	0.034557	0	0.002155	0.280172	0.545259	0.730603	1	0.017241	0.165948	0.344828	0.838362	0.943966	0.06681	0.224138	0.4375	0.885776	0.982759	0.493534	0.362851	0.021552	0.338362	0.549569	0.726293	0.980603	0.459052
0.414894	0.212766	0.37234	0.193548	0.354839	0.150538	0.031915	0.159574	0.478723	0.723404	1	0.170213	0.265957	0.489362	0.755319	0.957447	0.010638	0.212766	0.468085	0.744681	0.93617	0.425532	0.574468	0	0.172043	0	0	0.010638	0.234043	0.5	0.744681	1	0.031915	0.265957	0.468085	0.659574	0.93617	0	0	0	0	0	0.425532	0.387097	0.042553	0.297872	0.542553	0.840426	0.946809	0.191489
0.304286	0.492857	0.202857	0.263233	0.134478	0.180258	0.005714	0.288571	0.558571	0.781429	0.998571	0.004286	0.21	0.381429	0.618571	0.994286	0.001429	0.39	0.68	0.827143	1	0.728571	0.065714	0.205714	0.02289	0.048641	0.005722	0.001429	0.181429	0.364286	0.545714	1	0.651429	0.724286	0.812857	0.872857	0.924286	0.554286	0.634286	0.744286	0.911429	0.995714	0.277143	0.228898	0.002857	0.63	0.74	0.864286	0.995714	0.471429
0.288413	0.394207	0.31738	0.213115	0.17024	0.282472	0.002519	0.29597	0.559194	0.787154	0.998741	0.005038	0.244332	0.482368	0.72796	1	0.001259	0.230479	0.474811	0.739295	0.997481	0.459698	0.244332	0.29597	0.099622	0.054224	0.003783	0.001259	0.209068	0.462217	0.746851	1	0.039043	0.206549	0.423174	0.788413	0.955919	0.006297	0.324937	0.575567	0.700252	0.988665	0.56801	0.398487	0.003778	0.260705	0.478589	0.734257	0.997481	0.384131
0.262948	0.430279	0.306773	0.205589	0.165669	0.269461	0.00996	0.260956	0.569721	0.762948	0.992032	0.003984	0.233068	0.448207	0.760956	0.998008	0.001992	0.272908	0.523904	0.723108	1	0.464143	0.053785	0.482072	0.031936	0.087824	0	0.001992	0.223108	0.50996	0.826693	1	0.005976	0.103586	0.207171	0.958167	0.978088	0.031873	0.330677	0.498008	0.667331	0.918327	0.507968	0.359281	0.005976	0.298805	0.494024	0.669323	0.99004	0.444223
0.364865	0.324324	0.310811	0.217687	0.238095	0.258503	0.040541	0.283784	0.533784	0.72973	1	0.02027	0.243243	0.459459	0.831081	0.993243	0.006757	0.175676	0.452703	0.662162	0.972973	0.432432	0.175676	0.391892	0.054422	0.068027	0	0.006757	0.358108	0.77027	0.878378	1	0.128378	0.162162	0.222973	0.317568	0.972973	0.033784	0.385135	0.533784	0.655405	0.756757	0.493243	0.408163	0.027027	0.162162	0.344595	0.621622	0.912162	0.324324
0.331126	0.377483	0.291391	0.229236	0.229236	0.196013	0.013245	0.235099	0.47351	0.738411	0.996689	0.006623	0.261589	0.536424	0.811258	0.986755	0.003311	0.241722	0.460265	0.675497	1	0.453642	0.162252	0.384106	0.046512	0.07309	0	0.003311	0.258278	0.509934	0.837748	1	0.122517	0.274834	0.354305	0.562914	0.649007	0.033113	0.241722	0.486755	0.761589	0.903974	0.559603	0.41196	0.019868	0.231788	0.470199	0.705298	0.986755	0.427152
0.435252	0.28777	0.276978	0.227437	0.245487	0.176895	0.010791	0.266187	0.543165	0.802158	1	0.007194	0.244604	0.47482	0.71223	0.978417	0.003597	0.219424	0.438849	0.726619	0.996403	0.543165	0.147482	0.309353	0.057762	0.086643	0.00722	0.003597	0.179856	0.489209	0.76259	1	0.151079	0.255396	0.316547	0.726619	0.902878	0.010791	0.338129	0.557554	0.661871	0.992806	0.284173	0.353791	0.039568	0.241007	0.370504	0.607914	0.985612	0.316547
0.357143	0.337662	0.305195	0.313725	0.189542	0.20915	0.051948	0.318182	0.545455	0.818182	1	0.012987	0.175325	0.376623	0.694805	0.974026	0.006494	0.266234	0.454545	0.720779	0.993506	0.448052	0.097403	0.454545	0.039216	0.091503	0	0.006494	0.116883	0.324675	0.681818	1	0.123377	0.266234	0.292208	0.396104	0.422078	0.051948	0.5	0.623377	0.766234	0.915584	0.454545	0.352941	0.032468	0.285714	0.474026	0.720779	0.935065	0.331169
0.338983	0.345763	0.315254	0.221088	0.183673	0.248299	0.020339	0.257627	0.518644	0.779661	1	0.00678	0.213559	0.481356	0.701695	0.99322	0.00339	0.267797	0.491525	0.732203	0.983051	0.386441	0.166102	0.447458	0.047619	0.108844	0	0.00339	0.189831	0.464407	0.701695	1	0.159322	0.311864	0.4	0.59661	0.684746	0.013559	0.257627	0.505085	0.80339	0.979661	0.535593	0.408163	0.023729	0.240678	0.454237	0.657627	0.983051	0.349153
0.353333	0.295556	0.351111	0.207127	0.25167	0.207127	0.006667	0.217778	0.475556	0.755556	0.971111	0.008889	0.3	0.522222	0.76	0.997778	0.002222	0.222222	0.486667	0.728889	1	0.351111	0.08	0.568889	0.028953	0.100223	0.002227	0.002222	0.251111	0.533333	0.784444	1	0.222222	0.295556	0.477778	0.544444	0.626667	0.004444	0.184444	0.504444	0.755556	0.96	0.54	0.4098	0.004444	0.264444	0.488889	0.677778	0.995556	0.333333
0.283753	0.487414	0.228833	0.243119	0.133028	0.213303	0.006865	0.228833	0.430206	0.677346	0.997712	0.004577	0.235698	0.553776	0.764302	1	0.002288	0.299771	0.498856	0.748284	0.961098	0.702517	0.141876	0.155606	0.057339	0.048165	0.002294	0.002288	0.281465	0.610984	0.789474	1	0.032037	0.210526	0.304348	0.421053	0.963387	0.048055	0.270023	0.437071	0.521739	0.938215	0.585812	0.330275	0.011442	0.322654	0.592677	0.750572	0.988558	0.462243
0.395105	0.347902	0.256993	0.276708	0.194396	0.206655	0.036713	0.211538	0.38986	0.706294	1	0.003497	0.269231	0.538462	0.77972	0.998252	0.001748	0.323427	0.554196	0.76049	0.996503	0.174825	0.054196	0.770979	0.019264	0.057793	0.005254	0.001748	0.512238	0.711538	0.840909	1	0.45979	0.486014	0.536713	0.91958	0.986014	0.006993	0.202797	0.398601	0.692308	0.996503	0.454545	0.392294	0.005245	0.403846	0.606643	0.800699	0.993007	0.367133
0.382488	0.366359	0.251152	0.258661	0.17321	0.184758	0.009217	0.278802	0.52765	0.806452	1	0.004608	0.274194	0.518433	0.705069	0.988479	0.002304	0.184332	0.394009	0.732719	0.981567	0.709677	0.16129	0.129032	0.060046	0.032333	0	0.002304	0.352535	0.529954	0.709677	1	0.105991	0.221198	0.292627	0.797235	0.884793	0.006912	0.059908	0.145161	0.767281	0.85023	0.297235	0.290993	0.006912	0.152074	0.274194	0.732719	0.981567	0.384793
0.441441	0.252252	0.306306	0.263636	0.290909	0.172727	0.018018	0.288288	0.531532	0.756757	1	0.045045	0.189189	0.378378	0.702703	0.927928	0.009009	0.234234	0.495495	0.72973	0.972973	0.432432	0.297297	0.27027	0.118182	0.063636	0.009091	0.009009	0.27027	0.630631	0.774775	1	0.036036	0.333333	0.603604	0.801802	0.963964	0.081081	0.135135	0.261261	0.45045	0.927928	0.396396	0.418182	0.036036	0.189189	0.45045	0.783784	0.972973	0.288288
0.376569	0.348675	0.274756	0.273743	0.230447	0.189944	0.004184	0.264993	0.514644	0.764296	1	0.002789	0.214784	0.478382	0.740586	0.995816	0.001395	0.277545	0.51046	0.743375	0.998605	0.401674	0.174338	0.423989	0.081006	0.081006	0.005587	0.001395	0.276151	0.503487	0.828452	1	0.015342	0.185495	0.333333	0.873082	0.981869	0.037657	0.285914	0.55788	0.700139	0.958159	0.518828	0.385475	0.016736	0.25523	0.475593	0.698745	0.998605	0.405858
0.348637	0.317073	0.33429	0.218952	0.24336	0.212491	0.004304	0.286227	0.531564	0.761119	0.998565	0.001435	0.193687	0.446915	0.736729	1	0.000717	0.256815	0.498565	0.745337	0.996413	0.275466	0.035868	0.688666	0.015793	0.097631	0.007179	0.000717	0.250359	0.45911	0.719512	1	0.014347	0.14132	0.463415	0.591822	0.763989	0.001435	0.257532	0.522956	0.794835	0.997131	0.543042	0.417803	0.002869	0.232425	0.476327	0.745337	0.996413	0.33142
0.282051	0.389744	0.328205	0.21134	0.201031	0.257732	0.030769	0.307692	0.558974	0.764103	0.994872	0.010256	0.179487	0.425641	0.717949	1	0.005128	0.271795	0.476923	0.774359	0.989744	0.507692	0.4	0.092308	0.139175	0.036082	0.005155	0.005128	0.230769	0.482051	0.717949	1	0.035897	0.210256	0.425641	0.733333	0.933333	0.538462	0.589744	0.615385	0.953846	0.984615	0.512821	0.350515	0.025641	0.25641	0.45641	0.728205	0.989744	0.394872
0.343023	0.488372	0.168605	0.303207	0.139942	0.107872	0.008721	0.203488	0.436047	0.630814	0.994186	0.005814	0.284884	0.659884	0.822674	1	0.002907	0.247093	0.415698	0.534884	0.947674	0.712209	0.168605	0.119186	0.061224	0.03207	0.002915	0.002907	0.194767	0.642442	0.819767	1	0.165698	0.27907	0.375	0.517442	0.613372	0.162791	0.223837	0.331395	0.459302	0.630814	0.514535	0.268222	0.046512	0.40407	0.697674	0.825581	0.994186	0.488372
0.339869	0.48366	0.176471	0.311475	0.147541	0.137705	0.055556	0.316993	0.470588	0.761438	0.973856	0.006536	0.153595	0.434641	0.748366	1	0.003268	0.398693	0.575163	0.718954	0.986928	0.699346	0.094771	0.205882	0.045902	0.039344	0	0.003268	0.205882	0.490196	0.816993	1	0.323529	0.578431	0.666667	0.718954	0.957516	0.006536	0.395425	0.447712	0.614379	0.75817	0.415033	0.334426	0.052288	0.199346	0.624183	0.862745	0.993464	0.477124
0.408333	0.233333	0.358333	0.168067	0.285714	0.084034	0.016667	0.291667	0.541667	0.775	0.958333	0.025	0.208333	0.4	0.725	0.975	0.008333	0.233333	0.516667	0.708333	1	0.375	0.266667	0.358333	0.10084	0.084034	0.016807	0.008333	0.333333	0.466667	0.808333	1	0.033333	0.291667	0.416667	0.533333	0.991667	0.125	0.2	0.583333	0.7	0.9	0.45	0.403361	0.033333	0.208333	0.483333	0.7	0.991667	0.233333
0.403409	0.329545	0.267045	0.302857	0.171429	0.2	0.017045	0.204545	0.522727	0.806818	1	0.011364	0.170455	0.448864	0.676136	0.977273	0.005682	0.306818	0.5	0.744318	0.982955	0.414773	0.261364	0.323864	0.074286	0.074286	0.017143	0.005682	0.159091	0.397727	0.573864	1	0.176136	0.295455	0.465909	0.75	0.840909	0.017045	0.267045	0.642045	0.903409	0.988636	0.403409	0.297143	0.176136	0.329545	0.494318	0.727273	0.982955	0.335227
0.283784	0.418919	0.297297	0.273973	0.219178	0.205479	0.027027	0.148649	0.472973	0.662162	0.945946	0.054054	0.297297	0.513514	0.756757	1	0.013514	0.202703	0.459459	0.702703	0.986486	0.540541	0.418919	0.040541	0.136986	0	0.027397	0.013514	0.337838	0.581081	0.810811	1	0.027027	0.108108	0.27027	0.662162	0.891892	0.418919	0.418919	0.418919	0.432432	0.445946	0.391892	0.410959	0.054054	0.202703	0.391892	0.567568	0.905405	0.405405
0.344828	0.393103	0.262069	0.3125	0.194444	0.173611	0.02069	0.186207	0.537931	0.717241	1	0.041379	0.213793	0.413793	0.737931	0.993103	0.006897	0.296552	0.524138	0.731034	0.965517	0.606897	0.158621	0.234483	0.076389	0.034722	0.020833	0.006897	0.158621	0.365517	0.62069	1	0.027586	0.289655	0.468966	0.8	0.951724	0.482759	0.531034	0.689655	0.855172	0.917241	0.482759	0.347222	0.062069	0.248276	0.468966	0.696552	0.944828	0.37931
0.393939	0.338384	0.267677	0.263959	0.203046	0.187817	0.010101	0.227273	0.520202	0.80303	0.994949	0.030303	0.237374	0.464646	0.727273	1	0.005051	0.252525	0.479798	0.636364	0.989899	0.5	0.141414	0.358586	0.071066	0.071066	0	0.005051	0.358586	0.540404	0.707071	1	0.333333	0.388889	0.530303	0.621212	0.742424	0.015152	0.09596	0.227273	0.858586	0.984848	0.373737	0.365482	0.030303	0.20202	0.373737	0.616162	0.984848	0.338384
0.332858	0.494654	0.172488	0.271755	0.131241	0.14194	0.002851	0.27655	0.523877	0.776194	1	0.001426	0.203136	0.459016	0.72345	0.998574	0.000713	0.353528	0.592302	0.783321	0.993585	0.650748	0.045617	0.303635	0.027817	0.06776	0.000713	0.000713	0.238061	0.481112	0.709195	1	0.104063	0.37206	0.567356	0.724875	0.994298	0.013542	0.326443	0.580898	0.802566	0.986458	0.329294	0.323823	0.014968	0.295795	0.503207	0.754811	0.993585	0.491091
0.324455	0.377724	0.297821	0.242718	0.174757	0.203883	0.009685	0.239709	0.472155	0.760291	0.992736	0.004843	0.217918	0.506053	0.716707	0.997579	0.002421	0.280872	0.498789	0.767554	1	0.610169	0.164649	0.225182	0.067961	0.038835	0	0.002421	0.152542	0.489104	0.697337	1	0.159806	0.246973	0.438257	0.811138	0.922518	0.213075	0.324455	0.51816	0.854722	0.985472	0.416465	0.373786	0.024213	0.317191	0.527845	0.733656	0.96368	0.384988
0.395722	0.315508	0.28877	0.241935	0.268817	0.123656	0.010695	0.294118	0.55615	0.786096	1	0.026738	0.160428	0.395722	0.727273	0.962567	0.005348	0.235294	0.518717	0.705882	0.994652	0.411765	0.085561	0.502674	0.05914	0.080645	0.005376	0.005348	0.197861	0.44385	0.684492	1	0.139037	0.176471	0.299465	0.320856	0.989305	0.032086	0.374332	0.566845	0.775401	0.967914	0.411765	0.397849	0.02139	0.165775	0.385027	0.657754	0.983957	0.347594
0.363529	0.375294	0.261176	0.270907	0.175501	0.204947	0.004706	0.238824	0.417647	0.716471	1	0.002353	0.228235	0.475294	0.732941	0.998824	0.001176	0.331765	0.603529	0.771765	0.996471	0.563529	0.123529	0.312941	0.04947	0.061249	0.002356	0.001176	0.210588	0.351765	0.598824	1	0.009412	0.498824	0.637647	0.758824	0.875294	0.021176	0.485882	0.66	0.884706	0.987059	0.487059	0.374558	0.005882	0.277647	0.556471	0.76	0.996471	0.423529
0.33564	0.422145	0.242215	0.260417	0.163194	0.215278	0.010381	0.269896	0.463668	0.747405	0.979239	0.00692	0.221453	0.543253	0.820069	1	0.00346	0.242215	0.487889	0.67474	0.989619	0.519031	0.190311	0.290657	0.083333	0.055556	0	0.00346	0.214533	0.543253	0.844291	1	0.013841	0.16263	0.346021	0.643599	0.99308	0.107266	0.304498	0.508651	0.712803	0.816609	0.449827	0.354167	0.017301	0.259516	0.574394	0.747405	0.989619	0.453287
0.3125	0.34375	0.34375	0.231579	0.210526	0.263158	0.0625	0.291667	0.520833	0.770833	0.958333	0.020833	0.1875	0.489583	0.739583	1	0.010417	0.239583	0.46875	0.645833	0.979167	0.489583	0.385417	0.125	0.115789	0.052632	0.010526	0.010417	0.40625	0.75	0.875	1	0.125	0.25	0.447917	0.614583	0.739583	0.03125	0.052083	0.083333	0.333333	0.364583	0.541667	0.336842	0.052083	0.270833	0.416667	0.65625	0.979167	0.375
0.290123	0.391975	0.317901	0.232198	0.167183	0.26935	0.018519	0.283951	0.496914	0.768519	1	0.006173	0.219136	0.521605	0.697531	0.996914	0.003086	0.246914	0.45679	0.771605	0.993827	0.623457	0.296296	0.080247	0.092879	0.037152	0	0.003086	0.225309	0.549383	0.740741	1	0.111111	0.299383	0.481481	0.756173	0.919753	0.018519	0.033951	0.058642	0.447531	0.966049	0.604938	0.28483	0.012346	0.194444	0.475309	0.712963	0.993827	0.429012
0.434555	0.356021	0.209424	0.335958	0.160105	0.15748	0.007853	0.267016	0.486911	0.730366	1	0.005236	0.269634	0.554974	0.740838	0.997382	0.002618	0.175393	0.390052	0.753927	0.994764	0.725131	0.086387	0.188482	0.031496	0.068241	0.010499	0.002618	0.209424	0.429319	0.667539	1	0.235602	0.298429	0.649215	0.798429	0.984293	0.099476	0.510471	0.696335	0.856021	0.989529	0.329843	0.278215	0.028796	0.240838	0.5	0.743455	0.994764	0.387435
0.38843	0.31405	0.297521	0.258333	0.241667	0.191667	0.016529	0.181818	0.528926	0.735537	0.991736	0.057851	0.31405	0.504132	0.826446	0.975207	0.008264	0.231405	0.413223	0.677686	1	0.380165	0.214876	0.404959	0.083333	0.066667	0	0.008264	0.231405	0.446281	0.752066	1	0.280992	0.322314	0.404959	0.487603	0.85124	0.082645	0.173554	0.619835	0.719008	0.958678	0.429752	0.283333	0.049587	0.355372	0.504132	0.793388	0.983471	0.31405
0.377622	0.34965	0.272727	0.323944	0.225352	0.140845	0.020979	0.216783	0.482517	0.692308	0.993007	0.034965	0.195804	0.391608	0.727273	0.965035	0.006993	0.34965	0.573427	0.762238	1	0.594406	0.181818	0.223776	0.077465	0.077465	0.021127	0.006993	0.167832	0.356643	0.573427	1	0.111888	0.328671	0.685315	0.825175	0.993007	0.027972	0.559441	0.622378	0.895105	0.951049	0.482517	0.323944	0.090909	0.314685	0.496503	0.734266	0.979021	0.321678
0.354108	0.458924	0.186969	0.292614	0.116477	0.198864	0.008499	0.215297	0.371105	0.674221	0.988669	0.005666	0.294618	0.543909	0.78187	1	0.002833	0.303116	0.498584	0.747875	0.997167	0.866856	0.036827	0.096317	0.019886	0.03125	0.014205	0.002833	0.252125	0.535411	0.776204	1	0.016997	0.022663	0.076487	0.345609	0.86119	0.067989	0.25779	0.29745	0.354108	0.569405	0.31728	0.323864	0.014164	0.314448	0.518414	0.756374	0.983003	0.444759
0.302041	0.412245	0.285714	0.237705	0.20082	0.221311	0.020408	0.191837	0.42449	0.75102	1	0.008163	0.244898	0.485714	0.714286	0.995918	0.004082	0.289796	0.567347	0.771429	0.991837	0.485714	0.257143	0.257143	0.07377	0.065574	0	0.004082	0.232653	0.379592	0.677551	1	0.089796	0.187755	0.497959	0.673469	0.820408	0.012245	0.461224	0.722449	0.902041	0.987755	0.595918	0.344262	0.016327	0.306122	0.530612	0.722449	0.991837	0.440816
0.313953	0.313123	0.372924	0.203658	0.226933	0.237739	0.003322	0.215116	0.497508	0.769103	0.999169	0.001661	0.288206	0.503322	0.753322	1	0.000831	0.240033	0.486711	0.740864	0.998339	0.297342	0.017442	0.685216	0.009144	0.103907	0.002494	0.000831	0.320598	0.581395	0.789867	1	0.408638	0.608804	0.83804	0.973422	0.997508	0.002492	0.213455	0.464286	0.726744	0.9701	0.604651	0.36409	0.002492	0.262458	0.475914	0.723422	0.998339	0.354651
0.436782	0.350575	0.212644	0.33526	0.156069	0.150289	0.017241	0.218391	0.494253	0.758621	1	0.011494	0.258621	0.488506	0.729885	0.971264	0.005747	0.229885	0.45977	0.683908	0.867816	0.574713	0.178161	0.247126	0.121387	0.052023	0.00578	0.005747	0.247126	0.465517	0.816092	1	0.022989	0.431034	0.591954	0.695402	0.867816	0.04023	0.166667	0.298851	0.551724	0.770115	0.33908	0.346821	0.022989	0.287356	0.482759	0.678161	0.856322	0.385057
0.37395	0.380952	0.245098	0.304348	0.165498	0.178121	0.007003	0.271709	0.528011	0.80112	1	0.002801	0.256303	0.522409	0.780112	0.997199	0.001401	0.208683	0.418768	0.64986	0.957983	0.509804	0.121849	0.368347	0.040673	0.057504	0.007013	0.001401	0.292717	0.670868	0.872549	1	0.060224	0.264706	0.414566	0.539216	0.642857	0.004202	0.190476	0.406162	0.64986	0.757703	0.487395	0.350631	0.004202	0.229692	0.441176	0.654062	0.990196	0.389356
0.356989	0.322581	0.32043	0.200431	0.213362	0.221983	0.004301	0.288172	0.516129	0.862366	0.997849	0.006452	0.191398	0.466667	0.705376	0.978495	0.002151	0.245161	0.492473	0.686022	1	0.490323	0.139785	0.369892	0.05819	0.084052	0.006466	0.002151	0.288172	0.670968	0.877419	1	0.010753	0.255914	0.423656	0.634409	0.748387	0.036559	0.223656	0.397849	0.565591	0.862366	0.509677	0.323276	0.008602	0.217204	0.412903	0.64086	0.995699	0.363441
0.349709	0.35682	0.293471	0.249677	0.209573	0.217982	0.003232	0.231416	0.499677	0.765999	0.998061	0.001293	0.264383	0.488688	0.745314	1	0.000646	0.247576	0.506141	0.741435	0.995475	0.472527	0.166774	0.360698	0.06533	0.069211	0.005821	0.000646	0.275372	0.455074	0.754363	1	0.019392	0.270847	0.461538	0.769231	0.960569	0.02521	0.173885	0.54234	0.734971	0.995475	0.528119	0.40621	0.001939	0.25404	0.500323	0.736264	0.996768	0.355527
0.446809	0.333333	0.219858	0.307143	0.157143	0.164286	0.014184	0.184397	0.475177	0.758865	1	0.021277	0.319149	0.588652	0.801418	0.992908	0.007092	0.134752	0.404255	0.659574	0.978723	0.48227	0.134752	0.382979	0.042857	0.1	0	0.007092	0.269504	0.439716	0.851064	1	0.205674	0.22695	0.375887	0.411348	0.680851	0.028369	0.134752	0.539007	0.765957	0.879433	0.404255	0.285714	0.06383	0.361702	0.489362	0.666667	0.964539	0.347518
0.27685	0.505967	0.217184	0.236842	0.145933	0.215311	0.00716	0.21957	0.424821	0.747017	0.99284	0.016706	0.362768	0.575179	0.782816	1	0.002387	0.150358	0.334129	0.630072	0.968974	0.653938	0.133652	0.212411	0.047847	0.066986	0	0.002387	0.393795	0.572792	0.792363	1	0.00716	0.090692	0.188544	0.272076	0.565632	0.0358	0.221957	0.377088	0.761337	0.995227	0.639618	0.315789	0.004773	0.315036	0.536993	0.718377	0.990453	0.465394
0.3375	0.370833	0.291667	0.23431	0.150628	0.225941	0.020833	0.233333	0.541667	0.783333	0.9875	0.016667	0.1875	0.408333	0.679167	0.995833	0.004167	0.308333	0.5375	0.729167	1	0.541667	0.2125	0.245833	0.062762	0.062762	0.012552	0.004167	0.15	0.2875	0.579167	1	0.008333	0.3875	0.591667	0.783333	0.995833	0.120833	0.441667	0.670833	0.8375	0.95	0.425	0.343096	0.0125	0.404167	0.575	0.7375	0.991667	0.408333
0.35284	0.337349	0.309811	0.237931	0.203448	0.218966	0.008606	0.32358	0.537005	0.753873	0.998279	0.006885	0.199656	0.500861	0.777969	1	0.001721	0.239243	0.432014	0.703959	0.996558	0.447504	0.170396	0.3821	0.067241	0.081034	0.005172	0.001721	0.173838	0.435456	0.784854	1	0.012048	0.211704	0.493976	0.738382	0.907057	0.089501	0.313253	0.526678	0.714286	0.958692	0.564544	0.324138	0.005164	0.246127	0.487091	0.707401	0.958692	0.380379
0.433333	0.327381	0.239286	0.280095	0.1764	0.16329	0.004762	0.205952	0.466667	0.8	1	0.002381	0.27619	0.464286	0.733333	0.99881	0.00119	0.385714	0.557143	0.719048	0.991667	0.560714	0.105952	0.333333	0.039333	0.082241	0.003576	0.00119	0.17619	0.345238	0.732143	1	0.014286	0.470238	0.597619	0.704762	0.795238	0.036905	0.415476	0.582143	0.807143	0.997619	0.392857	0.297974	0.008333	0.40119	0.536905	0.709524	0.964286	0.392857
0.387234	0.306383	0.306383	0.260684	0.269231	0.153846	0.012766	0.26383	0.519149	0.748936	0.982979	0.008511	0.246809	0.382979	0.723404	1	0.004255	0.174468	0.53617	0.761702	0.991489	0.540426	0.148936	0.310638	0.094017	0.068376	0	0.004255	0.259574	0.404255	0.73617	1	0.012766	0.06383	0.531915	0.757447	0.987234	0.089362	0.187234	0.578723	0.795745	0.957447	0.519149	0.358974	0.017021	0.319149	0.502128	0.753191	0.991489	0.32766
0.289593	0.420814	0.289593	0.213636	0.159091	0.227273	0.022624	0.20362	0.542986	0.80543	0.995475	0.00905	0.208145	0.470588	0.687783	1	0.004525	0.303167	0.488688	0.764706	0.986425	0.647059	0.180995	0.171946	0.081818	0.054545	0.018182	0.004525	0.221719	0.538462	0.782805	1	0.167421	0.447964	0.651584	0.764706	0.941176	0.022624	0.117647	0.348416	0.402715	0.977376	0.533937	0.263636	0.099548	0.348416	0.547511	0.742081	0.972851	0.434389
0.281893	0.465021	0.253086	0.226804	0.152577	0.249485	0.00823	0.240741	0.419753	0.769547	0.995885	0.004115	0.271605	0.549383	0.746914	1	0.002058	0.211934	0.471193	0.734568	0.979424	0.633745	0.158436	0.207819	0.061856	0.065979	0	0.002058	0.251029	0.567901	0.736626	1	0.004115	0.179012	0.366255	0.465021	0.979424	0.13786	0.290123	0.487654	0.790123	0.950617	0.580247	0.247423	0.006173	0.403292	0.611111	0.771605	0.979424	0.465021
0.2822	0.441389	0.276411	0.223188	0.153623	0.218841	0.01013	0.199711	0.435601	0.736614	0.997106	0.002894	0.267728	0.554269	0.778582	1	0.001447	0.250362	0.47178	0.685962	0.998553	0.603473	0.131693	0.264834	0.053623	0.065217	0.001449	0.001447	0.256151	0.578871	0.778582	1	0.005789	0.195369	0.273517	0.397974	0.985528	0.053546	0.290883	0.494935	0.6411	0.991317	0.513748	0.362319	0.007236	0.329957	0.541245	0.745297	0.991317	0.421129
0.265659	0.462203	0.272138	0.207792	0.160173	0.233766	0.030238	0.278618	0.475162	0.639309	0.993521	0.00432	0.209503	0.50108	0.796976	0.99784	0.00216	0.304536	0.509719	0.742981	1	0.730022	0.079914	0.190065	0.034632	0.04329	0.004329	0.00216	0.205184	0.490281	0.794816	1	0.023758	0.159827	0.451404	0.529158	0.833693	0.220302	0.37149	0.557235	0.650108	0.948164	0.468683	0.341991	0.008639	0.263499	0.531317	0.799136	0.963283	0.475162
0.405714	0.434286	0.16	0.270115	0.086207	0.143678	0.022857	0.217143	0.451429	0.651429	0.977143	0.011429	0.285714	0.491429	0.805714	0.988571	0.005714	0.148571	0.657143	0.788571	1	0.782857	0.04	0.177143	0.034483	0.068966	0	0.005714	0.274286	0.474286	0.748571	1	0.034286	0.034286	0.045714	0.782857	0.794286	0.137143	0.194286	0.662857	0.708571	0.948571	0.257143	0.275862	0.028571	0.228571	0.662857	0.805714	0.965714	0.422857
0.336066	0.344262	0.319672	0.231405	0.231405	0.214876	0.040984	0.180328	0.491803	0.696721	0.991803	0.032787	0.319672	0.57377	0.762295	0.97541	0.008197	0.188525	0.434426	0.721311	1	0.336066	0.221311	0.442623	0.082645	0.066116	0	0.008197	0.221311	0.467213	0.754098	1	0.245902	0.286885	0.368852	0.459016	0.852459	0.065574	0.163934	0.606557	0.713115	0.959016	0.459016	0.297521	0.02459	0.295082	0.467213	0.786885	0.983607	0.311475
0.284501	0.388535	0.326964	0.223404	0.210638	0.246809	0.006369	0.239915	0.494692	0.734607	0.985138	0.004246	0.2569	0.505308	0.753715	1	0.002123	0.235669	0.484076	0.7431	0.997877	0.392781	0.118896	0.488323	0.070213	0.112766	0.006383	0.002123	0.205945	0.526539	0.802548	1	0.048832	0.161359	0.473461	0.927813	0.997877	0.014862	0.278132	0.450106	0.66879	0.955414	0.55414	0.387234	0.008493	0.235669	0.435244	0.660297	0.995754	0.420382
0.447761	0.291045	0.261194	0.285714	0.24812	0.090226	0.052239	0.268657	0.537313	0.738806	1	0.014925	0.134328	0.402985	0.716418	0.992537	0.007463	0.19403	0.455224	0.746269	0.977612	0.470149	0.485075	0.044776	0.150376	0.015038	0	0.007463	0.335821	0.597015	0.80597	1	0.014925	0.164179	0.365672	0.58209	0.880597	0.947761	0.947761	0.962687	0.970149	0.985075	0.358209	0.43609	0.014925	0.19403	0.402985	0.589552	0.962687	0.291045
0.366925	0.421189	0.211886	0.264249	0.129534	0.173575	0.020672	0.310078	0.434109	0.723514	0.989664	0.007752	0.178295	0.472868	0.687339	1	0.002584	0.242894	0.630491	0.819121	0.992248	0.635659	0.118863	0.245478	0.041451	0.041451	0	0.002584	0.165375	0.447028	0.651163	1	0.124031	0.630491	0.739018	0.863049	0.94832	0.25323	0.333333	0.563307	0.777778	0.96124	0.364341	0.316062	0.007752	0.263566	0.565891	0.751938	0.992248	0.44186
0.270142	0.407583	0.322275	0.190476	0.209524	0.271429	0.037915	0.208531	0.374408	0.691943	0.971564	0.009479	0.222749	0.526066	0.819905	1	0.004739	0.2891	0.49763	0.7109	0.943128	0.464455	0.374408	0.161137	0.128571	0.061905	0.004762	0.004739	0.265403	0.56872	0.78673	1	0.009479	0.28436	0.43128	0.611374	0.85782	0.07109	0.208531	0.64455	0.881517	0.990521	0.417062	0.428571	0.014218	0.279621	0.450237	0.677725	0.981043	0.42654
0.407895	0.388158	0.203947	0.337748	0.15894	0.165563	0.013158	0.210526	0.460526	0.657895	1	0.026316	0.263158	0.539474	0.789474	0.967105	0.006579	0.164474	0.447368	0.730263	0.947368	0.467105	0.052632	0.480263	0.02649	0.10596	0	0.006579	0.256579	0.467105	0.651316	1	0.197368	0.203947	0.217105	0.486842	0.5	0.032895	0.184211	0.565789	0.855263	0.980263	0.388158	0.357616	0.052632	0.289474	0.605263	0.835526	0.940789	0.388158
0.364621	0.3213	0.314079	0.246377	0.257246	0.202899	0.01083	0.288809	0.498195	0.761733	1	0.00722	0.209386	0.527076	0.765343	0.981949	0.00361	0.220217	0.433213	0.696751	0.98556	0.285199	0.267148	0.447653	0.068841	0.061594	0.01087	0.00361	0.129964	0.451264	0.722022	1	0.028881	0.148014	0.314079	0.711191	0.99278	0.039711	0.407942	0.537906	0.750903	0.960289	0.472924	0.478261	0.025271	0.231047	0.527076	0.743682	0.98556	0.303249
0.388805	0.376702	0.234493	0.268182	0.183333	0.178788	0.007564	0.310136	0.518911	0.7882	0.998487	0.003026	0.183056	0.453858	0.738275	1	0.001513	0.26475	0.481089	0.70348	0.966717	0.540091	0.161876	0.298033	0.065152	0.062121	0.001515	0.001513	0.217852	0.523449	0.742814	1	0.102874	0.234493	0.376702	0.487141	0.92587	0.013616	0.325265	0.608169	0.898638	0.995461	0.490166	0.306061	0.019667	0.313162	0.596067	0.768533	0.971256	0.379728
0.345397	0.398899	0.255704	0.258268	0.174803	0.219685	0.001574	0.250197	0.442958	0.804091	0.998426	0.00236	0.270653	0.536585	0.734854	1	0.000787	0.203777	0.488592	0.704957	0.993706	0.70417	0.060582	0.235248	0.037795	0.059843	0.00315	0.000787	0.338316	0.594807	0.795437	1	0.04878	0.399685	0.449253	0.641227	0.994493	0.001574	0.087333	0.20535	0.390244	0.976397	0.40834	0.370079	0.00236	0.284815	0.535012	0.738788	0.993706	0.422502
0.352542	0.342373	0.305085	0.220488	0.234057	0.195387	0.001356	0.237288	0.506441	0.738983	0.997966	0.010847	0.246102	0.484746	0.761356	1	0.000678	0.261017	0.503729	0.738305	0.99661	0.426441	0.144407	0.429153	0.069878	0.078019	0.004749	0.000678	0.277966	0.460339	0.701017	1	0.007458	0.388475	0.550508	0.810169	0.991864	0.004746	0.186441	0.505085	0.757288	0.96	0.486102	0.421981	0.004746	0.265085	0.51322	0.774915	0.991864	0.355932
0.431193	0.238532	0.330275	0.222222	0.296296	0.148148	0.027523	0.229358	0.486239	0.688073	0.981651	0.018349	0.238532	0.412844	0.724771	0.990826	0.009174	0.211009	0.495413	0.788991	1	0.449541	0.311927	0.238532	0.12963	0.055556	0	0.009174	0.238532	0.59633	0.834862	1	0.256881	0.495413	0.614679	0.779817	0.963303	0.055046	0.155963	0.220183	0.394495	0.458716	0.440367	0.388889	0.055046	0.211009	0.495413	0.816514	0.963303	0.256881
0.333333	0.371795	0.294872	0.206452	0.206452	0.212903	0.019231	0.339744	0.570513	0.782051	0.99359	0.012821	0.282051	0.519231	0.74359	1	0.00641	0.173077	0.391026	0.641026	0.961538	0.326923	0.089744	0.583333	0.03871	0.090323	0	0.00641	0.076923	0.352564	0.705128	1	0.455128	0.467949	0.49359	0.532051	0.570513	0.134615	0.288462	0.615385	0.794872	0.980769	0.442308	0.425806	0.044872	0.275641	0.551282	0.74359	0.980769	0.358974
0.34662	0.414211	0.239168	0.236111	0.170139	0.199653	0.003466	0.275563	0.481802	0.717504	0.996534	0.006932	0.233969	0.551127	0.760832	1	0.001733	0.242634	0.433276	0.753899	0.993068	0.594454	0.02253	0.383016	0.010417	0.100694	0.013889	0.001733	0.207972	0.514731	0.755633	1	0.02773	0.031196	0.554593	0.712305	0.816291	0.045061	0.311958	0.464471	0.69844	0.994801	0.384749	0.357639	0.010399	0.244367	0.485269	0.769497	0.993068	0.410745
0.376712	0.273973	0.349315	0.186207	0.268966	0.206897	0.020548	0.184932	0.472603	0.719178	0.958904	0.013699	0.280822	0.486301	0.828767	1	0.006849	0.219178	0.513699	0.705479	0.965753	0.369863	0.150685	0.479452	0.055172	0.055172	0.013793	0.006849	0.150685	0.294521	0.458904	1	0.191781	0.219178	0.410959	0.445205	0.746575	0.068493	0.5	0.623288	0.856164	0.979452	0.445205	0.372414	0.047945	0.363014	0.541096	0.705479	0.972603	0.246575
0.352554	0.31631	0.331137	0.19637	0.239274	0.219472	0.003295	0.265239	0.518946	0.818781	0.998353	0.016474	0.243822	0.500824	0.708402	0.99341	0.001647	0.230643	0.469522	0.705107	1	0.490939	0.169687	0.339374	0.061056	0.064356	0.00495	0.001647	0.248764	0.52883	0.759473	1	0.031301	0.23888	0.444811	0.546952	0.869852	0.008237	0.261944	0.589786	0.820428	0.996705	0.439868	0.333333	0.011532	0.217463	0.500824	0.688633	0.995058	0.350906
0.403756	0.333333	0.262911	0.259434	0.254717	0.15566	0.014085	0.267606	0.492958	0.741784	1	0.00939	0.183099	0.408451	0.690141	0.995305	0.004695	0.319249	0.58216	0.779343	0.985915	0.488263	0.173709	0.338028	0.061321	0.070755	0.023585	0.004695	0.15493	0.516432	0.723005	1	0.230047	0.483568	0.638498	0.943662	0.99061	0.037559	0.328638	0.42723	0.737089	0.924883	0.460094	0.424528	0.018779	0.342723	0.502347	0.70892	0.985915	0.328638
0.330855	0.360595	0.30855	0.208955	0.208955	0.227612	0.01487	0.178439	0.431227	0.70632	0.992565	0.007435	0.297398	0.546468	0.810409	1	0.003717	0.260223	0.505576	0.69145	0.98513	0.457249	0.200743	0.342007	0.093284	0.070896	0.011194	0.003717	0.289963	0.505576	0.851301	1	0.122677	0.315985	0.486989	0.672862	0.907063	0.011152	0.104089	0.449814	0.713755	0.914498	0.531599	0.395522	0.02974	0.315985	0.498141	0.69145	0.98513	0.405204
0.384988	0.336562	0.27845	0.228155	0.208738	0.196602	0.004843	0.254237	0.440678	0.7046	0.990315	0.014528	0.244552	0.539952	0.767554	1	0.002421	0.234867	0.501211	0.774818	0.992736	0.476998	0.133172	0.389831	0.048544	0.072816	0.004854	0.002421	0.251816	0.566586	0.801453	1	0.094431	0.53753	0.670702	0.830508	0.932203	0.029056	0.186441	0.358354	0.501211	0.895884	0.401937	0.398058	0.009685	0.280872	0.527845	0.765133	0.992736	0.338983
0.353211	0.330275	0.316514	0.239631	0.248848	0.179724	0.022936	0.201835	0.472477	0.733945	0.995413	0.009174	0.266055	0.522936	0.770642	1	0.004587	0.238532	0.463303	0.651376	0.981651	0.353211	0.224771	0.422018	0.078341	0.069124	0.013825	0.004587	0.288991	0.619266	0.83945	1	0.178899	0.247706	0.431193	0.697248	0.940367	0.027523	0.133028	0.481651	0.591743	0.986239	0.5	0.442396	0.013761	0.266055	0.518349	0.729358	0.981651	0.293578
0.394231	0.288462	0.317308	0.213592	0.271845	0.174757	0.019231	0.278846	0.461538	0.701923	0.990385	0.048077	0.173077	0.442308	0.721154	0.971154	0.009615	0.240385	0.490385	0.788462	1	0.326923	0.336538	0.336538	0.116505	0.058252	0.019417	0.009615	0.125	0.5	0.625	1	0.028846	0.153846	0.480769	0.692308	0.990385	0.259615	0.326923	0.413462	0.836538	0.951923	0.490385	0.407767	0.038462	0.211538	0.528846	0.730769	0.980769	0.269231
0.448485	0.369697	0.181818	0.317073	0.189024	0.121951	0.024242	0.242424	0.509091	0.775758	1	0.012121	0.163636	0.381818	0.727273	0.981818	0.006061	0.406061	0.557576	0.69697	0.884848	0.575758	0.151515	0.272727	0.054878	0.054878	0.030488	0.006061	0.139394	0.30303	0.624242	1	0.242424	0.4	0.606061	0.666667	0.860606	0.406061	0.466667	0.775758	0.866667	0.939394	0.436364	0.390244	0.078788	0.278788	0.466667	0.69697	0.933333	0.430303
0.330935	0.359712	0.309353	0.202899	0.217391	0.23913	0.014388	0.302158	0.503597	0.827338	0.985612	0.028777	0.280576	0.532374	0.719424	1	0.007194	0.194245	0.410072	0.647482	0.992806	0.345324	0.309353	0.345324	0.123188	0.07971	0.007246	0.007194	0.230216	0.453237	0.697842	1	0.021583	0.258993	0.489209	0.71223	0.992806	0.05036	0.129496	0.539568	0.798561	0.913669	0.539568	0.463768	0.021583	0.23741	0.489209	0.726619	0.978417	0.467626
0.445378	0.218487	0.336134	0.118644	0.322034	0.169492	0.016807	0.210084	0.521008	0.705882	0.991597	0.07563	0.235294	0.571429	0.848739	0.941176	0.008403	0.243697	0.436975	0.630252	1	0.470588	0.042017	0.487395	0.008475	0.127119	0.008475	0.008403	0.134454	0.722689	0.848739	1	0.151261	0.151261	0.159664	0.168067	0.184874	0.02521	0.319328	0.504202	0.621849	0.983193	0.403361	0.389831	0.033613	0.201681	0.411765	0.714286	0.966387	0.201681
0.309577	0.447661	0.242762	0.261161	0.189732	0.178571	0.013363	0.200445	0.427617	0.697105	0.995546	0.008909	0.33853	0.565702	0.815145	1	0.002227	0.18931	0.365256	0.694878	0.997773	0.632517	0.160356	0.207127	0.060268	0.060268	0.002232	0.002227	0.298441	0.550111	0.790646	1	0.024499	0.135857	0.342984	0.708241	0.975501	0.053452	0.211581	0.423163	0.757238	0.993318	0.510022	0.334821	0.004454	0.267261	0.550111	0.806236	0.988864	0.432071
0.333333	0.312684	0.353982	0.213018	0.236686	0.224852	0.00885	0.250737	0.533923	0.781711	0.99705	0.0059	0.185841	0.386431	0.646018	0.99115	0.00295	0.300885	0.501475	0.761062	1	0.39233	0.19469	0.412979	0.065089	0.076923	0	0.00295	0.218289	0.427729	0.654867	1	0.156342	0.286136	0.489676	0.79941	0.952802	0.011799	0.215339	0.536873	0.831858	0.99115	0.542773	0.343195	0.00885	0.256637	0.486726	0.731563	0.9941	0.330383
0.270833	0.34375	0.385417	0.2	0.221053	0.284211	0.020833	0.166667	0.364583	0.614583	0.979167	0.041667	0.25	0.552083	0.71875	0.96875	0.010417	0.28125	0.5	0.802083	1	0.46875	0.322917	0.208333	0.147368	0.042105	0	0.010417	0.229167	0.614583	0.84375	1	0.041667	0.270833	0.552083	0.78125	0.90625	0.125	0.166667	0.354167	0.40625	0.458333	0.34375	0.378947	0.041667	0.1875	0.416667	0.5625	0.927083	0.260417
0.37218	0.319549	0.308271	0.218868	0.230189	0.211321	0.007519	0.229323	0.522556	0.815789	1	0.011278	0.266917	0.484962	0.62406	0.996241	0.003759	0.18797	0.530075	0.75188	0.954887	0.552632	0.342105	0.105263	0.10566	0.015094	0	0.003759	0.285714	0.515038	0.721805	1	0.011278	0.131579	0.37218	0.676692	0.883459	0.236842	0.259398	0.928571	0.954887	0.981203	0.518797	0.354717	0.011278	0.24812	0.533835	0.714286	0.966165	0.330827
0.369444	0.277778	0.352778	0.189415	0.261838	0.222841	0.005556	0.280556	0.508333	0.766667	0.997222	0.011111	0.191667	0.461111	0.741667	0.983333	0.002778	0.263889	0.505556	0.730556	1	0.313889	0.108333	0.577778	0.044568	0.10585	0.005571	0.002778	0.152778	0.333333	0.616667	1	0.005556	0.072222	0.169444	0.261111	0.341667	0.022222	0.433333	0.644444	0.816667	0.994444	0.583333	0.37883	0.008333	0.252778	0.455556	0.694444	0.994444	0.291667
0.3711	0.417077	0.211823	0.291118	0.149671	0.179276	0.006568	0.244663	0.441708	0.71757	0.998358	0.003284	0.195402	0.44335	0.729064	0.996716	0.001642	0.45977	0.632184	0.793103	1	0.658456	0.119869	0.221675	0.03125	0.057566	0.008224	0.001642	0.167488	0.331691	0.622332	1	0.507389	0.640394	0.783251	0.876847	0.996716	0.006568	0.482759	0.632184	0.765189	0.950739	0.330049	0.223684	0.021346	0.536946	0.694581	0.834154	0.995074	0.431856
0.415385	0.292308	0.292308	0.248062	0.286822	0.20155	0.030769	0.223077	0.476923	0.738462	1	0.023077	0.230769	0.538462	0.746154	0.992308	0.007692	0.238462	0.484615	0.676923	0.915385	0.484615	0.238462	0.276923	0.077519	0.062016	0	0.007692	0.123077	0.407692	0.738462	1	0.146154	0.192308	0.507692	0.861538	0.923077	0.084615	0.346154	0.661538	0.730769	0.815385	0.361538	0.372093	0.161538	0.315385	0.561538	0.715385	0.915385	0.269231
0.386207	0.324138	0.289655	0.298611	0.1875	0.229167	0.034483	0.289655	0.462069	0.703448	0.986207	0.013793	0.241379	0.517241	0.751724	0.993103	0.006897	0.151724	0.434483	0.724138	1	0.462069	0.144828	0.393103	0.097222	0.083333	0.013889	0.006897	0.234483	0.510345	0.772414	1	0.068966	0.117241	0.268966	0.703448	0.903448	0.131034	0.289655	0.427586	0.655172	0.958621	0.42069	0.333333	0.062069	0.17931	0.372414	0.696552	0.972414	0.372414
0.467005	0.294416	0.238579	0.244275	0.193384	0.157761	0.007614	0.203046	0.406091	0.695431	0.992386	0.020305	0.256345	0.525381	0.779188	0.984772	0.002538	0.393401	0.604061	0.77665	1	0.5	0.203046	0.296954	0.061069	0.066158	0.005089	0.002538	0.182741	0.43401	0.72335	1	0.007614	0.634518	0.738579	0.878173	0.964467	0.111675	0.27665	0.370558	0.527919	0.984772	0.393401	0.26972	0.010152	0.48731	0.659898	0.819797	0.977157	0.347716
0.337963	0.37963	0.282407	0.269767	0.15814	0.237209	0.009259	0.277778	0.509259	0.731481	0.986111	0.018519	0.240741	0.430556	0.763889	1	0.00463	0.185185	0.523148	0.717593	0.944444	0.541667	0.143519	0.314815	0.083721	0.065116	0	0.00463	0.273148	0.416667	0.722222	1	0.009259	0.055556	0.564815	0.712963	0.893519	0.092593	0.194444	0.541667	0.763889	0.949074	0.49537	0.353488	0.013889	0.324074	0.509259	0.75	0.949074	0.375
0.458993	0.316547	0.22446	0.244957	0.197406	0.161383	0.01295	0.351079	0.509353	0.776978	1	0.002878	0.230216	0.648921	0.808633	0.995683	0.001439	0.156835	0.332374	0.6	0.997122	0.447482	0.094964	0.457554	0.036023	0.056196	0.004323	0.001439	0.230216	0.72518	0.85036	1	0.004317	0.048921	0.146763	0.305036	0.789928	0.020144	0.374101	0.489209	0.602878	0.968345	0.261871	0.268012	0.005755	0.128058	0.277698	0.666187	0.905036	0.339568
0.36	0.36	0.28	0.28125	0.209821	0.196429	0.008889	0.248889	0.457778	0.751111	0.995556	0.044444	0.32	0.551111	0.742222	1	0.004444	0.173333	0.417778	0.72	0.951111	0.4	0.217778	0.382222	0.066964	0.058036	0.004464	0.004444	0.333333	0.671111	0.888889	1	0.137778	0.204444	0.373333	0.773333	0.866667	0.017778	0.106667	0.426667	0.524444	0.973333	0.462222	0.428571	0.026667	0.24	0.493333	0.68	0.862222	0.36
0.349345	0.355167	0.295488	0.247813	0.225948	0.186589	0.002911	0.269287	0.532751	0.761281	1	0.014556	0.243086	0.499272	0.742358	0.994178	0.001456	0.234352	0.462882	0.730713	0.998544	0.365357	0.211063	0.423581	0.102041	0.075802	0.005831	0.001456	0.259098	0.491994	0.820961	1	0.008734	0.206696	0.416303	0.88064	0.997089	0.032023	0.285298	0.540029	0.681223	0.925764	0.534207	0.393586	0.010189	0.247453	0.467249	0.69869	0.998544	0.378457
0.328767	0.394521	0.276712	0.252747	0.173077	0.17033	0.005479	0.219178	0.463014	0.726027	1	0.016438	0.252055	0.542466	0.805479	0.989041	0.00274	0.30137	0.479452	0.673973	0.994521	0.545205	0.189041	0.265753	0.07967	0.074176	0.002747	0.00274	0.249315	0.536986	0.772603	1	0.035616	0.391781	0.512329	0.641096	0.936986	0.005479	0.139726	0.276712	0.789041	0.917808	0.471233	0.368132	0.010959	0.345205	0.515068	0.715068	0.994521	0.405479
0.29904	0.460905	0.240055	0.233516	0.144231	0.206044	0.004115	0.201646	0.530864	0.759945	1	0.002743	0.231824	0.41701	0.689986	0.994513	0.001372	0.29904	0.603567	0.805213	0.998628	0.714678	0.106996	0.178326	0.049451	0.052198	0.002747	0.001372	0.224966	0.441701	0.659808	1	0.009602	0.283951	0.709191	0.840878	0.997257	0.082305	0.364883	0.670782	0.875171	0.972565	0.499314	0.326923	0.005487	0.286694	0.518519	0.716049	0.995885	0.45679
0.422018	0.357798	0.220183	0.285714	0.142857	0.193548	0.041284	0.362385	0.619266	0.802752	1	0.009174	0.183486	0.481651	0.752294	0.995413	0.004587	0.169725	0.325688	0.550459	0.990826	0.555046	0.197248	0.247706	0.078341	0.059908	0.004608	0.004587	0.270642	0.522936	0.711009	1	0.050459	0.188073	0.348624	0.536697	0.963303	0.105505	0.288991	0.619266	0.779817	0.986239	0.311927	0.359447	0.03211	0.192661	0.348624	0.674312	0.963303	0.385321
0.330909	0.485455	0.183636	0.315118	0.142077	0.143898	0.005455	0.236364	0.452727	0.656364	1	0.003636	0.310909	0.650909	0.838182	0.998182	0.001818	0.167273	0.325455	0.470909	0.869091	0.732727	0.147273	0.12	0.063752	0.034608	0.001821	0.001818	0.338182	0.629091	0.816364	1	0.098182	0.169091	0.256364	0.383636	0.705455	0.047273	0.083636	0.327273	0.476364	0.534545	0.358182	0.31694	0.052727	0.234545	0.387273	0.732727	0.985455	0.496364
0.373585	0.403774	0.222642	0.234139	0.164653	0.173716	0.005283	0.209811	0.438491	0.69283	0.999245	0.001509	0.273208	0.544151	0.759245	0.996226	0.000755	0.283774	0.529057	0.802264	1	0.671698	0.068679	0.259623	0.029456	0.062689	0.005287	0.000755	0.237736	0.533585	0.77283	1	0.002264	0.050566	0.480755	0.687547	0.903396	0.009811	0.306415	0.426415	0.676981	0.96	0.477736	0.291541	0.003774	0.32	0.632453	0.86717	0.996226	0.446038
0.462451	0.359684	0.177866	0.345238	0.150794	0.107143	0.011858	0.209486	0.466403	0.747036	1	0.007905	0.316206	0.533597	0.727273	0.988142	0.003953	0.193676	0.347826	0.743083	0.956522	0.758893	0.146245	0.094862	0.047619	0.031746	0.015873	0.003953	0.312253	0.549407	0.73913	1	0.106719	0.150198	0.201581	0.324111	0.391304	0.245059	0.379447	0.841897	0.865613	0.928854	0.343874	0.293651	0.110672	0.241107	0.43083	0.798419	0.956522	0.367589
0.344	0.344	0.312	0.217742	0.25	0.217742	0.016	0.168	0.4	0.712	0.992	0.024	0.296	0.472	0.72	0.976	0.008	0.216	0.512	0.792	1	0.312	0.208	0.48	0.080645	0.080645	0	0.008	0.232	0.472	0.816	1	0.248	0.288	0.368	0.448	0.856	0.032	0.16	0.592	0.712	0.96	0.472	0.306452	0.032	0.32	0.48	0.784	0.984	0.392
0.338983	0.317797	0.34322	0.221277	0.259574	0.246809	0.012712	0.190678	0.394068	0.682203	1	0.008475	0.326271	0.550847	0.792373	0.991525	0.004237	0.241525	0.512712	0.741525	0.995763	0.45339	0.165254	0.381356	0.076596	0.102128	0.008511	0.004237	0.186441	0.525424	0.690678	1	0.275424	0.34322	0.402542	0.648305	0.987288	0.012712	0.211864	0.487288	0.834746	0.966102	0.533898	0.451064	0.021186	0.351695	0.588983	0.75	0.995763	0.326271
0.412371	0.28866	0.298969	0.197917	0.21875	0.260417	0.030928	0.195876	0.42268	0.701031	0.979381	0.020619	0.268041	0.536082	0.783505	0.989691	0.010309	0.319588	0.515464	0.721649	1	0.216495	0	0.783505	0	0.0625	0	0.010309	0.453608	0.71134	0.762887	1	0	0	0	0	0	0.041237	0.226804	0.42268	0.670103	0.948454	0.309278	0.395833	0.061856	0.319588	0.56701	0.721649	0.969072	0.278351
0.385993	0.379479	0.234528	0.256117	0.150082	0.190865	0.008143	0.153094	0.436482	0.71987	1	0.003257	0.245928	0.454397	0.747557	0.996743	0.001629	0.387622	0.581433	0.781759	0.998371	0.478827	0.149837	0.371336	0.052202	0.081566	0.003263	0.001629	0.179153	0.399023	0.729642	1	0.271987	0.511401	0.666124	0.781759	0.996743	0.017915	0.307818	0.493485	0.752443	0.959283	0.467427	0.309951	0.013029	0.384365	0.568404	0.763844	0.998371	0.420195
0.331801	0.444853	0.223346	0.285189	0.160074	0.181233	0.004596	0.241728	0.528493	0.761029	0.999081	0.001838	0.215993	0.442096	0.770221	1	0.000919	0.335478	0.536765	0.694853	0.996324	0.670037	0.098346	0.231618	0.041398	0.061638	0.00276	0.000919	0.206801	0.443015	0.807904	1	0.025735	0.471507	0.591912	0.690257	0.992647	0.073529	0.272978	0.485294	0.639706	0.988051	0.451287	0.342226	0.011029	0.390625	0.564338	0.767463	0.996324	0.434743
0.405263	0.289474	0.305263	0.242744	0.229551	0.189974	0.013158	0.242105	0.510526	0.789474	1	0.005263	0.268421	0.526316	0.768421	0.997368	0.002632	0.231579	0.447368	0.655263	0.978947	0.439474	0.134211	0.426316	0.047493	0.079156	0.005277	0.002632	0.336842	0.584211	0.831579	1	0.15	0.289474	0.378947	0.568421	0.660526	0.007895	0.121053	0.413158	0.707895	0.992105	0.5	0.343008	0.015789	0.221053	0.439474	0.636842	0.978947	0.328947
0.401961	0.294118	0.303922	0.237624	0.207921	0.178218	0.039216	0.27451	0.558824	0.735294	1	0.019608	0.22549	0.441176	0.794118	0.990196	0.009804	0.147059	0.45098	0.686275	0.892157	0.509804	0.196078	0.294118	0.089109	0.069307	0.009901	0.009804	0.215686	0.372549	0.647059	1	0.117647	0.284314	0.54902	0.686275	0.735294	0.029412	0.392157	0.470588	0.813725	0.892157	0.401961	0.356436	0.029412	0.176471	0.421569	0.686275	0.882353	0.27451
0.360153	0.426564	0.213282	0.299233	0.153453	0.193095	0.014049	0.296296	0.500639	0.719029	0.998723	0.002554	0.222222	0.532567	0.772669	1	0.001277	0.215837	0.448276	0.722861	0.960409	0.598978	0.148148	0.252874	0.056266	0.053708	0.002558	0.001277	0.226054	0.550447	0.753512	1	0.016603	0.199234	0.348659	0.482759	0.597701	0.015326	0.338442	0.572158	0.905492	0.997446	0.526181	0.319693	0.003831	0.263091	0.560664	0.738186	0.98212	0.435504
0.336694	0.540323	0.122984	0.335354	0.064646	0.119192	0.006048	0.227823	0.5	0.709677	0.997984	0.008065	0.294355	0.542339	0.754032	1	0.002016	0.080645	0.284274	0.77621	0.969758	0.889113	0.0625	0.048387	0.032323	0.016162	0	0.002016	0.3125	0.53629	0.760081	1	0.018145	0.072581	0.104839	0.157258	0.965726	0.042339	0.052419	0.122984	0.135081	0.945565	0.580645	0.339394	0.016129	0.326613	0.540323	0.747984	0.979839	0.493952
0.375	0.291667	0.333333	0.197605	0.299401	0.209581	0.017857	0.25	0.52381	0.77381	1	0.029762	0.196429	0.428571	0.702381	0.958333	0.005952	0.279762	0.535714	0.755952	0.988095	0.404762	0.261905	0.333333	0.095808	0.05988	0.011976	0.005952	0.136905	0.404762	0.660714	1	0.089286	0.47619	0.720238	0.815476	0.892857	0.154762	0.25	0.505952	0.589286	0.982143	0.410714	0.431138	0.029762	0.279762	0.517857	0.702381	0.982143	0.27381
0.279412	0.411765	0.308824	0.19403	0.208955	0.253731	0.029412	0.147059	0.573529	0.882353	1	0.058824	0.25	0.441176	0.676471	0.941176	0.014706	0.220588	0.367647	0.588235	0.897059	0.529412	0.25	0.220588	0.089552	0.029851	0	0.014706	0.132353	0.426471	0.647059	1	0.161765	0.205882	0.323529	0.455882	0.529412	0.691176	0.720588	0.779412	0.838235	0.897059	0.411765	0.477612	0.073529	0.264706	0.529412	0.661765	0.897059	0.382353
0.342045	0.409091	0.248864	0.262799	0.171786	0.188851	0.006818	0.228409	0.496591	0.767045	0.996591	0.002273	0.351136	0.544318	0.754545	1	0.001136	0.165909	0.385227	0.6875	0.998864	0.760227	0.063636	0.176136	0.031854	0.031854	0.002275	0.001136	0.3875	0.584091	0.792045	1	0.029545	0.138636	0.231818	0.648864	0.868182	0.009091	0.056818	0.163636	0.281818	0.994318	0.270455	0.304892	0.003409	0.122727	0.25	0.442045	0.995455	0.404545
0.350195	0.422179	0.227626	0.306043	0.17154	0.177388	0.005837	0.254864	0.59144	0.77821	1	0.003891	0.266537	0.511673	0.805447	0.996109	0.001946	0.177043	0.385214	0.568093	0.98249	0.651751	0.054475	0.293774	0.017544	0.060429	0.009747	0.001946	0.235409	0.614786	0.815175	1	0.054475	0.085603	0.099222	0.552529	0.957198	0.013619	0.27821	0.472763	0.571984	0.984436	0.507782	0.2846	0.009728	0.200389	0.424125	0.579767	0.98249	0.431907
0.592357	0.269639	0.138004	0.261702	0.123404	0.095745	0.006369	0.350318	0.58811	0.781316	1	0.004246	0.195329	0.358811	0.677282	0.995754	0.002123	0.142251	0.284501	0.666667	0.997877	0.783439	0.063694	0.152866	0.025532	0.038298	0	0.002123	0.390658	0.592357	0.796178	1	0.220807	0.278132	0.316348	0.36518	0.974522	0.014862	0.133758	0.171975	0.333333	0.855626	0.195329	0.187234	0.010616	0.127389	0.286624	0.403397	0.993631	0.346072
0.363484	0.353434	0.283082	0.278523	0.209732	0.191275	0.0067	0.281407	0.561139	0.777219	1	0.00335	0.18258	0.450586	0.720268	0.99665	0.001675	0.283082	0.470687	0.703518	0.9866	0.467337	0.142379	0.390285	0.055369	0.075503	0.005034	0.001675	0.20268	0.561139	0.772194	1	0.0067	0.288107	0.440536	0.631491	0.931323	0.033501	0.266332	0.497487	0.785595	0.917923	0.472362	0.33557	0.011725	0.229481	0.440536	0.676717	0.9866	0.370184
0.315305	0.402762	0.281933	0.240783	0.192396	0.248848	0.005754	0.243959	0.475259	0.713464	0.998849	0.002301	0.254315	0.508631	0.758343	1	0.001151	0.227848	0.517837	0.75374	0.997699	0.497123	0.228999	0.273878	0.102535	0.056452	0.003456	0.001151	0.216341	0.471807	0.741082	1	0.039125	0.180667	0.43153	0.812428	0.997699	0.006904	0.331415	0.542002	0.697353	0.991945	0.562716	0.40553	0.003452	0.247411	0.479862	0.733026	0.997699	0.432681
0.367206	0.323326	0.309469	0.217593	0.206019	0.236111	0.004619	0.198614	0.454965	0.73903	1	0.006928	0.247113	0.484988	0.748268	0.995381	0.002309	0.309469	0.56351	0.762125	0.990762	0.466513	0.106236	0.427252	0.041667	0.092593	0.00463	0.002309	0.221709	0.508083	0.7806	1	0.020785	0.371824	0.51963	0.572748	0.986143	0.036952	0.256351	0.487298	0.759815	0.972286	0.515012	0.398148	0.009238	0.364896	0.577367	0.787529	0.990762	0.314088
0.313997	0.330391	0.355612	0.195707	0.25	0.248737	0.002522	0.257251	0.515763	0.766709	1	0.005044	0.248424	0.489281	0.708701	0.993695	0.001261	0.237074	0.498108	0.750315	0.997478	0.455233	0.249685	0.295082	0.10101	0.05303	0.002525	0.001261	0.209332	0.461538	0.740227	1	0.039092	0.200504	0.421185	0.796974	0.997478	0.006305	0.320303	0.544767	0.704918	0.992434	0.572509	0.411616	0.003783	0.25599	0.474149	0.728878	0.997478	0.354351
0.445321	0.296505	0.258174	0.231377	0.215576	0.170429	0.003382	0.229989	0.43292	0.721533	0.997745	0.002255	0.285231	0.551297	0.759865	0.998873	0.001127	0.275085	0.532131	0.770011	1	0.478016	0.19053	0.331454	0.072235	0.085779	0.002257	0.001127	0.207441	0.473506	0.737317	1	0.003382	0.290868	0.543405	0.782413	0.989853	0.016911	0.310034	0.51071	0.723788	0.978579	0.383315	0.31377	0.002255	0.29876	0.528749	0.776776	0.990981	0.337091
0.338583	0.330709	0.330709	0.26087	0.221344	0.245059	0.019685	0.208661	0.409449	0.73622	0.988189	0.007874	0.334646	0.551181	0.779528	0.992126	0.003937	0.212598	0.492126	0.720472	1	0.338583	0	0.661417	0	0.118577	0	0.003937	0.397638	0.570866	0.748031	1	0	0	0	0	0	0.019685	0.19685	0.456693	0.740157	0.996063	0.559055	0.379447	0.011811	0.279528	0.527559	0.720472	0.984252	0.354331
0.352113	0.347418	0.300469	0.264151	0.226415	0.216981	0.018779	0.253521	0.497653	0.737089	0.976526	0.00939	0.220657	0.478873	0.769953	0.995305	0.004695	0.2723	0.488263	0.723005	1	0.525822	0.230047	0.244131	0.056604	0.056604	0.009434	0.004695	0.140845	0.41784	0.680751	1	0.201878	0.314554	0.539906	0.737089	0.929577	0.122066	0.366197	0.624413	0.830986	0.953052	0.441315	0.339623	0.164319	0.361502	0.558685	0.723005	0.948357	0.384977
0.434211	0.25	0.315789	0.205298	0.304636	0.165563	0.013158	0.276316	0.460526	0.684211	1	0.085526	0.256579	0.552632	0.769737	0.986842	0.006579	0.164474	0.539474	0.796053	0.993421	0.355263	0.315789	0.328947	0.13245	0.05298	0.013245	0.006579	0.144737	0.552632	0.763158	1	0.013158	0.243421	0.605263	0.868421	0.967105	0.059211	0.309211	0.394737	0.473684	0.802632	0.375	0.450331	0.019737	0.197368	0.506579	0.723684	0.953947	0.263158
0.347286	0.339412	0.313303	0.221808	0.22927	0.21476	0.004973	0.237464	0.478243	0.736842	0.998757	0.000829	0.22586	0.507667	0.750104	1	0.000414	0.27932	0.521343	0.760464	0.999586	0.420638	0.138417	0.440945	0.05597	0.075041	0.006219	0.000414	0.183589	0.494405	0.756734	1	0.012433	0.452549	0.670949	0.878574	0.984252	0.033154	0.279735	0.445089	0.688355	0.999171	0.565271	0.396352	0.004559	0.270203	0.507667	0.741815	0.999586	0.334853
0.446043	0.244604	0.309353	0.246377	0.326087	0.086957	0.021583	0.28777	0.539568	0.76259	1	0.035971	0.23741	0.410072	0.870504	0.964029	0.007194	0.208633	0.460432	0.647482	0.978417	0.388489	0.165468	0.446043	0.057971	0.072464	0	0.007194	0.316547	0.705036	0.899281	1	0.021583	0.05036	0.258993	0.42446	0.467626	0.107914	0.208633	0.57554	0.683453	0.805755	0.359712	0.376812	0.035971	0.179856	0.446043	0.625899	0.877698	0.251799
0.31746	0.376984	0.305556	0.215139	0.195219	0.247012	0.02381	0.301587	0.527778	0.797619	1	0.007937	0.257937	0.511905	0.738095	0.972222	0.003968	0.202381	0.43254	0.68254	0.996032	0.305556	0.011905	0.68254	0.007968	0.12749	0	0.003968	0.206349	0.428571	0.666667	1	0.984127	0.984127	0.984127	0.988095	0.992063	0.011905	0.25	0.507937	0.75	0.968254	0.555556	0.390438	0.011905	0.265873	0.511905	0.706349	0.996032	0.380952
0.284333	0.31528	0.400387	0.164729	0.218992	0.255814	0.007737	0.400387	0.617021	0.810445	0.998066	0.003868	0.199226	0.468085	0.736944	1	0.001934	0.230174	0.425532	0.702128	0.992263	0.357834	0.098646	0.54352	0.03876	0.089147	0.01938	0.001934	0.413926	0.626692	0.816248	1	0.040619	0.535783	0.62089	0.793037	0.901354	0.005803	0.185687	0.363636	0.636364	0.969052	0.636364	0.375969	0.003868	0.234043	0.468085	0.72147	0.992263	0.255319
0.340839	0.458547	0.200614	0.260246	0.143443	0.17418	0.002047	0.25998	0.54043	0.734903	0.993859	0.003071	0.209826	0.463664	0.730809	0.997953	0.001024	0.322416	0.511771	0.823951	1	0.699079	0.138178	0.162743	0.052254	0.042008	0.009221	0.001024	0.203685	0.462641	0.692938	1	0.030706	0.243603	0.467758	0.86694	0.986694	0.016377	0.437052	0.711361	0.912999	0.998976	0.392016	0.286885	0.013306	0.288639	0.490276	0.811668	0.995906	0.489253
0.335821	0.380597	0.283582	0.293233	0.18797	0.233083	0.037313	0.246269	0.455224	0.701493	0.985075	0.014925	0.223881	0.514925	0.723881	0.977612	0.007463	0.238806	0.5	0.768657	1	0.373134	0.350746	0.276119	0.172932	0.052632	0.007519	0.007463	0.328358	0.559701	0.723881	1	0.179104	0.380597	0.552239	0.813433	0.992537	0.037313	0.097015	0.246269	0.313433	0.91791	0.477612	0.406015	0.037313	0.246269	0.567164	0.791045	0.992537	0.373134
0.340836	0.363344	0.29582	0.245161	0.183871	0.2	0.009646	0.308682	0.578778	0.778135	1	0.006431	0.167203	0.434084	0.649518	0.996785	0.003215	0.276527	0.517685	0.77492	0.990354	0.421222	0.221865	0.356913	0.077419	0.058065	0	0.003215	0.167203	0.44373	0.649518	1	0.051447	0.196141	0.418006	0.755627	0.945338	0.096463	0.366559	0.572347	0.829582	0.983923	0.546624	0.335484	0.054662	0.237942	0.472669	0.726688	0.990354	0.379421
0.254777	0.503185	0.242038	0.24359	0.115385	0.237179	0.095541	0.522293	0.687898	0.859873	0.993631	0.012739	0.203822	0.426752	0.707006	1	0.006369	0.178344	0.407643	0.605096	0.929936	0.66879	0.165605	0.165605	0.083333	0.057692	0.00641	0.006369	0.248408	0.426752	0.694268	1	0.044586	0.165605	0.229299	0.496815	0.917197	0.363057	0.66879	0.751592	0.840764	0.88535	0.426752	0.320513	0.025478	0.216561	0.44586	0.624204	0.929936	0.528662
0.336134	0.386555	0.277311	0.20339	0.152542	0.245763	0.016807	0.159664	0.378151	0.638655	0.991597	0.05042	0.302521	0.605042	0.798319	1	0.008403	0.218487	0.462185	0.697479	0.97479	0.403361	0.168067	0.428571	0.067797	0.067797	0	0.008403	0.176471	0.336134	0.689076	1	0.033613	0.226891	0.394958	0.436975	0.747899	0.067227	0.487395	0.596639	0.87395	0.983193	0.453782	0.355932	0.033613	0.386555	0.537815	0.731092	0.97479	0.403361
0.35206	0.303371	0.344569	0.229323	0.244361	0.233083	0.026217	0.284644	0.546816	0.790262	0.996255	0.007491	0.250936	0.475655	0.764045	1	0.003745	0.217228	0.449438	0.662921	0.973783	0.445693	0.333333	0.220974	0.086466	0.06391	0.018797	0.003745	0.307116	0.565543	0.842697	1	0.011236	0.247191	0.393258	0.546816	0.962547	0.037453	0.093633	0.629213	0.764045	0.917603	0.490637	0.421053	0.014981	0.269663	0.47191	0.662921	0.985019	0.325843
0.334604	0.52439	0.141006	0.278413	0.09077	0.138063	0.001524	0.259146	0.490854	0.719512	0.992378	0.005335	0.253811	0.502287	0.747713	0.999238	0.000762	0.176067	0.528201	0.832317	1	0.733994	0.057165	0.208841	0.023646	0.04958	0.005339	0.000762	0.253811	0.496189	0.724848	1	0.04878	0.279726	0.351372	0.640244	0.887957	0.023628	0.216463	0.532774	0.852134	0.974848	0.25	0.230359	0.022104	0.17378	0.370427	0.835366	0.997713	0.568598
0.51255	0.298547	0.188904	0.30291	0.186508	0.112434	0.005284	0.303831	0.593131	0.804491	0.998679	0.002642	0.180978	0.47424	0.656539	0.990753	0.001321	0.22325	0.380449	0.61823	1	0.677675	0.070013	0.252312	0.026455	0.092593	0	0.001321	0.27609	0.590489	0.792602	1	0.178336	0.228534	0.284016	0.406869	0.459709	0.014531	0.203435	0.391017	0.622193	0.959049	0.245707	0.240741	0.015852	0.198151	0.361955	0.528402	0.984148	0.406869
0.409253	0.323843	0.266904	0.253571	0.257143	0.139286	0.010676	0.241993	0.512456	0.740214	1	0.007117	0.217082	0.441281	0.765125	0.992883	0.003559	0.284698	0.494662	0.72242	0.975089	0.537367	0.117438	0.345196	0.039286	0.053571	0.010714	0.003559	0.330961	0.466192	0.754448	1	0.02847	0.078292	0.615658	0.669039	0.797153	0.081851	0.181495	0.320285	0.743772	0.950178	0.44484	0.428571	0.017794	0.288256	0.508897	0.743772	0.975089	0.359431
0.378947	0.294737	0.326316	0.223404	0.287234	0.138298	0.021053	0.189474	0.473684	0.694737	0.989474	0.031579	0.294737	0.526316	0.789474	0.978947	0.010526	0.221053	0.484211	0.736842	1	0.484211	0.494737	0.021053	0.148936	0.021277	0	0.010526	0.2	0.610526	0.726316	1	0.126316	0.263158	0.484211	0.747368	0.894737	0.042105	0.042105	0.042105	0.042105	0.052632	0.4	0.276596	0.147368	0.284211	0.536842	0.8	0.905263	0.305263
0.332031	0.332031	0.335938	0.227451	0.235294	0.243137	0.011719	0.214844	0.4375	0.730469	0.988281	0.019531	0.292969	0.539062	0.71875	0.996094	0.003906	0.246094	0.5	0.761719	1	0.460938	0.292969	0.246094	0.12549	0.062745	0	0.003906	0.230469	0.441406	0.699219	1	0.164062	0.304688	0.503906	0.761719	0.941406	0.050781	0.125	0.53125	0.8125	0.988281	0.5	0.423529	0.015625	0.324219	0.511719	0.761719	0.992188	0.382812
0.308219	0.424658	0.267123	0.237113	0.195876	0.237113	0.034247	0.321918	0.554795	0.797945	0.996575	0.006849	0.178082	0.496575	0.688356	0.986301	0.003425	0.205479	0.400685	0.743151	1	0.575342	0.208904	0.215753	0.085911	0.051546	0.003436	0.003425	0.19863	0.434932	0.702055	1	0.044521	0.39726	0.523973	0.815068	0.969178	0.020548	0.35274	0.5	0.763699	0.921233	0.39726	0.309278	0.017123	0.311644	0.496575	0.791096	0.972603	0.465753
0.346961	0.331492	0.321547	0.221239	0.220133	0.210177	0.00221	0.275138	0.524862	0.78232	1	0.00663	0.232044	0.456354	0.717127	0.99558	0.001105	0.228729	0.496133	0.728177	0.981215	0.418785	0.128177	0.453039	0.054204	0.080752	0.001106	0.001105	0.245304	0.516022	0.770166	1	0.00221	0.342541	0.477348	0.643094	0.977901	0.014365	0.20663	0.509392	0.754696	0.994475	0.517127	0.391593	0.003315	0.257459	0.510497	0.708287	0.99337	0.358011
0.34589	0.400685	0.253425	0.254296	0.164948	0.185567	0.013699	0.25	0.417808	0.712329	0.993151	0.006849	0.273973	0.571918	0.777397	0.996575	0.003425	0.208904	0.523973	0.763699	1	0.59589	0.325342	0.078767	0.140893	0.024055	0.003436	0.003425	0.236301	0.462329	0.722603	1	0.034247	0.369863	0.530822	0.80137	0.986301	0.174658	0.188356	0.208904	0.732877	0.760274	0.489726	0.343643	0.010274	0.202055	0.486301	0.756849	0.989726	0.44863
0.38069	0.364138	0.255172	0.243094	0.185083	0.189227	0.030345	0.284138	0.543448	0.771034	0.994483	0.002759	0.143448	0.415172	0.691034	1	0.001379	0.311724	0.53931	0.764138	0.997241	0.495172	0.092414	0.412414	0.044199	0.058011	0.002762	0.001379	0.147586	0.391724	0.662069	1	0.131034	0.313103	0.515862	0.842759	0.90069	0.044138	0.306207	0.630345	0.787586	0.986207	0.438621	0.403315	0.008276	0.315862	0.533793	0.743448	0.986207	0.361379
0.453228	0.305665	0.241107	0.271768	0.224274	0.156992	0.013175	0.283267	0.474308	0.768116	0.998682	0.002635	0.26087	0.524374	0.783926	1	0.001318	0.188406	0.482213	0.699605	0.997365	0.513834	0.171278	0.314888	0.064644	0.077836	0.001319	0.001318	0.251647	0.549407	0.83004	1	0.006588	0.189723	0.382082	0.545455	0.747036	0.022398	0.272727	0.517787	0.732543	0.976285	0.345191	0.290237	0.00527	0.201581	0.399209	0.636364	0.997365	0.350461
0.388889	0.247475	0.363636	0.17952	0.307206	0.207332	0.006313	0.260101	0.536616	0.775253	1	0.005051	0.244949	0.460859	0.72601	0.994949	0.001263	0.234848	0.488636	0.741162	0.997475	0.477273	0.224747	0.29798	0.092288	0.059418	0.001264	0.001263	0.213384	0.450758	0.742424	1	0.041667	0.179293	0.429293	0.791667	0.997475	0.006313	0.329545	0.573232	0.75	0.991162	0.573232	0.389381	0.003788	0.268939	0.479798	0.734848	0.997475	0.277778
0.331226	0.384324	0.28445	0.264557	0.212658	0.218987	0.003793	0.235145	0.505689	0.764855	1	0.002528	0.216182	0.48799	0.740834	0.994943	0.001264	0.298357	0.506953	0.735777	0.997472	0.381795	0.109987	0.508217	0.035443	0.108861	0.002532	0.001264	0.283186	0.572693	0.816688	1	0.255373	0.453856	0.556258	0.879899	0.93426	0.020228	0.193426	0.402023	0.661188	0.997472	0.472819	0.417722	0.013906	0.288243	0.504425	0.709229	0.997472	0.4311
0.340659	0.395604	0.263736	0.355556	0.144444	0.2	0.043956	0.186813	0.43956	0.725275	1	0.021978	0.197802	0.516484	0.714286	0.989011	0.010989	0.32967	0.56044	0.747253	0.967033	0.593407	0.373626	0.032967	0.155556	0.022222	0	0.010989	0.142857	0.362637	0.593407	1	0.252747	0.395604	0.659341	0.769231	0.912088	0.945055	0.945055	0.945055	0.956044	0.967033	0.395604	0.333333	0.098901	0.384615	0.516484	0.67033	0.912088	0.406593
0.315315	0.418919	0.265766	0.270677	0.141353	0.190977	0.012012	0.193694	0.496997	0.779279	0.996997	0.003003	0.192192	0.426426	0.707207	1	0.001502	0.381381	0.564565	0.764264	0.986486	0.516517	0.138138	0.345345	0.055639	0.070677	0.007519	0.001502	0.186186	0.366366	0.684685	1	0.004505	0.430931	0.645646	0.8003	0.914414	0.01952	0.348348	0.564565	0.791291	0.996997	0.478979	0.336842	0.003003	0.381381	0.548048	0.764264	0.986486	0.435435
0.291762	0.429062	0.279176	0.262314	0.167239	0.239404	0.005721	0.24714	0.528604	0.772311	1	0.002288	0.273455	0.491991	0.749428	0.997712	0.001144	0.226545	0.482838	0.696796	0.998856	0.575515	0.114416	0.310069	0.04811	0.064147	0.004582	0.001144	0.265446	0.52746	0.757437	1	0.004577	0.138444	0.41762	0.59611	0.966819	0.049199	0.215103	0.5	0.726545	0.997712	0.456522	0.318442	0.004577	0.243707	0.5	0.718535	0.998856	0.467963
0.360406	0.390863	0.248731	0.260204	0.188776	0.183673	0.045685	0.203046	0.451777	0.695431	0.989848	0.010152	0.258883	0.57868	0.791878	1	0.005076	0.213198	0.441624	0.639594	0.984772	0.598985	0.182741	0.218274	0.061224	0.040816	0	0.005076	0.269036	0.634518	0.80203	1	0.025381	0.441624	0.527919	0.675127	0.908629	0.096447	0.142132	0.19797	0.416244	0.614213	0.360406	0.326531	0.040609	0.35533	0.538071	0.86802	0.984772	0.390863
0.27451	0.502451	0.223039	0.238037	0.11411	0.213497	0.002451	0.259804	0.48652	0.794118	1	0.003676	0.203431	0.457108	0.675245	0.998775	0.001225	0.340686	0.604167	0.792892	0.997549	0.682598	0.171569	0.145833	0.077301	0.040491	0.003681	0.001225	0.234069	0.498775	0.762255	1	0.04902	0.468137	0.632353	0.785539	0.991422	0.082108	0.214461	0.269608	0.405637	0.944853	0.457108	0.33865	0.01348	0.22549	0.534314	0.713235	0.992647	0.471814
0.300781	0.355469	0.34375	0.203922	0.211765	0.254902	0.007812	0.226562	0.507812	0.773438	0.988281	0.011719	0.273438	0.519531	0.710938	1	0.003906	0.234375	0.453125	0.71875	0.992188	0.398438	0.1875	0.414062	0.054902	0.078431	0	0.003906	0.222656	0.519531	0.714844	1	0.113281	0.300781	0.378906	0.597656	0.695312	0.011719	0.242188	0.496094	0.8125	0.992188	0.550781	0.4	0.019531	0.222656	0.464844	0.664062	0.992188	0.390625
0.21097	0.565401	0.223629	0.207627	0.09322	0.224576	0.016878	0.248945	0.396624	0.565401	1	0.021097	0.274262	0.590717	0.780591	0.983122	0.004219	0.202532	0.438819	0.628692	0.995781	0.759494	0.135021	0.105485	0.067797	0.033898	0	0.004219	0.341772	0.607595	0.810127	1	0.139241	0.253165	0.312236	0.409283	0.561181	0.084388	0.198312	0.223629	0.362869	0.751055	0.544304	0.305085	0.008439	0.375527	0.64557	0.793249	0.978903	0.527426
0.290909	0.384848	0.324242	0.203647	0.221884	0.221884	0.009091	0.242424	0.445455	0.736364	0.981818	0.012121	0.272727	0.478788	0.748485	0.99697	0.00303	0.221212	0.551515	0.760606	1	0.369697	0.160606	0.469697	0.045593	0.100304	0.00304	0.00303	0.215152	0.50303	0.745455	1	0.154545	0.284848	0.521212	0.70303	0.784848	0.015152	0.245455	0.487879	0.833333	0.990909	0.518182	0.401216	0.021212	0.236364	0.527273	0.69697	0.984848	0.381818
0.319048	0.37619	0.304762	0.248804	0.181818	0.205742	0.009524	0.219048	0.509524	0.766667	0.995238	0.02381	0.242857	0.433333	0.680952	1	0.004762	0.195238	0.585714	0.809524	0.980952	0.533333	0.152381	0.314286	0.076555	0.066986	0	0.004762	0.257143	0.4	0.695238	1	0.014286	0.080952	0.590476	0.747619	0.92381	0.109524	0.209524	0.566667	0.790476	0.980952	0.509524	0.373206	0.019048	0.319048	0.519048	0.752381	0.980952	0.37619
0.408696	0.295652	0.295652	0.280702	0.184211	0.175439	0.026087	0.147826	0.356522	0.66087	1	0.017391	0.226087	0.573913	0.8	0.973913	0.008696	0.365217	0.530435	0.791304	0.982609	0.530435	0.382609	0.086957	0.096491	0.026316	0.026316	0.008696	0.130435	0.382609	0.678261	1	0.321739	0.443478	0.582609	0.808696	0.973913	0.234783	0.243478	0.269565	0.286957	0.947826	0.443478	0.22807	0.234783	0.426087	0.556522	0.826087	0.982609	0.313043
0.485537	0.245868	0.268595	0.244306	0.26501	0.140787	0.004132	0.254132	0.508264	0.716942	0.989669	0.006198	0.27686	0.553719	0.809917	0.993802	0.002066	0.188017	0.433884	0.752066	1	0.504132	0.128099	0.367769	0.060041	0.076605	0.00207	0.002066	0.402893	0.628099	0.807851	1	0.012397	0.105372	0.328512	0.433884	0.882231	0.008264	0.216942	0.382231	0.652893	0.985537	0.365702	0.430642	0.008264	0.192149	0.392562	0.727273	0.971074	0.297521
0.516854	0.235955	0.247191	0.220339	0.231638	0.135593	0.022472	0.303371	0.550562	0.808989	0.988764	0.011236	0.191011	0.432584	0.719101	1	0.005618	0.174157	0.410112	0.657303	0.994382	0.353933	0.095506	0.550562	0.045198	0.101695	0	0.005618	0.08427	0.460674	0.769663	1	0.404494	0.421348	0.44382	0.483146	0.870787	0.117978	0.264045	0.567416	0.758427	0.977528	0.410112	0.440678	0.039326	0.224719	0.432584	0.606742	0.960674	0.230337
0.341463	0.317073	0.341463	0.208889	0.244444	0.197778	0.004435	0.277162	0.485588	0.736142	0.995565	0.011086	0.266075	0.529933	0.762749	1	0.002217	0.210643	0.454545	0.738359	0.991131	0.392461	0.119734	0.487805	0.053333	0.084444	0	0.002217	0.379157	0.572062	0.773836	1	0.416851	0.583149	0.745011	0.91796	0.993348	0.013304	0.168514	0.332594	0.611973	0.906874	0.585366	0.337778	0.008869	0.235033	0.494457	0.700665	0.988914	0.345898
0.289855	0.415459	0.294686	0.228155	0.126214	0.276699	0.043478	0.323671	0.560386	0.768116	1	0.009662	0.207729	0.42029	0.714976	0.995169	0.004831	0.193237	0.512077	0.710145	0.971014	0.565217	0.256039	0.178744	0.097087	0.038835	0.009709	0.004831	0.154589	0.362319	0.550725	1	0.024155	0.275362	0.657005	0.772947	0.966184	0.415459	0.57971	0.623188	0.884058	0.980676	0.468599	0.407767	0.024155	0.275362	0.497585	0.772947	0.971014	0.449275
0.380645	0.322581	0.296774	0.230603	0.256466	0.18319	0.008602	0.283871	0.522581	0.772043	0.963441	0.015054	0.24086	0.47957	0.733333	0.997849	0.002151	0.217204	0.494624	0.737634	1	0.354839	0.083871	0.56129	0.032328	0.092672	0.002155	0.002151	0.286022	0.537634	0.789247	1	0.210753	0.27957	0.395699	0.516129	0.597849	0.004301	0.178495	0.486022	0.731183	0.954839	0.541935	0.405172	0.006452	0.260215	0.48172	0.703226	0.995699	0.412903
0.340479	0.30517	0.354351	0.195707	0.233586	0.214646	0.003783	0.240858	0.514502	0.774275	0.998739	0.002522	0.250946	0.471627	0.709962	1	0.001261	0.258512	0.509458	0.759142	0.997478	0.319042	0.025221	0.655738	0.011364	0.082071	0.003788	0.001261	0.238335	0.390921	0.663304	1	0.363178	0.368222	0.542245	0.762926	0.789407	0.032787	0.244641	0.527112	0.781841	0.997478	0.544767	0.376263	0.025221	0.262295	0.481715	0.741488	0.994956	0.319042
0.405303	0.367424	0.227273	0.288973	0.18251	0.171103	0.011364	0.291667	0.503788	0.772727	0.996212	0.007576	0.234848	0.560606	0.806818	1	0.003788	0.17803	0.382576	0.575758	0.901515	0.640152	0.121212	0.238636	0.038023	0.053232	0.007605	0.003788	0.227273	0.617424	0.837121	1	0.079545	0.375	0.431818	0.541667	0.666667	0.007576	0.284091	0.344697	0.575758	0.734848	0.439394	0.34981	0.015152	0.185606	0.435606	0.651515	0.992424	0.397727
0.400545	0.39782	0.201635	0.336066	0.155738	0.163934	0.008174	0.215259	0.463215	0.711172	0.989101	0.00545	0.280654	0.493188	0.752044	1	0.002725	0.258856	0.574932	0.803815	0.991826	0.675749	0.019074	0.305177	0.027322	0.114754	0	0.002725	0.27248	0.46594	0.754768	1	0.242507	0.242507	0.784741	0.858311	0.948229	0.065395	0.174387	0.594005	0.730245	0.901907	0.277929	0.36612	0.06267	0.27248	0.588556	0.790191	0.991826	0.452316
0.316964	0.379464	0.303571	0.215247	0.188341	0.273543	0.035714	0.1875	0.522321	0.763393	0.995536	0.008929	0.227679	0.441964	0.727679	1	0.004464	0.272321	0.508929	0.732143	0.96875	0.598214	0.147321	0.254464	0.044843	0.053812	0	0.004464	0.147321	0.361607	0.598214	1	0.236607	0.5625	0.732143	0.785714	0.9375	0.299107	0.388393	0.625	0.6875	0.955357	0.441964	0.313901	0.102679	0.379464	0.5625	0.732143	0.982143	0.361607
0.407407	0.385185	0.207407	0.313433	0.179104	0.11194	0.044444	0.274074	0.592593	0.77037	0.992593	0.014815	0.22963	0.459259	0.807407	1	0.007407	0.148148	0.311111	0.548148	0.762963	0.540741	0.437037	0.022222	0.149254	0.014925	0	0.007407	0.340741	0.622222	0.837037	1	0.014815	0.148148	0.355556	0.555556	0.77037	0.844444	0.844444	0.844444	0.851852	0.859259	0.348148	0.402985	0.014815	0.17037	0.4	0.585185	0.859259	0.437037
0.332226	0.421927	0.245847	0.32	0.163333	0.16	0.006645	0.23588	0.511628	0.76412	1	0.013289	0.245847	0.465116	0.770764	0.996678	0.003322	0.225914	0.518272	0.657807	0.966777	0.581395	0.106312	0.312292	0.06	0.073333	0	0.003322	0.245847	0.501661	0.777409	1	0.016611	0.053156	0.418605	0.528239	0.657807	0.079734	0.365449	0.554817	0.717608	0.990033	0.495017	0.326667	0.016611	0.285714	0.498339	0.757475	0.966777	0.458472
0.445545	0.237624	0.316832	0.22	0.3	0.12	0.019802	0.287129	0.49505	0.792079	0.990099	0.029703	0.19802	0.50495	0.752475	0.970297	0.009901	0.247525	0.455446	0.712871	1	0.405941	0.594059	0	0.2	0	0	0.009901	0.207921	0.50495	0.742574	1	0.029703	0.247525	0.445545	0.722772	0.990099	0	0	0	0	0	0.445545	0.32	0.049505	0.257426	0.455446	0.683168	0.930693	0.277228
0.312925	0.37415	0.312925	0.225256	0.204778	0.242321	0.010204	0.190476	0.5	0.744898	0.996599	0.006803	0.285714	0.486395	0.734694	1	0.003401	0.231293	0.537415	0.765306	0.993197	0.452381	0.238095	0.309524	0.088737	0.081911	0.013652	0.003401	0.227891	0.455782	0.693878	1	0.030612	0.210884	0.380952	0.489796	0.996599	0.085034	0.323129	0.690476	0.880952	0.972789	0.527211	0.354949	0.034014	0.309524	0.486395	0.714286	0.989796	0.391156
0.34492	0.262032	0.393048	0.168901	0.262735	0.22252	0.008021	0.205882	0.47861	0.745989	1	0.005348	0.256684	0.524064	0.735294	0.991979	0.002674	0.26738	0.516043	0.740642	0.994652	0.275401	0.181818	0.542781	0.058981	0.053619	0.021448	0.002674	0.259358	0.435829	0.794118	1	0.058824	0.360963	0.516043	0.820856	0.935829	0.010695	0.165775	0.5	0.673797	0.991979	0.502674	0.434316	0.010695	0.237968	0.441176	0.71123	0.989305	0.197861
0.285211	0.419014	0.295775	0.226148	0.169611	0.250883	0.010563	0.21831	0.447183	0.757042	0.989437	0.007042	0.239437	0.475352	0.760563	1	0.003521	0.257042	0.507042	0.721831	0.996479	0.390845	0.172535	0.43662	0.04947	0.09894	0	0.003521	0.190141	0.454225	0.704225	1	0.169014	0.323944	0.443662	0.644366	0.735915	0.021127	0.232394	0.528169	0.834507	0.996479	0.538732	0.416961	0.017606	0.235915	0.475352	0.661972	0.996479	0.457746
0.30814	0.383721	0.30814	0.251462	0.187135	0.216374	0.011628	0.174419	0.395349	0.715116	1	0.034884	0.290698	0.540698	0.755814	0.994186	0.005814	0.203488	0.5	0.703488	0.988372	0.348837	0.232558	0.418605	0.093567	0.081871	0.011696	0.005814	0.244186	0.453488	0.697674	1	0.087209	0.186047	0.267442	0.540698	0.627907	0.052326	0.354651	0.709302	0.843023	0.988372	0.552326	0.421053	0.063953	0.30814	0.552326	0.72093	0.988372	0.412791
0.408163	0.251701	0.340136	0.239726	0.287671	0.157534	0.013605	0.285714	0.47619	0.707483	1	0.068027	0.176871	0.469388	0.721088	0.993197	0.006803	0.204082	0.517007	0.768707	0.972789	0.367347	0.29932	0.333333	0.109589	0.068493	0.013699	0.006803	0.14966	0.510204	0.741497	1	0.013605	0.244898	0.619048	0.891156	0.986395	0.061224	0.326531	0.408163	0.489796	0.816327	0.380952	0.452055	0.020408	0.204082	0.537415	0.727891	0.972789	0.278912
0.316113	0.364084	0.319803	0.237685	0.23399	0.225369	0.00246	0.259533	0.531365	0.773678	1	0.00492	0.238622	0.463715	0.712177	0.99754	0.00123	0.255843	0.512915	0.769988	0.99877	0.464945	0.239852	0.295203	0.096059	0.059113	0.002463	0.00123	0.230012	0.478475	0.738007	1	0.04182	0.198032	0.415744	0.801968	0.99877	0.00615	0.319803	0.570726	0.706027	0.99262	0.564576	0.399015	0.00369	0.258303	0.468635	0.742927	0.99877	0.383764
0.342105	0.37218	0.285714	0.25283	0.2	0.188679	0.007519	0.240602	0.507519	0.781955	0.988722	0.011278	0.225564	0.496241	0.759398	1	0.003759	0.278195	0.469925	0.661654	0.966165	0.413534	0.078947	0.507519	0.030189	0.090566	0	0.003759	0.109023	0.451128	0.75188	1	0.473684	0.774436	0.819549	0.838346	0.868421	0.052632	0.296992	0.458647	0.642857	0.954887	0.466165	0.34717	0.030075	0.278195	0.466165	0.650376	0.947368	0.424812
0.35461	0.248227	0.397163	0.192857	0.271429	0.178571	0.021277	0.205674	0.48227	0.723404	1	0.035461	0.35461	0.510638	0.702128	0.985816	0.007092	0.163121	0.475177	0.758865	0.978723	0.319149	0.148936	0.531915	0.05	0.092857	0.007143	0.007092	0.319149	0.446809	0.751773	1	0.120567	0.390071	0.48227	0.51773	0.787234	0.021277	0.184397	0.567376	0.702128	0.971631	0.489362	0.414286	0.021277	0.191489	0.510638	0.716312	0.971631	0.205674
0.381089	0.372493	0.246418	0.247126	0.16092	0.201149	0.008596	0.234957	0.444126	0.716332	0.991404	0.005731	0.157593	0.446991	0.724928	0.997135	0.002865	0.378223	0.567335	0.782235	1	0.481375	0.22063	0.297994	0.063218	0.057471	0.005747	0.002865	0.140401	0.432665	0.719198	1	0.409742	0.60745	0.802292	0.876791	0.994269	0.071633	0.206304	0.312321	0.495702	0.762178	0.424069	0.287356	0.04298	0.446991	0.627507	0.805158	0.994269	0.366762
0.568465	0.248963	0.182573	0.291667	0.1875	0.075	0.012448	0.377593	0.589212	0.788382	1	0.008299	0.190871	0.452282	0.755187	0.995851	0.004149	0.107884	0.273859	0.390041	0.929461	0.572614	0.124481	0.302905	0.05	0.1	0.008333	0.004149	0.410788	0.659751	0.813278	1	0.016598	0.041494	0.186722	0.236515	0.817427	0.053942	0.26556	0.348548	0.485477	0.962656	0.219917	0.208333	0.016598	0.112033	0.244813	0.3361	0.825726	0.240664
0.387097	0.38172	0.231183	0.2	0.227027	0.145946	0.010753	0.177419	0.424731	0.591398	1	0.043011	0.317204	0.55914	0.768817	0.994624	0.005376	0.258065	0.586022	0.822581	0.978495	0.596774	0.043011	0.360215	0.027027	0.081081	0.005405	0.005376	0.290323	0.44086	0.801075	1	0.268817	0.274194	0.72043	0.833333	0.844086	0.032258	0.177419	0.483871	0.586022	0.978495	0.344086	0.410811	0.026882	0.258065	0.564516	0.795699	0.978495	0.419355
0.318428	0.375339	0.306233	0.225237	0.204885	0.257802	0.00271	0.239837	0.468835	0.742547	1	0.00813	0.234417	0.498645	0.757453	0.99458	0.001355	0.283198	0.525745	0.739837	0.99729	0.485095	0.109756	0.405149	0.061058	0.080054	0.001357	0.001355	0.288618	0.574526	0.795393	1	0.135501	0.227642	0.542005	0.753388	0.95664	0.023035	0.241192	0.394309	0.659892	0.993225	0.487805	0.474898	0.004065	0.260163	0.52439	0.772358	0.99729	0.415989
0.361233	0.374449	0.264317	0.286976	0.183223	0.181015	0.008811	0.312775	0.537445	0.797357	1	0.004405	0.202643	0.559471	0.779736	0.997797	0.002203	0.237885	0.389868	0.640969	0.951542	0.493392	0.160793	0.345815	0.06181	0.07064	0.004415	0.002203	0.314978	0.645374	0.876652	1	0.090308	0.286344	0.486784	0.656388	0.768722	0.006608	0.19163	0.376652	0.588106	0.854626	0.508811	0.317881	0.006608	0.200441	0.398678	0.640969	0.852423	0.387665
0.434211	0.236842	0.328947	0.198675	0.284768	0.198675	0.013158	0.269737	0.585526	0.822368	1	0.019737	0.157895	0.394737	0.657895	0.947368	0.006579	0.263158	0.453947	0.684211	0.973684	0.361842	0.335526	0.302632	0.10596	0.05298	0.013245	0.006579	0.25	0.434211	0.651316	1	0.019737	0.144737	0.348684	0.684211	0.789474	0.118421	0.532895	0.618421	0.894737	0.973684	0.460526	0.370861	0.026316	0.210526	0.407895	0.671053	0.953947	0.217105
0.419355	0.314516	0.266129	0.260163	0.186992	0.178862	0.016129	0.290323	0.540323	0.766129	1	0.040323	0.225806	0.435484	0.798387	0.991935	0.008065	0.193548	0.403226	0.629032	0.870968	0.483871	0.153226	0.362903	0.04878	0.065041	0	0.008065	0.241935	0.58871	0.879032	1	0.169355	0.193548	0.298387	0.33871	0.645161	0.040323	0.395161	0.483871	0.741935	0.83871	0.435484	0.276423	0.056452	0.298387	0.435484	0.620968	0.83871	0.387097
0.328704	0.351852	0.319444	0.176744	0.255814	0.213953	0.018519	0.259259	0.453704	0.722222	1	0.009259	0.171296	0.578704	0.796296	0.990741	0.00463	0.277778	0.458333	0.666667	0.986111	0.472222	0.407407	0.12037	0.111628	0.037209	0	0.00463	0.273148	0.564815	0.824074	1	0.023148	0.310185	0.481481	0.634259	0.861111	0.087963	0.111111	0.240741	0.657407	0.921296	0.425926	0.465116	0.027778	0.25463	0.453704	0.685185	0.986111	0.425926
0.401408	0.352113	0.246479	0.340426	0.184397	0.177305	0.021127	0.267606	0.507042	0.753521	0.985915	0.014085	0.232394	0.478873	0.746479	1	0.007042	0.21831	0.443662	0.65493	0.838028	0.239437	0.34507	0.415493	0.035461	0.078014	0.021277	0.007042	0.070423	0.359155	0.535211	1	0.098592	0.577465	0.661972	0.760563	0.852113	0.042254	0.253521	0.422535	0.56338	0.985915	0.429577	0.411348	0.105634	0.253521	0.457746	0.661972	0.929577	0.352113
0.385827	0.333071	0.281102	0.257683	0.22695	0.193065	0.007087	0.251181	0.491339	0.740157	1	0.001575	0.233071	0.514961	0.751969	0.998425	0.000787	0.258268	0.500787	0.751181	0.99685	0.414173	0.192126	0.393701	0.081166	0.08747	0.00394	0.000787	0.229921	0.520472	0.774803	1	0.00315	0.211024	0.43622	0.689764	0.969291	0.007087	0.284252	0.508661	0.755906	0.985039	0.414961	0.49015	0.00315	0.252756	0.50315	0.759843	0.99685	0.351969
0.330144	0.330144	0.339713	0.232614	0.247002	0.230216	0.014354	0.244019	0.483254	0.739234	0.997608	0.004785	0.241627	0.511962	0.755981	1	0.002392	0.258373	0.504785	0.712919	0.992823	0.394737	0.148325	0.456938	0.06235	0.091127	0.004796	0.002392	0.222488	0.538278	0.80622	1	0.08134	0.282297	0.516746	0.906699	0.961722	0.009569	0.244019	0.421053	0.669856	0.866029	0.569378	0.364508	0.009569	0.239234	0.452153	0.698565	0.992823	0.349282
0.322292	0.388541	0.289167	0.248208	0.194444	0.236559	0.002686	0.231871	0.451209	0.724261	0.993733	0.001791	0.234557	0.495971	0.733214	1	0.000895	0.29991	0.558639	0.784244	0.999105	0.57744	0.145031	0.277529	0.083333	0.068996	0.002688	0.000895	0.233662	0.519248	0.734109	1	0.025962	0.594449	0.711728	0.840645	0.999105	0.007162	0.185318	0.406446	0.574754	0.991047	0.489705	0.387097	0.007162	0.313339	0.576544	0.772605	0.997314	0.402865
0.323484	0.412131	0.264386	0.260125	0.165109	0.266355	0.00311	0.211509	0.438569	0.727838	1	0.006221	0.264386	0.513219	0.744946	0.99689	0.001555	0.261275	0.531882	0.77916	0.990669	0.525661	0.111975	0.362364	0.101246	0.095016	0.010903	0.001555	0.227061	0.438569	0.741835	1	0.066874	0.276827	0.528771	0.734059	0.970451	0.031104	0.311042	0.539658	0.755832	0.968896	0.342146	0.507788	0.018663	0.258165	0.517885	0.755832	0.987558	0.421462
0.380952	0.35119	0.267857	0.298507	0.18806	0.173134	0.008929	0.232143	0.517857	0.800595	1	0.005952	0.270833	0.508929	0.75	0.994048	0.002976	0.238095	0.443452	0.642857	0.97619	0.443452	0.172619	0.383929	0.080597	0.074627	0.002985	0.002976	0.247024	0.544643	0.803571	1	0.074405	0.202381	0.494048	0.642857	0.931548	0.008929	0.264881	0.46131	0.71131	0.982143	0.369048	0.4	0.014881	0.247024	0.443452	0.645833	0.985119	0.369048
0.347165	0.417704	0.235131	0.270083	0.171745	0.17867	0.008299	0.261411	0.547718	0.775934	1	0.011065	0.26971	0.525588	0.757953	0.998617	0.001383	0.211618	0.392808	0.69018	0.991701	0.759336	0.107884	0.13278	0.044321	0.044321	0.00277	0.001383	0.304288	0.550484	0.780083	1	0.002766	0.215768	0.319502	0.576763	0.858921	0.058091	0.192254	0.298755	0.687414	0.959889	0.392808	0.357341	0.002766	0.211618	0.417704	0.596127	0.97787	0.42462
0.319319	0.415415	0.265265	0.226453	0.182365	0.194389	0.002002	0.247247	0.556557	0.790791	0.994995	0.003003	0.242242	0.444444	0.731732	0.997998	0.001001	0.248248	0.510511	0.713714	1	0.593594	0.052052	0.354354	0.034068	0.074148	0.006012	0.001001	0.301301	0.484484	0.78979	1	0.132132	0.4004	0.538539	0.774775	0.952953	0.038038	0.218218	0.513514	0.714715	0.992993	0.407407	0.380762	0.004004	0.245245	0.437437	0.705706	0.996997	0.428428
0.249012	0.442688	0.3083	0.206349	0.162698	0.261905	0.031621	0.256917	0.529644	0.758893	1	0.007905	0.213439	0.478261	0.774704	0.996047	0.003953	0.26087	0.474308	0.695652	0.988142	0.418972	0.189723	0.391304	0.055556	0.087302	0	0.003953	0.217391	0.537549	0.853755	1	0.142292	0.316206	0.395257	0.608696	0.70751	0.027668	0.205534	0.490119	0.790514	0.913043	0.525692	0.373016	0.043478	0.237154	0.442688	0.624506	0.988142	0.422925
0.336134	0.361345	0.302521	0.237288	0.220339	0.220339	0.042017	0.268908	0.596639	0.789916	0.991597	0.02521	0.226891	0.445378	0.731092	0.915966	0.008403	0.252101	0.403361	0.689076	1	0.512605	0.142857	0.344538	0.067797	0.084746	0	0.008403	0.310924	0.714286	0.840336	1	0.02521	0.117647	0.151261	0.184874	0.991597	0.226891	0.302521	0.478992	0.613445	0.705882	0.436975	0.491525	0.016807	0.176471	0.403361	0.705882	0.983193	0.302521
0.35473	0.572635	0.072635	0.351946	0.05753	0.052453	0.005068	0.233108	0.447635	0.689189	0.996622	0.003378	0.228041	0.552365	0.790541	1	0.001689	0.407095	0.486486	0.548986	0.974662	0.902027	0.050676	0.047297	0.027073	0.013536	0	0.001689	0.239865	0.547297	0.773649	1	0.059122	0.403716	0.461149	0.488176	0.628378	0.14527	0.157095	0.427365	0.5	0.511824	0.570946	0.368866	0.011824	0.293919	0.554054	0.798986	0.996622	0.569257
0.411765	0.309598	0.278638	0.26087	0.267081	0.167702	0.009288	0.244582	0.50774	0.798762	0.996904	0.006192	0.272446	0.473684	0.696594	0.96904	0.003096	0.232198	0.501548	0.721362	1	0.448916	0.151703	0.399381	0.055901	0.068323	0	0.003096	0.417957	0.640867	0.764706	1	0.099071	0.145511	0.393189	0.55418	0.869969	0.012384	0.20743	0.365325	0.795666	0.990712	0.396285	0.416149	0.021672	0.226006	0.408669	0.55418	0.98452	0.417957
0.369748	0.302521	0.327731	0.211864	0.254237	0.177966	0.033613	0.252101	0.529412	0.689076	1	0.016807	0.201681	0.403361	0.705882	0.966387	0.008403	0.277311	0.554622	0.789916	0.983193	0.352941	0.151261	0.495798	0.042373	0.076271	0.008475	0.008403	0.084034	0.285714	0.420168	1	0.310924	0.336134	0.453782	0.756303	0.798319	0.109244	0.487395	0.613445	0.848739	0.983193	0.462185	0.355932	0.058824	0.361345	0.579832	0.764706	0.983193	0.294118
0.376494	0.340637	0.282869	0.225549	0.213573	0.217565	0.003984	0.227092	0.51992	0.75498	0.994024	0.011952	0.260956	0.505976	0.729084	0.988048	0.001992	0.23506	0.464143	0.739044	1	0.511952	0.205179	0.282869	0.083832	0.051896	0	0.001992	0.241036	0.50996	0.798805	1	0.02988	0.173307	0.38247	0.59761	0.996016	0.053785	0.304781	0.569721	0.772908	0.98008	0.496016	0.335329	0.027888	0.268924	0.543825	0.800797	0.978088	0.344622
0.34058	0.362319	0.297101	0.243194	0.210526	0.219601	0.005435	0.255435	0.536232	0.797101	0.996377	0.003623	0.28442	0.528986	0.778986	1	0.001812	0.184783	0.427536	0.630435	0.992754	0.467391	0.063406	0.469203	0.019964	0.07804	0.005445	0.001812	0.26087	0.641304	0.824275	1	0.056159	0.068841	0.186594	0.373188	0.615942	0.005435	0.29529	0.461957	0.652174	0.994565	0.496377	0.315789	0.007246	0.217391	0.45471	0.625	0.992754	0.418478
0.33	0.31	0.36	0.262626	0.252525	0.222222	0.07	0.26	0.55	0.81	1	0.03	0.17	0.38	0.71	0.98	0.01	0.27	0.49	0.7	0.97	0.4	0.34	0.26	0.090909	0.050505	0.010101	0.01	0.16	0.38	0.61	1	0.09	0.41	0.54	0.68	0.96	0.19	0.24	0.73	0.79	0.89	0.46	0.464646	0.04	0.19	0.53	0.71	0.95	0.32
0.315855	0.314607	0.369538	0.16625	0.25625	0.2475	0.006242	0.282147	0.526841	0.762797	0.998752	0.004994	0.23221	0.478152	0.736579	1	0.001248	0.230961	0.483146	0.745318	0.997503	0.475655	0.227216	0.297129	0.08875	0.05875	0.00625	0.001248	0.214732	0.453184	0.742821	1	0.03995	0.173533	0.414482	0.805243	0.997503	0.006242	0.343321	0.569288	0.732834	0.991261	0.570537	0.395	0.003745	0.260924	0.469413	0.736579	0.997503	0.333333
0.345638	0.295302	0.35906	0.198653	0.259259	0.239057	0.013423	0.234899	0.432886	0.758389	0.989933	0.026846	0.244966	0.567114	0.738255	0.996644	0.003356	0.241611	0.483221	0.721477	1	0.392617	0.157718	0.449664	0.057239	0.117845	0.003367	0.003356	0.174497	0.419463	0.684564	1	0.010067	0.268456	0.442953	0.637584	0.721477	0.026846	0.298658	0.536913	0.828859	0.989933	0.54698	0.397306	0.006711	0.244966	0.473154	0.671141	0.983221	0.332215
0.442308	0.427885	0.129808	0.415459	0.111111	0.10628	0.014423	0.269231	0.514423	0.716346	1	0.009615	0.307692	0.581731	0.807692	0.990385	0.004808	0.100962	0.192308	0.326923	0.947115	0.759615	0.129808	0.110577	0.048309	0.048309	0	0.004808	0.413462	0.605769	0.802885	1	0.014423	0.139423	0.1875	0.307692	0.341346	0.072115	0.091346	0.216346	0.245192	0.879808	0.278846	0.318841	0.019231	0.158654	0.322115	0.673077	0.961538	0.466346
0.270833	0.388889	0.340278	0.230769	0.132867	0.258741	0.020833	0.256944	0.534722	0.666667	0.958333	0.013889	0.215278	0.416667	0.791667	0.979167	0.006944	0.263889	0.465278	0.743056	1	0.583333	0.368056	0.048611	0.195804	0.027972	0	0.006944	0.166667	0.4375	0.777778	1	0.111111	0.277778	0.472222	0.638889	0.993056	0.881944	0.881944	0.895833	0.9375	0.951389	0.527778	0.321678	0.111111	0.284722	0.555556	0.75	0.972222	0.375
0.459916	0.232068	0.308017	0.211864	0.292373	0.161017	0.012658	0.248945	0.489451	0.751055	1	0.008439	0.261603	0.438819	0.662447	0.995781	0.004219	0.21519	0.523207	0.767932	0.978903	0.362869	0.177215	0.459916	0.04661	0.072034	0.004237	0.004219	0.206751	0.35443	0.7173	1	0.016878	0.080169	0.160338	0.248945	0.734177	0.362869	0.493671	0.628692	0.801688	0.974684	0.333333	0.466102	0.033755	0.244726	0.514768	0.742616	0.978903	0.265823
0.22449	0.462585	0.312925	0.205479	0.136986	0.287671	0.034014	0.217687	0.346939	0.496599	0.986395	0.013605	0.367347	0.659864	0.85034	0.993197	0.006803	0.197279	0.442177	0.612245	1	0.632653	0.312925	0.054422	0.061644	0.020548	0.006849	0.006803	0.37415	0.680272	0.836735	1	0.088435	0.183673	0.29932	0.44898	0.557823	0.020408	0.027211	0.040816	0.489796	0.503401	0.612245	0.315068	0.040816	0.251701	0.52381	0.727891	0.979592	0.462585
0.254902	0.511765	0.233333	0.227898	0.129666	0.206287	0.015686	0.207843	0.427451	0.727451	0.996078	0.005882	0.288235	0.562745	0.74902	1	0.001961	0.231373	0.464706	0.713725	0.998039	0.631373	0.133333	0.235294	0.05501	0.047151	0.003929	0.001961	0.25098	0.498039	0.698039	1	0.098039	0.166667	0.372549	0.837255	0.937255	0.013725	0.392157	0.641176	0.878431	0.988235	0.511765	0.369352	0.005882	0.307843	0.564706	0.72549	0.992157	0.509804
0.370871	0.333333	0.295796	0.245113	0.21203	0.209023	0.004505	0.243243	0.496997	0.750751	0.998498	0.006006	0.192192	0.441441	0.734234	0.992492	0.001502	0.325826	0.533033	0.749249	1	0.509009	0.124625	0.366366	0.039098	0.07218	0.009023	0.001502	0.13964	0.34985	0.737237	1	0.024024	0.405405	0.569069	0.684685	0.795796	0.013514	0.373874	0.558559	0.812312	0.947447	0.495495	0.345865	0.006006	0.301802	0.483483	0.726727	0.992492	0.34985
0.322624	0.46988	0.207497	0.266756	0.146113	0.206434	0.002677	0.263722	0.538153	0.795181	0.998661	0.004016	0.243641	0.497992	0.742972	1	0.001339	0.238286	0.444444	0.717537	0.994645	0.67336	0.10174	0.2249	0.037534	0.050938	0.002681	0.001339	0.246319	0.503347	0.738956	1	0.065596	0.219545	0.321285	0.757697	0.840696	0.088353	0.30656	0.682731	0.84739	0.995984	0.468541	0.33244	0.01071	0.219545	0.443106	0.605087	0.994645	0.453815
0.364379	0.349673	0.285948	0.216039	0.198036	0.225859	0.009804	0.19281	0.45098	0.727124	1	0.006536	0.267974	0.485294	0.735294	0.998366	0.001634	0.346405	0.54902	0.767974	0.99183	0.612745	0.199346	0.187908	0.086743	0.040917	0.008183	0.001634	0.230392	0.455882	0.699346	1	0.003268	0.220588	0.53268	0.76634	0.978758	0.062092	0.401961	0.573529	0.79085	0.955882	0.485294	0.356792	0.004902	0.218954	0.441176	0.736928	0.986928	0.362745
0.308017	0.379747	0.312236	0.254237	0.152542	0.245763	0.008439	0.202532	0.510549	0.767932	0.995781	0.050633	0.291139	0.506329	0.763713	0.987342	0.004219	0.232068	0.42616	0.662447	1	0.341772	0.092827	0.565401	0.042373	0.110169	0	0.004219	0.156118	0.438819	0.78481	1	0.43038	0.763713	0.818565	0.839662	0.987342	0.021097	0.253165	0.455696	0.611814	0.957806	0.493671	0.338983	0.029536	0.236287	0.438819	0.675105	0.991561	0.371308
0.292614	0.465909	0.241477	0.290598	0.136752	0.188034	0.008523	0.258523	0.522727	0.801136	0.997159	0.005682	0.184659	0.392045	0.639205	0.991477	0.002841	0.40625	0.616477	0.786932	1	0.616477	0.215909	0.167614	0.068376	0.034188	0.005698	0.002841	0.153409	0.306818	0.605114	1	0.329545	0.428977	0.622159	0.821023	0.977273	0.494318	0.596591	0.715909	0.84375	0.903409	0.596591	0.358974	0.017045	0.247159	0.528409	0.730114	0.977273	0.471591
0.346939	0.318367	0.334694	0.221311	0.258197	0.204918	0.008163	0.212245	0.453061	0.75102	1	0.028571	0.24898	0.502041	0.734694	0.991837	0.004082	0.261224	0.510204	0.714286	0.983673	0.4	0.183673	0.416327	0.069672	0.094262	0.004098	0.004082	0.155102	0.383673	0.689796	1	0.044898	0.232653	0.497959	0.628571	0.722449	0.061224	0.277551	0.571429	0.828571	0.983673	0.57551	0.434426	0.028571	0.240816	0.465306	0.677551	0.983673	0.257143
0.346908	0.315234	0.337858	0.21148	0.238671	0.234139	0.003017	0.269985	0.552036	0.775264	0.996983	0.004525	0.199095	0.434389	0.707391	1	0.001508	0.28356	0.514329	0.745098	0.998492	0.411765	0.162896	0.425339	0.070997	0.070997	0.004532	0.001508	0.26546	0.496229	0.822021	1	0.003017	0.182504	0.377074	0.886878	0.998492	0.027149	0.248869	0.527903	0.671192	0.924585	0.544495	0.392749	0.004525	0.250377	0.475113	0.711916	0.998492	0.33635
0.452632	0.178947	0.368421	0.180851	0.319149	0.095745	0.021053	0.221053	0.442105	0.736842	1	0.042105	0.168421	0.463158	0.610526	0.863158	0.010526	0.231579	0.505263	0.789474	0.957895	0.305263	0.326316	0.368421	0.085106	0.06383	0.021277	0.010526	0.147368	0.452632	0.6	1	0.042105	0.105263	0.505263	0.652632	0.968421	0.168421	0.242105	0.336842	0.8	0.926316	0.484211	0.425532	0.042105	0.231579	0.515789	0.705263	0.957895	0.2
0.356842	0.358947	0.284211	0.231823	0.199157	0.195996	0.008421	0.227368	0.451579	0.734737	1	0.002105	0.275789	0.548421	0.788421	0.996842	0.001053	0.24	0.424211	0.72	0.998947	0.581053	0.090526	0.328421	0.045311	0.062171	0.001054	0.001053	0.307368	0.612632	0.842105	1	0.033684	0.203158	0.321053	0.683158	0.810526	0.003158	0.173684	0.390526	0.566316	0.942105	0.524211	0.362487	0.003158	0.243158	0.522105	0.758947	0.996842	0.385263
0.463087	0.362416	0.174497	0.364865	0.162162	0.128378	0.020134	0.268456	0.503356	0.718121	0.993289	0.013423	0.308725	0.516779	0.765101	1	0.006711	0.114094	0.295302	0.731544	0.95302	0.348993	0.040268	0.610738	0.02027	0.141892	0.006757	0.006711	0.248322	0.489933	0.765101	1	0.147651	0.147651	0.161074	0.33557	0.348993	0.033557	0.255034	0.57047	0.738255	0.973154	0.33557	0.432432	0.026846	0.194631	0.583893	0.731544	0.95302	0.416107
0.424556	0.318047	0.257396	0.266667	0.182222	0.174815	0.004438	0.16716	0.525148	0.77071	1	0.002959	0.247041	0.461538	0.744083	0.992604	0.001479	0.307692	0.498521	0.720414	0.997041	0.507396	0.130178	0.362426	0.042963	0.084444	0.004444	0.001479	0.150888	0.52071	0.761834	1	0.122781	0.329882	0.470414	0.678994	0.997041	0.094675	0.279586	0.498521	0.775148	0.926036	0.442308	0.331852	0.079882	0.273669	0.451183	0.701183	0.997041	0.356509
0.346304	0.451362	0.202335	0.269531	0.140625	0.167969	0.011673	0.256809	0.490272	0.766537	1	0.007782	0.303502	0.548638	0.801556	0.996109	0.003891	0.124514	0.420233	0.603113	0.856031	0.470817	0.151751	0.377432	0.070312	0.085938	0	0.003891	0.29572	0.513619	0.836576	1	0.015564	0.124514	0.175097	0.276265	0.828794	0.062257	0.412451	0.622568	0.731518	0.980545	0.396887	0.335938	0.019455	0.206226	0.420233	0.634241	0.964981	0.466926
0.360656	0.344262	0.295082	0.240132	0.220395	0.223684	0.019672	0.288525	0.521311	0.790164	0.996721	0.006557	0.17377	0.44918	0.714754	1	0.003279	0.268852	0.514754	0.737705	0.990164	0.42623	0.413115	0.160656	0.108553	0.055921	0.016447	0.003279	0.229508	0.504918	0.754098	1	0.101639	0.272131	0.527869	0.727869	0.977049	0.039344	0.07541	0.354098	0.622951	0.901639	0.455738	0.401316	0.04918	0.272131	0.481967	0.727869	0.990164	0.35082
0.311475	0.459016	0.229508	0.249315	0.150685	0.208219	0.005464	0.251366	0.461749	0.79235	0.994536	0.008197	0.259563	0.581967	0.748634	1	0.002732	0.221311	0.418033	0.631148	0.95082	0.860656	0.035519	0.103825	0.016438	0.038356	0.005479	0.002732	0.275956	0.540984	0.756831	1	0.016393	0.021858	0.297814	0.39071	0.885246	0.106557	0.139344	0.191257	0.461749	0.986339	0.363388	0.361644	0.008197	0.18306	0.47541	0.713115	0.980874	0.486339
0.346361	0.361186	0.292453	0.240216	0.180837	0.225371	0.004043	0.219677	0.508086	0.799191	0.998652	0.002695	0.226415	0.478437	0.718329	1	0.001348	0.304582	0.5	0.725067	0.997305	0.486523	0.122642	0.390836	0.044534	0.08502	0.004049	0.001348	0.136119	0.393531	0.690027	1	0.009434	0.339623	0.501348	0.656334	0.91779	0.030997	0.361186	0.59434	0.836927	0.995957	0.478437	0.334683	0.008086	0.281671	0.475741	0.722372	0.997305	0.374663
0.376645	0.320724	0.302632	0.230643	0.248764	0.181219	0.004934	0.225329	0.427632	0.725329	1	0.003289	0.305921	0.527961	0.753289	0.995066	0.001645	0.220395	0.557566	0.758224	0.996711	0.462171	0.131579	0.40625	0.051071	0.103789	0.001647	0.001645	0.335526	0.5625	0.805921	1	0.164474	0.268092	0.675987	0.810855	0.929276	0.006579	0.144737	0.361842	0.618421	0.991776	0.434211	0.401977	0.011513	0.291118	0.590461	0.782895	0.996711	0.383224
0.485327	0.24605	0.268623	0.210407	0.223982	0.153846	0.004515	0.27991	0.474041	0.659142	0.997743	0.018059	0.227991	0.553047	0.812641	1	0.002257	0.187359	0.514673	0.808126	0.988713	0.638826	0.158014	0.20316	0.074661	0.061086	0.002262	0.002257	0.295711	0.476298	0.668172	1	0.013544	0.137698	0.512415	0.873589	0.977427	0.065463	0.17833	0.670429	0.767494	0.943567	0.525959	0.38009	0.011287	0.320542	0.512415	0.690745	0.975169	0.21219
0.326733	0.346535	0.326733	0.23	0.24	0.19	0.039604	0.316832	0.50495	0.782178	1	0.019802	0.237624	0.485149	0.742574	0.970297	0.009901	0.188119	0.465347	0.70297	0.940594	0.485149	0.386139	0.128713	0.09	0.07	0.01	0.009901	0.247525	0.544554	0.871287	1	0.178218	0.29703	0.445545	0.594059	0.732673	0.069307	0.089109	0.118812	0.663366	0.831683	0.455446	0.38	0.049505	0.217822	0.435644	0.663366	0.960396	0.356436
0.415094	0.301887	0.283019	0.272152	0.21519	0.234177	0.012579	0.245283	0.54717	0.792453	1	0.037736	0.257862	0.446541	0.679245	0.987421	0.006289	0.213836	0.471698	0.691824	0.974843	0.27673	0.314465	0.408805	0.050633	0.063291	0.012658	0.006289	0.150943	0.345912	0.742138	1	0.025157	0.610063	0.691824	0.779874	0.861635	0.075472	0.283019	0.408805	0.540881	0.974843	0.402516	0.43038	0.018868	0.301887	0.496855	0.691824	0.981132	0.295597
0.393862	0.294118	0.31202	0.194872	0.266667	0.2	0.007673	0.232737	0.462916	0.716113	0.997442	0.005115	0.240409	0.534527	0.769821	0.97954	0.002558	0.28133	0.514066	0.734015	1	0.40665	0.396419	0.196931	0.105128	0.053846	0.017949	0.002558	0.245524	0.526854	0.767263	1	0.046036	0.219949	0.501279	0.7289	0.953964	0.007673	0.250639	0.475703	0.887468	0.992327	0.450128	0.405128	0.012788	0.283887	0.521739	0.731458	0.987212	0.329923
0.336683	0.336683	0.326633	0.227273	0.207071	0.207071	0.025126	0.226131	0.487437	0.738693	0.98995	0.01005	0.211055	0.437186	0.703518	0.984925	0.005025	0.266332	0.527638	0.788945	1	0.301508	0.276382	0.422111	0.035354	0.075758	0.015152	0.005025	0.115578	0.351759	0.81407	1	0.055276	0.180905	0.537688	0.61809	0.688442	0.150754	0.326633	0.482412	0.849246	0.984925	0.517588	0.393939	0.020101	0.261307	0.507538	0.79397	0.984925	0.311558
0.278873	0.51831	0.202817	0.274011	0.081921	0.251412	0.011268	0.143662	0.338028	0.732394	0.988732	0.005634	0.301408	0.495775	0.757746	0.994366	0.002817	0.346479	0.543662	0.723944	1	0.895775	0.033803	0.070423	0.028249	0.028249	0	0.002817	0.301408	0.538028	0.769014	1	0.016901	0.022535	0.498592	0.55493	0.95493	0.053521	0.101408	0.11831	0.250704	0.974648	0.388732	0.389831	0.016901	0.411268	0.552113	0.749296	0.983099	0.509859
0.366972	0.385321	0.247706	0.268519	0.194444	0.185185	0.027523	0.183486	0.449541	0.743119	0.981651	0.018349	0.357798	0.550459	0.733945	1	0.009174	0.174312	0.348624	0.678899	0.972477	0.201835	0	0.798165	0	0.055556	0	0.009174	0.412844	0.66055	0.706422	1	0	0	0	0	0	0.045872	0.229358	0.477064	0.752294	0.954128	0.321101	0.444444	0.055046	0.284404	0.522936	0.678899	0.926606	0.366972
0.31456	0.46978	0.215659	0.233838	0.169188	0.181568	0.004121	0.274725	0.524725	0.752747	1	0.002747	0.251374	0.471154	0.755495	0.997253	0.001374	0.230769	0.504121	0.718407	0.995879	0.678571	0.023352	0.298077	0.022008	0.055021	0	0.001374	0.299451	0.494505	0.725275	1	0.024725	0.255495	0.537088	0.726648	0.929945	0.063187	0.203297	0.506868	0.854396	0.989011	0.504121	0.404402	0.005495	0.243132	0.559066	0.718407	0.993132	0.48489
0.333797	0.358832	0.307371	0.236769	0.192201	0.218663	0.004172	0.194715	0.458971	0.732962	0.997218	0.006954	0.260083	0.521558	0.755216	1	0.001391	0.2879	0.50904	0.752434	0.993046	0.381085	0.155772	0.463143	0.054318	0.090529	0.001393	0.001391	0.235049	0.499305	0.713491	1	0.004172	0.299026	0.478442	0.564673	0.958275	0.022253	0.21975	0.495132	0.781641	0.993046	0.561892	0.342618	0.005563	0.301808	0.522949	0.751043	0.993046	0.371349
0.359813	0.323988	0.316199	0.196568	0.23869	0.234009	0.012461	0.260125	0.503115	0.757009	1	0.003115	0.228972	0.479751	0.719626	0.990654	0.001558	0.249221	0.520249	0.761682	0.996885	0.362928	0.267913	0.369159	0.115445	0.059282	0.00936	0.001558	0.23676	0.450156	0.735202	1	0.004673	0.26947	0.556075	0.752336	0.965732	0.031153	0.23053	0.484424	0.761682	0.985981	0.593458	0.358814	0.003115	0.283489	0.512461	0.744548	0.996885	0.338006
0.355072	0.304348	0.34058	0.189781	0.262774	0.218978	0.028986	0.253623	0.442029	0.710145	0.978261	0.014493	0.152174	0.557971	0.717391	0.985507	0.007246	0.275362	0.492754	0.73913	1	0.231884	0	0.768116	0	0.10219	0	0.007246	0.268116	0.550725	0.833333	1	0	0	0	0	0	0.021739	0.231884	0.456522	0.724638	0.956522	0.543478	0.408759	0.028986	0.304348	0.528986	0.724638	0.956522	0.311594
0.378641	0.339806	0.281553	0.303922	0.205882	0.156863	0.038835	0.252427	0.427184	0.728155	0.990291	0.067961	0.242718	0.563107	0.786408	1	0.009709	0.116505	0.407767	0.699029	0.912621	0.61165	0.097087	0.291262	0.098039	0.098039	0	0.009709	0.203883	0.368932	0.679612	1	0.097087	0.106796	0.524272	0.543689	0.708738	0.126214	0.407767	0.61165	0.825243	0.912621	0.38835	0.392157	0.07767	0.252427	0.495146	0.699029	0.961165	0.349515
0.363014	0.363014	0.273973	0.255172	0.248276	0.186207	0.013699	0.321918	0.445205	0.739726	1	0.054795	0.246575	0.5	0.678082	0.986301	0.006849	0.191781	0.520548	0.767123	0.972603	0.335616	0.328767	0.335616	0.131034	0.048276	0.006897	0.006849	0.150685	0.561644	0.746575	1	0.013699	0.19863	0.60274	0.883562	0.986301	0.164384	0.321918	0.40411	0.486301	0.821918	0.39726	0.482759	0.020548	0.19863	0.534247	0.732877	0.972603	0.369863
0.360424	0.289753	0.349823	0.187943	0.248227	0.258865	0.007067	0.226148	0.477032	0.738516	1	0.014134	0.261484	0.526502	0.773852	0.996466	0.003534	0.233216	0.491166	0.724382	0.978799	0.282686	0.091873	0.625442	0.031915	0.08156	0.003546	0.003534	0.137809	0.44523	0.773852	1	0.010601	0.038869	0.081272	0.109541	0.176678	0.144876	0.360424	0.565371	0.763251	0.978799	0.515901	0.382979	0.010601	0.257951	0.4947	0.731449	0.968198	0.272085
0.436314	0.319783	0.243902	0.293478	0.230978	0.163043	0.00542	0.200542	0.436314	0.728997	1	0.00813	0.298103	0.558266	0.783198	0.98374	0.00271	0.303523	0.498645	0.726287	0.99729	0.601626	0.230352	0.168022	0.086957	0.048913	0	0.00271	0.230352	0.547425	0.826558	1	0.094851	0.360434	0.452575	0.696477	0.99458	0.01084	0.075881	0.479675	0.674797	0.95935	0.330623	0.353261	0.01084	0.346883	0.506775	0.745257	0.99729	0.365854
0.369919	0.325203	0.304878	0.261224	0.24898	0.187755	0.00813	0.235772	0.54065	0.764228	1	0.020325	0.276423	0.52439	0.796748	0.98374	0.004065	0.227642	0.422764	0.646341	0.97561	0.296748	0.121951	0.581301	0.032653	0.097959	0	0.004065	0.162602	0.406504	0.654472	1	0.414634	0.735772	0.784553	0.813008	0.853659	0.01626	0.239837	0.487805	0.670732	0.99187	0.487805	0.35102	0.028455	0.235772	0.430894	0.654472	0.97561	0.292683
0.408318	0.302457	0.289225	0.227273	0.236742	0.185606	0.020794	0.238185	0.470699	0.73724	1	0.003781	0.293006	0.514178	0.776938	0.994329	0.00189	0.234405	0.512287	0.73535	0.996219	0.190926	0.069943	0.73913	0.022727	0.05303	0.003788	0.00189	0.480151	0.714556	0.829868	1	0.410208	0.470699	0.886578	0.969754	0.988658	0.009452	0.190926	0.379962	0.671078	0.952741	0.47259	0.401515	0.007561	0.383743	0.597353	0.780718	0.984877	0.293006
0.345291	0.340807	0.313901	0.256757	0.207207	0.193694	0.03139	0.26009	0.493274	0.766816	1	0.008969	0.269058	0.538117	0.780269	0.995516	0.004484	0.201794	0.426009	0.681614	0.977578	0.457399	0.103139	0.439462	0.04955	0.094595	0.004505	0.004484	0.125561	0.300448	0.623318	1	0.013453	0.179372	0.641256	0.668161	0.713004	0.165919	0.443946	0.587444	0.807175	0.991031	0.484305	0.459459	0.017937	0.309417	0.506726	0.748879	0.982063	0.358744
0.398058	0.281553	0.320388	0.254902	0.196078	0.186275	0.029126	0.165049	0.436893	0.650485	0.990291	0.019417	0.291262	0.495146	0.757282	1	0.009709	0.262136	0.466019	0.737864	0.951456	0.524272	0.359223	0.116505	0.127451	0.029412	0.009804	0.009709	0.203883	0.572816	0.854369	1	0.223301	0.339806	0.524272	0.718447	0.961165	0.116505	0.135922	0.165049	0.407767	0.436893	0.456311	0.333333	0.116505	0.320388	0.466019	0.737864	0.951456	0.378641
0.39586	0.310479	0.293661	0.217617	0.226684	0.204663	0.003881	0.204398	0.482536	0.791721	1	0.002587	0.279431	0.542044	0.741268	0.988357	0.001294	0.26132	0.485123	0.705045	0.989651	0.495472	0.128072	0.376455	0.054404	0.07772	0.005181	0.001294	0.156533	0.398448	0.699871	1	0.023286	0.359638	0.514877	0.637775	0.97542	0.029754	0.344114	0.595084	0.83053	0.996119	0.45925	0.352332	0.007762	0.315653	0.503234	0.712807	0.989651	0.359638
0.282927	0.409756	0.307317	0.22549	0.196078	0.269608	0.009756	0.243902	0.404878	0.643902	0.956098	0.014634	0.22439	0.570732	0.804878	1	0.004878	0.239024	0.473171	0.702439	0.917073	0.409756	0.443902	0.146341	0.127451	0.039216	0	0.004878	0.326829	0.57561	0.809756	1	0.019512	0.297561	0.468293	0.643902	0.887805	0.078049	0.107317	0.24878	0.678049	0.970732	0.429268	0.441176	0.02439	0.253659	0.463415	0.702439	0.985366	0.419512
0.273141	0.494689	0.23217	0.226444	0.12614	0.215805	0.030349	0.209408	0.488619	0.707132	0.995448	0.003035	0.227618	0.479514	0.748103	1	0.001517	0.329287	0.52959	0.772382	0.996965	0.637329	0.098634	0.264036	0.042553	0.066869	0.00304	0.001517	0.283763	0.626707	0.792109	1	0.353566	0.421851	0.518968	0.925645	0.996965	0.007587	0.162367	0.29742	0.447648	0.989378	0.538695	0.319149	0.010622	0.330804	0.581184	0.763278	0.998483	0.517451
0.380328	0.498361	0.121311	0.273026	0.098684	0.095395	0.006557	0.180328	0.488525	0.744262	1	0.013115	0.27541	0.406557	0.737705	0.996721	0.003279	0.55082	0.629508	0.763934	0.927869	0.806557	0.095082	0.098361	0.039474	0.039474	0	0.003279	0.219672	0.422951	0.793443	1	0.045902	0.613115	0.67541	0.757377	0.783607	0.032787	0.491803	0.586885	0.704918	0.957377	0.186885	0.203947	0.009836	0.540984	0.636066	0.721311	0.957377	0.511475
0.320482	0.40241	0.277108	0.252111	0.190591	0.230398	0.00241	0.268675	0.53012	0.76506	1	0.004819	0.240964	0.491566	0.744578	0.993976	0.001205	0.237349	0.478313	0.745783	0.996386	0.486747	0.228916	0.284337	0.101327	0.057901	0.002413	0.001205	0.213253	0.486747	0.742169	1	0.037349	0.206024	0.409639	0.750602	0.996386	0.006024	0.327711	0.571084	0.703614	0.991566	0.553012	0.393245	0.003614	0.246988	0.468675	0.722892	0.996386	0.473494
0.289238	0.39574	0.315022	0.242424	0.193042	0.250281	0.002242	0.269058	0.505605	0.76009	0.998879	0.004484	0.261211	0.51009	0.726457	1	0.001121	0.213004	0.475336	0.747758	0.997758	0.467489	0.241031	0.29148	0.102132	0.054994	0.003367	0.001121	0.221973	0.491031	0.713004	1	0.002242	0.183857	0.446188	0.819507	0.997758	0.005605	0.309417	0.568386	0.7287	0.991031	0.56278	0.399551	0.003363	0.254484	0.484305	0.745516	0.997758	0.423767
0.368864	0.417952	0.213184	0.280899	0.151685	0.161517	0.002805	0.235624	0.429173	0.667602	0.998597	0.004208	0.290323	0.608696	0.810659	1	0.001403	0.231417	0.464236	0.681627	0.997195	0.706872	0.145863	0.147265	0.075843	0.047753	0	0.001403	0.308555	0.605891	0.786816	1	0.00561	0.224404	0.352034	0.546985	0.995792	0.02805	0.15568	0.269285	0.509116	0.848527	0.45021	0.33427	0.007013	0.339411	0.628331	0.812062	0.99439	0.415147
0.4	0.363636	0.236364	0.259259	0.185185	0.111111	0.054545	0.236364	0.581818	0.745455	0.981818	0.036364	0.272727	0.381818	0.563636	0.854545	0.018182	0.163636	0.363636	0.781818	1	0.509091	0.490909	0	0.148148	0	0	0.018182	0.290909	0.509091	0.709091	1	0.127273	0.218182	0.418182	0.818182	0.945455	0	0	0	0	0	0.327273	0.407407	0.163636	0.254545	0.418182	0.672727	0.909091	0.327273
0.347826	0.336957	0.315217	0.230769	0.208791	0.197802	0.054348	0.195652	0.423913	0.836957	0.978261	0.021739	0.391304	0.630435	0.76087	1	0.01087	0.184783	0.347826	0.608696	0.804348	0.467391	0.358696	0.173913	0.10989	0.043956	0.021978	0.01087	0.315217	0.73913	0.880435	1	0.25	0.369565	0.48913	0.597826	0.782609	0.032609	0.108696	0.152174	0.195652	0.663043	0.456522	0.285714	0.097826	0.293478	0.456522	0.630435	0.793478	0.293478
0.43662	0.309859	0.253521	0.185714	0.257143	0.185714	0.028169	0.28169	0.492958	0.859155	1	0.084507	0.15493	0.535211	0.647887	0.915493	0.014085	0.197183	0.450704	0.56338	0.901408	0.478873	0.338028	0.183099	0.142857	0.028571	0	0.014085	0.112676	0.422535	0.633803	1	0.140845	0.211268	0.352113	0.492958	0.71831	0.788732	0.816901	0.859155	0.901408	0.957746	0.408451	0.428571	0.070423	0.239437	0.507042	0.619718	0.901408	0.338028
0.365854	0.349593	0.284553	0.270492	0.172131	0.188525	0.02439	0.170732	0.414634	0.780488	0.99187	0.01626	0.227642	0.471545	0.707317	0.96748	0.00813	0.300813	0.528455	0.813008	1	0.463415	0.292683	0.243902	0.114754	0.065574	0.016393	0.00813	0.252033	0.471545	0.772358	1	0.276423	0.520325	0.626016	0.869919	0.96748	0.105691	0.154472	0.227642	0.430894	0.756098	0.504065	0.311475	0.089431	0.292683	0.528455	0.699187	0.96748	0.333333
0.451505	0.337793	0.210702	0.278523	0.194631	0.157718	0.006689	0.274247	0.565217	0.755853	1	0.013378	0.267559	0.458194	0.719064	0.996656	0.003344	0.16388	0.337793	0.829431	0.986622	0.618729	0.207358	0.173913	0.080537	0.053691	0.006711	0.003344	0.280936	0.518395	0.688963	1	0.060201	0.150502	0.26087	0.354515	0.889632	0.056856	0.668896	0.849498	0.946488	0.989967	0.331104	0.281879	0.013378	0.16388	0.297659	0.48495	0.986622	0.411371
0.364789	0.370423	0.264789	0.248237	0.197461	0.211566	0.002817	0.215493	0.502817	0.757746	0.998592	0.005634	0.28169	0.504225	0.752113	0.997183	0.001408	0.253521	0.456338	0.694366	1	0.54507	0.207042	0.247887	0.084626	0.059238	0.002821	0.001408	0.201408	0.484507	0.760563	1	0.025352	0.287324	0.440845	0.646479	0.997183	0.042254	0.356338	0.566197	0.743662	0.95493	0.44507	0.344147	0.011268	0.257746	0.457746	0.738028	0.995775	0.384507
0.378378	0.27027	0.351351	0.19661	0.281356	0.216949	0.02027	0.216216	0.422297	0.702703	1	0.006757	0.266892	0.547297	0.777027	0.993243	0.003378	0.256757	0.510135	0.760135	0.996622	0.405405	0.081081	0.513514	0.044068	0.084746	0.016949	0.003378	0.27027	0.570946	0.783784	1	0.256757	0.287162	0.47973	0.625	0.77027	0.023649	0.182432	0.5	0.746622	0.989865	0.459459	0.508475	0.010135	0.280405	0.570946	0.760135	0.986486	0.320946
0.388158	0.302632	0.309211	0.225166	0.284768	0.211921	0.013158	0.269737	0.447368	0.717105	1	0.039474	0.217105	0.519737	0.710526	0.967105	0.006579	0.223684	0.513158	0.789474	0.986842	0.375	0.296053	0.328947	0.119205	0.05298	0.013245	0.006579	0.197368	0.559211	0.743421	1	0.013158	0.184211	0.631579	0.881579	0.980263	0.157895	0.296053	0.381579	0.460526	0.809211	0.401316	0.503311	0.019737	0.197368	0.513158	0.723684	0.986842	0.263158
0.316667	0.35	0.333333	0.226891	0.226891	0.260504	0.05	0.216667	0.508333	0.733333	0.991667	0.025	0.266667	0.483333	0.741667	0.983333	0.008333	0.241667	0.458333	0.725	1	0.383333	0.166667	0.45	0.05042	0.084034	0	0.008333	0.183333	0.341667	0.691667	1	0.233333	0.266667	0.4	0.7	0.741667	0.033333	0.458333	0.583333	0.85	0.966667	0.491667	0.369748	0.05	0.375	0.525	0.725	0.966667	0.391667
0.45045	0.198198	0.351351	0.1	0.309091	0.118182	0.018018	0.171171	0.522523	0.765766	1	0.117117	0.207207	0.333333	0.468468	0.810811	0.009009	0.252252	0.594595	0.792793	0.990991	0.351351	0.171171	0.477477	0.072727	0.054545	0.018182	0.009009	0.171171	0.315315	0.684685	1	0.234234	0.261261	0.378378	0.720721	0.972973	0.081081	0.441441	0.558559	0.837838	0.963964	0.432432	0.381818	0.045045	0.261261	0.477477	0.72973	0.990991	0.198198
0.481928	0.253012	0.26506	0.268293	0.231707	0.121951	0.060241	0.289157	0.46988	0.686747	1	0.024096	0.26506	0.506024	0.831325	0.987952	0.012048	0.180723	0.481928	0.698795	0.903614	0.253012	0	0.746988	0	0.073171	0	0.012048	0.060241	0.325301	0.771084	1	0	0	0	0	0	0.072289	0.240964	0.493976	0.674699	0.927711	0.325301	0.365854	0.072289	0.192771	0.566265	0.795181	0.915663	0.277108
0.400283	0.404526	0.195191	0.303116	0.148725	0.11898	0.004243	0.280057	0.437058	0.704385	1	0.002829	0.186704	0.424328	0.721358	0.998586	0.001414	0.490806	0.681754	0.838755	0.984441	0.591231	0.11174	0.29703	0.048159	0.073654	0.008499	0.001414	0.248939	0.408769	0.653465	1	0.015559	0.509194	0.623762	0.717115	0.902405	0.008487	0.189533	0.660537	0.826025	0.988685	0.417256	0.29745	0.009901	0.492221	0.663366	0.820368	0.990099	0.473833
0.334365	0.331269	0.334365	0.22314	0.231405	0.245868	0.004128	0.214654	0.480908	0.726522	0.998968	0.008256	0.257998	0.522188	0.75645	0.992776	0.001032	0.260062	0.49742	0.762642	1	0.465428	0.224974	0.309598	0.083678	0.069215	0.005165	0.001032	0.220846	0.449948	0.657379	1	0.003096	0.216718	0.499484	0.675955	0.988648	0.038184	0.293086	0.608875	0.816305	0.996904	0.561404	0.380165	0.007224	0.30031	0.54902	0.77709	0.996904	0.345717
0.351485	0.361386	0.287129	0.278607	0.243781	0.208955	0.019802	0.222772	0.480198	0.782178	1	0.009901	0.277228	0.559406	0.767327	0.99505	0.00495	0.237624	0.450495	0.678218	0.990099	0.415842	0.39604	0.188119	0.124378	0.064677	0.004975	0.00495	0.282178	0.584158	0.806931	1	0.009901	0.29703	0.445545	0.633663	0.886139	0.079208	0.222772	0.559406	0.782178	0.990099	0.420792	0.457711	0.014851	0.242574	0.445545	0.663366	0.89604	0.361386
0.411215	0.299065	0.28972	0.320755	0.283019	0.150943	0.046729	0.280374	0.514019	0.738318	0.981308	0.018692	0.233645	0.429907	0.728972	0.953271	0.009346	0.205607	0.504673	0.757009	1	0.504673	0.252336	0.242991	0.113208	0.056604	0	0.009346	0.121495	0.439252	0.794393	1	0.373832	0.420561	0.663551	0.859813	0.971963	0.168224	0.271028	0.336449	0.514019	0.579439	0.364486	0.415094	0.037383	0.242991	0.420561	0.654206	0.971963	0.280374
0.316667	0.45	0.233333	0.271186	0.135593	0.237288	0.05	0.166667	0.316667	0.65	0.933333	0.033333	0.2	0.45	0.716667	0.983333	0.016667	0.3	0.6	0.766667	1	0.7	0.116667	0.183333	0.101695	0.067797	0	0.016667	0.166667	0.55	0.716667	1	0.533333	0.533333	0.75	0.95	0.983333	0.216667	0.233333	0.3	0.35	0.4	0.283333	0.474576	0.1	0.416667	0.6	0.766667	0.966667	0.416667
0.378687	0.355852	0.265461	0.260952	0.217143	0.202857	0.001903	0.221694	0.49001	0.736441	0.996194	0.002854	0.24548	0.47098	0.75452	1	0.000951	0.284491	0.533777	0.758325	0.994291	0.574691	0.137964	0.287345	0.069524	0.082857	0.012381	0.000951	0.2255	0.472883	0.745956	1	0.003806	0.23216	0.440533	0.771646	0.973359	0.031399	0.328259	0.579448	0.699334	0.995243	0.378687	0.447619	0.002854	0.276879	0.510942	0.778306	0.994291	0.392008
0.306931	0.405941	0.287129	0.31	0.16	0.25	0.029703	0.188119	0.49505	0.722772	1	0.019802	0.247525	0.455446	0.732673	0.980198	0.009901	0.29703	0.50495	0.712871	0.950495	0.425743	0.376238	0.19802	0.11	0.05	0.01	0.009901	0.237624	0.445545	0.712871	1	0.039604	0.287129	0.60396	0.762376	0.920792	0.178218	0.217822	0.485149	0.534653	0.970297	0.49505	0.4	0.039604	0.29703	0.514851	0.792079	0.960396	0.415842
0.347426	0.290441	0.362132	0.174954	0.281768	0.198895	0.003676	0.28125	0.522059	0.775735	0.998162	0.007353	0.202206	0.465074	0.691176	1	0.001838	0.259191	0.514706	0.731618	0.992647	0.216912	0.022059	0.761029	0.005525	0.104972	0.001842	0.001838	0.222426	0.492647	0.737132	1	0.011029	0.014706	0.886029	0.891544	0.897059	0.020221	0.251838	0.503676	0.738971	0.992647	0.529412	0.441989	0.007353	0.262868	0.549632	0.751838	0.992647	0.268382
0.303614	0.361446	0.33494	0.248792	0.214976	0.241546	0.004819	0.289157	0.546988	0.754217	0.992771	0.007229	0.221687	0.489157	0.73494	1	0.00241	0.238554	0.448193	0.742169	0.99759	0.60241	0.120482	0.277108	0.05314	0.082126	0	0.00241	0.291566	0.53012	0.746988	1	0.012048	0.077108	0.286747	0.395181	0.86506	0.036145	0.250602	0.554217	0.845783	0.995181	0.522892	0.371981	0.009639	0.204819	0.404819	0.778313	0.99759	0.361446
0.330579	0.342975	0.326446	0.257261	0.19917	0.219917	0.016529	0.231405	0.520661	0.768595	0.991736	0.012397	0.293388	0.508264	0.780992	1	0.004132	0.18595	0.438017	0.677686	0.995868	0.326446	0.090909	0.582645	0.037344	0.095436	0.004149	0.004132	0.173554	0.392562	0.772727	1	0.165289	0.793388	0.847107	0.867769	0.900826	0.049587	0.280992	0.483471	0.644628	0.983471	0.512397	0.373444	0.008264	0.247934	0.438017	0.64876	0.987603	0.326446
0.341463	0.429268	0.229268	0.303922	0.151961	0.215686	0.029268	0.2	0.560976	0.795122	1	0.009756	0.282927	0.439024	0.717073	0.985366	0.004878	0.214634	0.497561	0.668293	0.980488	0.521951	0.121951	0.356098	0.058824	0.088235	0	0.004878	0.253659	0.55122	0.814634	1	0.165854	0.190244	0.239024	0.297561	0.629268	0.058537	0.336585	0.463415	0.702439	0.878049	0.556098	0.382353	0.019512	0.24878	0.439024	0.614634	0.965854	0.443902
0.303213	0.371486	0.325301	0.209256	0.225352	0.247485	0.006024	0.196787	0.518072	0.742972	0.997992	0.008032	0.289157	0.51004	0.738956	1	0.002008	0.238956	0.459839	0.757028	0.995984	0.403614	0.216867	0.379518	0.110664	0.066398	0.006036	0.002008	0.285141	0.552209	0.773092	1	0.044177	0.299197	0.526104	0.809237	0.985944	0.11245	0.226908	0.415663	0.646586	0.963855	0.644578	0.37827	0.01004	0.311245	0.512048	0.763052	0.987952	0.399598
0.324841	0.469214	0.205945	0.234043	0.134043	0.174468	0.006369	0.218684	0.41189	0.647558	1	0.012739	0.397028	0.636943	0.823779	0.995754	0.002123	0.133758	0.318471	0.564756	0.974522	0.683652	0.144374	0.171975	0.061702	0.048936	0.002128	0.002123	0.36518	0.622081	0.815287	1	0.070064	0.159236	0.269639	0.360934	0.974522	0.04034	0.178344	0.309979	0.456476	0.794055	0.484076	0.323404	0.065817	0.326964	0.539278	0.683652	0.976645	0.454352
0.274882	0.436019	0.2891	0.204762	0.157143	0.309524	0.066351	0.417062	0.606635	0.791469	0.990521	0.009479	0.189573	0.42654	0.725118	0.981043	0.004739	0.227488	0.412322	0.696682	1	0.492891	0.184834	0.322275	0.071429	0.061905	0.014286	0.004739	0.175355	0.317536	0.492891	1	0.085308	0.232227	0.454976	0.919431	0.995261	0.033175	0.559242	0.668246	0.758294	0.85782	0.511848	0.419048	0.014218	0.28436	0.445498	0.748815	0.995261	0.42654
0.329545	0.340909	0.329545	0.275862	0.241379	0.229885	0.113636	0.261364	0.602273	0.784091	1	0.034091	0.193182	0.397727	0.613636	0.988636	0.011364	0.170455	0.454545	0.715909	0.965909	0.340909	0.375	0.284091	0.137931	0.068966	0	0.011364	0.147727	0.363636	0.693182	1	0.022727	0.204545	0.318182	0.772727	0.897727	0.409091	0.465909	0.545455	0.613636	0.965909	0.613636	0.413793	0.022727	0.215909	0.431818	0.715909	0.965909	0.284091
0.363333	0.325	0.311667	0.198664	0.237062	0.215359	0.005	0.233333	0.5	0.793333	1	0.013333	0.291667	0.51	0.771667	0.998333	0.001667	0.23	0.461667	0.675	0.996667	0.506667	0.143333	0.35	0.0601	0.106845	0.006678	0.001667	0.286667	0.53	0.775	1	0.048333	0.173333	0.578333	0.728333	0.945	0.006667	0.233333	0.393333	0.651667	0.996667	0.488333	0.404007	0.01	0.236667	0.515	0.725	0.995	0.326667
0.376344	0.301075	0.322581	0.206522	0.271739	0.23913	0.032258	0.236559	0.462366	0.688172	0.903226	0.021505	0.247312	0.537634	0.892473	1	0.010753	0.182796	0.44086	0.666667	0.978495	0.494624	0.301075	0.204301	0.097826	0.032609	0.01087	0.010753	0.236559	0.645161	0.795699	1	0.11828	0.290323	0.569892	0.688172	0.88172	0.150538	0.182796	0.376344	0.430108	0.483871	0.365591	0.434783	0.043011	0.172043	0.44086	0.591398	0.978495	0.290323
0.385965	0.280702	0.333333	0.19469	0.238938	0.19469	0.04386	0.210526	0.491228	0.701754	1	0.026316	0.368421	0.614035	0.789474	0.991228	0.008772	0.175439	0.429825	0.710526	0.973684	0.385965	0.166667	0.447368	0.044248	0.097345	0.00885	0.008772	0.192982	0.350877	0.692982	1	0.263158	0.289474	0.394737	0.438596	0.745614	0.061404	0.447368	0.578947	0.859649	0.973684	0.429825	0.371681	0.035088	0.315789	0.535088	0.719298	0.973684	0.307018
0.512448	0.298755	0.188797	0.288981	0.178794	0.118503	0.010373	0.205394	0.441909	0.757261	1	0.004149	0.381743	0.607884	0.827801	0.997925	0.002075	0.288382	0.489627	0.624481	0.987552	0.510373	0.074689	0.414938	0.029106	0.04158	0.004158	0.002075	0.404564	0.672199	0.838174	1	0.3361	0.419087	0.560166	0.622407	0.989627	0.03112	0.145228	0.248963	0.512448	0.941909	0.284232	0.29106	0.018672	0.36722	0.506224	0.636929	0.991701	0.311203
0.271357	0.522613	0.20603	0.262626	0.121212	0.207071	0.01005	0.226131	0.502513	0.743719	0.98995	0.045226	0.271357	0.562814	0.798995	1	0.005025	0.231156	0.40201	0.547739	0.964824	0.648241	0.201005	0.150754	0.070707	0.020202	0	0.005025	0.180905	0.60804	0.834171	1	0.025126	0.326633	0.492462	0.638191	0.698492	0.226131	0.256281	0.361809	0.396985	0.437186	0.351759	0.262626	0.020101	0.251256	0.386935	0.532663	0.964824	0.537688
0.422819	0.288591	0.288591	0.209459	0.27027	0.182432	0.013423	0.255034	0.442953	0.744966	1	0.087248	0.261745	0.516779	0.711409	0.959732	0.006711	0.194631	0.530201	0.731544	0.966443	0.362416	0.302013	0.33557	0.128378	0.047297	0.006757	0.006711	0.14094	0.557047	0.744966	1	0.013423	0.241611	0.604027	0.872483	0.973154	0.167785	0.322148	0.409396	0.637584	0.818792	0.395973	0.486486	0.020134	0.201342	0.516779	0.731544	0.966443	0.302013
0.406926	0.372294	0.220779	0.304348	0.16087	0.182609	0.012987	0.264069	0.47619	0.731602	1	0.008658	0.212121	0.502165	0.766234	0.995671	0.004329	0.199134	0.463203	0.727273	0.930736	0.549784	0.090909	0.359307	0.047826	0.056522	0.004348	0.004329	0.337662	0.619048	0.757576	1	0.017316	0.056277	0.333333	0.52381	0.978355	0.077922	0.168831	0.380952	0.562771	0.904762	0.320346	0.382609	0.017316	0.199134	0.497835	0.753247	0.969697	0.337662
0.32715	0.406408	0.266442	0.263514	0.163851	0.202703	0.003373	0.161889	0.467116	0.735245	1	0.006745	0.25801	0.526138	0.772344	0.998314	0.001686	0.317032	0.509275	0.715008	0.978078	0.50253	0.139966	0.357504	0.050676	0.077703	0.006757	0.001686	0.131535	0.376054	0.650927	1	0.183811	0.470489	0.630691	0.753794	0.887015	0.006745	0.350759	0.581788	0.789207	0.988196	0.505902	0.344595	0.006745	0.330523	0.51602	0.738617	0.966273	0.438449
0.388704	0.303987	0.307309	0.219634	0.242928	0.1797	0.003322	0.275748	0.516611	0.795681	0.998339	0.004983	0.237542	0.503322	0.715947	0.993355	0.001661	0.217608	0.453488	0.717608	1	0.503322	0.181063	0.315615	0.071547	0.058236	0.001664	0.001661	0.260797	0.538206	0.770764	1	0.038206	0.164452	0.475083	0.60299	0.976744	0.066445	0.249169	0.430233	0.807309	0.975083	0.501661	0.339434	0.006645	0.222591	0.465116	0.709302	0.996678	0.322259
0.410072	0.29976	0.290168	0.235577	0.233173	0.173077	0.007194	0.242206	0.534772	0.726619	1	0.004796	0.297362	0.479616	0.800959	0.995204	0.002398	0.203837	0.434053	0.738609	0.997602	0.441247	0.206235	0.352518	0.0625	0.067308	0.009615	0.002398	0.266187	0.532374	0.688249	1	0.023981	0.170264	0.47482	0.714628	0.844125	0.071942	0.282974	0.407674	0.841727	0.992806	0.467626	0.399038	0.01199	0.213429	0.429257	0.760192	0.990408	0.29976
0.383562	0.369863	0.246575	0.275862	0.186207	0.165517	0.020548	0.315068	0.60274	0.842466	1	0.013699	0.19863	0.458904	0.650685	0.979452	0.006849	0.191781	0.452055	0.69863	0.972603	0.5	0.150685	0.349315	0.075862	0.048276	0.02069	0.006849	0.30137	0.438356	0.630137	1	0.191781	0.445205	0.547945	0.657534	0.979452	0.075342	0.171233	0.678082	0.767123	0.856164	0.363014	0.386207	0.034247	0.19863	0.431507	0.657534	0.910959	0.376712
0.306931	0.356436	0.336634	0.18	0.22	0.27	0.019802	0.19802	0.465347	0.762376	0.980198	0.059406	0.277228	0.544554	0.70297	1	0.009901	0.217822	0.425743	0.712871	0.920792	0.346535	0.306931	0.346535	0.08	0.06	0.02	0.009901	0.148515	0.524752	0.811881	1	0.039604	0.09901	0.475248	0.613861	0.910891	0.158416	0.227723	0.316832	0.752475	0.871287	0.475248	0.42	0.039604	0.217822	0.485149	0.70297	0.920792	0.336634
0.358974	0.333333	0.307692	0.221963	0.235981	0.21729	0.013986	0.263403	0.503497	0.792541	0.997669	0.004662	0.226107	0.508159	0.736597	0.993007	0.002331	0.247086	0.477855	0.694639	1	0.389277	0.398601	0.212121	0.107477	0.056075	0.023364	0.002331	0.27972	0.5338	0.764569	1	0.04662	0.265734	0.543124	0.757576	0.979021	0.004662	0.09324	0.32634	0.713287	0.995338	0.480186	0.397196	0.009324	0.2331	0.487179	0.72028	0.990676	0.398601
0.453202	0.344828	0.20197	0.30198	0.20297	0.128713	0.009852	0.270936	0.536946	0.753695	0.995074	0.019704	0.211823	0.507389	0.783251	1	0.004926	0.261084	0.428571	0.576355	0.990148	0.536946	0.128079	0.334975	0.074257	0.064356	0.00495	0.004926	0.216749	0.374384	0.788177	1	0.108374	0.339901	0.522167	0.655172	0.862069	0.019704	0.389163	0.571429	0.748768	0.985222	0.330049	0.366337	0.019704	0.20197	0.44335	0.581281	0.985222	0.344828
0.344942	0.33665	0.318408	0.242525	0.232558	0.200997	0.021559	0.271973	0.474295	0.752902	0.996683	0.004975	0.189055	0.45937	0.721393	1	0.001658	0.283582	0.560531	0.78607	0.998342	0.532338	0.140962	0.3267	0.053156	0.066445	0.006645	0.001658	0.15257	0.344942	0.648425	1	0.238806	0.504146	0.681592	0.817579	0.961857	0.013267	0.361526	0.595357	0.792703	0.995025	0.547264	0.352159	0.00995	0.320066	0.533997	0.756219	0.993367	0.353234
0.405882	0.314706	0.279412	0.225331	0.200295	0.181149	0.005882	0.158824	0.438235	0.732353	1	0.002941	0.289706	0.514706	0.760294	0.992647	0.001471	0.364706	0.557353	0.744118	0.998529	0.491176	0.127941	0.380882	0.045655	0.07511	0.007364	0.001471	0.183824	0.377941	0.739706	1	0.126471	0.426471	0.577941	0.714706	0.926471	0.004412	0.348529	0.529412	0.801471	0.997059	0.427941	0.324006	0.007353	0.385294	0.545588	0.738235	0.997059	0.351471
0.413333	0.36	0.226667	0.27027	0.162162	0.162162	0.04	0.2	0.506667	0.786667	0.96	0.026667	0.226667	0.36	0.613333	0.973333	0.013333	0.28	0.546667	0.666667	1	0.546667	0	0.453333	0	0.081081	0	0.013333	0.2	0.333333	0.6	1	0	0	0	0	0	0.133333	0.493333	0.653333	0.76	0.88	0.32	0.243243	0.08	0.466667	0.546667	0.626667	0.866667	0.373333
0.362805	0.365854	0.271341	0.264122	0.169466	0.20916	0.01372	0.248476	0.477134	0.762195	0.995427	0.003049	0.219512	0.48628	0.722561	0.996951	0.001524	0.27439	0.544207	0.759146	1	0.490854	0.135671	0.373476	0.047328	0.083969	0.010687	0.001524	0.1875	0.387195	0.722561	1	0.030488	0.503049	0.660061	0.86128	0.964939	0.006098	0.291159	0.52439	0.728659	0.993902	0.493902	0.345038	0.006098	0.324695	0.542683	0.759146	0.993902	0.381098
0.324324	0.388514	0.287162	0.240678	0.166102	0.264407	0.006757	0.287162	0.513514	0.790541	0.996622	0.013514	0.209459	0.476351	0.739865	1	0.003378	0.253378	0.5	0.682432	0.989865	0.432432	0.158784	0.408784	0.047458	0.088136	0	0.003378	0.148649	0.432432	0.709459	1	0.219595	0.310811	0.452703	0.648649	0.733108	0.074324	0.273649	0.533784	0.824324	0.976351	0.527027	0.359322	0.013514	0.27027	0.486486	0.685811	0.966216	0.429054
0.273423	0.391013	0.335564	0.216268	0.204785	0.278469	0.005736	0.23805	0.466539	0.736138	0.989484	0.002868	0.264818	0.516252	0.759082	1	0.000956	0.231358	0.499044	0.73327	0.993308	0.472275	0.271511	0.256214	0.105263	0.053589	0.007656	0.000956	0.299235	0.528681	0.786807	1	0.010516	0.368069	0.601338	0.842256	0.993308	0.005736	0.116635	0.256214	0.622371	0.859465	0.634799	0.329187	0.003824	0.270554	0.540153	0.770554	0.997132	0.417782
0.340102	0.345178	0.314721	0.229008	0.229008	0.223919	0.007614	0.271574	0.497462	0.763959	0.997462	0.005076	0.228426	0.472081	0.746193	0.989848	0.002538	0.243655	0.520305	0.738579	1	0.467005	0.213198	0.319797	0.083969	0.089059	0.017812	0.002538	0.238579	0.459391	0.751269	1	0.017766	0.335025	0.558376	0.738579	0.92132	0.048223	0.203046	0.525381	0.771574	0.984772	0.527919	0.437659	0.017766	0.261421	0.530457	0.741117	0.994924	0.383249
0.314685	0.376224	0.309091	0.2493	0.194678	0.235294	0.002797	0.267133	0.551049	0.774825	1	0.008392	0.21958	0.454545	0.723077	0.995804	0.001399	0.274126	0.48951	0.728671	0.998601	0.398601	0.18042	0.420979	0.088235	0.077031	0.004202	0.001399	0.278322	0.518881	0.827972	1	0.004196	0.186014	0.360839	0.87972	0.997203	0.039161	0.286713	0.534266	0.668531	0.927273	0.524476	0.383754	0.006993	0.246154	0.46014	0.681119	0.998601	0.376224
0.338028	0.352113	0.309859	0.240566	0.25	0.245283	0.023474	0.258216	0.488263	0.807512	0.985915	0.014085	0.267606	0.507042	0.760563	1	0.004695	0.192488	0.469484	0.694836	0.995305	0.464789	0.375587	0.159624	0.160377	0.018868	0	0.004695	0.169014	0.422535	0.802817	1	0.065728	0.248826	0.389671	0.694836	0.971831	0.441315	0.474178	0.516432	0.821596	0.86385	0.474178	0.490566	0.018779	0.183099	0.492958	0.666667	0.957746	0.361502
0.337449	0.358025	0.304527	0.285124	0.210744	0.202479	0.012346	0.201646	0.530864	0.773663	0.987654	0.00823	0.230453	0.481481	0.707819	0.995885	0.004115	0.288066	0.465021	0.736626	1	0.534979	0.209877	0.255144	0.057851	0.066116	0.016529	0.004115	0.152263	0.320988	0.621399	1	0.08642	0.36214	0.502058	0.740741	0.995885	0.242798	0.427984	0.658436	0.835391	0.950617	0.469136	0.31405	0.061728	0.308642	0.534979	0.728395	0.99177	0.374486
0.38835	0.368932	0.242718	0.284314	0.205882	0.215686	0.067961	0.339806	0.61165	0.796117	0.990291	0.019417	0.213592	0.495146	0.747573	1	0.009709	0.165049	0.330097	0.572816	0.961165	0.543689	0.242718	0.213592	0.176471	0.039216	0	0.009709	0.349515	0.669903	0.84466	1	0.019417	0.262136	0.398058	0.475728	0.883495	0.135922	0.174757	0.23301	0.543689	0.601942	0.378641	0.392157	0.029126	0.203883	0.417476	0.572816	0.961165	0.38835
0.37265	0.321368	0.305983	0.22774	0.239726	0.190068	0.003419	0.232479	0.482051	0.777778	1	0.008547	0.271795	0.528205	0.757265	0.998291	0.001709	0.22906	0.480342	0.702564	0.989744	0.494017	0.176068	0.329915	0.063356	0.070205	0.005137	0.001709	0.213675	0.475214	0.764103	1	0.042735	0.25812	0.452991	0.564103	0.704274	0.05812	0.283761	0.622222	0.837607	0.996581	0.466667	0.363014	0.006838	0.247863	0.488889	0.697436	0.996581	0.353846
0.356269	0.351682	0.292049	0.222052	0.189893	0.212864	0.007645	0.321101	0.629969	0.847095	1	0.003058	0.212538	0.437309	0.678899	0.995413	0.001529	0.224771	0.443425	0.66208	0.996942	0.397554	0.134557	0.46789	0.052067	0.101072	0.006126	0.001529	0.215596	0.507645	0.764526	1	0.087156	0.255352	0.392966	0.544343	0.79052	0.025994	0.2737	0.551988	0.821101	0.990826	0.481651	0.367534	0.015291	0.203364	0.425076	0.616208	0.996942	0.368502
0.446629	0.407303	0.146067	0.340845	0.152113	0.070423	0.005618	0.244382	0.511236	0.747191	1	0.008427	0.303371	0.578652	0.780899	0.994382	0.002809	0.109551	0.283708	0.438202	0.966292	0.713483	0.16573	0.120787	0.067606	0.028169	0	0.002809	0.342697	0.623596	0.803371	1	0.008427	0.115169	0.345506	0.435393	0.932584	0.042135	0.067416	0.154494	0.393258	0.783708	0.300562	0.321127	0.011236	0.154494	0.370787	0.58427	0.974719	0.426966
0.373606	0.405204	0.22119	0.255121	0.148976	0.188082	0.005576	0.369888	0.635688	0.834572	1	0.003717	0.224907	0.39777	0.654275	0.994424	0.001859	0.159851	0.468401	0.684015	0.996283	0.546468	0.013011	0.44052	0.009311	0.083799	0.001862	0.001859	0.245353	0.3829	0.669145	1	0.420074	0.420074	0.942379	0.990706	0.994424	0.01487	0.169145	0.615242	0.765799	0.94052	0.381041	0.357542	0.013011	0.19145	0.477695	0.674721	0.996283	0.442379
0.339506	0.391975	0.268519	0.250774	0.216718	0.195046	0.018519	0.271605	0.496914	0.805556	1	0.006173	0.274691	0.509259	0.679012	0.990741	0.003086	0.197531	0.475309	0.765432	0.996914	0.540123	0.179012	0.280864	0.065015	0.058824	0.009288	0.003086	0.290123	0.537037	0.694444	1	0.074074	0.138889	0.70679	0.817901	0.938272	0.037037	0.231481	0.354938	0.641975	0.978395	0.453704	0.408669	0.012346	0.231481	0.469136	0.712963	0.941358	0.459877
0.44	0.261818	0.298182	0.229927	0.226277	0.171533	0.018182	0.152727	0.370909	0.694545	1	0.007273	0.367273	0.534545	0.781818	0.945455	0.003636	0.345455	0.538182	0.745455	0.985455	0.407273	0.109091	0.483636	0.069343	0.054745	0.00365	0.003636	0.370909	0.64	0.829091	1	0.283636	0.36	0.538182	0.654545	0.927273	0.032727	0.149091	0.403636	0.596364	0.992727	0.421818	0.386861	0.014545	0.396364	0.549091	0.741818	0.996364	0.298182
0.411576	0.315113	0.273312	0.287097	0.251613	0.151613	0.009646	0.263666	0.530547	0.768489	1	0.061093	0.289389	0.540193	0.810289	0.990354	0.003215	0.202572	0.427653	0.620579	0.974277	0.421222	0.102894	0.475884	0.03871	0.090323	0	0.003215	0.273312	0.633441	0.864952	1	0.366559	0.623794	0.675241	0.951768	0.980707	0.006431	0.205788	0.405145	0.527331	0.823151	0.430868	0.341935	0.006431	0.212219	0.401929	0.569132	0.980707	0.315113
0.393782	0.300518	0.305699	0.230104	0.212803	0.186851	0.003454	0.193437	0.490501	0.761658	0.996546	0.013817	0.222798	0.481865	0.770294	1	0.001727	0.319516	0.512953	0.713299	0.979275	0.468048	0.150259	0.381693	0.050173	0.077855	0.00519	0.001727	0.127807	0.352332	0.716753	1	0.005181	0.414508	0.590674	0.713299	0.841105	0.022453	0.340242	0.568221	0.804836	0.989637	0.502591	0.318339	0.005181	0.303972	0.492228	0.708117	0.991364	0.348877
0.353033	0.33437	0.312597	0.224299	0.23676	0.211838	0.004666	0.203733	0.466563	0.696734	0.998445	0.00311	0.283048	0.536547	0.765163	0.99689	0.001555	0.227061	0.517885	0.760498	1	0.407465	0.066874	0.525661	0.029595	0.104361	0.001558	0.001555	0.292379	0.55832	0.810264	1	0.060653	0.11042	0.744946	0.88647	0.970451	0.00311	0.242613	0.458787	0.645412	0.993779	0.556765	0.392523	0.007776	0.255054	0.544323	0.77916	0.992224	0.362364
0.344828	0.403941	0.251232	0.341584	0.207921	0.193069	0.014778	0.280788	0.527094	0.812808	1	0.009852	0.251232	0.482759	0.70936	0.985222	0.004926	0.17734	0.448276	0.684729	0.960591	0.413793	0.369458	0.216749	0.148515	0.039604	0	0.004926	0.197044	0.576355	0.866995	1	0.044335	0.172414	0.541872	0.694581	0.975369	0.285714	0.418719	0.472906	0.807882	0.862069	0.438424	0.485149	0.019704	0.29064	0.502463	0.674877	0.960591	0.403941
0.311475	0.401639	0.286885	0.251029	0.176955	0.271605	0.012295	0.233607	0.459016	0.770492	0.995902	0.008197	0.22541	0.528689	0.778689	1	0.004098	0.258197	0.47541	0.704918	0.983607	0.311475	0.077869	0.610656	0.032922	0.106996	0	0.004098	0.184426	0.397541	0.778689	1	0.471311	0.79918	0.848361	0.868852	0.897541	0.028689	0.278689	0.487705	0.655738	0.987705	0.495902	0.378601	0.036885	0.27459	0.471311	0.672131	0.983607	0.389344
0.358333	0.354167	0.2875	0.284519	0.179916	0.225941	0.0125	0.208333	0.4625	0.791667	1	0.008333	0.325	0.5625	0.779167	0.991667	0.004167	0.216667	0.3875	0.625	0.9625	0.275	0.116667	0.608333	0.037657	0.121339	0.004184	0.004167	0.141667	0.391667	0.725	1	0.133333	0.758333	0.804167	0.841667	0.870833	0.029167	0.254167	0.479167	0.633333	0.983333	0.483333	0.343096	0.020833	0.220833	0.420833	0.620833	0.945833	0.3125
0.365854	0.273171	0.360976	0.190709	0.249389	0.215159	0.004878	0.290244	0.560976	0.814634	0.997561	0.009756	0.236585	0.502439	0.736585	0.990244	0.002439	0.226829	0.436585	0.687805	1	0.356098	0.182927	0.460976	0.056235	0.100244	0.007335	0.002439	0.25122	0.54878	0.760976	1	0.085366	0.241463	0.443902	0.656098	0.780488	0.012195	0.209756	0.5	0.804878	0.973171	0.52439	0.337408	0.007317	0.202439	0.392683	0.663415	0.94878	0.256098
0.316294	0.400958	0.282748	0.216	0.16	0.232	0.00639	0.34984	0.63738	0.857827	1	0.003195	0.215655	0.460064	0.710863	0.996805	0.001597	0.201278	0.429712	0.635783	0.998403	0.416933	0.119808	0.463259	0.048	0.0864	0.0064	0.001597	0.217252	0.5	0.777955	1	0.004792	0.244409	0.378594	0.538339	0.99361	0.027157	0.303514	0.539936	0.771565	0.979233	0.485623	0.3552	0.004792	0.198083	0.408946	0.608626	0.998403	0.413738
0.324034	0.392704	0.283262	0.253763	0.184946	0.225806	0.006438	0.238197	0.495708	0.729614	0.997854	0.004292	0.244635	0.497854	0.77897	1	0.002146	0.257511	0.487124	0.753219	0.991416	0.390558	0.186695	0.422747	0.062366	0.066667	0.002151	0.002146	0.291845	0.5	0.742489	1	0.103004	0.246781	0.487124	0.761803	0.950644	0.01073	0.199571	0.433476	0.678112	0.98927	0.551502	0.395699	0.01073	0.26824	0.487124	0.714592	0.991416	0.454936
0.355422	0.36747	0.277108	0.269618	0.191147	0.181087	0.008032	0.2249	0.463855	0.753012	1	0.004016	0.263052	0.528112	0.769076	0.995984	0.002008	0.2751	0.516064	0.706827	0.981928	0.48996	0.160643	0.349398	0.078471	0.074447	0.01006	0.002008	0.251004	0.568273	0.807229	1	0.046185	0.192771	0.626506	0.773092	0.935743	0.02008	0.2751	0.445783	0.610442	0.993976	0.600402	0.321932	0.02008	0.285141	0.508032	0.706827	0.995984	0.381526
0.493056	0.25	0.256944	0.300699	0.216783	0.090909	0.020833	0.166667	0.465278	0.770833	0.993056	0.013889	0.25	0.555556	0.743056	0.9375	0.006944	0.326389	0.479167	0.638889	1	0.597222	0.3125	0.090278	0.111888	0.027972	0	0.006944	0.145833	0.520833	0.819444	1	0.159722	0.270833	0.402778	0.527778	0.798611	0.673611	0.6875	0.708333	0.729167	0.979167	0.375	0.335664	0.180556	0.340278	0.520833	0.659722	0.979167	0.354167
0.32	0.429565	0.250435	0.252613	0.155052	0.236934	0.005217	0.170435	0.415652	0.695652	0.984348	0.003478	0.332174	0.582609	0.786087	1	0.001739	0.198261	0.429565	0.726957	0.998261	0.732174	0.109565	0.158261	0.041812	0.04878	0.003484	0.001739	0.349565	0.58087	0.8	1	0.062609	0.18087	0.246957	0.328696	0.956522	0.073043	0.163478	0.34087	0.426087	0.733913	0.438261	0.327526	0.024348	0.276522	0.549565	0.812174	0.991304	0.445217
0.388095	0.27381	0.338095	0.202864	0.264916	0.181384	0.007143	0.264286	0.535714	0.778571	0.997619	0.009524	0.2	0.45	0.678571	1	0.002381	0.254762	0.519048	0.769048	0.995238	0.338095	0.145238	0.516667	0.076372	0.100239	0.004773	0.002381	0.214286	0.545238	0.816667	1	0.085714	0.278571	0.521429	0.92381	0.997619	0.004762	0.252381	0.430952	0.697619	0.897619	0.585714	0.396181	0.011905	0.25	0.459524	0.680952	0.995238	0.278571
0.455882	0.25	0.294118	0.298507	0.238806	0.149254	0.029412	0.176471	0.455882	0.720588	0.985294	0.117647	0.235294	0.441176	0.602941	0.911765	0.014706	0.308824	0.485294	0.838235	1	0.558824	0.029412	0.411765	0.029851	0.059701	0	0.014706	0.132353	0.411765	0.573529	1	0.470588	0.470588	0.470588	0.470588	0.485294	0.279412	0.367647	0.676471	0.779412	0.882353	0.367647	0.447761	0.073529	0.323529	0.544118	0.764706	0.926471	0.264706
0.311649	0.461422	0.226929	0.254545	0.14697	0.215152	0.003026	0.267776	0.476551	0.74584	1	0.004539	0.249622	0.529501	0.747352	0.995461	0.001513	0.23298	0.459909	0.738275	0.996974	0.744327	0.125567	0.130106	0.062121	0.040909	0.001515	0.001513	0.29652	0.538578	0.742814	1	0.006051	0.231467	0.461422	0.856278	0.984871	0.055976	0.18003	0.26475	0.670197	0.910741	0.443268	0.336364	0.006051	0.22239	0.512859	0.771558	0.996974	0.458396
0.446429	0.196429	0.357143	0.153153	0.306306	0.171171	0.017857	0.1875	0.535714	0.821429	1	0.044643	0.276786	0.401786	0.625	0.955357	0.008929	0.223214	0.464286	0.714286	0.991071	0.294643	0.232143	0.473214	0.09009	0.072072	0	0.008929	0.1875	0.401786	0.678571	1	0.035714	0.196429	0.276786	0.366071	0.723214	0.098214	0.446429	0.5625	0.839286	0.964286	0.428571	0.396396	0.044643	0.276786	0.464286	0.705357	0.928571	0.160714
0.330882	0.492647	0.176471	0.266667	0.103704	0.185185	0.014706	0.360294	0.507353	0.639706	0.992647	0.022059	0.257353	0.595588	0.838235	1	0.007353	0.183824	0.264706	0.492647	0.985294	0.852941	0.102941	0.044118	0.074074	0.02963	0	0.007353	0.301471	0.522059	0.779412	1	0.191176	0.205882	0.242647	0.272059	0.911765	0.610294	0.610294	0.639706	0.647059	0.661765	0.205882	0.207407	0.058824	0.220588	0.272059	0.463235	0.985294	0.522059
0.379015	0.375803	0.245182	0.285102	0.181136	0.180064	0.003212	0.310493	0.594218	0.804069	1	0.002141	0.233405	0.475375	0.755889	0.994647	0.001071	0.223769	0.421842	0.624197	0.981799	0.541756	0.114561	0.343683	0.049303	0.085745	0.004287	0.001071	0.182013	0.533191	0.771949	1	0.093148	0.266595	0.431478	0.656317	0.87152	0.108137	0.283726	0.518201	0.680942	0.996788	0.395075	0.323687	0.005353	0.218415	0.404711	0.583512	0.979657	0.404711
0.290934	0.384303	0.324763	0.210027	0.185637	0.242547	0.008119	0.286874	0.535859	0.742896	0.994587	0.002706	0.236806	0.499323	0.746955	0.997294	0.001353	0.219215	0.461434	0.753721	1	0.462788	0.253045	0.284168	0.097561	0.054201	0	0.001353	0.236806	0.50203	0.691475	1	0.005413	0.231394	0.564276	0.818674	0.97023	0.087957	0.296346	0.396482	0.7023	0.99594	0.543978	0.384824	0.006766	0.219215	0.44249	0.728011	0.99594	0.400541
0.473896	0.228916	0.297189	0.205645	0.290323	0.133065	0.016064	0.24498	0.48996	0.751004	1	0.036145	0.240964	0.554217	0.767068	0.97992	0.004016	0.220884	0.433735	0.698795	0.987952	0.48996	0.236948	0.273092	0.092742	0.068548	0.004032	0.004016	0.168675	0.522088	0.751004	1	0.076305	0.273092	0.441767	0.702811	0.915663	0.008032	0.349398	0.48996	0.803213	0.951807	0.341365	0.33871	0.008032	0.248996	0.570281	0.759036	0.987952	0.261044
0.349593	0.284553	0.365854	0.196721	0.278689	0.221311	0.01626	0.333333	0.552846	0.747967	0.99187	0.056911	0.170732	0.430894	0.756098	1	0.00813	0.203252	0.414634	0.715447	0.98374	0.447154	0.463415	0.089431	0.098361	0.032787	0.016393	0.00813	0.162602	0.495935	0.699187	1	0.02439	0.300813	0.455285	0.707317	0.910569	0.113821	0.121951	0.886179	0.95935	0.98374	0.373984	0.52459	0.02439	0.284553	0.430894	0.731707	0.98374	0.260163
0.264516	0.44086	0.294624	0.226293	0.170259	0.232759	0.004301	0.189247	0.462366	0.707527	0.997849	0.006452	0.301075	0.554839	0.782796	1	0.002151	0.206452	0.423656	0.675269	0.995699	0.44086	0.189247	0.369892	0.068966	0.073276	0.00431	0.002151	0.286022	0.509677	0.767742	1	0.12043	0.266667	0.623656	0.756989	0.929032	0.025806	0.204301	0.430108	0.696774	0.989247	0.544086	0.396552	0.008602	0.27957	0.51828	0.733333	0.995699	0.44086
0.371648	0.310345	0.318008	0.191939	0.25144	0.211132	0.007663	0.249042	0.503831	0.798851	1	0.003831	0.226054	0.522989	0.747126	0.994253	0.001916	0.254789	0.471264	0.691571	0.992337	0.519157	0.116858	0.363985	0.047985	0.06334	0.005758	0.001916	0.283525	0.613027	0.862069	1	0.113027	0.237548	0.632184	0.747126	0.952107	0.005747	0.176245	0.371648	0.570881	0.954023	0.534483	0.349328	0.009579	0.254789	0.434866	0.641762	0.984674	0.333333
0.37037	0.422222	0.207407	0.358209	0.171642	0.134328	0.022222	0.274074	0.518519	0.740741	1	0.014815	0.162963	0.348148	0.644444	0.992593	0.007407	0.481481	0.62963	0.837037	0.97037	0.533333	0.340741	0.125926	0.074627	0.074627	0.014925	0.007407	0.266667	0.4	0.755556	1	0.22963	0.474074	0.6	0.718519	0.955556	0.02963	0.088889	0.118519	0.148148	0.977778	0.377778	0.492537	0.081481	0.244444	0.488889	0.725926	0.97037	0.42963
0.353535	0.40404	0.242424	0.234694	0.193878	0.204082	0.050505	0.20202	0.383838	0.717172	0.959596	0.020202	0.242424	0.565657	0.686869	1	0.010101	0.353535	0.505051	0.818182	0.989899	0.474747	0.323232	0.20202	0.142857	0.040816	0	0.010101	0.292929	0.686869	0.878788	1	0.030303	0.242424	0.515152	0.646465	0.818182	0.111111	0.151515	0.333333	0.383838	0.434343	0.393939	0.387755	0.030303	0.222222	0.454545	0.767677	0.979798	0.383838
0.318627	0.352941	0.328431	0.206135	0.225767	0.24908	0.002451	0.254902	0.498775	0.729167	0.998775	0.004902	0.245098	0.503676	0.778186	1	0.001225	0.240196	0.493873	0.734069	0.996324	0.476716	0.243873	0.279412	0.104294	0.057669	0.001227	0.001225	0.230392	0.48652	0.748775	1	0.039216	0.197304	0.41299	0.800245	0.997549	0.006127	0.308824	0.525735	0.689951	0.991422	0.557598	0.38773	0.003676	0.262255	0.465686	0.735294	0.996324	0.392157
0.446009	0.29108	0.262911	0.207547	0.264151	0.150943	0.00939	0.253521	0.478873	0.71831	0.995305	0.014085	0.328638	0.605634	0.816901	0.985915	0.004695	0.206573	0.408451	0.652582	1	0.516432	0.234742	0.248826	0.108491	0.042453	0.014151	0.004695	0.328638	0.525822	0.769953	1	0.032864	0.253521	0.384977	0.877934	0.948357	0.014085	0.103286	0.43662	0.58216	0.694836	0.262911	0.320755	0.018779	0.15493	0.356808	0.633803	0.938967	0.28169
0.321637	0.340643	0.337719	0.204978	0.222548	0.238653	0.010234	0.290936	0.545322	0.783626	0.991228	0.002924	0.23538	0.482456	0.726608	1	0.001462	0.222222	0.473684	0.74269	0.998538	0.432749	0.241228	0.326023	0.098097	0.051245	0.001464	0.001462	0.214912	0.464912	0.697368	1	0.017544	0.24269	0.562865	0.80117	0.95614	0.089181	0.333333	0.495614	0.766082	0.99269	0.574561	0.38653	0.017544	0.23538	0.459064	0.711988	0.994152	0.342105
0.387097	0.335484	0.277419	0.279221	0.227273	0.181818	0.045161	0.309677	0.574194	0.748387	0.993548	0.012903	0.212903	0.470968	0.812903	1	0.006452	0.2	0.43871	0.645161	0.96129	0.503226	0.122581	0.374194	0.051948	0.077922	0	0.006452	0.335484	0.6	0.845161	1	0.019355	0.167742	0.2	0.63871	0.96129	0.045161	0.264516	0.412903	0.664516	0.76129	0.451613	0.402597	0.012903	0.193548	0.419355	0.670968	0.96129	0.348387
0.36831	0.307746	0.323944	0.212121	0.230444	0.206483	0.001408	0.234507	0.45	0.734507	0.999296	0.002113	0.273944	0.529577	0.748592	0.997183	0.000704	0.247183	0.505634	0.764789	1	0.538732	0.35493	0.106338	0.11346	0.03876	0.007752	0.000704	0.249296	0.502817	0.716901	1	0.009155	0.232394	0.467606	0.740141	0.933099	0.002113	0.25	0.673239	0.95493	0.998592	0.585915	0.283298	0.002113	0.25493	0.494366	0.761972	0.997887	0.347183
0.341584	0.386139	0.272277	0.273632	0.199005	0.19403	0.014851	0.267327	0.460396	0.69802	1	0.009901	0.183168	0.415842	0.752475	0.99505	0.00495	0.361386	0.594059	0.821782	0.990099	0.485149	0.173267	0.341584	0.059701	0.069652	0.0199	0.00495	0.153465	0.519802	0.712871	1	0.232673	0.292079	0.628713	0.945545	0.990099	0.039604	0.336634	0.435644	0.727723	0.920792	0.475248	0.41791	0.019802	0.346535	0.509901	0.747525	0.985149	0.371287
0.337766	0.329787	0.332447	0.205333	0.237333	0.24	0.029255	0.281915	0.518617	0.781915	0.989362	0.013298	0.207447	0.444149	0.702128	1	0.00266	0.242021	0.494681	0.742021	0.99734	0.281915	0.101064	0.617021	0.042667	0.117333	0.005333	0.00266	0.183511	0.329787	0.632979	1	0.045213	0.109043	0.196809	0.244681	0.367021	0.007979	0.417553	0.617021	0.81383	0.99734	0.606383	0.421333	0.005319	0.25	0.470745	0.736702	0.99734	0.353723
0.362934	0.378378	0.258687	0.290698	0.197674	0.158915	0.007722	0.23166	0.517375	0.76834	0.980695	0.011583	0.181467	0.382239	0.710425	0.996139	0.003861	0.355212	0.606178	0.752896	1	0.571429	0.196911	0.23166	0.046512	0.069767	0.015504	0.003861	0.146718	0.305019	0.633205	1	0.316602	0.401544	0.532819	0.756757	0.996139	0.023166	0.459459	0.671815	0.837838	0.942085	0.42471	0.317829	0.019305	0.3861	0.563707	0.737452	0.992278	0.409266
0.35	0.45	0.2	0.305439	0.125523	0.138075	0.008333	0.1875	0.5125	0.766667	1	0.029167	0.2375	0.420833	0.583333	0.9875	0.004167	0.575	0.725	0.85	0.995833	0.645833	0.083333	0.270833	0.033473	0.09205	0	0.004167	0.1875	0.366667	0.5625	1	0.575	0.666667	0.6875	0.733333	0.8875	0.0125	0.5125	0.779167	0.904167	0.979167	0.2875	0.292887	0.025	0.404167	0.683333	0.829167	0.983333	0.4875
0.337143	0.491429	0.171429	0.332378	0.174785	0.120344	0.008571	0.225714	0.431429	0.642857	1	0.005714	0.377143	0.682857	0.851429	0.994286	0.002857	0.154286	0.3	0.46	0.625714	0.585714	0.14	0.274286	0.045845	0.051576	0	0.002857	0.445714	0.665714	0.837143	1	0.028571	0.16	0.214286	0.425714	0.577143	0.077143	0.24	0.357143	0.471429	0.991429	0.428571	0.401146	0.014286	0.191429	0.391429	0.557143	0.925714	0.5
0.216567	0.502994	0.280439	0.155844	0.135864	0.308691	0.005988	0.316367	0.478044	0.611776	0.996008	0.001996	0.233533	0.552894	0.769461	1	0.000998	0.231537	0.474052	0.720559	0.999002	0.737525	0.132735	0.129741	0.053946	0.033966	0	0.000998	0.243513	0.52994	0.763473	1	0.001996	0.287425	0.463074	0.615768	0.999002	0.015968	0.316367	0.449102	0.597804	0.98503	0.583832	0.337662	0.001996	0.261477	0.58982	0.795409	0.999002	0.503992
0.23374	0.534553	0.231707	0.224033	0.118126	0.201629	0.004065	0.174797	0.357724	0.819106	0.995935	0.006098	0.315041	0.565041	0.745935	1	0.002033	0.215447	0.424797	0.723577	0.997967	0.554878	0.160569	0.284553	0.065173	0.044807	0.008147	0.002033	0.256098	0.50813	0.729675	1	0.067073	0.172764	0.365854	0.585366	0.934959	0.083333	0.207317	0.522358	0.863821	0.987805	0.520325	0.325866	0.01626	0.310976	0.583333	0.745935	0.969512	0.52439
0.409722	0.194444	0.395833	0.160839	0.307692	0.202797	0.013889	0.236111	0.458333	0.756944	1	0.048611	0.291667	0.548611	0.791667	0.979167	0.006944	0.215278	0.472222	0.673611	0.986111	0.361111	0.298611	0.340278	0.118881	0.076923	0.006993	0.006944	0.222222	0.451389	0.6875	1	0.041667	0.277778	0.5	0.722222	0.993056	0.069444	0.145833	0.534722	0.791667	0.909722	0.513889	0.48951	0.020833	0.215278	0.486111	0.729167	0.986111	0.201389
0.320495	0.352132	0.327373	0.199587	0.199587	0.251204	0.004127	0.275791	0.503439	0.748281	0.996561	0.001376	0.247593	0.5	0.746905	1	0.000688	0.227648	0.490371	0.755158	0.998624	0.536451	0.370702	0.092847	0.123882	0.033035	0.009635	0.000688	0.269601	0.502063	0.727648	1	0.002063	0.194635	0.428473	0.742779	0.935351	0.083906	0.457359	0.693948	0.957359	0.998624	0.600413	0.308328	0.001376	0.242091	0.482118	0.759285	0.997937	0.369326
0.397112	0.212996	0.389892	0.173913	0.344203	0.137681	0.00722	0.231047	0.516245	0.779783	1	0.01444	0.234657	0.458484	0.67509	0.98917	0.00361	0.249097	0.494585	0.765343	0.99278	0.379061	0.176895	0.444043	0.057971	0.101449	0	0.00361	0.187726	0.447653	0.703971	1	0.090253	0.32491	0.436823	0.642599	0.736462	0.01083	0.270758	0.523466	0.830325	0.99278	0.552347	0.391304	0.021661	0.249097	0.476534	0.66065	0.99278	0.216606
0.281421	0.442623	0.275956	0.221918	0.169863	0.271233	0.008197	0.234973	0.519126	0.70765	1	0.005464	0.215847	0.437158	0.740437	0.997268	0.002732	0.303279	0.540984	0.770492	0.989071	0.535519	0.155738	0.308743	0.049315	0.076712	0	0.002732	0.273224	0.407104	0.699454	1	0.128415	0.185792	0.527322	0.844262	0.920765	0.010929	0.248634	0.590164	0.808743	0.991803	0.387978	0.361644	0.038251	0.256831	0.622951	0.838798	0.991803	0.472678
0.337587	0.349188	0.313225	0.261324	0.207898	0.212544	0.00464	0.24826	0.470998	0.700696	0.99536	0.00232	0.213457	0.490719	0.75522	0.99884	0.00116	0.287703	0.537123	0.769142	1	0.515081	0.216937	0.267981	0.091754	0.049942	0.001161	0.00116	0.183295	0.429234	0.693735	1	0.0058	0.227378	0.527842	0.75522	0.99884	0.100928	0.400232	0.598608	0.796984	0.991879	0.529002	0.376307	0.00348	0.301624	0.580046	0.793503	0.99768	0.354988
0.315789	0.368421	0.315789	0.166667	0.204545	0.212121	0.015038	0.225564	0.503759	0.789474	1	0.022556	0.285714	0.473684	0.729323	0.992481	0.007519	0.210526	0.511278	0.699248	0.984962	0.368421	0.240602	0.390977	0.068182	0.083333	0.007576	0.007519	0.270677	0.451128	0.87218	1	0.052632	0.293233	0.390977	0.488722	0.714286	0.142857	0.233083	0.601504	0.789474	0.962406	0.413534	0.393939	0.030075	0.18797	0.413534	0.616541	0.857143	0.360902
0.378995	0.406393	0.214612	0.33945	0.174312	0.155963	0.013699	0.26484	0.493151	0.680365	0.995434	0.009132	0.315068	0.607306	0.799087	0.981735	0.004566	0.146119	0.3379	0.561644	1	0.52968	0.223744	0.246575	0.091743	0.055046	0	0.004566	0.242009	0.511416	0.684932	1	0.091324	0.26484	0.456621	0.69863	0.908676	0.022831	0.219178	0.515982	0.922374	0.986301	0.388128	0.357798	0.031963	0.255708	0.43379	0.716895	0.986301	0.410959
0.257692	0.498077	0.244231	0.22158	0.132948	0.204239	0.021154	0.280769	0.488462	0.676923	0.994231	0.003846	0.201923	0.492308	0.767308	1	0.001923	0.284615	0.513462	0.775	0.998077	0.675	0.130769	0.194231	0.05395	0.026975	0.011561	0.001923	0.213462	0.582692	0.763462	1	0.007692	0.321154	0.455769	0.901923	0.996154	0.063462	0.236538	0.373077	0.544231	0.990385	0.551923	0.308285	0.005769	0.278846	0.525	0.705769	0.998077	0.526923
0.365385	0.326923	0.307692	0.223301	0.281553	0.194175	0.019231	0.240385	0.480769	0.711538	0.990385	0.086538	0.25	0.567308	0.778846	1	0.009615	0.182692	0.461538	0.692308	0.961538	0.413462	0.298077	0.288462	0.106796	0.048544	0.009709	0.009615	0.288462	0.663462	0.798077	1	0.115385	0.365385	0.625	0.836538	0.961538	0.028846	0.144231	0.221154	0.461538	0.538462	0.346154	0.38835	0.028846	0.153846	0.413462	0.625	0.961538	0.336538
0.285036	0.534442	0.180523	0.283333	0.116667	0.154762	0.004751	0.19715	0.384798	0.63658	0.995249	0.016627	0.406176	0.631829	0.814727	0.997625	0.002375	0.125891	0.299287	0.501188	1	0.726841	0.149644	0.123515	0.059524	0.035714	0.002381	0.002375	0.437055	0.619952	0.807601	1	0.019002	0.114014	0.230404	0.330166	0.928741	0.009501	0.066508	0.263658	0.35867	0.895487	0.638955	0.242857	0.016627	0.36342	0.591449	0.767221	0.988124	0.505938
0.375566	0.321267	0.303167	0.254545	0.25	0.227273	0.0181	0.244344	0.533937	0.733032	1	0.013575	0.221719	0.425339	0.78733	0.995475	0.004525	0.248869	0.502262	0.705882	0.972851	0.21267	0	0.78733	0	0.109091	0	0.004525	0.117647	0.660633	0.873303	1	0	0	0	0	0	0.022624	0.262443	0.470588	0.710407	0.945701	0.506787	0.381818	0.045249	0.271493	0.538462	0.746606	0.972851	0.348416
0.479339	0.256198	0.264463	0.225	0.25	0.158333	0.016529	0.272727	0.603306	0.818182	1	0.033058	0.132231	0.404959	0.661157	0.975207	0.008264	0.247934	0.429752	0.669421	0.85124	0.396694	0.239669	0.363636	0.083333	0.083333	0.016667	0.008264	0.338843	0.553719	0.826446	1	0.033058	0.082645	0.404959	0.512397	0.760331	0.132231	0.214876	0.595041	0.710744	0.966942	0.429752	0.4	0.033058	0.214876	0.479339	0.652893	0.942149	0.214876
0.301325	0.403974	0.294702	0.212625	0.186047	0.245847	0.009934	0.31457	0.533113	0.761589	0.993377	0.013245	0.195364	0.463576	0.741722	0.996689	0.003311	0.18543	0.450331	0.718543	1	0.576159	0.274834	0.149007	0.086379	0.039867	0.006645	0.003311	0.274834	0.576159	0.781457	1	0.15894	0.364238	0.556291	0.854305	0.970199	0.013245	0.046358	0.082781	0.221854	0.629139	0.596026	0.285714	0.023179	0.195364	0.450331	0.758278	0.976821	0.400662
0.406452	0.258065	0.335484	0.181818	0.279221	0.181818	0.019355	0.245161	0.483871	0.741935	1	0.012903	0.264516	0.470968	0.677419	0.993548	0.006452	0.225806	0.496774	0.787097	0.974194	0.335484	0.270968	0.393548	0.097403	0.071429	0.019481	0.006452	0.187097	0.587097	0.767742	1	0.058065	0.277419	0.632258	0.890323	0.980645	0.019355	0.212903	0.387097	0.483871	0.825806	0.380645	0.467532	0.03871	0.219355	0.535484	0.748387	0.967742	0.264516
0.353646	0.328671	0.317682	0.238	0.229	0.198	0.008991	0.238761	0.481518	0.728272	1	0.001998	0.265734	0.511489	0.759241	0.995005	0.000999	0.234765	0.501499	0.737263	0.999001	0.458541	0.217782	0.323676	0.078	0.068	0.008	0.000999	0.257742	0.460539	0.696304	1	0.021978	0.317682	0.54046	0.751249	0.999001	0.007992	0.201798	0.585415	0.783217	0.989011	0.527473	0.36	0.002997	0.258741	0.548452	0.766234	0.998002	0.36963
0.419872	0.423077	0.157051	0.392283	0.151125	0.07717	0.012821	0.25641	0.535256	0.766026	1	0.00641	0.285256	0.516026	0.798077	0.99359	0.003205	0.108974	0.298077	0.544872	0.977564	0.685897	0.169872	0.144231	0.064309	0.032154	0	0.003205	0.317308	0.641026	0.820513	1	0.012821	0.125	0.224359	0.519231	0.964744	0.051282	0.147436	0.458333	0.564103	0.785256	0.358974	0.302251	0.009615	0.169872	0.320513	0.509615	0.977564	0.474359
0.374126	0.297203	0.328671	0.225919	0.255692	0.211909	0.006993	0.277972	0.527972	0.774476	1	0.003497	0.236014	0.508741	0.748252	0.996503	0.001748	0.237762	0.456294	0.694056	0.991259	0.40035	0.386364	0.213287	0.113835	0.064799	0.019264	0.001748	0.26049	0.533217	0.744755	1	0.020979	0.25	0.479021	0.70979	0.935315	0.034965	0.199301	0.435315	0.802448	0.994755	0.452797	0.409807	0.005245	0.26049	0.5	0.723776	0.991259	0.335664
0.376068	0.299145	0.324786	0.258621	0.25	0.189655	0.034188	0.230769	0.512821	0.777778	1	0.017094	0.222222	0.487179	0.65812	0.982906	0.008547	0.239316	0.461538	0.760684	0.965812	0.478632	0.435897	0.08547	0.094828	0.025862	0.008621	0.008547	0.162393	0.512821	0.717949	1	0.034188	0.299145	0.452991	0.606838	0.897436	0.119658	0.128205	0.91453	0.931624	0.957265	0.401709	0.586207	0.025641	0.25641	0.42735	0.726496	0.940171	0.316239
0.366667	0.406667	0.226667	0.255034	0.187919	0.187919	0.02	0.14	0.38	0.72	0.993333	0.013333	0.373333	0.553333	0.74	0.966667	0.006667	0.246667	0.42	0.713333	1	0.533333	0.273333	0.193333	0.107383	0.040268	0	0.006667	0.16	0.46	0.753333	1	0.026667	0.28	0.366667	0.693333	0.886667	0.146667	0.566667	0.613333	0.766667	0.82	0.44	0.348993	0.026667	0.34	0.533333	0.726667	0.946667	0.413333
0.346977	0.382326	0.270698	0.250466	0.17784	0.216015	0.00186	0.28093	0.538605	0.823256	0.996279	0.006512	0.185116	0.426977	0.72093	1	0.00093	0.300465	0.537674	0.705116	0.992558	0.619535	0.073488	0.306977	0.040037	0.062384	0.004655	0.00093	0.204651	0.421395	0.817674	1	0.021395	0.091163	0.274419	0.84186	0.996279	0.004651	0.490233	0.59814	0.707907	0.873488	0.555349	0.396648	0.006512	0.335814	0.541395	0.76	0.99814	0.382326
0.391685	0.40919	0.199125	0.313596	0.16886	0.125	0.010941	0.260394	0.424508	0.63895	0.997812	0.004376	0.33698	0.634573	0.798687	0.978118	0.002188	0.137856	0.310722	0.682713	1	0.689278	0.113786	0.196937	0.054825	0.050439	0.002193	0.002188	0.330416	0.59081	0.785558	1	0.159737	0.310722	0.654267	0.816193	0.989059	0.026258	0.080963	0.21663	0.391685	0.608315	0.396061	0.350877	0.008753	0.183807	0.63895	0.761488	0.989059	0.396061
0.364395	0.378303	0.257302	0.274373	0.193593	0.190808	0.009736	0.272601	0.545202	0.746871	0.998609	0.002782	0.289291	0.54242	0.788595	0.995828	0.001391	0.171071	0.382476	0.655076	1	0.694019	0.1363	0.16968	0.061281	0.041783	0.005571	0.001391	0.388039	0.625869	0.803894	1	0.004172	0.107093	0.230876	0.453408	0.973574	0.026426	0.161335	0.262865	0.411683	0.956885	0.577191	0.384401	0.004172	0.286509	0.568846	0.783032	0.997218	0.393602
0.29771	0.419847	0.282443	0.192308	0.161538	0.284615	0.022901	0.251908	0.580153	0.80916	0.992366	0.015267	0.229008	0.427481	0.671756	0.923664	0.007634	0.19084	0.480916	0.748092	1	0.526718	0.244275	0.229008	0.076923	0.046154	0	0.007634	0.221374	0.396947	0.839695	1	0.099237	0.183206	0.282443	0.603053	0.801527	0.40458	0.450382	0.51145	0.687023	0.984733	0.473282	0.4	0.068702	0.198473	0.419847	0.656489	0.977099	0.435115
0.456522	0.326087	0.217391	0.296703	0.263736	0.142857	0.021739	0.25	0.456522	0.717391	1	0.043478	0.217391	0.543478	0.706522	0.934783	0.01087	0.152174	0.391304	0.771739	0.978261	0.532609	0.326087	0.141304	0.175824	0.043956	0	0.01087	0.326087	0.597826	0.793478	1	0.021739	0.097826	0.228261	0.75	0.98913	0.380435	0.402174	0.434783	0.467391	0.576087	0.206522	0.373626	0.108696	0.184783	0.456522	0.75	0.956522	0.347826
0.381275	0.367707	0.251018	0.258152	0.177989	0.157609	0.006784	0.213026	0.518318	0.791045	1	0.004071	0.229308	0.458616	0.709634	0.998643	0.001357	0.299864	0.523745	0.724559	0.997286	0.400271	0.024423	0.575305	0.009511	0.099185	0.001359	0.001357	0.105834	0.459973	0.815468	1	0.056988	0.061058	0.876526	0.881954	0.924016	0.157395	0.327001	0.506106	0.690638	0.993216	0.431479	0.347826	0.016282	0.332429	0.503392	0.693351	0.994573	0.393487
0.325815	0.333333	0.340852	0.231156	0.223618	0.211055	0.007519	0.265664	0.513784	0.746867	1	0.005013	0.20802	0.518797	0.749373	0.997494	0.002506	0.225564	0.458647	0.736842	0.989975	0.338346	0.150376	0.511278	0.080402	0.095477	0.005025	0.002506	0.20802	0.54386	0.802005	1	0.045113	0.288221	0.538847	0.949875	0.992481	0.010025	0.26817	0.453634	0.714286	0.889724	0.596491	0.366834	0.012531	0.24812	0.471178	0.671679	0.987469	0.340852
0.385542	0.289157	0.325301	0.231707	0.256098	0.146341	0.072289	0.313253	0.554217	0.759036	0.927711	0.060241	0.349398	0.638554	0.915663	1	0.012048	0.144578	0.277108	0.518072	0.843373	0.385542	0.313253	0.301205	0.121951	0.04878	0	0.012048	0.313253	0.481928	0.903614	1	0.024096	0.084337	0.240964	0.349398	0.506024	0.53012	0.590361	0.662651	0.771084	0.855422	0.349398	0.414634	0.024096	0.168675	0.385542	0.518072	0.915663	0.301205
0.36129	0.383871	0.254839	0.275081	0.168285	0.203883	0.006452	0.23871	0.483871	0.735484	1	0.009677	0.229032	0.493548	0.770968	0.990323	0.003226	0.251613	0.496774	0.712903	0.993548	0.651613	0.077419	0.270968	0.032362	0.090615	0	0.003226	0.241935	0.522581	0.741935	1	0.248387	0.264516	0.674194	0.83871	0.993548	0.022581	0.209677	0.332258	0.709677	0.909677	0.309677	0.355987	0.009677	0.174194	0.448387	0.696774	0.993548	0.393548
0.35	0.377273	0.272727	0.242792	0.197269	0.212443	0.00303	0.233333	0.424242	0.739394	0.99697	0.006061	0.254545	0.574242	0.806061	0.995455	0.001515	0.20303	0.457576	0.674242	1	0.472727	0.127273	0.4	0.047041	0.08346	0.007587	0.001515	0.29697	0.607576	0.842424	1	0.036364	0.128788	0.345455	0.654545	0.990909	0.010606	0.263636	0.436364	0.625758	0.989394	0.509091	0.358118	0.004545	0.215152	0.475758	0.681818	0.993939	0.390909
0.23048	0.508937	0.260583	0.231638	0.140301	0.237288	0.009407	0.160865	0.416745	0.727187	1	0.001881	0.25682	0.486359	0.746943	0.999059	0.000941	0.345249	0.554092	0.775165	0.997178	0.658514	0.130762	0.210724	0.065913	0.043315	0.003766	0.000941	0.231421	0.441204	0.736595	1	0.143932	0.249294	0.468485	0.712135	0.947319	0.008467	0.278457	0.549389	0.837253	0.995296	0.607714	0.295669	0.006585	0.328316	0.530574	0.761054	0.997178	0.523048
0.452381	0.25	0.297619	0.277108	0.240964	0.13253	0.071429	0.309524	0.595238	0.761905	1	0.059524	0.321429	0.511905	0.72619	0.964286	0.011905	0.154762	0.27381	0.5	0.892857	0.380952	0.309524	0.309524	0.120482	0.072289	0	0.011905	0.309524	0.47619	0.904762	1	0.02381	0.083333	0.238095	0.345238	0.5	0.52381	0.583333	0.666667	0.809524	0.892857	0.369048	0.433735	0.02381	0.166667	0.392857	0.559524	0.892857	0.321429
0.49115	0.314159	0.19469	0.263858	0.146341	0.144124	0.00885	0.387168	0.659292	0.80531	1	0.004425	0.227876	0.415929	0.630531	0.997788	0.002212	0.152655	0.311947	0.480088	0.993363	0.679204	0.141593	0.179204	0.042129	0.064302	0.002217	0.002212	0.334071	0.637168	0.807522	1	0.013274	0.121681	0.188053	0.455752	0.993363	0.050885	0.15708	0.307522	0.411504	0.942478	0.314159	0.252772	0.019912	0.154867	0.263274	0.418142	0.995575	0.387168
0.329293	0.345455	0.325253	0.216599	0.234818	0.220648	0.008081	0.20404	0.484848	0.753535	1	0.00404	0.29697	0.557576	0.771717	0.99596	0.00202	0.226263	0.458586	0.69697	0.99798	0.531313	0.171717	0.29697	0.076923	0.040486	0	0.00202	0.220202	0.50303	0.745455	1	0.107071	0.311111	0.470707	0.670707	0.830303	0.074747	0.260606	0.620202	0.872727	0.987879	0.507071	0.287449	0.022222	0.333333	0.561616	0.713131	0.993939	0.371717
0.39823	0.348673	0.253097	0.237589	0.161348	0.159574	0.00531	0.306195	0.646018	0.861947	1	0.00354	0.20708	0.460177	0.715044	0.99115	0.00177	0.235398	0.40708	0.575221	0.943363	0.60354	0.166372	0.230088	0.051418	0.065603	0.005319	0.00177	0.307965	0.688496	0.838938	1	0.00531	0.215929	0.338053	0.578761	0.642478	0.030088	0.230088	0.4	0.486726	0.906195	0.361062	0.283688	0.00708	0.20708	0.366372	0.523894	0.688496	0.380531
0.563147	0.26501	0.171843	0.217842	0.157676	0.09751	0.004141	0.325052	0.544513	0.763975	1	0.014493	0.173913	0.36646	0.797101	0.995859	0.00207	0.20911	0.397516	0.587992	0.981366	0.540373	0.072464	0.387164	0.026971	0.093361	0.006224	0.00207	0.21118	0.608696	0.832298	1	0.026915	0.109731	0.196687	0.248447	0.556936	0.010352	0.380952	0.490683	0.73706	0.975155	0.256729	0.215768	0.028986	0.161491	0.250518	0.42029	0.981366	0.302277
0.492537	0.268657	0.238806	0.287879	0.363636	0.075758	0.029851	0.253731	0.462687	0.731343	1	0.044776	0.179104	0.507463	0.61194	0.955224	0.014925	0.208955	0.41791	0.686567	0.895522	0.19403	0	0.80597	0	0.090909	0	0.014925	0.044776	0.567164	0.940299	1	0	0	0	0	0	0.059701	0.268657	0.477612	0.716418	0.925373	0.313433	0.454545	0.089552	0.313433	0.432836	0.641791	0.895522	0.283582
0.382524	0.328155	0.28932	0.27821	0.208171	0.200389	0.005825	0.219417	0.47767	0.749515	0.998058	0.003883	0.260194	0.518447	0.737864	0.982524	0.001942	0.252427	0.479612	0.743689	1	0.568932	0.186408	0.24466	0.066148	0.058366	0.007782	0.001942	0.198058	0.574757	0.75534	1	0.01165	0.357282	0.499029	0.798058	0.996117	0.085437	0.273786	0.438835	0.625243	0.986408	0.48932	0.350195	0.013592	0.304854	0.524272	0.790291	0.996117	0.341748
0.363636	0.46281	0.173554	0.4	0.141667	0.1	0.016529	0.280992	0.570248	0.760331	1	0.033058	0.330579	0.578512	0.818182	0.991736	0.008264	0.132231	0.256198	0.347107	0.702479	0.61157	0.173554	0.214876	0.083333	0.066667	0	0.008264	0.231405	0.553719	0.842975	1	0.090909	0.123967	0.198347	0.280992	0.413223	0.454545	0.495868	0.694215	0.743802	0.809917	0.247934	0.266667	0.041322	0.181818	0.305785	0.371901	0.77686	0.487603
0.374233	0.312883	0.312883	0.234568	0.234568	0.203704	0.042945	0.226994	0.546012	0.797546	0.993865	0.018405	0.269939	0.503067	0.717791	1	0.006135	0.196319	0.453988	0.705521	0.97546	0.392638	0.165644	0.441718	0.080247	0.104938	0.018519	0.006135	0.282209	0.564417	0.754601	1	0.018405	0.196319	0.263804	0.343558	0.760736	0.02454	0.380368	0.539877	0.840491	0.98773	0.607362	0.333333	0.01227	0.257669	0.478528	0.687117	0.97546	0.343558
0.352941	0.333333	0.313725	0.230263	0.256579	0.243421	0.013072	0.254902	0.496732	0.751634	0.986928	0.03268	0.169935	0.339869	0.627451	0.993464	0.006536	0.359477	0.588235	0.79085	1	0.640523	0.176471	0.183007	0.052632	0.052632	0.013158	0.006536	0.169935	0.333333	0.575163	1	0.117647	0.503268	0.764706	0.810458	0.96732	0.019608	0.529412	0.633987	0.856209	0.901961	0.392157	0.394737	0.019608	0.267974	0.431373	0.718954	0.954248	0.339869
0.359375	0.317708	0.322917	0.230366	0.209424	0.26178	0.020833	0.244792	0.46875	0.755208	0.963542	0.010417	0.229167	0.489583	0.703125	0.989583	0.005208	0.25	0.510417	0.75	1	0.46875	0.208333	0.322917	0.109948	0.057592	0.005236	0.005208	0.317708	0.567708	0.713542	1	0.161458	0.338542	0.463542	0.755208	0.994792	0.015625	0.109375	0.307292	0.822917	0.96875	0.484375	0.460733	0.026042	0.270833	0.505208	0.734375	0.994792	0.307292
0.34188	0.358974	0.299145	0.215517	0.215517	0.224138	0.051282	0.213675	0.42735	0.709402	0.991453	0.017094	0.299145	0.615385	0.735043	1	0.008547	0.179487	0.444444	0.74359	0.982906	0.367521	0.179487	0.452991	0.086207	0.103448	0	0.008547	0.358974	0.57265	0.760684	1	0.025641	0.059829	0.393162	0.623932	0.820513	0.094017	0.196581	0.478632	0.709402	0.982906	0.512821	0.396552	0.034188	0.324786	0.512821	0.717949	0.982906	0.367521
0.312925	0.459184	0.227891	0.208191	0.116041	0.201365	0.047619	0.241497	0.452381	0.591837	1	0.006803	0.238095	0.588435	0.772109	0.993197	0.003401	0.302721	0.482993	0.789116	0.996599	0.721088	0.108844	0.170068	0.037543	0.030717	0.003413	0.003401	0.261905	0.578231	0.758503	1	0.064626	0.340136	0.387755	0.428571	0.482993	0.122449	0.159864	0.520408	0.887755	0.952381	0.411565	0.279863	0.010204	0.183673	0.656463	0.836735	0.986395	0.506803
0.315018	0.43956	0.245421	0.294118	0.154412	0.1875	0.007326	0.21978	0.424908	0.695971	0.981685	0.010989	0.227106	0.567766	0.81685	1	0.003663	0.249084	0.472527	0.699634	0.989011	0.626374	0.113553	0.260073	0.036765	0.051471	0	0.003663	0.186813	0.520147	0.842491	1	0.054945	0.527473	0.630037	0.688645	0.791209	0.091575	0.289377	0.380952	0.575092	0.74359	0.347985	0.352941	0.018315	0.201465	0.538462	0.699634	0.989011	0.428571
0.294118	0.372549	0.333333	0.16	0.18	0.32	0.058824	0.215686	0.54902	0.823529	1	0.039216	0.196078	0.509804	0.72549	0.980392	0.019608	0.176471	0.372549	0.529412	0.941176	0.470588	0.27451	0.254902	0.08	0.12	0	0.019608	0.196078	0.509804	0.843137	1	0.058824	0.098039	0.313725	0.372549	0.45098	0.529412	0.568627	0.627451	0.686275	0.901961	0.45098	0.4	0.078431	0.294118	0.411765	0.588235	0.941176	0.431373
0.389831	0.305085	0.305085	0.222222	0.273504	0.145299	0.025424	0.262712	0.508475	0.720339	0.991525	0.059322	0.372881	0.584746	0.822034	1	0.008475	0.161017	0.347458	0.669492	0.898305	0.423729	0.245763	0.330508	0.08547	0.051282	0	0.008475	0.254237	0.576271	0.737288	1	0.033898	0.220339	0.440678	0.542373	0.694915	0.101695	0.169492	0.364407	0.830508	0.915254	0.389831	0.410256	0.033898	0.211864	0.449153	0.728814	0.923729	0.254237
0.423913	0.336957	0.23913	0.351648	0.186813	0.175824	0.032609	0.195652	0.434783	0.728261	1	0.021739	0.173913	0.413043	0.695652	0.934783	0.01087	0.358696	0.521739	0.804348	0.978261	0.597826	0.032609	0.369565	0.043956	0.043956	0	0.01087	0.141304	0.293478	0.554348	1	0.380435	0.380435	0.380435	0.391304	0.586957	0.445652	0.521739	0.782609	0.869565	0.967391	0.358696	0.395604	0.130435	0.434783	0.597826	0.804348	0.934783	0.347826
0.317627	0.373473	0.308901	0.237762	0.197552	0.237762	0.00349	0.25829	0.511344	0.776614	1	0.006981	0.239092	0.486911	0.712042	0.989529	0.001745	0.240838	0.506108	0.759162	0.998255	0.488656	0.17801	0.333333	0.066434	0.073427	0.01049	0.001745	0.172775	0.418848	0.677138	1	0.005236	0.376963	0.631763	0.762653	0.933682	0.017452	0.315881	0.516579	0.78534	0.99651	0.535777	0.332168	0.005236	0.286213	0.47993	0.762653	0.986038	0.385689
0.323432	0.313531	0.363036	0.198675	0.264901	0.235099	0.009901	0.287129	0.570957	0.805281	0.993399	0.006601	0.240924	0.485149	0.752475	1	0.0033	0.191419	0.452145	0.653465	0.976898	0.478548	0.356436	0.165017	0.112583	0.05298	0.006623	0.0033	0.346535	0.646865	0.854785	1	0.013201	0.20462	0.379538	0.554455	0.980198	0.115512	0.155116	0.514851	0.729373	0.778878	0.50165	0.377483	0.013201	0.247525	0.448845	0.627063	0.983498	0.369637
0.311828	0.365591	0.322581	0.23913	0.184783	0.195652	0.043011	0.16129	0.451613	0.774194	1	0.021505	0.268817	0.645161	0.817204	0.978495	0.010753	0.258065	0.408602	0.602151	0.892473	0.505376	0.333333	0.16129	0.108696	0.043478	0.021739	0.010753	0.247312	0.731183	0.870968	1	0.258065	0.365591	0.483871	0.591398	0.774194	0.032258	0.107527	0.150538	0.193548	0.655914	0.451613	0.304348	0.096774	0.290323	0.451613	0.634409	0.903226	0.387097
0.435233	0.259067	0.305699	0.203125	0.291667	0.192708	0.015544	0.259067	0.502591	0.772021	1	0.010363	0.176166	0.435233	0.694301	0.984456	0.005181	0.248705	0.507772	0.73057	0.994819	0.455959	0.450777	0.093264	0.125	0.03125	0	0.005181	0.274611	0.580311	0.854922	1	0.015544	0.305699	0.492228	0.65285	0.906736	0.07772	0.093264	0.227979	0.248705	0.683938	0.42487	0.458333	0.025907	0.284974	0.46114	0.694301	0.911917	0.26943
0.387931	0.301724	0.310345	0.243478	0.217391	0.208696	0.034483	0.172414	0.508621	0.681034	1	0.025862	0.232759	0.422414	0.767241	0.991379	0.008621	0.293103	0.534483	0.724138	0.974138	0.396552	0.163793	0.439655	0.052174	0.104348	0	0.008621	0.189655	0.353448	0.758621	1	0.241379	0.267241	0.37931	0.422414	0.75	0.043103	0.439655	0.568966	0.836207	0.948276	0.439655	0.330435	0.068966	0.37069	0.534483	0.732759	0.974138	0.301724
0.310526	0.373684	0.315789	0.216931	0.195767	0.306878	0.042105	0.142105	0.426316	0.694737	0.973684	0.010526	0.242105	0.521053	0.726316	1	0.005263	0.294737	0.510526	0.773684	0.994737	0.373684	0.273684	0.352632	0.079365	0.100529	0.005291	0.005263	0.205263	0.531579	0.810526	1	0.142105	0.268421	0.357895	0.815789	0.931579	0.031579	0.110526	0.489474	0.7	0.863158	0.452632	0.42328	0.036842	0.278947	0.521053	0.763158	0.978947	0.389474
0.445652	0.206522	0.347826	0.175824	0.318681	0.153846	0.021739	0.206522	0.5	0.76087	1	0.119565	0.326087	0.554348	0.684783	0.891304	0.01087	0.195652	0.413043	0.73913	0.956522	0.423913	0.521739	0.054348	0.10989	0.021978	0.021978	0.01087	0.26087	0.48913	0.717391	1	0.065217	0.336957	0.521739	0.771739	0.978261	0.054348	0.054348	0.086957	0.097826	0.119565	0.369565	0.505495	0.065217	0.26087	0.478261	0.728261	0.967391	0.195652
0.309904	0.421725	0.268371	0.282051	0.163462	0.269231	0.009585	0.255591	0.501597	0.734824	1	0.00639	0.249201	0.485623	0.741214	0.990415	0.003195	0.239617	0.520767	0.753994	0.98722	0.488818	0.162939	0.348243	0.048077	0.067308	0.003205	0.003195	0.188498	0.386581	0.683706	1	0.162939	0.230032	0.517572	0.821086	0.907348	0.073482	0.300319	0.58147	0.785942	0.990415	0.412141	0.378205	0.031949	0.313099	0.603834	0.824281	0.990415	0.412141
0.34126	0.311534	0.347206	0.211905	0.264286	0.213095	0.003567	0.248514	0.483948	0.751486	0.995244	0.002378	0.241379	0.543401	0.776457	1	0.001189	0.250892	0.48038	0.709869	0.998811	0.454221	0.197384	0.348395	0.080952	0.085714	0.007143	0.001189	0.24019	0.487515	0.740785	1	0.005945	0.210464	0.428062	0.812128	0.902497	0.070155	0.262782	0.551724	0.758621	0.997622	0.521998	0.457143	0.004756	0.239001	0.488704	0.760999	0.998811	0.323424
0.339286	0.428571	0.232143	0.254545	0.218182	0.236364	0.053571	0.214286	0.375	0.785714	0.982143	0.035714	0.160714	0.464286	0.714286	1	0.017857	0.339286	0.482143	0.660714	0.964286	0.714286	0.160714	0.125	0.109091	0.072727	0	0.017857	0.25	0.553571	0.767857	1	0.285714	0.303571	0.446429	0.482143	0.607143	0.089286	0.089286	0.125	0.875	0.910714	0.25	0.472727	0.267857	0.339286	0.517857	0.696429	0.964286	0.446429
0.381022	0.329927	0.289051	0.249817	0.22279	0.191381	0.00219	0.275912	0.529927	0.776642	1	0.00146	0.19635	0.443066	0.723358	0.99927	0.00073	0.265693	0.510949	0.743796	0.978832	0.380292	0.066423	0.553285	0.030679	0.071585	0.004383	0.00073	0.167153	0.432117	0.731387	1	0.027737	0.143796	0.391241	0.7	0.956934	0.008029	0.289781	0.535036	0.773723	0.99562	0.449635	0.407597	0.006569	0.258394	0.471533	0.734307	0.978832	0.340876
0.385787	0.360406	0.253807	0.265306	0.209184	0.153061	0.015228	0.238579	0.558376	0.832487	1	0.010152	0.248731	0.467005	0.71066	0.979695	0.005076	0.182741	0.390863	0.675127	0.949239	0.385787	0.208122	0.406091	0.061224	0.061224	0	0.005076	0.147208	0.436548	0.715736	1	0.030457	0.076142	0.324873	0.685279	0.959391	0.167513	0.390863	0.609137	0.791878	0.893401	0.416244	0.459184	0.035533	0.22335	0.411168	0.654822	0.949239	0.390863
0.319635	0.328767	0.351598	0.229358	0.206422	0.229358	0.009132	0.242009	0.493151	0.762557	1	0.027397	0.255708	0.406393	0.634703	0.981735	0.004566	0.214612	0.575342	0.789954	0.986301	0.515982	0.173516	0.310502	0.073394	0.055046	0	0.004566	0.292237	0.420091	0.703196	1	0.009132	0.050228	0.13242	0.744292	0.931507	0.16895	0.242009	0.579909	0.808219	0.986301	0.506849	0.394495	0.013699	0.242009	0.52968	0.785388	0.986301	0.310502
0.440217	0.375	0.184783	0.305177	0.158038	0.119891	0.01087	0.195652	0.527174	0.758152	0.994565	0.005435	0.252717	0.429348	0.638587	0.991848	0.002717	0.413043	0.589674	0.766304	1	0.48913	0.070652	0.440217	0.038147	0.087193	0	0.002717	0.163043	0.334239	0.61413	1	0.105978	0.402174	0.486413	0.565217	0.951087	0.016304	0.38587	0.660326	0.782609	0.997283	0.258152	0.294278	0.024457	0.415761	0.565217	0.722826	0.98913	0.4375
0.451939	0.298482	0.249578	0.280405	0.206081	0.179054	0.008432	0.273187	0.499157	0.730185	0.996627	0.003373	0.264755	0.475548	0.745363	0.998314	0.001686	0.220911	0.51602	0.772344	1	0.51602	0.129848	0.354132	0.054054	0.084459	0	0.001686	0.234401	0.460371	0.655987	1	0.11973	0.219224	0.337268	0.790894	0.991568	0.016863	0.300169	0.625632	0.865093	0.984823	0.318718	0.361486	0.005059	0.175379	0.504216	0.79258	0.993255	0.338954
0.349593	0.406504	0.243902	0.226069	0.181263	0.189409	0.006098	0.21748	0.481707	0.697154	0.993902	0.004065	0.270325	0.565041	0.778455	0.995935	0.002033	0.268293	0.455285	0.711382	1	0.603659	0.103659	0.292683	0.03666	0.089613	0.004073	0.002033	0.221545	0.518293	0.776423	1	0.030488	0.26626	0.380081	0.528455	0.955285	0.028455	0.24187	0.449187	0.713415	0.932927	0.392276	0.362525	0.028455	0.24187	0.46748	0.73374	0.997967	0.418699
0.345932	0.363717	0.290351	0.242883	0.205961	0.207295	0.003112	0.266785	0.536683	0.738995	1	0.000889	0.241885	0.470431	0.752334	0.998666	0.000445	0.228991	0.489551	0.767452	0.998221	0.501112	0.102268	0.396621	0.047153	0.08452	0.003559	0.000445	0.30458	0.53446	0.746109	1	0.001779	0.251667	0.435305	0.603824	0.986661	0.008004	0.185416	0.468208	0.781236	0.996443	0.501112	0.395018	0.001334	0.242775	0.494442	0.767452	0.998221	0.392174
0.352717	0.341277	0.306006	0.212786	0.228053	0.22042	0.00572	0.285033	0.508103	0.769304	0.999047	0.001907	0.22307	0.485224	0.730219	0.996187	0.000953	0.242135	0.490944	0.716873	1	0.319352	0.102955	0.577693	0.039122	0.08874	0.002863	0.000953	0.335558	0.522402	0.754051	1	0.225929	0.442326	0.645377	0.703527	0.931363	0.00858	0.182078	0.382269	0.748332	0.999047	0.502383	0.391221	0.009533	0.239276	0.510963	0.743565	0.99428	0.375596
0.40724	0.276018	0.316742	0.245455	0.240909	0.154545	0.00905	0.280543	0.579186	0.773756	1	0.054299	0.20362	0.502262	0.760181	0.995475	0.004525	0.226244	0.420814	0.633484	0.9819	0.316742	0.095023	0.588235	0.040909	0.086364	0.004545	0.004525	0.153846	0.447964	0.755656	1	0.117647	0.773756	0.828054	0.850679	0.886878	0.0181	0.235294	0.470588	0.633484	0.986425	0.502262	0.363636	0.0181	0.21267	0.434389	0.628959	0.9819	0.244344
0.295302	0.422819	0.281879	0.277027	0.168919	0.256757	0.073826	0.422819	0.590604	0.738255	0.986577	0.020134	0.161074	0.409396	0.758389	1	0.006711	0.234899	0.442953	0.697987	0.959732	0.61745	0.288591	0.09396	0.060811	0.02027	0.006757	0.006711	0.214765	0.510067	0.771812	1	0.33557	0.395973	0.503356	0.691275	0.818792	0.040268	0.053691	0.080537	0.825503	0.852349	0.33557	0.472973	0.040268	0.268456	0.456376	0.684564	0.926174	0.422819
0.324042	0.412892	0.263066	0.26178	0.148342	0.230366	0.005226	0.290941	0.517422	0.745645	1	0.003484	0.249129	0.583624	0.799652	0.998258	0.001742	0.200348	0.372822	0.585366	0.994774	0.529617	0.148084	0.3223	0.052356	0.073298	0.006981	0.001742	0.336237	0.679443	0.8223	1	0.085366	0.278746	0.409408	0.574913	0.958188	0.019164	0.172474	0.355401	0.527875	0.994774	0.445993	0.279232	0.019164	0.19338	0.372822	0.578397	0.994774	0.439024
0.389091	0.4	0.210909	0.306569	0.160584	0.178832	0.007273	0.269091	0.516364	0.752727	0.996364	0.018182	0.250909	0.505455	0.781818	1	0.003636	0.207273	0.450909	0.614545	0.934545	0.494545	0.072727	0.432727	0.043796	0.072993	0	0.003636	0.163636	0.421818	0.810909	1	0.010909	0.083636	0.178182	0.276364	0.418182	0.12	0.429091	0.6	0.709091	0.930909	0.298182	0.306569	0.010909	0.254545	0.512727	0.647273	0.963636	0.385455
0.376923	0.269231	0.353846	0.185328	0.285714	0.204633	0.007692	0.219231	0.461538	0.715385	0.992308	0.015385	0.273077	0.526923	0.753846	1	0.003846	0.265385	0.511538	0.75	0.980769	0.25	0.065385	0.684615	0.019305	0.104247	0.011583	0.003846	0.284615	0.696154	0.823077	1	0.711538	0.753846	0.792308	0.807692	0.919231	0.015385	0.207692	0.411538	0.603846	0.984615	0.492308	0.416988	0.011538	0.253846	0.488462	0.734615	0.965385	0.273077
0.331412	0.391931	0.276657	0.291908	0.196532	0.205202	0.005764	0.221902	0.455331	0.731988	1	0.017291	0.25072	0.510086	0.78098	0.994236	0.002882	0.236311	0.51585	0.73487	0.988473	0.299712	0.288184	0.412104	0.078035	0.072254	0.00289	0.002882	0.319885	0.501441	0.729107	1	0.123919	0.342939	0.489914	0.639769	0.933718	0.008646	0.227666	0.538905	0.861671	0.994236	0.501441	0.358382	0.011527	0.270893	0.530259	0.740634	0.991354	0.420749
0.405567	0.266402	0.328032	0.217131	0.292829	0.175299	0.005964	0.250497	0.469185	0.741551	0.998012	0.003976	0.220676	0.491054	0.72167	1	0.001988	0.282306	0.520875	0.753479	0.994036	0.377734	0.198807	0.423459	0.057769	0.073705	0.005976	0.001988	0.153082	0.353877	0.628231	1	0.097416	0.28827	0.375746	0.479125	0.779324	0.047714	0.427435	0.701789	0.842942	0.986083	0.485089	0.434263	0.007952	0.282306	0.500994	0.725646	0.992048	0.298211
0.329365	0.39881	0.271825	0.272366	0.192843	0.182903	0.005952	0.230159	0.468254	0.755952	0.998016	0.019841	0.202381	0.448413	0.71627	1	0.001984	0.35119	0.559524	0.785714	0.996032	0.464286	0.073413	0.462302	0.027833	0.087475	0.003976	0.001984	0.130952	0.339286	0.666667	1	0.599206	0.662698	0.839286	0.89881	0.974206	0.007937	0.349206	0.511905	0.75	0.996032	0.376984	0.290258	0.003968	0.515873	0.678571	0.847222	0.996032	0.44246
0.383178	0.35514	0.261682	0.28169	0.234742	0.201878	0.014019	0.219626	0.528037	0.775701	0.995327	0.009346	0.285047	0.5	0.724299	1	0.004673	0.228972	0.481308	0.682243	0.990654	0.415888	0.116822	0.46729	0.056338	0.103286	0	0.004673	0.191589	0.476636	0.682243	1	0.158879	0.182243	0.228972	0.285047	0.607477	0.056075	0.392523	0.635514	0.803738	0.985981	0.565421	0.347418	0.018692	0.247664	0.429907	0.602804	0.915888	0.32243
0.376344	0.290323	0.333333	0.219424	0.26259	0.172662	0.007168	0.25448	0.494624	0.727599	0.978495	0.02509	0.243728	0.544803	0.777778	1	0.003584	0.240143	0.458781	0.709677	0.97491	0.387097	0.168459	0.444444	0.05036	0.086331	0	0.003584	0.193548	0.455197	0.698925	1	0.16129	0.258065	0.390681	0.591398	0.681004	0.007168	0.225806	0.498208	0.799283	0.960573	0.55914	0.417266	0.017921	0.243728	0.46595	0.666667	0.97491	0.297491
0.316327	0.459184	0.22449	0.267894	0.161554	0.198364	0.006122	0.312245	0.559184	0.730612	0.985714	0.004082	0.202041	0.391837	0.757143	0.997959	0.002041	0.285714	0.546939	0.744898	1	0.706122	0.114286	0.179592	0.047035	0.063395	0.002045	0.002041	0.216327	0.426531	0.787755	1	0.016327	0.318367	0.497959	0.702041	0.785714	0.057143	0.444898	0.616327	0.734694	0.938776	0.440816	0.368098	0.010204	0.255102	0.502041	0.734694	0.993878	0.453061
0.348457	0.350272	0.30127	0.250909	0.201818	0.218182	0.016334	0.274047	0.551724	0.818512	1	0.00363	0.235935	0.517241	0.738657	0.99274	0.001815	0.23049	0.441016	0.656987	0.99637	0.479129	0.07078	0.450091	0.023636	0.081818	0.005455	0.001815	0.263158	0.642468	0.836661	1	0.056261	0.07078	0.190563	0.566243	0.764065	0.005445	0.299456	0.46098	0.624319	0.989111	0.515426	0.309091	0.00726	0.235935	0.466425	0.646098	0.99637	0.388385
0.357143	0.326531	0.316327	0.309278	0.226804	0.216495	0.05102	0.244898	0.489796	0.714286	0.979592	0.030612	0.326531	0.561224	0.806122	1	0.010204	0.112245	0.316327	0.693878	0.989796	0.530612	0.469388	0	0.123711	0	0	0.010204	0.142857	0.367347	0.714286	1	0.102041	0.387755	0.571429	0.795918	0.989796	0	0	0	0	0	0.428571	0.43299	0.040816	0.132653	0.397959	0.653061	0.959184	0.27551
0.33377	0.328534	0.337696	0.195282	0.242464	0.241153	0.002618	0.294503	0.526178	0.756545	0.998691	0.005236	0.240838	0.469895	0.751309	1	0.001309	0.222513	0.497382	0.740838	0.997382	0.467277	0.218586	0.314136	0.087811	0.058978	0.001311	0.001309	0.21466	0.441099	0.727749	1	0.040576	0.153141	0.498691	0.820681	0.997382	0.006545	0.328534	0.531414	0.710733	0.990838	0.574607	0.40367	0.003927	0.239529	0.472513	0.744764	0.997382	0.337696
0.344322	0.379121	0.276557	0.247706	0.19633	0.190826	0.005495	0.241758	0.525641	0.74359	0.994505	0.003663	0.161172	0.404762	0.750916	1	0.001832	0.347985	0.542125	0.749084	0.992674	0.532967	0.152015	0.315018	0.056881	0.06422	0.005505	0.001832	0.135531	0.283883	0.652015	1	0.227106	0.490842	0.64652	0.809524	0.915751	0.038462	0.423077	0.580586	0.785714	0.990842	0.492674	0.366972	0.010989	0.364469	0.542125	0.763736	0.990842	0.443223
0.374172	0.304636	0.321192	0.232558	0.259136	0.192691	0.009934	0.304636	0.516556	0.764901	0.996689	0.006623	0.178808	0.506623	0.778146	0.990066	0.003311	0.228477	0.453642	0.695364	1	0.5	0.195364	0.304636	0.07309	0.046512	0.019934	0.003311	0.304636	0.582781	0.824503	1	0.072848	0.142384	0.569536	0.695364	0.887417	0.029801	0.245033	0.377483	0.559603	0.870861	0.427152	0.358804	0.023179	0.235099	0.496689	0.675497	0.950331	0.360927
0.397576	0.345455	0.25697	0.256068	0.199029	0.163835	0.006061	0.306667	0.58303	0.803636	1	0.002424	0.220606	0.464242	0.718788	0.995152	0.001212	0.21697	0.398788	0.667879	0.997576	0.446061	0.124848	0.429091	0.052184	0.076456	0.003641	0.001212	0.236364	0.569697	0.740606	1	0.048485	0.246061	0.395152	0.574545	0.97697	0.030303	0.253333	0.521212	0.755152	0.996364	0.390303	0.300971	0.042424	0.214545	0.379394	0.552727	0.996364	0.397576
0.318264	0.385172	0.296564	0.228261	0.199275	0.226449	0.01085	0.244123	0.468354	0.76311	0.994575	0.003617	0.253165	0.520796	0.759494	1	0.001808	0.240506	0.481013	0.712477	0.998192	0.481013	0.063291	0.455696	0.019928	0.077899	0.005435	0.001808	0.249548	0.636528	0.831826	1	0.056058	0.068716	0.206148	0.381555	0.942134	0.005425	0.305606	0.468354	0.650995	0.985533	0.533454	0.358696	0.007233	0.233273	0.471971	0.654611	0.990958	0.396022
0.320513	0.316239	0.363248	0.175966	0.23176	0.253219	0.008547	0.217949	0.482906	0.794872	1	0.012821	0.303419	0.517094	0.74359	0.995726	0.004274	0.239316	0.474359	0.692308	0.987179	0.504274	0.367521	0.128205	0.154506	0.060086	0.008584	0.004274	0.235043	0.57265	0.773504	1	0.021368	0.200855	0.474359	0.606838	0.965812	0.042735	0.363248	0.397436	0.803419	0.918803	0.538462	0.386266	0.012821	0.239316	0.5	0.717949	0.982906	0.337607
0.330827	0.463659	0.205514	0.272271	0.150565	0.146801	0.003759	0.238095	0.449875	0.695489	1	0.002506	0.209273	0.482456	0.815789	0.998747	0.001253	0.390977	0.571429	0.724311	0.997494	0.661654	0.114035	0.224311	0.046424	0.048934	0.003764	0.001253	0.180451	0.360902	0.778195	1	0.005013	0.47619	0.617794	0.736842	0.830827	0.017544	0.446115	0.591479	0.726817	0.870927	0.52381	0.33877	0.005013	0.274436	0.536341	0.754386	0.997494	0.469925
0.386905	0.321429	0.291667	0.251497	0.215569	0.215569	0.029762	0.255952	0.434524	0.630952	0.964286	0.011905	0.303571	0.577381	0.779762	0.982143	0.005952	0.190476	0.47619	0.77381	1	0.434524	0.339286	0.22619	0.149701	0.053892	0.005988	0.005952	0.386905	0.52381	0.708333	1	0.142857	0.321429	0.565476	0.833333	0.994048	0.029762	0.077381	0.202381	0.64881	0.934524	0.505952	0.371257	0.029762	0.238095	0.571429	0.791667	0.994048	0.309524
0.387781	0.284289	0.32793	0.208489	0.278402	0.179775	0.002494	0.253117	0.508728	0.760599	0.998753	0.004988	0.219451	0.445137	0.735661	1	0.001247	0.260599	0.516209	0.744389	0.997506	0.456359	0.249377	0.294264	0.099875	0.057428	0.002497	0.001247	0.23192	0.483791	0.745636	1	0.038653	0.170823	0.415212	0.78803	0.997506	0.006234	0.322943	0.573566	0.761845	0.991272	0.562344	0.39201	0.003741	0.269327	0.472569	0.738155	0.997506	0.336658
0.347826	0.365217	0.286957	0.307018	0.201754	0.210526	0.043478	0.217391	0.495652	0.747826	0.982609	0.017391	0.191304	0.469565	0.756522	1	0.008696	0.278261	0.504348	0.66087	0.991304	0.504348	0.234783	0.26087	0.096491	0.061404	0.008772	0.008696	0.121739	0.434783	0.773913	1	0.391304	0.6	0.66087	0.843478	0.947826	0.173913	0.226087	0.347826	0.521739	0.965217	0.330435	0.368421	0.130435	0.278261	0.530435	0.66087	0.965217	0.373913
0.337079	0.41573	0.247191	0.278873	0.15493	0.216901	0.005618	0.230337	0.474719	0.755618	0.997191	0.008427	0.27809	0.542135	0.764045	0.988764	0.002809	0.219101	0.469101	0.716292	1	0.542135	0.168539	0.289326	0.070423	0.053521	0.008451	0.002809	0.272472	0.530899	0.794944	1	0.087079	0.148876	0.491573	0.733146	0.977528	0.05618	0.247191	0.441011	0.679775	0.896067	0.424157	0.383099	0.022472	0.241573	0.438202	0.69382	0.994382	0.455056
0.298343	0.439227	0.262431	0.246537	0.166205	0.213296	0.008287	0.298343	0.533149	0.803867	1	0.005525	0.207182	0.455801	0.743094	0.997238	0.002762	0.273481	0.5	0.720994	0.991713	0.502762	0.11326	0.383978	0.066482	0.121884	0	0.002762	0.212707	0.436464	0.726519	1	0.013812	0.171271	0.417127	0.571823	0.690608	0.066298	0.345304	0.599448	0.823204	0.991713	0.480663	0.415512	0.01105	0.245856	0.447514	0.68232	0.991713	0.417127
0.318681	0.412088	0.269231	0.287293	0.176796	0.259669	0.016484	0.274725	0.604396	0.796703	0.983516	0.010989	0.208791	0.43956	0.730769	1	0.005495	0.214286	0.467033	0.675824	0.950549	0.39011	0.406593	0.203297	0.154696	0.033149	0	0.005495	0.214286	0.571429	0.868132	1	0.016484	0.159341	0.472527	0.659341	0.961538	0.335165	0.379121	0.428571	0.796703	0.851648	0.461538	0.464088	0.032967	0.373626	0.510989	0.697802	0.950549	0.450549
0.336	0.4192	0.2448	0.258013	0.152244	0.189103	0.0144	0.2976	0.5424	0.7664	0.9984	0.0032	0.2576	0.592	0.8224	1	0.0016	0.2096	0.3584	0.5344	0.9408	0.5872	0.1152	0.2976	0.041667	0.076923	0.003205	0.0016	0.2896	0.6848	0.8432	1	0.1216	0.2576	0.4016	0.5264	0.6048	0.016	0.1872	0.3648	0.536	0.9952	0.4032	0.307692	0.0192	0.2176	0.3776	0.5568	0.976	0.4192
0.372093	0.302326	0.325581	0.341176	0.211765	0.176471	0.034884	0.244186	0.523256	0.732558	1	0.023256	0.162791	0.395349	0.651163	0.988372	0.011628	0.313953	0.534884	0.755814	0.965116	0.348837	0.244186	0.406977	0.094118	0.047059	0	0.011628	0.244186	0.418605	0.906977	1	0.046512	0.337209	0.44186	0.5	0.604651	0.081395	0.162791	0.686047	0.790698	0.895349	0.430233	0.423529	0.046512	0.290698	0.453488	0.686047	0.965116	0.337209
0.445783	0.337349	0.216867	0.353659	0.219512	0.134146	0.036145	0.240964	0.481928	0.698795	1	0.024096	0.228916	0.457831	0.759036	0.987952	0.012048	0.13253	0.590361	0.686747	0.951807	0.240964	0	0.759036	0	0.097561	0	0.012048	0.493976	0.759036	0.819277	1	0	0	0	0	0	0.048193	0.216867	0.421687	0.674699	0.975904	0.325301	0.463415	0.048193	0.253012	0.457831	0.650602	0.939759	0.361446
0.417476	0.38835	0.194175	0.343137	0.147059	0.156863	0.048544	0.203883	0.436893	0.699029	0.980583	0.019417	0.271845	0.485437	0.796117	1	0.009709	0.320388	0.582524	0.728155	0.941748	0.223301	0.009709	0.76699	0.019608	0.058824	0	0.009709	0.048544	0.106796	0.718447	1	0.737864	0.737864	0.737864	0.737864	0.737864	0.126214	0.300971	0.524272	0.786408	0.980583	0.262136	0.392157	0.126214	0.359223	0.572816	0.68932	0.951456	0.436893
0.320755	0.396226	0.283019	0.247619	0.219048	0.190476	0.09434	0.226415	0.575472	0.745283	1	0.018868	0.283019	0.528302	0.801887	0.981132	0.009434	0.188679	0.377358	0.59434	0.943396	0.424528	0.575472	0	0.171429	0	0	0.009434	0.292453	0.613208	0.792453	1	0.018868	0.198113	0.386792	0.669811	0.95283	0	0	0	0	0	0.358491	0.47619	0.018868	0.188679	0.443396	0.679245	0.943396	0.339623
0.344086	0.333333	0.322581	0.282609	0.206522	0.304348	0.032258	0.290323	0.526882	0.698925	1	0.021505	0.215054	0.451613	0.83871	0.989247	0.010753	0.204301	0.483871	0.655914	0.946237	0.333333	0.365591	0.301075	0.130435	0.043478	0	0.010753	0.11828	0.419355	0.784946	1	0.053763	0.365591	0.698925	0.860215	0.956989	0.150538	0.215054	0.430108	0.505376	0.580645	0.526882	0.326087	0.053763	0.215054	0.397849	0.602151	0.946237	0.354839
0.421505	0.337634	0.24086	0.297414	0.252155	0.155172	0.006452	0.27957	0.546237	0.744086	1	0.004301	0.24086	0.462366	0.812903	0.997849	0.002151	0.206452	0.445161	0.675269	0.888172	0.376344	0.139785	0.483871	0.034483	0.077586	0	0.002151	0.253763	0.470968	0.898925	1	0.008602	0.227957	0.275269	0.387097	0.494624	0.043011	0.296774	0.595699	0.746237	0.931183	0.372043	0.49569	0.008602	0.227957	0.453763	0.713978	0.980645	0.36129
0.35443	0.386076	0.259494	0.299363	0.197452	0.203822	0.025316	0.183544	0.525316	0.746835	0.993671	0.056962	0.234177	0.405063	0.727848	1	0.006329	0.303797	0.531646	0.721519	0.93038	0.575949	0.189873	0.234177	0.076433	0.038217	0.012739	0.006329	0.14557	0.322785	0.468354	1	0.28481	0.481013	0.702532	0.778481	0.936709	0.031646	0.537975	0.594937	0.848101	0.974684	0.481013	0.343949	0.101266	0.310127	0.487342	0.71519	0.955696	0.360759
0.28363	0.458671	0.257699	0.23539	0.167208	0.211039	0.003241	0.333874	0.549433	0.764992	0.983793	0.004862	0.19611	0.439222	0.748784	1	0.001621	0.28363	0.487844	0.71799	0.996759	0.675851	0.111831	0.212318	0.053571	0.056818	0.001623	0.001621	0.212318	0.453809	0.753647	1	0.037277	0.371151	0.539708	0.692058	0.952998	0.004862	0.23987	0.555916	0.779579	0.983793	0.452188	0.36039	0.008104	0.215559	0.491086	0.740681	0.990276	0.442464
0.393443	0.360656	0.245902	0.366667	0.166667	0.15	0.04918	0.213115	0.459016	0.737705	0.967213	0.032787	0.163934	0.327869	0.606557	1	0.016393	0.42623	0.672131	0.770492	0.934426	0.639344	0.016393	0.344262	0.033333	0.1	0	0.016393	0.147541	0.360656	0.540984	1	0.442623	0.442623	0.442623	0.442623	0.442623	0.278689	0.590164	0.704918	0.786885	0.885246	0.311475	0.366667	0.344262	0.47541	0.655738	0.770492	0.934426	0.442623
0.441441	0.297297	0.261261	0.290909	0.163636	0.127273	0.018018	0.288288	0.486486	0.747748	0.981982	0.063063	0.261261	0.495495	0.675676	0.990991	0.009009	0.207207	0.351351	0.684685	1	0.45045	0.54955	0	0.181818	0	0	0.009009	0.18018	0.477477	0.711712	1	0.036036	0.243243	0.567568	0.792793	0.990991	0	0	0	0	0	0.441441	0.290909	0.036036	0.243243	0.54955	0.675676	0.936937	0.315315
0.32964	0.454294	0.216066	0.302778	0.144444	0.169444	0.00554	0.310249	0.556787	0.770083	1	0.019391	0.210526	0.421053	0.731302	0.99723	0.00277	0.32687	0.520776	0.725762	0.99446	0.66759	0.091413	0.240997	0.05	0.061111	0.011111	0.00277	0.229917	0.493075	0.750693	1	0.33241	0.470914	0.506925	0.725762	0.99169	0.00831	0.171745	0.457064	0.795014	0.98892	0.34626	0.35	0.022161	0.246537	0.498615	0.714681	0.99446	0.468144
0.483221	0.278523	0.238255	0.228956	0.232323	0.141414	0.013423	0.197987	0.496644	0.761745	1	0.006711	0.248322	0.520134	0.795302	0.996644	0.003356	0.291946	0.479866	0.677852	0.939597	0.520134	0.134228	0.345638	0.047138	0.080808	0.013468	0.003356	0.157718	0.449664	0.738255	1	0.325503	0.456376	0.61745	0.674497	0.919463	0.013423	0.278523	0.503356	0.802013	0.95302	0.305369	0.296296	0.020134	0.318792	0.459732	0.66443	0.942953	0.338926
0.336788	0.357513	0.305699	0.270833	0.25	0.223958	0.015544	0.202073	0.476684	0.746114	0.994819	0.010363	0.243523	0.466321	0.725389	1	0.005181	0.274611	0.497409	0.735751	0.927461	0.440415	0.450777	0.108808	0.125	0.03125	0	0.005181	0.238342	0.590674	0.839378	1	0.020725	0.331606	0.497409	0.678756	0.932642	0.093264	0.11399	0.248705	0.274611	0.715026	0.440415	0.479167	0.025907	0.274611	0.476684	0.704663	0.937824	0.378238
0.382609	0.365217	0.252174	0.27193	0.219298	0.105263	0.017391	0.234783	0.426087	0.695652	0.973913	0.113043	0.382609	0.652174	0.852174	1	0.008696	0.104348	0.356522	0.6	0.913043	0.443478	0.478261	0.078261	0.175439	0.017544	0	0.008696	0.165217	0.452174	0.678261	1	0.069565	0.217391	0.382609	0.695652	0.878261	0.913043	0.921739	0.93913	0.956522	0.982609	0.443478	0.333333	0.026087	0.226087	0.495652	0.626087	0.965217	0.408696
0.408935	0.305842	0.285223	0.208262	0.277108	0.163511	0.006873	0.218213	0.498282	0.721649	0.994845	0.003436	0.249141	0.544674	0.852234	0.998282	0.001718	0.276632	0.465636	0.689003	1	0.503436	0.121993	0.37457	0.043029	0.08778	0.008606	0.001718	0.281787	0.546392	0.852234	1	0.072165	0.295533	0.333333	0.699313	0.969072	0.013746	0.176976	0.455326	0.627148	0.967354	0.439863	0.371773	0.022337	0.30756	0.494845	0.702749	0.984536	0.353952
0.408654	0.278846	0.3125	0.21256	0.2657	0.164251	0.014423	0.259615	0.5	0.778846	1	0.009615	0.173077	0.418269	0.639423	0.971154	0.004808	0.307692	0.514423	0.75	0.990385	0.475962	0.149038	0.375	0.062802	0.072464	0.033816	0.004808	0.149038	0.514423	0.711538	1	0.230769	0.293269	0.596154	0.697115	0.961538	0.038462	0.346154	0.456731	0.745192	0.985577	0.461538	0.396135	0.019231	0.360577	0.514423	0.745192	0.975962	0.254808
0.309859	0.330986	0.359155	0.212766	0.241135	0.269504	0.042254	0.274648	0.471831	0.676056	0.957746	0.021127	0.197183	0.5	0.774648	0.985915	0.007042	0.253521	0.492958	0.760563	1	0.408451	0.309859	0.28169	0.148936	0.06383	0.007092	0.007042	0.211268	0.549296	0.704225	1	0.225352	0.471831	0.619718	0.830986	0.992958	0.06338	0.147887	0.28169	0.352113	0.922535	0.464789	0.411348	0.014085	0.253521	0.521127	0.795775	0.992958	0.323944
0.331019	0.354167	0.314815	0.213457	0.232019	0.218097	0.006944	0.226852	0.467593	0.770833	0.99537	0.00463	0.282407	0.50463	0.747685	0.997685	0.002315	0.231481	0.483796	0.722222	1	0.555556	0.24537	0.199074	0.083527	0.041763	0	0.002315	0.256944	0.49537	0.752315	1	0.016204	0.231481	0.400463	0.729167	0.988426	0.043981	0.266204	0.525463	0.696759	0.953704	0.444444	0.37587	0.011574	0.247685	0.497685	0.699074	0.988426	0.347222
0.379032	0.419355	0.201613	0.341463	0.170732	0.130081	0.032258	0.217742	0.395161	0.653226	1	0.016129	0.258065	0.556452	0.830645	0.983871	0.008065	0.16129	0.483871	0.66129	0.951613	0.572581	0.048387	0.379032	0.056911	0.04065	0.00813	0.008065	0.258065	0.669355	0.814516	1	0.66129	0.66129	0.879032	0.887097	0.951613	0.080645	0.16129	0.33871	0.435484	0.653226	0.346774	0.406504	0.104839	0.193548	0.459677	0.677419	0.951613	0.435484
0.432668	0.329177	0.238155	0.27965	0.217228	0.147316	0.003741	0.235661	0.485037	0.761845	0.998753	0.002494	0.274314	0.493766	0.729426	0.997506	0.001247	0.244389	0.514963	0.778055	1	0.451372	0.01995	0.528678	0.012484	0.077403	0	0.001247	0.253117	0.445137	0.605985	1	0.498753	0.502494	0.612219	0.765586	0.84414	0.016209	0.233167	0.637157	0.865337	0.997506	0.361596	0.401998	0.007481	0.279302	0.528678	0.784289	0.995012	0.342893
0.444149	0.295213	0.260638	0.232	0.218667	0.162667	0.005319	0.271277	0.505319	0.707447	1	0.023936	0.231383	0.478723	0.765957	0.99734	0.00266	0.199468	0.489362	0.800532	0.986702	0.513298	0.279255	0.207447	0.090667	0.058667	0.005333	0.00266	0.327128	0.515957	0.720745	1	0.029255	0.175532	0.300532	0.864362	0.984043	0.007979	0.412234	0.587766	0.773936	0.837766	0.430851	0.336	0.021277	0.207447	0.361702	0.81383	0.986702	0.332447
0.296053	0.388158	0.315789	0.205298	0.198675	0.258278	0.013158	0.289474	0.401316	0.690789	1	0.039474	0.236842	0.519737	0.717105	0.993421	0.006579	0.203947	0.539474	0.815789	0.980263	0.348684	0.322368	0.328947	0.13245	0.039735	0.013245	0.006579	0.138158	0.506579	0.743421	1	0.013158	0.243421	0.618421	0.881579	0.986842	0.164474	0.315789	0.401316	0.480263	0.815789	0.394737	0.490066	0.019737	0.203947	0.519737	0.736842	0.973684	0.407895
0.457944	0.271028	0.271028	0.264151	0.273585	0.150943	0.018692	0.242991	0.46729	0.738318	1	0.065421	0.271028	0.523364	0.747664	0.990654	0.009346	0.224299	0.383178	0.64486	0.971963	0.457944	0.542056	0	0.207547	0	0	0.009346	0.271028	0.495327	0.728972	1	0.037383	0.233645	0.420561	0.766355	0.971963	0	0	0	0	0	0.439252	0.339623	0.037383	0.233645	0.514019	0.654206	0.971963	0.28972
0.356932	0.345133	0.297935	0.249631	0.208272	0.217134	0.004425	0.231563	0.49115	0.772861	0.998525	0.00885	0.264012	0.520649	0.735988	0.99705	0.001475	0.240413	0.476401	0.738938	1	0.449853	0.253687	0.29646	0.090103	0.063516	0.001477	0.001475	0.213864	0.433628	0.727139	1	0.032448	0.160767	0.421829	0.848083	0.958702	0.00885	0.399705	0.59292	0.747788	0.902655	0.533923	0.363368	0.00295	0.265487	0.498525	0.734513	0.958702	0.386431
0.367704	0.340467	0.291829	0.231969	0.208577	0.208577	0.007782	0.252918	0.501946	0.774319	0.992218	0.005837	0.214008	0.470817	0.710117	0.998054	0.001946	0.270428	0.519455	0.7393	1	0.439689	0.16537	0.394942	0.05653	0.076023	0.005848	0.001946	0.138132	0.375486	0.727626	1	0.040856	0.445525	0.634241	0.787938	0.957198	0.005837	0.299611	0.540856	0.756809	0.990272	0.550584	0.335283	0.005837	0.309339	0.509728	0.752918	0.996109	0.344358
0.351946	0.368866	0.279188	0.262712	0.205085	0.20678	0.003384	0.169205	0.423012	0.690355	0.998308	0.006768	0.307953	0.558376	0.778342	1	0.001692	0.277496	0.507614	0.771574	0.98308	0.516074	0.245347	0.238579	0.09661	0.049153	0.005085	0.001692	0.260575	0.519459	0.763113	1	0.093063	0.279188	0.467005	0.780034	0.984772	0.01692	0.179357	0.582064	0.725888	0.947547	0.509306	0.359322	0.015228	0.331641	0.546531	0.783418	0.986464	0.387479
0.278245	0.489183	0.232572	0.243536	0.129886	0.230307	0.002404	0.246394	0.461538	0.798077	1	0.001202	0.278846	0.527043	0.740986	0.996394	0.000601	0.218149	0.451322	0.701322	0.998798	0.798077	0.061899	0.140024	0.036681	0.039086	0.003007	0.000601	0.289062	0.507212	0.715745	1	0.03125	0.220553	0.719952	0.859375	0.971154	0.001803	0.092548	0.28726	0.846154	0.998798	0.291466	0.340349	0.007212	0.167067	0.413462	0.751803	0.998798	0.521034
0.491018	0.293413	0.215569	0.301205	0.186747	0.144578	0.011976	0.323353	0.616766	0.820359	1	0.053892	0.185629	0.437126	0.652695	0.994012	0.005988	0.143713	0.329341	0.526946	0.928144	0.45509	0.185629	0.359281	0.072289	0.084337	0	0.005988	0.353293	0.532934	0.694611	1	0.143713	0.293413	0.341317	0.473054	0.682635	0.017964	0.215569	0.736527	0.826347	0.976048	0.281437	0.313253	0.023952	0.155689	0.323353	0.491018	0.928144	0.281437
0.403642	0.29742	0.298938	0.237082	0.212766	0.18541	0.004552	0.2261	0.482549	0.737481	0.990895	0.003035	0.233687	0.508346	0.778452	0.998483	0.001517	0.291351	0.505311	0.740516	1	0.509863	0.171472	0.318665	0.072948	0.06079	0	0.001517	0.224583	0.465857	0.770865	1	0.013657	0.233687	0.405159	0.585736	0.907436	0.047041	0.294385	0.599393	0.889226	0.992413	0.491654	0.325228	0.01214	0.280728	0.566009	0.799697	0.996965	0.306525
0.456522	0.333333	0.210145	0.335766	0.138686	0.189781	0.021739	0.210145	0.442029	0.746377	1	0.014493	0.202899	0.42029	0.644928	0.992754	0.007246	0.369565	0.57971	0.797101	0.971014	0.5	0.318841	0.181159	0.080292	0.080292	0.007299	0.007246	0.253623	0.42029	0.76087	1	0.369565	0.5	0.615942	0.818841	0.956522	0.021739	0.094203	0.137681	0.246377	0.978261	0.326087	0.452555	0.108696	0.268116	0.550725	0.746377	0.971014	0.384058
0.418367	0.340136	0.241497	0.279863	0.221843	0.177474	0.013605	0.248299	0.527211	0.772109	1	0.006803	0.261905	0.486395	0.714286	0.982993	0.003401	0.207483	0.455782	0.738095	0.962585	0.612245	0.20068	0.187075	0.081911	0.054608	0.006826	0.003401	0.261905	0.496599	0.663265	1	0.020408	0.285714	0.639456	0.812925	0.931973	0.013605	0.183673	0.336735	0.843537	0.986395	0.346939	0.327645	0.027211	0.241497	0.557823	0.758503	0.962585	0.380952
0.4	0.241379	0.358621	0.180556	0.277778	0.180556	0.027586	0.282759	0.517241	0.717241	0.972414	0.013793	0.158621	0.503448	0.765517	0.951724	0.006897	0.193103	0.434483	0.737931	1	0.365517	0.310345	0.324138	0.111111	0.083333	0.013889	0.006897	0.227586	0.448276	0.710345	1	0.02069	0.268966	0.489655	0.675862	0.993103	0.048276	0.117241	0.524138	0.793103	0.917241	0.503448	0.472222	0.02069	0.241379	0.475862	0.731034	0.97931	0.262069
0.310087	0.315068	0.374844	0.190773	0.269327	0.24813	0.002491	0.234122	0.486924	0.740971	1	0.004981	0.265255	0.499377	0.752179	0.996264	0.001245	0.250311	0.496887	0.742217	0.998755	0.466999	0.242839	0.290162	0.100998	0.05611	0.003741	0.001245	0.231631	0.460772	0.737235	1	0.038605	0.200498	0.420922	0.803238	0.998755	0.006227	0.32005	0.542964	0.703611	0.992528	0.570361	0.408978	0.003736	0.255293	0.473225	0.726027	0.998755	0.303861
0.352798	0.374696	0.272506	0.270732	0.178049	0.214634	0.004866	0.257908	0.547445	0.83455	0.995134	0.014599	0.294404	0.498783	0.737226	1	0.002433	0.192214	0.437956	0.6618	0.973236	0.635036	0.07056	0.294404	0.029268	0.063415	0.004878	0.002433	0.425791	0.625304	0.798054	1	0.099757	0.114355	0.277372	0.294404	0.990268	0.014599	0.150852	0.233577	0.447689	0.924574	0.479319	0.404878	0.014599	0.194647	0.379562	0.717762	0.992701	0.423358
0.37247	0.303644	0.323887	0.22027	0.240541	0.214865	0.004049	0.288799	0.54386	0.784076	1	0.005398	0.194332	0.450742	0.721997	0.995951	0.00135	0.245614	0.48583	0.735493	0.99865	0.411606	0.167341	0.421053	0.07973	0.078378	0.002703	0.00135	0.306343	0.489879	0.804318	0.99865	0.004049	0.17004	0.34278	0.900135	1	0.025641	0.268556	0.541161	0.678812	0.932524	0.51552	0.378378	0.005398	0.249663	0.466937	0.680162	0.99865	0.300945
0.40625	0.395833	0.197917	0.315789	0.2	0.126316	0.052083	0.21875	0.447917	0.729167	1	0.020833	0.197917	0.489583	0.6875	0.947917	0.010417	0.322917	0.5	0.791667	0.958333	0.583333	0.3125	0.104167	0.094737	0.052632	0.010526	0.010417	0.145833	0.333333	0.520833	1	0.40625	0.65625	0.760417	0.854167	0.979167	0.28125	0.291667	0.572917	0.59375	0.947917	0.427083	0.4	0.114583	0.354167	0.541667	0.75	0.958333	0.4375
0.362218	0.402946	0.234835	0.296618	0.155247	0.187337	0.0026	0.282496	0.577123	0.790295	1	0.001733	0.22357	0.511265	0.761698	0.999133	0.000867	0.237435	0.422877	0.630849	0.966205	0.506066	0.116118	0.377816	0.049436	0.085863	0.004337	0.000867	0.185442	0.52513	0.793761	1	0.016464	0.292894	0.409879	0.681976	0.886482	0.003466	0.281629	0.541594	0.70104	0.988735	0.444541	0.348656	0.003466	0.218371	0.414211	0.665511	0.966205	0.443674
0.432432	0.261261	0.306306	0.245455	0.263636	0.145455	0.018018	0.279279	0.468468	0.747748	0.990991	0.045045	0.189189	0.567568	0.792793	1	0.009009	0.234234	0.387387	0.657658	0.954955	0.396396	0.513514	0.09009	0.163636	0.018182	0	0.009009	0.198198	0.468468	0.684685	1	0.036036	0.225225	0.387387	0.630631	0.855856	0.891892	0.900901	0.927928	0.945946	0.972973	0.441441	0.327273	0.036036	0.243243	0.495495	0.630631	0.954955	0.288288
0.31411	0.364417	0.321472	0.210074	0.246929	0.230958	0.002454	0.280982	0.531288	0.757055	0.998773	0.004908	0.235583	0.480982	0.746012	1	0.001227	0.238037	0.493252	0.748466	0.997546	0.46135	0.245399	0.293252	0.095823	0.061425	0.004914	0.001227	0.207362	0.457669	0.728834	1	0.039264	0.257669	0.422086	0.809816	0.997546	0.006135	0.320245	0.573006	0.732515	0.991411	0.561963	0.415233	0.003681	0.257669	0.469939	0.739877	0.997546	0.402454
0.386567	0.337313	0.276119	0.237668	0.192825	0.170404	0.01791	0.241791	0.574627	0.810448	0.998507	0.002985	0.185075	0.425373	0.716418	1	0.001493	0.316418	0.492537	0.679104	0.997015	0.502985	0.114925	0.38209	0.049327	0.085202	0.004484	0.001493	0.176119	0.532836	0.773134	1	0.031343	0.302985	0.459701	0.6	0.995522	0.002985	0.274627	0.501493	0.777612	0.956716	0.456716	0.337818	0.004478	0.255224	0.428358	0.68209	0.958209	0.383582
0.398827	0.313783	0.28739	0.255882	0.235294	0.197059	0.017595	0.272727	0.504399	0.83871	1	0.005865	0.28739	0.560117	0.747801	0.970674	0.002933	0.178886	0.428152	0.648094	0.941349	0.390029	0.202346	0.407625	0.064706	0.052941	0.011765	0.002933	0.222874	0.636364	0.900293	1	0.02346	0.105572	0.240469	0.656891	0.806452	0.143695	0.331378	0.44868	0.71261	0.868035	0.439883	0.452941	0.008798	0.211144	0.472141	0.674487	0.970674	0.343109
0.389937	0.339623	0.27044	0.303797	0.170886	0.164557	0.037736	0.257862	0.591195	0.767296	1	0.018868	0.27044	0.477987	0.679245	0.981132	0.006289	0.144654	0.433962	0.660377	0.987421	0.257862	0.314465	0.427673	0.050633	0.050633	0.012658	0.006289	0.251572	0.572327	0.918239	1	0.018868	0.446541	0.528302	0.616352	0.930818	0.08805	0.213836	0.352201	0.773585	0.880503	0.36478	0.392405	0.018868	0.18239	0.358491	0.540881	0.937107	0.358491
0.310734	0.449153	0.240113	0.246459	0.144476	0.229462	0.011299	0.288136	0.545198	0.740113	0.99435	0.00565	0.180791	0.432203	0.757062	0.988701	0.002825	0.327684	0.522599	0.725989	1	0.615819	0.186441	0.19774	0.073654	0.045326	0	0.002825	0.158192	0.381356	0.793785	1	0.149718	0.426554	0.536723	0.677966	0.813559	0.262712	0.403955	0.632768	0.757062	0.963277	0.548023	0.322946	0.008475	0.206215	0.488701	0.748588	0.997175	0.440678
0.341071	0.371429	0.2875	0.232558	0.19678	0.216458	0.005357	0.223214	0.480357	0.764286	0.998214	0.003571	0.226786	0.4625	0.723214	1	0.001786	0.317857	0.560714	0.751786	0.996429	0.5	0.123214	0.376786	0.064401	0.08229	0.003578	0.001786	0.175	0.510714	0.798214	1	0.057143	0.35	0.605357	0.751786	0.976786	0.119643	0.226786	0.478571	0.691071	0.989286	0.580357	0.336315	0.007143	0.342857	0.555357	0.751786	0.996429	0.408929
0.329208	0.361386	0.309406	0.2134	0.188586	0.26799	0.00495	0.264851	0.490099	0.777228	0.997525	0.007426	0.215347	0.509901	0.727723	0.987624	0.002475	0.25	0.487624	0.720297	1	0.371287	0.084158	0.544554	0.034739	0.114144	0.004963	0.002475	0.222772	0.425743	0.735149	1	0.05198	0.108911	0.195545	0.287129	0.35396	0.014851	0.393564	0.574257	0.772277	0.985149	0.534653	0.436725	0.009901	0.247525	0.435644	0.685644	0.980198	0.376238
0.359223	0.325243	0.315534	0.190244	0.253659	0.209756	0.009709	0.218447	0.456311	0.786408	1	0.014563	0.247573	0.524272	0.76699	0.970874	0.004854	0.271845	0.475728	0.674757	0.956311	0.417476	0.398058	0.184466	0.117073	0.068293	0.009756	0.004854	0.378641	0.650485	0.81068	1	0.009709	0.174757	0.402913	0.572816	0.849515	0.072816	0.208738	0.533981	0.883495	0.956311	0.378641	0.409756	0.014563	0.213592	0.427184	0.621359	0.956311	0.320388
0.330645	0.4	0.269355	0.253635	0.15832	0.208401	0.022581	0.3	0.530645	0.820968	1	0.003226	0.204839	0.45	0.695161	0.985484	0.001613	0.282258	0.529032	0.724194	0.974194	0.540323	0.140323	0.319355	0.050081	0.072698	0.004847	0.001613	0.143548	0.408065	0.759677	1	0.174194	0.403226	0.614516	0.727419	0.848387	0.006452	0.340323	0.551613	0.746774	0.977419	0.503226	0.310178	0.006452	0.287097	0.491935	0.696774	0.974194	0.440323
0.385542	0.373494	0.240964	0.333333	0.218182	0.163636	0.012048	0.216867	0.475904	0.728916	1	0.018072	0.295181	0.554217	0.837349	0.993976	0.006024	0.210843	0.439759	0.596386	0.957831	0.36747	0.307229	0.325301	0.09697	0.060606	0	0.006024	0.174699	0.445783	0.801205	1	0.036145	0.271084	0.391566	0.487952	0.927711	0.060241	0.596386	0.698795	0.777108	0.885542	0.379518	0.387879	0.03012	0.23494	0.415663	0.614458	0.957831	0.39759
0.333333	0.350877	0.315789	0.228873	0.257042	0.211268	0.010526	0.242105	0.487719	0.789474	0.996491	0.007018	0.2	0.505263	0.698246	1	0.003509	0.273684	0.491228	0.729825	0.989474	0.385965	0.17193	0.442105	0.049296	0.091549	0	0.003509	0.217544	0.452632	0.701754	1	0.150877	0.308772	0.438596	0.642105	0.733333	0.007018	0.252632	0.526316	0.82807	0.992982	0.526316	0.380282	0.014035	0.245614	0.487719	0.680702	0.989474	0.364912
0.52809	0.191011	0.280899	0.159091	0.284091	0.159091	0.033708	0.247191	0.516854	0.764045	1	0.022472	0.168539	0.337079	0.573034	0.876404	0.011236	0.325843	0.494382	0.752809	0.977528	0.247191	0	0.752809	0	0.090909	0	0.011236	0.191011	0.258427	0.550562	1	0	0	0	0	0	0.05618	0.314607	0.505618	0.752809	0.955056	0.393258	0.431818	0.089888	0.314607	0.483146	0.707865	0.977528	0.157303
0.360444	0.391867	0.247689	0.261111	0.164815	0.216667	0.018484	0.232902	0.513863	0.735675	0.998152	0.003697	0.292052	0.504621	0.772643	0.994455	0.001848	0.195933	0.438078	0.720887	1	0.735675	0.110906	0.15342	0.064815	0.05	0.001852	0.001848	0.266174	0.48244	0.744917	1	0.005545	0.19963	0.608133	0.669131	0.863216	0.018484	0.12939	0.550832	0.946396	0.990758	0.380776	0.396296	0.007394	0.25878	0.55268	0.783734	0.992606	0.414048
0.236667	0.413333	0.35	0.200669	0.200669	0.277592	0.02	0.22	0.396667	0.76	0.996667	0.006667	0.243333	0.566667	0.763333	1	0.003333	0.256667	0.496667	0.686667	0.993333	0.613333	0.146667	0.24	0.053512	0.060201	0	0.003333	0.336667	0.646667	0.813333	1	0.023333	0.083333	0.133333	0.356667	0.993333	0.203333	0.31	0.496667	0.556667	0.93	0.51	0.421405	0.013333	0.21	0.436667	0.663333	0.993333	0.42
0.357143	0.330357	0.3125	0.2287	0.215247	0.201794	0.026786	0.245536	0.477679	0.732143	1	0.022321	0.263393	0.446429	0.75	0.986607	0.004464	0.183036	0.535714	0.736607	0.991071	0.522321	0.151786	0.325893	0.089686	0.06278	0	0.004464	0.272321	0.410714	0.696429	1	0.013393	0.066964	0.5625	0.71875	0.919643	0.09375	0.196429	0.540179	0.794643	0.986607	0.513393	0.376682	0.017857	0.330357	0.513393	0.78125	0.991071	0.357143
0.353659	0.292683	0.353659	0.197531	0.246914	0.222222	0.060976	0.256098	0.414634	0.621951	0.95122	0.02439	0.158537	0.634146	0.841463	0.97561	0.012195	0.195122	0.439024	0.682927	1	0.378049	0.292683	0.329268	0.098765	0.074074	0	0.012195	0.121951	0.54878	0.829268	1	0.036585	0.280488	0.597561	0.731707	0.804878	0.134146	0.195122	0.426829	0.512195	0.939024	0.426829	0.493827	0.036585	0.170732	0.463415	0.646341	0.963415	0.292683
0.332606	0.367503	0.299891	0.232533	0.20524	0.221616	0.004362	0.258451	0.507088	0.732824	1	0.002181	0.232279	0.529989	0.770992	0.997819	0.001091	0.245365	0.466739	0.726281	0.998909	0.417666	0.185387	0.396947	0.092795	0.076419	0.008734	0.001091	0.266085	0.544166	0.804798	0.996728	0.029444	0.220284	0.693566	0.865867	1	0.005453	0.25627	0.473282	0.603053	0.961832	0.502726	0.388646	0.005453	0.25627	0.454744	0.733915	0.996728	0.410033
0.369309	0.323777	0.306914	0.214527	0.222973	0.190878	0.003373	0.165261	0.514334	0.777403	1	0.016863	0.252951	0.448567	0.733558	0.998314	0.001686	0.29511	0.49747	0.708263	0.989882	0.522766	0.150084	0.32715	0.052365	0.072635	0.005068	0.001686	0.129848	0.403035	0.76054	1	0.163575	0.413153	0.598651	0.718381	0.848229	0.145025	0.340641	0.509275	0.743676	0.920742	0.480607	0.320946	0.015177	0.303541	0.485666	0.706577	0.919056	0.367622
0.395973	0.298658	0.305369	0.259259	0.245791	0.20202	0.006711	0.181208	0.446309	0.731544	0.996644	0.010067	0.248322	0.47651	0.687919	1	0.003356	0.312081	0.573826	0.781879	0.983221	0.399329	0.171141	0.42953	0.06734	0.080808	0.006734	0.003356	0.258389	0.550336	0.744966	1	0.224832	0.392617	0.486577	0.671141	0.825503	0.040268	0.167785	0.372483	0.791946	0.973154	0.520134	0.363636	0.077181	0.291946	0.510067	0.724832	0.969799	0.318792
0.359929	0.41844	0.221631	0.309059	0.152753	0.179396	0.005319	0.274823	0.489362	0.696809	0.996454	0.003546	0.265957	0.512411	0.72695	1	0.001773	0.189716	0.446809	0.810284	0.992908	0.638298	0.171986	0.189716	0.065719	0.044405	0.005329	0.001773	0.317376	0.491135	0.656028	1	0.019504	0.147163	0.324468	0.812057	0.994681	0.04078	0.191489	0.693262	0.886525	0.978723	0.379433	0.294849	0.01773	0.230496	0.402482	0.803191	0.994681	0.409574
0.400947	0.318863	0.280189	0.237757	0.21485	0.195103	0.003946	0.201263	0.434886	0.710339	1	0.001579	0.273875	0.513812	0.737964	0.995264	0.000789	0.325967	0.575375	0.796369	0.993686	0.416732	0.1397	0.443567	0.047393	0.082148	0.00158	0.000789	0.265193	0.51618	0.766377	1	0.32281	0.468035	0.604578	0.895817	0.993686	0.003157	0.187845	0.410418	0.722968	0.973954	0.453039	0.322275	0.003157	0.384373	0.588792	0.793212	0.993686	0.343331
0.31069	0.486637	0.202673	0.270903	0.136009	0.16165	0.002227	0.202673	0.435412	0.667038	1	0.003341	0.357461	0.64922	0.835189	0.998886	0.001114	0.167038	0.309577	0.514477	0.994432	0.683742	0.08686	0.229399	0.037904	0.037904	0.00223	0.001114	0.387528	0.636971	0.827394	1	0.005568	0.115813	0.188196	0.492205	0.875278	0.02784	0.150334	0.280624	0.430958	0.654788	0.518931	0.309922	0.004454	0.262806	0.514477	0.761693	0.998886	0.466592
0.323136	0.445507	0.231358	0.260536	0.130268	0.204981	0.003824	0.248566	0.487572	0.711281	0.994264	0.005736	0.229446	0.51434	0.741874	1	0.001912	0.273423	0.470363	0.780115	0.99044	0.695985	0.049713	0.254302	0.032567	0.051724	0.001916	0.001912	0.239006	0.516252	0.699809	1	0.049713	0.210325	0.443595	0.537285	0.837476	0.133843	0.328872	0.424474	0.921606	0.994264	0.386233	0.383142	0.00956	0.273423	0.539197	0.776291	0.99044	0.435946
0.376721	0.352941	0.270338	0.243108	0.174185	0.197995	0.005006	0.176471	0.434293	0.71214	1	0.010013	0.28035	0.555695	0.773467	0.996245	0.001252	0.345432	0.530663	0.743429	0.998748	0.515645	0.117647	0.366708	0.04386	0.068922	0.006266	0.001252	0.188986	0.379224	0.692115	1	0.005006	0.390488	0.555695	0.710889	0.997497	0.015019	0.366708	0.624531	0.841051	0.992491	0.428035	0.333333	0.003755	0.360451	0.543179	0.763454	0.997497	0.387985
0.331865	0.389134	0.279001	0.286765	0.170588	0.227941	0.002937	0.239354	0.516887	0.779736	1	0.005874	0.23348	0.496329	0.741557	0.995595	0.001468	0.28047	0.48605	0.718062	0.998532	0.421439	0.161527	0.417034	0.091176	0.073529	0.002941	0.001468	0.240822	0.509545	0.820852	1	0.0279	0.229075	0.402349	0.888399	0.997063	0.008811	0.277533	0.527166	0.671072	0.92511	0.528634	0.367647	0.017621	0.264317	0.461087	0.690162	0.998532	0.409692
0.391304	0.452899	0.155797	0.345455	0.138182	0.112727	0.014493	0.300725	0.532609	0.771739	1	0.025362	0.228261	0.518116	0.710145	0.996377	0.003623	0.130435	0.333333	0.706522	0.923913	0.717391	0.050725	0.231884	0.021818	0.058182	0	0.003623	0.246377	0.48913	0.666667	1	0.032609	0.039855	0.108696	0.315217	0.32971	0.130435	0.365942	0.728261	0.844203	0.92029	0.23913	0.370909	0.01087	0.221014	0.525362	0.778986	0.985507	0.463768
0.385768	0.35206	0.262172	0.263158	0.210526	0.229323	0.007491	0.220974	0.434457	0.737828	0.996255	0.011236	0.333333	0.610487	0.812734	1	0.003745	0.179775	0.40824	0.64794	0.985019	0.303371	0.265918	0.430712	0.075188	0.067669	0.007519	0.003745	0.134831	0.531835	0.76779	1	0.044944	0.138577	0.28839	0.794007	0.985019	0.161049	0.385768	0.509363	0.726592	0.93633	0.464419	0.473684	0.022472	0.2397	0.505618	0.722846	0.985019	0.430712
0.284404	0.449541	0.266055	0.271889	0.175115	0.235023	0.013761	0.243119	0.53211	0.738532	1	0.009174	0.215596	0.5	0.798165	0.986239	0.004587	0.233945	0.477064	0.674312	0.894495	0.440367	0.408257	0.151376	0.110599	0.036866	0	0.004587	0.266055	0.545872	0.779817	1	0.018349	0.302752	0.472477	0.623853	0.857798	0.082569	0.114679	0.247706	0.908257	0.949541	0.412844	0.442396	0.022936	0.243119	0.440367	0.655963	0.922018	0.454128
0.28551	0.392577	0.321913	0.234286	0.175714	0.248571	0.001428	0.290507	0.508922	0.758744	0.996431	0.002855	0.231263	0.473947	0.73733	0.999286	0.000714	0.243398	0.517488	0.750178	1	0.539615	0.373305	0.087081	0.117143	0.027143	0.004286	0.000714	0.24768	0.484654	0.721627	1	0.002141	0.227695	0.492505	0.744468	0.93576	0.033547	0.321199	0.660956	0.958601	0.995004	0.610992	0.29	0.002141	0.255532	0.523911	0.753747	0.998572	0.427552
0.334582	0.360799	0.304619	0.25	0.21125	0.215	0.011236	0.245943	0.51186	0.757803	1	0.002497	0.260924	0.515605	0.755306	0.996255	0.001248	0.2397	0.469413	0.701623	0.998752	0.43196	0.174782	0.393258	0.0925	0.0775	0.0025	0.001248	0.278402	0.526841	0.787765	1	0.021223	0.194757	0.423221	0.875156	0.998752	0.041199	0.269663	0.500624	0.635456	0.957553	0.516854	0.4025	0.004994	0.25593	0.456929	0.681648	0.996255	0.39201
0.307087	0.401575	0.291339	0.27668	0.15415	0.245059	0.043307	0.220472	0.519685	0.755906	1	0.007874	0.275591	0.507874	0.771654	0.988189	0.003937	0.23622	0.472441	0.669291	0.992126	0.326772	0.102362	0.570866	0.039526	0.102767	0	0.003937	0.188976	0.448819	0.767717	1	0.011811	0.031496	0.80315	0.858268	0.893701	0.070866	0.295276	0.492126	0.649606	0.988189	0.503937	0.339921	0.011811	0.259843	0.437008	0.649606	0.992126	0.409449
0.355183	0.314024	0.330793	0.210687	0.232061	0.218321	0.003049	0.272866	0.551829	0.78811	0.989329	0.006098	0.190549	0.419207	0.696646	1	0.001524	0.282012	0.493902	0.731707	0.998476	0.403963	0.16311	0.432927	0.071756	0.077863	0.00458	0.001524	0.304878	0.510671	0.821646	1	0.004573	0.179878	0.394817	0.868902	0.998476	0.028963	0.26372	0.530488	0.676829	0.92378	0.544207	0.381679	0.006098	0.245427	0.449695	0.690549	0.998476	0.306402
0.388158	0.282895	0.328947	0.208791	0.261538	0.18022	0.004386	0.256579	0.508772	0.780702	0.997807	0.017544	0.22807	0.482456	0.717105	1	0.002193	0.258772	0.486842	0.734649	0.995614	0.385965	0.184211	0.429825	0.076923	0.09011	0.002198	0.002193	0.298246	0.513158	0.758772	1	0.100877	0.254386	0.526316	0.774123	0.949561	0.006579	0.199561	0.440789	0.701754	0.989035	0.541667	0.408791	0.006579	0.267544	0.482456	0.717105	0.995614	0.285088
0.398637	0.311755	0.289608	0.204778	0.238908	0.18942	0.015332	0.238501	0.495741	0.729131	0.998296	0.003407	0.221465	0.451448	0.778535	1	0.001704	0.270869	0.526405	0.737649	0.994889	0.374787	0.076661	0.548552	0.02901	0.087031	0.011945	0.001704	0.287905	0.551959	0.877342	1	0.006814	0.109029	0.439523	0.822828	0.993186	0.015332	0.241908	0.487223	0.67632	0.979557	0.44293	0.372014	0.006814	0.255537	0.511073	0.722317	0.994889	0.342419
0.38843	0.278237	0.333333	0.205517	0.314483	0.197241	0.008264	0.275482	0.548209	0.760331	1	0.004132	0.206612	0.431129	0.703857	0.99449	0.001377	0.249311	0.506887	0.758953	0.995868	0.465565	0.232782	0.301653	0.096552	0.057931	0.002759	0.001377	0.212121	0.440771	0.712121	1	0.0427	0.18595	0.42562	0.819559	0.975207	0.006887	0.348485	0.57438	0.736915	0.995868	0.578512	0.383448	0.004132	0.253444	0.49449	0.753444	0.995868	0.294766
0.312253	0.371542	0.316206	0.230159	0.178571	0.246032	0.011858	0.185771	0.391304	0.774704	1	0.007905	0.332016	0.541502	0.72332	0.996047	0.003953	0.252964	0.490119	0.719368	0.992095	0.387352	0.01581	0.596838	0.003968	0.138889	0.011905	0.003953	0.328063	0.537549	0.648221	1	0.422925	0.422925	0.426877	0.494071	0.498024	0.01581	0.177866	0.44664	0.778656	0.992095	0.545455	0.388889	0.023715	0.26087	0.505929	0.699605	0.976285	0.403162
0.369085	0.456362	0.174553	0.294737	0.115789	0.146316	0.008412	0.233438	0.542587	0.771819	0.995794	0.002103	0.293375	0.481598	0.769716	1	0.001052	0.221872	0.409043	0.663512	0.994742	0.679285	0.068349	0.252366	0.041053	0.045263	0.009474	0.001052	0.277603	0.543638	0.796004	1	0.037855	0.241851	0.42061	0.602524	0.968454	0.019979	0.218717	0.480547	0.701367	0.993691	0.300736	0.263158	0.009464	0.160883	0.377497	0.528917	0.994742	0.462671
0.4	0.285714	0.314286	0.259615	0.221154	0.173077	0.028571	0.32381	0.552381	0.771429	0.990476	0.019048	0.266667	0.428571	0.752381	1	0.009524	0.180952	0.409524	0.695238	0.933333	0.361905	0.390476	0.247619	0.086538	0.009615	0.009615	0.009524	0.27619	0.466667	0.609524	1	0.038095	0.171429	0.266667	0.409524	0.704762	0.714286	0.761905	0.828571	0.885714	0.952381	0.390476	0.538462	0.057143	0.2	0.466667	0.72381	0.933333	0.257143
0.397436	0.337607	0.264957	0.23176	0.227468	0.188841	0.008547	0.188034	0.397436	0.688034	1	0.025641	0.264957	0.504274	0.730769	0.974359	0.004274	0.350427	0.559829	0.777778	0.995726	0.495726	0.179487	0.324786	0.072961	0.081545	0.012876	0.004274	0.136752	0.273504	0.623932	1	0.247863	0.41453	0.478632	0.666667	0.747863	0.111111	0.512821	0.769231	0.884615	0.995726	0.440171	0.377682	0.017094	0.435897	0.645299	0.777778	0.991453	0.337607
0.394928	0.235507	0.369565	0.152727	0.32	0.167273	0.007246	0.231884	0.471014	0.768116	0.996377	0.01087	0.224638	0.543478	0.67029	0.963768	0.003623	0.26087	0.503623	0.742754	1	0.394928	0.188406	0.416667	0.050909	0.094545	0.007273	0.003623	0.163043	0.40942	0.666667	1	0.134058	0.300725	0.387681	0.612319	0.706522	0.036232	0.264493	0.539855	0.84058	0.992754	0.550725	0.421818	0.021739	0.23913	0.481884	0.684783	0.98913	0.271739
0.364692	0.29036	0.344948	0.206977	0.265116	0.206977	0.003484	0.229965	0.516841	0.761905	0.998839	0.009292	0.2741	0.505226	0.747967	0.996516	0.001161	0.24158	0.490128	0.739837	1	0.377468	0.038328	0.584204	0.019767	0.084884	0.005814	0.001161	0.28223	0.458769	0.684088	1	0.278746	0.384437	0.653891	0.832753	0.911731	0.036005	0.210221	0.511034	0.772358	0.996516	0.545877	0.355814	0.026713	0.296167	0.508711	0.757259	0.996516	0.305459
0.410156	0.320312	0.269531	0.25098	0.239216	0.188235	0.023438	0.265625	0.535156	0.722656	1	0.007812	0.183594	0.453125	0.691406	0.996094	0.003906	0.230469	0.523438	0.792969	0.980469	0.5625	0.28125	0.15625	0.109804	0.054902	0	0.003906	0.277344	0.523438	0.664062	1	0.027344	0.191406	0.464844	0.8125	0.980469	0.054688	0.261719	0.433594	0.886719	0.925781	0.335938	0.345098	0.015625	0.328125	0.539062	0.789062	0.980469	0.386719
0.354571	0.385042	0.260388	0.266667	0.188889	0.208333	0.00831	0.299169	0.493075	0.736842	0.980609	0.00554	0.213296	0.501385	0.783934	1	0.00277	0.279778	0.495845	0.706371	0.98338	0.542936	0.290859	0.166205	0.088889	0.044444	0.005556	0.00277	0.177285	0.576177	0.792244	1	0.116343	0.238227	0.457064	0.747922	0.927978	0.310249	0.362881	0.493075	0.598338	0.980609	0.531856	0.311111	0.01108	0.240997	0.531856	0.745152	0.98892	0.398892
0.284615	0.369231	0.346154	0.209302	0.232558	0.255814	0.038462	0.276923	0.476923	0.715385	1	0.015385	0.238462	0.538462	0.792308	0.992308	0.007692	0.215385	0.461538	0.661538	0.969231	0.569231	0.369231	0.061538	0.131783	0.054264	0.007752	0.007692	0.361538	0.676923	0.838462	1	0.023077	0.138462	0.338462	0.6	0.807692	0.284615	0.292308	0.315385	0.430769	0.946154	0.423077	0.449612	0.023077	0.2	0.446154	0.676923	0.969231	0.361538
0.519048	0.309524	0.171429	0.358852	0.196172	0.105263	0.014286	0.338095	0.604762	0.8	0.995238	0.009524	0.22381	0.404762	0.62381	1	0.004762	0.157143	0.357143	0.595238	0.980952	0.690476	0.142857	0.166667	0.047847	0.028708	0.009569	0.004762	0.480952	0.652381	0.82381	1	0.028571	0.057143	0.247619	0.309524	0.452381	0.090476	0.12381	0.166667	0.37619	0.433333	0.238095	0.191388	0.033333	0.119048	0.252381	0.357143	0.447619	0.328571
0.331818	0.336364	0.331818	0.210046	0.246575	0.223744	0.013636	0.231818	0.490909	0.781818	0.995455	0.018182	0.286364	0.454545	0.663636	1	0.004545	0.204545	0.586364	0.759091	0.990909	0.536364	0.145455	0.318182	0.091324	0.073059	0	0.004545	0.277273	0.422727	0.659091	1	0.018182	0.118182	0.618182	0.759091	0.936364	0.05	0.240909	0.586364	0.804545	0.990909	0.513636	0.401826	0.009091	0.309091	0.545455	0.759091	0.990909	0.359091
0.45092	0.392638	0.156442	0.378462	0.12	0.098462	0.006135	0.315951	0.527607	0.760736	0.993865	0.009202	0.340491	0.625767	0.834356	1	0.003067	0.113497	0.199387	0.312883	0.745399	0.671779	0.101227	0.226994	0.067692	0.092308	0	0.003067	0.346626	0.558282	0.757669	1	0.052147	0.122699	0.233129	0.325153	0.518405	0.01227	0.171779	0.47546	0.806748	0.98773	0.220859	0.276923	0.009202	0.156442	0.257669	0.441718	0.97546	0.380368
0.385332	0.351572	0.263097	0.278555	0.184149	0.17366	0.002328	0.207218	0.500582	0.771828	1	0.006985	0.252619	0.450524	0.738068	0.998836	0.001164	0.268917	0.545984	0.736903	0.969732	0.463329	0.123399	0.413271	0.04662	0.09324	0.006993	0.001164	0.19674	0.398137	0.740396	1	0.020955	0.273574	0.533178	0.662398	0.804424	0.058207	0.296857	0.555297	0.813737	0.976717	0.43539	0.324009	0.020955	0.351572	0.525029	0.715949	0.969732	0.380675
0.262664	0.476548	0.260788	0.214286	0.148496	0.236842	0.030019	0.249531	0.439024	0.727955	1	0.007505	0.26454	0.534709	0.78424	0.998124	0.001876	0.213884	0.500938	0.724203	0.994371	0.686679	0.166979	0.146341	0.067669	0.037594	0.003759	0.001876	0.275797	0.553471	0.804878	1	0.015009	0.238274	0.377111	0.690432	0.981238	0.016886	0.195122	0.341463	0.716698	0.834897	0.484053	0.368421	0.009381	0.358349	0.641651	0.827392	0.994371	0.45591
0.336842	0.336842	0.326316	0.21164	0.259259	0.26455	0.021053	0.242105	0.478947	0.736842	1	0.010526	0.184211	0.431579	0.731579	0.984211	0.005263	0.321053	0.542105	0.757895	0.973684	0.405263	0.473684	0.121053	0.164021	0.037037	0.005291	0.005263	0.284211	0.589474	0.815789	1	0.010526	0.336842	0.531579	0.705263	0.978947	0.078947	0.1	0.242105	0.289474	0.736842	0.468421	0.507937	0.015789	0.257895	0.478947	0.726316	0.984211	0.342105
0.312977	0.354962	0.332061	0.210728	0.203065	0.279693	0.007634	0.160305	0.370229	0.732824	0.992366	0.015267	0.312977	0.530534	0.782443	0.996183	0.003817	0.251908	0.5	0.698473	1	0.339695	0.064885	0.59542	0.045977	0.084291	0	0.003817	0.290076	0.515267	0.774809	1	0.015267	0.080153	0.09542	0.293893	0.969466	0.030534	0.244275	0.549618	0.755725	0.958015	0.503817	0.45977	0.015267	0.339695	0.549618	0.717557	0.977099	0.381679
0.41637	0.238434	0.345196	0.157143	0.307143	0.167857	0.032028	0.270463	0.505338	0.768683	0.989324	0.014235	0.231317	0.491103	0.718861	1	0.003559	0.234875	0.483986	0.711744	0.985765	0.3879	0.188612	0.423488	0.057143	0.078571	0	0.003559	0.19573	0.434164	0.704626	1	0.007117	0.295374	0.441281	0.644128	0.740214	0.053381	0.256228	0.537367	0.83274	0.992883	0.55516	0.414286	0.007117	0.245552	0.476868	0.66548	0.985765	0.224199
0.488235	0.264706	0.247059	0.272189	0.201183	0.201183	0.029412	0.235294	0.494118	0.794118	0.994118	0.011765	0.205882	0.441176	0.729412	0.988235	0.005882	0.294118	0.517647	0.652941	1	0.770588	0.041176	0.188235	0.053254	0.029586	0.005917	0.005882	0.188235	0.441176	0.8	1	0.358824	0.358824	0.470588	0.741176	0.852941	0.394118	0.435294	0.570588	0.617647	0.705882	0.247059	0.284024	0.047059	0.405882	0.570588	0.647059	0.976471	0.252941
0.345196	0.405694	0.24911	0.282143	0.167857	0.207143	0.017794	0.263345	0.508897	0.864769	0.996441	0.010676	0.298932	0.572954	0.743772	1	0.003559	0.185053	0.409253	0.569395	0.967972	0.683274	0.120996	0.19573	0.064286	0.071429	0	0.003559	0.362989	0.565836	0.765125	1	0.039146	0.135231	0.19573	0.298932	0.822064	0.081851	0.227758	0.341637	0.857651	0.975089	0.430605	0.342857	0.035587	0.202847	0.476868	0.604982	0.967972	0.380783
0.404138	0.256552	0.33931	0.205801	0.270718	0.191989	0.002759	0.246897	0.506207	0.773793	1	0.015172	0.268966	0.503448	0.73931	0.997241	0.001379	0.238621	0.475862	0.725517	0.994483	0.445517	0.238621	0.315862	0.087017	0.053867	0.004144	0.001379	0.244138	0.445517	0.743448	1	0.064828	0.188966	0.412414	0.851034	0.950345	0.002759	0.317241	0.590345	0.711724	0.84	0.522759	0.361878	0.006897	0.275862	0.488276	0.728276	0.950345	0.268966
0.339568	0.464748	0.195683	0.29683	0.131124	0.164265	0.002878	0.22446	0.428777	0.738129	1	0.007194	0.240288	0.502158	0.741007	0.997122	0.001439	0.352518	0.604317	0.784173	0.992806	0.697842	0.096403	0.205755	0.063401	0.060519	0.005764	0.001439	0.21295	0.456115	0.732374	1	0.053237	0.243165	0.506475	0.782734	0.98705	0.035971	0.348201	0.633094	0.811511	0.974101	0.368345	0.345821	0.025899	0.27482	0.582734	0.771223	0.992806	0.433094
0.344985	0.369301	0.285714	0.270928	0.191781	0.191781	0.004559	0.232523	0.466565	0.740122	0.99696	0.007599	0.217325	0.515198	0.756839	0.99848	0.00152	0.288754	0.510638	0.727964	1	0.489362	0.133739	0.3769	0.039574	0.073059	0.009132	0.00152	0.158055	0.474164	0.787234	1	0.004559	0.303951	0.484802	0.600304	0.75228	0.010638	0.325228	0.566869	0.772036	0.908815	0.50304	0.374429	0.00304	0.276596	0.486322	0.712766	0.993921	0.395137
0.250755	0.425982	0.323263	0.187879	0.178788	0.272727	0.006042	0.259819	0.528701	0.776435	1	0.012085	0.205438	0.471299	0.703927	0.996979	0.003021	0.265861	0.486405	0.746224	0.978852	0.601208	0.256798	0.141994	0.075758	0.039394	0.00303	0.003021	0.175227	0.519637	0.773414	1	0.012085	0.274924	0.410876	0.628399	0.930514	0.033233	0.335347	0.483384	0.734139	0.978852	0.577039	0.345455	0.012085	0.232628	0.438066	0.673716	0.978852	0.444109
0.407407	0.333333	0.259259	0.308411	0.186916	0.196262	0.027778	0.203704	0.509259	0.722222	1	0.018519	0.222222	0.388889	0.703704	0.962963	0.009259	0.416667	0.564815	0.833333	0.981481	0.675926	0.046296	0.277778	0.056075	0.074766	0	0.009259	0.166667	0.351852	0.537037	1	0.194444	0.194444	0.203704	0.509259	0.685185	0.546296	0.611111	0.824074	0.888889	0.972222	0.361111	0.429907	0.037037	0.444444	0.62963	0.861111	0.981481	0.361111
0.356164	0.383562	0.260274	0.282759	0.186207	0.2	0.041096	0.212329	0.506849	0.739726	0.972603	0.013699	0.239726	0.445205	0.712329	0.986301	0.006849	0.246575	0.59589	0.780822	1	0.486301	0.212329	0.30137	0.068966	0.055172	0	0.006849	0.267123	0.390411	0.650685	1	0.184932	0.458904	0.609589	0.80137	0.890411	0.034247	0.10274	0.541096	0.69863	0.965753	0.315068	0.441379	0.075342	0.438356	0.589041	0.760274	0.979452	0.363014
0.388383	0.369021	0.242597	0.287343	0.191562	0.173318	0.004556	0.323462	0.595672	0.816629	0.998861	0.002278	0.224374	0.473804	0.722096	0.994305	0.001139	0.214123	0.411162	0.646925	1	0.501139	0.120729	0.378132	0.051311	0.085519	0.003421	0.001139	0.214123	0.550114	0.790433	1	0.045558	0.258542	0.41344	0.657175	0.867882	0.059226	0.266515	0.472665	0.675399	0.98861	0.403189	0.330673	0.004556	0.222096	0.414579	0.6082	0.980638	0.405467
0.40081	0.323887	0.275304	0.284553	0.203252	0.182927	0.016194	0.230769	0.51417	0.753036	0.995951	0.008097	0.283401	0.510121	0.789474	1	0.004049	0.246964	0.449393	0.651822	0.983806	0.291498	0.109312	0.59919	0.03252	0.105691	0	0.004049	0.182186	0.34413	0.708502	1	0.469636	0.801619	0.846154	0.882591	0.910931	0.032389	0.275304	0.481781	0.647773	0.979757	0.493927	0.357724	0.032389	0.271255	0.469636	0.668016	0.983806	0.287449
0.4	0.314286	0.285714	0.318841	0.246377	0.173913	0.042857	0.342857	0.642857	0.828571	1	0.028571	0.171429	0.442857	0.628571	0.985714	0.014286	0.142857	0.414286	0.614286	0.9	0.457143	0.171429	0.371429	0.144928	0.086957	0	0.014286	0.157143	0.342857	0.628571	1	0.042857	0.085714	0.3	0.414286	0.457143	0.5	0.571429	0.785714	0.871429	0.971429	0.357143	0.434783	0.057143	0.214286	0.328571	0.571429	0.9	0.342857
0.300752	0.330827	0.368421	0.212121	0.181818	0.242424	0.045113	0.263158	0.443609	0.646617	0.954887	0.015038	0.225564	0.578947	0.774436	0.947368	0.007519	0.24812	0.458647	0.744361	1	0.353383	0.360902	0.285714	0.174242	0.05303	0.007576	0.007519	0.330827	0.56391	0.729323	1	0.18797	0.398496	0.541353	0.81203	0.992481	0.037594	0.097744	0.255639	0.323308	0.917293	0.466165	0.424242	0.030075	0.233083	0.556391	0.789474	0.992481	0.293233
0.37931	0.352087	0.268603	0.285455	0.198182	0.183636	0.00726	0.255898	0.537205	0.749546	0.994555	0.00363	0.232305	0.408348	0.709619	0.998185	0.001815	0.248639	0.53539	0.767695	1	0.540835	0.14882	0.310345	0.061818	0.065455	0.003636	0.001815	0.252269	0.439201	0.747731	1	0.041742	0.23775	0.491833	0.588022	0.807623	0.018149	0.274047	0.640653	0.833031	0.978221	0.459165	0.338182	0.010889	0.283122	0.586207	0.780399	0.983666	0.37931
0.39521	0.275449	0.329341	0.210843	0.301205	0.210843	0.017964	0.245509	0.54491	0.826347	1	0.011976	0.203593	0.491018	0.706587	0.922156	0.005988	0.215569	0.461078	0.712575	0.988024	0.365269	0.191617	0.443114	0.060241	0.084337	0	0.005988	0.131737	0.371257	0.664671	1	0.023952	0.305389	0.353293	0.556886	0.820359	0.137725	0.437126	0.658683	0.850299	0.988024	0.407186	0.481928	0.02994	0.239521	0.461078	0.736527	0.988024	0.311377
0.374384	0.310345	0.315271	0.2357	0.247535	0.206114	0.004926	0.202956	0.439409	0.743842	0.99803	0.00197	0.234483	0.528079	0.745813	0.993103	0.000985	0.320197	0.538916	0.759606	1	0.470936	0.110345	0.418719	0.043393	0.092702	0.003945	0.000985	0.151724	0.433498	0.771429	1	0.008867	0.525123	0.611823	0.93399	0.994089	0.003941	0.298522	0.482759	0.707389	0.99803	0.430542	0.386588	0.003941	0.357635	0.551724	0.738916	0.996059	0.358621
0.392321	0.305509	0.30217	0.250836	0.225753	0.190635	0.021703	0.228715	0.465776	0.737896	1	0.005008	0.230384	0.504174	0.786311	0.998331	0.001669	0.287145	0.517529	0.729549	0.996661	0.347245	0.038397	0.614357	0.018395	0.091973	0.005017	0.001669	0.328881	0.616027	0.891486	1	0.006678	0.016694	0.131886	0.434057	0.813022	0.026711	0.24374	0.492487	0.686144	0.994992	0.462437	0.367893	0.005008	0.235392	0.470785	0.702838	0.996661	0.307179
0.288298	0.511702	0.2	0.266241	0.134185	0.15655	0.007447	0.190426	0.412766	0.617021	0.994681	0.002128	0.344681	0.629787	0.819149	1	0.001064	0.140426	0.393617	0.601064	0.998936	0.741489	0.034043	0.224468	0.021299	0.055378	0	0.001064	0.345745	0.6	0.806383	1	0.026596	0.243617	0.296809	0.43617	0.989362	0.008511	0.075532	0.152128	0.473404	0.974468	0.502128	0.342918	0.004255	0.401064	0.665957	0.852128	0.995745	0.496809
0.360775	0.271186	0.368039	0.196602	0.240291	0.201456	0.012107	0.249395	0.532688	0.774818	0.987893	0.004843	0.239709	0.472155	0.699758	0.990315	0.002421	0.251816	0.486683	0.753027	1	0.358354	0.138015	0.503632	0.082524	0.106796	0.004854	0.002421	0.208232	0.539952	0.813559	1	0.038741	0.16707	0.513317	0.917676	0.997579	0.007264	0.25908	0.464891	0.702179	0.951574	0.583535	0.373786	0.007264	0.242131	0.457627	0.677966	0.995157	0.268765
0.355556	0.288889	0.355556	0.235955	0.292135	0.235955	0.077778	0.311111	0.566667	0.833333	1	0.022222	0.233333	0.455556	0.666667	0.933333	0.011111	0.177778	0.4	0.711111	0.977778	0.388889	0.466667	0.144444	0.101124	0.05618	0.011236	0.011111	0.088889	0.444444	0.866667	1	0.222222	0.355556	0.533333	0.666667	0.833333	0.1	0.122222	0.155556	0.766667	0.955556	0.444444	0.292135	0.088889	0.344444	0.477778	0.733333	0.955556	0.311111
0.459184	0.306122	0.234694	0.276923	0.220513	0.123077	0.015306	0.30102	0.566327	0.729592	1	0.010204	0.285714	0.678571	0.811224	0.979592	0.005102	0.158163	0.311224	0.489796	0.984694	0.576531	0.265306	0.158163	0.066667	0.025641	0.005128	0.005102	0.30102	0.69898	0.852041	1	0.096939	0.178571	0.270408	0.428571	0.785714	0.061224	0.464286	0.581633	0.622449	0.663265	0.321429	0.25641	0.020408	0.168367	0.260204	0.469388	0.984694	0.326531
0.310345	0.431034	0.258621	0.306358	0.17341	0.179191	0.028736	0.229885	0.54023	0.735632	1	0.011494	0.183908	0.511494	0.747126	0.977011	0.005747	0.247126	0.454023	0.724138	0.994253	0.591954	0.172414	0.235632	0.069364	0.080925	0	0.005747	0.16092	0.436782	0.701149	1	0.218391	0.252874	0.5	0.574713	0.95977	0.137931	0.321839	0.678161	0.752874	0.91954	0.436782	0.393064	0.017241	0.298851	0.477011	0.706897	0.965517	0.413793
0.309255	0.496614	0.194131	0.273756	0.147059	0.149321	0.004515	0.300226	0.469526	0.733634	0.997743	0.015801	0.185102	0.544018	0.790068	1	0.002257	0.291196	0.478555	0.604966	0.972912	0.724605	0.065463	0.209932	0.024887	0.052036	0.002262	0.002257	0.185102	0.532731	0.785553	1	0.34763	0.361174	0.397291	0.44921	0.896163	0.020316	0.275395	0.476298	0.593679	0.936795	0.458239	0.38009	0.024831	0.370203	0.602709	0.760722	0.993228	0.48307
0.40367	0.275229	0.321101	0.203704	0.25	0.222222	0.027523	0.302752	0.633028	0.816514	1	0.018349	0.211009	0.53211	0.678899	0.990826	0.009174	0.201835	0.394495	0.577982	0.981651	0.522936	0.302752	0.174312	0.101852	0.046296	0.027778	0.009174	0.275229	0.669725	0.798165	1	0.201835	0.302752	0.40367	0.504587	0.926606	0.073394	0.100917	0.146789	0.53211	0.908257	0.449541	0.314815	0.06422	0.247706	0.40367	0.559633	0.981651	0.284404
0.379971	0.33137	0.28866	0.255162	0.225664	0.171091	0.007364	0.21944	0.493373	0.75405	0.998527	0.004418	0.151694	0.427099	0.720177	1	0.001473	0.381443	0.578792	0.759941	0.995582	0.544919	0.142857	0.312224	0.048673	0.066372	0.007375	0.001473	0.148748	0.291605	0.628866	1	0.0162	0.509573	0.677467	0.801178	0.916053	0.125184	0.446244	0.606775	0.821797	0.989691	0.455081	0.327434	0.004418	0.416789	0.57732	0.78056	0.994109	0.37408
0.391555	0.301344	0.307102	0.230769	0.215385	0.198077	0.003839	0.337812	0.59309	0.823417	0.998081	0.011516	0.190019	0.433781	0.68714	1	0.001919	0.209213	0.426104	0.644914	0.990403	0.428023	0.143954	0.428023	0.046154	0.088462	0.007692	0.001919	0.241843	0.602687	0.873321	1	0.090211	0.289827	0.428023	0.587332	0.681382	0.017274	0.230326	0.466411	0.740883	0.988484	0.474088	0.319231	0.011516	0.1881	0.380038	0.600768	0.934741	0.347409
0.349112	0.352663	0.298225	0.218009	0.204976	0.218009	0.007101	0.23432	0.433136	0.71716	1	0.002367	0.228402	0.491124	0.759763	0.99645	0.001183	0.293491	0.553846	0.757396	0.997633	0.512426	0.102959	0.384615	0.0391	0.074645	0.003555	0.001183	0.247337	0.376331	0.624852	1	0.033136	0.576331	0.700592	0.785799	0.99645	0.00355	0.182249	0.586982	0.804734	0.984615	0.459172	0.381517	0.005917	0.336095	0.583432	0.782249	0.995266	0.391716
0.348123	0.385666	0.266212	0.229452	0.171233	0.202055	0.075085	0.365188	0.617747	0.832765	1	0.006826	0.16041	0.392491	0.610922	0.996587	0.003413	0.197952	0.542662	0.723549	0.969283	0.59727	0.122867	0.279863	0.068493	0.068493	0	0.003413	0.208191	0.440273	0.720137	1	0.03413	0.194539	0.474403	0.706485	0.843003	0.153584	0.307167	0.576792	0.808874	0.938567	0.467577	0.328767	0.030717	0.293515	0.505119	0.716724	0.969283	0.40273
0.484375	0.242188	0.273438	0.19685	0.314961	0.11811	0.039062	0.257812	0.492188	0.773438	1	0.015625	0.15625	0.546875	0.898438	0.984375	0.007812	0.148438	0.382812	0.609375	0.796875	0.328125	0.289062	0.382812	0.070866	0.055118	0.007874	0.007812	0.304688	0.484375	0.796875	1	0.03125	0.09375	0.40625	0.515625	0.765625	0.164062	0.25	0.632812	0.828125	0.929688	0.390625	0.346457	0.054688	0.210938	0.4375	0.609375	0.773438	0.242188
0.30491	0.310078	0.385013	0.183938	0.243523	0.246114	0.01292	0.193798	0.49354	0.764858	1	0.005168	0.312661	0.498708	0.74677	0.981912	0.002584	0.22739	0.490956	0.731266	0.992248	0.356589	0.217054	0.426357	0.080311	0.069948	0.002591	0.002584	0.22739	0.459948	0.795866	1	0.02584	0.206718	0.397933	0.537468	0.901809	0.064599	0.320413	0.607235	0.775194	0.992248	0.594315	0.414508	0.020672	0.286822	0.50646	0.741602	0.992248	0.322997
0.283978	0.447514	0.268508	0.21792	0.18031	0.220133	0.00884	0.232044	0.436464	0.674033	0.998895	0.003315	0.278453	0.59558	0.777901	0.996685	0.001105	0.227624	0.427624	0.687293	1	0.60663	0.124862	0.268508	0.063053	0.058628	0.003319	0.001105	0.303867	0.59116	0.776796	1	0.029834	0.19337	0.324862	0.470718	0.814365	0.00442	0.21326	0.38895	0.767956	0.956906	0.483978	0.435841	0.00442	0.296133	0.569061	0.775691	0.99116	0.443094
0.341667	0.308333	0.35	0.205021	0.246862	0.205021	0.008333	0.254167	0.475	0.745833	0.9875	0.029167	0.2	0.483333	0.795833	0.991667	0.004167	0.245833	0.525	0.725	1	0.491667	0.2875	0.220833	0.07113	0.054393	0.012552	0.004167	0.179167	0.470833	0.829167	1	0.016667	0.2125	0.329167	0.683333	0.983333	0.283333	0.391667	0.6	0.770833	0.925	0.45	0.32636	0.020833	0.320833	0.525	0.7	0.995833	0.354167
0.375	0.350962	0.274038	0.280193	0.198068	0.241546	0.009615	0.230769	0.509615	0.730769	1	0.024038	0.307692	0.514423	0.783654	0.990385	0.004808	0.211538	0.432692	0.716346	0.980769	0.331731	0.283654	0.384615	0.10628	0.048309	0	0.004808	0.216346	0.471154	0.798077	1	0.014423	0.197115	0.403846	0.634615	0.990385	0.052885	0.322115	0.576923	0.730769	0.879808	0.451923	0.463768	0.019231	0.288462	0.514423	0.701923	0.980769	0.326923
0.4	0.2	0.4	0.202703	0.297297	0.148649	0.026667	0.226667	0.44	0.64	1	0.146667	0.213333	0.613333	0.8	0.933333	0.013333	0.173333	0.466667	0.76	0.986667	0.346667	0.32	0.333333	0.108108	0.054054	0	0.013333	0.24	0.52	0.64	1	0.253333	0.32	0.453333	0.906667	0.986667	0.026667	0.093333	0.173333	0.733333	0.826667	0.44	0.405405	0.053333	0.28	0.56	0.733333	0.946667	0.226667
0.411765	0.323529	0.264706	0.237037	0.214815	0.162963	0.029412	0.242647	0.544118	0.772059	1	0.014706	0.220588	0.514706	0.779412	0.955882	0.007353	0.264706	0.404412	0.683824	0.926471	0.441176	0.191176	0.367647	0.051852	0.081481	0.022222	0.007353	0.220588	0.705882	0.830882	1	0.154412	0.191176	0.676471	0.889706	0.941176	0.029412	0.25	0.375	0.5	0.639706	0.433824	0.444444	0.051471	0.294118	0.514706	0.742647	0.926471	0.323529
0.292135	0.5	0.207865	0.305085	0.101695	0.186441	0.02809	0.207865	0.426966	0.702247	0.91573	0.011236	0.292135	0.61236	0.831461	1	0.005618	0.11236	0.41573	0.533708	0.97191	0.752809	0.146067	0.101124	0.084746	0.039548	0.016949	0.005618	0.258427	0.55618	0.775281	1	0.314607	0.393258	0.5	0.601124	0.876404	0.039326	0.05618	0.089888	0.11236	0.842697	0.38764	0.293785	0.022472	0.325843	0.494382	0.735955	0.97191	0.516854
0.356223	0.424893	0.218884	0.301724	0.116379	0.206897	0.012876	0.141631	0.381974	0.785408	1	0.008584	0.317597	0.532189	0.716738	0.995708	0.004292	0.304721	0.51073	0.695279	0.905579	0.429185	0.175966	0.39485	0.068966	0.068966	0.008621	0.004292	0.107296	0.270386	0.575107	1	0.2103	0.27897	0.339056	0.523605	0.60515	0.193133	0.618026	0.751073	0.88412	0.982833	0.454936	0.327586	0.038627	0.351931	0.553648	0.678112	0.918455	0.450644
0.391304	0.271739	0.336957	0.191257	0.300546	0.174863	0.016304	0.206522	0.375	0.744565	0.994565	0.043478	0.358696	0.554348	0.733696	1	0.005435	0.184783	0.532609	0.73913	0.98913	0.347826	0.086957	0.565217	0.054645	0.087432	0	0.005435	0.211957	0.505435	0.836957	1	0.119565	0.75	0.798913	0.820652	0.869565	0.01087	0.244565	0.418478	0.625	0.945652	0.445652	0.502732	0.027174	0.266304	0.516304	0.690217	0.978261	0.304348
0.354198	0.377099	0.268702	0.25841	0.174312	0.200306	0.00458	0.224427	0.509924	0.8	1	0.003053	0.250382	0.471756	0.731298	0.993893	0.001527	0.265649	0.517557	0.708397	0.99542	0.523664	0.158779	0.317557	0.061162	0.058104	0.003058	0.001527	0.251908	0.505344	0.763359	1	0.045802	0.265649	0.473282	0.570992	0.874809	0.061069	0.244275	0.552672	0.824427	0.99542	0.448855	0.357798	0.019847	0.244275	0.526718	0.70687	0.99542	0.410687
0.317181	0.351164	0.331655	0.209068	0.222922	0.22796	0.001259	0.246067	0.473254	0.751416	0.996224	0.005035	0.229704	0.510384	0.765261	0.998112	0.000629	0.268722	0.505979	0.737571	1	0.451857	0.126495	0.421649	0.051637	0.081864	0.005038	0.000629	0.293266	0.535557	0.75708	1	0.003147	0.294525	0.487099	0.599119	0.98112	0.008181	0.240403	0.445563	0.743864	0.996853	0.518565	0.381612	0.003147	0.24292	0.487728	0.701699	0.995595	0.372561
0.441727	0.305036	0.253237	0.255043	0.197406	0.184438	0.002878	0.283453	0.507914	0.720863	0.998561	0.008633	0.233094	0.494964	0.753957	1	0.001439	0.227338	0.446043	0.795683	0.994245	0.397122	0.047482	0.555396	0.023055	0.083573	0.002882	0.001439	0.146763	0.381295	0.765468	1	0.03741	0.08777	0.241727	0.264748	0.805755	0.010072	0.382734	0.568345	0.72518	0.995683	0.353957	0.377522	0.015827	0.221583	0.42446	0.743885	0.992806	0.320863
0.394937	0.263291	0.341772	0.19797	0.291878	0.208122	0.005063	0.227848	0.475949	0.764557	1	0.012658	0.298734	0.577215	0.75443	0.989873	0.002532	0.225316	0.470886	0.726582	0.994937	0.321519	0.270886	0.407595	0.083756	0.068528	0.002538	0.002532	0.227848	0.546835	0.751899	1	0.106329	0.35443	0.473418	0.610127	0.918987	0.005063	0.255696	0.524051	0.855696	0.994937	0.493671	0.390863	0.010127	0.286076	0.526582	0.729114	0.994937	0.278481
0.402174	0.358696	0.23913	0.373626	0.186813	0.175824	0.054348	0.25	0.5	0.76087	1	0.021739	0.23913	0.521739	0.728261	0.98913	0.01087	0.141304	0.413043	0.597826	0.934783	0.315217	0.271739	0.413043	0.087912	0.10989	0.021978	0.01087	0.456522	0.673913	0.75	1	0.065217	0.130435	0.76087	0.826087	0.945652	0.032609	0.25	0.358696	0.5	0.978261	0.347826	0.43956	0.065217	0.326087	0.532609	0.695652	0.956522	0.391304
0.326316	0.397895	0.275789	0.225738	0.166667	0.202532	0.016842	0.176842	0.376842	0.682105	0.981053	0.004211	0.269474	0.496842	0.728421	1	0.002105	0.357895	0.608421	0.821053	0.987368	0.530526	0.454737	0.014737	0.168776	0.004219	0	0.002105	0.16	0.44	0.726316	1	0.101053	0.355789	0.564211	0.776842	0.995789	0.006316	0.006316	0.010526	0.014737	0.018947	0.557895	0.371308	0.010526	0.324211	0.541053	0.741053	0.997895	0.425263
0.341463	0.382114	0.276423	0.278689	0.196721	0.245902	0.01626	0.195122	0.504065	0.699187	0.99187	0.02439	0.211382	0.479675	0.731707	0.97561	0.00813	0.276423	0.487805	0.756098	1	0.349593	0.219512	0.430894	0.081967	0.065574	0	0.00813	0.211382	0.414634	0.756098	1	0.252033	0.292683	0.373984	0.463415	0.853659	0.065041	0.162602	0.609756	0.715447	0.95935	0.447154	0.278689	0.121951	0.300813	0.471545	0.788618	0.98374	0.382114
0.344	0.392	0.264	0.290323	0.145161	0.217742	0.136	0.312	0.536	0.728	0.992	0.016	0.208	0.448	0.736	1	0.008	0.176	0.456	0.72	0.96	0.392	0.184	0.424	0.064516	0.080645	0	0.008	0.24	0.392	0.72	1	0.04	0.288	0.336	0.456	0.768	0.096	0.208	0.6	0.848	0.96	0.52	0.274194	0.032	0.2	0.456	0.656	0.96	0.456
0.361702	0.414894	0.223404	0.344086	0.150538	0.11828	0.031915	0.223404	0.606383	0.776596	0.978723	0.021277	0.276596	0.489362	0.797872	1	0.010638	0.180851	0.351064	0.478723	0.712766	0.670213	0.234043	0.095745	0.107527	0.021505	0	0.010638	0.234043	0.56383	0.829787	1	0.12766	0.170213	0.276596	0.382979	0.553191	0.606383	0.617021	0.638298	0.659574	0.691489	0.319149	0.344086	0.06383	0.191489	0.404255	0.489362	0.691489	0.457447
0.294872	0.394872	0.310256	0.254499	0.161954	0.290488	0.015385	0.241026	0.515385	0.751282	0.984615	0.005128	0.230769	0.461538	0.717949	0.992308	0.002564	0.274359	0.525641	0.748718	1	0.458974	0.079487	0.461538	0.046272	0.097686	0	0.002564	0.215385	0.45641	0.746154	1	0.153846	0.528205	0.825641	0.869231	0.997436	0.007692	0.264103	0.476923	0.710256	0.951282	0.466667	0.421594	0.007692	0.3	0.541026	0.753846	0.994872	0.369231
0.388235	0.329412	0.282353	0.25	0.214286	0.178571	0.070588	0.223529	0.517647	0.658824	1	0.058824	0.341176	0.623529	0.835294	0.988235	0.011765	0.152941	0.352941	0.6	0.894118	0.317647	0.305882	0.376471	0.119048	0.047619	0	0.011765	0.188235	0.435294	0.917647	1	0.023529	0.082353	0.235294	0.341176	0.494118	0.517647	0.6	0.694118	0.811765	0.905882	0.388235	0.47619	0.023529	0.211765	0.4	0.564706	0.929412	0.4
0.340278	0.399306	0.260417	0.273043	0.144348	0.203478	0.005208	0.199653	0.418403	0.708333	0.994792	0.006944	0.248264	0.522569	0.743056	0.996528	0.001736	0.309028	0.567708	0.776042	1	0.539931	0.125	0.335069	0.048696	0.086957	0.003478	0.001736	0.164931	0.34375	0.637153	1	0.236111	0.571181	0.696181	0.871528	0.960069	0.005208	0.380208	0.588542	0.791667	0.991319	0.520833	0.365217	0.008681	0.322917	0.538194	0.743056	0.986111	0.432292
0.416404	0.343849	0.239748	0.262658	0.158228	0.199367	0.028391	0.277603	0.536278	0.760252	1	0.006309	0.201893	0.460568	0.769716	0.993691	0.003155	0.246057	0.44164	0.665615	0.921136	0.637224	0.135647	0.227129	0.056962	0.063291	0	0.003155	0.176656	0.495268	0.77918	1	0.15142	0.242902	0.353312	0.85489	0.940063	0.072555	0.328076	0.523659	0.624606	0.842271	0.274448	0.322785	0.044164	0.249211	0.378549	0.599369	0.917981	0.353312
0.448598	0.364486	0.186916	0.276995	0.150235	0.14554	0.014019	0.200935	0.457944	0.635514	1	0.009346	0.317757	0.556075	0.803738	0.995327	0.004673	0.242991	0.565421	0.813084	0.985981	0.593458	0.018692	0.38785	0.018779	0.037559	0	0.004673	0.341121	0.691589	0.841121	1	0.373832	0.373832	0.378505	0.873832	0.878505	0.065421	0.154206	0.266355	0.537383	0.668224	0.294393	0.356808	0.079439	0.247664	0.640187	0.836449	0.985981	0.406542
0.345992	0.362869	0.291139	0.279661	0.15678	0.237288	0.008439	0.227848	0.472574	0.772152	1	0.012658	0.21097	0.438819	0.666667	0.966245	0.004219	0.333333	0.582278	0.776371	0.987342	0.64135	0.236287	0.122363	0.088983	0.04661	0.004237	0.004219	0.206751	0.459916	0.71308	1	0.016878	0.57384	0.64557	0.886076	0.991561	0.135021	0.160338	0.261603	0.443038	0.974684	0.451477	0.389831	0.016878	0.388186	0.582278	0.767932	0.987342	0.42616
0.398058	0.330097	0.271845	0.235294	0.176471	0.196078	0.029126	0.145631	0.330097	0.592233	0.970874	0.019417	0.359223	0.582524	0.796117	0.990291	0.009709	0.262136	0.514563	0.825243	1	0.368932	0.029126	0.601942	0.019608	0.098039	0	0.009709	0.378641	0.631068	0.776699	1	0.951456	0.951456	0.951456	0.961165	0.970874	0.029126	0.165049	0.38835	0.61165	0.883495	0.368932	0.411765	0.126214	0.300971	0.640777	0.796117	0.951456	0.300971
0.373134	0.30597	0.320896	0.234414	0.254364	0.194514	0.00995	0.263682	0.465174	0.723881	0.992537	0.004975	0.159204	0.495025	0.753731	0.997512	0.002488	0.28607	0.529851	0.771144	1	0.405473	0.228856	0.365672	0.089776	0.064838	0.009975	0.002488	0.363184	0.579602	0.751244	1	0.08209	0.455224	0.71393	0.838308	0.925373	0.007463	0.156716	0.281095	0.435323	0.995025	0.5199	0.418953	0.014925	0.241294	0.524876	0.766169	0.995025	0.363184
0.357955	0.306818	0.335227	0.245714	0.245714	0.211429	0.017045	0.232955	0.471591	0.647727	0.965909	0.028409	0.267045	0.539773	0.8125	0.988636	0.005682	0.198864	0.494318	0.755682	1	0.431818	0.306818	0.261364	0.142857	0.062857	0.005714	0.005682	0.369318	0.585227	0.721591	1	0.130682	0.323864	0.431818	0.846591	0.994318	0.022727	0.079545	0.210227	0.5625	0.9375	0.448864	0.422857	0.022727	0.221591	0.579545	0.818182	0.994318	0.284091
0.359667	0.334719	0.305613	0.227083	0.235417	0.216667	0.02079	0.243243	0.471933	0.742204	0.989605	0.004158	0.266112	0.588358	0.844075	1	0.002079	0.234927	0.449064	0.650728	0.991684	0.403326	0.367983	0.22869	0.095833	0.058333	0.020833	0.002079	0.22869	0.50104	0.735967	1	0.02079	0.261954	0.463617	0.663202	0.898129	0.039501	0.245322	0.596674	0.900208	0.991684	0.440748	0.4	0.006237	0.27027	0.474012	0.677755	0.991684	0.367983
0.375427	0.38339	0.241183	0.225513	0.173121	0.166287	0.002275	0.292378	0.522184	0.74744	0.998862	0.015927	0.17975	0.409556	0.638225	0.997725	0.001138	0.301479	0.654152	0.821388	1	0.593857	0.035267	0.370876	0.019362	0.092255	0.007973	0.001138	0.220705	0.390216	0.546075	1	0.040956	0.094425	0.12628	0.229807	0.346985	0.012514	0.634812	0.761092	0.87372	0.992036	0.54835	0.394077	0.003413	0.226394	0.511945	0.757679	0.990899	0.362912
0.337004	0.328194	0.334802	0.205298	0.249448	0.161148	0.004405	0.222467	0.484581	0.753304	0.995595	0.011013	0.242291	0.486784	0.735683	0.977974	0.002203	0.277533	0.513216	0.757709	1	0.400881	0.185022	0.414097	0.066225	0.083885	0.004415	0.002203	0.26652	0.497797	0.746696	1	0.11674	0.273128	0.647577	0.770925	0.955947	0.017621	0.209251	0.451542	0.702643	0.997797	0.544053	0.401766	0.015419	0.277533	0.480176	0.711454	0.991189	0.348018
0.437016	0.322674	0.24031	0.262852	0.200776	0.152279	0.002907	0.16376	0.40407	0.741279	0.998062	0.001938	0.286822	0.534884	0.761628	0.997093	0.000969	0.372093	0.545543	0.732558	1	0.496124	0.125969	0.377907	0.050436	0.075655	0.00582	0.000969	0.176357	0.356589	0.69186	1	0.008721	0.460271	0.57655	0.695736	0.999031	0.061047	0.371124	0.58624	0.793605	0.987403	0.392442	0.325897	0.007752	0.407946	0.552326	0.718023	0.997093	0.360465
0.339726	0.386301	0.273973	0.228022	0.211538	0.236264	0.005479	0.20274	0.520548	0.769863	0.994521	0.013699	0.254795	0.457534	0.70137	1	0.00274	0.265753	0.528767	0.747945	0.969863	0.69589	0.057534	0.246575	0.098901	0.098901	0.005495	0.00274	0.230137	0.468493	0.720548	1	0.019178	0.257534	0.40274	0.526027	0.857534	0.084932	0.339726	0.646575	0.8	0.994521	0.30137	0.505495	0.013699	0.271233	0.512329	0.734247	0.989041	0.383562
0.451282	0.317949	0.230769	0.319588	0.170103	0.154639	0.010256	0.312821	0.6	0.789744	1	0.015385	0.271795	0.502564	0.758974	0.989744	0.005128	0.184615	0.34359	0.512821	0.979487	0.74359	0.158974	0.097436	0.072165	0.051546	0.010309	0.005128	0.297436	0.6	0.805128	1	0.148718	0.220513	0.353846	0.420513	0.851282	0.05641	0.071795	0.138462	0.569231	0.641026	0.34359	0.268041	0.020513	0.169231	0.312821	0.507692	0.897436	0.374359
0.30303	0.381313	0.315657	0.23038	0.235443	0.217722	0.005051	0.239899	0.479798	0.795455	0.997475	0.007576	0.234848	0.472222	0.709596	1	0.002525	0.262626	0.527778	0.755051	0.994949	0.363636	0.214646	0.421717	0.075949	0.081013	0	0.002525	0.300505	0.512626	0.805556	1	0.012626	0.141414	0.381313	0.517677	0.878788	0.04798	0.252525	0.580808	0.772727	0.989899	0.608586	0.410127	0.007576	0.282828	0.5	0.734848	0.994949	0.378788
0.354535	0.285041	0.360424	0.193396	0.246462	0.205189	0.004711	0.268551	0.514723	0.791519	1	0.003534	0.281508	0.507656	0.727915	0.998822	0.001178	0.203769	0.468787	0.722026	0.992933	0.3298	0.189635	0.480565	0.069575	0.083726	0.003538	0.001178	0.314488	0.539458	0.762073	1	0.146054	0.308598	0.546525	0.829211	0.995289	0.011779	0.166078	0.436985	0.689046	0.96702	0.542992	0.382075	0.010601	0.274441	0.475854	0.705536	0.992933	0.286219
0.293103	0.396552	0.310345	0.240444	0.196054	0.263872	0.002463	0.259852	0.5	0.761084	0.998768	0.004926	0.236453	0.511084	0.756158	1	0.001232	0.253695	0.490148	0.715517	0.997537	0.46798	0.231527	0.300493	0.094945	0.057953	0.003699	0.001232	0.195813	0.45936	0.743842	1	0.038177	0.263547	0.417488	0.796798	0.997537	0.006158	0.32266	0.57266	0.762315	0.991379	0.571429	0.401973	0.003695	0.258621	0.472906	0.738916	0.997537	0.453202
0.381443	0.313402	0.305155	0.239669	0.247934	0.181818	0.008247	0.23299	0.51134	0.754639	0.997938	0.004124	0.265979	0.492784	0.750515	0.985567	0.002062	0.253608	0.496907	0.740206	1	0.397938	0.179381	0.42268	0.070248	0.103306	0.004132	0.002062	0.290722	0.519588	0.773196	1	0.096907	0.239175	0.501031	0.748454	0.925773	0.006186	0.191753	0.453608	0.676289	0.995876	0.529897	0.409091	0.006186	0.270103	0.474227	0.707216	0.991753	0.346392
0.361905	0.342857	0.295238	0.240385	0.307692	0.182692	0.028571	0.209524	0.542857	0.72381	1	0.019048	0.257143	0.4	0.733333	0.990476	0.009524	0.219048	0.47619	0.780952	0.961905	0.380952	0.27619	0.342857	0.086538	0.048077	0.009615	0.009524	0.361905	0.533333	0.838095	1	0.028571	0.085714	0.438095	0.685714	0.961905	0.12381	0.2	0.571429	0.657143	0.819048	0.419048	0.519231	0.038095	0.257143	0.495238	0.695238	0.952381	0.352381
0.408163	0.29932	0.292517	0.232877	0.260274	0.19863	0.013605	0.258503	0.442177	0.748299	0.993197	0.088435	0.319728	0.564626	0.734694	1	0.006803	0.142857	0.469388	0.741497	0.979592	0.353741	0.312925	0.333333	0.130137	0.047945	0.006849	0.006803	0.142857	0.510204	0.748299	1	0.013605	0.244898	0.619048	0.891156	0.993197	0.170068	0.326531	0.408163	0.489796	0.829932	0.387755	0.479452	0.020408	0.204082	0.52381	0.727891	0.979592	0.306122
0.299383	0.37037	0.330247	0.210526	0.213622	0.216718	0.012346	0.283951	0.512346	0.762346	1	0.006173	0.20679	0.478395	0.728395	0.987654	0.003086	0.256173	0.453704	0.746914	0.993827	0.444444	0.216049	0.339506	0.065015	0.058824	0.003096	0.003086	0.169753	0.435185	0.651235	1	0.012346	0.231481	0.447531	0.759259	0.938272	0.021605	0.395062	0.589506	0.82716	0.975309	0.540123	0.334365	0.009259	0.262346	0.490741	0.737654	0.987654	0.361111
0.328592	0.361309	0.3101	0.270655	0.19943	0.252137	0.008535	0.28734	0.524893	0.780939	0.995733	0.002845	0.201991	0.450925	0.69559	1	0.001422	0.27596	0.523471	0.761024	0.998578	0.409673	0.186344	0.403983	0.086895	0.066952	0.007123	0.001422	0.302987	0.499289	0.796586	1	0.009957	0.186344	0.418208	0.890469	0.997155	0.032717	0.278805	0.550498	0.687055	0.927454	0.536273	0.378917	0.01138	0.26458	0.480797	0.708393	0.998578	0.376956
0.286401	0.412088	0.301511	0.234364	0.172509	0.245361	0.001374	0.261676	0.476648	0.728709	0.991071	0.002747	0.233516	0.524038	0.761676	0.999313	0.000687	0.255495	0.503434	0.75206	1	0.570055	0.348901	0.081044	0.119588	0.024742	0.006873	0.000687	0.252747	0.485577	0.71978	1	0.008929	0.247253	0.510989	0.762363	0.995192	0.041896	0.181319	0.399038	0.93544	0.989011	0.60783	0.290034	0.00206	0.265797	0.527473	0.765797	0.998626	0.441621
0.264612	0.432519	0.302869	0.223404	0.17234	0.271277	0.004251	0.21254	0.426142	0.687566	0.995749	0.002125	0.277365	0.545165	0.772582	1	0.001063	0.236982	0.497343	0.733262	0.993624	0.509033	0.138151	0.352816	0.058511	0.079787	0.009574	0.001063	0.29543	0.561105	0.782147	1	0.005313	0.320935	0.534538	0.611052	0.923486	0.018066	0.190223	0.4017	0.726886	0.992561	0.595112	0.419149	0.005313	0.277365	0.504782	0.737513	0.993624	0.446334
0.422018	0.192661	0.385321	0.12963	0.305556	0.148148	0.018349	0.165138	0.449541	0.642202	1	0.174312	0.348624	0.431193	0.697248	0.899083	0.009174	0.247706	0.577982	0.770642	0.990826	0.385321	0.174312	0.440367	0.046296	0.064815	0.009259	0.009174	0.091743	0.330275	0.724771	1	0.247706	0.275229	0.385321	0.431193	0.779817	0.100917	0.477064	0.587156	0.87156	0.981651	0.477064	0.37037	0.06422	0.376147	0.541284	0.752294	0.990826	0.165138
0.392857	0.25	0.357143	0.236364	0.254545	0.127273	0.053571	0.178571	0.5	0.732143	1	0.035714	0.125	0.321429	0.517857	0.910714	0.017857	0.375	0.553571	0.75	0.982143	0.607143	0.071429	0.321429	0.036364	0.072727	0	0.017857	0.142857	0.303571	0.517857	1	0.357143	0.357143	0.375	0.392857	0.410714	0.535714	0.589286	0.714286	0.785714	0.875	0.339286	0.363636	0.25	0.446429	0.625	0.75	0.928571	0.285714
0.377823	0.340862	0.281314	0.263374	0.193416	0.183128	0.004107	0.246407	0.505133	0.770021	0.997947	0.008214	0.250513	0.517454	0.767967	1	0.002053	0.234086	0.474333	0.698152	0.98768	0.525667	0.164271	0.310062	0.076132	0.076132	0.002058	0.002053	0.205339	0.529774	0.800821	1	0.024641	0.135524	0.474333	0.804928	0.98768	0.008214	0.36345	0.494867	0.683778	0.944559	0.466119	0.329218	0.008214	0.377823	0.511294	0.755647	0.98768	0.342916
0.394231	0.288462	0.317308	0.262136	0.184466	0.262136	0.048077	0.259615	0.528846	0.701923	0.961538	0.019231	0.192308	0.5	0.759615	0.990385	0.009615	0.221154	0.451923	0.711538	1	0.375	0.201923	0.423077	0.097087	0.07767	0	0.009615	0.201923	0.519231	0.865385	1	0.173077	0.442308	0.490385	0.740385	0.817308	0.048077	0.144231	0.394231	0.605769	0.971154	0.442308	0.466019	0.028846	0.240385	0.471154	0.721154	0.971154	0.307692
0.478788	0.284848	0.236364	0.262195	0.22561	0.115854	0.018182	0.157576	0.478788	0.745455	0.987879	0.012121	0.333333	0.448485	0.8	0.993939	0.006061	0.254545	0.515152	0.70303	1	0.436364	0.006061	0.557576	0.012195	0.121951	0	0.006061	0.212121	0.418182	0.806061	1	0.921212	0.921212	0.921212	0.921212	0.921212	0.030303	0.272727	0.533333	0.672727	0.987879	0.327273	0.353659	0.042424	0.351515	0.551515	0.69697	0.927273	0.315152
0.347737	0.308642	0.343621	0.2	0.263918	0.220619	0.004115	0.230453	0.520576	0.76749	1	0.018519	0.286008	0.479424	0.716049	0.993827	0.002058	0.220165	0.49177	0.726337	0.997942	0.37037	0.222222	0.407407	0.076289	0.080412	0.002062	0.002058	0.288066	0.528807	0.781893	1	0.006173	0.164609	0.339506	0.648148	0.987654	0.037037	0.257202	0.54321	0.746914	0.969136	0.590535	0.424742	0.006173	0.269547	0.475309	0.691358	0.987654	0.314815
0.380531	0.292035	0.327434	0.276786	0.25	0.1875	0.017699	0.159292	0.424779	0.690265	1	0.035398	0.256637	0.539823	0.778761	0.99115	0.00885	0.238938	0.442478	0.752212	0.982301	0.460177	0.442478	0.097345	0.098214	0.044643	0.008929	0.00885	0.150442	0.504425	0.716814	1	0.026549	0.292035	0.451327	0.60177	0.911504	0.097345	0.106195	0.920354	0.946903	0.973451	0.380531	0.535714	0.026549	0.221239	0.39823	0.734513	0.955752	0.265487
0.385496	0.299618	0.314885	0.223709	0.240918	0.189293	0.01145	0.209924	0.398855	0.688931	1	0.003817	0.354962	0.597328	0.79771	0.998092	0.001908	0.221374	0.5	0.721374	0.996183	0.183206	0.05916	0.757634	0.021033	0.059273	0.001912	0.001908	0.480916	0.688931	0.826336	1	0.410305	0.437023	0.492366	0.912214	0.984733	0.005725	0.192748	0.387405	0.69084	0.996183	0.486641	0.413002	0.005725	0.377863	0.593511	0.782443	0.992366	0.30916
0.502222	0.297778	0.2	0.245536	0.205357	0.111607	0.017778	0.182222	0.444444	0.733333	1	0.008889	0.271111	0.502222	0.866667	0.982222	0.004444	0.364444	0.528889	0.684444	0.995556	0.471111	0.102222	0.426667	0.035714	0.089286	0	0.004444	0.222222	0.373333	0.622222	1	0.342222	0.36	0.506667	0.657778	0.684444	0.017778	0.151111	0.635556	0.808889	0.991111	0.266667	0.267857	0.04	0.4	0.528889	0.742222	0.982222	0.351111
0.357909	0.348525	0.293566	0.230872	0.201342	0.2	0.004021	0.215818	0.502681	0.730563	0.993298	0.002681	0.257373	0.517426	0.816354	1	0.00134	0.246649	0.47319	0.717158	0.995979	0.549598	0.162198	0.288204	0.071141	0.079195	0.001342	0.00134	0.270777	0.525469	0.758713	1	0.096515	0.321716	0.577748	0.766756	0.997319	0.012064	0.140751	0.394102	0.678284	0.957105	0.475871	0.357047	0.012064	0.254692	0.474531	0.753351	0.997319	0.379357
0.38746	0.342444	0.270096	0.256039	0.247987	0.175523	0.004823	0.22508	0.488746	0.747588	1	0.003215	0.284566	0.533762	0.755627	0.996785	0.001608	0.228296	0.474277	0.729904	0.995177	0.379421	0.036977	0.583601	0.020934	0.059581	0.00161	0.001608	0.233119	0.59164	0.869775	1	0.118971	0.35209	0.432476	0.824759	0.885852	0.030547	0.249196	0.477492	0.667203	0.9791	0.442122	0.386473	0.022508	0.247588	0.491961	0.696141	0.993569	0.368167
0.479167	0.260417	0.260417	0.263158	0.231579	0.136842	0.03125	0.166667	0.375	0.635417	1	0.020833	0.354167	0.59375	0.739583	0.958333	0.010417	0.3125	0.541667	0.8125	0.979167	0.677083	0.020833	0.302083	0.042105	0.042105	0	0.010417	0.166667	0.333333	0.614583	1	0.354167	0.354167	0.354167	0.354167	0.645833	0.510417	0.572917	0.78125	0.854167	0.9375	0.322917	0.357895	0.145833	0.5	0.65625	0.854167	0.96875	0.3125
0.335329	0.377246	0.287425	0.256	0.186	0.228	0.003992	0.275449	0.552894	0.854291	1	0.00998	0.201597	0.403194	0.704591	0.996008	0.001996	0.297405	0.512974	0.700599	0.962076	0.44511	0.157685	0.397206	0.06	0.076	0.004	0.001996	0.115768	0.349301	0.702595	1	0.125749	0.397206	0.562874	0.746507	0.848303	0.0998	0.329341	0.548902	0.858283	0.984032	0.48503	0.328	0.005988	0.301397	0.491018	0.724551	0.924152	0.411178
0.390244	0.260163	0.349593	0.212245	0.302041	0.17551	0.012195	0.235772	0.48374	0.731707	0.995935	0.00813	0.268293	0.54878	0.821138	1	0.004065	0.239837	0.47561	0.699187	0.979675	0.321138	0.219512	0.45935	0.065306	0.065306	0	0.004065	0.109756	0.443089	0.857724	1	0.04065	0.280488	0.365854	0.772358	0.98374	0.113821	0.231707	0.5	0.682927	0.886179	0.520325	0.44898	0.020325	0.264228	0.556911	0.784553	0.98374	0.272358
0.391892	0.314189	0.293919	0.216949	0.250847	0.162712	0.006757	0.280405	0.469595	0.783784	0.986486	0.016892	0.209459	0.439189	0.685811	0.996622	0.003378	0.222973	0.557432	0.756757	1	0.5	0.125	0.375	0.054237	0.067797	0	0.003378	0.202703	0.415541	0.641892	1	0.064189	0.162162	0.219595	0.310811	0.574324	0.10473	0.587838	0.692568	0.861486	0.97973	0.452703	0.40678	0.016892	0.256757	0.547297	0.722973	0.989865	0.35473
0.477273	0.329545	0.193182	0.333333	0.172414	0.091954	0.034091	0.193182	0.420455	0.715909	0.954545	0.022727	0.25	0.556818	0.772727	1	0.011364	0.318182	0.545455	0.647727	0.943182	0.215909	0	0.784091	0	0.068966	0	0.011364	0.045455	0.727273	0.784091	1	0	0	0	0	0	0.090909	0.284091	0.477273	0.670455	0.965909	0.306818	0.413793	0.045455	0.363636	0.534091	0.659091	0.943182	0.352273
0.370031	0.357798	0.272171	0.245399	0.190184	0.220859	0.006116	0.198777	0.489297	0.727829	0.993884	0.009174	0.278287	0.510703	0.770642	0.990826	0.003058	0.256881	0.461774	0.70948	1	0.452599	0.12844	0.41896	0.058282	0.076687	0.009202	0.003058	0.321101	0.556575	0.764526	1	0.012232	0.391437	0.501529	0.691131	0.993884	0.06422	0.207951	0.35474	0.785933	0.95107	0.492355	0.398773	0.015291	0.296636	0.501529	0.721713	0.987768	0.345566
0.243816	0.498233	0.257951	0.216312	0.131206	0.262411	0.007067	0.212014	0.342756	0.650177	0.975265	0.010601	0.289753	0.54417	0.756184	1	0.003534	0.226148	0.508834	0.763251	0.992933	0.798587	0.120141	0.081272	0.056738	0.021277	0	0.003534	0.332155	0.55477	0.759717	1	0.120141	0.219081	0.279152	0.611307	0.992933	0.162544	0.176678	0.293286	0.314488	0.904594	0.572438	0.297872	0.021201	0.318021	0.55477	0.713781	0.992933	0.44523
0.424242	0.30303	0.272727	0.305344	0.221374	0.21374	0.022727	0.325758	0.515152	0.772727	1	0.015152	0.227273	0.530303	0.80303	0.992424	0.007576	0.143939	0.371212	0.659091	0.954545	0.530303	0.113636	0.356061	0.045802	0.091603	0	0.007576	0.295455	0.712121	0.840909	1	0.022727	0.037879	0.128788	0.159091	0.954545	0.204545	0.310606	0.484848	0.613636	0.704545	0.416667	0.48855	0.015152	0.159091	0.371212	0.681818	0.954545	0.310606
0.3675	0.28	0.3525	0.192982	0.303258	0.218045	0.005	0.2575	0.4725	0.73	0.9975	0.01	0.1725	0.4375	0.745	0.9925	0.0025	0.3025	0.54	0.7625	1	0.34	0.1	0.56	0.0401	0.105263	0.005013	0.0025	0.2175	0.3875	0.7175	1	0.055	0.1725	0.2025	0.2875	0.36	0.0175	0.41	0.6175	0.7825	0.9925	0.5375	0.441103	0.0125	0.2475	0.4425	0.6925	0.995	0.2925
0.369892	0.331183	0.298925	0.243534	0.226293	0.193966	0.008602	0.230108	0.492473	0.8	0.993548	0.006452	0.268817	0.505376	0.731183	1	0.002151	0.232258	0.47957	0.703226	0.948387	0.384946	0.083871	0.531183	0.036638	0.105603	0.002155	0.002151	0.221505	0.391398	0.780645	1	0.064516	0.176344	0.251613	0.313978	0.417204	0.006452	0.402151	0.591398	0.76129	0.948387	0.541935	0.362069	0.004301	0.260215	0.47957	0.703226	0.948387	0.344086
0.416	0.3072	0.2768	0.25641	0.221154	0.189103	0.0048	0.2	0.4304	0.6704	0.9984	0.0032	0.2768	0.6032	0.8192	0.9968	0.0016	0.3152	0.5264	0.7376	1	0.5104	0.1616	0.328	0.070513	0.048077	0	0.0016	0.1936	0.4048	0.7904	1	0.0912	0.2816	0.7872	0.8784	0.992	0.0144	0.3472	0.4976	0.5792	0.7088	0.4192	0.394231	0.0096	0.3424	0.5968	0.8096	0.9968	0.3648
0.401575	0.23622	0.362205	0.198413	0.373016	0.142857	0.047244	0.267717	0.551181	0.748031	0.968504	0.015748	0.125984	0.519685	0.811024	1	0.007874	0.212598	0.425197	0.677165	0.976378	0.464567	0.496063	0.03937	0.15873	0.031746	0	0.007874	0.346457	0.614173	0.818898	1	0.015748	0.165354	0.362205	0.590551	0.905512	0.850394	0.850394	0.858268	0.866142	0.968504	0.354331	0.460317	0.015748	0.19685	0.409449	0.606299	0.976378	0.23622
0.398496	0.263158	0.338346	0.234848	0.25	0.19697	0.015038	0.300752	0.601504	0.774436	0.992481	0.022556	0.18797	0.421053	0.684211	1	0.007519	0.218045	0.443609	0.654135	0.977444	0.398496	0.330827	0.270677	0.075758	0.060606	0	0.007519	0.180451	0.518797	0.669173	1	0.12782	0.225564	0.345865	0.466165	0.56391	0.06015	0.736842	0.804511	0.87218	0.984962	0.466165	0.318182	0.030075	0.225564	0.353383	0.548872	0.977444	0.285714
0.460526	0.305921	0.233553	0.254125	0.207921	0.132013	0.016447	0.266447	0.460526	0.667763	0.993421	0.006579	0.223684	0.542763	0.776316	1	0.003289	0.203947	0.575658	0.773026	0.967105	0.361842	0.072368	0.565789	0.019802	0.079208	0.006601	0.003289	0.282895	0.5625	0.815789	1	0.565789	0.578947	0.684211	0.723684	0.8125	0.016447	0.217105	0.421053	0.667763	0.976974	0.378289	0.389439	0.023026	0.236842	0.625	0.759868	0.967105	0.315789
0.383117	0.266234	0.350649	0.183007	0.294118	0.183007	0.012987	0.272727	0.441558	0.714286	1	0.084416	0.233766	0.571429	0.785714	0.967532	0.006494	0.194805	0.487013	0.720779	0.961039	0.37013	0.311688	0.318182	0.130719	0.039216	0.013072	0.006494	0.142857	0.551948	0.766234	1	0.012987	0.24026	0.603896	0.863636	0.961039	0.162338	0.311688	0.38961	0.467532	0.798701	0.38961	0.48366	0.019481	0.201299	0.519481	0.720779	0.954545	0.25974
0.350365	0.321168	0.328467	0.169118	0.220588	0.242647	0.080292	0.328467	0.532847	0.773723	1	0.014599	0.189781	0.372263	0.729927	0.970803	0.007299	0.240876	0.481752	0.737226	0.978102	0.328467	0.153285	0.518248	0.051471	0.080882	0.007353	0.007299	0.189781	0.343066	0.773723	1	0.218978	0.262774	0.29927	0.386861	0.708029	0.080292	0.474453	0.605839	0.810219	0.978102	0.467153	0.426471	0.051095	0.284672	0.481752	0.729927	0.978102	0.291971
0.337237	0.466042	0.196721	0.309859	0.126761	0.171362	0.018735	0.274005	0.559719	0.796253	0.997658	0.004684	0.220141	0.428571	0.70726	1	0.002342	0.278689	0.526932	0.765808	0.98829	0.702576	0.105386	0.192037	0.039906	0.058685	0.007042	0.002342	0.210773	0.42623	0.70726	1	0.023419	0.283372	0.613583	0.737705	0.786885	0.098361	0.491803	0.576112	0.814988	0.971897	0.334895	0.29108	0.023419	0.241218	0.487119	0.711944	0.98829	0.477752
0.35468	0.347291	0.29803	0.254321	0.195062	0.204938	0.017241	0.256158	0.504926	0.76601	0.995074	0.009852	0.253695	0.502463	0.729064	0.997537	0.002463	0.199507	0.490148	0.736453	1	0.352217	0.150246	0.497537	0.064198	0.083951	0.004938	0.002463	0.229064	0.554187	0.807882	1	0.046798	0.189655	0.546798	0.935961	0.992611	0.014778	0.263547	0.445813	0.689655	0.891626	0.591133	0.380247	0.004926	0.253695	0.475369	0.699507	0.987685	0.366995
0.36036	0.301802	0.337838	0.21267	0.271493	0.20362	0.027027	0.220721	0.481982	0.77027	1	0.009009	0.256757	0.423423	0.653153	0.986486	0.004505	0.22973	0.531532	0.747748	0.995495	0.346847	0.247748	0.405405	0.085973	0.085973	0.004525	0.004505	0.189189	0.391892	0.720721	1	0.130631	0.238739	0.5	0.752252	0.963964	0.018018	0.328829	0.518018	0.675676	0.990991	0.441441	0.479638	0.022523	0.297297	0.536036	0.756757	0.986486	0.310811
0.34507	0.302817	0.352113	0.241135	0.22695	0.212766	0.035211	0.21831	0.464789	0.647887	0.957746	0.014085	0.267606	0.577465	0.823944	0.985915	0.007042	0.197183	0.450704	0.732394	1	0.380282	0.352113	0.267606	0.163121	0.049645	0.007092	0.007042	0.316901	0.556338	0.732394	1	0.169014	0.422535	0.577465	0.816901	0.992958	0.042254	0.098592	0.232394	0.295775	0.922535	0.478873	0.347518	0.035211	0.253521	0.612676	0.809859	1	0.316901
0.295082	0.352459	0.352459	0.194521	0.227397	0.243836	0.016393	0.20765	0.540984	0.756831	0.997268	0.005464	0.26776	0.453552	0.674863	0.991803	0.002732	0.251366	0.513661	0.762295	1	0.404372	0.128415	0.467213	0.063014	0.079452	0.00274	0.002732	0.270492	0.494536	0.655738	1	0.010929	0.068306	0.513661	0.931694	0.986339	0.092896	0.245902	0.483607	0.743169	0.893443	0.63388	0.334247	0.010929	0.26776	0.491803	0.724044	0.991803	0.42623
0.389423	0.331731	0.278846	0.193237	0.231884	0.188406	0.009615	0.216346	0.403846	0.697115	0.995192	0.024038	0.192308	0.538462	0.788462	1	0.004808	0.3125	0.509615	0.735577	0.990385	0.490385	0.158654	0.350962	0.067633	0.10628	0.028986	0.004808	0.153846	0.524038	0.75	1	0.221154	0.293269	0.615385	0.740385	0.980769	0.043269	0.326923	0.427885	0.725962	0.947115	0.485577	0.415459	0.024038	0.341346	0.504808	0.730769	0.980769	0.307692
0.299363	0.464968	0.235669	0.288462	0.185897	0.217949	0.012739	0.133758	0.382166	0.636943	0.961783	0.050955	0.273885	0.528662	0.808917	1	0.006369	0.363057	0.55414	0.719745	0.942675	0.630573	0.165605	0.203822	0.051282	0.064103	0.012821	0.006369	0.165605	0.324841	0.579618	1	0.11465	0.503185	0.757962	0.796178	0.942675	0.019108	0.535032	0.636943	0.859873	0.980892	0.394904	0.397436	0.019108	0.261146	0.484076	0.713376	0.942675	0.471338
0.298137	0.39929	0.302573	0.218472	0.175844	0.251332	0.002662	0.24756	0.515528	0.738243	0.997338	0.001775	0.273292	0.516415	0.755989	1	0.000887	0.222715	0.463177	0.753327	0.992014	0.470275	0.171251	0.358474	0.087922	0.07016	0.002664	0.000887	0.193434	0.488909	0.740018	1	0.007986	0.200532	0.416149	0.748891	0.994676	0.04614	0.345164	0.571429	0.781721	0.968944	0.512866	0.40675	0.003549	0.262644	0.512866	0.762201	0.992014	0.404614
0.41	0.25	0.34	0.151515	0.252525	0.161616	0.06	0.31	0.53	0.77	0.98	0.03	0.17	0.4	0.56	1	0.01	0.22	0.49	0.72	0.99	0.47	0.53	0	0.181818	0	0	0.01	0.3	0.53	0.8	1	0.02	0.19	0.38	0.69	0.97	0	0	0	0	0	0.36	0.484848	0.02	0.2	0.45	0.71	0.96	0.26
0.307971	0.362319	0.32971	0.210909	0.221818	0.210909	0.021739	0.26087	0.518116	0.768116	1	0.007246	0.221014	0.42029	0.721014	0.996377	0.003623	0.289855	0.51087	0.742754	0.98913	0.460145	0.257246	0.282609	0.087273	0.058182	0	0.003623	0.242754	0.423913	0.677536	1	0.123188	0.221014	0.5	0.721014	0.858696	0.007246	0.380435	0.561594	0.913043	0.985507	0.550725	0.356364	0.014493	0.304348	0.528986	0.742754	0.98913	0.427536
0.319328	0.411765	0.268908	0.288136	0.20339	0.144068	0.016807	0.168067	0.529412	0.739496	0.983193	0.02521	0.252101	0.495798	0.747899	1	0.008403	0.235294	0.420168	0.722689	0.966387	0.445378	0.168067	0.386555	0.076271	0.059322	0.008475	0.008403	0.268908	0.394958	0.865546	1	0.210084	0.285714	0.436975	0.478992	0.966387	0.02521	0.109244	0.579832	0.672269	0.957983	0.512605	0.440678	0.02521	0.252101	0.453782	0.731092	0.966387	0.378151
0.321918	0.424658	0.253425	0.282759	0.165517	0.255172	0.020548	0.191781	0.506849	0.753425	1	0.013699	0.267123	0.493151	0.746575	0.965753	0.006849	0.253425	0.417808	0.657534	0.945205	0.527397	0.287671	0.184932	0.096552	0.027586	0	0.006849	0.130137	0.452055	0.746575	1	0.150685	0.253425	0.349315	0.684932	0.883562	0.527397	0.561644	0.609589	0.767123	0.815068	0.445205	0.344828	0.034247	0.328767	0.520548	0.719178	0.945205	0.431507
0.467391	0.293478	0.23913	0.21978	0.21978	0.142857	0.021739	0.130435	0.380435	0.641304	0.98913	0.086957	0.423913	0.663043	0.804348	1	0.01087	0.282609	0.456522	0.652174	0.913043	0.663043	0.043478	0.293478	0.043956	0.043956	0	0.01087	0.163043	0.326087	0.619565	1	0.391304	0.391304	0.402174	0.413043	0.597826	0.456522	0.51087	0.75	0.826087	0.902174	0.347826	0.373626	0.293478	0.456522	0.652174	0.847826	0.945652	0.315217
0.328358	0.331157	0.340485	0.208217	0.221289	0.232493	0.009328	0.263993	0.500933	0.727612	0.996269	0.001866	0.246269	0.512127	0.794776	0.999067	0.000933	0.231343	0.477612	0.741604	1	0.420709	0.172575	0.406716	0.062558	0.070028	0.002801	0.000933	0.260261	0.525187	0.775187	1	0.031716	0.250933	0.472948	0.817164	0.990672	0.002799	0.235075	0.5	0.719216	0.981343	0.597948	0.3324	0.002799	0.227612	0.488806	0.724813	0.997201	0.347948
0.287958	0.413613	0.298429	0.259843	0.152231	0.259843	0.005236	0.232984	0.536649	0.759162	1	0.013089	0.282723	0.54712	0.777487	0.997382	0.002618	0.21466	0.410995	0.657068	0.968586	0.568063	0.23822	0.193717	0.08399	0.041995	0.005249	0.002618	0.21466	0.505236	0.790576	1	0.096859	0.240838	0.510471	0.732984	0.939791	0.036649	0.287958	0.408377	0.596859	0.903141	0.573298	0.383202	0.007853	0.246073	0.468586	0.717277	0.994764	0.413613
0.37234	0.303191	0.324468	0.256684	0.256684	0.144385	0.037234	0.297872	0.585106	0.845745	0.994681	0.010638	0.154255	0.351064	0.648936	1	0.005319	0.223404	0.5	0.68617	0.973404	0.287234	0.015957	0.696809	0	0.117647	0.010695	0.005319	0.106383	0.340426	0.68617	1	0.382979	0.382979	0.382979	0.388298	0.393617	0.031915	0.308511	0.558511	0.787234	0.978723	0.5	0.417112	0.021277	0.202128	0.446809	0.675532	0.920213	0.335106
0.301887	0.399371	0.298742	0.214511	0.195584	0.208202	0.006289	0.232704	0.446541	0.720126	0.974843	0.022013	0.292453	0.477987	0.713836	0.996855	0.003145	0.226415	0.544025	0.801887	1	0.584906	0.160377	0.254717	0.041009	0.072555	0.022082	0.003145	0.185535	0.36478	0.647799	1	0.012579	0.628931	0.836478	0.896226	0.962264	0.034591	0.386792	0.518868	0.691824	0.990566	0.515723	0.321767	0.009434	0.22327	0.600629	0.801887	0.990566	0.418239
0.154079	0.36858	0.477341	0.09697	0.139394	0.375758	0.012085	0.265861	0.543807	0.864048	0.993958	0.006042	0.23565	0.504532	0.73716	0.996979	0.003021	0.232628	0.477341	0.706949	1	0.299094	0.090634	0.610272	0.042424	0.084848	0.018182	0.003021	0.226586	0.528701	0.800604	1	0.024169	0.042296	0.398792	0.824773	0.848943	0.063444	0.256798	0.47432	0.70997	0.987915	0.725076	0.212121	0.015106	0.256798	0.462236	0.688822	0.984894	0.359517
0.230769	0.32967	0.43956	0.176796	0.154696	0.265193	0.016484	0.21978	0.604396	0.82967	0.994505	0.010989	0.247253	0.521978	0.791209	0.989011	0.005495	0.241758	0.472527	0.692308	1	0.335165	0.049451	0.615385	0.022099	0.044199	0.01105	0.005495	0.082418	0.637363	0.873626	1	0.340659	0.346154	0.895604	0.961538	0.978022	0.098901	0.274725	0.43956	0.593407	0.802198	0.659341	0.276243	0.021978	0.247253	0.456044	0.692308	0.983516	0.313187
0.2	0.414815	0.385185	0.176252	0.111317	0.313544	0.024074	0.255556	0.47037	0.707407	1	0.003704	0.212963	0.472222	0.725926	0.996296	0.001852	0.277778	0.553704	0.77037	0.975926	0.309259	0.027778	0.662963	0.011132	0.081633	0.003711	0.001852	0.133333	0.512963	0.848148	1	0.053704	0.057407	0.57037	0.577778	0.774074	0.05	0.277778	0.488889	0.701852	0.981481	0.701852	0.148423	0.003704	0.251852	0.462963	0.724074	0.972222	0.414815
0.366071	0.241071	0.392857	0.117117	0.297297	0.207207	0.026786	0.178571	0.526786	0.669643	0.982143	0.017857	0.339286	0.517857	0.830357	0.946429	0.008929	0.232143	0.4375	0.714286	1	0.330357	0.294643	0.375	0.081081	0.045045	0.045045	0.008929	0.276786	0.517857	0.883929	1	0.026786	0.089286	0.196429	0.3125	0.9375	0.392857	0.491071	0.616071	0.705357	0.928571	0.553571	0.396396	0.035714	0.303571	0.473214	0.714286	0.973214	0.223214
0.269877	0.478163	0.25196	0.245516	0.117713	0.247758	0.005599	0.238522	0.426652	0.683091	0.986562	0.003359	0.237402	0.494961	0.761478	0.996641	0.00112	0.294513	0.581187	0.743561	1	0.666293	0.078387	0.255319	0.042601	0.069507	0.004484	0.00112	0.207167	0.412094	0.7514	1	0.066069	0.262038	0.56327	0.870101	0.99888	0.004479	0.522956	0.641657	0.731243	0.947368	0.418813	0.338565	0.007839	0.349384	0.620381	0.778275	0.995521	0.520717
0.189084	0.352827	0.45809	0.136719	0.140625	0.34375	0.003899	0.325536	0.526316	0.719298	0.986355	0.007797	0.28655	0.522417	0.781676	0.998051	0.001949	0.212476	0.477583	0.732943	1	0.191033	0.011696	0.797271	0.001953	0.068359	0.001953	0.001949	0.333333	0.475634	0.789474	1	0.793372	0.793372	0.797271	0.79922	0.803119	0.009747	0.239766	0.497076	0.727096	0.986355	0.74269	0.253906	0.009747	0.237817	0.469786	0.756335	0.994152	0.346979
0.361204	0.298774	0.340022	0.190848	0.246652	0.214286	0.004459	0.240803	0.527313	0.772575	0.998885	0.00223	0.234114	0.440357	0.666667	1	0.001115	0.268673	0.522854	0.777035	0.996656	0.406912	0.162765	0.430323	0.085938	0.074777	0.00558	0.001115	0.249721	0.412486	0.662207	1	0.056856	0.239688	0.437012	0.615385	0.972129	0.006689	0.221851	0.628763	0.794872	0.995541	0.600892	0.354911	0.005574	0.265329	0.507246	0.726867	0.995541	0.302118
0.294118	0.425606	0.280277	0.284722	0.166667	0.243056	0.00692	0.266436	0.474048	0.705882	0.99308	0.010381	0.224913	0.49827	0.764706	0.975779	0.00346	0.235294	0.484429	0.750865	1	0.377163	0.477509	0.145329	0.097222	0.034722	0	0.00346	0.231834	0.442907	0.743945	1	0.183391	0.397924	0.560554	0.792388	0.982699	0.013841	0.044983	0.083045	0.148789	0.733564	0.508651	0.489583	0.013841	0.235294	0.467128	0.747405	1	0.377163
0.367021	0.265957	0.367021	0.165775	0.245989	0.187166	0.069149	0.297872	0.547872	0.776596	1	0.031915	0.159574	0.420213	0.659574	0.989362	0.005319	0.218085	0.473404	0.728723	0.984043	0.335106	0.12766	0.537234	0.048128	0.080214	0.005348	0.005319	0.223404	0.404255	0.696809	1	0.010638	0.143617	0.388298	0.478723	0.734043	0.069149	0.31383	0.611702	0.81383	0.957447	0.542553	0.417112	0.010638	0.170213	0.457447	0.664894	0.984043	0.303191
0.388889	0.262626	0.348485	0.192893	0.299492	0.203046	0.030303	0.191919	0.510101	0.823232	1	0.020202	0.252525	0.469697	0.656566	0.924242	0.005051	0.277778	0.494949	0.712121	0.984848	0.338384	0.242424	0.419192	0.091371	0.050761	0	0.005051	0.222222	0.383838	0.641414	1	0.232323	0.363636	0.535354	0.722222	0.818182	0.030303	0.161616	0.580808	0.883838	0.989899	0.565657	0.385787	0.010101	0.262626	0.505051	0.722222	0.984848	0.262626
0.271555	0.436745	0.2917	0.241129	0.160484	0.260484	0.006446	0.284448	0.509267	0.752619	0.996777	0.001612	0.252216	0.51249	0.761483	0.998388	0.000806	0.214343	0.45689	0.710717	1	0.521354	0.448832	0.029815	0.143548	0.009677	0	0.000806	0.272361	0.54311	0.825947	1	0.006446	0.215149	0.425463	0.645447	0.995971	0.868654	0.875101	0.882353	0.933118	0.983884	0.396454	0.470968	0.005641	0.273973	0.545528	0.79855	0.995971	0.452861
0.313953	0.363372	0.322674	0.198251	0.206997	0.244898	0.005814	0.264535	0.517442	0.831395	1	0.014535	0.212209	0.465116	0.665698	0.997093	0.002907	0.25	0.523256	0.758721	0.982558	0.331395	0.125	0.543605	0.052478	0.099125	0	0.002907	0.203488	0.447674	0.726744	1	0.008721	0.090116	0.290698	0.436047	0.956395	0.031977	0.331395	0.578488	0.793605	0.991279	0.671512	0.367347	0.011628	0.284884	0.514535	0.706395	0.982558	0.383721
0.29078	0.390071	0.319149	0.207143	0.25	0.257143	0.014184	0.177305	0.524823	0.758865	0.964539	0.035461	0.248227	0.432624	0.680851	1	0.007092	0.297872	0.503546	0.787234	0.992908	0.432624	0.297872	0.269504	0.078571	0.035714	0.007143	0.007092	0.219858	0.553191	0.730496	1	0.035461	0.134752	0.531915	0.695035	0.992908	0.29078	0.347518	0.41844	0.751773	0.822695	0.489362	0.485714	0.035461	0.283688	0.404255	0.659574	0.985816	0.404255
0.299363	0.401274	0.299363	0.282051	0.153846	0.224359	0.025478	0.312102	0.630573	0.828025	0.993631	0.012739	0.248408	0.477707	0.707006	1	0.006369	0.127389	0.363057	0.66242	0.974522	0.503185	0.242038	0.254777	0.096154	0.083333	0.00641	0.006369	0.242038	0.687898	0.853503	1	0.025478	0.261146	0.573248	0.66879	0.974522	0.044586	0.133758	0.356688	0.490446	0.643312	0.496815	0.384615	0.012739	0.184713	0.433121	0.649682	0.974522	0.382166
0.370166	0.309392	0.320442	0.205556	0.233333	0.205556	0.044199	0.226519	0.502762	0.78453	1	0.01105	0.276243	0.497238	0.734807	0.983425	0.005525	0.243094	0.486188	0.707182	0.972376	0.209945	0.132597	0.657459	0.05	0.094444	0.005556	0.005525	0.276243	0.574586	0.745856	1	0.59116	0.618785	0.78453	0.845304	0.889503	0.016575	0.187845	0.414365	0.674033	0.983425	0.464088	0.466667	0.033149	0.259669	0.491713	0.762431	0.972376	0.325967
0.323607	0.342175	0.334218	0.194149	0.207447	0.268617	0.005305	0.225464	0.429708	0.671088	1	0.01061	0.217507	0.519894	0.801061	0.994695	0.002653	0.28382	0.522546	0.761273	0.992042	0.355438	0.082228	0.562334	0.031915	0.101064	0	0.002653	0.092838	0.440318	0.753316	1	0.045093	0.196286	0.217507	0.496021	0.785146	0.103448	0.35809	0.559682	0.742706	0.984085	0.514589	0.398936	0.03183	0.30504	0.533156	0.785146	0.98939	0.374005
0.283843	0.515284	0.200873	0.276316	0.109649	0.232456	0.039301	0.196507	0.384279	0.611354	0.899563	0.0131	0.28821	0.537118	0.803493	0.991266	0.004367	0.257642	0.563319	0.816594	1	0.323144	0.021834	0.655022	0.008772	0.114035	0	0.004367	0.100437	0.336245	0.689956	1	0.008734	0.008734	0.0131	0.017467	0.026201	0.131004	0.353712	0.567686	0.755459	0.9869	0.541485	0.403509	0.0131	0.362445	0.646288	0.838428	0.9869	0.484716
0.287234	0.37234	0.340426	0.236559	0.107527	0.225806	0.031915	0.170213	0.308511	0.510638	0.957447	0.021277	0.191489	0.446809	0.808511	1	0.010638	0.43617	0.702128	0.787234	0.989362	0.361702	0.010638	0.62766	0.021505	0.086022	0	0.010638	0.095745	0.234043	0.319149	1	0.053191	0.053191	0.053191	0.053191	0.053191	0.148936	0.457447	0.659574	0.819149	0.978723	0.468085	0.344086	0.042553	0.393617	0.574468	0.829787	0.989362	0.382979
0.290631	0.432122	0.277247	0.227969	0.132184	0.206897	0.007648	0.512428	0.699809	0.864245	0.998088	0.003824	0.214149	0.42065	0.684512	1	0.001912	0.210325	0.395793	0.58891	0.984704	0.512428	0.032505	0.455067	0.01341	0.047893	0.001916	0.001912	0.193117	0.544933	0.692161	1	0.107075	0.437859	0.445507	0.453155	0.619503	0.095602	0.304015	0.491396	0.862333	0.996176	0.521989	0.291188	0.011472	0.183556	0.332696	0.562141	0.99044	0.41109
0.351351	0.345946	0.302703	0.233696	0.25	0.201087	0.037838	0.232432	0.497297	0.832432	1	0.016216	0.227027	0.459459	0.691892	0.994595	0.005405	0.27027	0.52973	0.751351	0.972973	0.545946	0.135135	0.318919	0.076087	0.076087	0	0.005405	0.151351	0.421622	0.654054	1	0.286486	0.351351	0.432432	0.464865	0.621622	0.021622	0.227027	0.762162	0.902703	0.989189	0.443243	0.380435	0.010811	0.351351	0.52973	0.735135	0.989189	0.394595
0.277978	0.379061	0.34296	0.199275	0.213768	0.246377	0.021661	0.227437	0.480144	0.693141	0.974729	0.00722	0.259928	0.537906	0.761733	1	0.00361	0.241877	0.487365	0.768953	0.99278	0.429603	0.202166	0.368231	0.07971	0.094203	0.007246	0.00361	0.176895	0.425993	0.68231	1	0.086643	0.144404	0.288809	0.779783	0.99278	0.227437	0.418773	0.577617	0.740072	0.949458	0.570397	0.376812	0.01444	0.263538	0.516245	0.747292	0.99278	0.382671
0.327696	0.397463	0.274841	0.262712	0.186441	0.226695	0.008457	0.241015	0.454545	0.763214	0.995772	0.004228	0.243129	0.526427	0.744186	1	0.002114	0.247357	0.498943	0.735729	0.991543	0.48203	0.141649	0.376321	0.063559	0.067797	0.016949	0.002114	0.139535	0.53277	0.803383	1	0.008457	0.689218	0.733615	0.854123	0.985201	0.109937	0.251586	0.395349	0.54334	0.983087	0.443975	0.381356	0.006342	0.262156	0.566596	0.718816	0.991543	0.401691
0.185841	0.383481	0.430678	0.168639	0.121302	0.328402	0.0059	0.300885	0.536873	0.722714	0.99705	0.017699	0.230088	0.463127	0.766962	0.9941	0.00295	0.233038	0.474926	0.740413	1	0.300885	0.050147	0.648968	0.017751	0.053254	0.005917	0.00295	0.174041	0.516224	0.870206	1	0.374631	0.383481	0.489676	0.501475	0.828909	0.073746	0.241888	0.466077	0.722714	0.926254	0.716814	0.177515	0.00885	0.244838	0.454277	0.722714	0.946903	0.351032
0.321429	0.339286	0.339286	0.243243	0.144144	0.261261	0.0625	0.455357	0.633929	0.776786	1	0.026786	0.258929	0.428571	0.767857	0.928571	0.008929	0.125	0.294643	0.678571	0.982143	0.258929	0.026786	0.714286	0.018018	0.072072	0.018018	0.008929	0.294643	0.357143	0.473214	1	0.401786	0.401786	0.401786	0.410714	0.491071	0.026786	0.196429	0.625	0.803571	0.982143	0.571429	0.468468	0.035714	0.1875	0.366071	0.732143	0.982143	0.357143
0.143939	0.340909	0.515152	0.10687	0.114504	0.366412	0.022727	0.098485	0.636364	0.924242	1	0.015152	0.227273	0.477273	0.75	0.984848	0.007576	0.242424	0.454545	0.704545	0.94697	0.189394	0	0.810606	0	0.061069	0	0.007576	0.272727	0.424242	0.94697	1	0	0	0	0	0	0.015152	0.204545	0.492424	0.704545	0.909091	0.689394	0.305344	0.030303	0.219697	0.44697	0.666667	0.893939	0.310606
0.165179	0.375	0.459821	0.121076	0.139013	0.358744	0.013393	0.375	0.540179	0.75	0.991071	0.008929	0.236607	0.526786	0.758929	1	0.004464	0.205357	0.433036	0.727679	0.977679	0.133929	0	0.866071	0	0.071749	0	0.004464	0.214286	0.40625	0.558036	1	0	0	0	0	0	0.026786	0.25	0.517857	0.767857	0.991071	0.754464	0.251121	0.017857	0.28125	0.513393	0.732143	0.977679	0.357143
0.253807	0.406091	0.340102	0.19898	0.163265	0.311224	0.010152	0.269036	0.573604	0.852792	1	0.030457	0.248731	0.456853	0.725888	0.979695	0.005076	0.177665	0.477157	0.71066	0.974619	0.385787	0.126904	0.48731	0.05102	0.112245	0	0.005076	0.345178	0.583756	0.786802	1	0.015228	0.152284	0.406091	0.593909	0.736041	0.050761	0.22335	0.507614	0.705584	0.959391	0.690355	0.367347	0.015228	0.248731	0.492386	0.71066	0.974619	0.406091
0.381418	0.332518	0.286064	0.215686	0.215686	0.169118	0.00978	0.266504	0.471883	0.755501	0.997555	0.02445	0.254279	0.533007	0.669927	1	0.002445	0.222494	0.481663	0.770171	0.992665	0.415648	0.051345	0.533007	0.026961	0.110294	0.017157	0.002445	0.254279	0.569682	0.716381	1	0.036675	0.217604	0.261614	0.877751	0.943765	0.00978	0.200489	0.481663	0.755501	0.992665	0.484108	0.455882	0.01956	0.305623	0.537897	0.794621	0.992665	0.391198
0.361345	0.277311	0.361345	0.135593	0.237288	0.271186	0.02521	0.176471	0.470588	0.798319	0.991597	0.042017	0.243697	0.428571	0.663866	0.89916	0.008403	0.252101	0.495798	0.747899	1	0.411765	0.134454	0.453782	0.050847	0.118644	0	0.008403	0.235294	0.521008	0.789916	1	0.117647	0.142857	0.294118	0.478992	0.512605	0.02521	0.361345	0.596639	0.764706	0.983193	0.478992	0.457627	0.042017	0.268908	0.470588	0.647059	0.94958	0.260504
0.445652	0.434783	0.119565	0.398907	0.103825	0.10929	0.01087	0.217391	0.440217	0.603261	0.983696	0.027174	0.25	0.548913	0.793478	1	0.005435	0.255435	0.690217	0.782609	0.945652	0.826087	0.038043	0.13587	0.010929	0.043716	0	0.005435	0.23913	0.543478	0.793478	1	0.663043	0.663043	0.673913	0.684783	0.695652	0.125	0.152174	0.282609	0.315217	0.581522	0.228261	0.229508	0.23913	0.608696	0.728261	0.858696	0.972826	0.38587
0.298969	0.396907	0.304124	0.238342	0.207254	0.274611	0.036082	0.283505	0.520619	0.798969	0.994845	0.015464	0.319588	0.572165	0.762887	1	0.005155	0.128866	0.340206	0.618557	0.958763	0.479381	0.221649	0.298969	0.067358	0.067358	0.025907	0.005155	0.252577	0.448454	0.664948	1	0.025773	0.103093	0.396907	0.520619	0.623711	0.159794	0.381443	0.793814	0.907216	0.989691	0.525773	0.331606	0.025773	0.21134	0.5	0.680412	0.979381	0.42268
0.286116	0.39212	0.321764	0.191549	0.184038	0.239437	0.006567	0.247655	0.5197	0.733583	0.998124	0.001876	0.233583	0.456848	0.747655	1	0.000938	0.266417	0.522514	0.758912	0.993433	0.594747	0.339587	0.065666	0.103286	0.024413	0	0.000938	0.228893	0.488743	0.755159	1	0.038462	0.265478	0.497186	0.690432	0.918386	0.010319	0.029081	0.879925	0.943715	0.974672	0.535647	0.287324	0.00469	0.213884	0.418386	0.688555	0.993433	0.398687
0.277419	0.406452	0.316129	0.221325	0.172859	0.277868	0.003226	0.254839	0.51129	0.76129	0.998387	0.004839	0.251613	0.506452	0.745161	1	0.001613	0.241935	0.475806	0.748387	0.990323	0.591935	0.291935	0.116129	0.100162	0.038772	0.009693	0.001613	0.267742	0.5	0.785484	1	0.085484	0.272581	0.48871	0.691935	0.991935	0.025806	0.054839	0.548387	0.814516	0.901613	0.616129	0.345719	0.008065	0.253226	0.508065	0.725806	0.991935	0.391935
0.269006	0.321637	0.409357	0.135294	0.188235	0.276471	0.017544	0.28655	0.555556	0.900585	1	0.011696	0.269006	0.450292	0.666667	0.988304	0.005848	0.192982	0.444444	0.71345	0.982456	0.245614	0.122807	0.631579	0.023529	0.070588	0	0.005848	0.210526	0.51462	0.766082	1	0.216374	0.239766	0.269006	0.695906	0.730994	0.02924	0.315789	0.502924	0.777778	0.947368	0.736842	0.082353	0.040936	0.263158	0.473684	0.695906	0.894737	0.315789
0.283407	0.50514	0.211454	0.285294	0.120588	0.185294	0.004405	0.267254	0.509545	0.71072	0.995595	0.002937	0.281938	0.54185	0.795888	0.997063	0.001468	0.176211	0.356828	0.712188	1	0.701909	0.049927	0.248164	0.032353	0.041176	0	0.001468	0.378855	0.575624	0.798825	1	0.173275	0.189427	0.371512	0.651982	0.84141	0.033774	0.113069	0.236417	0.393539	0.98091	0.399413	0.376471	0.008811	0.182085	0.38326	0.735683	0.985316	0.546256
0.346774	0.346774	0.306452	0.203252	0.252033	0.195122	0.032258	0.169355	0.387097	0.556452	0.943548	0.016129	0.233871	0.572581	0.798387	1	0.008065	0.25	0.596774	0.774194	0.983871	0.435484	0.241935	0.322581	0.073171	0.056911	0.00813	0.008065	0.370968	0.508065	0.733871	1	0.403226	0.629032	0.693548	0.798387	0.991935	0.032258	0.104839	0.25	0.330645	0.943548	0.459677	0.292683	0.056452	0.290323	0.637097	0.806452	0.975806	0.41129
0.389333	0.384	0.226667	0.275401	0.173797	0.144385	0.005333	0.205333	0.458667	0.794667	0.994667	0.008	0.229333	0.477333	0.674667	1	0.002667	0.344	0.658667	0.789333	0.992	0.466667	0.026667	0.506667	0.010695	0.080214	0	0.002667	0.216	0.485333	0.626667	1	0.752	0.754667	0.762667	0.781333	0.789333	0.013333	0.266667	0.450667	0.845333	0.992	0.453333	0.40107	0.018667	0.354667	0.557333	0.728	0.989333	0.376
0.254473	0.417495	0.328032	0.179283	0.179283	0.2749	0.003976	0.254473	0.497018	0.775348	0.994036	0.013917	0.252485	0.520875	0.735586	0.99006	0.001988	0.238569	0.479125	0.741551	1	0.518887	0.194831	0.286282	0.065737	0.053785	0.001992	0.001988	0.198807	0.536779	0.787276	1	0.033797	0.343936	0.445328	0.741551	0.912525	0.069583	0.250497	0.50497	0.717694	0.960239	0.592445	0.36255	0.023857	0.270378	0.50497	0.729622	0.996024	0.413519
0.4	0.258824	0.341176	0.202381	0.321429	0.130952	0.035294	0.270588	0.447059	0.682353	0.988235	0.023529	0.317647	0.670588	0.811765	0.929412	0.011765	0.176471	0.4	0.6	1	0.376471	0.105882	0.517647	0.035714	0.059524	0.035714	0.011765	0.635294	0.776471	0.870588	1	0.482353	0.494118	0.6	0.623529	0.905882	0.058824	0.176471	0.305882	0.470588	0.717647	0.388235	0.428571	0.058824	0.223529	0.517647	0.623529	0.941176	0.294118
0.282297	0.373206	0.344498	0.167866	0.167866	0.318945	0.014354	0.258373	0.507177	0.772727	0.992823	0.004785	0.232057	0.473684	0.69378	1	0.002392	0.260766	0.535885	0.758373	0.997608	0.45933	0.145933	0.394737	0.057554	0.071942	0.004796	0.002392	0.267943	0.4689	0.770335	1	0.052632	0.380383	0.535885	0.72488	0.997608	0.011962	0.198565	0.495215	0.748804	0.971292	0.57177	0.340528	0.011962	0.349282	0.559809	0.760766	0.997608	0.354067
0.465753	0.219178	0.315068	0.125	0.458333	0.083333	0.027397	0.178082	0.465753	0.643836	0.917808	0.260274	0.657534	0.849315	0.945205	1	0.013699	0.150685	0.342466	0.575342	0.835616	0.287671	0	0.712329	0	0.027778	0	0.013699	0.780822	0.849315	0.917808	1	0	0	0	0	0	0.054795	0.219178	0.39726	0.575342	0.753425	0.342466	0.444444	0.09589	0.273973	0.424658	0.589041	0.835616	0.219178
0.309237	0.373494	0.317269	0.254032	0.173387	0.25	0.008032	0.204819	0.457831	0.726908	0.995984	0.032129	0.285141	0.51004	0.722892	1	0.004016	0.196787	0.497992	0.7751	0.983936	0.413655	0.192771	0.393574	0.080645	0.072581	0	0.004016	0.297189	0.518072	0.742972	1	0.016064	0.196787	0.393574	0.686747	0.86747	0.036145	0.228916	0.546185	0.831325	0.97992	0.554217	0.33871	0.016064	0.293173	0.538153	0.751004	0.959839	0.381526
0.278422	0.331787	0.389791	0.169767	0.230233	0.276744	0.00464	0.234339	0.489559	0.761021	0.99536	0.011601	0.292343	0.538283	0.767981	0.979118	0.00232	0.218097	0.468677	0.726218	1	0.438515	0.257541	0.303944	0.095349	0.072093	0.002326	0.00232	0.294664	0.535963	0.777262	1	0.167053	0.310905	0.475638	0.698376	0.990719	0.009281	0.116009	0.387471	0.74478	0.962877	0.556845	0.409302	0.009281	0.257541	0.468677	0.698376	0.990719	0.357309
0.339547	0.415446	0.245007	0.277333	0.161333	0.194667	0.005326	0.286285	0.509987	0.713715	1	0.002663	0.242344	0.455393	0.736352	0.997337	0.001332	0.217044	0.54727	0.82024	0.998668	0.6498	0.165113	0.185087	0.069333	0.064	0.005333	0.001332	0.267643	0.467377	0.729694	1	0.003995	0.193076	0.715047	0.900133	0.997337	0.026631	0.250333	0.539281	0.669774	0.842876	0.436751	0.344	0.010652	0.234354	0.619174	0.834887	0.998668	0.438083
0.220365	0.369301	0.410334	0.167428	0.149163	0.324201	0.00304	0.196049	0.489362	0.756839	0.993921	0.006079	0.287234	0.527356	0.784195	1	0.00152	0.25076	0.449848	0.717325	0.99848	0.276596	0.033435	0.68997	0.021309	0.070015	0.012177	0.00152	0.092705	0.580547	0.844985	1	0.015198	0.37234	0.484802	0.899696	0.99696	0.004559	0.261398	0.490881	0.714286	0.984802	0.68997	0.258752	0.010638	0.31459	0.527356	0.744681	0.99848	0.387538
0.317956	0.360539	0.321505	0.208097	0.224432	0.237926	0.002839	0.259759	0.530163	0.777147	1	0.001419	0.254791	0.508162	0.788502	0.995032	0.00071	0.238467	0.465578	0.687012	0.995742	0.303052	0.037615	0.659333	0.012784	0.076705	0.009943	0.00071	0.328602	0.64159	0.902768	1	0.017033	0.400284	0.76934	0.915543	0.995032	0.002129	0.212207	0.452094	0.670688	0.997161	0.527324	0.375	0.003549	0.242725	0.459191	0.680625	0.994322	0.364798
0.38828	0.283133	0.328587	0.205479	0.219726	0.187397	0.002191	0.293538	0.540526	0.778204	0.998905	0.002738	0.216867	0.455093	0.702629	1	0.000548	0.220153	0.481928	0.751369	0.999452	0.428806	0.129792	0.441402	0.056986	0.087671	0.009863	0.000548	0.264513	0.536692	0.780394	1	0.012048	0.213034	0.507119	0.782585	0.996166	0.001643	0.232202	0.458379	0.668127	0.988499	0.542716	0.300274	0.001643	0.212486	0.464403	0.759584	0.998357	0.263965
0.247475	0.277778	0.474747	0.101523	0.228426	0.304569	0.035354	0.292929	0.39899	0.510101	1	0.015152	0.191919	0.611111	0.818182	0.989899	0.005051	0.20202	0.525253	0.752525	0.994949	0.181818	0.045455	0.772727	0.020305	0.071066	0.010152	0.005051	0.510101	0.671717	0.828283	1	0.636364	0.641414	0.651515	0.69697	0.787879	0.015152	0.212121	0.419192	0.727273	0.984848	0.681818	0.304569	0.010101	0.237374	0.560606	0.762626	0.984848	0.242424
0.290196	0.42902	0.280784	0.262951	0.164835	0.239403	0.00549	0.293333	0.531765	0.793725	1	0.001569	0.231373	0.48549	0.728627	0.998431	0.000784	0.225882	0.463529	0.727059	0.996078	0.435294	0.105098	0.459608	0.043956	0.089482	0	0.000784	0.237647	0.45098	0.694902	1	0.002353	0.191373	0.317647	0.550588	0.894902	0.027451	0.294118	0.577255	0.8	0.996863	0.619608	0.357928	0.002353	0.242353	0.476863	0.752157	0.996863	0.457255
0.246094	0.519531	0.234375	0.211765	0.14902	0.25098	0.019531	0.253906	0.507812	0.761719	0.964844	0.015625	0.300781	0.539062	0.734375	0.996094	0.003906	0.128906	0.363281	0.636719	1	0.683594	0.023438	0.292969	0.015686	0.094118	0	0.003906	0.292969	0.507812	0.75	1	0.164062	0.164062	0.171875	0.175781	0.957031	0.007812	0.074219	0.390625	0.742188	0.902344	0.40625	0.392157	0.011719	0.179688	0.398438	0.75	0.980469	0.515625
0.304569	0.385787	0.309645	0.260204	0.178571	0.244898	0.020305	0.375635	0.604061	0.812183	0.984772	0.010152	0.208122	0.426396	0.670051	1	0.005076	0.238579	0.456853	0.705584	0.989848	0.28934	0.106599	0.604061	0.040816	0.112245	0.010204	0.005076	0.208122	0.380711	0.725888	1	0.010152	0.030457	0.538071	0.629442	0.86802	0.076142	0.274112	0.482234	0.781726	0.969543	0.527919	0.408163	0.010152	0.167513	0.456853	0.659898	0.964467	0.451777
0.172727	0.359091	0.468182	0.155251	0.100457	0.296804	0.009091	0.181818	0.509091	0.713636	0.995455	0.022727	0.290909	0.490909	0.668182	1	0.004545	0.213636	0.481818	0.759091	0.963636	0.213636	0.031818	0.754545	0.009132	0.100457	0	0.004545	0.286364	0.463636	0.622727	1	0.568182	0.568182	0.577273	0.586364	0.595455	0.009091	0.231818	0.504545	0.781818	0.981818	0.8	0.182648	0.013636	0.231818	0.5	0.736364	0.963636	0.318182
0.350877	0.321053	0.32807	0.212654	0.224956	0.212654	0.003509	0.25614	0.501754	0.721053	1	0.010526	0.273684	0.57193	0.814035	0.996491	0.001754	0.219298	0.442105	0.712281	0.985965	0.414035	0.098246	0.487719	0.042179	0.077329	0	0.001754	0.249123	0.485965	0.815789	1	0.040351	0.122807	0.305263	0.457895	0.935088	0.005263	0.287719	0.540351	0.684211	0.963158	0.503509	0.358524	0.005263	0.229825	0.424561	0.740351	0.989474	0.312281
0.338614	0.421782	0.239604	0.224206	0.178571	0.176587	0.015842	0.209901	0.493069	0.70495	1	0.00396	0.330693	0.647525	0.841584	0.994059	0.00198	0.174257	0.366337	0.542574	0.99604	0.623762	0.10297	0.273267	0.051587	0.075397	0.007937	0.00198	0.344554	0.623762	0.843564	1	0.017822	0.077228	0.112871	0.231683	0.685149	0.045545	0.283168	0.455446	0.60198	0.817822	0.457426	0.345238	0.017822	0.253465	0.413861	0.619802	0.99604	0.394059
0.370787	0.247191	0.382022	0.204545	0.25	0.193182	0.022472	0.325843	0.550562	0.719101	0.988764	0.089888	0.269663	0.52809	0.764045	1	0.011236	0.157303	0.359551	0.617978	0.955056	0.573034	0.089888	0.337079	0.034091	0.034091	0.011364	0.011236	0.449438	0.707865	0.853933	1	0.05618	0.067416	0.089888	0.573034	0.595506	0.101124	0.168539	0.258427	0.337079	0.685393	0.404494	0.431818	0.05618	0.179775	0.325843	0.617978	0.955056	0.325843
0.279743	0.379421	0.340836	0.196774	0.225806	0.293548	0.009646	0.247588	0.459807	0.765273	1	0.006431	0.215434	0.488746	0.713826	0.993569	0.003215	0.270096	0.530547	0.758842	0.983923	0.421222	0.212219	0.366559	0.122581	0.083871	0.006452	0.003215	0.170418	0.427653	0.684887	1	0.028939	0.176849	0.411576	0.623794	0.864952	0.106109	0.376206	0.59164	0.842444	0.990354	0.607717	0.419355	0.022508	0.247588	0.508039	0.768489	0.983923	0.414791
0.277934	0.464789	0.257277	0.259398	0.134398	0.246241	0.006573	0.271362	0.53615	0.785915	1	0.001878	0.273239	0.510798	0.762441	0.999061	0.000939	0.195305	0.437559	0.697653	0.994366	0.760563	0.043192	0.196244	0.031955	0.06015	0.003759	0.000939	0.290141	0.514554	0.756808	1	0.132394	0.197183	0.384977	0.784977	0.890141	0.003756	0.079812	0.440376	0.723005	0.988732	0.36338	0.357143	0.003756	0.201878	0.420657	0.694836	0.988732	0.470423
0.367816	0.307471	0.324713	0.233429	0.262248	0.170029	0.005747	0.204023	0.431034	0.735632	0.994253	0.020115	0.307471	0.560345	0.767241	0.997126	0.002874	0.270115	0.511494	0.741379	1	0.439655	0.152299	0.408046	0.057637	0.10951	0.005764	0.002874	0.183908	0.5	0.712644	1	0.063218	0.192529	0.241379	0.367816	0.566092	0.08908	0.41092	0.66954	0.818966	0.988506	0.566092	0.357349	0.011494	0.324713	0.528736	0.695402	0.985632	0.278736
0.322957	0.373541	0.303502	0.214425	0.20078	0.253411	0.003891	0.276265	0.540856	0.768482	1	0.005837	0.233463	0.457198	0.733463	0.992218	0.001946	0.237354	0.51751	0.745136	0.998054	0.484436	0.214008	0.301556	0.087719	0.064327	0.013645	0.001946	0.231518	0.490272	0.752918	1	0.013619	0.365759	0.754864	0.879377	0.998054	0.019455	0.250973	0.418288	0.587549	0.770428	0.618677	0.366472	0.005837	0.241245	0.457198	0.70428	0.998054	0.38716
0.251736	0.409722	0.338542	0.2	0.189565	0.285217	0.003472	0.270833	0.486111	0.734375	0.996528	0.008681	0.25	0.515625	0.763889	1	0.001736	0.230903	0.482639	0.739583	0.994792	0.456597	0.258681	0.284722	0.114783	0.073043	0.003478	0.001736	0.258681	0.546875	0.729167	1	0.039931	0.133681	0.592014	0.767361	0.996528	0.008681	0.277778	0.4375	0.732639	0.947917	0.642361	0.344348	0.005208	0.234375	0.475694	0.75	0.994792	0.447917
0.350993	0.317881	0.331126	0.226667	0.266667	0.193333	0.019868	0.218543	0.443709	0.735099	0.993377	0.013245	0.245033	0.476821	0.781457	1	0.006623	0.271523	0.543046	0.715232	0.97351	0.410596	0.251656	0.337748	0.053333	0.066667	0	0.006623	0.178808	0.423841	0.801325	1	0.072848	0.125828	0.364238	0.503311	0.569536	0.019868	0.615894	0.708609	0.874172	0.960265	0.549669	0.4	0.072848	0.284768	0.523179	0.708609	0.94702	0.344371
0.313808	0.430962	0.25523	0.260504	0.155462	0.176471	0.008368	0.330544	0.531381	0.723849	1	0.020921	0.225941	0.577406	0.849372	0.991632	0.004184	0.188285	0.380753	0.552301	0.933054	0.376569	0.09205	0.531381	0.033613	0.109244	0.008403	0.004184	0.25523	0.627615	0.891213	1	0.008368	0.025105	0.464435	0.539749	0.732218	0.058577	0.238494	0.414226	0.669456	0.974895	0.527197	0.403361	0.008368	0.188285	0.472803	0.702929	0.970711	0.476987
0.308197	0.360656	0.331148	0.203947	0.200658	0.263158	0.019672	0.22623	0.390164	0.691803	1	0.006557	0.245902	0.511475	0.783607	0.993443	0.003279	0.262295	0.52459	0.757377	0.990164	0.429508	0.203279	0.367213	0.078947	0.065789	0	0.003279	0.259016	0.495082	0.681967	1	0.006557	0.07541	0.331148	0.472131	0.934426	0.118033	0.347541	0.685246	0.786885	0.990164	0.652459	0.368421	0.006557	0.255738	0.47541	0.740984	0.986885	0.380328
0.327225	0.38089	0.291885	0.238532	0.178244	0.23329	0.005236	0.298429	0.549738	0.776178	0.994764	0.002618	0.204188	0.413613	0.700262	0.997382	0.001309	0.268325	0.530105	0.757853	1	0.608639	0.25	0.141361	0.099607	0.031455	0.002621	0.001309	0.208115	0.509162	0.781414	1	0.018325	0.244764	0.422775	0.715969	0.973822	0.370419	0.443717	0.496073	0.606021	0.98822	0.479058	0.440367	0.006545	0.325916	0.537958	0.759162	0.998691	0.405759
0.305556	0.353175	0.34127	0.231076	0.135458	0.247012	0.011905	0.293651	0.460317	0.698413	0.984127	0.007937	0.242063	0.468254	0.666667	0.988095	0.003968	0.214286	0.579365	0.81746	1	0.539683	0.126984	0.333333	0.055777	0.047809	0.007968	0.003968	0.242063	0.440476	0.650794	1	0.15873	0.22619	0.309524	0.603175	0.686508	0.02381	0.325397	0.793651	0.876984	0.980159	0.444444	0.350598	0.015873	0.25	0.563492	0.81746	0.992063	0.404762
0.23622	0.488189	0.275591	0.18254	0.142857	0.230159	0.023622	0.291339	0.574803	0.866142	1	0.031496	0.220472	0.448819	0.653543	0.984252	0.007874	0.19685	0.590551	0.787402	0.929134	0.661417	0.141732	0.19685	0.047619	0.031746	0	0.007874	0.19685	0.362205	0.527559	1	0.149606	0.173228	0.606299	0.637795	0.740157	0.771654	0.811024	0.858268	0.913386	0.968504	0.370079	0.301587	0.086614	0.251969	0.614173	0.787402	0.929134	0.559055
0.308057	0.265403	0.42654	0.152381	0.17619	0.266667	0.009479	0.488152	0.649289	0.862559	1	0.018957	0.189573	0.450237	0.744076	0.985782	0.004739	0.227488	0.393365	0.578199	0.943128	0.312796	0.085308	0.601896	0.02381	0.061905	0.014286	0.004739	0.516588	0.824645	0.919431	1	0.601896	0.616114	0.663507	0.682464	0.900474	0.028436	0.170616	0.364929	0.530806	0.819905	0.511848	0.27619	0.033175	0.180095	0.379147	0.611374	0.895735	0.274882
0.303922	0.333333	0.362745	0.217822	0.188119	0.257426	0.019608	0.372549	0.598039	0.754902	1	0.039216	0.294118	0.539216	0.764706	0.990196	0.009804	0.186275	0.284314	0.607843	0.980392	0.303922	0.098039	0.598039	0.059406	0.059406	0	0.009804	0.068627	0.686275	0.843137	1	0.784314	0.794118	0.901961	0.95098	0.980392	0.078431	0.215686	0.362745	0.519608	0.745098	0.382353	0.376238	0.04902	0.166667	0.45098	0.598039	0.980392	0.323529
0.34585	0.337945	0.316206	0.225743	0.229703	0.239604	0.007905	0.272727	0.511858	0.778656	0.992095	0.003953	0.187747	0.460474	0.749012	1	0.001976	0.245059	0.509881	0.737154	0.998024	0.357708	0.090909	0.551383	0.043564	0.10297	0.007921	0.001976	0.183794	0.458498	0.699605	1	0.013834	0.136364	0.229249	0.492095	0.66996	0.045455	0.335968	0.551383	0.812253	0.992095	0.596838	0.392079	0.005929	0.237154	0.486166	0.747036	0.994071	0.320158
0.295806	0.397351	0.306843	0.252212	0.170354	0.252212	0.011038	0.253863	0.532009	0.750552	1	0.004415	0.245033	0.516556	0.739514	0.995585	0.002208	0.203091	0.448124	0.746137	0.997792	0.653422	0.196468	0.15011	0.070796	0.057522	0.00885	0.002208	0.247241	0.549669	0.752759	1	0.015453	0.344371	0.450331	0.785872	0.988962	0.028698	0.143488	0.335541	0.695364	0.896247	0.454746	0.30531	0.015453	0.249448	0.470199	0.818985	0.997792	0.388521
0.312693	0.340557	0.346749	0.208075	0.214286	0.208075	0.021672	0.30031	0.517028	0.718266	0.996904	0.006192	0.164087	0.390093	0.671827	0.993808	0.003096	0.28483	0.563467	0.789474	1	0.442724	0.28483	0.272446	0.127329	0.059006	0.009317	0.003096	0.188854	0.470588	0.773994	1	0.037152	0.325077	0.55418	0.705882	0.876161	0.068111	0.229102	0.504644	0.885449	0.978328	0.591331	0.378882	0.009288	0.210526	0.498452	0.76161	0.987616	0.377709
0.375	0.25	0.375	0.264368	0.195402	0.172414	0.204545	0.443182	0.613636	0.75	0.988636	0.022727	0.261364	0.454545	0.704545	0.954545	0.011364	0.113636	0.238636	0.534091	1	0.272727	0	0.727273	0	0.045977	0	0.011364	0.670455	0.863636	0.931818	1	0	0	0	0	0	0.022727	0.193182	0.375	0.556818	0.840909	0.318182	0.344828	0.034091	0.284091	0.511364	0.806818	0.977273	0.193182
0.32	0.431579	0.248421	0.270042	0.172996	0.225738	0.004211	0.256842	0.553684	0.778947	0.995789	0.010526	0.237895	0.484211	0.722105	1	0.002105	0.24	0.450526	0.749474	0.997895	0.421053	0.082105	0.496842	0.052743	0.107595	0.010549	0.002105	0.261053	0.589474	0.797895	1	0.008421	0.52	0.806316	0.871579	0.987368	0.023158	0.229474	0.402105	0.610526	0.974737	0.492632	0.405063	0.006316	0.305263	0.543158	0.766316	0.993684	0.452632
0.292079	0.368812	0.339109	0.215881	0.220844	0.275434	0.00495	0.267327	0.517327	0.789604	0.990099	0.007426	0.227723	0.467822	0.690594	0.997525	0.002475	0.252475	0.522277	0.762376	1	0.413366	0.20297	0.383663	0.084367	0.064516	0	0.002475	0.133663	0.423267	0.740099	1	0.086634	0.220297	0.542079	0.839109	0.935644	0.170792	0.321782	0.514851	0.727723	0.99505	0.569307	0.372208	0.022277	0.299505	0.539604	0.727723	0.982673	0.413366
0.297436	0.328205	0.374359	0.247423	0.206186	0.231959	0.015385	0.235897	0.497436	0.779487	0.994872	0.010256	0.220513	0.476923	0.682051	1	0.005128	0.261538	0.507692	0.748718	0.984615	0.405128	0.128205	0.466667	0.046392	0.046392	0.015464	0.005128	0.235897	0.384615	0.666667	1	0.112821	0.169231	0.2	0.282051	0.938462	0.015385	0.425641	0.564103	0.8	0.923077	0.564103	0.371134	0.025641	0.230769	0.523077	0.784615	0.984615	0.34359
0.372642	0.240566	0.386792	0.170616	0.255924	0.189573	0.009434	0.311321	0.580189	0.783019	0.995283	0.066038	0.240566	0.433962	0.679245	0.938679	0.004717	0.193396	0.45283	0.712264	1	0.339623	0.103774	0.556604	0.056872	0.085308	0	0.004717	0.183962	0.391509	0.783019	1	0.113208	0.193396	0.358491	0.816038	0.853774	0.014151	0.301887	0.528302	0.726415	0.990566	0.523585	0.398104	0.018868	0.212264	0.448113	0.731132	0.971698	0.226415
0.31875	0.4	0.28125	0.245283	0.157233	0.226415	0.0125	0.1625	0.3625	0.6125	0.99375	0.04375	0.33125	0.55625	0.8	1	0.00625	0.2125	0.475	0.76875	0.95	0.40625	0.1375	0.45625	0.050314	0.075472	0	0.00625	0.2625	0.5	0.76875	1	0.01875	0.04375	0.45	0.48125	0.675	0.0875	0.325	0.55	0.775	0.95	0.53125	0.377358	0.01875	0.25625	0.55625	0.8125	0.98125	0.4125
0.238532	0.472477	0.288991	0.216092	0.142529	0.255172	0.009174	0.227064	0.504587	0.759174	0.997706	0.004587	0.305046	0.529817	0.740826	1	0.002294	0.208716	0.451835	0.736239	0.993119	0.486239	0.497706	0.016055	0.174713	0.004598	0	0.002294	0.266055	0.538991	0.752294	1	0.006881	0.231651	0.454128	0.678899	0.993119	0.791284	0.791284	0.795872	0.800459	0.805046	0.639908	0.317241	0.004587	0.247706	0.479358	0.738532	0.988532	0.479358
0.191304	0.413043	0.395652	0.115468	0.124183	0.30719	0.013043	0.421739	0.582609	0.771739	0.997826	0.004348	0.25	0.408696	0.7	0.991304	0.002174	0.230435	0.506522	0.791304	1	0.343478	0.054348	0.602174	0.019608	0.076253	0.006536	0.002174	0.267391	0.493478	0.584783	1	0.028261	0.258696	0.306522	0.680435	0.747826	0.008696	0.234783	0.595652	0.797826	0.967391	0.697826	0.204793	0.028261	0.26087	0.458696	0.782609	0.993478	0.415217
0.373541	0.307393	0.319066	0.21875	0.226562	0.238281	0.015564	0.29572	0.564202	0.797665	0.992218	0.007782	0.202335	0.439689	0.735409	1	0.003891	0.245136	0.451362	0.719844	0.996109	0.338521	0.062257	0.599222	0.03125	0.109375	0	0.003891	0.159533	0.330739	0.708171	1	0.011673	0.023346	0.120623	0.229572	0.252918	0.046693	0.392996	0.583658	0.797665	0.992218	0.55642	0.351562	0.007782	0.245136	0.451362	0.747082	0.996109	0.342412
0.495192	0.235577	0.269231	0.236715	0.309179	0.130435	0.009615	0.240385	0.466346	0.673077	1	0.033654	0.211538	0.524038	0.783654	0.995192	0.004808	0.264423	0.519231	0.788462	0.980769	0.278846	0.009615	0.711538	0.009662	0.057971	0	0.004808	0.067308	0.168269	0.817308	1	0.841346	0.841346	0.841346	0.841346	0.846154	0.086538	0.375	0.557692	0.735577	0.956731	0.322115	0.47343	0.019231	0.336538	0.528846	0.735577	0.947115	0.278846
0.225182	0.498789	0.276029	0.206311	0.11165	0.220874	0.007264	0.179177	0.40678	0.709443	1	0.004843	0.205811	0.421308	0.641646	0.995157	0.002421	0.467312	0.68523	0.825666	0.997579	0.549637	0.077482	0.372881	0.031553	0.055825	0.007282	0.002421	0.16707	0.384988	0.530266	1	0.423729	0.813559	0.837772	0.961259	0.987893	0.014528	0.305085	0.658596	0.762712	0.968523	0.549637	0.257282	0.01937	0.377724	0.624697	0.808717	0.985472	0.498789
0.288401	0.393417	0.318182	0.210361	0.196232	0.254317	0.00627	0.22884	0.504702	0.739812	1	0.003135	0.247649	0.49373	0.761755	0.99373	0.001567	0.252351	0.503135	0.755486	0.996865	0.545455	0.148903	0.305643	0.064364	0.070644	0.00471	0.001567	0.305643	0.537618	0.763323	1	0.181818	0.365204	0.449843	0.710031	0.985893	0.007837	0.15047	0.338558	0.742947	0.9279	0.561129	0.436421	0.010972	0.277429	0.514107	0.746082	0.996865	0.412226
0.265244	0.432927	0.301829	0.223242	0.168196	0.253823	0.030488	0.289634	0.515244	0.713415	0.984756	0.006098	0.198171	0.429878	0.75	0.996951	0.003049	0.27439	0.545732	0.746951	1	0.448171	0.125	0.426829	0.061162	0.103976	0	0.003049	0.152439	0.280488	0.676829	1	0.07622	0.35061	0.512195	0.792683	0.981707	0.012195	0.390244	0.60061	0.756098	0.957317	0.490854	0.40367	0.012195	0.265244	0.490854	0.707317	0.990854	0.457317
0.235294	0.258824	0.505882	0.100592	0.218935	0.284024	0.023529	0.258824	0.541176	0.747059	0.994118	0.011765	0.241176	0.511765	0.770588	1	0.005882	0.235294	0.482353	0.735294	0.988235	0.264706	0.111765	0.623529	0.035503	0.059172	0	0.005882	0.211765	0.370588	0.764706	1	0.235294	0.252941	0.3	0.729412	0.758824	0.047059	0.335294	0.529412	0.829412	0.988235	0.758824	0.106509	0.052941	0.3	0.511765	0.729412	0.952941	0.247059
0.361314	0.324818	0.313869	0.216117	0.267399	0.21978	0.010949	0.251825	0.510949	0.751825	0.970803	0.007299	0.229927	0.437956	0.642336	1	0.00365	0.233577	0.532847	0.80292	0.992701	0.467153	0.20073	0.332117	0.07326	0.058608	0.007326	0.00365	0.218978	0.452555	0.678832	1	0.120438	0.328467	0.740876	0.824818	0.985401	0.025547	0.182482	0.510949	0.69708	0.948905	0.5	0.446886	0.018248	0.244526	0.49635	0.762774	0.992701	0.39781
0.396624	0.383966	0.219409	0.313559	0.15678	0.194915	0.029536	0.303797	0.548523	0.827004	1	0.008439	0.21519	0.489451	0.725738	0.995781	0.004219	0.227848	0.379747	0.620253	0.945148	0.738397	0.160338	0.101266	0.072034	0.04661	0.012712	0.004219	0.227848	0.548523	0.738397	1	0.012658	0.244726	0.329114	0.43038	0.953586	0.084388	0.105485	0.751055	0.78903	0.978903	0.333333	0.338983	0.016878	0.244726	0.388186	0.607595	0.945148	0.413502
0.235683	0.495595	0.268722	0.222958	0.121413	0.267108	0.004405	0.209251	0.449339	0.687225	0.991189	0.008811	0.257709	0.515419	0.76652	0.997797	0.002203	0.237885	0.502203	0.755507	1	0.548458	0.185022	0.26652	0.086093	0.041943	0.002208	0.002203	0.306167	0.493392	0.746696	1	0.14978	0.314978	0.482379	0.759912	0.988987	0.006608	0.171806	0.511013	0.680617	0.947137	0.594714	0.313466	0.006608	0.279736	0.54185	0.764317	0.991189	0.519824
0.29902	0.377451	0.323529	0.246305	0.187192	0.231527	0.009804	0.196078	0.416667	0.72549	0.990196	0.039216	0.294118	0.539216	0.735294	1	0.004902	0.186275	0.470588	0.75	0.980392	0.401961	0.171569	0.426471	0.08867	0.078818	0	0.004902	0.235294	0.553922	0.705882	1	0.009804	0.176471	0.441176	0.651961	0.838235	0.078431	0.264706	0.5	0.877451	0.990196	0.617647	0.35468	0.014706	0.235294	0.514706	0.720588	0.985294	0.455882
0.309211	0.431579	0.259211	0.27668	0.142292	0.212121	0.002632	0.236842	0.492105	0.740789	0.994737	0.009211	0.289474	0.569737	0.840789	1	0.001316	0.173684	0.389474	0.628947	0.989474	0.486842	0.107895	0.405263	0.043478	0.069829	0.006588	0.001316	0.314474	0.606579	0.853947	1	0.047368	0.106579	0.339474	0.568421	0.703947	0.005263	0.234211	0.476316	0.672368	0.939474	0.514474	0.324111	0.007895	0.256579	0.444737	0.638158	0.981579	0.452632
0.377483	0.274834	0.347682	0.245847	0.255814	0.199336	0.006623	0.288079	0.516556	0.791391	1	0.009934	0.215232	0.536424	0.698675	0.980132	0.003311	0.228477	0.440397	0.715232	0.996689	0.44702	0.231788	0.321192	0.099668	0.053156	0	0.003311	0.231788	0.52649	0.721854	1	0.013245	0.082781	0.221854	0.380795	0.715232	0.304636	0.437086	0.761589	0.907285	0.990066	0.519868	0.398671	0.009934	0.245033	0.44702	0.675497	0.943709	0.274834
0.392857	0.339286	0.267857	0.243728	0.18638	0.193548	0.007143	0.214286	0.489286	0.839286	0.996429	0.021429	0.196429	0.435714	0.692857	0.992857	0.003571	0.357143	0.532143	0.732143	1	0.528571	0.2	0.271429	0.075269	0.075269	0.02509	0.003571	0.171429	0.328571	0.775	1	0.117857	0.403571	0.542857	0.65	0.989286	0.025	0.385714	0.582143	0.735714	0.9	0.475	0.272401	0.010714	0.364286	0.485714	0.664286	0.982143	0.378571
0.358382	0.317919	0.323699	0.257971	0.214493	0.176812	0.008671	0.257225	0.5	0.728324	1	0.020231	0.225434	0.491329	0.742775	0.99711	0.00289	0.277457	0.50289	0.797688	0.991329	0.410405	0.15896	0.430636	0.072464	0.084058	0.002899	0.00289	0.297688	0.534682	0.731214	1	0.112717	0.228324	0.447977	0.50289	0.959538	0.037572	0.219653	0.627168	0.797688	0.985549	0.560694	0.307246	0.031792	0.225434	0.450867	0.786127	0.991329	0.381503
0.313656	0.343172	0.343172	0.204936	0.20758	0.23182	0.000881	0.277533	0.501762	0.75022	0.998678	0.004405	0.24978	0.498678	0.756388	1	0.000441	0.222467	0.491189	0.744934	0.999119	0.393833	0.038326	0.567841	0.016747	0.094315	0.005289	0.000441	0.262996	0.478855	0.736123	1	0.096035	0.284581	0.440529	0.80793	0.972247	0.001322	0.214978	0.537004	0.754626	0.998238	0.543172	0.346408	0.003524	0.221586	0.525991	0.752423	0.999119	0.35815
0.303922	0.421569	0.27451	0.267327	0.118812	0.267327	0.04902	0.176471	0.460784	0.813725	1	0.019608	0.27451	0.490196	0.686275	0.941176	0.009804	0.235294	0.480392	0.77451	0.990196	0.539216	0.460784	0	0.178218	0	0	0.009804	0.254902	0.480392	0.715686	1	0.039216	0.215686	0.568627	0.77451	0.990196	0	0	0	0	0	0.441176	0.435644	0.029412	0.303922	0.529412	0.666667	0.990196	0.421569
0.251908	0.423664	0.324427	0.222222	0.176245	0.272031	0.026718	0.29771	0.469466	0.744275	0.996183	0.01145	0.198473	0.553435	0.793893	1	0.003817	0.255725	0.480916	0.694656	0.980916	0.423664	0.171756	0.40458	0.072797	0.088123	0.003831	0.003817	0.232824	0.5	0.717557	1	0.007634	0.137405	0.255725	0.496183	0.78626	0.087786	0.332061	0.553435	0.805344	0.98855	0.69084	0.360153	0.007634	0.293893	0.522901	0.740458	0.98855	0.461832
0.449153	0.313559	0.237288	0.25779	0.254958	0.150142	0.008475	0.324859	0.601695	0.768362	1	0.00565	0.186441	0.387006	0.564972	0.99435	0.002825	0.189266	0.528249	0.782486	0.988701	0.19774	0.152542	0.649718	0.045326	0.028329	0	0.002825	0.118644	0.234463	0.372881	1	0.008475	0.042373	0.127119	0.169492	0.251412	0.262712	0.497175	0.661017	0.822034	0.988701	0.330508	0.413598	0.016949	0.138418	0.282486	0.675141	0.988701	0.347458
0.289756	0.387317	0.322927	0.199219	0.197266	0.27832	0.006829	0.229268	0.458537	0.739512	0.997073	0.001951	0.262439	0.524878	0.74439	1	0.000976	0.250732	0.490732	0.759024	0.999024	0.482927	0.156098	0.360976	0.101562	0.087891	0.001953	0.000976	0.251707	0.505366	0.777561	1	0.025366	0.381463	0.523902	0.725854	0.996098	0.009756	0.192195	0.486829	0.709268	0.970732	0.684878	0.318359	0.004878	0.227317	0.51122	0.741463	0.996098	0.436098
0.383721	0.476744	0.139535	0.217899	0.136187	0.101167	0.011628	0.317829	0.472868	0.817829	1	0.007752	0.20155	0.468992	0.670543	0.996124	0.003876	0.379845	0.600775	0.825581	0.957364	0.77907	0.096899	0.124031	0.050584	0.042802	0.003891	0.003876	0.271318	0.527132	0.744186	1	0.302326	0.395349	0.686047	0.856589	0.930233	0.01938	0.054264	0.085271	0.333333	0.957364	0.263566	0.311284	0.034884	0.209302	0.48062	0.674419	0.957364	0.5
0.47619	0.293651	0.230159	0.344	0.216	0.128	0.02381	0.238095	0.5	0.801587	0.992063	0.015873	0.214286	0.452381	0.666667	1	0.007937	0.34127	0.492063	0.730159	0.928571	0.277778	0.079365	0.642857	0.016	0.08	0	0.007937	0.380952	0.674603	0.849206	1	0.857143	0.865079	0.888889	0.904762	0.928571	0.031746	0.214286	0.373016	0.563492	0.801587	0.277778	0.384	0.047619	0.34127	0.52381	0.642857	0.928571	0.333333
0.29321	0.376543	0.330247	0.19195	0.19195	0.256966	0.012346	0.234568	0.496914	0.703704	0.990741	0.006173	0.33642	0.57716	0.805556	1	0.003086	0.175926	0.416667	0.675926	0.987654	0.388889	0.191358	0.419753	0.117647	0.099071	0.006192	0.003086	0.25	0.493827	0.679012	1	0.095679	0.197531	0.444444	0.651235	0.895062	0.012346	0.271605	0.527778	0.839506	0.987654	0.549383	0.390093	0.021605	0.240741	0.481481	0.740741	0.993827	0.391975
0.288835	0.378641	0.332524	0.184915	0.206813	0.248175	0.026699	0.293689	0.492718	0.762136	1	0.007282	0.199029	0.451456	0.711165	0.997573	0.002427	0.257282	0.543689	0.781553	0.992718	0.485437	0.143204	0.371359	0.053528	0.072993	0.009732	0.002427	0.264563	0.548544	0.771845	1	0.009709	0.436893	0.633495	0.723301	0.973301	0.024272	0.13835	0.407767	0.606796	0.88835	0.614078	0.340633	0.009709	0.237864	0.529126	0.75	0.992718	0.400485
0.30597	0.44403	0.25	0.2397	0.146067	0.269663	0.007463	0.309701	0.55597	0.791045	1	0.011194	0.201493	0.436567	0.686567	0.977612	0.003731	0.190299	0.522388	0.757463	0.981343	0.283582	0	0.716418	0	0.104869	0	0.003731	0.324627	0.514925	0.731343	1	0	0	0	0	0	0.011194	0.235075	0.477612	0.75	0.977612	0.58209	0.397004	0.014925	0.246269	0.470149	0.716418	0.977612	0.44403
0.305556	0.438889	0.255556	0.251397	0.122905	0.206704	0.116667	0.322222	0.572222	0.861111	1	0.016667	0.194444	0.461111	0.705556	0.972222	0.005556	0.105556	0.377778	0.616667	0.983333	0.616667	0.061111	0.322222	0.027933	0.072626	0.005587	0.005556	0.227778	0.438889	0.633333	1	0.333333	0.338889	0.355556	0.383333	0.666667	0.033333	0.105556	0.766667	0.844444	0.983333	0.4	0.312849	0.022222	0.144444	0.388889	0.611111	0.922222	0.466667
0.254274	0.433761	0.311966	0.199143	0.164882	0.256959	0.008547	0.205128	0.472222	0.688034	0.995726	0.004274	0.284188	0.529915	0.775641	1	0.002137	0.237179	0.474359	0.711538	0.991453	0.523504	0.277778	0.198718	0.098501	0.051392	0.004283	0.002137	0.25	0.527778	0.728632	1	0.070513	0.331197	0.510684	0.720085	0.991453	0.010684	0.134615	0.288462	0.878205	0.942308	0.49359	0.342612	0.012821	0.232906	0.435897	0.683761	0.991453	0.463675
0.277533	0.411894	0.310573	0.236203	0.161148	0.269316	0.004405	0.268722	0.480176	0.759912	0.997797	0.006608	0.222467	0.482379	0.720264	1	0.002203	0.259912	0.544053	0.748899	0.991189	0.464758	0.14978	0.385463	0.05298	0.07947	0.004415	0.002203	0.259912	0.511013	0.755507	1	0.028634	0.209251	0.537445	0.797357	0.993392	0.046256	0.244493	0.449339	0.718062	0.96696	0.64978	0.291391	0.024229	0.26652	0.513216	0.729075	0.991189	0.429515
0.181818	0.472727	0.345455	0.203704	0.092593	0.333333	0.072727	0.109091	0.654545	0.709091	0.836364	0.036364	0.254545	0.6	0.8	1	0.018182	0.163636	0.309091	0.436364	0.909091	0.418182	0.254545	0.327273	0.074074	0.111111	0.037037	0.018182	0.472727	0.581818	0.763636	1	0.072727	0.109091	0.454545	0.836364	0.909091	0.163636	0.236364	0.327273	0.4	0.745455	0.581818	0.148148	0.090909	0.236364	0.381818	0.727273	0.909091	0.509091
0.176101	0.355346	0.468553	0.154574	0.11041	0.328076	0.009434	0.188679	0.443396	0.738994	0.996855	0.006289	0.273585	0.518868	0.764151	1	0.003145	0.245283	0.484277	0.707547	0.993711	0.301887	0.09434	0.603774	0.031546	0.069401	0.006309	0.003145	0.194969	0.446541	0.751572	1	0.012579	0.327044	0.40566	0.537736	0.965409	0.059748	0.242138	0.509434	0.783019	0.993711	0.754717	0.157729	0.012579	0.261006	0.496855	0.742138	0.993711	0.323899
0.277778	0.402778	0.319444	0.197183	0.183099	0.253521	0.055556	0.208333	0.541667	0.680556	1	0.097222	0.305556	0.555556	0.805556	0.972222	0.013889	0.125	0.333333	0.569444	0.986111	0.486111	0.097222	0.416667	0.042254	0.070423	0.014085	0.013889	0.472222	0.694444	0.819444	1	0.388889	0.388889	0.416667	0.958333	0.986111	0.041667	0.125	0.263889	0.361111	0.611111	0.430556	0.338028	0.027778	0.194444	0.333333	0.458333	0.986111	0.444444
0.219388	0.392857	0.387755	0.169231	0.158974	0.241026	0.020408	0.311224	0.647959	0.790816	0.994898	0.010204	0.163265	0.418367	0.72449	0.989796	0.005102	0.306122	0.484694	0.688776	1	0.352041	0.066327	0.581633	0.041026	0.051282	0.010256	0.005102	0.086735	0.647959	0.867347	1	0.295918	0.780612	0.816327	0.831633	0.984694	0.091837	0.285714	0.454082	0.596939	0.979592	0.494898	0.358974	0.02551	0.265306	0.494898	0.658163	0.984694	0.423469
0.254321	0.44321	0.302469	0.213844	0.147095	0.264524	0.003704	0.22716	0.467901	0.712346	0.98642	0.002469	0.312346	0.591358	0.792593	1	0.001235	0.190123	0.382716	0.671605	0.998765	0.660494	0.150617	0.188889	0.05068	0.038319	0.001236	0.001235	0.32963	0.585185	0.804938	1	0.048148	0.12716	0.220988	0.440741	0.998765	0.009877	0.302469	0.47037	0.679012	0.891358	0.465432	0.331273	0.004938	0.197531	0.434568	0.718519	0.998765	0.479012
0.30485	0.383372	0.311778	0.208333	0.189815	0.266204	0.004619	0.281755	0.524249	0.769053	0.995381	0.030023	0.247113	0.494226	0.73903	1	0.002309	0.228637	0.471132	0.720554	0.997691	0.399538	0.150115	0.450346	0.069444	0.083333	0	0.002309	0.258661	0.524249	0.806005	1	0.182448	0.34873	0.547344	0.875289	0.997691	0.006928	0.145497	0.43418	0.672055	0.95612	0.618938	0.402778	0.006928	0.247113	0.457275	0.692841	0.997691	0.420323
0.168317	0.366337	0.465347	0.111111	0.125	0.357143	0.00396	0.164356	0.49901	0.752475	1	0.015842	0.253465	0.469307	0.726733	0.992079	0.00198	0.263366	0.508911	0.748515	0.994059	0.209901	0.005941	0.784158	0.005952	0.065476	0.001984	0.00198	0.168317	0.364356	0.675248	1	0.152475	0.152475	0.152475	0.154455	0.338614	0.027723	0.281188	0.520792	0.762376	0.99604	0.766337	0.206349	0.019802	0.281188	0.520792	0.754455	0.986139	0.370297
0.397959	0.255102	0.346939	0.247423	0.278351	0.206186	0.040816	0.27551	0.591837	0.795918	1	0.071429	0.173469	0.377551	0.693878	0.979592	0.010204	0.234694	0.428571	0.632653	0.969388	0.234694	0	0.765306	0	0.082474	0	0.010204	0.326531	0.387755	0.642857	1	0	0	0	0	0	0.030612	0.204082	0.489796	0.755102	0.94898	0.469388	0.43299	0.05102	0.285714	0.489796	0.642857	0.918367	0.285714
0.295775	0.373239	0.330986	0.234043	0.205674	0.297872	0.014085	0.316901	0.570423	0.767606	0.992958	0.042254	0.232394	0.521127	0.732394	1	0.007042	0.161972	0.373239	0.661972	0.985915	0.43662	0.211268	0.352113	0.099291	0.070922	0	0.007042	0.288732	0.647887	0.795775	1	0.204225	0.521127	0.746479	0.823944	0.93662	0.035211	0.112676	0.34507	0.450704	0.964789	0.5	0.425532	0.021127	0.133803	0.316901	0.577465	0.971831	0.429577
0.154867	0.451327	0.393805	0.137472	0.095344	0.372506	0.004425	0.327434	0.676991	0.887168	1	0.006637	0.25885	0.50885	0.725664	0.997788	0.002212	0.210177	0.451327	0.701327	0.982301	0.365044	0.024336	0.610619	0.011086	0.068736	0.011086	0.002212	0.331858	0.619469	0.89823	1	0.134956	0.137168	0.318584	0.603982	0.70354	0.011062	0.227876	0.466814	0.668142	0.973451	0.787611	0.133038	0.013274	0.230088	0.45354	0.661504	0.995575	0.440265
0.165829	0.492462	0.341709	0.146465	0.111111	0.237374	0.01005	0.351759	0.527638	0.663317	1	0.015075	0.236181	0.482412	0.763819	0.984925	0.005025	0.160804	0.462312	0.748744	0.994975	0.557789	0.396985	0.045226	0.10101	0.020202	0.010101	0.005025	0.271357	0.527638	0.718593	1	0.055276	0.145729	0.462312	0.78392	0.994975	0.035176	0.045226	0.869347	0.879397	0.894472	0.643216	0.262626	0.040201	0.336683	0.557789	0.81407	0.994975	0.472362
0.314136	0.376963	0.308901	0.268421	0.231579	0.226316	0.010471	0.350785	0.565445	0.780105	1	0.015707	0.219895	0.471204	0.706806	0.968586	0.005236	0.136126	0.445026	0.675393	0.989529	0.586387	0.240838	0.172775	0.115789	0.042105	0	0.005236	0.225131	0.471204	0.743455	1	0.209424	0.439791	0.549738	0.790576	0.994764	0.020942	0.057592	0.308901	0.675393	0.942408	0.596859	0.421053	0.015707	0.17801	0.429319	0.664921	0.984293	0.455497
0.262115	0.427313	0.310573	0.211921	0.172185	0.284768	0.006608	0.248899	0.469163	0.72467	0.986784	0.004405	0.277533	0.526432	0.76652	1	0.002203	0.200441	0.462555	0.702643	0.988987	0.53304	0.202643	0.264317	0.07064	0.07947	0	0.002203	0.202643	0.5	0.792952	1	0.011013	0.290749	0.42511	0.715859	0.854626	0.028634	0.22467	0.544053	0.634361	0.951542	0.621145	0.353201	0.008811	0.22467	0.493392	0.751101	0.995595	0.414097
0.32732	0.389175	0.283505	0.232558	0.170543	0.209302	0.007732	0.255155	0.579897	0.783505	0.997423	0.005155	0.242268	0.427835	0.646907	1	0.002577	0.229381	0.551546	0.760309	0.994845	0.559278	0.046392	0.39433	0.023256	0.090439	0.002584	0.002577	0.242268	0.42268	0.615979	1	0.100515	0.108247	0.543814	0.564433	0.842784	0.020619	0.275773	0.706186	0.819588	0.979381	0.412371	0.372093	0.010309	0.221649	0.5	0.744845	0.974227	0.425258
0.321716	0.359249	0.319035	0.225806	0.209677	0.231183	0.005362	0.225201	0.477212	0.72118	0.994638	0.010724	0.238606	0.55496	0.780161	0.997319	0.002681	0.276139	0.504021	0.707775	1	0.463807	0.115282	0.420912	0.051075	0.083333	0.008065	0.002681	0.211796	0.426273	0.75067	1	0.045576	0.345845	0.678284	0.828418	0.932976	0.02681	0.294906	0.504021	0.718499	0.989276	0.61126	0.317204	0.024129	0.319035	0.552279	0.772118	0.970509	0.402145
0.319747	0.316185	0.364068	0.187648	0.229216	0.240697	0.00277	0.255243	0.506529	0.738821	1	0.000791	0.261575	0.495845	0.766522	0.999209	0.000396	0.233478	0.495449	0.742778	0.999604	0.419865	0.123862	0.456272	0.057799	0.08947	0.009501	0.000396	0.365651	0.552434	0.752275	1	0.018599	0.458251	0.67036	0.863474	0.987732	0.004353	0.164226	0.331223	0.650178	0.998021	0.559953	0.406176	0.002374	0.233478	0.518797	0.771666	0.997626	0.339929
0.3	0.34375	0.35625	0.181818	0.219436	0.241379	0.028125	0.225	0.559375	0.7625	0.99375	0.00625	0.2125	0.459375	0.6875	1	0.003125	0.29375	0.515625	0.790625	0.996875	0.4875	0.19375	0.31875	0.07837	0.059561	0.009404	0.003125	0.1625	0.484375	0.696875	1	0.0125	0.290625	0.446875	0.653125	0.871875	0.1	0.375	0.621875	0.825	0.978125	0.6375	0.338558	0.0125	0.3125	0.503125	0.728125	0.9875	0.3875
0.209115	0.351206	0.439678	0.120968	0.153226	0.30914	0.010724	0.353887	0.61126	0.793566	0.991957	0.005362	0.225201	0.495979	0.761394	0.997319	0.002681	0.230563	0.447721	0.731903	1	0.386059	0.029491	0.58445	0.013441	0.051075	0.002688	0.002681	0.179625	0.49866	0.798928	1	0.268097	0.270777	0.36193	0.865952	0.873995	0.08311	0.241287	0.520107	0.731903	0.975871	0.670241	0.182796	0.008043	0.241287	0.428954	0.739946	0.970509	0.36193
0.372671	0.254658	0.372671	0.15625	0.31875	0.23125	0.012422	0.242236	0.434783	0.795031	0.993789	0.031056	0.347826	0.552795	0.732919	0.981366	0.006211	0.198758	0.47205	0.708075	1	0.428571	0.204969	0.36646	0.0625	0.0625	0	0.006211	0.372671	0.565217	0.888199	1	0.385093	0.453416	0.701863	0.751553	0.832298	0.018634	0.130435	0.26087	0.571429	0.664596	0.540373	0.425	0.024845	0.21118	0.490683	0.720497	0.956522	0.273292
0.301538	0.363077	0.335385	0.240741	0.20679	0.228395	0.006154	0.246154	0.535385	0.775385	1	0.012308	0.236923	0.433846	0.673846	0.950769	0.003077	0.243077	0.553846	0.772308	0.993846	0.4	0.163077	0.436923	0.055556	0.080247	0	0.003077	0.255385	0.504615	0.72	1	0.015385	0.107692	0.44	0.572308	0.787692	0.043077	0.230769	0.56	0.818462	0.993846	0.606154	0.388889	0.012308	0.2	0.458462	0.692308	0.984615	0.36
0.395722	0.272727	0.331551	0.204301	0.263441	0.16129	0.010695	0.28877	0.620321	0.860963	1	0.02139	0.197861	0.390374	0.663102	0.97861	0.005348	0.13369	0.454545	0.647059	0.919786	0.272727	0.010695	0.716578	0.010753	0.075269	0	0.005348	0.294118	0.374332	0.786096	1	0.31016	0.31016	0.31016	0.31016	0.315508	0.026738	0.229947	0.524064	0.727273	0.930481	0.427807	0.430108	0.016043	0.13369	0.438503	0.652406	0.983957	0.294118
0.314563	0.384466	0.300971	0.235409	0.200389	0.250973	0.007767	0.240777	0.495146	0.745631	0.990291	0.003883	0.24466	0.458252	0.753398	0.996117	0.001942	0.262136	0.52233	0.737864	1	0.335922	0.031068	0.63301	0.015564	0.093385	0	0.001942	0.190291	0.293204	0.623301	1	0.120388	0.126214	0.234951	0.308738	0.316505	0.009709	0.398058	0.590291	0.801942	0.996117	0.56699	0.416342	0.009709	0.267961	0.481553	0.716505	0.994175	0.36699
0.315789	0.339713	0.344498	0.221154	0.259615	0.192308	0.028708	0.315789	0.555024	0.779904	0.995215	0.009569	0.191388	0.430622	0.732057	0.990431	0.004785	0.215311	0.483254	0.727273	1	0.263158	0	0.736842	0	0.086538	0	0.004785	0.095694	0.421053	0.794258	1	0	0	0	0	0	0.009569	0.258373	0.502392	0.727273	0.961722	0.502392	0.403846	0.014354	0.267943	0.507177	0.727273	0.990431	0.325359
0.327273	0.387879	0.284848	0.240122	0.212766	0.234043	0.006061	0.336364	0.569697	0.80303	1	0.009091	0.215152	0.445455	0.715152	0.978788	0.00303	0.242424	0.475758	0.748485	0.984848	0.430303	0.275758	0.293939	0.106383	0.057751	0.009119	0.00303	0.342424	0.593939	0.812121	1	0.045455	0.284848	0.678788	0.836364	0.981818	0.006061	0.154545	0.330303	0.560606	0.651515	0.563636	0.389058	0.012121	0.206061	0.442424	0.675758	0.975758	0.363636
0.414105	0.370705	0.21519	0.378623	0.181159	0.168478	0.003617	0.262206	0.511754	0.734177	1	0.014467	0.222423	0.444846	0.681736	0.994575	0.001808	0.242315	0.594937	0.866184	0.998192	0.840868	0.068716	0.090416	0.025362	0.021739	0	0.001808	0.227848	0.437613	0.647378	1	0.074141	0.815552	0.904159	0.951175	0.972875	0.009042	0.831826	0.882459	0.929476	0.998192	0.117541	0.115942	0.005425	0.842676	0.880651	0.929476	0.992767	0.433996
0.362887	0.374227	0.262887	0.262126	0.21775	0.171311	0.002062	0.263918	0.509278	0.727835	1	0.003093	0.260825	0.54433	0.85567	0.998969	0.001031	0.205155	0.442268	0.665979	0.996907	0.396907	0.016495	0.586598	0.009288	0.067079	0.001032	0.001031	0.27732	0.631959	0.893814	1	0.006186	0.091753	0.095876	0.697938	0.982474	0.019588	0.234021	0.459794	0.670103	0.968041	0.450515	0.437564	0.004124	0.2	0.397938	0.694845	0.996907	0.374227
0.345679	0.283951	0.37037	0.2375	0.2375	0.2375	0.074074	0.296296	0.481481	0.814815	0.975309	0.037037	0.197531	0.506173	0.679012	0.962963	0.012346	0.111111	0.45679	0.62963	1	0.469136	0.17284	0.358025	0.0875	0.1125	0.0125	0.012346	0.345679	0.506173	0.666667	1	0.049383	0.074074	0.395062	0.604938	0.691358	0.111111	0.209877	0.296296	0.82716	0.962963	0.580247	0.375	0.037037	0.160494	0.419753	0.604938	0.950617	0.395062
0.33581	0.337296	0.326895	0.223214	0.202381	0.229167	0.002972	0.33581	0.566122	0.768202	0.998514	0.008915	0.237741	0.454681	0.77266	0.995542	0.001486	0.187221	0.46211	0.713224	1	0.393759	0.117385	0.488856	0.053571	0.071429	0.005952	0.001486	0.27786	0.517088	0.830609	1	0.008915	0.205052	0.334324	0.534918	0.965825	0.023774	0.251114	0.546805	0.692422	0.989599	0.528975	0.342262	0.005944	0.206538	0.427935	0.725111	0.991085	0.356612
0.174569	0.375	0.450431	0.11879	0.12959	0.343413	0.00431	0.31681	0.519397	0.704741	1	0.008621	0.209052	0.396552	0.69181	0.978448	0.002155	0.262931	0.56681	0.782328	0.997845	0.224138	0.032328	0.743534	0.008639	0.082073	0.00432	0.002155	0.092672	0.452586	0.711207	1	0.049569	0.053879	0.614224	0.821121	0.829741	0.045259	0.269397	0.508621	0.74569	0.997845	0.773707	0.159827	0.025862	0.25	0.480603	0.75431	0.99569	0.366379
0.226415	0.415094	0.358491	0.183544	0.164557	0.259494	0.245283	0.402516	0.566038	0.754717	1	0.012579	0.176101	0.440252	0.742138	0.974843	0.006289	0.188679	0.45283	0.72956	0.993711	0.610063	0.081761	0.308176	0.031646	0.056962	0.006329	0.006289	0.339623	0.559748	0.842767	1	0.484277	0.496855	0.591195	0.610063	0.685535	0.09434	0.163522	0.238994	0.465409	0.805031	0.371069	0.278481	0.081761	0.220126	0.503145	0.72956	0.874214	0.496855
0.287879	0.378788	0.333333	0.230769	0.153846	0.323077	0.106061	0.287879	0.515152	0.818182	1	0.030303	0.19697	0.5	0.666667	0.924242	0.015152	0.151515	0.424242	0.636364	0.969697	0.545455	0.454545	0	0.153846	0	0	0.015152	0.287879	0.666667	0.80303	1	0.030303	0.19697	0.409091	0.590909	0.878788	0	0	0	0	0	0.318182	0.430769	0.045455	0.348485	0.545455	0.69697	0.969697	0.484848
0.264074	0.492323	0.243603	0.241803	0.145492	0.223361	0.003071	0.244626	0.498465	0.795292	0.997953	0.004094	0.226203	0.451382	0.647902	0.998976	0.001024	0.314227	0.645855	0.818833	1	0.828045	0.100307	0.071648	0.064549	0.023566	0.003074	0.001024	0.273286	0.509724	0.734903	1	0.040942	0.238485	0.500512	0.763562	0.979529	0.002047	0.018424	0.266121	0.925281	0.997953	0.453429	0.446721	0.005118	0.311157	0.555783	0.773797	0.990788	0.524053
0.34715	0.274611	0.378238	0.203125	0.291667	0.213542	0.031088	0.238342	0.476684	0.792746	1	0.015544	0.181347	0.404145	0.647668	0.989637	0.005181	0.305699	0.523316	0.761658	0.984456	0.284974	0.139896	0.57513	0.026042	0.098958	0.015625	0.005181	0.316062	0.549223	0.678756	1	0.544041	0.611399	0.834197	0.917098	0.953368	0.051813	0.19171	0.357513	0.663212	0.963731	0.590674	0.364583	0.051813	0.290155	0.512953	0.735751	0.974093	0.341969
0.355469	0.335938	0.308594	0.223529	0.176471	0.243137	0.007812	0.277344	0.492188	0.6875	0.964844	0.015625	0.203125	0.550781	0.785156	1	0.003906	0.179688	0.425781	0.71875	0.992188	0.441406	0.273438	0.285156	0.105882	0.058824	0.011765	0.003906	0.414062	0.640625	0.804688	1	0.148438	0.476562	0.628906	0.8125	0.992188	0.011719	0.109375	0.195312	0.300781	0.96875	0.574219	0.337255	0.011719	0.265625	0.511719	0.765625	0.992188	0.332031
0.309917	0.380165	0.309917	0.182573	0.182573	0.232365	0.020661	0.264463	0.491736	0.72314	0.987603	0.008264	0.219008	0.475207	0.735537	0.991736	0.004132	0.260331	0.524793	0.789256	1	0.512397	0.157025	0.330579	0.082988	0.06639	0	0.004132	0.247934	0.450413	0.690083	1	0.173554	0.235537	0.46281	0.669421	0.826446	0.082645	0.272727	0.570248	0.85124	0.933884	0.632231	0.348548	0.012397	0.268595	0.516529	0.747934	0.995868	0.409091
0.25034	0.397279	0.352381	0.202997	0.162125	0.264305	0.009524	0.322449	0.526531	0.797279	0.998639	0.005442	0.22585	0.511565	0.767347	1	0.001361	0.228571	0.444898	0.682993	0.968707	0.318367	0.09932	0.582313	0.038147	0.057221	0.008174	0.001361	0.157823	0.635374	0.82585	1	0.004082	0.647619	0.719728	0.863946	0.938776	0.038095	0.27619	0.438095	0.590476	0.967347	0.642177	0.313351	0.002721	0.254422	0.468027	0.710204	0.967347	0.402721
0.265	0.3925	0.3425	0.220551	0.162907	0.275689	0.01	0.29	0.4225	0.6675	1	0.005	0.2025	0.4575	0.7175	0.99	0.0025	0.27	0.56	0.8225	0.9975	0.4075	0.2325	0.36	0.087719	0.032581	0.002506	0.0025	0.245	0.425	0.5875	1	0.035	0.3	0.4625	0.6125	0.9775	0.0625	0.15	0.7875	0.8825	0.995	0.5875	0.33584	0.0125	0.2275	0.5325	0.7525	0.985	0.38
0.187817	0.365482	0.446701	0.147959	0.142857	0.311224	0.010152	0.228426	0.406091	0.908629	1	0.045685	0.243655	0.477157	0.71066	0.969543	0.005076	0.269036	0.532995	0.751269	0.979695	0.218274	0.015228	0.766497	0.010204	0.071429	0	0.005076	0.187817	0.472081	0.812183	1	0.482234	0.482234	0.482234	0.48731	0.492386	0.010152	0.263959	0.532995	0.725888	0.944162	0.741117	0.173469	0.015228	0.238579	0.461929	0.720812	0.979695	0.329949
0.241071	0.5	0.258929	0.251121	0.107623	0.233184	0.026786	0.352679	0.607143	0.830357	0.977679	0.008929	0.236607	0.513393	0.71875	0.995536	0.004464	0.169643	0.361607	0.678571	1	0.736607	0.080357	0.183036	0.044843	0.026906	0	0.004464	0.3125	0.5625	0.754464	1	0.316964	0.330357	0.517857	0.535714	0.808036	0.138393	0.178571	0.223214	0.397321	0.964286	0.441964	0.313901	0.089286	0.214286	0.375	0.678571	0.955357	0.517857
0.223301	0.427184	0.349515	0.137255	0.117647	0.22549	0.019417	0.281553	0.504854	0.563107	0.92233	0.029126	0.349515	0.631068	0.825243	1	0.009709	0.126214	0.271845	0.650485	0.932039	0.650485	0.23301	0.116505	0.058824	0.039216	0.019608	0.009709	0.349515	0.572816	0.786408	1	0.029126	0.07767	0.135922	0.669903	0.873786	0.145631	0.165049	0.213592	0.446602	0.475728	0.485437	0.313725	0.038835	0.145631	0.359223	0.640777	0.932039	0.466019
0.327027	0.335135	0.337838	0.197832	0.246612	0.243902	0.005405	0.264865	0.489189	0.745946	0.991892	0.018919	0.232432	0.508108	0.732432	1	0.002703	0.205405	0.497297	0.751351	0.997297	0.391892	0.251351	0.356757	0.086721	0.075881	0	0.002703	0.289189	0.518919	0.794595	1	0.005405	0.389189	0.548649	0.694595	0.927027	0.027027	0.197297	0.405405	0.721622	0.972973	0.656757	0.365854	0.002703	0.245946	0.505405	0.732432	0.994595	0.362162
0.371698	0.424528	0.203774	0.289225	0.177694	0.164461	0.007547	0.228302	0.433962	0.720755	1	0.003774	0.271698	0.567925	0.745283	0.996226	0.001887	0.239623	0.496226	0.79434	0.979245	0.598113	0.073585	0.328302	0.028355	0.077505	0.005671	0.001887	0.290566	0.584906	0.775472	1	0.201887	0.566038	0.818868	0.845283	0.966038	0.018868	0.216981	0.390566	0.477358	0.986792	0.335849	0.378072	0.015094	0.290566	0.562264	0.807547	0.986792	0.445283
0.208696	0.469565	0.321739	0.236842	0.061404	0.333333	0.034783	0.313043	0.521739	0.695652	0.965217	0.017391	0.252174	0.478261	0.704348	1	0.008696	0.217391	0.4	0.756522	0.93913	0.6	0.069565	0.330435	0.052632	0.035088	0	0.008696	0.321739	0.469565	0.669565	1	0.478261	0.521739	0.53913	0.556522	0.930435	0.13913	0.208696	0.295652	0.765217	0.852174	0.513043	0.280702	0.069565	0.243478	0.434783	0.73913	0.982609	0.417391
0.480349	0.266376	0.253275	0.254386	0.276316	0.149123	0.008734	0.235808	0.458515	0.694323	1	0.026201	0.279476	0.537118	0.820961	0.995633	0.004367	0.227074	0.484716	0.681223	0.982533	0.39738	0.004367	0.598253	0.008772	0.070175	0	0.004367	0.257642	0.790393	0.89083	1	0.017467	0.017467	0.017467	0.017467	0.017467	0.074236	0.235808	0.419214	0.58952	0.9869	0.340611	0.464912	0.017467	0.305677	0.484716	0.668122	0.982533	0.336245
0.349057	0.292453	0.358491	0.232227	0.2891	0.156398	0.033019	0.292453	0.54717	0.759434	0.995283	0.009434	0.183962	0.438679	0.688679	0.990566	0.004717	0.259434	0.485849	0.75	1	0.320755	0.122642	0.556604	0.047393	0.085308	0	0.004717	0.169811	0.443396	0.740566	1	0.037736	0.174528	0.457547	0.650943	0.886792	0.089623	0.330189	0.518868	0.783019	0.990566	0.556604	0.379147	0.018868	0.226415	0.466981	0.665094	0.981132	0.29717
0.275908	0.40646	0.317631	0.225067	0.171159	0.238544	0.005384	0.223419	0.492598	0.738896	0.998654	0.004038	0.266487	0.48856	0.725437	0.997308	0.001346	0.240915	0.512786	0.783311	1	0.468371	0.020188	0.51144	0.008086	0.080863	0.005391	0.001346	0.297443	0.573351	0.73755	1	0.58681	0.589502	0.729475	0.920592	0.95424	0.002692	0.181696	0.461642	0.757739	0.974428	0.549125	0.366577	0.006729	0.282638	0.51144	0.755047	0.989233	0.411844
0.305233	0.390988	0.303779	0.225619	0.206696	0.248908	0.023256	0.292151	0.527616	0.760174	1	0.00436	0.235465	0.491279	0.732558	0.99564	0.001453	0.219477	0.475291	0.738372	0.986919	0.607558	0.347384	0.045058	0.138282	0.016012	0.001456	0.001453	0.252907	0.501453	0.74564	1	0.031977	0.223837	0.460756	0.718023	0.969477	0.010174	0.693314	0.864826	0.976744	0.988372	0.524709	0.378457	0.002907	0.232558	0.489826	0.764535	0.986919	0.418605
0.263636	0.463636	0.272727	0.146789	0.201835	0.211009	0.245455	0.436364	0.645455	0.790909	0.918182	0.018182	0.127273	0.309091	0.590909	1	0.009091	0.318182	0.536364	0.772727	0.954545	0.509091	0.036364	0.454545	0.018349	0.073394	0	0.009091	0.127273	0.263636	0.445455	1	0.309091	0.309091	0.318182	0.327273	0.336364	0.227273	0.536364	0.654545	0.763636	0.936364	0.372727	0.440367	0.118182	0.345455	0.536364	0.718182	0.954545	0.481818
0.349754	0.315271	0.334975	0.207921	0.227723	0.237624	0.014778	0.310345	0.517241	0.773399	0.985222	0.039409	0.197044	0.46798	0.738916	0.995074	0.004926	0.206897	0.433498	0.699507	1	0.280788	0.1133	0.605911	0.049505	0.118812	0.009901	0.004926	0.147783	0.37931	0.743842	1	0.019704	0.039409	0.566502	0.660099	0.990148	0.083744	0.285714	0.482759	0.773399	0.975369	0.546798	0.425743	0.009852	0.172414	0.458128	0.674877	0.995074	0.295567
0.387283	0.352601	0.260116	0.226744	0.232558	0.203488	0.017341	0.32948	0.566474	0.768786	1	0.023121	0.16185	0.445087	0.786127	0.971098	0.00578	0.236994	0.462428	0.635838	0.976879	0.300578	0	0.699422	0	0.104651	0	0.00578	0.242775	0.606936	0.716763	1	0	0	0	0	0	0.034682	0.254335	0.485549	0.745665	0.947977	0.387283	0.453488	0.034682	0.231214	0.404624	0.693642	0.976879	0.369942
0.08	0.5	0.42	0.081633	0.081633	0.326531	0.04	0.04	0.42	0.66	0.9	0.06	0.36	0.52	0.64	0.94	0.02	0.16	0.3	0.74	1	0.6	0.12	0.28	0.081633	0.040816	0	0.02	0.42	0.58	0.82	1	0.7	0.7	0.74	0.76	0.96	0.04	0.08	0.16	0.22	0.3	0.64	0.326531	0.08	0.22	0.38	0.74	0.96	0.52
0.314759	0.326807	0.358434	0.177979	0.220211	0.245852	0.006024	0.246988	0.501506	0.756024	0.990964	0.003012	0.222892	0.465361	0.716867	1	0.001506	0.260542	0.50753	0.774096	0.998494	0.521084	0.302711	0.176205	0.117647	0.054299	0.00905	0.001506	0.243976	0.513554	0.728916	1	0.009036	0.162651	0.358434	0.539157	0.993976	0.158133	0.53012	0.75	0.832831	0.963855	0.588855	0.349925	0.00753	0.274096	0.506024	0.736446	0.993976	0.375
0.341947	0.319552	0.338501	0.208962	0.228781	0.214132	0.002153	0.253661	0.5	0.737295	0.997416	0.001292	0.267873	0.510336	0.764427	0.999139	0.000431	0.22739	0.481051	0.742033	1	0.323859	0.068045	0.608096	0.02542	0.08143	0.003016	0.000431	0.253661	0.501292	0.770457	1	0.033592	0.121016	0.472007	0.757967	0.972007	0.003876	0.255383	0.507321	0.72093	0.996985	0.550388	0.401551	0.003876	0.243755	0.495693	0.75323	0.998277	0.333333
0.355556	0.340741	0.303704	0.246269	0.216418	0.216418	0.133333	0.325926	0.518519	0.725926	0.933333	0.014815	0.207407	0.459259	0.77037	0.992593	0.007407	0.125926	0.451852	0.718519	1	0.622222	0.022222	0.355556	0.014925	0.074627	0	0.007407	0.385185	0.540741	0.822222	1	0.903704	0.903704	0.903704	0.911111	0.918519	0.051852	0.133333	0.274074	0.674074	0.792593	0.42963	0.328358	0.037037	0.140741	0.540741	0.874074	0.985185	0.4
0.302817	0.330986	0.366197	0.229682	0.173145	0.261484	0.014085	0.323944	0.566901	0.75	0.982394	0.007042	0.239437	0.524648	0.757042	1	0.003521	0.211268	0.401408	0.700704	0.996479	0.521127	0.211268	0.267606	0.095406	0.031802	0.003534	0.003521	0.40493	0.633803	0.816901	1	0.299296	0.461268	0.556338	0.778169	0.985915	0.014085	0.077465	0.144366	0.242958	0.894366	0.545775	0.289753	0.017606	0.257042	0.464789	0.785211	0.996479	0.338028
0.444444	0.240741	0.314815	0.273292	0.26087	0.136646	0.012346	0.265432	0.444444	0.623457	0.993827	0.030864	0.240741	0.506173	0.734568	0.962963	0.006173	0.179012	0.635802	0.82716	1	0.462963	0.265432	0.271605	0.10559	0.043478	0.006211	0.006173	0.401235	0.518519	0.722222	1	0.030864	0.635802	0.746914	0.845679	0.950617	0.061728	0.123457	0.277778	0.345679	0.987654	0.41358	0.385093	0.018519	0.209877	0.660494	0.833333	0.981481	0.271605
0.260317	0.406349	0.333333	0.219745	0.165605	0.283439	0.015873	0.311111	0.580952	0.793651	1	0.006349	0.250794	0.495238	0.707937	0.996825	0.003175	0.219048	0.447619	0.704762	0.993651	0.438095	0.152381	0.409524	0.117834	0.105096	0.009554	0.003175	0.349206	0.622222	0.822222	1	0.126984	0.234921	0.384127	0.555556	0.914286	0.015873	0.174603	0.447619	0.660317	0.977778	0.622222	0.350318	0.009524	0.228571	0.479365	0.733333	0.990476	0.431746
0.367935	0.3391	0.292964	0.210162	0.224018	0.193995	0.00346	0.264129	0.486736	0.701269	0.998847	0.002307	0.265283	0.573241	0.866205	0.997693	0.001153	0.200692	0.463668	0.678201	1	0.434833	0.114187	0.45098	0.048499	0.060046	0	0.001153	0.239908	0.615917	0.885813	1	0.038062	0.155709	0.599769	0.651672	0.981546	0.004614	0.305652	0.454441	0.707036	0.8812	0.468281	0.394919	0.005767	0.215686	0.452134	0.677047	0.983852	0.369089
0.236769	0.356546	0.406685	0.167598	0.164804	0.290503	0.011142	0.348189	0.604457	0.860724	1	0.005571	0.264624	0.529248	0.774373	0.994429	0.002786	0.194986	0.392758	0.657382	0.97493	0.362117	0.027855	0.610028	0.013966	0.047486	0.002793	0.002786	0.356546	0.724234	0.908078	1	0.325905	0.328691	0.337047	0.431755	0.888579	0.038997	0.194986	0.415042	0.657382	0.844011	0.649025	0.189944	0.036212	0.231198	0.417827	0.674095	0.983287	0.373259
0.303523	0.344173	0.352304	0.184783	0.203804	0.25	0.00813	0.243902	0.547425	0.799458	1	0.00542	0.262873	0.433604	0.693767	0.99187	0.00271	0.230352	0.525745	0.764228	0.98645	0.311653	0.170732	0.517615	0.057065	0.089674	0.002717	0.00271	0.200542	0.441734	0.783198	1	0.01084	0.119241	0.349593	0.433604	0.943089	0.073171	0.319783	0.574526	0.753388	0.99458	0.628726	0.369565	0.01084	0.298103	0.468835	0.701897	0.98645	0.349593
0.411765	0.278431	0.309804	0.220472	0.259843	0.161417	0.007843	0.286275	0.54902	0.760784	0.996078	0.027451	0.196078	0.439216	0.72549	1	0.003922	0.215686	0.415686	0.670588	0.984314	0.345098	0.094118	0.560784	0.03937	0.086614	0	0.003922	0.282353	0.541176	0.682353	1	0.011765	0.12549	0.298039	0.407843	0.596078	0.054902	0.247059	0.517647	0.823529	0.984314	0.466667	0.409449	0.011765	0.172549	0.396078	0.662745	0.984314	0.333333
0.269784	0.413669	0.316547	0.180505	0.176895	0.259928	0.014388	0.233813	0.492806	0.730216	1	0.007194	0.291367	0.532374	0.755396	0.996403	0.003597	0.21223	0.442446	0.751799	0.989209	0.395683	0.201439	0.402878	0.079422	0.079422	0.00722	0.003597	0.183453	0.52518	0.834532	1	0.107914	0.190647	0.352518	0.571942	0.992806	0.021583	0.298561	0.482014	0.733813	0.956835	0.622302	0.33213	0.028777	0.251799	0.47482	0.726619	0.992806	0.442446
0.257453	0.525745	0.216802	0.30163	0.095109	0.258152	0.01626	0.241192	0.504065	0.777778	0.99458	0.00542	0.252033	0.493225	0.728997	0.99729	0.00271	0.230352	0.476965	0.766938	1	0.452575	0.121951	0.425474	0.048913	0.092391	0.005435	0.00271	0.186992	0.436314	0.688347	1	0.051491	0.154472	0.224932	0.769648	0.95935	0.065041	0.314363	0.566396	0.739837	0.99729	0.552846	0.396739	0.04336	0.252033	0.476965	0.728997	0.98916	0.604336
0.366743	0.343964	0.289294	0.251142	0.251142	0.189498	0.004556	0.232346	0.448747	0.697039	0.997722	0.009112	0.275626	0.560364	0.81549	1	0.002278	0.202733	0.455581	0.70615	0.995444	0.47836	0.193622	0.328018	0.089041	0.057078	0.006849	0.002278	0.257403	0.56492	0.824601	1	0.047836	0.548975	0.685649	0.810934	0.986333	0.013667	0.182232	0.334852	0.419134	0.851936	0.482916	0.438356	0.006834	0.273349	0.583144	0.806378	0.995444	0.353075
0.26045	0.379421	0.360129	0.225806	0.154839	0.277419	0.006431	0.221865	0.469453	0.694534	0.993569	0.012862	0.254019	0.491961	0.768489	0.990354	0.003215	0.282958	0.514469	0.758842	1	0.414791	0.045016	0.540193	0.029032	0.054839	0.003226	0.003215	0.192926	0.491961	0.717042	1	0.028939	0.03537	0.215434	0.569132	0.581994	0.106109	0.327974	0.514469	0.758842	0.942122	0.688103	0.206452	0.012862	0.286174	0.491961	0.733119	0.993569	0.376206
0.289898	0.366032	0.34407	0.199413	0.18915	0.217009	0.002928	0.248902	0.515373	0.718887	1	0.004392	0.254758	0.468521	0.77306	0.998536	0.001464	0.243045	0.491947	0.734993	0.995608	0.513909	0.146413	0.339678	0.068915	0.057185	0.007331	0.001464	0.267936	0.494876	0.761347	1	0.005857	0.213763	0.427526	0.720351	0.995608	0.014641	0.245974	0.518302	0.781845	0.928258	0.572474	0.296188	0.004392	0.215227	0.534407	0.746706	0.995608	0.399707
0.27533	0.414097	0.310573	0.196468	0.189845	0.240618	0.004405	0.231278	0.475771	0.748899	1	0.008811	0.26652	0.537445	0.781938	0.997797	0.002203	0.229075	0.462555	0.704846	0.993392	0.57489	0.42511	0	0.163355	0	0	0.002203	0.279736	0.572687	0.828194	1	0.030837	0.222467	0.427313	0.647577	0.995595	0	0	0	0	0	0.623348	0.317881	0.006608	0.270925	0.504405	0.762115	0.995595	0.438326
0.254545	0.495455	0.25	0.242009	0.141553	0.191781	0.090909	0.372727	0.495455	0.690909	0.995455	0.009091	0.2	0.481818	0.786364	1	0.004545	0.195455	0.513636	0.713636	0.977273	0.604545	0.25	0.145455	0.073059	0.027397	0.009132	0.004545	0.254545	0.559091	0.818182	1	0.195455	0.295455	0.568182	0.659091	0.877273	0.018182	0.05	0.086364	0.368182	0.427273	0.468182	0.319635	0.022727	0.159091	0.354545	0.636364	0.977273	0.5
0.297082	0.3687	0.334218	0.191489	0.18617	0.236702	0.01061	0.246684	0.469496	0.761273	0.997347	0.005305	0.198939	0.493369	0.708223	1	0.002653	0.29443	0.519894	0.748011	0.986737	0.437666	0.27321	0.289125	0.095745	0.069149	0	0.002653	0.177719	0.480106	0.724138	1	0.055703	0.262599	0.554377	0.875332	0.98939	0.034483	0.275862	0.450928	0.665782	0.779841	0.66313	0.292553	0.007958	0.281167	0.527851	0.758621	0.98939	0.3687
0.30754	0.327381	0.365079	0.194831	0.206759	0.260437	0.003968	0.285714	0.519841	0.751984	0.988095	0.009921	0.236111	0.509921	0.732143	1	0.001984	0.21627	0.468254	0.748016	0.994048	0.406746	0.103175	0.490079	0.053678	0.081511	0.00994	0.001984	0.242063	0.525794	0.825397	1	0.09127	0.238095	0.742063	0.785714	0.984127	0.007937	0.25	0.484127	0.642857	0.918651	0.625	0.345924	0.005952	0.232143	0.460317	0.734127	0.994048	0.331349
0.248996	0.363454	0.38755	0.171026	0.183099	0.251509	0.006024	0.190763	0.485944	0.684739	0.98996	0.004016	0.174699	0.439759	0.759036	0.997992	0.002008	0.309237	0.570281	0.773092	1	0.321285	0.032129	0.646586	0.014085	0.074447	0.01006	0.002008	0.104418	0.267068	0.558233	1	0.042169	0.148594	0.534137	0.548193	0.96988	0.054217	0.353414	0.600402	0.793173	0.985944	0.706827	0.189135	0.014056	0.327309	0.576305	0.779116	0.991968	0.35743
0.347826	0.286957	0.365217	0.236842	0.201754	0.175439	0.017391	0.226087	0.434783	0.73913	0.991304	0.078261	0.452174	0.643478	0.843478	1	0.008696	0.173913	0.382609	0.617391	0.895652	0.469565	0.226087	0.304348	0.078947	0.061404	0.008772	0.008696	0.278261	0.46087	0.730435	1	0.026087	0.217391	0.408696	0.686957	0.791304	0.034783	0.113043	0.530435	0.843478	0.921739	0.373913	0.45614	0.026087	0.13913	0.33913	0.565217	0.895652	0.321739
0.31291	0.297593	0.389497	0.173246	0.267544	0.256579	0.004376	0.196937	0.520788	0.781182	1	0.008753	0.293217	0.496718	0.704595	0.995624	0.002188	0.218818	0.4814	0.752735	0.997812	0.483589	0	0.516411	0	0.127193	0	0.002188	0.221007	0.4814	0.741794	1	0	0	0	0	0	0.021882	0.269147	0.512035	0.754923	0.986871	0.586433	0.381579	0.006565	0.262582	0.492341	0.733042	0.984683	0.317287
0.415385	0.292308	0.292308	0.193798	0.271318	0.20155	0.038462	0.269231	0.523077	0.746154	0.976923	0.015385	0.176923	0.453846	0.723077	1	0.007692	0.192308	0.430769	0.676923	0.953846	0.276923	0	0.723077	0	0.108527	0	0.007692	0.407692	0.723077	0.792308	1	0	0	0	0	0	0.015385	0.184615	0.430769	0.623077	0.930769	0.507692	0.403101	0.030769	0.253846	0.430769	0.623077	0.969231	0.307692
0.308244	0.422939	0.268817	0.283493	0.179426	0.254785	0.002389	0.242533	0.517324	0.751493	1	0.003584	0.270012	0.518519	0.74552	0.998805	0.001195	0.217443	0.452808	0.728793	0.995221	0.518519	0.391876	0.089606	0.126794	0.033493	0.002392	0.001195	0.252091	0.492234	0.740741	1	0.057348	0.362007	0.615293	0.783751	0.996416	0.008363	0.031063	0.129032	0.419355	0.571087	0.636798	0.291866	0.005974	0.275986	0.506571	0.744325	0.995221	0.407407
0.324324	0.341216	0.334459	0.230118	0.21489	0.247039	0.005068	0.263514	0.528716	0.777027	1	0.003378	0.238176	0.503378	0.746622	0.998311	0.001689	0.22973	0.45777	0.717905	0.993243	0.527027	0.157095	0.315878	0.067682	0.067682	0.010152	0.001689	0.219595	0.456081	0.760135	1	0.025338	0.190878	0.271959	0.508446	0.75	0.006757	0.358108	0.609797	0.800676	0.956081	0.533784	0.277496	0.006757	0.278716	0.538851	0.741554	0.983108	0.385135
0.440789	0.322368	0.236842	0.264901	0.245033	0.119205	0.013158	0.230263	0.473684	0.763158	1	0.026316	0.236842	0.486842	0.657895	0.993421	0.006579	0.25	0.5	0.703947	0.973684	0.559211	0.151316	0.289474	0.046358	0.072848	0.006623	0.006579	0.203947	0.467105	0.756579	1	0.039474	0.118421	0.230263	0.269737	0.605263	0.223684	0.447368	0.671053	0.894737	0.967105	0.361842	0.357616	0.046053	0.236842	0.447368	0.664474	0.960526	0.302632
0.356481	0.354167	0.289352	0.243337	0.208575	0.199305	0.00463	0.266204	0.49537	0.717593	0.998843	0.002315	0.259259	0.50463	0.77662	0.991898	0.001157	0.225694	0.494213	0.746528	1	0.366898	0.078704	0.554398	0.03708	0.06489	0.006952	0.001157	0.148148	0.37037	0.780093	1	0.008102	0.091435	0.224537	0.547454	0.975694	0.018519	0.376157	0.540509	0.722222	0.976852	0.491898	0.396292	0.005787	0.201389	0.461806	0.760417	0.991898	0.372685
0.234597	0.454976	0.310427	0.192399	0.144893	0.285036	0.004739	0.225118	0.490521	0.739336	0.990521	0.009479	0.293839	0.552133	0.777251	1	0.00237	0.177725	0.42891	0.718009	0.99763	0.504739	0.191943	0.303318	0.085511	0.071259	0	0.00237	0.303318	0.469194	0.701422	1	0.07109	0.151659	0.478673	0.725118	0.973934	0.004739	0.165877	0.537915	0.853081	0.995261	0.56872	0.304038	0.009479	0.317536	0.523697	0.765403	0.99763	0.485782
0.25	0.432203	0.317797	0.187234	0.187234	0.251064	0.008475	0.279661	0.466102	0.733051	0.987288	0.016949	0.216102	0.444915	0.716102	1	0.004237	0.271186	0.538136	0.779661	0.995763	0.372881	0.144068	0.483051	0.06383	0.114894	0.004255	0.004237	0.262712	0.398305	0.788136	1	0.012712	0.088983	0.275424	0.423729	0.978814	0.042373	0.377119	0.559322	0.762712	0.987288	0.614407	0.365957	0.012712	0.220339	0.491525	0.690678	0.991525	0.466102
0.242105	0.442105	0.315789	0.234043	0.191489	0.287234	0.031579	0.136842	0.431579	0.726316	0.968421	0.073684	0.263158	0.515789	0.736842	1	0.010526	0.178947	0.505263	0.694737	0.989474	0.442105	0.463158	0.094737	0.191489	0.021277	0	0.010526	0.252632	0.442105	0.652632	1	0.031579	0.157895	0.463158	0.673684	0.873684	0.905263	0.915789	0.936842	0.957895	0.989474	0.442105	0.595745	0.052632	0.273684	0.463158	0.747368	0.989474	0.431579
0.35514	0.383178	0.261682	0.245283	0.179245	0.245283	0.018692	0.392523	0.598131	0.775701	1	0.046729	0.205607	0.429907	0.738318	0.971963	0.009346	0.102804	0.345794	0.616822	0.981308	0.448598	0.11215	0.439252	0.056604	0.09434	0.018868	0.009346	0.392523	0.542056	0.831776	1	0.046729	0.065421	0.336449	0.401869	0.53271	0.028037	0.158879	0.616822	0.728972	0.915888	0.504673	0.415094	0.028037	0.149533	0.383178	0.607477	0.943925	0.383178
0.276364	0.398182	0.325455	0.204007	0.173042	0.265938	0.045455	0.296364	0.516364	0.76	1	0.003636	0.201818	0.445455	0.749091	0.996364	0.001818	0.270909	0.523636	0.725455	0.992727	0.5	0.221818	0.278182	0.080146	0.051002	0	0.001818	0.232727	0.476364	0.681818	1	0.058182	0.169091	0.490909	0.678182	0.952727	0.005455	0.347273	0.6	0.82	0.987273	0.505455	0.360656	0.007273	0.216364	0.483636	0.736364	0.990909	0.430909
0.27619	0.409524	0.314286	0.259615	0.153846	0.240385	0.057143	0.304762	0.514286	0.838095	1	0.019048	0.2	0.352381	0.733333	0.961905	0.009524	0.209524	0.571429	0.666667	0.942857	0.514286	0.07619	0.409524	0.076923	0.076923	0	0.009524	0.27619	0.457143	0.828571	1	0.219048	0.295238	0.361905	0.380952	0.771429	0.028571	0.114286	0.533333	0.638095	0.92381	0.666667	0.288462	0.028571	0.190476	0.419048	0.657143	0.952381	0.428571
0.317982	0.357456	0.324561	0.230769	0.224176	0.243956	0.008772	0.247807	0.473684	0.752193	1	0.004386	0.287281	0.572368	0.785088	0.993421	0.002193	0.203947	0.429825	0.657895	0.984649	0.532895	0.195175	0.27193	0.068132	0.063736	0.015385	0.002193	0.219298	0.567982	0.815789	1	0.008772	0.287281	0.596491	0.769737	0.934211	0.048246	0.263158	0.407895	0.539474	0.875	0.548246	0.4	0.006579	0.197368	0.436404	0.697368	0.984649	0.355263
0.328841	0.412399	0.25876	0.267568	0.172973	0.235135	0.005391	0.315364	0.514825	0.687332	1	0.013477	0.204852	0.490566	0.762803	0.997305	0.002695	0.226415	0.458221	0.757412	0.994609	0.625337	0.239892	0.134771	0.102703	0.027027	0	0.002695	0.269542	0.525606	0.722372	1	0.06469	0.253369	0.533693	0.803235	0.991914	0.008086	0.037736	0.390836	0.423181	0.954178	0.477089	0.394595	0.013477	0.22372	0.477089	0.792453	0.994609	0.431267
0.333333	0.266667	0.4	0.189189	0.189189	0.162162	0.026667	0.333333	0.52	0.746667	0.986667	0.066667	0.346667	0.533333	0.626667	0.96	0.013333	0.173333	0.32	0.693333	1	0.52	0.066667	0.413333	0.027027	0.027027	0.027027	0.013333	0.56	0.693333	0.826667	1	0.306667	0.306667	0.32	0.906667	0.933333	0.04	0.12	0.226667	0.36	0.466667	0.506667	0.378378	0.08	0.186667	0.4	0.64	0.96	0.413333
0.197183	0.383803	0.419014	0.14841	0.155477	0.325088	0.045775	0.21831	0.461268	0.757042	0.933099	0.007042	0.323944	0.549296	0.764085	0.992958	0.003521	0.200704	0.482394	0.714789	1	0.172535	0.007042	0.820423	0	0.070671	0.007067	0.003521	0.147887	0.422535	0.799296	1	0.954225	0.954225	0.954225	0.954225	0.957746	0.007042	0.25	0.507042	0.735915	0.992958	0.683099	0.261484	0.010563	0.239437	0.514085	0.714789	0.961268	0.334507
0.378099	0.328512	0.293388	0.258799	0.219462	0.180124	0.008264	0.272727	0.475207	0.727273	1	0.004132	0.229339	0.506198	0.783058	0.997934	0.002066	0.21281	0.5	0.729339	0.993802	0.419421	0.047521	0.533058	0.026915	0.084886	0.00207	0.002066	0.22314	0.535124	0.752066	1	0.076446	0.084711	0.171488	0.194215	0.863636	0.030992	0.301653	0.506198	0.762397	0.989669	0.481405	0.397516	0.006198	0.204545	0.400826	0.654959	0.985537	0.322314
0.284	0.47	0.246	0.284569	0.134269	0.228457	0.016	0.23	0.47	0.746	1	0.004	0.266	0.484	0.742	0.998	0.002	0.242	0.548	0.758	0.974	0.516	0.084	0.4	0.038076	0.082164	0.002004	0.002	0.272	0.556	0.832	1	0.02	0.248	0.326	0.64	0.976	0.062	0.218	0.456	0.66	0.92	0.576	0.40481	0.012	0.264	0.538	0.764	0.992	0.51
0.356789	0.316155	0.327056	0.210317	0.250992	0.208333	0.005946	0.233895	0.477701	0.774034	1	0.001982	0.288404	0.524281	0.749257	0.999009	0.000991	0.22894	0.488603	0.72448	0.994054	0.471754	0.120912	0.407334	0.046627	0.074405	0.008929	0.000991	0.311199	0.542121	0.73439	1	0.009911	0.104063	0.306244	0.435084	0.56888	0.063429	0.222002	0.574827	0.880079	0.994054	0.503469	0.426587	0.007929	0.257681	0.482656	0.675917	0.992071	0.334985
0.246914	0.382716	0.37037	0.1875	0.15	0.2625	0.123457	0.481481	0.666667	0.91358	1	0.024691	0.111111	0.530864	0.765432	0.987654	0.012346	0.197531	0.333333	0.469136	0.888889	0.37037	0.037037	0.592593	0	0.05	0.025	0.012346	0.518519	0.814815	0.901235	1	0.382716	0.382716	0.382716	0.395062	0.407407	0.024691	0.160494	0.308642	0.641975	0.790123	0.580247	0.325	0.049383	0.209877	0.382716	0.641975	0.888889	0.345679
0.420408	0.326531	0.253061	0.237705	0.209016	0.204918	0.012245	0.257143	0.583673	0.816327	1	0.008163	0.2	0.42449	0.697959	0.991837	0.004082	0.261224	0.526531	0.693878	0.963265	0.326531	0.204082	0.469388	0.057377	0.106557	0.008197	0.004082	0.163265	0.481633	0.685714	1	0.326531	0.383673	0.55102	0.706122	0.844898	0.016327	0.2	0.461224	0.755102	0.991837	0.481633	0.393443	0.020408	0.342857	0.497959	0.718367	0.987755	0.367347
0.211401	0.382423	0.406176	0.188095	0.133333	0.288095	0.007126	0.325416	0.591449	0.864608	1	0.004751	0.228029	0.463183	0.743468	0.995249	0.002375	0.230404	0.456057	0.67696	0.997625	0.391924	0.052257	0.555819	0.019048	0.047619	0.004762	0.002375	0.356295	0.781473	0.88361	1	0.014252	0.334917	0.422803	0.446556	0.909739	0.085511	0.220903	0.401425	0.617577	0.931116	0.622328	0.2	0.009501	0.232779	0.415677	0.650831	0.997625	0.410926
0.28125	0.375	0.34375	0.210762	0.210762	0.269058	0.013393	0.308036	0.495536	0.776786	0.995536	0.008929	0.191964	0.446429	0.732143	1	0.004464	0.254464	0.535714	0.75	0.991071	0.508929	0.321429	0.169643	0.09417	0.067265	0.004484	0.004464	0.183036	0.486607	0.754464	1	0.205357	0.303571	0.424107	0.714286	0.982143	0.044643	0.080357	0.620536	0.691964	0.866071	0.575893	0.367713	0.03125	0.223214	0.504464	0.758929	0.986607	0.375
0.248718	0.305128	0.446154	0.169666	0.215938	0.262211	0.007692	0.271795	0.510256	0.782051	0.997436	0.005128	0.212821	0.484615	0.702564	0.987179	0.002564	0.233333	0.479487	0.75641	1	0.107692	0.074359	0.817949	0.017995	0.043702	0.007712	0.002564	0.158974	0.715385	0.902564	1	0.051282	0.066667	0.561538	0.925641	0.989744	0.007692	0.251282	0.458974	0.692308	0.992308	0.741026	0.277635	0.010256	0.235897	0.464103	0.733333	0.992308	0.287179
0.248424	0.411097	0.340479	0.20202	0.136364	0.282828	0.006305	0.247163	0.568726	0.791929	0.998739	0.002522	0.21942	0.474149	0.760404	0.997478	0.001261	0.283733	0.485498	0.688525	1	0.501892	0.064313	0.433796	0.030303	0.060606	0	0.001261	0.177806	0.455233	0.828499	1	0.042875	0.491803	0.746532	0.769231	0.929382	0.016393	0.325347	0.481715	0.655738	0.992434	0.562421	0.353535	0.008827	0.293821	0.479193	0.680958	0.994956	0.431274
0.371622	0.243243	0.385135	0.163265	0.292517	0.204082	0.013514	0.189189	0.513514	0.743243	1	0.027027	0.351351	0.554054	0.756757	0.966216	0.006757	0.209459	0.412162	0.689189	0.986486	0.493243	0.324324	0.182432	0.129252	0.047619	0.006803	0.006757	0.182432	0.405405	0.743243	1	0.135135	0.256757	0.695946	0.871622	0.986486	0.040541	0.439189	0.547297	0.608108	0.655405	0.554054	0.408163	0.02027	0.263514	0.506757	0.777027	0.986486	0.25
0.491124	0.272189	0.236686	0.303571	0.238095	0.125	0.029586	0.260355	0.508876	0.727811	1	0.011834	0.201183	0.449704	0.745562	0.988166	0.005917	0.242604	0.455621	0.804734	0.976331	0.331361	0.023669	0.64497	0.047619	0.083333	0	0.005917	0.230769	0.633136	0.846154	1	0.153846	0.153846	0.366864	0.668639	0.881657	0.029586	0.272189	0.485207	0.698225	0.952663	0.420118	0.5	0.011834	0.224852	0.431953	0.704142	0.976331	0.331361
0.304348	0.355072	0.34058	0.262774	0.189781	0.277372	0.021739	0.15942	0.391304	0.688406	0.963768	0.014493	0.26087	0.528986	0.797101	0.985507	0.007246	0.217391	0.557971	0.724638	1	0.318841	0.101449	0.57971	0.029197	0.145985	0	0.007246	0.253623	0.362319	0.65942	1	0.391304	0.405797	0.434783	0.485507	0.514493	0.036232	0.202899	0.615942	0.826087	0.992754	0.507246	0.394161	0.028986	0.347826	0.528986	0.681159	0.971014	0.384058
0.303571	0.357143	0.339286	0.252252	0.216216	0.27027	0.026786	0.294643	0.517857	0.794643	0.973214	0.080357	0.285714	0.508929	0.75	0.991071	0.008929	0.098214	0.410714	0.678571	1	0.669643	0.098214	0.232143	0.063063	0.045045	0.009009	0.008929	0.410714	0.633929	0.830357	1	0.241071	0.25	0.553571	0.625	0.776786	0.026786	0.071429	0.133929	0.223214	0.339286	0.4375	0.414414	0.035714	0.133929	0.357143	0.616071	0.910714	0.419643
0.36859	0.294872	0.336538	0.192926	0.270096	0.196141	0.00641	0.224359	0.442308	0.75	0.990385	0.022436	0.266026	0.50641	0.717949	1	0.003205	0.259615	0.525641	0.775641	0.99359	0.387821	0.230769	0.38141	0.086817	0.061093	0.003215	0.003205	0.198718	0.439103	0.657051	1	0.009615	0.214744	0.564103	0.858974	0.990385	0.038462	0.266026	0.541667	0.794872	0.923077	0.557692	0.385852	0.009615	0.307692	0.522436	0.75641	0.983974	0.307692
0.34	0.3425	0.3175	0.192982	0.223058	0.240602	0.0075	0.2275	0.44	0.685	0.99	0.02	0.2725	0.565	0.7475	1	0.0025	0.2475	0.5	0.78	0.9975	0.57	0.245	0.185	0.102757	0.037594	0.002506	0.0025	0.2525	0.54	0.7325	1	0.2825	0.4175	0.5525	0.77	0.9875	0.0075	0.0775	0.17	0.525	0.89	0.485	0.270677	0.005	0.2775	0.515	0.7975	0.9975	0.355
0.346154	0.346154	0.307692	0.300971	0.174757	0.242718	0.057692	0.211538	0.5	0.759615	1	0.019231	0.201923	0.413462	0.740385	0.980769	0.009615	0.288462	0.567308	0.711538	0.932692	0.346154	0.288462	0.365385	0.097087	0.07767	0.019417	0.009615	0.346154	0.519231	0.75	1	0.028846	0.557692	0.673077	0.769231	0.942308	0.057692	0.134615	0.259615	0.394231	0.923077	0.490385	0.466019	0.028846	0.25	0.557692	0.711538	0.942308	0.288462
0.244147	0.471572	0.284281	0.214765	0.14094	0.234899	0.006689	0.304348	0.528428	0.732441	0.993311	0.013378	0.254181	0.458194	0.729097	0.986622	0.003344	0.22408	0.491639	0.826087	1	0.488294	0.177258	0.334448	0.080537	0.09396	0	0.003344	0.217391	0.494983	0.70903	1	0.414716	0.481605	0.608696	0.662207	0.886288	0.013378	0.12709	0.361204	0.876254	0.976589	0.635452	0.281879	0.010033	0.35786	0.575251	0.80602	0.983278	0.494983
0.259155	0.371831	0.369014	0.206215	0.144068	0.240113	0.008451	0.152113	0.484507	0.839437	0.994366	0.03662	0.256338	0.473239	0.743662	0.997183	0.002817	0.259155	0.535211	0.721127	1	0.490141	0.050704	0.459155	0.028249	0.056497	0	0.002817	0.180282	0.464789	0.83662	1	0.166197	0.174648	0.476056	0.487324	0.971831	0.005634	0.264789	0.549296	0.71831	0.901408	0.619718	0.20904	0.005634	0.247887	0.521127	0.71831	0.991549	0.343662
0.248276	0.37931	0.372414	0.173611	0.173611	0.347222	0.103448	0.296552	0.606897	0.848276	0.986207	0.027586	0.213793	0.455172	0.675862	1	0.006897	0.2	0.510345	0.765517	0.993103	0.468966	0.482759	0.048276	0.152778	0.013889	0.013889	0.006897	0.255172	0.531034	0.689655	1	0.034483	0.324138	0.510345	0.841379	0.993103	0.02069	0.02069	0.062069	0.075862	0.089655	0.441379	0.569444	0.013793	0.151724	0.496552	0.765517	0.993103	0.434483
0.245833	0.479167	0.275	0.1841	0.1841	0.251046	0.008333	0.291667	0.570833	0.825	0.995833	0.0125	0.204167	0.466667	0.683333	0.991667	0.004167	0.195833	0.479167	0.770833	1	0.55	0.379167	0.070833	0.100418	0.008368	0	0.004167	0.245833	0.479167	0.729167	1	0.158333	0.408333	0.616667	0.804167	0.995833	0.0125	0.025	0.041667	0.058333	0.079167	0.708333	0.276151	0.0125	0.216667	0.4875	0.725	0.991667	0.479167
0.335821	0.376866	0.287313	0.265918	0.217228	0.235955	0.007463	0.287313	0.529851	0.764925	1	0.029851	0.179104	0.462687	0.75	0.996269	0.003731	0.25	0.473881	0.682836	0.966418	0.354478	0.201493	0.44403	0.108614	0.093633	0.003745	0.003731	0.358209	0.514925	0.798507	1	0.141791	0.287313	0.473881	0.645522	0.850746	0.007463	0.115672	0.414179	0.735075	0.962687	0.537313	0.389513	0.011194	0.227612	0.447761	0.708955	0.981343	0.429104
0.34697	0.348485	0.304545	0.229135	0.210926	0.229135	0.006061	0.209091	0.465152	0.734848	0.99697	0.00303	0.281818	0.515152	0.74697	0.998485	0.001515	0.245455	0.492424	0.754545	1	0.412121	0.242424	0.345455	0.104704	0.062215	0.007587	0.001515	0.254545	0.478788	0.721212	1	0.034848	0.237879	0.543939	0.759091	0.966667	0.013636	0.206061	0.481818	0.815152	0.989394	0.574242	0.364188	0.009091	0.271212	0.498485	0.734848	0.986364	0.343939
0.228883	0.524069	0.247048	0.263636	0.12	0.266364	0.003633	0.303361	0.498638	0.736603	0.999092	0.002725	0.238874	0.496821	0.755677	1	0.000908	0.233424	0.503179	0.746594	0.995459	0.529519	0.248865	0.221617	0.103636	0.034545	0.001818	0.000908	0.266122	0.497729	0.773842	1	0.044505	0.160763	0.28792	0.745686	0.995459	0.009083	0.483197	0.590372	0.707539	0.993642	0.586739	0.347273	0.008174	0.277021	0.514078	0.742961	0.99455	0.543143
0.213636	0.360606	0.425758	0.159332	0.151745	0.326252	0.004545	0.278788	0.524242	0.807576	1	0.024242	0.254545	0.501515	0.727273	0.990909	0.001515	0.228788	0.481818	0.712121	0.99697	0.263636	0.048485	0.687879	0.033384	0.084977	0	0.001515	0.327273	0.606061	0.787879	1	0.206061	0.292424	0.618182	0.69697	0.9	0.00303	0.228788	0.456061	0.748485	0.986364	0.706061	0.254932	0.007576	0.260606	0.478788	0.704545	0.993939	0.362121
0.279279	0.396396	0.324324	0.172727	0.145455	0.263636	0.198198	0.36036	0.531532	0.747748	1	0.018018	0.234234	0.513514	0.846847	0.981982	0.009009	0.135135	0.369369	0.612613	0.972973	0.81982	0.018018	0.162162	0.018182	0.018182	0	0.009009	0.36036	0.567568	0.774775	1	0.873874	0.873874	0.873874	0.873874	0.882883	0.054054	0.081081	0.126126	0.162162	0.207207	0.369369	0.290909	0.036036	0.117117	0.207207	0.558559	0.972973	0.513514
0.404762	0.27381	0.321429	0.228916	0.26506	0.180723	0.071429	0.22619	0.440476	0.678571	1	0.02381	0.095238	0.5	0.75	0.97619	0.011905	0.214286	0.511905	0.77381	0.928571	0.27381	0.083333	0.642857	0.036145	0.13253	0.012048	0.011905	0.285714	0.452381	0.821429	1	0.702381	0.702381	0.880952	0.904762	0.928571	0.047619	0.190476	0.440476	0.619048	0.97619	0.416667	0.433735	0.059524	0.27381	0.559524	0.77381	0.964286	0.345238
0.358369	0.412017	0.229614	0.277419	0.195699	0.15914	0.008584	0.270386	0.542918	0.824034	0.982833	0.004292	0.263948	0.51073	0.690987	1	0.002146	0.214592	0.418455	0.682403	0.991416	0.633047	0.171674	0.195279	0.068817	0.03871	0.012903	0.002146	0.270386	0.534335	0.746781	1	0.06867	0.186695	0.334764	0.416309	0.991416	0.030043	0.240343	0.7103	0.849785	0.976395	0.390558	0.391398	0.025751	0.23176	0.437768	0.7103	0.993562	0.414163
0.272025	0.391036	0.33694	0.22291	0.201238	0.273994	0.004637	0.247295	0.497682	0.741886	0.992272	0.007728	0.278207	0.510046	0.746522	1	0.001546	0.217929	0.472952	0.757342	0.998454	0.542504	0.247295	0.210201	0.100619	0.041796	0.001548	0.001546	0.352396	0.565688	0.803709	1	0.049459	0.230294	0.650696	0.789799	0.990726	0.004637	0.111283	0.258114	0.454405	0.941267	0.632148	0.346749	0.006182	0.225657	0.479134	0.734158	0.990726	0.384853
0.3	0.385246	0.314754	0.197044	0.213465	0.262726	0.008197	0.209836	0.460656	0.737705	0.998361	0.003279	0.268852	0.529508	0.72623	0.995082	0.001639	0.27541	0.509836	0.77377	1	0.493443	0.170492	0.336066	0.065681	0.078818	0.019704	0.001639	0.318033	0.547541	0.716393	1	0.145902	0.336066	0.480328	0.72623	0.993443	0.018033	0.201639	0.35082	0.763934	0.945902	0.531148	0.400657	0.006557	0.283607	0.496721	0.74918	0.995082	0.429508
0.321637	0.368421	0.309942	0.170588	0.194118	0.252941	0.02924	0.298246	0.584795	0.80117	0.994152	0.011696	0.187135	0.450292	0.660819	0.964912	0.005848	0.210526	0.432749	0.748538	1	0.397661	0.19883	0.403509	0.076471	0.076471	0.041176	0.005848	0.192982	0.362573	0.783626	1	0.046784	0.152047	0.309942	0.853801	0.994152	0.070175	0.409357	0.526316	0.625731	0.877193	0.51462	0.458824	0.023392	0.204678	0.438596	0.695906	0.982456	0.426901
0.312661	0.346253	0.341085	0.194301	0.251295	0.194301	0.005168	0.258398	0.501292	0.72093	0.989664	0.007752	0.268734	0.50646	0.754522	0.992248	0.002584	0.229974	0.478036	0.739018	1	0.581395	0.403101	0.015504	0.150259	0.010363	0	0.002584	0.25323	0.475452	0.73385	1	0.074935	0.317829	0.529716	0.770026	0.997416	0.020672	0.020672	0.02584	0.028424	0.286822	0.633075	0.326425	0.010336	0.27907	0.529716	0.751938	0.994832	0.413437
0.28483	0.489164	0.226006	0.265116	0.124031	0.175194	0.003096	0.260062	0.512384	0.76935	1	0.006192	0.229102	0.455108	0.701238	0.996904	0.001548	0.272446	0.577399	0.755418	0.993808	0.695046	0.091331	0.213622	0.035659	0.057364	0.007752	0.001548	0.229102	0.472136	0.794118	1	0.01548	0.309598	0.568111	0.613003	0.893189	0.089783	0.275542	0.685759	0.747678	0.99226	0.43808	0.334884	0.009288	0.263158	0.572755	0.772446	0.993808	0.532508
0.317269	0.349398	0.333333	0.209677	0.205645	0.25	0.028112	0.188755	0.522088	0.795181	1	0.008032	0.257028	0.48996	0.674699	0.995984	0.004016	0.248996	0.477912	0.722892	0.987952	0.317269	0.156627	0.526104	0.068548	0.100806	0.004032	0.004016	0.228916	0.48996	0.658635	1	0.024096	0.068273	0.24498	0.421687	0.718876	0.092369	0.333333	0.634538	0.835341	0.991968	0.630522	0.346774	0.024096	0.261044	0.48996	0.698795	0.991968	0.333333
0.275229	0.449541	0.275229	0.267281	0.133641	0.239631	0.009174	0.284404	0.495413	0.788991	1	0.013761	0.233945	0.5	0.738532	0.990826	0.004587	0.243119	0.43578	0.711009	0.986239	0.522936	0.243119	0.233945	0.096774	0.050691	0.004608	0.004587	0.220183	0.504587	0.678899	1	0.055046	0.243119	0.62844	0.784404	0.894495	0.105505	0.279817	0.353211	0.931193	0.990826	0.582569	0.387097	0.013761	0.247706	0.5	0.738532	0.986239	0.5
0.342569	0.440806	0.216625	0.305556	0.174242	0.189394	0.010076	0.2267	0.493703	0.780856	0.989924	0.005038	0.264484	0.498741	0.697733	0.997481	0.002519	0.216625	0.501259	0.778338	1	0.717884	0.030227	0.251889	0.017677	0.068182	0.007576	0.002519	0.239295	0.450882	0.690176	1	0.062972	0.06801	0.196474	0.528967	0.93199	0.012594	0.319899	0.629723	0.808564	0.97733	0.342569	0.363636	0.015113	0.299748	0.531486	0.823678	0.97733	0.476071
0.385399	0.29202	0.322581	0.185374	0.268707	0.205782	0.003396	0.24618	0.531409	0.758913	1	0.010187	0.232598	0.444822	0.733447	0.996604	0.001698	0.252971	0.514431	0.747029	0.986418	0.380306	0.256367	0.363328	0.103741	0.062925	0.008503	0.001698	0.225806	0.451613	0.702886	1	0.010187	0.242784	0.560272	0.765705	0.972835	0.023769	0.303905	0.49236	0.803056	0.994907	0.587436	0.346939	0.01528	0.271647	0.511036	0.736842	0.993209	0.281834
0.342857	0.47619	0.180952	0.282297	0.119617	0.167464	0.019048	0.280952	0.452381	0.738095	0.985714	0.014286	0.271429	0.580952	0.761905	0.995238	0.004762	0.157143	0.328571	0.547619	1	0.709524	0.061905	0.228571	0.033493	0.07177	0.014354	0.004762	0.309524	0.538095	0.738095	1	0.02381	0.166667	0.390476	0.780952	0.8	0.071429	0.22381	0.380952	0.657143	0.971429	0.247619	0.325359	0.02381	0.228571	0.390476	0.657143	0.957143	0.471429
0.278481	0.386076	0.335443	0.210191	0.197452	0.229299	0.012658	0.253165	0.43038	0.677215	0.955696	0.018987	0.240506	0.575949	0.772152	1	0.006329	0.164557	0.474684	0.651899	0.987342	0.221519	0	0.778481	0	0.101911	0	0.006329	0.234177	0.443038	0.734177	1	0	0	0	0	0	0.012658	0.253165	0.506329	0.746835	0.987342	0.493671	0.44586	0.018987	0.183544	0.481013	0.727848	0.987342	0.449367
0.30669	0.329279	0.364031	0.189565	0.207826	0.24	0.008688	0.254561	0.506516	0.738488	1	0.002606	0.245004	0.483058	0.750652	0.995656	0.000869	0.24066	0.508254	0.753258	0.999131	0.295395	0.025195	0.679409	0.014783	0.089565	0.00087	0.000869	0.246742	0.457863	0.711555	1	0.222415	0.31364	0.491746	0.754127	0.998262	0.001738	0.251955	0.542137	0.761077	0.993918	0.591659	0.382609	0.005213	0.284101	0.529974	0.748914	0.997394	0.345786
0.354651	0.319767	0.325581	0.222222	0.245614	0.181287	0.017442	0.244186	0.488372	0.709302	0.982558	0.011628	0.19186	0.447674	0.755814	1	0.005814	0.290698	0.517442	0.738372	0.994186	0.44186	0.127907	0.430233	0.064327	0.087719	0.017544	0.005814	0.232558	0.52907	0.72093	1	0.360465	0.511628	0.593023	0.75	0.906977	0.05814	0.203488	0.406977	0.686047	0.988372	0.465116	0.444444	0.023256	0.30814	0.52907	0.75	0.976744	0.337209
0.286528	0.499051	0.214421	0.262357	0.152091	0.180608	0.003795	0.248577	0.43833	0.759013	0.99241	0.009488	0.208729	0.491461	0.757116	1	0.001898	0.318786	0.542694	0.690702	0.994307	0.745731	0.142315	0.111954	0.070342	0.036122	0.005703	0.001898	0.212524	0.462998	0.749526	1	0.072106	0.358634	0.56926	0.688805	0.994307	0.134725	0.343454	0.660342	0.721063	0.886148	0.461101	0.277567	0.00759	0.314991	0.542694	0.70019	0.994307	0.523719
0.30695	0.359073	0.333977	0.220503	0.197292	0.263056	0.015444	0.272201	0.542471	0.766409	0.998069	0.003861	0.241313	0.519305	0.76834	0.994208	0.001931	0.216216	0.438224	0.675676	1	0.482625	0.148649	0.368726	0.056093	0.083172	0.005803	0.001931	0.281853	0.544402	0.737452	1	0.005792	0.216216	0.436293	0.604247	0.96332	0.046332	0.181467	0.401544	0.835907	0.944015	0.583012	0.394584	0.005792	0.225869	0.471042	0.698842	0.984556	0.391892
0.318328	0.353698	0.327974	0.235484	0.196774	0.219355	0.006431	0.241158	0.463023	0.729904	0.993569	0.012862	0.247588	0.543408	0.742765	1	0.003215	0.234727	0.501608	0.755627	0.996785	0.241158	0	0.758842	0	0.129032	0	0.003215	0.241158	0.4791	0.678457	1	0	0	0	0	0	0.012862	0.250804	0.517685	0.765273	0.987138	0.5209	0.419355	0.012862	0.279743	0.536977	0.762058	0.987138	0.369775
0.289003	0.411765	0.299233	0.215385	0.189744	0.238462	0.01023	0.26087	0.452685	0.73913	0.98977	0.005115	0.317136	0.529412	0.762148	1	0.002558	0.179028	0.473146	0.721228	0.997442	0.396419	0.194373	0.409207	0.089744	0.079487	0.002564	0.002558	0.276215	0.514066	0.734015	1	0.007673	0.202046	0.654731	0.744246	0.959079	0.030691	0.237852	0.409207	0.787724	0.992327	0.575448	0.369231	0.007673	0.217391	0.537084	0.774936	0.992327	0.450128
0.239623	0.45283	0.307547	0.226843	0.145558	0.294896	0.003774	0.256604	0.532075	0.773585	1	0.00566	0.25283	0.490566	0.741509	0.992453	0.001887	0.233962	0.477358	0.743396	0.996226	0.545283	0.103774	0.350943	0.047259	0.066163	0.005671	0.001887	0.284906	0.507547	0.720755	1	0.09434	0.264151	0.730189	0.828302	0.945283	0.00566	0.171698	0.477358	0.688679	0.981132	0.579245	0.355388	0.007547	0.250943	0.481132	0.766038	0.996226	0.450943
0.243333	0.496667	0.26	0.22408	0.157191	0.237458	0.013333	0.293333	0.53	0.793333	0.993333	0.006667	0.24	0.52	0.733333	0.996667	0.003333	0.236667	0.45	0.68	1	0.41	0.293333	0.296667	0.107023	0.046823	0.006689	0.003333	0.116667	0.406667	0.766667	1	0.173333	0.283333	0.54	0.78	0.98	0.01	0.36	0.453333	0.686667	0.866667	0.626667	0.334448	0.006667	0.296667	0.49	0.693333	0.983333	0.503333
0.342105	0.299342	0.358553	0.188119	0.247525	0.194719	0.006579	0.220395	0.480263	0.769737	0.993421	0.009868	0.226974	0.490132	0.746711	0.996711	0.003289	0.263158	0.519737	0.740132	1	0.401316	0.151316	0.447368	0.059406	0.105611	0.006601	0.003289	0.190789	0.473684	0.746711	1	0.029605	0.111842	0.210526	0.684211	0.871711	0.0625	0.325658	0.565789	0.736842	0.990132	0.575658	0.422442	0.023026	0.259868	0.444079	0.703947	0.986842	0.282895
0.262976	0.474048	0.262976	0.243056	0.170139	0.298611	0.00346	0.193772	0.453287	0.740484	0.99654	0.010381	0.280277	0.50173	0.757785	0.982699	0.00692	0.211073	0.49827	0.726644	1	0.404844	0.550173	0.044983	0.131944	0.027778	0	0.00346	0.297578	0.418685	0.66436	1	0.00692	0.186851	0.577855	0.802768	0.99654	0.207612	0.214533	0.311419	0.546713	0.647059	0.408304	0.513889	0.020761	0.290657	0.515571	0.743945	0.986159	0.508651
0.220238	0.5	0.279762	0.209581	0.149701	0.245509	0.02381	0.208333	0.369048	0.654762	0.994048	0.011905	0.261905	0.505952	0.744048	0.982143	0.005952	0.202381	0.559524	0.755952	1	0.422619	0.166667	0.410714	0.071856	0.131737	0	0.005952	0.178571	0.470238	0.702381	1	0.035714	0.285714	0.482143	0.714286	0.880952	0.089286	0.238095	0.589286	0.791667	0.982143	0.690476	0.347305	0.029762	0.279762	0.565476	0.755952	0.988095	0.446429
0.361842	0.345395	0.292763	0.234323	0.254125	0.20132	0.006579	0.217105	0.447368	0.631579	0.996711	0.013158	0.253289	0.552632	0.763158	0.993421	0.003289	0.259868	0.463816	0.730263	1	0.467105	0.210526	0.322368	0.056106	0.062706	0.009901	0.003289	0.282895	0.680921	0.796053	1	0.082237	0.233553	0.322368	0.411184	0.973684	0.013158	0.197368	0.5	0.611842	0.930921	0.440789	0.39604	0.013158	0.269737	0.467105	0.733553	0.986842	0.401316
0.388889	0.333333	0.277778	0.232	0.232	0.208	0.015873	0.190476	0.404762	0.698413	0.944444	0.055556	0.309524	0.611111	0.777778	1	0.007937	0.198413	0.47619	0.690476	0.97619	0.31746	0	0.68254	0	0.096	0	0.007937	0.087302	0.5	0.714286	1	0	0	0	0	0	0.031746	0.309524	0.484127	0.746032	0.920635	0.428571	0.48	0.031746	0.253968	0.484127	0.714286	0.97619	0.34127
0.296552	0.418391	0.285057	0.278802	0.18894	0.237327	0.006897	0.278161	0.547126	0.74023	1	0.004598	0.23908	0.457471	0.772414	0.997701	0.002299	0.225287	0.491954	0.71954	0.967816	0.510345	0.303448	0.186207	0.145161	0.052995	0.006912	0.002299	0.285057	0.485057	0.74023	1	0.050575	0.25977	0.491954	0.689655	0.947126	0.004598	0.126437	0.567816	0.806897	0.914943	0.581609	0.35023	0.009195	0.266667	0.475862	0.703448	0.990805	0.432184
[truncated: 437 more rows]
[truncated: 83 more columns]
