# Supplementary material for: Prediction of RNA‐Binding Proteins by Voting Systems
Source: Hindawi journal article supplement (doi:10.1155/2011/506205), 2011-01-01
Supplement: f1 [file 506205.f1.zip › testSet2.csv]

v1	v2	v3	v4	v5	v6	v7	v8	v9	v10	v11	v12	v13	v14	v15	v16	v17	v18	v19	v20	v21	v22	v23	v24	v25	v26	v27	v28	v29	v30	v31	v32	v33	v34	v35	v36	v37	v38	v39	v40	v41	v42	v43	v44	v45	v46	v47	v48	v49	v50
0.356989	0.322581	0.32043	0.200431	0.213362	0.221983	0.004301	0.288172	0.516129	0.862366	0.997849	0.006452	0.191398	0.466667	0.705376	0.978495	0.002151	0.245161	0.492473	0.686022	1	0.490323	0.139785	0.369892	0.05819	0.084052	0.006466	0.002151	0.288172	0.670968	0.877419	1	0.010753	0.255914	0.423656	0.634409	0.748387	0.036559	0.223656	0.397849	0.565591	0.862366	0.509677	0.323276	0.008602	0.217204	0.412903	0.64086	0.995699	0.363441
0.325279	0.330855	0.343866	0.212291	0.208566	0.264432	0.003717	0.202602	0.44052	0.672862	0.996283	0.007435	0.273234	0.539033	0.769517	0.992565	0.001859	0.258364	0.522305	0.767658	1	0.414498	0.072491	0.513011	0.031657	0.094972	0.001862	0.001859	0.262082	0.574349	0.79368	1	0.042751	0.087361	0.765799	0.86803	0.964684	0.007435	0.234201	0.436803	0.6171	0.992565	0.581784	0.387337	0.009294	0.245353	0.520446	0.767658	0.992565	0.355019
0.429091	0.436364	0.134545	0.416058	0.120438	0.124088	0.010909	0.298182	0.563636	0.792727	1	0.007273	0.276364	0.487273	0.723636	0.996364	0.003636	0.109091	0.243636	0.632727	0.938182	0.810909	0.098182	0.090909	0.036496	0.029197	0	0.003636	0.367273	0.570909	0.781818	1	0.029091	0.12	0.145455	0.28	0.938182	0.072727	0.090909	0.210909	0.232727	0.807273	0.258182	0.335766	0.029091	0.145455	0.294545	0.512727	0.949091	0.443636
0.375	0.367647	0.257353	0.281481	0.177778	0.2	0.022059	0.205882	0.389706	0.654412	0.992647	0.036765	0.235294	0.558824	0.816176	1	0.007353	0.286765	0.477941	0.698529	0.948529	0.316176	0.007353	0.676471	0.014815	0.074074	0	0.007353	0.176471	0.647059	0.911765	1	0.977941	0.977941	0.977941	0.977941	0.977941	0.058824	0.272059	0.441176	0.683824	0.867647	0.411765	0.459259	0.029412	0.308824	0.492647	0.691176	0.926471	0.352941
0.446009	0.29108	0.262911	0.207547	0.264151	0.150943	0.00939	0.253521	0.478873	0.71831	0.995305	0.014085	0.328638	0.605634	0.816901	0.985915	0.004695	0.206573	0.408451	0.652582	1	0.516432	0.234742	0.248826	0.108491	0.042453	0.014151	0.004695	0.328638	0.525822	0.769953	1	0.032864	0.253521	0.384977	0.877934	0.948357	0.014085	0.103286	0.43662	0.58216	0.694836	0.262911	0.320755	0.018779	0.15493	0.356808	0.633803	0.938967	0.28169
0.318072	0.433735	0.248193	0.2657	0.169082	0.214976	0.004819	0.214458	0.481928	0.725301	0.990361	0.007229	0.260241	0.515663	0.785542	1	0.00241	0.26988	0.520482	0.718072	0.992771	0.583133	0.151807	0.26506	0.067633	0.082126	0	0.00241	0.286747	0.549398	0.8	1	0.115663	0.298795	0.46988	0.648193	0.763855	0.007229	0.091566	0.486747	0.718072	0.987952	0.46506	0.381643	0.007229	0.296386	0.583133	0.792771	0.995181	0.428916
0.309091	0.4	0.290909	0.22561	0.213415	0.231707	0.024242	0.224242	0.442424	0.739394	0.987879	0.012121	0.272727	0.539394	0.775758	1	0.006061	0.212121	0.436364	0.709091	0.957576	0.266667	0.157576	0.575758	0.054878	0.103659	0.006098	0.006061	0.2	0.466667	0.70303	1	0.151515	0.309091	0.490909	0.648485	0.709091	0.030303	0.242424	0.551515	0.824242	0.987879	0.49697	0.47561	0.048485	0.30303	0.50303	0.715152	0.957576	0.418182
0.396226	0.306604	0.29717	0.218009	0.274882	0.146919	0.014151	0.240566	0.528302	0.740566	0.995283	0.009434	0.169811	0.481132	0.745283	1	0.004717	0.283019	0.471698	0.716981	0.966981	0.466981	0.150943	0.382075	0.056872	0.066351	0.028436	0.004717	0.146226	0.495283	0.768868	1	0.20283	0.264151	0.575472	0.896226	0.981132	0.037736	0.311321	0.419811	0.712264	0.948113	0.457547	0.417062	0.018868	0.325472	0.476415	0.698113	0.981132	0.287736
0.3475	0.305	0.3475	0.20802	0.245614	0.213033	0.01	0.2775	0.505	0.7875	1	0.0075	0.19	0.43	0.705	0.9975	0.0025	0.2625	0.5225	0.7625	0.985	0.345	0.0925	0.5625	0.0401	0.120301	0.005013	0.0025	0.225	0.425	0.735	1	0.055	0.115	0.1975	0.29	0.36	0.01	0.4	0.5875	0.775	0.985	0.545	0.41604	0.015	0.27	0.4625	0.6975	0.98	0.31
0.413333	0.36	0.226667	0.27027	0.162162	0.162162	0.04	0.2	0.506667	0.786667	0.96	0.026667	0.226667	0.36	0.613333	0.973333	0.013333	0.28	0.546667	0.666667	1	0.546667	0	0.453333	0	0.081081	0	0.013333	0.2	0.333333	0.6	1	0	0	0	0	0	0.133333	0.493333	0.653333	0.76	0.88	0.32	0.243243	0.08	0.466667	0.546667	0.626667	0.866667	0.373333
0.3025	0.36125	0.33625	0.215269	0.225282	0.257822	0.0075	0.25375	0.5275	0.75875	0.99875	0.005	0.26875	0.505	0.73625	0.99625	0.00125	0.21375	0.465	0.7475	1	0.47125	0.23125	0.2975	0.100125	0.057572	0.002503	0.00125	0.23375	0.485	0.7425	1	0.03875	0.195	0.405	0.75	0.9625	0.00625	0.3175	0.57375	0.70375	0.99375	0.56875	0.392991	0.00375	0.2625	0.47125	0.74	0.995	0.41875
0.381275	0.367707	0.251018	0.258152	0.177989	0.157609	0.006784	0.213026	0.518318	0.791045	1	0.004071	0.229308	0.458616	0.709634	0.998643	0.001357	0.299864	0.523745	0.724559	0.997286	0.400271	0.024423	0.575305	0.009511	0.099185	0.001359	0.001357	0.105834	0.459973	0.815468	1	0.056988	0.061058	0.876526	0.881954	0.924016	0.157395	0.327001	0.506106	0.690638	0.993216	0.431479	0.347826	0.016282	0.332429	0.503392	0.693351	0.994573	0.393487
0.330626	0.358245	0.311129	0.233333	0.202439	0.222764	0.007311	0.216084	0.459789	0.720552	0.993501	0.001625	0.233144	0.48091	0.758733	1	0.000812	0.295695	0.535337	0.762794	0.998375	0.429732	0.137287	0.432981	0.047967	0.086992	0.004065	0.000812	0.186028	0.461413	0.718928	1	0.030057	0.457352	0.625508	0.87896	0.952071	0.001625	0.26645	0.476848	0.757108	0.992689	0.510154	0.349593	0.003249	0.305443	0.537774	0.75792	0.998375	0.379366
0.370618	0.325543	0.30384	0.214047	0.217391	0.198997	0.003339	0.203673	0.479132	0.752922	0.998331	0.006678	0.257095	0.467446	0.741235	1	0.001669	0.308848	0.529215	0.732888	0.993322	0.435726	0.153589	0.410684	0.056856	0.090301	0.006689	0.001669	0.15025	0.355593	0.687813	1	0.026711	0.400668	0.589316	0.737896	0.861436	0.005008	0.327212	0.542571	0.786311	0.994992	0.482471	0.327759	0.005008	0.350584	0.524207	0.734558	0.993322	0.348915
0.378947	0.305263	0.315789	0.265957	0.255319	0.159574	0.021053	0.252632	0.484211	0.768421	1	0.042105	0.242105	0.410526	0.642105	0.989474	0.010526	0.2	0.547368	0.821053	0.957895	0.326316	0.294737	0.378947	0.106383	0.06383	0.021277	0.010526	0.147368	0.463158	0.6	1	0.042105	0.105263	0.515789	0.652632	0.968421	0.168421	0.252632	0.547368	0.810526	0.936842	0.494737	0.425532	0.042105	0.2	0.505263	0.705263	0.957895	0.315789
0.379001	0.370038	0.25096	0.289744	0.166667	0.203846	0.002561	0.211268	0.482714	0.742638	0.99872	0.005122	0.265045	0.536492	0.769526	1	0.00128	0.254802	0.462228	0.724712	0.997439	0.582586	0.15749	0.259923	0.062821	0.057692	0.003846	0.00128	0.294494	0.556978	0.848912	1	0.014085	0.284251	0.454545	0.641485	0.81306	0.058899	0.183099	0.362356	0.650448	0.988476	0.475032	0.379487	0.003841	0.290653	0.53009	0.800256	0.997439	0.357234
0.414938	0.244813	0.340249	0.18711	0.288981	0.191268	0.006224	0.248963	0.497925	0.763485	1	0.008299	0.215768	0.473029	0.690871	0.987552	0.002075	0.26556	0.526971	0.761411	0.993776	0.292531	0.226141	0.481328	0.064449	0.081081	0.002079	0.002075	0.182573	0.495851	0.686722	1	0.093361	0.290456	0.385892	0.558091	0.995851	0.006224	0.242739	0.653527	0.821577	0.966805	0.481328	0.428274	0.010373	0.282158	0.504149	0.732365	0.993776	0.288382
0.29771	0.419847	0.282443	0.192308	0.161538	0.284615	0.022901	0.251908	0.580153	0.80916	0.992366	0.015267	0.229008	0.427481	0.671756	0.923664	0.007634	0.19084	0.480916	0.748092	1	0.526718	0.244275	0.229008	0.076923	0.046154	0	0.007634	0.221374	0.396947	0.839695	1	0.099237	0.183206	0.282443	0.603053	0.801527	0.40458	0.450382	0.51145	0.687023	0.984733	0.473282	0.4	0.068702	0.198473	0.419847	0.656489	0.977099	0.435115
0.369748	0.302521	0.327731	0.211864	0.254237	0.177966	0.033613	0.252101	0.529412	0.689076	1	0.016807	0.201681	0.403361	0.705882	0.966387	0.008403	0.277311	0.554622	0.789916	0.983193	0.352941	0.151261	0.495798	0.042373	0.076271	0.008475	0.008403	0.084034	0.285714	0.420168	1	0.310924	0.336134	0.453782	0.756303	0.798319	0.109244	0.487395	0.613445	0.848739	0.983193	0.462185	0.355932	0.058824	0.361345	0.579832	0.764706	0.983193	0.294118
0.342268	0.371134	0.286598	0.245868	0.200413	0.216942	0.004124	0.224742	0.461856	0.709278	0.995876	0.014433	0.251546	0.492784	0.783505	0.989691	0.002062	0.274227	0.515464	0.764948	1	0.391753	0.098969	0.509278	0.053719	0.11157	0.012397	0.002062	0.245361	0.51134	0.795876	1	0.008247	0.294845	0.441237	0.82268	0.997938	0.020619	0.235052	0.492784	0.65567	0.950515	0.529897	0.433884	0.010309	0.286598	0.529897	0.781443	0.993814	0.391753
0.410909	0.381818	0.207273	0.29927	0.211679	0.149635	0.014545	0.250909	0.48	0.72	0.981818	0.007273	0.192727	0.436364	0.723636	1	0.003636	0.363636	0.607273	0.781818	0.996364	0.727273	0.036364	0.236364	0.021898	0.072993	0	0.003636	0.181818	0.432727	0.767273	1	0.807273	0.810909	0.872727	0.898182	0.909091	0.250909	0.356364	0.523636	0.661818	0.978182	0.243636	0.357664	0.010909	0.276364	0.549091	0.778182	0.985455	0.432727
0.522727	0.25	0.227273	0.298851	0.264368	0.114943	0.034091	0.193182	0.409091	0.715909	1	0.022727	0.340909	0.625	0.829545	0.965909	0.011364	0.215909	0.465909	0.681818	0.863636	0.454545	0.090909	0.454545	0.057471	0.08046	0.011494	0.011364	0.25	0.465909	0.886364	1	0.306818	0.681818	0.829545	0.852273	0.875	0.090909	0.193182	0.443182	0.613636	0.784091	0.295455	0.390805	0.045455	0.363636	0.579545	0.693182	0.863636	0.261364
0.38961	0.272727	0.337662	0.196078	0.261438	0.183007	0.038961	0.246753	0.577922	0.837662	0.993506	0.012987	0.214286	0.38961	0.597403	0.941558	0.006494	0.227273	0.467532	0.707792	1	0.474026	0.24026	0.285714	0.091503	0.052288	0	0.006494	0.24026	0.493506	0.831169	1	0.025974	0.318182	0.428571	0.707792	0.88961	0.064935	0.12987	0.577922	0.649351	0.824675	0.467532	0.392157	0.025974	0.331169	0.474026	0.720779	0.948052	0.266234
0.441441	0.252252	0.306306	0.263636	0.290909	0.172727	0.018018	0.288288	0.531532	0.756757	1	0.045045	0.189189	0.378378	0.702703	0.927928	0.009009	0.234234	0.495495	0.72973	0.972973	0.432432	0.297297	0.27027	0.118182	0.063636	0.009091	0.009009	0.27027	0.630631	0.774775	1	0.036036	0.333333	0.603604	0.801802	0.963964	0.081081	0.135135	0.261261	0.45045	0.927928	0.396396	0.418182	0.036036	0.189189	0.45045	0.783784	0.972973	0.288288
0.397576	0.345455	0.25697	0.256068	0.199029	0.163835	0.006061	0.306667	0.58303	0.803636	1	0.002424	0.220606	0.464242	0.718788	0.995152	0.001212	0.21697	0.398788	0.667879	0.997576	0.446061	0.124848	0.429091	0.052184	0.076456	0.003641	0.001212	0.236364	0.569697	0.740606	1	0.048485	0.246061	0.395152	0.574545	0.97697	0.030303	0.253333	0.521212	0.755152	0.996364	0.390303	0.300971	0.042424	0.214545	0.379394	0.552727	0.996364	0.397576
0.347911	0.330418	0.321672	0.218872	0.216926	0.236381	0.001944	0.237123	0.458698	0.718173	0.996113	0.007775	0.242954	0.50826	0.750243	0.999028	0.000972	0.262391	0.52964	0.773567	1	0.471331	0.200194	0.328474	0.070039	0.064202	0.007782	0.000972	0.272109	0.456754	0.746356	1	0.004859	0.283771	0.489796	0.742468	0.979592	0.015549	0.195335	0.601555	0.783285	0.897959	0.535471	0.340467	0.002915	0.250729	0.52964	0.762877	0.998056	0.360544
0.277978	0.415162	0.306859	0.210145	0.166667	0.257246	0.025271	0.202166	0.512635	0.758123	0.99639	0.00722	0.245487	0.458484	0.700361	1	0.00361	0.281588	0.505415	0.740072	0.99278	0.422383	0.169675	0.407942	0.050725	0.072464	0	0.00361	0.184116	0.429603	0.700361	1	0.216606	0.314079	0.447653	0.65343	0.743682	0.054152	0.270758	0.537906	0.833935	0.99278	0.541516	0.376812	0.061372	0.285199	0.490975	0.689531	0.99278	0.436823
0.370466	0.365285	0.264249	0.246433	0.190661	0.18677	0.003886	0.198187	0.505181	0.759067	1	0.002591	0.25	0.477979	0.748705	0.998705	0.001295	0.304404	0.51943	0.720207	0.996114	0.512953	0.120466	0.36658	0.051881	0.077821	0.002594	0.001295	0.158031	0.387306	0.725389	1	0.091969	0.380829	0.550518	0.664508	0.954663	0.005181	0.340674	0.568653	0.80829	0.994819	0.42487	0.33463	0.005181	0.304404	0.496114	0.704663	0.996114	0.411917
0.302059	0.411899	0.286041	0.254587	0.176606	0.229358	0.011442	0.276888	0.530892	0.771167	0.995423	0.006865	0.244851	0.496568	0.727689	1	0.002288	0.221968	0.471396	0.741419	0.993135	0.386728	0.128146	0.485126	0.055046	0.082569	0	0.002288	0.361556	0.560641	0.773455	1	0.402746	0.576659	0.695652	0.8627	0.995423	0.02746	0.16476	0.336384	0.643021	0.90389	0.601831	0.334862	0.006865	0.240275	0.505721	0.729977	0.990847	0.475973
0.335	0.27	0.395	0.180905	0.261307	0.21608	0.015	0.19	0.435	0.75	0.98	0.02	0.285	0.56	0.78	1	0.005	0.24	0.475	0.72	0.975	0.47	0.185	0.345	0.070352	0.070352	0.030151	0.005	0.155	0.52	0.76	1	0.205	0.28	0.615	0.93	0.99	0.035	0.31	0.41	0.55	0.945	0.515	0.40201	0.02	0.325	0.515	0.765	0.985	0.175
0.443182	0.227273	0.329545	0.218391	0.356322	0.126437	0.022727	0.227273	0.5	0.738636	0.988636	0.068182	0.261364	0.431818	0.818182	0.931818	0.011364	0.204545	0.488636	0.659091	1	0.329545	0.238636	0.431818	0.08046	0.057471	0.011494	0.011364	0.409091	0.488636	0.761364	1	0.306818	0.375	0.545455	0.636364	0.704545	0.034091	0.125	0.238636	0.806818	0.920455	0.375	0.482759	0.034091	0.136364	0.295455	0.579545	0.897727	0.272727
0.358974	0.333333	0.307692	0.221963	0.235981	0.21729	0.013986	0.263403	0.503497	0.792541	0.997669	0.004662	0.226107	0.508159	0.736597	0.993007	0.002331	0.247086	0.477855	0.694639	1	0.389277	0.398601	0.212121	0.107477	0.056075	0.023364	0.002331	0.27972	0.5338	0.764569	1	0.04662	0.265734	0.543124	0.757576	0.979021	0.004662	0.09324	0.32634	0.713287	0.995338	0.480186	0.397196	0.009324	0.2331	0.487179	0.72028	0.990676	0.398601
0.450382	0.423664	0.125954	0.494253	0.118774	0.091954	0.01145	0.278626	0.496183	0.721374	0.984733	0.007634	0.335878	0.576336	0.805344	1	0.003817	0.114504	0.21374	0.30916	0.969466	0.820611	0.103053	0.076336	0.045977	0.015326	0	0.003817	0.377863	0.583969	0.793893	1	0.041985	0.141221	0.206107	0.301527	0.729008	0.087786	0.103053	0.122137	0.248092	0.267176	0.236641	0.252874	0.038168	0.156489	0.290076	0.522901	0.977099	0.412214
0.441727	0.305036	0.253237	0.255043	0.197406	0.184438	0.002878	0.283453	0.507914	0.720863	0.998561	0.008633	0.233094	0.494964	0.753957	1	0.001439	0.227338	0.446043	0.795683	0.994245	0.397122	0.047482	0.555396	0.023055	0.083573	0.002882	0.001439	0.146763	0.381295	0.765468	1	0.03741	0.08777	0.241727	0.264748	0.805755	0.010072	0.382734	0.568345	0.72518	0.995683	0.353957	0.377522	0.015827	0.221583	0.42446	0.743885	0.992806	0.320863
0.30094	0.369906	0.329154	0.207547	0.194969	0.254717	0.012539	0.275862	0.564263	0.777429	0.974922	0.009404	0.206897	0.479624	0.677116	1	0.003135	0.257053	0.501567	0.758621	0.996865	0.420063	0.23511	0.344828	0.069182	0.062893	0	0.003135	0.203762	0.460815	0.648903	1	0.031348	0.181818	0.54232	0.796238	0.949843	0.0721	0.341693	0.510972	0.705329	0.990596	0.561129	0.339623	0.025078	0.213166	0.476489	0.727273	0.99373	0.388715
0.344538	0.367647	0.287815	0.242105	0.2	0.185263	0.004202	0.25	0.476891	0.743697	0.995798	0.008403	0.228992	0.491597	0.726891	1	0.002101	0.258403	0.537815	0.773109	0.968487	0.558824	0.197479	0.243697	0.067368	0.054737	0	0.002101	0.231092	0.497899	0.741597	1	0.056723	0.210084	0.409664	0.82563	0.968487	0.079832	0.359244	0.548319	0.75	0.995798	0.47479	0.353684	0.014706	0.310924	0.533613	0.756303	0.970588	0.380252
0.404959	0.322314	0.272727	0.225	0.241667	0.191667	0.016529	0.190083	0.413223	0.710744	0.991736	0.033058	0.305785	0.53719	0.768595	0.975207	0.008264	0.280992	0.471074	0.735537	1	0.330579	0.231405	0.438017	0.083333	0.083333	0	0.008264	0.239669	0.487603	0.809917	1	0.256198	0.330579	0.38843	0.752066	0.85124	0.041322	0.140496	0.586777	0.694215	0.958678	0.446281	0.3	0.099174	0.330579	0.487603	0.793388	0.983471	0.272727
0.493056	0.25	0.256944	0.300699	0.216783	0.090909	0.020833	0.166667	0.465278	0.770833	0.993056	0.013889	0.25	0.555556	0.743056	0.9375	0.006944	0.326389	0.479167	0.638889	1	0.597222	0.3125	0.090278	0.111888	0.027972	0	0.006944	0.145833	0.520833	0.819444	1	0.159722	0.270833	0.402778	0.527778	0.798611	0.673611	0.6875	0.708333	0.729167	0.979167	0.375	0.335664	0.180556	0.340278	0.520833	0.659722	0.979167	0.354167
0.292994	0.388535	0.318471	0.214286	0.19898	0.279337	0.002548	0.264968	0.521019	0.728662	0.997452	0.005096	0.242038	0.490446	0.755414	1	0.001274	0.234395	0.487898	0.756688	0.996178	0.466242	0.263694	0.270064	0.118622	0.057398	0.003827	0.001274	0.203822	0.466242	0.721019	1	0.002548	0.257325	0.426752	0.807643	0.993631	0.006369	0.319745	0.541401	0.710828	0.984713	0.563057	0.423469	0.003822	0.266242	0.459873	0.704459	0.996178	0.383439
0.278873	0.51831	0.202817	0.274011	0.081921	0.251412	0.011268	0.143662	0.338028	0.732394	0.988732	0.005634	0.301408	0.495775	0.757746	0.994366	0.002817	0.346479	0.543662	0.723944	1	0.895775	0.033803	0.070423	0.028249	0.028249	0	0.002817	0.301408	0.538028	0.769014	1	0.016901	0.022535	0.498592	0.55493	0.95493	0.053521	0.101408	0.11831	0.250704	0.974648	0.388732	0.389831	0.016901	0.411268	0.552113	0.749296	0.983099	0.509859
0.295669	0.404896	0.299435	0.273585	0.167925	0.273585	0.003766	0.210923	0.451977	0.72693	0.998117	0.013183	0.26742	0.506591	0.745763	0.996234	0.001883	0.250471	0.512241	0.747646	1	0.399247	0.07533	0.525424	0.030189	0.09434	0.003774	0.001883	0.244821	0.610169	0.79096	1	0.05838	0.681733	0.766478	0.919021	0.964218	0.00565	0.239171	0.436911	0.606403	0.992467	0.595104	0.369811	0.007533	0.274953	0.525424	0.762712	0.990584	0.444444
0.438053	0.345133	0.216814	0.306667	0.204444	0.164444	0.017699	0.247788	0.517699	0.79646	1	0.00885	0.20354	0.49115	0.734513	0.982301	0.004425	0.300885	0.464602	0.676991	0.986726	0.672566	0.123894	0.20354	0.035556	0.062222	0	0.004425	0.20354	0.455752	0.778761	1	0.345133	0.464602	0.495575	0.663717	0.69469	0.017699	0.402655	0.575221	0.743363	0.986726	0.314159	0.328889	0.022124	0.362832	0.522124	0.668142	0.986726	0.384956
0.327586	0.327586	0.344828	0.226087	0.26087	0.226087	0.017241	0.258621	0.491379	0.715517	0.982759	0.025862	0.163793	0.508621	0.741379	0.939655	0.008621	0.241379	0.474138	0.732759	1	0.215517	0.405172	0.37931	0.043478	0.06087	0.026087	0.008621	0.137931	0.37931	0.577586	1	0.077586	0.655172	0.758621	0.87931	0.982759	0.051724	0.224138	0.353448	0.491379	0.62931	0.474138	0.486957	0.068966	0.241379	0.474138	0.689655	0.965517	0.327586
0.21097	0.565401	0.223629	0.207627	0.09322	0.224576	0.016878	0.248945	0.396624	0.565401	1	0.021097	0.274262	0.590717	0.780591	0.983122	0.004219	0.202532	0.438819	0.628692	0.995781	0.759494	0.135021	0.105485	0.067797	0.033898	0	0.004219	0.341772	0.607595	0.810127	1	0.139241	0.253165	0.312236	0.409283	0.561181	0.084388	0.198312	0.223629	0.362869	0.751055	0.544304	0.305085	0.008439	0.375527	0.64557	0.793249	0.978903	0.527426
0.363333	0.325	0.311667	0.198664	0.237062	0.215359	0.005	0.233333	0.5	0.793333	1	0.013333	0.291667	0.51	0.771667	0.998333	0.001667	0.23	0.461667	0.675	0.996667	0.506667	0.143333	0.35	0.0601	0.106845	0.006678	0.001667	0.286667	0.53	0.775	1	0.048333	0.173333	0.578333	0.728333	0.945	0.006667	0.233333	0.393333	0.651667	0.996667	0.488333	0.404007	0.01	0.236667	0.515	0.725	0.995	0.326667
0.408654	0.278846	0.3125	0.21256	0.2657	0.164251	0.014423	0.259615	0.5	0.778846	1	0.009615	0.173077	0.418269	0.639423	0.971154	0.004808	0.307692	0.514423	0.75	0.990385	0.475962	0.149038	0.375	0.062802	0.072464	0.033816	0.004808	0.149038	0.514423	0.711538	1	0.230769	0.293269	0.596154	0.697115	0.961538	0.038462	0.346154	0.456731	0.745192	0.985577	0.461538	0.396135	0.019231	0.360577	0.514423	0.745192	0.975962	0.254808
0.454545	0.363636	0.181818	0.367816	0.172414	0.114943	0.034091	0.227273	0.454545	0.795455	1	0.022727	0.272727	0.534091	0.704545	0.988636	0.011364	0.318182	0.443182	0.75	0.943182	0.170455	0.011364	0.818182	0.022989	0.068966	0	0.011364	0.034091	0.488636	0.772727	1	0.761364	0.761364	0.761364	0.761364	0.761364	0.056818	0.25	0.454545	0.693182	0.977273	0.340909	0.45977	0.079545	0.352273	0.579545	0.75	0.943182	0.386364
0.383117	0.266234	0.350649	0.183007	0.294118	0.183007	0.012987	0.272727	0.441558	0.714286	1	0.084416	0.233766	0.571429	0.785714	0.967532	0.006494	0.194805	0.487013	0.720779	0.961039	0.37013	0.311688	0.318182	0.130719	0.039216	0.013072	0.006494	0.142857	0.551948	0.766234	1	0.012987	0.24026	0.603896	0.863636	0.961039	0.162338	0.311688	0.38961	0.467532	0.798701	0.38961	0.48366	0.019481	0.201299	0.519481	0.720779	0.954545	0.25974
0.270833	0.388889	0.340278	0.230769	0.132867	0.258741	0.020833	0.256944	0.534722	0.666667	0.958333	0.013889	0.215278	0.416667	0.791667	0.979167	0.006944	0.263889	0.465278	0.743056	1	0.583333	0.368056	0.048611	0.195804	0.027972	0	0.006944	0.166667	0.4375	0.777778	1	0.111111	0.277778	0.472222	0.638889	0.993056	0.881944	0.881944	0.895833	0.9375	0.951389	0.527778	0.321678	0.111111	0.284722	0.555556	0.75	0.972222	0.375
0.35206	0.303371	0.344569	0.229323	0.244361	0.233083	0.026217	0.284644	0.546816	0.790262	0.996255	0.007491	0.250936	0.475655	0.764045	1	0.003745	0.217228	0.449438	0.662921	0.973783	0.445693	0.333333	0.220974	0.086466	0.06391	0.018797	0.003745	0.307116	0.565543	0.842697	1	0.011236	0.247191	0.393258	0.546816	0.962547	0.037453	0.093633	0.629213	0.764045	0.917603	0.490637	0.421053	0.014981	0.269663	0.47191	0.662921	0.985019	0.325843
0.391892	0.288288	0.31982	0.253394	0.248869	0.199095	0.009009	0.225225	0.45045	0.743243	1	0.027027	0.279279	0.576577	0.72973	0.959459	0.004505	0.220721	0.504505	0.756757	0.990991	0.36036	0.252252	0.387387	0.085973	0.067873	0.004525	0.004505	0.198198	0.405405	0.738739	1	0.144144	0.301802	0.522523	0.774775	0.981982	0.036036	0.337838	0.490991	0.675676	0.882883	0.432432	0.470588	0.027027	0.306306	0.536036	0.765766	0.981982	0.310811
0.387931	0.344828	0.267241	0.26087	0.156522	0.147826	0.017241	0.189655	0.387931	0.715517	0.974138	0.025862	0.284483	0.612069	0.853448	1	0.008621	0.232759	0.413793	0.560345	0.844828	0.715517	0.077586	0.206897	0.052174	0.052174	0	0.008621	0.284483	0.603448	0.784483	1	0.362069	0.517241	0.534483	0.948276	0.974138	0.155172	0.198276	0.25	0.431034	0.482759	0.232759	0.173913	0.094828	0.318966	0.422414	0.5	0.767241	0.37931
0.393443	0.360656	0.245902	0.366667	0.166667	0.15	0.04918	0.213115	0.459016	0.737705	0.967213	0.032787	0.163934	0.327869	0.606557	1	0.016393	0.42623	0.672131	0.770492	0.934426	0.639344	0.016393	0.344262	0.033333	0.1	0	0.016393	0.147541	0.360656	0.540984	1	0.442623	0.442623	0.442623	0.442623	0.442623	0.278689	0.590164	0.704918	0.786885	0.885246	0.311475	0.366667	0.344262	0.47541	0.655738	0.770492	0.934426	0.442623
0.32539	0.406049	0.268561	0.26055	0.16789	0.222018	0.001833	0.235564	0.489459	0.740605	1	0.003666	0.217232	0.468378	0.777269	0.999083	0.000917	0.313474	0.555454	0.730522	0.996334	0.569203	0.093492	0.337305	0.043119	0.081651	0.002752	0.000917	0.172319	0.394134	0.771769	1	0.021998	0.284143	0.385885	0.88451	0.996334	0.004583	0.497709	0.614115	0.735105	0.938588	0.509624	0.387156	0.006416	0.339138	0.560037	0.757104	0.996334	0.401467
0.478788	0.284848	0.236364	0.262195	0.22561	0.115854	0.018182	0.157576	0.478788	0.745455	0.987879	0.012121	0.333333	0.448485	0.8	0.993939	0.006061	0.254545	0.515152	0.70303	1	0.436364	0.006061	0.557576	0.012195	0.121951	0	0.006061	0.212121	0.418182	0.806061	1	0.921212	0.921212	0.921212	0.921212	0.921212	0.030303	0.272727	0.533333	0.672727	0.987879	0.327273	0.353659	0.042424	0.351515	0.551515	0.69697	0.927273	0.315152
0.37276	0.286738	0.340502	0.21223	0.284173	0.194245	0.007168	0.232975	0.523297	0.781362	0.996416	0.010753	0.240143	0.433692	0.65233	1	0.003584	0.275986	0.526882	0.763441	0.989247	0.397849	0.172043	0.430108	0.05036	0.086331	0	0.003584	0.146953	0.430108	0.702509	1	0.222222	0.383513	0.458781	0.659498	0.749104	0.028674	0.272401	0.544803	0.83871	0.989247	0.55914	0.438849	0.010753	0.25448	0.480287	0.673835	0.989247	0.322581
0.369919	0.325203	0.304878	0.261224	0.24898	0.187755	0.00813	0.235772	0.54065	0.764228	1	0.020325	0.276423	0.52439	0.796748	0.98374	0.004065	0.227642	0.422764	0.646341	0.97561	0.296748	0.121951	0.581301	0.032653	0.097959	0	0.004065	0.162602	0.406504	0.654472	1	0.414634	0.735772	0.784553	0.813008	0.853659	0.01626	0.239837	0.487805	0.670732	0.99187	0.487805	0.35102	0.028455	0.235772	0.430894	0.654472	0.97561	0.292683
0.388005	0.359853	0.252142	0.259804	0.189951	0.186275	0.002448	0.198286	0.477356	0.74541	1	0.004896	0.27907	0.511628	0.761322	0.995104	0.001224	0.307222	0.50918	0.728274	0.996328	0.518972	0.132191	0.348837	0.050245	0.08701	0.006127	0.001224	0.177479	0.396573	0.725826	1	0.04284	0.358629	0.559364	0.698898	0.990208	0.045288	0.365973	0.575275	0.80661	0.979192	0.433293	0.311275	0.04284	0.362301	0.528764	0.734394	0.996328	0.400245
0.357013	0.417122	0.225865	0.279197	0.156934	0.184307	0.007286	0.313297	0.546448	0.757741	1	0.005464	0.205829	0.477231	0.695811	0.992714	0.001821	0.233151	0.45173	0.797814	0.998179	0.71949	0.061931	0.218579	0.043796	0.069343	0.007299	0.001821	0.198543	0.48816	0.708561	1	0.116576	0.227687	0.318761	0.68306	0.994536	0.005464	0.418944	0.557377	0.899818	0.969035	0.433515	0.39781	0.010929	0.213115	0.473588	0.766849	0.994536	0.420765
0.491018	0.293413	0.215569	0.301205	0.186747	0.144578	0.011976	0.323353	0.616766	0.820359	1	0.053892	0.185629	0.437126	0.652695	0.994012	0.005988	0.143713	0.329341	0.526946	0.928144	0.45509	0.185629	0.359281	0.072289	0.084337	0	0.005988	0.353293	0.532934	0.694611	1	0.143713	0.293413	0.341317	0.473054	0.682635	0.017964	0.215569	0.736527	0.826347	0.976048	0.281437	0.313253	0.023952	0.155689	0.323353	0.491018	0.928144	0.281437
0.392405	0.265823	0.341772	0.217949	0.230769	0.166667	0.075949	0.21519	0.556962	0.759494	1	0.063291	0.35443	0.468354	0.734177	0.974684	0.012658	0.164557	0.379747	0.594937	0.936709	0.240506	0.329114	0.43038	0.115385	0.038462	0.012821	0.012658	0.126582	0.341772	0.481013	1	0.025316	0.088608	0.253165	0.367089	0.531646	0.544304	0.632911	0.746835	0.860759	0.974684	0.417722	0.410256	0.025316	0.227848	0.405063	0.556962	0.936709	0.35443
0.400545	0.39782	0.201635	0.336066	0.155738	0.163934	0.008174	0.215259	0.463215	0.711172	0.989101	0.00545	0.280654	0.493188	0.752044	1	0.002725	0.258856	0.574932	0.803815	0.991826	0.675749	0.019074	0.305177	0.027322	0.114754	0	0.002725	0.27248	0.46594	0.754768	1	0.242507	0.242507	0.784741	0.858311	0.948229	0.065395	0.174387	0.594005	0.730245	0.901907	0.277929	0.36612	0.06267	0.27248	0.588556	0.790191	0.991826	0.452316
0.316667	0.35	0.333333	0.226891	0.226891	0.260504	0.05	0.216667	0.508333	0.733333	0.991667	0.025	0.266667	0.483333	0.741667	0.983333	0.008333	0.241667	0.458333	0.725	1	0.383333	0.166667	0.45	0.05042	0.084034	0	0.008333	0.183333	0.341667	0.691667	1	0.233333	0.266667	0.4	0.7	0.741667	0.033333	0.458333	0.583333	0.85	0.966667	0.491667	0.369748	0.05	0.375	0.525	0.725	0.966667	0.391667
0.404255	0.223404	0.37234	0.204301	0.301075	0.182796	0.042553	0.265957	0.542553	0.744681	1	0.021277	0.244681	0.478723	0.712766	0.978723	0.010638	0.202128	0.425532	0.670213	0.946809	0.404255	0.43617	0.159574	0.150538	0.043011	0.021505	0.010638	0.159574	0.62766	0.776596	1	0.106383	0.361702	0.5	0.755319	0.93617	0.085106	0.170213	0.212766	0.255319	0.56383	0.553191	0.408602	0.095745	0.297872	0.5	0.691489	0.946809	0.223404
0.291005	0.449735	0.259259	0.207447	0.18617	0.260638	0.058201	0.333333	0.62963	0.851852	0.978836	0.010582	0.179894	0.417989	0.608466	0.989418	0.005291	0.275132	0.455026	0.730159	1	0.375661	0.132275	0.492063	0.053191	0.085106	0	0.005291	0.126984	0.248677	0.502646	1	0.15873	0.26455	0.666667	0.867725	0.994709	0.015873	0.407407	0.566138	0.761905	0.962963	0.460317	0.393617	0.015873	0.174603	0.417989	0.666667	0.984127	0.486772
0.329365	0.39881	0.271825	0.272366	0.192843	0.182903	0.005952	0.230159	0.468254	0.755952	0.998016	0.019841	0.202381	0.448413	0.71627	1	0.001984	0.35119	0.559524	0.785714	0.996032	0.464286	0.073413	0.462302	0.027833	0.087475	0.003976	0.001984	0.130952	0.339286	0.666667	1	0.599206	0.662698	0.839286	0.89881	0.974206	0.007937	0.349206	0.511905	0.75	0.996032	0.376984	0.290258	0.003968	0.515873	0.678571	0.847222	0.996032	0.44246
0.349206	0.361905	0.288889	0.235669	0.210191	0.203822	0.015873	0.266667	0.438095	0.688889	0.996825	0.006349	0.250794	0.536508	0.771429	0.993651	0.003175	0.206349	0.51746	0.790476	1	0.555556	0.250794	0.193651	0.124204	0.066879	0.003185	0.003175	0.266667	0.479365	0.749206	1	0.038095	0.273016	0.539683	0.796825	0.996825	0.066667	0.215873	0.406349	0.593651	0.933333	0.549206	0.33121	0.019048	0.215873	0.514286	0.730159	0.990476	0.380952
0.417112	0.352941	0.229947	0.311828	0.182796	0.123656	0.032086	0.304813	0.550802	0.786096	0.994652	0.010695	0.251337	0.55615	0.759358	1	0.005348	0.176471	0.326203	0.545455	0.893048	0.347594	0.342246	0.31016	0.129032	0.021505	0	0.005348	0.240642	0.427807	0.572193	1	0.010695	0.117647	0.256684	0.406417	0.625668	0.657754	0.727273	0.823529	0.898396	0.97861	0.31016	0.430108	0.010695	0.203209	0.385027	0.604278	0.909091	0.358289
0.323529	0.433824	0.242647	0.276753	0.151292	0.214022	0.011029	0.183824	0.463235	0.720588	0.996324	0.007353	0.216912	0.518382	0.779412	1	0.003676	0.330882	0.503676	0.713235	0.974265	0.363971	0.099265	0.536765	0.02952	0.103321	0	0.003676	0.102941	0.279412	0.709559	1	0.507353	0.801471	0.841912	0.875	0.900735	0.051471	0.327206	0.496324	0.661765	0.963235	0.452206	0.309963	0.018382	0.3125	0.481618	0.669118	0.966912	0.470588
0.362218	0.402946	0.234835	0.296618	0.155247	0.187337	0.0026	0.282496	0.577123	0.790295	1	0.001733	0.22357	0.511265	0.761698	0.999133	0.000867	0.237435	0.422877	0.630849	0.966205	0.506066	0.116118	0.377816	0.049436	0.085863	0.004337	0.000867	0.185442	0.52513	0.793761	1	0.016464	0.292894	0.409879	0.681976	0.886482	0.003466	0.281629	0.541594	0.70104	0.988735	0.444541	0.348656	0.003466	0.218371	0.414211	0.665511	0.966205	0.443674
0.444149	0.295213	0.260638	0.232	0.218667	0.162667	0.005319	0.271277	0.505319	0.707447	1	0.023936	0.231383	0.478723	0.765957	0.99734	0.00266	0.199468	0.489362	0.800532	0.986702	0.513298	0.279255	0.207447	0.090667	0.058667	0.005333	0.00266	0.327128	0.515957	0.720745	1	0.029255	0.175532	0.300532	0.864362	0.984043	0.007979	0.412234	0.587766	0.773936	0.837766	0.430851	0.336	0.021277	0.207447	0.361702	0.81383	0.986702	0.332447
0.310345	0.431034	0.258621	0.306358	0.17341	0.179191	0.028736	0.229885	0.54023	0.735632	1	0.011494	0.183908	0.511494	0.747126	0.977011	0.005747	0.247126	0.454023	0.724138	0.994253	0.591954	0.172414	0.235632	0.069364	0.080925	0	0.005747	0.16092	0.436782	0.701149	1	0.218391	0.252874	0.5	0.574713	0.95977	0.137931	0.321839	0.678161	0.752874	0.91954	0.436782	0.393064	0.017241	0.298851	0.477011	0.706897	0.965517	0.413793
0.328767	0.394521	0.276712	0.252747	0.173077	0.17033	0.005479	0.219178	0.463014	0.726027	1	0.016438	0.252055	0.542466	0.805479	0.989041	0.00274	0.30137	0.479452	0.673973	0.994521	0.545205	0.189041	0.265753	0.07967	0.074176	0.002747	0.00274	0.249315	0.536986	0.772603	1	0.035616	0.391781	0.512329	0.641096	0.936986	0.005479	0.139726	0.276712	0.789041	0.917808	0.471233	0.368132	0.010959	0.345205	0.515068	0.715068	0.994521	0.405479
0.404632	0.257493	0.337875	0.204638	0.270123	0.169168	0.002725	0.27248	0.543597	0.769755	0.99455	0.010899	0.192098	0.440054	0.69346	0.997275	0.001362	0.257493	0.50545	0.735695	1	0.43188	0.179837	0.388283	0.087312	0.065484	0.002729	0.001362	0.280654	0.549046	0.803815	1	0.00545	0.179837	0.450954	0.867847	0.998638	0.027248	0.26158	0.483651	0.610354	0.948229	0.536785	0.392906	0.006812	0.265668	0.480926	0.711172	0.995913	0.280654
0.360424	0.286219	0.353357	0.205674	0.241135	0.202128	0.007067	0.24735	0.526502	0.812721	0.992933	0.014134	0.279152	0.512367	0.731449	1	0.003534	0.226148	0.459364	0.696113	0.968198	0.409894	0.176678	0.413428	0.06383	0.092199	0	0.003534	0.190813	0.44523	0.696113	1	0.123675	0.289753	0.540636	0.583039	0.975265	0.024735	0.243816	0.4947	0.787986	0.939929	0.551237	0.397163	0.014134	0.229682	0.466431	0.664311	0.992933	0.286219
0.292135	0.5	0.207865	0.305085	0.101695	0.186441	0.02809	0.207865	0.426966	0.702247	0.91573	0.011236	0.292135	0.61236	0.831461	1	0.005618	0.11236	0.41573	0.533708	0.97191	0.752809	0.146067	0.101124	0.084746	0.039548	0.016949	0.005618	0.258427	0.55618	0.775281	1	0.314607	0.393258	0.5	0.601124	0.876404	0.039326	0.05618	0.089888	0.11236	0.842697	0.38764	0.293785	0.022472	0.325843	0.494382	0.735955	0.97191	0.516854
0.404103	0.323818	0.272079	0.267857	0.191071	0.163393	0.001784	0.231044	0.444246	0.706512	0.996432	0.006244	0.254237	0.459411	0.736842	1	0.000892	0.347904	0.589652	0.79661	0.997324	0.580731	0.165031	0.254237	0.071429	0.057143	0.003571	0.000892	0.224799	0.383586	0.706512	1	0.024978	0.199822	0.494202	0.751115	0.99554	0.008921	0.473684	0.666369	0.794826	0.990187	0.409456	0.317857	0.002676	0.417484	0.611062	0.790366	0.997324	0.341659
0.35082	0.321311	0.327869	0.226974	0.246711	0.213816	0.013115	0.209836	0.459016	0.721311	0.996721	0.022951	0.288525	0.508197	0.708197	0.980328	0.003279	0.242623	0.514754	0.780328	1	0.52459	0.285246	0.190164	0.111842	0.039474	0.013158	0.003279	0.245902	0.465574	0.767213	1	0.006557	0.304918	0.563934	0.72459	0.954098	0.039344	0.098361	0.501639	0.806557	0.996721	0.537705	0.388158	0.009836	0.337705	0.511475	0.770492	0.990164	0.318033
0.30625	0.325	0.36875	0.176101	0.201258	0.27673	0.04375	0.26875	0.49375	0.725	0.975	0.0125	0.21875	0.425	0.7375	0.99375	0.00625	0.2375	0.50625	0.75	1	0.34375	0.025	0.63125	0.012579	0.075472	0.012579	0.00625	0.08125	0.3625	0.83125	1	0.0875	0.0875	0.09375	0.1	0.74375	0.13125	0.3125	0.5125	0.6875	0.93125	0.53125	0.339623	0.025	0.21875	0.50625	0.69375	0.9875	0.34375
0.35545	0.383886	0.260664	0.3	0.180952	0.17619	0.009479	0.241706	0.549763	0.767773	1	0.014218	0.232227	0.398104	0.616114	0.990521	0.004739	0.260664	0.592417	0.796209	0.971564	0.535545	0.14218	0.322275	0.07619	0.066667	0	0.004739	0.265403	0.398104	0.691943	1	0.009479	0.056872	0.587678	0.739336	0.924171	0.094787	0.199052	0.554502	0.791469	0.981043	0.521327	0.342857	0.014218	0.331754	0.521327	0.748815	0.981043	0.36019
0.304688	0.382812	0.3125	0.212598	0.19685	0.23622	0.015625	0.234375	0.5	0.640625	0.945312	0.03125	0.164062	0.421875	0.773438	1	0.007812	0.25	0.515625	0.734375	0.953125	0.421875	0.164062	0.414062	0.055118	0.070866	0.007874	0.007812	0.132812	0.367188	0.75	1	0.078125	0.3125	0.40625	0.445312	0.742188	0.117188	0.46875	0.59375	0.835938	0.945312	0.460938	0.362205	0.039062	0.320312	0.53125	0.71875	0.929688	0.390625
0.387665	0.299559	0.312775	0.212389	0.269912	0.19469	0.013216	0.22467	0.46696	0.726872	1	0.008811	0.290749	0.585903	0.770925	0.982379	0.004405	0.229075	0.462555	0.722467	0.973568	0.400881	0.22467	0.374449	0.070796	0.061947	0	0.004405	0.23348	0.502203	0.828194	1	0.044053	0.251101	0.343612	0.682819	0.911894	0.118943	0.207048	0.54185	0.634361	0.960352	0.515419	0.469027	0.022026	0.23348	0.497797	0.718062	0.933921	0.299559
0.364094	0.336409	0.299497	0.225021	0.207389	0.214945	0.002517	0.213926	0.472315	0.745805	1	0.001678	0.246644	0.511745	0.732383	0.997483	0.000839	0.290268	0.538591	0.77349	0.993289	0.416107	0.156879	0.427013	0.055416	0.078925	0.001679	0.000839	0.202181	0.473993	0.744128	1	0.003356	0.315436	0.462248	0.59396	0.908557	0.006711	0.265101	0.529362	0.759228	0.987416	0.505872	0.327456	0.008389	0.32802	0.543624	0.765101	0.990772	0.360738
0.339408	0.379651	0.280942	0.227204	0.193769	0.205927	0.002278	0.307517	0.517844	0.763857	0.999241	0.003797	0.162491	0.39104	0.692483	0.998481	0.000759	0.35915	0.589218	0.798026	1	0.607441	0.069096	0.323462	0.030395	0.068389	0.006079	0.000759	0.15186	0.303721	0.546697	1	0.350038	0.394077	0.45634	0.580866	0.901291	0.319666	0.624146	0.743356	0.88003	0.996203	0.507973	0.37386	0.001519	0.186029	0.529992	0.765376	0.997722	0.408504
0.409722	0.194444	0.395833	0.160839	0.307692	0.202797	0.013889	0.236111	0.458333	0.756944	1	0.048611	0.291667	0.548611	0.791667	0.979167	0.006944	0.215278	0.472222	0.673611	0.986111	0.361111	0.298611	0.340278	0.118881	0.076923	0.006993	0.006944	0.222222	0.451389	0.6875	1	0.041667	0.277778	0.5	0.722222	0.993056	0.069444	0.145833	0.534722	0.791667	0.909722	0.513889	0.48951	0.020833	0.215278	0.486111	0.729167	0.986111	0.201389
0.477273	0.329545	0.193182	0.333333	0.172414	0.091954	0.034091	0.193182	0.420455	0.715909	0.954545	0.022727	0.25	0.556818	0.772727	1	0.011364	0.318182	0.545455	0.647727	0.943182	0.215909	0	0.784091	0	0.068966	0	0.011364	0.045455	0.727273	0.784091	1	0	0	0	0	0	0.090909	0.284091	0.477273	0.670455	0.965909	0.306818	0.413793	0.045455	0.363636	0.534091	0.659091	0.943182	0.352273
0.260274	0.452055	0.287671	0.21978	0.181319	0.244505	0.005479	0.210959	0.441096	0.750685	0.980822	0.008219	0.290411	0.550685	0.747945	1	0.00274	0.205479	0.435616	0.706849	0.991781	0.539726	0.2	0.260274	0.082418	0.038462	0	0.00274	0.290411	0.542466	0.712329	1	0.032877	0.134247	0.309589	0.79726	0.926027	0.09589	0.216438	0.449315	0.865753	0.99726	0.468493	0.39011	0.038356	0.276712	0.506849	0.720548	0.972603	0.468493
0.313187	0.478022	0.208791	0.250689	0.162534	0.190083	0.008242	0.197802	0.409341	0.667582	0.989011	0.019231	0.368132	0.623626	0.802198	0.997253	0.002747	0.151099	0.343407	0.598901	1	0.431319	0.159341	0.409341	0.071625	0.060606	0	0.002747	0.236264	0.489011	0.752747	1	0.008242	0.104396	0.285714	0.384615	0.56044	0.041209	0.357143	0.626374	0.804945	0.994505	0.568681	0.391185	0.005495	0.288462	0.60989	0.799451	0.991758	0.43956
0.367089	0.341772	0.291139	0.192308	0.24359	0.179487	0.025316	0.240506	0.56962	0.721519	0.974684	0.050633	0.227848	0.379747	0.759494	1	0.012658	0.177215	0.417722	0.64557	0.898734	0.696203	0.21519	0.088608	0.102564	0.025641	0	0.012658	0.240506	0.518987	0.734177	1	0.139241	0.177215	0.265823	0.417722	0.670886	0.746835	0.746835	0.772152	0.797468	0.822785	0.443038	0.384615	0.063291	0.227848	0.405063	0.556962	0.898734	0.367089
0.354037	0.515528	0.130435	0.45625	0.06875	0.15625	0.018634	0.329193	0.627329	0.782609	0.981366	0.012422	0.204969	0.453416	0.732919	0.993789	0.006211	0.136646	0.360248	0.490683	1	1	0	0	0	0	0	0.006211	0.248447	0.496894	0.745342	1	0	0	0	0	0	0	0	0	0	0	0.291925	0.475	0.031056	0.198758	0.453416	0.714286	0.956522	0.552795
0.4	0.27907	0.32093	0.214953	0.247664	0.205607	0.023256	0.260465	0.539535	0.813953	1	0.013953	0.209302	0.460465	0.702326	0.948837	0.004651	0.251163	0.497674	0.711628	0.962791	0.446512	0.386047	0.167442	0.135514	0.060748	0.004673	0.004651	0.311628	0.6	0.813953	1	0.009302	0.27907	0.446512	0.623256	0.962791	0.069767	0.204651	0.246512	0.753488	0.930233	0.44186	0.392523	0.009302	0.232558	0.44186	0.67907	0.962791	0.297674
0.344086	0.333333	0.322581	0.282609	0.206522	0.304348	0.032258	0.290323	0.526882	0.698925	1	0.021505	0.215054	0.451613	0.83871	0.989247	0.010753	0.204301	0.483871	0.655914	0.946237	0.333333	0.365591	0.301075	0.130435	0.043478	0	0.010753	0.11828	0.419355	0.784946	1	0.053763	0.365591	0.698925	0.860215	0.956989	0.150538	0.215054	0.430108	0.505376	0.580645	0.526882	0.326087	0.053763	0.215054	0.397849	0.602151	0.946237	0.354839
0.376344	0.290323	0.333333	0.219424	0.26259	0.172662	0.007168	0.25448	0.494624	0.727599	0.978495	0.02509	0.243728	0.544803	0.777778	1	0.003584	0.240143	0.458781	0.709677	0.97491	0.387097	0.168459	0.444444	0.05036	0.086331	0	0.003584	0.193548	0.455197	0.698925	1	0.16129	0.258065	0.390681	0.591398	0.681004	0.007168	0.225806	0.498208	0.799283	0.960573	0.55914	0.417266	0.017921	0.243728	0.46595	0.666667	0.97491	0.297491
0.367089	0.299578	0.333333	0.182203	0.237288	0.224576	0.008439	0.223629	0.472574	0.797468	1	0.012658	0.244726	0.514768	0.755274	0.995781	0.004219	0.227848	0.489451	0.675105	0.991561	0.291139	0.042194	0.666667	0.021186	0.088983	0.004237	0.004219	0.392405	0.683544	0.805907	1	0.485232	0.489451	0.662447	0.670886	0.818565	0.012658	0.194093	0.409283	0.624473	0.987342	0.540084	0.372881	0.025316	0.303797	0.493671	0.662447	0.970464	0.362869
0.369892	0.331183	0.298925	0.243534	0.226293	0.193966	0.008602	0.230108	0.492473	0.8	0.993548	0.006452	0.268817	0.505376	0.731183	1	0.002151	0.232258	0.47957	0.703226	0.948387	0.384946	0.083871	0.531183	0.036638	0.105603	0.002155	0.002151	0.221505	0.391398	0.780645	1	0.064516	0.176344	0.251613	0.313978	0.417204	0.006452	0.402151	0.591398	0.76129	0.948387	0.541935	0.362069	0.004301	0.260215	0.47957	0.703226	0.948387	0.344086
0.378049	0.292683	0.329268	0.259259	0.209877	0.160494	0.04878	0.256098	0.487805	0.695122	0.95122	0.060976	0.146341	0.463415	0.792683	0.97561	0.012195	0.195122	0.47561	0.768293	1	0.353659	0.304878	0.341463	0.098765	0.074074	0	0.012195	0.329268	0.560976	0.829268	1	0.036585	0.268293	0.585366	0.658537	0.804878	0.121951	0.195122	0.426829	0.512195	0.939024	0.414634	0.518519	0.036585	0.158537	0.463415	0.646341	0.963415	0.304878
0.395105	0.347902	0.256993	0.276708	0.194396	0.206655	0.036713	0.211538	0.38986	0.706294	1	0.003497	0.269231	0.538462	0.77972	0.998252	0.001748	0.323427	0.554196	0.76049	0.996503	0.174825	0.054196	0.770979	0.019264	0.057793	0.005254	0.001748	0.512238	0.711538	0.840909	1	0.45979	0.486014	0.536713	0.91958	0.986014	0.006993	0.202797	0.398601	0.692308	0.996503	0.454545	0.392294	0.005245	0.403846	0.606643	0.800699	0.993007	0.367133
0.330855	0.360595	0.30855	0.208955	0.208955	0.227612	0.01487	0.178439	0.431227	0.70632	0.992565	0.007435	0.297398	0.546468	0.810409	1	0.003717	0.260223	0.505576	0.69145	0.98513	0.457249	0.200743	0.342007	0.093284	0.070896	0.011194	0.003717	0.289963	0.505576	0.851301	1	0.122677	0.315985	0.486989	0.672862	0.907063	0.011152	0.104089	0.449814	0.713755	0.914498	0.531599	0.395522	0.02974	0.315985	0.498141	0.69145	0.98513	0.405204
0.367021	0.295745	0.337234	0.216187	0.242812	0.201278	0.004255	0.224468	0.521277	0.75	1	0.002128	0.256383	0.457447	0.744681	0.998936	0.001064	0.265957	0.502128	0.746809	0.997872	0.380851	0.148936	0.470213	0.055378	0.080937	0.00213	0.001064	0.255319	0.524468	0.820213	1	0.12234	0.362766	0.706383	0.889362	0.970213	0.003191	0.157447	0.457447	0.632979	0.991489	0.510638	0.396166	0.005319	0.269149	0.478723	0.746809	0.997872	0.338298
0.433333	0.327381	0.239286	0.280095	0.1764	0.16329	0.004762	0.205952	0.466667	0.8	1	0.002381	0.27619	0.464286	0.733333	0.99881	0.00119	0.385714	0.557143	0.719048	0.991667	0.560714	0.105952	0.333333	0.039333	0.082241	0.003576	0.00119	0.17619	0.345238	0.732143	1	0.014286	0.470238	0.597619	0.704762	0.795238	0.036905	0.415476	0.582143	0.807143	0.997619	0.392857	0.297974	0.008333	0.40119	0.536905	0.709524	0.964286	0.392857
0.316384	0.384181	0.299435	0.249292	0.192635	0.209632	0.022599	0.268362	0.502825	0.731638	0.99435	0.00565	0.189266	0.480226	0.779661	0.997175	0.002825	0.265537	0.516949	0.734463	1	0.491525	0.163842	0.344633	0.073654	0.050992	0.011331	0.002825	0.29661	0.573446	0.841808	1	0.09887	0.305085	0.514124	0.607345	0.988701	0.025424	0.180791	0.364407	0.686441	0.943503	0.50565	0.402266	0.022599	0.20339	0.403955	0.672316	0.988701	0.403955
0.356223	0.424893	0.218884	0.301724	0.116379	0.206897	0.012876	0.141631	0.381974	0.785408	1	0.008584	0.317597	0.532189	0.716738	0.995708	0.004292	0.304721	0.51073	0.695279	0.905579	0.429185	0.175966	0.39485	0.068966	0.068966	0.008621	0.004292	0.107296	0.270386	0.575107	1	0.2103	0.27897	0.339056	0.523605	0.60515	0.193133	0.618026	0.751073	0.88412	0.982833	0.454936	0.327586	0.038627	0.351931	0.553648	0.678112	0.918455	0.450644
0.413793	0.275862	0.310345	0.207921	0.287129	0.20297	0.014778	0.231527	0.497537	0.763547	0.995074	0.068966	0.261084	0.502463	0.729064	1	0.004926	0.226601	0.463054	0.714286	0.955665	0.433498	0.438424	0.128079	0.118812	0.039604	0	0.004926	0.285714	0.576355	0.837438	1	0.009852	0.305419	0.463054	0.635468	0.881773	0.078818	0.103448	0.241379	0.660099	0.955665	0.428571	0.435644	0.014778	0.236453	0.44335	0.674877	0.8867	0.295567
0.332606	0.367503	0.299891	0.232533	0.20524	0.221616	0.004362	0.258451	0.507088	0.732824	1	0.002181	0.232279	0.529989	0.770992	0.997819	0.001091	0.245365	0.466739	0.726281	0.998909	0.417666	0.185387	0.396947	0.092795	0.076419	0.008734	0.001091	0.266085	0.544166	0.804798	0.996728	0.029444	0.220284	0.693566	0.865867	1	0.005453	0.25627	0.473282	0.603053	0.961832	0.502726	0.388646	0.005453	0.25627	0.454744	0.733915	0.996728	0.410033
0.392593	0.325926	0.281481	0.268657	0.238806	0.19403	0.014815	0.162963	0.37037	0.666667	0.992593	0.02963	0.348148	0.6	0.844444	0.977778	0.007407	0.259259	0.533333	0.733333	1	0.348148	0.2	0.451852	0.074627	0.074627	0	0.007407	0.140741	0.451852	0.77037	1	0.318519	0.355556	0.42963	0.511111	0.866667	0.037037	0.192593	0.57037	0.725926	0.962963	0.42963	0.298507	0.022222	0.340741	0.503704	0.8	0.985185	0.340741
0.327869	0.348361	0.32377	0.226337	0.218107	0.222222	0.032787	0.290984	0.487705	0.786885	0.995902	0.008197	0.233607	0.540984	0.692623	1	0.004098	0.168033	0.45082	0.737705	0.987705	0.536885	0.315574	0.147541	0.098765	0.032922	0.00823	0.004098	0.29918	0.545082	0.680328	1	0.012295	0.118852	0.344262	0.704918	0.848361	0.266393	0.409836	0.909836	0.946721	0.987705	0.54918	0.337449	0.016393	0.221311	0.512295	0.737705	0.987705	0.32377
0.382576	0.511364	0.106061	0.353612	0.095057	0.091255	0.015152	0.223485	0.575758	0.768939	0.996212	0.011364	0.253788	0.435606	0.69697	1	0.003788	0.227273	0.632576	0.715909	0.988636	0.931818	0.011364	0.056818	0.015209	0.015209	0	0.003788	0.231061	0.473485	0.734848	1	0.32197	0.32197	0.32197	0.325758	0.67803	0.704545	0.712121	0.727273	0.761364	0.776515	0.147727	0.205323	0.087121	0.594697	0.712121	0.859848	0.988636	0.492424
0.20283	0.584906	0.212264	0.186761	0.104019	0.219858	0.018868	0.15566	0.308962	0.455189	1	0.004717	0.391509	0.629717	0.799528	0.997642	0.002358	0.17217	0.34434	0.582547	0.995283	0.721698	0.125	0.153302	0.042553	0.047281	0	0.002358	0.398585	0.629717	0.818396	1	0.033019	0.108491	0.20283	0.308962	0.412736	0.018868	0.153302	0.28066	0.436321	0.775943	0.603774	0.335697	0.03066	0.339623	0.601415	0.778302	0.995283	0.549528
0.385925	0.360953	0.253121	0.252273	0.177273	0.184091	0.00454	0.284904	0.627696	0.819523	0.998865	0.00227	0.211124	0.473326	0.711691	0.99319	0.001135	0.250851	0.417707	0.62202	1	0.500568	0.112372	0.38706	0.045455	0.079545	0.006818	0.001135	0.160045	0.494892	0.816118	1	0.095346	0.273553	0.385925	0.497162	0.860386	0.111237	0.300795	0.54143	0.683314	0.979569	0.402951	0.320455	0.003405	0.22815	0.401816	0.587968	0.99546	0.38706
0.417949	0.384615	0.197436	0.291702	0.160821	0.144568	0.002564	0.189744	0.475214	0.715385	1	0.001709	0.246154	0.457265	0.724786	0.998291	0.000855	0.387179	0.582906	0.829915	0.999145	0.680342	0.123077	0.196581	0.051326	0.047904	0.003422	0.000855	0.201709	0.45812	0.717949	1	0.113675	0.406838	0.638462	0.907692	0.977778	0.11453	0.392308	0.511966	0.744444	0.994872	0.365812	0.328486	0.008547	0.37094	0.567521	0.84359	0.999145	0.429915
0.376623	0.285714	0.337662	0.200521	0.265625	0.195312	0.005195	0.184416	0.418182	0.724675	1	0.023377	0.335065	0.522078	0.742857	0.98961	0.002597	0.212987	0.501299	0.753247	0.997403	0.371429	0.228571	0.4	0.088542	0.072917	0	0.002597	0.288312	0.480519	0.792208	1	0.01039	0.187013	0.387013	0.607792	0.994805	0.051948	0.238961	0.581818	0.768831	0.979221	0.602597	0.411458	0.01039	0.301299	0.509091	0.742857	0.997403	0.322078
0.37	0.31	0.32	0.20202	0.262626	0.191919	0.1	0.24	0.47	0.69	0.98	0.03	0.21	0.53	0.83	1	0.01	0.22	0.41	0.68	0.97	0.46	0.54	0	0.181818	0	0	0.01	0.3	0.53	0.79	1	0.02	0.19	0.39	0.68	0.96	0	0	0	0	0	0.36	0.505051	0.02	0.2	0.42	0.7	0.97	0.24
0.306931	0.405941	0.287129	0.31	0.16	0.25	0.029703	0.188119	0.49505	0.722772	1	0.019802	0.247525	0.455446	0.732673	0.980198	0.009901	0.29703	0.50495	0.712871	0.950495	0.425743	0.376238	0.19802	0.11	0.05	0.01	0.009901	0.237624	0.445545	0.712871	1	0.039604	0.287129	0.60396	0.762376	0.920792	0.178218	0.217822	0.485149	0.534653	0.970297	0.49505	0.4	0.039604	0.29703	0.514851	0.792079	0.960396	0.415842
0.321513	0.420804	0.257683	0.263033	0.14455	0.222749	0.004728	0.385343	0.531915	0.756501	0.973995	0.007092	0.156028	0.371158	0.725768	1	0.002364	0.3026	0.536643	0.768322	0.997636	0.631206	0.101655	0.267139	0.106635	0.07346	0.00237	0.002364	0.200946	0.510638	0.747045	1	0.104019	0.189125	0.375887	0.607565	0.992908	0.047281	0.345154	0.503546	0.758865	0.983452	0.3026	0.50237	0.018913	0.27896	0.524823	0.754137	0.985816	0.439716
0.421505	0.337634	0.24086	0.297414	0.252155	0.155172	0.006452	0.27957	0.546237	0.744086	1	0.004301	0.24086	0.462366	0.812903	0.997849	0.002151	0.206452	0.445161	0.675269	0.888172	0.376344	0.139785	0.483871	0.034483	0.077586	0	0.002151	0.253763	0.470968	0.898925	1	0.008602	0.227957	0.275269	0.387097	0.494624	0.043011	0.296774	0.595699	0.746237	0.931183	0.372043	0.49569	0.008602	0.227957	0.453763	0.713978	0.980645	0.36129
0.275	0.435	0.29	0.234043	0.18398	0.255319	0.0025	0.25875	0.49875	0.7175	0.99875	0.005	0.25125	0.505	0.75875	1	0.00125	0.2275	0.48625	0.75375	0.9975	0.47375	0.24	0.28625	0.105131	0.060075	0.002503	0.00125	0.23125	0.48875	0.745	1	0.0375	0.195	0.41625	0.7975	0.9975	0.00625	0.3175	0.5375	0.69875	0.98875	0.57	0.397997	0.00375	0.2575	0.47	0.74	0.9975	0.4675
0.325967	0.314917	0.359116	0.183333	0.25	0.216667	0.016575	0.171271	0.364641	0.718232	0.977901	0.033149	0.342541	0.59116	0.723757	0.98895	0.005525	0.270718	0.458564	0.740331	1	0.486188	0.292818	0.220994	0.111111	0.055556	0	0.005525	0.237569	0.497238	0.696133	1	0.265193	0.342541	0.635359	0.823204	0.994475	0.099448	0.149171	0.226519	0.552486	0.872928	0.530387	0.411111	0.027624	0.375691	0.563536	0.78453	0.994475	0.337017
0.354015	0.237226	0.408759	0.135531	0.315018	0.179487	0.007299	0.218978	0.492701	0.79562	1	0.029197	0.29562	0.562044	0.726277	0.952555	0.00365	0.233577	0.448905	0.70438	0.99635	0.39781	0.178832	0.423358	0.051282	0.10989	0	0.00365	0.211679	0.463504	0.718978	1	0.142336	0.30292	0.39781	0.609489	0.70438	0.010949	0.255474	0.507299	0.813869	0.981752	0.540146	0.410256	0.029197	0.240876	0.478102	0.675182	0.99635	0.226277
0.342105	0.394737	0.263158	0.300885	0.230088	0.150442	0.052632	0.201754	0.491228	0.754386	0.973684	0.017544	0.27193	0.535088	0.780702	1	0.008772	0.192982	0.368421	0.561404	0.885965	0.473684	0.526316	0	0.159292	0	0	0.008772	0.377193	0.605263	0.789474	1	0.017544	0.184211	0.368421	0.640351	0.894737	0	0	0	0	0	0.350877	0.460177	0.017544	0.192982	0.429825	0.649123	0.903509	0.359649
0.442953	0.248322	0.308725	0.202703	0.290541	0.148649	0.020134	0.322148	0.449664	0.724832	1	0.013423	0.187919	0.456376	0.657718	0.993289	0.006711	0.214765	0.536913	0.791946	0.986577	0.322148	0.302013	0.375839	0.121622	0.054054	0.013514	0.006711	0.167785	0.577181	0.765101	1	0.026846	0.261745	0.624161	0.885906	0.986577	0.060403	0.322148	0.416107	0.510067	0.832215	0.402685	0.5	0.026846	0.221477	0.536913	0.758389	0.979866	0.275168
0.321839	0.385878	0.292282	0.230263	0.185855	0.246711	0.00821	0.211823	0.425287	0.727422	1	0.004926	0.26601	0.52381	0.760263	0.990148	0.001642	0.28243	0.520525	0.73399	0.996716	0.612479	0.17734	0.210181	0.082237	0.069079	0	0.001642	0.275862	0.484401	0.773399	1	0.004926	0.254516	0.558292	0.740558	0.996716	0.027915	0.18555	0.464696	0.720854	0.850575	0.45156	0.365132	0.003284	0.298851	0.558292	0.816092	0.996716	0.367816
0.451282	0.317949	0.230769	0.319588	0.170103	0.154639	0.010256	0.312821	0.6	0.789744	1	0.015385	0.271795	0.502564	0.758974	0.989744	0.005128	0.184615	0.34359	0.512821	0.979487	0.74359	0.158974	0.097436	0.072165	0.051546	0.010309	0.005128	0.297436	0.6	0.805128	1	0.148718	0.220513	0.353846	0.420513	0.851282	0.05641	0.071795	0.138462	0.569231	0.641026	0.34359	0.268041	0.020513	0.169231	0.312821	0.507692	0.897436	0.374359
0.359081	0.335073	0.305846	0.238245	0.212121	0.211076	0.003132	0.228601	0.461378	0.713987	1	0.004175	0.245303	0.505219	0.755741	0.998956	0.001044	0.276618	0.524008	0.77453	0.997912	0.460334	0.228601	0.311065	0.08255	0.059561	0.007315	0.001044	0.267223	0.461378	0.740084	1	0.006263	0.308977	0.512526	0.7881	0.968685	0.009395	0.192067	0.605428	0.755741	0.878914	0.530271	0.342738	0.007307	0.262004	0.524008	0.742171	0.982255	0.348643
0.307407	0.333333	0.359259	0.193309	0.230483	0.215613	0.007407	0.214815	0.47037	0.762963	0.996296	0.011111	0.225926	0.459259	0.714815	0.992593	0.003704	0.262963	0.514815	0.759259	1	0.511111	0.255556	0.233333	0.089219	0.05948	0	0.003704	0.207407	0.414815	0.722222	1	0.17037	0.27037	0.551852	0.774074	0.914815	0.051852	0.111111	0.5	0.82963	0.992593	0.537037	0.342007	0.014815	0.337037	0.548148	0.759259	0.985185	0.385185
0.365854	0.349593	0.284553	0.270492	0.172131	0.188525	0.02439	0.170732	0.414634	0.780488	0.99187	0.01626	0.227642	0.471545	0.707317	0.96748	0.00813	0.300813	0.528455	0.813008	1	0.463415	0.292683	0.243902	0.114754	0.065574	0.016393	0.00813	0.252033	0.471545	0.772358	1	0.276423	0.520325	0.626016	0.869919	0.96748	0.105691	0.154472	0.227642	0.430894	0.756098	0.504065	0.311475	0.089431	0.292683	0.528455	0.699187	0.96748	0.333333
0.445321	0.296505	0.258174	0.231377	0.215576	0.170429	0.003382	0.229989	0.43292	0.721533	0.997745	0.002255	0.285231	0.551297	0.759865	0.998873	0.001127	0.275085	0.532131	0.770011	1	0.478016	0.19053	0.331454	0.072235	0.085779	0.002257	0.001127	0.207441	0.473506	0.737317	1	0.003382	0.290868	0.543405	0.782413	0.989853	0.016911	0.310034	0.51071	0.723788	0.978579	0.383315	0.31377	0.002255	0.29876	0.528749	0.776776	0.990981	0.337091
0.400283	0.404526	0.195191	0.303116	0.148725	0.11898	0.004243	0.280057	0.437058	0.704385	1	0.002829	0.186704	0.424328	0.721358	0.998586	0.001414	0.490806	0.681754	0.838755	0.984441	0.591231	0.11174	0.29703	0.048159	0.073654	0.008499	0.001414	0.248939	0.408769	0.653465	1	0.015559	0.509194	0.623762	0.717115	0.902405	0.008487	0.189533	0.660537	0.826025	0.988685	0.417256	0.29745	0.009901	0.492221	0.663366	0.820368	0.990099	0.473833
0.410345	0.258621	0.331034	0.197232	0.276817	0.16263	0.006897	0.341379	0.544828	0.782759	1	0.010345	0.12069	0.37931	0.675862	0.910345	0.003448	0.248276	0.451724	0.765517	0.996552	0.396552	0.251724	0.351724	0.083045	0.062284	0	0.003448	0.203448	0.482759	0.631034	1	0.013793	0.17931	0.496552	0.775862	0.944828	0.055172	0.344828	0.544828	0.696552	0.993103	0.565517	0.366782	0.010345	0.210345	0.465517	0.713793	0.993103	0.265517
0.333333	0.375	0.291667	0.219895	0.225131	0.230366	0.010417	0.270833	0.479167	0.729167	1	0.046875	0.255208	0.541667	0.744792	0.96875	0.005208	0.166667	0.458333	0.807292	0.994792	0.572917	0.385417	0.041667	0.120419	0.015707	0.005236	0.005208	0.317708	0.598958	0.739583	1	0.015625	0.161458	0.4375	0.817708	0.984375	0.28125	0.286458	0.296875	0.307292	0.5625	0.552083	0.397906	0.010417	0.21875	0.541667	0.765625	0.979167	0.364583
0.397516	0.31677	0.285714	0.2125	0.20625	0.2	0.018634	0.167702	0.391304	0.602484	1	0.012422	0.229814	0.583851	0.850932	0.987578	0.006211	0.310559	0.596273	0.763975	0.993789	0.515528	0.15528	0.329193	0.075	0.0875	0	0.006211	0.267081	0.602484	0.857143	1	0.180124	0.571429	0.677019	0.732919	0.981366	0.018634	0.142857	0.329193	0.453416	0.78882	0.459627	0.325	0.080745	0.360248	0.614907	0.751553	0.981366	0.304348
0.308707	0.426121	0.265172	0.241744	0.147952	0.244386	0.01847	0.257256	0.505277	0.774406	1	0.002639	0.234828	0.536939	0.773087	0.997361	0.001319	0.244063	0.437995	0.668865	0.996042	0.530343	0.139842	0.329815	0.059445	0.064729	0.001321	0.001319	0.224274	0.565963	0.864116	1	0.005277	0.275726	0.42876	0.576517	0.980211	0.025066	0.262533	0.478892	0.651715	0.832454	0.493404	0.346103	0.005277	0.275726	0.485488	0.700528	0.996042	0.465699
0.311239	0.380403	0.308357	0.24531	0.151515	0.251082	0.004323	0.259366	0.505764	0.769452	1	0.002882	0.262248	0.534582	0.755043	0.997118	0.001441	0.223343	0.458213	0.71902	0.962536	0.476945	0.231988	0.291066	0.079365	0.056277	0.004329	0.001441	0.211816	0.43804	0.817003	1	0.025937	0.148415	0.423631	0.827089	0.933718	0.021614	0.40634	0.587896	0.736311	0.814121	0.518732	0.334776	0.014409	0.262248	0.471182	0.713256	0.933718	0.365994
0.412371	0.28866	0.298969	0.197917	0.21875	0.260417	0.030928	0.195876	0.42268	0.701031	0.979381	0.020619	0.268041	0.536082	0.783505	0.989691	0.010309	0.319588	0.515464	0.721649	1	0.216495	0	0.783505	0	0.0625	0	0.010309	0.453608	0.71134	0.762887	1	0	0	0	0	0	0.041237	0.226804	0.42268	0.670103	0.948454	0.309278	0.395833	0.061856	0.319588	0.56701	0.721649	0.969072	0.278351
0.454545	0.222222	0.323232	0.244898	0.357143	0.081633	0.020202	0.252525	0.454545	0.727273	1	0.030303	0.333333	0.565657	0.666667	0.949495	0.010101	0.171717	0.383838	0.777778	0.979798	0.353535	0.272727	0.373737	0.081633	0.061224	0	0.010101	0.080808	0.434343	0.626263	1	0.10101	0.151515	0.525253	0.646465	0.717172	0.242424	0.323232	0.757576	0.848485	0.979798	0.484848	0.428571	0.050505	0.222222	0.555556	0.777778	0.979798	0.161616
0.310526	0.373684	0.315789	0.216931	0.195767	0.306878	0.042105	0.142105	0.426316	0.694737	0.973684	0.010526	0.242105	0.521053	0.726316	1	0.005263	0.294737	0.510526	0.773684	0.994737	0.373684	0.273684	0.352632	0.079365	0.100529	0.005291	0.005263	0.205263	0.531579	0.810526	1	0.142105	0.268421	0.357895	0.815789	0.931579	0.031579	0.110526	0.489474	0.7	0.863158	0.452632	0.42328	0.036842	0.278947	0.521053	0.763158	0.978947	0.389474
0.4	0.314286	0.285714	0.318841	0.246377	0.173913	0.042857	0.342857	0.642857	0.828571	1	0.028571	0.171429	0.442857	0.628571	0.985714	0.014286	0.142857	0.414286	0.614286	0.9	0.457143	0.171429	0.371429	0.144928	0.086957	0	0.014286	0.157143	0.342857	0.628571	1	0.042857	0.085714	0.3	0.414286	0.457143	0.5	0.571429	0.785714	0.871429	0.971429	0.357143	0.434783	0.057143	0.214286	0.328571	0.571429	0.9	0.342857
0.372549	0.372549	0.254902	0.254042	0.17321	0.196305	0.009227	0.258362	0.465975	0.677047	0.994233	0.00346	0.205306	0.487889	0.749712	0.99654	0.001153	0.262976	0.625144	0.802768	1	0.670127	0.132641	0.197232	0.051963	0.045035	0.003464	0.001153	0.282584	0.457901	0.659746	1	0.094579	0.638985	0.753172	0.844291	0.998847	0.002307	0.069204	0.138408	0.775087	0.990773	0.286044	0.232102	0.00692	0.132641	0.707036	0.846597	1	0.400231
0.431373	0.313725	0.254902	0.257426	0.257426	0.128713	0.019608	0.22549	0.45098	0.803922	0.990196	0.039216	0.323529	0.568627	0.696078	1	0.009804	0.137255	0.470588	0.77451	0.95098	0.264706	0.460784	0.27451	0.079208	0.039604	0	0.009804	0.147059	0.784314	0.931373	1	0.019608	0.362745	0.480392	0.617647	0.901961	0.156863	0.215686	0.284314	0.705882	0.77451	0.470588	0.39604	0.039216	0.215686	0.480392	0.696078	0.892157	0.323529
0.346908	0.315234	0.337858	0.21148	0.238671	0.234139	0.003017	0.269985	0.552036	0.775264	0.996983	0.004525	0.199095	0.434389	0.707391	1	0.001508	0.28356	0.514329	0.745098	0.998492	0.411765	0.162896	0.425339	0.070997	0.070997	0.004532	0.001508	0.26546	0.496229	0.822021	1	0.003017	0.182504	0.377074	0.886878	0.998492	0.027149	0.248869	0.527903	0.671192	0.924585	0.544495	0.392749	0.004525	0.250377	0.475113	0.711916	0.998492	0.33635
0.422907	0.273128	0.303965	0.247788	0.252212	0.176991	0.039648	0.281938	0.550661	0.837004	1	0.035242	0.264317	0.497797	0.665198	0.929515	0.004405	0.15859	0.405286	0.660793	0.982379	0.370044	0.246696	0.38326	0.088496	0.079646	0	0.004405	0.237885	0.488987	0.85022	1	0.008811	0.123348	0.436123	0.612335	0.955947	0.101322	0.334802	0.585903	0.779736	0.903084	0.480176	0.460177	0.008811	0.246696	0.471366	0.665198	0.982379	0.299559
0.214953	0.649533	0.135514	0.253521	0.089202	0.131455	0.014019	0.135514	0.299065	0.626168	1	0.009346	0.369159	0.565421	0.733645	0.995327	0.004673	0.116822	0.257009	0.747664	0.976636	0.780374	0.163551	0.056075	0.084507	0.018779	0.00939	0.004673	0.378505	0.574766	0.794393	1	0.046729	0.079439	0.168224	0.280374	0.859813	0.009346	0.018692	0.17757	0.308411	0.32243	0.635514	0.319249	0.023364	0.359813	0.584112	0.761682	0.976636	0.668224
0.464103	0.310256	0.225641	0.275064	0.195373	0.151671	0.007692	0.292308	0.551282	0.771795	1	0.005128	0.212821	0.441026	0.725641	0.997436	0.002564	0.238462	0.45641	0.717949	0.946154	0.497436	0.158974	0.34359	0.071979	0.061697	0	0.002564	0.202564	0.446154	0.764103	1	0.007692	0.323077	0.5	0.689744	0.866667	0.048718	0.248718	0.584615	0.728205	0.928205	0.346154	0.359897	0.010256	0.238462	0.464103	0.725641	0.992308	0.317949
0.26025	0.499109	0.240642	0.233929	0.125	0.241071	0.017825	0.253119	0.474153	0.782531	1	0.00713	0.272727	0.520499	0.71836	0.998217	0.001783	0.226381	0.465241	0.787879	0.994652	0.705882	0.135472	0.158645	0.060714	0.053571	0.003571	0.001783	0.301248	0.527629	0.734403	1	0.131907	0.279857	0.547237	0.809269	0.894831	0.051693	0.160428	0.286988	0.782531	0.973262	0.568627	0.346429	0.01426	0.276292	0.515152	0.766488	0.998217	0.486631
0.367758	0.269521	0.36272	0.204545	0.262626	0.194444	0.007557	0.198992	0.438287	0.725441	1	0.020151	0.241814	0.534005	0.763224	0.994962	0.002519	0.292191	0.508816	0.778338	0.997481	0.413098	0.100756	0.486146	0.045455	0.09596	0.010101	0.002519	0.168766	0.460957	0.707809	1	0.11335	0.559194	0.70529	0.861461	0.957179	0.007557	0.282116	0.443325	0.730479	0.984887	0.478589	0.368687	0.005038	0.370277	0.576826	0.793451	0.984887	0.304786
0.333333	0.303571	0.363095	0.191045	0.256716	0.235821	0.008929	0.264881	0.5	0.776786	0.991071	0.005952	0.241071	0.485119	0.744048	1	0.002976	0.232143	0.494048	0.705357	0.988095	0.458333	0.145833	0.395833	0.071642	0.065672	0	0.002976	0.270833	0.592262	0.782738	1	0.008929	0.235119	0.357143	0.6875	0.934524	0.044643	0.151786	0.473214	0.636905	0.991071	0.565476	0.346269	0.005952	0.247024	0.479167	0.705357	0.988095	0.318452
0.351946	0.368866	0.279188	0.262712	0.205085	0.20678	0.003384	0.169205	0.423012	0.690355	0.998308	0.006768	0.307953	0.558376	0.778342	1	0.001692	0.277496	0.507614	0.771574	0.98308	0.516074	0.245347	0.238579	0.09661	0.049153	0.005085	0.001692	0.260575	0.519459	0.763113	1	0.093063	0.279188	0.467005	0.780034	0.984772	0.01692	0.179357	0.582064	0.725888	0.947547	0.509306	0.359322	0.015228	0.331641	0.546531	0.783418	0.986464	0.387479
0.375	0.291667	0.333333	0.221053	0.305263	0.178947	0.020833	0.260417	0.5	0.6875	0.979167	0.03125	0.1875	0.479167	0.791667	0.989583	0.010417	0.229167	0.489583	0.739583	1	0.4375	0.302083	0.260417	0.126316	0.063158	0	0.010417	0.239583	0.635417	0.78125	1	0.260417	0.520833	0.59375	0.822917	0.958333	0.03125	0.145833	0.208333	0.416667	0.489583	0.375	0.442105	0.041667	0.208333	0.479167	0.75	0.96875	0.302083
0.360759	0.316456	0.322785	0.229299	0.242038	0.197452	0.018987	0.234177	0.468354	0.753165	0.993671	0.012658	0.208861	0.518987	0.71519	1	0.006329	0.265823	0.474684	0.746835	0.987342	0.341772	0.139241	0.518987	0.050955	0.089172	0.012739	0.006329	0.082278	0.436709	0.721519	1	0.462025	0.487342	0.544304	0.949367	0.987342	0.126582	0.265823	0.417722	0.734177	0.943038	0.481013	0.458599	0.044304	0.278481	0.550633	0.759494	0.987342	0.291139
0.4	0.372222	0.227778	0.27933	0.206704	0.167598	0.011111	0.211111	0.455556	0.705556	1	0.05	0.261111	0.444444	0.755556	0.988889	0.005556	0.377778	0.577778	0.738889	0.961111	0.561111	0.166667	0.272222	0.061453	0.061453	0.01676	0.005556	0.216667	0.361111	0.522222	1	0.094444	0.533333	0.744444	0.8	0.933333	0.016667	0.444444	0.65	0.866667	0.988889	0.361111	0.379888	0.033333	0.338889	0.466667	0.727778	0.933333	0.377778
0.351906	0.430108	0.217986	0.273973	0.144814	0.196673	0.00391	0.26784	0.491691	0.769306	0.997067	0.001955	0.244379	0.504399	0.740958	1	0.000978	0.230694	0.486804	0.737048	0.999022	0.69697	0.063539	0.239492	0.029354	0.056751	0.001957	0.000978	0.246334	0.499511	0.721408	1	0.061584	0.384164	0.57869	0.907136	0.979472	0.006843	0.213099	0.435973	0.750733	0.998045	0.312805	0.348337	0.005865	0.220919	0.496579	0.753666	0.99609	0.484848
0.417219	0.241722	0.34106	0.202658	0.272425	0.169435	0.009934	0.221854	0.506623	0.748344	1	0.006623	0.321192	0.519868	0.705298	0.993377	0.003311	0.231788	0.453642	0.751656	0.990066	0.519868	0.304636	0.175497	0.109635	0.049834	0.009967	0.003311	0.251656	0.44702	0.778146	1	0.006623	0.304636	0.586093	0.745033	0.963576	0.029801	0.096026	0.387417	0.539735	0.993377	0.509934	0.358804	0.013245	0.31457	0.503311	0.774834	0.990066	0.228477
0.36534	0.393443	0.241218	0.248535	0.173505	0.203986	0.004684	0.277518	0.514052	0.74356	0.998829	0.002342	0.208431	0.429742	0.713115	0.991803	0.001171	0.272834	0.537471	0.797424	1	0.586651	0.118267	0.295082	0.059789	0.071512	0.008206	0.001171	0.201405	0.409836	0.668618	1	0.016393	0.144028	0.377049	0.567916	0.980094	0.070258	0.482436	0.741218	0.855972	0.996487	0.352459	0.361079	0.016393	0.192037	0.47541	0.795082	0.994145	0.400468
0.462451	0.359684	0.177866	0.345238	0.150794	0.107143	0.011858	0.209486	0.466403	0.747036	1	0.007905	0.316206	0.533597	0.727273	0.988142	0.003953	0.193676	0.347826	0.743083	0.956522	0.758893	0.146245	0.094862	0.047619	0.031746	0.015873	0.003953	0.312253	0.549407	0.73913	1	0.106719	0.150198	0.201581	0.324111	0.391304	0.245059	0.379447	0.841897	0.865613	0.928854	0.343874	0.293651	0.110672	0.241107	0.43083	0.798419	0.956522	0.367589
0.304348	0.481884	0.213768	0.341818	0.123636	0.192727	0.01087	0.231884	0.492754	0.807971	0.978261	0.007246	0.26087	0.543478	0.789855	1	0.003623	0.23913	0.405797	0.586957	0.869565	0.344203	0.083333	0.572464	0.043636	0.101818	0	0.003623	0.166667	0.442029	0.793478	1	0.413043	0.706522	0.75	0.778986	0.98913	0.050725	0.26087	0.467391	0.637681	0.931159	0.445652	0.334545	0.050725	0.23913	0.416667	0.630435	0.981884	0.48913
0.393777	0.378755	0.227468	0.276047	0.167562	0.166488	0.002146	0.22103	0.453863	0.759657	1	0.006438	0.265021	0.498927	0.762876	0.995708	0.001073	0.362661	0.531116	0.712446	0.993562	0.533262	0.100858	0.36588	0.038668	0.079484	0.004296	0.001073	0.201717	0.378755	0.727468	1	0.045064	0.403433	0.555794	0.684549	0.767167	0.01073	0.374464	0.567597	0.804721	0.966738	0.407725	0.322234	0.022532	0.370172	0.519313	0.712446	0.993562	0.4603
0.385185	0.318519	0.296296	0.231343	0.201493	0.179104	0.02963	0.288889	0.496296	0.733333	0.97037	0.022222	0.222222	0.562963	0.888889	1	0.007407	0.251852	0.437037	0.651852	0.955556	0.459259	0.133333	0.407407	0.044776	0.089552	0	0.007407	0.207407	0.437037	0.881481	1	0.244444	0.266667	0.362963	0.392593	0.666667	0.059259	0.17037	0.525926	0.748148	0.851852	0.414815	0.328358	0.044444	0.348148	0.496296	0.666667	0.962963	0.340741
0.394937	0.263291	0.341772	0.19797	0.291878	0.208122	0.005063	0.227848	0.475949	0.764557	1	0.012658	0.298734	0.577215	0.75443	0.989873	0.002532	0.225316	0.470886	0.726582	0.994937	0.321519	0.270886	0.407595	0.083756	0.068528	0.002538	0.002532	0.227848	0.546835	0.751899	1	0.106329	0.35443	0.473418	0.610127	0.918987	0.005063	0.255696	0.524051	0.855696	0.994937	0.493671	0.390863	0.010127	0.286076	0.526582	0.729114	0.994937	0.278481
0.359195	0.304598	0.336207	0.227666	0.239193	0.195965	0.017241	0.198276	0.465517	0.692529	0.997126	0.005747	0.247126	0.528736	0.775862	1	0.002874	0.264368	0.485632	0.747126	0.979885	0.347701	0.106322	0.545977	0.040346	0.080692	0.005764	0.002874	0.284483	0.471264	0.718391	1	0.393678	0.485632	0.738506	0.824713	0.933908	0.008621	0.206897	0.454023	0.706897	0.994253	0.534483	0.37464	0.008621	0.341954	0.551724	0.784483	0.991379	0.324713
0.288298	0.511702	0.2	0.266241	0.134185	0.15655	0.007447	0.190426	0.412766	0.617021	0.994681	0.002128	0.344681	0.629787	0.819149	1	0.001064	0.140426	0.393617	0.601064	0.998936	0.741489	0.034043	0.224468	0.021299	0.055378	0	0.001064	0.345745	0.6	0.806383	1	0.026596	0.243617	0.296809	0.43617	0.989362	0.008511	0.075532	0.152128	0.473404	0.974468	0.502128	0.342918	0.004255	0.401064	0.665957	0.852128	0.995745	0.496809
0.315789	0.368421	0.315789	0.166667	0.204545	0.212121	0.015038	0.225564	0.503759	0.789474	1	0.022556	0.285714	0.473684	0.729323	0.992481	0.007519	0.210526	0.511278	0.699248	0.984962	0.368421	0.240602	0.390977	0.068182	0.083333	0.007576	0.007519	0.270677	0.451128	0.87218	1	0.052632	0.293233	0.390977	0.488722	0.714286	0.142857	0.233083	0.601504	0.789474	0.962406	0.413534	0.393939	0.030075	0.18797	0.413534	0.616541	0.857143	0.360902
0.391129	0.403226	0.205645	0.275304	0.190283	0.161943	0.012097	0.306452	0.540323	0.790323	1	0.008065	0.165323	0.5	0.717742	0.959677	0.004032	0.262097	0.423387	0.725806	0.979839	0.762097	0.104839	0.133065	0.040486	0.040486	0	0.004032	0.217742	0.560484	0.75	1	0.048387	0.185484	0.294355	0.350806	0.459677	0.221774	0.25	0.391129	0.895161	0.991935	0.407258	0.380567	0.016129	0.193548	0.395161	0.649194	0.979839	0.483871
0.372671	0.304348	0.322981	0.225	0.19375	0.25	0.018634	0.192547	0.42236	0.726708	1	0.012422	0.223602	0.496894	0.751553	0.987578	0.006211	0.279503	0.540373	0.745342	0.956522	0.428571	0.15528	0.416149	0.0625	0.0625	0	0.006211	0.130435	0.341615	0.677019	1	0.248447	0.279503	0.453416	0.490683	0.757764	0.024845	0.509317	0.614907	0.832298	0.937888	0.403727	0.425	0.031056	0.291925	0.540373	0.745342	0.956522	0.329193
0.338742	0.35497	0.306288	0.227642	0.195122	0.215447	0.008114	0.269777	0.537525	0.770791	0.995943	0.010142	0.298174	0.525355	0.750507	0.997972	0.002028	0.156187	0.40568	0.713996	1	0.46856	0.125761	0.40568	0.050813	0.103659	0.006098	0.002028	0.25355	0.614604	0.8357	1	0.004057	0.085193	0.31643	0.490872	0.975659	0.05071	0.275862	0.496957	0.636917	0.914807	0.513185	0.406504	0.006085	0.206897	0.413793	0.616633	0.993915	0.389452
0.306306	0.441441	0.252252	0.257919	0.158371	0.262443	0.009009	0.27027	0.522523	0.743243	0.995495	0.013514	0.234234	0.468468	0.707207	1	0.004505	0.225225	0.527027	0.806306	0.981982	0.761261	0.126126	0.112613	0.049774	0.040724	0.004525	0.004505	0.297297	0.486486	0.702703	1	0.036036	0.509009	0.797297	0.837838	0.927928	0.045045	0.067568	0.112613	0.252252	0.981982	0.333333	0.334842	0.027027	0.234234	0.522523	0.797297	0.981982	0.495495
0.270833	0.34375	0.385417	0.2	0.221053	0.284211	0.020833	0.166667	0.364583	0.614583	0.979167	0.041667	0.25	0.552083	0.71875	0.96875	0.010417	0.28125	0.5	0.802083	1	0.46875	0.322917	0.208333	0.147368	0.042105	0	0.010417	0.229167	0.614583	0.84375	1	0.041667	0.270833	0.552083	0.78125	0.90625	0.125	0.166667	0.354167	0.40625	0.458333	0.34375	0.378947	0.041667	0.1875	0.416667	0.5625	0.927083	0.260417
0.320388	0.383495	0.296117	0.253659	0.239024	0.214634	0.029126	0.26699	0.480583	0.728155	1	0.009709	0.199029	0.538835	0.868932	0.995146	0.004854	0.262136	0.456311	0.669903	0.864078	0.398058	0.446602	0.15534	0.126829	0.058537	0	0.004854	0.276699	0.558252	0.81068	1	0.019417	0.300971	0.480583	0.621359	0.859223	0.082524	0.116505	0.257282	0.917476	0.990291	0.412621	0.429268	0.024272	0.257282	0.441748	0.65534	0.864078	0.432039
0.321918	0.452055	0.226027	0.275862	0.17931	0.186207	0.020548	0.171233	0.472603	0.753425	0.993151	0.013699	0.205479	0.452055	0.691781	1	0.006849	0.383562	0.568493	0.746575	0.958904	0.363014	0.342466	0.294521	0.048276	0.048276	0.02069	0.006849	0.089041	0.191781	0.5	1	0.10274	0.69863	0.787671	0.883562	0.972603	0.226027	0.363014	0.465753	0.575342	0.691781	0.438356	0.372414	0.109589	0.349315	0.547945	0.767123	0.958904	0.452055
0.277027	0.405405	0.317568	0.258503	0.163265	0.285714	0.033784	0.175676	0.371622	0.662162	0.986486	0.013514	0.358108	0.533784	0.783784	0.993243	0.006757	0.202703	0.506757	0.716216	1	0.445946	0.256757	0.297297	0.081633	0.054422	0.013605	0.006757	0.216216	0.452703	0.797297	1	0.175676	0.263514	0.689189	0.824324	0.97973	0.060811	0.128378	0.5	0.594595	0.668919	0.655405	0.244898	0.060811	0.331081	0.540541	0.716216	0.97973	0.358108
0.405882	0.314706	0.279412	0.225331	0.200295	0.181149	0.005882	0.158824	0.438235	0.732353	1	0.002941	0.289706	0.514706	0.760294	0.992647	0.001471	0.364706	0.557353	0.744118	0.998529	0.491176	0.127941	0.380882	0.045655	0.07511	0.007364	0.001471	0.183824	0.377941	0.739706	1	0.126471	0.426471	0.577941	0.714706	0.926471	0.004412	0.348529	0.529412	0.801471	0.997059	0.427941	0.324006	0.007353	0.385294	0.545588	0.738235	0.997059	0.351471
0.302752	0.426606	0.270642	0.225806	0.179724	0.207373	0.009174	0.169725	0.449541	0.747706	0.958716	0.018349	0.238532	0.444954	0.711009	0.995413	0.004587	0.334862	0.56422	0.793578	1	0.582569	0.256881	0.16055	0.078341	0.032258	0.004608	0.004587	0.233945	0.440367	0.738532	1	0.266055	0.472477	0.573394	0.83945	0.940367	0.12844	0.16055	0.201835	0.637615	0.889908	0.46789	0.35023	0.142202	0.330275	0.573394	0.770642	0.990826	0.444954
0.325815	0.333333	0.340852	0.231156	0.223618	0.211055	0.007519	0.265664	0.513784	0.746867	1	0.005013	0.20802	0.518797	0.749373	0.997494	0.002506	0.225564	0.458647	0.736842	0.989975	0.338346	0.150376	0.511278	0.080402	0.095477	0.005025	0.002506	0.20802	0.54386	0.802005	1	0.045113	0.288221	0.538847	0.949875	0.992481	0.010025	0.26817	0.453634	0.714286	0.889724	0.596491	0.366834	0.012531	0.24812	0.471178	0.671679	0.987469	0.340852
0.393832	0.362487	0.24368	0.276682	0.186141	0.190693	0.001517	0.276036	0.538928	0.778564	1	0.001011	0.216886	0.444894	0.716886	0.999494	0.000506	0.258847	0.508595	0.748736	0.9909	0.623357	0.141557	0.235086	0.065756	0.073849	0.011128	0.000506	0.212336	0.470172	0.735086	1	0.035389	0.362993	0.502528	0.77907	0.979272	0.042467	0.33367	0.538423	0.786148	0.997978	0.350354	0.363177	0.003033	0.217897	0.479272	0.72093	0.992417	0.394338
0.265152	0.390152	0.344697	0.235741	0.174905	0.315589	0.018939	0.227273	0.560606	0.82197	0.992424	0.007576	0.295455	0.511364	0.80303	1	0.003788	0.204545	0.412879	0.628788	0.981061	0.496212	0.348485	0.155303	0.102662	0.064639	0.003802	0.003788	0.314394	0.579545	0.863636	1	0.011364	0.246212	0.409091	0.602273	0.962121	0.05303	0.094697	0.511364	0.768939	0.82197	0.481061	0.418251	0.011364	0.261364	0.454545	0.625	0.981061	0.412879
0.34492	0.262032	0.393048	0.168901	0.262735	0.22252	0.008021	0.205882	0.47861	0.745989	1	0.005348	0.256684	0.524064	0.735294	0.991979	0.002674	0.26738	0.516043	0.740642	0.994652	0.275401	0.181818	0.542781	0.058981	0.053619	0.021448	0.002674	0.259358	0.435829	0.794118	1	0.058824	0.360963	0.516043	0.820856	0.935829	0.010695	0.165775	0.5	0.673797	0.991979	0.502674	0.434316	0.010695	0.237968	0.441176	0.71123	0.989305	0.197861
0.284404	0.449541	0.266055	0.271889	0.175115	0.235023	0.013761	0.243119	0.53211	0.738532	1	0.009174	0.215596	0.5	0.798165	0.986239	0.004587	0.233945	0.477064	0.674312	0.894495	0.440367	0.408257	0.151376	0.110599	0.036866	0	0.004587	0.266055	0.545872	0.779817	1	0.018349	0.302752	0.472477	0.623853	0.857798	0.082569	0.114679	0.247706	0.908257	0.949541	0.412844	0.442396	0.022936	0.243119	0.440367	0.655963	0.922018	0.454128
0.319392	0.319392	0.361217	0.183206	0.248092	0.236641	0.007605	0.258555	0.520913	0.78327	1	0.011407	0.212928	0.441065	0.730038	0.992395	0.003802	0.26616	0.490494	0.722433	0.980989	0.368821	0.18251	0.448669	0.053435	0.091603	0	0.003802	0.159696	0.406844	0.669202	1	0.13308	0.30038	0.395437	0.608365	0.703422	0.030418	0.26616	0.520913	0.825095	0.988593	0.562738	0.412214	0.015209	0.235741	0.467681	0.673004	0.980989	0.323194
0.313433	0.380597	0.30597	0.233083	0.18797	0.157895	0.037313	0.238806	0.567164	0.761194	0.985075	0.029851	0.261194	0.440299	0.649254	0.977612	0.007463	0.179104	0.514925	0.738806	1	0.574627	0.350746	0.074627	0.225564	0.030075	0	0.007463	0.261194	0.477612	0.746269	1	0.014925	0.149254	0.410448	0.604478	0.992537	0.873134	0.880597	0.925373	0.940299	0.962687	0.5	0.345865	0.044776	0.253731	0.552239	0.738806	0.970149	0.425373
0.318681	0.412088	0.269231	0.287293	0.176796	0.259669	0.016484	0.274725	0.604396	0.796703	0.983516	0.010989	0.208791	0.43956	0.730769	1	0.005495	0.214286	0.467033	0.675824	0.950549	0.39011	0.406593	0.203297	0.154696	0.033149	0	0.005495	0.214286	0.571429	0.868132	1	0.016484	0.159341	0.472527	0.659341	0.961538	0.335165	0.379121	0.428571	0.796703	0.851648	0.461538	0.464088	0.032967	0.373626	0.510989	0.697802	0.950549	0.450549
0.284615	0.415385	0.3	0.224806	0.224806	0.263566	0.030769	0.215385	0.430769	0.646154	0.969231	0.015385	0.269231	0.530769	0.792308	1	0.007692	0.2	0.523077	0.730769	0.992308	0.315385	0.492308	0.192308	0.093023	0.046512	0	0.007692	0.107692	0.323077	0.746154	1	0.061538	0.246154	0.461538	0.6	0.723077	0.3	0.776923	0.823077	0.869231	0.953846	0.469231	0.418605	0.038462	0.238462	0.530769	0.730769	0.946154	0.430769
0.397436	0.333333	0.269231	0.245161	0.141935	0.180645	0.019231	0.205128	0.416667	0.839744	0.987179	0.012821	0.224359	0.532051	0.724359	0.99359	0.00641	0.282051	0.519231	0.666667	1	0.294872	0.115385	0.589744	0.03871	0.103226	0	0.00641	0.173077	0.448718	0.673077	1	0.467949	0.487179	0.660256	0.775641	0.807692	0.038462	0.275641	0.429487	0.833333	0.987179	0.442308	0.348387	0.089744	0.384615	0.551282	0.711538	0.980769	0.346154
0.372093	0.302326	0.325581	0.341176	0.211765	0.176471	0.034884	0.244186	0.523256	0.732558	1	0.023256	0.162791	0.395349	0.651163	0.988372	0.011628	0.313953	0.534884	0.755814	0.965116	0.348837	0.244186	0.406977	0.094118	0.047059	0	0.011628	0.244186	0.418605	0.906977	1	0.046512	0.337209	0.44186	0.5	0.604651	0.081395	0.162791	0.686047	0.790698	0.895349	0.430233	0.423529	0.046512	0.290698	0.453488	0.686047	0.965116	0.337209
0.392381	0.361905	0.245714	0.257634	0.179389	0.177481	0.005714	0.238095	0.451429	0.729524	1	0.00381	0.31619	0.506667	0.75619	0.994286	0.001905	0.167619	0.539048	0.752381	0.998095	0.700952	0.049524	0.249524	0.032443	0.051527	0.001908	0.001905	0.375238	0.579048	0.801905	1	0.344762	0.36	0.647619	0.857143	0.965714	0.005714	0.07619	0.150476	0.228571	0.96	0.348571	0.412214	0.011429	0.173333	0.499048	0.75619	0.980952	0.4
0.330144	0.330144	0.339713	0.232614	0.247002	0.230216	0.014354	0.244019	0.483254	0.739234	0.997608	0.004785	0.241627	0.511962	0.755981	1	0.002392	0.258373	0.504785	0.712919	0.992823	0.394737	0.148325	0.456938	0.06235	0.091127	0.004796	0.002392	0.222488	0.538278	0.80622	1	0.08134	0.282297	0.516746	0.906699	0.961722	0.009569	0.244019	0.421053	0.669856	0.866029	0.569378	0.364508	0.009569	0.239234	0.452153	0.698565	0.992823	0.349282
0.455882	0.25	0.294118	0.298507	0.238806	0.149254	0.029412	0.176471	0.455882	0.720588	0.985294	0.117647	0.235294	0.441176	0.602941	0.911765	0.014706	0.308824	0.485294	0.838235	1	0.558824	0.029412	0.411765	0.029851	0.059701	0	0.014706	0.132353	0.411765	0.573529	1	0.470588	0.470588	0.470588	0.470588	0.485294	0.279412	0.367647	0.676471	0.779412	0.882353	0.367647	0.447761	0.073529	0.323529	0.544118	0.764706	0.926471	0.264706
0.415929	0.19469	0.389381	0.116071	0.303571	0.169643	0.026549	0.185841	0.442478	0.752212	1	0.017699	0.221239	0.477876	0.654867	0.814159	0.00885	0.265487	0.566372	0.778761	0.955752	0.371681	0.221239	0.40708	0.107143	0.053571	0	0.00885	0.19469	0.353982	0.752212	1	0.035398	0.247788	0.362832	0.707965	0.831858	0.097345	0.442478	0.548673	0.876106	0.982301	0.469027	0.428571	0.035398	0.274336	0.477876	0.725664	0.955752	0.221239
0.356077	0.353945	0.289979	0.267094	0.215812	0.179487	0.004264	0.204691	0.420043	0.731343	0.995736	0.027719	0.232409	0.486141	0.727079	1	0.002132	0.339019	0.5629	0.784648	0.989339	0.484009	0.025586	0.490405	0.017094	0.08547	0	0.002132	0.183369	0.309168	0.682303	1	0.014925	0.01919	0.191898	0.968017	0.974414	0.059701	0.424307	0.575693	0.771855	0.948827	0.458422	0.435897	0.014925	0.34968	0.550107	0.765458	0.989339	0.405117
0.335938	0.390625	0.273438	0.267717	0.15748	0.244094	0.023438	0.210938	0.398438	0.71875	0.992188	0.015625	0.21875	0.539062	0.773438	1	0.007812	0.28125	0.554688	0.734375	0.960938	0.242188	0.046875	0.710938	0.015748	0.07874	0	0.007812	0.054688	0.5625	0.703125	1	0.945312	0.945312	0.960938	0.96875	0.984375	0.0625	0.28125	0.460938	0.71875	0.914062	0.445312	0.456693	0.03125	0.328125	0.523438	0.742188	0.96875	0.375
0.390572	0.446128	0.1633	0.269815	0.136594	0.141653	0.008418	0.265993	0.537037	0.821549	1	0.003367	0.250842	0.513468	0.708754	0.998316	0.001684	0.215488	0.363636	0.572391	0.838384	0.698653	0.080808	0.220539	0.047218	0.077572	0	0.001684	0.249158	0.510101	0.717172	1	0.055556	0.217172	0.388889	0.538721	0.686869	0.008418	0.265993	0.5	0.845118	0.905724	0.294613	0.306914	0.010101	0.205387	0.355219	0.60101	0.867003	0.469697
0.316456	0.386076	0.297468	0.196825	0.231746	0.222222	0.009494	0.170886	0.490506	0.772152	1	0.03481	0.287975	0.550633	0.731013	0.993671	0.003165	0.221519	0.455696	0.667722	0.996835	0.392405	0.155063	0.452532	0.044444	0.088889	0	0.003165	0.170886	0.43038	0.686709	1	0.174051	0.329114	0.414557	0.598101	0.68038	0.037975	0.272152	0.522152	0.835443	0.993671	0.541139	0.412698	0.015823	0.253165	0.493671	0.702532	0.996835	0.427215
0.367965	0.324675	0.307359	0.208696	0.265217	0.217391	0.012987	0.272727	0.502165	0.718615	1	0.008658	0.212121	0.484848	0.757576	0.987013	0.004329	0.225108	0.489177	0.748918	0.995671	0.376623	0.233766	0.38961	0.086957	0.052174	0	0.004329	0.225108	0.489177	0.831169	1	0.04329	0.251082	0.497835	0.731602	0.965368	0.116883	0.207792	0.467532	0.649351	0.874459	0.532468	0.452174	0.021645	0.229437	0.515152	0.748918	0.969697	0.320346
0.438326	0.356828	0.204846	0.324503	0.183223	0.134658	0.006608	0.185022	0.453744	0.720264	0.997797	0.004405	0.251101	0.45815	0.737885	0.993392	0.002203	0.414097	0.610132	0.810573	1	0.464758	0.218062	0.317181	0.081678	0.081678	0.002208	0.002203	0.207048	0.440529	0.740088	1	0.048458	0.286344	0.513216	0.73348	0.991189	0.008811	0.253304	0.537445	0.757709	0.993392	0.433921	0.322296	0.008811	0.244493	0.484581	0.73348	0.993392	0.400881
0.331226	0.384324	0.28445	0.264557	0.212658	0.218987	0.003793	0.235145	0.505689	0.764855	1	0.002528	0.216182	0.48799	0.740834	0.994943	0.001264	0.298357	0.506953	0.735777	0.997472	0.381795	0.109987	0.508217	0.035443	0.108861	0.002532	0.001264	0.283186	0.572693	0.816688	1	0.255373	0.453856	0.556258	0.879899	0.93426	0.020228	0.193426	0.402023	0.661188	0.997472	0.472819	0.417722	0.013906	0.288243	0.504425	0.709229	0.997472	0.4311
0.37234	0.297872	0.329787	0.215054	0.247312	0.193548	0.021277	0.212766	0.478723	0.755319	1	0.042553	0.329787	0.468085	0.670213	0.93617	0.010638	0.159574	0.510638	0.797872	0.968085	0.329787	0.297872	0.37234	0.107527	0.064516	0.021505	0.010638	0.148936	0.468085	0.606383	1	0.042553	0.106383	0.521277	0.659574	0.968085	0.170213	0.244681	0.340426	0.808511	0.93617	0.489362	0.430108	0.042553	0.234043	0.521277	0.712766	0.968085	0.276596
0.382775	0.338517	0.278708	0.249102	0.215569	0.196407	0.007177	0.318182	0.549043	0.758373	0.995215	0.002392	0.194976	0.458134	0.740431	0.997608	0.001196	0.217703	0.482057	0.732057	1	0.618421	0.145933	0.235646	0.064671	0.088623	0	0.001196	0.282297	0.522727	0.759569	1	0.002392	0.216507	0.393541	0.61244	0.998804	0.019139	0.253589	0.498804	0.726077	0.982057	0.450957	0.419162	0.002392	0.202153	0.42823	0.696172	0.996411	0.366029
0.281022	0.408759	0.310219	0.227771	0.202192	0.274056	0.002433	0.243309	0.489051	0.73236	1	0.004866	0.248175	0.515815	0.759124	0.995134	0.001217	0.244526	0.486618	0.738443	0.997567	0.458637	0.238443	0.30292	0.097442	0.053593	0.002436	0.001217	0.199513	0.469586	0.742092	1	0.037713	0.253041	0.409976	0.801703	0.997567	0.006083	0.312652	0.555961	0.710462	0.992701	0.564477	0.375152	0.00365	0.26764	0.491484	0.733577	0.997567	0.447689
0.41875	0.34375	0.2375	0.238994	0.220126	0.138365	0.05	0.25625	0.4875	0.75625	1	0.0125	0.225	0.63125	0.85625	0.98125	0.00625	0.15625	0.39375	0.56875	0.7625	0.69375	0.0875	0.21875	0.081761	0.069182	0.006289	0.00625	0.24375	0.50625	0.825	1	0.15	0.1625	0.43125	0.55625	0.625	0.10625	0.19375	0.3875	0.7	0.75625	0.3375	0.339623	0.025	0.18125	0.4125	0.58125	0.90625	0.34375
0.331126	0.331126	0.337748	0.246667	0.22	0.213333	0.013245	0.231788	0.443709	0.695364	0.993377	0.05298	0.225166	0.456954	0.688742	1	0.006623	0.245033	0.543046	0.794702	0.97351	0.370861	0.298013	0.331126	0.126667	0.046667	0.006667	0.006623	0.145695	0.562914	0.774834	1	0.013245	0.238411	0.596026	0.860927	0.960265	0.165563	0.317881	0.403974	0.483444	0.807947	0.384106	0.466667	0.019868	0.198675	0.523179	0.721854	0.953642	0.377483
0.322292	0.388541	0.289167	0.248208	0.194444	0.236559	0.002686	0.231871	0.451209	0.724261	0.993733	0.001791	0.234557	0.495971	0.733214	1	0.000895	0.29991	0.558639	0.784244	0.999105	0.57744	0.145031	0.277529	0.083333	0.068996	0.002688	0.000895	0.233662	0.519248	0.734109	1	0.025962	0.594449	0.711728	0.840645	0.999105	0.007162	0.185318	0.406446	0.574754	0.991047	0.489705	0.387097	0.007162	0.313339	0.576544	0.772605	0.997314	0.402865
0.285955	0.465938	0.248108	0.237374	0.143098	0.207071	0.006728	0.222876	0.472666	0.79058	0.997477	0.001682	0.269975	0.485282	0.658537	0.998318	0.000841	0.262405	0.58032	0.813288	1	0.58873	0.052145	0.359125	0.030303	0.087542	0.005051	0.000841	0.213625	0.42725	0.6291	1	0.005887	0.158957	0.315391	0.476871	0.936081	0.002523	0.400336	0.742641	0.86291	0.981497	0.568545	0.316498	0.002523	0.283431	0.522288	0.728343	0.995795	0.46005
0.51255	0.298547	0.188904	0.30291	0.186508	0.112434	0.005284	0.303831	0.593131	0.804491	0.998679	0.002642	0.180978	0.47424	0.656539	0.990753	0.001321	0.22325	0.380449	0.61823	1	0.677675	0.070013	0.252312	0.026455	0.092593	0	0.001321	0.27609	0.590489	0.792602	1	0.178336	0.228534	0.284016	0.406869	0.459709	0.014531	0.203435	0.391017	0.622193	0.959049	0.245707	0.240741	0.015852	0.198151	0.361955	0.528402	0.984148	0.406869
0.29918	0.393443	0.307377	0.255144	0.160494	0.263374	0.028689	0.204918	0.512295	0.77459	1	0.008197	0.282787	0.528689	0.766393	0.987705	0.004098	0.229508	0.430328	0.639344	0.995902	0.368852	0.102459	0.528689	0.032922	0.074074	0	0.004098	0.168033	0.454918	0.778689	1	0.418033	0.75	0.77459	0.827869	0.864754	0.032787	0.237705	0.483607	0.622951	0.959016	0.483607	0.353909	0.012295	0.237705	0.487705	0.672131	0.995902	0.393443
0.336449	0.351135	0.312417	0.217914	0.219251	0.223262	0.004005	0.312417	0.542056	0.815754	1	0.008011	0.202937	0.479306	0.70761	0.99733	0.001335	0.222964	0.46996	0.699599	0.998665	0.403204	0.261682	0.335113	0.076203	0.057487	0.009358	0.001335	0.221629	0.516689	0.781041	1	0.006676	0.158879	0.508678	0.783712	0.923899	0.029372	0.296395	0.405874	0.716956	0.99733	0.574099	0.36631	0.012016	0.208278	0.479306	0.676903	0.998665	0.376502
0.379791	0.324913	0.295296	0.236269	0.204882	0.186574	0.002613	0.189895	0.455575	0.749129	0.999129	0.001742	0.256969	0.506969	0.71777	1	0.000871	0.301394	0.539199	0.786585	0.994774	0.389373	0.12108	0.489547	0.040105	0.083697	0.001744	0.000871	0.267422	0.517422	0.766551	1	0.221254	0.341463	0.528746	0.813589	0.993902	0.010453	0.195993	0.459059	0.74216	0.981707	0.481707	0.322581	0.013066	0.319686	0.544425	0.762195	0.994774	0.355401
0.359649	0.302632	0.337719	0.237885	0.268722	0.193833	0.026316	0.223684	0.442982	0.688596	1	0.017544	0.302632	0.600877	0.798246	0.986842	0.004386	0.210526	0.447368	0.714912	0.995614	0.355263	0.20614	0.438596	0.070485	0.061674	0	0.004386	0.311404	0.627193	0.885965	1	0.013158	0.263158	0.438596	0.846491	0.973684	0.030702	0.144737	0.482456	0.596491	0.820175	0.517544	0.475771	0.008772	0.27193	0.52193	0.745614	0.969298	0.298246
0.333797	0.358832	0.307371	0.236769	0.192201	0.218663	0.004172	0.194715	0.458971	0.732962	0.997218	0.006954	0.260083	0.521558	0.755216	1	0.001391	0.2879	0.50904	0.752434	0.993046	0.381085	0.155772	0.463143	0.054318	0.090529	0.001393	0.001391	0.235049	0.499305	0.713491	1	0.004172	0.299026	0.478442	0.564673	0.958275	0.022253	0.21975	0.495132	0.781641	0.993046	0.561892	0.342618	0.005563	0.301808	0.522949	0.751043	0.993046	0.371349
0.25784	0.407666	0.334495	0.164336	0.188811	0.269231	0.006969	0.170732	0.508711	0.773519	1	0.010453	0.229965	0.463415	0.707317	0.993031	0.003484	0.278746	0.505226	0.763066	0.982578	0.425087	0.243902	0.33101	0.097902	0.076923	0	0.003484	0.156794	0.341463	0.567944	1	0.020906	0.191638	0.313589	0.466899	0.95122	0.348432	0.672474	0.783972	0.87108	0.982578	0.54007	0.398601	0.017422	0.28223	0.494774	0.752613	0.982578	0.390244
0.466019	0.262136	0.271845	0.284314	0.22549	0.137255	0.029126	0.31068	0.582524	0.786408	0.990291	0.019417	0.184466	0.339806	0.572816	1	0.009709	0.174757	0.495146	0.76699	0.941748	0.61165	0.097087	0.291262	0.098039	0.098039	0	0.009709	0.145631	0.359223	0.650485	1	0.15534	0.165049	0.582524	0.601942	0.76699	0.184466	0.466019	0.669903	0.883495	0.970874	0.378641	0.411765	0.087379	0.203883	0.504854	0.747573	0.970874	0.300971
0.324324	0.416462	0.259214	0.276753	0.153752	0.211562	0.003686	0.214988	0.476658	0.79484	0.997543	0.002457	0.234644	0.525799	0.740786	1	0.001229	0.302211	0.471744	0.712531	0.998771	0.492629	0.12285	0.384521	0.04797	0.092251	0.00369	0.001229	0.137592	0.41769	0.67199	1	0.009828	0.321867	0.471744	0.594595	0.716216	0.040541	0.361179	0.641278	0.821867	0.995086	0.44226	0.305043	0.0086	0.289926	0.488943	0.701474	0.996314	0.444717
0.314425	0.463533	0.222042	0.26461	0.157468	0.194805	0.006483	0.222042	0.505673	0.748784	0.996759	0.003241	0.269044	0.47812	0.724473	1	0.001621	0.241491	0.547812	0.777958	0.998379	0.654781	0.029173	0.316045	0.025974	0.061688	0	0.001621	0.314425	0.518639	0.750405	1	0.009724	0.320908	0.52188	0.696921	0.820097	0.06483	0.19611	0.354943	0.893031	0.990276	0.486224	0.373377	0.009724	0.291734	0.606159	0.771475	0.983793	0.494327
0.358156	0.539007	0.102837	0.469751	0.085409	0.096085	0.01773	0.248227	0.446809	0.716312	0.989362	0.007092	0.35461	0.585106	0.765957	1	0.003546	0.06383	0.159574	0.301418	0.992908	0.826241	0.088652	0.085106	0.02847	0.021352	0	0.003546	0.365248	0.570922	0.776596	1	0.049645	0.141844	0.163121	0.216312	0.315603	0.095745	0.113475	0.234043	0.255319	0.921986	0.312057	0.320285	0.010638	0.141844	0.29078	0.514184	0.932624	0.5
0.349112	0.352663	0.298225	0.218009	0.204976	0.218009	0.007101	0.23432	0.433136	0.71716	1	0.002367	0.228402	0.491124	0.759763	0.99645	0.001183	0.293491	0.553846	0.757396	0.997633	0.512426	0.102959	0.384615	0.0391	0.074645	0.003555	0.001183	0.247337	0.376331	0.624852	1	0.033136	0.576331	0.700592	0.785799	0.99645	0.00355	0.182249	0.586982	0.804734	0.984615	0.459172	0.381517	0.005917	0.336095	0.583432	0.782249	0.995266	0.391716
0.33617	0.344681	0.319149	0.226496	0.200855	0.213675	0.012766	0.229787	0.455319	0.680851	0.987234	0.021277	0.246809	0.570213	0.774468	1	0.004255	0.255319	0.489362	0.719149	0.995745	0.485106	0.361702	0.153191	0.136752	0.034188	0	0.004255	0.225532	0.578723	0.782979	1	0.093617	0.412766	0.570213	0.757447	0.970213	0.017021	0.157447	0.195745	0.242553	0.480851	0.544681	0.384615	0.017021	0.289362	0.523404	0.761702	0.995745	0.353191
0.401015	0.284264	0.314721	0.214286	0.25	0.173469	0.015228	0.253807	0.527919	0.761421	1	0.010152	0.208122	0.446701	0.715736	0.994924	0.005076	0.243655	0.502538	0.741117	0.984772	0.467005	0.187817	0.345178	0.066327	0.066327	0.02551	0.005076	0.152284	0.522843	0.766497	1	0.071066	0.274112	0.614213	0.939086	0.989848	0.040609	0.324873	0.426396	0.720812	0.918782	0.502538	0.408163	0.020305	0.329949	0.502538	0.746193	0.984772	0.279188
0.299363	0.464968	0.235669	0.288462	0.185897	0.217949	0.012739	0.133758	0.382166	0.636943	0.961783	0.050955	0.273885	0.528662	0.808917	1	0.006369	0.363057	0.55414	0.719745	0.942675	0.630573	0.165605	0.203822	0.051282	0.064103	0.012821	0.006369	0.165605	0.324841	0.579618	1	0.11465	0.503185	0.757962	0.796178	0.942675	0.019108	0.535032	0.636943	0.859873	0.980892	0.394904	0.397436	0.019108	0.261146	0.484076	0.713376	0.942675	0.471338
0.411765	0.235294	0.352941	0.223881	0.283582	0.104478	0.044118	0.294118	0.588235	0.808824	0.985294	0.029412	0.25	0.411765	0.705882	0.970588	0.014706	0.191176	0.441176	0.617647	1	0.485294	0.161765	0.352941	0.149254	0.059701	0	0.014706	0.147059	0.279412	0.661765	1	0.058824	0.088235	0.308824	0.426471	0.470588	0.514706	0.588235	0.735294	0.823529	0.911765	0.323529	0.447761	0.058824	0.205882	0.426471	0.602941	0.838235	0.338235
0.308219	0.424658	0.267123	0.237113	0.195876	0.237113	0.034247	0.321918	0.554795	0.797945	0.996575	0.006849	0.178082	0.496575	0.688356	0.986301	0.003425	0.205479	0.400685	0.743151	1	0.575342	0.208904	0.215753	0.085911	0.051546	0.003436	0.003425	0.19863	0.434932	0.702055	1	0.044521	0.39726	0.523973	0.815068	0.969178	0.020548	0.35274	0.5	0.763699	0.921233	0.39726	0.309278	0.017123	0.311644	0.496575	0.791096	0.972603	0.465753
0.302158	0.316547	0.381295	0.181159	0.217391	0.23913	0.014388	0.230216	0.402878	0.647482	1	0.064748	0.215827	0.52518	0.719424	0.971223	0.007194	0.273381	0.546763	0.776978	0.985612	0.338129	0.323741	0.338129	0.115942	0.057971	0	0.007194	0.244604	0.482014	0.669065	1	0.028777	0.100719	0.208633	0.553957	0.697842	0.309353	0.381295	0.755396	0.899281	0.985612	0.553957	0.434783	0.035971	0.273381	0.568345	0.726619	0.985612	0.280576
0.390977	0.315789	0.293233	0.265152	0.181818	0.219697	0.022556	0.24812	0.518797	0.75188	1	0.015038	0.210526	0.458647	0.721805	0.969925	0.007519	0.270677	0.473684	0.729323	0.924812	0.300752	0.360902	0.338346	0.045455	0.060606	0.015152	0.007519	0.105263	0.323308	0.609023	1	0.150376	0.654135	0.744361	0.849624	0.93985	0.06015	0.278195	0.390977	0.511278	0.631579	0.421053	0.439394	0.150376	0.308271	0.526316	0.736842	0.924812	0.323308
0.350427	0.509972	0.139601	0.382857	0.074286	0.151429	0.011396	0.222222	0.410256	0.68661	0.997151	0.005698	0.259259	0.549858	0.760684	1	0.002849	0.239316	0.501425	0.717949	0.985755	0.940171	0.048433	0.011396	0.025714	0.002857	0.002857	0.002849	0.264957	0.509972	0.74359	1	0.019943	0.02849	0.14245	0.418803	0.97151	0.974359	0.974359	0.977208	0.980057	0.982906	0.216524	0.268571	0.014245	0.324786	0.521368	0.789174	0.985755	0.441595
0.370474	0.337047	0.292479	0.215084	0.251397	0.164804	0.008357	0.253482	0.479109	0.70195	1	0.02507	0.320334	0.526462	0.777159	0.994429	0.002786	0.214485	0.51532	0.724234	0.997214	0.440111	0.197772	0.362117	0.125698	0.055866	0.011173	0.002786	0.37883	0.562674	0.802228	0.991643	0.008357	0.590529	0.715877	0.832869	1	0.011142	0.153203	0.245125	0.437326	0.902507	0.420613	0.402235	0.005571	0.197772	0.568245	0.746518	0.997214	0.376045
0.406545	0.306156	0.287299	0.241398	0.241398	0.169811	0.003328	0.239046	0.507488	0.731559	0.999445	0.001109	0.289517	0.50416	0.745979	1	0.000555	0.207432	0.473655	0.770383	0.997227	0.569606	0.160843	0.269551	0.064373	0.056604	0.00444	0.000555	0.287854	0.523572	0.678314	1	0.010538	0.260677	0.445369	0.77482	0.995563	0.006656	0.143649	0.418747	0.833611	0.991681	0.468109	0.358491	0.002773	0.281198	0.494176	0.806988	0.996672	0.324459
0.332858	0.494654	0.172488	0.271755	0.131241	0.14194	0.002851	0.27655	0.523877	0.776194	1	0.001426	0.203136	0.459016	0.72345	0.998574	0.000713	0.353528	0.592302	0.783321	0.993585	0.650748	0.045617	0.303635	0.027817	0.06776	0.000713	0.000713	0.238061	0.481112	0.709195	1	0.104063	0.37206	0.567356	0.724875	0.994298	0.013542	0.326443	0.580898	0.802566	0.986458	0.329294	0.323823	0.014968	0.295795	0.503207	0.754811	0.993585	0.491091
0.347032	0.360731	0.292237	0.256293	0.221968	0.183066	0.006849	0.271689	0.547945	0.773973	1	0.004566	0.212329	0.488584	0.730594	0.986301	0.002283	0.244292	0.479452	0.762557	0.995434	0.360731	0.136986	0.502283	0.077803	0.10984	0.004577	0.002283	0.212329	0.518265	0.785388	1	0.06621	0.299087	0.52968	0.920091	0.995434	0.020548	0.269406	0.481735	0.710046	0.947489	0.579909	0.389016	0.011416	0.244292	0.472603	0.700913	0.995434	0.401826
0.391153	0.355064	0.253783	0.235431	0.184149	0.194639	0.005821	0.314319	0.610012	0.798603	0.997672	0.002328	0.237485	0.477299	0.735739	1	0.001164	0.215367	0.400466	0.601863	0.996508	0.473807	0.124563	0.40163	0.050117	0.08042	0.003497	0.001164	0.231665	0.542491	0.759022	1	0.055879	0.243306	0.402794	0.599534	0.976717	0.036088	0.260768	0.522701	0.738068	0.996508	0.423749	0.344988	0.003492	0.215367	0.392317	0.573923	0.996508	0.391153
0.298544	0.390777	0.31068	0.231144	0.182482	0.226277	0.007282	0.18932	0.436893	0.723301	0.997573	0.004854	0.264563	0.495146	0.75	0.985437	0.002427	0.259709	0.51699	0.757282	1	0.402913	0.206311	0.390777	0.077859	0.068127	0	0.002427	0.194175	0.487864	0.779126	1	0.065534	0.230583	0.427184	0.558252	0.995146	0.101942	0.286408	0.601942	0.769417	0.98301	0.582524	0.413625	0.012136	0.31068	0.526699	0.752427	0.995146	0.415049
0.383721	0.302326	0.313953	0.235294	0.235294	0.211765	0.023256	0.255814	0.430233	0.709302	0.953488	0.034884	0.186047	0.569767	0.72093	0.976744	0.011628	0.197674	0.453488	0.755814	1	0.383721	0.290698	0.325581	0.094118	0.070588	0	0.011628	0.139535	0.55814	0.825581	1	0.081395	0.302326	0.604651	0.674419	0.813953	0.162791	0.232558	0.453488	0.534884	0.94186	0.406977	0.494118	0.046512	0.151163	0.395349	0.651163	0.965116	0.325581
0.323988	0.303219	0.372793	0.201663	0.22869	0.22973	0.002077	0.234683	0.460021	0.738318	0.998962	0.005192	0.277259	0.519211	0.754933	1	0.001038	0.246106	0.480789	0.748702	0.994808	0.253375	0.006231	0.740395	0.004158	0.095634	0.002079	0.001038	0.285566	0.509865	0.721703	1	0.008307	0.008307	0.627207	0.628245	0.846314	0.003115	0.239875	0.494289	0.752856	0.996885	0.569055	0.380457	0.005192	0.258567	0.522326	0.760125	0.997923	0.327103
0.452381	0.25	0.297619	0.277108	0.240964	0.13253	0.071429	0.309524	0.595238	0.761905	1	0.059524	0.321429	0.511905	0.72619	0.964286	0.011905	0.154762	0.27381	0.5	0.892857	0.380952	0.309524	0.309524	0.120482	0.072289	0	0.011905	0.309524	0.47619	0.904762	1	0.02381	0.083333	0.238095	0.345238	0.5	0.52381	0.583333	0.666667	0.809524	0.892857	0.369048	0.433735	0.02381	0.166667	0.392857	0.559524	0.892857	0.321429
0.454545	0.215909	0.329545	0.218391	0.252874	0.172414	0.034091	0.215909	0.465909	0.693182	1	0.022727	0.079545	0.431818	0.738636	0.954545	0.011364	0.318182	0.545455	0.75	0.988636	0.147727	0.022727	0.829545	0.022989	0.068966	0	0.011364	0.034091	0.477273	0.738636	1	0.761364	0.761364	0.761364	0.761364	0.772727	0.056818	0.25	0.454545	0.693182	0.988636	0.318182	0.436782	0.079545	0.352273	0.579545	0.738636	0.977273	0.238636
0.347611	0.495881	0.156507	0.242574	0.120462	0.135314	0.00659	0.202636	0.410214	0.607908	0.985173	0.003295	0.30972	0.637562	0.850082	1	0.001647	0.210873	0.431631	0.574959	0.98682	0.759473	0.052718	0.187809	0.019802	0.033003	0.0033	0.001647	0.228995	0.578254	0.790774	1	0.092257	0.327842	0.385502	0.436573	0.571664	0.128501	0.265239	0.410214	0.502471	0.953871	0.441516	0.356436	0.004942	0.30313	0.54201	0.790774	0.98682	0.518946
0.358242	0.432967	0.208791	0.248899	0.167401	0.143172	0.006593	0.224176	0.437363	0.672527	1	0.004396	0.27033	0.586813	0.815385	0.997802	0.002198	0.276923	0.483516	0.643956	0.995604	0.657143	0.063736	0.279121	0.030837	0.044053	0.004405	0.002198	0.210989	0.586813	0.784615	1	0.068132	0.32967	0.364835	0.417582	0.643956	0.101099	0.259341	0.501099	0.718681	0.947253	0.4	0.352423	0.017582	0.274725	0.483516	0.694505	0.971429	0.452747
0.388102	0.380548	0.23135	0.258034	0.175803	0.180529	0.003777	0.189802	0.527856	0.76865	1	0.007554	0.282342	0.450425	0.699717	0.997167	0.000944	0.309726	0.538244	0.759207	0.998111	0.654391	0.081209	0.2644	0.038752	0.067108	0.004726	0.000944	0.255902	0.444759	0.685552	1	0.082153	0.422096	0.580737	0.858357	0.964117	0.005666	0.128423	0.647781	0.786591	0.990557	0.341832	0.347826	0.002833	0.325779	0.552408	0.783758	0.983003	0.413598
0.317422	0.348449	0.334129	0.198565	0.236842	0.205742	0.011933	0.195704	0.47494	0.754177	0.988067	0.004773	0.288783	0.5179	0.71599	1	0.002387	0.23389	0.472554	0.74463	0.997613	0.417661	0.217184	0.365155	0.078947	0.064593	0.002392	0.002387	0.300716	0.53222	0.799523	1	0.114558	0.281623	0.539379	0.789976	0.983294	0.009547	0.195704	0.396181	0.625298	0.940334	0.560859	0.392344	0.009547	0.28401	0.4821	0.725537	0.990453	0.338902
0.330425	0.385108	0.284468	0.237485	0.189173	0.223516	0.002909	0.237347	0.474113	0.725422	1	0.001163	0.280396	0.562536	0.803956	0.999418	0.000582	0.209424	0.452007	0.680628	0.997091	0.547411	0.162885	0.289703	0.068102	0.065774	0.00291	0.000582	0.311809	0.592787	0.826062	1	0.010471	0.379872	0.475276	0.651542	0.995346	0.001745	0.166376	0.300756	0.600349	0.990692	0.485166	0.369034	0.001745	0.197208	0.436882	0.665503	0.997091	0.37929
0.365915	0.330827	0.303258	0.240903	0.237139	0.195734	0.005013	0.255639	0.491228	0.75188	1	0.002506	0.230576	0.525063	0.738095	0.996241	0.001253	0.250627	0.47619	0.761905	0.998747	0.5401	0.359649	0.100251	0.121706	0.033877	0.003764	0.001253	0.24812	0.507519	0.760652	1	0.048872	0.266917	0.493734	0.735589	0.969925	0.008772	0.076441	0.441103	0.849624	0.993734	0.473684	0.398996	0.003759	0.236842	0.487469	0.736842	0.994987	0.373434
0.318623	0.43248	0.248897	0.242049	0.174912	0.218198	0.00353	0.247132	0.507502	0.76346	0.992056	0.001765	0.313327	0.541041	0.759047	1	0.000883	0.181818	0.399823	0.699029	0.994704	0.640777	0.059135	0.300088	0.036219	0.060954	0.00265	0.000883	0.40865	0.578994	0.768756	1	0.007944	0.227714	0.739629	0.793469	0.954987	0.031774	0.157988	0.269197	0.390997	0.969991	0.424537	0.392226	0.002648	0.217123	0.445719	0.721977	0.978817	0.43248
0.386364	0.378788	0.234848	0.267176	0.160305	0.152672	0.037879	0.30303	0.560606	0.780303	0.992424	0.045455	0.25	0.537879	0.787879	1	0.007576	0.098485	0.310606	0.530303	0.833333	0.469697	0.19697	0.333333	0.061069	0.045802	0.015267	0.007576	0.295455	0.469697	0.878788	1	0.015152	0.212121	0.424242	0.5	0.818182	0.05303	0.128788	0.590909	0.674242	0.80303	0.310606	0.274809	0.022727	0.181818	0.416667	0.590909	0.863636	0.378788
0.337004	0.328194	0.334802	0.205298	0.249448	0.161148	0.004405	0.222467	0.484581	0.753304	0.995595	0.011013	0.242291	0.486784	0.735683	0.977974	0.002203	0.277533	0.513216	0.757709	1	0.400881	0.185022	0.414097	0.066225	0.083885	0.004415	0.002203	0.26652	0.497797	0.746696	1	0.11674	0.273128	0.647577	0.770925	0.955947	0.017621	0.209251	0.451542	0.702643	0.997797	0.544053	0.401766	0.015419	0.277533	0.480176	0.711454	0.991189	0.348018
0.36014	0.265734	0.374126	0.196491	0.259649	0.192982	0.006993	0.251748	0.48951	0.77972	0.993007	0.041958	0.248252	0.51049	0.716783	1	0.003497	0.237762	0.486014	0.751748	0.996503	0.405594	0.171329	0.423077	0.049123	0.077193	0	0.003497	0.178322	0.440559	0.695804	1	0.185315	0.34965	0.43007	0.632867	0.723776	0.034965	0.244755	0.527972	0.828671	0.986014	0.555944	0.414035	0.024476	0.244755	0.468531	0.674825	0.982517	0.265734
0.36646	0.291925	0.341615	0.199067	0.239502	0.244168	0.003106	0.248447	0.51087	0.729814	0.995342	0.004658	0.26087	0.490683	0.751553	1	0.001553	0.237578	0.495342	0.776398	0.998447	0.416149	0.231366	0.352484	0.088647	0.060653	0.007776	0.001553	0.23913	0.431677	0.703416	1	0.051242	0.190994	0.420807	0.902174	0.987578	0.003106	0.321429	0.621118	0.756211	0.993789	0.552795	0.382582	0.006211	0.273292	0.495342	0.753106	0.998447	0.296584
0.33494	0.351807	0.313253	0.253623	0.229469	0.236715	0.004819	0.19759	0.518072	0.737349	0.987952	0.007229	0.284337	0.551807	0.775904	1	0.00241	0.236145	0.443373	0.681928	0.995181	0.566265	0.154217	0.279518	0.060386	0.060386	0.002415	0.00241	0.289157	0.554217	0.742169	1	0.151807	0.33253	0.443373	0.546988	0.850602	0.028916	0.142169	0.4	0.790361	0.927711	0.438554	0.362319	0.031325	0.236145	0.428916	0.650602	0.963855	0.387952
0.307246	0.408696	0.284058	0.211901	0.187228	0.226415	0.004348	0.292754	0.549275	0.755072	1	0.005797	0.168116	0.437681	0.743478	0.989855	0.001449	0.317391	0.53913	0.744928	0.992754	0.576812	0.14058	0.282609	0.05225	0.087083	0.002903	0.001449	0.215942	0.469565	0.798551	1	0.015942	0.486957	0.637681	0.715942	0.975362	0.062319	0.226087	0.410145	0.676812	0.965217	0.472464	0.444122	0.005797	0.27971	0.553623	0.747826	0.986957	0.417391
0.283228	0.476266	0.240506	0.242472	0.156894	0.206022	0.011076	0.193038	0.495253	0.727848	0.992089	0.003165	0.330696	0.525316	0.762658	1	0.001582	0.227848	0.447785	0.71519	0.988924	0.738924	0.053797	0.207278	0.034865	0.031696	0	0.001582	0.343354	0.528481	0.757911	1	0.026899	0.06962	0.099684	0.175633	0.563291	0.045886	0.231013	0.292722	0.935127	0.992089	0.664557	0.278922	0.025316	0.335443	0.599684	0.775316	0.988924	0.493671
0.325905	0.384401	0.289694	0.23743	0.195531	0.203911	0.008357	0.21727	0.473538	0.763231	1	0.005571	0.231198	0.509749	0.724234	0.997214	0.002786	0.270195	0.493036	0.75766	0.986072	0.467967	0.239554	0.292479	0.086592	0.053073	0.00838	0.002786	0.181058	0.412256	0.632312	1	0.008357	0.228412	0.325905	0.506964	0.649025	0.094708	0.682451	0.810585	0.899721	0.986072	0.543175	0.324022	0.011142	0.24234	0.481894	0.690808	0.986072	0.395543
0.29904	0.460905	0.240055	0.233516	0.144231	0.206044	0.004115	0.201646	0.530864	0.759945	1	0.002743	0.231824	0.41701	0.689986	0.994513	0.001372	0.29904	0.603567	0.805213	0.998628	0.714678	0.106996	0.178326	0.049451	0.052198	0.002747	0.001372	0.224966	0.441701	0.659808	1	0.009602	0.283951	0.709191	0.840878	0.997257	0.082305	0.364883	0.670782	0.875171	0.972565	0.499314	0.326923	0.005487	0.286694	0.518519	0.716049	0.995885	0.45679
0.445378	0.218487	0.336134	0.118644	0.322034	0.169492	0.016807	0.210084	0.521008	0.705882	0.991597	0.07563	0.235294	0.571429	0.848739	0.941176	0.008403	0.243697	0.436975	0.630252	1	0.470588	0.042017	0.487395	0.008475	0.127119	0.008475	0.008403	0.134454	0.722689	0.848739	1	0.151261	0.151261	0.159664	0.168067	0.184874	0.02521	0.319328	0.504202	0.621849	0.983193	0.403361	0.389831	0.033613	0.201681	0.411765	0.714286	0.966387	0.201681
0.366935	0.322581	0.310484	0.271255	0.218623	0.190283	0.008065	0.221774	0.491935	0.741935	1	0.032258	0.254032	0.532258	0.822581	0.987903	0.004032	0.245968	0.439516	0.657258	0.991935	0.330645	0.084677	0.584677	0.032389	0.11336	0	0.004032	0.169355	0.447581	0.778226	1	0.439516	0.766129	0.826613	0.846774	0.879032	0.040323	0.258065	0.459677	0.620968	0.983871	0.495968	0.364372	0.016129	0.245968	0.447581	0.685484	0.987903	0.278226
0.416	0.3072	0.2768	0.25641	0.221154	0.189103	0.0048	0.2	0.4304	0.6704	0.9984	0.0032	0.2768	0.6032	0.8192	0.9968	0.0016	0.3152	0.5264	0.7376	1	0.5104	0.1616	0.328	0.070513	0.048077	0	0.0016	0.1936	0.4048	0.7904	1	0.0912	0.2816	0.7872	0.8784	0.992	0.0144	0.3472	0.4976	0.5792	0.7088	0.4192	0.394231	0.0096	0.3424	0.5968	0.8096	0.9968	0.3648
0.338422	0.343511	0.318066	0.221939	0.232143	0.206633	0.010178	0.251908	0.491094	0.773537	0.997455	0.005089	0.24173	0.529262	0.75827	0.989822	0.002545	0.234097	0.463104	0.689567	1	0.348601	0.129771	0.521628	0.048469	0.084184	0.007653	0.002545	0.262087	0.552163	0.816794	1	0.017812	0.229008	0.287532	0.671756	0.928753	0.02799	0.312977	0.486005	0.717557	0.969466	0.56743	0.372449	0.007634	0.29771	0.562341	0.740458	0.97201	0.37659
0.316838	0.328522	0.354639	0.198074	0.229711	0.243466	0.004124	0.28866	0.514089	0.752577	0.996564	0.002062	0.241924	0.498282	0.743643	0.998625	0.000687	0.235739	0.487285	0.749828	1	0.54433	0.360137	0.095533	0.114168	0.037139	0.008253	0.000687	0.261856	0.498282	0.717526	1	0.002062	0.201375	0.457045	0.754639	0.936082	0.04055	0.335395	0.626117	0.958076	0.998625	0.591753	0.316369	0.001375	0.243299	0.490722	0.753952	0.997938	0.34433
0.389432	0.27593	0.334638	0.186275	0.256863	0.201961	0.003914	0.217221	0.516634	0.755382	0.996086	0.007828	0.240705	0.471624	0.708415	0.998043	0.001957	0.262231	0.48728	0.761252	1	0.365949	0.162427	0.471624	0.07451	0.082353	0.015686	0.001957	0.277886	0.530333	0.735812	1	0.005871	0.409002	0.604697	0.776908	0.984344	0.011742	0.205479	0.393346	0.74364	0.996086	0.455969	0.407843	0.005871	0.268102	0.46184	0.726027	0.992172	0.266145
0.384333	0.328029	0.287638	0.275735	0.207108	0.208333	0.004896	0.26683	0.531212	0.780906	0.998776	0.002448	0.253366	0.495716	0.74541	1	0.001224	0.215422	0.451652	0.682987	0.986536	0.485924	0.21175	0.302326	0.077206	0.055147	0.003676	0.001224	0.244798	0.517748	0.831089	1	0.063647	0.179927	0.392901	0.784578	0.877601	0.003672	0.312118	0.559364	0.70257	0.964504	0.485924	0.333333	0.003672	0.255814	0.455324	0.679315	0.986536	0.334149
0.3125	0.34375	0.34375	0.231579	0.210526	0.263158	0.0625	0.291667	0.520833	0.770833	0.958333	0.020833	0.1875	0.489583	0.739583	1	0.010417	0.239583	0.46875	0.645833	0.979167	0.489583	0.385417	0.125	0.115789	0.052632	0.010526	0.010417	0.40625	0.75	0.875	1	0.125	0.25	0.447917	0.614583	0.739583	0.03125	0.052083	0.083333	0.333333	0.364583	0.541667	0.336842	0.052083	0.270833	0.416667	0.65625	0.979167	0.375
0.407407	0.414141	0.178451	0.300676	0.148649	0.158784	0.006734	0.265993	0.555556	0.750842	1	0.010101	0.222222	0.521886	0.777778	0.986532	0.003367	0.191919	0.40404	0.535354	0.979798	0.690236	0.154882	0.154882	0.067568	0.047297	0	0.003367	0.26936	0.646465	0.818182	1	0.094276	0.272727	0.434343	0.491582	0.639731	0.03367	0.208754	0.383838	0.511785	0.905724	0.319865	0.324324	0.013468	0.222222	0.464646	0.649832	0.956229	0.417508
0.360294	0.25	0.389706	0.177778	0.251852	0.162963	0.036765	0.25	0.477941	0.735294	0.985294	0.051471	0.330882	0.514706	0.625	0.977941	0.007353	0.205882	0.404412	0.786765	1	0.595588	0.397059	0.007353	0.140741	0.007407	0.007407	0.007353	0.367647	0.544118	0.691176	1	0.014706	0.161765	0.316176	0.794118	0.992647	0.397059	0.397059	0.397059	0.397059	0.397059	0.536765	0.340741	0.014706	0.323529	0.558824	0.772059	0.977941	0.227941
0.366133	0.313501	0.320366	0.227064	0.263761	0.188073	0.006865	0.240275	0.498856	0.759725	0.990847	0.009153	0.228833	0.487414	0.734554	1	0.002288	0.267735	0.496568	0.73913	0.995423	0.402746	0.189931	0.407323	0.073394	0.082569	0.004587	0.002288	0.295195	0.517162	0.773455	1	0.100686	0.249428	0.489703	0.743707	0.935927	0.009153	0.196796	0.439359	0.681922	0.981693	0.544622	0.417431	0.009153	0.265446	0.487414	0.702517	0.995423	0.340961
0.321244	0.378238	0.300518	0.239583	0.255208	0.229167	0.015544	0.238342	0.476684	0.725389	1	0.010363	0.207254	0.497409	0.740933	0.979275	0.005181	0.279793	0.528497	0.73057	0.989637	0.419689	0.466321	0.11399	0.140625	0.026042	0.005208	0.005181	0.300518	0.590674	0.834197	1	0.015544	0.326425	0.523316	0.694301	0.979275	0.07772	0.098446	0.238342	0.264249	0.725389	0.46114	0.489583	0.015544	0.264249	0.476684	0.704663	0.974093	0.419689
0.306931	0.39604	0.29703	0.21	0.22	0.29	0.069307	0.306931	0.49505	0.861386	1	0.019802	0.158416	0.415842	0.693069	0.980198	0.009901	0.267327	0.514851	0.653465	0.990099	0.405941	0.178218	0.415842	0.06	0.04	0	0.009901	0.128713	0.405941	0.623762	1	0.069307	0.475248	0.524752	0.564356	0.663366	0.178218	0.267327	0.772277	0.871287	0.980198	0.445545	0.5	0.029703	0.237624	0.524752	0.693069	0.950495	0.39604
0.417062	0.331754	0.251185	0.333333	0.166667	0.171429	0.014218	0.28436	0.601896	0.819905	1	0.009479	0.165877	0.417062	0.672986	0.990521	0.004739	0.255924	0.488152	0.649289	0.981043	0.488152	0.218009	0.293839	0.061905	0.071429	0.014286	0.004739	0.14218	0.421801	0.819905	1	0.123223	0.222749	0.364929	0.601896	0.672986	0.075829	0.488152	0.71564	0.78673	0.971564	0.374408	0.314286	0.042654	0.255924	0.407583	0.606635	0.981043	0.298578
0.289931	0.465278	0.244792	0.21913	0.154783	0.24	0.005208	0.239583	0.522569	0.690972	1	0.003472	0.237847	0.475694	0.776042	0.996528	0.001736	0.286458	0.503472	0.722222	0.994792	0.642361	0.090278	0.267361	0.046957	0.085217	0.001739	0.001736	0.220486	0.510417	0.805556	1	0.128472	0.407986	0.479167	0.654514	0.723958	0.026042	0.256944	0.505208	0.670139	0.96875	0.449653	0.389565	0.017361	0.256944	0.529514	0.774306	0.994792	0.472222
0.333333	0.336391	0.330275	0.230061	0.254601	0.184049	0.009174	0.266055	0.522936	0.755352	0.981651	0.006116	0.201835	0.449541	0.743119	1	0.003058	0.281346	0.504587	0.715596	0.996942	0.409786	0.143731	0.446483	0.042945	0.079755	0	0.003058	0.12844	0.382263	0.654434	1	0.186544	0.269113	0.394495	0.571865	0.648318	0.058104	0.296636	0.69419	0.853211	0.981651	0.522936	0.404908	0.027523	0.266055	0.486239	0.724771	0.996942	0.370031
0.264612	0.432519	0.302869	0.223404	0.17234	0.271277	0.004251	0.21254	0.426142	0.687566	0.995749	0.002125	0.277365	0.545165	0.772582	1	0.001063	0.236982	0.497343	0.733262	0.993624	0.509033	0.138151	0.352816	0.058511	0.079787	0.009574	0.001063	0.29543	0.561105	0.782147	1	0.005313	0.320935	0.534538	0.611052	0.923486	0.018066	0.190223	0.4017	0.726886	0.992561	0.595112	0.419149	0.005313	0.277365	0.504782	0.737513	0.993624	0.446334
0.294393	0.364486	0.341121	0.215962	0.201878	0.215962	0.023364	0.275701	0.495327	0.761682	1	0.009346	0.233645	0.415888	0.654206	0.953271	0.004673	0.196262	0.565421	0.82243	0.995327	0.537383	0.140187	0.32243	0.065728	0.065728	0	0.004673	0.261682	0.397196	0.64486	1	0.018692	0.046729	0.598131	0.752336	0.934579	0.11215	0.214953	0.565421	0.799065	0.990654	0.514019	0.356808	0.018692	0.317757	0.523364	0.757009	0.990654	0.364486
0.290934	0.384303	0.324763	0.210027	0.185637	0.242547	0.008119	0.286874	0.535859	0.742896	0.994587	0.002706	0.236806	0.499323	0.746955	0.997294	0.001353	0.219215	0.461434	0.753721	1	0.462788	0.253045	0.284168	0.097561	0.054201	0	0.001353	0.236806	0.50203	0.691475	1	0.005413	0.231394	0.564276	0.818674	0.97023	0.087957	0.296346	0.396482	0.7023	0.99594	0.543978	0.384824	0.006766	0.219215	0.44249	0.728011	0.99594	0.400541
0.356265	0.298526	0.345209	0.204182	0.254613	0.236162	0.002457	0.283784	0.540541	0.760442	1	0.004914	0.237101	0.455774	0.732187	0.995086	0.001229	0.22973	0.495086	0.735872	0.997543	0.465602	0.248157	0.286241	0.098401	0.059041	0.00246	0.001229	0.210074	0.469287	0.749386	1	0.038084	0.202703	0.423833	0.793612	0.997543	0.006143	0.318182	0.556511	0.707617	0.9914	0.563882	0.398524	0.003686	0.271499	0.484029	0.743243	0.997543	0.332924
0.352448	0.334266	0.313287	0.22549	0.232493	0.214286	0.002797	0.278322	0.535664	0.777622	1	0.004196	0.205594	0.448951	0.696503	0.994406	0.001399	0.272727	0.527273	0.759441	0.998601	0.373427	0.19021	0.436364	0.095238	0.072829	0.005602	0.001399	0.254545	0.507692	0.8	1	0.012587	0.193007	0.441958	0.881119	0.998601	0.034965	0.286713	0.531469	0.683916	0.93007	0.525874	0.386555	0.013986	0.26993	0.48951	0.724476	0.998601	0.352448
0.310606	0.431818	0.257576	0.274809	0.183206	0.19084	0.037879	0.257576	0.568182	0.727273	0.984848	0.015152	0.280303	0.522727	0.772727	1	0.007576	0.189394	0.340909	0.583333	0.962121	0.507576	0.492424	0	0.152672	0	0	0.007576	0.363636	0.636364	0.856061	1	0.037879	0.189394	0.356061	0.598485	0.969697	0	0	0	0	0	0.340909	0.381679	0.045455	0.204545	0.416667	0.606061	0.962121	0.431818
0.318386	0.300448	0.381166	0.184685	0.247748	0.238739	0.017937	0.251121	0.479821	0.820628	0.986547	0.008969	0.192825	0.434978	0.641256	0.982063	0.004484	0.29148	0.529148	0.753363	1	0.430493	0.286996	0.282511	0.09009	0.045045	0	0.004484	0.201794	0.452915	0.704036	1	0.008969	0.116592	0.408072	0.64574	0.995516	0.295964	0.367713	0.686099	0.896861	0.96861	0.591928	0.333333	0.013453	0.295964	0.511211	0.726457	0.991031	0.376682
0.331169	0.383117	0.285714	0.30719	0.20915	0.24183	0.038961	0.253247	0.506494	0.75974	1	0.012987	0.266234	0.551948	0.772727	0.987013	0.006494	0.168831	0.402597	0.655844	0.993506	0.454545	0.142857	0.402597	0.091503	0.078431	0.013072	0.006494	0.233766	0.584416	0.772727	1	0.012987	0.038961	0.337662	0.727273	0.909091	0.097403	0.285714	0.435065	0.636364	0.987013	0.474026	0.398693	0.006494	0.207792	0.428571	0.714286	0.993506	0.409091
0.33617	0.370213	0.293617	0.252137	0.217949	0.226496	0.008511	0.204255	0.493617	0.73617	0.961702	0.034043	0.302128	0.519149	0.761702	0.995745	0.004255	0.208511	0.459574	0.719149	1	0.459574	0.323404	0.217021	0.141026	0.055556	0.004274	0.004255	0.255319	0.480851	0.723404	1	0.114894	0.268085	0.468085	0.740426	0.940426	0.008511	0.076596	0.510638	0.795745	0.978723	0.485106	0.418803	0.012766	0.297872	0.489362	0.744681	0.978723	0.387234
0.32715	0.406408	0.266442	0.263514	0.163851	0.202703	0.003373	0.161889	0.467116	0.735245	1	0.006745	0.25801	0.526138	0.772344	0.998314	0.001686	0.317032	0.509275	0.715008	0.978078	0.50253	0.139966	0.357504	0.050676	0.077703	0.006757	0.001686	0.131535	0.376054	0.650927	1	0.183811	0.470489	0.630691	0.753794	0.887015	0.006745	0.350759	0.581788	0.789207	0.988196	0.505902	0.344595	0.006745	0.330523	0.51602	0.738617	0.966273	0.438449
0.358621	0.468966	0.172414	0.347222	0.083333	0.166667	0.027586	0.296552	0.448276	0.668966	0.972414	0.013793	0.248276	0.510345	0.82069	0.986207	0.006897	0.227586	0.524138	0.772414	1	0.717241	0.131034	0.151724	0.048611	0.048611	0.006944	0.006897	0.268966	0.448276	0.8	1	0.068966	0.089655	0.234483	0.537931	0.855172	0.151724	0.558621	0.682759	0.717241	0.758621	0.289655	0.25	0.062069	0.241379	0.565517	0.834483	0.958621	0.462069
0.446429	0.267857	0.285714	0.306306	0.234234	0.153153	0.026786	0.241071	0.571429	0.8125	0.991071	0.035714	0.267857	0.491071	0.633929	1	0.008929	0.1875	0.4375	0.732143	0.982143	0.392857	0.267857	0.339286	0.063063	0.081081	0.027027	0.008929	0.098214	0.464286	0.696429	1	0.125	0.178571	0.526786	0.642857	0.919643	0.241071	0.3125	0.714286	0.794643	0.973214	0.4375	0.396396	0.107143	0.267857	0.526786	0.696429	0.982143	0.241071
0.353646	0.328671	0.317682	0.238	0.229	0.198	0.008991	0.238761	0.481518	0.728272	1	0.001998	0.265734	0.511489	0.759241	0.995005	0.000999	0.234765	0.501499	0.737263	0.999001	0.458541	0.217782	0.323676	0.078	0.068	0.008	0.000999	0.257742	0.460539	0.696304	1	0.021978	0.317682	0.54046	0.751249	0.999001	0.007992	0.201798	0.585415	0.783217	0.989011	0.527473	0.36	0.002997	0.258741	0.548452	0.766234	0.998002	0.36963
0.337237	0.466042	0.196721	0.309859	0.126761	0.171362	0.018735	0.274005	0.559719	0.796253	0.997658	0.004684	0.220141	0.428571	0.70726	1	0.002342	0.278689	0.526932	0.765808	0.98829	0.702576	0.105386	0.192037	0.039906	0.058685	0.007042	0.002342	0.210773	0.42623	0.70726	1	0.023419	0.283372	0.613583	0.737705	0.786885	0.098361	0.491803	0.576112	0.814988	0.971897	0.334895	0.29108	0.023419	0.241218	0.487119	0.711944	0.98829	0.477752
0.419355	0.236559	0.344086	0.163043	0.336957	0.152174	0.021505	0.204301	0.44086	0.677419	0.989247	0.107527	0.247312	0.569892	0.752688	1	0.010753	0.258065	0.462366	0.817204	0.967742	0.451613	0.333333	0.215054	0.173913	0.043478	0	0.010753	0.301075	0.677419	0.870968	1	0.032258	0.247312	0.537634	0.709677	0.924731	0.11828	0.16129	0.354839	0.408602	0.462366	0.387097	0.413043	0.032258	0.236559	0.462366	0.784946	0.956989	0.236559
0.347826	0.357488	0.294686	0.257282	0.194175	0.179612	0.014493	0.227053	0.463768	0.710145	1	0.009662	0.280193	0.555556	0.772947	0.995169	0.004831	0.236715	0.478261	0.695652	0.975845	0.487923	0.173913	0.338164	0.067961	0.067961	0.019417	0.004831	0.154589	0.516908	0.714976	1	0.236715	0.309179	0.63285	0.94686	0.990338	0.038647	0.342995	0.444444	0.729469	0.922705	0.47343	0.427184	0.019324	0.352657	0.516908	0.7343	0.985507	0.386473
0.423913	0.293478	0.282609	0.274725	0.263736	0.142857	0.021739	0.282609	0.5	0.782609	1	0.032609	0.152174	0.402174	0.619565	0.967391	0.01087	0.23913	0.48913	0.728261	0.934783	0.543478	0.119565	0.336957	0.10989	0.087912	0	0.01087	0.206522	0.467391	0.663043	1	0.032609	0.043478	0.304348	0.543478	0.728261	0.076087	0.391304	0.619565	0.891304	0.978261	0.413043	0.43956	0.032609	0.217391	0.48913	0.706522	0.967391	0.25
0.372881	0.355932	0.271186	0.264957	0.273504	0.145299	0.025424	0.220339	0.491525	0.711864	1	0.042373	0.305085	0.533898	0.855932	0.991525	0.008475	0.169492	0.372881	0.644068	0.915254	0.389831	0.262712	0.347458	0.068376	0.08547	0.017094	0.008475	0.29661	0.576271	0.847458	1	0.042373	0.09322	0.415254	0.533898	0.788136	0.144068	0.220339	0.601695	0.711864	0.974576	0.440678	0.410256	0.016949	0.194915	0.432203	0.644068	0.889831	0.381356
0.428941	0.302326	0.268734	0.266839	0.256477	0.176166	0.005168	0.217054	0.457364	0.751938	0.994832	0.020672	0.299742	0.542636	0.77261	1	0.002584	0.224806	0.488372	0.726098	0.997416	0.364341	0.25323	0.382429	0.072539	0.072539	0.005181	0.002584	0.21447	0.403101	0.682171	1	0.142119	0.387597	0.503876	0.635659	0.899225	0.007752	0.22739	0.583979	0.873385	0.994832	0.475452	0.398964	0.01292	0.30491	0.534884	0.73385	0.989664	0.310078
0.39759	0.277108	0.325301	0.207317	0.207317	0.207317	0.036145	0.277108	0.46988	0.710843	0.951807	0.024096	0.13253	0.39759	0.759036	0.975904	0.012048	0.192771	0.493976	0.674699	1	0.385542	0.289157	0.325301	0.097561	0.073171	0	0.012048	0.13253	0.542169	0.819277	1	0.048193	0.301205	0.60241	0.674699	0.807229	0.144578	0.204819	0.445783	0.53012	0.951807	0.39759	0.487805	0.048193	0.180723	0.445783	0.650602	0.963855	0.301205
0.325815	0.338346	0.33584	0.202008	0.224592	0.252196	0.002506	0.261905	0.498747	0.740602	0.997494	0.005013	0.244361	0.503759	0.759398	0.998747	0.001253	0.236842	0.486216	0.725564	1	0.461153	0.245614	0.293233	0.097867	0.055207	0.002509	0.001253	0.230576	0.461153	0.73183	1	0.038847	0.201754	0.421053	0.813283	0.997494	0.006266	0.315789	0.538847	0.703008	0.989975	0.558897	0.393977	0.003759	0.266917	0.477444	0.743108	0.996241	0.337093
0.434555	0.356021	0.209424	0.335958	0.160105	0.15748	0.007853	0.267016	0.486911	0.730366	1	0.005236	0.269634	0.554974	0.740838	0.997382	0.002618	0.175393	0.390052	0.753927	0.994764	0.725131	0.086387	0.188482	0.031496	0.068241	0.010499	0.002618	0.209424	0.429319	0.667539	1	0.235602	0.298429	0.649215	0.798429	0.984293	0.099476	0.510471	0.696335	0.856021	0.989529	0.329843	0.278215	0.028796	0.240838	0.5	0.743455	0.994764	0.387435
0.373344	0.31043	0.316225	0.195526	0.243579	0.203811	0.001656	0.24255	0.514073	0.695364	0.999172	0.002483	0.286424	0.53394	0.816225	0.998344	0.000828	0.235099	0.444536	0.733444	1	0.428808	0.086093	0.485099	0.033969	0.075394	0.0058	0.000828	0.264901	0.53394	0.835265	1	0.00745	0.235927	0.299669	0.509934	0.961921	0.005795	0.196192	0.499172	0.698675	0.976821	0.419702	0.404308	0.003311	0.226821	0.418874	0.711093	0.997517	0.332781
0.383356	0.326057	0.290587	0.25	0.229508	0.173497	0.005457	0.236016	0.523874	0.793997	1	0.002729	0.249659	0.492497	0.731241	0.995907	0.001364	0.255116	0.457026	0.698499	0.997271	0.480218	0.060027	0.459754	0.02459	0.095628	0.010929	0.001364	0.244202	0.476126	0.806276	1	0.155525	0.321965	0.357435	0.854025	0.897681	0.00955	0.229195	0.515689	0.695771	0.986357	0.432469	0.423497	0.008186	0.276944	0.435198	0.658936	0.994543	0.342428
0.31411	0.364417	0.321472	0.210074	0.246929	0.230958	0.002454	0.280982	0.531288	0.757055	0.998773	0.004908	0.235583	0.480982	0.746012	1	0.001227	0.238037	0.493252	0.748466	0.997546	0.46135	0.245399	0.293252	0.095823	0.061425	0.004914	0.001227	0.207362	0.457669	0.728834	1	0.039264	0.257669	0.422086	0.809816	0.997546	0.006135	0.320245	0.573006	0.732515	0.991411	0.561963	0.415233	0.003681	0.257669	0.469939	0.739877	0.997546	0.402454
0.409253	0.323843	0.266904	0.253571	0.257143	0.139286	0.010676	0.241993	0.512456	0.740214	1	0.007117	0.217082	0.441281	0.765125	0.992883	0.003559	0.284698	0.494662	0.72242	0.975089	0.537367	0.117438	0.345196	0.039286	0.053571	0.010714	0.003559	0.330961	0.466192	0.754448	1	0.02847	0.078292	0.615658	0.669039	0.797153	0.081851	0.181495	0.320285	0.743772	0.950178	0.44484	0.428571	0.017794	0.288256	0.508897	0.743772	0.975089	0.359431
0.349495	0.278788	0.371717	0.15587	0.299595	0.228745	0.010101	0.248485	0.50101	0.727273	1	0.00404	0.286869	0.507071	0.737374	0.989899	0.00202	0.218182	0.472727	0.761616	0.983838	0.375758	0.131313	0.492929	0.05668	0.076923	0.016194	0.00202	0.171717	0.482828	0.729293	1	0.084848	0.319192	0.571717	0.670707	0.937374	0.008081	0.244444	0.474747	0.761616	0.975758	0.547475	0.437247	0.008081	0.270707	0.50101	0.739394	0.985859	0.292929
0.338816	0.388158	0.273026	0.343234	0.171617	0.191419	0.013158	0.190789	0.427632	0.75	0.993421	0.006579	0.325658	0.572368	0.805921	0.996711	0.003289	0.213816	0.4375	0.684211	1	0.641447	0.296053	0.0625	0.132013	0.039604	0	0.003289	0.240132	0.539474	0.802632	1	0.009868	0.266447	0.398026	0.628289	0.980263	0.069079	0.078947	0.161184	0.819079	0.842105	0.506579	0.330033	0.009868	0.328947	0.532895	0.710526	0.973684	0.358553
0.365385	0.326923	0.307692	0.223301	0.281553	0.194175	0.019231	0.240385	0.480769	0.711538	0.990385	0.086538	0.25	0.567308	0.778846	1	0.009615	0.182692	0.461538	0.692308	0.961538	0.413462	0.298077	0.288462	0.106796	0.048544	0.009709	0.009615	0.288462	0.663462	0.798077	1	0.115385	0.365385	0.625	0.836538	0.961538	0.028846	0.144231	0.221154	0.461538	0.538462	0.346154	0.38835	0.028846	0.153846	0.413462	0.625	0.961538	0.336538
0.289662	0.450358	0.25998	0.242828	0.148566	0.240779	0.004094	0.185261	0.455476	0.763562	0.998976	0.002047	0.27738	0.524053	0.74002	0.997953	0.001024	0.254862	0.451382	0.743091	1	0.576254	0.107472	0.316274	0.04918	0.071721	0.004098	0.001024	0.323439	0.576254	0.787103	1	0.037871	0.174002	0.30911	0.433982	0.995906	0.047083	0.209826	0.418628	0.735926	0.993859	0.426817	0.432377	0.012282	0.283521	0.510747	0.77175	0.995906	0.456499
0.35468	0.347291	0.29803	0.254321	0.195062	0.204938	0.017241	0.256158	0.504926	0.76601	0.995074	0.009852	0.253695	0.502463	0.729064	0.997537	0.002463	0.199507	0.490148	0.736453	1	0.352217	0.150246	0.497537	0.064198	0.083951	0.004938	0.002463	0.229064	0.554187	0.807882	1	0.046798	0.189655	0.546798	0.935961	0.992611	0.014778	0.263547	0.445813	0.689655	0.891626	0.591133	0.380247	0.004926	0.253695	0.475369	0.699507	0.987685	0.366995
0.398058	0.281553	0.320388	0.254902	0.196078	0.186275	0.029126	0.165049	0.436893	0.650485	0.990291	0.019417	0.291262	0.495146	0.757282	1	0.009709	0.262136	0.466019	0.737864	0.951456	0.524272	0.359223	0.116505	0.127451	0.029412	0.009804	0.009709	0.203883	0.572816	0.854369	1	0.223301	0.339806	0.524272	0.718447	0.961165	0.116505	0.135922	0.165049	0.407767	0.436893	0.456311	0.333333	0.116505	0.320388	0.466019	0.737864	0.951456	0.378641
0.360775	0.271186	0.368039	0.196602	0.240291	0.201456	0.012107	0.249395	0.532688	0.774818	0.987893	0.004843	0.239709	0.472155	0.699758	0.990315	0.002421	0.251816	0.486683	0.753027	1	0.358354	0.138015	0.503632	0.082524	0.106796	0.004854	0.002421	0.208232	0.539952	0.813559	1	0.038741	0.16707	0.513317	0.917676	0.997579	0.007264	0.25908	0.464891	0.702179	0.951574	0.583535	0.373786	0.007264	0.242131	0.457627	0.677966	0.995157	0.268765
0.304348	0.347826	0.347826	0.208791	0.208791	0.21978	0.043478	0.326087	0.586957	0.771739	0.978261	0.021739	0.184783	0.423913	0.630435	1	0.01087	0.25	0.532609	0.728261	0.98913	0.347826	0.347826	0.304348	0.10989	0.043956	0	0.01087	0.130435	0.597826	0.804348	1	0.054348	0.369565	0.695652	0.891304	0.978261	0.152174	0.217391	0.434783	0.51087	0.586957	0.576087	0.307692	0.054348	0.206522	0.413043	0.597826	0.967391	0.369565
0.336842	0.336842	0.326316	0.21164	0.259259	0.26455	0.021053	0.242105	0.478947	0.736842	1	0.010526	0.184211	0.431579	0.731579	0.984211	0.005263	0.321053	0.542105	0.757895	0.973684	0.405263	0.473684	0.121053	0.164021	0.037037	0.005291	0.005263	0.284211	0.589474	0.815789	1	0.010526	0.336842	0.531579	0.705263	0.978947	0.078947	0.1	0.242105	0.289474	0.736842	0.468421	0.507937	0.015789	0.257895	0.478947	0.726316	0.984211	0.342105
0.39483	0.373678	0.231492	0.317647	0.172941	0.174118	0.0047	0.19389	0.458284	0.728555	1	0.00235	0.243243	0.473561	0.753231	0.998825	0.001175	0.393655	0.567568	0.766157	0.99765	0.571093	0.108108	0.320799	0.04	0.068235	0.002353	0.001175	0.182139	0.383079	0.745006	1	0.130435	0.478261	0.573443	0.714454	0.915394	0.047004	0.368978	0.584019	0.760282	0.996475	0.427732	0.327059	0.005875	0.400705	0.581669	0.759107	0.99765	0.407756
0.488318	0.285047	0.226636	0.29274	0.234192	0.100703	0.007009	0.259346	0.495327	0.754673	1	0.004673	0.273364	0.586449	0.829439	0.995327	0.002336	0.168224	0.364486	0.61215	0.992991	0.481308	0.175234	0.343458	0.079625	0.065574	0.004684	0.002336	0.254673	0.602804	0.859813	1	0.109813	0.320093	0.544393	0.703271	0.904206	0.023364	0.154206	0.448598	0.586449	0.978972	0.315421	0.346604	0.023364	0.158879	0.36215	0.614486	0.939252	0.352804
0.246753	0.493506	0.25974	0.235294	0.117647	0.24183	0.025974	0.292208	0.577922	0.733766	0.974026	0.012987	0.201299	0.415584	0.701299	1	0.006494	0.227273	0.558442	0.772727	0.987013	0.681818	0.266234	0.051948	0.084967	0.006536	0.019608	0.006494	0.168831	0.337662	0.707792	1	0.376623	0.493506	0.623377	0.772727	0.987013	0.38961	0.396104	0.409091	0.642857	0.655844	0.428571	0.352941	0.123377	0.357143	0.538961	0.753247	0.987013	0.474026
0.410959	0.214612	0.374429	0.178899	0.348624	0.169725	0.013699	0.255708	0.484018	0.707763	1	0.009132	0.136986	0.60274	0.849315	0.968037	0.004566	0.246575	0.488584	0.69863	0.990868	0.365297	0.228311	0.406393	0.073394	0.055046	0	0.004566	0.228311	0.392694	0.844749	1	0.045662	0.260274	0.515982	0.757991	0.995434	0.127854	0.223744	0.575342	0.680365	0.885845	0.557078	0.449541	0.022831	0.242009	0.534247	0.767123	0.990868	0.210046
0.357977	0.459144	0.182879	0.332031	0.175781	0.140625	0.011673	0.225681	0.521401	0.762646	0.992218	0.007782	0.241245	0.494163	0.774319	1	0.003891	0.322957	0.474708	0.66537	0.988327	0.719844	0.101167	0.178988	0.03125	0.03125	0	0.003891	0.22179	0.400778	0.762646	1	0.416342	0.513619	0.540856	0.595331	0.708171	0.035019	0.07393	0.610895	0.937743	0.984436	0.361868	0.335938	0.019455	0.272374	0.490272	0.684825	0.988327	0.501946
0.330935	0.359712	0.309353	0.202899	0.217391	0.23913	0.014388	0.302158	0.503597	0.827338	0.985612	0.028777	0.280576	0.532374	0.719424	1	0.007194	0.194245	0.410072	0.647482	0.992806	0.345324	0.309353	0.345324	0.123188	0.07971	0.007246	0.007194	0.230216	0.453237	0.697842	1	0.021583	0.258993	0.489209	0.71223	0.992806	0.05036	0.129496	0.539568	0.798561	0.913669	0.539568	0.463768	0.021583	0.23741	0.489209	0.726619	0.978417	0.467626
0.294671	0.46395	0.241379	0.27044	0.147799	0.213836	0.009404	0.188088	0.470219	0.717868	1	0.00627	0.200627	0.45768	0.755486	0.996865	0.003135	0.360502	0.570533	0.777429	0.978056	0.489028	0.153605	0.357367	0.044025	0.069182	0	0.003135	0.122257	0.341693	0.69906	1	0.275862	0.423197	0.485893	0.658307	0.739812	0.184953	0.369906	0.586207	0.830721	0.968652	0.485893	0.358491	0.012539	0.322884	0.526646	0.702194	0.968652	0.460815
0.481928	0.253012	0.26506	0.268293	0.231707	0.121951	0.060241	0.289157	0.46988	0.686747	1	0.024096	0.26506	0.506024	0.831325	0.987952	0.012048	0.180723	0.481928	0.698795	0.903614	0.253012	0	0.746988	0	0.073171	0	0.012048	0.060241	0.325301	0.771084	1	0	0	0	0	0	0.072289	0.240964	0.493976	0.674699	0.927711	0.325301	0.365854	0.072289	0.192771	0.566265	0.795181	0.915663	0.277108
0.340136	0.340136	0.319728	0.253425	0.246575	0.226027	0.034014	0.285714	0.557823	0.748299	1	0.020408	0.176871	0.360544	0.591837	0.993197	0.006803	0.319728	0.564626	0.755102	0.972789	0.639456	0.156463	0.204082	0.054795	0.054795	0.013699	0.006803	0.170068	0.333333	0.591837	1	0.129252	0.52381	0.761905	0.823129	0.986395	0.027211	0.557823	0.659864	0.884354	0.938776	0.408163	0.410959	0.027211	0.285714	0.455782	0.741497	0.972789	0.360544
0.457143	0.285714	0.257143	0.259615	0.192308	0.163462	0.019048	0.142857	0.428571	0.752381	1	0.028571	0.4	0.6	0.828571	0.990476	0.009524	0.238095	0.438095	0.685714	0.857143	0.714286	0.028571	0.257143	0.038462	0.038462	0	0.009524	0.171429	0.457143	0.819048	1	0.257143	0.257143	0.257143	0.266667	0.438095	0.314286	0.361905	0.571429	0.638095	0.704762	0.32381	0.384615	0.171429	0.342857	0.561905	0.695238	0.904762	0.295238
0.35461	0.248227	0.397163	0.192857	0.271429	0.178571	0.021277	0.205674	0.48227	0.723404	1	0.035461	0.35461	0.510638	0.702128	0.985816	0.007092	0.163121	0.475177	0.758865	0.978723	0.319149	0.148936	0.531915	0.05	0.092857	0.007143	0.007092	0.319149	0.446809	0.751773	1	0.120567	0.390071	0.48227	0.51773	0.787234	0.021277	0.184397	0.567376	0.702128	0.971631	0.489362	0.414286	0.021277	0.191489	0.510638	0.716312	0.971631	0.205674
0.418605	0.348837	0.232558	0.3125	0.226562	0.1875	0.062016	0.325581	0.573643	0.821705	1	0.015504	0.186047	0.472868	0.744186	0.992248	0.007752	0.193798	0.410853	0.542636	0.945736	0.534884	0.139535	0.325581	0.0625	0.078125	0	0.007752	0.302326	0.697674	0.829457	1	0.023256	0.108527	0.147287	0.503876	0.914729	0.209302	0.27907	0.44186	0.565891	0.651163	0.387597	0.421875	0.015504	0.155039	0.372093	0.627907	0.829457	0.333333
0.289593	0.420814	0.289593	0.213636	0.159091	0.227273	0.022624	0.20362	0.542986	0.80543	0.995475	0.00905	0.208145	0.470588	0.687783	1	0.004525	0.303167	0.488688	0.764706	0.986425	0.647059	0.180995	0.171946	0.081818	0.054545	0.018182	0.004525	0.221719	0.538462	0.782805	1	0.167421	0.447964	0.651584	0.764706	0.941176	0.022624	0.117647	0.348416	0.402715	0.977376	0.533937	0.263636	0.099548	0.348416	0.547511	0.742081	0.972851	0.434389
0.306383	0.32766	0.365957	0.213675	0.230769	0.230769	0.029787	0.26383	0.582979	0.812766	0.987234	0.008511	0.238298	0.421277	0.689362	0.995745	0.004255	0.221277	0.493617	0.72766	1	0.438298	0.374468	0.187234	0.136752	0.051282	0.017094	0.004255	0.246809	0.468085	0.67234	1	0.008511	0.170213	0.331915	0.574468	0.804255	0.391489	0.719149	0.86383	0.919149	0.965957	0.561702	0.350427	0.008511	0.27234	0.510638	0.72766	0.948936	0.357447
0.332	0.368	0.3	0.228916	0.164659	0.232932	0.008	0.22	0.528	0.832	0.996	0.044	0.204	0.4	0.68	1	0.004	0.296	0.54	0.76	0.984	0.464	0.184	0.352	0.052209	0.052209	0.012048	0.004	0.144	0.356	0.624	1	0.18	0.24	0.308	0.564	0.856	0.012	0.472	0.684	0.9	0.988	0.544	0.337349	0.024	0.312	0.552	0.756	0.984	0.412
0.345291	0.340807	0.313901	0.256757	0.207207	0.193694	0.03139	0.26009	0.493274	0.766816	1	0.008969	0.269058	0.538117	0.780269	0.995516	0.004484	0.201794	0.426009	0.681614	0.977578	0.457399	0.103139	0.439462	0.04955	0.094595	0.004505	0.004484	0.125561	0.300448	0.623318	1	0.013453	0.179372	0.641256	0.668161	0.713004	0.165919	0.443946	0.587444	0.807175	0.991031	0.484305	0.459459	0.017937	0.309417	0.506726	0.748879	0.982063	0.358744
0.348457	0.350272	0.30127	0.250909	0.201818	0.218182	0.016334	0.274047	0.551724	0.818512	1	0.00363	0.235935	0.517241	0.738657	0.99274	0.001815	0.23049	0.441016	0.656987	0.99637	0.479129	0.07078	0.450091	0.023636	0.081818	0.005455	0.001815	0.263158	0.642468	0.836661	1	0.056261	0.07078	0.190563	0.566243	0.764065	0.005445	0.299456	0.46098	0.624319	0.989111	0.515426	0.309091	0.00726	0.235935	0.466425	0.646098	0.99637	0.388385
0.357419	0.345806	0.296774	0.237573	0.222079	0.198192	0.002581	0.251613	0.507097	0.745806	0.999355	0.00129	0.241935	0.459355	0.740645	1	0.000645	0.265806	0.530968	0.766452	0.996774	0.46	0.176774	0.363226	0.090381	0.069722	0.005165	0.000645	0.269677	0.46	0.734194	1	0.003226	0.375484	0.6	0.736129	0.963226	0.006452	0.169677	0.502581	0.763871	0.992903	0.474839	0.415752	0.003226	0.266452	0.516774	0.766452	0.996774	0.356129
0.404624	0.289017	0.306358	0.244186	0.255814	0.180233	0.011561	0.260116	0.433526	0.705202	0.988439	0.046243	0.231214	0.624277	0.803468	1	0.00578	0.179191	0.445087	0.67052	0.976879	0.369942	0.265896	0.364162	0.104651	0.05814	0.011628	0.00578	0.138728	0.508671	0.722543	1	0.011561	0.208092	0.526012	0.757225	0.843931	0.144509	0.294798	0.387283	0.606936	0.988439	0.364162	0.465116	0.017341	0.179191	0.456647	0.676301	0.976879	0.289017
0.396667	0.256667	0.346667	0.207358	0.230769	0.19398	0.01	0.276667	0.493333	0.74	1	0.016667	0.193333	0.476667	0.75	0.986667	0.003333	0.266667	0.5	0.76	0.993333	0.403333	0.25	0.346667	0.073579	0.053512	0	0.003333	0.203333	0.483333	0.7	1	0.02	0.18	0.5	0.77	0.933333	0.06	0.336667	0.536667	0.68	0.976667	0.556667	0.354515	0.016667	0.21	0.466667	0.71	0.986667	0.253333
0.40625	0.260417	0.333333	0.162304	0.272251	0.172775	0.010417	0.260417	0.546875	0.755208	1	0.020833	0.208333	0.484375	0.765625	0.96875	0.005208	0.234375	0.473958	0.682292	0.989583	0.395833	0.411458	0.192708	0.146597	0.031414	0	0.005208	0.260417	0.604167	0.848958	1	0.015625	0.145833	0.453125	0.640625	0.953125	0.317708	0.359375	0.40625	0.786458	0.838542	0.4375	0.450262	0.03125	0.348958	0.479167	0.640625	0.942708	0.229167
0.419708	0.383212	0.19708	0.285714	0.190476	0.14652	0.014599	0.215328	0.452555	0.711679	0.992701	0.007299	0.262774	0.554745	0.773723	0.99635	0.00365	0.310219	0.419708	0.726277	1	0.656934	0.083942	0.259124	0.029304	0.058608	0	0.00365	0.208029	0.448905	0.715328	1	0.313869	0.328467	0.423358	0.474453	0.576642	0.010949	0.372263	0.605839	0.828467	0.992701	0.357664	0.380952	0.010949	0.321168	0.474453	0.806569	0.989051	0.39781
0.341818	0.298182	0.36	0.193078	0.271403	0.214936	0.003636	0.267273	0.512727	0.769091	1	0.012727	0.201818	0.445455	0.66	0.996364	0.001818	0.292727	0.529091	0.778182	0.992727	0.425455	0.085455	0.489091	0.041894	0.081967	0.001821	0.001818	0.256364	0.427273	0.650909	1	0.005455	0.214545	0.34	0.534545	0.612727	0.04	0.309091	0.643636	0.807273	0.996364	0.572727	0.404372	0.007273	0.232727	0.529091	0.730909	0.996364	0.336364
0.382022	0.393258	0.224719	0.295455	0.181818	0.181818	0.033708	0.146067	0.359551	0.640449	0.966292	0.022472	0.280899	0.483146	0.685393	0.988764	0.011236	0.404494	0.696629	0.797753	1	0.348315	0.033708	0.617978	0.022727	0.090909	0	0.011236	0.483146	0.606742	0.876404	1	0.94382	0.94382	0.94382	0.955056	0.966292	0.033708	0.168539	0.325843	0.674157	0.865169	0.348315	0.409091	0.146067	0.303371	0.651685	0.786517	0.94382	0.359551
0.373606	0.405204	0.22119	0.255121	0.148976	0.188082	0.005576	0.369888	0.635688	0.834572	1	0.003717	0.224907	0.39777	0.654275	0.994424	0.001859	0.159851	0.468401	0.684015	0.996283	0.546468	0.013011	0.44052	0.009311	0.083799	0.001862	0.001859	0.245353	0.3829	0.669145	1	0.420074	0.420074	0.942379	0.990706	0.994424	0.01487	0.169145	0.615242	0.765799	0.94052	0.381041	0.357542	0.013011	0.19145	0.477695	0.674721	0.996283	0.442379
0.34143	0.438596	0.219973	0.268919	0.154054	0.195946	0.005398	0.225371	0.445344	0.748988	1	0.002699	0.261808	0.550607	0.774629	0.99865	0.00135	0.249663	0.418354	0.665317	0.983806	0.775978	0.087719	0.136302	0.051351	0.043243	0.005405	0.00135	0.249663	0.560054	0.796221	1	0.010796	0.265857	0.368421	0.483131	0.883941	0.021592	0.237517	0.34413	0.59919	0.960864	0.360324	0.32973	0.009447	0.249663	0.431849	0.574899	0.974359	0.45614
0.485265	0.310413	0.204322	0.281496	0.173228	0.151575	0.009823	0.174853	0.449902	0.75835	1	0.003929	0.330059	0.534381	0.781925	0.994106	0.001965	0.337917	0.485265	0.638507	0.950884	0.638507	0.119843	0.24165	0.05315	0.072835	0.001969	0.001965	0.267191	0.526523	0.774067	1	0.332024	0.428291	0.51277	0.626719	0.943026	0.019646	0.159136	0.373281	0.650295	0.935167	0.273084	0.287402	0.017682	0.385069	0.540275	0.666012	0.962672	0.375246
0.3	0.429412	0.270588	0.260355	0.16568	0.224852	0.088235	0.323529	0.488235	0.735294	0.994118	0.011765	0.217647	0.511765	0.752941	0.982353	0.005882	0.176471	0.464706	0.723529	1	0.405882	0.235294	0.358824	0.076923	0.076923	0.005917	0.005882	0.188235	0.423529	0.694118	1	0.058824	0.176471	0.470588	0.570588	0.858824	0.1	0.352941	0.652941	0.782353	0.970588	0.535294	0.284024	0.023529	0.164706	0.470588	0.729412	0.988235	0.417647
0.40367	0.275229	0.321101	0.203704	0.25	0.222222	0.027523	0.302752	0.633028	0.816514	1	0.018349	0.211009	0.53211	0.678899	0.990826	0.009174	0.201835	0.394495	0.577982	0.981651	0.522936	0.302752	0.174312	0.101852	0.046296	0.027778	0.009174	0.275229	0.669725	0.798165	1	0.201835	0.302752	0.40367	0.504587	0.926606	0.073394	0.100917	0.146789	0.53211	0.908257	0.449541	0.314815	0.06422	0.247706	0.40367	0.559633	0.981651	0.284404
0.295345	0.382825	0.32183	0.211245	0.200803	0.235341	0.002408	0.271268	0.540931	0.761637	1	0.00321	0.213483	0.446228	0.716693	0.999197	0.000803	0.29053	0.520867	0.764045	0.997592	0.475923	0.108347	0.41573	0.04257	0.079518	0.004016	0.000803	0.158909	0.385233	0.684591	1	0.004815	0.307384	0.509631	0.697432	0.869984	0.024077	0.373997	0.616372	0.843499	0.998395	0.521669	0.380723	0.005618	0.284109	0.516854	0.748796	0.998395	0.403692
0.378947	0.294737	0.326316	0.223404	0.287234	0.138298	0.021053	0.189474	0.473684	0.694737	0.989474	0.031579	0.294737	0.526316	0.789474	0.978947	0.010526	0.221053	0.484211	0.736842	1	0.484211	0.494737	0.021053	0.148936	0.021277	0	0.010526	0.2	0.610526	0.726316	1	0.126316	0.263158	0.484211	0.747368	0.894737	0.042105	0.042105	0.042105	0.042105	0.052632	0.4	0.276596	0.147368	0.284211	0.536842	0.8	0.905263	0.305263
0.430233	0.27907	0.290698	0.294118	0.247059	0.152941	0.034884	0.255814	0.476744	0.662791	0.953488	0.023256	0.186047	0.546512	0.813953	0.988372	0.011628	0.232558	0.465116	0.686047	1	0.174419	0	0.825581	0	0.094118	0	0.011628	0.034884	0.5	0.767442	1	0	0	0	0	0	0.05814	0.244186	0.453488	0.709302	0.976744	0.313953	0.447059	0.081395	0.232558	0.546512	0.72093	0.965116	0.27907
0.459916	0.232068	0.308017	0.211864	0.292373	0.161017	0.012658	0.248945	0.489451	0.751055	1	0.008439	0.261603	0.438819	0.662447	0.995781	0.004219	0.21519	0.523207	0.767932	0.978903	0.362869	0.177215	0.459916	0.04661	0.072034	0.004237	0.004219	0.206751	0.35443	0.7173	1	0.016878	0.080169	0.160338	0.248945	0.734177	0.362869	0.493671	0.628692	0.801688	0.974684	0.333333	0.466102	0.033755	0.244726	0.514768	0.742616	0.978903	0.265823
0.303213	0.371486	0.325301	0.209256	0.225352	0.247485	0.006024	0.196787	0.518072	0.742972	0.997992	0.008032	0.289157	0.51004	0.738956	1	0.002008	0.238956	0.459839	0.757028	0.995984	0.403614	0.216867	0.379518	0.110664	0.066398	0.006036	0.002008	0.285141	0.552209	0.773092	1	0.044177	0.299197	0.526104	0.809237	0.985944	0.11245	0.226908	0.415663	0.646586	0.963855	0.644578	0.37827	0.01004	0.311245	0.512048	0.763052	0.987952	0.399598
0.331307	0.410334	0.258359	0.323171	0.170732	0.246951	0.033435	0.346505	0.56535	0.787234	0.993921	0.006079	0.173252	0.413374	0.699088	1	0.00304	0.191489	0.510638	0.753799	0.969605	0.537994	0.221884	0.240122	0.088415	0.051829	0.003049	0.00304	0.243161	0.422492	0.723404	1	0.015198	0.288754	0.583587	0.756839	0.969605	0.036474	0.197568	0.504559	0.784195	0.927052	0.422492	0.353659	0.012158	0.164134	0.477204	0.75076	0.972644	0.43465
0.4	0.295652	0.304348	0.245614	0.236842	0.140351	0.017391	0.234783	0.495652	0.756522	1	0.026087	0.243478	0.513043	0.782609	0.965217	0.008696	0.2	0.391304	0.686957	0.852174	0.347826	0.269565	0.382609	0.070175	0.070175	0.017544	0.008696	0.295652	0.486957	0.843478	1	0.034783	0.086957	0.417391	0.530435	0.8	0.13913	0.226087	0.634783	0.756522	0.956522	0.452174	0.403509	0.034783	0.2	0.452174	0.678261	0.913043	0.304348
0.359667	0.334719	0.305613	0.227083	0.235417	0.216667	0.02079	0.243243	0.471933	0.742204	0.989605	0.004158	0.266112	0.588358	0.844075	1	0.002079	0.234927	0.449064	0.650728	0.991684	0.403326	0.367983	0.22869	0.095833	0.058333	0.020833	0.002079	0.22869	0.50104	0.735967	1	0.02079	0.261954	0.463617	0.663202	0.898129	0.039501	0.245322	0.596674	0.900208	0.991684	0.440748	0.4	0.006237	0.27027	0.474012	0.677755	0.991684	0.367983
0.378007	0.257732	0.364261	0.2	0.275862	0.17931	0.006873	0.316151	0.553265	0.742268	0.975945	0.010309	0.158076	0.38488	0.745704	0.993127	0.003436	0.278351	0.501718	0.735395	1	0.381443	0.268041	0.350515	0.072414	0.051724	0.003448	0.003436	0.216495	0.446735	0.752577	1	0.013746	0.182131	0.522337	0.783505	0.955326	0.054983	0.274914	0.491409	0.67354	0.910653	0.573883	0.337931	0.010309	0.199313	0.43299	0.714777	0.989691	0.278351
0.291262	0.395071	0.313667	0.227952	0.162182	0.247384	0.001494	0.26587	0.494399	0.752054	0.992532	0.002987	0.231516	0.474235	0.734877	0.999253	0.000747	0.246453	0.525019	0.754294	1	0.533234	0.394324	0.072442	0.130045	0.028401	0.005979	0.000747	0.256161	0.480956	0.716953	1	0.00224	0.228529	0.485437	0.722928	0.932786	0.003734	0.373413	0.93652	0.970127	0.994025	0.619119	0.300448	0.00224	0.245706	0.49888	0.755041	0.998506	0.436146
0.316731	0.372925	0.310345	0.21867	0.212276	0.236573	0.006386	0.293742	0.49553	0.766284	1	0.002554	0.229885	0.517241	0.756066	0.998723	0.001277	0.234994	0.480204	0.727969	0.989783	0.421456	0.254151	0.324393	0.076726	0.058824	0.005115	0.001277	0.190294	0.512133	0.720307	1	0.010217	0.199234	0.598978	0.828863	0.992337	0.034483	0.323116	0.430396	0.733078	0.971903	0.590038	0.355499	0.003831	0.218391	0.485313	0.688378	0.983397	0.403576
0.401961	0.294118	0.303922	0.237624	0.207921	0.178218	0.039216	0.27451	0.558824	0.735294	1	0.019608	0.22549	0.441176	0.794118	0.990196	0.009804	0.147059	0.45098	0.686275	0.892157	0.509804	0.196078	0.294118	0.089109	0.069307	0.009901	0.009804	0.215686	0.372549	0.647059	1	0.117647	0.284314	0.54902	0.686275	0.735294	0.029412	0.392157	0.470588	0.813725	0.892157	0.401961	0.356436	0.029412	0.176471	0.421569	0.686275	0.882353	0.27451
0.436893	0.271845	0.291262	0.323529	0.254902	0.127451	0.07767	0.31068	0.533981	0.776699	1	0.029126	0.23301	0.514563	0.796117	0.970874	0.009709	0.145631	0.38835	0.660194	0.873786	0.446602	0.203883	0.349515	0.078431	0.058824	0	0.009709	0.242718	0.737864	0.883495	1	0.038835	0.281553	0.368932	0.417476	0.504854	0.067961	0.145631	0.582524	0.669903	0.873786	0.368932	0.392157	0.038835	0.242718	0.38835	0.601942	0.815534	0.330097
0.498559	0.270893	0.230548	0.242775	0.231214	0.138728	0.008646	0.216138	0.414986	0.752161	0.994236	0.005764	0.311239	0.527378	0.723343	0.991354	0.002882	0.308357	0.510086	0.731988	1	0.487032	0.069164	0.443804	0.040462	0.080925	0	0.002882	0.247839	0.420749	0.668588	1	0.011527	0.051873	0.423631	0.504323	0.59366	0.095101	0.345821	0.616715	0.778098	0.994236	0.291066	0.312139	0.014409	0.420749	0.585014	0.720461	0.997118	0.340058
0.41637	0.238434	0.345196	0.157143	0.307143	0.167857	0.032028	0.270463	0.505338	0.768683	0.989324	0.014235	0.231317	0.491103	0.718861	1	0.003559	0.234875	0.483986	0.711744	0.985765	0.3879	0.188612	0.423488	0.057143	0.078571	0	0.003559	0.19573	0.434164	0.704626	1	0.007117	0.295374	0.441281	0.644128	0.740214	0.053381	0.256228	0.537367	0.83274	0.992883	0.55516	0.414286	0.007117	0.245552	0.476868	0.66548	0.985765	0.224199
0.365722	0.336032	0.298246	0.233784	0.225676	0.17973	0.002699	0.238866	0.503374	0.751687	0.982456	0.004049	0.242915	0.502024	0.761134	0.99865	0.00135	0.252362	0.487179	0.724696	1	0.489879	0.048583	0.461538	0.022973	0.117568	0.004054	0.00135	0.240216	0.502024	0.767881	1	0.072874	0.564103	0.585695	0.677463	0.817814	0.005398	0.236167	0.460189	0.754386	0.964912	0.561404	0.408108	0.004049	0.272605	0.487179	0.708502	0.995951	0.357625
0.448485	0.369697	0.181818	0.317073	0.189024	0.121951	0.024242	0.242424	0.509091	0.775758	1	0.012121	0.163636	0.381818	0.727273	0.981818	0.006061	0.406061	0.557576	0.69697	0.884848	0.575758	0.151515	0.272727	0.054878	0.054878	0.030488	0.006061	0.139394	0.30303	0.624242	1	0.242424	0.4	0.606061	0.666667	0.860606	0.406061	0.466667	0.775758	0.866667	0.939394	0.436364	0.390244	0.078788	0.278788	0.466667	0.69697	0.933333	0.430303
0.38843	0.31405	0.297521	0.258333	0.241667	0.191667	0.016529	0.181818	0.528926	0.735537	0.991736	0.057851	0.31405	0.504132	0.826446	0.975207	0.008264	0.231405	0.413223	0.677686	1	0.380165	0.214876	0.404959	0.083333	0.066667	0	0.008264	0.231405	0.446281	0.752066	1	0.280992	0.322314	0.404959	0.487603	0.85124	0.082645	0.173554	0.619835	0.719008	0.958678	0.429752	0.283333	0.049587	0.355372	0.504132	0.793388	0.983471	0.31405
0.367816	0.275862	0.356322	0.255814	0.290698	0.186047	0.034483	0.252874	0.482759	0.770115	1	0.126437	0.275862	0.574713	0.747126	0.965517	0.011494	0.114943	0.413793	0.643678	0.988506	0.448276	0.321839	0.229885	0.139535	0.046512	0	0.011494	0.229885	0.643678	0.793103	1	0.045977	0.298851	0.597701	0.816092	0.954023	0.137931	0.183908	0.390805	0.448276	0.505747	0.367816	0.418605	0.045977	0.206897	0.45977	0.62069	0.977011	0.321839
0.342357	0.356688	0.300955	0.236045	0.220096	0.218501	0.003185	0.213376	0.414013	0.694268	0.993631	0.007962	0.242038	0.542994	0.737261	1	0.001592	0.30414	0.523885	0.778662	0.996815	0.514331	0.171975	0.313694	0.057416	0.073365	0.00319	0.001592	0.154459	0.466561	0.711783	1	0.017516	0.211783	0.436306	0.773885	0.893312	0.179936	0.36465	0.584395	0.724522	0.996815	0.479299	0.417863	0.007962	0.242038	0.479299	0.759554	0.996815	0.390127
0.361039	0.47013	0.168831	0.302083	0.125	0.127604	0.007792	0.212987	0.425974	0.690909	0.997403	0.005195	0.348052	0.633766	0.802597	1	0.002597	0.145455	0.34026	0.467532	0.981818	0.716883	0.155844	0.127273	0.059896	0.033854	0.002604	0.002597	0.387013	0.641558	0.820779	1	0.064935	0.168831	0.254545	0.405195	0.490909	0.054545	0.114286	0.27013	0.355844	0.509091	0.654545	0.197917	0.062338	0.412987	0.65974	0.823377	0.994805	0.496104
0.384712	0.270677	0.344612	0.205772	0.292346	0.200753	0.007519	0.263158	0.501253	0.756892	1	0.005013	0.236842	0.483709	0.734336	0.994987	0.001253	0.240602	0.508772	0.746867	0.997494	0.463659	0.241855	0.294486	0.105395	0.055207	0.002509	0.001253	0.23183	0.483709	0.739348	1	0.038847	0.197995	0.41604	0.795739	0.997494	0.006266	0.319549	0.541353	0.703008	0.992481	0.570175	0.409034	0.003759	0.264411	0.47619	0.741855	0.997494	0.303258
0.384615	0.318681	0.296703	0.222222	0.222222	0.211111	0.021978	0.230769	0.461538	0.758242	0.967033	0.043956	0.197802	0.384615	0.637363	1	0.010989	0.241758	0.527473	0.835165	0.978022	0.32967	0.351648	0.318681	0.1	0.055556	0.011111	0.010989	0.32967	0.527473	0.692308	1	0.032967	0.10989	0.494505	0.659341	0.967033	0.153846	0.21978	0.296703	0.769231	0.901099	0.461538	0.444444	0.043956	0.197802	0.527473	0.747253	0.978022	0.263736
0.444444	0.261111	0.294444	0.256983	0.307263	0.122905	0.011111	0.25	0.494444	0.738889	1	0.016667	0.194444	0.394444	0.688889	0.977778	0.005556	0.283333	0.533333	0.788889	0.966667	0.383333	0.283333	0.333333	0.094972	0.050279	0.01676	0.005556	0.116667	0.466667	0.727778	1	0.083333	0.211111	0.516667	0.866667	0.972222	0.088889	0.394444	0.588889	0.766667	0.911111	0.427778	0.435754	0.083333	0.283333	0.544444	0.761111	0.977778	0.283333
0.387234	0.306383	0.306383	0.260684	0.269231	0.153846	0.012766	0.26383	0.519149	0.748936	0.982979	0.008511	0.246809	0.382979	0.723404	1	0.004255	0.174468	0.53617	0.761702	0.991489	0.540426	0.148936	0.310638	0.094017	0.068376	0	0.004255	0.259574	0.404255	0.73617	1	0.012766	0.06383	0.531915	0.757447	0.987234	0.089362	0.187234	0.578723	0.795745	0.957447	0.519149	0.358974	0.017021	0.319149	0.502128	0.753191	0.991489	0.32766
0.333913	0.422609	0.243478	0.25784	0.160279	0.210801	0.003478	0.24	0.45913	0.72	0.998261	0.02087	0.290435	0.516522	0.77913	1	0.001739	0.215652	0.493913	0.713043	0.982609	0.593043	0.102609	0.304348	0.04878	0.04878	0.003484	0.001739	0.351304	0.535652	0.787826	1	0.113043	0.584348	0.65913	0.758261	0.866087	0.008696	0.092174	0.215652	0.615652	0.996522	0.427826	0.379791	0.012174	0.226087	0.594783	0.782609	0.982609	0.426087
0.339506	0.391975	0.268519	0.250774	0.216718	0.195046	0.018519	0.271605	0.496914	0.805556	1	0.006173	0.274691	0.509259	0.679012	0.990741	0.003086	0.197531	0.475309	0.765432	0.996914	0.540123	0.179012	0.280864	0.065015	0.058824	0.009288	0.003086	0.290123	0.537037	0.694444	1	0.074074	0.138889	0.70679	0.817901	0.938272	0.037037	0.231481	0.354938	0.641975	0.978395	0.453704	0.408669	0.012346	0.231481	0.469136	0.712963	0.941358	0.459877
0.39759	0.361446	0.240964	0.304878	0.170732	0.231707	0.048193	0.253012	0.506024	0.710843	1	0.024096	0.180723	0.421687	0.662651	0.987952	0.012048	0.301205	0.481928	0.795181	0.975904	0.554217	0.120482	0.325301	0.073171	0.04878	0	0.012048	0.13253	0.373494	0.626506	1	0.180723	0.192771	0.313253	0.337349	0.566265	0.39759	0.457831	0.722892	0.807229	0.891566	0.349398	0.365854	0.192771	0.39759	0.566265	0.795181	0.927711	0.385542
0.334928	0.365231	0.299841	0.209265	0.20607	0.196486	0.025518	0.259968	0.539075	0.755981	0.998405	0.00319	0.14992	0.425837	0.757576	0.99681	0.001595	0.339713	0.507177	0.716108	1	0.424242	0.132376	0.443381	0.043131	0.091054	0.004792	0.001595	0.204147	0.460925	0.744817	1	0.271132	0.475279	0.633174	0.77512	0.856459	0.004785	0.244019	0.454545	0.748006	0.984051	0.494418	0.341853	0.015949	0.339713	0.518341	0.720893	0.99681	0.398724
0.306159	0.519928	0.173913	0.255898	0.098004	0.179673	0.005435	0.213768	0.568841	0.894928	1	0.003623	0.32971	0.512681	0.679348	0.998188	0.001812	0.188406	0.356884	0.67029	0.869565	0.748188	0.067029	0.184783	0.029038	0.043557	0	0.001812	0.311594	0.498188	0.684783	1	0.012681	0.134058	0.197464	0.230072	0.873188	0.028986	0.257246	0.802536	0.858696	0.994565	0.375	0.290381	0.007246	0.175725	0.396739	0.686594	0.994565	0.54529
0.405714	0.434286	0.16	0.270115	0.086207	0.143678	0.022857	0.217143	0.451429	0.651429	0.977143	0.011429	0.285714	0.491429	0.805714	0.988571	0.005714	0.148571	0.657143	0.788571	1	0.782857	0.04	0.177143	0.034483	0.068966	0	0.005714	0.274286	0.474286	0.748571	1	0.034286	0.034286	0.045714	0.782857	0.794286	0.137143	0.194286	0.662857	0.708571	0.948571	0.257143	0.275862	0.028571	0.228571	0.662857	0.805714	0.965714	0.422857
0.38756	0.296651	0.315789	0.197115	0.235577	0.201923	0.014354	0.239234	0.449761	0.717703	0.995215	0.009569	0.167464	0.511962	0.77512	1	0.004785	0.311005	0.516746	0.746411	0.980861	0.45933	0.15311	0.38756	0.057692	0.067308	0.019231	0.004785	0.148325	0.521531	0.755981	1	0.210526	0.473684	0.607656	0.942584	0.980861	0.038278	0.30622	0.416268	0.712919	0.913876	0.492823	0.432692	0.019139	0.334928	0.502392	0.727273	0.980861	0.301435
0.312925	0.459184	0.227891	0.208191	0.116041	0.201365	0.047619	0.241497	0.452381	0.591837	1	0.006803	0.238095	0.588435	0.772109	0.993197	0.003401	0.302721	0.482993	0.789116	0.996599	0.721088	0.108844	0.170068	0.037543	0.030717	0.003413	0.003401	0.261905	0.578231	0.758503	1	0.064626	0.340136	0.387755	0.428571	0.482993	0.122449	0.159864	0.520408	0.887755	0.952381	0.411565	0.279863	0.010204	0.183673	0.656463	0.836735	0.986395	0.506803
0.433566	0.272727	0.293706	0.221053	0.22807	0.192982	0.020979	0.318182	0.552448	0.786713	0.98951	0.006993	0.206294	0.409091	0.667832	0.996503	0.003497	0.234266	0.458042	0.723776	1	0.325175	0.048951	0.625874	0.021053	0.105263	0.007018	0.003497	0.20979	0.318182	0.583916	1	0.01049	0.045455	0.27972	0.912587	0.926573	0.020979	0.36014	0.56993	0.783217	0.98951	0.409091	0.42807	0.01049	0.255245	0.51049	0.755245	0.972028	0.304196
0.304286	0.492857	0.202857	0.263233	0.134478	0.180258	0.005714	0.288571	0.558571	0.781429	0.998571	0.004286	0.21	0.381429	0.618571	0.994286	0.001429	0.39	0.68	0.827143	1	0.728571	0.065714	0.205714	0.02289	0.048641	0.005722	0.001429	0.181429	0.364286	0.545714	1	0.651429	0.724286	0.812857	0.872857	0.924286	0.554286	0.634286	0.744286	0.911429	0.995714	0.277143	0.228898	0.002857	0.63	0.74	0.864286	0.995714	0.471429
0.343186	0.35468	0.302135	0.228618	0.182566	0.213816	0.003284	0.293924	0.505747	0.758621	0.998358	0.006568	0.211823	0.490969	0.766831	1	0.001642	0.256158	0.495895	0.727422	0.981938	0.446634	0.134647	0.418719	0.049342	0.085526	0.006579	0.001642	0.238095	0.472906	0.719212	1	0.027915	0.229885	0.422003	0.661741	0.954023	0.050903	0.249589	0.536946	0.809524	0.986864	0.500821	0.345395	0.013136	0.226601	0.464696	0.701149	0.934319	0.357964
0.412969	0.290102	0.296928	0.219178	0.267123	0.174658	0.010239	0.283276	0.542662	0.819113	0.989761	0.006826	0.276451	0.508532	0.672355	1	0.003413	0.1843	0.40273	0.679181	0.993174	0.518771	0.1843	0.296928	0.061644	0.054795	0	0.003413	0.34471	0.713311	0.843003	1	0.03413	0.197952	0.273038	0.52901	0.703072	0.09215	0.16041	0.416382	0.491468	0.921502	0.457338	0.390411	0.017065	0.194539	0.423208	0.610922	0.952218	0.317406
0.360406	0.390863	0.248731	0.260204	0.188776	0.183673	0.045685	0.203046	0.451777	0.695431	0.989848	0.010152	0.258883	0.57868	0.791878	1	0.005076	0.213198	0.441624	0.639594	0.984772	0.598985	0.182741	0.218274	0.061224	0.040816	0	0.005076	0.269036	0.634518	0.80203	1	0.025381	0.441624	0.527919	0.675127	0.908629	0.096447	0.142132	0.19797	0.416244	0.614213	0.360406	0.326531	0.040609	0.35533	0.538071	0.86802	0.984772	0.390863
0.328829	0.405405	0.265766	0.289593	0.199095	0.180995	0.009009	0.202703	0.382883	0.693694	0.995495	0.045045	0.333333	0.536036	0.765766	0.990991	0.004505	0.13964	0.513514	0.734234	1	0.445946	0.211712	0.342342	0.095023	0.085973	0.004525	0.004505	0.333333	0.603604	0.837838	1	0.009009	0.162162	0.414414	0.612613	0.936937	0.040541	0.243243	0.328829	0.689189	0.986486	0.364865	0.41629	0.013514	0.198198	0.445946	0.68018	0.986486	0.423423
0.31441	0.366812	0.318777	0.236842	0.22807	0.232456	0.0131	0.257642	0.49345	0.733624	0.995633	0.004367	0.209607	0.406114	0.71179	0.982533	0.034934	0.28821	0.576419	0.772926	1	0.349345	0.017467	0.633188	0.008772	0.078947	0	0.004367	0.087336	0.454148	0.855895	1	0.41048	0.41048	0.414847	0.419214	0.423581	0.091703	0.28821	0.532751	0.703057	0.991266	0.49345	0.473684	0.017467	0.222707	0.471616	0.694323	0.9869	0.406114
0.331126	0.377483	0.291391	0.229236	0.229236	0.196013	0.013245	0.235099	0.47351	0.738411	0.996689	0.006623	0.261589	0.536424	0.811258	0.986755	0.003311	0.241722	0.460265	0.675497	1	0.453642	0.162252	0.384106	0.046512	0.07309	0	0.003311	0.258278	0.509934	0.837748	1	0.122517	0.274834	0.354305	0.562914	0.649007	0.033113	0.241722	0.486755	0.761589	0.903974	0.559603	0.41196	0.019868	0.231788	0.470199	0.705298	0.986755	0.427152
0.431193	0.238532	0.330275	0.222222	0.296296	0.148148	0.027523	0.229358	0.486239	0.688073	0.981651	0.018349	0.238532	0.412844	0.724771	0.990826	0.009174	0.211009	0.495413	0.788991	1	0.449541	0.311927	0.238532	0.12963	0.055556	0	0.009174	0.238532	0.59633	0.834862	1	0.256881	0.495413	0.614679	0.779817	0.963303	0.055046	0.155963	0.220183	0.394495	0.458716	0.440367	0.388889	0.055046	0.211009	0.495413	0.816514	0.963303	0.256881
0.396914	0.237027	0.366059	0.179775	0.327247	0.174157	0.008415	0.26648	0.527349	0.771388	1	0.00561	0.246844	0.486676	0.704067	0.997195	0.001403	0.232819	0.472651	0.740533	0.998597	0.460028	0.225806	0.314165	0.095506	0.064607	0.002809	0.001403	0.210379	0.436185	0.750351	1	0.044881	0.151473	0.420757	0.837307	0.976157	0.007013	0.342216	0.565217	0.726508	0.997195	0.59467	0.41573	0.004208	0.255259	0.486676	0.741935	0.997195	0.237027
0.422727	0.270455	0.306818	0.223235	0.275626	0.159453	0.006818	0.234091	0.468182	0.747727	1	0.009091	0.236364	0.440909	0.684091	0.993182	0.002273	0.293182	0.577273	0.781818	0.990909	0.395455	0.095455	0.509091	0.029613	0.111617	0.020501	0.002273	0.236364	0.434091	0.684091	1	0.084091	0.231818	0.695455	0.745455	0.940909	0.011364	0.25	0.504545	0.772727	0.988636	0.459091	0.451025	0.009091	0.293182	0.586364	0.772727	0.990909	0.281818
0.31069	0.486637	0.202673	0.270903	0.136009	0.16165	0.002227	0.202673	0.435412	0.667038	1	0.003341	0.357461	0.64922	0.835189	0.998886	0.001114	0.167038	0.309577	0.514477	0.994432	0.683742	0.08686	0.229399	0.037904	0.037904	0.00223	0.001114	0.387528	0.636971	0.827394	1	0.005568	0.115813	0.188196	0.492205	0.875278	0.02784	0.150334	0.280624	0.430958	0.654788	0.518931	0.309922	0.004454	0.262806	0.514477	0.761693	0.998886	0.466592
0.444142	0.299728	0.256131	0.262295	0.243169	0.136612	0.010899	0.26703	0.550409	0.760218	1	0.00545	0.188011	0.373297	0.629428	0.997275	0.002725	0.3297	0.561308	0.752044	0.989101	0.509537	0.177112	0.313351	0.062842	0.07377	0.002732	0.002725	0.182561	0.362398	0.634877	1	0.029973	0.313351	0.517711	0.790191	0.904632	0.024523	0.46594	0.648501	0.861035	0.991826	0.370572	0.31694	0.016349	0.155313	0.476839	0.73297	0.989101	0.356948
0.313953	0.313123	0.372924	0.203658	0.226933	0.237739	0.003322	0.215116	0.497508	0.769103	0.999169	0.001661	0.288206	0.503322	0.753322	1	0.000831	0.240033	0.486711	0.740864	0.998339	0.297342	0.017442	0.685216	0.009144	0.103907	0.002494	0.000831	0.320598	0.581395	0.789867	1	0.408638	0.608804	0.83804	0.973422	0.997508	0.002492	0.213455	0.464286	0.726744	0.9701	0.604651	0.36409	0.002492	0.262458	0.475914	0.723422	0.998339	0.354651
0.367704	0.340467	0.291829	0.231969	0.208577	0.208577	0.007782	0.252918	0.501946	0.774319	0.992218	0.005837	0.214008	0.470817	0.710117	0.998054	0.001946	0.270428	0.519455	0.7393	1	0.439689	0.16537	0.394942	0.05653	0.076023	0.005848	0.001946	0.138132	0.375486	0.727626	1	0.040856	0.445525	0.634241	0.787938	0.957198	0.005837	0.299611	0.540856	0.756809	0.990272	0.550584	0.335283	0.005837	0.309339	0.509728	0.752918	0.996109	0.344358
0.27707	0.463376	0.259554	0.239234	0.140351	0.23445	0.009554	0.257962	0.466561	0.66879	0.988854	0.003185	0.237261	0.574841	0.835987	1	0.001592	0.248408	0.431529	0.656051	0.995223	0.55414	0.130573	0.315287	0.047847	0.060606	0.00319	0.001592	0.261146	0.625796	0.861465	1	0.133758	0.351911	0.487261	0.627389	0.708599	0.003185	0.205414	0.401274	0.600318	0.769108	0.558917	0.341308	0.003185	0.278662	0.506369	0.737261	0.996815	0.484076
0.37218	0.342105	0.285714	0.279245	0.2	0.166038	0.007519	0.259398	0.578947	0.808271	1	0.018797	0.236842	0.466165	0.770677	0.992481	0.003759	0.203008	0.443609	0.62406	0.921053	0.296992	0.097744	0.605263	0.033962	0.09434	0.003774	0.003759	0.146617	0.575188	0.857143	1	0.112782	0.669173	0.710526	0.733083	0.766917	0.018797	0.225564	0.43985	0.620301	0.928571	0.43985	0.316981	0.011278	0.191729	0.413534	0.590226	0.921053	0.345865
0.322917	0.291667	0.385417	0.147368	0.263158	0.252632	0.083333	0.229167	0.4375	0.875	1	0.041667	0.28125	0.552083	0.760417	0.947917	0.010417	0.177083	0.395833	0.645833	0.9375	0.28125	0.4375	0.28125	0.115789	0.073684	0.010526	0.010417	0.21875	0.520833	0.760417	1	0.145833	0.260417	0.427083	0.614583	0.75	0.03125	0.083333	0.822917	0.895833	0.96875	0.489583	0.4	0.03125	0.260417	0.447917	0.677083	0.9375	0.322917
0.371698	0.398113	0.230189	0.272899	0.15864	0.169027	0.003774	0.185849	0.551887	0.791509	1	0.007547	0.281132	0.44717	0.699057	0.99717	0.000943	0.279245	0.523585	0.754717	0.998113	0.674528	0.075472	0.25	0.036827	0.051936	0.002833	0.000943	0.239623	0.435849	0.685849	1	0.204717	0.50566	0.59717	0.733962	0.968868	0.00566	0.128302	0.662264	0.816981	0.993396	0.39717	0.381492	0.00566	0.285849	0.479245	0.703774	0.998113	0.4
0.360444	0.391867	0.247689	0.261111	0.164815	0.216667	0.018484	0.232902	0.513863	0.735675	0.998152	0.003697	0.292052	0.504621	0.772643	0.994455	0.001848	0.195933	0.438078	0.720887	1	0.735675	0.110906	0.15342	0.064815	0.05	0.001852	0.001848	0.266174	0.48244	0.744917	1	0.005545	0.19963	0.608133	0.669131	0.863216	0.018484	0.12939	0.550832	0.946396	0.990758	0.380776	0.396296	0.007394	0.25878	0.55268	0.783734	0.992606	0.414048
0.369942	0.312139	0.317919	0.215116	0.255814	0.180233	0.011561	0.300578	0.50289	0.82659	1	0.040462	0.231214	0.543353	0.734104	0.99422	0.00578	0.202312	0.433526	0.66474	0.965318	0.34104	0.265896	0.393064	0.110465	0.063953	0.005814	0.00578	0.127168	0.491329	0.682081	1	0.011561	0.208092	0.526012	0.751445	0.83815	0.144509	0.306358	0.404624	0.861272	0.988439	0.358382	0.453488	0.017341	0.179191	0.479769	0.67052	0.965318	0.34104
0.341463	0.382114	0.276423	0.278689	0.196721	0.245902	0.01626	0.195122	0.504065	0.699187	0.99187	0.02439	0.211382	0.479675	0.731707	0.97561	0.00813	0.276423	0.487805	0.756098	1	0.349593	0.219512	0.430894	0.081967	0.065574	0	0.00813	0.211382	0.414634	0.756098	1	0.252033	0.292683	0.373984	0.463415	0.853659	0.065041	0.162602	0.609756	0.715447	0.95935	0.447154	0.278689	0.121951	0.300813	0.471545	0.788618	0.98374	0.382114
0.359813	0.323988	0.316199	0.196568	0.23869	0.234009	0.012461	0.260125	0.503115	0.757009	1	0.003115	0.228972	0.479751	0.719626	0.990654	0.001558	0.249221	0.520249	0.761682	0.996885	0.362928	0.267913	0.369159	0.115445	0.059282	0.00936	0.001558	0.23676	0.450156	0.735202	1	0.004673	0.26947	0.556075	0.752336	0.965732	0.031153	0.23053	0.484424	0.761682	0.985981	0.593458	0.358814	0.003115	0.283489	0.512461	0.744548	0.996885	0.338006
0.273305	0.364407	0.362288	0.218684	0.176221	0.239915	0.008475	0.298729	0.548729	0.788136	0.993644	0.004237	0.209746	0.442797	0.733051	0.987288	0.002119	0.271186	0.485169	0.709746	1	0.423729	0.184322	0.391949	0.055202	0.089172	0.008493	0.002119	0.15678	0.42161	0.745763	1	0.129237	0.383475	0.612288	0.786017	0.949153	0.004237	0.275424	0.514831	0.735169	0.987288	0.567797	0.369427	0.010593	0.307203	0.5	0.756356	0.995763	0.375
0.382306	0.407583	0.210111	0.292722	0.155063	0.137658	0.004739	0.230648	0.516588	0.763033	1	0.00316	0.268562	0.616114	0.800948	0.993681	0.00158	0.200632	0.377567	0.537125	0.99842	0.608215	0.148499	0.243286	0.064873	0.049051	0.001582	0.00158	0.315956	0.687204	0.838863	1	0.017378	0.314376	0.437599	0.546603	0.987362	0.020537	0.120063	0.28594	0.527646	0.679305	0.513428	0.357595	0.007899	0.327014	0.593997	0.778831	0.992101	0.399684
0.262664	0.476548	0.260788	0.214286	0.148496	0.236842	0.030019	0.249531	0.439024	0.727955	1	0.007505	0.26454	0.534709	0.78424	0.998124	0.001876	0.213884	0.500938	0.724203	0.994371	0.686679	0.166979	0.146341	0.067669	0.037594	0.003759	0.001876	0.275797	0.553471	0.804878	1	0.015009	0.238274	0.377111	0.690432	0.981238	0.016886	0.195122	0.341463	0.716698	0.834897	0.484053	0.368421	0.009381	0.358349	0.641651	0.827392	0.994371	0.45591
0.368664	0.308756	0.322581	0.203233	0.272517	0.191686	0.006912	0.271889	0.493088	0.760369	0.997696	0.013825	0.248848	0.5	0.74424	1	0.002304	0.214286	0.506912	0.725806	0.993088	0.357143	0.103687	0.539171	0.046189	0.110855	0.004619	0.002304	0.223502	0.389401	0.695853	1	0.009217	0.138249	0.262673	0.292627	0.421659	0.025346	0.43318	0.624424	0.801843	0.995392	0.573733	0.457275	0.009217	0.232719	0.456221	0.691244	0.993088	0.327189
0.401575	0.23622	0.362205	0.198413	0.373016	0.142857	0.047244	0.267717	0.551181	0.748031	0.968504	0.015748	0.125984	0.519685	0.811024	1	0.007874	0.212598	0.425197	0.677165	0.976378	0.464567	0.496063	0.03937	0.15873	0.031746	0	0.007874	0.346457	0.614173	0.818898	1	0.015748	0.165354	0.362205	0.590551	0.905512	0.850394	0.850394	0.858268	0.866142	0.968504	0.354331	0.460317	0.015748	0.19685	0.409449	0.606299	0.976378	0.23622
0.282451	0.390447	0.327103	0.205821	0.199584	0.279626	0.002077	0.224299	0.476636	0.739356	0.997923	0.003115	0.283489	0.537902	0.779855	1	0.001038	0.253375	0.477674	0.724818	0.998962	0.47352	0.166147	0.360332	0.076923	0.087318	0.008316	0.001038	0.279335	0.556594	0.760125	1	0.022845	0.274143	0.507788	0.773624	0.976116	0.010384	0.226376	0.418484	0.701973	0.997923	0.615784	0.365904	0.003115	0.262721	0.477674	0.751817	0.998962	0.407061
0.342857	0.409524	0.247619	0.259615	0.163462	0.192308	0.019048	0.180952	0.409524	0.628571	0.990476	0.028571	0.228571	0.485714	0.761905	1	0.009524	0.285714	0.561905	0.771429	0.961905	0.485714	0.047619	0.466667	0.038462	0.115385	0	0.009524	0.2	0.4	0.847619	1	0.295238	0.295238	0.304762	0.942857	0.961905	0.038095	0.257143	0.542857	0.714286	0.838095	0.361905	0.307692	0.057143	0.371429	0.714286	0.8	0.961905	0.361905
0.28022	0.406593	0.313187	0.21547	0.198895	0.270718	0.06044	0.247253	0.5	0.791209	1	0.010989	0.258242	0.538462	0.703297	0.967033	0.005495	0.164835	0.428571	0.774725	0.994505	0.554945	0.417582	0.027473	0.127072	0.005525	0.005525	0.005495	0.357143	0.604396	0.741758	1	0.027473	0.17033	0.340659	0.824176	0.994505	0.428571	0.428571	0.434066	0.43956	0.450549	0.576923	0.364641	0.016484	0.21978	0.527473	0.747253	0.994505	0.368132
0.365546	0.323529	0.310924	0.227848	0.223629	0.244726	0.008403	0.210084	0.462185	0.773109	1	0.021008	0.260504	0.487395	0.747899	0.991597	0.004202	0.252101	0.508403	0.722689	0.987395	0.420168	0.168067	0.411765	0.075949	0.059072	0	0.004202	0.344538	0.554622	0.710084	1	0.205882	0.352941	0.453782	0.647059	0.739496	0.029412	0.12605	0.466387	0.815126	0.983193	0.470588	0.455696	0.029412	0.285714	0.512605	0.714286	0.966387	0.323529
0.397436	0.337607	0.264957	0.23176	0.227468	0.188841	0.008547	0.188034	0.397436	0.688034	1	0.025641	0.264957	0.504274	0.730769	0.974359	0.004274	0.350427	0.559829	0.777778	0.995726	0.495726	0.179487	0.324786	0.072961	0.081545	0.012876	0.004274	0.136752	0.273504	0.623932	1	0.247863	0.41453	0.478632	0.666667	0.747863	0.111111	0.512821	0.769231	0.884615	0.995726	0.440171	0.377682	0.017094	0.435897	0.645299	0.777778	0.991453	0.337607
0.358951	0.390597	0.250452	0.236199	0.175566	0.230769	0.002712	0.246835	0.462929	0.744123	1	0.001808	0.174503	0.487342	0.737794	0.997288	0.000904	0.371609	0.566908	0.761302	0.998192	0.762206	0.090416	0.147378	0.049774	0.037104	0.000905	0.000904	0.243219	0.483725	0.697107	1	0.022604	0.367089	0.504521	0.820976	0.96745	0.001808	0.216998	0.839964	0.906872	0.983725	0.356239	0.428959	0.003617	0.138336	0.474684	0.771248	0.995479	0.468354
0.316327	0.346939	0.336735	0.220513	0.25641	0.261538	0.010204	0.209184	0.479592	0.688776	1	0.015306	0.229592	0.52551	0.80102	0.994898	0.005102	0.285714	0.484694	0.714286	0.933673	0.413265	0.469388	0.117347	0.123077	0.041026	0	0.005102	0.30102	0.591837	0.831633	1	0.015306	0.321429	0.489796	0.673469	0.928571	0.112245	0.132653	0.265306	0.295918	0.979592	0.44898	0.492308	0.020408	0.270408	0.479592	0.719388	0.933673	0.331633
0.506369	0.288217	0.205414	0.299841	0.236045	0.118022	0.006369	0.246815	0.549363	0.765924	0.998408	0.003185	0.227707	0.452229	0.66879	0.992038	0.001592	0.261146	0.480892	0.742038	1	0.568471	0.082803	0.348726	0.031898	0.095694	0.00319	0.001592	0.187898	0.47293	0.753185	1	0.052548	0.237261	0.414013	0.468153	0.882166	0.020701	0.363057	0.578025	0.780255	0.984076	0.294586	0.299841	0.007962	0.270701	0.444268	0.652866	0.980892	0.363057
0.374707	0.351288	0.274005	0.269953	0.206573	0.185446	0.009368	0.229508	0.437939	0.735363	1	0.004684	0.177986	0.496487	0.744731	0.985948	0.002342	0.35363	0.550351	0.747073	0.995316	0.461358	0.133489	0.405152	0.061033	0.075117	0.004695	0.002342	0.154567	0.468384	0.723653	1	0.051522	0.447307	0.5363	0.704918	0.995316	0.01171	0.257611	0.480094	0.800937	0.960187	0.470726	0.328638	0.01171	0.344262	0.543326	0.737705	0.995316	0.381733
0.417476	0.38835	0.194175	0.343137	0.147059	0.156863	0.048544	0.203883	0.436893	0.699029	0.980583	0.019417	0.271845	0.485437	0.796117	1	0.009709	0.320388	0.582524	0.728155	0.941748	0.223301	0.009709	0.76699	0.019608	0.058824	0	0.009709	0.048544	0.106796	0.718447	1	0.737864	0.737864	0.737864	0.737864	0.737864	0.126214	0.300971	0.524272	0.786408	0.980583	0.262136	0.392157	0.126214	0.359223	0.572816	0.68932	0.951456	0.436893
0.319088	0.413105	0.267806	0.205714	0.182857	0.222857	0.017094	0.299145	0.501425	0.672365	0.980057	0.005698	0.262108	0.509972	0.792023	0.991453	0.002849	0.19943	0.444444	0.698006	1	0.723647	0.193732	0.082621	0.085714	0.034286	0.005714	0.002849	0.296296	0.561254	0.777778	1	0.079772	0.148148	0.267806	0.358974	0.917379	0.008547	0.45584	0.481481	0.940171	0.962963	0.452991	0.308571	0.014245	0.239316	0.501425	0.774929	0.982906	0.421652
0.358491	0.320755	0.320755	0.115385	0.288462	0.230769	0.056604	0.150943	0.54717	0.773585	1	0.037736	0.207547	0.396226	0.490566	0.90566	0.018868	0.320755	0.528302	0.735849	0.981132	0.566038	0.075472	0.358491	0.076923	0.076923	0	0.018868	0.132075	0.283019	0.471698	1	0.320755	0.320755	0.339623	0.358491	0.962264	0.490566	0.54717	0.679245	0.773585	0.867925	0.320755	0.346154	0.320755	0.509434	0.622642	0.735849	0.924528	0.320755
0.3125	0.375	0.3125	0.264151	0.201258	0.220126	0.0375	0.21875	0.41875	0.675	0.95625	0.05	0.28125	0.525	0.775	1	0.00625	0.1875	0.5	0.725	0.975	0.35625	0.29375	0.35	0.125786	0.062893	0.012579	0.00625	0.14375	0.5375	0.7375	1	0.0125	0.225	0.56875	0.8125	0.90625	0.05625	0.30625	0.39375	0.6125	0.95	0.375	0.465409	0.01875	0.19375	0.49375	0.7125	0.98125	0.375
0.364379	0.349673	0.285948	0.216039	0.198036	0.225859	0.009804	0.19281	0.45098	0.727124	1	0.006536	0.267974	0.485294	0.735294	0.998366	0.001634	0.346405	0.54902	0.767974	0.99183	0.612745	0.199346	0.187908	0.086743	0.040917	0.008183	0.001634	0.230392	0.455882	0.699346	1	0.003268	0.220588	0.53268	0.76634	0.978758	0.062092	0.401961	0.573529	0.79085	0.955882	0.485294	0.356792	0.004902	0.218954	0.441176	0.736928	0.986928	0.362745
0.393665	0.321267	0.285068	0.222727	0.245455	0.195455	0.022624	0.244344	0.556561	0.846154	1	0.00905	0.180995	0.506787	0.733032	0.963801	0.004525	0.230769	0.41629	0.647059	0.927602	0.443439	0.334842	0.221719	0.113636	0.068182	0.013636	0.004525	0.262443	0.61991	0.81448	1	0.036199	0.312217	0.447964	0.588235	0.923077	0.013575	0.095023	0.244344	0.850679	0.963801	0.384615	0.4	0.0181	0.235294	0.41629	0.624434	0.923077	0.366516
0.411871	0.284173	0.303957	0.221622	0.23964	0.207207	0.005396	0.223022	0.496403	0.766187	0.998201	0.003597	0.241007	0.46223	0.701439	0.98741	0.001799	0.294964	0.53777	0.76259	1	0.406475	0.393885	0.19964	0.115315	0.054054	0.018018	0.001799	0.266187	0.541367	0.758993	1	0.064748	0.258993	0.526978	0.723022	0.944245	0.02518	0.192446	0.359712	0.667266	0.996403	0.440647	0.392793	0.007194	0.26259	0.48741	0.72482	0.992806	0.30036
0.47166	0.42915	0.09919	0.509128	0.103448	0.048682	0.006073	0.287449	0.550607	0.755061	0.997976	0.004049	0.279352	0.520243	0.787449	1	0.002024	0.078947	0.216599	0.309717	0.919028	0.789474	0.115385	0.095142	0.044625	0.024341	0	0.002024	0.38664	0.58502	0.793522	1	0.006073	0.078947	0.214575	0.291498	0.62753	0.030364	0.091093	0.240891	0.311741	0.84413	0.157895	0.154158	0.008097	0.080972	0.216599	0.275304	0.821862	0.431174
0.3	0.413333	0.286667	0.22964	0.192256	0.221629	0.005333	0.250667	0.510667	0.78	0.998667	0.006667	0.228	0.530667	0.721333	0.997333	0.001333	0.265333	0.445333	0.753333	1	0.632	0.184	0.184	0.093458	0.058745	0.00534	0.001333	0.221333	0.528	0.730667	1	0.004	0.297333	0.446667	0.797333	0.985333	0.033333	0.286667	0.458667	0.816	0.981333	0.550667	0.368491	0.012	0.313333	0.550667	0.748	0.996	0.442667
0.416321	0.35408	0.229599	0.288089	0.16482	0.160665	0.004149	0.300138	0.634855	0.807746	1	0.002766	0.271093	0.504841	0.767635	0.998617	0.001383	0.164592	0.334716	0.507607	0.917012	0.550484	0.230982	0.218534	0.087258	0.054017	0.006925	0.001383	0.305671	0.608575	0.771784	1	0.006916	0.142462	0.297372	0.475795	0.781466	0.062241	0.405256	0.626556	0.816044	0.97787	0.385892	0.33518	0.006916	0.193638	0.355463	0.539419	0.917012	0.39834
0.257692	0.498077	0.244231	0.22158	0.132948	0.204239	0.021154	0.280769	0.488462	0.676923	0.994231	0.003846	0.201923	0.492308	0.767308	1	0.001923	0.284615	0.513462	0.775	0.998077	0.675	0.130769	0.194231	0.05395	0.026975	0.011561	0.001923	0.213462	0.582692	0.763462	1	0.007692	0.321154	0.455769	0.901923	0.996154	0.063462	0.236538	0.373077	0.544231	0.990385	0.551923	0.308285	0.005769	0.278846	0.525	0.705769	0.998077	0.526923
0.388805	0.376702	0.234493	0.268182	0.183333	0.178788	0.007564	0.310136	0.518911	0.7882	0.998487	0.003026	0.183056	0.453858	0.738275	1	0.001513	0.26475	0.481089	0.70348	0.966717	0.540091	0.161876	0.298033	0.065152	0.062121	0.001515	0.001513	0.217852	0.523449	0.742814	1	0.102874	0.234493	0.376702	0.487141	0.92587	0.013616	0.325265	0.608169	0.898638	0.995461	0.490166	0.306061	0.019667	0.313162	0.596067	0.768533	0.971256	0.379728
0.366972	0.385321	0.247706	0.268519	0.194444	0.185185	0.027523	0.183486	0.449541	0.743119	0.981651	0.018349	0.357798	0.550459	0.733945	1	0.009174	0.174312	0.348624	0.678899	0.972477	0.201835	0	0.798165	0	0.055556	0	0.009174	0.412844	0.66055	0.706422	1	0	0	0	0	0	0.045872	0.229358	0.477064	0.752294	0.954128	0.321101	0.444444	0.055046	0.284404	0.522936	0.678899	0.926606	0.366972
0.343949	0.343949	0.312102	0.307692	0.198718	0.230769	0.012739	0.235669	0.477707	0.738854	1	0.076433	0.242038	0.452229	0.719745	0.993631	0.006369	0.184713	0.535032	0.726115	0.961783	0.630573	0.165605	0.203822	0.057692	0.044872	0.019231	0.006369	0.191083	0.350318	0.617834	1	0.019108	0.490446	0.764331	0.821656	0.974522	0.044586	0.541401	0.66242	0.88535	0.936306	0.414013	0.410256	0.019108	0.261146	0.414013	0.707006	0.968153	0.369427
0.299258	0.459604	0.241138	0.276289	0.12701	0.23134	0.001649	0.273289	0.622836	0.805853	0.999588	0.000824	0.248557	0.471558	0.702391	1	0.000412	0.234542	0.459604	0.686727	0.998763	0.73413	0.064303	0.201566	0.036289	0.065979	0.002474	0.000412	0.210635	0.402721	0.681781	1	0.037923	0.560594	0.607997	0.677659	0.998763	0.002061	0.430338	0.736191	0.838829	0.981451	0.363561	0.256495	0.002061	0.334295	0.435697	0.642209	0.998763	0.472795
0.394444	0.298148	0.307407	0.250464	0.261596	0.165121	0.003704	0.233333	0.501852	0.737037	0.998148	0.009259	0.322222	0.572222	0.848148	0.987037	0.001852	0.212963	0.438889	0.644444	1	0.405556	0.207407	0.387037	0.064935	0.068646	0.001855	0.001852	0.314815	0.590741	0.881481	1	0.094444	0.27963	0.374074	0.52963	0.944444	0.012963	0.216667	0.507407	0.709259	0.848148	0.446296	0.378479	0.009259	0.27037	0.464815	0.644444	0.994444	0.346296
0.467005	0.294416	0.238579	0.244275	0.193384	0.157761	0.007614	0.203046	0.406091	0.695431	0.992386	0.020305	0.256345	0.525381	0.779188	0.984772	0.002538	0.393401	0.604061	0.77665	1	0.5	0.203046	0.296954	0.061069	0.066158	0.005089	0.002538	0.182741	0.43401	0.72335	1	0.007614	0.634518	0.738579	0.878173	0.964467	0.111675	0.27665	0.370558	0.527919	0.984772	0.393401	0.26972	0.010152	0.48731	0.659898	0.819797	0.977157	0.347716
0.394209	0.242762	0.363029	0.165179	0.319196	0.133929	0.01559	0.233853	0.523385	0.752784	1	0.011136	0.249443	0.438753	0.76392	0.982183	0.002227	0.23608	0.483296	0.732739	0.997773	0.405345	0.2049	0.389755	0.075893	0.080357	0.004464	0.002227	0.300668	0.530067	0.792873	1	0.004454	0.262806	0.496659	0.777283	0.971047	0.013363	0.198218	0.432071	0.706013	0.995546	0.554566	0.410714	0.004454	0.273942	0.481069	0.717149	0.997773	0.253898
0.344942	0.33665	0.318408	0.242525	0.232558	0.200997	0.021559	0.271973	0.474295	0.752902	0.996683	0.004975	0.189055	0.45937	0.721393	1	0.001658	0.283582	0.560531	0.78607	0.998342	0.532338	0.140962	0.3267	0.053156	0.066445	0.006645	0.001658	0.15257	0.344942	0.648425	1	0.238806	0.504146	0.681592	0.817579	0.961857	0.013267	0.361526	0.595357	0.792703	0.995025	0.547264	0.352159	0.00995	0.320066	0.533997	0.756219	0.993367	0.353234
0.307359	0.385281	0.307359	0.234783	0.213043	0.226087	0.008658	0.268398	0.493506	0.722944	1	0.012987	0.21645	0.47619	0.800866	0.987013	0.004329	0.229437	0.489177	0.69697	0.995671	0.337662	0.095238	0.5671	0.034783	0.104348	0	0.004329	0.116883	0.406926	0.692641	1	0.398268	0.78355	0.835498	0.857143	0.891775	0.051948	0.272727	0.467532	0.614719	0.978355	0.493506	0.330435	0.025974	0.21645	0.47619	0.688312	0.991342	0.385281
0.477477	0.189189	0.333333	0.2	0.327273	0.127273	0.018018	0.279279	0.54955	0.783784	0.981982	0.027027	0.18018	0.333333	0.45045	0.972973	0.009009	0.252252	0.504505	0.711712	1	0.315315	0.198198	0.486486	0.072727	0.109091	0	0.009009	0.207207	0.387387	0.657658	1	0.162162	0.225225	0.279279	0.675676	0.72973	0.054054	0.414414	0.558559	0.810811	0.963964	0.477477	0.381818	0.036036	0.342342	0.495495	0.702703	0.972973	0.18018
0.330275	0.311927	0.357798	0.203704	0.231481	0.240741	0.045872	0.330275	0.623853	0.770642	1	0.018349	0.192661	0.40367	0.587156	0.972477	0.009174	0.238532	0.440367	0.779817	0.954128	0.376147	0.256881	0.366972	0.083333	0.083333	0.027778	0.009174	0.311927	0.495413	0.87156	1	0.036697	0.091743	0.449541	0.568807	0.844037	0.146789	0.229358	0.642202	0.761468	0.954128	0.458716	0.425926	0.036697	0.211009	0.477064	0.688073	0.954128	0.321101
0.298182	0.386667	0.315152	0.228155	0.218447	0.253641	0.002424	0.254545	0.515152	0.763636	0.998788	0.004848	0.250909	0.490909	0.739394	1	0.001212	0.233939	0.484848	0.726061	0.997576	0.483636	0.233939	0.282424	0.105583	0.054612	0.003641	0.001212	0.206061	0.459394	0.738182	1	0.002424	0.254545	0.419394	0.752727	0.997576	0.006061	0.317576	0.585455	0.773333	0.991515	0.566061	0.38835	0.003636	0.266667	0.476364	0.744242	0.997576	0.412121
0.333503	0.322318	0.344179	0.20295	0.232452	0.231943	0.002034	0.23335	0.474835	0.738688	0.998475	0.001017	0.252161	0.516014	0.748856	1	0.000508	0.262837	0.513981	0.75089	0.999492	0.404677	0.149975	0.445348	0.055443	0.085961	0.003561	0.000508	0.222166	0.512456	0.759532	1	0.002542	0.316726	0.551093	0.770208	0.999492	0.005592	0.259786	0.459583	0.723945	0.930859	0.563803	0.375381	0.002542	0.279105	0.509405	0.744281	0.999492	0.341129
0.359375	0.317708	0.322917	0.230366	0.209424	0.26178	0.020833	0.244792	0.46875	0.755208	0.963542	0.010417	0.229167	0.489583	0.703125	0.989583	0.005208	0.25	0.510417	0.75	1	0.46875	0.208333	0.322917	0.109948	0.057592	0.005236	0.005208	0.317708	0.567708	0.713542	1	0.161458	0.338542	0.463542	0.755208	0.994792	0.015625	0.109375	0.307292	0.822917	0.96875	0.484375	0.460733	0.026042	0.270833	0.505208	0.734375	0.994792	0.307292
0.483221	0.278523	0.238255	0.228956	0.232323	0.141414	0.013423	0.197987	0.496644	0.761745	1	0.006711	0.248322	0.520134	0.795302	0.996644	0.003356	0.291946	0.479866	0.677852	0.939597	0.520134	0.134228	0.345638	0.047138	0.080808	0.013468	0.003356	0.157718	0.449664	0.738255	1	0.325503	0.456376	0.61745	0.674497	0.919463	0.013423	0.278523	0.503356	0.802013	0.95302	0.305369	0.296296	0.020134	0.318792	0.459732	0.66443	0.942953	0.338926
0.427184	0.271845	0.300971	0.205882	0.245098	0.127451	0.058252	0.281553	0.495146	0.737864	0.970874	0.019417	0.252427	0.553398	0.796117	0.92233	0.009709	0.194175	0.38835	0.699029	1	0.407767	0.592233	0	0.196078	0	0	0.009709	0.281553	0.543689	0.786408	1	0.019417	0.203883	0.407767	0.699029	0.990291	0	0	0	0	0	0.38835	0.509804	0.019417	0.213592	0.475728	0.708738	0.980583	0.242718
0.325758	0.337121	0.337121	0.205323	0.235741	0.250951	0.007576	0.219697	0.454545	0.738636	0.981061	0.015152	0.268939	0.537879	0.772727	0.996212	0.003788	0.231061	0.511364	0.708333	1	0.367424	0.265152	0.367424	0.076046	0.076046	0.015209	0.003788	0.284091	0.473485	0.852273	1	0.060606	0.140152	0.587121	0.753788	0.94697	0.007576	0.227273	0.435606	0.69697	0.931818	0.55303	0.460076	0.003788	0.231061	0.522727	0.723485	0.984848	0.359848
0.32439	0.346341	0.329268	0.200244	0.238095	0.234432	0.002439	0.273171	0.55122	0.787805	1	0.004878	0.218293	0.45122	0.709756	0.996341	0.00122	0.260976	0.507317	0.752439	0.99878	0.468293	0.242683	0.289024	0.107448	0.051282	0.002442	0.00122	0.210976	0.464634	0.740244	1	0.037805	0.202439	0.420732	0.80122	0.99878	0.006098	0.32439	0.541463	0.702439	0.992683	0.559756	0.398046	0.003659	0.265854	0.47439	0.74878	0.99878	0.371951
0.3216	0.4112	0.2672	0.261218	0.184295	0.185897	0.0144	0.3024	0.5488	0.7776	0.9968	0.0032	0.2128	0.48	0.7888	1	0.0016	0.2592	0.4512	0.6736	0.9808	0.5424	0.1472	0.3104	0.049679	0.072115	0.008013	0.0016	0.2048	0.5344	0.856	1	0.016	0.384	0.5472	0.6992	0.9776	0.0048	0.2304	0.432	0.6176	0.8416	0.4704	0.278846	0.0096	0.2528	0.4288	0.6368	0.984	0.432
0.395904	0.331058	0.273038	0.270548	0.226027	0.167808	0.010239	0.228669	0.484642	0.764505	1	0.006826	0.204778	0.457338	0.59727	0.989761	0.003413	0.327645	0.641638	0.819113	0.996587	0.546075	0.201365	0.25256	0.085616	0.065068	0.003425	0.003413	0.255973	0.498294	0.641638	1	0.068259	0.191126	0.242321	0.720137	0.955631	0.013652	0.416382	0.682594	0.849829	0.993174	0.409556	0.349315	0.017065	0.423208	0.607509	0.8157	0.996587	0.34471
0.453228	0.305665	0.241107	0.271768	0.224274	0.156992	0.013175	0.283267	0.474308	0.768116	0.998682	0.002635	0.26087	0.524374	0.783926	1	0.001318	0.188406	0.482213	0.699605	0.997365	0.513834	0.171278	0.314888	0.064644	0.077836	0.001319	0.001318	0.251647	0.549407	0.83004	1	0.006588	0.189723	0.382082	0.545455	0.747036	0.022398	0.272727	0.517787	0.732543	0.976285	0.345191	0.290237	0.00527	0.201581	0.399209	0.636364	0.997365	0.350461
0.386567	0.337313	0.276119	0.237668	0.192825	0.170404	0.01791	0.241791	0.574627	0.810448	0.998507	0.002985	0.185075	0.425373	0.716418	1	0.001493	0.316418	0.492537	0.679104	0.997015	0.502985	0.114925	0.38209	0.049327	0.085202	0.004484	0.001493	0.176119	0.532836	0.773134	1	0.031343	0.302985	0.459701	0.6	0.995522	0.002985	0.274627	0.501493	0.777612	0.956716	0.456716	0.337818	0.004478	0.255224	0.428358	0.68209	0.958209	0.383582
0.331865	0.389134	0.279001	0.286765	0.170588	0.227941	0.002937	0.239354	0.516887	0.779736	1	0.005874	0.23348	0.496329	0.741557	0.995595	0.001468	0.28047	0.48605	0.718062	0.998532	0.421439	0.161527	0.417034	0.091176	0.073529	0.002941	0.001468	0.240822	0.509545	0.820852	1	0.0279	0.229075	0.402349	0.888399	0.997063	0.008811	0.277533	0.527166	0.671072	0.92511	0.528634	0.367647	0.017621	0.264317	0.461087	0.690162	0.998532	0.409692
0.345133	0.510324	0.144543	0.322485	0.076923	0.180473	0.014749	0.20059	0.380531	0.59882	1	0.011799	0.315634	0.572271	0.766962	0.9941	0.00295	0.292035	0.557522	0.80236	0.985251	0.935103	0.020649	0.044248	0.023669	0.04142	0	0.00295	0.265487	0.519174	0.755162	1	0.032448	0.032448	0.132743	0.442478	0.852507	0.20059	0.20649	0.218289	0.410029	0.973451	0.233038	0.337278	0.00885	0.433628	0.690265	0.855457	0.982301	0.466077
0.430446	0.301837	0.267717	0.234211	0.2	0.192105	0.018373	0.278215	0.593176	0.800525	1	0.005249	0.186352	0.469816	0.71916	0.976378	0.002625	0.265092	0.451444	0.627297	0.971129	0.430446	0.094488	0.475066	0.044737	0.102632	0.002632	0.002625	0.115486	0.39895	0.700787	1	0.086614	0.24147	0.372703	0.48294	0.687664	0.12336	0.354331	0.587927	0.800525	0.992126	0.362205	0.342105	0.089239	0.270341	0.427822	0.56168	0.971129	0.32021
0.335893	0.414587	0.24952	0.298077	0.157692	0.221154	0.005758	0.295585	0.604607	0.827255	1	0.003839	0.232246	0.445298	0.731286	0.990403	0.001919	0.224568	0.454894	0.62572	0.998081	0.485605	0.049904	0.464491	0.026923	0.084615	0.003846	0.001919	0.222649	0.583493	0.848369	1	0.101727	0.111324	0.245681	0.602687	0.857965	0.015355	0.318618	0.477927	0.65643	0.953935	0.456814	0.342308	0.011516	0.245681	0.443378	0.612284	0.996161	0.397313
0.294404	0.389294	0.316302	0.209756	0.185366	0.24878	0.009732	0.182482	0.440389	0.705596	0.995134	0.007299	0.26764	0.515815	0.768856	0.997567	0.002433	0.248175	0.513382	0.781022	1	0.547445	0.184915	0.26764	0.063415	0.058537	0	0.002433	0.23601	0.540146	0.746959	1	0.082725	0.22871	0.403893	0.579075	0.885645	0.043796	0.277372	0.549878	0.79562	0.987835	0.532847	0.4	0.012165	0.291971	0.586375	0.798054	0.992701	0.386861
0.384793	0.428571	0.186636	0.290993	0.124711	0.180139	0.009217	0.292627	0.490783	0.741935	0.993088	0.004608	0.202765	0.421659	0.718894	0.997696	0.002304	0.336406	0.645161	0.781106	1	0.677419	0.073733	0.248848	0.039261	0.080831	0.006928	0.002304	0.25576	0.426267	0.668203	1	0.043779	0.12212	0.18894	0.576037	0.836406	0.006912	0.605991	0.709677	0.78341	0.958525	0.366359	0.332564	0.071429	0.437788	0.580645	0.732719	0.974654	0.400922
0.308017	0.379747	0.312236	0.254237	0.152542	0.245763	0.008439	0.202532	0.510549	0.767932	0.995781	0.050633	0.291139	0.506329	0.763713	0.987342	0.004219	0.232068	0.42616	0.662447	1	0.341772	0.092827	0.565401	0.042373	0.110169	0	0.004219	0.156118	0.438819	0.78481	1	0.43038	0.763713	0.818565	0.839662	0.987342	0.021097	0.253165	0.455696	0.611814	0.957806	0.493671	0.338983	0.029536	0.236287	0.438819	0.675105	0.991561	0.371308
0.460208	0.256055	0.283737	0.232639	0.263889	0.135417	0.010381	0.238754	0.449827	0.754325	1	0.00692	0.15917	0.463668	0.6609	0.989619	0.00346	0.352941	0.557093	0.761246	0.99308	0.487889	0.16609	0.346021	0.059028	0.052083	0.003472	0.00346	0.145329	0.384083	0.681661	1	0.072664	0.432526	0.581315	0.847751	0.892734	0.148789	0.304498	0.515571	0.757785	0.965398	0.408304	0.361111	0.069204	0.394464	0.570934	0.775087	0.965398	0.301038
0.328877	0.377005	0.294118	0.241287	0.184987	0.252011	0.005348	0.221925	0.508021	0.778075	1	0.010695	0.259358	0.513369	0.737968	0.991979	0.002674	0.262032	0.462567	0.695187	0.994652	0.524064	0.259358	0.216578	0.096515	0.053619	0.010724	0.002674	0.221925	0.435829	0.729947	1	0.072193	0.307487	0.526738	0.663102	0.997326	0.093583	0.165775	0.483957	0.874332	0.938503	0.497326	0.380697	0.010695	0.315508	0.513369	0.705882	0.994652	0.398396
0.451939	0.298482	0.249578	0.280405	0.206081	0.179054	0.008432	0.273187	0.499157	0.730185	0.996627	0.003373	0.264755	0.475548	0.745363	0.998314	0.001686	0.220911	0.51602	0.772344	1	0.51602	0.129848	0.354132	0.054054	0.084459	0	0.001686	0.234401	0.460371	0.655987	1	0.11973	0.219224	0.337268	0.790894	0.991568	0.016863	0.300169	0.625632	0.865093	0.984823	0.318718	0.361486	0.005059	0.175379	0.504216	0.79258	0.993255	0.338954
0.435374	0.369615	0.195011	0.322727	0.152273	0.163636	0.015873	0.285714	0.478458	0.705215	1	0.004535	0.24263	0.487528	0.739229	0.997732	0.002268	0.176871	0.53288	0.777778	0.99093	0.698413	0.097506	0.204082	0.056818	0.061364	0.006818	0.002268	0.23356	0.430839	0.693878	1	0.00907	0.21542	0.337868	0.77551	0.922902	0.040816	0.517007	0.623583	0.825397	0.988662	0.340136	0.286364	0.031746	0.181406	0.344671	0.741497	0.99093	0.39229
0.334582	0.360799	0.304619	0.25	0.21125	0.215	0.011236	0.245943	0.51186	0.757803	1	0.002497	0.260924	0.515605	0.755306	0.996255	0.001248	0.2397	0.469413	0.701623	0.998752	0.43196	0.174782	0.393258	0.0925	0.0775	0.0025	0.001248	0.278402	0.526841	0.787765	1	0.021223	0.194757	0.423221	0.875156	0.998752	0.041199	0.269663	0.500624	0.635456	0.957553	0.516854	0.4025	0.004994	0.25593	0.456929	0.681648	0.996255	0.39201
0.398827	0.313783	0.28739	0.255882	0.235294	0.197059	0.017595	0.272727	0.504399	0.83871	1	0.005865	0.28739	0.560117	0.747801	0.970674	0.002933	0.178886	0.428152	0.648094	0.941349	0.390029	0.202346	0.407625	0.064706	0.052941	0.011765	0.002933	0.222874	0.636364	0.900293	1	0.02346	0.105572	0.240469	0.656891	0.806452	0.143695	0.331378	0.44868	0.71261	0.868035	0.439883	0.452941	0.008798	0.211144	0.472141	0.674487	0.970674	0.343109
0.424242	0.30303	0.272727	0.305344	0.221374	0.21374	0.022727	0.325758	0.515152	0.772727	1	0.015152	0.227273	0.530303	0.80303	0.992424	0.007576	0.143939	0.371212	0.659091	0.954545	0.530303	0.113636	0.356061	0.045802	0.091603	0	0.007576	0.295455	0.712121	0.840909	1	0.022727	0.037879	0.128788	0.159091	0.954545	0.204545	0.310606	0.484848	0.613636	0.704545	0.416667	0.48855	0.015152	0.159091	0.371212	0.681818	0.954545	0.310606
0.322275	0.393365	0.28436	0.242857	0.190476	0.252381	0.014218	0.227488	0.440758	0.720379	1	0.009479	0.274882	0.57346	0.805687	0.995261	0.004739	0.241706	0.436019	0.677725	0.919431	0.445498	0.43128	0.123223	0.128571	0.052381	0.004762	0.004739	0.2891	0.56872	0.838863	1	0.028436	0.317536	0.492891	0.677725	0.886256	0.080569	0.104265	0.236967	0.279621	0.971564	0.417062	0.447619	0.018957	0.241706	0.440758	0.663507	0.890995	0.407583
0.328244	0.343511	0.328244	0.269231	0.192308	0.223077	0.015267	0.175573	0.412214	0.732824	0.977099	0.007634	0.282443	0.458015	0.709924	1	0.022901	0.251908	0.519084	0.80916	0.992366	0.412214	0.374046	0.21374	0.115385	0.038462	0.007692	0.007634	0.160305	0.305344	0.59542	1	0.030534	0.328244	0.465649	0.587786	0.70229	0.229008	0.78626	0.839695	0.908397	0.961832	0.450382	0.507692	0.022901	0.244275	0.541985	0.78626	0.969466	0.374046
0.254464	0.428571	0.316964	0.188341	0.170404	0.242152	0.013393	0.330357	0.59375	0.78125	0.986607	0.008929	0.183036	0.415179	0.683036	0.950893	0.004464	0.227679	0.549107	0.772321	1	0.5	0.178571	0.321429	0.058296	0.085202	0.004484	0.004464	0.142857	0.330357	0.633929	1	0.026786	0.339286	0.5625	0.620536	0.9375	0.09375	0.495536	0.6875	0.870536	0.991071	0.459821	0.466368	0.022321	0.245536	0.473214	0.6875	0.991071	0.473214
0.376623	0.313853	0.309524	0.262473	0.225597	0.193059	0.006494	0.218615	0.495671	0.761905	1	0.008658	0.268398	0.512987	0.746753	0.991342	0.002165	0.253247	0.469697	0.727273	0.995671	0.493506	0.188312	0.318182	0.086768	0.065076	0.004338	0.002165	0.192641	0.536797	0.785714	1	0.012987	0.077922	0.474026	0.850649	0.97619	0.207792	0.311688	0.448052	0.701299	0.989177	0.489177	0.368764	0.008658	0.322511	0.465368	0.735931	0.991342	0.322511
0.372236	0.347666	0.280098	0.253383	0.212792	0.186962	0.002457	0.244472	0.493857	0.79484	1	0.004914	0.146192	0.416462	0.681818	0.996314	0.001229	0.371007	0.587224	0.771499	0.995086	0.514742	0.293612	0.191646	0.105781	0.04428	0	0.001229	0.157248	0.384521	0.65602	1	0.070025	0.457002	0.604423	0.739558	0.993857	0.004914	0.212531	0.363636	0.925061	0.985258	0.472973	0.378844	0.004914	0.359951	0.54914	0.753071	0.995086	0.388206
0.447368	0.245614	0.307018	0.274336	0.274336	0.123894	0.017544	0.22807	0.54386	0.72807	0.991228	0.026316	0.245614	0.508772	0.824561	1	0.008772	0.219298	0.385965	0.692982	0.95614	0.403509	0.245614	0.350877	0.088496	0.070796	0	0.008772	0.201754	0.535088	0.631579	1	0.166667	0.254386	0.342105	0.421053	0.5	0.04386	0.122807	0.72807	0.842105	0.95614	0.412281	0.460177	0.026316	0.245614	0.464912	0.72807	0.95614	0.280702
0.404	0.284	0.312	0.212851	0.261044	0.192771	0.012	0.244	0.444	0.748	0.988	0.008	0.252	0.592	0.776	1	0.004	0.228	0.464	0.696	0.98	0.484	0.208	0.308	0.072289	0.032129	0	0.004	0.264	0.708	0.876	1	0.04	0.232	0.412	0.628	0.828	0.112	0.184	0.476	0.552	0.692	0.516	0.401606	0.02	0.228	0.48	0.684	0.98	0.284
0.342045	0.409091	0.248864	0.262799	0.171786	0.188851	0.006818	0.228409	0.496591	0.767045	0.996591	0.002273	0.351136	0.544318	0.754545	1	0.001136	0.165909	0.385227	0.6875	0.998864	0.760227	0.063636	0.176136	0.031854	0.031854	0.002275	0.001136	0.3875	0.584091	0.792045	1	0.029545	0.138636	0.231818	0.648864	0.868182	0.009091	0.056818	0.163636	0.281818	0.994318	0.270455	0.304892	0.003409	0.122727	0.25	0.442045	0.995455	0.404545
0.488235	0.264706	0.247059	0.272189	0.201183	0.201183	0.029412	0.235294	0.494118	0.794118	0.994118	0.011765	0.205882	0.441176	0.729412	0.988235	0.005882	0.294118	0.517647	0.652941	1	0.770588	0.041176	0.188235	0.053254	0.029586	0.005917	0.005882	0.188235	0.441176	0.8	1	0.358824	0.358824	0.470588	0.741176	0.852941	0.394118	0.435294	0.570588	0.617647	0.705882	0.247059	0.284024	0.047059	0.405882	0.570588	0.647059	0.976471	0.252941
0.441441	0.297297	0.261261	0.290909	0.163636	0.127273	0.018018	0.288288	0.486486	0.747748	0.981982	0.063063	0.261261	0.495495	0.675676	0.990991	0.009009	0.207207	0.351351	0.684685	1	0.45045	0.54955	0	0.181818	0	0	0.009009	0.18018	0.477477	0.711712	1	0.036036	0.243243	0.567568	0.792793	0.990991	0	0	0	0	0	0.441441	0.290909	0.036036	0.243243	0.54955	0.675676	0.936937	0.315315
0.353659	0.292683	0.353659	0.197531	0.246914	0.222222	0.060976	0.256098	0.414634	0.621951	0.95122	0.02439	0.158537	0.634146	0.841463	0.97561	0.012195	0.195122	0.439024	0.682927	1	0.378049	0.292683	0.329268	0.098765	0.074074	0	0.012195	0.121951	0.54878	0.829268	1	0.036585	0.280488	0.597561	0.731707	0.804878	0.134146	0.195122	0.426829	0.512195	0.939024	0.426829	0.493827	0.036585	0.170732	0.463415	0.646341	0.963415	0.292683
0.318043	0.385321	0.296636	0.254601	0.187117	0.251534	0.012232	0.211009	0.474006	0.697248	0.996942	0.006116	0.302752	0.556575	0.779817	1	0.003058	0.235474	0.446483	0.730887	0.984709	0.501529	0.262997	0.235474	0.104294	0.04908	0.01227	0.003058	0.238532	0.544343	0.7737	1	0.006116	0.250765	0.519878	0.666667	0.929664	0.024465	0.103976	0.461774	0.840979	0.981651	0.504587	0.368098	0.009174	0.302752	0.504587	0.727829	0.984709	0.373089
0.298337	0.391892	0.309771	0.239334	0.194589	0.255983	0.005198	0.254678	0.497921	0.774428	1	0.002079	0.247401	0.515593	0.730769	0.995842	0.00104	0.241164	0.486486	0.741164	0.997921	0.489605	0.22973	0.280665	0.094693	0.057232	0.003122	0.00104	0.213098	0.493763	0.748441	1	0.003119	0.164241	0.389813	0.790021	0.997921	0.008316	0.338877	0.572765	0.726611	0.992723	0.547817	0.382934	0.003119	0.254678	0.5	0.748441	0.997921	0.432432
0.382139	0.419522	0.198339	0.267152	0.138254	0.155925	0.005192	0.283489	0.528557	0.797508	0.995846	0.003115	0.253375	0.505711	0.751817	1	0.001038	0.195223	0.413292	0.654206	0.966771	0.64486	0.095535	0.259605	0.053015	0.071726	0.003119	0.001038	0.233645	0.483904	0.779855	1	0.006231	0.264798	0.491173	0.732087	0.856698	0.016615	0.244029	0.509865	0.697819	0.993769	0.336449	0.293139	0.004154	0.141225	0.390447	0.63136	0.966771	0.439252
0.38833	0.327968	0.283702	0.274194	0.191532	0.197581	0.006036	0.217304	0.440644	0.696177	1	0.004024	0.245473	0.515091	0.746479	0.993964	0.002012	0.31992	0.561368	0.790744	0.991952	0.468813	0.092555	0.438632	0.042339	0.094758	0.006048	0.002012	0.158954	0.368209	0.661972	1	0.070423	0.593561	0.762575	0.889336	0.969819	0.004024	0.32998	0.535211	0.750503	0.991952	0.38833	0.342742	0.016097	0.484909	0.657948	0.841046	0.991952	0.358149
0.349345	0.355167	0.295488	0.247813	0.225948	0.186589	0.002911	0.269287	0.532751	0.761281	1	0.014556	0.243086	0.499272	0.742358	0.994178	0.001456	0.234352	0.462882	0.730713	0.998544	0.365357	0.211063	0.423581	0.102041	0.075802	0.005831	0.001456	0.259098	0.491994	0.820961	1	0.008734	0.206696	0.416303	0.88064	0.997089	0.032023	0.285298	0.540029	0.681223	0.925764	0.534207	0.393586	0.010189	0.247453	0.467249	0.69869	0.998544	0.378457
0.378641	0.339806	0.281553	0.303922	0.205882	0.156863	0.038835	0.252427	0.427184	0.728155	0.990291	0.067961	0.242718	0.563107	0.786408	1	0.009709	0.116505	0.407767	0.699029	0.912621	0.61165	0.097087	0.291262	0.098039	0.098039	0	0.009709	0.203883	0.368932	0.679612	1	0.097087	0.106796	0.524272	0.543689	0.708738	0.126214	0.407767	0.61165	0.825243	0.912621	0.38835	0.392157	0.07767	0.252427	0.495146	0.699029	0.961165	0.349515
0.337134	0.338762	0.324104	0.215159	0.226569	0.203749	0.001629	0.267915	0.548046	0.824104	0.999186	0.0057	0.245928	0.502443	0.732085	0.996743	0.000814	0.232899	0.459283	0.693811	1	0.324919	0.021987	0.653094	0.012225	0.106764	0.002445	0.000814	0.280945	0.577362	0.888436	1	0.006515	0.88355	0.925896	0.947068	0.960912	0.004072	0.23127	0.460912	0.672638	0.997557	0.496743	0.378158	0.004886	0.233713	0.440554	0.679153	0.995114	0.367264
0.437016	0.322674	0.24031	0.262852	0.200776	0.152279	0.002907	0.16376	0.40407	0.741279	0.998062	0.001938	0.286822	0.534884	0.761628	0.997093	0.000969	0.372093	0.545543	0.732558	1	0.496124	0.125969	0.377907	0.050436	0.075655	0.00582	0.000969	0.176357	0.356589	0.69186	1	0.008721	0.460271	0.57655	0.695736	0.999031	0.061047	0.371124	0.58624	0.793605	0.987403	0.392442	0.325897	0.007752	0.407946	0.552326	0.718023	0.997093	0.360465
0.382582	0.349922	0.267496	0.274143	0.214953	0.188474	0.004666	0.317263	0.562986	0.765163	0.998445	0.00311	0.222395	0.489891	0.790047	1	0.001555	0.202177	0.412131	0.651633	0.993779	0.51633	0.144635	0.339036	0.057632	0.066978	0.007788	0.001555	0.29549	0.676516	0.861586	1	0.07154	0.283048	0.391913	0.539658	0.872473	0.012442	0.186625	0.40591	0.606532	0.85381	0.471229	0.342679	0.012442	0.202177	0.412131	0.62675	0.993779	0.387247
0.353952	0.358534	0.287514	0.248853	0.209862	0.207569	0.002291	0.271478	0.500573	0.735395	0.998855	0.005727	0.213058	0.429553	0.722795	0.996564	0.001145	0.280641	0.533792	0.778923	1	0.568156	0.106529	0.325315	0.040138	0.108945	0.008028	0.001145	0.186712	0.457045	0.739977	1	0.17984	0.616266	0.73425	0.799542	0.981672	0.005727	0.30126	0.467354	0.680412	0.973654	0.568156	0.383028	0.004582	0.183276	0.453608	0.737686	0.981672	0.363116
0.281893	0.465021	0.253086	0.226804	0.152577	0.249485	0.00823	0.240741	0.419753	0.769547	0.995885	0.004115	0.271605	0.549383	0.746914	1	0.002058	0.211934	0.471193	0.734568	0.979424	0.633745	0.158436	0.207819	0.061856	0.065979	0	0.002058	0.251029	0.567901	0.736626	1	0.004115	0.179012	0.366255	0.465021	0.979424	0.13786	0.290123	0.487654	0.790123	0.950617	0.580247	0.247423	0.006173	0.403292	0.611111	0.771605	0.979424	0.465021
0.449123	0.284211	0.266667	0.253521	0.232394	0.15493	0.007018	0.224561	0.494737	0.722807	0.992982	0.010526	0.245614	0.491228	0.761404	0.975439	0.003509	0.284211	0.508772	0.768421	1	0.421053	0.207018	0.37193	0.070423	0.077465	0	0.003509	0.249123	0.480702	0.701754	1	0.161404	0.333333	0.65614	0.789474	0.922807	0.017544	0.133333	0.491228	0.726316	0.992982	0.336842	0.302817	0.02807	0.305263	0.568421	0.761404	0.996491	0.34386
0.340659	0.395604	0.263736	0.355556	0.144444	0.2	0.043956	0.186813	0.43956	0.725275	1	0.021978	0.197802	0.516484	0.714286	0.989011	0.010989	0.32967	0.56044	0.747253	0.967033	0.593407	0.373626	0.032967	0.155556	0.022222	0	0.010989	0.142857	0.362637	0.593407	1	0.252747	0.395604	0.659341	0.769231	0.912088	0.945055	0.945055	0.945055	0.956044	0.967033	0.395604	0.333333	0.098901	0.384615	0.516484	0.67033	0.912088	0.406593
0.337143	0.445714	0.217143	0.333333	0.172414	0.189655	0.028571	0.211429	0.451429	0.697143	0.994286	0.011429	0.234286	0.52	0.782857	1	0.005714	0.291429	0.497143	0.68	0.954286	0.611429	0.154286	0.234286	0.063218	0.051724	0.017241	0.005714	0.165714	0.32	0.605714	1	0.017143	0.445714	0.657143	0.714286	0.845714	0.022857	0.48	0.737143	0.794286	0.937143	0.382857	0.402299	0.022857	0.285714	0.445714	0.657143	0.965714	0.417143
0.31094	0.370441	0.318618	0.240385	0.205769	0.242308	0.015355	0.307102	0.556622	0.771593	0.998081	0.007678	0.236084	0.491363	0.775432	1	0.001919	0.21881	0.441459	0.683301	0.996161	0.429942	0.153551	0.416507	0.053846	0.076923	0.015385	0.001919	0.170825	0.476008	0.754319	1	0.038388	0.357006	0.577735	0.715931	0.857965	0.072937	0.25144	0.491363	0.742802	0.975048	0.558541	0.357692	0.003839	0.234165	0.462572	0.68906	0.950096	0.385797
0.431579	0.210526	0.357895	0.148936	0.297872	0.191489	0.031579	0.2	0.431579	0.663158	0.968421	0.021053	0.463158	0.673684	0.894737	0.989474	0.010526	0.242105	0.421053	0.705263	1	0.4	0.042105	0.557895	0.042553	0.085106	0	0.010526	0.494737	0.610526	0.757895	1	0.568421	0.568421	0.947368	0.957895	0.968421	0.031579	0.157895	0.336842	0.694737	0.873684	0.4	0.425532	0.052632	0.378947	0.631579	0.768421	0.947368	0.189474
0.355422	0.36747	0.277108	0.269618	0.191147	0.181087	0.008032	0.2249	0.463855	0.753012	1	0.004016	0.263052	0.528112	0.769076	0.995984	0.002008	0.2751	0.516064	0.706827	0.981928	0.48996	0.160643	0.349398	0.078471	0.074447	0.01006	0.002008	0.251004	0.568273	0.807229	1	0.046185	0.192771	0.626506	0.773092	0.935743	0.02008	0.2751	0.445783	0.610442	0.993976	0.600402	0.321932	0.02008	0.285141	0.508032	0.706827	0.995984	0.381526
0.380531	0.292035	0.327434	0.276786	0.25	0.1875	0.017699	0.159292	0.424779	0.690265	1	0.035398	0.256637	0.539823	0.778761	0.99115	0.00885	0.238938	0.442478	0.752212	0.982301	0.460177	0.442478	0.097345	0.098214	0.044643	0.008929	0.00885	0.150442	0.504425	0.716814	1	0.026549	0.292035	0.451327	0.60177	0.911504	0.097345	0.106195	0.920354	0.946903	0.973451	0.380531	0.535714	0.026549	0.221239	0.39823	0.734513	0.955752	0.265487
0.365217	0.243478	0.391304	0.175439	0.289474	0.175439	0.026087	0.234783	0.504348	0.695652	1	0.034783	0.217391	0.426087	0.686957	0.991304	0.008696	0.278261	0.565217	0.756522	0.956522	0.417391	0.156522	0.426087	0.052632	0.087719	0	0.008696	0.2	0.356522	0.721739	1	0.286957	0.313043	0.426087	0.46087	0.782609	0.078261	0.478261	0.6	0.869565	0.982609	0.46087	0.368421	0.052174	0.321739	0.556522	0.747826	0.982609	0.217391
0.368864	0.417952	0.213184	0.280899	0.151685	0.161517	0.002805	0.235624	0.429173	0.667602	0.998597	0.004208	0.290323	0.608696	0.810659	1	0.001403	0.231417	0.464236	0.681627	0.997195	0.706872	0.145863	0.147265	0.075843	0.047753	0	0.001403	0.308555	0.605891	0.786816	1	0.00561	0.224404	0.352034	0.546985	0.995792	0.02805	0.15568	0.269285	0.509116	0.848527	0.45021	0.33427	0.007013	0.339411	0.628331	0.812062	0.99439	0.415147
0.33657	0.320388	0.343042	0.194805	0.224026	0.253247	0.006472	0.239482	0.504854	0.754045	1	0.012945	0.307443	0.533981	0.779935	0.990291	0.003236	0.213592	0.449838	0.711974	0.996764	0.501618	0.307443	0.190939	0.116883	0.045455	0.006494	0.003236	0.239482	0.511327	0.744337	1	0.009709	0.294498	0.543689	0.721683	0.990291	0.019417	0.084142	0.378641	0.76699	0.993528	0.537217	0.363636	0.012945	0.330097	0.530744	0.757282	0.996764	0.300971
0.315985	0.3829	0.301115	0.25	0.186567	0.242537	0.007435	0.286245	0.494424	0.762082	1	0.022305	0.260223	0.572491	0.784387	0.996283	0.003717	0.200743	0.408922	0.609665	0.988848	0.773234	0.152416	0.074349	0.070896	0.033582	0.011194	0.003717	0.330855	0.550186	0.747212	1	0.011152	0.223048	0.282528	0.821561	0.918216	0.052045	0.066914	0.156134	0.472119	0.988848	0.364312	0.425373	0.01487	0.249071	0.483271	0.825279	0.988848	0.412639
0.360424	0.289753	0.349823	0.187943	0.248227	0.258865	0.007067	0.226148	0.477032	0.738516	1	0.014134	0.261484	0.526502	0.773852	0.996466	0.003534	0.233216	0.491166	0.724382	0.978799	0.282686	0.091873	0.625442	0.031915	0.08156	0.003546	0.003534	0.137809	0.44523	0.773852	1	0.010601	0.038869	0.081272	0.109541	0.176678	0.144876	0.360424	0.565371	0.763251	0.978799	0.515901	0.382979	0.010601	0.257951	0.4947	0.731449	0.968198	0.272085
0.354198	0.377099	0.268702	0.25841	0.174312	0.200306	0.00458	0.224427	0.509924	0.8	1	0.003053	0.250382	0.471756	0.731298	0.993893	0.001527	0.265649	0.517557	0.708397	0.99542	0.523664	0.158779	0.317557	0.061162	0.058104	0.003058	0.001527	0.251908	0.505344	0.763359	1	0.045802	0.265649	0.473282	0.570992	0.874809	0.061069	0.244275	0.552672	0.824427	0.99542	0.448855	0.357798	0.019847	0.244275	0.526718	0.70687	0.99542	0.410687
0.333805	0.500707	0.165488	0.229462	0.135977	0.127479	0.004243	0.404526	0.643564	0.78925	0.998586	0.002829	0.190948	0.335219	0.635078	0.997171	0.001414	0.442716	0.571429	0.762376	1	0.677511	0.080622	0.241867	0.033994	0.028329	0	0.001414	0.171146	0.340877	0.644979	1	0.155587	0.463932	0.526167	0.585573	0.909477	0.359264	0.608204	0.725601	0.786421	0.862801	0.428571	0.271955	0.007072	0.356436	0.579915	0.865629	0.98727	0.489392
0.378446	0.323308	0.298246	0.228356	0.209536	0.200753	0.003759	0.205514	0.510025	0.775689	1	0.002506	0.243108	0.491228	0.73183	0.997494	0.001253	0.266917	0.488722	0.734336	0.998747	0.570175	0.139098	0.290727	0.058971	0.091593	0.003764	0.001253	0.263158	0.551378	0.750627	1	0.098997	0.333333	0.535088	0.738095	0.907268	0.011278	0.121554	0.373434	0.759398	0.988722	0.462406	0.311167	0.015038	0.23183	0.432331	0.740602	0.989975	0.35213
0.343558	0.404908	0.251534	0.253086	0.179012	0.234568	0.018405	0.282209	0.558282	0.754601	0.97546	0.01227	0.171779	0.447853	0.736196	1	0.006135	0.208589	0.417178	0.687117	0.981595	0.368098	0.190184	0.441718	0.061728	0.098765	0	0.006135	0.147239	0.411043	0.668712	1	0.018405	0.055215	0.343558	0.558282	0.828221	0.134969	0.441718	0.662577	0.797546	0.98773	0.411043	0.481481	0.02454	0.233129	0.441718	0.699387	0.957055	0.503067
0.329412	0.4	0.270588	0.22619	0.22619	0.22619	0.035294	0.294118	0.517647	0.682353	0.988235	0.023529	0.188235	0.435294	0.776471	0.976471	0.011765	0.164706	0.458824	0.670588	1	0.529412	0.258824	0.211765	0.142857	0.047619	0	0.011765	0.2	0.517647	0.788235	1	0.070588	0.552941	0.647059	0.764706	0.941176	0.141176	0.235294	0.294118	0.341176	0.4	0.447059	0.52381	0.058824	0.270588	0.6	0.776471	0.952941	0.329412
0.450704	0.232394	0.316901	0.184397	0.297872	0.156028	0.014085	0.225352	0.43662	0.739437	0.992958	0.021127	0.302817	0.549296	0.802817	0.957746	0.007042	0.21831	0.507042	0.690141	1	0.232394	0	0.767606	0	0.12766	0	0.007042	0.260563	0.5	0.690141	1	0	0	0	0	0	0.028169	0.239437	0.464789	0.746479	0.978873	0.535211	0.368794	0.035211	0.302817	0.521127	0.71831	0.922535	0.260563
0.330645	0.383065	0.28629	0.210526	0.202429	0.174089	0.028226	0.225806	0.471774	0.689516	0.955645	0.008065	0.254032	0.58871	0.879032	1	0.004032	0.233871	0.439516	0.608871	0.887097	0.53629	0.21371	0.25	0.048583	0.05668	0.016194	0.004032	0.193548	0.483871	0.862903	1	0.133065	0.225806	0.362903	0.604839	0.858871	0.104839	0.28629	0.520161	0.693548	0.806452	0.395161	0.331984	0.096774	0.28629	0.504032	0.645161	0.975806	0.423387
0.313589	0.397213	0.289199	0.223776	0.178322	0.244755	0.038328	0.229965	0.41115	0.783972	1	0.006969	0.292683	0.526132	0.686411	0.993031	0.003484	0.191638	0.508711	0.790941	0.989547	0.606272	0.188153	0.205575	0.083916	0.048951	0	0.003484	0.355401	0.529617	0.679443	1	0.010453	0.170732	0.313589	0.853659	0.993031	0.101045	0.146341	0.348432	0.804878	0.937282	0.439024	0.405594	0.010453	0.212544	0.522648	0.763066	0.993031	0.390244
0.398305	0.29661	0.305085	0.205128	0.273504	0.25641	0.016949	0.161017	0.432203	0.711864	0.991525	0.025424	0.322034	0.542373	0.822034	0.974576	0.008475	0.228814	0.449153	0.745763	1	0.313559	0.228814	0.457627	0.08547	0.068376	0	0.008475	0.262712	0.508475	0.754237	1	0.271186	0.313559	0.398305	0.491525	0.847458	0.025424	0.127119	0.59322	0.70339	0.957627	0.457627	0.324786	0.042373	0.29661	0.483051	0.779661	0.983051	0.305085
0.293403	0.374132	0.332465	0.212858	0.19722	0.259774	0.005208	0.18316	0.479167	0.724826	0.997396	0.001736	0.261285	0.500868	0.74566	0.999132	0.000868	0.27691	0.510417	0.767361	1	0.463542	0.131944	0.404514	0.054735	0.068636	0.000869	0.000868	0.232639	0.488715	0.776042	1	0.127604	0.228299	0.554688	0.802951	0.994792	0.015625	0.280382	0.503472	0.736979	0.985243	0.540799	0.385752	0.007812	0.289931	0.511285	0.749132	0.998264	0.384549
0.360902	0.323308	0.315789	0.272727	0.227273	0.174242	0.037594	0.285714	0.466165	0.706767	0.984962	0.015038	0.180451	0.526316	0.774436	1	0.007519	0.240602	0.481203	0.766917	0.992481	0.368421	0.345865	0.285714	0.143939	0.05303	0.007576	0.007519	0.338346	0.556391	0.721805	1	0.180451	0.383459	0.586466	0.81203	0.992481	0.030075	0.090226	0.24812	0.315789	0.917293	0.458647	0.439394	0.037594	0.240602	0.503759	0.789474	0.992481	0.338346
0.323308	0.390977	0.285714	0.242938	0.190207	0.220339	0.005639	0.266917	0.537594	0.802632	0.99812	0.003759	0.25188	0.520677	0.755639	0.996241	0.00188	0.214286	0.43985	0.648496	1	0.479323	0.06015	0.460526	0.016949	0.073446	0.00565	0.00188	0.257519	0.612782	0.843985	1	0.058271	0.071429	0.191729	0.389098	0.639098	0.005639	0.31203	0.477444	0.644737	0.994361	0.488722	0.308851	0.007519	0.219925	0.43609	0.62782	0.992481	0.413534
0.341667	0.308333	0.35	0.205021	0.246862	0.205021	0.008333	0.254167	0.475	0.745833	0.9875	0.029167	0.2	0.483333	0.795833	0.991667	0.004167	0.245833	0.525	0.725	1	0.491667	0.2875	0.220833	0.07113	0.054393	0.012552	0.004167	0.179167	0.470833	0.829167	1	0.016667	0.2125	0.329167	0.683333	0.983333	0.283333	0.391667	0.6	0.770833	0.925	0.45	0.32636	0.020833	0.320833	0.525	0.7	0.995833	0.354167
0.340278	0.399306	0.260417	0.273043	0.144348	0.203478	0.005208	0.199653	0.418403	0.708333	0.994792	0.006944	0.248264	0.522569	0.743056	0.996528	0.001736	0.309028	0.567708	0.776042	1	0.539931	0.125	0.335069	0.048696	0.086957	0.003478	0.001736	0.164931	0.34375	0.637153	1	0.236111	0.571181	0.696181	0.871528	0.960069	0.005208	0.380208	0.588542	0.791667	0.991319	0.520833	0.365217	0.008681	0.322917	0.538194	0.743056	0.986111	0.432292
0.363636	0.290909	0.345455	0.259259	0.314815	0.222222	0.036364	0.272727	0.490909	0.745455	1	0.145455	0.254545	0.527273	0.690909	0.890909	0.018182	0.109091	0.418182	0.781818	0.963636	0.418182	0.236364	0.345455	0.092593	0.074074	0	0.109091	0.181818	0.472727	0.654545	1	0.018182	0.054545	0.563636	0.618182	0.981818	0.254545	0.309091	0.4	0.745455	0.836364	0.327273	0.444444	0.054545	0.290909	0.454545	0.8	0.963636	0.309091
0.354839	0.270968	0.374194	0.168831	0.25974	0.24026	0.025806	0.193548	0.483871	0.793548	0.987097	0.012903	0.206452	0.445161	0.735484	1	0.006452	0.264516	0.516129	0.709677	0.993548	0.296774	0	0.703226	0	0.103896	0	0.006452	0.187097	0.348387	0.729032	1	0	0	0	0	0	0.051613	0.251613	0.516129	0.76129	0.980645	0.522581	0.363636	0.058065	0.270968	0.548387	0.741935	0.974194	0.283871
0.382524	0.328155	0.28932	0.27821	0.208171	0.200389	0.005825	0.219417	0.47767	0.749515	0.998058	0.003883	0.260194	0.518447	0.737864	0.982524	0.001942	0.252427	0.479612	0.743689	1	0.568932	0.186408	0.24466	0.066148	0.058366	0.007782	0.001942	0.198058	0.574757	0.75534	1	0.01165	0.357282	0.499029	0.798058	0.996117	0.085437	0.273786	0.438835	0.625243	0.986408	0.48932	0.350195	0.013592	0.304854	0.524272	0.790291	0.996117	0.341748
0.398438	0.328125	0.273438	0.251969	0.220472	0.15748	0.023438	0.25	0.5	0.742188	0.976562	0.015625	0.28125	0.539062	0.796875	0.992188	0.007812	0.148438	0.335938	0.632812	1	0.3125	0.21875	0.46875	0.07874	0.062992	0.015748	0.007812	0.265625	0.421875	0.734375	1	0.03125	0.078125	0.382812	0.484375	0.71875	0.125	0.234375	0.648438	0.859375	0.976562	0.40625	0.362205	0.03125	0.179688	0.40625	0.609375	0.8125	0.375
0.336735	0.362245	0.30102	0.235294	0.209719	0.191816	0.007653	0.257653	0.512755	0.793367	0.994898	0.005102	0.209184	0.52551	0.795918	1	0.002551	0.237245	0.443878	0.658163	0.905612	0.357143	0.058673	0.584184	0.033248	0.099744	0.012788	0.002551	0.247449	0.558673	0.875	1	0.040816	0.076531	0.091837	0.420918	0.818878	0.010204	0.306122	0.497449	0.670918	0.954082	0.533163	0.409207	0.010204	0.288265	0.520408	0.704082	0.959184	0.418367
0.279245	0.366038	0.354717	0.200758	0.231061	0.238636	0.026415	0.271698	0.464151	0.773585	0.996226	0.007547	0.181132	0.498113	0.720755	0.984906	0.003774	0.283019	0.520755	0.724528	1	0.418868	0.29434	0.286792	0.087121	0.041667	0.003788	0.003774	0.207547	0.50566	0.690566	1	0.124528	0.222642	0.460377	0.713208	0.856604	0.018868	0.362264	0.539623	0.920755	0.992453	0.566038	0.386364	0.011321	0.267925	0.509434	0.728302	0.988679	0.388679
0.364395	0.378303	0.257302	0.274373	0.193593	0.190808	0.009736	0.272601	0.545202	0.746871	0.998609	0.002782	0.289291	0.54242	0.788595	0.995828	0.001391	0.171071	0.382476	0.655076	1	0.694019	0.1363	0.16968	0.061281	0.041783	0.005571	0.001391	0.388039	0.625869	0.803894	1	0.004172	0.107093	0.230876	0.453408	0.973574	0.026426	0.161335	0.262865	0.411683	0.956885	0.577191	0.384401	0.004172	0.286509	0.568846	0.783032	0.997218	0.393602
0.402174	0.358696	0.23913	0.373626	0.186813	0.175824	0.054348	0.25	0.5	0.76087	1	0.021739	0.23913	0.521739	0.728261	0.98913	0.01087	0.141304	0.413043	0.597826	0.934783	0.315217	0.271739	0.413043	0.087912	0.10989	0.021978	0.01087	0.456522	0.673913	0.75	1	0.065217	0.130435	0.76087	0.826087	0.945652	0.032609	0.25	0.358696	0.5	0.978261	0.347826	0.43956	0.065217	0.326087	0.532609	0.695652	0.956522	0.391304
0.422509	0.315498	0.261993	0.297597	0.179298	0.190388	0.005535	0.191882	0.433579	0.739852	0.998155	0.00369	0.258303	0.49262	0.730627	0.99631	0.001845	0.359779	0.568266	0.761993	1	0.592251	0.226937	0.180812	0.103512	0.05915	0.003697	0.001845	0.201107	0.442804	0.774908	1	0.009225	0.383764	0.601476	0.763838	0.994465	0.04059	0.350554	0.501845	0.660517	0.98893	0.359779	0.32902	0.01107	0.400369	0.595941	0.782288	0.990775	0.376384
0.329624	0.354659	0.315716	0.220056	0.21727	0.233983	0.006954	0.305981	0.567455	0.802503	0.998609	0.002782	0.196106	0.450626	0.714882	0.995828	0.001391	0.225313	0.50904	0.727399	1	0.426982	0.109875	0.463143	0.050139	0.091922	0.005571	0.001391	0.242003	0.421419	0.659249	1	0.082058	0.214186	0.446453	0.535466	0.795549	0.019471	0.260083	0.61057	0.838665	0.987483	0.49235	0.426184	0.005563	0.261474	0.489569	0.668985	0.993046	0.392211
0.305785	0.371901	0.322314	0.196687	0.231884	0.26294	0.004132	0.241736	0.533058	0.774793	1	0.018595	0.256198	0.483471	0.743802	0.997934	0.002066	0.245868	0.477273	0.719008	0.979339	0.359504	0.231405	0.409091	0.080745	0.072464	0.00207	0.002066	0.289256	0.576446	0.822314	1	0.006198	0.159091	0.328512	0.63843	0.971074	0.035124	0.247934	0.52686	0.729339	0.948347	0.578512	0.397516	0.006198	0.280992	0.481405	0.694215	0.983471	0.380165
0.38565	0.318386	0.295964	0.252252	0.247748	0.162162	0.017937	0.224215	0.502242	0.721973	1	0.008969	0.273543	0.430493	0.690583	0.950673	0.004484	0.210762	0.600897	0.798206	0.986547	0.506726	0.125561	0.367713	0.058559	0.058559	0.004505	0.004484	0.295964	0.421525	0.704036	1	0.080717	0.139013	0.609865	0.762332	0.932735	0.017937	0.201794	0.55157	0.793722	0.986547	0.497758	0.378378	0.026906	0.300448	0.533632	0.789238	0.986547	0.331839
0.350746	0.264925	0.384328	0.168539	0.265918	0.202247	0.018657	0.242537	0.503731	0.742537	0.992537	0.007463	0.186567	0.414179	0.664179	1	0.003731	0.291045	0.570896	0.779851	0.996269	0.380597	0.175373	0.44403	0.052434	0.097378	0	0.003731	0.156716	0.455224	0.675373	1	0.126866	0.287313	0.395522	0.608209	0.701493	0.022388	0.253731	0.507463	0.824627	0.988806	0.552239	0.419476	0.018657	0.238806	0.477612	0.679104	0.996269	0.257463
0.422269	0.302521	0.27521	0.231579	0.233684	0.16	0.006303	0.222689	0.44958	0.726891	1	0.004202	0.210084	0.504202	0.737395	0.989496	0.002101	0.367647	0.569328	0.773109	0.991597	0.489496	0.117647	0.392857	0.046316	0.08	0.004211	0.002101	0.189076	0.430672	0.733193	1	0.184874	0.531513	0.602941	0.72479	0.821429	0.010504	0.313025	0.489496	0.802521	0.993697	0.434874	0.336842	0.014706	0.42437	0.605042	0.777311	0.991597	0.338235
0.319635	0.328767	0.351598	0.229358	0.206422	0.229358	0.009132	0.242009	0.493151	0.762557	1	0.027397	0.255708	0.406393	0.634703	0.981735	0.004566	0.214612	0.575342	0.789954	0.986301	0.515982	0.173516	0.310502	0.073394	0.055046	0	0.004566	0.292237	0.420091	0.703196	1	0.009132	0.050228	0.13242	0.744292	0.931507	0.16895	0.242009	0.579909	0.808219	0.986301	0.506849	0.394495	0.013699	0.242009	0.52968	0.785388	0.986301	0.310502
0.295172	0.423448	0.281379	0.251381	0.189227	0.226519	0.006897	0.22069	0.502069	0.754483	1	0.002759	0.263448	0.504828	0.765517	0.994483	0.001379	0.24	0.474483	0.715862	0.998621	0.394483	0.17931	0.426207	0.087017	0.075967	0.006906	0.001379	0.246897	0.528276	0.827586	1	0.026207	0.195862	0.368276	0.871724	0.983448	0.048276	0.296552	0.521379	0.678621	0.924138	0.515862	0.361878	0.009655	0.25931	0.468966	0.691034	0.998621	0.431724
0.344749	0.424658	0.230594	0.279176	0.173913	0.196796	0.004566	0.30137	0.570776	0.787671	0.997717	0.006849	0.194064	0.388128	0.728311	0.993151	0.002283	0.351598	0.538813	0.703196	1	0.671233	0.041096	0.287671	0.02746	0.050343	0	0.002283	0.187215	0.356164	0.753425	1	0.041096	0.047945	0.860731	0.869863	0.965753	0.009132	0.525114	0.614155	0.728311	0.90411	0.390411	0.356979	0.013699	0.26484	0.497717	0.684932	0.984018	0.383562
0.265659	0.462203	0.272138	0.207792	0.160173	0.233766	0.030238	0.278618	0.475162	0.639309	0.993521	0.00432	0.209503	0.50108	0.796976	0.99784	0.00216	0.304536	0.509719	0.742981	1	0.730022	0.079914	0.190065	0.034632	0.04329	0.004329	0.00216	0.205184	0.490281	0.794816	1	0.023758	0.159827	0.451404	0.529158	0.833693	0.220302	0.37149	0.557235	0.650108	0.948164	0.468683	0.341991	0.008639	0.263499	0.531317	0.799136	0.963283	0.475162
0.3	0.285714	0.414286	0.188406	0.246377	0.15942	0.042857	0.214286	0.442857	0.714286	0.957143	0.057143	0.328571	0.414286	0.642857	0.942857	0.014286	0.142857	0.557143	0.785714	1	0.4	0.4	0.2	0.188406	0.043478	0.014493	0.014286	0.314286	0.628571	0.828571	1	0.228571	0.371429	0.571429	0.785714	0.914286	0.057143	0.085714	0.142857	0.185714	0.514286	0.571429	0.26087	0.057143	0.371429	0.514286	0.771429	0.928571	0.314286
0.377823	0.340862	0.281314	0.263374	0.193416	0.183128	0.004107	0.246407	0.505133	0.770021	0.997947	0.008214	0.250513	0.517454	0.767967	1	0.002053	0.234086	0.474333	0.698152	0.98768	0.525667	0.164271	0.310062	0.076132	0.076132	0.002058	0.002053	0.205339	0.529774	0.800821	1	0.024641	0.135524	0.474333	0.804928	0.98768	0.008214	0.36345	0.494867	0.683778	0.944559	0.466119	0.329218	0.008214	0.377823	0.511294	0.755647	0.98768	0.342916
0.356234	0.287532	0.356234	0.201531	0.267857	0.216837	0.007634	0.221374	0.468193	0.722646	0.987277	0.005089	0.290076	0.549618	0.804071	0.994911	0.002545	0.239186	0.470738	0.748092	1	0.358779	0.139949	0.501272	0.066327	0.071429	0.010204	0.002545	0.147583	0.384224	0.597964	1	0.058524	0.211196	0.394402	0.572519	0.900763	0.012723	0.29771	0.659033	0.821883	0.984733	0.559796	0.433673	0.010178	0.249364	0.503817	0.732824	0.979644	0.292621
0.28551	0.392577	0.321913	0.234286	0.175714	0.248571	0.001428	0.290507	0.508922	0.758744	0.996431	0.002855	0.231263	0.473947	0.73733	0.999286	0.000714	0.243398	0.517488	0.750178	1	0.539615	0.373305	0.087081	0.117143	0.027143	0.004286	0.000714	0.24768	0.484654	0.721627	1	0.002141	0.227695	0.492505	0.744468	0.93576	0.033547	0.321199	0.660956	0.958601	0.995004	0.610992	0.29	0.002141	0.255532	0.523911	0.753747	0.998572	0.427552
0.27027	0.525799	0.203931	0.275862	0.110837	0.192118	0.004914	0.199017	0.371007	0.55774	1	0.009828	0.358722	0.628993	0.798526	0.995086	0.002457	0.154791	0.353808	0.58231	0.987715	0.710074	0.149877	0.140049	0.059113	0.039409	0	0.002457	0.429975	0.643735	0.820639	1	0.027027	0.125307	0.206388	0.375921	0.459459	0.017199	0.149877	0.240786	0.334152	0.484029	0.513514	0.305419	0.022113	0.336609	0.565111	0.712531	0.990172	0.530713
0.338983	0.317797	0.34322	0.221277	0.259574	0.246809	0.012712	0.190678	0.394068	0.682203	1	0.008475	0.326271	0.550847	0.792373	0.991525	0.004237	0.241525	0.512712	0.741525	0.995763	0.45339	0.165254	0.381356	0.076596	0.102128	0.008511	0.004237	0.186441	0.525424	0.690678	1	0.275424	0.34322	0.402542	0.648305	0.987288	0.012712	0.211864	0.487288	0.834746	0.966102	0.533898	0.451064	0.021186	0.351695	0.588983	0.75	0.995763	0.326271
0.460526	0.263158	0.276316	0.238411	0.298013	0.15894	0.013158	0.25	0.480263	0.703947	1	0.072368	0.263158	0.539474	0.717105	0.993421	0.006579	0.190789	0.532895	0.782895	0.967105	0.348684	0.309211	0.342105	0.125828	0.059603	0.006623	0.006579	0.144737	0.559211	0.75	1	0.013158	0.236842	0.605263	0.875	0.973684	0.059211	0.315789	0.401316	0.638158	0.822368	0.401316	0.476821	0.019737	0.203947	0.513158	0.723684	0.967105	0.25
0.322519	0.396947	0.280534	0.250478	0.195029	0.189293	0.007634	0.236641	0.492366	0.772901	1	0.003817	0.278626	0.498092	0.753817	0.996183	0.001908	0.167939	0.494275	0.711832	0.992366	0.471374	0.051527	0.477099	0.051625	0.086042	0.001912	0.001908	0.307252	0.597328	0.85687	1	0.007634	0.135496	0.316794	0.793893	0.89313	0.022901	0.196565	0.425573	0.635496	0.992366	0.425573	0.424474	0.009542	0.301527	0.507634	0.700382	0.992366	0.414122
0.354571	0.385042	0.260388	0.266667	0.188889	0.208333	0.00831	0.299169	0.493075	0.736842	0.980609	0.00554	0.213296	0.501385	0.783934	1	0.00277	0.279778	0.495845	0.706371	0.98338	0.542936	0.290859	0.166205	0.088889	0.044444	0.005556	0.00277	0.177285	0.576177	0.792244	1	0.116343	0.238227	0.457064	0.747922	0.927978	0.310249	0.362881	0.493075	0.598338	0.980609	0.531856	0.311111	0.01108	0.240997	0.531856	0.745152	0.98892	0.398892
0.312253	0.375494	0.312253	0.253968	0.190476	0.234127	0.01581	0.213439	0.426877	0.731225	0.956522	0.007905	0.3083	0.549407	0.810277	1	0.003953	0.229249	0.482213	0.695652	0.988142	0.442688	0.189723	0.367589	0.063492	0.063492	0	0.003953	0.367589	0.754941	0.885375	1	0.142292	0.201581	0.355731	0.719368	0.833992	0.01581	0.110672	0.407115	0.501976	0.889328	0.41502	0.388889	0.019763	0.225296	0.442688	0.648221	0.972332	0.387352
0.328571	0.378571	0.292857	0.302158	0.194245	0.230216	0.021429	0.171429	0.478571	0.792857	1	0.028571	0.214286	0.435714	0.678571	0.992857	0.007143	0.3	0.514286	0.735714	0.978571	0.514286	0.235714	0.25	0.100719	0.043165	0	0.007143	0.15	0.5	0.642857	1	0.057143	0.457143	0.664286	0.742857	0.957143	0.221429	0.321429	0.385714	0.814286	0.878571	0.478571	0.374101	0.064286	0.314286	0.485714	0.728571	0.942857	0.342857
0.406926	0.372294	0.220779	0.304348	0.16087	0.182609	0.012987	0.264069	0.47619	0.731602	1	0.008658	0.212121	0.502165	0.766234	0.995671	0.004329	0.199134	0.463203	0.727273	0.930736	0.549784	0.090909	0.359307	0.047826	0.056522	0.004348	0.004329	0.337662	0.619048	0.757576	1	0.017316	0.056277	0.333333	0.52381	0.978355	0.077922	0.168831	0.380952	0.562771	0.904762	0.320346	0.382609	0.017316	0.199134	0.497835	0.753247	0.969697	0.337662
0.350515	0.484536	0.164948	0.25	0.125	0.15625	0.030928	0.216495	0.474227	0.670103	0.907216	0.020619	0.247423	0.515464	0.835052	1	0.010309	0.195876	0.381443	0.71134	0.938144	0.597938	0.134021	0.268041	0.083333	0.0625	0	0.010309	0.216495	0.43299	0.804124	1	0.164948	0.185567	0.278351	0.350515	0.958763	0.051546	0.515464	0.639175	0.701031	0.773196	0.257732	0.354167	0.164948	0.278351	0.505155	0.690722	0.927835	0.443299
0.45092	0.392638	0.156442	0.378462	0.12	0.098462	0.006135	0.315951	0.527607	0.760736	0.993865	0.009202	0.340491	0.625767	0.834356	1	0.003067	0.113497	0.199387	0.312883	0.745399	0.671779	0.101227	0.226994	0.067692	0.092308	0	0.003067	0.346626	0.558282	0.757669	1	0.052147	0.122699	0.233129	0.325153	0.518405	0.01227	0.171779	0.47546	0.806748	0.98773	0.220859	0.276923	0.009202	0.156442	0.257669	0.441718	0.97546	0.380368
0.395876	0.347423	0.256701	0.251806	0.201238	0.169247	0.006186	0.253608	0.543299	0.760825	1	0.002062	0.337113	0.527835	0.769072	0.997938	0.001031	0.160825	0.375258	0.690722	0.996907	0.687629	0.073196	0.239175	0.037152	0.068111	0.004128	0.001031	0.34433	0.556701	0.754639	1	0.027835	0.174227	0.290722	0.724742	0.981443	0.005155	0.084536	0.247423	0.735052	0.997938	0.374227	0.352941	0.003093	0.157732	0.378351	0.672165	0.996907	0.375258
0.382658	0.37983	0.237512	0.260377	0.168868	0.184906	0.001885	0.264844	0.566447	0.708765	1	0.00754	0.269557	0.516494	0.786051	0.998115	0.000943	0.209237	0.402451	0.758718	0.999057	0.532516	0.168709	0.298775	0.077358	0.073585	0.00566	0.000943	0.33082	0.592837	0.799246	1	0.002828	0.095193	0.286522	0.793591	0.976437	0.065975	0.243167	0.404336	0.622997	0.986805	0.377945	0.303774	0.00377	0.176249	0.326107	0.548539	0.991517	0.381715
0.352617	0.311295	0.336088	0.205517	0.230345	0.216552	0.002755	0.239669	0.480716	0.731405	0.991736	0.006887	0.257576	0.517906	0.754821	0.997245	0.001377	0.241047	0.508264	0.761708	1	0.42562	0.23416	0.34022	0.084138	0.062069	0.004138	0.001377	0.241047	0.428375	0.712121	1	0.11157	0.230028	0.487603	0.898072	0.998623	0.008264	0.322314	0.578512	0.750689	0.885675	0.539945	0.377931	0.00551	0.289256	0.512397	0.758953	0.995868	0.327824
0.373874	0.382883	0.243243	0.312217	0.18552	0.171946	0.013514	0.225225	0.45045	0.725225	0.986486	0.009009	0.265766	0.472973	0.752252	1	0.004505	0.171171	0.558559	0.738739	0.936937	0.54955	0.130631	0.31982	0.072398	0.072398	0	0.004505	0.256757	0.405405	0.68018	1	0.018018	0.072072	0.563063	0.702703	0.878378	0.094595	0.193694	0.612613	0.828829	0.990991	0.5	0.352941	0.018018	0.31982	0.504505	0.738739	0.981982	0.396396
0.345196	0.405694	0.24911	0.282143	0.167857	0.207143	0.017794	0.263345	0.508897	0.864769	0.996441	0.010676	0.298932	0.572954	0.743772	1	0.003559	0.185053	0.409253	0.569395	0.967972	0.683274	0.120996	0.19573	0.064286	0.071429	0	0.003559	0.362989	0.565836	0.765125	1	0.039146	0.135231	0.19573	0.298932	0.822064	0.081851	0.227758	0.341637	0.857651	0.975089	0.430605	0.342857	0.035587	0.202847	0.476868	0.604982	0.967972	0.380783
0.477124	0.202614	0.320261	0.171053	0.348684	0.171053	0.013072	0.267974	0.477124	0.732026	1	0.065359	0.189542	0.398693	0.594771	0.901961	0.006536	0.235294	0.575163	0.784314	0.980392	0.339869	0.300654	0.359477	0.125	0.072368	0.006579	0.006536	0.143791	0.54902	0.75817	1	0.013072	0.235294	0.588235	0.856209	0.954248	0.058824	0.313725	0.405229	0.627451	0.973856	0.392157	0.486842	0.019608	0.202614	0.51634	0.745098	0.980392	0.228758
0.315315	0.418919	0.265766	0.270677	0.141353	0.190977	0.012012	0.193694	0.496997	0.779279	0.996997	0.003003	0.192192	0.426426	0.707207	1	0.001502	0.381381	0.564565	0.764264	0.986486	0.516517	0.138138	0.345345	0.055639	0.070677	0.007519	0.001502	0.186186	0.366366	0.684685	1	0.004505	0.430931	0.645646	0.8003	0.914414	0.01952	0.348348	0.564565	0.791291	0.996997	0.478979	0.336842	0.003003	0.381381	0.548048	0.764264	0.986486	0.435435
0.333333	0.343434	0.323232	0.265306	0.193878	0.204082	0.070707	0.323232	0.565657	0.727273	1	0.020202	0.181818	0.444444	0.737374	0.979798	0.010101	0.232323	0.474747	0.686869	0.969697	0.373737	0.222222	0.40404	0.122449	0.061224	0	0.010101	0.212121	0.535354	0.888889	1	0.191919	0.474747	0.747475	0.79798	0.949495	0.060606	0.151515	0.40404	0.616162	0.717172	0.444444	0.44898	0.040404	0.262626	0.494949	0.757576	0.969697	0.292929
0.328213	0.351657	0.320129	0.217638	0.236246	0.219256	0.00485	0.206144	0.481811	0.755861	1	0.001617	0.264349	0.489086	0.731609	0.999192	0.000808	0.279709	0.524656	0.757478	0.997575	0.47211	0.144705	0.383185	0.054207	0.06877	0.005663	0.000808	0.226354	0.489895	0.770412	1	0.004042	0.219887	0.495554	0.691188	0.997575	0.058205	0.291835	0.521423	0.736459	0.991108	0.52304	0.380259	0.004042	0.292643	0.506871	0.746968	0.997575	0.354082
0.356164	0.356164	0.287671	0.236111	0.277778	0.125	0.013699	0.136986	0.410959	0.630137	0.972603	0.205479	0.369863	0.671233	0.808219	0.958904	0.041096	0.164384	0.383562	0.60274	1	0.39726	0.30137	0.30137	0.152778	0.069444	0.013889	0.013699	0.219178	0.438356	0.589041	1	0.041096	0.39726	0.671233	0.739726	0.986301	0.082192	0.136986	0.328767	0.821918	0.90411	0.369863	0.472222	0.054795	0.246575	0.493151	0.684932	0.958904	0.342466
0.374808	0.339478	0.285714	0.28	0.22	0.181538	0.00768	0.215054	0.485407	0.774194	1	0.004608	0.227343	0.479263	0.751152	0.996928	0.001536	0.325653	0.528418	0.731183	0.995392	0.548387	0.135177	0.316436	0.061538	0.061538	0.006154	0.001536	0.150538	0.302611	0.639017	1	0.004608	0.430108	0.606759	0.721966	0.887865	0.225806	0.454685	0.686636	0.855607	0.996928	0.466974	0.36	0.006144	0.371736	0.548387	0.766513	0.995392	0.390169
0.330935	0.334532	0.334532	0.184116	0.231047	0.227437	0.007194	0.244604	0.521583	0.773381	1	0.014388	0.21223	0.535971	0.730216	0.978417	0.003597	0.258993	0.460432	0.705036	0.996403	0.363309	0.169065	0.467626	0.050542	0.101083	0	0.003597	0.201439	0.442446	0.719424	1	0.169065	0.266187	0.417266	0.625899	0.715827	0.007194	0.223022	0.507194	0.820144	0.992806	0.546763	0.404332	0.014388	0.251799	0.464029	0.672662	0.996403	0.363309
0.364469	0.302198	0.333333	0.218349	0.269725	0.19633	0.005495	0.25641	0.489011	0.760073	0.996337	0.007326	0.203297	0.446886	0.736264	0.998168	0.001832	0.287546	0.529304	0.747253	1	0.342491	0.087912	0.569597	0.034862	0.104587	0.005505	0.001832	0.254579	0.470696	0.727106	1	0.043956	0.197802	0.239927	0.267399	0.377289	0.003663	0.362637	0.564103	0.800366	0.994505	0.569597	0.418349	0.003663	0.260073	0.483516	0.738095	0.998168	0.309524
0.259542	0.381679	0.358779	0.215385	0.215385	0.284615	0.022901	0.167939	0.412214	0.618321	0.954198	0.015267	0.274809	0.610687	0.80916	1	0.007634	0.244275	0.465649	0.732824	0.992366	0.381679	0.343511	0.274809	0.176923	0.053846	0.007692	0.007634	0.328244	0.549618	0.717557	1	0.175573	0.381679	0.580153	0.80916	0.992366	0.038168	0.099237	0.251908	0.687023	0.916031	0.48855	0.430769	0.030534	0.267176	0.580153	0.78626	0.992366	0.335878
0.270142	0.407583	0.322275	0.190476	0.209524	0.271429	0.037915	0.208531	0.374408	0.691943	0.971564	0.009479	0.222749	0.526066	0.819905	1	0.004739	0.2891	0.49763	0.7109	0.943128	0.464455	0.374408	0.161137	0.128571	0.061905	0.004762	0.004739	0.265403	0.56872	0.78673	1	0.009479	0.28436	0.43128	0.611374	0.85782	0.07109	0.208531	0.64455	0.881517	0.990521	0.417062	0.428571	0.014218	0.279621	0.450237	0.677725	0.981043	0.42654
0.344086	0.392473	0.263441	0.286486	0.189189	0.205405	0.010753	0.241935	0.5	0.790323	0.994624	0.021505	0.172043	0.397849	0.704301	1	0.005376	0.349462	0.516129	0.698925	0.989247	0.580645	0.155914	0.263441	0.054054	0.064865	0.021622	0.005376	0.155914	0.317204	0.623656	1	0.096774	0.413978	0.645161	0.682796	0.967742	0.016129	0.456989	0.688172	0.752688	0.930108	0.403226	0.421622	0.016129	0.274194	0.456989	0.72043	0.951613	0.38172
0.37561	0.35122	0.273171	0.269608	0.254902	0.181373	0.014634	0.195122	0.419512	0.692683	1	0.009756	0.239024	0.502439	0.765854	0.995122	0.004878	0.356098	0.560976	0.77561	0.985366	0.502439	0.165854	0.331707	0.068627	0.088235	0.009804	0.004878	0.156098	0.521951	0.77561	1	0.219512	0.282927	0.619512	0.946341	0.990244	0.039024	0.341463	0.439024	0.721951	0.926829	0.458537	0.470588	0.019512	0.360976	0.517073	0.746341	0.985366	0.317073
0.34188	0.358974	0.299145	0.215517	0.215517	0.224138	0.051282	0.213675	0.42735	0.709402	0.991453	0.017094	0.299145	0.615385	0.735043	1	0.008547	0.179487	0.444444	0.74359	0.982906	0.367521	0.179487	0.452991	0.086207	0.103448	0	0.008547	0.358974	0.57265	0.760684	1	0.025641	0.059829	0.393162	0.623932	0.820513	0.094017	0.196581	0.478632	0.709402	0.982906	0.512821	0.396552	0.034188	0.324786	0.512821	0.717949	0.982906	0.367521
0.347705	0.40751	0.244784	0.256267	0.17688	0.175487	0.004172	0.260083	0.50765	0.752434	1	0.009736	0.223922	0.454798	0.767733	0.995828	0.001391	0.328234	0.563282	0.741307	0.998609	0.606398	0.130737	0.262865	0.05571	0.058496	0.005571	0.001391	0.178025	0.333797	0.706537	1	0.005563	0.452017	0.646732	0.776078	0.88178	0.006954	0.461752	0.582754	0.763561	0.927677	0.496523	0.356546	0.005563	0.32128	0.538248	0.74548	0.998609	0.435327
0.39599	0.397243	0.206767	0.331242	0.159348	0.16813	0.005013	0.256892	0.52381	0.799499	1	0.002506	0.276942	0.467419	0.734336	0.996241	0.001253	0.179198	0.484962	0.685464	0.997494	0.714286	0.070175	0.215539	0.035132	0.067754	0	0.001253	0.239348	0.457393	0.695489	1	0.070175	0.358396	0.754386	0.883459	0.938596	0.005013	0.186717	0.552632	0.834586	0.997494	0.327068	0.351317	0.003759	0.229323	0.541353	0.775689	0.997494	0.442356
0.408805	0.27044	0.320755	0.227848	0.227848	0.189873	0.018868	0.201258	0.427673	0.72327	0.987421	0.012579	0.339623	0.534591	0.773585	0.981132	0.006289	0.194969	0.45283	0.660377	1	0.339623	0.08805	0.572327	0.037975	0.088608	0	0.006289	0.081761	0.427673	0.710692	1	0.45283	0.465409	0.490566	0.528302	0.566038	0.132075	0.283019	0.603774	0.792453	0.981132	0.459119	0.443038	0.044025	0.264151	0.534591	0.742138	0.981132	0.264151
0.478972	0.292056	0.228972	0.250585	0.208431	0.140515	0.004673	0.189252	0.462617	0.768692	0.997664	0.007009	0.271028	0.514019	0.754673	1	0.002336	0.324766	0.518692	0.670561	0.995327	0.446262	0.044393	0.509346	0.023419	0.084309	0.004684	0.002336	0.175234	0.352804	0.764019	1	0.018692	0.093458	0.376168	0.983645	0.995327	0.044393	0.385514	0.542056	0.698598	0.922897	0.317757	0.388759	0.018692	0.287383	0.504673	0.623832	0.995327	0.366822
0.379971	0.33137	0.28866	0.255162	0.225664	0.171091	0.007364	0.21944	0.493373	0.75405	0.998527	0.004418	0.151694	0.427099	0.720177	1	0.001473	0.381443	0.578792	0.759941	0.995582	0.544919	0.142857	0.312224	0.048673	0.066372	0.007375	0.001473	0.148748	0.291605	0.628866	1	0.0162	0.509573	0.677467	0.801178	0.916053	0.125184	0.446244	0.606775	0.821797	0.989691	0.455081	0.327434	0.004418	0.416789	0.57732	0.78056	0.994109	0.37408
0.323484	0.412131	0.264386	0.260125	0.165109	0.266355	0.00311	0.211509	0.438569	0.727838	1	0.006221	0.264386	0.513219	0.744946	0.99689	0.001555	0.261275	0.531882	0.77916	0.990669	0.525661	0.111975	0.362364	0.101246	0.095016	0.010903	0.001555	0.227061	0.438569	0.741835	1	0.066874	0.276827	0.528771	0.734059	0.970451	0.031104	0.311042	0.539658	0.755832	0.968896	0.342146	0.507788	0.018663	0.258165	0.517885	0.755832	0.987558	0.421462
0.272849	0.467742	0.259409	0.22611	0.164199	0.230148	0.009409	0.307796	0.567204	0.748656	0.995968	0.004032	0.181452	0.392473	0.724462	1	0.001344	0.358871	0.571237	0.762097	0.991935	0.646505	0.120968	0.232527	0.047106	0.063257	0.004038	0.001344	0.18414	0.408602	0.776882	1	0.094086	0.525538	0.668011	0.737903	0.979839	0.163978	0.372312	0.538978	0.700269	0.97043	0.478495	0.374159	0.033602	0.194892	0.549731	0.754032	0.990591	0.452957
0.431767	0.369128	0.199105	0.320628	0.183857	0.14574	0.008949	0.272931	0.512304	0.774049	1	0.004474	0.187919	0.42953	0.686801	0.975391	0.002237	0.304251	0.624161	0.753915	0.995526	0.753915	0.053691	0.192394	0.038117	0.05157	0.002242	0.002237	0.234899	0.427293	0.720358	1	0.053691	0.178971	0.199105	0.691275	0.832215	0.114094	0.608501	0.702461	0.760626	0.988814	0.373602	0.367713	0.013423	0.425056	0.58613	0.751678	0.995526	0.353468
0.36377	0.416789	0.21944	0.262537	0.179941	0.165192	0.002946	0.265096	0.477172	0.734904	0.994109	0.005891	0.216495	0.546392	0.740795	0.997054	0.001473	0.253314	0.458027	0.762887	1	0.689249	0.029455	0.281296	0.022124	0.081121	0.013274	0.001473	0.215022	0.5243	0.733432	1	0.032401	0.409426	0.425626	0.837997	0.949926	0.050074	0.301915	0.466863	0.904271	0.991163	0.322533	0.39823	0.011782	0.284242	0.513991	0.751105	0.995582	0.409426
0.350482	0.379421	0.270096	0.267311	0.170692	0.219002	0.009646	0.220257	0.504823	0.78135	0.998392	0.003215	0.263666	0.493569	0.721865	0.977492	0.001608	0.249196	0.490354	0.734727	1	0.530547	0.162379	0.307074	0.062802	0.062802	0.00161	0.001608	0.226688	0.501608	0.721865	1	0.049839	0.28135	0.469453	0.553055	0.871383	0.028939	0.250804	0.564309	0.836013	0.996785	0.437299	0.347826	0.004823	0.245981	0.469453	0.70418	0.993569	0.419614
0.243647	0.603886	0.152466	0.293413	0.086826	0.164671	0.00299	0.198804	0.412556	0.811659	0.998505	0.008969	0.349776	0.553064	0.747384	0.994021	0.001495	0.104634	0.237668	0.587444	1	0.68012	0.09417	0.22571	0.041916	0.062874	0.002994	0.001495	0.307922	0.512706	0.753363	1	0.00299	0.058296	0.158445	0.212257	0.967115	0.022422	0.189836	0.626308	0.886398	0.989537	0.608371	0.335329	0.004484	0.328849	0.526158	0.733931	0.994021	0.556054
0.365482	0.286802	0.347716	0.190597	0.287166	0.205845	0.002538	0.255076	0.517766	0.738579	0.998731	0.005076	0.239848	0.472081	0.756345	0.993655	0.001269	0.244924	0.496193	0.743655	1	0.468274	0.238579	0.293147	0.105464	0.062262	0.003812	0.001269	0.204315	0.44797	0.733503	1	0.03934	0.248731	0.423858	0.813452	0.998731	0.006345	0.322335	0.576142	0.706853	0.991117	0.567259	0.404066	0.003807	0.261421	0.475888	0.742386	0.997462	0.319797
0.436	0.372	0.192	0.281124	0.188755	0.136546	0.012	0.208	0.492	0.776	1	0.008	0.304	0.548	0.744	0.996	0.004	0.196	0.38	0.64	0.96	0.728	0.1	0.172	0.040161	0.048193	0	0.004	0.248	0.604	0.784	1	0.26	0.36	0.384	0.444	0.936	0.016	0.052	0.32	0.476	0.856	0.356	0.305221	0.052	0.384	0.636	0.768	0.944	0.344
0.386207	0.324138	0.289655	0.298611	0.1875	0.229167	0.034483	0.289655	0.462069	0.703448	0.986207	0.013793	0.241379	0.517241	0.751724	0.993103	0.006897	0.151724	0.434483	0.724138	1	0.462069	0.144828	0.393103	0.097222	0.083333	0.013889	0.006897	0.234483	0.510345	0.772414	1	0.068966	0.117241	0.268966	0.703448	0.903448	0.131034	0.289655	0.427586	0.655172	0.958621	0.42069	0.333333	0.062069	0.17931	0.372414	0.696552	0.972414	0.372414
0.321053	0.373684	0.305263	0.253968	0.216931	0.222222	0.015789	0.189474	0.484211	0.757895	1	0.010526	0.263158	0.531579	0.784211	0.984211	0.005263	0.242105	0.473684	0.678947	0.994737	0.310526	0.031579	0.657895	0.010582	0.126984	0	0.005263	0.236842	0.531579	0.863158	1	0.968421	0.968421	0.978947	0.984211	0.994737	0.047368	0.221053	0.473684	0.684211	0.915789	0.521053	0.412698	0.042105	0.294737	0.5	0.694737	0.994737	0.415789
0.364692	0.29036	0.344948	0.206977	0.265116	0.206977	0.003484	0.229965	0.516841	0.761905	0.998839	0.009292	0.2741	0.505226	0.747967	0.996516	0.001161	0.24158	0.490128	0.739837	1	0.377468	0.038328	0.584204	0.019767	0.084884	0.005814	0.001161	0.28223	0.458769	0.684088	1	0.278746	0.384437	0.653891	0.832753	0.911731	0.036005	0.210221	0.511034	0.772358	0.996516	0.545877	0.355814	0.026713	0.296167	0.508711	0.757259	0.996516	0.305459
0.264516	0.44086	0.294624	0.226293	0.170259	0.232759	0.004301	0.189247	0.462366	0.707527	0.997849	0.006452	0.301075	0.554839	0.782796	1	0.002151	0.206452	0.423656	0.675269	0.995699	0.44086	0.189247	0.369892	0.068966	0.073276	0.00431	0.002151	0.286022	0.509677	0.767742	1	0.12043	0.266667	0.623656	0.756989	0.929032	0.025806	0.204301	0.430108	0.696774	0.989247	0.544086	0.396552	0.008602	0.27957	0.51828	0.733333	0.995699	0.44086
0.385768	0.35206	0.262172	0.263158	0.210526	0.229323	0.007491	0.220974	0.434457	0.737828	0.996255	0.011236	0.333333	0.610487	0.812734	1	0.003745	0.179775	0.40824	0.64794	0.985019	0.303371	0.265918	0.430712	0.075188	0.067669	0.007519	0.003745	0.134831	0.531835	0.76779	1	0.044944	0.138577	0.28839	0.794007	0.985019	0.161049	0.385768	0.509363	0.726592	0.93633	0.464419	0.473684	0.022472	0.2397	0.505618	0.722846	0.985019	0.430712
0.357143	0.337662	0.305195	0.313725	0.189542	0.20915	0.051948	0.318182	0.545455	0.818182	1	0.012987	0.175325	0.376623	0.694805	0.974026	0.006494	0.266234	0.454545	0.720779	0.993506	0.448052	0.097403	0.454545	0.039216	0.091503	0	0.006494	0.116883	0.324675	0.681818	1	0.123377	0.266234	0.292208	0.396104	0.422078	0.051948	0.5	0.623377	0.766234	0.915584	0.454545	0.352941	0.032468	0.285714	0.474026	0.720779	0.935065	0.331169
0.326923	0.370192	0.302885	0.270531	0.207729	0.241546	0.009615	0.225962	0.432692	0.677885	1	0.014423	0.264423	0.5625	0.807692	0.995192	0.004808	0.235577	0.475962	0.706731	0.908654	0.418269	0.394231	0.1875	0.130435	0.05314	0.004831	0.004808	0.283654	0.596154	0.807692	1	0.014423	0.293269	0.442308	0.610577	0.884615	0.076923	0.115385	0.264423	0.783654	0.961538	0.427885	0.444444	0.019231	0.25	0.456731	0.682692	0.889423	0.360577
0.357143	0.295918	0.346939	0.201365	0.238908	0.228669	0.010204	0.27551	0.520408	0.778912	1	0.006803	0.214286	0.486395	0.690476	0.996599	0.003401	0.238095	0.493197	0.734694	0.989796	0.387755	0.166667	0.445578	0.047782	0.095563	0	0.003401	0.173469	0.442177	0.707483	1	0.180272	0.357143	0.455782	0.653061	0.741497	0.034014	0.241497	0.534014	0.833333	0.993197	0.540816	0.395904	0.02381	0.255102	0.486395	0.676871	0.989796	0.326531
0.398058	0.330097	0.271845	0.235294	0.176471	0.196078	0.029126	0.145631	0.330097	0.592233	0.970874	0.019417	0.359223	0.582524	0.796117	0.990291	0.009709	0.262136	0.514563	0.825243	1	0.368932	0.029126	0.601942	0.019608	0.098039	0	0.009709	0.378641	0.631068	0.776699	1	0.951456	0.951456	0.951456	0.961165	0.970874	0.029126	0.165049	0.38835	0.61165	0.883495	0.368932	0.411765	0.126214	0.300971	0.640777	0.796117	0.951456	0.300971
0.392135	0.267416	0.340449	0.208099	0.271091	0.1991	0.004494	0.17191	0.408989	0.721348	0.998876	0.002247	0.295506	0.519101	0.793258	0.988764	0.001124	0.303371	0.540449	0.766292	1	0.333708	0.094382	0.57191	0.035996	0.094488	0.008999	0.001124	0.224719	0.41573	0.810112	1	0.053933	0.330337	0.742697	0.907865	0.988764	0.003371	0.25618	0.486517	0.704494	0.997753	0.558427	0.418448	0.003371	0.34382	0.546067	0.766292	0.996629	0.28764
0.408696	0.321739	0.269565	0.298246	0.219298	0.157895	0.017391	0.252174	0.521739	0.817391	1	0.052174	0.26087	0.504348	0.73913	0.956522	0.008696	0.156522	0.373913	0.652174	0.965217	0.478261	0.521739	0	0.192982	0	0	0.008696	0.191304	0.495652	0.73913	1	0.026087	0.295652	0.469565	0.782609	0.965217	0	0	0	0	0	0.408696	0.315789	0.026087	0.286957	0.469565	0.678261	0.965217	0.330435
0.389937	0.352201	0.257862	0.291139	0.208861	0.177215	0.018868	0.238994	0.45283	0.672956	1	0.012579	0.220126	0.54717	0.786164	0.949686	0.006289	0.251572	0.465409	0.754717	0.981132	0.36478	0.301887	0.333333	0.094937	0.06962	0.018987	0.006289	0.132075	0.440252	0.528302	1	0.031447	0.427673	0.792453	0.899371	0.987421	0.125786	0.27044	0.371069	0.63522	0.880503	0.421384	0.455696	0.044025	0.301887	0.566038	0.779874	0.981132	0.320755
0.30814	0.383721	0.30814	0.251462	0.187135	0.216374	0.011628	0.174419	0.395349	0.715116	1	0.034884	0.290698	0.540698	0.755814	0.994186	0.005814	0.203488	0.5	0.703488	0.988372	0.348837	0.232558	0.418605	0.093567	0.081871	0.011696	0.005814	0.244186	0.453488	0.697674	1	0.087209	0.186047	0.267442	0.540698	0.627907	0.052326	0.354651	0.709302	0.843023	0.988372	0.552326	0.421053	0.063953	0.30814	0.552326	0.72093	0.988372	0.412791
0.313433	0.343284	0.343284	0.207265	0.230769	0.232906	0.004264	0.277186	0.528785	0.771855	1	0.014925	0.204691	0.462687	0.71855	0.997868	0.002132	0.245203	0.492537	0.739872	0.98081	0.439232	0.179104	0.381663	0.066239	0.074786	0.010684	0.002132	0.19403	0.428571	0.641791	1	0.040512	0.206823	0.351812	0.47548	0.73774	0.004264	0.307036	0.720682	0.861407	0.968017	0.573561	0.384615	0.006397	0.206823	0.441365	0.692964	0.98081	0.356077
0.451505	0.337793	0.210702	0.278523	0.194631	0.157718	0.006689	0.274247	0.565217	0.755853	1	0.013378	0.267559	0.458194	0.719064	0.996656	0.003344	0.16388	0.337793	0.829431	0.986622	0.618729	0.207358	0.173913	0.080537	0.053691	0.006711	0.003344	0.280936	0.518395	0.688963	1	0.060201	0.150502	0.26087	0.354515	0.889632	0.056856	0.668896	0.849498	0.946488	0.989967	0.331104	0.281879	0.013378	0.16388	0.297659	0.48495	0.986622	0.411371
0.384615	0.306122	0.309262	0.218553	0.231132	0.187107	0.00314	0.288854	0.577708	0.839874	0.99843	0.00471	0.233909	0.480377	0.722135	0.993721	0.00157	0.21821	0.437991	0.660911	1	0.408163	0.128728	0.463108	0.048742	0.095912	0.004717	0.00157	0.22135	0.491366	0.769231	1	0.078493	0.246468	0.401884	0.572998	0.990581	0.018838	0.265306	0.55573	0.828885	0.971743	0.477237	0.352201	0.007849	0.213501	0.430141	0.624804	0.992151	0.33124
0.35	0.353846	0.296154	0.27027	0.204633	0.200772	0.011538	0.296154	0.511538	0.788462	1	0.007692	0.153846	0.426923	0.730769	0.980769	0.003846	0.292308	0.492308	0.734615	0.984615	0.5	0.361538	0.138462	0.138996	0.03861	0	0.003846	0.157692	0.534615	0.753846	1	0.115385	0.430769	0.584615	0.811538	0.980769	0.034615	0.165385	0.203846	0.246154	0.469231	0.5	0.393822	0.015385	0.265385	0.523077	0.765385	0.984615	0.361538
0.339869	0.48366	0.176471	0.311475	0.147541	0.137705	0.055556	0.316993	0.470588	0.761438	0.973856	0.006536	0.153595	0.434641	0.748366	1	0.003268	0.398693	0.575163	0.718954	0.986928	0.699346	0.094771	0.205882	0.045902	0.039344	0	0.003268	0.205882	0.490196	0.816993	1	0.323529	0.578431	0.666667	0.718954	0.957516	0.006536	0.395425	0.447712	0.614379	0.75817	0.415033	0.334426	0.052288	0.199346	0.624183	0.862745	0.993464	0.477124
0.305195	0.467532	0.227273	0.286645	0.143322	0.205212	0.012987	0.211039	0.415584	0.701299	0.987013	0.006494	0.318182	0.61039	0.827922	1	0.003247	0.214286	0.376623	0.623377	0.957792	0.62013	0.090909	0.288961	0.035831	0.055375	0.009772	0.003247	0.285714	0.652597	0.844156	1	0.233766	0.253247	0.363636	0.477273	0.801948	0.029221	0.12013	0.415584	0.558442	0.75974	0.503247	0.345277	0.035714	0.301948	0.548701	0.821429	0.993506	0.477273
0.389671	0.239437	0.370892	0.152941	0.284706	0.183529	0.004695	0.253521	0.502347	0.753521	0.997653	0.035211	0.232394	0.521127	0.751174	1	0.002347	0.239437	0.474178	0.730047	0.992958	0.359155	0.140845	0.5	0.070588	0.089412	0.004706	0.002347	0.206573	0.549296	0.809859	1	0.039906	0.279343	0.518779	0.91784	0.995305	0.007042	0.253521	0.460094	0.704225	0.946009	0.586854	0.343529	0.00939	0.246479	0.462441	0.669014	0.992958	0.239437
0.479167	0.260417	0.260417	0.263158	0.231579	0.136842	0.03125	0.166667	0.375	0.635417	1	0.020833	0.354167	0.59375	0.739583	0.958333	0.010417	0.3125	0.541667	0.8125	0.979167	0.677083	0.020833	0.302083	0.042105	0.042105	0	0.010417	0.166667	0.333333	0.614583	1	0.354167	0.354167	0.354167	0.354167	0.645833	0.510417	0.572917	0.78125	0.854167	0.9375	0.322917	0.357895	0.145833	0.5	0.65625	0.854167	0.96875	0.3125
0.353333	0.306667	0.34	0.202673	0.238307	0.193764	0.004444	0.302222	0.522222	0.797778	0.997778	0.006667	0.18	0.464444	0.737778	0.995556	0.002222	0.251111	0.493333	0.711111	1	0.411111	0.173333	0.415556	0.055679	0.095768	0.006682	0.002222	0.277778	0.573333	0.835556	1	0.095556	0.284444	0.466667	0.668889	0.784444	0.011111	0.195556	0.431111	0.688889	0.993333	0.542222	0.347439	0.011111	0.213333	0.413333	0.68	0.991111	0.322222
0.4	0.333333	0.266667	0.244094	0.228346	0.216535	0.011765	0.278431	0.47451	0.709804	0.988235	0.007843	0.223529	0.478431	0.760784	1	0.003922	0.262745	0.537255	0.780392	0.996078	0.396078	0.223529	0.380392	0.070866	0.055118	0	0.003922	0.231373	0.454902	0.792157	1	0.039216	0.270588	0.352941	0.772549	0.992157	0.109804	0.2	0.529412	0.698039	0.882353	0.501961	0.425197	0.019608	0.243137	0.537255	0.784314	0.976471	0.286275
0.391608	0.244755	0.363636	0.197183	0.267606	0.211268	0.020979	0.244755	0.517483	0.762238	0.965035	0.013986	0.167832	0.503497	0.734266	0.972028	0.006993	0.258741	0.475524	0.741259	1	0.356643	0.300699	0.342657	0.119718	0.077465	0.007042	0.006993	0.223776	0.447552	0.699301	1	0.027972	0.272727	0.496503	0.713287	0.993007	0.055944	0.132867	0.545455	0.797203	0.916084	0.503497	0.464789	0.027972	0.251748	0.48951	0.734266	0.979021	0.27972
0.466501	0.305211	0.228288	0.281095	0.199005	0.146766	0.007444	0.2134	0.454094	0.751861	1	0.004963	0.260546	0.545906	0.82134	0.985112	0.002481	0.317618	0.496278	0.669975	0.997519	0.511166	0.233251	0.255583	0.089552	0.064677	0	0.002481	0.26799	0.538462	0.784119	1	0.151365	0.377171	0.468983	0.702233	0.997519	0.007444	0.131514	0.48139	0.734491	0.980149	0.37469	0.363184	0.012407	0.337469	0.513648	0.744417	0.997519	0.369727
0.446043	0.244604	0.309353	0.246377	0.326087	0.086957	0.021583	0.28777	0.539568	0.76259	1	0.035971	0.23741	0.410072	0.870504	0.964029	0.007194	0.208633	0.460432	0.647482	0.978417	0.388489	0.165468	0.446043	0.057971	0.072464	0	0.007194	0.316547	0.705036	0.899281	1	0.021583	0.05036	0.258993	0.42446	0.467626	0.107914	0.208633	0.57554	0.683453	0.805755	0.359712	0.376812	0.035971	0.179856	0.446043	0.625899	0.877698	0.251799
0.343478	0.334783	0.321739	0.231441	0.20524	0.20524	0.008696	0.282609	0.504348	0.782609	0.991304	0.021739	0.243478	0.478261	0.726087	0.986957	0.004348	0.208696	0.495652	0.695652	1	0.452174	0.073913	0.473913	0.034934	0.078603	0	0.004348	0.134783	0.326087	0.608696	1	0.047826	0.613043	0.630435	0.647826	0.691304	0.082609	0.426087	0.569565	0.834783	0.986957	0.504348	0.401747	0.017391	0.23913	0.482609	0.730435	0.986957	0.334783
0.416244	0.22335	0.360406	0.183673	0.270408	0.153061	0.015228	0.19797	0.431472	0.705584	1	0.010152	0.208122	0.548223	0.720812	0.994924	0.005076	0.335025	0.532995	0.77665	0.989848	0.492386	0.152284	0.35533	0.061224	0.081633	0.020408	0.005076	0.15736	0.527919	0.730964	1	0.238579	0.274112	0.614213	0.715736	0.989848	0.040609	0.350254	0.461929	0.756345	0.959391	0.461929	0.418367	0.020305	0.340102	0.51269	0.675127	0.989848	0.192893
0.289308	0.396226	0.314465	0.214173	0.162205	0.248819	0.004717	0.238994	0.449686	0.756289	1	0.003145	0.215409	0.492138	0.746855	0.993711	0.001572	0.306604	0.528302	0.743711	0.996855	0.319182	0.006289	0.674528	0	0.119685	0.006299	0.001572	0.083333	0.371069	0.68239	1	0.528302	0.528302	0.949686	0.951258	0.95283	0.012579	0.289308	0.556604	0.759434	0.996855	0.512579	0.381102	0.006289	0.306604	0.561321	0.764151	0.996855	0.404088
0.300813	0.439024	0.260163	0.286885	0.147541	0.254098	0.02439	0.235772	0.544715	0.715447	1	0.01626	0.195122	0.430894	0.772358	0.99187	0.00813	0.268293	0.487805	0.739837	0.98374	0.373984	0.138211	0.487805	0.04918	0.081967	0	0.00813	0.195122	0.341463	0.691057	1	0.260163	0.284553	0.422764	0.455285	0.764228	0.065041	0.479675	0.601626	0.869919	0.99187	0.471545	0.377049	0.04878	0.292683	0.495935	0.731707	0.98374	0.447154
0.463087	0.288591	0.248322	0.236486	0.243243	0.128378	0.013423	0.261745	0.510067	0.838926	1	0.026846	0.201342	0.52349	0.66443	0.986577	0.006711	0.241611	0.449664	0.644295	0.865772	0.422819	0.248322	0.328859	0.128378	0.087838	0.02027	0.006711	0.288591	0.496644	0.731544	1	0.026846	0.348993	0.463087	0.57047	0.838926	0.060403	0.154362	0.657718	0.805369	0.979866	0.315436	0.364865	0.114094	0.302013	0.47651	0.651007	0.946309	0.275168
0.370272	0.412077	0.217651	0.255644	0.168659	0.177291	0.003318	0.261447	0.510949	0.770405	1	0.001327	0.252157	0.457863	0.704048	0.998673	0.000664	0.209025	0.520239	0.816191	0.999336	0.668879	0.140013	0.191108	0.058433	0.045153	0.002656	0.000664	0.266092	0.473789	0.74718	1	0.063703	0.275382	0.613139	0.909091	0.984074	0.022561	0.151958	0.50365	0.631055	0.996682	0.364964	0.353254	0.003981	0.187127	0.522893	0.826145	0.999336	0.419376
0.423729	0.262712	0.313559	0.196581	0.316239	0.196581	0.016949	0.211864	0.516949	0.720339	0.991525	0.042373	0.245763	0.457627	0.754237	0.974576	0.008475	0.237288	0.449153	0.745763	1	0.338983	0.220339	0.440678	0.08547	0.068376	0	0.008475	0.220339	0.533898	0.805085	1	0.228814	0.271186	0.355932	0.440678	0.847458	0.033898	0.135593	0.601695	0.711864	0.957627	0.423729	0.25641	0.127119	0.322034	0.474576	0.788136	0.983051	0.29661
0.340836	0.363344	0.29582	0.245161	0.183871	0.2	0.009646	0.308682	0.578778	0.778135	1	0.006431	0.167203	0.434084	0.649518	0.996785	0.003215	0.276527	0.517685	0.77492	0.990354	0.421222	0.221865	0.356913	0.077419	0.058065	0	0.003215	0.167203	0.44373	0.649518	1	0.051447	0.196141	0.418006	0.755627	0.945338	0.096463	0.366559	0.572347	0.829582	0.983923	0.546624	0.335484	0.054662	0.237942	0.472669	0.726688	0.990354	0.379421
0.35119	0.392857	0.255952	0.250373	0.187779	0.183308	0.005952	0.25744	0.488095	0.738095	0.985119	0.004464	0.241071	0.525298	0.779762	1	0.001488	0.25	0.467262	0.699405	0.998512	0.64881	0.169643	0.181548	0.065574	0.068554	0	0.001488	0.27381	0.544643	0.809524	1	0.052083	0.18006	0.333333	0.540179	0.885417	0.06994	0.306548	0.495536	0.696429	0.973214	0.508929	0.354694	0.00744	0.315476	0.592262	0.808036	0.994048	0.388393
0.281065	0.517751	0.201183	0.275903	0.119597	0.209591	0.004142	0.259172	0.489941	0.708284	0.998817	0.001183	0.230178	0.471006	0.759172	0.999408	0.000592	0.284615	0.577515	0.784615	1	0.878698	0.026627	0.094675	0.022499	0.023683	0.001184	0.000592	0.233136	0.457396	0.736686	1	0.03787	0.100592	0.606509	0.912426	0.935503	0.065089	0.663905	0.701183	0.897041	0.992308	0.491716	0.359976	0.007692	0.195266	0.512426	0.786391	0.997041	0.535503
0.323232	0.373737	0.30303	0.233503	0.182741	0.243655	0.010101	0.227273	0.515152	0.80303	0.969697	0.10101	0.292929	0.520202	0.732323	0.994949	0.005051	0.151515	0.414141	0.671717	1	0.575758	0.161616	0.262626	0.055838	0.06599	0.015228	0.005051	0.313131	0.580808	0.828283	1	0.025253	0.060606	0.277778	0.343434	0.459596	0.080808	0.146465	0.570707	0.737374	0.893939	0.565657	0.324873	0.025253	0.20202	0.40404	0.616162	0.984848	0.348485
0.35206	0.460674	0.187266	0.409774	0.120301	0.139098	0.007491	0.325843	0.550562	0.741573	1	0.011236	0.254682	0.565543	0.794007	0.985019	0.003745	0.116105	0.292135	0.426966	0.996255	0.745318	0.108614	0.146067	0.045113	0.022556	0	0.003745	0.430712	0.625468	0.812734	1	0.153558	0.250936	0.29588	0.389513	0.509363	0.033708	0.06367	0.101124	0.23221	0.355805	0.284644	0.195489	0.033708	0.101124	0.247191	0.404494	0.94382	0.464419
0.332308	0.317692	0.35	0.212471	0.237875	0.220169	0.001538	0.27	0.506154	0.75	1	0.007692	0.245385	0.503846	0.756154	0.999231	0.000769	0.224615	0.49	0.743077	0.996923	0.489231	0.393077	0.117692	0.126251	0.038491	0.009238	0.000769	0.256154	0.478462	0.717692	1	0.009231	0.209231	0.473846	0.738462	0.925385	0.002308	0.314615	0.571538	0.952308	0.996923	0.620769	0.292533	0.002308	0.251538	0.500769	0.745385	0.997692	0.333077
0.388158	0.282895	0.328947	0.208791	0.261538	0.18022	0.004386	0.256579	0.508772	0.780702	0.997807	0.017544	0.22807	0.482456	0.717105	1	0.002193	0.258772	0.486842	0.734649	0.995614	0.385965	0.184211	0.429825	0.076923	0.09011	0.002198	0.002193	0.298246	0.513158	0.758772	1	0.100877	0.254386	0.526316	0.774123	0.949561	0.006579	0.199561	0.440789	0.701754	0.989035	0.541667	0.408791	0.006579	0.267544	0.482456	0.717105	0.995614	0.285088
0.592357	0.269639	0.138004	0.261702	0.123404	0.095745	0.006369	0.350318	0.58811	0.781316	1	0.004246	0.195329	0.358811	0.677282	0.995754	0.002123	0.142251	0.284501	0.666667	0.997877	0.783439	0.063694	0.152866	0.025532	0.038298	0	0.002123	0.390658	0.592357	0.796178	1	0.220807	0.278132	0.316348	0.36518	0.974522	0.014862	0.133758	0.171975	0.333333	0.855626	0.195329	0.187234	0.010616	0.127389	0.286624	0.403397	0.993631	0.346072
0.385827	0.254593	0.35958	0.184211	0.305263	0.194737	0.005249	0.199475	0.493438	0.748031	0.994751	0.018373	0.312336	0.496063	0.771654	0.965879	0.002625	0.233596	0.480315	0.716535	1	0.367454	0.24147	0.391076	0.073684	0.073684	0	0.002625	0.330709	0.553806	0.83727	1	0.007874	0.146982	0.39895	0.511811	0.860892	0.065617	0.265092	0.598425	0.748031	0.989501	0.606299	0.421053	0.010499	0.270341	0.519685	0.740157	0.992126	0.275591
0.516854	0.235955	0.247191	0.220339	0.231638	0.135593	0.022472	0.303371	0.550562	0.808989	0.988764	0.011236	0.191011	0.432584	0.719101	1	0.005618	0.174157	0.410112	0.657303	0.994382	0.353933	0.095506	0.550562	0.045198	0.101695	0	0.005618	0.08427	0.460674	0.769663	1	0.404494	0.421348	0.44382	0.483146	0.870787	0.117978	0.264045	0.567416	0.758427	0.977528	0.410112	0.440678	0.039326	0.224719	0.432584	0.606742	0.960674	0.230337
0.409449	0.259843	0.330709	0.209486	0.300395	0.16996	0.007874	0.30315	0.480315	0.80315	1	0.019685	0.181102	0.523622	0.700787	0.952756	0.003937	0.244094	0.5	0.724409	0.988189	0.275591	0.279528	0.444882	0.071146	0.063241	0.007905	0.003937	0.133858	0.448819	0.728346	1	0.047244	0.122047	0.299213	0.807087	0.996063	0.169291	0.401575	0.531496	0.748031	0.96063	0.472441	0.474308	0.023622	0.244094	0.515748	0.744094	0.988189	0.26378
0.42953	0.278523	0.291946	0.23569	0.272727	0.16835	0.02349	0.308725	0.533557	0.704698	1	0.006711	0.167785	0.385906	0.788591	0.996644	0.003356	0.218121	0.489933	0.771812	0.993289	0.45302	0.137584	0.409396	0.070707	0.077441	0.003367	0.003356	0.177852	0.446309	0.731544	1	0.010067	0.211409	0.768456	0.88255	0.993289	0.053691	0.302013	0.5	0.61745	0.942953	0.426174	0.383838	0.013423	0.211409	0.40604	0.778523	0.993289	0.281879
0.446629	0.407303	0.146067	0.340845	0.152113	0.070423	0.005618	0.244382	0.511236	0.747191	1	0.008427	0.303371	0.578652	0.780899	0.994382	0.002809	0.109551	0.283708	0.438202	0.966292	0.713483	0.16573	0.120787	0.067606	0.028169	0	0.002809	0.342697	0.623596	0.803371	1	0.008427	0.115169	0.345506	0.435393	0.932584	0.042135	0.067416	0.154494	0.393258	0.783708	0.300562	0.321127	0.011236	0.154494	0.370787	0.58427	0.974719	0.426966
0.359551	0.292135	0.348315	0.204545	0.295455	0.204545	0.022472	0.213483	0.561798	0.696629	0.988764	0.033708	0.280899	0.494382	0.808989	0.966292	0.011236	0.179775	0.438202	0.730337	1	0.460674	0.483146	0.05618	0.136364	0.022727	0	0.011236	0.235955	0.561798	0.797753	1	0.168539	0.314607	0.494382	0.730337	0.988764	0.067416	0.067416	0.078652	0.089888	0.11236	0.483146	0.272727	0.044944	0.213483	0.426966	0.741573	0.876404	0.370787
0.336	0.4192	0.2448	0.258013	0.152244	0.189103	0.0144	0.2976	0.5424	0.7664	0.9984	0.0032	0.2576	0.592	0.8224	1	0.0016	0.2096	0.3584	0.5344	0.9408	0.5872	0.1152	0.2976	0.041667	0.076923	0.003205	0.0016	0.2896	0.6848	0.8432	1	0.1216	0.2576	0.4016	0.5264	0.6048	0.016	0.1872	0.3648	0.536	0.9952	0.4032	0.307692	0.0192	0.2176	0.3776	0.5568	0.976	0.4192
0.485327	0.24605	0.268623	0.210407	0.223982	0.153846	0.004515	0.27991	0.474041	0.659142	0.997743	0.018059	0.227991	0.553047	0.812641	1	0.002257	0.187359	0.514673	0.808126	0.988713	0.638826	0.158014	0.20316	0.074661	0.061086	0.002262	0.002257	0.295711	0.476298	0.668172	1	0.013544	0.137698	0.512415	0.873589	0.977427	0.065463	0.17833	0.670429	0.767494	0.943567	0.525959	0.38009	0.011287	0.320542	0.512415	0.690745	0.975169	0.21219
0.375723	0.323699	0.300578	0.209302	0.226744	0.186047	0.011561	0.283237	0.462428	0.716763	1	0.075145	0.242775	0.554913	0.797688	0.976879	0.00578	0.225434	0.468208	0.728324	0.99422	0.352601	0.254335	0.393064	0.098837	0.063953	0.017442	0.00578	0.190751	0.520231	0.693642	1	0.023121	0.219653	0.531792	0.774566	0.855491	0.052023	0.294798	0.393064	0.710983	0.99422	0.346821	0.418605	0.028902	0.184971	0.479769	0.705202	0.901734	0.33526
0.368564	0.317073	0.314363	0.222343	0.241866	0.204989	0.001626	0.268293	0.523035	0.736585	0.996206	0.003252	0.267751	0.507859	0.754472	0.999458	0.000542	0.211924	0.461247	0.755556	1	0.511111	0.102981	0.385908	0.045553	0.075922	0.003254	0.000542	0.333333	0.559892	0.762602	1	0.001084	0.124661	0.370732	0.539295	0.980488	0.007588	0.182114	0.463415	0.814092	0.995122	0.523035	0.367679	0.002168	0.239566	0.481843	0.755556	0.998374	0.345257
0.310087	0.315068	0.374844	0.190773	0.269327	0.24813	0.002491	0.234122	0.486924	0.740971	1	0.004981	0.265255	0.499377	0.752179	0.996264	0.001245	0.250311	0.496887	0.742217	0.998755	0.466999	0.242839	0.290162	0.100998	0.05611	0.003741	0.001245	0.231631	0.460772	0.737235	1	0.038605	0.200498	0.420922	0.803238	0.998755	0.006227	0.32005	0.542964	0.703611	0.992528	0.570361	0.408978	0.003736	0.255293	0.473225	0.726027	0.998755	0.303861
0.390244	0.280488	0.329268	0.17284	0.308642	0.197531	0.02439	0.280488	0.597561	0.792683	1	0.073171	0.170732	0.329268	0.560976	0.902439	0.012195	0.256098	0.47561	0.731707	0.963415	0.634146	0.268293	0.097561	0.123457	0.024691	0	0.012195	0.231707	0.52439	0.841463	1	0.134146	0.182927	0.304878	0.426829	0.621951	0.682927	0.695122	0.719512	0.743902	0.768293	0.353659	0.395062	0.060976	0.268293	0.45122	0.54878	0.804878	0.304878
0.377301	0.325153	0.297546	0.230769	0.24	0.193846	0.006135	0.193252	0.466258	0.708589	1	0.039877	0.349693	0.576687	0.779141	0.996933	0.003067	0.236196	0.444785	0.693252	0.978528	0.53681	0.263804	0.199387	0.104615	0.055385	0.012308	0.003067	0.251534	0.466258	0.754601	1	0.042945	0.312883	0.555215	0.702454	0.935583	0.067485	0.138037	0.503067	0.846626	0.98773	0.503067	0.356923	0.042945	0.343558	0.527607	0.757669	0.978528	0.315951
0.34058	0.492754	0.166667	0.319613	0.138015	0.145278	0.007246	0.202899	0.456522	0.676329	1	0.004831	0.243961	0.57971	0.821256	0.997585	0.002415	0.318841	0.442029	0.591787	0.7657	0.751208	0.130435	0.118357	0.048426	0.033898	0	0.002415	0.202899	0.543478	0.811594	1	0.304348	0.386473	0.463768	0.560386	0.657005	0.007246	0.342995	0.42029	0.533816	0.678744	0.429952	0.343826	0.009662	0.376812	0.60628	0.799517	0.968599	0.463768
0.361963	0.343558	0.294479	0.185185	0.185185	0.265432	0.018405	0.190184	0.429448	0.668712	0.98773	0.01227	0.263804	0.582822	0.785276	1	0.006135	0.257669	0.546012	0.766871	0.981595	0.361963	0.104294	0.533742	0.037037	0.08642	0	0.006135	0.08589	0.263804	0.674847	1	0.527607	0.546012	0.705521	0.822086	0.852761	0.122699	0.337423	0.478528	0.760736	0.98773	0.460123	0.358025	0.03681	0.361963	0.588957	0.754601	0.97546	0.349693
0.336788	0.357513	0.305699	0.270833	0.25	0.223958	0.015544	0.202073	0.476684	0.746114	0.994819	0.010363	0.243523	0.466321	0.725389	1	0.005181	0.274611	0.497409	0.735751	0.927461	0.440415	0.450777	0.108808	0.125	0.03125	0	0.005181	0.238342	0.590674	0.839378	1	0.020725	0.331606	0.497409	0.678756	0.932642	0.093264	0.11399	0.248705	0.274611	0.715026	0.440415	0.479167	0.025907	0.274611	0.476684	0.704663	0.937824	0.378238
0.34375	0.330357	0.325893	0.215247	0.282511	0.206278	0.017857	0.245536	0.477679	0.799107	1	0.008929	0.200893	0.513393	0.709821	0.995536	0.004464	0.254464	0.482143	0.705357	0.9375	0.459821	0.379464	0.160714	0.116592	0.06278	0.008969	0.004464	0.325893	0.629464	0.821429	1	0.022321	0.209821	0.424107	0.607143	0.857143	0.089286	0.125	0.272321	0.732143	0.924107	0.40625	0.430493	0.026786	0.25	0.4375	0.651786	0.9375	0.370536
0.441057	0.306911	0.252033	0.295316	0.203666	0.120163	0.012195	0.319106	0.591463	0.808943	1	0.004065	0.213415	0.473577	0.772358	0.997967	0.002033	0.191057	0.400407	0.581301	0.945122	0.593496	0.168699	0.237805	0.077393	0.077393	0	0.002033	0.231707	0.50813	0.794715	1	0.004065	0.189024	0.319106	0.581301	0.857724	0.046748	0.373984	0.520325	0.780488	0.989837	0.373984	0.321792	0.006098	0.150407	0.337398	0.573171	0.945122	0.357724
0.349593	0.406504	0.243902	0.226069	0.181263	0.189409	0.006098	0.21748	0.481707	0.697154	0.993902	0.004065	0.270325	0.565041	0.778455	0.995935	0.002033	0.268293	0.455285	0.711382	1	0.603659	0.103659	0.292683	0.03666	0.089613	0.004073	0.002033	0.221545	0.518293	0.776423	1	0.030488	0.26626	0.380081	0.528455	0.955285	0.028455	0.24187	0.449187	0.713415	0.932927	0.392276	0.362525	0.028455	0.24187	0.46748	0.73374	0.997967	0.418699
0.323944	0.341549	0.334507	0.183746	0.222615	0.268551	0.010563	0.34507	0.542254	0.795775	1	0.007042	0.190141	0.380282	0.679577	0.989437	0.003521	0.214789	0.528169	0.753521	0.996479	0.475352	0.179577	0.34507	0.056537	0.070671	0.007067	0.003521	0.302817	0.59507	0.84507	1	0.010563	0.070423	0.228873	0.56338	0.883803	0.098592	0.278169	0.454225	0.725352	0.975352	0.507042	0.438163	0.014085	0.207746	0.433099	0.683099	0.985915	0.352113
0.344643	0.403571	0.251786	0.26297	0.168157	0.187835	0.005357	0.276786	0.457143	0.721429	1	0.003571	0.219643	0.508929	0.767857	0.998214	0.001786	0.298214	0.516071	0.744643	0.991071	0.551786	0.164286	0.283929	0.069767	0.069767	0.0161	0.001786	0.216071	0.423214	0.705357	1	0.132143	0.194643	0.475	0.798214	0.951786	0.005357	0.417857	0.521429	0.735714	0.994643	0.451786	0.368515	0.025	0.296429	0.542857	0.771429	0.991071	0.403571
0.359929	0.41844	0.221631	0.309059	0.152753	0.179396	0.005319	0.274823	0.489362	0.696809	0.996454	0.003546	0.265957	0.512411	0.72695	1	0.001773	0.189716	0.446809	0.810284	0.992908	0.638298	0.171986	0.189716	0.065719	0.044405	0.005329	0.001773	0.317376	0.491135	0.656028	1	0.019504	0.147163	0.324468	0.812057	0.994681	0.04078	0.191489	0.693262	0.886525	0.978723	0.379433	0.294849	0.01773	0.230496	0.402482	0.803191	0.994681	0.409574
0.352181	0.318255	0.329564	0.223301	0.221683	0.197411	0.008078	0.232633	0.516963	0.77706	1	0.006462	0.197092	0.439418	0.736672	0.996769	0.001616	0.311793	0.53958	0.731826	0.983845	0.49273	0.163166	0.344103	0.063107	0.079288	0.004854	0.001616	0.159935	0.336026	0.647819	1	0.009693	0.308562	0.568659	0.728595	0.886914	0.077544	0.415186	0.599354	0.817447	0.995153	0.508885	0.355987	0.009693	0.345719	0.523425	0.731826	0.988691	0.360258
0.392694	0.307458	0.299848	0.243902	0.22561	0.193598	0.018265	0.304414	0.5586	0.785388	0.998478	0.003044	0.200913	0.462709	0.724505	1	0.001522	0.21309	0.459665	0.704718	0.987823	0.445967	0.028919	0.525114	0.01372	0.105183	0.001524	0.001522	0.296804	0.519026	0.774734	1	0.266362	0.270928	0.283105	0.452055	0.916286	0.016743	0.208524	0.494673	0.741248	0.987823	0.4414	0.39939	0.012177	0.222222	0.462709	0.710807	0.987823	0.340944
0.327125	0.37369	0.299185	0.216783	0.216783	0.201632	0.003492	0.288708	0.537835	0.76135	0.995343	0.006985	0.19092	0.521537	0.777648	1	0.001164	0.285215	0.461001	0.648428	0.998836	0.59837	0.017462	0.384168	0.01049	0.064103	0.001166	0.001164	0.152503	0.580908	0.83702	1	0.250291	0.252619	0.431898	0.778813	0.9383	0.096624	0.351572	0.488941	0.610012	0.859139	0.57858	0.428904	0.002328	0.195576	0.434226	0.67404	0.998836	0.370198
0.329258	0.380786	0.289956	0.246503	0.181818	0.222028	0.004367	0.230568	0.510044	0.719651	0.998253	0.001747	0.273362	0.50393	0.777293	0.999127	0.000873	0.256769	0.478603	0.737991	1	0.464629	0.126638	0.408734	0.050699	0.082168	0.003497	0.000873	0.215721	0.50131	0.761572	1	0.039301	0.28821	0.396507	0.669869	0.988646	0.020087	0.259389	0.527511	0.764192	0.99738	0.526638	0.358392	0.017467	0.254148	0.468996	0.71441	0.993886	0.401747
0.299383	0.37037	0.330247	0.210526	0.213622	0.216718	0.012346	0.283951	0.512346	0.762346	1	0.006173	0.20679	0.478395	0.728395	0.987654	0.003086	0.256173	0.453704	0.746914	0.993827	0.444444	0.216049	0.339506	0.065015	0.058824	0.003096	0.003086	0.169753	0.435185	0.651235	1	0.012346	0.231481	0.447531	0.759259	0.938272	0.021605	0.395062	0.589506	0.82716	0.975309	0.540123	0.334365	0.009259	0.262346	0.490741	0.737654	0.987654	0.361111
0.363208	0.34434	0.292453	0.232227	0.255924	0.194313	0.014151	0.245283	0.462264	0.740566	1	0.009434	0.20283	0.533019	0.787736	0.990566	0.004717	0.259434	0.471698	0.698113	0.896226	0.415094	0.410377	0.174528	0.127962	0.052133	0.004739	0.004717	0.221698	0.551887	0.783019	1	0.028302	0.311321	0.471698	0.688679	0.896226	0.09434	0.226415	0.485849	0.665094	0.981132	0.40566	0.473934	0.033019	0.245283	0.448113	0.669811	0.90566	0.367925
0.295597	0.399371	0.305031	0.189274	0.192429	0.258675	0.015723	0.204403	0.525157	0.779874	1	0.006289	0.261006	0.522013	0.786164	0.996855	0.003145	0.22956	0.462264	0.654088	0.918239	0.45283	0.157233	0.389937	0.053628	0.085174	0.003155	0.003145	0.191824	0.443396	0.713836	1	0.015723	0.27673	0.424528	0.606918	0.688679	0.012579	0.248428	0.522013	0.795597	0.933962	0.506289	0.410095	0.009434	0.245283	0.462264	0.650943	0.927673	0.424528
0.246753	0.470779	0.282468	0.214984	0.162866	0.276873	0.00974	0.237013	0.535714	0.766234	0.996753	0.006494	0.25974	0.483766	0.720779	1	0.003247	0.230519	0.474026	0.743506	0.987013	0.512987	0.288961	0.198052	0.114007	0.04886	0.009772	0.003247	0.246753	0.49026	0.75974	1	0.00974	0.279221	0.558442	0.727273	0.941558	0.035714	0.107143	0.396104	0.532468	0.993506	0.522727	0.371336	0.019481	0.327922	0.522727	0.75974	0.987013	0.461039
0.369697	0.377778	0.252525	0.251012	0.198381	0.192308	0.00404	0.242424	0.547475	0.761616	0.99798	0.006061	0.193939	0.460606	0.747475	1	0.00202	0.29697	0.474747	0.731313	0.987879	0.517172	0.080808	0.40202	0.038462	0.082996	0.010121	0.00202	0.157576	0.432323	0.777778	1	0.076768	0.276768	0.39596	0.60202	0.672727	0.008081	0.361616	0.541414	0.765657	0.989899	0.448485	0.417004	0.014141	0.270707	0.466667	0.668687	0.987879	0.448485
0.338028	0.28169	0.380282	0.242857	0.257143	0.242857	0.042254	0.309859	0.605634	0.71831	1	0.028169	0.183099	0.394366	0.704225	0.929577	0.014085	0.197183	0.450704	0.774648	0.985915	0.43662	0.309859	0.253521	0.171429	0.057143	0.028571	0.014085	0.323944	0.591549	0.760563	1	0.056338	0.169014	0.633803	0.84507	0.985915	0.140845	0.211268	0.28169	0.422535	0.492958	0.380282	0.514286	0.070423	0.211268	0.394366	0.746479	0.985915	0.323944
0.36612	0.273224	0.360656	0.192308	0.296703	0.192308	0.016393	0.256831	0.47541	0.759563	1	0.027322	0.169399	0.437158	0.639344	0.934426	0.005464	0.31694	0.562842	0.781421	0.994536	0.420765	0.42623	0.153005	0.137363	0.049451	0.005495	0.005464	0.213115	0.540984	0.814208	1	0.027322	0.344262	0.508197	0.710383	0.994536	0.103825	0.136612	0.289617	0.644809	0.879781	0.448087	0.494505	0.032787	0.278689	0.502732	0.748634	0.994536	0.311475
0.376923	0.269231	0.353846	0.185328	0.285714	0.204633	0.007692	0.219231	0.461538	0.715385	0.992308	0.015385	0.273077	0.526923	0.753846	1	0.003846	0.265385	0.511538	0.75	0.980769	0.25	0.065385	0.684615	0.019305	0.104247	0.011583	0.003846	0.284615	0.696154	0.823077	1	0.711538	0.753846	0.792308	0.807692	0.919231	0.015385	0.207692	0.411538	0.603846	0.984615	0.492308	0.416988	0.011538	0.253846	0.488462	0.734615	0.965385	0.273077
0.406667	0.246667	0.346667	0.174497	0.261745	0.187919	0.013333	0.28	0.446667	0.7	1	0.066667	0.253333	0.52	0.813333	0.993333	0.006667	0.193333	0.48	0.753333	0.946667	0.36	0.306667	0.333333	0.127517	0.04698	0.006711	0.006667	0.16	0.573333	0.78	1	0.013333	0.24	0.6	0.853333	0.953333	0.053333	0.3	0.386667	0.466667	0.686667	0.373333	0.456376	0.02	0.2	0.526667	0.706667	0.946667	0.253333
0.335165	0.412088	0.252747	0.331492	0.165746	0.20442	0.027473	0.192308	0.423077	0.664835	0.994505	0.016484	0.291209	0.587912	0.840659	1	0.005495	0.225275	0.456044	0.631868	0.989011	0.587912	0.175824	0.236264	0.077348	0.044199	0	0.005495	0.208791	0.483516	0.807692	1	0.043956	0.357143	0.516484	0.576923	0.747253	0.17033	0.258242	0.318681	0.67033	0.912088	0.423077	0.375691	0.049451	0.258242	0.412088	0.593407	0.972527	0.417582
0.352227	0.340081	0.307692	0.272358	0.223577	0.178862	0.020243	0.263158	0.550607	0.805668	0.995951	0.02834	0.251012	0.510121	0.757085	1	0.004049	0.190283	0.421053	0.688259	0.967611	0.437247	0.182186	0.380567	0.056911	0.065041	0.00813	0.004049	0.364372	0.753036	0.874494	1	0.133603	0.190283	0.340081	0.578947	0.834008	0.016194	0.105263	0.404858	0.566802	0.983806	0.425101	0.406504	0.032389	0.226721	0.449393	0.623482	0.967611	0.299595
0.407767	0.237864	0.354369	0.136585	0.35122	0.165854	0.014563	0.237864	0.466019	0.752427	0.995146	0.019417	0.218447	0.485437	0.631068	0.985437	0.004854	0.291262	0.524272	0.76699	1	0.461165	0.169903	0.368932	0.068293	0.087805	0.019512	0.004854	0.145631	0.504854	0.699029	1	0.218447	0.291262	0.616505	0.936893	0.980583	0.038835	0.330097	0.436893	0.73301	0.912621	0.475728	0.419512	0.019417	0.354369	0.514563	0.752427	0.980583	0.208738
0.341463	0.296167	0.362369	0.192308	0.22028	0.255245	0.006969	0.261324	0.519164	0.770035	0.993031	0.017422	0.195122	0.466899	0.724739	0.996516	0.003484	0.296167	0.512195	0.735192	1	0.400697	0.236934	0.362369	0.076923	0.055944	0	0.003484	0.191638	0.452962	0.658537	1	0.020906	0.1777	0.421603	0.801394	0.982578	0.069686	0.362369	0.567944	0.839721	0.933798	0.581882	0.328671	0.017422	0.212544	0.442509	0.71777	0.982578	0.264808
0.44	0.313333	0.246667	0.322148	0.194631	0.134228	0.013333	0.253333	0.52	0.78	1	0.026667	0.286667	0.593333	0.813333	0.953333	0.006667	0.153333	0.366667	0.54	0.946667	0.473333	0.233333	0.293333	0.100671	0.073826	0.006711	0.006667	0.266667	0.64	0.866667	1	0.026667	0.22	0.353333	0.686667	0.92	0.093333	0.16	0.473333	0.56	0.86	0.346667	0.268456	0.026667	0.173333	0.373333	0.54	0.946667	0.3
0.423913	0.336957	0.23913	0.351648	0.186813	0.175824	0.032609	0.195652	0.434783	0.728261	1	0.021739	0.173913	0.413043	0.695652	0.934783	0.01087	0.358696	0.521739	0.804348	0.978261	0.597826	0.032609	0.369565	0.043956	0.043956	0	0.01087	0.141304	0.293478	0.554348	1	0.380435	0.380435	0.380435	0.391304	0.586957	0.445652	0.521739	0.782609	0.869565	0.967391	0.358696	0.395604	0.130435	0.434783	0.597826	0.804348	0.934783	0.347826
0.3674	0.373868	0.258732	0.244819	0.190415	0.203368	0.002587	0.27555	0.535576	0.76326	0.998706	0.003881	0.201811	0.447607	0.719276	0.996119	0.001294	0.26132	0.543338	0.773609	1	0.597671	0.142303	0.260026	0.069948	0.059585	0.002591	0.001294	0.194049	0.429495	0.654592	1	0.060802	0.401035	0.635188	0.791721	0.997413	0.021992	0.344114	0.609314	0.873221	0.968952	0.394567	0.375648	0.012937	0.218629	0.454075	0.736093	0.997413	0.411384
0.254902	0.511765	0.233333	0.227898	0.129666	0.206287	0.015686	0.207843	0.427451	0.727451	0.996078	0.005882	0.288235	0.562745	0.74902	1	0.001961	0.231373	0.464706	0.713725	0.998039	0.631373	0.133333	0.235294	0.05501	0.047151	0.003929	0.001961	0.25098	0.498039	0.698039	1	0.098039	0.166667	0.372549	0.837255	0.937255	0.013725	0.392157	0.641176	0.878431	0.988235	0.511765	0.369352	0.005882	0.307843	0.564706	0.72549	0.992157	0.509804
0.405063	0.348101	0.246835	0.282092	0.196513	0.169572	0.003165	0.261076	0.52057	0.787975	0.995253	0.015823	0.280063	0.572785	0.781646	1	0.001582	0.199367	0.39557	0.620253	0.998418	0.530063	0.183544	0.286392	0.07607	0.050713	0.006339	0.001582	0.273734	0.617089	0.848101	1	0.007911	0.129747	0.27057	0.504747	0.993671	0.123418	0.299051	0.427215	0.661392	0.898734	0.463608	0.399366	0.006329	0.223101	0.43038	0.670886	0.993671	0.375
0.411765	0.285714	0.302521	0.271186	0.245763	0.169492	0.042017	0.252101	0.546218	0.697479	1	0.02521	0.243697	0.521008	0.789916	0.941176	0.008403	0.210084	0.420168	0.722689	0.983193	0.428571	0.243697	0.327731	0.084746	0.067797	0	0.008403	0.184874	0.462185	0.647059	1	0.243697	0.294118	0.394958	0.470588	0.554622	0.067227	0.134454	0.747899	0.865546	0.983193	0.411765	0.474576	0.05042	0.268908	0.478992	0.739496	0.97479	0.327731
0.300752	0.330827	0.368421	0.212121	0.181818	0.242424	0.045113	0.263158	0.443609	0.646617	0.954887	0.015038	0.225564	0.578947	0.774436	0.947368	0.007519	0.24812	0.458647	0.744361	1	0.353383	0.360902	0.285714	0.174242	0.05303	0.007576	0.007519	0.330827	0.56391	0.729323	1	0.18797	0.398496	0.541353	0.81203	0.992481	0.037594	0.097744	0.255639	0.323308	0.917293	0.466165	0.424242	0.030075	0.233083	0.556391	0.789474	0.992481	0.293233
0.33564	0.422145	0.242215	0.260417	0.163194	0.215278	0.010381	0.269896	0.463668	0.747405	0.979239	0.00692	0.221453	0.543253	0.820069	1	0.00346	0.242215	0.487889	0.67474	0.989619	0.519031	0.190311	0.290657	0.083333	0.055556	0	0.00346	0.214533	0.543253	0.844291	1	0.013841	0.16263	0.346021	0.643599	0.99308	0.107266	0.304498	0.508651	0.712803	0.816609	0.449827	0.354167	0.017301	0.259516	0.574394	0.747405	0.989619	0.453287
0.291762	0.429062	0.279176	0.262314	0.167239	0.239404	0.005721	0.24714	0.528604	0.772311	1	0.002288	0.273455	0.491991	0.749428	0.997712	0.001144	0.226545	0.482838	0.696796	0.998856	0.575515	0.114416	0.310069	0.04811	0.064147	0.004582	0.001144	0.265446	0.52746	0.757437	1	0.004577	0.138444	0.41762	0.59611	0.966819	0.049199	0.215103	0.5	0.726545	0.997712	0.456522	0.318442	0.004577	0.243707	0.5	0.718535	0.998856	0.467963
0.408935	0.305842	0.285223	0.208262	0.277108	0.163511	0.006873	0.218213	0.498282	0.721649	0.994845	0.003436	0.249141	0.544674	0.852234	0.998282	0.001718	0.276632	0.465636	0.689003	1	0.503436	0.121993	0.37457	0.043029	0.08778	0.008606	0.001718	0.281787	0.546392	0.852234	1	0.072165	0.295533	0.333333	0.699313	0.969072	0.013746	0.176976	0.455326	0.627148	0.967354	0.439863	0.371773	0.022337	0.30756	0.494845	0.702749	0.984536	0.353952
0.375	0.267857	0.357143	0.16129	0.265233	0.261649	0.007143	0.192857	0.428571	0.703571	1	0.032143	0.282143	0.546429	0.764286	0.996429	0.003571	0.275	0.510714	0.75	0.992857	0.271429	0.096429	0.632143	0.032258	0.082437	0.003584	0.003571	0.139286	0.510714	0.775	1	0.010714	0.039286	0.078571	0.107143	0.175	0.142857	0.357143	0.564286	0.767857	0.985714	0.517857	0.394265	0.010714	0.271429	0.510714	0.739286	0.975	0.271429
0.257143	0.508163	0.234694	0.243354	0.149284	0.204499	0.012245	0.308163	0.563265	0.791837	0.993878	0.006122	0.222449	0.495918	0.718367	1	0.002041	0.238776	0.428571	0.773469	0.989796	0.687755	0.055102	0.257143	0.03681	0.04908	0.00409	0.002041	0.216327	0.504082	0.710204	1	0.059184	0.108163	0.226531	0.240816	0.708163	0.077551	0.365306	0.565306	0.908163	0.981633	0.469388	0.368098	0.008163	0.222449	0.495918	0.67551	0.989796	0.508163
0.326087	0.23913	0.434783	0.120879	0.318681	0.21978	0.021739	0.141304	0.423913	0.684783	0.956522	0.184783	0.304348	0.554348	0.804348	1	0.01087	0.195652	0.48913	0.73913	0.978261	0.163043	0	0.836957	0	0.10989	0	0.01087	0.184783	0.315217	0.847826	1	0	0	0	0	0	0.032609	0.26087	0.48913	0.717391	0.967391	0.630435	0.43956	0.043478	0.271739	0.532609	0.728261	0.978261	0.23913
0.355694	0.297972	0.346334	0.173437	0.239063	0.23125	0.0078	0.24337	0.471139	0.769111	0.99532	0.00468	0.25117	0.519501	0.703588	1	0.00156	0.24805	0.50858	0.764431	0.99844	0.308892	0.102964	0.588144	0.0375	0.084375	0.003125	0.00156	0.266771	0.541342	0.795632	1	0.082683	0.232449	0.687988	0.865835	0.926677	0.00624	0.25273	0.444618	0.664587	0.9922	0.51014	0.415625	0.00312	0.25741	0.514821	0.74103	0.99064	0.318253
0.368932	0.300971	0.330097	0.205882	0.245098	0.205882	0.029126	0.252427	0.475728	0.728155	0.980583	0.048544	0.203883	0.533981	0.757282	0.902913	0.009709	0.15534	0.495146	0.679612	1	0.427184	0.330097	0.242718	0.117647	0.039216	0.019608	0.009709	0.271845	0.640777	0.815534	1	0.116505	0.320388	0.592233	0.708738	0.970874	0.07767	0.194175	0.252427	0.436893	0.504854	0.359223	0.411765	0.038835	0.15534	0.339806	0.572816	0.970874	0.291262
0.352554	0.31631	0.331137	0.19637	0.239274	0.219472	0.003295	0.265239	0.518946	0.818781	0.998353	0.016474	0.243822	0.500824	0.708402	0.99341	0.001647	0.230643	0.469522	0.705107	1	0.490939	0.169687	0.339374	0.061056	0.064356	0.00495	0.001647	0.248764	0.52883	0.759473	1	0.031301	0.23888	0.444811	0.546952	0.869852	0.008237	0.261944	0.589786	0.820428	0.996705	0.439868	0.333333	0.011532	0.217463	0.500824	0.688633	0.995058	0.350906
0.433628	0.230088	0.336283	0.223214	0.276786	0.160714	0.035398	0.256637	0.495575	0.743363	0.99115	0.044248	0.247788	0.460177	0.814159	1	0.00885	0.141593	0.477876	0.681416	0.982301	0.362832	0.256637	0.380531	0.089286	0.071429	0.017857	0.00885	0.150442	0.442478	0.743363	1	0.053097	0.106195	0.451327	0.566372	0.831858	0.159292	0.238938	0.646018	0.769912	0.982301	0.460177	0.428571	0.026549	0.212389	0.460177	0.681416	0.938053	0.230088
0.284884	0.337209	0.377907	0.19883	0.210526	0.274854	0.046512	0.302326	0.546512	0.802326	0.965116	0.017442	0.226744	0.418605	0.662791	1	0.005814	0.255814	0.488372	0.738372	0.994186	0.406977	0.494186	0.098837	0.152047	0.023392	0	0.005814	0.319767	0.656977	0.773256	1	0.011628	0.30814	0.505814	0.744186	0.94186	0.087209	0.127907	0.151163	0.174419	0.203488	0.569767	0.397661	0.011628	0.27907	0.534884	0.744186	0.994186	0.354651
0.385629	0.337725	0.276647	0.272182	0.201439	0.183453	0.003593	0.235928	0.51497	0.776048	1	0.002395	0.273054	0.535329	0.760479	0.998802	0.001198	0.233533	0.432335	0.674251	0.972455	0.486228	0.203593	0.31018	0.07554	0.063549	0.003597	0.001198	0.247904	0.523353	0.832335	1	0.086228	0.202395	0.427545	0.790419	0.877844	0.010778	0.300599	0.51497	0.693413	0.958084	0.474251	0.338129	0.005988	0.25988	0.456287	0.673054	0.966467	0.354491
0.331818	0.336364	0.331818	0.210046	0.246575	0.223744	0.013636	0.231818	0.490909	0.781818	0.995455	0.018182	0.286364	0.454545	0.663636	1	0.004545	0.204545	0.586364	0.759091	0.990909	0.536364	0.145455	0.318182	0.091324	0.073059	0	0.004545	0.277273	0.422727	0.659091	1	0.018182	0.118182	0.618182	0.759091	0.936364	0.05	0.240909	0.586364	0.804545	0.990909	0.513636	0.401826	0.009091	0.309091	0.545455	0.759091	0.990909	0.359091
0.408451	0.305164	0.286385	0.221698	0.240566	0.150943	0.023474	0.225352	0.507042	0.769953	0.985915	0.00939	0.262911	0.413146	0.558685	1	0.004695	0.187793	0.605634	0.798122	0.995305	0.530516	0.14554	0.323944	0.084906	0.066038	0	0.004695	0.262911	0.403756	0.647887	1	0.014085	0.061033	0.600939	0.755869	0.938967	0.098592	0.215962	0.57277	0.802817	0.995305	0.516432	0.386792	0.018779	0.319249	0.525822	0.755869	0.995305	0.309859
0.311881	0.387789	0.30033	0.22314	0.190083	0.271074	0.006601	0.221122	0.457096	0.712871	0.9967	0.0033	0.262376	0.4967	0.762376	1	0.00165	0.242574	0.536304	0.764026	0.99835	0.528053	0.20132	0.270627	0.072727	0.056198	0.003306	0.00165	0.277228	0.468647	0.712871	1	0.087459	0.227723	0.59736	0.744224	0.99505	0.013201	0.193069	0.544554	0.80363	0.963696	0.539604	0.37686	0.009901	0.249175	0.531353	0.767327	0.99505	0.419142
0.368421	0.410526	0.221053	0.380952	0.164021	0.15873	0.015789	0.315789	0.610526	0.789474	1	0.010526	0.268421	0.510526	0.778947	0.984211	0.005263	0.157895	0.347368	0.515789	0.889474	0.347368	0.294737	0.357895	0.058201	0.089947	0.005291	0.005263	0.305263	0.721053	0.905263	1	0.021053	0.378947	0.463158	0.536842	0.9	0.068421	0.173684	0.273684	0.621053	0.942105	0.321053	0.359788	0.021053	0.178947	0.310526	0.478947	0.878947	0.431579
0.301887	0.40566	0.292453	0.251185	0.227488	0.21327	0.009434	0.221698	0.438679	0.669811	1	0.014151	0.240566	0.570755	0.84434	0.990566	0.004717	0.287736	0.495283	0.660377	0.886792	0.438679	0.363208	0.198113	0.127962	0.07109	0.004739	0.004717	0.273585	0.570755	0.783019	1	0.018868	0.283019	0.438679	0.613208	0.858491	0.080189	0.216981	0.556604	0.900943	0.985849	0.40566	0.454976	0.023585	0.245283	0.448113	0.660377	0.929245	0.415094
0.341176	0.382353	0.276471	0.248521	0.236686	0.218935	0.023529	0.276471	0.582353	0.841176	0.994118	0.011765	0.170588	0.441176	0.705882	1	0.005882	0.205882	0.411765	0.7	0.970588	0.376471	0.170588	0.452941	0.059172	0.08284	0	0.005882	0.141176	0.364706	0.582353	1	0.023529	0.058824	0.335294	0.4	0.805882	0.135294	0.441176	0.688235	0.852941	0.988235	0.417647	0.508876	0.029412	0.229412	0.441176	0.717647	0.970588	0.417647
0.416667	0.270833	0.3125	0.231579	0.231579	0.178947	0.052083	0.3125	0.552083	0.75	0.979167	0.03125	0.166667	0.40625	0.71875	1	0.010417	0.21875	0.479167	0.6875	0.989583	0.333333	0.25	0.416667	0.126316	0.063158	0	0.010417	0.208333	0.53125	0.885417	1	0.177083	0.479167	0.760417	0.84375	0.979167	0.041667	0.135417	0.395833	0.614583	0.71875	0.4375	0.421053	0.0625	0.25	0.489583	0.739583	0.96875	0.28125
0.446541	0.279088	0.274371	0.223446	0.211644	0.174666	0.003145	0.198899	0.451258	0.779088	1	0.001572	0.258648	0.507862	0.745283	0.997642	0.000786	0.301887	0.538522	0.724843	0.994497	0.40173	0.043239	0.555031	0.01967	0.09048	0.005507	0.000786	0.333333	0.562107	0.830189	1	0.033019	0.524371	0.860849	0.922956	0.995283	0.032233	0.194969	0.464623	0.654874	0.970912	0.397799	0.352478	0.013365	0.290881	0.538522	0.704403	0.996069	0.31761
0.41573	0.2397	0.344569	0.184211	0.255639	0.199248	0.007491	0.247191	0.516854	0.794007	1	0.018727	0.235955	0.531835	0.696629	0.996255	0.003745	0.243446	0.464419	0.715356	0.981273	0.374532	0.183521	0.441948	0.06015	0.097744	0	0.003745	0.157303	0.426966	0.692884	1	0.048689	0.292135	0.404494	0.621723	0.719101	0.018727	0.265918	0.520599	0.82397	0.992509	0.546816	0.398496	0.011236	0.228464	0.464419	0.674157	0.996255	0.265918
0.316327	0.331633	0.352041	0.2	0.241026	0.235897	0.010204	0.229592	0.484694	0.709184	0.994898	0.02551	0.239796	0.510204	0.826531	1	0.005102	0.244898	0.459184	0.673469	0.989796	0.382653	0.403061	0.214286	0.164103	0.030769	0	0.005102	0.219388	0.515306	0.755102	1	0.015306	0.173469	0.47449	0.683673	0.989796	0.336735	0.382653	0.438776	0.790816	0.846939	0.479592	0.451282	0.020408	0.362245	0.505102	0.693878	0.959184	0.30102
0.334604	0.52439	0.141006	0.278413	0.09077	0.138063	0.001524	0.259146	0.490854	0.719512	0.992378	0.005335	0.253811	0.502287	0.747713	0.999238	0.000762	0.176067	0.528201	0.832317	1	0.733994	0.057165	0.208841	0.023646	0.04958	0.005339	0.000762	0.253811	0.496189	0.724848	1	0.04878	0.279726	0.351372	0.640244	0.887957	0.023628	0.216463	0.532774	0.852134	0.974848	0.25	0.230359	0.022104	0.17378	0.370427	0.835366	0.997713	0.568598
0.436314	0.319783	0.243902	0.293478	0.230978	0.163043	0.00542	0.200542	0.436314	0.728997	1	0.00813	0.298103	0.558266	0.783198	0.98374	0.00271	0.303523	0.498645	0.726287	0.99729	0.601626	0.230352	0.168022	0.086957	0.048913	0	0.00271	0.230352	0.547425	0.826558	1	0.094851	0.360434	0.452575	0.696477	0.99458	0.01084	0.075881	0.479675	0.674797	0.95935	0.330623	0.353261	0.01084	0.346883	0.506775	0.745257	0.99729	0.365854
0.363484	0.353434	0.283082	0.278523	0.209732	0.191275	0.0067	0.281407	0.561139	0.777219	1	0.00335	0.18258	0.450586	0.720268	0.99665	0.001675	0.283082	0.470687	0.703518	0.9866	0.467337	0.142379	0.390285	0.055369	0.075503	0.005034	0.001675	0.20268	0.561139	0.772194	1	0.0067	0.288107	0.440536	0.631491	0.931323	0.033501	0.266332	0.497487	0.785595	0.917923	0.472362	0.33557	0.011725	0.229481	0.440536	0.676717	0.9866	0.370184
0.304167	0.358333	0.3375	0.179916	0.225941	0.263598	0.0375	0.341667	0.575	0.820833	1	0.008333	0.1875	0.3875	0.604167	0.983333	0.004167	0.295833	0.541667	0.741667	0.9875	0.479167	0.358333	0.1625	0.133891	0.025105	0	0.004167	0.25	0.458333	0.666667	1	0.0125	0.166667	0.325	0.554167	0.816667	0.720833	0.841667	0.883333	0.9375	0.979167	0.579167	0.317992	0.0125	0.270833	0.495833	0.7375	0.9875	0.404167
0.374251	0.405689	0.22006	0.278861	0.173913	0.164918	0.002994	0.223054	0.450599	0.732036	0.997006	0.004491	0.303892	0.570359	0.775449	0.982036	0.001497	0.226048	0.47006	0.702096	1	0.637725	0.088323	0.273952	0.049475	0.076462	0.004498	0.001497	0.241018	0.519461	0.784431	1	0.073353	0.176647	0.321856	0.642216	0.859281	0.019461	0.278443	0.511976	0.738024	0.991018	0.362275	0.377811	0.008982	0.320359	0.501497	0.714072	0.986527	0.387725
0.308442	0.415584	0.275974	0.201954	0.159609	0.260586	0.061688	0.308442	0.512987	0.74026	1	0.006494	0.159091	0.415584	0.743506	0.980519	0.003247	0.217532	0.535714	0.766234	0.996753	0.470779	0.201299	0.327922	0.081433	0.081433	0.016287	0.003247	0.191558	0.366883	0.688312	1	0.094156	0.204545	0.558442	0.730519	0.808442	0.042208	0.422078	0.646104	0.866883	0.993506	0.470779	0.416938	0.016234	0.279221	0.590909	0.798701	0.993506	0.428571
0.363014	0.363014	0.273973	0.255172	0.248276	0.186207	0.013699	0.321918	0.445205	0.739726	1	0.054795	0.246575	0.5	0.678082	0.986301	0.006849	0.191781	0.520548	0.767123	0.972603	0.335616	0.328767	0.335616	0.131034	0.048276	0.006897	0.006849	0.150685	0.561644	0.746575	1	0.013699	0.19863	0.60274	0.883562	0.986301	0.164384	0.321918	0.40411	0.486301	0.821918	0.39726	0.482759	0.020548	0.19863	0.534247	0.732877	0.972603	0.369863
0.389247	0.384946	0.225806	0.25	0.200431	0.176724	0.006452	0.219355	0.498925	0.744086	1	0.004301	0.28172	0.56129	0.767742	0.995699	0.002151	0.23871	0.43871	0.660215	0.997849	0.677419	0.094624	0.227957	0.036638	0.040948	0.006466	0.002151	0.27957	0.595699	0.804301	1	0.283871	0.322581	0.436559	0.834409	0.926882	0.032258	0.126882	0.329032	0.486022	0.802151	0.408602	0.37931	0.012903	0.24086	0.443011	0.724731	0.989247	0.380645
0.301552	0.394678	0.303769	0.242222	0.177778	0.233333	0.004435	0.226164	0.518847	0.807095	1	0.006652	0.261641	0.505543	0.740576	0.993348	0.002217	0.24612	0.474501	0.696231	0.980044	0.463415	0.121951	0.414634	0.044444	0.084444	0.004444	0.002217	0.223947	0.487805	0.804878	1	0.011086	0.093126	0.40133	0.844789	0.946785	0.108647	0.332594	0.527716	0.698448	0.984479	0.569845	0.346667	0.013304	0.312639	0.523282	0.711752	0.988914	0.392461
0.30014	0.474053	0.225806	0.251404	0.13764	0.226124	0.002805	0.215989	0.54979	0.799439	1	0.008415	0.2777	0.478261	0.713885	0.997195	0.001403	0.196353	0.488079	0.746143	0.998597	0.697055	0.072931	0.230014	0.039326	0.067416	0	0.001403	0.295933	0.506311	0.734923	1	0.002805	0.042076	0.558205	0.687237	0.800842	0.061711	0.15007	0.343619	0.862553	0.939691	0.361851	0.36236	0.00561	0.27209	0.5554	0.744741	0.978962	0.478261
0.40057	0.436921	0.162509	0.335949	0.126248	0.136947	0.002851	0.277263	0.472559	0.734141	0.997862	0.001426	0.19387	0.445474	0.686386	1	0.000713	0.342124	0.689237	0.828225	0.985745	0.726301	0.02067	0.253029	0.014265	0.079886	0	0.000713	0.181041	0.394868	0.671418	1	0.228083	0.246614	0.301497	0.689237	0.980043	0.315039	0.460442	0.727726	0.824661	0.98717	0.218817	0.215407	0.006415	0.600143	0.749109	0.866001	0.995011	0.432644
0.375587	0.422535	0.201878	0.292453	0.150943	0.193396	0.014085	0.183099	0.483568	0.699531	0.985915	0.023474	0.29108	0.619718	0.798122	1	0.004695	0.201878	0.441315	0.671362	0.892019	0.657277	0.056338	0.286385	0.033019	0.061321	0.004717	0.004695	0.28169	0.610329	0.807512	1	0.244131	0.253521	0.666667	0.774648	0.896714	0.051643	0.169014	0.455399	0.535211	0.882629	0.338028	0.386792	0.089202	0.309859	0.558685	0.812207	0.967136	0.450704
0.329082	0.42602	0.244898	0.255754	0.153453	0.196931	0.010204	0.247449	0.408163	0.719388	0.969388	0.005102	0.331633	0.540816	0.790816	1	0.002551	0.196429	0.431122	0.709184	0.997449	0.553571	0.145408	0.30102	0.061381	0.066496	0.005115	0.002551	0.32398	0.538265	0.80102	1	0.081633	0.135204	0.454082	0.704082	0.84949	0.015306	0.221939	0.367347	0.729592	0.987245	0.471939	0.373402	0.012755	0.239796	0.5	0.790816	0.997449	0.469388
0.320856	0.406417	0.272727	0.236559	0.193548	0.204301	0.010695	0.144385	0.427807	0.641711	0.994652	0.016043	0.358289	0.71123	0.84492	0.983957	0.005348	0.213904	0.406417	0.566845	1	0.540107	0.171123	0.28877	0.064516	0.053763	0.010753	0.005348	0.165775	0.673797	0.850267	1	0.144385	0.192513	0.347594	0.459893	0.786096	0.032086	0.454545	0.534759	0.604278	0.860963	0.433155	0.376344	0.026738	0.294118	0.465241	0.59893	0.97861	0.406417
0.347162	0.381368	0.27147	0.248361	0.182083	0.207575	0.002183	0.269287	0.502911	0.75837	1	0.002911	0.161572	0.413392	0.713246	0.996361	0.000728	0.385735	0.565502	0.77802	0.998544	0.518923	0.077147	0.40393	0.032775	0.085215	0.003642	0.000728	0.135371	0.342795	0.614265	1	0.03639	0.417031	0.458515	0.611354	0.954876	0.026929	0.47671	0.666667	0.835517	0.998544	0.45706	0.355426	0.004367	0.377729	0.55968	0.756186	0.998544	0.372635
0.40625	0.291667	0.302083	0.242105	0.157895	0.221053	0.020833	0.25	0.541667	0.770833	0.958333	0.03125	0.28125	0.447917	0.635417	0.989583	0.010417	0.208333	0.427083	0.697917	1	0.46875	0.53125	0	0.168421	0	0	0.010417	0.3125	0.53125	0.802083	1	0.020833	0.197917	0.385417	0.6875	0.979167	0	0	0	0	0	0.302083	0.4	0.03125	0.208333	0.416667	0.697917	0.96875	0.291667
0.364865	0.324324	0.310811	0.217687	0.238095	0.258503	0.040541	0.283784	0.533784	0.72973	1	0.02027	0.243243	0.459459	0.831081	0.993243	0.006757	0.175676	0.452703	0.662162	0.972973	0.432432	0.175676	0.391892	0.054422	0.068027	0	0.006757	0.358108	0.77027	0.878378	1	0.128378	0.162162	0.222973	0.317568	0.972973	0.033784	0.385135	0.533784	0.655405	0.756757	0.493243	0.408163	0.027027	0.162162	0.344595	0.621622	0.912162	0.324324
0.27451	0.502451	0.223039	0.238037	0.11411	0.213497	0.002451	0.259804	0.48652	0.794118	1	0.003676	0.203431	0.457108	0.675245	0.998775	0.001225	0.340686	0.604167	0.792892	0.997549	0.682598	0.171569	0.145833	0.077301	0.040491	0.003681	0.001225	0.234069	0.498775	0.762255	1	0.04902	0.468137	0.632353	0.785539	0.991422	0.082108	0.214461	0.269608	0.405637	0.944853	0.457108	0.33865	0.01348	0.22549	0.534314	0.713235	0.992647	0.471814
0.286401	0.412088	0.301511	0.234364	0.172509	0.245361	0.001374	0.261676	0.476648	0.728709	0.991071	0.002747	0.233516	0.524038	0.761676	0.999313	0.000687	0.255495	0.503434	0.75206	1	0.570055	0.348901	0.081044	0.119588	0.024742	0.006873	0.000687	0.252747	0.485577	0.71978	1	0.008929	0.247253	0.510989	0.762363	0.995192	0.041896	0.181319	0.399038	0.93544	0.989011	0.60783	0.290034	0.00206	0.265797	0.527473	0.765797	0.998626	0.441621
0.285036	0.534442	0.180523	0.283333	0.116667	0.154762	0.004751	0.19715	0.384798	0.63658	0.995249	0.016627	0.406176	0.631829	0.814727	0.997625	0.002375	0.125891	0.299287	0.501188	1	0.726841	0.149644	0.123515	0.059524	0.035714	0.002381	0.002375	0.437055	0.619952	0.807601	1	0.019002	0.114014	0.230404	0.330166	0.928741	0.009501	0.066508	0.263658	0.35867	0.895487	0.638955	0.242857	0.016627	0.36342	0.591449	0.767221	0.988124	0.505938
0.307692	0.418269	0.274038	0.270531	0.130435	0.270531	0.028846	0.322115	0.543269	0.850962	1	0.009615	0.192308	0.418269	0.716346	0.990385	0.004808	0.240385	0.471154	0.682692	0.985577	0.514423	0.129808	0.355769	0.048309	0.10628	0	0.004808	0.173077	0.413462	0.860577	1	0.389423	0.427885	0.466346	0.668269	0.701923	0.019231	0.235577	0.596154	0.764423	0.956731	0.432692	0.347826	0.019231	0.399038	0.596154	0.735577	0.956731	0.403846
0.338983	0.39548	0.265537	0.289773	0.215909	0.244318	0.022599	0.248588	0.463277	0.757062	1	0.011299	0.242938	0.536723	0.745763	0.99435	0.00565	0.231638	0.474576	0.728814	0.988701	0.440678	0.220339	0.338983	0.102273	0.068182	0	0.00565	0.282486	0.553672	0.694915	1	0.101695	0.288136	0.423729	0.728814	0.99435	0.011299	0.214689	0.474576	0.853107	0.960452	0.525424	0.477273	0.022599	0.254237	0.497175	0.723164	0.988701	0.418079
0.338942	0.334135	0.326923	0.231325	0.243373	0.255422	0.007212	0.269231	0.5	0.740385	1	0.014423	0.216346	0.463942	0.745192	0.997596	0.002404	0.252404	0.524038	0.752404	0.995192	0.370192	0.141827	0.487981	0.062651	0.096386	0.004819	0.002404	0.242788	0.557692	0.807692	1	0.112981	0.204327	0.564904	0.915865	0.997596	0.004808	0.257212	0.449519	0.716346	0.954327	0.574519	0.375904	0.012019	0.223558	0.480769	0.6875	0.995192	0.367788
0.45045	0.198198	0.351351	0.1	0.309091	0.118182	0.018018	0.171171	0.522523	0.765766	1	0.117117	0.207207	0.333333	0.468468	0.810811	0.009009	0.252252	0.594595	0.792793	0.990991	0.351351	0.171171	0.477477	0.072727	0.054545	0.018182	0.009009	0.171171	0.315315	0.684685	1	0.234234	0.261261	0.378378	0.720721	0.972973	0.081081	0.441441	0.558559	0.837838	0.963964	0.432432	0.381818	0.045045	0.261261	0.477477	0.72973	0.990991	0.198198
0.39	0.28	0.33	0.232323	0.313131	0.141414	0.03	0.3	0.52	0.76	0.98	0.02	0.2	0.41	0.78	1	0.01	0.22	0.46	0.7	0.95	0.44	0.19	0.37	0.10101	0.10101	0	0.01	0.2	0.45	0.62	1	0.04	0.07	0.47	0.52	0.76	0.11	0.37	0.67	0.87	0.97	0.45	0.444444	0.04	0.2	0.44	0.72	0.95	0.29
0.185118	0.597096	0.217786	0.163636	0.069091	0.234545	0.009074	0.633394	0.805808	0.889292	0.998185	0.00363	0.232305	0.421053	0.611615	1	0.001815	0.196007	0.53902	0.715064	0.994555	0.882033	0.049002	0.068966	0.02	0.016364	0.001818	0.001815	0.228675	0.450091	0.709619	1	0.039927	0.656987	0.715064	0.950998	0.970962	0.675136	0.689655	0.742287	0.758621	0.867514	0.203267	0.185455	0.039927	0.671506	0.758621	0.878403	0.994555	0.598911
0.339744	0.317308	0.342949	0.270096	0.254019	0.180064	0.016026	0.237179	0.496795	0.74359	1	0.009615	0.189103	0.432692	0.717949	0.996795	0.003205	0.298077	0.548077	0.759615	0.987179	0.298077	0.009615	0.692308	0.003215	0.093248	0.003215	0.003205	0.339744	0.580128	0.762821	1	0.503205	0.503205	0.503205	0.50641	0.509615	0.025641	0.208333	0.458333	0.695513	0.987179	0.570513	0.340836	0.041667	0.25641	0.509615	0.701923	0.987179	0.310897
0.314286	0.371429	0.314286	0.221311	0.192623	0.245902	0.008163	0.273469	0.526531	0.763265	1	0.02449	0.220408	0.477551	0.746939	0.995918	0.004082	0.244898	0.481633	0.714286	0.987755	0.395918	0.183673	0.420408	0.07377	0.090164	0	0.004082	0.355102	0.502041	0.771429	1	0.089796	0.216327	0.428571	0.738776	0.865306	0.012245	0.155102	0.477551	0.689796	0.971429	0.579592	0.360656	0.016327	0.22449	0.481633	0.693878	0.991837	0.37551
0.321839	0.344828	0.333333	0.22093	0.22093	0.232558	0.034483	0.218391	0.563218	0.735632	0.965517	0.022989	0.264368	0.45977	0.712644	1	0.011494	0.172414	0.494253	0.724138	0.988506	0.367816	0.264368	0.367816	0.093023	0.023256	0	0.011494	0.172414	0.333333	0.793103	1	0.034483	0.08046	0.275862	0.885057	0.954023	0.413793	0.494253	0.586207	0.678161	0.770115	0.551724	0.418605	0.045977	0.287356	0.505747	0.747126	0.988506	0.37931
0.322581	0.322581	0.354839	0.25	0.293478	0.163043	0.032258	0.193548	0.483871	0.698925	0.946237	0.021505	0.204301	0.462366	0.741935	0.967742	0.010753	0.258065	0.516129	0.72043	1	0.505376	0.236559	0.258065	0.108696	0.043478	0	0.010753	0.11828	0.301075	0.591398	1	0.139785	0.258065	0.677419	0.731183	0.989247	0.333333	0.387097	0.451613	0.83871	0.903226	0.430108	0.456522	0.129032	0.333333	0.548387	0.731183	0.978495	0.397849
0.298701	0.311688	0.38961	0.171053	0.157895	0.276316	0.064935	0.363636	0.558442	0.818182	1	0.038961	0.311688	0.506494	0.675325	0.974026	0.012987	0.12987	0.25974	0.649351	0.961039	0.571429	0.090909	0.337662	0.052632	0.052632	0	0.012987	0.350649	0.493506	0.701299	1	0.545455	0.545455	0.571429	0.597403	0.961039	0.038961	0.103896	0.194805	0.779221	0.87013	0.493506	0.263158	0.051948	0.168831	0.506494	0.636364	0.935065	0.402597
0.355009	0.351494	0.293497	0.219877	0.226913	0.205805	0.001757	0.272408	0.47891	0.745167	0.996485	0.005272	0.181019	0.464851	0.726714	0.999121	0.000879	0.304042	0.55536	0.77768	1	0.543058	0.1942	0.262742	0.076517	0.085312	0.006157	0.000879	0.235501	0.443761	0.719684	1	0.001757	0.404218	0.54833	0.832162	0.943761	0.022847	0.246046	0.578207	0.731107	0.993849	0.485062	0.369393	0.002636	0.316344	0.599297	0.790861	0.997364	0.36819
0.361842	0.345395	0.292763	0.234323	0.254125	0.20132	0.006579	0.217105	0.447368	0.631579	0.996711	0.013158	0.253289	0.552632	0.763158	0.993421	0.003289	0.259868	0.463816	0.730263	1	0.467105	0.210526	0.322368	0.056106	0.062706	0.009901	0.003289	0.282895	0.680921	0.796053	1	0.082237	0.233553	0.322368	0.411184	0.973684	0.013158	0.197368	0.5	0.611842	0.930921	0.440789	0.39604	0.013158	0.269737	0.467105	0.733553	0.986842	0.401316
0.274168	0.394612	0.33122	0.201587	0.179365	0.273016	0.007924	0.226624	0.510301	0.776545	0.995246	0.00317	0.255151	0.499208	0.692552	1	0.001585	0.242472	0.481775	0.767036	0.998415	0.434231	0.277338	0.288431	0.112698	0.065079	0.007937	0.001585	0.256735	0.521395	0.736926	1	0.004754	0.488114	0.706815	0.846276	0.998415	0.009509	0.134707	0.288431	0.451664	0.946117	0.698891	0.307937	0.006339	0.275753	0.48336	0.713154	0.99683	0.364501
0.361179	0.309582	0.329238	0.204433	0.246305	0.20936	0.009828	0.267813	0.5086	0.742015	1	0.004914	0.226044	0.486486	0.737101	0.982801	0.002457	0.230958	0.484029	0.764128	0.997543	0.223587	0.034398	0.742015	0.012315	0.096059	0.002463	0.002457	0.250614	0.540541	0.737101	1	0.253071	0.257985	0.874693	0.882064	0.904177	0.012285	0.228501	0.4914	0.717445	0.995086	0.513514	0.423645	0.012285	0.262899	0.511057	0.764128	0.997543	0.312039
0.167089	0.470886	0.362025	0.134518	0.111675	0.317259	0.020253	0.23038	0.392405	0.792405	1	0.010127	0.308861	0.605063	0.812658	0.987342	0.002532	0.21519	0.43038	0.607595	0.989873	0.23038	0.020253	0.749367	0.005076	0.076142	0.005076	0.002532	0.321519	0.63038	0.903797	1	0.493671	0.496203	0.698734	0.703797	0.708861	0.017722	0.220253	0.453165	0.693671	0.95443	0.698734	0.258883	0.007595	0.248101	0.529114	0.744304	0.949367	0.473418
0.344444	0.348148	0.307407	0.204461	0.208178	0.219331	0.022222	0.188889	0.496296	0.748148	1	0.007407	0.285185	0.47037	0.762963	0.996296	0.003704	0.274074	0.507407	0.718519	0.985185	0.444444	0.185185	0.37037	0.078067	0.063197	0.003717	0.003704	0.244444	0.492593	0.803704	1	0.218519	0.385185	0.792593	0.914815	0.985185	0.033333	0.159259	0.374074	0.611111	0.707407	0.6	0.342007	0.048148	0.311111	0.52963	0.748148	0.985185	0.325926
0.336683	0.335008	0.328308	0.184564	0.228188	0.208054	0.015075	0.247906	0.500838	0.723618	0.99665	0.00335	0.284757	0.517588	0.770519	0.998325	0.001675	0.217755	0.470687	0.740369	1	0.413735	0.105528	0.480737	0.043624	0.087248	0.003356	0.001675	0.244556	0.472362	0.805695	1	0.056951	0.135678	0.256281	0.480737	0.968174	0.0067	0.291457	0.546064	0.693467	0.9933	0.514238	0.352349	0.0067	0.237856	0.417085	0.738693	0.991625	0.340034
0.241758	0.450549	0.307692	0.266667	0.155556	0.322222	0.054945	0.318681	0.637363	0.802198	0.989011	0.043956	0.274725	0.494505	0.692308	1	0.010989	0.164835	0.351648	0.626374	0.978022	0.450549	0.076923	0.472527	0.044444	0.066667	0	0.010989	0.406593	0.637363	0.813187	1	0.626374	0.626374	0.736264	0.758242	0.78022	0.054945	0.153846	0.274725	0.472527	0.923077	0.56044	0.4	0.043956	0.186813	0.461538	0.725275	0.956044	0.494505
0.479554	0.286245	0.234201	0.227612	0.223881	0.123134	0.022305	0.245353	0.527881	0.821561	1	0.007435	0.167286	0.475836	0.665428	0.962825	0.003717	0.282528	0.442379	0.66171	0.925651	0.561338	0.126394	0.312268	0.044776	0.052239	0	0.003717	0.408922	0.639405	0.858736	1	0.416357	0.468401	0.535316	0.64684	0.843866	0.100372	0.174721	0.252788	0.356877	0.806691	0.356877	0.365672	0.048327	0.29368	0.472119	0.724907	0.95539	0.349442
0.231767	0.487844	0.280389	0.219156	0.142857	0.251623	0.008104	0.207455	0.466775	0.662885	1	0.006483	0.275527	0.531605	0.768233	0.998379	0.001621	0.223663	0.442464	0.692058	0.996759	0.562399	0.179903	0.257699	0.068182	0.061688	0.003247	0.001621	0.356564	0.658023	0.833063	1	0.08752	0.220421	0.497569	0.636953	0.972447	0.004862	0.183144	0.309562	0.455429	0.685575	0.531605	0.324675	0.004862	0.213938	0.421394	0.635332	0.996759	0.513776
0.294521	0.369863	0.335616	0.213793	0.186207	0.213793	0.013699	0.369863	0.60274	0.780822	0.972603	0.054795	0.294521	0.493151	0.712329	0.993151	0.006849	0.116438	0.335616	0.609589	1	0.445205	0.054795	0.5	0.027586	0.110345	0	0.006849	0.30137	0.527397	0.691781	1	0.609589	0.616438	0.630137	0.657534	0.671233	0.020548	0.191781	0.458904	0.767123	0.945205	0.554795	0.4	0.020548	0.164384	0.356164	0.609589	0.952055	0.438356
0.3098	0.386723	0.303477	0.245781	0.206751	0.222574	0.002107	0.240253	0.508957	0.73235	1	0.005269	0.255005	0.496312	0.765016	0.997893	0.001054	0.243414	0.487882	0.744995	0.995785	0.593256	0.385669	0.021075	0.14135	0.00211	0.00211	0.001054	0.252898	0.511064	0.770285	1	0.003161	0.238145	0.45627	0.68177	0.955743	0.879874	0.978925	0.984194	0.989463	0.994731	0.41412	0.394515	0.003161	0.27608	0.542677	0.830348	0.996839	0.393045
0.280808	0.408081	0.311111	0.210313	0.195147	0.262892	0.015152	0.247475	0.510101	0.766667	1	0.00202	0.258586	0.517172	0.751515	0.99798	0.00101	0.245455	0.469697	0.719192	0.99697	0.477778	0.160606	0.361616	0.077856	0.083923	0.007078	0.00101	0.224242	0.525253	0.750505	1	0.00202	0.30101	0.532323	0.845455	0.974747	0.013131	0.242424	0.433333	0.705051	0.99798	0.584848	0.35996	0.00303	0.282828	0.50303	0.759596	0.99798	0.424242
0.218597	0.417618	0.363785	0.179739	0.137255	0.336601	0.013051	0.230016	0.597064	0.836868	0.998369	0.003263	0.278956	0.522023	0.734095	0.995106	0.001631	0.231648	0.433931	0.698206	1	0.352365	0.057096	0.590538	0.027778	0.060458	0.004902	0.001631	0.323002	0.737357	0.838499	1	0.008157	0.30832	0.476346	0.776509	0.978793	0.021207	0.212072	0.412724	0.616639	0.95106	0.769984	0.179739	0.006525	0.244698	0.468189	0.698206	0.990212	0.391517
0.228137	0.422053	0.34981	0.160305	0.133588	0.320611	0.125475	0.346008	0.498099	0.703422	1	0.007605	0.231939	0.539924	0.775665	0.996198	0.003802	0.193916	0.437262	0.752852	0.988593	0.490494	0.326996	0.18251	0.148855	0.041985	0.003817	0.003802	0.292776	0.498099	0.646388	1	0.13308	0.273764	0.479087	0.78327	0.942966	0.007605	0.04943	0.288973	0.946768	0.996198	0.589354	0.335878	0.011407	0.224335	0.467681	0.768061	0.988593	0.498099
0.360465	0.296512	0.343023	0.192982	0.233918	0.204678	0.011628	0.174419	0.511628	0.843023	1	0.081395	0.296512	0.5	0.732558	0.994186	0.005814	0.186047	0.465116	0.633721	0.965116	0.546512	0.25	0.203488	0.187135	0.035088	0	0.005814	0.209302	0.430233	0.622093	1	0.139535	0.273256	0.482558	0.662791	0.784884	0.063953	0.104651	0.854651	0.930233	0.982558	0.569767	0.339181	0.023256	0.273256	0.511628	0.668605	0.965116	0.290698
0.272472	0.311798	0.41573	0.15493	0.15493	0.31831	0.008427	0.485955	0.648876	0.817416	0.997191	0.011236	0.22191	0.460674	0.719101	0.988764	0.002809	0.216292	0.401685	0.688202	1	0.233146	0.11236	0.654494	0.030986	0.064789	0.002817	0.002809	0.342697	0.662921	0.842697	1	0.16573	0.632022	0.766854	0.879213	0.985955	0.005618	0.219101	0.396067	0.58427	0.960674	0.724719	0.264789	0.005618	0.224719	0.421348	0.679775	0.994382	0.289326
0.343915	0.328042	0.328042	0.177719	0.217507	0.220159	0.005291	0.224868	0.486772	0.719577	1	0.013228	0.275132	0.539683	0.806878	0.997354	0.002646	0.243386	0.465608	0.714286	0.978836	0.457672	0.174603	0.367725	0.074271	0.074271	0.005305	0.002646	0.283069	0.579365	0.76455	1	0.007937	0.378307	0.611111	0.838624	0.933862	0.047619	0.166667	0.417989	0.571429	0.984127	0.624339	0.275862	0.007937	0.277778	0.478836	0.73545	0.978836	0.375661
0.309353	0.363309	0.327338	0.212996	0.198556	0.212996	0.010791	0.273381	0.482014	0.723022	0.967626	0.007194	0.233813	0.528777	0.751799	0.996403	0.003597	0.172662	0.453237	0.733813	1	0.366906	0.183453	0.44964	0.068592	0.075812	0.00361	0.003597	0.208633	0.402878	0.719424	1	0.014388	0.100719	0.284173	0.669065	0.92446	0.010791	0.467626	0.582734	0.791367	0.992806	0.528777	0.425993	0.010791	0.223022	0.467626	0.726619	0.989209	0.330935
0.401114	0.311978	0.286908	0.217877	0.240223	0.189944	0.011142	0.203343	0.476323	0.710306	0.991643	0.005571	0.284123	0.479109	0.743733	0.997214	0.002786	0.295265	0.562674	0.768802	1	0.520891	0.050139	0.428969	0.03352	0.089385	0	0.002786	0.236769	0.467967	0.707521	1	0.261838	0.554318	0.640669	0.791086	0.880223	0.019499	0.214485	0.520891	0.766017	0.963788	0.423398	0.469274	0.008357	0.359331	0.590529	0.760446	0.988858	0.337047
0.333333	0.354167	0.3125	0.178947	0.252632	0.284211	0.020833	0.333333	0.5625	0.729167	1	0.0625	0.197917	0.479167	0.760417	0.979167	0.010417	0.135417	0.395833	0.6875	0.96875	0.510417	0.125	0.364583	0.063158	0.084211	0.021053	0.010417	0.260417	0.5625	0.770833	1	0.041667	0.489583	0.604167	0.6875	0.71875	0.0625	0.177083	0.34375	0.479167	0.9375	0.427083	0.526316	0.041667	0.145833	0.385417	0.666667	0.96875	0.385417
0.208696	0.469565	0.321739	0.236842	0.061404	0.333333	0.034783	0.313043	0.521739	0.695652	0.965217	0.017391	0.252174	0.478261	0.704348	1	0.008696	0.217391	0.4	0.756522	0.93913	0.6	0.069565	0.330435	0.052632	0.035088	0	0.008696	0.321739	0.469565	0.669565	1	0.478261	0.521739	0.53913	0.556522	0.930435	0.13913	0.208696	0.295652	0.765217	0.852174	0.513043	0.280702	0.069565	0.243478	0.434783	0.73913	0.982609	0.417391
0.354651	0.319767	0.325581	0.222222	0.245614	0.181287	0.017442	0.244186	0.488372	0.709302	0.982558	0.011628	0.19186	0.447674	0.755814	1	0.005814	0.290698	0.517442	0.738372	0.994186	0.44186	0.127907	0.430233	0.064327	0.087719	0.017544	0.005814	0.232558	0.52907	0.72093	1	0.360465	0.511628	0.593023	0.75	0.906977	0.05814	0.203488	0.406977	0.686047	0.988372	0.465116	0.444444	0.023256	0.30814	0.52907	0.75	0.976744	0.337209
0.430435	0.278261	0.291304	0.231441	0.292576	0.152838	0.008696	0.195652	0.4	0.721739	0.995652	0.034783	0.247826	0.547826	0.826087	0.982609	0.004348	0.313043	0.530435	0.686957	1	0.413043	0.143478	0.443478	0.061135	0.078603	0	0.004348	0.386957	0.669565	0.886957	1	0.36087	0.456522	0.595652	0.7	0.926087	0.017391	0.16087	0.295652	0.521739	0.83913	0.356522	0.41048	0.021739	0.3	0.530435	0.686957	0.930435	0.326087
0.176587	0.406746	0.416667	0.131213	0.11332	0.353877	0.009921	0.303571	0.617063	0.793651	1	0.005952	0.228175	0.46627	0.702381	0.998016	0.001984	0.251984	0.501984	0.75	0.978175	0.202381	0.015873	0.781746	0.005964	0.073559	0.00994	0.001984	0.234127	0.472222	0.734127	1	0.069444	0.071429	0.511905	0.517857	0.52381	0.009921	0.257937	0.498016	0.753968	0.996032	0.793651	0.163022	0.011905	0.246032	0.494048	0.744048	0.992063	0.396825
0.315013	0.449062	0.235925	0.277852	0.151678	0.22953	0.005362	0.253351	0.461126	0.738606	0.986595	0.002681	0.252011	0.510724	0.760054	0.99866	0.00134	0.226542	0.509383	0.753351	1	0.616622	0.327078	0.0563	0.100671	0.01745	0.001342	0.00134	0.260054	0.474531	0.707775	1	0.050938	0.355228	0.604558	0.812332	0.99866	0.010724	0.022788	0.081769	0.103217	0.664879	0.581769	0.34094	0.008043	0.233244	0.514745	0.734584	0.997319	0.44504
0.198178	0.382688	0.419134	0.180365	0.111872	0.349315	0.006834	0.29385	0.473804	0.77221	0.995444	0.004556	0.202733	0.460137	0.726651	0.993166	0.002278	0.264237	0.537585	0.738041	1	0.198178	0.01139	0.790433	0.004566	0.082192	0	0.002278	0.271071	0.507973	0.931663	1	0.77221	0.77221	0.774487	0.776765	0.781321	0.018223	0.232346	0.47836	0.703872	0.961276	0.810934	0.13242	0.013667	0.236902	0.476082	0.735763	0.993166	0.378132
0.353783	0.321063	0.325153	0.182377	0.227459	0.237705	0.00409	0.269939	0.492843	0.705521	0.997955	0.014315	0.226994	0.543967	0.777096	1	0.002045	0.231084	0.445808	0.766871	0.993865	0.390593	0.184049	0.425358	0.061475	0.053279	0	0.002045	0.298569	0.527607	0.707566	1	0.102249	0.353783	0.560327	0.689162	0.803681	0.00409	0.141104	0.466258	0.858896	0.99591	0.429448	0.368852	0.00818	0.247444	0.445808	0.764826	0.993865	0.331288
0.323077	0.351282	0.325641	0.228792	0.228792	0.275064	0.012821	0.302564	0.548718	0.792308	0.997436	0.005128	0.215385	0.474359	0.720513	0.994872	0.002564	0.228205	0.461538	0.717949	1	0.366667	0.171795	0.461538	0.061697	0.061697	0	0.002564	0.407692	0.574359	0.779487	1	0.415385	0.464103	0.587179	0.769231	0.976923	0.038462	0.176923	0.307692	0.723077	0.953846	0.571795	0.411311	0.017949	0.282051	0.546154	0.75641	0.984615	0.333333
0.350598	0.378486	0.270916	0.25266	0.18883	0.202128	0.003984	0.209827	0.478088	0.737052	0.998672	0.002656	0.306773	0.492696	0.711819	0.994688	0.001328	0.184595	0.553785	0.776892	1	0.609562	0.215139	0.175299	0.081117	0.041223	0.011968	0.001328	0.326693	0.49668	0.734396	1	0.007968	0.36255	0.661355	0.819389	0.933599	0.01328	0.055777	0.160691	0.447543	0.992032	0.363878	0.356383	0.00664	0.24834	0.594954	0.810093	0.99336	0.411687
0.28581	0.464525	0.249665	0.241125	0.141326	0.242465	0.001339	0.283802	0.598394	0.822624	1	0.002008	0.240295	0.455823	0.703481	0.999331	0.000669	0.239625	0.503347	0.731593	0.998661	0.710843	0.080321	0.208835	0.048895	0.042197	0.002009	0.000669	0.226908	0.457831	0.711513	1	0.012718	0.186747	0.555556	0.76573	0.986613	0.029451	0.430388	0.657296	0.851406	0.981928	0.439759	0.407234	0.004685	0.240964	0.507363	0.733601	0.991968	0.465863
0.230769	0.444444	0.324786	0.267241	0.163793	0.275862	0.042735	0.264957	0.529915	0.74359	0.991453	0.025641	0.247863	0.521368	0.752137	1	0.008547	0.205128	0.401709	0.700855	0.940171	0.299145	0.333333	0.367521	0.077586	0.043103	0.008621	0.008547	0.102564	0.649573	0.871795	1	0.042735	0.179487	0.264957	0.82906	0.931624	0.273504	0.350427	0.478632	0.57265	0.777778	0.623932	0.37931	0.017094	0.247863	0.435897	0.709402	0.940171	0.435897
0.297753	0.303371	0.398876	0.158192	0.248588	0.259887	0.011236	0.314607	0.449438	0.724719	0.994382	0.016854	0.174157	0.494382	0.696629	0.988764	0.005618	0.241573	0.477528	0.792135	1	0.516854	0.151685	0.331461	0.050847	0.118644	0.00565	0.005618	0.213483	0.449438	0.730337	1	0.230337	0.38764	0.426966	0.494382	0.926966	0.101124	0.202247	0.58427	0.876404	0.994382	0.55618	0.40678	0.016854	0.258427	0.505618	0.752809	0.983146	0.275281
0.229167	0.475	0.295833	0.246862	0.129707	0.288703	0.0125	0.220833	0.4625	0.7375	0.9875	0.008333	0.208333	0.45	0.754167	0.995833	0.004167	0.3	0.545833	0.725	1	0.420833	0.2	0.379167	0.096234	0.096234	0.004184	0.004167	0.283333	0.525	0.825	1	0.0125	0.166667	0.466667	0.6125	0.85	0.066667	0.254167	0.4375	0.683333	0.9625	0.6125	0.334728	0.016667	0.233333	0.495833	0.7	0.9875	0.470833
0.261097	0.438642	0.300261	0.219895	0.159686	0.219895	0.020888	0.336815	0.590078	0.775457	1	0.013055	0.18799	0.464752	0.736292	0.997389	0.002611	0.234987	0.467363	0.72846	0.979112	0.45953	0.266319	0.274151	0.146597	0.073298	0.005236	0.002611	0.27154	0.498695	0.762402	1	0.015666	0.279373	0.469974	0.712794	0.89295	0.007833	0.18799	0.516971	0.817232	0.986945	0.532637	0.403141	0.005222	0.203655	0.472585	0.738903	0.971279	0.472585
0.226415	0.311321	0.462264	0.152381	0.209524	0.314286	0.018868	0.141509	0.443396	0.556604	0.915094	0.113208	0.264151	0.566038	0.726415	1	0.009434	0.283019	0.5	0.783019	0.990566	0.386792	0.103774	0.509434	0.057143	0.057143	0	0.009434	0.169811	0.490566	0.792453	1	0.839623	0.849057	0.90566	0.933962	0.981132	0.04717	0.273585	0.40566	0.584906	0.716981	0.716981	0.266667	0.028302	0.283019	0.575472	0.754717	0.971698	0.301887
0.305606	0.390597	0.303797	0.23913	0.184783	0.262681	0.009042	0.251356	0.466546	0.76311	0.998192	0.005425	0.267631	0.522604	0.746835	1	0.001808	0.22604	0.475588	0.74141	0.996383	0.358047	0.173599	0.468354	0.085145	0.088768	0.001812	0.001808	0.265823	0.392405	0.701627	1	0.128391	0.191682	0.307414	0.555154	0.750452	0.005425	0.39783	0.589512	0.83906	0.998192	0.683544	0.311594	0.003617	0.271248	0.513562	0.721519	0.996383	0.405063
0.140281	0.44489	0.41483	0.118474	0.104418	0.427711	0.01002	0.200401	0.513026	0.731463	1	0.004008	0.278557	0.501002	0.769539	0.997996	0.002004	0.234469	0.482966	0.727455	0.993988	0.238477	0.094188	0.667335	0.032129	0.072289	0.024096	0.002004	0.202405	0.629259	0.779559	1	0.064128	0.102204	0.178357	0.683367	0.96994	0.012024	0.292585	0.517034	0.749499	0.985972	0.833667	0.172691	0.008016	0.244489	0.492986	0.731463	0.96994	0.428858
0.279793	0.378238	0.341969	0.179221	0.215584	0.254545	0.005181	0.272021	0.541451	0.766839	0.994819	0.012953	0.212435	0.494819	0.722798	1	0.002591	0.279793	0.492228	0.761658	0.997409	0.458549	0.292746	0.248705	0.116883	0.054545	0.007792	0.002591	0.139896	0.455959	0.699482	1	0.07772	0.259067	0.489637	0.715026	0.994819	0.049223	0.326425	0.595855	0.813472	0.966321	0.601036	0.374026	0.010363	0.261658	0.502591	0.696891	0.997409	0.411917
0.347727	0.352273	0.3	0.216401	0.236902	0.202733	0.006818	0.172727	0.406818	0.711364	1	0.004545	0.325	0.522727	0.768182	0.984091	0.002273	0.263636	0.515909	0.75	0.995455	0.379545	0.152273	0.468182	0.059226	0.082005	0.009112	0.002273	0.263636	0.490909	0.809091	1	0.025	0.293182	0.443182	0.720455	0.920455	0.052273	0.213636	0.518182	0.745455	0.993182	0.615909	0.396355	0.013636	0.347727	0.556818	0.779545	0.995455	0.356818
0.192982	0.561404	0.245614	0.196429	0.160714	0.25	0.263158	0.368421	0.596491	0.684211	0.912281	0.035088	0.175439	0.350877	0.719298	1	0.017544	0.315789	0.578947	0.736842	0.964912	0.807018	0.140351	0.052632	0.035714	0.035714	0	0.017544	0.192982	0.45614	0.789474	1	0.596491	0.614035	0.649123	0.684211	0.719298	0.350877	0.350877	0.350877	0.368421	0.385965	0.350877	0.464286	0.070175	0.350877	0.578947	0.807018	0.964912	0.526316
0.371681	0.389381	0.238938	0.232143	0.071429	0.214286	0.017699	0.318584	0.486726	0.637168	0.973451	0.079646	0.371681	0.610619	0.787611	0.982301	0.00885	0.070796	0.168142	0.707965	1	0.345133	0	0.654867	0	0.053571	0	0.00885	0.60177	0.823009	0.911504	1	0	0	0	0	0	0.026549	0.176991	0.345133	0.530973	0.743363	0.469027	0.142857	0.026549	0.150442	0.265487	0.761062	0.911504	0.097345
0.314488	0.35689	0.328622	0.216312	0.223404	0.258865	0.007067	0.212014	0.420495	0.738516	0.982332	0.014134	0.279152	0.522968	0.727915	0.996466	0.003534	0.219081	0.54417	0.756184	1	0.413428	0.24735	0.339223	0.092199	0.078014	0.014184	0.003534	0.187279	0.416961	0.830389	1	0.060071	0.431095	0.621908	0.770318	0.996466	0.007067	0.229682	0.452297	0.696113	0.929329	0.607774	0.340426	0.014134	0.226148	0.522968	0.70318	0.992933	0.363958
0.276265	0.466926	0.256809	0.253906	0.167969	0.214844	0.011673	0.256809	0.44358	0.750973	0.996109	0.019455	0.237354	0.51751	0.727626	0.988327	0.003891	0.22179	0.459144	0.743191	1	0.466926	0.280156	0.252918	0.109375	0.054688	0.03125	0.003891	0.280156	0.579767	0.789883	1	0.089494	0.478599	0.603113	0.770428	0.996109	0.007782	0.066148	0.210117	0.420233	0.972763	0.677043	0.351562	0.019455	0.233463	0.494163	0.715953	0.992218	0.44358
0.38	0.34	0.28	0.326531	0.183673	0.204082	0.12	0.22	0.52	0.72	1	0.08	0.24	0.48	0.74	0.96	0.02	0.06	0.32	0.62	0.9	0.54	0.04	0.42	0.020408	0.142857	0.020408	0.02	0.2	0.42	0.64	1	0.3	0.3	0.3	0.3	0.32	0.12	0.26	0.5	0.82	0.94	0.32	0.489796	0.06	0.18	0.32	0.62	0.9	0.38
0.294671	0.410658	0.294671	0.235849	0.160377	0.251572	0.009404	0.213166	0.523511	0.746082	0.996865	0.00627	0.272727	0.514107	0.752351	1	0.003135	0.238245	0.448276	0.724138	0.978056	0.451411	0.263323	0.285266	0.128931	0.059748	0.009434	0.003135	0.272727	0.495298	0.802508	1	0.009404	0.266458	0.479624	0.783699	0.974922	0.034483	0.219436	0.514107	0.61442	0.978056	0.570533	0.371069	0.00627	0.266458	0.448276	0.717868	0.978056	0.407524
0.188679	0.320755	0.490566	0.192308	0.057692	0.346154	0.09434	0.113208	0.54717	0.90566	1	0.037736	0.207547	0.45283	0.716981	0.981132	0.018868	0.245283	0.433962	0.660377	0.849057	0.113208	0	0.886792	0	0.038462	0	0.018868	0.018868	0.943396	0.962264	1	0	0	0	0	0	0.056604	0.245283	0.471698	0.698113	0.924528	0.415094	0.269231	0.150943	0.377358	0.490566	0.716981	0.886792	0.301887
0.333333	0.400585	0.266082	0.237537	0.167155	0.222874	0.008772	0.307018	0.502924	0.774854	0.994152	0.005848	0.248538	0.538012	0.777778	1	0.002924	0.181287	0.380117	0.684211	0.997076	0.549708	0.032164	0.418129	0.017595	0.046921	0	0.002924	0.502924	0.672515	0.862573	1	0.678363	0.681287	0.690058	0.745614	0.836257	0.011696	0.131579	0.248538	0.359649	0.766082	0.453216	0.234604	0.011696	0.210526	0.473684	0.681287	0.997076	0.400585
0.322034	0.338983	0.338983	0.217021	0.238298	0.251064	0.012712	0.292373	0.491525	0.809322	1	0.008475	0.194915	0.483051	0.711864	0.995763	0.004237	0.216102	0.512712	0.775424	0.991525	0.415254	0.351695	0.233051	0.13617	0.059574	0.008511	0.004237	0.220339	0.457627	0.720339	1	0.033898	0.283898	0.525424	0.754237	0.889831	0.025424	0.114407	0.436441	0.915254	0.991525	0.580508	0.417021	0.016949	0.20339	0.483051	0.720339	0.983051	0.360169
0.308869	0.360856	0.330275	0.248466	0.205521	0.257669	0.018349	0.253823	0.477064	0.730887	0.987768	0.015291	0.24159	0.556575	0.785933	1	0.003058	0.223242	0.480122	0.724771	0.990826	0.486239	0.207951	0.30581	0.092025	0.07362	0	0.003058	0.266055	0.550459	0.737003	1	0.006116	0.330275	0.666667	0.75841	0.862385	0.033639	0.214067	0.41896	0.507645	0.993884	0.53211	0.361963	0.006116	0.321101	0.553517	0.749235	0.990826	0.379205
0.384146	0.280488	0.335366	0.165644	0.288344	0.153374	0.02439	0.347561	0.54878	0.768293	0.981707	0.012195	0.140244	0.445122	0.670732	0.993902	0.006098	0.170732	0.457317	0.731707	1	0.384146	0	0.615854	0	0.09816	0	0.006098	0.268293	0.530488	0.902439	1	0	0	0	0	0	0.02439	0.22561	0.481707	0.689024	0.884146	0.47561	0.355828	0.018293	0.134146	0.378049	0.609756	0.890244	0.323171
0.283784	0.385135	0.331081	0.213559	0.183051	0.281356	0.010135	0.358108	0.550676	0.743243	1	0.006757	0.243243	0.466216	0.760135	0.996622	0.003378	0.199324	0.449324	0.702703	0.986486	0.432432	0.084459	0.483108	0.047458	0.074576	0.013559	0.003378	0.141892	0.35473	0.675676	1	0.023649	0.070946	0.148649	0.293919	0.983108	0.185811	0.432432	0.601351	0.831081	0.969595	0.550676	0.386441	0.02027	0.22973	0.47973	0.763514	0.986486	0.449324
0.28125	0.2875	0.43125	0.169811	0.106918	0.245283	0.025	0.21875	0.63125	0.8875	0.975	0.0125	0.2125	0.48125	0.675	0.98125	0.00625	0.26875	0.45	0.7375	1	0.35625	0.1125	0.53125	0.044025	0.081761	0.006289	0.00625	0.0875	0.54375	0.66875	1	0.38125	0.43125	0.4625	0.5	0.5875	0.1	0.23125	0.375	0.8	0.9875	0.5375	0.238994	0.01875	0.26875	0.4375	0.7125	0.875	0.31875
0.351047	0.323671	0.325282	0.193548	0.232258	0.241935	0.008052	0.2657	0.515298	0.748792	0.996779	0.003221	0.21095	0.457327	0.718196	0.99839	0.00161	0.26248	0.52496	0.753623	1	0.454106	0.165862	0.380032	0.059677	0.072581	0.001613	0.00161	0.249597	0.457327	0.708535	1	0.008052	0.214171	0.426731	0.73913	0.922705	0.027375	0.251208	0.568438	0.835749	0.995169	0.52496	0.383871	0.009662	0.230274	0.518519	0.768116	0.991948	0.342995
0.316522	0.387826	0.295652	0.264808	0.189895	0.216028	0.008696	0.198261	0.485217	0.754783	1	0.005217	0.290435	0.514783	0.756522	0.998261	0.001739	0.234783	0.476522	0.716522	0.987826	0.408696	0.166957	0.424348	0.06446	0.067944	0.008711	0.001739	0.264348	0.558261	0.78087	1	0.107826	0.344348	0.547826	0.773913	0.975652	0.005217	0.231304	0.431304	0.653913	0.96	0.615652	0.397213	0.003478	0.29913	0.506087	0.76	0.991304	0.389565
0.275109	0.436681	0.28821	0.201754	0.192982	0.25	0.0131	0.257642	0.449782	0.764192	0.995633	0.008734	0.213974	0.471616	0.733624	1	0.004367	0.292576	0.524017	0.742358	0.991266	0.528384	0.122271	0.349345	0.065789	0.074561	0.013158	0.004367	0.209607	0.432314	0.69869	1	0.270742	0.305677	0.353712	0.50655	0.620087	0.10917	0.362445	0.655022	0.860262	0.995633	0.580786	0.315789	0.030568	0.28821	0.519651	0.707424	0.991266	0.471616
0.338235	0.336397	0.325368	0.232044	0.233886	0.202578	0.009191	0.266544	0.487132	0.71875	1	0.005515	0.233456	0.558824	0.797794	0.996324	0.001838	0.240809	0.454044	0.707721	0.990809	0.345588	0.132353	0.522059	0.064457	0.060773	0.001842	0.001838	0.268382	0.527574	0.755515	1	0.014706	0.395221	0.538603	0.665441	0.882353	0.036765	0.227941	0.492647	0.779412	0.961397	0.566176	0.372007	0.012868	0.238971	0.534926	0.755515	0.963235	0.376838
0.292614	0.40625	0.301136	0.267806	0.179487	0.239316	0.011364	0.224432	0.511364	0.772727	1	0.005682	0.241477	0.465909	0.730114	0.994318	0.002841	0.255682	0.505682	0.738636	0.960227	0.394886	0.136364	0.46875	0.059829	0.094017	0.002849	0.002841	0.303977	0.522727	0.786932	1	0.056818	0.176136	0.505682	0.772727	0.880682	0.017045	0.227273	0.460227	0.71875	0.985795	0.545455	0.353276	0.022727	0.289773	0.539773	0.727273	0.940341	0.440341
0.28022	0.470696	0.249084	0.229358	0.152294	0.214679	0.003663	0.208791	0.443223	0.695971	0.994505	0.005495	0.283883	0.582418	0.794872	0.998168	0.001832	0.234432	0.412088	0.68315	1	0.716117	0.159341	0.124542	0.06789	0.049541	0.009174	0.001832	0.28022	0.580586	0.79304	1	0.084249	0.300366	0.404762	0.628205	0.994505	0.069597	0.130037	0.214286	0.351648	0.996337	0.408425	0.388991	0.025641	0.225275	0.388278	0.68315	0.996337	0.492674
0.329806	0.417989	0.252205	0.273852	0.178445	0.215548	0.010582	0.229277	0.511464	0.72134	0.991182	0.003527	0.227513	0.455026	0.737213	1	0.001764	0.328042	0.530864	0.795414	0.989418	0.611993	0.17284	0.215168	0.070671	0.056537	0.007067	0.001764	0.186949	0.363316	0.645503	1	0.008818	0.388007	0.661376	0.733686	0.964727	0.040564	0.463845	0.654321	0.811287	0.9806	0.497354	0.339223	0.003527	0.312169	0.54321	0.786596	0.975309	0.432099
0.188976	0.377953	0.433071	0.114625	0.12253	0.343874	0.007874	0.30315	0.515748	0.779528	0.988189	0.027559	0.216535	0.46063	0.692913	0.996063	0.003937	0.271654	0.511811	0.759843	1	0.232283	0.047244	0.720472	0.019763	0.067194	0.003953	0.003937	0.066929	0.46063	0.69685	1	0.031496	0.03937	0.492126	0.503937	0.992126	0.090551	0.279528	0.531496	0.759843	0.96063	0.744094	0.150198	0.027559	0.291339	0.503937	0.740157	0.972441	0.334646
0.317935	0.36413	0.317935	0.234332	0.20436	0.245232	0.024457	0.277174	0.532609	0.766304	1	0.005435	0.26087	0.486413	0.733696	0.975543	0.002717	0.209239	0.464674	0.725543	0.997283	0.355978	0.11413	0.529891	0.046322	0.122616	0.002725	0.002717	0.19837	0.478261	0.8125	1	0.008152	0.078804	0.190217	0.817935	0.986413	0.046196	0.309783	0.55163	0.722826	0.956522	0.595109	0.392371	0.008152	0.184783	0.432065	0.709239	0.983696	0.339674
0.319027	0.361946	0.319027	0.229226	0.197708	0.239255	0.004292	0.237482	0.500715	0.762518	0.998569	0.002861	0.264664	0.527897	0.752504	1	0.001431	0.224607	0.454936	0.723891	0.997139	0.420601	0.088698	0.490701	0.031519	0.091691	0.011461	0.001431	0.276109	0.60515	0.778255	1	0.480687	0.609442	0.729614	0.875536	0.965665	0.025751	0.2103	0.366237	0.596567	0.997139	0.55794	0.361032	0.014306	0.238913	0.460658	0.702432	0.997139	0.389127
0.274463	0.365155	0.360382	0.208134	0.174641	0.272727	0.004773	0.164678	0.47494	0.718377	0.997613	0.01432	0.28401	0.546539	0.749403	1	0.002387	0.224344	0.463007	0.768496	0.983294	0.410501	0.198091	0.391408	0.052632	0.062201	0.009569	0.002387	0.24105	0.486874	0.637232	1	0.019093	0.205251	0.315036	0.601432	0.854415	0.062053	0.365155	0.73747	0.866348	0.98568	0.615752	0.301435	0.02148	0.231504	0.448687	0.739857	0.983294	0.374702
0.320588	0.388235	0.291176	0.212389	0.176991	0.259587	0.005882	0.191176	0.467647	0.691176	0.997059	0.008824	0.329412	0.567647	0.776471	0.994118	0.002941	0.197059	0.435294	0.755882	1	0.464706	0.158824	0.376471	0.091445	0.073746	0.00295	0.002941	0.323529	0.526471	0.752941	1	0.238235	0.676471	0.847059	0.891176	0.997059	0.011765	0.117647	0.282353	0.541176	0.970588	0.573529	0.353982	0.008824	0.261765	0.517647	0.779412	0.991176	0.397059
0.22542	0.393285	0.381295	0.173077	0.132212	0.307692	0.004796	0.201439	0.606715	0.83693	1	0.007194	0.227818	0.458034	0.664269	0.997602	0.002398	0.266187	0.496403	0.729017	0.992806	0.410072	0.047962	0.541966	0.016827	0.060096	0.002404	0.002398	0.100719	0.510791	0.817746	1	0.261391	0.270983	0.482014	0.503597	0.98801	0.119904	0.306954	0.460432	0.695444	0.952038	0.669065	0.158654	0.009592	0.261391	0.460432	0.705036	0.992806	0.393285
0.329759	0.412869	0.257373	0.25	0.217742	0.204301	0.008043	0.297587	0.504021	0.769437	0.997319	0.010724	0.19571	0.490617	0.747989	1	0.002681	0.284182	0.487936	0.702413	0.994638	0.474531	0.088472	0.436997	0.032258	0.086022	0	0.002681	0.182306	0.469169	0.764075	1	0.447721	0.487936	0.522788	0.619303	0.879357	0.013405	0.243968	0.420912	0.715818	0.994638	0.485255	0.376344	0.013405	0.340483	0.541555	0.713137	0.994638	0.407507
0.319444	0.412037	0.268519	0.232558	0.172093	0.24186	0.009259	0.25463	0.486111	0.657407	1	0.018519	0.305556	0.550926	0.805556	0.99537	0.00463	0.171296	0.453704	0.699074	0.986111	0.578704	0.296296	0.125	0.093023	0.027907	0	0.00463	0.328704	0.546296	0.736111	1	0.134259	0.24537	0.606481	0.884259	0.99537	0.013889	0.037037	0.069444	0.277778	0.532407	0.444444	0.427907	0.018519	0.166667	0.467593	0.722222	0.99537	0.430556
0.243056	0.460648	0.296296	0.215777	0.150812	0.292343	0.023148	0.314815	0.525463	0.773148	0.99537	0.00463	0.222222	0.467593	0.719907	1	0.002315	0.231481	0.490741	0.756944	0.997685	0.622685	0.263889	0.113426	0.095128	0.011601	0.00232	0.002315	0.256944	0.509259	0.756944	1	0.081019	0.243056	0.435185	0.590278	0.789352	0.016204	0.041667	0.858796	0.886574	0.916667	0.462963	0.399072	0.011574	0.233796	0.490741	0.722222	0.981481	0.490741
0.353383	0.315789	0.330827	0.184906	0.196226	0.25283	0.018797	0.259398	0.522556	0.804511	1	0.007519	0.263158	0.488722	0.672932	0.996241	0.003759	0.221805	0.466165	0.744361	0.992481	0.503759	0.135338	0.360902	0.05283	0.090566	0	0.003759	0.199248	0.43985	0.669173	1	0.011278	0.071429	0.176692	0.778195	0.902256	0.041353	0.394737	0.609023	0.845865	0.992481	0.62782	0.34717	0.011278	0.285714	0.507519	0.718045	0.992481	0.319549
0.283146	0.391011	0.325843	0.220721	0.184685	0.261261	0.008989	0.25618	0.501124	0.782022	0.991011	0.004494	0.21573	0.469663	0.692135	0.997753	0.002247	0.269663	0.523596	0.761798	1	0.431461	0.177528	0.391011	0.087838	0.060811	0.006757	0.002247	0.233708	0.420225	0.67191	1	0.060674	0.188764	0.478652	0.658427	0.932584	0.011236	0.262921	0.602247	0.78427	0.993258	0.680899	0.297297	0.011236	0.258427	0.503371	0.707865	0.986517	0.395506
0.5	0.252381	0.247619	0.248804	0.272727	0.124402	0.019048	0.261905	0.533333	0.757143	1	0.014286	0.185714	0.37619	0.738095	0.952381	0.004762	0.271429	0.514286	0.728571	0.985714	0.52381	0.057143	0.419048	0.033493	0.110048	0.004785	0.004762	0.152381	0.380952	0.690476	1	0.371429	0.57619	0.671429	0.752381	0.766667	0.019048	0.309524	0.509524	0.852381	0.990476	0.319048	0.449761	0.042857	0.271429	0.509524	0.714286	0.985714	0.319048
0.170732	0.463415	0.365854	0.246914	0.098765	0.333333	0.02439	0.243902	0.463415	0.756098	0.95122	0.134146	0.329268	0.536585	0.743902	1	0.012195	0.097561	0.365854	0.670732	0.926829	0.695122	0.073171	0.231707	0.037037	0.037037	0.012346	0.012195	0.353659	0.52439	0.695122	1	0.036585	0.036585	0.060976	0.073171	0.939024	0.097561	0.134146	0.195122	0.780488	0.841463	0.536585	0.469136	0.036585	0.170732	0.341463	0.682927	0.939024	0.5
0.366154	0.332308	0.301538	0.211094	0.20339	0.208012	0.006154	0.287692	0.566154	0.8	1	0.003077	0.243077	0.435385	0.666154	0.996923	0.001538	0.238462	0.518462	0.718462	0.993846	0.490769	0.143077	0.366154	0.05547	0.067797	0.003082	0.001538	0.209231	0.378462	0.609231	1	0.153846	0.301538	0.575385	0.718462	0.996923	0.010769	0.384615	0.649231	0.789231	0.976923	0.455385	0.412943	0.013846	0.258462	0.503077	0.681538	0.993846	0.367692
0.322785	0.367089	0.310127	0.203822	0.191083	0.210191	0.031646	0.158228	0.56962	0.727848	0.892405	0.012658	0.259494	0.43038	0.613924	1	0.006329	0.335443	0.544304	0.803797	0.987342	0.329114	0.107595	0.563291	0.044586	0.082803	0.019108	0.006329	0.082278	0.259494	0.398734	1	0.132911	0.35443	0.379747	0.632911	0.917722	0.14557	0.443038	0.582278	0.791139	0.981013	0.56962	0.305732	0.025316	0.348101	0.506329	0.78481	0.987342	0.373418
0.309859	0.295775	0.394366	0.157143	0.3	0.257143	0.070423	0.225352	0.492958	0.676056	0.887324	0.042254	0.197183	0.478873	0.746479	1	0.014085	0.239437	0.450704	0.704225	0.957746	0.56338	0.295775	0.140845	0.128571	0.042857	0.014286	0.014085	0.211268	0.450704	0.690141	1	0.084507	0.140845	0.56338	0.873239	0.957746	0.323944	0.338028	0.380282	0.408451	0.760563	0.464789	0.371429	0.084507	0.366197	0.56338	0.788732	0.971831	0.309859
0.307002	0.378815	0.314183	0.246403	0.203237	0.23741	0.003591	0.262118	0.509874	0.770197	0.980251	0.008977	0.192101	0.438061	0.732496	1	0.001795	0.283662	0.533214	0.743268	0.996409	0.439856	0.093357	0.466786	0.05036	0.079137	0	0.001795	0.177738	0.394973	0.685817	1	0.055655	0.201077	0.310592	0.375224	0.994614	0.016158	0.416517	0.640934	0.81149	0.980251	0.606822	0.298561	0.008977	0.236984	0.473968	0.664273	0.996409	0.393178
0.226087	0.347826	0.426087	0.149123	0.210526	0.359649	0.034783	0.278261	0.478261	0.8	1	0.017391	0.269565	0.530435	0.73913	0.973913	0.008696	0.165217	0.434783	0.686957	0.991304	0.347826	0.052174	0.6	0.008772	0.096491	0.008772	0.008696	0.313043	0.73913	0.826087	1	0.904348	0.904348	0.921739	0.930435	0.947826	0.026087	0.165217	0.391304	0.6	0.895652	0.704348	0.263158	0.026087	0.2	0.53913	0.713043	0.956522	0.286957
0.309278	0.319588	0.371134	0.197917	0.1875	0.239583	0.061856	0.206186	0.628866	0.804124	1	0.020619	0.237113	0.536082	0.71134	0.958763	0.010309	0.268041	0.412371	0.556701	0.989691	0.381443	0.154639	0.463918	0.083333	0.041667	0	0.010309	0.14433	0.608247	0.701031	1	0.041237	0.061856	0.175258	0.948454	0.989691	0.257732	0.360825	0.474227	0.587629	0.835052	0.443299	0.375	0.030928	0.28866	0.453608	0.597938	0.969072	0.350515
0.355388	0.302457	0.342155	0.1875	0.265152	0.210227	0.011342	0.238185	0.529301	0.765595	1	0.005671	0.277883	0.514178	0.754253	0.994329	0.00189	0.234405	0.459357	0.718336	0.996219	0.453686	0.268431	0.277883	0.073864	0.054924	0.00947	0.00189	0.194707	0.478261	0.703214	1	0.045369	0.402647	0.659735	0.867675	0.982987	0.011342	0.234405	0.361059	0.614367	0.952741	0.493384	0.416667	0.007561	0.274102	0.542533	0.744802	0.990548	0.330813
0.420382	0.33758	0.242038	0.223642	0.204473	0.182109	0.006369	0.299363	0.522293	0.732484	0.996815	0.009554	0.136943	0.353503	0.694268	1	0.003185	0.347134	0.570064	0.799363	0.990446	0.369427	0.015924	0.61465	0.009585	0.111821	0.003195	0.003185	0.095541	0.509554	0.808917	1	0.783439	0.783439	0.786624	0.789809	0.815287	0.019108	0.286624	0.474522	0.675159	0.977707	0.452229	0.389776	0.044586	0.296178	0.547771	0.799363	0.990446	0.353503
0.293269	0.377404	0.329327	0.207229	0.19759	0.255422	0.012019	0.233173	0.480769	0.762019	0.990385	0.004808	0.21875	0.46875	0.721154	0.997596	0.002404	0.264423	0.524038	0.747596	1	0.415865	0.161058	0.423077	0.074699	0.084337	0.012048	0.002404	0.165865	0.463942	0.649038	1	0.086538	0.370192	0.519231	0.822115	0.995192	0.024038	0.240385	0.492788	0.774038	0.992788	0.663462	0.375904	0.014423	0.286058	0.516827	0.735577	0.995192	0.399038
0.290323	0.274194	0.435484	0.147541	0.245902	0.131148	0.032258	0.354839	0.532258	0.677419	0.967742	0.177419	0.387097	0.564516	0.774194	1	0.016129	0.112903	0.258065	0.693548	0.983871	0.516129	0.129032	0.354839	0.032787	0.098361	0	0.016129	0.354839	0.5	0.629032	1	0.854839	0.870968	0.903226	0.935484	0.967742	0.048387	0.112903	0.209677	0.645161	0.741935	0.548387	0.42623	0.048387	0.16129	0.306452	0.645161	0.983871	0.403226
0.268817	0.4	0.331183	0.226293	0.178879	0.284483	0.004301	0.249462	0.458065	0.72043	0.989247	0.006452	0.236559	0.492473	0.737634	1	0.002151	0.253763	0.533333	0.772043	0.995699	0.466667	0.124731	0.408602	0.047414	0.086207	0	0.002151	0.215054	0.486022	0.683871	1	0.352688	0.470968	0.582796	0.83871	0.950538	0.023656	0.219355	0.44086	0.780645	0.995699	0.666667	0.327586	0.010753	0.275269	0.535484	0.737634	0.993548	0.395699
0.326316	0.363158	0.310526	0.222222	0.21164	0.21164	0.010526	0.4	0.636842	0.805263	0.973684	0.015789	0.126316	0.342105	0.578947	0.994737	0.005263	0.252632	0.494737	0.757895	1	0.473684	0.005263	0.521053	0.010582	0.095238	0	0.005263	0.126316	0.305263	0.873684	1	0.905263	0.905263	0.905263	0.905263	0.905263	0.036842	0.363158	0.510526	0.673684	0.836842	0.515789	0.380952	0.047368	0.326316	0.526316	0.7	0.989474	0.405263
0.338762	0.359935	0.301303	0.226754	0.185971	0.233279	0.016287	0.271987	0.555375	0.798046	1	0.006515	0.239414	0.464169	0.700326	0.996743	0.001629	0.232899	0.488599	0.747557	0.995114	0.384365	0.175896	0.439739	0.066884	0.08646	0.004894	0.001629	0.271987	0.459283	0.736156	1	0.003257	0.174267	0.335505	0.441368	0.985342	0.021173	0.258958	0.625407	0.809446	0.986971	0.571661	0.384992	0.004886	0.221498	0.477199	0.728013	0.995114	0.379479
0.280769	0.411538	0.307692	0.200772	0.200772	0.250965	0.011538	0.269231	0.515385	0.738462	0.992308	0.007692	0.230769	0.496154	0.746154	1	0.003846	0.25	0.473077	0.734615	0.996154	0.373077	0.165385	0.461538	0.054054	0.084942	0	0.003846	0.238462	0.55	0.788462	1	0.05	0.157692	0.361538	0.588462	0.976923	0.023077	0.292308	0.484615	0.692308	0.923077	0.638462	0.316602	0.023077	0.273077	0.542308	0.734615	0.976923	0.430769
0.366667	0.305556	0.327778	0.178771	0.234637	0.24581	0.011111	0.266667	0.444444	0.7	0.994444	0.038889	0.233333	0.511111	0.688889	0.977778	0.005556	0.172222	0.577778	0.788889	1	0.533333	0.083333	0.383333	0.055866	0.067039	0.011173	0.005556	0.294444	0.527778	0.683333	1	0.016667	0.238889	0.383333	0.583333	0.988889	0.022222	0.161111	0.466667	0.777778	0.883333	0.438889	0.346369	0.016667	0.244444	0.533333	0.805556	0.988889	0.25
0.30033	0.359736	0.339934	0.215232	0.211921	0.254967	0.013201	0.181518	0.554455	0.775578	1	0.006601	0.231023	0.438944	0.676568	0.9967	0.0033	0.273927	0.508251	0.772277	0.976898	0.518152	0.30033	0.181518	0.119205	0.05298	0	0.0033	0.313531	0.481848	0.712871	1	0.009901	0.343234	0.613861	0.881188	0.976898	0.033003	0.072607	0.234323	0.541254	0.825083	0.547855	0.390728	0.009901	0.264026	0.49835	0.739274	0.976898	0.353135
0.281046	0.457516	0.261438	0.243421	0.131579	0.296053	0.013072	0.281046	0.581699	0.751634	1	0.019608	0.27451	0.503268	0.764706	0.973856	0.006536	0.169935	0.398693	0.653595	0.947712	0.248366	0.013072	0.738562	0.019737	0.085526	0.006579	0.006536	0.352941	0.54902	0.607843	1	0.620915	0.620915	0.620915	0.620915	0.980392	0.026144	0.228758	0.45098	0.764706	0.973856	0.457516	0.434211	0.026144	0.130719	0.385621	0.653595	0.973856	0.490196
0.357827	0.341853	0.300319	0.189103	0.176282	0.246795	0.009585	0.329073	0.597444	0.773163	0.984026	0.00639	0.230032	0.444089	0.750799	0.996805	0.003195	0.201278	0.389776	0.667732	1	0.530351	0.140575	0.329073	0.044872	0.064103	0.012821	0.003195	0.246006	0.501597	0.71885	1	0.067093	0.338658	0.571885	0.939297	0.990415	0.022364	0.223642	0.386581	0.722045	0.913738	0.412141	0.301282	0.015974	0.220447	0.386581	0.664537	0.98722	0.392971
0.328851	0.42176	0.249389	0.238678	0.187271	0.203182	0.002445	0.216381	0.424205	0.658924	0.997555	0.003667	0.297066	0.535452	0.734719	1	0.001222	0.231051	0.55868	0.808068	0.998778	0.595355	0.121027	0.283619	0.046512	0.066095	0.007344	0.001222	0.385086	0.546455	0.724939	1	0.310513	0.750611	0.839853	0.904645	0.99511	0.007335	0.081907	0.187042	0.265281	0.974328	0.40709	0.416157	0.00489	0.259169	0.627139	0.789731	0.99511	0.422983
0.366464	0.311021	0.322515	0.221922	0.228011	0.223275	0.002028	0.250169	0.509804	0.757945	1	0.001352	0.233266	0.494929	0.738337	0.995267	0.000676	0.265044	0.486815	0.753888	0.999324	0.4476	0.210277	0.342123	0.083897	0.062246	0.001353	0.000676	0.266396	0.51927	0.749155	1	0.002028	0.105477	0.415822	0.706558	0.998648	0.075727	0.2833	0.517918	0.759297	0.968222	0.59432	0.368065	0.002028	0.269777	0.495605	0.752535	0.999324	0.313049
0.315556	0.346667	0.337778	0.245536	0.21875	0.241071	0.008889	0.231111	0.488889	0.715556	0.995556	0.044444	0.266667	0.52	0.791111	1	0.004444	0.217778	0.462222	0.711111	0.991111	0.36	0.12	0.52	0.049107	0.09375	0.004464	0.004444	0.262222	0.591111	0.835556	1	0.013333	0.035556	0.617778	0.773333	0.942222	0.08	0.231111	0.395556	0.68	0.991111	0.542222	0.491071	0.013333	0.222222	0.511111	0.76	0.986667	0.377778
0.3	0.413043	0.286957	0.248908	0.161572	0.227074	0.073913	0.256522	0.530435	0.7	0.986957	0.008696	0.252174	0.465217	0.773913	1	0.004348	0.2	0.495652	0.734783	0.995652	0.434783	0.16087	0.404348	0.069869	0.087336	0	0.004348	0.226087	0.521739	0.778261	1	0.017391	0.134783	0.321739	0.634783	0.943478	0.056522	0.273913	0.547826	0.726087	0.982609	0.613043	0.331878	0.017391	0.26087	0.5	0.726087	0.995652	0.417391
0.25	0.371429	0.378571	0.170243	0.200286	0.307582	0.004286	0.205714	0.438571	0.692857	1	0.002857	0.267143	0.488571	0.731429	0.992857	0.001429	0.261429	0.548571	0.764286	0.998571	0.472857	0.128571	0.398571	0.062947	0.080114	0.011445	0.001429	0.195714	0.401429	0.725714	1	0.065714	0.167143	0.308571	0.621429	0.985714	0.008571	0.425714	0.612857	0.775714	0.997143	0.607143	0.337625	0.007143	0.294286	0.567143	0.742857	0.997143	0.384286
0.333333	0.388889	0.277778	0.314607	0.157303	0.269663	0.033333	0.222222	0.522222	0.777778	0.977778	0.022222	0.233333	0.488889	0.755556	0.944444	0.011111	0.155556	0.4	0.655556	1	0.277778	0	0.722222	0	0.11236	0	0.011111	0.066667	0.244444	0.488889	1	0	0	0	0	0	0.088889	0.322222	0.588889	0.777778	0.988889	0.411111	0.426966	0.044444	0.188889	0.411111	0.7	0.955556	0.333333
0.234742	0.488263	0.276995	0.20283	0.136792	0.245283	0.042254	0.347418	0.671362	0.830986	0.995305	0.00939	0.220657	0.441315	0.657277	1	0.004695	0.14554	0.478873	0.741784	0.985915	0.671362	0.15493	0.173709	0.066038	0.018868	0	0.004695	0.305164	0.502347	0.732394	1	0.394366	0.605634	0.699531	0.755869	0.985915	0.018779	0.056338	0.098592	0.140845	0.924883	0.610329	0.349057	0.018779	0.187793	0.441315	0.699531	0.985915	0.591549
0.133333	0.348148	0.518519	0.074627	0.141791	0.41791	0.022222	0.251852	0.481481	0.696296	1	0.051852	0.207407	0.503704	0.762963	0.992593	0.007407	0.22963	0.474074	0.711111	0.962963	0.192593	0.059259	0.748148	0.007463	0.052239	0.007463	0.007407	0.266667	0.688889	0.733333	1	0.77037	0.777778	0.792593	0.807407	0.822222	0.014815	0.192593	0.414815	0.607407	0.977778	0.755556	0.208955	0.014815	0.214815	0.422222	0.651852	0.97037	0.362963
0.330454	0.401728	0.267819	0.268398	0.17316	0.242424	0.008639	0.259179	0.457883	0.688985	0.991361	0.006479	0.233261	0.462203	0.723542	0.987041	0.00216	0.237581	0.600432	0.809935	1	0.518359	0.213823	0.267819	0.095238	0.056277	0	0.00216	0.183585	0.397408	0.680346	1	0.107991	0.24622	0.565875	0.829374	0.937365	0.015119	0.481641	0.611231	0.777538	0.99568	0.50108	0.34632	0.00432	0.25486	0.63067	0.829374	0.99568	0.416847
0.337349	0.319277	0.343373	0.229607	0.223565	0.193353	0.006024	0.21988	0.506024	0.759036	0.996988	0.027108	0.268072	0.478916	0.725904	0.990964	0.003012	0.256024	0.509036	0.762048	1	0.487952	0.129518	0.38253	0.048338	0.096677	0.006042	0.003012	0.289157	0.481928	0.728916	1	0.01506	0.195783	0.361446	0.626506	0.903614	0.048193	0.186747	0.593373	0.768072	0.972892	0.593373	0.332326	0.012048	0.292169	0.5	0.737952	0.993976	0.343373
0.285276	0.389571	0.325153	0.212308	0.227692	0.261538	0.006135	0.303681	0.469325	0.733129	1	0.01227	0.199387	0.5	0.773006	0.993865	0.003067	0.248466	0.52454	0.739264	0.996933	0.48773	0.282209	0.230061	0.101538	0.046154	0.003077	0.003067	0.242331	0.441718	0.714724	1	0.015337	0.184049	0.48773	0.613497	0.947853	0.116564	0.349693	0.699387	0.877301	0.993865	0.610429	0.393846	0.009202	0.288344	0.53681	0.791411	0.993865	0.420245
0.280519	0.431169	0.288312	0.257812	0.169271	0.263021	0.01039	0.293506	0.54026	0.797403	0.987013	0.005195	0.215584	0.425974	0.688312	0.994805	0.002597	0.246753	0.527273	0.753247	1	0.433766	0.194805	0.371429	0.059896	0.065104	0.007812	0.002597	0.184416	0.423377	0.662338	1	0.098701	0.335065	0.542857	0.714286	0.942857	0.067532	0.267532	0.488312	0.805195	0.987013	0.628571	0.380208	0.012987	0.254545	0.475325	0.719481	0.98961	0.462338
0.194611	0.365269	0.44012	0.153153	0.15015	0.381381	0.020958	0.260479	0.511976	0.787425	1	0.005988	0.269461	0.505988	0.715569	0.997006	0.002994	0.197605	0.467066	0.757485	0.991018	0.251497	0.083832	0.664671	0.021021	0.063063	0.009009	0.002994	0.257485	0.523952	0.805389	1	0.209581	0.242515	0.422156	0.949102	0.97006	0.020958	0.191617	0.479042	0.715569	0.916168	0.748503	0.192192	0.008982	0.236527	0.458084	0.721557	0.991018	0.353293
0.385417	0.291667	0.322917	0.273684	0.221053	0.147368	0.03125	0.1875	0.541667	0.75	1	0.020833	0.28125	0.416667	0.645833	0.989583	0.010417	0.21875	0.510417	0.739583	0.947917	0.354167	0.302083	0.34375	0.105263	0.042105	0	0.010417	0.260417	0.614583	0.78125	1	0.1875	0.302083	0.729167	0.833333	0.958333	0.03125	0.104167	0.427083	0.510417	0.604167	0.520833	0.378947	0.041667	0.291667	0.583333	0.791667	0.958333	0.3125
0.321244	0.331606	0.34715	0.197917	0.213542	0.25	0.010363	0.310881	0.528497	0.772021	1	0.015544	0.196891	0.481865	0.699482	0.927461	0.005181	0.186528	0.466321	0.751295	0.984456	0.42487	0.227979	0.34715	0.119792	0.067708	0.005208	0.005181	0.212435	0.481865	0.740933	1	0.025907	0.305699	0.42487	0.626943	0.896373	0.072539	0.243523	0.590674	0.834197	0.974093	0.601036	0.354167	0.015544	0.222798	0.523316	0.720207	0.963731	0.341969
0.433962	0.211321	0.354717	0.189394	0.310606	0.147727	0.011321	0.218868	0.498113	0.743396	0.996226	0.007547	0.241509	0.479245	0.777358	1	0.003774	0.260377	0.490566	0.713208	0.992453	0.388679	0.143396	0.467925	0.060606	0.090909	0.007576	0.003774	0.14717	0.437736	0.74717	1	0.011321	0.166038	0.316981	0.426415	0.90566	0.109434	0.377358	0.569811	0.766038	0.988679	0.558491	0.386364	0.015094	0.283019	0.516981	0.777358	0.992453	0.241509
0.32646	0.353952	0.319588	0.231034	0.244828	0.196552	0.006873	0.185567	0.508591	0.735395	0.996564	0.010309	0.292096	0.522337	0.776632	0.989691	0.003436	0.237113	0.450172	0.694158	1	0.463918	0.199313	0.33677	0.093103	0.072414	0.010345	0.003436	0.250859	0.594502	0.773196	1	0.020619	0.168385	0.463918	0.886598	0.993127	0.04811	0.243986	0.402062	0.584192	0.989691	0.611684	0.358621	0.020619	0.230241	0.463918	0.725086	0.993127	0.353952
0.210106	0.409574	0.380319	0.165333	0.133333	0.322667	0.007979	0.202128	0.486702	0.694149	0.994681	0.005319	0.263298	0.494681	0.736702	1	0.00266	0.226064	0.56117	0.773936	0.99734	0.382979	0.018617	0.598404	0.008	0.056	0.002667	0.00266	0.111702	0.430851	0.526596	1	0.042553	0.042553	0.220745	0.226064	0.231383	0.023936	0.292553	0.654255	0.837766	0.99734	0.656915	0.197333	0.010638	0.265957	0.587766	0.776596	0.992021	0.412234
0.215686	0.490196	0.294118	0.2	0.16	0.26	0.039216	0.078431	0.235294	0.509804	0.901961	0.019608	0.294118	0.568627	0.705882	0.980392	0.058824	0.137255	0.470588	0.784314	1	0.745098	0	0.254902	0	0.12	0	0.019608	0.215686	0.411765	0.647059	1	0	0	0	0	0	0.078431	0.490196	0.784314	0.843137	0.921569	0.411765	0.44	0.058824	0.27451	0.470588	0.686275	0.941176	0.705882
0.398496	0.353383	0.24812	0.287879	0.151515	0.143939	0.022556	0.18797	0.443609	0.669173	0.984962	0.015038	0.24812	0.421053	0.766917	1	0.007519	0.345865	0.548872	0.721805	0.992481	0.37594	0	0.62406	0	0.106061	0	0.007519	0.090226	0.18797	0.766917	1	0	0	0	0	0	0.195489	0.37594	0.548872	0.729323	0.984962	0.43609	0.30303	0.030075	0.263158	0.511278	0.676692	0.864662	0.390977
0.431818	0.291667	0.276515	0.201521	0.277567	0.155894	0.022727	0.299242	0.518939	0.753788	0.988636	0.007576	0.109848	0.424242	0.685606	0.996212	0.003788	0.238636	0.541667	0.757576	1	0.318182	0.07197	0.609848	0.038023	0.045627	0	0.003788	0.079545	0.625	0.795455	1	0.125	0.708333	0.727273	0.784091	0.825758	0.140152	0.287879	0.450758	0.602273	0.981061	0.348485	0.456274	0.018939	0.261364	0.583333	0.776515	0.973485	0.340909
0.367769	0.338843	0.293388	0.215768	0.211618	0.240664	0.008264	0.165289	0.429752	0.793388	1	0.045455	0.289256	0.483471	0.698347	0.987603	0.004132	0.268595	0.557851	0.743802	0.995868	0.413223	0.045455	0.541322	0.012448	0.103734	0.004149	0.004132	0.301653	0.409091	0.764463	1	0.549587	0.553719	0.566116	0.731405	0.743802	0.024793	0.152893	0.508264	0.747934	0.987603	0.454545	0.373444	0.024793	0.301653	0.557851	0.690083	0.987603	0.359504
0.29443	0.3687	0.33687	0.194149	0.226064	0.242021	0.005305	0.286472	0.541114	0.809019	0.98939	0.01061	0.228117	0.458886	0.710875	0.984085	0.002653	0.236074	0.477454	0.782493	1	0.440318	0.222812	0.33687	0.095745	0.074468	0.010638	0.002653	0.177719	0.371353	0.70557	1	0.119363	0.220159	0.400531	0.700265	0.997347	0.013263	0.437666	0.604775	0.835544	0.96817	0.633952	0.361702	0.007958	0.27321	0.469496	0.702918	0.994695	0.395225
0.143939	0.340909	0.515152	0.10687	0.114504	0.366412	0.022727	0.098485	0.636364	0.924242	1	0.015152	0.227273	0.477273	0.75	0.984848	0.007576	0.242424	0.454545	0.704545	0.94697	0.189394	0	0.810606	0	0.061069	0	0.007576	0.272727	0.424242	0.94697	1	0	0	0	0	0	0.015152	0.204545	0.492424	0.704545	0.909091	0.689394	0.305344	0.030303	0.219697	0.44697	0.666667	0.893939	0.310606
0.298137	0.42236	0.279503	0.19375	0.19375	0.20625	0.055901	0.223602	0.440994	0.850932	0.993789	0.012422	0.248447	0.484472	0.68323	0.975155	0.006211	0.267081	0.509317	0.720497	1	0.478261	0.161491	0.360248	0.0875	0.075	0	0.006211	0.242236	0.465839	0.652174	1	0.223602	0.285714	0.391304	0.490683	0.608696	0.055901	0.149068	0.73913	0.881988	0.981366	0.459627	0.425	0.074534	0.291925	0.509317	0.68323	0.968944	0.42236
0.365079	0.365079	0.269841	0.213636	0.268182	0.152273	0.027211	0.353741	0.54195	0.752834	0.986395	0.011338	0.145125	0.328798	0.68254	1	0.002268	0.276644	0.521542	0.811791	0.995465	0.292517	0.092971	0.614512	0.036364	0.031818	0	0.002268	0.079365	0.156463	0.365079	1	0.004535	0.387755	0.938776	0.965986	0.995465	0.204082	0.405896	0.598639	0.755102	0.909297	0.485261	0.45	0.004535	0.151927	0.385488	0.666667	0.995465	0.394558
0.355705	0.355705	0.288591	0.256757	0.236486	0.189189	0.013423	0.302013	0.516779	0.738255	1	0.026846	0.268456	0.503356	0.751678	0.966443	0.006711	0.127517	0.416107	0.711409	0.993289	0.248322	0	0.751678	0	0.081081	0	0.006711	0.47651	0.557047	0.61745	1	0	0	0	0	0	0.013423	0.194631	0.42953	0.751678	0.986577	0.456376	0.418919	0.020134	0.127517	0.315436	0.644295	0.993289	0.402685
0.312436	0.377184	0.31038	0.235597	0.188272	0.227366	0.006166	0.276465	0.52518	0.773895	0.995889	0.002055	0.22816	0.469681	0.714286	0.997945	0.001028	0.254882	0.504625	0.747174	1	0.378212	0.14594	0.475848	0.05144	0.078189	0.004115	0.001028	0.168551	0.32888	0.707091	1	0.046249	0.107914	0.198356	0.354573	0.893114	0.004111	0.483042	0.63001	0.799589	0.997945	0.554985	0.378601	0.004111	0.236382	0.464543	0.713258	0.991778	0.377184
0.267606	0.376761	0.355634	0.159011	0.215548	0.272085	0.021127	0.21831	0.475352	0.799296	0.996479	0.007042	0.25	0.419014	0.68662	0.989437	0.003521	0.264085	0.552817	0.795775	1	0.43662	0.147887	0.415493	0.088339	0.088339	0.017668	0.003521	0.278169	0.517606	0.690141	1	0.059859	0.161972	0.401408	0.524648	0.989437	0.024648	0.309859	0.602113	0.799296	0.978873	0.690141	0.360424	0.017606	0.260563	0.478873	0.721831	0.992958	0.359155
0.268519	0.407407	0.324074	0.219814	0.170279	0.318885	0.009259	0.188272	0.432099	0.657407	0.987654	0.021605	0.314815	0.555556	0.799383	0.993827	0.003086	0.243827	0.472222	0.75	1	0.41358	0.141975	0.444444	0.052632	0.083591	0.01548	0.003086	0.277778	0.503086	0.799383	1	0.021605	0.188272	0.407407	0.848765	0.910494	0.012346	0.253086	0.484568	0.657407	0.981481	0.645062	0.315789	0.021605	0.302469	0.564815	0.783951	0.996914	0.391975
0.219081	0.473498	0.30742	0.20922	0.138298	0.265957	0.088339	0.342756	0.618375	0.823322	0.985866	0.010601	0.233216	0.469965	0.706714	0.989399	0.003534	0.187279	0.44523	0.738516	1	0.636042	0.243816	0.120141	0.113475	0.035461	0.007092	0.003534	0.349823	0.575972	0.784452	1	0.081272	0.328622	0.526502	0.724382	0.971731	0.007067	0.031802	0.074205	0.141343	0.204947	0.568905	0.404255	0.014134	0.243816	0.44523	0.720848	0.989399	0.501767
0.312392	0.385542	0.302065	0.236865	0.203273	0.243755	0.002582	0.240103	0.497418	0.746988	1	0.001721	0.254733	0.489673	0.754733	0.998279	0.000861	0.246988	0.502582	0.740103	0.999139	0.39759	0.197935	0.404475	0.087855	0.087855	0.001723	0.000861	0.263339	0.512048	0.748709	1	0.007745	0.248709	0.563683	0.747849	0.993115	0.021515	0.20654	0.459552	0.703098	0.999139	0.628227	0.37037	0.006024	0.245267	0.500861	0.748709	0.998279	0.416523
0.053333	0.386667	0.56	0.040541	0.054054	0.5	0.093333	0.093333	0.173333	0.226667	1	0.066667	0.24	0.386667	0.706667	0.973333	0.013333	0.293333	0.56	0.733333	0.986667	0.32	0.093333	0.586667	0.054054	0.027027	0	0.013333	0.093333	0.253333	0.333333	1	0.053333	0.053333	0.173333	0.2	0.226667	0.373333	0.506667	0.653333	0.8	0.946667	0.48	0.351351	0.053333	0.293333	0.453333	0.826667	0.946667	0.373333
0.300412	0.37037	0.329218	0.165289	0.231405	0.190083	0.032922	0.222222	0.44856	0.679012	0.975309	0.00823	0.242798	0.485597	0.736626	0.987654	0.004115	0.279835	0.547325	0.806584	1	0.378601	0.218107	0.403292	0.07438	0.049587	0	0.004115	0.382716	0.547325	0.740741	1	0.148148	0.218107	0.522634	0.617284	0.995885	0.012346	0.106996	0.353909	0.757202	0.860082	0.493827	0.471074	0.020576	0.230453	0.530864	0.765432	0.983539	0.407407
0.236641	0.507634	0.255725	0.237548	0.10728	0.233716	0.022901	0.232824	0.541985	0.721374	0.996183	0.007634	0.229008	0.484733	0.759542	1	0.003817	0.251908	0.450382	0.748092	0.977099	0.553435	0.171756	0.274809	0.068966	0.068966	0.007663	0.003817	0.324427	0.507634	0.824427	1	0.045802	0.236641	0.328244	0.759542	0.980916	0.022901	0.10687	0.561069	0.645038	0.790076	0.618321	0.35249	0.030534	0.244275	0.454198	0.709924	0.977099	0.545802
0.320346	0.359307	0.320346	0.234783	0.217391	0.269565	0.008658	0.242424	0.528139	0.766234	0.987013	0.012987	0.233766	0.480519	0.727273	0.995671	0.004329	0.238095	0.489177	0.735931	1	0.437229	0.147186	0.415584	0.056522	0.082609	0.004348	0.004329	0.320346	0.536797	0.805195	1	0.012987	0.116883	0.25974	0.575758	0.844156	0.056277	0.225108	0.502165	0.757576	0.991342	0.593074	0.356522	0.012987	0.212121	0.502165	0.692641	0.982684	0.398268
0.167816	0.349425	0.482759	0.110599	0.14977	0.359447	0.036782	0.23908	0.404598	0.712644	1	0.004598	0.22069	0.466667	0.758621	0.988506	0.002299	0.25977	0.537931	0.74023	0.997701	0.232184	0.066667	0.701149	0.029954	0.089862	0.002304	0.002299	0.264368	0.365517	0.609195	1	0.073563	0.324138	0.595402	0.972414	0.997701	0.006897	0.241379	0.526437	0.767816	0.956322	0.813793	0.170507	0.009195	0.275862	0.533333	0.767816	0.997701	0.310345
0.306397	0.449495	0.244108	0.261383	0.126476	0.187184	0.053872	0.316498	0.653199	0.843434	0.993266	0.003367	0.240741	0.486532	0.750842	0.994949	0.001684	0.16835	0.367003	0.542088	1	0.641414	0.131313	0.227273	0.048904	0.062395	0.001686	0.001684	0.329966	0.575758	0.787879	1	0.058923	0.097643	0.239057	0.304714	0.734007	0.005051	0.171717	0.43266	0.675084	0.988215	0.427609	0.357504	0.008418	0.170034	0.390572	0.580808	0.984848	0.486532
0.242718	0.495146	0.262136	0.215686	0.156863	0.323529	0.029126	0.194175	0.504854	0.786408	0.961165	0.019417	0.262136	0.446602	0.68932	1	0.009709	0.145631	0.495146	0.737864	0.990291	0.291262	0.038835	0.669903	0.029412	0.088235	0.009804	0.009709	0.067961	0.359223	0.640777	1	0.23301	0.23301	0.38835	0.398058	0.407767	0.087379	0.291262	0.572816	0.796117	0.970874	0.563107	0.529412	0.048544	0.242718	0.504854	0.747573	0.990291	0.485437
0.342193	0.388704	0.269103	0.24	0.153333	0.236667	0.009967	0.259136	0.41196	0.700997	0.996678	0.006645	0.209302	0.488372	0.724252	1	0.003322	0.249169	0.584718	0.79402	0.993355	0.574751	0.129568	0.295681	0.08	0.046667	0.013333	0.003322	0.209302	0.548173	0.774086	1	0.043189	0.212625	0.671096	0.79402	0.9701	0.059801	0.245847	0.318937	0.392027	0.900332	0.388704	0.32	0.026578	0.219269	0.584718	0.790698	0.9701	0.438538
0.321918	0.321918	0.356164	0.255172	0.241379	0.289655	0.013699	0.205479	0.458904	0.753425	0.993151	0.027397	0.30137	0.452055	0.726027	1	0.006849	0.232877	0.513699	0.760274	0.979452	0.363014	0.246575	0.390411	0.068966	0.110345	0	0.006849	0.294521	0.458904	0.719178	1	0.034247	0.479452	0.678082	0.787671	0.986301	0.082192	0.178082	0.342466	0.59589	0.90411	0.513699	0.468966	0.041096	0.308219	0.506849	0.691781	0.986301	0.30137
0.202247	0.494382	0.303371	0.272727	0.113636	0.193182	0.033708	0.314607	0.573034	0.730337	0.921348	0.067416	0.404494	0.640449	0.808989	1	0.011236	0.11236	0.202247	0.426966	0.932584	0.674157	0	0.325843	0	0.068182	0	0.011236	0.337079	0.505618	0.674157	1	0	0	0	0	0	0.044944	0.11236	0.191011	0.764045	0.932584	0.483146	0.295455	0.044944	0.157303	0.337079	0.516854	0.932584	0.573034
0.291667	0.375	0.333333	0.188811	0.20979	0.244755	0.013889	0.1875	0.493056	0.666667	1	0.027778	0.298611	0.472222	0.791667	0.965278	0.006944	0.243056	0.520833	0.770833	0.993056	0.368056	0.222222	0.409722	0.076923	0.062937	0.006993	0.006944	0.298611	0.388889	0.75	1	0.027778	0.243056	0.604167	0.784722	0.993056	0.104167	0.194444	0.486111	0.694444	0.930556	0.5625	0.447552	0.013889	0.25	0.493056	0.763889	0.993056	0.368056
0.340764	0.314225	0.345011	0.221041	0.247609	0.233794	0.002123	0.27707	0.511677	0.783439	1	0.004246	0.228238	0.473461	0.703822	0.995754	0.001062	0.242038	0.492569	0.745223	0.998938	0.402335	0.14862	0.449045	0.065887	0.074389	0.002125	0.001062	0.245223	0.447983	0.640127	1	0.028662	0.22293	0.306794	0.541401	0.998938	0.005308	0.289809	0.669851	0.804671	0.964968	0.597665	0.378321	0.003185	0.23673	0.5	0.715499	0.998938	0.318471
0.372951	0.303279	0.32377	0.222222	0.230453	0.209877	0.016393	0.27459	0.54918	0.790984	0.995902	0.036885	0.282787	0.504098	0.729508	1	0.004098	0.180328	0.438525	0.70082	0.963115	0.422131	0.209016	0.368852	0.082305	0.074074	0.016461	0.004098	0.409836	0.590164	0.868852	1	0.012295	0.143443	0.614754	0.782787	0.918033	0.045082	0.20082	0.340164	0.483607	0.811475	0.438525	0.403292	0.012295	0.163934	0.438525	0.696721	0.971311	0.344262
0.302292	0.353868	0.34384	0.219512	0.193687	0.248207	0.002865	0.253582	0.507163	0.769341	0.991404	0.004298	0.222063	0.458453	0.696275	0.998567	0.001433	0.265043	0.555874	0.772206	1	0.474212	0.163324	0.362464	0.071736	0.043042	0.002869	0.001433	0.243553	0.405444	0.581662	1	0.146132	0.25788	0.442693	0.583095	0.998567	0.004298	0.209169	0.710602	0.848138	0.974212	0.568768	0.390244	0.008596	0.249284	0.489971	0.694842	0.997135	0.372493
0.246479	0.429577	0.323944	0.226148	0.144876	0.325088	0.014085	0.316901	0.559859	0.746479	1	0.007042	0.235915	0.464789	0.732394	0.992958	0.003521	0.232394	0.478873	0.757042	0.996479	0.450704	0.246479	0.302817	0.091873	0.09894	0.007067	0.003521	0.207746	0.401408	0.683099	1	0.080986	0.151408	0.369718	0.834507	0.989437	0.03169	0.443662	0.573944	0.714789	0.887324	0.552817	0.381625	0.028169	0.264085	0.538732	0.764085	0.985915	0.46831
0.372093	0.363636	0.264271	0.271186	0.186441	0.197034	0.006342	0.257928	0.46723	0.691332	0.995772	0.019027	0.300211	0.54334	0.77167	1	0.002114	0.160677	0.484144	0.761099	0.991543	0.289641	0.164905	0.545455	0.069915	0.052966	0.006356	0.002114	0.274841	0.604651	0.809725	1	0.095137	0.710359	0.828753	0.890063	0.961945	0.008457	0.230444	0.397463	0.564482	0.991543	0.386892	0.436441	0.012685	0.241015	0.551797	0.803383	0.991543	0.363636
0.251282	0.435897	0.312821	0.200514	0.18509	0.275064	0.012821	0.220513	0.446154	0.658974	0.987179	0.005128	0.271795	0.510256	0.792308	1	0.002564	0.246154	0.525641	0.751282	0.997436	0.494872	0.338462	0.166667	0.100257	0.028278	0.002571	0.002564	0.233333	0.5	0.707692	1	0.012821	0.405128	0.65641	0.864103	0.994872	0.007692	0.058974	0.1	0.35641	0.687179	0.651282	0.323907	0.007692	0.330769	0.582051	0.807692	0.994872	0.448718
0.237778	0.317778	0.444444	0.122494	0.218263	0.282851	0.008889	0.244444	0.524444	0.728889	1	0.004444	0.235556	0.515556	0.795556	0.997778	0.002222	0.251111	0.462222	0.735556	0.995556	0.237778	0.033333	0.728889	0.026726	0.062361	0	0.002222	0.291111	0.537778	0.873333	1	0.073333	0.077778	0.097778	0.577778	0.991111	0.004444	0.251111	0.457778	0.733333	0.96	0.726667	0.262806	0.004444	0.237778	0.453333	0.737778	0.995556	0.315556
0.302691	0.441704	0.255605	0.244944	0.139326	0.262921	0.008969	0.262332	0.511211	0.73991	1	0.004484	0.237668	0.479821	0.701794	0.993274	0.002242	0.199552	0.513453	0.782511	0.995516	0.719731	0.024664	0.255605	0.026966	0.053933	0	0.002242	0.273543	0.511211	0.695067	1	0.100897	0.282511	0.369955	0.495516	0.605381	0.134529	0.221973	0.459641	0.807175	0.890135	0.430493	0.373034	0.013453	0.221973	0.367713	0.798206	0.984305	0.457399
0.243421	0.421053	0.335526	0.258278	0.165563	0.291391	0.013158	0.335526	0.513158	0.710526	0.993421	0.019737	0.236842	0.519737	0.743421	1	0.006579	0.131579	0.414474	0.763158	0.986842	0.427632	0.184211	0.388158	0.05298	0.092715	0	0.006579	0.460526	0.638158	0.848684	1	0.559211	0.598684	0.697368	0.822368	0.888158	0.013158	0.111842	0.210526	0.309211	0.940789	0.427632	0.291391	0.052632	0.190789	0.302632	0.690789	0.986842	0.440789
0.314453	0.349609	0.335938	0.217221	0.197652	0.221135	0.011719	0.212891	0.486328	0.728516	0.988281	0.003906	0.232422	0.46875	0.740234	0.998047	0.001953	0.289062	0.529297	0.767578	1	0.539062	0.152344	0.308594	0.060665	0.076321	0.013699	0.001953	0.193359	0.511719	0.773438	1	0.046875	0.279297	0.53125	0.695312	0.984375	0.011719	0.251953	0.470703	0.714844	0.978516	0.503906	0.360078	0.009766	0.332031	0.509766	0.720703	0.990234	0.386719
0.414105	0.370705	0.21519	0.378623	0.181159	0.168478	0.003617	0.262206	0.511754	0.734177	1	0.014467	0.222423	0.444846	0.681736	0.994575	0.001808	0.242315	0.594937	0.866184	0.998192	0.840868	0.068716	0.090416	0.025362	0.021739	0	0.001808	0.227848	0.437613	0.647378	1	0.074141	0.815552	0.904159	0.951175	0.972875	0.009042	0.831826	0.882459	0.929476	0.998192	0.117541	0.115942	0.005425	0.842676	0.880651	0.929476	0.992767	0.433996
0.320442	0.383425	0.296133	0.224558	0.200221	0.193584	0.00221	0.250829	0.500552	0.735912	0.99558	0.003315	0.236464	0.459669	0.729282	0.99337	0.001105	0.261878	0.516022	0.79337	1	0.575691	0.251934	0.172376	0.091814	0.056416	0.007743	0.001105	0.176796	0.429834	0.686188	1	0.106077	0.329282	0.528177	0.79558	0.998895	0.00663	0.320442	0.660773	0.899448	0.99558	0.563536	0.35177	0.007735	0.278453	0.503867	0.758011	0.99779	0.40442
0.189655	0.62069	0.189655	0.315789	0.035088	0.263158	0.310345	0.344828	0.534483	0.827586	0.965517	0.034483	0.241379	0.482759	0.758621	1	0.017241	0.051724	0.189655	0.672414	0.982759	0.862069	0.137931	0	0.070175	0	0	0.017241	0.275862	0.5	0.775862	1	0.051724	0.068966	0.103448	0.724138	0.758621	0	0	0	0	0	0.362069	0.245614	0.051724	0.12069	0.413793	0.706897	0.810345	0.568966
0.243956	0.345055	0.410989	0.156388	0.147577	0.314978	0.013187	0.178022	0.567033	0.742857	0.978022	0.004396	0.281319	0.487912	0.70989	0.997802	0.002198	0.250549	0.459341	0.795604	1	0.454945	0.015385	0.52967	0.013216	0.048458	0	0.002198	0.184615	0.589011	0.703297	1	0.008791	0.008791	0.410989	0.457143	0.461538	0.105495	0.246154	0.474725	0.830769	0.993407	0.523077	0.185022	0.004396	0.23956	0.393407	0.832967	0.995604	0.336264
0.384321	0.41109	0.204589	0.273946	0.176245	0.14751	0.007648	0.254302	0.491396	0.674952	1	0.003824	0.265774	0.476099	0.801147	0.978967	0.001912	0.17782	0.562141	0.724665	0.994264	0.600382	0.01912	0.380497	0.01341	0.070881	0.001916	0.001912	0.25239	0.405354	0.694073	1	0.133843	0.141491	0.826004	0.829828	0.843212	0.036329	0.244742	0.629063	0.749522	0.996176	0.399618	0.371648	0.005736	0.208413	0.541109	0.799235	0.992352	0.443595
0.337017	0.348066	0.314917	0.211111	0.233333	0.177778	0.01105	0.248619	0.491713	0.745856	0.994475	0.027624	0.21547	0.458564	0.651934	0.977901	0.005525	0.287293	0.546961	0.79558	1	0.596685	0.237569	0.165746	0.1	0.033333	0.011111	0.005525	0.309392	0.530387	0.745856	1	0.281768	0.41989	0.585635	0.845304	0.994475	0.038674	0.071823	0.116022	0.21547	0.392265	0.491713	0.4	0.049724	0.292818	0.541436	0.79558	0.98895	0.370166
0.35124	0.376033	0.272727	0.267081	0.20911	0.213251	0.006198	0.260331	0.485537	0.75	0.997934	0.004132	0.225207	0.487603	0.71281	0.979339	0.002066	0.264463	0.520661	0.783058	1	0.597107	0.183884	0.219008	0.070393	0.05383	0.012422	0.002066	0.225207	0.518595	0.737603	1	0.07438	0.433884	0.609504	0.791322	0.997934	0.010331	0.18595	0.336777	0.747934	0.981405	0.634298	0.289855	0.014463	0.258264	0.504132	0.745868	0.995868	0.440083
0.322957	0.373541	0.303502	0.214425	0.20078	0.253411	0.003891	0.276265	0.540856	0.768482	1	0.005837	0.233463	0.457198	0.733463	0.992218	0.001946	0.237354	0.51751	0.745136	0.998054	0.484436	0.214008	0.301556	0.087719	0.064327	0.013645	0.001946	0.231518	0.490272	0.752918	1	0.013619	0.365759	0.754864	0.879377	0.998054	0.019455	0.250973	0.418288	0.587549	0.770428	0.618677	0.366472	0.005837	0.241245	0.457198	0.70428	0.998054	0.38716
0.288678	0.401897	0.309425	0.209964	0.212337	0.247331	0.001186	0.264375	0.534084	0.78364	0.998814	0.004149	0.250741	0.503853	0.716064	1	0.000593	0.229401	0.466509	0.751037	0.999407	0.45406	0.259632	0.286307	0.071767	0.061091	0.002966	0.000593	0.289864	0.573207	0.774748	1	0.01719	0.155898	0.53112	0.812092	0.996443	0.001778	0.238886	0.339656	0.596325	0.998222	0.517487	0.385528	0.001778	0.255483	0.463545	0.742739	0.999407	0.395376
0.276812	0.428986	0.294203	0.208999	0.174165	0.275762	0.005797	0.214493	0.417391	0.63913	0.992754	0.002899	0.272464	0.584058	0.791304	0.998551	0.001449	0.253623	0.489855	0.72029	1	0.33913	0.071014	0.589855	0.026125	0.063861	0	0.001449	0.573913	0.681159	0.807246	1	0.011594	0.608696	0.857971	0.955072	0.995652	0.024638	0.178261	0.362319	0.521739	0.924638	0.673913	0.351234	0.004348	0.289855	0.563768	0.776812	0.997101	0.444928
0.275862	0.421456	0.302682	0.226923	0.180769	0.215385	0.007663	0.218391	0.555556	0.785441	0.992337	0.015326	0.233716	0.455939	0.67433	1	0.003831	0.272031	0.509579	0.758621	0.996169	0.356322	0.157088	0.48659	0.080769	0.096154	0.003846	0.003831	0.245211	0.444444	0.724138	1	0.195402	0.329502	0.517241	0.708812	0.915709	0.011494	0.157088	0.478927	0.758621	0.988506	0.559387	0.407692	0.019157	0.321839	0.505747	0.735632	0.984674	0.440613
0.218978	0.50365	0.277372	0.205882	0.147059	0.272059	0.145985	0.277372	0.518248	0.678832	0.941606	0.014599	0.262774	0.547445	0.759124	1	0.007299	0.124088	0.386861	0.664234	0.985401	0.452555	0.459854	0.087591	0.176471	0.029412	0.014706	0.007299	0.240876	0.459854	0.693431	1	0.043796	0.306569	0.554745	0.810219	0.985401	0.029197	0.058394	0.080292	0.10219	0.79562	0.620438	0.323529	0.021898	0.284672	0.489051	0.759124	0.985401	0.467153
0.34004	0.377465	0.282495	0.245169	0.191626	0.229066	0.002817	0.249497	0.501811	0.752515	1	0.000805	0.260765	0.50664	0.724346	0.99839	0.000402	0.241851	0.476861	0.767404	0.999598	0.62495	0.147284	0.227767	0.061997	0.049919	0.004026	0.000402	0.321127	0.532797	0.737223	1	0.020121	0.315895	0.571831	0.768612	0.979477	0.002012	0.172636	0.296579	0.744064	0.999195	0.428974	0.357488	0.00161	0.255936	0.519115	0.782294	0.994366	0.398793
0.292614	0.411932	0.295455	0.213675	0.179487	0.242165	0.005682	0.215909	0.46875	0.755682	0.985795	0.017045	0.298295	0.488636	0.713068	0.994318	0.002841	0.230114	0.505682	0.775568	1	0.321023	0.136364	0.542614	0.05698	0.08547	0	0.002841	0.255682	0.411932	0.755682	1	0.017045	0.113636	0.269886	0.428977	0.946023	0.059659	0.295455	0.579545	0.775568	0.988636	0.667614	0.336182	0.017045	0.286932	0.482955	0.710227	0.991477	0.397727
0.31875	0.4	0.28125	0.245283	0.157233	0.226415	0.0125	0.1625	0.3625	0.6125	0.99375	0.04375	0.33125	0.55625	0.8	1	0.00625	0.2125	0.475	0.76875	0.95	0.40625	0.1375	0.45625	0.050314	0.075472	0	0.00625	0.2625	0.5	0.76875	1	0.01875	0.04375	0.45	0.48125	0.675	0.0875	0.325	0.55	0.775	0.95	0.53125	0.377358	0.01875	0.25625	0.55625	0.8125	0.98125	0.4125
0.277978	0.379061	0.34296	0.199275	0.213768	0.246377	0.021661	0.227437	0.480144	0.693141	0.974729	0.00722	0.259928	0.537906	0.761733	1	0.00361	0.241877	0.487365	0.768953	0.99278	0.429603	0.202166	0.368231	0.07971	0.094203	0.007246	0.00361	0.176895	0.425993	0.68231	1	0.086643	0.144404	0.288809	0.779783	0.99278	0.227437	0.418773	0.577617	0.740072	0.949458	0.570397	0.376812	0.01444	0.263538	0.516245	0.747292	0.99278	0.382671
0.209262	0.396226	0.394511	0.170103	0.152921	0.321306	0.005146	0.226415	0.418525	0.785592	0.994854	0.003431	0.246998	0.480274	0.723842	0.998285	0.001715	0.26072	0.545455	0.756432	1	0.439108	0.048027	0.512864	0.030928	0.061856	0	0.001715	0.207547	0.35506	0.571184	1	0.09777	0.284734	0.560892	0.708405	0.951973	0.005146	0.418525	0.620926	0.797599	0.977702	0.590051	0.305842	0.006861	0.255575	0.562607	0.754717	0.979417	0.409949
0.168317	0.386139	0.445545	0.119403	0.129353	0.39801	0.019802	0.163366	0.415842	0.60396	0.970297	0.009901	0.252475	0.509901	0.767327	0.990099	0.00495	0.267327	0.529703	0.757426	1	0.108911	0.009901	0.881188	0.00995	0.069652	0	0.00495	0.183168	0.415842	0.633663	1	0.841584	0.841584	0.841584	0.841584	0.846535	0.024752	0.247525	0.514851	0.742574	0.99505	0.737624	0.248756	0.024752	0.257426	0.5	0.717822	0.980198	0.316832
0.38255	0.275168	0.342282	0.216216	0.256757	0.189189	0.060403	0.228188	0.530201	0.751678	0.993289	0.013423	0.275168	0.436242	0.637584	0.973154	0.006711	0.208054	0.47651	0.711409	1	0.449664	0.228188	0.322148	0.054054	0.094595	0	0.006711	0.241611	0.463087	0.66443	1	0.020134	0.261745	0.38255	0.57047	0.630872	0.067114	0.187919	0.731544	0.90604	0.986577	0.496644	0.378378	0.020134	0.241611	0.42953	0.724832	0.979866	0.261745
0.202797	0.377622	0.41958	0.112676	0.140845	0.338028	0.020979	0.090909	0.461538	0.881119	0.986014	0.013986	0.251748	0.503497	0.748252	0.951049	0.006993	0.265734	0.496503	0.699301	1	0.272727	0.076923	0.65035	0.028169	0.028169	0	0.006993	0.335664	0.832168	0.902098	1	0.363636	0.370629	0.391608	0.916084	0.937063	0.055944	0.20979	0.482517	0.643357	0.811189	0.685315	0.267606	0.062937	0.244755	0.503497	0.678322	0.951049	0.398601
0.352129	0.321059	0.326812	0.207373	0.246544	0.214286	0.003452	0.203682	0.445339	0.719217	0.997699	0.002301	0.278481	0.535098	0.765247	0.996548	0.001151	0.254315	0.493671	0.761795	1	0.528193	0.163406	0.3084	0.065668	0.074885	0.008065	0.001151	0.226697	0.532796	0.776755	1	0.043728	0.225547	0.7687	0.927503	0.998849	0.005754	0.250863	0.376295	0.567319	0.965478	0.516686	0.33871	0.006904	0.293441	0.510932	0.783659	0.998849	0.326812
0.355641	0.372849	0.271511	0.268199	0.187739	0.16092	0.011472	0.212237	0.472275	0.734226	0.994264	0.003824	0.294455	0.554493	0.785851	0.996176	0.001912	0.231358	0.451243	0.688337	1	0.66348	0.225621	0.110899	0.126437	0.034483	0	0.001912	0.25239	0.523901	0.764818	1	0.017208	0.1587	0.40153	0.609943	0.975143	0.082218	0.321224	0.531549	0.789675	0.904398	0.376673	0.283525	0.01912	0.263862	0.487572	0.749522	0.978967	0.407266
0.405797	0.207729	0.386473	0.218447	0.223301	0.150485	0.009662	0.415459	0.608696	0.782609	1	0.024155	0.140097	0.449275	0.666667	0.995169	0.004831	0.198068	0.328502	0.700483	0.966184	0.082126	0	0.917874	0	0.038835	0	0.004831	0.135266	0.169082	0.975845	1	0	0	0	0	0	0.019324	0.270531	0.502415	0.729469	0.971014	0.391304	0.407767	0.014493	0.135266	0.405797	0.700483	0.966184	0.222222
0.403654	0.352159	0.244186	0.206323	0.224626	0.163062	0.004983	0.197674	0.398671	0.767442	1	0.003322	0.430233	0.612957	0.73588	0.995017	0.001661	0.187708	0.410299	0.737542	0.998339	0.556478	0.023256	0.420266	0.013311	0.049917	0.006656	0.001661	0.538206	0.677741	0.817276	1	0.006645	0.009967	0.121262	0.377076	0.921927	0.011628	0.136213	0.267442	0.406977	0.981728	0.26412	0.326123	0.008306	0.151163	0.340532	0.800664	0.980066	0.360465
0.127059	0.381176	0.491765	0.09434	0.115566	0.353774	0.084706	0.209412	0.487059	0.778824	1	0.004706	0.254118	0.432941	0.665882	0.988235	0.002353	0.24	0.529412	0.774118	0.997647	0.176471	0.018824	0.804706	0.002358	0.082547	0.007075	0.002353	0.256471	0.472941	0.731765	1	0.835294	0.842353	0.847059	0.851765	0.856471	0.004706	0.237647	0.498824	0.734118	0.995294	0.814118	0.183962	0.007059	0.256471	0.515294	0.764706	0.990588	0.392941
0.258993	0.442446	0.298561	0.220217	0.184116	0.241877	0.014388	0.208633	0.377698	0.726619	0.992806	0.007194	0.28777	0.546763	0.748201	0.996403	0.003597	0.226619	0.510791	0.76259	1	0.388489	0.169065	0.442446	0.064982	0.075812	0	0.003597	0.097122	0.392086	0.661871	0.989209	0.136691	0.241007	0.417266	0.766187	0.978417	0.169065	0.359712	0.564748	0.748201	1	0.611511	0.33935	0.007194	0.291367	0.571942	0.773381	0.992806	0.471223
0.339901	0.32266	0.337438	0.214815	0.25679	0.234568	0.007389	0.20936	0.458128	0.743842	1	0.009852	0.325123	0.544335	0.751232	0.992611	0.002463	0.231527	0.480296	0.731527	0.995074	0.359606	0.14532	0.495074	0.051852	0.081481	0.002469	0.002463	0.253695	0.58867	0.852217	1	0.068966	0.256158	0.775862	0.903941	0.982759	0.012315	0.20197	0.403941	0.600985	0.963054	0.640394	0.355556	0.004926	0.275862	0.502463	0.714286	0.982759	0.330049
0.287183	0.390679	0.322138	0.242798	0.164609	0.233196	0.004798	0.228924	0.457162	0.779301	0.996573	0.002056	0.270048	0.501714	0.771076	0.999315	0.000685	0.252228	0.531186	0.711446	1	0.553804	0.17889	0.267306	0.072702	0.042524	0.002743	0.000685	0.263194	0.52159	0.82865	1	0.032214	0.156271	0.26525	0.542152	0.998629	0.004112	0.390679	0.587389	0.697053	0.939685	0.595613	0.323731	0.003427	0.244003	0.516107	0.733379	0.997944	0.403701
0.397906	0.314136	0.287958	0.242105	0.252632	0.205263	0.010471	0.256545	0.502618	0.706806	0.989529	0.036649	0.267016	0.460733	0.748691	1	0.005236	0.198953	0.47644	0.753927	0.968586	0.434555	0.267016	0.298429	0.089474	0.036842	0.005263	0.005236	0.324607	0.596859	0.743455	1	0.010471	0.21466	0.350785	0.858639	0.973822	0.073298	0.141361	0.429319	0.502618	0.811518	0.413613	0.442105	0.015707	0.230366	0.471204	0.816754	0.979058	0.293194
0.299685	0.378549	0.321767	0.202212	0.202212	0.271722	0.006309	0.260252	0.457413	0.689274	0.98265	0.003155	0.264984	0.583596	0.790221	0.998423	0.001577	0.236593	0.440063	0.72082	1	0.474763	0.246057	0.27918	0.104265	0.050553	0	0.001577	0.361199	0.599369	0.793375	1	0.009464	0.544164	0.692429	0.847003	0.998423	0.044164	0.190852	0.276025	0.369085	0.463722	0.572555	0.382306	0.012618	0.276025	0.548896	0.764984	0.996845	0.402208
0.2827	0.400844	0.316456	0.211864	0.186441	0.241525	0.008439	0.177215	0.468354	0.742616	0.991561	0.012658	0.265823	0.56962	0.78481	1	0.004219	0.223629	0.434599	0.675105	0.987342	0.396624	0.164557	0.438819	0.084746	0.101695	0	0.004219	0.21519	0.510549	0.772152	1	0.063291	0.168776	0.396624	0.675105	0.898734	0.101266	0.303797	0.552743	0.721519	0.991561	0.586498	0.330508	0.063291	0.295359	0.493671	0.755274	0.987342	0.43038
0.331541	0.304659	0.363799	0.199282	0.260323	0.184919	0.003584	0.252688	0.521505	0.774194	0.998208	0.026882	0.243728	0.473118	0.741935	0.982079	0.001792	0.236559	0.503584	0.729391	1	0.483871	0.154122	0.362007	0.077199	0.070018	0.001795	0.001792	0.232975	0.521505	0.732975	1	0.107527	0.37276	0.740143	0.817204	0.96595	0.005376	0.175627	0.453405	0.688172	0.994624	0.587814	0.355476	0.012545	0.301075	0.53405	0.741935	0.992832	0.310036
0.391304	0.362319	0.246377	0.25	0.264706	0.161765	0.043478	0.289855	0.550725	0.724638	1	0.028986	0.188406	0.318841	0.594203	0.985507	0.014493	0.26087	0.507246	0.753623	0.956522	0.478261	0.318841	0.202899	0.117647	0.058824	0	0.014493	0.217391	0.347826	0.57971	1	0.043478	0.101449	0.681159	0.753623	0.971014	0.405797	0.434783	0.492754	0.826087	0.884058	0.318841	0.441176	0.057971	0.304348	0.710145	0.811594	0.971014	0.347826
0.383784	0.281081	0.335135	0.206522	0.25	0.217391	0.07027	0.264865	0.535135	0.756757	0.994595	0.032432	0.205405	0.491892	0.697297	0.989189	0.005405	0.210811	0.459459	0.745946	1	0.291892	0.124324	0.583784	0.054348	0.097826	0	0.005405	0.221622	0.475676	0.691892	1	0.010811	0.032432	0.459459	0.6	0.875676	0.07027	0.286486	0.518919	0.772973	0.989189	0.535135	0.423913	0.010811	0.178378	0.464865	0.681081	0.983784	0.308108
0.303738	0.318692	0.37757	0.172123	0.215154	0.246024	0.005607	0.231776	0.513084	0.720561	0.998131	0.002804	0.253271	0.514953	0.783178	1	0.000935	0.245794	0.480374	0.728972	0.999065	0.343925	0.074766	0.581308	0.033676	0.087933	0.003742	0.000935	0.346729	0.593458	0.803738	1	0.107477	0.240187	0.669159	0.806542	0.974766	0.006542	0.192523	0.439252	0.658879	0.993458	0.609346	0.353601	0.011215	0.264486	0.492523	0.737383	0.997196	0.339252
0.342324	0.40249	0.255187	0.251559	0.180873	0.189189	0.004149	0.197095	0.524896	0.76556	0.993776	0.006224	0.267635	0.537344	0.76971	0.997925	0.002075	0.261411	0.446058	0.672199	1	0.607884	0.1639	0.228216	0.049896	0.06237	0.008316	0.002075	0.257261	0.493776	0.753112	1	0.072614	0.213693	0.423237	0.630705	0.93361	0.03112	0.190871	0.587137	0.732365	0.962656	0.562241	0.31185	0.008299	0.30083	0.506224	0.70332	0.995851	0.406639
0.339207	0.375	0.285793	0.239118	0.198347	0.217631	0.003855	0.23348	0.449339	0.722467	0.999449	0.001101	0.244493	0.528084	0.769824	1	0.000551	0.26652	0.530286	0.749449	0.996696	0.512115	0.201542	0.286344	0.068871	0.063361	0.002755	0.000551	0.285793	0.578744	0.790198	1	0.003304	0.181167	0.546806	0.714758	0.980176	0.009361	0.248348	0.410793	0.604626	0.995044	0.491189	0.361433	0.003304	0.272026	0.526432	0.744493	0.996696	0.389317
0.283333	0.433333	0.283333	0.231504	0.157518	0.245823	0.009524	0.2	0.480952	0.72619	1	0.014286	0.242857	0.530952	0.733333	0.995238	0.002381	0.269048	0.497619	0.780952	0.997619	0.502381	0.221429	0.27619	0.090692	0.052506	0.009547	0.002381	0.252381	0.502381	0.747619	1	0.057143	0.314286	0.65	0.87381	0.988095	0.045238	0.178571	0.4	0.704762	0.795238	0.614286	0.305489	0.007143	0.283333	0.580952	0.761905	0.992857	0.461905
0.34	0.32	0.34	0.183381	0.252149	0.246418	0.014286	0.211429	0.465714	0.708571	0.994286	0.005714	0.288571	0.571429	0.762857	0.971429	0.002857	0.231429	0.497143	0.737143	1	0.454286	0.248571	0.297143	0.091691	0.074499	0.011461	0.002857	0.294286	0.488571	0.72	1	0.108571	0.202857	0.377143	0.642857	0.897143	0.005714	0.18	0.542857	0.86	0.994286	0.685714	0.315186	0.008571	0.262857	0.522857	0.76	0.988571	0.354286
0.287162	0.39527	0.317568	0.223729	0.19322	0.230508	0.037162	0.260135	0.503378	0.719595	1	0.006757	0.182432	0.47973	0.726351	0.972973	0.003378	0.307432	0.489865	0.760135	0.996622	0.236486	0	0.763514	0	0.122034	0	0.003378	0.209459	0.456081	0.668919	1	0	0	0	0	0	0.016892	0.256757	0.527027	0.766892	0.989865	0.503378	0.4	0.016892	0.280405	0.547297	0.783784	0.996622	0.408784
0.14532	0.426108	0.428571	0.116049	0.116049	0.385185	0.012315	0.197044	0.438424	0.719212	0.985222	0.007389	0.231527	0.5	0.736453	1	0.002463	0.268473	0.492611	0.753695	0.997537	0.211823	0.002463	0.785714	0	0.064198	0.004938	0.002463	0.194581	0.423645	0.788177	1	0.874384	0.874384	0.874384	0.874384	0.874384	0.009852	0.253695	0.5	0.738916	0.997537	0.807882	0.148148	0.009852	0.246305	0.492611	0.748768	0.990148	0.408867
0.316327	0.326531	0.357143	0.185567	0.185567	0.226804	0.040816	0.316327	0.602041	0.755102	0.989796	0.020408	0.22449	0.438776	0.673469	0.979592	0.010204	0.153061	0.428571	0.72449	1	0.540816	0.142857	0.316327	0.082474	0.082474	0.020619	0.010204	0.408163	0.561224	0.77551	1	0.255102	0.540816	0.785714	0.816327	0.969388	0.020408	0.081633	0.163265	0.336735	0.612245	0.459184	0.371134	0.05102	0.22449	0.459184	0.653061	0.969388	0.418367
0.363636	0.295455	0.340909	0.191781	0.255708	0.200913	0.009091	0.218182	0.45	0.75	0.995455	0.031818	0.313636	0.545455	0.731818	0.972727	0.004545	0.222727	0.468182	0.722727	1	0.477273	0.340909	0.181818	0.146119	0.027397	0.009132	0.004545	0.4	0.531818	0.759091	1	0.009091	0.309091	0.65	0.813636	0.968182	0.040909	0.127273	0.240909	0.286364	0.381818	0.568182	0.310502	0.013636	0.259091	0.568182	0.718182	0.972727	0.3
0.444444	0.240741	0.314815	0.273292	0.26087	0.136646	0.012346	0.265432	0.444444	0.623457	0.993827	0.030864	0.240741	0.506173	0.734568	0.962963	0.006173	0.179012	0.635802	0.82716	1	0.462963	0.265432	0.271605	0.10559	0.043478	0.006211	0.006173	0.401235	0.518519	0.722222	1	0.030864	0.635802	0.746914	0.845679	0.950617	0.061728	0.123457	0.277778	0.345679	0.987654	0.41358	0.385093	0.018519	0.209877	0.660494	0.833333	0.981481	0.271605
0.353846	0.310769	0.335385	0.212963	0.259259	0.219136	0.018462	0.221538	0.535385	0.76	1	0.009231	0.246154	0.446154	0.726154	0.990769	0.003077	0.267692	0.489231	0.744615	0.993846	0.427692	0.110769	0.461538	0.04321	0.067901	0	0.003077	0.135385	0.335385	0.624615	1	0.030769	0.055385	0.184615	0.501538	0.646154	0.283077	0.483077	0.707692	0.846154	0.993846	0.516923	0.438272	0.015385	0.307692	0.547692	0.772308	0.993846	0.356923
0.382979	0.294833	0.322188	0.246951	0.231707	0.210366	0.012158	0.316109	0.589666	0.81155	1	0.006079	0.203647	0.431611	0.674772	0.99696	0.00304	0.209726	0.449848	0.696049	0.951368	0.370821	0.130699	0.49848	0.04878	0.067073	0	0.00304	0.179331	0.361702	0.547112	1	0.027356	0.158055	0.246201	0.531915	0.677812	0.045593	0.386018	0.711246	0.851064	0.990881	0.480243	0.378049	0.024316	0.24924	0.50152	0.674772	0.960486	0.31307
0.325758	0.454545	0.219697	0.285171	0.140684	0.190114	0.011364	0.193182	0.458333	0.757576	0.996212	0.007576	0.261364	0.534091	0.727273	1	0.003788	0.291667	0.477273	0.689394	0.992424	0.481061	0.087121	0.431818	0.045627	0.091255	0.007605	0.003788	0.147727	0.443182	0.746212	1	0.083333	0.106061	0.371212	0.416667	0.526515	0.125	0.276515	0.617424	0.784091	0.984848	0.496212	0.380228	0.083333	0.268939	0.5	0.731061	0.992424	0.481061
0.276316	0.429276	0.294408	0.252059	0.164745	0.278418	0.018092	0.231908	0.481908	0.741776	1	0.004934	0.233553	0.480263	0.725329	0.996711	0.001645	0.279605	0.527961	0.777961	0.998355	0.368421	0.231908	0.399671	0.080725	0.07743	0.004942	0.001645	0.203947	0.453947	0.753289	1	0.004934	0.161184	0.351974	0.569079	0.927632	0.023026	0.401316	0.621711	0.786184	0.972039	0.654605	0.30972	0.003289	0.263158	0.524671	0.758224	0.995066	0.434211
0.34104	0.421965	0.236994	0.232558	0.197674	0.133721	0.017341	0.364162	0.549133	0.751445	0.988439	0.011561	0.121387	0.381503	0.780347	1	0.00578	0.300578	0.491329	0.693642	0.884393	0.549133	0.017341	0.433526	0.011628	0.104651	0	0.00578	0.132948	0.381503	0.780347	1	0.687861	0.687861	0.687861	0.693642	0.699422	0.213873	0.33526	0.491329	0.647399	0.878613	0.398844	0.465116	0.034682	0.184971	0.421965	0.676301	0.913295	0.473988
0.327225	0.38089	0.291885	0.238532	0.178244	0.23329	0.005236	0.298429	0.549738	0.776178	0.994764	0.002618	0.204188	0.413613	0.700262	0.997382	0.001309	0.268325	0.530105	0.757853	1	0.608639	0.25	0.141361	0.099607	0.031455	0.002621	0.001309	0.208115	0.509162	0.781414	1	0.018325	0.244764	0.422775	0.715969	0.973822	0.370419	0.443717	0.496073	0.606021	0.98822	0.479058	0.440367	0.006545	0.325916	0.537958	0.759162	0.998691	0.405759
0.364929	0.317536	0.317536	0.252381	0.204762	0.204762	0.009479	0.246445	0.554502	0.763033	0.995261	0.037915	0.265403	0.445498	0.663507	0.962085	0.004739	0.208531	0.459716	0.767773	1	0.388626	0.175355	0.436019	0.057143	0.066667	0	0.004739	0.199052	0.412322	0.578199	1	0.056872	0.118483	0.227488	0.327014	0.398104	0.151659	0.563981	0.706161	0.829384	0.985782	0.507109	0.314286	0.047393	0.222749	0.459716	0.7109	0.985782	0.2891
0.184855	0.601336	0.213808	0.227679	0.0625	0.232143	0.037862	0.173719	0.585746	0.792873	0.997773	0.006682	0.276169	0.465479	0.697105	0.995546	0.002227	0.164811	0.52784	0.88196	1	0.888641	0.006682	0.104677	0.002232	0.011161	0.002232	0.002227	0.240535	0.463252	0.685969	1	0.975501	0.975501	0.975501	0.977728	0.979955	0.006682	0.879733	0.906459	0.933185	0.973274	0.160356	0.174107	0.006682	0.073497	0.730512	0.926503	0.991091	0.608018
0.386555	0.226891	0.386555	0.228814	0.364407	0.161017	0.02521	0.285714	0.504202	0.714286	0.983193	0.016807	0.159664	0.378151	0.722689	0.97479	0.008403	0.235294	0.563025	0.747899	1	0.352941	0.184874	0.462185	0.059322	0.09322	0.025424	0.008403	0.117647	0.588235	0.756303	1	0.243697	0.537815	0.672269	0.815126	0.966387	0.033613	0.193277	0.361345	0.504202	0.991597	0.495798	0.474576	0.033613	0.243697	0.487395	0.731092	0.97479	0.285714
0.280148	0.41744	0.302412	0.223048	0.17658	0.226766	0.007421	0.28757	0.519481	0.797774	1	0.003711	0.243043	0.500928	0.734694	0.996289	0.001855	0.217069	0.461967	0.706865	0.992579	0.58256	0.220779	0.19666	0.081784	0.05948	0.011152	0.001855	0.282004	0.478664	0.786642	1	0.005566	0.107607	0.233766	0.591837	0.888683	0.037106	0.510204	0.721707	0.782931	0.994434	0.608534	0.304833	0.005566	0.233766	0.439703	0.660482	0.935065	0.437848
0.274194	0.290323	0.435484	0.180328	0.278689	0.262295	0.048387	0.209677	0.370968	0.580645	0.983871	0.032258	0.112903	0.5	0.66129	1	0.016129	0.258065	0.516129	0.741935	0.919355	0.241935	0.16129	0.596774	0.032787	0.032787	0	0.016129	0.048387	0.112903	0.33871	1	0.145161	0.16129	0.209677	0.241935	0.290323	0.387097	0.516129	0.66129	0.806452	0.967742	0.564516	0.42623	0.080645	0.290323	0.612903	0.790323	0.951613	0.241935
0.317901	0.37963	0.302469	0.247678	0.20743	0.25387	0.024691	0.268519	0.481481	0.734568	1	0.009259	0.222222	0.567901	0.777778	0.993827	0.003086	0.240741	0.459877	0.70679	0.996914	0.503086	0.287037	0.209877	0.133127	0.04644	0.003096	0.003086	0.20679	0.453704	0.731481	1	0.012346	0.166667	0.475309	0.851852	0.993827	0.216049	0.333333	0.555556	0.70679	0.777778	0.645062	0.346749	0.006173	0.225309	0.462963	0.697531	0.987654	0.348765
0.232704	0.446541	0.320755	0.227129	0.176656	0.26183	0.012579	0.210692	0.578616	0.773585	0.993711	0.025157	0.254717	0.468553	0.72956	1	0.003145	0.251572	0.484277	0.745283	0.977987	0.471698	0.245283	0.283019	0.100946	0.056782	0.006309	0.003145	0.254717	0.5	0.811321	1	0.012579	0.27673	0.487421	0.786164	0.918239	0.034591	0.22327	0.518868	0.58805	0.962264	0.556604	0.359621	0.009434	0.27044	0.440252	0.716981	0.996855	0.490566
0.257453	0.525745	0.216802	0.30163	0.095109	0.258152	0.01626	0.241192	0.504065	0.777778	0.99458	0.00542	0.252033	0.493225	0.728997	0.99729	0.00271	0.230352	0.476965	0.766938	1	0.452575	0.121951	0.425474	0.048913	0.092391	0.005435	0.00271	0.186992	0.436314	0.688347	1	0.051491	0.154472	0.224932	0.769648	0.95935	0.065041	0.314363	0.566396	0.739837	0.99729	0.552846	0.396739	0.04336	0.252033	0.476965	0.728997	0.98916	0.604336
0.274566	0.33815	0.387283	0.185507	0.150725	0.243478	0.008671	0.384393	0.508671	0.794798	0.99422	0.011561	0.213873	0.50289	0.797688	0.99711	0.00289	0.208092	0.424855	0.653179	1	0.430636	0.132948	0.436416	0.057971	0.063768	0.005797	0.00289	0.202312	0.468208	0.846821	1	0.101156	0.150289	0.291908	0.508671	0.916185	0.008671	0.312139	0.572254	0.696532	0.985549	0.580925	0.330435	0.014451	0.231214	0.552023	0.725434	0.991329	0.352601
0.286624	0.420382	0.292994	0.233227	0.15016	0.249201	0.006369	0.33758	0.570064	0.754777	0.996815	0.003185	0.175159	0.394904	0.694268	0.993631	0.076433	0.328025	0.55414	0.783439	1	0.665605	0.273885	0.06051	0.140575	0.019169	0	0.003185	0.200637	0.487261	0.748408	1	0.089172	0.270701	0.429936	0.60828	0.94586	0.286624	0.296178	0.828025	0.875796	0.89172	0.538217	0.345048	0.047771	0.286624	0.509554	0.732484	0.990446	0.449045
0.227787	0.426494	0.345719	0.161812	0.122977	0.31068	0.008078	0.177706	0.476575	0.594507	0.993538	0.003231	0.263328	0.529887	0.768982	0.995153	0.001616	0.250404	0.47496	0.788368	1	0.397415	0.03231	0.570275	0.019417	0.064725	0.009709	0.001616	0.229402	0.505654	0.662359	1	0.07916	0.357027	0.600969	0.882068	0.998384	0.071082	0.245557	0.470113	0.799677	0.991922	0.718901	0.210356	0.012924	0.247173	0.481422	0.77706	0.996769	0.442649
0.439815	0.37963	0.180556	0.427907	0.181395	0.12093	0.018519	0.217593	0.49537	0.75463	1	0.009259	0.194444	0.444444	0.643519	0.99537	0.00463	0.324074	0.675926	0.824074	0.944444	0.671296	0.25	0.078704	0.093023	0.009302	0	0.00463	0.166667	0.458333	0.657407	1	0.375	0.615741	0.782407	0.87963	0.949074	0.259259	0.273148	0.291667	0.310185	0.333333	0.319444	0.27907	0.023148	0.37037	0.611111	0.782407	0.944444	0.5
0.271845	0.436893	0.291262	0.245098	0.156863	0.205882	0.019417	0.330097	0.504854	0.747573	1	0.067961	0.262136	0.466019	0.728155	0.990291	0.009709	0.135922	0.495146	0.718447	0.961165	0.708738	0.07767	0.213592	0.058824	0.058824	0	0.009709	0.31068	0.563107	0.776699	1	0.504854	0.514563	0.718447	0.834951	0.854369	0.048544	0.087379	0.145631	0.359223	0.757282	0.495146	0.411765	0.048544	0.174757	0.504854	0.796117	0.961165	0.417476
0.419811	0.235849	0.34434	0.210402	0.304965	0.160757	0.004717	0.247642	0.490566	0.707547	0.992925	0.007075	0.287736	0.495283	0.759434	1	0.002358	0.231132	0.509434	0.771226	0.990566	0.214623	0.049528	0.735849	0.016548	0.06383	0.007092	0.002358	0.146226	0.681604	0.856132	1	0.014151	0.023585	0.820755	0.860849	0.884434	0.035377	0.261792	0.445755	0.674528	0.96934	0.488208	0.477541	0.016509	0.245283	0.495283	0.754717	0.990566	0.254717
0.341969	0.34456	0.313472	0.18961	0.223377	0.257143	0.007772	0.277202	0.536269	0.779793	1	0.012953	0.243523	0.466321	0.699482	0.992228	0.002591	0.202073	0.484456	0.764249	0.989637	0.440415	0.15544	0.404145	0.090909	0.080519	0.002597	0.002591	0.246114	0.481865	0.743523	1	0.134715	0.264249	0.458549	0.603627	0.84715	0.041451	0.233161	0.564767	0.800518	0.992228	0.647668	0.337662	0.005181	0.240933	0.463731	0.689119	0.989637	0.323834
0.310748	0.35514	0.334112	0.215457	0.208431	0.252927	0.021028	0.254673	0.497664	0.686916	1	0.007009	0.240654	0.483645	0.768692	0.997664	0.002336	0.259346	0.523364	0.771028	0.990654	0.483645	0.130841	0.385514	0.035129	0.053864	0.007026	0.002336	0.226636	0.439252	0.759346	1	0.011682	0.121495	0.443925	0.843458	0.988318	0.030374	0.327103	0.542056	0.668224	0.971963	0.60514	0.332553	0.004673	0.233645	0.471963	0.726636	0.992991	0.366822
0.275087	0.408304	0.316609	0.2513	0.169844	0.272097	0.031142	0.294118	0.517301	0.742215	1	0.00346	0.230104	0.480969	0.726644	0.99827	0.00173	0.211073	0.487889	0.785467	0.991349	0.49827	0.361592	0.140138	0.142114	0.041594	0	0.00173	0.301038	0.539792	0.740484	1	0.051903	0.224913	0.474048	0.686851	0.951557	0.00519	0.038062	0.366782	0.858131	0.989619	0.622837	0.322357	0.00692	0.231834	0.49481	0.782007	0.989619	0.377163
0.352147	0.341104	0.306748	0.19656	0.184275	0.219902	0.009816	0.206135	0.474847	0.820859	0.995092	0.004908	0.228221	0.489571	0.705521	1	0.001227	0.276074	0.512883	0.731288	0.998773	0.468712	0.068712	0.462577	0.029484	0.081081	0.004914	0.001227	0.161963	0.537423	0.792638	1	0.089571	0.477301	0.618405	0.690798	0.990184	0.028221	0.282209	0.455215	0.744785	0.96319	0.559509	0.356265	0.013497	0.263804	0.495706	0.703067	0.990184	0.397546
0.360952	0.29619	0.342857	0.20877	0.258341	0.204004	0.00381	0.245714	0.514286	0.775238	0.99619	0.001905	0.231429	0.477143	0.722857	1	0.000952	0.26	0.499048	0.73619	0.999048	0.402857	0.172381	0.424762	0.085796	0.070543	0.00572	0.000952	0.251429	0.38381	0.635238	1	0.03619	0.235238	0.488571	0.879048	0.999048	0.006667	0.268571	0.610476	0.759048	0.964762	0.58381	0.390848	0.004762	0.233333	0.49619	0.706667	0.999048	0.308571
0.275229	0.449541	0.275229	0.267281	0.133641	0.239631	0.009174	0.284404	0.495413	0.788991	1	0.013761	0.233945	0.5	0.738532	0.990826	0.004587	0.243119	0.43578	0.711009	0.986239	0.522936	0.243119	0.233945	0.096774	0.050691	0.004608	0.004587	0.220183	0.504587	0.678899	1	0.055046	0.243119	0.62844	0.784404	0.894495	0.105505	0.279817	0.353211	0.931193	0.990826	0.582569	0.387097	0.013761	0.247706	0.5	0.738532	0.986239	0.5
0.324022	0.379888	0.296089	0.207865	0.241573	0.247191	0.01676	0.268156	0.469274	0.659218	0.994413	0.011173	0.201117	0.47486	0.726257	1	0.005587	0.284916	0.536313	0.815642	0.98324	0.620112	0.22905	0.150838	0.106742	0.02809	0.016854	0.005587	0.217877	0.497207	0.726257	1	0.039106	0.184358	0.446927	0.804469	0.98324	0.296089	0.351955	0.52514	0.564246	0.871508	0.569832	0.337079	0.03352	0.234637	0.435754	0.804469	0.98324	0.368715
0.266667	0.438095	0.295238	0.192308	0.144231	0.192308	0.085714	0.238095	0.561905	0.790476	1	0.047619	0.171429	0.457143	0.714286	0.952381	0.009524	0.314286	0.47619	0.72381	0.961905	0.457143	0.180952	0.361905	0.086538	0.067308	0.009615	0.009524	0.152381	0.285714	0.695238	1	0.019048	0.047619	0.32381	0.72381	0.952381	0.409524	0.485714	0.609524	0.809524	0.933333	0.504762	0.346154	0.019048	0.342857	0.495238	0.72381	0.961905	0.428571
0.288889	0.411111	0.3	0.206704	0.223464	0.251397	0.016667	0.222222	0.466667	0.772222	1	0.011111	0.244444	0.483333	0.722222	0.988889	0.005556	0.261111	0.511111	0.75	0.994444	0.622222	0.183333	0.194444	0.100559	0.044693	0	0.005556	0.283333	0.516667	0.766667	1	0.077778	0.361111	0.716667	0.805556	0.944444	0.016667	0.055556	0.161111	0.411111	0.605556	0.516667	0.357542	0.033333	0.355556	0.5	0.711111	0.983333	0.433333
0.239645	0.47929	0.281065	0.216617	0.163205	0.267062	0.005917	0.266272	0.58284	0.784024	0.994083	0.026627	0.236686	0.505917	0.754438	1	0.002959	0.198225	0.446746	0.704142	0.961538	0.414201	0.162722	0.423077	0.068249	0.086053	0.002967	0.002959	0.272189	0.544379	0.763314	1	0.153846	0.201183	0.381657	0.553254	0.881657	0.008876	0.115385	0.523669	0.801775	0.961538	0.656805	0.350148	0.011834	0.248521	0.494083	0.698225	0.988166	0.494083
0.319927	0.400366	0.279707	0.239927	0.181319	0.252747	0.005484	0.210238	0.460695	0.689214	0.989031	0.003656	0.239488	0.493601	0.753199	1	0.001828	0.277879	0.510055	0.773309	0.996344	0.409506	0.246801	0.343693	0.104396	0.071429	0.005495	0.001828	0.213894	0.473492	0.722121	1	0.009141	0.360146	0.563071	0.702011	0.932358	0.031079	0.246801	0.482633	0.751371	0.978062	0.586837	0.435897	0.010969	0.268739	0.521024	0.780622	0.996344	0.420475
0.308421	0.408421	0.283158	0.229715	0.186512	0.231823	0.008421	0.226316	0.455789	0.685263	1	0.003158	0.213684	0.492632	0.756842	0.996842	0.001053	0.348421	0.551579	0.782105	0.998947	0.553684	0.130526	0.315789	0.051633	0.074816	0.003161	0.001053	0.214737	0.486316	0.746316	1	0.034737	0.428421	0.652632	0.811579	0.875789	0.005263	0.273684	0.418947	0.684211	0.957895	0.524211	0.364594	0.004211	0.36	0.568421	0.754737	0.992632	0.411579
0.1875	0.321429	0.491071	0.125373	0.191045	0.340299	0.020833	0.166667	0.467262	0.797619	0.979167	0.005952	0.303571	0.502976	0.690476	0.988095	0.002976	0.235119	0.488095	0.758929	1	0.258929	0.083333	0.657738	0.032836	0.044776	0.002985	0.002976	0.389881	0.666667	0.886905	1	0.505952	0.529762	0.931548	0.952381	0.997024	0.032738	0.223214	0.386905	0.627976	0.877976	0.717262	0.274627	0.011905	0.252976	0.508929	0.747024	0.997024	0.3125
0.138973	0.410876	0.450151	0.10303	0.112121	0.424242	0.009063	0.247734	0.564955	0.854985	1	0.021148	0.277946	0.543807	0.725076	0.993958	0.003021	0.214502	0.425982	0.734139	0.990937	0.256798	0.048338	0.694864	0.012121	0.072727	0.012121	0.003021	0.347432	0.483384	0.719033	1	0.567976	0.577039	0.740181	0.755287	0.984894	0.006042	0.21148	0.450151	0.761329	0.990937	0.806647	0.187879	0.015106	0.23565	0.486405	0.731118	0.990937	0.407855
0.242545	0.435388	0.322068	0.219124	0.111554	0.260956	0.003976	0.316103	0.467197	0.628231	0.968191	0.00994	0.248509	0.536779	0.747515	1	0.001988	0.166998	0.518887	0.7833	0.998012	0.502982	0.05169	0.445328	0.027888	0.059761	0.003984	0.001988	0.272366	0.439364	0.596421	1	0.06163	0.204771	0.429423	0.497018	0.71173	0.00994	0.170974	0.727634	0.852883	0.998012	0.620278	0.250996	0.007952	0.202783	0.600398	0.803181	0.998012	0.419483
0.162037	0.351852	0.486111	0.093023	0.130233	0.330233	0.037037	0.314815	0.578704	0.810185	0.99537	0.009259	0.226852	0.458333	0.74537	1	0.00463	0.231481	0.490741	0.722222	0.990741	0.152778	0	0.847222	0	0.055814	0	0.00463	0.402778	0.527778	0.791667	1	0	0	0	0	0	0.009259	0.212963	0.490741	0.740741	0.990741	0.791667	0.186047	0.013889	0.217593	0.481481	0.731481	0.990741	0.356481
0.340708	0.39823	0.261062	0.302222	0.208889	0.186667	0.013274	0.256637	0.486726	0.778761	1	0.00885	0.230088	0.477876	0.738938	0.969027	0.004425	0.216814	0.513274	0.681416	0.99115	0.561947	0.234513	0.20354	0.111111	0.084444	0.004444	0.004425	0.230088	0.433628	0.783186	1	0.017699	0.185841	0.39823	0.654867	0.809735	0.039823	0.513274	0.646018	0.871681	0.946903	0.5	0.337778	0.017699	0.221239	0.460177	0.676991	0.938053	0.424779
0.295775	0.211268	0.492958	0.071429	0.271429	0.242857	0.225352	0.492958	0.577465	0.816901	0.985915	0.070423	0.126761	0.267606	0.661972	0.887324	0.014085	0.169014	0.380282	0.71831	1	0.380282	0.169014	0.450704	0.028571	0.114286	0.028571	0.014085	0.239437	0.478873	0.859155	1	0.169014	0.197183	0.309859	0.352113	0.394366	0.084507	0.422535	0.605634	0.71831	0.901408	0.633803	0.342857	0.056338	0.253521	0.422535	0.704225	0.915493	0.239437
0.497238	0.281768	0.220994	0.266667	0.233333	0.094444	0.016575	0.243094	0.519337	0.745856	0.994475	0.01105	0.149171	0.337017	0.662983	1	0.005525	0.40884	0.596685	0.762431	0.972376	0.58011	0.038674	0.381215	0.022222	0.088889	0	0.005525	0.248619	0.39779	0.790055	1	0.104972	0.104972	0.116022	0.425414	0.436464	0.138122	0.298343	0.61326	0.740331	0.977901	0.226519	0.333333	0.110497	0.41989	0.607735	0.756906	0.98895	0.353591
0.201893	0.350158	0.44795	0.120253	0.129747	0.348101	0.028391	0.283912	0.419558	0.84858	1	0.012618	0.179811	0.463722	0.741325	0.987382	0.003155	0.280757	0.529968	0.725552	0.974763	0.318612	0.044164	0.637224	0.031646	0.044304	0	0.003155	0.104101	0.599369	0.902208	1	0.006309	0.012618	0.864353	0.873817	0.962145	0.085174	0.258675	0.476341	0.652997	0.946372	0.750789	0.221519	0.006309	0.252366	0.476341	0.697161	0.974763	0.299685
0.390728	0.225166	0.384106	0.126667	0.313333	0.246667	0.033113	0.218543	0.490066	0.774834	0.993377	0.013245	0.298013	0.483444	0.629139	0.986755	0.006623	0.225166	0.496689	0.754967	1	0.350993	0.364238	0.284768	0.1	0.046667	0.006667	0.006623	0.291391	0.476821	0.642384	1	0.145695	0.251656	0.688742	0.827815	0.986755	0.02649	0.086093	0.357616	0.596026	0.953642	0.423841	0.533333	0.02649	0.245033	0.483444	0.675497	0.986755	0.324503
0.25034	0.397279	0.352381	0.202997	0.162125	0.264305	0.009524	0.322449	0.526531	0.797279	0.998639	0.005442	0.22585	0.511565	0.767347	1	0.001361	0.228571	0.444898	0.682993	0.968707	0.318367	0.09932	0.582313	0.038147	0.057221	0.008174	0.001361	0.157823	0.635374	0.82585	1	0.004082	0.647619	0.719728	0.863946	0.938776	0.038095	0.27619	0.438095	0.590476	0.967347	0.642177	0.313351	0.002721	0.254422	0.468027	0.710204	0.967347	0.402721
0.54454	0.284483	0.170977	0.319424	0.178417	0.094964	0.00431	0.280172	0.545977	0.800287	0.998563	0.002874	0.252874	0.456897	0.724138	0.997126	0.001437	0.12931	0.340517	0.604885	1	0.376437	0.00431	0.619253	0.002878	0.071942	0.002878	0.001437	0.579023	0.744253	0.863506	1	0.857759	0.857759	0.857759	0.859195	0.987069	0.011494	0.163793	0.318966	0.527299	0.997126	0.188218	0.284892	0.007184	0.087644	0.265805	0.534483	0.984195	0.267241
0.127139	0.481663	0.391198	0.132353	0.063725	0.414216	0.00978	0.210269	0.432763	0.711491	0.99022	0.00489	0.242054	0.471883	0.716381	1	0.002445	0.256724	0.530562	0.772616	0.992665	0.207824	0.00489	0.787286	0.002451	0.07598	0.002451	0.002445	0.210269	0.503667	0.638142	1	0.017115	0.017115	0.017115	0.017115	0.01956	0.022005	0.256724	0.486553	0.760391	0.977995	0.819071	0.117647	0.007335	0.239609	0.466993	0.757946	0.98044	0.481663
0.340192	0.337449	0.322359	0.208791	0.21978	0.222527	0.002743	0.251029	0.539095	0.784636	0.997257	0.004115	0.266118	0.466392	0.72428	0.990398	0.001372	0.216735	0.482853	0.721536	1	0.360768	0.116598	0.522634	0.042582	0.067308	0.004121	0.001372	0.226337	0.423868	0.702332	1	0.019204	0.097394	0.21262	0.432099	0.707819	0.006859	0.375857	0.624143	0.823045	0.979424	0.51989	0.436813	0.006859	0.242798	0.473251	0.69273	0.998628	0.322359
0.32646	0.33677	0.33677	0.234483	0.186207	0.251724	0.010309	0.274914	0.494845	0.714777	0.993127	0.006873	0.216495	0.508591	0.766323	1	0.003436	0.223368	0.487973	0.738832	0.996564	0.381443	0.243986	0.37457	0.086207	0.1	0.010345	0.003436	0.233677	0.47079	0.683849	1	0.017182	0.33677	0.546392	0.697595	0.879725	0.054983	0.250859	0.484536	0.821306	0.996564	0.61512	0.344828	0.013746	0.19244	0.457045	0.721649	0.996564	0.340206
0.322222	0.3	0.377778	0.240223	0.178771	0.22905	0.016667	0.3	0.472222	0.7	1	0.011111	0.255556	0.594444	0.783333	0.988889	0.005556	0.172222	0.438889	0.711111	0.994444	0.538889	0.272222	0.188889	0.094972	0.027933	0.005587	0.005556	0.3	0.583333	0.761111	1	0.222222	0.366667	0.527778	0.677778	0.961111	0.055556	0.094444	0.144444	0.188889	0.872222	0.566667	0.268156	0.083333	0.233333	0.45	0.705556	0.994444	0.305556
0.192308	0.387574	0.420118	0.130564	0.148368	0.296736	0.014793	0.281065	0.497041	0.786982	0.997041	0.008876	0.210059	0.476331	0.745562	0.967456	0.002959	0.269231	0.511834	0.739645	1	0.289941	0.06213	0.647929	0.020772	0.074184	0.008902	0.002959	0.204142	0.431953	0.804734	1	0.109467	0.121302	0.159763	0.183432	0.609467	0.005917	0.360947	0.56213	0.760355	0.991124	0.698225	0.261128	0.011834	0.284024	0.497041	0.707101	0.991124	0.366864
0.238806	0.41791	0.343284	0.30303	0.106061	0.30303	0.089552	0.179104	0.313433	0.731343	1	0.029851	0.223881	0.552239	0.716418	0.970149	0.014925	0.298507	0.432836	0.791045	0.985075	0.58209	0.074627	0.343284	0.060606	0.060606	0	0.014925	0.179104	0.522388	0.671642	1	0.044776	0.044776	0.059701	0.074627	0.701493	0.253731	0.313433	0.402985	0.820896	0.910448	0.462687	0.272727	0.059701	0.358209	0.492537	0.835821	0.955224	0.402985
0.194175	0.475728	0.330097	0.176471	0.098039	0.362745	0.07767	0.378641	0.524272	0.68932	0.980583	0.019417	0.203883	0.446602	0.650485	1	0.009709	0.213592	0.553398	0.786408	0.961165	0.582524	0.067961	0.349515	0.058824	0.039216	0	0.009709	0.339806	0.495146	0.68932	1	0.485437	0.485437	0.543689	0.563107	0.951456	0.106796	0.184466	0.271845	0.76699	0.854369	0.533981	0.27451	0.029126	0.223301	0.427184	0.737864	0.961165	0.446602
0.356923	0.283077	0.36	0.209877	0.259259	0.175926	0.018462	0.283077	0.541538	0.775385	0.987692	0.009231	0.301538	0.495385	0.750769	1	0.003077	0.175385	0.415385	0.652308	0.990769	0.387692	0.172308	0.44	0.055556	0.074074	0.012346	0.003077	0.243077	0.550769	0.803077	1	0.070769	0.375385	0.569231	0.704615	0.944615	0.012308	0.138462	0.458462	0.636923	0.993846	0.510769	0.32716	0.006154	0.224615	0.452308	0.683077	0.993846	0.307692
0.153153	0.423423	0.423423	0.131222	0.122172	0.38009	0.130631	0.247748	0.540541	0.891892	0.986486	0.009009	0.234234	0.481982	0.72973	1	0.004505	0.238739	0.504505	0.693694	0.995495	0.252252	0.013514	0.734234	0.00905	0.081448	0	0.004505	0.202703	0.40991	0.90991	1	0.504505	0.504505	0.504505	0.509009	0.513514	0.009009	0.256757	0.54955	0.734234	0.954955	0.698198	0.171946	0.013514	0.220721	0.45045	0.698198	0.936937	0.414414
0.313261	0.479702	0.207037	0.23155	0.150305	0.170616	0.001353	0.20433	0.453315	0.650203	0.996617	0.00203	0.271313	0.494587	0.836265	0.998647	0.000677	0.302436	0.552097	0.688769	1	0.655616	0.050744	0.29364	0.024374	0.05281	0.004062	0.000677	0.322057	0.539919	0.82747	1	0.085927	0.258457	0.652909	0.700271	0.999323	0.010825	0.198241	0.326793	0.588633	0.839648	0.401894	0.377793	0.010825	0.279432	0.564276	0.776725	0.997294	0.465494
0.475728	0.339806	0.184466	0.343137	0.176471	0.088235	0.029126	0.242718	0.582524	0.786408	1	0.019417	0.23301	0.398058	0.592233	0.980583	0.009709	0.135922	0.553398	0.718447	0.932039	0.61165	0.07767	0.31068	0.019608	0.058824	0	0.009709	0.145631	0.378641	0.61165	1	0.533981	0.543689	0.563107	0.582524	0.601942	0.194175	0.262136	0.747573	0.873786	0.951456	0.194175	0.196078	0.15534	0.300971	0.563107	0.708738	0.941748	0.368932
0.258065	0.435484	0.306452	0.264865	0.178378	0.27027	0.037634	0.252688	0.44086	0.741935	0.994624	0.016129	0.263441	0.505376	0.72043	1	0.005376	0.188172	0.483871	0.768817	0.978495	0.360215	0.215054	0.424731	0.075676	0.075676	0	0.005376	0.198925	0.44086	0.698925	1	0.010753	0.069892	0.392473	0.655914	0.88172	0.096774	0.295699	0.591398	0.795699	0.978495	0.543011	0.443243	0.021505	0.263441	0.505376	0.725806	0.989247	0.413978
[truncated: 438 more rows]
[truncated: 83 more columns]
