# Supplementary material for: Prediction of RNA‐Binding Proteins by Voting Systems
Source: Hindawi journal article supplement (doi:10.1155/2011/506205), 2011-01-01
Supplement: f1 [file 506205.f1.zip › testSet3.csv]

v1	v2	v3	v4	v5	v6	v7	v8	v9	v10	v11	v12	v13	v14	v15	v16	v17	v18	v19	v20	v21	v22	v23	v24	v25	v26	v27	v28	v29	v30	v31	v32	v33	v34	v35	v36	v37	v38	v39	v40	v41	v42	v43	v44	v45	v46	v47	v48	v49	v50
0.390244	0.34334	0.266417	0.229323	0.24812	0.171053	0.013133	0.247655	0.478424	0.748593	0.994371	0.003752	0.292683	0.527205	0.742964	1	0.001876	0.212008	0.474672	0.756098	0.998124	0.562852	0.135084	0.302064	0.06015	0.067669	0.007519	0.001876	0.35272	0.555347	0.818011	1	0.015009	0.566604	0.688555	0.786116	0.981238	0.018762	0.140713	0.253283	0.472795	0.938086	0.35272	0.417293	0.009381	0.21576	0.529081	0.793621	0.979362	0.377111
0.421569	0.279412	0.29902	0.241379	0.241379	0.162562	0.014706	0.205882	0.495098	0.754902	0.990196	0.009804	0.259804	0.490196	0.715686	0.980392	0.004902	0.254902	0.485294	0.740196	1	0.446078	0.382353	0.171569	0.167488	0.029557	0	0.004902	0.171569	0.54902	0.764706	1	0.078431	0.220588	0.509804	0.686275	0.965686	0.04902	0.416667	0.460784	0.823529	0.867647	0.460784	0.463054	0.019608	0.308824	0.519608	0.681373	0.955882	0.294118
0.402571	0.329499	0.26793	0.232905	0.182126	0.181449	0.003383	0.274019	0.560893	0.81935	1	0.002706	0.284844	0.521651	0.759134	0.999323	0.000677	0.185386	0.384303	0.594723	0.983085	0.441137	0.02977	0.529093	0.010833	0.102911	0.005416	0.000677	0.34912	0.728687	0.854533	1	0.021651	0.093369	0.432341	0.520298	0.650203	0.003383	0.227334	0.402571	0.613667	0.99797	0.412043	0.291131	0.00203	0.186062	0.370771	0.564276	0.972936	0.343708
0.298343	0.439227	0.262431	0.246537	0.166205	0.213296	0.008287	0.298343	0.533149	0.803867	1	0.005525	0.207182	0.455801	0.743094	0.997238	0.002762	0.273481	0.5	0.720994	0.991713	0.502762	0.11326	0.383978	0.066482	0.121884	0	0.002762	0.212707	0.436464	0.726519	1	0.013812	0.171271	0.417127	0.571823	0.690608	0.066298	0.345304	0.599448	0.823204	0.991713	0.480663	0.415512	0.01105	0.245856	0.447514	0.68232	0.991713	0.417127
0.434211	0.25	0.315789	0.205298	0.304636	0.165563	0.013158	0.276316	0.460526	0.684211	1	0.085526	0.256579	0.552632	0.769737	0.986842	0.006579	0.164474	0.539474	0.796053	0.993421	0.355263	0.315789	0.328947	0.13245	0.05298	0.013245	0.006579	0.144737	0.552632	0.763158	1	0.013158	0.243421	0.605263	0.868421	0.967105	0.059211	0.309211	0.394737	0.473684	0.802632	0.375	0.450331	0.019737	0.197368	0.506579	0.723684	0.953947	0.263158
0.455128	0.294872	0.25	0.303226	0.206452	0.122581	0.044872	0.301282	0.564103	0.782051	1	0.032051	0.179487	0.532051	0.717949	0.974359	0.00641	0.134615	0.403846	0.557692	0.935897	0.423077	0.166667	0.410256	0.077419	0.103226	0.012903	0.00641	0.352564	0.698718	0.871795	1	0.012821	0.237179	0.314103	0.512821	0.935897	0.044872	0.141026	0.423077	0.641026	0.839744	0.301282	0.309677	0.012821	0.179487	0.339744	0.480769	0.897436	0.269231
0.369863	0.332192	0.297945	0.250859	0.209622	0.216495	0.010274	0.222603	0.520548	0.760274	0.993151	0.006849	0.318493	0.486301	0.719178	0.996575	0.003425	0.215753	0.476027	0.732877	1	0.30137	0.089041	0.609589	0.030928	0.079038	0.003436	0.003425	0.178082	0.506849	0.770548	1	0.010274	0.027397	0.078767	0.106164	0.174658	0.143836	0.349315	0.547945	0.75	0.962329	0.506849	0.357388	0.013699	0.267123	0.493151	0.722603	0.952055	0.291096
0.441057	0.306911	0.252033	0.295316	0.203666	0.120163	0.012195	0.319106	0.591463	0.808943	1	0.004065	0.213415	0.473577	0.772358	0.997967	0.002033	0.191057	0.400407	0.581301	0.945122	0.593496	0.168699	0.237805	0.077393	0.077393	0	0.002033	0.231707	0.50813	0.794715	1	0.004065	0.189024	0.319106	0.581301	0.857724	0.046748	0.373984	0.520325	0.780488	0.989837	0.373984	0.321792	0.006098	0.150407	0.337398	0.573171	0.945122	0.357724
0.350711	0.364929	0.28436	0.238095	0.261905	0.171429	0.009479	0.21327	0.445498	0.687204	1	0.037915	0.28436	0.56872	0.862559	0.985782	0.004739	0.251185	0.450237	0.677725	0.85782	0.445498	0.379147	0.175355	0.119048	0.071429	0.004762	0.004739	0.274882	0.601896	0.815166	1	0.014218	0.293839	0.436019	0.611374	0.853081	0.080569	0.218009	0.260664	0.748815	0.990521	0.421801	0.447619	0.018957	0.246445	0.436019	0.672986	0.943128	0.398104
0.394928	0.235507	0.369565	0.152727	0.32	0.167273	0.007246	0.231884	0.471014	0.768116	0.996377	0.01087	0.224638	0.543478	0.67029	0.963768	0.003623	0.26087	0.503623	0.742754	1	0.394928	0.188406	0.416667	0.050909	0.094545	0.007273	0.003623	0.163043	0.40942	0.666667	1	0.134058	0.300725	0.387681	0.612319	0.706522	0.036232	0.264493	0.539855	0.84058	0.992754	0.550725	0.421818	0.021739	0.23913	0.481884	0.684783	0.98913	0.271739
0.404624	0.289017	0.306358	0.244186	0.255814	0.180233	0.011561	0.260116	0.433526	0.705202	0.988439	0.046243	0.231214	0.624277	0.803468	1	0.00578	0.179191	0.445087	0.67052	0.976879	0.369942	0.265896	0.364162	0.104651	0.05814	0.011628	0.00578	0.138728	0.508671	0.722543	1	0.011561	0.208092	0.526012	0.757225	0.843931	0.144509	0.294798	0.387283	0.606936	0.988439	0.364162	0.465116	0.017341	0.179191	0.456647	0.676301	0.976879	0.289017
0.459916	0.232068	0.308017	0.211864	0.292373	0.161017	0.012658	0.248945	0.489451	0.751055	1	0.008439	0.261603	0.438819	0.662447	0.995781	0.004219	0.21519	0.523207	0.767932	0.978903	0.362869	0.177215	0.459916	0.04661	0.072034	0.004237	0.004219	0.206751	0.35443	0.7173	1	0.016878	0.080169	0.160338	0.248945	0.734177	0.362869	0.493671	0.628692	0.801688	0.974684	0.333333	0.466102	0.033755	0.244726	0.514768	0.742616	0.978903	0.265823
0.351946	0.368866	0.279188	0.262712	0.205085	0.20678	0.003384	0.169205	0.423012	0.690355	0.998308	0.006768	0.307953	0.558376	0.778342	1	0.001692	0.277496	0.507614	0.771574	0.98308	0.516074	0.245347	0.238579	0.09661	0.049153	0.005085	0.001692	0.260575	0.519459	0.763113	1	0.093063	0.279188	0.467005	0.780034	0.984772	0.01692	0.179357	0.582064	0.725888	0.947547	0.509306	0.359322	0.015228	0.331641	0.546531	0.783418	0.986464	0.387479
0.334582	0.360799	0.304619	0.25	0.21125	0.215	0.011236	0.245943	0.51186	0.757803	1	0.002497	0.260924	0.515605	0.755306	0.996255	0.001248	0.2397	0.469413	0.701623	0.998752	0.43196	0.174782	0.393258	0.0925	0.0775	0.0025	0.001248	0.278402	0.526841	0.787765	1	0.021223	0.194757	0.423221	0.875156	0.998752	0.041199	0.269663	0.500624	0.635456	0.957553	0.516854	0.4025	0.004994	0.25593	0.456929	0.681648	0.996255	0.39201
0.334615	0.388462	0.276923	0.258687	0.220077	0.216216	0.057692	0.346154	0.553846	0.773077	0.996154	0.007692	0.203846	0.419231	0.707692	1	0.003846	0.219231	0.5	0.75	0.988462	0.526923	0.246154	0.226923	0.100386	0.061776	0	0.003846	0.223077	0.369231	0.680769	1	0.015385	0.434615	0.6	0.834615	0.992308	0.042308	0.134615	0.534615	0.769231	0.930769	0.403846	0.362934	0.011538	0.188462	0.496154	0.780769	0.988462	0.396154
0.397576	0.345455	0.25697	0.256068	0.199029	0.163835	0.006061	0.306667	0.58303	0.803636	1	0.002424	0.220606	0.464242	0.718788	0.995152	0.001212	0.21697	0.398788	0.667879	0.997576	0.446061	0.124848	0.429091	0.052184	0.076456	0.003641	0.001212	0.236364	0.569697	0.740606	1	0.048485	0.246061	0.395152	0.574545	0.97697	0.030303	0.253333	0.521212	0.755152	0.996364	0.390303	0.300971	0.042424	0.214545	0.379394	0.552727	0.996364	0.397576
0.349057	0.292453	0.358491	0.208531	0.265403	0.175355	0.009434	0.259434	0.490566	0.698113	0.990566	0.075472	0.254717	0.419811	0.712264	1	0.004717	0.193396	0.599057	0.79717	0.995283	0.533019	0.150943	0.316038	0.075829	0.066351	0	0.004717	0.278302	0.410377	0.650943	1	0.018868	0.051887	0.599057	0.75	0.938679	0.117925	0.216981	0.570755	0.806604	0.995283	0.514151	0.388626	0.014151	0.325472	0.533019	0.754717	0.995283	0.320755
0.370455	0.304545	0.325	0.218679	0.225513	0.191344	0.004545	0.243182	0.556818	0.8	1	0.009091	0.272727	0.518182	0.763636	0.997727	0.002273	0.231818	0.438636	0.647727	0.977273	0.525	0.236364	0.238636	0.093394	0.056948	0.002278	0.002273	0.256818	0.547727	0.793182	1	0.077273	0.179545	0.443182	0.677273	0.945455	0.009091	0.243182	0.554545	0.613636	0.993182	0.504545	0.323462	0.011364	0.256818	0.447727	0.715909	0.936364	0.361364
0.357827	0.359425	0.282748	0.2416	0.2176	0.1936	0.004792	0.204473	0.448882	0.720447	1	0.003195	0.21246	0.535144	0.765176	0.995208	0.001597	0.338658	0.539936	0.755591	0.998403	0.507987	0.159744	0.332268	0.0592	0.0752	0.0016	0.001597	0.13738	0.436102	0.670927	1	0.094249	0.246006	0.472843	0.803514	0.86901	0.047923	0.383387	0.619808	0.753994	0.996805	0.48722	0.4128	0.01278	0.27476	0.528754	0.782748	0.996805	0.394569
0.290934	0.384303	0.324763	0.210027	0.185637	0.242547	0.008119	0.286874	0.535859	0.742896	0.994587	0.002706	0.236806	0.499323	0.746955	0.997294	0.001353	0.219215	0.461434	0.753721	1	0.462788	0.253045	0.284168	0.097561	0.054201	0	0.001353	0.236806	0.50203	0.691475	1	0.005413	0.231394	0.564276	0.818674	0.97023	0.087957	0.296346	0.396482	0.7023	0.99594	0.543978	0.384824	0.006766	0.219215	0.44249	0.728011	0.99594	0.400541
0.446429	0.196429	0.357143	0.153153	0.306306	0.171171	0.017857	0.1875	0.535714	0.821429	1	0.044643	0.276786	0.401786	0.625	0.955357	0.008929	0.223214	0.464286	0.714286	0.991071	0.294643	0.232143	0.473214	0.09009	0.072072	0	0.008929	0.1875	0.401786	0.678571	1	0.035714	0.196429	0.276786	0.366071	0.723214	0.098214	0.446429	0.5625	0.839286	0.964286	0.428571	0.396396	0.044643	0.276786	0.464286	0.705357	0.928571	0.160714
0.360902	0.323308	0.315789	0.272727	0.227273	0.174242	0.037594	0.285714	0.466165	0.706767	0.984962	0.015038	0.180451	0.526316	0.774436	1	0.007519	0.240602	0.481203	0.766917	0.992481	0.368421	0.345865	0.285714	0.143939	0.05303	0.007576	0.007519	0.338346	0.556391	0.721805	1	0.180451	0.383459	0.586466	0.81203	0.992481	0.030075	0.090226	0.24812	0.315789	0.917293	0.458647	0.439394	0.037594	0.240602	0.503759	0.789474	0.992481	0.338346
0.408	0.344	0.248	0.290323	0.241935	0.177419	0.016	0.216	0.44	0.728	0.984	0.048	0.296	0.552	0.76	0.992	0.008	0.136	0.368	0.616	1	0.464	0.536	0	0.193548	0	0	0.008	0.272	0.528	0.76	1	0.04	0.224	0.488	0.712	0.992	0	0	0	0	0	0.416	0.322581	0.048	0.248	0.496	0.616	0.944	0.336
0.34058	0.362319	0.297101	0.243194	0.210526	0.219601	0.005435	0.255435	0.536232	0.797101	0.996377	0.003623	0.28442	0.528986	0.778986	1	0.001812	0.184783	0.427536	0.630435	0.992754	0.467391	0.063406	0.469203	0.019964	0.07804	0.005445	0.001812	0.26087	0.641304	0.824275	1	0.056159	0.068841	0.186594	0.373188	0.615942	0.005435	0.29529	0.461957	0.652174	0.994565	0.496377	0.315789	0.007246	0.217391	0.45471	0.625	0.992754	0.418478
0.39708	0.313869	0.289051	0.255848	0.21345	0.185673	0.007299	0.213139	0.515328	0.785401	1	0.011679	0.233577	0.461314	0.725547	0.99562	0.00146	0.294891	0.512409	0.705109	0.99708	0.513869	0.128467	0.357664	0.05117	0.059942	0.00731	0.00146	0.154745	0.470073	0.865693	1	0.00438	0.359124	0.519708	0.672993	0.90073	0.013139	0.328467	0.559124	0.759124	0.858394	0.486131	0.342105	0.00438	0.280292	0.472993	0.69635	0.99708	0.340146
0.423729	0.262712	0.313559	0.196581	0.316239	0.196581	0.016949	0.211864	0.516949	0.720339	0.991525	0.042373	0.245763	0.457627	0.754237	0.974576	0.008475	0.237288	0.449153	0.745763	1	0.338983	0.220339	0.440678	0.08547	0.068376	0	0.008475	0.220339	0.533898	0.805085	1	0.228814	0.271186	0.355932	0.440678	0.847458	0.033898	0.135593	0.601695	0.711864	0.957627	0.423729	0.25641	0.127119	0.322034	0.474576	0.788136	0.983051	0.29661
0.357977	0.459144	0.182879	0.332031	0.175781	0.140625	0.011673	0.225681	0.521401	0.762646	0.992218	0.007782	0.241245	0.494163	0.774319	1	0.003891	0.322957	0.474708	0.66537	0.988327	0.719844	0.101167	0.178988	0.03125	0.03125	0	0.003891	0.22179	0.400778	0.762646	1	0.416342	0.513619	0.540856	0.595331	0.708171	0.035019	0.07393	0.610895	0.937743	0.984436	0.361868	0.335938	0.019455	0.272374	0.490272	0.684825	0.988327	0.501946
0.357419	0.345806	0.296774	0.237573	0.222079	0.198192	0.002581	0.251613	0.507097	0.745806	0.999355	0.00129	0.241935	0.459355	0.740645	1	0.000645	0.265806	0.530968	0.766452	0.996774	0.46	0.176774	0.363226	0.090381	0.069722	0.005165	0.000645	0.269677	0.46	0.734194	1	0.003226	0.375484	0.6	0.736129	0.963226	0.006452	0.169677	0.502581	0.763871	0.992903	0.474839	0.415752	0.003226	0.266452	0.516774	0.766452	0.996774	0.356129
0.42542	0.383403	0.191176	0.304942	0.171399	0.117771	0.003151	0.257353	0.490546	0.727941	1	0.002101	0.189076	0.442227	0.726891	0.995798	0.00105	0.387605	0.644958	0.790966	0.992647	0.744748	0.005252	0.25	0.004206	0.052576	0	0.00105	0.203782	0.391807	0.598739	1	0.084034	0.084034	0.085084	0.504202	0.506303	0.012605	0.656513	0.752101	0.828782	0.991597	0.281513	0.271293	0.039916	0.481092	0.671218	0.82563	0.992647	0.401261
0.361233	0.374449	0.264317	0.286976	0.183223	0.181015	0.008811	0.312775	0.537445	0.797357	1	0.004405	0.202643	0.559471	0.779736	0.997797	0.002203	0.237885	0.389868	0.640969	0.951542	0.493392	0.160793	0.345815	0.06181	0.07064	0.004415	0.002203	0.314978	0.645374	0.876652	1	0.090308	0.286344	0.486784	0.656388	0.768722	0.006608	0.19163	0.376652	0.588106	0.854626	0.508811	0.317881	0.006608	0.200441	0.398678	0.640969	0.852423	0.387665
0.357441	0.336579	0.305981	0.207521	0.228412	0.221448	0.004172	0.250348	0.553547	0.84701	1	0.002782	0.264256	0.45758	0.698192	0.997218	0.001391	0.226704	0.49096	0.724618	0.993046	0.485396	0.32267	0.191933	0.125348	0.033426	0.005571	0.001391	0.216968	0.433936	0.67733	1	0.005563	0.357441	0.543811	0.685675	0.988873	0.009736	0.166898	0.860918	0.909597	0.995828	0.50765	0.401114	0.006954	0.268428	0.488178	0.724618	0.990264	0.360223
0.451505	0.337793	0.210702	0.278523	0.194631	0.157718	0.006689	0.274247	0.565217	0.755853	1	0.013378	0.267559	0.458194	0.719064	0.996656	0.003344	0.16388	0.337793	0.829431	0.986622	0.618729	0.207358	0.173913	0.080537	0.053691	0.006711	0.003344	0.280936	0.518395	0.688963	1	0.060201	0.150502	0.26087	0.354515	0.889632	0.056856	0.668896	0.849498	0.946488	0.989967	0.331104	0.281879	0.013378	0.16388	0.297659	0.48495	0.986622	0.411371
0.266541	0.429112	0.304348	0.179924	0.176136	0.285985	0.017013	0.362949	0.553875	0.814745	0.99811	0.003781	0.155009	0.398866	0.697543	0.996219	0.00189	0.289225	0.514178	0.725898	1	0.627599	0.204159	0.168242	0.079545	0.034091	0	0.00189	0.166352	0.431002	0.729679	1	0.056711	0.345936	0.523629	0.741021	0.94896	0.241966	0.413989	0.640832	0.763705	0.886578	0.483932	0.337121	0.022684	0.192817	0.444234	0.705104	0.990548	0.425331
0.361905	0.342857	0.295238	0.240385	0.307692	0.182692	0.028571	0.209524	0.542857	0.72381	1	0.019048	0.257143	0.4	0.733333	0.990476	0.009524	0.219048	0.47619	0.780952	0.961905	0.380952	0.27619	0.342857	0.086538	0.048077	0.009615	0.009524	0.361905	0.533333	0.838095	1	0.028571	0.085714	0.438095	0.685714	0.961905	0.12381	0.2	0.571429	0.657143	0.819048	0.419048	0.519231	0.038095	0.257143	0.495238	0.695238	0.952381	0.352381
0.291762	0.429062	0.279176	0.262314	0.167239	0.239404	0.005721	0.24714	0.528604	0.772311	1	0.002288	0.273455	0.491991	0.749428	0.997712	0.001144	0.226545	0.482838	0.696796	0.998856	0.575515	0.114416	0.310069	0.04811	0.064147	0.004582	0.001144	0.265446	0.52746	0.757437	1	0.004577	0.138444	0.41762	0.59611	0.966819	0.049199	0.215103	0.5	0.726545	0.997712	0.456522	0.318442	0.004577	0.243707	0.5	0.718535	0.998856	0.467963
0.338235	0.448529	0.213235	0.237037	0.17037	0.118519	0.036765	0.25	0.470588	0.676471	1	0.044118	0.323529	0.654412	0.875	0.992647	0.007353	0.095588	0.294118	0.514706	0.691176	0.323529	0.161765	0.514706	0.059259	0.088889	0	0.007353	0.25	0.330882	0.463235	1	0.014706	0.205882	0.411765	0.477941	0.522059	0.051471	0.544118	0.676471	0.852941	0.992647	0.316176	0.281481	0.022059	0.176471	0.411765	0.588235	0.963235	0.477941
0.336538	0.331731	0.331731	0.2657	0.251208	0.217391	0.014423	0.230769	0.552885	0.778846	1	0.009615	0.221154	0.466346	0.745192	0.995192	0.004808	0.254808	0.480769	0.697115	0.947115	0.427885	0.384615	0.1875	0.130435	0.05314	0.004831	0.004808	0.274038	0.581731	0.793269	1	0.014423	0.298077	0.447115	0.629808	0.879808	0.081731	0.221154	0.567308	0.9375	0.985577	0.418269	0.444444	0.019231	0.240385	0.451923	0.677885	0.884615	0.360577
0.279236	0.389021	0.331742	0.203349	0.19378	0.222488	0.026253	0.324582	0.515513	0.799523	0.99284	0.004773	0.164678	0.463007	0.711217	0.995227	0.002387	0.272076	0.522673	0.74463	1	0.48926	0.147971	0.362768	0.055024	0.083732	0.011962	0.002387	0.236277	0.527446	0.756563	1	0.023866	0.097852	0.26253	0.460621	0.961814	0.038186	0.317422	0.548926	0.794749	0.995227	0.587112	0.37799	0.01432	0.26969	0.477327	0.725537	0.995227	0.396181
0.312253	0.375494	0.312253	0.253968	0.190476	0.234127	0.01581	0.213439	0.426877	0.731225	0.956522	0.007905	0.3083	0.549407	0.810277	1	0.003953	0.229249	0.482213	0.695652	0.988142	0.442688	0.189723	0.367589	0.063492	0.063492	0	0.003953	0.367589	0.754941	0.885375	1	0.142292	0.201581	0.355731	0.719368	0.833992	0.01581	0.110672	0.407115	0.501976	0.889328	0.41502	0.388889	0.019763	0.225296	0.442688	0.648221	0.972332	0.387352
0.316731	0.372925	0.310345	0.21867	0.212276	0.236573	0.006386	0.293742	0.49553	0.766284	1	0.002554	0.229885	0.517241	0.756066	0.998723	0.001277	0.234994	0.480204	0.727969	0.989783	0.421456	0.254151	0.324393	0.076726	0.058824	0.005115	0.001277	0.190294	0.512133	0.720307	1	0.010217	0.199234	0.598978	0.828863	0.992337	0.034483	0.323116	0.430396	0.733078	0.971903	0.590038	0.355499	0.003831	0.218391	0.485313	0.688378	0.983397	0.403576
0.352941	0.333333	0.313725	0.230263	0.256579	0.243421	0.013072	0.254902	0.496732	0.751634	0.986928	0.03268	0.169935	0.339869	0.627451	0.993464	0.006536	0.359477	0.588235	0.79085	1	0.640523	0.176471	0.183007	0.052632	0.052632	0.013158	0.006536	0.169935	0.333333	0.575163	1	0.117647	0.503268	0.764706	0.810458	0.96732	0.019608	0.529412	0.633987	0.856209	0.901961	0.392157	0.394737	0.019608	0.267974	0.431373	0.718954	0.954248	0.339869
0.295302	0.422819	0.281879	0.277027	0.168919	0.256757	0.073826	0.422819	0.590604	0.738255	0.986577	0.020134	0.161074	0.409396	0.758389	1	0.006711	0.234899	0.442953	0.697987	0.959732	0.61745	0.288591	0.09396	0.060811	0.02027	0.006757	0.006711	0.214765	0.510067	0.771812	1	0.33557	0.395973	0.503356	0.691275	0.818792	0.040268	0.053691	0.080537	0.825503	0.852349	0.33557	0.472973	0.040268	0.268456	0.456376	0.684564	0.926174	0.422819
0.419492	0.266949	0.313559	0.242553	0.225532	0.178723	0.008475	0.228814	0.504237	0.745763	0.995763	0.072034	0.245763	0.495763	0.771186	1	0.004237	0.237288	0.466102	0.720339	0.970339	0.34322	0.09322	0.563559	0.025532	0.093617	0	0.004237	0.169492	0.474576	0.758475	1	0.444915	0.779661	0.834746	0.855932	0.881356	0.012712	0.233051	0.411017	0.648305	0.978814	0.512712	0.374468	0.025424	0.233051	0.444915	0.644068	0.970339	0.271186
0.384615	0.318681	0.296703	0.222222	0.222222	0.211111	0.021978	0.230769	0.461538	0.758242	0.967033	0.043956	0.197802	0.384615	0.637363	1	0.010989	0.241758	0.527473	0.835165	0.978022	0.32967	0.351648	0.318681	0.1	0.055556	0.011111	0.010989	0.32967	0.527473	0.692308	1	0.032967	0.10989	0.494505	0.659341	0.967033	0.153846	0.21978	0.296703	0.769231	0.901099	0.461538	0.444444	0.043956	0.197802	0.527473	0.747253	0.978022	0.263736
0.422509	0.315498	0.261993	0.297597	0.179298	0.190388	0.005535	0.191882	0.433579	0.739852	0.998155	0.00369	0.258303	0.49262	0.730627	0.99631	0.001845	0.359779	0.568266	0.761993	1	0.592251	0.226937	0.180812	0.103512	0.05915	0.003697	0.001845	0.201107	0.442804	0.774908	1	0.009225	0.383764	0.601476	0.763838	0.994465	0.04059	0.350554	0.501845	0.660517	0.98893	0.359779	0.32902	0.01107	0.400369	0.595941	0.782288	0.990775	0.376384
0.362245	0.306122	0.331633	0.202046	0.263427	0.209719	0.010204	0.247449	0.528061	0.752551	0.994898	0.005102	0.229592	0.454082	0.714286	1	0.002551	0.267857	0.497449	0.755102	0.987245	0.387755	0.186224	0.42602	0.076726	0.081841	0	0.002551	0.280612	0.553571	0.77551	1	0.09949	0.262755	0.566327	0.798469	0.933673	0.007653	0.206633	0.466837	0.719388	0.987245	0.563776	0.393862	0.007653	0.27551	0.482143	0.729592	0.987245	0.27551
0.384106	0.337748	0.278146	0.246667	0.226667	0.193333	0.02649	0.192053	0.443709	0.649007	1	0.019868	0.225166	0.556291	0.81457	0.986755	0.006623	0.284768	0.569536	0.735099	0.993377	0.496689	0.165563	0.337748	0.093333	0.08	0	0.006623	0.278146	0.615894	0.860927	1	0.019868	0.543046	0.655629	0.715232	0.980132	0.059603	0.13245	0.331126	0.450331	0.774834	0.470199	0.36	0.059603	0.357616	0.596026	0.748344	0.980132	0.278146
0.313433	0.447761	0.238806	0.227273	0.212121	0.19697	0.029851	0.343284	0.507463	0.850746	1	0.044776	0.19403	0.402985	0.686567	0.985075	0.014925	0.238806	0.462687	0.58209	0.910448	0.522388	0.343284	0.134328	0.151515	0.030303	0	0.014925	0.119403	0.402985	0.626866	1	0.164179	0.223881	0.447761	0.641791	0.776119	0.850746	0.865672	0.895522	0.925373	0.970149	0.402985	0.484848	0.074627	0.238806	0.522388	0.641791	0.970149	0.447761
0.324251	0.337875	0.337875	0.191257	0.256831	0.245902	0.029973	0.223433	0.520436	0.790191	0.997275	0.00545	0.258856	0.463215	0.705722	0.972752	0.002725	0.253406	0.506812	0.735695	1	0.452316	0.185286	0.362398	0.090164	0.101093	0.008197	0.002725	0.253406	0.498638	0.683924	1	0.046322	0.160763	0.376022	0.583106	0.929155	0.013624	0.286104	0.613079	0.814714	0.99455	0.555858	0.442623	0.016349	0.237057	0.512262	0.743869	0.99455	0.365123
0.364789	0.370423	0.264789	0.248237	0.197461	0.211566	0.002817	0.215493	0.502817	0.757746	0.998592	0.005634	0.28169	0.504225	0.752113	0.997183	0.001408	0.253521	0.456338	0.694366	1	0.54507	0.207042	0.247887	0.084626	0.059238	0.002821	0.001408	0.201408	0.484507	0.760563	1	0.025352	0.287324	0.440845	0.646479	0.997183	0.042254	0.356338	0.566197	0.743662	0.95493	0.44507	0.344147	0.011268	0.257746	0.457746	0.738028	0.995775	0.384507
0.298969	0.357388	0.343643	0.213793	0.22069	0.241379	0.006873	0.268041	0.542955	0.783505	0.996564	0.017182	0.230241	0.47079	0.707904	0.993127	0.003436	0.243986	0.484536	0.725086	1	0.388316	0.168385	0.443299	0.048276	0.110345	0	0.003436	0.19244	0.450172	0.694158	1	0.168385	0.323024	0.439863	0.639175	0.728522	0.020619	0.230241	0.52921	0.824742	0.986254	0.546392	0.406897	0.010309	0.243986	0.477663	0.676976	0.982818	0.347079
0.43662	0.309859	0.253521	0.185714	0.257143	0.185714	0.028169	0.28169	0.492958	0.859155	1	0.084507	0.15493	0.535211	0.647887	0.915493	0.014085	0.197183	0.450704	0.56338	0.901408	0.478873	0.338028	0.183099	0.142857	0.028571	0	0.014085	0.112676	0.422535	0.633803	1	0.140845	0.211268	0.352113	0.492958	0.71831	0.788732	0.816901	0.859155	0.901408	0.957746	0.408451	0.428571	0.070423	0.239437	0.507042	0.619718	0.901408	0.338028
0.412596	0.25964	0.327763	0.217503	0.256113	0.162162	0.005141	0.294344	0.524422	0.744216	0.998715	0.006427	0.191517	0.48329	0.732648	1	0.001285	0.230077	0.460154	0.757069	0.992288	0.356041	0.131105	0.512853	0.047619	0.091377	0.003861	0.001285	0.233933	0.525707	0.745501	1	0.039846	0.170951	0.489717	0.742931	0.90617	0.020566	0.294344	0.471722	0.750643	0.992288	0.521851	0.388674	0.003856	0.194087	0.458869	0.742931	0.997429	0.268638
0.368715	0.340782	0.290503	0.247191	0.207865	0.202247	0.011173	0.24581	0.458101	0.748603	1	0.072626	0.307263	0.486034	0.765363	0.994413	0.005587	0.173184	0.502793	0.72067	0.98324	0.402235	0.256983	0.340782	0.106742	0.073034	0.005618	0.005587	0.184358	0.603352	0.899441	1	0.011173	0.201117	0.50838	0.726257	0.810056	0.050279	0.27933	0.363128	0.564246	0.888268	0.351955	0.438202	0.01676	0.173184	0.497207	0.687151	0.972067	0.340782
0.279245	0.366038	0.354717	0.200758	0.231061	0.238636	0.026415	0.271698	0.464151	0.773585	0.996226	0.007547	0.181132	0.498113	0.720755	0.984906	0.003774	0.283019	0.520755	0.724528	1	0.418868	0.29434	0.286792	0.087121	0.041667	0.003788	0.003774	0.207547	0.50566	0.690566	1	0.124528	0.222642	0.460377	0.713208	0.856604	0.018868	0.362264	0.539623	0.920755	0.992453	0.566038	0.386364	0.011321	0.267925	0.509434	0.728302	0.988679	0.388679
0.411765	0.235294	0.352941	0.223881	0.283582	0.104478	0.044118	0.294118	0.588235	0.808824	0.985294	0.029412	0.25	0.411765	0.705882	0.970588	0.014706	0.191176	0.441176	0.617647	1	0.485294	0.161765	0.352941	0.149254	0.059701	0	0.014706	0.147059	0.279412	0.661765	1	0.058824	0.088235	0.308824	0.426471	0.470588	0.514706	0.588235	0.735294	0.823529	0.911765	0.323529	0.447761	0.058824	0.205882	0.426471	0.602941	0.838235	0.338235
0.368421	0.355263	0.276316	0.306667	0.213333	0.146667	0.026316	0.210526	0.486842	0.763158	1	0.052632	0.328947	0.539474	0.776316	0.947368	0.013158	0.144737	0.315789	0.592105	0.921053	0.447368	0.552632	0	0.186667	0	0	0.013158	0.105263	0.394737	0.657895	1	0.118421	0.289474	0.565789	0.75	0.947368	0	0	0	0	0	0.539474	0.426667	0.092105	0.276316	0.5	0.697368	0.921053	0.368421
0.361905	0.257143	0.380952	0.153846	0.269231	0.144231	0.057143	0.180952	0.533333	0.780952	0.971429	0.019048	0.285714	0.485714	0.67619	1	0.009524	0.209524	0.47619	0.704762	0.990476	0.438095	0.561905	0	0.173077	0	0	0.009524	0.27619	0.533333	0.790476	1	0.019048	0.190476	0.409524	0.704762	0.980952	0	0	0	0	0	0.390476	0.519231	0.019048	0.209524	0.457143	0.704762	0.980952	0.257143
0.38121	0.368251	0.25054	0.259459	0.180541	0.175135	0.00324	0.273218	0.548596	0.780778	1	0.00216	0.240821	0.519438	0.766739	0.99892	0.00108	0.242981	0.429806	0.645788	0.967603	0.509719	0.115551	0.37473	0.04973	0.088649	0.006486	0.00108	0.181425	0.555076	0.794816	1	0.008639	0.268898	0.37473	0.518359	0.862851	0.007559	0.285097	0.488121	0.704104	0.984881	0.407127	0.330811	0.006479	0.240821	0.414687	0.595032	0.993521	0.403888
0.377049	0.306011	0.31694	0.214286	0.241758	0.236264	0.010929	0.229508	0.459016	0.775956	1	0.060109	0.256831	0.513661	0.748634	0.961749	0.005464	0.213115	0.480874	0.68306	0.978142	0.47541	0.284153	0.240437	0.098901	0.032967	0	0.005464	0.349727	0.513661	0.797814	1	0.021858	0.360656	0.579235	0.89071	0.983607	0.054645	0.10929	0.256831	0.617486	0.677596	0.513661	0.373626	0.038251	0.240437	0.519126	0.693989	0.978142	0.349727
0.438326	0.356828	0.204846	0.324503	0.183223	0.134658	0.006608	0.185022	0.453744	0.720264	0.997797	0.004405	0.251101	0.45815	0.737885	0.993392	0.002203	0.414097	0.610132	0.810573	1	0.464758	0.218062	0.317181	0.081678	0.081678	0.002208	0.002203	0.207048	0.440529	0.740088	1	0.048458	0.286344	0.513216	0.73348	0.991189	0.008811	0.253304	0.537445	0.757709	0.993392	0.433921	0.322296	0.008811	0.244493	0.484581	0.73348	0.993392	0.400881
0.456522	0.304348	0.23913	0.252747	0.197802	0.142857	0.032609	0.26087	0.641304	0.858696	1	0.021739	0.23913	0.521739	0.706522	0.934783	0.01087	0.184783	0.380435	0.5	0.793478	0.630435	0.25	0.119565	0.10989	0.043956	0	0.01087	0.217391	0.5	0.815217	1	0.141304	0.184783	0.304348	0.423913	0.597826	0.641304	0.652174	0.684783	0.717391	0.836957	0.347826	0.351648	0.065217	0.206522	0.434783	0.532609	0.728261	0.369565
0.300173	0.473183	0.226644	0.231169	0.137662	0.227706	0.004325	0.345156	0.58737	0.799308	0.999135	0.00173	0.207612	0.372837	0.643599	0.991349	0.000865	0.360727	0.634948	0.803633	1	0.758651	0.08045	0.1609	0.029437	0.036364	0.001732	0.000865	0.200692	0.390138	0.579585	1	0.009516	0.705882	0.801038	0.872837	0.958478	0.079585	0.687716	0.787197	0.897924	0.987889	0.675606	0.245887	0.002595	0.219723	0.393599	0.690311	0.985294	0.525087
0.389091	0.4	0.210909	0.306569	0.160584	0.178832	0.007273	0.269091	0.516364	0.752727	0.996364	0.018182	0.250909	0.505455	0.781818	1	0.003636	0.207273	0.450909	0.614545	0.934545	0.494545	0.072727	0.432727	0.043796	0.072993	0	0.003636	0.163636	0.421818	0.810909	1	0.010909	0.083636	0.178182	0.276364	0.418182	0.12	0.429091	0.6	0.709091	0.930909	0.298182	0.306569	0.010909	0.254545	0.512727	0.647273	0.963636	0.385455
0.432432	0.256757	0.310811	0.191781	0.246575	0.150685	0.040541	0.27027	0.554054	0.72973	0.945946	0.027027	0.148649	0.391892	0.837838	1	0.013514	0.175676	0.472973	0.608108	0.851351	0.351351	0.27027	0.378378	0.082192	0.054795	0	0.013514	0.27027	0.716216	0.905405	1	0.310811	0.608108	0.675676	0.810811	0.878378	0.067568	0.148649	0.243243	0.459459	0.554054	0.418919	0.356164	0.054054	0.162162	0.418919	0.608108	0.878378	0.27027
0.311828	0.365591	0.322581	0.23913	0.184783	0.195652	0.043011	0.16129	0.451613	0.774194	1	0.021505	0.268817	0.645161	0.817204	0.978495	0.010753	0.258065	0.408602	0.602151	0.892473	0.505376	0.333333	0.16129	0.108696	0.043478	0.021739	0.010753	0.247312	0.731183	0.870968	1	0.258065	0.365591	0.483871	0.591398	0.774194	0.032258	0.107527	0.150538	0.193548	0.655914	0.451613	0.304348	0.096774	0.290323	0.451613	0.634409	0.903226	0.387097
0.324841	0.469214	0.205945	0.234043	0.134043	0.174468	0.006369	0.218684	0.41189	0.647558	1	0.012739	0.397028	0.636943	0.823779	0.995754	0.002123	0.133758	0.318471	0.564756	0.974522	0.683652	0.144374	0.171975	0.061702	0.048936	0.002128	0.002123	0.36518	0.622081	0.815287	1	0.070064	0.159236	0.269639	0.360934	0.974522	0.04034	0.178344	0.309979	0.456476	0.794055	0.484076	0.323404	0.065817	0.326964	0.539278	0.683652	0.976645	0.454352
0.413223	0.280992	0.305785	0.175	0.258333	0.175	0.016529	0.305785	0.520661	0.77686	0.966942	0.033058	0.181818	0.38843	0.743802	0.991736	0.008264	0.231405	0.495868	0.702479	1	0.404959	0.157025	0.438017	0.05	0.1	0	0.008264	0.181818	0.338843	0.735537	1	0.256198	0.280992	0.380165	0.421488	0.727273	0.07438	0.471074	0.578512	0.826446	0.942149	0.454545	0.35	0.041322	0.305785	0.512397	0.702479	0.92562	0.256198
0.361345	0.243697	0.394958	0.186441	0.313559	0.220339	0.016807	0.159664	0.453782	0.613445	1	0.058824	0.327731	0.470588	0.789916	0.991597	0.008403	0.243697	0.521008	0.731092	0.966387	0.319328	0.394958	0.285714	0.118644	0.050847	0.016949	0.008403	0.159664	0.327731	0.764706	1	0.05042	0.193277	0.352941	0.714286	0.932773	0.462185	0.521008	0.596639	0.815126	0.89916	0.588235	0.372881	0.05042	0.285714	0.579832	0.764706	0.966387	0.218487
0.472727	0.218182	0.309091	0.211009	0.366972	0.119266	0.018182	0.281818	0.545455	0.790909	1	0.027273	0.109091	0.372727	0.581818	0.990909	0.009091	0.263636	0.527273	0.763636	0.954545	0.381818	0.290909	0.327273	0.110092	0.055046	0.018349	0.009091	0.190909	0.536364	0.809091	1	0.036364	0.118182	0.418182	0.609091	0.9	0.2	0.272727	0.527273	0.763636	0.872727	0.463636	0.422018	0.036364	0.181818	0.490909	0.709091	0.909091	0.190909
0.257426	0.445545	0.29703	0.18543	0.188742	0.251656	0.013201	0.29703	0.50495	0.815182	1	0.006601	0.20132	0.465347	0.722772	0.9967	0.0033	0.267327	0.524752	0.716172	0.990099	0.442244	0.171617	0.386139	0.05298	0.086093	0	0.0033	0.148515	0.425743	0.712871	1	0.026403	0.339934	0.481848	0.676568	0.762376	0.115512	0.306931	0.570957	0.848185	0.993399	0.521452	0.423841	0.023102	0.287129	0.50495	0.686469	0.986799	0.471947
0.363529	0.375294	0.261176	0.270907	0.175501	0.204947	0.004706	0.238824	0.417647	0.716471	1	0.002353	0.228235	0.475294	0.732941	0.998824	0.001176	0.331765	0.603529	0.771765	0.996471	0.563529	0.123529	0.312941	0.04947	0.061249	0.002356	0.001176	0.210588	0.351765	0.598824	1	0.009412	0.498824	0.637647	0.758824	0.875294	0.021176	0.485882	0.66	0.884706	0.987059	0.487059	0.374558	0.005882	0.277647	0.556471	0.76	0.996471	0.423529
0.327125	0.37369	0.299185	0.216783	0.216783	0.201632	0.003492	0.288708	0.537835	0.76135	0.995343	0.006985	0.19092	0.521537	0.777648	1	0.001164	0.285215	0.461001	0.648428	0.998836	0.59837	0.017462	0.384168	0.01049	0.064103	0.001166	0.001164	0.152503	0.580908	0.83702	1	0.250291	0.252619	0.431898	0.778813	0.9383	0.096624	0.351572	0.488941	0.610012	0.859139	0.57858	0.428904	0.002328	0.195576	0.434226	0.67404	0.998836	0.370198
0.348765	0.354938	0.296296	0.225657	0.213292	0.208655	0.013889	0.268519	0.516975	0.794753	0.996914	0.003086	0.179012	0.447531	0.722222	1	0.001543	0.299383	0.537037	0.740741	0.998457	0.50463	0.166667	0.328704	0.068006	0.071097	0.006182	0.001543	0.16821	0.344136	0.649691	1	0.018519	0.353395	0.609568	0.760802	0.912037	0.050926	0.41821	0.583333	0.810185	0.976852	0.513889	0.374034	0.010802	0.32716	0.537037	0.746914	0.998457	0.376543
0.408805	0.27044	0.320755	0.227848	0.227848	0.189873	0.018868	0.201258	0.427673	0.72327	0.987421	0.012579	0.339623	0.534591	0.773585	0.981132	0.006289	0.194969	0.45283	0.660377	1	0.339623	0.08805	0.572327	0.037975	0.088608	0	0.006289	0.081761	0.427673	0.710692	1	0.45283	0.465409	0.490566	0.528302	0.566038	0.132075	0.283019	0.603774	0.792453	0.981132	0.459119	0.443038	0.044025	0.264151	0.534591	0.742138	0.981132	0.264151
0.374384	0.310345	0.315271	0.2357	0.247535	0.206114	0.004926	0.202956	0.439409	0.743842	0.99803	0.00197	0.234483	0.528079	0.745813	0.993103	0.000985	0.320197	0.538916	0.759606	1	0.470936	0.110345	0.418719	0.043393	0.092702	0.003945	0.000985	0.151724	0.433498	0.771429	1	0.008867	0.525123	0.611823	0.93399	0.994089	0.003941	0.298522	0.482759	0.707389	0.99803	0.430542	0.386588	0.003941	0.357635	0.551724	0.738916	0.996059	0.358621
0.36833	0.309811	0.321859	0.187931	0.239655	0.213793	0.003442	0.228916	0.483649	0.741824	0.998279	0.013769	0.246127	0.433735	0.774527	1	0.001721	0.261618	0.531842	0.752151	0.991394	0.44062	0.015491	0.54389	0.012069	0.105172	0.001724	0.001721	0.215146	0.327022	0.54389	1	0.024096	0.158348	0.16179	0.234079	0.450947	0.041308	0.461274	0.640275	0.814114	0.996558	0.535284	0.427586	0.015491	0.297762	0.535284	0.75043	0.991394	0.318417
0.365957	0.310638	0.323404	0.25641	0.24359	0.188034	0.017021	0.246809	0.493617	0.719149	1	0.008511	0.161702	0.52766	0.761702	0.995745	0.004255	0.276596	0.485106	0.73617	0.991489	0.489362	0.374468	0.13617	0.145299	0.042735	0	0.004255	0.148936	0.53617	0.770213	1	0.089362	0.417021	0.595745	0.795745	0.970213	0.017021	0.165957	0.2	0.242553	0.485106	0.523404	0.376068	0.012766	0.255319	0.510638	0.744681	0.991489	0.32766
0.366925	0.421189	0.211886	0.264249	0.129534	0.173575	0.020672	0.310078	0.434109	0.723514	0.989664	0.007752	0.178295	0.472868	0.687339	1	0.002584	0.242894	0.630491	0.819121	0.992248	0.635659	0.118863	0.245478	0.041451	0.041451	0	0.002584	0.165375	0.447028	0.651163	1	0.124031	0.630491	0.739018	0.863049	0.94832	0.25323	0.333333	0.563307	0.777778	0.96124	0.364341	0.316062	0.007752	0.263566	0.565891	0.751938	0.992248	0.44186
0.368564	0.317073	0.314363	0.222343	0.241866	0.204989	0.001626	0.268293	0.523035	0.736585	0.996206	0.003252	0.267751	0.507859	0.754472	0.999458	0.000542	0.211924	0.461247	0.755556	1	0.511111	0.102981	0.385908	0.045553	0.075922	0.003254	0.000542	0.333333	0.559892	0.762602	1	0.001084	0.124661	0.370732	0.539295	0.980488	0.007588	0.182114	0.463415	0.814092	0.995122	0.523035	0.367679	0.002168	0.239566	0.481843	0.755556	0.998374	0.345257
0.380952	0.342857	0.27619	0.230769	0.269231	0.182692	0.095238	0.27619	0.504762	0.72381	0.971429	0.047619	0.333333	0.590476	0.819048	1	0.009524	0.114286	0.314286	0.628571	0.952381	0.228571	0	0.771429	0	0.076923	0	0.009524	0.057143	0.561905	0.809524	1	0	0	0	0	0	0.07619	0.285714	0.47619	0.695238	0.961905	0.333333	0.461538	0.028571	0.142857	0.466667	0.714286	0.952381	0.32381
0.330544	0.401674	0.267782	0.268908	0.205882	0.193277	0.012552	0.225941	0.506276	0.769874	1	0.008368	0.242678	0.543933	0.757322	0.995816	0.004184	0.251046	0.430962	0.623431	0.970711	0.322176	0.09205	0.585774	0.042017	0.109244	0	0.004184	0.175732	0.472803	0.790795	1	0.435146	0.76569	0.824268	0.853556	0.979079	0.029289	0.242678	0.447699	0.610879	0.953975	0.485356	0.352941	0.050209	0.242678	0.439331	0.65272	0.970711	0.426778
0.271363	0.517939	0.210698	0.213446	0.106397	0.203003	0.001305	0.251794	0.478147	0.761252	0.998043	0.003262	0.223744	0.480757	0.690802	0.997391	0.000652	0.304631	0.581213	0.811481	1	0.560339	0.048271	0.391389	0.031984	0.069843	0.001958	0.000652	0.227658	0.40574	0.660144	1	0.014351	0.282453	0.531637	0.947815	0.998695	0.020874	0.393346	0.617091	0.804305	0.947162	0.630789	0.278068	0.001957	0.22244	0.493803	0.73516	0.998695	0.502283
0.356917	0.427666	0.215417	0.27907	0.150106	0.174419	0.002112	0.192186	0.472017	0.731785	0.998944	0.006336	0.270327	0.589229	0.797254	1	0.001056	0.275607	0.43717	0.599789	0.997888	0.644139	0.105597	0.250264	0.039112	0.053911	0.003171	0.001056	0.210137	0.618796	0.829989	1	0.020063	0.372756	0.481521	0.582893	0.965153	0.040127	0.277719	0.407603	0.560718	0.800422	0.475185	0.325581	0.003168	0.319958	0.501584	0.739176	0.986272	0.451954
0.262664	0.476548	0.260788	0.214286	0.148496	0.236842	0.030019	0.249531	0.439024	0.727955	1	0.007505	0.26454	0.534709	0.78424	0.998124	0.001876	0.213884	0.500938	0.724203	0.994371	0.686679	0.166979	0.146341	0.067669	0.037594	0.003759	0.001876	0.275797	0.553471	0.804878	1	0.015009	0.238274	0.377111	0.690432	0.981238	0.016886	0.195122	0.341463	0.716698	0.834897	0.484053	0.368421	0.009381	0.358349	0.641651	0.827392	0.994371	0.45591
0.357143	0.326531	0.316327	0.309278	0.226804	0.216495	0.05102	0.244898	0.489796	0.714286	0.979592	0.030612	0.326531	0.561224	0.806122	1	0.010204	0.112245	0.316327	0.693878	0.989796	0.530612	0.469388	0	0.123711	0	0	0.010204	0.142857	0.367347	0.714286	1	0.102041	0.387755	0.571429	0.795918	0.989796	0	0	0	0	0	0.428571	0.43299	0.040816	0.132653	0.397959	0.653061	0.959184	0.27551
0.386805	0.331177	0.282018	0.244819	0.224093	0.176166	0.002587	0.296248	0.56533	0.805951	0.996119	0.005175	0.163001	0.454075	0.717982	1	0.001294	0.27555	0.468305	0.676585	0.997413	0.457956	0.119017	0.423027	0.049223	0.082902	0.005181	0.001294	0.151358	0.508409	0.745149	1	0.086675	0.269082	0.39586	0.534282	0.956016	0.056921	0.30401	0.567917	0.807245	0.997413	0.438551	0.352332	0.010349	0.240621	0.428202	0.610608	0.997413	0.362225
0.417219	0.241722	0.34106	0.202658	0.272425	0.169435	0.009934	0.221854	0.506623	0.748344	1	0.006623	0.321192	0.519868	0.705298	0.993377	0.003311	0.231788	0.453642	0.751656	0.990066	0.519868	0.304636	0.175497	0.109635	0.049834	0.009967	0.003311	0.251656	0.44702	0.778146	1	0.006623	0.304636	0.586093	0.745033	0.963576	0.029801	0.096026	0.387417	0.539735	0.993377	0.509934	0.358804	0.013245	0.31457	0.503311	0.774834	0.990066	0.228477
0.384712	0.270677	0.344612	0.205772	0.292346	0.200753	0.007519	0.263158	0.501253	0.756892	1	0.005013	0.236842	0.483709	0.734336	0.994987	0.001253	0.240602	0.508772	0.746867	0.997494	0.463659	0.241855	0.294486	0.105395	0.055207	0.002509	0.001253	0.23183	0.483709	0.739348	1	0.038847	0.197995	0.41604	0.795739	0.997494	0.006266	0.319549	0.541353	0.703008	0.992481	0.570175	0.409034	0.003759	0.264411	0.47619	0.741855	0.997494	0.303258
0.478723	0.297872	0.223404	0.290323	0.204301	0.129032	0.031915	0.180851	0.425532	0.744681	0.989362	0.021277	0.276596	0.62766	0.765957	1	0.010638	0.297872	0.468085	0.617021	0.925532	0.148936	0.021277	0.829787	0.021505	0.064516	0	0.010638	0.031915	0.457447	0.702128	1	0.712766	0.712766	0.712766	0.712766	0.723404	0.053191	0.244681	0.489362	0.765957	0.978723	0.319149	0.430108	0.074468	0.297872	0.542553	0.712766	0.925532	0.234043
0.393162	0.290598	0.316239	0.266094	0.206009	0.214592	0.008547	0.183761	0.508547	0.769231	0.991453	0.038462	0.290598	0.491453	0.75641	0.995726	0.004274	0.239316	0.495726	0.705128	1	0.299145	0.102564	0.598291	0.038627	0.11588	0.004292	0.004274	0.149573	0.423077	0.75641	1	0.111111	0.773504	0.816239	0.84188	0.876068	0.017094	0.25641	0.474359	0.632479	0.982906	0.504274	0.351931	0.017094	0.222222	0.42735	0.632479	0.965812	0.269231
0.393382	0.448529	0.158088	0.376384	0.125461	0.121771	0.025735	0.264706	0.496324	0.790441	0.996324	0.007353	0.202206	0.477941	0.746324	1	0.003676	0.345588	0.492647	0.610294	0.985294	0.639706	0.213235	0.147059	0.088561	0.0369	0	0.003676	0.3125	0.636029	0.830882	1	0.022059	0.205882	0.481618	0.558824	0.985294	0.036765	0.069853	0.433824	0.573529	0.610294	0.356618	0.324723	0.014706	0.216912	0.459559	0.647059	0.985294	0.422794
0.3216	0.4112	0.2672	0.261218	0.184295	0.185897	0.0144	0.3024	0.5488	0.7776	0.9968	0.0032	0.2128	0.48	0.7888	1	0.0016	0.2592	0.4512	0.6736	0.9808	0.5424	0.1472	0.3104	0.049679	0.072115	0.008013	0.0016	0.2048	0.5344	0.856	1	0.016	0.384	0.5472	0.6992	0.9776	0.0048	0.2304	0.432	0.6176	0.8416	0.4704	0.278846	0.0096	0.2528	0.4288	0.6368	0.984	0.432
0.436975	0.319328	0.243697	0.271186	0.177966	0.186441	0.016807	0.176471	0.512605	0.764706	1	0.033613	0.319328	0.546218	0.739496	0.991597	0.008403	0.252101	0.352941	0.571429	0.966387	0.722689	0.07563	0.201681	0.042373	0.076271	0.025424	0.008403	0.294118	0.571429	0.747899	1	0.260504	0.268908	0.285714	0.428571	0.789916	0.067227	0.12605	0.319328	0.369748	0.915966	0.252101	0.220339	0.10084	0.252101	0.336134	0.411765	0.89916	0.386555
0.374126	0.297203	0.328671	0.225919	0.255692	0.211909	0.006993	0.277972	0.527972	0.774476	1	0.003497	0.236014	0.508741	0.748252	0.996503	0.001748	0.237762	0.456294	0.694056	0.991259	0.40035	0.386364	0.213287	0.113835	0.064799	0.019264	0.001748	0.26049	0.533217	0.744755	1	0.020979	0.25	0.479021	0.70979	0.935315	0.034965	0.199301	0.435315	0.802448	0.994755	0.452797	0.409807	0.005245	0.26049	0.5	0.723776	0.991259	0.335664
0.355372	0.297521	0.347107	0.204969	0.267081	0.186335	0.018595	0.229339	0.541322	0.791322	0.997934	0.004132	0.204545	0.42562	0.702479	1	0.002066	0.289256	0.506198	0.741736	0.995868	0.450413	0.173554	0.376033	0.066253	0.086957	0.004141	0.002066	0.130165	0.402893	0.719008	1	0.008264	0.419421	0.621901	0.762397	0.927686	0.115702	0.316116	0.52686	0.739669	0.993802	0.528926	0.356108	0.004132	0.318182	0.514463	0.764463	0.995868	0.340909
0.463087	0.288591	0.248322	0.236486	0.243243	0.128378	0.013423	0.261745	0.510067	0.838926	1	0.026846	0.201342	0.52349	0.66443	0.986577	0.006711	0.241611	0.449664	0.644295	0.865772	0.422819	0.248322	0.328859	0.128378	0.087838	0.02027	0.006711	0.288591	0.496644	0.731544	1	0.026846	0.348993	0.463087	0.57047	0.838926	0.060403	0.154362	0.657718	0.805369	0.979866	0.315436	0.364865	0.114094	0.302013	0.47651	0.651007	0.946309	0.275168
0.295669	0.404896	0.299435	0.273585	0.167925	0.273585	0.003766	0.210923	0.451977	0.72693	0.998117	0.013183	0.26742	0.506591	0.745763	0.996234	0.001883	0.250471	0.512241	0.747646	1	0.399247	0.07533	0.525424	0.030189	0.09434	0.003774	0.001883	0.244821	0.610169	0.79096	1	0.05838	0.681733	0.766478	0.919021	0.964218	0.00565	0.239171	0.436911	0.606403	0.992467	0.595104	0.369811	0.007533	0.274953	0.525424	0.762712	0.990584	0.444444
0.337931	0.37931	0.282759	0.238342	0.200345	0.193437	0.005172	0.281034	0.487931	0.762069	0.998276	0.003448	0.193103	0.412069	0.684483	0.994828	0.001724	0.291379	0.581034	0.77931	1	0.501724	0.106897	0.391379	0.034542	0.08981	0.003454	0.001724	0.239655	0.548276	0.806897	1	0.246552	0.57069	0.744828	0.834483	0.943103	0.008621	0.212069	0.394828	0.606897	0.977586	0.45	0.390328	0.008621	0.287931	0.575862	0.774138	0.994828	0.427586
0.274725	0.483516	0.241758	0.238971	0.136029	0.220588	0.014652	0.175824	0.417582	0.739927	0.978022	0.007326	0.238095	0.47619	0.714286	1	0.003663	0.358974	0.615385	0.791209	0.956044	0.47619	0.238095	0.285714	0.069853	0.055147	0.003676	0.003663	0.271062	0.413919	0.659341	1	0.131868	0.227106	0.538462	0.710623	0.835165	0.010989	0.076923	0.608059	0.893773	0.978022	0.571429	0.301471	0.018315	0.307692	0.549451	0.728938	0.992674	0.516484
0.362218	0.402946	0.234835	0.296618	0.155247	0.187337	0.0026	0.282496	0.577123	0.790295	1	0.001733	0.22357	0.511265	0.761698	0.999133	0.000867	0.237435	0.422877	0.630849	0.966205	0.506066	0.116118	0.377816	0.049436	0.085863	0.004337	0.000867	0.185442	0.52513	0.793761	1	0.016464	0.292894	0.409879	0.681976	0.886482	0.003466	0.281629	0.541594	0.70104	0.988735	0.444541	0.348656	0.003466	0.218371	0.414211	0.665511	0.966205	0.443674
0.300373	0.419776	0.279851	0.214953	0.181308	0.246729	0.005597	0.20709	0.43097	0.76306	0.996269	0.009328	0.31903	0.576493	0.742537	1	0.001866	0.231343	0.466418	0.73694	0.981343	0.632463	0.160448	0.20709	0.059813	0.052336	0	0.001866	0.276119	0.567164	0.727612	1	0.016791	0.171642	0.335821	0.848881	0.981343	0.035448	0.218284	0.438433	0.779851	0.955224	0.626866	0.261682	0.009328	0.333955	0.552239	0.723881	0.981343	0.440299
0.325815	0.338346	0.33584	0.202008	0.224592	0.252196	0.002506	0.261905	0.498747	0.740602	0.997494	0.005013	0.244361	0.503759	0.759398	0.998747	0.001253	0.236842	0.486216	0.725564	1	0.461153	0.245614	0.293233	0.097867	0.055207	0.002509	0.001253	0.230576	0.461153	0.73183	1	0.038847	0.201754	0.421053	0.813283	0.997494	0.006266	0.315789	0.538847	0.703008	0.989975	0.558897	0.393977	0.003759	0.266917	0.477444	0.743108	0.996241	0.337093
0.311881	0.387789	0.30033	0.22314	0.190083	0.271074	0.006601	0.221122	0.457096	0.712871	0.9967	0.0033	0.262376	0.4967	0.762376	1	0.00165	0.242574	0.536304	0.764026	0.99835	0.528053	0.20132	0.270627	0.072727	0.056198	0.003306	0.00165	0.277228	0.468647	0.712871	1	0.087459	0.227723	0.59736	0.744224	0.99505	0.013201	0.193069	0.544554	0.80363	0.963696	0.539604	0.37686	0.009901	0.249175	0.531353	0.767327	0.99505	0.419142
0.320805	0.377181	0.302013	0.232527	0.204301	0.216398	0.010738	0.230872	0.491275	0.711409	1	0.002685	0.328859	0.614765	0.809396	0.990604	0.001342	0.220134	0.395973	0.61745	0.997315	0.586577	0.126174	0.287248	0.051075	0.051075	0.002688	0.001342	0.314094	0.66443	0.830872	1	0.128859	0.22953	0.589262	0.755705	0.997315	0.044295	0.174497	0.33557	0.491275	0.672483	0.500671	0.352151	0.004027	0.244295	0.424161	0.632215	0.997315	0.397315
0.336842	0.336842	0.326316	0.21164	0.259259	0.26455	0.021053	0.242105	0.478947	0.736842	1	0.010526	0.184211	0.431579	0.731579	0.984211	0.005263	0.321053	0.542105	0.757895	0.973684	0.405263	0.473684	0.121053	0.164021	0.037037	0.005291	0.005263	0.284211	0.589474	0.815789	1	0.010526	0.336842	0.531579	0.705263	0.978947	0.078947	0.1	0.242105	0.289474	0.736842	0.468421	0.507937	0.015789	0.257895	0.478947	0.726316	0.984211	0.342105
0.336449	0.351135	0.312417	0.217914	0.219251	0.223262	0.004005	0.312417	0.542056	0.815754	1	0.008011	0.202937	0.479306	0.70761	0.99733	0.001335	0.222964	0.46996	0.699599	0.998665	0.403204	0.261682	0.335113	0.076203	0.057487	0.009358	0.001335	0.221629	0.516689	0.781041	1	0.006676	0.158879	0.508678	0.783712	0.923899	0.029372	0.296395	0.405874	0.716956	0.99733	0.574099	0.36631	0.012016	0.208278	0.479306	0.676903	0.998665	0.376502
0.355362	0.397756	0.246883	0.267166	0.168539	0.179775	0.013716	0.278055	0.586035	0.811721	1	0.002494	0.225686	0.498753	0.766833	0.993766	0.001247	0.23192	0.405237	0.620948	0.997506	0.490025	0.117207	0.392768	0.052434	0.082397	0.002497	0.001247	0.238155	0.567332	0.812968	1	0.125935	0.286783	0.413965	0.509975	0.845387	0.03616	0.256858	0.517456	0.682045	0.997506	0.4202	0.337079	0.004988	0.216958	0.395262	0.584788	0.976309	0.413965
0.354118	0.335294	0.310588	0.244994	0.208481	0.207303	0.005882	0.277647	0.550588	0.762353	1	0.007059	0.214118	0.46	0.712941	0.998824	0.001176	0.263529	0.489412	0.754118	0.997647	0.418824	0.150588	0.430588	0.058893	0.08245	0.009423	0.001176	0.211765	0.511765	0.730588	1	0.002353	0.169412	0.365882	0.578824	0.985882	0.021176	0.329412	0.56	0.814118	0.997647	0.503529	0.414605	0.003529	0.229412	0.465882	0.695294	0.997647	0.335294
0.297143	0.411429	0.291429	0.293103	0.172414	0.201149	0.022857	0.365714	0.571429	0.805714	1	0.011429	0.194286	0.377143	0.691429	0.994286	0.005714	0.245714	0.497143	0.754286	0.971429	0.28	0.28	0.44	0.04023	0.109195	0.017241	0.005714	0.154286	0.285714	0.588571	1	0.234286	0.76	0.828571	0.908571	0.982857	0.011429	0.2	0.445714	0.577143	0.748571	0.445714	0.505747	0.017143	0.262857	0.497143	0.691429	0.971429	0.434286
0.411215	0.299065	0.28972	0.320755	0.283019	0.150943	0.046729	0.280374	0.514019	0.738318	0.981308	0.018692	0.233645	0.429907	0.728972	0.953271	0.009346	0.205607	0.504673	0.757009	1	0.504673	0.252336	0.242991	0.113208	0.056604	0	0.009346	0.121495	0.439252	0.794393	1	0.373832	0.420561	0.663551	0.859813	0.971963	0.168224	0.271028	0.336449	0.514019	0.579439	0.364486	0.415094	0.037383	0.242991	0.420561	0.654206	0.971963	0.280374
0.346626	0.297546	0.355828	0.252308	0.246154	0.209231	0.015337	0.257669	0.493865	0.766871	0.98773	0.006135	0.315951	0.54908	0.730061	0.996933	0.003067	0.205521	0.46319	0.733129	1	0.52454	0.288344	0.187117	0.104615	0.049231	0.012308	0.003067	0.248466	0.530675	0.794479	1	0.009202	0.282209	0.555215	0.717791	0.92638	0.033742	0.101227	0.389571	0.52454	0.993865	0.515337	0.387692	0.01227	0.322086	0.518405	0.757669	0.993865	0.297546
0.349112	0.352663	0.298225	0.218009	0.204976	0.218009	0.007101	0.23432	0.433136	0.71716	1	0.002367	0.228402	0.491124	0.759763	0.99645	0.001183	0.293491	0.553846	0.757396	0.997633	0.512426	0.102959	0.384615	0.0391	0.074645	0.003555	0.001183	0.247337	0.376331	0.624852	1	0.033136	0.576331	0.700592	0.785799	0.99645	0.00355	0.182249	0.586982	0.804734	0.984615	0.459172	0.381517	0.005917	0.336095	0.583432	0.782249	0.995266	0.391716
0.445545	0.277228	0.277228	0.25	0.26	0.11	0.019802	0.247525	0.534653	0.772277	1	0.029703	0.277228	0.435644	0.663366	0.980198	0.009901	0.217822	0.425743	0.752475	0.910891	0.366337	0.306931	0.326733	0.11	0.05	0.01	0.009901	0.326733	0.475248	0.80198	1	0.039604	0.09901	0.49505	0.623762	0.920792	0.158416	0.227723	0.306931	0.752475	0.871287	0.475248	0.42	0.039604	0.227723	0.49505	0.722772	0.930693	0.29703
0.367188	0.3125	0.320312	0.247059	0.239216	0.203922	0.015625	0.230469	0.5	0.695312	0.996094	0.007812	0.261719	0.546875	0.808594	1	0.003906	0.226562	0.472656	0.710938	0.992188	0.359375	0.121094	0.519531	0.058824	0.098039	0.003922	0.003906	0.136719	0.492188	0.753906	1	0.015625	0.152344	0.273438	0.644531	0.78125	0.027344	0.3125	0.527344	0.8125	0.992188	0.515625	0.376471	0.019531	0.222656	0.433594	0.71875	0.878906	0.320312
0.431767	0.369128	0.199105	0.320628	0.183857	0.14574	0.008949	0.272931	0.512304	0.774049	1	0.004474	0.187919	0.42953	0.686801	0.975391	0.002237	0.304251	0.624161	0.753915	0.995526	0.753915	0.053691	0.192394	0.038117	0.05157	0.002242	0.002237	0.234899	0.427293	0.720358	1	0.053691	0.178971	0.199105	0.691275	0.832215	0.114094	0.608501	0.702461	0.760626	0.988814	0.373602	0.367713	0.013423	0.425056	0.58613	0.751678	0.995526	0.353468
0.432432	0.261261	0.306306	0.245455	0.263636	0.145455	0.018018	0.279279	0.468468	0.747748	0.990991	0.045045	0.189189	0.567568	0.792793	1	0.009009	0.234234	0.387387	0.657658	0.954955	0.396396	0.513514	0.09009	0.163636	0.018182	0	0.009009	0.198198	0.468468	0.684685	1	0.036036	0.225225	0.387387	0.630631	0.855856	0.891892	0.900901	0.927928	0.945946	0.972973	0.441441	0.327273	0.036036	0.243243	0.495495	0.630631	0.954955	0.288288
0.275552	0.399862	0.324586	0.212163	0.188666	0.25501	0.004834	0.277624	0.517956	0.751381	0.994475	0.001381	0.242403	0.481354	0.723757	0.998619	0.000691	0.226519	0.506215	0.774862	1	0.54558	0.349448	0.104972	0.115411	0.036628	0.00622	0.000691	0.245166	0.473066	0.700276	1	0.014503	0.223066	0.486188	0.766575	0.935773	0.002072	0.361878	0.731354	0.955801	0.998619	0.602901	0.304077	0.002072	0.23895	0.5	0.756906	0.997928	0.412293
0.347107	0.318182	0.334711	0.215768	0.19917	0.240664	0.008264	0.22314	0.487603	0.719008	0.995868	0.016529	0.27686	0.545455	0.780992	0.979339	0.004132	0.247934	0.450413	0.714876	1	0.516529	0.330579	0.152893	0.13278	0.041494	0.016598	0.004132	0.264463	0.557851	0.818182	1	0.115702	0.285124	0.533058	0.731405	0.96281	0.008264	0.041322	0.099174	0.475207	0.987603	0.549587	0.390041	0.016529	0.31405	0.533058	0.780992	0.991736	0.285124
0.459854	0.29781	0.242336	0.247076	0.192982	0.168129	0.00292	0.265693	0.49635	0.770803	1	0.005839	0.251095	0.50219	0.728467	0.99708	0.00146	0.227737	0.490511	0.713869	0.986861	0.477372	0.191241	0.331387	0.068713	0.065789	0.004386	0.00146	0.205839	0.437956	0.716788	1	0.039416	0.256934	0.465693	0.681752	0.932847	0.056934	0.331387	0.629197	0.835036	0.99562	0.410219	0.330409	0.014599	0.258394	0.464234	0.684672	0.986861	0.359124
0.33526	0.346821	0.317919	0.215116	0.238372	0.215116	0.017341	0.236994	0.450867	0.722543	0.99422	0.011561	0.219653	0.485549	0.745665	0.982659	0.00578	0.242775	0.526012	0.751445	1	0.462428	0.127168	0.410405	0.05814	0.104651	0.023256	0.00578	0.156069	0.595376	0.780347	1	0.283237	0.346821	0.699422	0.745665	0.988439	0.046243	0.312139	0.445087	0.566474	0.930636	0.462428	0.430233	0.023121	0.404624	0.572254	0.710983	0.988439	0.306358
0.375167	0.381842	0.242991	0.284759	0.168449	0.167112	0.00267	0.214953	0.453939	0.75968	1	0.004005	0.23231	0.503338	0.739653	0.995995	0.001335	0.335113	0.544726	0.735648	0.99733	0.568758	0.130841	0.300401	0.045455	0.072193	0.002674	0.001335	0.158879	0.41522	0.728972	1	0.238985	0.424566	0.611482	0.731642	0.837116	0.004005	0.359146	0.558077	0.774366	0.949266	0.425901	0.339572	0.004005	0.325768	0.522029	0.732977	0.99733	0.421896
0.388158	0.328947	0.282895	0.178808	0.245033	0.198675	0.019737	0.328947	0.447368	0.690789	0.973684	0.065789	0.236842	0.559211	0.736842	1	0.006579	0.151316	0.5	0.789474	0.986842	0.328947	0.282895	0.388158	0.112583	0.072848	0.019868	0.006579	0.171053	0.578947	0.763158	1	0.052632	0.276316	0.638158	0.901316	0.993421	0.026316	0.296053	0.394737	0.493421	0.835526	0.401316	0.490066	0.026316	0.217105	0.539474	0.743421	0.980263	0.361842
0.318623	0.43248	0.248897	0.242049	0.174912	0.218198	0.00353	0.247132	0.507502	0.76346	0.992056	0.001765	0.313327	0.541041	0.759047	1	0.000883	0.181818	0.399823	0.699029	0.994704	0.640777	0.059135	0.300088	0.036219	0.060954	0.00265	0.000883	0.40865	0.578994	0.768756	1	0.007944	0.227714	0.739629	0.793469	0.954987	0.031774	0.157988	0.269197	0.390997	0.969991	0.424537	0.392226	0.002648	0.217123	0.445719	0.721977	0.978817	0.43248
0.284884	0.337209	0.377907	0.19883	0.210526	0.274854	0.046512	0.302326	0.546512	0.802326	0.965116	0.017442	0.226744	0.418605	0.662791	1	0.005814	0.255814	0.488372	0.738372	0.994186	0.406977	0.494186	0.098837	0.152047	0.023392	0	0.005814	0.319767	0.656977	0.773256	1	0.011628	0.30814	0.505814	0.744186	0.94186	0.087209	0.127907	0.151163	0.174419	0.203488	0.569767	0.397661	0.011628	0.27907	0.534884	0.744186	0.994186	0.354651
0.373626	0.344041	0.282333	0.236041	0.205584	0.193739	0.002536	0.202029	0.431107	0.716822	0.999155	0.001691	0.258664	0.509721	0.75317	0.995773	0.000845	0.344041	0.543533	0.764159	1	0.415046	0.114117	0.470837	0.038917	0.093063	0.003384	0.000845	0.209637	0.46492	0.726965	1	0.034658	0.474218	0.621302	0.897718	0.989856	0.003381	0.248521	0.482671	0.760778	0.993238	0.457312	0.328257	0.003381	0.393068	0.596788	0.795435	0.997464	0.373626
0.379971	0.33137	0.28866	0.255162	0.225664	0.171091	0.007364	0.21944	0.493373	0.75405	0.998527	0.004418	0.151694	0.427099	0.720177	1	0.001473	0.381443	0.578792	0.759941	0.995582	0.544919	0.142857	0.312224	0.048673	0.066372	0.007375	0.001473	0.148748	0.291605	0.628866	1	0.0162	0.509573	0.677467	0.801178	0.916053	0.125184	0.446244	0.606775	0.821797	0.989691	0.455081	0.327434	0.004418	0.416789	0.57732	0.78056	0.994109	0.37408
0.344928	0.321739	0.333333	0.22061	0.243832	0.217707	0.004348	0.257971	0.517391	0.769565	0.991304	0.002899	0.211594	0.468116	0.713043	0.995652	0.001449	0.266667	0.515942	0.750725	1	0.401449	0.205797	0.392754	0.089985	0.063861	0.011611	0.001449	0.302899	0.508696	0.805797	1	0.005797	0.202899	0.434783	0.830435	0.998551	0.028986	0.201449	0.52029	0.649275	0.952174	0.562319	0.409289	0.007246	0.265217	0.488406	0.718841	0.997101	0.328986
0.357955	0.306818	0.335227	0.245714	0.245714	0.211429	0.017045	0.232955	0.471591	0.647727	0.965909	0.028409	0.267045	0.539773	0.8125	0.988636	0.005682	0.198864	0.494318	0.755682	1	0.431818	0.306818	0.261364	0.142857	0.062857	0.005714	0.005682	0.369318	0.585227	0.721591	1	0.130682	0.323864	0.431818	0.846591	0.994318	0.022727	0.079545	0.210227	0.5625	0.9375	0.448864	0.422857	0.022727	0.221591	0.579545	0.818182	0.994318	0.284091
0.332103	0.306273	0.361624	0.185185	0.244444	0.240741	0.01845	0.258303	0.479705	0.774908	0.99631	0.01476	0.228782	0.546125	0.719557	1	0.00369	0.217712	0.461255	0.715867	0.99262	0.350554	0.177122	0.472325	0.051852	0.088889	0	0.00369	0.151292	0.383764	0.634686	1	0.121771	0.295203	0.369004	0.568266	0.660517	0.01845	0.258303	0.704797	0.826568	0.99262	0.542435	0.407407	0.01476	0.217712	0.461255	0.649446	0.98893	0.335793
0.393777	0.378755	0.227468	0.276047	0.167562	0.166488	0.002146	0.22103	0.453863	0.759657	1	0.006438	0.265021	0.498927	0.762876	0.995708	0.001073	0.362661	0.531116	0.712446	0.993562	0.533262	0.100858	0.36588	0.038668	0.079484	0.004296	0.001073	0.201717	0.378755	0.727468	1	0.045064	0.403433	0.555794	0.684549	0.767167	0.01073	0.374464	0.567597	0.804721	0.966738	0.407725	0.322234	0.022532	0.370172	0.519313	0.712446	0.993562	0.4603
0.345932	0.363717	0.290351	0.242883	0.205961	0.207295	0.003112	0.266785	0.536683	0.738995	1	0.000889	0.241885	0.470431	0.752334	0.998666	0.000445	0.228991	0.489551	0.767452	0.998221	0.501112	0.102268	0.396621	0.047153	0.08452	0.003559	0.000445	0.30458	0.53446	0.746109	1	0.001779	0.251667	0.435305	0.603824	0.986661	0.008004	0.185416	0.468208	0.781236	0.996443	0.501112	0.395018	0.001334	0.242775	0.494442	0.767452	0.998221	0.392174
0.356877	0.27881	0.364312	0.179104	0.253731	0.19403	0.01487	0.219331	0.449814	0.743494	0.992565	0.05948	0.263941	0.513011	0.750929	0.988848	0.003717	0.241636	0.509294	0.728625	1	0.35316	0.182156	0.464684	0.052239	0.097015	0	0.003717	0.167286	0.416357	0.695167	1	0.171004	0.330855	0.431227	0.635688	0.732342	0.01487	0.237918	0.524164	0.825279	0.996283	0.550186	0.425373	0.011152	0.256506	0.472119	0.680297	0.98513	0.282528
0.313589	0.397213	0.289199	0.223776	0.178322	0.244755	0.038328	0.229965	0.41115	0.783972	1	0.006969	0.292683	0.526132	0.686411	0.993031	0.003484	0.191638	0.508711	0.790941	0.989547	0.606272	0.188153	0.205575	0.083916	0.048951	0	0.003484	0.355401	0.529617	0.679443	1	0.010453	0.170732	0.313589	0.853659	0.993031	0.101045	0.146341	0.348432	0.804878	0.937282	0.439024	0.405594	0.010453	0.212544	0.522648	0.763066	0.993031	0.390244
0.337838	0.351351	0.310811	0.236806	0.215156	0.2341	0.008108	0.27973	0.521622	0.75	0.997297	0.002703	0.214865	0.468919	0.739189	0.998649	0.001351	0.262162	0.497297	0.754054	1	0.497297	0.164865	0.337838	0.069012	0.071719	0.006766	0.001351	0.217568	0.387838	0.718919	1	0.056757	0.262162	0.491892	0.693243	0.997297	0.005405	0.402703	0.571622	0.841892	0.985135	0.524324	0.359946	0.005405	0.222973	0.471622	0.744595	0.995946	0.378378
0.289593	0.420814	0.289593	0.213636	0.159091	0.227273	0.022624	0.20362	0.542986	0.80543	0.995475	0.00905	0.208145	0.470588	0.687783	1	0.004525	0.303167	0.488688	0.764706	0.986425	0.647059	0.180995	0.171946	0.081818	0.054545	0.018182	0.004525	0.221719	0.538462	0.782805	1	0.167421	0.447964	0.651584	0.764706	0.941176	0.022624	0.117647	0.348416	0.402715	0.977376	0.533937	0.263636	0.099548	0.348416	0.547511	0.742081	0.972851	0.434389
0.396117	0.378641	0.225243	0.287938	0.169261	0.182879	0.01165	0.314563	0.537864	0.776699	1	0.003883	0.24466	0.473786	0.700971	0.990291	0.001942	0.194175	0.421359	0.753398	0.992233	0.737864	0.102913	0.159223	0.038911	0.027237	0.007782	0.001942	0.357282	0.541748	0.726214	1	0.052427	0.159223	0.223301	0.291262	0.968932	0.009709	0.124272	0.174757	0.848544	0.91068	0.221359	0.206226	0.005825	0.11068	0.219417	0.718447	0.968932	0.392233
0.290844	0.414722	0.294434	0.23741	0.176259	0.26259	0.003591	0.240575	0.48474	0.788151	0.994614	0.005386	0.253142	0.517056	0.694794	0.998205	0.001795	0.244165	0.472172	0.745063	1	0.603232	0.213645	0.183124	0.071942	0.05036	0	0.001795	0.263914	0.517056	0.732496	1	0.014363	0.231598	0.454219	0.773788	0.994614	0.030521	0.199282	0.43088	0.745063	0.964093	0.536804	0.330935	0.005386	0.233393	0.493716	0.692998	0.992819	0.420108
0.410345	0.258621	0.331034	0.197232	0.276817	0.16263	0.006897	0.341379	0.544828	0.782759	1	0.010345	0.12069	0.37931	0.675862	0.910345	0.003448	0.248276	0.451724	0.765517	0.996552	0.396552	0.251724	0.351724	0.083045	0.062284	0	0.003448	0.203448	0.482759	0.631034	1	0.013793	0.17931	0.496552	0.775862	0.944828	0.055172	0.344828	0.544828	0.696552	0.993103	0.565517	0.366782	0.010345	0.210345	0.465517	0.713793	0.993103	0.265517
0.277834	0.38014	0.342026	0.210843	0.199799	0.279116	0.003009	0.254764	0.481444	0.747242	1	0.002006	0.278837	0.508526	0.74323	0.996991	0.001003	0.219659	0.494483	0.750251	0.998997	0.468405	0.27984	0.251755	0.101406	0.057229	0.01506	0.001003	0.332999	0.558676	0.789368	1	0.004012	0.344032	0.5667	0.764293	0.976931	0.007021	0.078235	0.203611	0.553661	0.93681	0.61986	0.343373	0.004012	0.251755	0.52658	0.762287	0.998997	0.394183
0.34507	0.302817	0.352113	0.241135	0.22695	0.212766	0.035211	0.21831	0.464789	0.647887	0.957746	0.014085	0.267606	0.577465	0.823944	0.985915	0.007042	0.197183	0.450704	0.732394	1	0.380282	0.352113	0.267606	0.163121	0.049645	0.007092	0.007042	0.316901	0.556338	0.732394	1	0.169014	0.422535	0.577465	0.816901	0.992958	0.042254	0.098592	0.232394	0.295775	0.922535	0.478873	0.347518	0.035211	0.253521	0.612676	0.809859	1	0.316901
0.340836	0.363344	0.29582	0.245161	0.183871	0.2	0.009646	0.308682	0.578778	0.778135	1	0.006431	0.167203	0.434084	0.649518	0.996785	0.003215	0.276527	0.517685	0.77492	0.990354	0.421222	0.221865	0.356913	0.077419	0.058065	0	0.003215	0.167203	0.44373	0.649518	1	0.051447	0.196141	0.418006	0.755627	0.945338	0.096463	0.366559	0.572347	0.829582	0.983923	0.546624	0.335484	0.054662	0.237942	0.472669	0.726688	0.990354	0.379421
0.355	0.32	0.325	0.221106	0.251256	0.226131	0.01	0.19	0.425	0.67	0.985	0.015	0.215	0.525	0.78	1	0.005	0.31	0.535	0.75	0.945	0.45	0.445	0.105	0.130653	0.030151	0	0.005	0.29	0.59	0.835	1	0.015	0.315	0.495	0.67	0.92	0.085	0.105	0.235	0.26	0.705	0.445	0.462312	0.02	0.25	0.475	0.71	0.94	0.375
0.406667	0.246667	0.346667	0.174497	0.261745	0.187919	0.013333	0.28	0.446667	0.7	1	0.066667	0.253333	0.52	0.813333	0.993333	0.006667	0.193333	0.48	0.753333	0.946667	0.36	0.306667	0.333333	0.127517	0.04698	0.006711	0.006667	0.16	0.573333	0.78	1	0.013333	0.24	0.6	0.853333	0.953333	0.053333	0.3	0.386667	0.466667	0.686667	0.373333	0.456376	0.02	0.2	0.526667	0.706667	0.946667	0.253333
0.325714	0.379048	0.295238	0.232824	0.192748	0.221374	0.011429	0.268571	0.48	0.805714	1	0.00381	0.241905	0.554286	0.779048	0.986667	0.001905	0.198095	0.441905	0.641905	0.998095	0.466667	0.07619	0.457143	0.028626	0.078244	0.005725	0.001905	0.262857	0.617143	0.84381	1	0.059048	0.171429	0.220952	0.598095	0.986667	0.005714	0.314286	0.48	0.645714	0.99619	0.525714	0.320611	0.007619	0.234286	0.481905	0.666667	0.99619	0.417143
0.349359	0.416667	0.233974	0.292135	0.144462	0.224719	0.004808	0.248397	0.49359	0.703526	0.995192	0.003205	0.233974	0.509615	0.759615	0.996795	0.001603	0.258013	0.490385	0.764423	1	0.612179	0.116987	0.270833	0.048154	0.057785	0	0.001603	0.232372	0.496795	0.735577	1	0.041667	0.262821	0.418269	0.589744	0.940705	0.016026	0.302885	0.525641	0.793269	0.985577	0.392628	0.382022	0.014423	0.270833	0.554487	0.783654	0.99359	0.405449
0.365722	0.336032	0.298246	0.233784	0.225676	0.17973	0.002699	0.238866	0.503374	0.751687	0.982456	0.004049	0.242915	0.502024	0.761134	0.99865	0.00135	0.252362	0.487179	0.724696	1	0.489879	0.048583	0.461538	0.022973	0.117568	0.004054	0.00135	0.240216	0.502024	0.767881	1	0.072874	0.564103	0.585695	0.677463	0.817814	0.005398	0.236167	0.460189	0.754386	0.964912	0.561404	0.408108	0.004049	0.272605	0.487179	0.708502	0.995951	0.357625
0.396667	0.256667	0.346667	0.207358	0.230769	0.19398	0.01	0.276667	0.493333	0.74	1	0.016667	0.193333	0.476667	0.75	0.986667	0.003333	0.266667	0.5	0.76	0.993333	0.403333	0.25	0.346667	0.073579	0.053512	0	0.003333	0.203333	0.483333	0.7	1	0.02	0.18	0.5	0.77	0.933333	0.06	0.336667	0.536667	0.68	0.976667	0.556667	0.354515	0.016667	0.21	0.466667	0.71	0.986667	0.253333
0.445378	0.218487	0.336134	0.118644	0.322034	0.169492	0.016807	0.210084	0.521008	0.705882	0.991597	0.07563	0.235294	0.571429	0.848739	0.941176	0.008403	0.243697	0.436975	0.630252	1	0.470588	0.042017	0.487395	0.008475	0.127119	0.008475	0.008403	0.134454	0.722689	0.848739	1	0.151261	0.151261	0.159664	0.168067	0.184874	0.02521	0.319328	0.504202	0.621849	0.983193	0.403361	0.389831	0.033613	0.201681	0.411765	0.714286	0.966387	0.201681
0.314425	0.463533	0.222042	0.26461	0.157468	0.194805	0.006483	0.222042	0.505673	0.748784	0.996759	0.003241	0.269044	0.47812	0.724473	1	0.001621	0.241491	0.547812	0.777958	0.998379	0.654781	0.029173	0.316045	0.025974	0.061688	0	0.001621	0.314425	0.518639	0.750405	1	0.009724	0.320908	0.52188	0.696921	0.820097	0.06483	0.19611	0.354943	0.893031	0.990276	0.486224	0.373377	0.009724	0.291734	0.606159	0.771475	0.983793	0.494327
0.424528	0.358491	0.216981	0.285714	0.171429	0.161905	0.028302	0.198113	0.396226	0.613208	0.877358	0.018868	0.301887	0.622642	0.773585	1	0.009434	0.226415	0.518868	0.801887	0.981132	0.273585	0	0.726415	0	0.057143	0	0.009434	0.066038	0.669811	0.924528	1	0	0	0	0	0	0.084906	0.254717	0.462264	0.641509	0.896226	0.292453	0.361905	0.226415	0.386792	0.59434	0.801887	0.962264	0.349057
0.449123	0.284211	0.266667	0.253521	0.232394	0.15493	0.007018	0.224561	0.494737	0.722807	0.992982	0.010526	0.245614	0.491228	0.761404	0.975439	0.003509	0.284211	0.508772	0.768421	1	0.421053	0.207018	0.37193	0.070423	0.077465	0	0.003509	0.249123	0.480702	0.701754	1	0.161404	0.333333	0.65614	0.789474	0.922807	0.017544	0.133333	0.491228	0.726316	0.992982	0.336842	0.302817	0.02807	0.305263	0.568421	0.761404	0.996491	0.34386
0.301691	0.511053	0.187256	0.266927	0.130208	0.154948	0.002601	0.231469	0.477243	0.708713	1	0.005202	0.240572	0.564369	0.804941	0.9987	0.0013	0.284785	0.452536	0.635891	0.958388	0.629389	0.140442	0.230169	0.061198	0.040365	0.001302	0.0013	0.224967	0.511053	0.772432	1	0.044213	0.271782	0.392718	0.544863	0.702211	0.071521	0.351105	0.576073	0.829649	0.972692	0.405722	0.346354	0.003901	0.271782	0.474642	0.724317	0.976593	0.524057
0.30102	0.428571	0.270408	0.253197	0.173913	0.237852	0.007653	0.227041	0.47449	0.721939	1	0.015306	0.288265	0.556122	0.811224	0.997449	0.002551	0.183673	0.446429	0.69898	0.992347	0.558673	0.214286	0.227041	0.081841	0.051151	0	0.002551	0.265306	0.561224	0.859694	1	0.02551	0.178571	0.392857	0.576531	0.742347	0.056122	0.216837	0.433673	0.691327	0.795918	0.510204	0.286445	0.022959	0.295918	0.594388	0.829082	0.987245	0.428571
0.308029	0.39854	0.293431	0.230994	0.185673	0.219298	0.013139	0.143066	0.420438	0.686131	1	0.00292	0.306569	0.563504	0.807299	0.99708	0.00146	0.277372	0.458394	0.712409	0.941606	0.519708	0.141606	0.338686	0.054094	0.068713	0.004386	0.00146	0.134307	0.464234	0.805839	1	0.005839	0.347445	0.490511	0.648175	0.916788	0.159124	0.332847	0.543066	0.731387	0.90219	0.50073	0.345029	0.00438	0.29927	0.510949	0.722628	0.979562	0.445255
0.33377	0.328534	0.337696	0.195282	0.242464	0.241153	0.002618	0.294503	0.526178	0.756545	0.998691	0.005236	0.240838	0.469895	0.751309	1	0.001309	0.222513	0.497382	0.740838	0.997382	0.467277	0.218586	0.314136	0.087811	0.058978	0.001311	0.001309	0.21466	0.441099	0.727749	1	0.040576	0.153141	0.498691	0.820681	0.997382	0.006545	0.328534	0.531414	0.710733	0.990838	0.574607	0.40367	0.003927	0.239529	0.472513	0.744764	0.997382	0.337696
0.383562	0.324201	0.292237	0.237986	0.221968	0.19222	0.004566	0.267123	0.557078	0.853881	1	0.009132	0.230594	0.484018	0.703196	0.990868	0.002283	0.237443	0.43379	0.675799	0.97032	0.385845	0.164384	0.449772	0.059497	0.08238	0.004577	0.002283	0.237443	0.468037	0.73516	1	0.100457	0.299087	0.504566	0.682648	0.796804	0.013699	0.216895	0.531963	0.819635	0.974886	0.525114	0.347826	0.013699	0.210046	0.422374	0.680365	0.97032	0.324201
0.308707	0.426121	0.265172	0.241744	0.147952	0.244386	0.01847	0.257256	0.505277	0.774406	1	0.002639	0.234828	0.536939	0.773087	0.997361	0.001319	0.244063	0.437995	0.668865	0.996042	0.530343	0.139842	0.329815	0.059445	0.064729	0.001321	0.001319	0.224274	0.565963	0.864116	1	0.005277	0.275726	0.42876	0.576517	0.980211	0.025066	0.262533	0.478892	0.651715	0.832454	0.493404	0.346103	0.005277	0.275726	0.485488	0.700528	0.996042	0.465699
0.401015	0.284264	0.314721	0.214286	0.25	0.173469	0.015228	0.253807	0.527919	0.761421	1	0.010152	0.208122	0.446701	0.715736	0.994924	0.005076	0.243655	0.502538	0.741117	0.984772	0.467005	0.187817	0.345178	0.066327	0.066327	0.02551	0.005076	0.152284	0.522843	0.766497	1	0.071066	0.274112	0.614213	0.939086	0.989848	0.040609	0.324873	0.426396	0.720812	0.918782	0.502538	0.408163	0.020305	0.329949	0.502538	0.746193	0.984772	0.279188
0.344828	0.349754	0.305419	0.252475	0.207921	0.232673	0.014778	0.270936	0.507389	0.729064	1	0.009852	0.17734	0.423645	0.773399	0.995074	0.004926	0.295567	0.477833	0.694581	0.901478	0.408867	0.428571	0.162562	0.133663	0.054455	0.00495	0.004926	0.275862	0.566502	0.802956	1	0.019704	0.315271	0.472906	0.655172	0.901478	0.083744	0.118227	0.261084	0.935961	0.985222	0.453202	0.445545	0.019704	0.251232	0.463054	0.694581	0.906404	0.344828
0.373874	0.382883	0.243243	0.312217	0.18552	0.171946	0.013514	0.225225	0.45045	0.725225	0.986486	0.009009	0.265766	0.472973	0.752252	1	0.004505	0.171171	0.558559	0.738739	0.936937	0.54955	0.130631	0.31982	0.072398	0.072398	0	0.004505	0.256757	0.405405	0.68018	1	0.018018	0.072072	0.563063	0.702703	0.878378	0.094595	0.193694	0.612613	0.828829	0.990991	0.5	0.352941	0.018018	0.31982	0.504505	0.738739	0.981982	0.396396
0.356522	0.304348	0.33913	0.209607	0.279476	0.218341	0.017391	0.256522	0.495652	0.8	0.995652	0.008696	0.269565	0.53913	0.734783	0.986957	0.004348	0.2	0.434783	0.730435	1	0.356522	0.204348	0.43913	0.069869	0.069869	0.008734	0.004348	0.317391	0.643478	0.826087	1	0.147826	0.208696	0.365217	0.769565	0.882609	0.013043	0.117391	0.447826	0.634783	0.991304	0.495652	0.436681	0.026087	0.278261	0.504348	0.704348	0.986957	0.282609
0.488235	0.264706	0.247059	0.272189	0.201183	0.201183	0.029412	0.235294	0.494118	0.794118	0.994118	0.011765	0.205882	0.441176	0.729412	0.988235	0.005882	0.294118	0.517647	0.652941	1	0.770588	0.041176	0.188235	0.053254	0.029586	0.005917	0.005882	0.188235	0.441176	0.8	1	0.358824	0.358824	0.470588	0.741176	0.852941	0.394118	0.435294	0.570588	0.617647	0.705882	0.247059	0.284024	0.047059	0.405882	0.570588	0.647059	0.976471	0.252941
0.354015	0.237226	0.408759	0.135531	0.315018	0.179487	0.007299	0.218978	0.492701	0.79562	1	0.029197	0.29562	0.562044	0.726277	0.952555	0.00365	0.233577	0.448905	0.70438	0.99635	0.39781	0.178832	0.423358	0.051282	0.10989	0	0.00365	0.211679	0.463504	0.718978	1	0.142336	0.30292	0.39781	0.609489	0.70438	0.010949	0.255474	0.507299	0.813869	0.981752	0.540146	0.410256	0.029197	0.240876	0.478102	0.675182	0.99635	0.226277
0.34662	0.414211	0.239168	0.236111	0.170139	0.199653	0.003466	0.275563	0.481802	0.717504	0.996534	0.006932	0.233969	0.551127	0.760832	1	0.001733	0.242634	0.433276	0.753899	0.993068	0.594454	0.02253	0.383016	0.010417	0.100694	0.013889	0.001733	0.207972	0.514731	0.755633	1	0.02773	0.031196	0.554593	0.712305	0.816291	0.045061	0.311958	0.464471	0.69844	0.994801	0.384749	0.357639	0.010399	0.244367	0.485269	0.769497	0.993068	0.410745
0.363636	0.222222	0.414141	0.152284	0.335025	0.182741	0.010101	0.232323	0.409091	0.69697	0.994949	0.035354	0.212121	0.545455	0.777778	0.989899	0.005051	0.267677	0.540404	0.742424	1	0.40404	0.212121	0.383838	0.071066	0.091371	0.020305	0.005051	0.141414	0.5	0.681818	1	0.045455	0.217172	0.570707	0.89899	0.989899	0.186869	0.338384	0.439394	0.757576	0.919192	0.464646	0.436548	0.045455	0.343434	0.505051	0.727273	0.984848	0.161616
0.385841	0.320354	0.293805	0.241135	0.218085	0.205674	0.00531	0.221239	0.492035	0.785841	1	0.00354	0.256637	0.469027	0.727434	0.99646	0.00177	0.260177	0.515044	0.697345	0.99292	0.474336	0.118584	0.40708	0.058511	0.10461	0.005319	0.00177	0.315044	0.59115	0.842478	1	0.047788	0.189381	0.580531	0.697345	0.909735	0.00531	0.210619	0.39646	0.60531	0.980531	0.557522	0.35461	0.019469	0.256637	0.460177	0.637168	0.99292	0.341593
0.330425	0.385108	0.284468	0.237485	0.189173	0.223516	0.002909	0.237347	0.474113	0.725422	1	0.001163	0.280396	0.562536	0.803956	0.999418	0.000582	0.209424	0.452007	0.680628	0.997091	0.547411	0.162885	0.289703	0.068102	0.065774	0.00291	0.000582	0.311809	0.592787	0.826062	1	0.010471	0.379872	0.475276	0.651542	0.995346	0.001745	0.166376	0.300756	0.600349	0.990692	0.485166	0.369034	0.001745	0.197208	0.436882	0.665503	0.997091	0.37929
0.417112	0.352941	0.229947	0.311828	0.182796	0.123656	0.032086	0.304813	0.550802	0.786096	0.994652	0.010695	0.251337	0.55615	0.759358	1	0.005348	0.176471	0.326203	0.545455	0.893048	0.347594	0.342246	0.31016	0.129032	0.021505	0	0.005348	0.240642	0.427807	0.572193	1	0.010695	0.117647	0.256684	0.406417	0.625668	0.657754	0.727273	0.823529	0.898396	0.97861	0.31016	0.430108	0.010695	0.203209	0.385027	0.604278	0.909091	0.358289
0.307692	0.418269	0.274038	0.270531	0.130435	0.270531	0.028846	0.322115	0.543269	0.850962	1	0.009615	0.192308	0.418269	0.716346	0.990385	0.004808	0.240385	0.471154	0.682692	0.985577	0.514423	0.129808	0.355769	0.048309	0.10628	0	0.004808	0.173077	0.413462	0.860577	1	0.389423	0.427885	0.466346	0.668269	0.701923	0.019231	0.235577	0.596154	0.764423	0.956731	0.432692	0.347826	0.019231	0.399038	0.596154	0.735577	0.956731	0.403846
0.359223	0.349515	0.291262	0.303922	0.137255	0.205882	0.048544	0.174757	0.466019	0.728155	1	0.019417	0.300971	0.485437	0.708738	0.980583	0.009709	0.223301	0.514563	0.757282	0.961165	0.601942	0.106796	0.291262	0.078431	0.078431	0	0.009709	0.165049	0.368932	0.640777	1	0.126214	0.291262	0.320388	0.427184	0.61165	0.038835	0.533981	0.757282	0.825243	0.951456	0.378641	0.372549	0.038835	0.320388	0.553398	0.805825	0.961165	0.330097
0.318264	0.385172	0.296564	0.228261	0.199275	0.226449	0.01085	0.244123	0.468354	0.76311	0.994575	0.003617	0.253165	0.520796	0.759494	1	0.001808	0.240506	0.481013	0.712477	0.998192	0.481013	0.063291	0.455696	0.019928	0.077899	0.005435	0.001808	0.249548	0.636528	0.831826	1	0.056058	0.068716	0.206148	0.381555	0.942134	0.005425	0.305606	0.468354	0.650995	0.985533	0.533454	0.358696	0.007233	0.233273	0.471971	0.654611	0.990958	0.396022
0.32153	0.40085	0.27762	0.239716	0.191489	0.204255	0.002833	0.276204	0.525496	0.774788	0.997167	0.004249	0.216714	0.432011	0.720963	1	0.001416	0.273371	0.542493	0.752125	0.990085	0.562323	0.101983	0.335694	0.036879	0.087943	0.002837	0.001416	0.314448	0.502833	0.800283	1	0.157224	0.345609	0.750708	0.827195	0.917847	0.016997	0.194051	0.466006	0.651558	0.947592	0.477337	0.371631	0.016997	0.280453	0.5	0.752125	0.990085	0.439093
0.360208	0.388817	0.250975	0.277344	0.183594	0.19401	0.002601	0.218466	0.472042	0.778934	0.9987	0.006502	0.284785	0.504551	0.728218	0.996099	0.0013	0.273082	0.508453	0.73212	1	0.447334	0.214564	0.338101	0.083333	0.070312	0	0.0013	0.245774	0.53186	0.752926	1	0.006502	0.249675	0.485046	0.738622	0.985696	0.023407	0.254876	0.491547	0.717815	0.975293	0.397919	0.317708	0.003901	0.292588	0.504551	0.736021	0.997399	0.413524
0.299383	0.373457	0.32716	0.198142	0.198142	0.250774	0.006173	0.225309	0.518519	0.777778	0.990741	0.009259	0.259259	0.478395	0.712963	1	0.003086	0.231481	0.503086	0.75	0.993827	0.567901	0.197531	0.234568	0.086687	0.06192	0.012384	0.003086	0.287037	0.490741	0.759259	1	0.070988	0.268519	0.432099	0.567901	0.944444	0.021605	0.185185	0.62037	0.737654	0.885802	0.617284	0.315789	0.012346	0.253086	0.512346	0.731481	0.993827	0.376543
0.378947	0.305263	0.315789	0.265957	0.255319	0.159574	0.021053	0.252632	0.484211	0.768421	1	0.042105	0.242105	0.410526	0.642105	0.989474	0.010526	0.2	0.547368	0.821053	0.957895	0.326316	0.294737	0.378947	0.106383	0.06383	0.021277	0.010526	0.147368	0.463158	0.6	1	0.042105	0.105263	0.515789	0.652632	0.968421	0.168421	0.252632	0.547368	0.810526	0.936842	0.494737	0.425532	0.042105	0.2	0.505263	0.705263	0.957895	0.315789
0.364865	0.324324	0.310811	0.217687	0.238095	0.258503	0.040541	0.283784	0.533784	0.72973	1	0.02027	0.243243	0.459459	0.831081	0.993243	0.006757	0.175676	0.452703	0.662162	0.972973	0.432432	0.175676	0.391892	0.054422	0.068027	0	0.006757	0.358108	0.77027	0.878378	1	0.128378	0.162162	0.222973	0.317568	0.972973	0.033784	0.385135	0.533784	0.655405	0.756757	0.493243	0.408163	0.027027	0.162162	0.344595	0.621622	0.912162	0.324324
0.304239	0.448878	0.246883	0.2275	0.1525	0.2275	0.007481	0.304239	0.551122	0.775561	0.997506	0.009975	0.206983	0.438903	0.683292	0.985037	0.002494	0.244389	0.526185	0.795511	1	0.551122	0.084788	0.36409	0.055	0.075	0.01	0.002494	0.184539	0.531172	0.733167	1	0.029925	0.077307	0.798005	0.860349	0.937656	0.054863	0.289277	0.389027	0.665835	0.992519	0.553616	0.34	0.014963	0.256858	0.53616	0.700748	0.985037	0.428928
0.377323	0.29368	0.328996	0.227188	0.236499	0.216015	0.005576	0.249071	0.494424	0.728625	1	0.003717	0.230483	0.5	0.750929	0.994424	0.001859	0.254647	0.492565	0.756506	0.996283	0.364312	0.105948	0.52974	0.037244	0.096834	0	0.001859	0.217472	0.468401	0.633829	1	0.072491	0.386617	0.494424	0.929368	0.960967	0.037175	0.249071	0.557621	0.767658	0.992565	0.535316	0.372439	0.007435	0.226766	0.475836	0.715613	0.994424	0.258364
0.347426	0.290441	0.362132	0.174954	0.281768	0.198895	0.003676	0.28125	0.522059	0.775735	0.998162	0.007353	0.202206	0.465074	0.691176	1	0.001838	0.259191	0.514706	0.731618	0.992647	0.216912	0.022059	0.761029	0.005525	0.104972	0.001842	0.001838	0.222426	0.492647	0.737132	1	0.011029	0.014706	0.886029	0.891544	0.897059	0.020221	0.251838	0.503676	0.738971	0.992647	0.529412	0.441989	0.007353	0.262868	0.549632	0.751838	0.992647	0.268382
0.393443	0.352459	0.254098	0.280992	0.22314	0.165289	0.016393	0.245902	0.491803	0.811475	1	0.02459	0.262295	0.5	0.745902	0.991803	0.008197	0.188525	0.352459	0.639344	0.95082	0.5	0.5	0	0.198347	0	0	0.008197	0.327869	0.508197	0.803279	1	0.02459	0.204918	0.368852	0.639344	0.942623	0	0	0	0	0	0.409836	0.347107	0.032787	0.221311	0.516393	0.631148	0.95082	0.368852
0.403642	0.29742	0.298938	0.237082	0.212766	0.18541	0.004552	0.2261	0.482549	0.737481	0.990895	0.003035	0.233687	0.508346	0.778452	0.998483	0.001517	0.291351	0.505311	0.740516	1	0.509863	0.171472	0.318665	0.072948	0.06079	0	0.001517	0.224583	0.465857	0.770865	1	0.013657	0.233687	0.405159	0.585736	0.907436	0.047041	0.294385	0.599393	0.889226	0.992413	0.491654	0.325228	0.01214	0.280728	0.566009	0.799697	0.996965	0.306525
0.254777	0.503185	0.242038	0.24359	0.115385	0.237179	0.095541	0.522293	0.687898	0.859873	0.993631	0.012739	0.203822	0.426752	0.707006	1	0.006369	0.178344	0.407643	0.605096	0.929936	0.66879	0.165605	0.165605	0.083333	0.057692	0.00641	0.006369	0.248408	0.426752	0.694268	1	0.044586	0.165605	0.229299	0.496815	0.917197	0.363057	0.66879	0.751592	0.840764	0.88535	0.426752	0.320513	0.025478	0.216561	0.44586	0.624204	0.929936	0.528662
0.283978	0.447514	0.268508	0.21792	0.18031	0.220133	0.00884	0.232044	0.436464	0.674033	0.998895	0.003315	0.278453	0.59558	0.777901	0.996685	0.001105	0.227624	0.427624	0.687293	1	0.60663	0.124862	0.268508	0.063053	0.058628	0.003319	0.001105	0.303867	0.59116	0.776796	1	0.029834	0.19337	0.324862	0.470718	0.814365	0.00442	0.21326	0.38895	0.767956	0.956906	0.483978	0.435841	0.00442	0.296133	0.569061	0.775691	0.99116	0.443094
0.32439	0.346341	0.329268	0.200244	0.238095	0.234432	0.002439	0.273171	0.55122	0.787805	1	0.004878	0.218293	0.45122	0.709756	0.996341	0.00122	0.260976	0.507317	0.752439	0.99878	0.468293	0.242683	0.289024	0.107448	0.051282	0.002442	0.00122	0.210976	0.464634	0.740244	1	0.037805	0.202439	0.420732	0.80122	0.99878	0.006098	0.32439	0.541463	0.702439	0.992683	0.559756	0.398046	0.003659	0.265854	0.47439	0.74878	0.99878	0.371951
0.385542	0.289157	0.325301	0.231707	0.256098	0.146341	0.072289	0.313253	0.554217	0.759036	0.927711	0.060241	0.349398	0.638554	0.915663	1	0.012048	0.144578	0.277108	0.518072	0.843373	0.385542	0.313253	0.301205	0.121951	0.04878	0	0.012048	0.313253	0.481928	0.903614	1	0.024096	0.084337	0.240964	0.349398	0.506024	0.53012	0.590361	0.662651	0.771084	0.855422	0.349398	0.414634	0.024096	0.168675	0.385542	0.518072	0.915663	0.301205
0.34083	0.396194	0.262976	0.259965	0.162912	0.209705	0.010381	0.230104	0.472318	0.757785	0.99827	0.00346	0.269896	0.513841	0.743945	1	0.00173	0.233564	0.429066	0.740484	0.99654	0.539792	0.153979	0.306228	0.071057	0.081456	0.005199	0.00173	0.197232	0.50173	0.705882	1	0.00692	0.069204	0.401384	0.813149	0.99654	0.072664	0.288927	0.449827	0.754325	0.960208	0.50173	0.353553	0.008651	0.306228	0.451557	0.749135	0.99654	0.403114
0.294671	0.46395	0.241379	0.27044	0.147799	0.213836	0.009404	0.188088	0.470219	0.717868	1	0.00627	0.200627	0.45768	0.755486	0.996865	0.003135	0.360502	0.570533	0.777429	0.978056	0.489028	0.153605	0.357367	0.044025	0.069182	0	0.003135	0.122257	0.341693	0.69906	1	0.275862	0.423197	0.485893	0.658307	0.739812	0.184953	0.369906	0.586207	0.830721	0.968652	0.485893	0.358491	0.012539	0.322884	0.526646	0.702194	0.968652	0.460815
0.475309	0.345679	0.179012	0.343653	0.126935	0.145511	0.009259	0.209877	0.435185	0.746914	0.966049	0.006173	0.314815	0.555556	0.771605	0.993827	0.003086	0.354938	0.478395	0.694444	1	0.506173	0.092593	0.401235	0.043344	0.080495	0.006192	0.003086	0.228395	0.41358	0.694444	1	0.012346	0.083333	0.395062	0.484568	0.932099	0.015432	0.367284	0.611111	0.762346	0.987654	0.287037	0.278638	0.012346	0.410494	0.574074	0.712963	0.987654	0.37963
0.373434	0.358396	0.26817	0.233375	0.183187	0.196989	0.002506	0.250627	0.513784	0.753133	0.998747	0.007519	0.201754	0.451128	0.746867	1	0.001253	0.300752	0.502506	0.739348	0.997494	0.512531	0.116541	0.370927	0.046424	0.076537	0.003764	0.001253	0.129073	0.389724	0.710526	1	0.182957	0.365915	0.517544	0.672932	0.91604	0.053885	0.373434	0.615288	0.833333	0.991228	0.427318	0.311167	0.010025	0.313283	0.487469	0.720551	0.997494	0.383459
0.323944	0.338028	0.338028	0.229682	0.240283	0.201413	0.007042	0.302817	0.517606	0.795775	1	0.010563	0.235915	0.478873	0.721831	0.992958	0.003521	0.221831	0.492958	0.732394	0.989437	0.366197	0.172535	0.461268	0.04947	0.106007	0	0.003521	0.211268	0.471831	0.711268	1	0.112676	0.271127	0.40493	0.609155	0.700704	0.014085	0.242958	0.507042	0.809859	0.978873	0.549296	0.402827	0.024648	0.232394	0.471831	0.672535	0.989437	0.369718
0.345588	0.294118	0.360294	0.214815	0.251852	0.22963	0.022059	0.220588	0.455882	0.647059	1	0.014706	0.25	0.522059	0.801471	0.933824	0.007353	0.227941	0.463235	0.757353	0.992647	0.389706	0.330882	0.279412	0.17037	0.051852	0.007407	0.007353	0.338235	0.536765	0.713235	1	0.169118	0.411765	0.588235	0.808824	0.985294	0.036765	0.095588	0.235294	0.301471	0.904412	0.477941	0.459259	0.029412	0.257353	0.602941	0.786765	0.992647	0.294118
0.336694	0.540323	0.122984	0.335354	0.064646	0.119192	0.006048	0.227823	0.5	0.709677	0.997984	0.008065	0.294355	0.542339	0.754032	1	0.002016	0.080645	0.284274	0.77621	0.969758	0.889113	0.0625	0.048387	0.032323	0.016162	0	0.002016	0.3125	0.53629	0.760081	1	0.018145	0.072581	0.104839	0.157258	0.965726	0.042339	0.052419	0.122984	0.135081	0.945565	0.580645	0.339394	0.016129	0.326613	0.540323	0.747984	0.979839	0.493952
0.374813	0.388306	0.236882	0.288288	0.160661	0.171171	0.002999	0.209895	0.469265	0.73913	1	0.011994	0.266867	0.518741	0.770615	0.995502	0.001499	0.311844	0.547226	0.731634	0.997001	0.544228	0.127436	0.328336	0.046547	0.073574	0.007508	0.001499	0.151424	0.389805	0.767616	1	0.227886	0.457271	0.572714	0.709145	0.826087	0.004498	0.362819	0.56072	0.737631	0.98051	0.481259	0.327327	0.004498	0.310345	0.491754	0.667166	0.986507	0.433283
0.351156	0.375723	0.273121	0.267728	0.193922	0.195369	0.007225	0.192197	0.482659	0.734104	1	0.00578	0.291908	0.566474	0.819364	0.995665	0.001445	0.236994	0.465318	0.682081	0.998555	0.526012	0.137283	0.336705	0.050651	0.070912	0.004342	0.001445	0.16474	0.49711	0.867052	1	0.021676	0.346821	0.50289	0.621387	0.859827	0.004335	0.313584	0.495665	0.74422	0.945087	0.473988	0.335745	0.004335	0.264451	0.465318	0.682081	0.99422	0.398844
0.38125	0.425	0.19375	0.319415	0.14405	0.179541	0.008333	0.241667	0.522917	0.745833	0.997917	0.00625	0.24375	0.466667	0.785417	1	0.002083	0.2625	0.464583	0.689583	0.975	0.604167	0.122917	0.272917	0.056367	0.08977	0.002088	0.002083	0.2125	0.41875	0.7625	1	0.01875	0.139583	0.275	0.570833	0.70625	0.0375	0.460417	0.63125	0.79375	0.977083	0.466667	0.338205	0.01875	0.297917	0.535417	0.74375	0.985417	0.452083
0.284615	0.369231	0.346154	0.209302	0.232558	0.255814	0.038462	0.276923	0.476923	0.715385	1	0.015385	0.238462	0.538462	0.792308	0.992308	0.007692	0.215385	0.461538	0.661538	0.969231	0.569231	0.369231	0.061538	0.131783	0.054264	0.007752	0.007692	0.361538	0.676923	0.838462	1	0.023077	0.138462	0.338462	0.6	0.807692	0.284615	0.292308	0.315385	0.430769	0.946154	0.423077	0.449612	0.023077	0.2	0.446154	0.676923	0.969231	0.361538
0.388298	0.340426	0.271277	0.261333	0.210667	0.165333	0.007979	0.319149	0.510638	0.771277	1	0.005319	0.239362	0.473404	0.718085	0.992021	0.00266	0.18883	0.56117	0.74734	0.99734	0.523936	0.180851	0.295213	0.104	0.066667	0.002667	0.00266	0.337766	0.529255	0.792553	1	0.148936	0.582447	0.702128	0.784574	0.981383	0.007979	0.114362	0.255319	0.462766	0.885638	0.412234	0.336	0.010638	0.204787	0.569149	0.744681	0.99734	0.37766
0.414269	0.357883	0.227848	0.275346	0.15553	0.172811	0.009206	0.30725	0.591484	0.818182	0.998849	0.002301	0.216341	0.504028	0.735328	1	0.001151	0.207135	0.365938	0.555811	0.995397	0.513234	0.113924	0.372842	0.043779	0.085253	0.006912	0.001151	0.296893	0.573072	0.736479	1	0.04603	0.188723	0.322209	0.448792	0.904488	0.013809	0.247411	0.483314	0.777906	0.996548	0.410817	0.31106	0.011507	0.209436	0.38435	0.703107	0.995397	0.43038
0.469945	0.202186	0.327869	0.186813	0.313187	0.131868	0.016393	0.322404	0.595628	0.819672	1	0.010929	0.245902	0.387978	0.650273	0.983607	0.005464	0.163934	0.448087	0.628415	0.989071	0.295082	0.234973	0.469945	0.076923	0.087912	0.010989	0.005464	0.180328	0.393443	0.639344	1	0.021858	0.202186	0.377049	0.546448	0.775956	0.043716	0.327869	0.672131	0.868852	0.989071	0.442623	0.384615	0.021858	0.196721	0.409836	0.628415	0.989071	0.262295
0.38746	0.342444	0.270096	0.256039	0.247987	0.175523	0.004823	0.22508	0.488746	0.747588	1	0.003215	0.284566	0.533762	0.755627	0.996785	0.001608	0.228296	0.474277	0.729904	0.995177	0.379421	0.036977	0.583601	0.020934	0.059581	0.00161	0.001608	0.233119	0.59164	0.869775	1	0.118971	0.35209	0.432476	0.824759	0.885852	0.030547	0.249196	0.477492	0.667203	0.9791	0.442122	0.386473	0.022508	0.247588	0.491961	0.696141	0.993569	0.368167
0.34188	0.32906	0.32906	0.236052	0.236052	0.240343	0.025641	0.299145	0.508547	0.75641	0.995726	0.008547	0.15812	0.461538	0.679487	1	0.004274	0.252137	0.470085	0.747863	0.991453	0.461538	0.376068	0.162393	0.137339	0.034335	0	0.004274	0.153846	0.495726	0.75641	1	0.115385	0.444444	0.606838	0.82906	0.978632	0.025641	0.17094	0.213675	0.260684	0.512821	0.525641	0.377682	0.017094	0.277778	0.521368	0.764957	0.978632	0.299145
0.356265	0.298526	0.345209	0.204182	0.254613	0.236162	0.002457	0.283784	0.540541	0.760442	1	0.004914	0.237101	0.455774	0.732187	0.995086	0.001229	0.22973	0.495086	0.735872	0.997543	0.465602	0.248157	0.286241	0.098401	0.059041	0.00246	0.001229	0.210074	0.469287	0.749386	1	0.038084	0.202703	0.423833	0.793612	0.997543	0.006143	0.318182	0.556511	0.707617	0.9914	0.563882	0.398524	0.003686	0.271499	0.484029	0.743243	0.997543	0.332924
0.377301	0.325153	0.297546	0.230769	0.24	0.193846	0.006135	0.193252	0.466258	0.708589	1	0.039877	0.349693	0.576687	0.779141	0.996933	0.003067	0.236196	0.444785	0.693252	0.978528	0.53681	0.263804	0.199387	0.104615	0.055385	0.012308	0.003067	0.251534	0.466258	0.754601	1	0.042945	0.312883	0.555215	0.702454	0.935583	0.067485	0.138037	0.503067	0.846626	0.98773	0.503067	0.356923	0.042945	0.343558	0.527607	0.757669	0.978528	0.315951
0.300752	0.330827	0.368421	0.212121	0.181818	0.242424	0.045113	0.263158	0.443609	0.646617	0.954887	0.015038	0.225564	0.578947	0.774436	0.947368	0.007519	0.24812	0.458647	0.744361	1	0.353383	0.360902	0.285714	0.174242	0.05303	0.007576	0.007519	0.330827	0.56391	0.729323	1	0.18797	0.398496	0.541353	0.81203	0.992481	0.037594	0.097744	0.255639	0.323308	0.917293	0.466165	0.424242	0.030075	0.233083	0.556391	0.789474	0.992481	0.293233
0.295082	0.327869	0.377049	0.197802	0.258242	0.274725	0.016393	0.245902	0.47541	0.73224	1	0.038251	0.196721	0.469945	0.704918	0.983607	0.005464	0.273224	0.513661	0.786885	0.994536	0.409836	0.480874	0.10929	0.142857	0.032967	0	0.005464	0.213115	0.535519	0.825137	1	0.016393	0.349727	0.530055	0.721311	0.994536	0.092896	0.114754	0.256831	0.284153	0.759563	0.453552	0.494505	0.021858	0.26776	0.497268	0.748634	0.994536	0.387978
0.295082	0.352459	0.352459	0.194521	0.227397	0.243836	0.016393	0.20765	0.540984	0.756831	0.997268	0.005464	0.26776	0.453552	0.674863	0.991803	0.002732	0.251366	0.513661	0.762295	1	0.404372	0.128415	0.467213	0.063014	0.079452	0.00274	0.002732	0.270492	0.494536	0.655738	1	0.010929	0.068306	0.513661	0.931694	0.986339	0.092896	0.245902	0.483607	0.743169	0.893443	0.63388	0.334247	0.010929	0.26776	0.491803	0.724044	0.991803	0.42623
0.325279	0.330855	0.343866	0.212291	0.208566	0.264432	0.003717	0.202602	0.44052	0.672862	0.996283	0.007435	0.273234	0.539033	0.769517	0.992565	0.001859	0.258364	0.522305	0.767658	1	0.414498	0.072491	0.513011	0.031657	0.094972	0.001862	0.001859	0.262082	0.574349	0.79368	1	0.042751	0.087361	0.765799	0.86803	0.964684	0.007435	0.234201	0.436803	0.6171	0.992565	0.581784	0.387337	0.009294	0.245353	0.520446	0.767658	0.992565	0.355019
0.314251	0.382306	0.303443	0.224269	0.203044	0.24189	0.000801	0.254604	0.504404	0.748599	1	0.001601	0.242594	0.489592	0.734988	0.9996	0.0004	0.252602	0.505204	0.771817	0.997998	0.48799	0.180144	0.331865	0.074089	0.067681	0.006808	0.0004	0.270616	0.520817	0.724179	1	0.002002	0.210568	0.368295	0.652522	0.997998	0.006005	0.255004	0.545236	0.835869	0.995196	0.540032	0.387665	0.001601	0.244596	0.48799	0.76221	0.998399	0.400721
0.334365	0.331269	0.334365	0.22314	0.231405	0.245868	0.004128	0.214654	0.480908	0.726522	0.998968	0.008256	0.257998	0.522188	0.75645	0.992776	0.001032	0.260062	0.49742	0.762642	1	0.465428	0.224974	0.309598	0.083678	0.069215	0.005165	0.001032	0.220846	0.449948	0.657379	1	0.003096	0.216718	0.499484	0.675955	0.988648	0.038184	0.293086	0.608875	0.816305	0.996904	0.561404	0.380165	0.007224	0.30031	0.54902	0.77709	0.996904	0.345717
0.417391	0.243478	0.33913	0.192982	0.307018	0.157895	0.017391	0.2	0.469565	0.713043	1	0.052174	0.46087	0.634783	0.852174	0.982609	0.008696	0.182609	0.391304	0.669565	0.991304	0.408696	0.243478	0.347826	0.105263	0.070175	0	0.008696	0.182609	0.46087	0.634783	1	0.2	0.286957	0.391304	0.478261	0.565217	0.078261	0.156522	0.721739	0.843478	0.965217	0.417391	0.491228	0.034783	0.26087	0.486957	0.730435	0.956522	0.278261
0.338742	0.35497	0.306288	0.227642	0.195122	0.215447	0.008114	0.269777	0.537525	0.770791	0.995943	0.010142	0.298174	0.525355	0.750507	0.997972	0.002028	0.156187	0.40568	0.713996	1	0.46856	0.125761	0.40568	0.050813	0.103659	0.006098	0.002028	0.25355	0.614604	0.8357	1	0.004057	0.085193	0.31643	0.490872	0.975659	0.05071	0.275862	0.496957	0.636917	0.914807	0.513185	0.406504	0.006085	0.206897	0.413793	0.616633	0.993915	0.389452
0.388158	0.282895	0.328947	0.208791	0.261538	0.18022	0.004386	0.256579	0.508772	0.780702	0.997807	0.017544	0.22807	0.482456	0.717105	1	0.002193	0.258772	0.486842	0.734649	0.995614	0.385965	0.184211	0.429825	0.076923	0.09011	0.002198	0.002193	0.298246	0.513158	0.758772	1	0.100877	0.254386	0.526316	0.774123	0.949561	0.006579	0.199561	0.440789	0.701754	0.989035	0.541667	0.408791	0.006579	0.267544	0.482456	0.717105	0.995614	0.285088
0.41573	0.404494	0.179775	0.340909	0.170455	0.113636	0.022472	0.179775	0.370787	0.696629	1	0.05618	0.337079	0.516854	0.752809	0.988764	0.011236	0.202247	0.561798	0.741573	0.966292	0.157303	0	0.842697	0	0.068182	0	0.011236	0.033708	0.719101	0.752809	1	0	0	0	0	0	0.044944	0.235955	0.449438	0.685393	0.966292	0.325843	0.409091	0.067416	0.382022	0.550562	0.741573	0.966292	0.370787
0.291405	0.395528	0.313068	0.228671	0.18951	0.246853	0.004193	0.30608	0.520615	0.762404	0.995807	0.001398	0.238994	0.51153	0.735849	0.998602	0.000699	0.228512	0.454228	0.748428	1	0.538784	0.374563	0.086653	0.11958	0.031469	0.006294	0.000699	0.255066	0.508036	0.716981	1	0.019567	0.236198	0.469602	0.75891	0.937806	0.002795	0.17051	0.590496	0.960867	0.998602	0.591195	0.28951	0.002795	0.238994	0.482879	0.763103	0.997904	0.42348
0.273196	0.453608	0.273196	0.21447	0.178295	0.245478	0.023196	0.201031	0.487113	0.657216	0.997423	0.005155	0.322165	0.559278	0.798969	0.994845	0.002577	0.208763	0.425258	0.734536	1	0.600515	0.092784	0.306701	0.03876	0.059432	0.007752	0.002577	0.280928	0.463918	0.791237	1	0.033505	0.118557	0.402062	0.572165	0.992268	0.048969	0.257732	0.626289	0.703608	0.974227	0.536082	0.377261	0.012887	0.257732	0.414948	0.739691	0.992268	0.466495
0.317647	0.405882	0.276471	0.280236	0.179941	0.221239	0.011765	0.223529	0.523529	0.741176	0.997059	0.005882	0.226471	0.473529	0.697059	0.991176	0.002941	0.273529	0.564706	0.785294	1	0.482353	0.076471	0.441176	0.044248	0.085546	0.00295	0.002941	0.15	0.538235	0.797059	1	0.035294	0.129412	0.611765	0.952941	0.988235	0.082353	0.308824	0.467647	0.702941	0.908824	0.473529	0.39528	0.029412	0.282353	0.479412	0.732353	0.970588	0.444118
0.307407	0.333333	0.359259	0.193309	0.230483	0.215613	0.007407	0.214815	0.47037	0.762963	0.996296	0.011111	0.225926	0.459259	0.714815	0.992593	0.003704	0.262963	0.514815	0.759259	1	0.511111	0.255556	0.233333	0.089219	0.05948	0	0.003704	0.207407	0.414815	0.722222	1	0.17037	0.27037	0.551852	0.774074	0.914815	0.051852	0.111111	0.5	0.82963	0.992593	0.537037	0.342007	0.014815	0.337037	0.548148	0.759259	0.985185	0.385185
0.434555	0.356021	0.209424	0.335958	0.160105	0.15748	0.007853	0.267016	0.486911	0.730366	1	0.005236	0.269634	0.554974	0.740838	0.997382	0.002618	0.175393	0.390052	0.753927	0.994764	0.725131	0.086387	0.188482	0.031496	0.068241	0.010499	0.002618	0.209424	0.429319	0.667539	1	0.235602	0.298429	0.649215	0.798429	0.984293	0.099476	0.510471	0.696335	0.856021	0.989529	0.329843	0.278215	0.028796	0.240838	0.5	0.743455	0.994764	0.387435
0.403226	0.306452	0.290323	0.227642	0.211382	0.195122	0.024194	0.16129	0.427419	0.701613	0.991935	0.016129	0.233871	0.540323	0.741935	0.975806	0.008065	0.258065	0.556452	0.782258	1	0.274194	0	0.725806	0	0.081301	0	0.008065	0.177419	0.596774	0.741935	1	0	0	0	0	0	0.064516	0.290323	0.475806	0.709677	0.959677	0.427419	0.471545	0.032258	0.322581	0.524194	0.75	0.967742	0.25
0.375	0.291667	0.333333	0.197605	0.299401	0.209581	0.017857	0.25	0.52381	0.77381	1	0.029762	0.196429	0.428571	0.702381	0.958333	0.005952	0.279762	0.535714	0.755952	0.988095	0.404762	0.261905	0.333333	0.095808	0.05988	0.011976	0.005952	0.136905	0.404762	0.660714	1	0.089286	0.47619	0.720238	0.815476	0.892857	0.154762	0.25	0.505952	0.589286	0.982143	0.410714	0.431138	0.029762	0.279762	0.517857	0.702381	0.982143	0.27381
0.385185	0.348148	0.266667	0.260223	0.185874	0.189591	0.018519	0.307407	0.488889	0.803704	0.988889	0.007407	0.181481	0.448148	0.711111	1	0.003704	0.207407	0.540741	0.718519	0.996296	0.611111	0.277778	0.111111	0.115242	0.048327	0.003717	0.003704	0.244444	0.444444	0.77037	1	0.062963	0.522222	0.644444	0.751852	0.896296	0.014815	0.037037	0.377778	0.433333	0.992593	0.366667	0.356877	0.014815	0.162963	0.42963	0.674074	0.9	0.366667
0.375723	0.323699	0.300578	0.209302	0.226744	0.186047	0.011561	0.283237	0.462428	0.716763	1	0.075145	0.242775	0.554913	0.797688	0.976879	0.00578	0.225434	0.468208	0.728324	0.99422	0.352601	0.254335	0.393064	0.098837	0.063953	0.017442	0.00578	0.190751	0.520231	0.693642	1	0.023121	0.219653	0.531792	0.774566	0.855491	0.052023	0.294798	0.393064	0.710983	0.99422	0.346821	0.418605	0.028902	0.184971	0.479769	0.705202	0.901734	0.33526
0.386777	0.366942	0.246281	0.254967	0.165563	0.167219	0.009917	0.327273	0.560331	0.735537	0.990083	0.003306	0.221488	0.519008	0.803306	1	0.001653	0.18843	0.416529	0.628099	0.998347	0.619835	0.152066	0.228099	0.059603	0.062914	0	0.001653	0.261157	0.566942	0.743802	1	0.003306	0.161983	0.284298	0.522314	0.973554	0.036364	0.358678	0.505785	0.833058	0.995041	0.429752	0.304636	0.004959	0.191736	0.447934	0.852893	0.993388	0.428099
0.354037	0.515528	0.130435	0.45625	0.06875	0.15625	0.018634	0.329193	0.627329	0.782609	0.981366	0.012422	0.204969	0.453416	0.732919	0.993789	0.006211	0.136646	0.360248	0.490683	1	1	0	0	0	0	0	0.006211	0.248447	0.496894	0.745342	1	0	0	0	0	0	0	0	0	0	0	0.291925	0.475	0.031056	0.198758	0.453416	0.714286	0.956522	0.552795
0.349034	0.30314	0.347826	0.200726	0.243047	0.229746	0.002415	0.248792	0.486715	0.7343	1	0.003623	0.258454	0.492754	0.745169	0.992754	0.001208	0.227053	0.503623	0.76087	0.998792	0.477053	0.2343	0.288647	0.099154	0.053204	0.002418	0.001208	0.204106	0.431159	0.733092	1	0.043478	0.205314	0.443237	0.806763	0.998792	0.013285	0.352657	0.561594	0.724638	0.992754	0.561594	0.406288	0.004831	0.256039	0.481884	0.742754	0.998792	0.31401
0.259542	0.381679	0.358779	0.215385	0.215385	0.284615	0.022901	0.167939	0.412214	0.618321	0.954198	0.015267	0.274809	0.610687	0.80916	1	0.007634	0.244275	0.465649	0.732824	0.992366	0.381679	0.343511	0.274809	0.176923	0.053846	0.007692	0.007634	0.328244	0.549618	0.717557	1	0.175573	0.381679	0.580153	0.80916	0.992366	0.038168	0.099237	0.251908	0.687023	0.916031	0.48855	0.430769	0.030534	0.267176	0.580153	0.78626	0.992366	0.335878
0.323232	0.358586	0.318182	0.218274	0.218274	0.233503	0.040404	0.353535	0.585859	0.79798	0.964646	0.010101	0.151515	0.424242	0.686869	1	0.005051	0.232323	0.454545	0.707071	0.979798	0.510101	0.348485	0.141414	0.126904	0.045685	0.005076	0.005051	0.176768	0.429293	0.717172	1	0.237374	0.419192	0.555556	0.757576	0.984848	0.015152	0.045455	0.287879	0.89899	0.959596	0.388889	0.385787	0.020202	0.252525	0.520202	0.691919	0.979798	0.363636
0.380645	0.322581	0.296774	0.230603	0.256466	0.18319	0.008602	0.283871	0.522581	0.772043	0.963441	0.015054	0.24086	0.47957	0.733333	0.997849	0.002151	0.217204	0.494624	0.737634	1	0.354839	0.083871	0.56129	0.032328	0.092672	0.002155	0.002151	0.286022	0.537634	0.789247	1	0.210753	0.27957	0.395699	0.516129	0.597849	0.004301	0.178495	0.486022	0.731183	0.954839	0.541935	0.405172	0.006452	0.260215	0.48172	0.703226	0.995699	0.412903
0.384988	0.336562	0.27845	0.228155	0.208738	0.196602	0.004843	0.254237	0.440678	0.7046	0.990315	0.014528	0.244552	0.539952	0.767554	1	0.002421	0.234867	0.501211	0.774818	0.992736	0.476998	0.133172	0.389831	0.048544	0.072816	0.004854	0.002421	0.251816	0.566586	0.801453	1	0.094431	0.53753	0.670702	0.830508	0.932203	0.029056	0.186441	0.358354	0.501211	0.895884	0.401937	0.398058	0.009685	0.280872	0.527845	0.765133	0.992736	0.338983
0.453202	0.344828	0.20197	0.30198	0.20297	0.128713	0.009852	0.270936	0.536946	0.753695	0.995074	0.019704	0.211823	0.507389	0.783251	1	0.004926	0.261084	0.428571	0.576355	0.990148	0.536946	0.128079	0.334975	0.074257	0.064356	0.00495	0.004926	0.216749	0.374384	0.788177	1	0.108374	0.339901	0.522167	0.655172	0.862069	0.019704	0.389163	0.571429	0.748768	0.985222	0.330049	0.366337	0.019704	0.20197	0.44335	0.581281	0.985222	0.344828
0.269355	0.485484	0.245161	0.26979	0.135703	0.263328	0.009677	0.224194	0.493548	0.746774	1	0.003226	0.279032	0.506452	0.756452	0.998387	0.001613	0.203226	0.483871	0.724194	0.995161	0.670968	0.082258	0.246774	0.029079	0.048465	0.003231	0.001613	0.359677	0.541935	0.790323	1	0.1	0.654839	0.717742	0.795161	0.859677	0.003226	0.072581	0.180645	0.333871	0.877419	0.446774	0.390953	0.004839	0.235484	0.559677	0.785484	0.987097	0.495161
0.359736	0.330033	0.310231	0.261589	0.192053	0.241722	0.013201	0.264026	0.452145	0.759076	1	0.006601	0.254125	0.544554	0.735974	0.993399	0.0033	0.221122	0.514851	0.726073	0.980198	0.491749	0.181518	0.326733	0.069536	0.076159	0.009934	0.0033	0.30033	0.518152	0.772277	1	0.059406	0.125413	0.570957	0.775578	0.943894	0.023102	0.237624	0.462046	0.712871	0.966997	0.429043	0.397351	0.016502	0.214521	0.438944	0.693069	0.993399	0.382838
0.404	0.284	0.312	0.212851	0.261044	0.192771	0.012	0.244	0.444	0.748	0.988	0.008	0.252	0.592	0.776	1	0.004	0.228	0.464	0.696	0.98	0.484	0.208	0.308	0.072289	0.032129	0	0.004	0.264	0.708	0.876	1	0.04	0.232	0.412	0.628	0.828	0.112	0.184	0.476	0.552	0.692	0.516	0.401606	0.02	0.228	0.48	0.684	0.98	0.284
0.465347	0.217822	0.316832	0.18	0.29	0.1	0.029703	0.277228	0.544554	0.782178	1	0.128713	0.168317	0.316832	0.60396	0.841584	0.009901	0.237624	0.514851	0.742574	0.990099	0.425743	0.287129	0.287129	0.12	0.06	0	0.009901	0.178218	0.643564	0.792079	1	0.29703	0.544554	0.613861	0.821782	0.950495	0.049505	0.108911	0.237624	0.435644	0.514851	0.376238	0.4	0.079208	0.178218	0.465347	0.613861	0.960396	0.188119
0.363636	0.290909	0.345455	0.259259	0.314815	0.222222	0.036364	0.272727	0.490909	0.745455	1	0.145455	0.254545	0.527273	0.690909	0.890909	0.018182	0.109091	0.418182	0.781818	0.963636	0.418182	0.236364	0.345455	0.092593	0.074074	0	0.109091	0.181818	0.472727	0.654545	1	0.018182	0.054545	0.563636	0.618182	0.981818	0.254545	0.309091	0.4	0.745455	0.836364	0.327273	0.444444	0.054545	0.290909	0.454545	0.8	0.963636	0.309091
0.297872	0.421986	0.280142	0.225577	0.154529	0.273535	0.015957	0.255319	0.478723	0.822695	0.994681	0.003546	0.218085	0.5	0.675532	1	0.001773	0.278369	0.52305	0.776596	0.996454	0.601064	0.184397	0.214539	0.092362	0.053286	0	0.001773	0.281915	0.578014	0.730496	1	0.005319	0.242908	0.41844	0.835106	0.978723	0.033688	0.18617	0.384752	0.803191	0.985816	0.531915	0.273535	0.007092	0.27305	0.542553	0.723404	0.987589	0.434397
0.359551	0.292135	0.348315	0.204545	0.295455	0.204545	0.022472	0.213483	0.561798	0.696629	0.988764	0.033708	0.280899	0.494382	0.808989	0.966292	0.011236	0.179775	0.438202	0.730337	1	0.460674	0.483146	0.05618	0.136364	0.022727	0	0.011236	0.235955	0.561798	0.797753	1	0.168539	0.314607	0.494382	0.730337	0.988764	0.067416	0.067416	0.078652	0.089888	0.11236	0.483146	0.272727	0.044944	0.213483	0.426966	0.741573	0.876404	0.370787
0.386364	0.378788	0.234848	0.267176	0.160305	0.152672	0.037879	0.30303	0.560606	0.780303	0.992424	0.045455	0.25	0.537879	0.787879	1	0.007576	0.098485	0.310606	0.530303	0.833333	0.469697	0.19697	0.333333	0.061069	0.045802	0.015267	0.007576	0.295455	0.469697	0.878788	1	0.015152	0.212121	0.424242	0.5	0.818182	0.05303	0.128788	0.590909	0.674242	0.80303	0.310606	0.274809	0.022727	0.181818	0.416667	0.590909	0.863636	0.378788
0.452941	0.344118	0.202941	0.300885	0.159292	0.129794	0.008824	0.188235	0.479412	0.732353	0.994118	0.005882	0.255882	0.5	0.8	0.991176	0.002941	0.367647	0.532353	0.714706	1	0.485294	0.041176	0.473529	0.023599	0.070796	0	0.002941	0.191176	0.311765	0.605882	1	0.367647	0.373529	0.45	0.532353	0.847059	0.011765	0.405882	0.661765	0.779412	0.997059	0.285294	0.306785	0.017647	0.373529	0.535294	0.670588	0.997059	0.414706
0.410909	0.381818	0.207273	0.29927	0.211679	0.149635	0.014545	0.250909	0.48	0.72	0.981818	0.007273	0.192727	0.436364	0.723636	1	0.003636	0.363636	0.607273	0.781818	0.996364	0.727273	0.036364	0.236364	0.021898	0.072993	0	0.003636	0.181818	0.432727	0.767273	1	0.807273	0.810909	0.872727	0.898182	0.909091	0.250909	0.356364	0.523636	0.661818	0.978182	0.243636	0.357664	0.010909	0.276364	0.549091	0.778182	0.985455	0.432727
0.27381	0.375	0.35119	0.209581	0.161677	0.251497	0.041667	0.214286	0.440476	0.64881	0.964286	0.011905	0.244048	0.5	0.821429	1	0.005952	0.267857	0.535714	0.72619	0.994048	0.35119	0.017857	0.630952	0.011976	0.083832	0.011976	0.005952	0.095238	0.339286	0.797619	1	0.077381	0.077381	0.077381	0.083333	0.720238	0.119048	0.303571	0.535714	0.744048	0.940476	0.52381	0.39521	0.02381	0.267857	0.535714	0.744048	0.994048	0.428571
0.427184	0.330097	0.242718	0.303922	0.127451	0.176471	0.029126	0.165049	0.339806	0.621359	0.873786	0.019417	0.223301	0.582524	0.796117	1	0.009709	0.38835	0.563107	0.786408	0.990291	0.679612	0.029126	0.291262	0.039216	0.058824	0	0.009709	0.194175	0.368932	0.640777	1	0.446602	0.446602	0.446602	0.456311	0.631068	0.048544	0.533981	0.757282	0.825243	0.902913	0.320388	0.333333	0.359223	0.504854	0.650485	0.825243	0.941748	0.359223
0.341297	0.320819	0.337884	0.219178	0.236301	0.212329	0.010239	0.180887	0.47099	0.709898	1	0.047782	0.327645	0.525597	0.740614	0.982935	0.003413	0.211604	0.484642	0.788396	0.993174	0.34471	0.12628	0.52901	0.047945	0.082192	0.006849	0.003413	0.290102	0.505119	0.795222	1	0.296928	0.406143	0.706485	0.808874	0.938567	0.006826	0.167235	0.443686	0.665529	0.976109	0.556314	0.40411	0.006826	0.307167	0.522184	0.754266	0.982935	0.337884
0.4	0.27907	0.32093	0.214953	0.247664	0.205607	0.023256	0.260465	0.539535	0.813953	1	0.013953	0.209302	0.460465	0.702326	0.948837	0.004651	0.251163	0.497674	0.711628	0.962791	0.446512	0.386047	0.167442	0.135514	0.060748	0.004673	0.004651	0.311628	0.6	0.813953	1	0.009302	0.27907	0.446512	0.623256	0.962791	0.069767	0.204651	0.246512	0.753488	0.930233	0.44186	0.392523	0.009302	0.232558	0.44186	0.67907	0.962791	0.297674
0.394286	0.285714	0.32	0.212644	0.229885	0.224138	0.028571	0.234286	0.531429	0.811429	1	0.022857	0.24	0.497143	0.731429	0.982857	0.005714	0.251429	0.474286	0.725714	0.988571	0.377143	0.268571	0.354286	0.074713	0.074713	0.017241	0.005714	0.2	0.411429	0.588571	1	0.177143	0.297143	0.468571	0.76	0.845714	0.028571	0.125714	0.628571	0.897143	0.988571	0.468571	0.287356	0.017143	0.257143	0.457143	0.657143	0.965714	0.268571
0.340426	0.326241	0.333333	0.25	0.207143	0.235714	0.014184	0.269504	0.475177	0.64539	0.957447	0.021277	0.212766	0.524823	0.77305	0.985816	0.007092	0.219858	0.468085	0.794326	1	0.411348	0.319149	0.269504	0.15	0.05	0.007143	0.007092	0.22695	0.546099	0.702128	1	0.198582	0.446809	0.609929	0.822695	0.992908	0.070922	0.12766	0.262411	0.326241	0.921986	0.489362	0.414286	0.035461	0.234043	0.496454	0.787234	0.992908	0.347518
0.37037	0.417989	0.21164	0.324468	0.117021	0.164894	0.068783	0.322751	0.62963	0.825397	1	0.010582	0.26455	0.52381	0.761905	0.984127	0.005291	0.142857	0.301587	0.460317	0.925926	0.677249	0.174603	0.148148	0.06383	0.06383	0.010638	0.005291	0.301587	0.582011	0.793651	1	0.153439	0.232804	0.386243	0.460317	0.613757	0.084656	0.132275	0.42328	0.724868	0.878307	0.365079	0.276596	0.026455	0.201058	0.380952	0.470899	0.925926	0.455026
0.453782	0.369748	0.176471	0.297335	0.15007	0.134642	0.004202	0.2493	0.415966	0.689076	1	0.007003	0.184874	0.54902	0.809524	0.995798	0.001401	0.383754	0.561625	0.746499	0.998599	0.661064	0.180672	0.158263	0.091164	0.057504	0.004208	0.001401	0.205882	0.396359	0.731092	1	0.004202	0.39916	0.588235	0.77451	0.906162	0.110644	0.455182	0.619048	0.7507	0.910364	0.364146	0.2777	0.005602	0.464986	0.645658	0.858543	0.985994	0.432773
0.385965	0.280702	0.333333	0.19469	0.238938	0.19469	0.04386	0.210526	0.491228	0.701754	1	0.026316	0.368421	0.614035	0.789474	0.991228	0.008772	0.175439	0.429825	0.710526	0.973684	0.385965	0.166667	0.447368	0.044248	0.097345	0.00885	0.008772	0.192982	0.350877	0.692982	1	0.263158	0.289474	0.394737	0.438596	0.745614	0.061404	0.447368	0.578947	0.859649	0.973684	0.429825	0.371681	0.035088	0.315789	0.535088	0.719298	0.973684	0.307018
0.254464	0.428571	0.316964	0.188341	0.170404	0.242152	0.013393	0.330357	0.59375	0.78125	0.986607	0.008929	0.183036	0.415179	0.683036	0.950893	0.004464	0.227679	0.549107	0.772321	1	0.5	0.178571	0.321429	0.058296	0.085202	0.004484	0.004464	0.142857	0.330357	0.633929	1	0.026786	0.339286	0.5625	0.620536	0.9375	0.09375	0.495536	0.6875	0.870536	0.991071	0.459821	0.466368	0.022321	0.245536	0.473214	0.6875	0.991071	0.473214
0.297483	0.359268	0.343249	0.194954	0.197248	0.21789	0.016018	0.299771	0.540046	0.782609	1	0.004577	0.19222	0.448513	0.709382	0.988558	0.002288	0.258581	0.501144	0.759725	0.997712	0.432494	0.162471	0.405034	0.052752	0.084862	0.002294	0.002288	0.203661	0.405034	0.684211	1	0.128146	0.356979	0.533181	0.87643	0.997712	0.01373	0.221968	0.560641	0.791762	0.965675	0.569794	0.302752	0.016018	0.263158	0.466819	0.732265	0.995423	0.372998
0.304167	0.358333	0.3375	0.179916	0.225941	0.263598	0.0375	0.341667	0.575	0.820833	1	0.008333	0.1875	0.3875	0.604167	0.983333	0.004167	0.295833	0.541667	0.741667	0.9875	0.479167	0.358333	0.1625	0.133891	0.025105	0	0.004167	0.25	0.458333	0.666667	1	0.0125	0.166667	0.325	0.554167	0.816667	0.720833	0.841667	0.883333	0.9375	0.979167	0.579167	0.317992	0.0125	0.270833	0.495833	0.7375	0.9875	0.404167
0.425676	0.256757	0.317568	0.183673	0.29932	0.129252	0.013514	0.25	0.412162	0.702703	1	0.087838	0.243243	0.547297	0.675676	0.986486	0.006757	0.202703	0.533784	0.790541	0.993243	0.391892	0.297297	0.310811	0.142857	0.061224	0.006803	0.006757	0.155405	0.5	0.736486	1	0.013514	0.243243	0.614865	0.885135	0.97973	0.060811	0.310811	0.391892	0.648649	0.824324	0.391892	0.47619	0.02027	0.202703	0.533784	0.743243	0.972973	0.304054
0.364094	0.336409	0.299497	0.225021	0.207389	0.214945	0.002517	0.213926	0.472315	0.745805	1	0.001678	0.246644	0.511745	0.732383	0.997483	0.000839	0.290268	0.538591	0.77349	0.993289	0.416107	0.156879	0.427013	0.055416	0.078925	0.001679	0.000839	0.202181	0.473993	0.744128	1	0.003356	0.315436	0.462248	0.59396	0.908557	0.006711	0.265101	0.529362	0.759228	0.987416	0.505872	0.327456	0.008389	0.32802	0.543624	0.765101	0.990772	0.360738
0.394366	0.29108	0.314554	0.264151	0.287736	0.169811	0.00939	0.276995	0.549296	0.798122	1	0.014085	0.225352	0.431925	0.70892	0.981221	0.004695	0.253521	0.502347	0.704225	0.995305	0.492958	0.244131	0.262911	0.09434	0.066038	0	0.004695	0.220657	0.469484	0.694836	1	0.046948	0.201878	0.394366	0.652582	0.849765	0.103286	0.305164	0.596244	0.892019	0.957746	0.403756	0.349057	0.042254	0.239437	0.511737	0.704225	0.99061	0.295775
0.360153	0.426564	0.213282	0.299233	0.153453	0.193095	0.014049	0.296296	0.500639	0.719029	0.998723	0.002554	0.222222	0.532567	0.772669	1	0.001277	0.215837	0.448276	0.722861	0.960409	0.598978	0.148148	0.252874	0.056266	0.053708	0.002558	0.001277	0.226054	0.550447	0.753512	1	0.016603	0.199234	0.348659	0.482759	0.597701	0.015326	0.338442	0.572158	0.905492	0.997446	0.526181	0.319693	0.003831	0.263091	0.560664	0.738186	0.98212	0.435504
0.448276	0.364532	0.187192	0.337171	0.143092	0.157895	0.004926	0.228243	0.382594	0.650246	0.995074	0.003284	0.188834	0.472906	0.727422	1	0.001642	0.546798	0.692939	0.863711	0.996716	0.663383	0.085386	0.251232	0.03125	0.067434	0.004934	0.001642	0.183908	0.349754	0.617406	1	0.047619	0.614122	0.707718	0.821018	0.906404	0.029557	0.535304	0.668309	0.885057	0.995074	0.308703	0.213816	0.00821	0.579639	0.706076	0.850575	0.99179	0.425287
0.355694	0.297972	0.346334	0.173437	0.239063	0.23125	0.0078	0.24337	0.471139	0.769111	0.99532	0.00468	0.25117	0.519501	0.703588	1	0.00156	0.24805	0.50858	0.764431	0.99844	0.308892	0.102964	0.588144	0.0375	0.084375	0.003125	0.00156	0.266771	0.541342	0.795632	1	0.082683	0.232449	0.687988	0.865835	0.926677	0.00624	0.25273	0.444618	0.664587	0.9922	0.51014	0.415625	0.00312	0.25741	0.514821	0.74103	0.99064	0.318253
0.378788	0.32197	0.299242	0.231499	0.214421	0.201139	0.003788	0.17803	0.410985	0.714015	1	0.017045	0.219697	0.450758	0.727273	0.996212	0.001894	0.420455	0.600379	0.778409	0.998106	0.549242	0.142045	0.308712	0.051233	0.062619	0.005693	0.001894	0.136364	0.278409	0.619318	1	0.214015	0.524621	0.67803	0.844697	0.9375	0.295455	0.44697	0.604167	0.808712	0.994318	0.488636	0.349146	0.00947	0.390152	0.57197	0.791667	0.994318	0.340909
0.413043	0.25	0.336957	0.153846	0.296703	0.241758	0.021739	0.217391	0.434783	0.695652	1	0.076087	0.23913	0.456522	0.717391	0.956522	0.01087	0.184783	0.51087	0.804348	0.98913	0.445652	0.336957	0.217391	0.175824	0.043956	0	0.01087	0.315217	0.641304	0.771739	1	0.032609	0.23913	0.532609	0.793478	0.923913	0.119565	0.163043	0.358696	0.413043	0.467391	0.369565	0.395604	0.032609	0.184783	0.456522	0.771739	0.945652	0.228261
0.375	0.359375	0.265625	0.285714	0.206349	0.222222	0.046875	0.25	0.5	0.8125	1	0.03125	0.109375	0.375	0.640625	0.9375	0.015625	0.3125	0.53125	0.71875	0.984375	0.71875	0.171875	0.109375	0.126984	0.063492	0	0.015625	0.234375	0.5625	0.734375	1	0.265625	0.28125	0.421875	0.53125	0.875	0.078125	0.078125	0.109375	0.78125	0.8125	0.28125	0.380952	0.265625	0.328125	0.53125	0.625	0.875	0.375
0.302817	0.341549	0.355634	0.201413	0.215548	0.275618	0.017606	0.285211	0.507042	0.778169	0.996479	0.007042	0.228873	0.475352	0.711268	1	0.003521	0.232394	0.485915	0.725352	0.992958	0.415493	0.151408	0.433099	0.042403	0.091873	0	0.003521	0.179577	0.419014	0.690141	1	0.193662	0.285211	0.605634	0.644366	0.728873	0.045775	0.253521	0.528169	0.830986	0.992958	0.556338	0.424028	0.010563	0.235915	0.475352	0.679577	0.985915	0.352113
0.391892	0.314189	0.293919	0.216949	0.250847	0.162712	0.006757	0.280405	0.469595	0.783784	0.986486	0.016892	0.209459	0.439189	0.685811	0.996622	0.003378	0.222973	0.557432	0.756757	1	0.5	0.125	0.375	0.054237	0.067797	0	0.003378	0.202703	0.415541	0.641892	1	0.064189	0.162162	0.219595	0.310811	0.574324	0.10473	0.587838	0.692568	0.861486	0.97973	0.452703	0.40678	0.016892	0.256757	0.547297	0.722973	0.989865	0.35473
0.416321	0.35408	0.229599	0.288089	0.16482	0.160665	0.004149	0.300138	0.634855	0.807746	1	0.002766	0.271093	0.504841	0.767635	0.998617	0.001383	0.164592	0.334716	0.507607	0.917012	0.550484	0.230982	0.218534	0.087258	0.054017	0.006925	0.001383	0.305671	0.608575	0.771784	1	0.006916	0.142462	0.297372	0.475795	0.781466	0.062241	0.405256	0.626556	0.816044	0.97787	0.385892	0.33518	0.006916	0.193638	0.355463	0.539419	0.917012	0.39834
0.310734	0.449153	0.240113	0.246459	0.144476	0.229462	0.011299	0.288136	0.545198	0.740113	0.99435	0.00565	0.180791	0.432203	0.757062	0.988701	0.002825	0.327684	0.522599	0.725989	1	0.615819	0.186441	0.19774	0.073654	0.045326	0	0.002825	0.158192	0.381356	0.793785	1	0.149718	0.426554	0.536723	0.677966	0.813559	0.262712	0.403955	0.632768	0.757062	0.963277	0.548023	0.322946	0.008475	0.206215	0.488701	0.748588	0.997175	0.440678
0.316964	0.379464	0.303571	0.215247	0.188341	0.273543	0.035714	0.1875	0.522321	0.763393	0.995536	0.008929	0.227679	0.441964	0.727679	1	0.004464	0.272321	0.508929	0.732143	0.96875	0.598214	0.147321	0.254464	0.044843	0.053812	0	0.004464	0.147321	0.361607	0.598214	1	0.236607	0.5625	0.732143	0.785714	0.9375	0.299107	0.388393	0.625	0.6875	0.955357	0.441964	0.313901	0.102679	0.379464	0.5625	0.732143	0.982143	0.361607
0.244147	0.434783	0.32107	0.194631	0.201342	0.271812	0.006689	0.19398	0.411371	0.658863	0.989967	0.013378	0.250836	0.508361	0.782609	1	0.003344	0.277592	0.498328	0.725753	0.996656	0.428094	0.26087	0.311037	0.080537	0.04698	0.006711	0.003344	0.240803	0.538462	0.735786	1	0.113712	0.204013	0.424749	0.692308	0.819398	0.016722	0.347826	0.508361	0.889632	0.9699	0.555184	0.369128	0.010033	0.287625	0.491639	0.732441	0.996656	0.441472
0.342672	0.418103	0.239224	0.306695	0.181425	0.168467	0.00431	0.200431	0.463362	0.719828	0.99569	0.006466	0.273707	0.579741	0.765086	0.997845	0.002155	0.232759	0.420259	0.726293	1	0.661638	0.157328	0.181034	0.069114	0.034557	0	0.002155	0.280172	0.545259	0.730603	1	0.017241	0.165948	0.344828	0.838362	0.943966	0.06681	0.224138	0.4375	0.885776	0.982759	0.493534	0.362851	0.021552	0.338362	0.549569	0.726293	0.980603	0.459052
0.3	0.413333	0.286667	0.22964	0.192256	0.221629	0.005333	0.250667	0.510667	0.78	0.998667	0.006667	0.228	0.530667	0.721333	0.997333	0.001333	0.265333	0.445333	0.753333	1	0.632	0.184	0.184	0.093458	0.058745	0.00534	0.001333	0.221333	0.528	0.730667	1	0.004	0.297333	0.446667	0.797333	0.985333	0.033333	0.286667	0.458667	0.816	0.981333	0.550667	0.368491	0.012	0.313333	0.550667	0.748	0.996	0.442667
0.52809	0.191011	0.280899	0.159091	0.284091	0.159091	0.033708	0.247191	0.516854	0.764045	1	0.022472	0.168539	0.337079	0.573034	0.876404	0.011236	0.325843	0.494382	0.752809	0.977528	0.247191	0	0.752809	0	0.090909	0	0.011236	0.191011	0.258427	0.550562	1	0	0	0	0	0	0.05618	0.314607	0.505618	0.752809	0.955056	0.393258	0.431818	0.089888	0.314607	0.483146	0.707865	0.977528	0.157303
0.377823	0.340862	0.281314	0.263374	0.193416	0.183128	0.004107	0.246407	0.505133	0.770021	0.997947	0.008214	0.250513	0.517454	0.767967	1	0.002053	0.234086	0.474333	0.698152	0.98768	0.525667	0.164271	0.310062	0.076132	0.076132	0.002058	0.002053	0.205339	0.529774	0.800821	1	0.024641	0.135524	0.474333	0.804928	0.98768	0.008214	0.36345	0.494867	0.683778	0.944559	0.466119	0.329218	0.008214	0.377823	0.511294	0.755647	0.98768	0.342916
0.432	0.256	0.312	0.225806	0.233871	0.177419	0.048	0.272	0.52	0.776	1	0.032	0.232	0.448	0.712	0.984	0.008	0.216	0.48	0.704	0.968	0.432	0.168	0.4	0.056452	0.072581	0.008065	0.008	0.192	0.36	0.76	1	0.2	0.232	0.384	0.68	0.976	0.024	0.424	0.536	0.784	0.888	0.464	0.354839	0.016	0.352	0.504	0.696	0.968	0.248
0.325758	0.337121	0.337121	0.205323	0.235741	0.250951	0.007576	0.219697	0.454545	0.738636	0.981061	0.015152	0.268939	0.537879	0.772727	0.996212	0.003788	0.231061	0.511364	0.708333	1	0.367424	0.265152	0.367424	0.076046	0.076046	0.015209	0.003788	0.284091	0.473485	0.852273	1	0.060606	0.140152	0.587121	0.753788	0.94697	0.007576	0.227273	0.435606	0.69697	0.931818	0.55303	0.460076	0.003788	0.231061	0.522727	0.723485	0.984848	0.359848
0.42602	0.318878	0.255102	0.273657	0.255754	0.150895	0.005102	0.298469	0.528061	0.719388	1	0.012755	0.191327	0.461735	0.778061	0.997449	0.002551	0.242347	0.459184	0.762755	0.984694	0.443878	0.114796	0.441327	0.066496	0.056266	0.01023	0.002551	0.265306	0.520408	0.831633	1	0.012755	0.403061	0.788265	0.857143	0.987245	0.109694	0.227041	0.346939	0.630102	0.956633	0.298469	0.378517	0.010204	0.178571	0.390306	0.72449	0.984694	0.352041
0.38843	0.38961	0.22196	0.276596	0.165485	0.161939	0.003542	0.272727	0.57379	0.782763	0.998819	0.002361	0.199528	0.433294	0.720189	1	0.001181	0.271547	0.493506	0.668241	0.988194	0.641086	0.085006	0.273908	0.037825	0.082742	0.007092	0.001181	0.250295	0.478158	0.752066	1	0.101535	0.475797	0.5549	0.635183	0.946871	0.023613	0.167651	0.486423	0.787485	0.995277	0.453365	0.352246	0.005903	0.257379	0.439197	0.624557	0.988194	0.416765
0.310345	0.431034	0.258621	0.306358	0.17341	0.179191	0.028736	0.229885	0.54023	0.735632	1	0.011494	0.183908	0.511494	0.747126	0.977011	0.005747	0.247126	0.454023	0.724138	0.994253	0.591954	0.172414	0.235632	0.069364	0.080925	0	0.005747	0.16092	0.436782	0.701149	1	0.218391	0.252874	0.5	0.574713	0.95977	0.137931	0.321839	0.678161	0.752874	0.91954	0.436782	0.393064	0.017241	0.298851	0.477011	0.706897	0.965517	0.413793
0.34875	0.413125	0.238125	0.258286	0.171357	0.174484	0.00125	0.328125	0.540625	0.7475	1	0.0025	0.1675	0.386875	0.695625	0.999375	0.000625	0.331875	0.573125	0.825	0.99375	0.626875	0.043125	0.33	0.023765	0.067542	0.001251	0.000625	0.181875	0.369375	0.670625	1	0.019375	0.111875	0.205625	0.4475	0.89125	0.100625	0.5325	0.695	0.87	0.996875	0.39	0.370231	0.006875	0.28	0.561875	0.801875	0.995625	0.435625
0.273423	0.391013	0.335564	0.216268	0.204785	0.278469	0.005736	0.23805	0.466539	0.736138	0.989484	0.002868	0.264818	0.516252	0.759082	1	0.000956	0.231358	0.499044	0.73327	0.993308	0.472275	0.271511	0.256214	0.105263	0.053589	0.007656	0.000956	0.299235	0.528681	0.786807	1	0.010516	0.368069	0.601338	0.842256	0.993308	0.005736	0.116635	0.256214	0.622371	0.859465	0.634799	0.329187	0.003824	0.270554	0.540153	0.770554	0.997132	0.417782
0.277978	0.415162	0.306859	0.210145	0.166667	0.257246	0.025271	0.202166	0.512635	0.758123	0.99639	0.00722	0.245487	0.458484	0.700361	1	0.00361	0.281588	0.505415	0.740072	0.99278	0.422383	0.169675	0.407942	0.050725	0.072464	0	0.00361	0.184116	0.429603	0.700361	1	0.216606	0.314079	0.447653	0.65343	0.743682	0.054152	0.270758	0.537906	0.833935	0.99278	0.541516	0.376812	0.061372	0.285199	0.490975	0.689531	0.99278	0.436823
0.37	0.41	0.22	0.304348	0.197324	0.147157	0.006667	0.243333	0.45	0.703333	0.996667	0.01	0.213333	0.643333	0.823333	1	0.003333	0.253333	0.433333	0.586667	0.93	0.7	0.083333	0.216667	0.033445	0.040134	0	0.003333	0.306667	0.643333	0.816667	1	0.36	0.446667	0.466667	0.513333	0.613333	0.033333	0.223333	0.276667	0.423333	0.936667	0.28	0.32107	0.01	0.16	0.383333	0.513333	0.976667	0.396667
0.331307	0.410334	0.258359	0.323171	0.170732	0.246951	0.033435	0.346505	0.56535	0.787234	0.993921	0.006079	0.173252	0.413374	0.699088	1	0.00304	0.191489	0.510638	0.753799	0.969605	0.537994	0.221884	0.240122	0.088415	0.051829	0.003049	0.00304	0.243161	0.422492	0.723404	1	0.015198	0.288754	0.583587	0.756839	0.969605	0.036474	0.197568	0.504559	0.784195	0.927052	0.422492	0.353659	0.012158	0.164134	0.477204	0.75076	0.972644	0.43465
0.522727	0.25	0.227273	0.298851	0.264368	0.114943	0.034091	0.193182	0.409091	0.715909	1	0.022727	0.340909	0.625	0.829545	0.965909	0.011364	0.215909	0.465909	0.681818	0.863636	0.454545	0.090909	0.454545	0.057471	0.08046	0.011494	0.011364	0.25	0.465909	0.886364	1	0.306818	0.681818	0.829545	0.852273	0.875	0.090909	0.193182	0.443182	0.613636	0.784091	0.295455	0.390805	0.045455	0.363636	0.579545	0.693182	0.863636	0.261364
0.290909	0.384848	0.324242	0.203647	0.221884	0.221884	0.009091	0.242424	0.445455	0.736364	0.981818	0.012121	0.272727	0.478788	0.748485	0.99697	0.00303	0.221212	0.551515	0.760606	1	0.369697	0.160606	0.469697	0.045593	0.100304	0.00304	0.00303	0.215152	0.50303	0.745455	1	0.154545	0.284848	0.521212	0.70303	0.784848	0.015152	0.245455	0.487879	0.833333	0.990909	0.518182	0.401216	0.021212	0.236364	0.527273	0.69697	0.984848	0.381818
0.396552	0.258621	0.344828	0.210526	0.298246	0.140351	0.034483	0.155172	0.5	0.689655	1	0.068966	0.189655	0.431034	0.741379	0.896552	0.017241	0.275862	0.586207	0.775862	0.982759	0.310345	0.155172	0.534483	0.052632	0.122807	0.017544	0.017241	0.172414	0.413793	0.775862	1	0.034483	0.844828	0.87931	0.913793	0.965517	0.051724	0.206897	0.448276	0.62069	0.758621	0.482759	0.561404	0.051724	0.310345	0.586207	0.741379	0.982759	0.344828
0.475936	0.304813	0.219251	0.311828	0.225806	0.11828	0.048128	0.304813	0.545455	0.721925	0.994652	0.016043	0.26738	0.55615	0.780749	0.973262	0.005348	0.13369	0.342246	0.459893	1	0.641711	0.251337	0.106952	0.075269	0.021505	0	0.005348	0.395722	0.663102	0.823529	1	0.074866	0.144385	0.224599	0.374332	0.994652	0.02139	0.042781	0.454545	0.481283	0.508021	0.417112	0.387097	0.016043	0.203209	0.427807	0.727273	0.946524	0.272727
0.376068	0.299145	0.324786	0.258621	0.25	0.189655	0.034188	0.230769	0.512821	0.777778	1	0.017094	0.222222	0.487179	0.65812	0.982906	0.008547	0.239316	0.461538	0.760684	0.965812	0.478632	0.435897	0.08547	0.094828	0.025862	0.008621	0.008547	0.162393	0.512821	0.717949	1	0.034188	0.299145	0.452991	0.606838	0.897436	0.119658	0.128205	0.91453	0.931624	0.957265	0.401709	0.586207	0.025641	0.25641	0.42735	0.726496	0.940171	0.316239
0.328294	0.315335	0.356371	0.19697	0.225108	0.244589	0.008639	0.25486	0.511879	0.764579	1	0.00432	0.235421	0.526998	0.766739	0.99568	0.00216	0.237581	0.483801	0.693305	0.99784	0.401728	0.146868	0.451404	0.051948	0.090909	0.004329	0.00216	0.263499	0.526998	0.775378	1	0.095032	0.269978	0.444924	0.62851	0.734341	0.012959	0.209503	0.531317	0.790497	0.993521	0.552916	0.363636	0.012959	0.226782	0.447084	0.684665	0.974082	0.343413
0.330508	0.347458	0.322034	0.212766	0.225532	0.229787	0.012712	0.199153	0.5	0.788136	1	0.008475	0.258475	0.483051	0.728814	0.991525	0.004237	0.254237	0.508475	0.720339	0.940678	0.45339	0.317797	0.228814	0.110638	0.076596	0	0.004237	0.233051	0.423729	0.665254	1	0.038136	0.173729	0.309322	0.516949	0.783898	0.432203	0.694915	0.834746	0.898305	0.987288	0.538136	0.357447	0.016949	0.258475	0.487288	0.707627	0.927966	0.34322
0.316384	0.384181	0.299435	0.249292	0.192635	0.209632	0.022599	0.268362	0.502825	0.731638	0.99435	0.00565	0.189266	0.480226	0.779661	0.997175	0.002825	0.265537	0.516949	0.734463	1	0.491525	0.163842	0.344633	0.073654	0.050992	0.011331	0.002825	0.29661	0.573446	0.841808	1	0.09887	0.305085	0.514124	0.607345	0.988701	0.025424	0.180791	0.364407	0.686441	0.943503	0.50565	0.402266	0.022599	0.20339	0.403955	0.672316	0.988701	0.403955
0.437126	0.353293	0.209581	0.26506	0.186747	0.156627	0.023952	0.221557	0.467066	0.718563	1	0.011976	0.305389	0.473054	0.766467	0.994012	0.005988	0.185629	0.502994	0.682635	0.934132	0.634731	0.011976	0.353293	0.012048	0.084337	0	0.005988	0.281437	0.556886	0.748503	1	0.335329	0.335329	0.335329	0.335329	0.341317	0.125749	0.209581	0.491018	0.664671	0.91018	0.317365	0.313253	0.077844	0.353293	0.520958	0.676647	0.934132	0.359281
0.398305	0.29661	0.305085	0.205128	0.273504	0.25641	0.016949	0.161017	0.432203	0.711864	0.991525	0.025424	0.322034	0.542373	0.822034	0.974576	0.008475	0.228814	0.449153	0.745763	1	0.313559	0.228814	0.457627	0.08547	0.068376	0	0.008475	0.262712	0.508475	0.754237	1	0.271186	0.313559	0.398305	0.491525	0.847458	0.025424	0.127119	0.59322	0.70339	0.957627	0.457627	0.324786	0.042373	0.29661	0.483051	0.779661	0.983051	0.305085
0.312253	0.371542	0.316206	0.230159	0.178571	0.246032	0.011858	0.185771	0.391304	0.774704	1	0.007905	0.332016	0.541502	0.72332	0.996047	0.003953	0.252964	0.490119	0.719368	0.992095	0.387352	0.01581	0.596838	0.003968	0.138889	0.011905	0.003953	0.328063	0.537549	0.648221	1	0.422925	0.422925	0.426877	0.494071	0.498024	0.01581	0.177866	0.44664	0.778656	0.992095	0.545455	0.388889	0.023715	0.26087	0.505929	0.699605	0.976285	0.403162
0.311475	0.459016	0.229508	0.249315	0.150685	0.208219	0.005464	0.251366	0.461749	0.79235	0.994536	0.008197	0.259563	0.581967	0.748634	1	0.002732	0.221311	0.418033	0.631148	0.95082	0.860656	0.035519	0.103825	0.016438	0.038356	0.005479	0.002732	0.275956	0.540984	0.756831	1	0.016393	0.021858	0.297814	0.39071	0.885246	0.106557	0.139344	0.191257	0.461749	0.986339	0.363388	0.361644	0.008197	0.18306	0.47541	0.713115	0.980874	0.486339
0.337963	0.37963	0.282407	0.269767	0.15814	0.237209	0.009259	0.277778	0.509259	0.731481	0.986111	0.018519	0.240741	0.430556	0.763889	1	0.00463	0.185185	0.523148	0.717593	0.944444	0.541667	0.143519	0.314815	0.083721	0.065116	0	0.00463	0.273148	0.416667	0.722222	1	0.009259	0.055556	0.564815	0.712963	0.893519	0.092593	0.194444	0.541667	0.763889	0.949074	0.49537	0.353488	0.013889	0.324074	0.509259	0.75	0.949074	0.375
0.335938	0.390625	0.273438	0.267717	0.15748	0.244094	0.023438	0.210938	0.398438	0.71875	0.992188	0.015625	0.21875	0.539062	0.773438	1	0.007812	0.28125	0.554688	0.734375	0.960938	0.242188	0.046875	0.710938	0.015748	0.07874	0	0.007812	0.054688	0.5625	0.703125	1	0.945312	0.945312	0.960938	0.96875	0.984375	0.0625	0.28125	0.460938	0.71875	0.914062	0.445312	0.456693	0.03125	0.328125	0.523438	0.742188	0.96875	0.375
0.296053	0.388158	0.315789	0.205298	0.198675	0.258278	0.013158	0.289474	0.401316	0.690789	1	0.039474	0.236842	0.519737	0.717105	0.993421	0.006579	0.203947	0.539474	0.815789	0.980263	0.348684	0.322368	0.328947	0.13245	0.039735	0.013245	0.006579	0.138158	0.506579	0.743421	1	0.013158	0.243421	0.618421	0.881579	0.986842	0.164474	0.315789	0.401316	0.480263	0.815789	0.394737	0.490066	0.019737	0.203947	0.519737	0.736842	0.973684	0.407895
0.3375	0.370833	0.291667	0.23431	0.150628	0.225941	0.020833	0.233333	0.541667	0.783333	0.9875	0.016667	0.1875	0.408333	0.679167	0.995833	0.004167	0.308333	0.5375	0.729167	1	0.541667	0.2125	0.245833	0.062762	0.062762	0.012552	0.004167	0.15	0.2875	0.579167	1	0.008333	0.3875	0.591667	0.783333	0.995833	0.120833	0.441667	0.670833	0.8375	0.95	0.425	0.343096	0.0125	0.404167	0.575	0.7375	0.991667	0.408333
0.32526	0.404844	0.269896	0.253472	0.170139	0.21875	0.013841	0.245675	0.49827	0.799308	0.99308	0.00692	0.249135	0.515571	0.712803	0.99654	0.00346	0.231834	0.439446	0.723183	1	0.709343	0.155709	0.134948	0.090278	0.055556	0.006944	0.00346	0.33564	0.553633	0.740484	1	0.089965	0.217993	0.283737	0.854671	0.989619	0.017301	0.183391	0.311419	0.401384	0.979239	0.588235	0.319444	0.024221	0.342561	0.567474	0.726644	0.989619	0.370242
0.307143	0.321429	0.371429	0.150538	0.229391	0.25448	0.017857	0.221429	0.489286	0.807143	0.982143	0.007143	0.307143	0.553571	0.696429	1	0.003571	0.210714	0.460714	0.714286	0.989286	0.364286	0.175	0.460714	0.050179	0.09319	0	0.003571	0.189286	0.442857	0.721429	1	0.157143	0.317857	0.414286	0.621429	0.714286	0.007143	0.221429	0.510714	0.810714	0.992857	0.546429	0.401434	0.014286	0.246429	0.464286	0.678571	0.989286	0.328571
0.460208	0.256055	0.283737	0.232639	0.263889	0.135417	0.010381	0.238754	0.449827	0.754325	1	0.00692	0.15917	0.463668	0.6609	0.989619	0.00346	0.352941	0.557093	0.761246	0.99308	0.487889	0.16609	0.346021	0.059028	0.052083	0.003472	0.00346	0.145329	0.384083	0.681661	1	0.072664	0.432526	0.581315	0.847751	0.892734	0.148789	0.304498	0.515571	0.757785	0.965398	0.408304	0.361111	0.069204	0.394464	0.570934	0.775087	0.965398	0.301038
0.388235	0.329412	0.282353	0.25	0.214286	0.178571	0.070588	0.223529	0.517647	0.658824	1	0.058824	0.341176	0.623529	0.835294	0.988235	0.011765	0.152941	0.352941	0.6	0.894118	0.317647	0.305882	0.376471	0.119048	0.047619	0	0.011765	0.188235	0.435294	0.917647	1	0.023529	0.082353	0.235294	0.341176	0.494118	0.517647	0.6	0.694118	0.811765	0.905882	0.388235	0.47619	0.023529	0.211765	0.4	0.564706	0.929412	0.4
0.315018	0.43956	0.245421	0.294118	0.154412	0.1875	0.007326	0.21978	0.424908	0.695971	0.981685	0.010989	0.227106	0.567766	0.81685	1	0.003663	0.249084	0.472527	0.699634	0.989011	0.626374	0.113553	0.260073	0.036765	0.051471	0	0.003663	0.186813	0.520147	0.842491	1	0.054945	0.527473	0.630037	0.688645	0.791209	0.091575	0.289377	0.380952	0.575092	0.74359	0.347985	0.352941	0.018315	0.201465	0.538462	0.699634	0.989011	0.428571
0.323988	0.303219	0.372793	0.201663	0.22869	0.22973	0.002077	0.234683	0.460021	0.738318	0.998962	0.005192	0.277259	0.519211	0.754933	1	0.001038	0.246106	0.480789	0.748702	0.994808	0.253375	0.006231	0.740395	0.004158	0.095634	0.002079	0.001038	0.285566	0.509865	0.721703	1	0.008307	0.008307	0.627207	0.628245	0.846314	0.003115	0.239875	0.494289	0.752856	0.996885	0.569055	0.380457	0.005192	0.258567	0.522326	0.760125	0.997923	0.327103
0.423913	0.336957	0.23913	0.351648	0.186813	0.175824	0.032609	0.195652	0.434783	0.728261	1	0.021739	0.173913	0.413043	0.695652	0.934783	0.01087	0.358696	0.521739	0.804348	0.978261	0.597826	0.032609	0.369565	0.043956	0.043956	0	0.01087	0.141304	0.293478	0.554348	1	0.380435	0.380435	0.380435	0.391304	0.586957	0.445652	0.521739	0.782609	0.869565	0.967391	0.358696	0.395604	0.130435	0.434783	0.597826	0.804348	0.934783	0.347826
0.257692	0.498077	0.244231	0.22158	0.132948	0.204239	0.021154	0.280769	0.488462	0.676923	0.994231	0.003846	0.201923	0.492308	0.767308	1	0.001923	0.284615	0.513462	0.775	0.998077	0.675	0.130769	0.194231	0.05395	0.026975	0.011561	0.001923	0.213462	0.582692	0.763462	1	0.007692	0.321154	0.455769	0.901923	0.996154	0.063462	0.236538	0.373077	0.544231	0.990385	0.551923	0.308285	0.005769	0.278846	0.525	0.705769	0.998077	0.526923
0.329258	0.380786	0.289956	0.246503	0.181818	0.222028	0.004367	0.230568	0.510044	0.719651	0.998253	0.001747	0.273362	0.50393	0.777293	0.999127	0.000873	0.256769	0.478603	0.737991	1	0.464629	0.126638	0.408734	0.050699	0.082168	0.003497	0.000873	0.215721	0.50131	0.761572	1	0.039301	0.28821	0.396507	0.669869	0.988646	0.020087	0.259389	0.527511	0.764192	0.99738	0.526638	0.358392	0.017467	0.254148	0.468996	0.71441	0.993886	0.401747
0.403756	0.333333	0.262911	0.259434	0.254717	0.15566	0.014085	0.267606	0.492958	0.741784	1	0.00939	0.183099	0.408451	0.690141	0.995305	0.004695	0.319249	0.58216	0.779343	0.985915	0.488263	0.173709	0.338028	0.061321	0.070755	0.023585	0.004695	0.15493	0.516432	0.723005	1	0.230047	0.483568	0.638498	0.943662	0.99061	0.037559	0.328638	0.42723	0.737089	0.924883	0.460094	0.424528	0.018779	0.342723	0.502347	0.70892	0.985915	0.328638
0.428571	0.38961	0.181818	0.339869	0.150327	0.130719	0.012987	0.24026	0.461039	0.668831	1	0.032468	0.194805	0.37013	0.720779	0.974026	0.006494	0.590909	0.714286	0.883117	0.987013	0.577922	0.064935	0.357143	0.065359	0.052288	0	0.006494	0.324675	0.5	0.668831	1	0.051948	0.350649	0.37013	0.590909	0.779221	0.11039	0.188312	0.279221	0.87013	0.961039	0.266234	0.313725	0.058442	0.597403	0.714286	0.883117	0.980519	0.396104
0.246753	0.493506	0.25974	0.235294	0.117647	0.24183	0.025974	0.292208	0.577922	0.733766	0.974026	0.012987	0.201299	0.415584	0.701299	1	0.006494	0.227273	0.558442	0.772727	0.987013	0.681818	0.266234	0.051948	0.084967	0.006536	0.019608	0.006494	0.168831	0.337662	0.707792	1	0.376623	0.493506	0.623377	0.772727	0.987013	0.38961	0.396104	0.409091	0.642857	0.655844	0.428571	0.352941	0.123377	0.357143	0.538961	0.753247	0.987013	0.474026
0.356164	0.356164	0.287671	0.236111	0.277778	0.125	0.013699	0.136986	0.410959	0.630137	0.972603	0.205479	0.369863	0.671233	0.808219	0.958904	0.041096	0.164384	0.383562	0.60274	1	0.39726	0.30137	0.30137	0.152778	0.069444	0.013889	0.013699	0.219178	0.438356	0.589041	1	0.041096	0.39726	0.671233	0.739726	0.986301	0.082192	0.136986	0.328767	0.821918	0.90411	0.369863	0.472222	0.054795	0.246575	0.493151	0.684932	0.958904	0.342466
0.398058	0.281553	0.320388	0.254902	0.196078	0.186275	0.029126	0.165049	0.436893	0.650485	0.990291	0.019417	0.291262	0.495146	0.757282	1	0.009709	0.262136	0.466019	0.737864	0.951456	0.524272	0.359223	0.116505	0.127451	0.029412	0.009804	0.009709	0.203883	0.572816	0.854369	1	0.223301	0.339806	0.524272	0.718447	0.961165	0.116505	0.135922	0.165049	0.407767	0.436893	0.456311	0.333333	0.116505	0.320388	0.466019	0.737864	0.951456	0.378641
0.390418	0.346585	0.262997	0.272449	0.210204	0.184694	0.011213	0.264016	0.5158	0.715596	1	0.002039	0.234455	0.529052	0.792049	0.993884	0.001019	0.249745	0.447503	0.739042	0.997961	0.426096	0.061162	0.512742	0.026531	0.085714	0.002041	0.001019	0.246687	0.663609	0.833843	1	0.188583	0.739042	0.807339	0.866463	0.910296	0.004077	0.238532	0.398573	0.560652	0.997961	0.43527	0.355102	0.029562	0.258919	0.471967	0.768603	0.996942	0.359837
0.333333	0.350877	0.315789	0.228873	0.257042	0.211268	0.010526	0.242105	0.487719	0.789474	0.996491	0.007018	0.2	0.505263	0.698246	1	0.003509	0.273684	0.491228	0.729825	0.989474	0.385965	0.17193	0.442105	0.049296	0.091549	0	0.003509	0.217544	0.452632	0.701754	1	0.150877	0.308772	0.438596	0.642105	0.733333	0.007018	0.252632	0.526316	0.82807	0.992982	0.526316	0.380282	0.014035	0.245614	0.487719	0.680702	0.989474	0.364912
0.381275	0.367707	0.251018	0.258152	0.177989	0.157609	0.006784	0.213026	0.518318	0.791045	1	0.004071	0.229308	0.458616	0.709634	0.998643	0.001357	0.299864	0.523745	0.724559	0.997286	0.400271	0.024423	0.575305	0.009511	0.099185	0.001359	0.001357	0.105834	0.459973	0.815468	1	0.056988	0.061058	0.876526	0.881954	0.924016	0.157395	0.327001	0.506106	0.690638	0.993216	0.431479	0.347826	0.016282	0.332429	0.503392	0.693351	0.994573	0.393487
0.484375	0.242188	0.273438	0.19685	0.314961	0.11811	0.039062	0.257812	0.492188	0.773438	1	0.015625	0.15625	0.546875	0.898438	0.984375	0.007812	0.148438	0.382812	0.609375	0.796875	0.328125	0.289062	0.382812	0.070866	0.055118	0.007874	0.007812	0.304688	0.484375	0.796875	1	0.03125	0.09375	0.40625	0.515625	0.765625	0.164062	0.25	0.632812	0.828125	0.929688	0.390625	0.346457	0.054688	0.210938	0.4375	0.609375	0.773438	0.242188
0.340102	0.345178	0.314721	0.229008	0.229008	0.223919	0.007614	0.271574	0.497462	0.763959	0.997462	0.005076	0.228426	0.472081	0.746193	0.989848	0.002538	0.243655	0.520305	0.738579	1	0.467005	0.213198	0.319797	0.083969	0.089059	0.017812	0.002538	0.238579	0.459391	0.751269	1	0.017766	0.335025	0.558376	0.738579	0.92132	0.048223	0.203046	0.525381	0.771574	0.984772	0.527919	0.437659	0.017766	0.261421	0.530457	0.741117	0.994924	0.383249
0.45092	0.392638	0.156442	0.378462	0.12	0.098462	0.006135	0.315951	0.527607	0.760736	0.993865	0.009202	0.340491	0.625767	0.834356	1	0.003067	0.113497	0.199387	0.312883	0.745399	0.671779	0.101227	0.226994	0.067692	0.092308	0	0.003067	0.346626	0.558282	0.757669	1	0.052147	0.122699	0.233129	0.325153	0.518405	0.01227	0.171779	0.47546	0.806748	0.98773	0.220859	0.276923	0.009202	0.156442	0.257669	0.441718	0.97546	0.380368
0.232877	0.554795	0.212329	0.223368	0.089347	0.216495	0.006849	0.363014	0.503425	0.756849	1	0.010274	0.243151	0.469178	0.688356	0.986301	0.003425	0.215753	0.527397	0.767123	0.996575	0.719178	0.075342	0.205479	0.054983	0.041237	0.006873	0.003425	0.239726	0.469178	0.763699	1	0.071918	0.099315	0.777397	0.821918	0.90411	0.14726	0.421233	0.5	0.558219	0.835616	0.469178	0.302405	0.013699	0.212329	0.441781	0.599315	0.907534	0.59589
0.270833	0.34375	0.385417	0.2	0.221053	0.284211	0.020833	0.166667	0.364583	0.614583	0.979167	0.041667	0.25	0.552083	0.71875	0.96875	0.010417	0.28125	0.5	0.802083	1	0.46875	0.322917	0.208333	0.147368	0.042105	0	0.010417	0.229167	0.614583	0.84375	1	0.041667	0.270833	0.552083	0.78125	0.90625	0.125	0.166667	0.354167	0.40625	0.458333	0.34375	0.378947	0.041667	0.1875	0.416667	0.5625	0.927083	0.260417
0.384615	0.312821	0.302564	0.216495	0.21134	0.226804	0.015385	0.174359	0.461538	0.692308	1	0.010256	0.266667	0.482051	0.723077	0.989744	0.005128	0.246154	0.523077	0.758974	0.979487	0.425641	0.220513	0.353846	0.06701	0.06701	0.005155	0.005128	0.220513	0.558974	0.779487	1	0.158974	0.430769	0.651282	0.738462	0.979487	0.035897	0.235897	0.34359	0.523077	0.948718	0.492308	0.443299	0.046154	0.266667	0.502564	0.717949	0.979487	0.338462
0.371981	0.277778	0.350242	0.174334	0.268765	0.227603	0.007246	0.248792	0.504831	0.777778	1	0.004831	0.21256	0.495169	0.710145	0.997585	0.002415	0.253623	0.485507	0.7343	0.995169	0.342995	0.13285	0.524155	0.067797	0.11138	0.004843	0.002415	0.21256	0.543478	0.818841	1	0.086957	0.176329	0.516908	0.92029	0.997585	0.007246	0.26087	0.463768	0.71256	0.951691	0.572464	0.387409	0.014493	0.236715	0.454106	0.664251	0.995169	0.299517
0.353333	0.295556	0.351111	0.207127	0.25167	0.207127	0.006667	0.217778	0.475556	0.755556	0.971111	0.008889	0.3	0.522222	0.76	0.997778	0.002222	0.222222	0.486667	0.728889	1	0.351111	0.08	0.568889	0.028953	0.100223	0.002227	0.002222	0.251111	0.533333	0.784444	1	0.222222	0.295556	0.477778	0.544444	0.626667	0.004444	0.184444	0.504444	0.755556	0.96	0.54	0.4098	0.004444	0.264444	0.488889	0.677778	0.995556	0.333333
0.265152	0.390152	0.344697	0.235741	0.174905	0.315589	0.018939	0.227273	0.560606	0.82197	0.992424	0.007576	0.295455	0.511364	0.80303	1	0.003788	0.204545	0.412879	0.628788	0.981061	0.496212	0.348485	0.155303	0.102662	0.064639	0.003802	0.003788	0.314394	0.579545	0.863636	1	0.011364	0.246212	0.409091	0.602273	0.962121	0.05303	0.094697	0.511364	0.768939	0.82197	0.481061	0.418251	0.011364	0.261364	0.454545	0.625	0.981061	0.412879
0.330645	0.4	0.269355	0.253635	0.15832	0.208401	0.022581	0.3	0.530645	0.820968	1	0.003226	0.204839	0.45	0.695161	0.985484	0.001613	0.282258	0.529032	0.724194	0.974194	0.540323	0.140323	0.319355	0.050081	0.072698	0.004847	0.001613	0.143548	0.408065	0.759677	1	0.174194	0.403226	0.614516	0.727419	0.848387	0.006452	0.340323	0.551613	0.746774	0.977419	0.503226	0.310178	0.006452	0.287097	0.491935	0.696774	0.974194	0.440323
0.415042	0.231198	0.35376	0.165969	0.324965	0.182706	0.008357	0.236769	0.513928	0.756267	0.998607	0.005571	0.266017	0.504178	0.735376	0.994429	0.001393	0.231198	0.470752	0.739554	1	0.469359	0.224234	0.306407	0.093445	0.059972	0.004184	0.001393	0.204735	0.430362	0.707521	1	0.045961	0.192201	0.456825	0.845404	0.979109	0.006964	0.348189	0.575209	0.735376	0.997214	0.573816	0.407252	0.004178	0.253482	0.491643	0.746518	0.997214	0.256267
0.343949	0.343949	0.312102	0.307692	0.198718	0.230769	0.012739	0.235669	0.477707	0.738854	1	0.076433	0.242038	0.452229	0.719745	0.993631	0.006369	0.184713	0.535032	0.726115	0.961783	0.630573	0.165605	0.203822	0.057692	0.044872	0.019231	0.006369	0.191083	0.350318	0.617834	1	0.019108	0.490446	0.764331	0.821656	0.974522	0.044586	0.541401	0.66242	0.88535	0.936306	0.414013	0.410256	0.019108	0.261146	0.414013	0.707006	0.968153	0.369427
0.33	0.31	0.36	0.262626	0.252525	0.222222	0.07	0.26	0.55	0.81	1	0.03	0.17	0.38	0.71	0.98	0.01	0.27	0.49	0.7	0.97	0.4	0.34	0.26	0.090909	0.050505	0.010101	0.01	0.16	0.38	0.61	1	0.09	0.41	0.54	0.68	0.96	0.19	0.24	0.73	0.79	0.89	0.46	0.464646	0.04	0.19	0.53	0.71	0.95	0.32
0.332046	0.476834	0.19112	0.257253	0.145068	0.170213	0.011583	0.222008	0.434363	0.658301	0.986486	0.003861	0.279923	0.602317	0.851351	1	0.001931	0.189189	0.444015	0.619691	0.978764	0.716216	0.073359	0.210425	0.038685	0.034816	0	0.001931	0.305019	0.635135	0.820463	1	0.007722	0.316602	0.353282	0.472973	0.623552	0.046332	0.148649	0.266409	0.494208	0.677606	0.328185	0.313346	0.007722	0.262548	0.438224	0.61583	0.957529	0.5
0.29904	0.460905	0.240055	0.233516	0.144231	0.206044	0.004115	0.201646	0.530864	0.759945	1	0.002743	0.231824	0.41701	0.689986	0.994513	0.001372	0.29904	0.603567	0.805213	0.998628	0.714678	0.106996	0.178326	0.049451	0.052198	0.002747	0.001372	0.224966	0.441701	0.659808	1	0.009602	0.283951	0.709191	0.840878	0.997257	0.082305	0.364883	0.670782	0.875171	0.972565	0.499314	0.326923	0.005487	0.286694	0.518519	0.716049	0.995885	0.45679
0.336066	0.344262	0.319672	0.231405	0.231405	0.214876	0.040984	0.180328	0.491803	0.696721	0.991803	0.032787	0.319672	0.57377	0.762295	0.97541	0.008197	0.188525	0.434426	0.721311	1	0.336066	0.221311	0.442623	0.082645	0.066116	0	0.008197	0.221311	0.467213	0.754098	1	0.245902	0.286885	0.368852	0.459016	0.852459	0.065574	0.163934	0.606557	0.713115	0.959016	0.459016	0.297521	0.02459	0.295082	0.467213	0.786885	0.983607	0.311475
0.292614	0.465909	0.241477	0.290598	0.136752	0.188034	0.008523	0.258523	0.522727	0.801136	0.997159	0.005682	0.184659	0.392045	0.639205	0.991477	0.002841	0.40625	0.616477	0.786932	1	0.616477	0.215909	0.167614	0.068376	0.034188	0.005698	0.002841	0.153409	0.306818	0.605114	1	0.329545	0.428977	0.622159	0.821023	0.977273	0.494318	0.596591	0.715909	0.84375	0.903409	0.596591	0.358974	0.017045	0.247159	0.528409	0.730114	0.977273	0.471591
0.28022	0.406593	0.313187	0.21547	0.198895	0.270718	0.06044	0.247253	0.5	0.791209	1	0.010989	0.258242	0.538462	0.703297	0.967033	0.005495	0.164835	0.428571	0.774725	0.994505	0.554945	0.417582	0.027473	0.127072	0.005525	0.005525	0.005495	0.357143	0.604396	0.741758	1	0.027473	0.17033	0.340659	0.824176	0.994505	0.428571	0.428571	0.434066	0.43956	0.450549	0.576923	0.364641	0.016484	0.21978	0.527473	0.747253	0.994505	0.368132
0.296296	0.416667	0.287037	0.232198	0.176471	0.28483	0.07716	0.299383	0.515432	0.740741	0.978395	0.006173	0.197531	0.503086	0.759259	1	0.003086	0.209877	0.462963	0.703704	0.993827	0.481481	0.262346	0.256173	0.105263	0.06192	0	0.003086	0.212963	0.54321	0.780864	1	0.015432	0.277778	0.450617	0.753086	0.950617	0.101852	0.246914	0.524691	0.716049	0.984568	0.438272	0.297214	0.009259	0.200617	0.453704	0.731481	0.993827	0.432099
0.324324	0.416462	0.259214	0.276753	0.153752	0.211562	0.003686	0.214988	0.476658	0.79484	0.997543	0.002457	0.234644	0.525799	0.740786	1	0.001229	0.302211	0.471744	0.712531	0.998771	0.492629	0.12285	0.384521	0.04797	0.092251	0.00369	0.001229	0.137592	0.41769	0.67199	1	0.009828	0.321867	0.471744	0.594595	0.716216	0.040541	0.361179	0.641278	0.821867	0.995086	0.44226	0.305043	0.0086	0.289926	0.488943	0.701474	0.996314	0.444717
0.369942	0.369942	0.260116	0.284884	0.197674	0.238372	0.011561	0.202312	0.445087	0.803468	1	0.023121	0.260116	0.49711	0.716763	0.99422	0.00578	0.254335	0.520231	0.710983	0.965318	0.566474	0.179191	0.254335	0.052326	0.075581	0.005814	0.00578	0.17341	0.34104	0.624277	1	0.242775	0.393064	0.635838	0.682081	0.884393	0.023121	0.491329	0.734104	0.797688	0.965318	0.549133	0.337209	0.023121	0.33526	0.554913	0.710983	0.965318	0.398844
0.373585	0.403774	0.222642	0.234139	0.164653	0.173716	0.005283	0.209811	0.438491	0.69283	0.999245	0.001509	0.273208	0.544151	0.759245	0.996226	0.000755	0.283774	0.529057	0.802264	1	0.671698	0.068679	0.259623	0.029456	0.062689	0.005287	0.000755	0.237736	0.533585	0.77283	1	0.002264	0.050566	0.480755	0.687547	0.903396	0.009811	0.306415	0.426415	0.676981	0.96	0.477736	0.291541	0.003774	0.32	0.632453	0.86717	0.996226	0.446038
0.29771	0.419847	0.282443	0.192308	0.161538	0.284615	0.022901	0.251908	0.580153	0.80916	0.992366	0.015267	0.229008	0.427481	0.671756	0.923664	0.007634	0.19084	0.480916	0.748092	1	0.526718	0.244275	0.229008	0.076923	0.046154	0	0.007634	0.221374	0.396947	0.839695	1	0.099237	0.183206	0.282443	0.603053	0.801527	0.40458	0.450382	0.51145	0.687023	0.984733	0.473282	0.4	0.068702	0.198473	0.419847	0.656489	0.977099	0.435115
0.368864	0.417952	0.213184	0.280899	0.151685	0.161517	0.002805	0.235624	0.429173	0.667602	0.998597	0.004208	0.290323	0.608696	0.810659	1	0.001403	0.231417	0.464236	0.681627	0.997195	0.706872	0.145863	0.147265	0.075843	0.047753	0	0.001403	0.308555	0.605891	0.786816	1	0.00561	0.224404	0.352034	0.546985	0.995792	0.02805	0.15568	0.269285	0.509116	0.848527	0.45021	0.33427	0.007013	0.339411	0.628331	0.812062	0.99439	0.415147
0.492537	0.268657	0.238806	0.287879	0.363636	0.075758	0.029851	0.253731	0.462687	0.731343	1	0.044776	0.179104	0.507463	0.61194	0.955224	0.014925	0.208955	0.41791	0.686567	0.895522	0.19403	0	0.80597	0	0.090909	0	0.014925	0.044776	0.567164	0.940299	1	0	0	0	0	0	0.059701	0.268657	0.477612	0.716418	0.925373	0.313433	0.454545	0.089552	0.313433	0.432836	0.641791	0.895522	0.283582
0.348214	0.366071	0.285714	0.216216	0.18018	0.153153	0.044643	0.285714	0.508929	0.776786	0.991071	0.080357	0.214286	0.428571	0.625	1	0.008929	0.1875	0.535714	0.723214	0.928571	0.446429	0.205357	0.348214	0.09009	0.09009	0	0.008929	0.232143	0.401786	0.625	1	0.017857	0.053571	0.196429	0.571429	0.741071	0.276786	0.455357	0.660714	0.883929	0.973214	0.383929	0.378378	0.026786	0.196429	0.428571	0.696429	0.928571	0.392857
0.376344	0.290323	0.333333	0.219424	0.26259	0.172662	0.007168	0.25448	0.494624	0.727599	0.978495	0.02509	0.243728	0.544803	0.777778	1	0.003584	0.240143	0.458781	0.709677	0.97491	0.387097	0.168459	0.444444	0.05036	0.086331	0	0.003584	0.193548	0.455197	0.698925	1	0.16129	0.258065	0.390681	0.591398	0.681004	0.007168	0.225806	0.498208	0.799283	0.960573	0.55914	0.417266	0.017921	0.243728	0.46595	0.666667	0.97491	0.297491
0.369067	0.356792	0.274141	0.235872	0.231777	0.185094	0.002455	0.269231	0.536825	0.761866	1	0.001637	0.205401	0.461538	0.729133	0.997545	0.000818	0.261866	0.489362	0.747136	0.998363	0.425532	0.202946	0.371522	0.09828	0.070434	0.001638	0.000818	0.180033	0.45581	0.729951	1	0.013912	0.272504	0.488543	0.716858	0.984452	0.026187	0.306874	0.566285	0.788052	0.998363	0.404255	0.484848	0.006547	0.273322	0.521277	0.759411	0.998363	0.376432
0.328829	0.405405	0.265766	0.289593	0.199095	0.180995	0.009009	0.202703	0.382883	0.693694	0.995495	0.045045	0.333333	0.536036	0.765766	0.990991	0.004505	0.13964	0.513514	0.734234	1	0.445946	0.211712	0.342342	0.095023	0.085973	0.004525	0.004505	0.333333	0.603604	0.837838	1	0.009009	0.162162	0.414414	0.612613	0.936937	0.040541	0.243243	0.328829	0.689189	0.986486	0.364865	0.41629	0.013514	0.198198	0.445946	0.68018	0.986486	0.423423
0.311321	0.367925	0.320755	0.227488	0.232227	0.246445	0.014151	0.264151	0.495283	0.787736	1	0.009434	0.193396	0.433962	0.75	0.990566	0.004717	0.311321	0.5	0.693396	0.957547	0.466981	0.386792	0.146226	0.137441	0.052133	0.004739	0.004717	0.212264	0.580189	0.820755	1	0.037736	0.306604	0.457547	0.636792	0.962264	0.108491	0.136792	0.273585	0.650943	0.910377	0.415094	0.454976	0.037736	0.264151	0.457547	0.683962	0.957547	0.386792
0.430233	0.27907	0.290698	0.294118	0.247059	0.152941	0.034884	0.255814	0.476744	0.662791	0.953488	0.023256	0.186047	0.546512	0.813953	0.988372	0.011628	0.232558	0.465116	0.686047	1	0.174419	0	0.825581	0	0.094118	0	0.011628	0.034884	0.5	0.767442	1	0	0	0	0	0	0.05814	0.244186	0.453488	0.709302	0.976744	0.313953	0.447059	0.081395	0.232558	0.546512	0.72093	0.965116	0.27907
0.353033	0.33437	0.312597	0.224299	0.23676	0.211838	0.004666	0.203733	0.466563	0.696734	0.998445	0.00311	0.283048	0.536547	0.765163	0.99689	0.001555	0.227061	0.517885	0.760498	1	0.407465	0.066874	0.525661	0.029595	0.104361	0.001558	0.001555	0.292379	0.55832	0.810264	1	0.060653	0.11042	0.744946	0.88647	0.970451	0.00311	0.242613	0.458787	0.645412	0.993779	0.556765	0.392523	0.007776	0.255054	0.544323	0.77916	0.992224	0.362364
0.452096	0.434132	0.113772	0.381381	0.12012	0.069069	0.011976	0.275449	0.482036	0.718563	1	0.005988	0.308383	0.649701	0.805389	0.991018	0.002994	0.07485	0.212575	0.335329	0.556886	0.898204	0.020958	0.080838	0.018018	0.036036	0	0.002994	0.236527	0.538922	0.775449	1	0.020958	0.020958	0.335329	0.341317	0.347305	0.08982	0.254491	0.38024	0.44012	0.57485	0.173653	0.198198	0.038922	0.188623	0.290419	0.416168	0.772455	0.476048
0.388889	0.247475	0.363636	0.17952	0.307206	0.207332	0.006313	0.260101	0.536616	0.775253	1	0.005051	0.244949	0.460859	0.72601	0.994949	0.001263	0.234848	0.488636	0.741162	0.997475	0.477273	0.224747	0.29798	0.092288	0.059418	0.001264	0.001263	0.213384	0.450758	0.742424	1	0.041667	0.179293	0.429293	0.791667	0.997475	0.006313	0.329545	0.573232	0.75	0.991162	0.573232	0.389381	0.003788	0.268939	0.479798	0.734848	0.997475	0.277778
0.324455	0.377724	0.297821	0.242718	0.174757	0.203883	0.009685	0.239709	0.472155	0.760291	0.992736	0.004843	0.217918	0.506053	0.716707	0.997579	0.002421	0.280872	0.498789	0.767554	1	0.610169	0.164649	0.225182	0.067961	0.038835	0	0.002421	0.152542	0.489104	0.697337	1	0.159806	0.246973	0.438257	0.811138	0.922518	0.213075	0.324455	0.51816	0.854722	0.985472	0.416465	0.373786	0.024213	0.317191	0.527845	0.733656	0.96368	0.384988
0.315789	0.361842	0.322368	0.271523	0.205298	0.18543	0.026316	0.230263	0.493421	0.730263	0.993421	0.013158	0.263158	0.519737	0.822368	1	0.006579	0.236842	0.453947	0.684211	0.927632	0.361842	0.177632	0.460526	0.07947	0.07947	0	0.006579	0.184211	0.348684	0.875	1	0.052632	0.085526	0.164474	0.230263	0.940789	0.269737	0.453947	0.598684	0.75	0.868421	0.532895	0.437086	0.052632	0.269737	0.447368	0.690789	0.934211	0.368421
0.282451	0.390447	0.327103	0.205821	0.199584	0.279626	0.002077	0.224299	0.476636	0.739356	0.997923	0.003115	0.283489	0.537902	0.779855	1	0.001038	0.253375	0.477674	0.724818	0.998962	0.47352	0.166147	0.360332	0.076923	0.087318	0.008316	0.001038	0.279335	0.556594	0.760125	1	0.022845	0.274143	0.507788	0.773624	0.976116	0.010384	0.226376	0.418484	0.701973	0.997923	0.615784	0.365904	0.003115	0.262721	0.477674	0.751817	0.998962	0.407061
0.370871	0.333333	0.295796	0.245113	0.21203	0.209023	0.004505	0.243243	0.496997	0.750751	0.998498	0.006006	0.192192	0.441441	0.734234	0.992492	0.001502	0.325826	0.533033	0.749249	1	0.509009	0.124625	0.366366	0.039098	0.07218	0.009023	0.001502	0.13964	0.34985	0.737237	1	0.024024	0.405405	0.569069	0.684685	0.795796	0.013514	0.373874	0.558559	0.812312	0.947447	0.495495	0.345865	0.006006	0.301802	0.483483	0.726727	0.992492	0.34985
0.309859	0.330986	0.359155	0.212766	0.241135	0.269504	0.042254	0.274648	0.471831	0.676056	0.957746	0.021127	0.197183	0.5	0.774648	0.985915	0.007042	0.253521	0.492958	0.760563	1	0.408451	0.309859	0.28169	0.148936	0.06383	0.007092	0.007042	0.211268	0.549296	0.704225	1	0.225352	0.471831	0.619718	0.830986	0.992958	0.06338	0.147887	0.28169	0.352113	0.922535	0.464789	0.411348	0.014085	0.253521	0.521127	0.795775	0.992958	0.323944
0.351485	0.361386	0.287129	0.278607	0.243781	0.208955	0.019802	0.222772	0.480198	0.782178	1	0.009901	0.277228	0.559406	0.767327	0.99505	0.00495	0.237624	0.450495	0.678218	0.990099	0.415842	0.39604	0.188119	0.124378	0.064677	0.004975	0.00495	0.282178	0.584158	0.806931	1	0.009901	0.29703	0.445545	0.633663	0.886139	0.079208	0.222772	0.559406	0.782178	0.990099	0.420792	0.457711	0.014851	0.242574	0.445545	0.663366	0.89604	0.361386
0.445321	0.296505	0.258174	0.231377	0.215576	0.170429	0.003382	0.229989	0.43292	0.721533	0.997745	0.002255	0.285231	0.551297	0.759865	0.998873	0.001127	0.275085	0.532131	0.770011	1	0.478016	0.19053	0.331454	0.072235	0.085779	0.002257	0.001127	0.207441	0.473506	0.737317	1	0.003382	0.290868	0.543405	0.782413	0.989853	0.016911	0.310034	0.51071	0.723788	0.978579	0.383315	0.31377	0.002255	0.29876	0.528749	0.776776	0.990981	0.337091
0.584416	0.255411	0.160173	0.247826	0.165217	0.073913	0.008658	0.290043	0.52381	0.722944	1	0.017316	0.220779	0.688312	0.844156	0.987013	0.004329	0.181818	0.294372	0.372294	0.978355	0.480519	0.004329	0.515152	0.008696	0.078261	0	0.004329	0.116883	0.359307	0.865801	1	0.229437	0.229437	0.229437	0.229437	0.229437	0.17316	0.385281	0.519481	0.658009	0.878788	0.147186	0.156522	0.034632	0.181818	0.268398	0.333333	0.532468	0.272727
0.393832	0.362487	0.24368	0.276682	0.186141	0.190693	0.001517	0.276036	0.538928	0.778564	1	0.001011	0.216886	0.444894	0.716886	0.999494	0.000506	0.258847	0.508595	0.748736	0.9909	0.623357	0.141557	0.235086	0.065756	0.073849	0.011128	0.000506	0.212336	0.470172	0.735086	1	0.035389	0.362993	0.502528	0.77907	0.979272	0.042467	0.33367	0.538423	0.786148	0.997978	0.350354	0.363177	0.003033	0.217897	0.479272	0.72093	0.992417	0.394338
0.385185	0.377778	0.237037	0.276119	0.208955	0.216418	0.044444	0.281481	0.511111	0.8	1	0.02963	0.237037	0.4	0.711111	0.985185	0.007407	0.155556	0.577778	0.762963	0.955556	0.674074	0.17037	0.155556	0.052239	0.067164	0.022388	0.007407	0.2	0.37037	0.651852	1	0.022222	0.555556	0.822222	0.888889	0.933333	0.037037	0.459259	0.622222	0.718519	0.97037	0.377778	0.41791	0.022222	0.377778	0.474074	0.718519	0.985185	0.355556
0.367089	0.341772	0.291139	0.192308	0.24359	0.179487	0.025316	0.240506	0.56962	0.721519	0.974684	0.050633	0.227848	0.379747	0.759494	1	0.012658	0.177215	0.417722	0.64557	0.898734	0.696203	0.21519	0.088608	0.102564	0.025641	0	0.012658	0.240506	0.518987	0.734177	1	0.139241	0.177215	0.265823	0.417722	0.670886	0.746835	0.746835	0.772152	0.797468	0.822785	0.443038	0.384615	0.063291	0.227848	0.405063	0.556962	0.898734	0.367089
0.26025	0.499109	0.240642	0.233929	0.125	0.241071	0.017825	0.253119	0.474153	0.782531	1	0.00713	0.272727	0.520499	0.71836	0.998217	0.001783	0.226381	0.465241	0.787879	0.994652	0.705882	0.135472	0.158645	0.060714	0.053571	0.003571	0.001783	0.301248	0.527629	0.734403	1	0.131907	0.279857	0.547237	0.809269	0.894831	0.051693	0.160428	0.286988	0.782531	0.973262	0.568627	0.346429	0.01426	0.276292	0.515152	0.766488	0.998217	0.486631
0.37931	0.352087	0.268603	0.285455	0.198182	0.183636	0.00726	0.255898	0.537205	0.749546	0.994555	0.00363	0.232305	0.408348	0.709619	0.998185	0.001815	0.248639	0.53539	0.767695	1	0.540835	0.14882	0.310345	0.061818	0.065455	0.003636	0.001815	0.252269	0.439201	0.747731	1	0.041742	0.23775	0.491833	0.588022	0.807623	0.018149	0.274047	0.640653	0.833031	0.978221	0.459165	0.338182	0.010889	0.283122	0.586207	0.780399	0.983666	0.37931
0.262887	0.371134	0.365979	0.207254	0.207254	0.284974	0.030928	0.195876	0.515464	0.747423	0.958763	0.020619	0.273196	0.5	0.783505	1	0.005155	0.231959	0.469072	0.71134	0.979381	0.417526	0.463918	0.118557	0.124352	0.041451	0	0.005155	0.283505	0.582474	0.824742	1	0.010309	0.324742	0.510309	0.675258	0.93299	0.082474	0.103093	0.242268	0.273196	0.984536	0.453608	0.487047	0.015464	0.262887	0.474227	0.695876	0.938144	0.386598
0.340716	0.425894	0.23339	0.242321	0.158703	0.204778	0.005111	0.192504	0.449744	0.763203	1	0.006814	0.327087	0.536627	0.703578	0.998296	0.001704	0.218058	0.454855	0.79046	0.994889	0.621806	0.11414	0.264055	0.042662	0.069966	0.005119	0.001704	0.277683	0.529813	0.715503	1	0.093697	0.235094	0.340716	0.599659	0.994889	0.010221	0.192504	0.454855	0.795571	0.993186	0.402044	0.337884	0.010221	0.27598	0.446337	0.720613	0.984668	0.415673
0.343023	0.488372	0.168605	0.303207	0.139942	0.107872	0.008721	0.203488	0.436047	0.630814	0.994186	0.005814	0.284884	0.659884	0.822674	1	0.002907	0.247093	0.415698	0.534884	0.947674	0.712209	0.168605	0.119186	0.061224	0.03207	0.002915	0.002907	0.194767	0.642442	0.819767	1	0.165698	0.27907	0.375	0.517442	0.613372	0.162791	0.223837	0.331395	0.459302	0.630814	0.514535	0.268222	0.046512	0.40407	0.697674	0.825581	0.994186	0.488372
0.384615	0.384615	0.230769	0.322222	0.188889	0.111111	0.032967	0.307692	0.494505	0.78022	0.978022	0.076923	0.197802	0.461538	0.736264	1	0.010989	0.098901	0.428571	0.681319	0.912088	0.461538	0.296703	0.241758	0.111111	0.066667	0	0.010989	0.296703	0.483516	0.736264	1	0.021978	0.076923	0.230769	0.406593	0.593407	0.615385	0.659341	0.791209	0.846154	0.945055	0.450549	0.333333	0.021978	0.21978	0.428571	0.648352	0.912088	0.351648
0.273141	0.494689	0.23217	0.226444	0.12614	0.215805	0.030349	0.209408	0.488619	0.707132	0.995448	0.003035	0.227618	0.479514	0.748103	1	0.001517	0.329287	0.52959	0.772382	0.996965	0.637329	0.098634	0.264036	0.042553	0.066869	0.00304	0.001517	0.283763	0.626707	0.792109	1	0.353566	0.421851	0.518968	0.925645	0.996965	0.007587	0.162367	0.29742	0.447648	0.989378	0.538695	0.319149	0.010622	0.330804	0.581184	0.763278	0.998483	0.517451
0.385802	0.322531	0.291667	0.230294	0.224111	0.157651	0.003086	0.180556	0.395062	0.692901	0.99537	0.007716	0.287037	0.555556	0.790123	1	0.001543	0.337963	0.552469	0.774691	0.996914	0.342593	0.037037	0.62037	0.018547	0.092736	0.006182	0.001543	0.097222	0.291667	0.728395	1	0.009259	0.061728	0.438272	0.455247	0.859568	0.100309	0.353395	0.554012	0.753086	0.996914	0.472222	0.36476	0.013889	0.373457	0.569444	0.782407	0.996914	0.330247
0.306159	0.519928	0.173913	0.255898	0.098004	0.179673	0.005435	0.213768	0.568841	0.894928	1	0.003623	0.32971	0.512681	0.679348	0.998188	0.001812	0.188406	0.356884	0.67029	0.869565	0.748188	0.067029	0.184783	0.029038	0.043557	0	0.001812	0.311594	0.498188	0.684783	1	0.012681	0.134058	0.197464	0.230072	0.873188	0.028986	0.257246	0.802536	0.858696	0.994565	0.375	0.290381	0.007246	0.175725	0.396739	0.686594	0.994565	0.54529
0.236273	0.544093	0.219634	0.191667	0.115	0.213333	0.013311	0.207987	0.396007	0.640599	0.995008	0.003328	0.294509	0.559068	0.748752	1	0.001664	0.237937	0.439268	0.78203	0.998336	0.745424	0.129784	0.124792	0.053333	0.023333	0.01	0.001664	0.292845	0.562396	0.753744	1	0.006656	0.221298	0.356073	0.916805	0.996672	0.008319	0.141431	0.27787	0.420965	0.988353	0.613977	0.326667	0.004992	0.279534	0.514143	0.730449	0.998336	0.560732
0.431373	0.313725	0.254902	0.257426	0.257426	0.128713	0.019608	0.22549	0.45098	0.803922	0.990196	0.039216	0.323529	0.568627	0.696078	1	0.009804	0.137255	0.470588	0.77451	0.95098	0.264706	0.460784	0.27451	0.079208	0.039604	0	0.009804	0.147059	0.784314	0.931373	1	0.019608	0.362745	0.480392	0.617647	0.901961	0.156863	0.215686	0.284314	0.705882	0.77451	0.470588	0.39604	0.039216	0.215686	0.480392	0.696078	0.892157	0.323529
0.408333	0.233333	0.358333	0.168067	0.285714	0.084034	0.016667	0.291667	0.541667	0.775	0.958333	0.025	0.208333	0.4	0.725	0.975	0.008333	0.233333	0.516667	0.708333	1	0.375	0.266667	0.358333	0.10084	0.084034	0.016807	0.008333	0.333333	0.466667	0.808333	1	0.033333	0.291667	0.416667	0.533333	0.991667	0.125	0.2	0.583333	0.7	0.9	0.45	0.403361	0.033333	0.208333	0.483333	0.7	0.991667	0.233333
0.408163	0.29932	0.292517	0.232877	0.260274	0.19863	0.013605	0.258503	0.442177	0.748299	0.993197	0.088435	0.319728	0.564626	0.734694	1	0.006803	0.142857	0.469388	0.741497	0.979592	0.353741	0.312925	0.333333	0.130137	0.047945	0.006849	0.006803	0.142857	0.510204	0.748299	1	0.013605	0.244898	0.619048	0.891156	0.993197	0.170068	0.326531	0.408163	0.489796	0.829932	0.387755	0.479452	0.020408	0.204082	0.52381	0.727891	0.979592	0.306122
0.246753	0.470779	0.282468	0.214984	0.162866	0.276873	0.00974	0.237013	0.535714	0.766234	0.996753	0.006494	0.25974	0.483766	0.720779	1	0.003247	0.230519	0.474026	0.743506	0.987013	0.512987	0.288961	0.198052	0.114007	0.04886	0.009772	0.003247	0.246753	0.49026	0.75974	1	0.00974	0.279221	0.558442	0.727273	0.941558	0.035714	0.107143	0.396104	0.532468	0.993506	0.522727	0.371336	0.019481	0.327922	0.522727	0.75974	0.987013	0.461039
0.353712	0.371179	0.275109	0.219298	0.197368	0.201754	0.0131	0.174672	0.471616	0.768559	1	0.008734	0.218341	0.414847	0.68559	0.978166	0.004367	0.393013	0.580786	0.772926	0.9869	0.572052	0.270742	0.157205	0.083333	0.030702	0.004386	0.004367	0.231441	0.436681	0.759825	1	0.253275	0.449782	0.554585	0.812227	0.991266	0.117904	0.152838	0.19214	0.606987	0.847162	0.454148	0.359649	0.135371	0.318777	0.558952	0.746725	0.9869	0.393013
0.385714	0.404762	0.209524	0.282297	0.162679	0.177033	0.014286	0.204762	0.461905	0.719048	1	0.009524	0.242857	0.542857	0.790476	0.995238	0.004762	0.280952	0.490476	0.671429	0.97619	0.404762	0.119048	0.47619	0.057416	0.076555	0.009569	0.004762	0.1	0.261905	0.652381	1	0.133333	0.195238	0.628571	0.671429	0.938095	0.128571	0.4	0.552381	0.785714	0.990476	0.442857	0.430622	0.133333	0.342857	0.52381	0.742857	0.980952	0.419048
0.351682	0.316514	0.331804	0.192956	0.222052	0.217458	0.006116	0.262997	0.547401	0.750765	1	0.003058	0.233945	0.454128	0.698777	0.995413	0.001529	0.247706	0.486239	0.769113	0.990826	0.545872	0.172783	0.281346	0.07657	0.073507	0	0.001529	0.270642	0.550459	0.70948	1	0.067278	0.321101	0.602446	0.810398	0.990826	0.007645	0.17737	0.35474	0.732416	0.934251	0.5	0.352221	0.007645	0.233945	0.457187	0.785933	0.990826	0.334862
0.353952	0.358534	0.287514	0.248853	0.209862	0.207569	0.002291	0.271478	0.500573	0.735395	0.998855	0.005727	0.213058	0.429553	0.722795	0.996564	0.001145	0.280641	0.533792	0.778923	1	0.568156	0.106529	0.325315	0.040138	0.108945	0.008028	0.001145	0.186712	0.457045	0.739977	1	0.17984	0.616266	0.73425	0.799542	0.981672	0.005727	0.30126	0.467354	0.680412	0.973654	0.568156	0.383028	0.004582	0.183276	0.453608	0.737686	0.981672	0.363116
0.379791	0.324913	0.295296	0.236269	0.204882	0.186574	0.002613	0.189895	0.455575	0.749129	0.999129	0.001742	0.256969	0.506969	0.71777	1	0.000871	0.301394	0.539199	0.786585	0.994774	0.389373	0.12108	0.489547	0.040105	0.083697	0.001744	0.000871	0.267422	0.517422	0.766551	1	0.221254	0.341463	0.528746	0.813589	0.993902	0.010453	0.195993	0.459059	0.74216	0.981707	0.481707	0.322581	0.013066	0.319686	0.544425	0.762195	0.994774	0.355401
0.31358	0.346914	0.339506	0.211372	0.236094	0.236094	0.002469	0.261728	0.541975	0.765432	0.998765	0.004938	0.249383	0.460494	0.720988	0.993827	0.001235	0.225926	0.507407	0.744444	1	0.465432	0.246914	0.287654	0.100124	0.053152	0.003708	0.001235	0.208642	0.488889	0.749383	1	0.039506	0.2	0.409877	0.748148	0.998765	0.006173	0.316049	0.565432	0.693827	0.990123	0.55679	0.407911	0.003704	0.245679	0.462963	0.737037	0.996296	0.380247
0.442857	0.278571	0.278571	0.251799	0.266187	0.179856	0.021429	0.257143	0.5	0.792857	0.971429	0.05	0.2	0.507143	0.721429	0.992857	0.007143	0.242857	0.464286	0.728571	1	0.45	0.285714	0.264286	0.093525	0.079137	0.007194	0.007143	0.128571	0.457143	0.742857	1	0.021429	0.421429	0.585714	0.678571	0.792857	0.157143	0.214286	0.342857	0.857143	0.95	0.357143	0.460432	0.028571	0.307143	0.557143	0.714286	0.95	0.285714
0.33657	0.320388	0.343042	0.194805	0.224026	0.253247	0.006472	0.239482	0.504854	0.754045	1	0.012945	0.307443	0.533981	0.779935	0.990291	0.003236	0.213592	0.449838	0.711974	0.996764	0.501618	0.307443	0.190939	0.116883	0.045455	0.006494	0.003236	0.239482	0.511327	0.744337	1	0.009709	0.294498	0.543689	0.721683	0.990291	0.019417	0.084142	0.378641	0.76699	0.993528	0.537217	0.363636	0.012945	0.330097	0.530744	0.757282	0.996764	0.300971
0.293217	0.382932	0.323851	0.223684	0.221491	0.258772	0.017505	0.28884	0.544858	0.761488	1	0.004376	0.229759	0.47046	0.750547	0.984683	0.002188	0.234136	0.501094	0.719912	0.997812	0.380744	0.185996	0.43326	0.070175	0.100877	0.004386	0.002188	0.236324	0.527352	0.741794	1	0.094092	0.326039	0.483589	0.719912	0.995624	0.008753	0.205689	0.496718	0.761488	0.967177	0.573304	0.390351	0.008753	0.234136	0.477024	0.719912	0.991247	0.437637
0.334764	0.347639	0.317597	0.215517	0.211207	0.25	0.017167	0.309013	0.506438	0.738197	1	0.008584	0.23176	0.429185	0.716738	0.991416	0.004292	0.2103	0.527897	0.776824	0.995708	0.540773	0.27897	0.180258	0.094828	0.051724	0.008621	0.004292	0.167382	0.381974	0.622318	1	0.042918	0.334764	0.695279	0.793991	0.991416	0.021459	0.44206	0.540773	0.583691	0.961373	0.416309	0.396552	0.021459	0.227468	0.527897	0.776824	0.957082	0.347639
0.364641	0.290055	0.345304	0.185596	0.257618	0.202216	0.013812	0.20442	0.491713	0.712707	0.997238	0.041436	0.265193	0.541436	0.801105	0.991713	0.002762	0.232044	0.469613	0.709945	1	0.477901	0.151934	0.370166	0.077562	0.077562	0.01108	0.002762	0.160221	0.51105	0.825967	1	0.055249	0.383978	0.502762	0.853591	0.950276	0.005525	0.248619	0.455801	0.621547	0.848066	0.475138	0.398892	0.008287	0.301105	0.516575	0.781768	0.977901	0.262431
0.359844	0.380704	0.259452	0.249347	0.165796	0.184073	0.005215	0.284224	0.571056	0.837027	0.993481	0.002608	0.228162	0.507171	0.730117	0.994785	0.001304	0.237288	0.436767	0.649283	1	0.435463	0.11734	0.447197	0.049608	0.073107	0.005222	0.001304	0.249022	0.505867	0.756193	1	0.02086	0.241199	0.380704	0.542373	0.998696	0.039113	0.26206	0.550196	0.799218	0.986962	0.448501	0.336815	0.023468	0.209909	0.413299	0.601043	0.997392	0.422425
0.278245	0.489183	0.232572	0.243536	0.129886	0.230307	0.002404	0.246394	0.461538	0.798077	1	0.001202	0.278846	0.527043	0.740986	0.996394	0.000601	0.218149	0.451322	0.701322	0.998798	0.798077	0.061899	0.140024	0.036681	0.039086	0.003007	0.000601	0.289062	0.507212	0.715745	1	0.03125	0.220553	0.719952	0.859375	0.971154	0.001803	0.092548	0.28726	0.846154	0.998798	0.291466	0.340349	0.007212	0.167067	0.413462	0.751803	0.998798	0.521034
0.345638	0.295302	0.35906	0.198653	0.259259	0.239057	0.013423	0.234899	0.432886	0.758389	0.989933	0.026846	0.244966	0.567114	0.738255	0.996644	0.003356	0.241611	0.483221	0.721477	1	0.392617	0.157718	0.449664	0.057239	0.117845	0.003367	0.003356	0.174497	0.419463	0.684564	1	0.010067	0.268456	0.442953	0.637584	0.721477	0.026846	0.298658	0.536913	0.828859	0.989933	0.54698	0.397306	0.006711	0.244966	0.473154	0.671141	0.983221	0.332215
0.304997	0.390006	0.304997	0.224713	0.195977	0.227011	0.001149	0.275129	0.490523	0.7444	0.999426	0.001723	0.210224	0.469845	0.740953	0.998851	0.000574	0.257323	0.536473	0.757611	1	0.548535	0.161401	0.290063	0.071264	0.064368	0.011494	0.000574	0.179782	0.441126	0.741528	1	0.015508	0.31189	0.531304	0.761631	0.995405	0.00919	0.283171	0.57668	0.74842	0.98162	0.487076	0.402299	0.005744	0.247559	0.51637	0.757036	0.998277	0.402642
0.374652	0.264624	0.360724	0.205021	0.304045	0.188285	0.008357	0.252089	0.506964	0.747911	1	0.005571	0.267409	0.550139	0.770195	0.998607	0.001393	0.225627	0.456825	0.714485	0.997214	0.470752	0.231198	0.29805	0.090656	0.059972	0.001395	0.001393	0.203343	0.435933	0.71727	1	0.044568	0.194986	0.44429	0.834262	0.980501	0.006964	0.345404	0.558496	0.725627	0.994429	0.575209	0.421199	0.004178	0.253482	0.48468	0.743733	0.997214	0.275766
0.389937	0.36478	0.245283	0.259494	0.132911	0.196203	0.018868	0.150943	0.396226	0.660377	0.987421	0.012579	0.257862	0.572327	0.779874	0.993711	0.006289	0.358491	0.591195	0.754717	1	0.402516	0.106918	0.490566	0.037975	0.088608	0	0.006289	0.119497	0.283019	0.72956	1	0.522013	0.540881	0.704403	0.823899	0.855346	0.044025	0.327044	0.459119	0.666667	0.962264	0.440252	0.329114	0.188679	0.433962	0.603774	0.754717	0.974843	0.396226
0.283537	0.60061	0.115854	0.30687	0.083969	0.122137	0.007622	0.329268	0.5625	0.786585	0.996951	0.003049	0.190549	0.39939	0.722561	1	0.001524	0.527439	0.632622	0.806402	0.978659	0.862805	0.04878	0.088415	0.025954	0.025954	0.001527	0.001524	0.269817	0.48628	0.772866	1	0.07622	0.551829	0.608232	0.635671	0.817073	0.012195	0.088415	0.170732	0.640244	0.990854	0.527439	0.332824	0.009146	0.344512	0.612805	0.818598	0.978659	0.58689
0.33617	0.344681	0.319149	0.226496	0.200855	0.213675	0.012766	0.229787	0.455319	0.680851	0.987234	0.021277	0.246809	0.570213	0.774468	1	0.004255	0.255319	0.489362	0.719149	0.995745	0.485106	0.361702	0.153191	0.136752	0.034188	0	0.004255	0.225532	0.578723	0.782979	1	0.093617	0.412766	0.570213	0.757447	0.970213	0.017021	0.157447	0.195745	0.242553	0.480851	0.544681	0.384615	0.017021	0.289362	0.523404	0.761702	0.995745	0.353191
0.48125	0.275	0.24375	0.27044	0.238994	0.119497	0.01875	0.2375	0.51875	0.75625	1	0.0125	0.29375	0.54375	0.8	0.9875	0.00625	0.1625	0.4375	0.5625	0.95625	0.31875	0.175	0.50625	0.050314	0.075472	0.012579	0.00625	0.24375	0.4125	0.64375	1	0.025	0.0625	0.29375	0.375	0.575	0.1	0.4375	0.675	0.8	0.95625	0.4125	0.415094	0.025	0.1875	0.3875	0.55625	0.975	0.2375
0.391129	0.403226	0.205645	0.275304	0.190283	0.161943	0.012097	0.306452	0.540323	0.790323	1	0.008065	0.165323	0.5	0.717742	0.959677	0.004032	0.262097	0.423387	0.725806	0.979839	0.762097	0.104839	0.133065	0.040486	0.040486	0	0.004032	0.217742	0.560484	0.75	1	0.048387	0.185484	0.294355	0.350806	0.459677	0.221774	0.25	0.391129	0.895161	0.991935	0.407258	0.380567	0.016129	0.193548	0.395161	0.649194	0.979839	0.483871
0.428571	0.404762	0.166667	0.361446	0.180723	0.120482	0.02381	0.345238	0.630952	0.845238	1	0.035714	0.22619	0.416667	0.642857	0.97619	0.011905	0.142857	0.333333	0.607143	0.797619	0.630952	0.261905	0.107143	0.120482	0.024096	0	0.011905	0.22619	0.511905	0.833333	1	0.130952	0.178571	0.297619	0.428571	0.619048	0.678571	0.690476	0.714286	0.738095	0.77381	0.333333	0.361446	0.059524	0.261905	0.452381	0.547619	0.77381	0.464286
0.411765	0.309598	0.278638	0.26087	0.267081	0.167702	0.009288	0.244582	0.50774	0.798762	0.996904	0.006192	0.272446	0.473684	0.696594	0.96904	0.003096	0.232198	0.501548	0.721362	1	0.448916	0.151703	0.399381	0.055901	0.068323	0	0.003096	0.417957	0.640867	0.764706	1	0.099071	0.145511	0.393189	0.55418	0.869969	0.012384	0.20743	0.365325	0.795666	0.990712	0.396285	0.416149	0.021672	0.226006	0.408669	0.55418	0.98452	0.417957
0.400915	0.306402	0.292683	0.225954	0.206107	0.174046	0.009146	0.179878	0.448171	0.757622	1	0.003049	0.256098	0.47561	0.731707	0.993902	0.001524	0.342988	0.570122	0.76372	0.998476	0.286585	0.004573	0.708841	0.00458	0.117557	0.001527	0.001524	0.152439	0.484756	0.817073	1	0.02439	0.02439	0.02439	0.045732	0.047256	0.022866	0.286585	0.501524	0.731707	0.996951	0.507622	0.39084	0.006098	0.32622	0.525915	0.746951	0.996951	0.318598
0.289474	0.479532	0.230994	0.243402	0.173021	0.184751	0.035088	0.292398	0.52924	0.815789	0.997076	0.005848	0.254386	0.552632	0.710526	0.994152	0.002924	0.154971	0.347953	0.777778	1	0.532164	0.195906	0.27193	0.070381	0.064516	0	0.002924	0.207602	0.517544	0.725146	1	0.076023	0.365497	0.494152	0.842105	0.97076	0.008772	0.22807	0.461988	0.657895	0.929825	0.435673	0.375367	0.011696	0.295322	0.502924	0.760234	0.973684	0.491228
0.398649	0.297297	0.304054	0.244898	0.238095	0.14966	0.013514	0.22973	0.418919	0.716216	1	0.02027	0.297297	0.533784	0.844595	0.993243	0.006757	0.222973	0.5	0.702703	0.97973	0.25	0	0.75	0	0.108844	0	0.006757	0.263514	0.527027	0.797297	1	0	0	0	0	0	0.013514	0.216216	0.452703	0.716216	0.945946	0.513514	0.394558	0.027027	0.297297	0.52027	0.695946	0.905405	0.290541
0.284501	0.388535	0.326964	0.223404	0.210638	0.246809	0.006369	0.239915	0.494692	0.734607	0.985138	0.004246	0.2569	0.505308	0.753715	1	0.002123	0.235669	0.484076	0.7431	0.997877	0.392781	0.118896	0.488323	0.070213	0.112766	0.006383	0.002123	0.205945	0.526539	0.802548	1	0.048832	0.161359	0.473461	0.927813	0.997877	0.014862	0.278132	0.450106	0.66879	0.955414	0.55414	0.387234	0.008493	0.235669	0.435244	0.660297	0.995754	0.420382
0.365546	0.323529	0.310924	0.227848	0.223629	0.244726	0.008403	0.210084	0.462185	0.773109	1	0.021008	0.260504	0.487395	0.747899	0.991597	0.004202	0.252101	0.508403	0.722689	0.987395	0.420168	0.168067	0.411765	0.075949	0.059072	0	0.004202	0.344538	0.554622	0.710084	1	0.205882	0.352941	0.453782	0.647059	0.739496	0.029412	0.12605	0.466387	0.815126	0.983193	0.470588	0.455696	0.029412	0.285714	0.512605	0.714286	0.966387	0.323529
0.319635	0.328767	0.351598	0.229358	0.206422	0.229358	0.009132	0.242009	0.493151	0.762557	1	0.027397	0.255708	0.406393	0.634703	0.981735	0.004566	0.214612	0.575342	0.789954	0.986301	0.515982	0.173516	0.310502	0.073394	0.055046	0	0.004566	0.292237	0.420091	0.703196	1	0.009132	0.050228	0.13242	0.744292	0.931507	0.16895	0.242009	0.579909	0.808219	0.986301	0.506849	0.394495	0.013699	0.242009	0.52968	0.785388	0.986301	0.310502
0.339515	0.378031	0.282454	0.25	0.207143	0.202857	0.012839	0.286733	0.510699	0.758916	0.99572	0.002853	0.18117	0.456491	0.724679	1	0.001427	0.300999	0.504993	0.74465	0.998573	0.60485	0.151213	0.243937	0.072857	0.064286	0.001429	0.001427	0.172611	0.413695	0.723252	1	0.108417	0.368046	0.550642	0.850214	0.950071	0.192582	0.356633	0.523538	0.78602	0.998573	0.467903	0.411429	0.008559	0.299572	0.526391	0.764622	0.994294	0.398003
0.411765	0.285714	0.302521	0.271186	0.245763	0.169492	0.042017	0.252101	0.546218	0.697479	1	0.02521	0.243697	0.521008	0.789916	0.941176	0.008403	0.210084	0.420168	0.722689	0.983193	0.428571	0.243697	0.327731	0.084746	0.067797	0	0.008403	0.184874	0.462185	0.647059	1	0.243697	0.294118	0.394958	0.470588	0.554622	0.067227	0.134454	0.747899	0.865546	0.983193	0.411765	0.474576	0.05042	0.268908	0.478992	0.739496	0.97479	0.327731
0.353646	0.328671	0.317682	0.238	0.229	0.198	0.008991	0.238761	0.481518	0.728272	1	0.001998	0.265734	0.511489	0.759241	0.995005	0.000999	0.234765	0.501499	0.737263	0.999001	0.458541	0.217782	0.323676	0.078	0.068	0.008	0.000999	0.257742	0.460539	0.696304	1	0.021978	0.317682	0.54046	0.751249	0.999001	0.007992	0.201798	0.585415	0.783217	0.989011	0.527473	0.36	0.002997	0.258741	0.548452	0.766234	0.998002	0.36963
0.350087	0.393414	0.256499	0.25	0.177083	0.204861	0.003466	0.279029	0.558059	0.759099	0.998267	0.008666	0.256499	0.461005	0.738302	0.996534	0.001733	0.214905	0.462738	0.740035	1	0.686308	0.117851	0.195841	0.059028	0.072917	0.003472	0.001733	0.275563	0.485269	0.7487	1	0.005199	0.155979	0.379549	0.655113	0.911612	0.031196	0.140381	0.544194	0.897747	0.991334	0.403813	0.399306	0.005199	0.239168	0.516464	0.783362	0.986135	0.40208
0.325815	0.333333	0.340852	0.231156	0.223618	0.211055	0.007519	0.265664	0.513784	0.746867	1	0.005013	0.20802	0.518797	0.749373	0.997494	0.002506	0.225564	0.458647	0.736842	0.989975	0.338346	0.150376	0.511278	0.080402	0.095477	0.005025	0.002506	0.20802	0.54386	0.802005	1	0.045113	0.288221	0.538847	0.949875	0.992481	0.010025	0.26817	0.453634	0.714286	0.889724	0.596491	0.366834	0.012531	0.24812	0.471178	0.671679	0.987469	0.340852
0.390909	0.236364	0.372727	0.229358	0.275229	0.155963	0.036364	0.2	0.518182	0.727273	1	0.018182	0.145455	0.381818	0.581818	0.981818	0.009091	0.3	0.527273	0.772727	0.990909	0.363636	0.263636	0.372727	0.082569	0.100917	0.009174	0.009091	0.127273	0.454545	0.763636	1	0.390909	0.481818	0.8	0.872727	0.963636	0.027273	0.181818	0.318182	0.590909	0.7	0.4	0.366972	0.045455	0.4	0.590909	0.854545	0.972727	0.245455
0.47166	0.42915	0.09919	0.509128	0.103448	0.048682	0.006073	0.287449	0.550607	0.755061	0.997976	0.004049	0.279352	0.520243	0.787449	1	0.002024	0.078947	0.216599	0.309717	0.919028	0.789474	0.115385	0.095142	0.044625	0.024341	0	0.002024	0.38664	0.58502	0.793522	1	0.006073	0.078947	0.214575	0.291498	0.62753	0.030364	0.091093	0.240891	0.311741	0.84413	0.157895	0.154158	0.008097	0.080972	0.216599	0.275304	0.821862	0.431174
0.333913	0.422609	0.243478	0.25784	0.160279	0.210801	0.003478	0.24	0.45913	0.72	0.998261	0.02087	0.290435	0.516522	0.77913	1	0.001739	0.215652	0.493913	0.713043	0.982609	0.593043	0.102609	0.304348	0.04878	0.04878	0.003484	0.001739	0.351304	0.535652	0.787826	1	0.113043	0.584348	0.65913	0.758261	0.866087	0.008696	0.092174	0.215652	0.615652	0.996522	0.427826	0.379791	0.012174	0.226087	0.594783	0.782609	0.982609	0.426087
0.307087	0.401575	0.291339	0.27668	0.15415	0.245059	0.043307	0.220472	0.519685	0.755906	1	0.007874	0.275591	0.507874	0.771654	0.988189	0.003937	0.23622	0.472441	0.669291	0.992126	0.326772	0.102362	0.570866	0.039526	0.102767	0	0.003937	0.188976	0.448819	0.767717	1	0.011811	0.031496	0.80315	0.858268	0.893701	0.070866	0.295276	0.492126	0.649606	0.988189	0.503937	0.339921	0.011811	0.259843	0.437008	0.649606	0.992126	0.409449
0.330855	0.360595	0.30855	0.208955	0.208955	0.227612	0.01487	0.178439	0.431227	0.70632	0.992565	0.007435	0.297398	0.546468	0.810409	1	0.003717	0.260223	0.505576	0.69145	0.98513	0.457249	0.200743	0.342007	0.093284	0.070896	0.011194	0.003717	0.289963	0.505576	0.851301	1	0.122677	0.315985	0.486989	0.672862	0.907063	0.011152	0.104089	0.449814	0.713755	0.914498	0.531599	0.395522	0.02974	0.315985	0.498141	0.69145	0.98513	0.405204
0.388	0.466	0.146	0.380762	0.114228	0.116232	0.006	0.194	0.418	0.67	1	0.004	0.238	0.488	0.77	0.996	0.002	0.526	0.658	0.812	0.998	0.6	0.154	0.246	0.062124	0.058116	0.002004	0.002	0.292	0.514	0.802	1	0.192	0.396	0.592	0.786	0.88	0.026	0.12	0.364	0.628	0.852	0.36	0.336673	0.026	0.286	0.584	0.818	0.998	0.514
0.422269	0.302521	0.27521	0.231579	0.233684	0.16	0.006303	0.222689	0.44958	0.726891	1	0.004202	0.210084	0.504202	0.737395	0.989496	0.002101	0.367647	0.569328	0.773109	0.991597	0.489496	0.117647	0.392857	0.046316	0.08	0.004211	0.002101	0.189076	0.430672	0.733193	1	0.184874	0.531513	0.602941	0.72479	0.821429	0.010504	0.313025	0.489496	0.802521	0.993697	0.434874	0.336842	0.014706	0.42437	0.605042	0.777311	0.991597	0.338235
0.477273	0.329545	0.193182	0.333333	0.172414	0.091954	0.034091	0.193182	0.420455	0.715909	0.954545	0.022727	0.25	0.556818	0.772727	1	0.011364	0.318182	0.545455	0.647727	0.943182	0.215909	0	0.784091	0	0.068966	0	0.011364	0.045455	0.727273	0.784091	1	0	0	0	0	0	0.090909	0.284091	0.477273	0.670455	0.965909	0.306818	0.413793	0.045455	0.363636	0.534091	0.659091	0.943182	0.352273
0.329412	0.4	0.270588	0.22619	0.22619	0.22619	0.035294	0.294118	0.517647	0.682353	0.988235	0.023529	0.188235	0.435294	0.776471	0.976471	0.011765	0.164706	0.458824	0.670588	1	0.529412	0.258824	0.211765	0.142857	0.047619	0	0.011765	0.2	0.517647	0.788235	1	0.070588	0.552941	0.647059	0.764706	0.941176	0.141176	0.235294	0.294118	0.341176	0.4	0.447059	0.52381	0.058824	0.270588	0.6	0.776471	0.952941	0.329412
0.457143	0.285714	0.257143	0.259615	0.192308	0.163462	0.019048	0.142857	0.428571	0.752381	1	0.028571	0.4	0.6	0.828571	0.990476	0.009524	0.238095	0.438095	0.685714	0.857143	0.714286	0.028571	0.257143	0.038462	0.038462	0	0.009524	0.171429	0.457143	0.819048	1	0.257143	0.257143	0.257143	0.266667	0.438095	0.314286	0.361905	0.571429	0.638095	0.704762	0.32381	0.384615	0.171429	0.342857	0.561905	0.695238	0.904762	0.295238
0.463158	0.305263	0.231579	0.287234	0.212766	0.138298	0.031579	0.178947	0.421053	0.631579	1	0.021053	0.4	0.642105	0.810526	0.989474	0.010526	0.252632	0.463158	0.694737	0.926316	0.2	0.010526	0.789474	0.021277	0.06383	0	0.010526	0.431579	0.694737	0.947368	1	0.705263	0.705263	0.705263	0.705263	0.705263	0.042105	0.221053	0.421053	0.652632	0.926316	0.273684	0.382979	0.042105	0.336842	0.568421	0.694737	0.926316	0.336842
0.3475	0.305	0.3475	0.20802	0.245614	0.213033	0.01	0.2775	0.505	0.7875	1	0.0075	0.19	0.43	0.705	0.9975	0.0025	0.2625	0.5225	0.7625	0.985	0.345	0.0925	0.5625	0.0401	0.120301	0.005013	0.0025	0.225	0.425	0.735	1	0.055	0.115	0.1975	0.29	0.36	0.01	0.4	0.5875	0.775	0.985	0.545	0.41604	0.015	0.27	0.4625	0.6975	0.98	0.31
0.319088	0.413105	0.267806	0.205714	0.182857	0.222857	0.017094	0.299145	0.501425	0.672365	0.980057	0.005698	0.262108	0.509972	0.792023	0.991453	0.002849	0.19943	0.444444	0.698006	1	0.723647	0.193732	0.082621	0.085714	0.034286	0.005714	0.002849	0.296296	0.561254	0.777778	1	0.079772	0.148148	0.267806	0.358974	0.917379	0.008547	0.45584	0.481481	0.940171	0.962963	0.452991	0.308571	0.014245	0.239316	0.501425	0.774929	0.982906	0.421652
0.392321	0.305509	0.30217	0.250836	0.225753	0.190635	0.021703	0.228715	0.465776	0.737896	1	0.005008	0.230384	0.504174	0.786311	0.998331	0.001669	0.287145	0.517529	0.729549	0.996661	0.347245	0.038397	0.614357	0.018395	0.091973	0.005017	0.001669	0.328881	0.616027	0.891486	1	0.006678	0.016694	0.131886	0.434057	0.813022	0.026711	0.24374	0.492487	0.686144	0.994992	0.462437	0.367893	0.005008	0.235392	0.470785	0.702838	0.996661	0.307179
0.286371	0.502297	0.211332	0.216258	0.130368	0.187117	0.009188	0.165391	0.349158	0.575804	0.996937	0.003063	0.385911	0.601838	0.784074	1	0.001531	0.229709	0.41807	0.727412	0.993874	0.75804	0.056662	0.185299	0.027607	0.030675	0.003067	0.001531	0.304747	0.578867	0.784074	1	0.047473	0.211332	0.266462	0.316998	0.709035	0.070444	0.160796	0.333844	0.477795	0.911179	0.431853	0.328221	0.01072	0.267994	0.520674	0.686064	0.993874	0.513017
0.314488	0.353357	0.332155	0.234043	0.219858	0.244681	0.010601	0.282686	0.597173	0.809187	0.996466	0.007067	0.243816	0.466431	0.738516	1	0.003534	0.212014	0.434629	0.628975	0.985866	0.533569	0.332155	0.134276	0.113475	0.042553	0.014184	0.003534	0.293286	0.611307	0.826855	1	0.021201	0.257951	0.399293	0.572438	0.968198	0.045936	0.088339	0.469965	0.696113	0.742049	0.452297	0.411348	0.014134	0.261484	0.448763	0.600707	0.992933	0.416961
0.29918	0.393443	0.307377	0.255144	0.160494	0.263374	0.028689	0.204918	0.512295	0.77459	1	0.008197	0.282787	0.528689	0.766393	0.987705	0.004098	0.229508	0.430328	0.639344	0.995902	0.368852	0.102459	0.528689	0.032922	0.074074	0	0.004098	0.168033	0.454918	0.778689	1	0.418033	0.75	0.77459	0.827869	0.864754	0.032787	0.237705	0.483607	0.622951	0.959016	0.483607	0.353909	0.012295	0.237705	0.487705	0.672131	0.995902	0.393443
0.435685	0.360996	0.20332	0.333333	0.229167	0.158333	0.012448	0.278008	0.502075	0.738589	1	0.008299	0.224066	0.460581	0.717842	0.995851	0.004149	0.232365	0.489627	0.780083	0.991701	0.585062	0.120332	0.294606	0.075	0.091667	0	0.004149	0.319502	0.560166	0.717842	1	0.058091	0.33195	0.763485	0.846473	0.991701	0.020747	0.161826	0.26556	0.692946	0.929461	0.340249	0.466667	0.062241	0.273859	0.59751	0.792531	0.991701	0.410788
0.335821	0.380597	0.283582	0.293233	0.18797	0.233083	0.037313	0.246269	0.455224	0.701493	0.985075	0.014925	0.223881	0.514925	0.723881	0.977612	0.007463	0.238806	0.5	0.768657	1	0.373134	0.350746	0.276119	0.172932	0.052632	0.007519	0.007463	0.328358	0.559701	0.723881	1	0.179104	0.380597	0.552239	0.813433	0.992537	0.037313	0.097015	0.246269	0.313433	0.91791	0.477612	0.406015	0.037313	0.246269	0.567164	0.791045	0.992537	0.373134
0.301887	0.40566	0.292453	0.251185	0.227488	0.21327	0.009434	0.221698	0.438679	0.669811	1	0.014151	0.240566	0.570755	0.84434	0.990566	0.004717	0.287736	0.495283	0.660377	0.886792	0.438679	0.363208	0.198113	0.127962	0.07109	0.004739	0.004717	0.273585	0.570755	0.783019	1	0.018868	0.283019	0.438679	0.613208	0.858491	0.080189	0.216981	0.556604	0.900943	0.985849	0.40566	0.454976	0.023585	0.245283	0.448113	0.660377	0.929245	0.415094
0.293566	0.412869	0.293566	0.237584	0.17047	0.245638	0.012064	0.219839	0.461126	0.706434	0.993298	0.002681	0.245308	0.5	0.773458	0.99866	0.00134	0.272118	0.522788	0.75067	1	0.580429	0.143432	0.276139	0.061745	0.051007	0	0.00134	0.189008	0.411528	0.702413	1	0.005362	0.422252	0.630027	0.74933	0.99866	0.030831	0.266756	0.512064	0.806971	0.990617	0.462466	0.327517	0.005362	0.344504	0.591153	0.774799	0.997319	0.41555
0.410909	0.250909	0.338182	0.222628	0.30292	0.164234	0.010909	0.250909	0.516364	0.796364	0.996364	0.014545	0.247273	0.505455	0.636364	0.992727	0.003636	0.218182	0.447273	0.734545	1	0.370909	0.174545	0.454545	0.051095	0.080292	0	0.003636	0.189091	0.425455	0.672727	1	0.12	0.283636	0.363636	0.567273	0.658182	0.021818	0.254545	0.698182	0.821818	0.985455	0.545455	0.408759	0.029091	0.232727	0.454545	0.654545	0.978182	0.261818
0.382609	0.365217	0.252174	0.27193	0.219298	0.105263	0.017391	0.234783	0.426087	0.695652	0.973913	0.113043	0.382609	0.652174	0.852174	1	0.008696	0.104348	0.356522	0.6	0.913043	0.443478	0.478261	0.078261	0.175439	0.017544	0	0.008696	0.165217	0.452174	0.678261	1	0.069565	0.217391	0.382609	0.695652	0.878261	0.913043	0.921739	0.93913	0.956522	0.982609	0.443478	0.333333	0.026087	0.226087	0.495652	0.626087	0.965217	0.408696
0.451282	0.317949	0.230769	0.319588	0.170103	0.154639	0.010256	0.312821	0.6	0.789744	1	0.015385	0.271795	0.502564	0.758974	0.989744	0.005128	0.184615	0.34359	0.512821	0.979487	0.74359	0.158974	0.097436	0.072165	0.051546	0.010309	0.005128	0.297436	0.6	0.805128	1	0.148718	0.220513	0.353846	0.420513	0.851282	0.05641	0.071795	0.138462	0.569231	0.641026	0.34359	0.268041	0.020513	0.169231	0.312821	0.507692	0.897436	0.374359
0.36831	0.307746	0.323944	0.212121	0.230444	0.206483	0.001408	0.234507	0.45	0.734507	0.999296	0.002113	0.273944	0.529577	0.748592	0.997183	0.000704	0.247183	0.505634	0.764789	1	0.538732	0.35493	0.106338	0.11346	0.03876	0.007752	0.000704	0.249296	0.502817	0.716901	1	0.009155	0.232394	0.467606	0.740141	0.933099	0.002113	0.25	0.673239	0.95493	0.998592	0.585915	0.283298	0.002113	0.25493	0.494366	0.761972	0.997887	0.347183
0.418367	0.340136	0.241497	0.279863	0.221843	0.177474	0.013605	0.248299	0.527211	0.772109	1	0.006803	0.261905	0.486395	0.714286	0.982993	0.003401	0.207483	0.455782	0.738095	0.962585	0.612245	0.20068	0.187075	0.081911	0.054608	0.006826	0.003401	0.261905	0.496599	0.663265	1	0.020408	0.285714	0.639456	0.812925	0.931973	0.013605	0.183673	0.336735	0.843537	0.986395	0.346939	0.327645	0.027211	0.241497	0.557823	0.758503	0.962585	0.380952
0.450382	0.423664	0.125954	0.494253	0.118774	0.091954	0.01145	0.278626	0.496183	0.721374	0.984733	0.007634	0.335878	0.576336	0.805344	1	0.003817	0.114504	0.21374	0.30916	0.969466	0.820611	0.103053	0.076336	0.045977	0.015326	0	0.003817	0.377863	0.583969	0.793893	1	0.041985	0.141221	0.206107	0.301527	0.729008	0.087786	0.103053	0.122137	0.248092	0.267176	0.236641	0.252874	0.038168	0.156489	0.290076	0.522901	0.977099	0.412214
0.383356	0.326057	0.290587	0.25	0.229508	0.173497	0.005457	0.236016	0.523874	0.793997	1	0.002729	0.249659	0.492497	0.731241	0.995907	0.001364	0.255116	0.457026	0.698499	0.997271	0.480218	0.060027	0.459754	0.02459	0.095628	0.010929	0.001364	0.244202	0.476126	0.806276	1	0.155525	0.321965	0.357435	0.854025	0.897681	0.00955	0.229195	0.515689	0.695771	0.986357	0.432469	0.423497	0.008186	0.276944	0.435198	0.658936	0.994543	0.342428
0.483221	0.278523	0.238255	0.228956	0.232323	0.141414	0.013423	0.197987	0.496644	0.761745	1	0.006711	0.248322	0.520134	0.795302	0.996644	0.003356	0.291946	0.479866	0.677852	0.939597	0.520134	0.134228	0.345638	0.047138	0.080808	0.013468	0.003356	0.157718	0.449664	0.738255	1	0.325503	0.456376	0.61745	0.674497	0.919463	0.013423	0.278523	0.503356	0.802013	0.95302	0.305369	0.296296	0.020134	0.318792	0.459732	0.66443	0.942953	0.338926
0.368182	0.377273	0.254545	0.296804	0.187215	0.173516	0.031818	0.263636	0.536364	0.772727	0.981818	0.013636	0.236364	0.559091	0.818182	1	0.004545	0.209091	0.422727	0.590909	0.986364	0.463636	0.2	0.336364	0.082192	0.073059	0.009132	0.004545	0.386364	0.718182	0.881818	1	0.013636	0.168182	0.413636	0.595455	0.659091	0.031818	0.227273	0.313636	0.554545	0.854545	0.336364	0.438356	0.009091	0.181818	0.431818	0.627273	0.986364	0.440909
0.360963	0.374332	0.264706	0.240964	0.172691	0.200803	0.002674	0.351604	0.627005	0.846257	1	0.004011	0.195187	0.457219	0.687166	0.991979	0.001337	0.233957	0.426471	0.660428	0.998663	0.442513	0.114973	0.442513	0.041499	0.111111	0.004016	0.001337	0.217914	0.498663	0.768717	1	0.073529	0.207219	0.34893	0.502674	0.973262	0.020053	0.292781	0.584225	0.804813	0.966578	0.450535	0.337349	0.004011	0.205882	0.419786	0.602941	0.994652	0.391711
0.321513	0.420804	0.257683	0.263033	0.14455	0.222749	0.004728	0.385343	0.531915	0.756501	0.973995	0.007092	0.156028	0.371158	0.725768	1	0.002364	0.3026	0.536643	0.768322	0.997636	0.631206	0.101655	0.267139	0.106635	0.07346	0.00237	0.002364	0.200946	0.510638	0.747045	1	0.104019	0.189125	0.375887	0.607565	0.992908	0.047281	0.345154	0.503546	0.758865	0.983452	0.3026	0.50237	0.018913	0.27896	0.524823	0.754137	0.985816	0.439716
0.330882	0.404412	0.264706	0.251852	0.185185	0.177778	0.014706	0.286765	0.514706	0.705882	1	0.022059	0.235294	0.448529	0.757353	0.992647	0.007353	0.205882	0.470588	0.654412	0.919118	0.316176	0.139706	0.544118	0.044444	0.074074	0	0.007353	0.110294	0.301471	0.617647	1	0.242647	0.264706	0.352941	0.632353	0.669118	0.044118	0.419118	0.558824	0.801471	0.941176	0.404412	0.340741	0.051471	0.338235	0.507353	0.683824	0.919118	0.419118
0.454545	0.222222	0.323232	0.244898	0.357143	0.081633	0.020202	0.252525	0.454545	0.727273	1	0.030303	0.333333	0.565657	0.666667	0.949495	0.010101	0.171717	0.383838	0.777778	0.979798	0.353535	0.272727	0.373737	0.081633	0.061224	0	0.010101	0.080808	0.434343	0.626263	1	0.10101	0.151515	0.525253	0.646465	0.717172	0.242424	0.323232	0.757576	0.848485	0.979798	0.484848	0.428571	0.050505	0.222222	0.555556	0.777778	0.979798	0.161616
0.376068	0.367521	0.25641	0.301724	0.198276	0.172414	0.025641	0.264957	0.470085	0.675214	0.991453	0.017094	0.25641	0.564103	0.871795	1	0.008547	0.179487	0.452991	0.623932	0.854701	0.521368	0.384615	0.094017	0.094828	0.043103	0.008621	0.008547	0.376068	0.555556	0.854701	1	0.034188	0.17094	0.307692	0.504274	0.692308	0.666667	0.675214	0.74359	0.769231	0.871795	0.376068	0.534483	0.051282	0.188034	0.470085	0.65812	0.897436	0.367521
0.300885	0.40708	0.292035	0.214286	0.196429	0.205357	0.026549	0.19469	0.566372	0.831858	0.982301	0.017699	0.212389	0.389381	0.646018	1	0.00885	0.353982	0.548673	0.752212	0.99115	0.451327	0.212389	0.336283	0.089286	0.035714	0	0.00885	0.106195	0.300885	0.557522	1	0.132743	0.230088	0.371681	0.548673	0.628319	0.389381	0.681416	0.769912	0.849558	0.938053	0.362832	0.375	0.070796	0.274336	0.415929	0.610619	0.938053	0.415929
0.390977	0.315789	0.293233	0.265152	0.181818	0.219697	0.022556	0.24812	0.518797	0.75188	1	0.015038	0.210526	0.458647	0.721805	0.969925	0.007519	0.270677	0.473684	0.729323	0.924812	0.300752	0.360902	0.338346	0.045455	0.060606	0.015152	0.007519	0.105263	0.323308	0.609023	1	0.150376	0.654135	0.744361	0.849624	0.93985	0.06015	0.278195	0.390977	0.511278	0.631579	0.421053	0.439394	0.150376	0.308271	0.526316	0.736842	0.924812	0.323308
0.392135	0.267416	0.340449	0.208099	0.271091	0.1991	0.004494	0.17191	0.408989	0.721348	0.998876	0.002247	0.295506	0.519101	0.793258	0.988764	0.001124	0.303371	0.540449	0.766292	1	0.333708	0.094382	0.57191	0.035996	0.094488	0.008999	0.001124	0.224719	0.41573	0.810112	1	0.053933	0.330337	0.742697	0.907865	0.988764	0.003371	0.25618	0.486517	0.704494	0.997753	0.558427	0.418448	0.003371	0.34382	0.546067	0.766292	0.996629	0.28764
0.37051	0.321361	0.308129	0.210227	0.263258	0.193182	0.005671	0.272212	0.533081	0.754253	0.996219	0.003781	0.258979	0.489603	0.727788	1	0.00189	0.20794	0.47259	0.746692	0.99811	0.451796	0.177694	0.37051	0.087121	0.081439	0.001894	0.00189	0.336484	0.534972	0.786389	0.994329	0.069943	0.440454	0.759924	0.858223	1	0.013233	0.181474	0.325142	0.565217	0.931947	0.531191	0.390152	0.009452	0.221172	0.406427	0.708885	0.99811	0.342155
0.385629	0.337725	0.276647	0.272182	0.201439	0.183453	0.003593	0.235928	0.51497	0.776048	1	0.002395	0.273054	0.535329	0.760479	0.998802	0.001198	0.233533	0.432335	0.674251	0.972455	0.486228	0.203593	0.31018	0.07554	0.063549	0.003597	0.001198	0.247904	0.523353	0.832335	1	0.086228	0.202395	0.427545	0.790419	0.877844	0.010778	0.300599	0.51497	0.693413	0.958084	0.474251	0.338129	0.005988	0.25988	0.456287	0.673054	0.966467	0.354491
0.437427	0.290058	0.272515	0.203747	0.237705	0.168618	0.003509	0.197661	0.490058	0.792982	1	0.004678	0.28538	0.511111	0.727485	0.997661	0.00117	0.28655	0.493567	0.701754	0.988304	0.490058	0.139181	0.37076	0.052693	0.07377	0.005855	0.00117	0.180117	0.397661	0.697076	1	0.003509	0.239766	0.449123	0.592982	0.739181	0.016374	0.375439	0.633918	0.847953	0.989474	0.425731	0.332553	0.005848	0.326316	0.504094	0.698246	0.988304	0.327485
0.359801	0.26799	0.372208	0.190062	0.277019	0.224845	0.006203	0.248139	0.522333	0.751861	0.998759	0.004963	0.258065	0.486352	0.734491	0.980149	0.001241	0.241935	0.495037	0.754342	1	0.48139	0.222084	0.296526	0.095652	0.055901	0.003727	0.001241	0.210918	0.451613	0.736973	1	0.040943	0.183623	0.426799	0.800248	0.997519	0.006203	0.332506	0.554591	0.7134	0.991315	0.57072	0.404969	0.003722	0.244417	0.478908	0.743176	0.997519	0.290323
0.431818	0.272727	0.295455	0.172414	0.252874	0.195402	0.045455	0.215909	0.511364	0.715909	1	0.034091	0.25	0.465909	0.761364	0.897727	0.011364	0.159091	0.454545	0.738636	0.977273	0.261364	0	0.738636	0	0.091954	0	0.011364	0.170455	0.238636	0.545455	1	0	0	0	0	0	0.045455	0.329545	0.568182	0.75	0.954545	0.386364	0.413793	0.079545	0.306818	0.477273	0.704545	0.954545	0.25
0.365385	0.326923	0.307692	0.223301	0.281553	0.194175	0.019231	0.240385	0.480769	0.711538	0.990385	0.086538	0.25	0.567308	0.778846	1	0.009615	0.182692	0.461538	0.692308	0.961538	0.413462	0.298077	0.288462	0.106796	0.048544	0.009709	0.009615	0.288462	0.663462	0.798077	1	0.115385	0.365385	0.625	0.836538	0.961538	0.028846	0.144231	0.221154	0.461538	0.538462	0.346154	0.38835	0.028846	0.153846	0.413462	0.625	0.961538	0.336538
0.357942	0.328859	0.313199	0.226457	0.235426	0.215247	0.004474	0.234899	0.47651	0.758389	0.997763	0.008949	0.279642	0.52349	0.744966	1	0.002237	0.210291	0.480984	0.749441	0.991051	0.389262	0.120805	0.489933	0.053812	0.089686	0.004484	0.002237	0.395973	0.581655	0.780761	1	0.404922	0.57047	0.686801	0.847875	0.995526	0.011186	0.147651	0.322148	0.606264	0.98434	0.590604	0.331839	0.013423	0.232662	0.503356	0.711409	0.991051	0.357942
0.30491	0.310078	0.385013	0.183938	0.243523	0.246114	0.01292	0.193798	0.49354	0.764858	1	0.005168	0.312661	0.498708	0.74677	0.981912	0.002584	0.22739	0.490956	0.731266	0.992248	0.356589	0.217054	0.426357	0.080311	0.069948	0.002591	0.002584	0.22739	0.459948	0.795866	1	0.02584	0.206718	0.397933	0.537468	0.901809	0.064599	0.320413	0.607235	0.775194	0.992248	0.594315	0.414508	0.020672	0.286822	0.50646	0.741602	0.992248	0.322997
0.389831	0.305085	0.305085	0.222222	0.273504	0.145299	0.025424	0.262712	0.508475	0.720339	0.991525	0.059322	0.372881	0.584746	0.822034	1	0.008475	0.161017	0.347458	0.669492	0.898305	0.423729	0.245763	0.330508	0.08547	0.051282	0	0.008475	0.254237	0.576271	0.737288	1	0.033898	0.220339	0.440678	0.542373	0.694915	0.101695	0.169492	0.364407	0.830508	0.915254	0.389831	0.410256	0.033898	0.211864	0.449153	0.728814	0.923729	0.254237
0.378049	0.292683	0.329268	0.259259	0.209877	0.160494	0.04878	0.256098	0.487805	0.695122	0.95122	0.060976	0.146341	0.463415	0.792683	0.97561	0.012195	0.195122	0.47561	0.768293	1	0.353659	0.304878	0.341463	0.098765	0.074074	0	0.012195	0.329268	0.560976	0.829268	1	0.036585	0.268293	0.585366	0.658537	0.804878	0.121951	0.195122	0.426829	0.512195	0.939024	0.414634	0.518519	0.036585	0.158537	0.463415	0.646341	0.963415	0.304878
0.345997	0.324288	0.329715	0.230978	0.244565	0.221467	0.006784	0.230665	0.472185	0.721845	0.998643	0.002714	0.279512	0.529172	0.759837	1	0.001357	0.240163	0.49118	0.750339	0.997286	0.423338	0.162822	0.41384	0.065217	0.081522	0.002717	0.001357	0.240163	0.483039	0.735414	1	0.004071	0.189959	0.438263	0.616011	0.87517	0.017639	0.255088	0.56445	0.793758	0.967436	0.556309	0.388587	0.004071	0.283582	0.515604	0.729986	0.987788	0.34057
0.366306	0.346213	0.287481	0.232198	0.19969	0.198142	0.021638	0.318393	0.619784	0.843895	1	0.003091	0.18238	0.462133	0.695518	0.995363	0.001546	0.222566	0.446677	0.658423	0.982998	0.446677	0.125193	0.42813	0.049536	0.080495	0.003096	0.001546	0.242658	0.542504	0.771252	1	0.097372	0.238022	0.386399	0.528594	0.982998	0.035549	0.248841	0.514683	0.791345	0.967543	0.459042	0.356037	0.027821	0.216383	0.418856	0.598145	0.982998	0.378671
0.272727	0.570707	0.156566	0.340102	0.086294	0.19797	0.025253	0.232323	0.555556	0.808081	0.994949	0.010101	0.20202	0.414141	0.686869	0.984848	0.005051	0.459596	0.646465	0.777778	1	0.666667	0.181818	0.151515	0.060914	0.030457	0	0.005051	0.181818	0.358586	0.747475	1	0.343434	0.414141	0.5	0.722222	0.89899	0.090909	0.611111	0.651515	0.808081	0.848485	0.378788	0.314721	0.10101	0.429293	0.540404	0.727273	0.944444	0.565657
0.387352	0.304348	0.3083	0.222222	0.238095	0.174603	0.011858	0.26087	0.505929	0.699605	0.972332	0.007905	0.245059	0.474308	0.750988	0.996047	0.003953	0.197628	0.517787	0.802372	1	0.407115	0.26087	0.332016	0.09127	0.059524	0.003968	0.003953	0.328063	0.525692	0.640316	1	0.011858	0.300395	0.743083	0.889328	0.988142	0.055336	0.150198	0.458498	0.667984	0.818182	0.41502	0.380952	0.011858	0.201581	0.399209	0.802372	0.988142	0.312253
0.378571	0.360714	0.260714	0.25448	0.175627	0.215054	0.014286	0.307143	0.646429	0.825	0.992857	0.010714	0.192857	0.428571	0.625	1	0.003571	0.25	0.460714	0.725	0.989286	0.407143	0.128571	0.464286	0.046595	0.075269	0.003584	0.003571	0.189286	0.375	0.589286	1	0.082143	0.214286	0.314286	0.439286	0.739286	0.010714	0.464286	0.646429	0.860714	0.978571	0.364286	0.336918	0.028571	0.221429	0.428571	0.639286	0.989286	0.35
0.311558	0.386935	0.301508	0.20202	0.207071	0.232323	0.060302	0.211055	0.422111	0.738693	1	0.01005	0.286432	0.582915	0.809045	0.974874	0.005025	0.201005	0.427136	0.663317	0.994975	0.638191	0.100503	0.261307	0.050505	0.080808	0	0.005025	0.286432	0.552764	0.788945	1	0.015075	0.035176	0.105528	0.326633	0.623116	0.120603	0.211055	0.427136	0.733668	0.934673	0.457286	0.414141	0.020101	0.251256	0.542714	0.748744	0.974874	0.396985
0.348115	0.341463	0.310421	0.206667	0.242222	0.195556	0.008869	0.305987	0.536585	0.747228	0.986696	0.004435	0.179601	0.416851	0.767184	1	0.002217	0.274945	0.498891	0.733925	0.997783	0.43459	0.168514	0.396896	0.053333	0.088889	0.008889	0.002217	0.179601	0.492239	0.780488	1	0.219512	0.414634	0.656319	0.813747	0.922395	0.011086	0.241685	0.452328	0.691796	0.964523	0.545455	0.373333	0.015521	0.288248	0.492239	0.75388	0.984479	0.385809
0.299383	0.37037	0.330247	0.210526	0.213622	0.216718	0.012346	0.283951	0.512346	0.762346	1	0.006173	0.20679	0.478395	0.728395	0.987654	0.003086	0.256173	0.453704	0.746914	0.993827	0.444444	0.216049	0.339506	0.065015	0.058824	0.003096	0.003086	0.169753	0.435185	0.651235	1	0.012346	0.231481	0.447531	0.759259	0.938272	0.021605	0.395062	0.589506	0.82716	0.975309	0.540123	0.334365	0.009259	0.262346	0.490741	0.737654	0.987654	0.361111
0.404632	0.257493	0.337875	0.204638	0.270123	0.169168	0.002725	0.27248	0.543597	0.769755	0.99455	0.010899	0.192098	0.440054	0.69346	0.997275	0.001362	0.257493	0.50545	0.735695	1	0.43188	0.179837	0.388283	0.087312	0.065484	0.002729	0.001362	0.280654	0.549046	0.803815	1	0.00545	0.179837	0.450954	0.867847	0.998638	0.027248	0.26158	0.483651	0.610354	0.948229	0.536785	0.392906	0.006812	0.265668	0.480926	0.711172	0.995913	0.280654
0.373134	0.30597	0.320896	0.234414	0.254364	0.194514	0.00995	0.263682	0.465174	0.723881	0.992537	0.004975	0.159204	0.495025	0.753731	0.997512	0.002488	0.28607	0.529851	0.771144	1	0.405473	0.228856	0.365672	0.089776	0.064838	0.009975	0.002488	0.363184	0.579602	0.751244	1	0.08209	0.455224	0.71393	0.838308	0.925373	0.007463	0.156716	0.281095	0.435323	0.995025	0.5199	0.418953	0.014925	0.241294	0.524876	0.766169	0.995025	0.363184
0.445652	0.206522	0.347826	0.175824	0.318681	0.153846	0.021739	0.206522	0.5	0.76087	1	0.119565	0.326087	0.554348	0.684783	0.891304	0.01087	0.195652	0.413043	0.73913	0.956522	0.423913	0.521739	0.054348	0.10989	0.021978	0.021978	0.01087	0.26087	0.48913	0.717391	1	0.065217	0.336957	0.521739	0.771739	0.978261	0.054348	0.054348	0.086957	0.097826	0.119565	0.369565	0.505495	0.065217	0.26087	0.478261	0.728261	0.967391	0.195652
0.302752	0.426606	0.270642	0.225806	0.179724	0.207373	0.009174	0.169725	0.449541	0.747706	0.958716	0.018349	0.238532	0.444954	0.711009	0.995413	0.004587	0.334862	0.56422	0.793578	1	0.582569	0.256881	0.16055	0.078341	0.032258	0.004608	0.004587	0.233945	0.440367	0.738532	1	0.266055	0.472477	0.573394	0.83945	0.940367	0.12844	0.16055	0.201835	0.637615	0.889908	0.46789	0.35023	0.142202	0.330275	0.573394	0.770642	0.990826	0.444954
0.289931	0.465278	0.244792	0.21913	0.154783	0.24	0.005208	0.239583	0.522569	0.690972	1	0.003472	0.237847	0.475694	0.776042	0.996528	0.001736	0.286458	0.503472	0.722222	0.994792	0.642361	0.090278	0.267361	0.046957	0.085217	0.001739	0.001736	0.220486	0.510417	0.805556	1	0.128472	0.407986	0.479167	0.654514	0.723958	0.026042	0.256944	0.505208	0.670139	0.96875	0.449653	0.389565	0.017361	0.256944	0.529514	0.774306	0.994792	0.472222
0.285955	0.465938	0.248108	0.237374	0.143098	0.207071	0.006728	0.222876	0.472666	0.79058	0.997477	0.001682	0.269975	0.485282	0.658537	0.998318	0.000841	0.262405	0.58032	0.813288	1	0.58873	0.052145	0.359125	0.030303	0.087542	0.005051	0.000841	0.213625	0.42725	0.6291	1	0.005887	0.158957	0.315391	0.476871	0.936081	0.002523	0.400336	0.742641	0.86291	0.981497	0.568545	0.316498	0.002523	0.283431	0.522288	0.728343	0.995795	0.46005
0.417949	0.384615	0.197436	0.291702	0.160821	0.144568	0.002564	0.189744	0.475214	0.715385	1	0.001709	0.246154	0.457265	0.724786	0.998291	0.000855	0.387179	0.582906	0.829915	0.999145	0.680342	0.123077	0.196581	0.051326	0.047904	0.003422	0.000855	0.201709	0.45812	0.717949	1	0.113675	0.406838	0.638462	0.907692	0.977778	0.11453	0.392308	0.511966	0.744444	0.994872	0.365812	0.328486	0.008547	0.37094	0.567521	0.84359	0.999145	0.429915
0.378007	0.257732	0.364261	0.2	0.275862	0.17931	0.006873	0.316151	0.553265	0.742268	0.975945	0.010309	0.158076	0.38488	0.745704	0.993127	0.003436	0.278351	0.501718	0.735395	1	0.381443	0.268041	0.350515	0.072414	0.051724	0.003448	0.003436	0.216495	0.446735	0.752577	1	0.013746	0.182131	0.522337	0.783505	0.955326	0.054983	0.274914	0.491409	0.67354	0.910653	0.573883	0.337931	0.010309	0.199313	0.43299	0.714777	0.989691	0.278351
0.348092	0.367939	0.283969	0.266055	0.201835	0.203364	0.010687	0.276336	0.534351	0.778626	0.998473	0.006107	0.236641	0.50687	0.758779	1	0.001527	0.225954	0.453435	0.690076	0.983206	0.471756	0.120611	0.407634	0.042813	0.076453	0.006116	0.001527	0.233588	0.561832	0.871756	1	0.076336	0.305344	0.468702	0.601527	0.719084	0.00458	0.225954	0.459542	0.734351	0.885496	0.479389	0.318043	0.003053	0.267176	0.468702	0.677863	0.972519	0.39542
0.360489	0.279022	0.360489	0.208163	0.279592	0.2	0.010183	0.252546	0.496945	0.767821	1	0.004073	0.217923	0.486762	0.729124	0.99389	0.002037	0.238289	0.501018	0.743381	0.997963	0.370672	0.124236	0.505092	0.053061	0.085714	0.012245	0.002037	0.160896	0.486762	0.729124	1	0.08554	0.313646	0.503055	0.670061	0.885947	0.008147	0.250509	0.525458	0.771894	0.985743	0.547862	0.453061	0.008147	0.272912	0.501018	0.739308	0.991853	0.285132
0.323308	0.390977	0.285714	0.242938	0.190207	0.220339	0.005639	0.266917	0.537594	0.802632	0.99812	0.003759	0.25188	0.520677	0.755639	0.996241	0.00188	0.214286	0.43985	0.648496	1	0.479323	0.06015	0.460526	0.016949	0.073446	0.00565	0.00188	0.257519	0.612782	0.843985	1	0.058271	0.071429	0.191729	0.389098	0.639098	0.005639	0.31203	0.477444	0.644737	0.994361	0.488722	0.308851	0.007519	0.219925	0.43609	0.62782	0.992481	0.413534
0.402299	0.229885	0.367816	0.244186	0.360465	0.127907	0.034483	0.241379	0.425287	0.666667	0.977011	0.126437	0.264368	0.655172	0.770115	0.931034	0.011494	0.172414	0.494253	0.804598	1	0.45977	0.310345	0.229885	0.116279	0.046512	0	0.011494	0.241379	0.666667	0.804598	1	0.045977	0.275862	0.574713	0.712644	0.896552	0.137931	0.183908	0.390805	0.448276	0.505747	0.344828	0.395349	0.045977	0.16092	0.448276	0.597701	0.965517	0.218391
0.36	0.384	0.256	0.289157	0.172691	0.232932	0.028	0.292	0.56	0.832	1	0.008	0.232	0.504	0.772	0.996	0.004	0.22	0.42	0.644	0.904	0.448	0.312	0.24	0.096386	0.088353	0.008032	0.004	0.216	0.548	0.756	1	0.084	0.308	0.428	0.58	0.78	0.024	0.26	0.616	0.868	0.992	0.408	0.433735	0.016	0.196	0.416	0.608	0.904	0.416
0.333333	0.371795	0.294872	0.206452	0.206452	0.212903	0.019231	0.339744	0.570513	0.782051	0.99359	0.012821	0.282051	0.519231	0.74359	1	0.00641	0.173077	0.391026	0.641026	0.961538	0.326923	0.089744	0.583333	0.03871	0.090323	0	0.00641	0.076923	0.352564	0.705128	1	0.455128	0.467949	0.49359	0.532051	0.570513	0.134615	0.288462	0.615385	0.794872	0.980769	0.442308	0.425806	0.044872	0.275641	0.551282	0.74359	0.980769	0.358974
0.336	0.402	0.262	0.241241	0.201201	0.2002	0.004	0.297	0.508	0.73	0.998	0.002	0.238	0.499	0.765	1	0.001	0.203	0.462	0.734	0.997	0.551	0.122	0.327	0.049049	0.073073	0.015015	0.001	0.266	0.52	0.774	1	0.002	0.149	0.307	0.536	0.921	0.04	0.289	0.57	0.752	0.951	0.413	0.364364	0.003	0.187	0.459	0.761	0.997	0.393
0.291105	0.361186	0.347709	0.194595	0.194595	0.259459	0.024259	0.210243	0.458221	0.684636	0.994609	0.005391	0.239892	0.512129	0.733154	0.997305	0.002695	0.277628	0.509434	0.778976	1	0.45283	0.221024	0.326146	0.083784	0.056757	0.002703	0.002695	0.207547	0.487871	0.754717	1	0.016173	0.28841	0.433962	0.762803	0.894879	0.021563	0.253369	0.568733	0.74124	0.994609	0.528302	0.362162	0.013477	0.296496	0.54717	0.816712	0.989218	0.380054
0.414414	0.283784	0.301802	0.257919	0.20362	0.18552	0.009009	0.265766	0.481982	0.783784	0.990991	0.013514	0.220721	0.536036	0.761261	0.986486	0.004505	0.207207	0.459459	0.671171	1	0.342342	0.063063	0.594595	0.027149	0.099548	0	0.004505	0.292793	0.378378	0.675676	1	0.603604	0.612613	0.630631	0.657658	0.684685	0.022523	0.225225	0.495495	0.774775	0.986486	0.481982	0.479638	0.013514	0.225225	0.486486	0.72973	0.986486	0.297297
0.277533	0.427313	0.295154	0.256637	0.185841	0.261062	0.013216	0.22467	0.524229	0.748899	0.982379	0.008811	0.242291	0.462555	0.700441	1	0.004405	0.259912	0.497797	0.762115	0.995595	0.462555	0.215859	0.321586	0.097345	0.070796	0	0.004405	0.171806	0.409692	0.731278	1	0.092511	0.273128	0.506608	0.76652	0.986784	0.013216	0.370044	0.537445	0.678414	0.867841	0.444934	0.460177	0.022026	0.290749	0.515419	0.753304	0.986784	0.449339
0.367089	0.388186	0.244726	0.317797	0.211864	0.190678	0.008439	0.257384	0.531646	0.797468	1	0.016878	0.303797	0.535865	0.78903	0.974684	0.004219	0.130802	0.337553	0.582278	0.991561	0.71308	0.177215	0.109705	0.076271	0.016949	0.008475	0.004219	0.438819	0.624473	0.801688	1	0.029536	0.126582	0.270042	0.35443	0.945148	0.012658	0.063291	0.092827	0.172996	0.202532	0.168776	0.186441	0.012658	0.084388	0.202532	0.341772	0.7173	0.392405
0.309859	0.380282	0.309859	0.2	0.257143	0.214286	0.028169	0.211268	0.535211	0.859155	0.985915	0.056338	0.267606	0.521127	0.661972	1	0.014085	0.169014	0.43662	0.591549	0.887324	0.549296	0.323944	0.126761	0.142857	0.028571	0	0.014085	0.126761	0.408451	0.661972	1	0.15493	0.211268	0.422535	0.605634	0.774648	0.830986	0.84507	0.873239	0.901408	0.943662	0.366197	0.428571	0.070423	0.225352	0.492958	0.605634	0.943662	0.394366
0.298137	0.39929	0.302573	0.218472	0.175844	0.251332	0.002662	0.24756	0.515528	0.738243	0.997338	0.001775	0.273292	0.516415	0.755989	1	0.000887	0.222715	0.463177	0.753327	0.992014	0.470275	0.171251	0.358474	0.087922	0.07016	0.002664	0.000887	0.193434	0.488909	0.740018	1	0.007986	0.200532	0.416149	0.748891	0.994676	0.04614	0.345164	0.571429	0.781721	0.968944	0.512866	0.40675	0.003549	0.262644	0.512866	0.762201	0.992014	0.404614
0.331169	0.383117	0.285714	0.30719	0.20915	0.24183	0.038961	0.253247	0.506494	0.75974	1	0.012987	0.266234	0.551948	0.772727	0.987013	0.006494	0.168831	0.402597	0.655844	0.993506	0.454545	0.142857	0.402597	0.091503	0.078431	0.013072	0.006494	0.233766	0.584416	0.772727	1	0.012987	0.038961	0.337662	0.727273	0.909091	0.097403	0.285714	0.435065	0.636364	0.987013	0.474026	0.398693	0.006494	0.207792	0.428571	0.714286	0.993506	0.409091
0.294393	0.364486	0.341121	0.215962	0.201878	0.215962	0.023364	0.275701	0.495327	0.761682	1	0.009346	0.233645	0.415888	0.654206	0.953271	0.004673	0.196262	0.565421	0.82243	0.995327	0.537383	0.140187	0.32243	0.065728	0.065728	0	0.004673	0.261682	0.397196	0.64486	1	0.018692	0.046729	0.598131	0.752336	0.934579	0.11215	0.214953	0.565421	0.799065	0.990654	0.514019	0.356808	0.018692	0.317757	0.523364	0.757009	0.990654	0.364486
0.36036	0.301802	0.337838	0.21267	0.271493	0.20362	0.027027	0.220721	0.481982	0.77027	1	0.009009	0.256757	0.423423	0.653153	0.986486	0.004505	0.22973	0.531532	0.747748	0.995495	0.346847	0.247748	0.405405	0.085973	0.085973	0.004525	0.004505	0.189189	0.391892	0.720721	1	0.130631	0.238739	0.5	0.752252	0.963964	0.018018	0.328829	0.518018	0.675676	0.990991	0.441441	0.479638	0.022523	0.297297	0.536036	0.756757	0.986486	0.310811
0.35461	0.248227	0.397163	0.192857	0.271429	0.178571	0.021277	0.205674	0.48227	0.723404	1	0.035461	0.35461	0.510638	0.702128	0.985816	0.007092	0.163121	0.475177	0.758865	0.978723	0.319149	0.148936	0.531915	0.05	0.092857	0.007143	0.007092	0.319149	0.446809	0.751773	1	0.120567	0.390071	0.48227	0.51773	0.787234	0.021277	0.184397	0.567376	0.702128	0.971631	0.489362	0.414286	0.021277	0.191489	0.510638	0.716312	0.971631	0.205674
0.372937	0.323432	0.30363	0.219835	0.213223	0.219835	0.006601	0.29868	0.610561	0.841584	0.988449	0.0033	0.221122	0.442244	0.706271	0.99835	0.00165	0.235974	0.432343	0.660066	1	0.40429	0.128713	0.466997	0.046281	0.105785	0.006612	0.00165	0.280528	0.542904	0.785479	1	0.067657	0.222772	0.382838	0.519802	0.948845	0.00495	0.239274	0.49835	0.737624	0.988449	0.5	0.366942	0.00495	0.19802	0.430693	0.630363	0.9967	0.351485
0.326531	0.397959	0.27551	0.216495	0.103093	0.298969	0.030612	0.214286	0.367347	0.887755	1	0.020408	0.377551	0.55102	0.765306	0.979592	0.010204	0.153061	0.408163	0.612245	0.826531	0.591837	0.214286	0.193878	0.103093	0.061856	0	0.010204	0.27551	0.683673	0.846939	1	0.306122	0.346939	0.510204	0.591837	0.816327	0.122449	0.153061	0.204082	0.428571	0.673469	0.510204	0.247423	0.05102	0.326531	0.469388	0.673469	0.816327	0.326531
0.315855	0.314607	0.369538	0.16625	0.25625	0.2475	0.006242	0.282147	0.526841	0.762797	0.998752	0.004994	0.23221	0.478152	0.736579	1	0.001248	0.230961	0.483146	0.745318	0.997503	0.475655	0.227216	0.297129	0.08875	0.05875	0.00625	0.001248	0.214732	0.453184	0.742821	1	0.03995	0.173533	0.414482	0.805243	0.997503	0.006242	0.343321	0.569288	0.732834	0.991261	0.570537	0.395	0.003745	0.260924	0.469413	0.736579	0.997503	0.333333
0.410072	0.29976	0.290168	0.235577	0.233173	0.173077	0.007194	0.242206	0.534772	0.726619	1	0.004796	0.297362	0.479616	0.800959	0.995204	0.002398	0.203837	0.434053	0.738609	0.997602	0.441247	0.206235	0.352518	0.0625	0.067308	0.009615	0.002398	0.266187	0.532374	0.688249	1	0.023981	0.170264	0.47482	0.714628	0.844125	0.071942	0.282974	0.407674	0.841727	0.992806	0.467626	0.399038	0.01199	0.213429	0.429257	0.760192	0.990408	0.29976
0.405303	0.367424	0.227273	0.288973	0.18251	0.171103	0.011364	0.291667	0.503788	0.772727	0.996212	0.007576	0.234848	0.560606	0.806818	1	0.003788	0.17803	0.382576	0.575758	0.901515	0.640152	0.121212	0.238636	0.038023	0.053232	0.007605	0.003788	0.227273	0.617424	0.837121	1	0.079545	0.375	0.431818	0.541667	0.666667	0.007576	0.284091	0.344697	0.575758	0.734848	0.439394	0.34981	0.015152	0.185606	0.435606	0.651515	0.992424	0.397727
0.243816	0.498233	0.257951	0.216312	0.131206	0.262411	0.007067	0.212014	0.342756	0.650177	0.975265	0.010601	0.289753	0.54417	0.756184	1	0.003534	0.226148	0.508834	0.763251	0.992933	0.798587	0.120141	0.081272	0.056738	0.021277	0	0.003534	0.332155	0.55477	0.759717	1	0.120141	0.219081	0.279152	0.611307	0.992933	0.162544	0.176678	0.293286	0.314488	0.904594	0.572438	0.297872	0.021201	0.318021	0.55477	0.713781	0.992933	0.44523
0.310087	0.315068	0.374844	0.190773	0.269327	0.24813	0.002491	0.234122	0.486924	0.740971	1	0.004981	0.265255	0.499377	0.752179	0.996264	0.001245	0.250311	0.496887	0.742217	0.998755	0.466999	0.242839	0.290162	0.100998	0.05611	0.003741	0.001245	0.231631	0.460772	0.737235	1	0.038605	0.200498	0.420922	0.803238	0.998755	0.006227	0.32005	0.542964	0.703611	0.992528	0.570361	0.408978	0.003736	0.255293	0.473225	0.726027	0.998755	0.303861
0.358904	0.367123	0.273973	0.236264	0.21978	0.233516	0.008219	0.260274	0.536986	0.726027	0.967123	0.005479	0.273973	0.509589	0.772603	1	0.00274	0.208219	0.421918	0.693151	0.983562	0.517808	0.279452	0.20274	0.104396	0.043956	0.010989	0.00274	0.309589	0.512329	0.715068	1	0.035616	0.167123	0.29863	0.865753	0.986301	0.008219	0.432877	0.632877	0.772603	0.827397	0.435616	0.340659	0.010959	0.208219	0.356164	0.810959	0.989041	0.394521
0.393665	0.321267	0.285068	0.222727	0.245455	0.195455	0.022624	0.244344	0.556561	0.846154	1	0.00905	0.180995	0.506787	0.733032	0.963801	0.004525	0.230769	0.41629	0.647059	0.927602	0.443439	0.334842	0.221719	0.113636	0.068182	0.013636	0.004525	0.262443	0.61991	0.81448	1	0.036199	0.312217	0.447964	0.588235	0.923077	0.013575	0.095023	0.244344	0.850679	0.963801	0.384615	0.4	0.0181	0.235294	0.41629	0.624434	0.923077	0.366516
0.347826	0.365217	0.286957	0.307018	0.201754	0.210526	0.043478	0.217391	0.495652	0.747826	0.982609	0.017391	0.191304	0.469565	0.756522	1	0.008696	0.278261	0.504348	0.66087	0.991304	0.504348	0.234783	0.26087	0.096491	0.061404	0.008772	0.008696	0.121739	0.434783	0.773913	1	0.391304	0.6	0.66087	0.843478	0.947826	0.173913	0.226087	0.347826	0.521739	0.965217	0.330435	0.368421	0.130435	0.278261	0.530435	0.66087	0.965217	0.373913
0.39599	0.397243	0.206767	0.331242	0.159348	0.16813	0.005013	0.256892	0.52381	0.799499	1	0.002506	0.276942	0.467419	0.734336	0.996241	0.001253	0.179198	0.484962	0.685464	0.997494	0.714286	0.070175	0.215539	0.035132	0.067754	0	0.001253	0.239348	0.457393	0.695489	1	0.070175	0.358396	0.754386	0.883459	0.938596	0.005013	0.186717	0.552632	0.834586	0.997494	0.327068	0.351317	0.003759	0.229323	0.541353	0.775689	0.997494	0.442356
0.405797	0.289855	0.304348	0.264706	0.25	0.147059	0.043478	0.275362	0.449275	0.652174	1	0.072464	0.144928	0.434783	0.681159	0.985507	0.014493	0.217391	0.608696	0.782609	0.971014	0.565217	0.15942	0.275362	0.088235	0.058824	0	0.014493	0.130435	0.362319	0.565217	1	0.173913	0.188406	0.231884	0.478261	0.956522	0.608696	0.652174	0.73913	0.811594	0.884058	0.333333	0.382353	0.144928	0.231884	0.623188	0.753623	0.927536	0.275362
0.359712	0.359712	0.280576	0.217391	0.173913	0.224638	0.021583	0.338129	0.546763	0.741007	0.971223	0.014388	0.194245	0.410072	0.784173	1	0.007194	0.23741	0.467626	0.697842	0.992806	0.47482	0.129496	0.395683	0.057971	0.072464	0	0.007194	0.208633	0.553957	0.863309	1	0.230216	0.251799	0.345324	0.618705	0.913669	0.057554	0.165468	0.496403	0.748201	0.848921	0.417266	0.362319	0.028777	0.258993	0.467626	0.640288	0.964029	0.338129
0.416129	0.329032	0.254839	0.265372	0.229773	0.18123	0.016129	0.203226	0.419355	0.712903	1	0.006452	0.287097	0.548387	0.73871	0.996774	0.003226	0.283871	0.519355	0.758065	0.993548	0.63871	0.083871	0.277419	0.058252	0.071197	0	0.003226	0.316129	0.583871	0.8	1	0.012903	0.083871	0.53871	0.6	0.993548	0.096774	0.193548	0.267742	0.564516	0.906452	0.383871	0.407767	0.009677	0.306452	0.541935	0.777419	0.993548	0.341935
0.293388	0.429752	0.27686	0.294606	0.157676	0.244813	0.012397	0.243802	0.495868	0.752066	1	0.008264	0.231405	0.479339	0.764463	0.995868	0.004132	0.239669	0.504132	0.690083	0.979339	0.376033	0.103306	0.520661	0.033195	0.074689	0	0.004132	0.165289	0.458678	0.743802	1	0.429752	0.764463	0.81405	0.838843	0.880165	0.041322	0.247934	0.495868	0.632231	0.975207	0.483471	0.340249	0.049587	0.243802	0.442149	0.640496	0.966942	0.42562
0.357909	0.348525	0.293566	0.230872	0.201342	0.2	0.004021	0.215818	0.502681	0.730563	0.993298	0.002681	0.257373	0.517426	0.816354	1	0.00134	0.246649	0.47319	0.717158	0.995979	0.549598	0.162198	0.288204	0.071141	0.079195	0.001342	0.00134	0.270777	0.525469	0.758713	1	0.096515	0.321716	0.577748	0.766756	0.997319	0.012064	0.140751	0.394102	0.678284	0.957105	0.475871	0.357047	0.012064	0.254692	0.474531	0.753351	0.997319	0.379357
0.408654	0.278846	0.3125	0.21256	0.2657	0.164251	0.014423	0.259615	0.5	0.778846	1	0.009615	0.173077	0.418269	0.639423	0.971154	0.004808	0.307692	0.514423	0.75	0.990385	0.475962	0.149038	0.375	0.062802	0.072464	0.033816	0.004808	0.149038	0.514423	0.711538	1	0.230769	0.293269	0.596154	0.697115	0.961538	0.038462	0.346154	0.456731	0.745192	0.985577	0.461538	0.396135	0.019231	0.360577	0.514423	0.745192	0.975962	0.254808
0.3509	0.312339	0.336761	0.20592	0.243243	0.221364	0.006427	0.258355	0.51671	0.760925	1	0.005141	0.235219	0.48329	0.736504	0.997429	0.001285	0.22108	0.488432	0.733933	0.998715	0.471722	0.22365	0.304627	0.095238	0.059202	0.005148	0.001285	0.24036	0.456298	0.74036	1	0.041131	0.152956	0.494859	0.818766	0.998715	0.006427	0.327763	0.537275	0.706941	0.992288	0.569409	0.42471	0.003856	0.236504	0.474293	0.744216	0.998715	0.347044
0.394444	0.298148	0.307407	0.250464	0.261596	0.165121	0.003704	0.233333	0.501852	0.737037	0.998148	0.009259	0.322222	0.572222	0.848148	0.987037	0.001852	0.212963	0.438889	0.644444	1	0.405556	0.207407	0.387037	0.064935	0.068646	0.001855	0.001852	0.314815	0.590741	0.881481	1	0.094444	0.27963	0.374074	0.52963	0.944444	0.012963	0.216667	0.507407	0.709259	0.848148	0.446296	0.378479	0.009259	0.27037	0.464815	0.644444	0.994444	0.346296
0.331126	0.377483	0.291391	0.229236	0.229236	0.196013	0.013245	0.235099	0.47351	0.738411	0.996689	0.006623	0.261589	0.536424	0.811258	0.986755	0.003311	0.241722	0.460265	0.675497	1	0.453642	0.162252	0.384106	0.046512	0.07309	0	0.003311	0.258278	0.509934	0.837748	1	0.122517	0.274834	0.354305	0.562914	0.649007	0.033113	0.241722	0.486755	0.761589	0.903974	0.559603	0.41196	0.019868	0.231788	0.470199	0.705298	0.986755	0.427152
0.376344	0.301075	0.322581	0.206522	0.271739	0.23913	0.032258	0.236559	0.462366	0.688172	0.903226	0.021505	0.247312	0.537634	0.892473	1	0.010753	0.182796	0.44086	0.666667	0.978495	0.494624	0.301075	0.204301	0.097826	0.032609	0.01087	0.010753	0.236559	0.645161	0.795699	1	0.11828	0.290323	0.569892	0.688172	0.88172	0.150538	0.182796	0.376344	0.430108	0.483871	0.365591	0.434783	0.043011	0.172043	0.44086	0.591398	0.978495	0.290323
0.305668	0.502024	0.192308	0.273834	0.133874	0.188641	0.006073	0.261134	0.530364	0.730769	1	0.004049	0.248988	0.481781	0.740891	0.993927	0.002024	0.226721	0.51417	0.765182	0.997976	0.732794	0.058704	0.208502	0.032454	0.064909	0.008114	0.002024	0.202429	0.502024	0.757085	1	0.115385	0.483806	0.665992	0.807692	0.995951	0.109312	0.259109	0.319838	0.591093	0.965587	0.508097	0.267748	0.016194	0.291498	0.508097	0.805668	0.997976	0.45749
0.43609	0.323308	0.240602	0.287879	0.189394	0.166667	0.015038	0.263158	0.548872	0.774436	1	0.037594	0.255639	0.488722	0.684211	0.992481	0.007519	0.150376	0.413534	0.691729	0.954887	0.421053	0.195489	0.383459	0.106061	0.060606	0.015152	0.007519	0.165414	0.383459	0.819549	1	0.075188	0.315789	0.443609	0.503759	0.654135	0.082707	0.210526	0.691729	0.789474	0.954887	0.353383	0.409091	0.067669	0.142857	0.323308	0.586466	0.954887	0.323308
0.348548	0.240664	0.410788	0.195833	0.316667	0.195833	0.008299	0.282158	0.514523	0.73029	1	0.020747	0.190871	0.585062	0.792531	0.983402	0.004149	0.224066	0.46473	0.717842	0.995851	0.352697	0.26971	0.377593	0.079167	0.054167	0.004167	0.004149	0.211618	0.456432	0.850622	1	0.033195	0.323651	0.39834	0.755187	0.975104	0.087137	0.19917	0.510373	0.680498	0.86722	0.53527	0.458333	0.020747	0.244813	0.551867	0.771784	0.975104	0.207469
0.354839	0.270968	0.374194	0.168831	0.25974	0.24026	0.025806	0.193548	0.483871	0.793548	0.987097	0.012903	0.206452	0.445161	0.735484	1	0.006452	0.264516	0.516129	0.709677	0.993548	0.296774	0	0.703226	0	0.103896	0	0.006452	0.187097	0.348387	0.729032	1	0	0	0	0	0	0.051613	0.251613	0.516129	0.76129	0.980645	0.522581	0.363636	0.058065	0.270968	0.548387	0.741935	0.974194	0.283871
0.421053	0.294737	0.284211	0.255319	0.234043	0.170213	0.021053	0.315789	0.642105	0.821053	0.989474	0.052632	0.273684	0.452632	0.621053	0.957895	0.010526	0.157895	0.368421	0.578947	1	0.6	0.263158	0.136842	0.085106	0.06383	0	0.010526	0.294737	0.505263	0.8	1	0.094737	0.147368	0.252632	0.368421	0.557895	0.610526	0.631579	0.663158	0.694737	0.968421	0.336842	0.340426	0.042105	0.178947	0.389474	0.484211	0.968421	0.336842
0.323432	0.313531	0.363036	0.198675	0.264901	0.235099	0.009901	0.287129	0.570957	0.805281	0.993399	0.006601	0.240924	0.485149	0.752475	1	0.0033	0.191419	0.452145	0.653465	0.976898	0.478548	0.356436	0.165017	0.112583	0.05298	0.006623	0.0033	0.346535	0.646865	0.854785	1	0.013201	0.20462	0.379538	0.554455	0.980198	0.115512	0.155116	0.514851	0.729373	0.778878	0.50165	0.377483	0.013201	0.247525	0.448845	0.627063	0.983498	0.369637
0.42953	0.278523	0.291946	0.23569	0.272727	0.16835	0.02349	0.308725	0.533557	0.704698	1	0.006711	0.167785	0.385906	0.788591	0.996644	0.003356	0.218121	0.489933	0.771812	0.993289	0.45302	0.137584	0.409396	0.070707	0.077441	0.003367	0.003356	0.177852	0.446309	0.731544	1	0.010067	0.211409	0.768456	0.88255	0.993289	0.053691	0.302013	0.5	0.61745	0.942953	0.426174	0.383838	0.013423	0.211409	0.40604	0.778523	0.993289	0.281879
0.34375	0.375	0.28125	0.2	0.263158	0.136842	0.03125	0.260417	0.385417	0.677083	0.989583	0.052083	0.1875	0.5625	0.75	0.96875	0.010417	0.25	0.458333	0.645833	1	0.46875	0.166667	0.364583	0.105263	0.084211	0	0.010417	0.177083	0.458333	0.666667	1	0.083333	0.40625	0.541667	0.604167	0.697917	0.145833	0.270833	0.364583	0.864583	0.96875	0.458333	0.484211	0.041667	0.25	0.552083	0.729167	0.916667	0.395833
0.334577	0.349502	0.31592	0.225405	0.224159	0.227895	0.007463	0.253731	0.493781	0.727612	1	0.004975	0.254975	0.504975	0.748756	0.987562	0.001244	0.235075	0.492537	0.762438	0.998756	0.466418	0.24005	0.293532	0.103362	0.053549	0.003736	0.001244	0.210199	0.46393	0.75	1	0.038557	0.207711	0.424129	0.794776	0.998756	0.006219	0.323383	0.54602	0.705224	0.992537	0.56592	0.400996	0.003731	0.263682	0.477612	0.737562	0.998756	0.369403
0.347911	0.330418	0.321672	0.218872	0.216926	0.236381	0.001944	0.237123	0.458698	0.718173	0.996113	0.007775	0.242954	0.50826	0.750243	0.999028	0.000972	0.262391	0.52964	0.773567	1	0.471331	0.200194	0.328474	0.070039	0.064202	0.007782	0.000972	0.272109	0.456754	0.746356	1	0.004859	0.283771	0.489796	0.742468	0.979592	0.015549	0.195335	0.601555	0.783285	0.897959	0.535471	0.340467	0.002915	0.250729	0.52964	0.762877	0.998056	0.360544
0.334928	0.294258	0.370813	0.194245	0.280576	0.218225	0.004785	0.289474	0.509569	0.748804	0.997608	0.011962	0.200957	0.507177	0.729665	0.995215	0.002392	0.251196	0.4689	0.772727	1	0.361244	0.138756	0.5	0.076739	0.100719	0.004796	0.002392	0.212919	0.54067	0.799043	1	0.047847	0.174641	0.533493	0.92823	0.995215	0.009569	0.258373	0.476077	0.712919	0.942584	0.586124	0.364508	0.009569	0.244019	0.471292	0.674641	0.995215	0.322967
0.39586	0.310479	0.293661	0.217617	0.226684	0.204663	0.003881	0.204398	0.482536	0.791721	1	0.002587	0.279431	0.542044	0.741268	0.988357	0.001294	0.26132	0.485123	0.705045	0.989651	0.495472	0.128072	0.376455	0.054404	0.07772	0.005181	0.001294	0.156533	0.398448	0.699871	1	0.023286	0.359638	0.514877	0.637775	0.97542	0.029754	0.344114	0.595084	0.83053	0.996119	0.45925	0.352332	0.007762	0.315653	0.503234	0.712807	0.989651	0.359638
0.419355	0.348387	0.232258	0.28479	0.177994	0.161812	0.006452	0.232258	0.587097	0.825806	1	0.019355	0.329032	0.493548	0.735484	0.993548	0.003226	0.16129	0.387097	0.606452	0.848387	0.567742	0.264516	0.167742	0.084142	0.038835	0	0.003226	0.280645	0.483871	0.696774	1	0.009677	0.106452	0.306452	0.558065	0.725806	0.206452	0.764516	0.816129	0.858065	0.977419	0.416129	0.28479	0.009677	0.164516	0.393548	0.577419	0.935484	0.341935
0.300781	0.355469	0.34375	0.203922	0.211765	0.254902	0.007812	0.226562	0.507812	0.773438	0.988281	0.011719	0.273438	0.519531	0.710938	1	0.003906	0.234375	0.453125	0.71875	0.992188	0.398438	0.1875	0.414062	0.054902	0.078431	0	0.003906	0.222656	0.519531	0.714844	1	0.113281	0.300781	0.378906	0.597656	0.695312	0.011719	0.242188	0.496094	0.8125	0.992188	0.550781	0.4	0.019531	0.222656	0.464844	0.664062	0.992188	0.390625
0.387931	0.344828	0.267241	0.26087	0.156522	0.147826	0.017241	0.189655	0.387931	0.715517	0.974138	0.025862	0.284483	0.612069	0.853448	1	0.008621	0.232759	0.413793	0.560345	0.844828	0.715517	0.077586	0.206897	0.052174	0.052174	0	0.008621	0.284483	0.603448	0.784483	1	0.362069	0.517241	0.534483	0.948276	0.974138	0.155172	0.198276	0.25	0.431034	0.482759	0.232759	0.173913	0.094828	0.318966	0.422414	0.5	0.767241	0.37931
0.23374	0.534553	0.231707	0.224033	0.118126	0.201629	0.004065	0.174797	0.357724	0.819106	0.995935	0.006098	0.315041	0.565041	0.745935	1	0.002033	0.215447	0.424797	0.723577	0.997967	0.554878	0.160569	0.284553	0.065173	0.044807	0.008147	0.002033	0.256098	0.50813	0.729675	1	0.067073	0.172764	0.365854	0.585366	0.934959	0.083333	0.207317	0.522358	0.863821	0.987805	0.520325	0.325866	0.01626	0.310976	0.583333	0.745935	0.969512	0.52439
0.337237	0.466042	0.196721	0.309859	0.126761	0.171362	0.018735	0.274005	0.559719	0.796253	0.997658	0.004684	0.220141	0.428571	0.70726	1	0.002342	0.278689	0.526932	0.765808	0.98829	0.702576	0.105386	0.192037	0.039906	0.058685	0.007042	0.002342	0.210773	0.42623	0.70726	1	0.023419	0.283372	0.613583	0.737705	0.786885	0.098361	0.491803	0.576112	0.814988	0.971897	0.334895	0.29108	0.023419	0.241218	0.487119	0.711944	0.98829	0.477752
0.263543	0.508053	0.228404	0.228739	0.139296	0.193548	0.002928	0.351391	0.549048	0.774524	1	0.005857	0.219619	0.491947	0.727672	0.998536	0.001464	0.20937	0.415813	0.749634	0.994143	0.626647	0.152269	0.221083	0.060117	0.054252	0.001466	0.001464	0.254758	0.491947	0.79063	1	0.143485	0.27672	0.420205	0.740849	0.85798	0.019034	0.228404	0.562225	0.711567	0.992679	0.484627	0.343109	0.007321	0.238653	0.474378	0.761347	0.997072	0.528551
0.393443	0.360656	0.245902	0.366667	0.166667	0.15	0.04918	0.213115	0.459016	0.737705	0.967213	0.032787	0.163934	0.327869	0.606557	1	0.016393	0.42623	0.672131	0.770492	0.934426	0.639344	0.016393	0.344262	0.033333	0.1	0	0.016393	0.147541	0.360656	0.540984	1	0.442623	0.442623	0.442623	0.442623	0.442623	0.278689	0.590164	0.704918	0.786885	0.885246	0.311475	0.366667	0.344262	0.47541	0.655738	0.770492	0.934426	0.442623
0.316113	0.364084	0.319803	0.237685	0.23399	0.225369	0.00246	0.259533	0.531365	0.773678	1	0.00492	0.238622	0.463715	0.712177	0.99754	0.00123	0.255843	0.512915	0.769988	0.99877	0.464945	0.239852	0.295203	0.096059	0.059113	0.002463	0.00123	0.230012	0.478475	0.738007	1	0.04182	0.198032	0.415744	0.801968	0.99877	0.00615	0.319803	0.570726	0.706027	0.99262	0.564576	0.399015	0.00369	0.258303	0.468635	0.742927	0.99877	0.383764
0.363636	0.46281	0.173554	0.4	0.141667	0.1	0.016529	0.280992	0.570248	0.760331	1	0.033058	0.330579	0.578512	0.818182	0.991736	0.008264	0.132231	0.256198	0.347107	0.702479	0.61157	0.173554	0.214876	0.083333	0.066667	0	0.008264	0.231405	0.553719	0.842975	1	0.090909	0.123967	0.198347	0.280992	0.413223	0.454545	0.495868	0.694215	0.743802	0.809917	0.247934	0.266667	0.041322	0.181818	0.305785	0.371901	0.77686	0.487603
0.378902	0.444564	0.176534	0.307112	0.125	0.158405	0.002153	0.184069	0.474704	0.765339	1	0.003229	0.299247	0.515608	0.710441	0.998924	0.001076	0.272336	0.431647	0.782562	0.995694	0.65662	0.123789	0.219591	0.054957	0.048491	0.001078	0.001076	0.214209	0.487621	0.687836	1	0.139935	0.220667	0.359526	0.614639	0.960172	0.121636	0.386437	0.74704	0.847147	0.997847	0.398278	0.321121	0.003229	0.304629	0.477933	0.719053	0.998924	0.439182
0.319635	0.424658	0.255708	0.302752	0.169725	0.192661	0.013699	0.260274	0.515982	0.789954	1	0.009132	0.200913	0.520548	0.73516	0.995434	0.004566	0.296804	0.479452	0.666667	0.894977	0.406393	0.420091	0.173516	0.119266	0.055046	0	0.004566	0.273973	0.611872	0.789954	1	0.027397	0.30137	0.47032	0.598174	0.821918	0.086758	0.123288	0.26484	0.872146	0.986301	0.406393	0.412844	0.031963	0.251142	0.43379	0.648402	0.858447	0.43379
0.344828	0.387931	0.267241	0.252174	0.208696	0.2	0.025862	0.301724	0.474138	0.784483	1	0.017241	0.189655	0.448276	0.715517	0.956897	0.008621	0.232759	0.525862	0.706897	0.991379	0.310345	0.232759	0.456897	0.069565	0.086957	0.017391	0.008621	0.215517	0.577586	0.715517	1	0.362069	0.508621	0.568966	0.706897	0.982759	0.051724	0.155172	0.301724	0.741379	0.905172	0.405172	0.504348	0.043103	0.267241	0.517241	0.715517	0.991379	0.413793
0.346939	0.318367	0.334694	0.221311	0.258197	0.204918	0.008163	0.212245	0.453061	0.75102	1	0.028571	0.24898	0.502041	0.734694	0.991837	0.004082	0.261224	0.510204	0.714286	0.983673	0.4	0.183673	0.416327	0.069672	0.094262	0.004098	0.004082	0.155102	0.383673	0.689796	1	0.044898	0.232653	0.497959	0.628571	0.722449	0.061224	0.277551	0.571429	0.828571	0.983673	0.57551	0.434426	0.028571	0.240816	0.465306	0.677551	0.983673	0.257143
0.282927	0.409756	0.307317	0.22549	0.196078	0.269608	0.009756	0.243902	0.404878	0.643902	0.956098	0.014634	0.22439	0.570732	0.804878	1	0.004878	0.239024	0.473171	0.702439	0.917073	0.409756	0.443902	0.146341	0.127451	0.039216	0	0.004878	0.326829	0.57561	0.809756	1	0.019512	0.297561	0.468293	0.643902	0.887805	0.078049	0.107317	0.24878	0.678049	0.970732	0.429268	0.441176	0.02439	0.253659	0.463415	0.702439	0.985366	0.419512
0.364706	0.308235	0.327059	0.209906	0.259434	0.186321	0.004706	0.244706	0.505882	0.734118	1	0.011765	0.211765	0.416471	0.769412	0.995294	0.002353	0.263529	0.508235	0.741176	0.997647	0.425882	0.167059	0.407059	0.061321	0.080189	0.004717	0.002353	0.141176	0.416471	0.738824	1	0.183529	0.381176	0.6	0.811765	0.931765	0.023529	0.282353	0.529412	0.724706	0.990588	0.569412	0.358491	0.009412	0.258824	0.470588	0.748235	0.992941	0.345882
0.321839	0.385878	0.292282	0.230263	0.185855	0.246711	0.00821	0.211823	0.425287	0.727422	1	0.004926	0.26601	0.52381	0.760263	0.990148	0.001642	0.28243	0.520525	0.73399	0.996716	0.612479	0.17734	0.210181	0.082237	0.069079	0	0.001642	0.275862	0.484401	0.773399	1	0.004926	0.254516	0.558292	0.740558	0.996716	0.027915	0.18555	0.464696	0.720854	0.850575	0.45156	0.365132	0.003284	0.298851	0.558292	0.816092	0.996716	0.367816
0.287671	0.369863	0.342466	0.206897	0.234483	0.255172	0.047945	0.294521	0.575342	0.780822	0.993151	0.013699	0.212329	0.479452	0.657534	1	0.006849	0.184932	0.493151	0.767123	0.986301	0.390411	0.219178	0.390411	0.068966	0.096552	0	0.006849	0.164384	0.458904	0.657534	1	0.020548	0.068493	0.431507	0.506849	0.986301	0.171233	0.308219	0.575342	0.835616	0.945205	0.479452	0.496552	0.027397	0.232877	0.479452	0.726027	0.979452	0.410959
0.358416	0.346535	0.29505	0.248016	0.202381	0.19246	0.005941	0.281188	0.562376	0.772277	1	0.00396	0.160396	0.374257	0.710891	0.994059	0.00198	0.338614	0.540594	0.746535	0.99802	0.485149	0.156436	0.358416	0.053571	0.069444	0.005952	0.00198	0.120792	0.334653	0.687129	1	0.172277	0.445545	0.615842	0.79802	0.914851	0.20198	0.368317	0.544554	0.776238	0.99604	0.522772	0.353175	0.013861	0.322772	0.512871	0.752475	0.99604	0.39604
0.381089	0.372493	0.246418	0.247126	0.16092	0.201149	0.008596	0.234957	0.444126	0.716332	0.991404	0.005731	0.157593	0.446991	0.724928	0.997135	0.002865	0.378223	0.567335	0.782235	1	0.481375	0.22063	0.297994	0.063218	0.057471	0.005747	0.002865	0.140401	0.432665	0.719198	1	0.409742	0.60745	0.802292	0.876791	0.994269	0.071633	0.206304	0.312321	0.495702	0.762178	0.424069	0.287356	0.04298	0.446991	0.627507	0.805158	0.994269	0.366762
0.367925	0.377358	0.254717	0.238095	0.180952	0.133333	0.04717	0.207547	0.537736	0.830189	0.933962	0.037736	0.264151	0.490566	0.707547	1	0.009434	0.113208	0.433962	0.632075	0.801887	0.509434	0.169811	0.320755	0.057143	0.057143	0	0.009434	0.330189	0.509434	0.849057	1	0.235849	0.264151	0.443396	0.537736	0.584906	0.04717	0.113208	0.613208	0.688679	0.896226	0.339623	0.304762	0.075472	0.245283	0.443396	0.603774	0.801887	0.396226
0.466019	0.262136	0.271845	0.284314	0.22549	0.137255	0.029126	0.31068	0.582524	0.786408	0.990291	0.019417	0.184466	0.339806	0.572816	1	0.009709	0.174757	0.495146	0.76699	0.941748	0.61165	0.097087	0.291262	0.098039	0.098039	0	0.009709	0.145631	0.359223	0.650485	1	0.15534	0.165049	0.582524	0.601942	0.76699	0.184466	0.466019	0.669903	0.883495	0.970874	0.378641	0.411765	0.087379	0.203883	0.504854	0.747573	0.970874	0.300971
0.370031	0.357798	0.272171	0.245399	0.190184	0.220859	0.006116	0.198777	0.489297	0.727829	0.993884	0.009174	0.278287	0.510703	0.770642	0.990826	0.003058	0.256881	0.461774	0.70948	1	0.452599	0.12844	0.41896	0.058282	0.076687	0.009202	0.003058	0.321101	0.556575	0.764526	1	0.012232	0.391437	0.501529	0.691131	0.993884	0.06422	0.207951	0.35474	0.785933	0.95107	0.492355	0.398773	0.015291	0.296636	0.501529	0.721713	0.987768	0.345566
0.39528	0.312684	0.292035	0.239645	0.224852	0.204142	0.014749	0.315634	0.569322	0.787611	1	0.0059	0.176991	0.427729	0.687316	0.99115	0.00295	0.224189	0.471976	0.728614	0.985251	0.622419	0.144543	0.233038	0.053254	0.059172	0	0.00295	0.188791	0.380531	0.758112	1	0.085546	0.156342	0.412979	0.539823	0.784661	0.303835	0.560472	0.710914	0.849558	0.982301	0.427729	0.420118	0.011799	0.238938	0.480826	0.666667	0.985251	0.365782
0.337449	0.358025	0.304527	0.285124	0.210744	0.202479	0.012346	0.201646	0.530864	0.773663	0.987654	0.00823	0.230453	0.481481	0.707819	0.995885	0.004115	0.288066	0.465021	0.736626	1	0.534979	0.209877	0.255144	0.057851	0.066116	0.016529	0.004115	0.152263	0.320988	0.621399	1	0.08642	0.36214	0.502058	0.740741	0.995885	0.242798	0.427984	0.658436	0.835391	0.950617	0.469136	0.31405	0.061728	0.308642	0.534979	0.728395	0.99177	0.374486
0.385993	0.379479	0.234528	0.256117	0.150082	0.190865	0.008143	0.153094	0.436482	0.71987	1	0.003257	0.245928	0.454397	0.747557	0.996743	0.001629	0.387622	0.581433	0.781759	0.998371	0.478827	0.149837	0.371336	0.052202	0.081566	0.003263	0.001629	0.179153	0.399023	0.729642	1	0.271987	0.511401	0.666124	0.781759	0.996743	0.017915	0.307818	0.493485	0.752443	0.959283	0.467427	0.309951	0.013029	0.384365	0.568404	0.763844	0.998371	0.420195
0.40717	0.348271	0.244558	0.269231	0.167949	0.174359	0.002561	0.201024	0.448143	0.727273	1	0.010243	0.266325	0.550576	0.763124	0.997439	0.00128	0.307298	0.548015	0.741357	0.99872	0.545455	0.12548	0.329065	0.042308	0.085897	0.003846	0.00128	0.158771	0.446863	0.792574	1	0.215109	0.444302	0.596671	0.704225	0.841229	0.003841	0.321383	0.498079	0.71959	0.994878	0.4379	0.305128	0.003841	0.317542	0.504481	0.705506	0.994878	0.389245
0.408935	0.305842	0.285223	0.208262	0.277108	0.163511	0.006873	0.218213	0.498282	0.721649	0.994845	0.003436	0.249141	0.544674	0.852234	0.998282	0.001718	0.276632	0.465636	0.689003	1	0.503436	0.121993	0.37457	0.043029	0.08778	0.008606	0.001718	0.281787	0.546392	0.852234	1	0.072165	0.295533	0.333333	0.699313	0.969072	0.013746	0.176976	0.455326	0.627148	0.967354	0.439863	0.371773	0.022337	0.30756	0.494845	0.702749	0.984536	0.353952
0.385827	0.254593	0.35958	0.184211	0.305263	0.194737	0.005249	0.199475	0.493438	0.748031	0.994751	0.018373	0.312336	0.496063	0.771654	0.965879	0.002625	0.233596	0.480315	0.716535	1	0.367454	0.24147	0.391076	0.073684	0.073684	0	0.002625	0.330709	0.553806	0.83727	1	0.007874	0.146982	0.39895	0.511811	0.860892	0.065617	0.265092	0.598425	0.748031	0.989501	0.606299	0.421053	0.010499	0.270341	0.519685	0.740157	0.992126	0.275591
0.432161	0.316583	0.251256	0.257576	0.212121	0.19697	0.01005	0.261307	0.542714	0.809045	1	0.055276	0.246231	0.462312	0.723618	0.98995	0.005025	0.18593	0.447236	0.633166	0.964824	0.386935	0.236181	0.376884	0.10101	0.070707	0.010101	0.005025	0.170854	0.557789	0.834171	1	0.01005	0.180905	0.457286	0.658291	0.733668	0.045226	0.266332	0.361809	0.773869	0.959799	0.351759	0.414141	0.015075	0.19598	0.467337	0.658291	0.964824	0.321608
0.310592	0.362657	0.32675	0.239209	0.197842	0.253597	0.005386	0.247756	0.477558	0.696589	1	0.003591	0.238779	0.506284	0.775583	0.996409	0.001795	0.245961	0.51526	0.736086	0.992819	0.576302	0.143627	0.280072	0.052158	0.084532	0.008993	0.001795	0.235189	0.536804	0.815081	1	0.059246	0.346499	0.527828	0.64991	0.969479	0.005386	0.251346	0.40395	0.671454	0.958707	0.48474	0.442446	0.014363	0.314183	0.524237	0.743268	0.992819	0.348294
0.406545	0.306156	0.287299	0.241398	0.241398	0.169811	0.003328	0.239046	0.507488	0.731559	0.999445	0.001109	0.289517	0.50416	0.745979	1	0.000555	0.207432	0.473655	0.770383	0.997227	0.569606	0.160843	0.269551	0.064373	0.056604	0.00444	0.000555	0.287854	0.523572	0.678314	1	0.010538	0.260677	0.445369	0.77482	0.995563	0.006656	0.143649	0.418747	0.833611	0.991681	0.468109	0.358491	0.002773	0.281198	0.494176	0.806988	0.996672	0.324459
0.339233	0.333333	0.327434	0.223043	0.22452	0.211226	0.00295	0.30826	0.529499	0.762537	1	0.007375	0.231563	0.466077	0.712389	0.99705	0.001475	0.221239	0.483776	0.752212	0.998525	0.353982	0.181416	0.464602	0.063516	0.081241	0.004431	0.001475	0.249263	0.579646	0.809735	1	0.029499	0.240413	0.668142	0.867257	0.963127	0.007375	0.265487	0.446903	0.646018	0.9941	0.528024	0.398818	0.00885	0.212389	0.455752	0.69764	0.995575	0.340708
0.476891	0.348739	0.17437	0.267368	0.168421	0.107368	0.004202	0.336134	0.537815	0.754202	1	0.006303	0.193277	0.44958	0.779412	0.997899	0.002101	0.210084	0.359244	0.594538	0.966387	0.563025	0.077731	0.359244	0.031579	0.098947	0.002105	0.002101	0.212185	0.579832	0.785714	1	0.142857	0.205882	0.243697	0.313025	0.968487	0.023109	0.378151	0.497899	0.75	0.995798	0.247899	0.231579	0.016807	0.182773	0.283613	0.441176	0.970588	0.371849
0.339726	0.386301	0.273973	0.228022	0.211538	0.236264	0.005479	0.20274	0.520548	0.769863	0.994521	0.013699	0.254795	0.457534	0.70137	1	0.00274	0.265753	0.528767	0.747945	0.969863	0.69589	0.057534	0.246575	0.098901	0.098901	0.005495	0.00274	0.230137	0.468493	0.720548	1	0.019178	0.257534	0.40274	0.526027	0.857534	0.084932	0.339726	0.646575	0.8	0.994521	0.30137	0.505495	0.013699	0.271233	0.512329	0.734247	0.989041	0.383562
0.394937	0.263291	0.341772	0.19797	0.291878	0.208122	0.005063	0.227848	0.475949	0.764557	1	0.012658	0.298734	0.577215	0.75443	0.989873	0.002532	0.225316	0.470886	0.726582	0.994937	0.321519	0.270886	0.407595	0.083756	0.068528	0.002538	0.002532	0.227848	0.546835	0.751899	1	0.106329	0.35443	0.473418	0.610127	0.918987	0.005063	0.255696	0.524051	0.855696	0.994937	0.493671	0.390863	0.010127	0.286076	0.526582	0.729114	0.994937	0.278481
0.403756	0.300469	0.295775	0.231132	0.245283	0.212264	0.014085	0.183099	0.42723	0.713615	1	0.037559	0.342723	0.57277	0.755869	0.981221	0.004695	0.211268	0.469484	0.737089	0.99061	0.342723	0.234742	0.422535	0.084906	0.09434	0.009434	0.004695	0.187793	0.366197	0.704225	1	0.098592	0.206573	0.591549	0.741784	0.962441	0.00939	0.328638	0.511737	0.788732	0.99061	0.455399	0.490566	0.00939	0.28169	0.521127	0.751174	0.99061	0.361502
0.414894	0.212766	0.37234	0.193548	0.354839	0.150538	0.031915	0.159574	0.478723	0.723404	1	0.170213	0.265957	0.489362	0.755319	0.957447	0.010638	0.212766	0.468085	0.744681	0.93617	0.425532	0.574468	0	0.172043	0	0	0.010638	0.234043	0.5	0.744681	1	0.031915	0.265957	0.468085	0.659574	0.93617	0	0	0	0	0	0.425532	0.387097	0.042553	0.297872	0.542553	0.840426	0.946809	0.191489
0.425676	0.310811	0.263514	0.265306	0.190476	0.210884	0.013514	0.202703	0.540541	0.810811	1	0.094595	0.22973	0.47973	0.682432	0.993243	0.006757	0.236486	0.412162	0.689189	0.952703	0.547297	0.22973	0.222973	0.108844	0.040816	0	0.006757	0.175676	0.459459	0.763514	1	0.040541	0.222973	0.425676	0.648649	0.858108	0.297297	0.344595	0.587838	0.912162	0.972973	0.344595	0.367347	0.027027	0.256757	0.439189	0.621622	0.959459	0.304054
0.267663	0.419837	0.3125	0.217687	0.170068	0.228571	0.008152	0.210598	0.411685	0.663043	1	0.002717	0.304348	0.581522	0.808424	0.995924	0.001359	0.21875	0.467391	0.710598	0.998641	0.578804	0.157609	0.263587	0.061224	0.066667	0.001361	0.001359	0.304348	0.581522	0.800272	1	0.009511	0.305707	0.485054	0.671196	0.995924	0.036685	0.160326	0.330163	0.633152	0.978261	0.523098	0.353741	0.009511	0.273098	0.576087	0.813859	0.998641	0.422554
0.319048	0.37619	0.304762	0.248804	0.181818	0.205742	0.009524	0.219048	0.509524	0.766667	0.995238	0.02381	0.242857	0.433333	0.680952	1	0.004762	0.195238	0.585714	0.809524	0.980952	0.533333	0.152381	0.314286	0.076555	0.066986	0	0.004762	0.257143	0.4	0.695238	1	0.014286	0.080952	0.590476	0.747619	0.92381	0.109524	0.209524	0.566667	0.790476	0.980952	0.509524	0.373206	0.019048	0.319048	0.519048	0.752381	0.980952	0.37619
0.355691	0.349593	0.294715	0.258656	0.221996	0.183299	0.004065	0.20935	0.473577	0.73374	0.997967	0.006098	0.292683	0.54878	0.735772	1	0.002033	0.25813	0.455285	0.784553	0.995935	0.477642	0.119919	0.402439	0.05499	0.06721	0.022403	0.002033	0.243902	0.546748	0.715447	1	0.018293	0.237805	0.412602	0.878049	0.95935	0.081301	0.247967	0.479675	0.780488	0.995935	0.46748	0.403259	0.014228	0.268293	0.485772	0.808943	0.995935	0.333333
0.349315	0.303653	0.347032	0.19222	0.26087	0.185355	0.004566	0.260274	0.520548	0.757991	0.995434	0.011416	0.194064	0.477169	0.746575	1	0.002283	0.276256	0.486301	0.737443	0.997717	0.420091	0.196347	0.383562	0.070938	0.070938	0.006865	0.002283	0.180365	0.474886	0.780822	1	0.020548	0.321918	0.543379	0.762557	0.881279	0.077626	0.269406	0.465753	0.730594	0.954338	0.563927	0.338673	0.009132	0.255708	0.461187	0.737443	0.997717	0.305936
0.349456	0.394196	0.256348	0.276029	0.186441	0.196126	0.002418	0.245466	0.525998	0.775091	0.998791	0.003628	0.232164	0.438936	0.702539	0.991536	0.001209	0.291415	0.53688	0.756953	1	0.521161	0.182588	0.296252	0.076271	0.076271	0.001211	0.001209	0.2237	0.446191	0.70133	1	0.007255	0.409915	0.594921	0.787183	0.989117	0.021765	0.261185	0.540508	0.799274	0.974607	0.376058	0.309927	0.006046	0.330109	0.542926	0.764208	0.995163	0.434099
0.27685	0.505967	0.217184	0.236842	0.145933	0.215311	0.00716	0.21957	0.424821	0.747017	0.99284	0.016706	0.362768	0.575179	0.782816	1	0.002387	0.150358	0.334129	0.630072	0.968974	0.653938	0.133652	0.212411	0.047847	0.066986	0	0.002387	0.393795	0.572792	0.792363	1	0.00716	0.090692	0.188544	0.272076	0.565632	0.0358	0.221957	0.377088	0.761337	0.995227	0.639618	0.315789	0.004773	0.315036	0.536993	0.718377	0.990453	0.465394
0.380952	0.35119	0.267857	0.298507	0.18806	0.173134	0.008929	0.232143	0.517857	0.800595	1	0.005952	0.270833	0.508929	0.75	0.994048	0.002976	0.238095	0.443452	0.642857	0.97619	0.443452	0.172619	0.383929	0.080597	0.074627	0.002985	0.002976	0.247024	0.544643	0.803571	1	0.074405	0.202381	0.494048	0.642857	0.931548	0.008929	0.264881	0.46131	0.71131	0.982143	0.369048	0.4	0.014881	0.247024	0.443452	0.645833	0.985119	0.369048
0.380531	0.292035	0.327434	0.276786	0.25	0.1875	0.017699	0.159292	0.424779	0.690265	1	0.035398	0.256637	0.539823	0.778761	0.99115	0.00885	0.238938	0.442478	0.752212	0.982301	0.460177	0.442478	0.097345	0.098214	0.044643	0.008929	0.00885	0.150442	0.504425	0.716814	1	0.026549	0.292035	0.451327	0.60177	0.911504	0.097345	0.106195	0.920354	0.946903	0.973451	0.380531	0.535714	0.026549	0.221239	0.39823	0.734513	0.955752	0.265487
0.367206	0.323326	0.309469	0.217593	0.206019	0.236111	0.004619	0.198614	0.454965	0.73903	1	0.006928	0.247113	0.484988	0.748268	0.995381	0.002309	0.309469	0.56351	0.762125	0.990762	0.466513	0.106236	0.427252	0.041667	0.092593	0.00463	0.002309	0.221709	0.508083	0.7806	1	0.020785	0.371824	0.51963	0.572748	0.986143	0.036952	0.256351	0.487298	0.759815	0.972286	0.515012	0.398148	0.009238	0.364896	0.577367	0.787529	0.990762	0.314088
0.375291	0.393939	0.230769	0.281214	0.165694	0.187865	0.003497	0.20979	0.446387	0.738928	1	0.002331	0.248252	0.509324	0.748252	0.987179	0.001166	0.332168	0.559441	0.754079	0.995338	0.486014	0.16317	0.350816	0.05951	0.087515	0.001167	0.001166	0.213287	0.441725	0.719114	1	0.003497	0.399767	0.614219	0.784382	0.924242	0.017483	0.270396	0.497669	0.744755	0.986014	0.351981	0.289382	0.002331	0.367133	0.55711	0.778555	0.987179	0.437063
0.385925	0.360953	0.253121	0.252273	0.177273	0.184091	0.00454	0.284904	0.627696	0.819523	0.998865	0.00227	0.211124	0.473326	0.711691	0.99319	0.001135	0.250851	0.417707	0.62202	1	0.500568	0.112372	0.38706	0.045455	0.079545	0.006818	0.001135	0.160045	0.494892	0.816118	1	0.095346	0.273553	0.385925	0.497162	0.860386	0.111237	0.300795	0.54143	0.683314	0.979569	0.402951	0.320455	0.003405	0.22815	0.401816	0.587968	0.99546	0.38706
0.360294	0.283088	0.356618	0.173432	0.269373	0.214022	0.007353	0.261029	0.511029	0.779412	0.996324	0.022059	0.268382	0.522059	0.702206	1	0.003676	0.209559	0.455882	0.713235	0.988971	0.404412	0.172794	0.422794	0.055351	0.092251	0.00369	0.003676	0.205882	0.525735	0.713235	1	0.128676	0.227941	0.555147	0.599265	0.985294	0.022059	0.246324	0.485294	0.797794	0.981618	0.569853	0.398524	0.014706	0.227941	0.466912	0.672794	0.988971	0.3125
0.344942	0.33665	0.318408	0.242525	0.232558	0.200997	0.021559	0.271973	0.474295	0.752902	0.996683	0.004975	0.189055	0.45937	0.721393	1	0.001658	0.283582	0.560531	0.78607	0.998342	0.532338	0.140962	0.3267	0.053156	0.066445	0.006645	0.001658	0.15257	0.344942	0.648425	1	0.238806	0.504146	0.681592	0.817579	0.961857	0.013267	0.361526	0.595357	0.792703	0.995025	0.547264	0.352159	0.00995	0.320066	0.533997	0.756219	0.993367	0.353234
0.361963	0.343558	0.294479	0.185185	0.185185	0.265432	0.018405	0.190184	0.429448	0.668712	0.98773	0.01227	0.263804	0.582822	0.785276	1	0.006135	0.257669	0.546012	0.766871	0.981595	0.361963	0.104294	0.533742	0.037037	0.08642	0	0.006135	0.08589	0.263804	0.674847	1	0.527607	0.546012	0.705521	0.822086	0.852761	0.122699	0.337423	0.478528	0.760736	0.98773	0.460123	0.358025	0.03681	0.361963	0.588957	0.754601	0.97546	0.349693
0.430446	0.301837	0.267717	0.234211	0.2	0.192105	0.018373	0.278215	0.593176	0.800525	1	0.005249	0.186352	0.469816	0.71916	0.976378	0.002625	0.265092	0.451444	0.627297	0.971129	0.430446	0.094488	0.475066	0.044737	0.102632	0.002632	0.002625	0.115486	0.39895	0.700787	1	0.086614	0.24147	0.372703	0.48294	0.687664	0.12336	0.354331	0.587927	0.800525	0.992126	0.362205	0.342105	0.089239	0.270341	0.427822	0.56168	0.971129	0.32021
0.359459	0.348649	0.291892	0.265583	0.216802	0.197832	0.005405	0.22973	0.464865	0.762162	0.997297	0.010811	0.218919	0.481081	0.710811	1	0.002703	0.3	0.543243	0.735135	0.994595	0.483784	0.156757	0.359459	0.056911	0.067751	0.00813	0.002703	0.227027	0.540541	0.775676	1	0.235135	0.386486	0.543243	0.683784	0.994595	0.091892	0.2	0.427027	0.751351	0.918919	0.502703	0.325203	0.054054	0.291892	0.5	0.713514	0.994595	0.383784
0.376682	0.32287	0.300448	0.265766	0.202703	0.198198	0.013453	0.215247	0.538117	0.834081	0.986547	0.040359	0.269058	0.529148	0.735426	1	0.004484	0.197309	0.430493	0.672646	0.946188	0.816143	0.06278	0.121076	0.036036	0.063063	0.018018	0.004484	0.273543	0.524664	0.744395	1	0.03139	0.071749	0.313901	0.457399	0.946188	0.026906	0.112108	0.327354	0.901345	0.982063	0.327354	0.432432	0.017937	0.224215	0.443946	0.64574	0.955157	0.376682
0.321918	0.424658	0.253425	0.282759	0.165517	0.255172	0.020548	0.191781	0.506849	0.753425	1	0.013699	0.267123	0.493151	0.746575	0.965753	0.006849	0.253425	0.417808	0.657534	0.945205	0.527397	0.287671	0.184932	0.096552	0.027586	0	0.006849	0.130137	0.452055	0.746575	1	0.150685	0.253425	0.349315	0.684932	0.883562	0.527397	0.561644	0.609589	0.767123	0.815068	0.445205	0.344828	0.034247	0.328767	0.520548	0.719178	0.945205	0.431507
0.427711	0.355422	0.216867	0.260606	0.169697	0.163636	0.03012	0.319277	0.572289	0.777108	1	0.012048	0.210843	0.493976	0.807229	0.993976	0.006024	0.174699	0.36747	0.536145	0.879518	0.554217	0.174699	0.271084	0.060606	0.060606	0.012121	0.006024	0.343373	0.722892	0.861446	1	0.024096	0.060241	0.295181	0.373494	0.554217	0.096386	0.156627	0.433735	0.518072	0.710843	0.445783	0.387879	0.024096	0.222892	0.433735	0.753012	0.975904	0.39759
0.330909	0.334545	0.334545	0.19708	0.229927	0.226277	0.010909	0.247273	0.501818	0.763636	1	0.007273	0.236364	0.487273	0.741818	0.970909	0.003636	0.265455	0.494545	0.723636	0.985455	0.370909	0.178182	0.450909	0.051095	0.10219	0	0.003636	0.181818	0.458182	0.705455	1	0.152727	0.305455	0.392727	0.603636	0.698182	0.007273	0.261818	0.509091	0.818182	0.992727	0.541818	0.394161	0.018182	0.247273	0.469091	0.669091	0.985455	0.341818
0.390572	0.446128	0.1633	0.269815	0.136594	0.141653	0.008418	0.265993	0.537037	0.821549	1	0.003367	0.250842	0.513468	0.708754	0.998316	0.001684	0.215488	0.363636	0.572391	0.838384	0.698653	0.080808	0.220539	0.047218	0.077572	0	0.001684	0.249158	0.510101	0.717172	1	0.055556	0.217172	0.388889	0.538721	0.686869	0.008418	0.265993	0.5	0.845118	0.905724	0.294613	0.306914	0.010101	0.205387	0.355219	0.60101	0.867003	0.469697
0.333938	0.402904	0.263158	0.250909	0.158182	0.229091	0.012704	0.212341	0.508167	0.818512	1	0.00363	0.205082	0.442831	0.716878	0.99637	0.001815	0.321234	0.513612	0.718693	0.970962	0.502722	0.136116	0.361162	0.049091	0.074545	0.005455	0.001815	0.127042	0.366606	0.744102	1	0.168784	0.411978	0.560799	0.720508	0.811252	0.110708	0.346642	0.540835	0.814882	0.958258	0.473684	0.330909	0.005445	0.297641	0.470054	0.693285	0.990926	0.444646
0.312727	0.36	0.327273	0.255474	0.182482	0.237226	0.007273	0.2	0.527273	0.756364	0.989091	0.018182	0.247273	0.48	0.76	1	0.003636	0.236364	0.490909	0.712727	0.996364	0.352727	0.090909	0.556364	0.043796	0.10219	0	0.003636	0.134545	0.392727	0.778182	1	0.050909	0.796364	0.818182	0.861818	0.894545	0.014545	0.32	0.483636	0.658182	0.970909	0.494545	0.350365	0.014545	0.28	0.465455	0.669091	0.992727	0.356364
0.270142	0.407583	0.322275	0.190476	0.209524	0.271429	0.037915	0.208531	0.374408	0.691943	0.971564	0.009479	0.222749	0.526066	0.819905	1	0.004739	0.2891	0.49763	0.7109	0.943128	0.464455	0.374408	0.161137	0.128571	0.061905	0.004762	0.004739	0.265403	0.56872	0.78673	1	0.009479	0.28436	0.43128	0.611374	0.85782	0.07109	0.208531	0.64455	0.881517	0.990521	0.417062	0.428571	0.014218	0.279621	0.450237	0.677725	0.981043	0.42654
0.40625	0.395833	0.197917	0.315789	0.2	0.126316	0.052083	0.21875	0.447917	0.729167	1	0.020833	0.197917	0.489583	0.6875	0.947917	0.010417	0.322917	0.5	0.791667	0.958333	0.583333	0.3125	0.104167	0.094737	0.052632	0.010526	0.010417	0.145833	0.333333	0.520833	1	0.40625	0.65625	0.760417	0.854167	0.979167	0.28125	0.291667	0.572917	0.59375	0.947917	0.427083	0.4	0.114583	0.354167	0.541667	0.75	0.958333	0.4375
0.34647	0.372742	0.280788	0.236842	0.192434	0.220395	0.019704	0.295567	0.481117	0.761905	1	0.003284	0.203612	0.533662	0.737274	0.996716	0.001642	0.226601	0.492611	0.748768	0.998358	0.543514	0.178982	0.277504	0.074013	0.050987	0.001645	0.001642	0.247947	0.54023	0.750411	1	0.003284	0.159278	0.303777	0.500821	0.996716	0.060755	0.356322	0.587849	0.891626	0.986864	0.513957	0.332237	0.003284	0.269294	0.563218	0.740558	0.995074	0.3711
0.375635	0.340102	0.284264	0.259542	0.201018	0.198473	0.010152	0.258883	0.535533	0.769036	1	0.005076	0.261421	0.5	0.753807	0.997462	0.002538	0.218274	0.431472	0.71066	0.982234	0.469543	0.192893	0.337563	0.076336	0.061069	0	0.002538	0.243655	0.520305	0.769036	1	0.19797	0.286802	0.510152	0.624365	0.845178	0.01269	0.126904	0.423858	0.741117	0.98731	0.505076	0.340967	0.025381	0.263959	0.461929	0.692893	0.959391	0.36802
0.274882	0.436019	0.2891	0.204762	0.157143	0.309524	0.066351	0.417062	0.606635	0.791469	0.990521	0.009479	0.189573	0.42654	0.725118	0.981043	0.004739	0.227488	0.412322	0.696682	1	0.492891	0.184834	0.322275	0.071429	0.061905	0.014286	0.004739	0.175355	0.317536	0.492891	1	0.085308	0.232227	0.454976	0.919431	0.995261	0.033175	0.559242	0.668246	0.758294	0.85782	0.511848	0.419048	0.014218	0.28436	0.445498	0.748815	0.995261	0.42654
0.310526	0.373684	0.315789	0.216931	0.195767	0.306878	0.042105	0.142105	0.426316	0.694737	0.973684	0.010526	0.242105	0.521053	0.726316	1	0.005263	0.294737	0.510526	0.773684	0.994737	0.373684	0.273684	0.352632	0.079365	0.100529	0.005291	0.005263	0.205263	0.531579	0.810526	1	0.142105	0.268421	0.357895	0.815789	0.931579	0.031579	0.110526	0.489474	0.7	0.863158	0.452632	0.42328	0.036842	0.278947	0.521053	0.763158	0.978947	0.389474
0.289662	0.450358	0.25998	0.242828	0.148566	0.240779	0.004094	0.185261	0.455476	0.763562	0.998976	0.002047	0.27738	0.524053	0.74002	0.997953	0.001024	0.254862	0.451382	0.743091	1	0.576254	0.107472	0.316274	0.04918	0.071721	0.004098	0.001024	0.323439	0.576254	0.787103	1	0.037871	0.174002	0.30911	0.433982	0.995906	0.047083	0.209826	0.418628	0.735926	0.993859	0.426817	0.432377	0.012282	0.283521	0.510747	0.77175	0.995906	0.456499
0.387234	0.306383	0.306383	0.260684	0.269231	0.153846	0.012766	0.26383	0.519149	0.748936	0.982979	0.008511	0.246809	0.382979	0.723404	1	0.004255	0.174468	0.53617	0.761702	0.991489	0.540426	0.148936	0.310638	0.094017	0.068376	0	0.004255	0.259574	0.404255	0.73617	1	0.012766	0.06383	0.531915	0.757447	0.987234	0.089362	0.187234	0.578723	0.795745	0.957447	0.519149	0.358974	0.017021	0.319149	0.502128	0.753191	0.991489	0.32766
0.3657	0.310214	0.324086	0.20202	0.268939	0.207071	0.002522	0.254729	0.491803	0.742749	1	0.005044	0.240858	0.535939	0.784363	0.993695	0.001261	0.221942	0.479193	0.722573	0.996217	0.464061	0.235813	0.300126	0.102273	0.056818	0.003788	0.001261	0.208071	0.448928	0.737705	1	0.039092	0.199243	0.423707	0.79319	0.996217	0.006305	0.325347	0.577554	0.751576	0.991173	0.57377	0.424242	0.003783	0.266078	0.482976	0.747793	0.996217	0.364439
0.393862	0.294118	0.31202	0.194872	0.266667	0.2	0.007673	0.232737	0.462916	0.716113	0.997442	0.005115	0.240409	0.534527	0.769821	0.97954	0.002558	0.28133	0.514066	0.734015	1	0.40665	0.396419	0.196931	0.105128	0.053846	0.017949	0.002558	0.245524	0.526854	0.767263	1	0.046036	0.219949	0.501279	0.7289	0.953964	0.007673	0.250639	0.475703	0.887468	0.992327	0.450128	0.405128	0.012788	0.283887	0.521739	0.731458	0.987212	0.329923
0.450704	0.232394	0.316901	0.184397	0.297872	0.156028	0.014085	0.225352	0.43662	0.739437	0.992958	0.021127	0.302817	0.549296	0.802817	0.957746	0.007042	0.21831	0.507042	0.690141	1	0.232394	0	0.767606	0	0.12766	0	0.007042	0.260563	0.5	0.690141	1	0	0	0	0	0	0.028169	0.239437	0.464789	0.746479	0.978873	0.535211	0.368794	0.035211	0.302817	0.521127	0.71831	0.922535	0.260563
0.236667	0.413333	0.35	0.200669	0.200669	0.277592	0.02	0.22	0.396667	0.76	0.996667	0.006667	0.243333	0.566667	0.763333	1	0.003333	0.256667	0.496667	0.686667	0.993333	0.613333	0.146667	0.24	0.053512	0.060201	0	0.003333	0.336667	0.646667	0.813333	1	0.023333	0.083333	0.133333	0.356667	0.993333	0.203333	0.31	0.496667	0.556667	0.93	0.51	0.421405	0.013333	0.21	0.436667	0.663333	0.993333	0.42
0.315011	0.422833	0.262156	0.269068	0.152542	0.252119	0.014799	0.160677	0.418605	0.687104	1	0.004228	0.287526	0.54334	0.805497	0.995772	0.002114	0.293869	0.545455	0.729387	0.991543	0.632135	0.164905	0.20296	0.055085	0.038136	0	0.002114	0.188161	0.526427	0.841438	1	0.065539	0.289641	0.458774	0.649049	0.786469	0.084567	0.312896	0.51797	0.682875	0.82241	0.450317	0.322034	0.021142	0.319239	0.556025	0.818182	0.97463	0.427061
0.369085	0.456362	0.174553	0.294737	0.115789	0.146316	0.008412	0.233438	0.542587	0.771819	0.995794	0.002103	0.293375	0.481598	0.769716	1	0.001052	0.221872	0.409043	0.663512	0.994742	0.679285	0.068349	0.252366	0.041053	0.045263	0.009474	0.001052	0.277603	0.543638	0.796004	1	0.037855	0.241851	0.42061	0.602524	0.968454	0.019979	0.218717	0.480547	0.701367	0.993691	0.300736	0.263158	0.009464	0.160883	0.377497	0.528917	0.994742	0.462671
0.433333	0.327381	0.239286	0.280095	0.1764	0.16329	0.004762	0.205952	0.466667	0.8	1	0.002381	0.27619	0.464286	0.733333	0.99881	0.00119	0.385714	0.557143	0.719048	0.991667	0.560714	0.105952	0.333333	0.039333	0.082241	0.003576	0.00119	0.17619	0.345238	0.732143	1	0.014286	0.470238	0.597619	0.704762	0.795238	0.036905	0.415476	0.582143	0.807143	0.997619	0.392857	0.297974	0.008333	0.40119	0.536905	0.709524	0.964286	0.392857
0.341584	0.386139	0.272277	0.273632	0.199005	0.19403	0.014851	0.267327	0.460396	0.69802	1	0.009901	0.183168	0.415842	0.752475	0.99505	0.00495	0.361386	0.594059	0.821782	0.990099	0.485149	0.173267	0.341584	0.059701	0.069652	0.0199	0.00495	0.153465	0.519802	0.712871	1	0.232673	0.292079	0.628713	0.945545	0.990099	0.039604	0.336634	0.435644	0.727723	0.920792	0.475248	0.41791	0.019802	0.346535	0.509901	0.747525	0.985149	0.371287
0.383178	0.35514	0.261682	0.28169	0.234742	0.201878	0.014019	0.219626	0.528037	0.775701	0.995327	0.009346	0.285047	0.5	0.724299	1	0.004673	0.228972	0.481308	0.682243	0.990654	0.415888	0.116822	0.46729	0.056338	0.103286	0	0.004673	0.191589	0.476636	0.682243	1	0.158879	0.182243	0.228972	0.285047	0.607477	0.056075	0.392523	0.635514	0.803738	0.985981	0.565421	0.347418	0.018692	0.247664	0.429907	0.602804	0.915888	0.32243
0.341463	0.382114	0.276423	0.278689	0.196721	0.245902	0.01626	0.195122	0.504065	0.699187	0.99187	0.02439	0.211382	0.479675	0.731707	0.97561	0.00813	0.276423	0.487805	0.756098	1	0.349593	0.219512	0.430894	0.081967	0.065574	0	0.00813	0.211382	0.414634	0.756098	1	0.252033	0.292683	0.373984	0.463415	0.853659	0.065041	0.162602	0.609756	0.715447	0.95935	0.447154	0.278689	0.121951	0.300813	0.471545	0.788618	0.98374	0.382114
0.452991	0.17094	0.376068	0.163793	0.284483	0.137931	0.025641	0.239316	0.512821	0.760684	0.991453	0.017094	0.222222	0.401709	0.675214	1	0.008547	0.273504	0.538462	0.74359	0.982906	0.376068	0.188034	0.435897	0.068966	0.103448	0	0.008547	0.094017	0.376068	0.675214	1	0.213675	0.273504	0.324786	0.700855	0.752137	0.111111	0.444444	0.57265	0.82906	0.957265	0.470085	0.37931	0.042735	0.307692	0.521368	0.726496	0.982906	0.188034
0.320819	0.34471	0.334471	0.232877	0.191781	0.236301	0.013652	0.262799	0.467577	0.764505	0.996587	0.006826	0.194539	0.501706	0.706485	1	0.003413	0.245734	0.508532	0.771331	0.986348	0.443686	0.276451	0.279863	0.10274	0.054795	0.006849	0.003413	0.150171	0.406143	0.607509	1	0.010239	0.194539	0.307167	0.505119	0.699659	0.051195	0.744027	0.825939	0.914676	0.989761	0.566553	0.369863	0.006826	0.262799	0.498294	0.737201	0.982935	0.354949
0.343558	0.404908	0.251534	0.253086	0.179012	0.234568	0.018405	0.282209	0.558282	0.754601	0.97546	0.01227	0.171779	0.447853	0.736196	1	0.006135	0.208589	0.417178	0.687117	0.981595	0.368098	0.190184	0.441718	0.061728	0.098765	0	0.006135	0.147239	0.411043	0.668712	1	0.018405	0.055215	0.343558	0.558282	0.828221	0.134969	0.441718	0.662577	0.797546	0.98773	0.411043	0.481481	0.02454	0.233129	0.441718	0.699387	0.957055	0.503067
0.376721	0.352941	0.270338	0.243108	0.174185	0.197995	0.005006	0.176471	0.434293	0.71214	1	0.010013	0.28035	0.555695	0.773467	0.996245	0.001252	0.345432	0.530663	0.743429	0.998748	0.515645	0.117647	0.366708	0.04386	0.068922	0.006266	0.001252	0.188986	0.379224	0.692115	1	0.005006	0.390488	0.555695	0.710889	0.997497	0.015019	0.366708	0.624531	0.841051	0.992491	0.428035	0.333333	0.003755	0.360451	0.543179	0.763454	0.997497	0.387985
0.283753	0.487414	0.228833	0.243119	0.133028	0.213303	0.006865	0.228833	0.430206	0.677346	0.997712	0.004577	0.235698	0.553776	0.764302	1	0.002288	0.299771	0.498856	0.748284	0.961098	0.702517	0.141876	0.155606	0.057339	0.048165	0.002294	0.002288	0.281465	0.610984	0.789474	1	0.032037	0.210526	0.304348	0.421053	0.963387	0.048055	0.270023	0.437071	0.521739	0.938215	0.585812	0.330275	0.011442	0.322654	0.592677	0.750572	0.988558	0.462243
0.442308	0.427885	0.129808	0.415459	0.111111	0.10628	0.014423	0.269231	0.514423	0.716346	1	0.009615	0.307692	0.581731	0.807692	0.990385	0.004808	0.100962	0.192308	0.326923	0.947115	0.759615	0.129808	0.110577	0.048309	0.048309	0	0.004808	0.413462	0.605769	0.802885	1	0.014423	0.139423	0.1875	0.307692	0.341346	0.072115	0.091346	0.216346	0.245192	0.879808	0.278846	0.318841	0.019231	0.158654	0.322115	0.673077	0.961538	0.466346
0.339928	0.348921	0.311151	0.236036	0.236036	0.185586	0.008993	0.206835	0.458633	0.735612	0.98741	0.007194	0.269784	0.501799	0.767986	0.998201	0.001799	0.242806	0.516187	0.733813	1	0.381295	0.07554	0.543165	0.030631	0.113514	0.001802	0.001799	0.278777	0.561151	0.834532	1	0.214029	0.273381	0.420863	0.476619	0.744604	0.003597	0.194245	0.494604	0.715827	0.989209	0.56295	0.410811	0.005396	0.285971	0.505396	0.77518	0.996403	0.372302
0.375	0.306818	0.318182	0.252874	0.229885	0.16092	0.034091	0.238636	0.477273	0.647727	0.988636	0.022727	0.193182	0.534091	0.727273	0.965909	0.011364	0.284091	0.465909	0.761364	1	0.454545	0.511364	0.034091	0.114943	0.022989	0.022989	0.011364	0.215909	0.556818	0.670455	1	0.102273	0.284091	0.477273	0.738636	0.988636	0.045455	0.045455	0.045455	0.943182	0.954545	0.363636	0.45977	0.125	0.272727	0.465909	0.761364	0.965909	0.284091
0.356077	0.353945	0.289979	0.267094	0.215812	0.179487	0.004264	0.204691	0.420043	0.731343	0.995736	0.027719	0.232409	0.486141	0.727079	1	0.002132	0.339019	0.5629	0.784648	0.989339	0.484009	0.025586	0.490405	0.017094	0.08547	0	0.002132	0.183369	0.309168	0.682303	1	0.014925	0.01919	0.191898	0.968017	0.974414	0.059701	0.424307	0.575693	0.771855	0.948827	0.458422	0.435897	0.014925	0.34968	0.550107	0.765458	0.989339	0.405117
0.4	0.333333	0.266667	0.244094	0.228346	0.216535	0.011765	0.278431	0.47451	0.709804	0.988235	0.007843	0.223529	0.478431	0.760784	1	0.003922	0.262745	0.537255	0.780392	0.996078	0.396078	0.223529	0.380392	0.070866	0.055118	0	0.003922	0.231373	0.454902	0.792157	1	0.039216	0.270588	0.352941	0.772549	0.992157	0.109804	0.2	0.529412	0.698039	0.882353	0.501961	0.425197	0.019608	0.243137	0.537255	0.784314	0.976471	0.286275
0.454545	0.363636	0.181818	0.367816	0.172414	0.114943	0.034091	0.227273	0.454545	0.795455	1	0.022727	0.272727	0.534091	0.704545	0.988636	0.011364	0.318182	0.443182	0.75	0.943182	0.170455	0.011364	0.818182	0.022989	0.068966	0	0.011364	0.034091	0.488636	0.772727	1	0.761364	0.761364	0.761364	0.761364	0.761364	0.056818	0.25	0.454545	0.693182	0.977273	0.340909	0.45977	0.079545	0.352273	0.579545	0.75	0.943182	0.386364
0.313433	0.380597	0.30597	0.233083	0.18797	0.157895	0.037313	0.238806	0.567164	0.761194	0.985075	0.029851	0.261194	0.440299	0.649254	0.977612	0.007463	0.179104	0.514925	0.738806	1	0.574627	0.350746	0.074627	0.225564	0.030075	0	0.007463	0.261194	0.477612	0.746269	1	0.014925	0.149254	0.410448	0.604478	0.992537	0.873134	0.880597	0.925373	0.940299	0.962687	0.5	0.345865	0.044776	0.253731	0.552239	0.738806	0.970149	0.425373
0.349345	0.355167	0.295488	0.247813	0.225948	0.186589	0.002911	0.269287	0.532751	0.761281	1	0.014556	0.243086	0.499272	0.742358	0.994178	0.001456	0.234352	0.462882	0.730713	0.998544	0.365357	0.211063	0.423581	0.102041	0.075802	0.005831	0.001456	0.259098	0.491994	0.820961	1	0.008734	0.206696	0.416303	0.88064	0.997089	0.032023	0.285298	0.540029	0.681223	0.925764	0.534207	0.393586	0.010189	0.247453	0.467249	0.69869	0.998544	0.378457
0.371901	0.285124	0.342975	0.224066	0.278008	0.182573	0.012397	0.256198	0.582645	0.77686	1	0.008264	0.210744	0.433884	0.652893	0.983471	0.004132	0.227273	0.454545	0.735537	0.987603	0.446281	0.305785	0.247934	0.13278	0.058091	0	0.004132	0.252066	0.471074	0.698347	1	0.115702	0.260331	0.454545	0.72314	0.913223	0.008264	0.086777	0.590909	0.801653	0.983471	0.528926	0.456432	0.016529	0.301653	0.491736	0.739669	0.987603	0.264463
0.451939	0.298482	0.249578	0.280405	0.206081	0.179054	0.008432	0.273187	0.499157	0.730185	0.996627	0.003373	0.264755	0.475548	0.745363	0.998314	0.001686	0.220911	0.51602	0.772344	1	0.51602	0.129848	0.354132	0.054054	0.084459	0	0.001686	0.234401	0.460371	0.655987	1	0.11973	0.219224	0.337268	0.790894	0.991568	0.016863	0.300169	0.625632	0.865093	0.984823	0.318718	0.361486	0.005059	0.175379	0.504216	0.79258	0.993255	0.338954
0.295082	0.472131	0.232787	0.223684	0.190789	0.180921	0.013115	0.2	0.367213	0.580328	0.993443	0.006557	0.390164	0.652459	0.829508	1	0.003279	0.134426	0.380328	0.645902	0.996721	0.691803	0.098361	0.209836	0.039474	0.072368	0	0.003279	0.321311	0.514754	0.740984	1	0.013115	0.101639	0.134426	0.213115	0.354098	0.052459	0.163934	0.609836	0.84918	0.95082	0.468852	0.440789	0.009836	0.285246	0.531148	0.72459	0.937705	0.47541
0.330935	0.359712	0.309353	0.202899	0.217391	0.23913	0.014388	0.302158	0.503597	0.827338	0.985612	0.028777	0.280576	0.532374	0.719424	1	0.007194	0.194245	0.410072	0.647482	0.992806	0.345324	0.309353	0.345324	0.123188	0.07971	0.007246	0.007194	0.230216	0.453237	0.697842	1	0.021583	0.258993	0.489209	0.71223	0.992806	0.05036	0.129496	0.539568	0.798561	0.913669	0.539568	0.463768	0.021583	0.23741	0.489209	0.726619	0.978417	0.467626
0.382139	0.419522	0.198339	0.267152	0.138254	0.155925	0.005192	0.283489	0.528557	0.797508	0.995846	0.003115	0.253375	0.505711	0.751817	1	0.001038	0.195223	0.413292	0.654206	0.966771	0.64486	0.095535	0.259605	0.053015	0.071726	0.003119	0.001038	0.233645	0.483904	0.779855	1	0.006231	0.264798	0.491173	0.732087	0.856698	0.016615	0.244029	0.509865	0.697819	0.993769	0.336449	0.293139	0.004154	0.141225	0.390447	0.63136	0.966771	0.439252
0.367816	0.275862	0.356322	0.255814	0.290698	0.186047	0.034483	0.252874	0.482759	0.770115	1	0.126437	0.275862	0.574713	0.747126	0.965517	0.011494	0.114943	0.413793	0.643678	0.988506	0.448276	0.321839	0.229885	0.139535	0.046512	0	0.011494	0.229885	0.643678	0.793103	1	0.045977	0.298851	0.597701	0.816092	0.954023	0.137931	0.183908	0.390805	0.448276	0.505747	0.367816	0.418605	0.045977	0.206897	0.45977	0.62069	0.977011	0.321839
0.38069	0.364138	0.255172	0.243094	0.185083	0.189227	0.030345	0.284138	0.543448	0.771034	0.994483	0.002759	0.143448	0.415172	0.691034	1	0.001379	0.311724	0.53931	0.764138	0.997241	0.495172	0.092414	0.412414	0.044199	0.058011	0.002762	0.001379	0.147586	0.391724	0.662069	1	0.131034	0.313103	0.515862	0.842759	0.90069	0.044138	0.306207	0.630345	0.787586	0.986207	0.438621	0.403315	0.008276	0.315862	0.533793	0.743448	0.986207	0.361379
0.388383	0.369021	0.242597	0.287343	0.191562	0.173318	0.004556	0.323462	0.595672	0.816629	0.998861	0.002278	0.224374	0.473804	0.722096	0.994305	0.001139	0.214123	0.411162	0.646925	1	0.501139	0.120729	0.378132	0.051311	0.085519	0.003421	0.001139	0.214123	0.550114	0.790433	1	0.045558	0.258542	0.41344	0.657175	0.867882	0.059226	0.266515	0.472665	0.675399	0.98861	0.403189	0.330673	0.004556	0.222096	0.414579	0.6082	0.980638	0.405467
0.351351	0.316953	0.331695	0.184729	0.268473	0.23399	0.004914	0.206388	0.481572	0.788698	0.995086	0.007371	0.289926	0.498771	0.724816	0.980344	0.002457	0.2457	0.501229	0.746929	1	0.339066	0.223587	0.437346	0.078818	0.083744	0	0.002457	0.277641	0.459459	0.756757	1	0.012285	0.181818	0.375921	0.513514	0.95086	0.04914	0.299754	0.609337	0.798526	0.997543	0.592138	0.438424	0.007371	0.287469	0.4914	0.722359	0.997543	0.316953
0.389432	0.27593	0.334638	0.186275	0.256863	0.201961	0.003914	0.217221	0.516634	0.755382	0.996086	0.007828	0.240705	0.471624	0.708415	0.998043	0.001957	0.262231	0.48728	0.761252	1	0.365949	0.162427	0.471624	0.07451	0.082353	0.015686	0.001957	0.277886	0.530333	0.735812	1	0.005871	0.409002	0.604697	0.776908	0.984344	0.011742	0.205479	0.393346	0.74364	0.996086	0.455969	0.407843	0.005871	0.268102	0.46184	0.726027	0.992172	0.266145
0.3674	0.373868	0.258732	0.244819	0.190415	0.203368	0.002587	0.27555	0.535576	0.76326	0.998706	0.003881	0.201811	0.447607	0.719276	0.996119	0.001294	0.26132	0.543338	0.773609	1	0.597671	0.142303	0.260026	0.069948	0.059585	0.002591	0.001294	0.194049	0.429495	0.654592	1	0.060802	0.401035	0.635188	0.791721	0.997413	0.021992	0.344114	0.609314	0.873221	0.968952	0.394567	0.375648	0.012937	0.218629	0.454075	0.736093	0.997413	0.411384
0.341176	0.382353	0.276471	0.248521	0.236686	0.218935	0.023529	0.276471	0.582353	0.841176	0.994118	0.011765	0.170588	0.441176	0.705882	1	0.005882	0.205882	0.411765	0.7	0.970588	0.376471	0.170588	0.452941	0.059172	0.08284	0	0.005882	0.141176	0.364706	0.582353	1	0.023529	0.058824	0.335294	0.4	0.805882	0.135294	0.441176	0.688235	0.852941	0.988235	0.417647	0.508876	0.029412	0.229412	0.441176	0.717647	0.970588	0.417647
0.34375	0.330357	0.325893	0.215247	0.282511	0.206278	0.017857	0.245536	0.477679	0.799107	1	0.008929	0.200893	0.513393	0.709821	0.995536	0.004464	0.254464	0.482143	0.705357	0.9375	0.459821	0.379464	0.160714	0.116592	0.06278	0.008969	0.004464	0.325893	0.629464	0.821429	1	0.022321	0.209821	0.424107	0.607143	0.857143	0.089286	0.125	0.272321	0.732143	0.924107	0.40625	0.430493	0.026786	0.25	0.4375	0.651786	0.9375	0.370536
0.413534	0.270677	0.315789	0.242424	0.212121	0.128788	0.030075	0.240602	0.556391	0.796992	0.992481	0.022556	0.225564	0.413534	0.578947	1	0.007519	0.255639	0.503759	0.699248	0.984962	0.270677	0.360902	0.368421	0.045455	0.075758	0.015152	0.007519	0.120301	0.330827	0.609023	1	0.150376	0.669173	0.759398	0.864662	0.954887	0.052632	0.263158	0.383459	0.518797	0.977444	0.406015	0.424242	0.150376	0.300752	0.511278	0.699248	0.93985	0.300752
0.334247	0.386301	0.279452	0.255144	0.183813	0.1893	0.00274	0.228767	0.482192	0.715068	0.99589	0.00411	0.319178	0.636986	0.857534	0.99863	0.00137	0.216438	0.4	0.587671	1	0.49589	0.050685	0.453425	0.032922	0.093278	0.002743	0.00137	0.445205	0.683562	0.871233	1	0.009589	0.646575	0.676712	0.741096	0.889041	0.020548	0.191781	0.334247	0.478082	0.856164	0.491781	0.386831	0.005479	0.224658	0.471233	0.79589	0.99726	0.442466
0.373239	0.366197	0.260563	0.276596	0.212766	0.120567	0.014085	0.267606	0.542254	0.760563	1	0.021127	0.28169	0.492958	0.866197	0.992958	0.007042	0.161972	0.338028	0.570423	0.746479	0.443662	0.197183	0.359155	0.070922	0.099291	0.014184	0.007042	0.309859	0.669014	0.859155	1	0.028169	0.070423	0.34507	0.43662	0.647887	0.112676	0.190141	0.528169	0.732394	0.943662	0.380282	0.340426	0.028169	0.161972	0.408451	0.556338	0.943662	0.246479
0.355346	0.314465	0.330189	0.215748	0.247244	0.223622	0.003145	0.237421	0.528302	0.779874	0.990566	0.012579	0.207547	0.448113	0.677673	1	0.001572	0.287736	0.539308	0.773585	0.998428	0.383648	0.190252	0.426101	0.075591	0.07874	0.006299	0.001572	0.289308	0.517296	0.801887	1	0.006289	0.193396	0.356918	0.858491	0.996855	0.031447	0.267296	0.537736	0.666667	0.946541	0.566038	0.387402	0.007862	0.254717	0.471698	0.712264	0.998428	0.33805
0.385281	0.320346	0.294372	0.247826	0.230435	0.182609	0.038961	0.25974	0.47619	0.744589	0.987013	0.008658	0.181818	0.463203	0.649351	1	0.004329	0.277056	0.614719	0.796537	0.995671	0.515152	0.225108	0.25974	0.104348	0.052174	0.008696	0.004329	0.337662	0.510823	0.709957	1	0.112554	0.30303	0.545455	0.822511	0.896104	0.012987	0.073593	0.246753	0.78355	0.965368	0.47619	0.408696	0.030303	0.255411	0.571429	0.74026	0.961039	0.320346
0.459184	0.306122	0.234694	0.276923	0.220513	0.123077	0.015306	0.30102	0.566327	0.729592	1	0.010204	0.285714	0.678571	0.811224	0.979592	0.005102	0.158163	0.311224	0.489796	0.984694	0.576531	0.265306	0.158163	0.066667	0.025641	0.005128	0.005102	0.30102	0.69898	0.852041	1	0.096939	0.178571	0.270408	0.428571	0.785714	0.061224	0.464286	0.581633	0.622449	0.663265	0.321429	0.25641	0.020408	0.168367	0.260204	0.469388	0.984694	0.326531
0.508197	0.35363	0.138173	0.394366	0.133803	0.079812	0.007026	0.306792	0.620609	0.786885	1	0.004684	0.208431	0.454333	0.716628	0.995316	0.002342	0.114754	0.327869	0.477752	0.997658	0.716628	0.067916	0.215457	0.042254	0.046948	0	0.002342	0.320843	0.613583	0.800937	1	0.323185	0.384075	0.423888	0.477752	0.964871	0.032787	0.105386	0.250585	0.370023	0.995316	0.248244	0.267606	0.018735	0.107728	0.330211	0.447307	0.98829	0.377049
0.464103	0.310256	0.225641	0.275064	0.195373	0.151671	0.007692	0.292308	0.551282	0.771795	1	0.005128	0.212821	0.441026	0.725641	0.997436	0.002564	0.238462	0.45641	0.717949	0.946154	0.497436	0.158974	0.34359	0.071979	0.061697	0	0.002564	0.202564	0.446154	0.764103	1	0.007692	0.323077	0.5	0.689744	0.866667	0.048718	0.248718	0.584615	0.728205	0.928205	0.346154	0.359897	0.010256	0.238462	0.464103	0.725641	0.992308	0.317949
0.34188	0.358974	0.299145	0.215517	0.215517	0.224138	0.051282	0.213675	0.42735	0.709402	0.991453	0.017094	0.299145	0.615385	0.735043	1	0.008547	0.179487	0.444444	0.74359	0.982906	0.367521	0.179487	0.452991	0.086207	0.103448	0	0.008547	0.358974	0.57265	0.760684	1	0.025641	0.059829	0.393162	0.623932	0.820513	0.094017	0.196581	0.478632	0.709402	0.982906	0.512821	0.396552	0.034188	0.324786	0.512821	0.717949	0.982906	0.367521
0.448598	0.364486	0.186916	0.276995	0.150235	0.14554	0.014019	0.200935	0.457944	0.635514	1	0.009346	0.317757	0.556075	0.803738	0.995327	0.004673	0.242991	0.565421	0.813084	0.985981	0.593458	0.018692	0.38785	0.018779	0.037559	0	0.004673	0.341121	0.691589	0.841121	1	0.373832	0.373832	0.378505	0.873832	0.878505	0.065421	0.154206	0.266355	0.537383	0.668224	0.294393	0.356808	0.079439	0.247664	0.640187	0.836449	0.985981	0.406542
0.437956	0.321168	0.240876	0.323529	0.198529	0.132353	0.014599	0.291971	0.518248	0.781022	1	0.021898	0.182482	0.474453	0.70073	0.970803	0.007299	0.211679	0.459854	0.635036	0.934307	0.467153	0.211679	0.321168	0.088235	0.088235	0	0.007299	0.226277	0.459854	0.722628	1	0.036496	0.080292	0.489051	0.817518	0.890511	0.138686	0.29927	0.583942	0.664234	0.978102	0.386861	0.352941	0.036496	0.226277	0.452555	0.635036	0.934307	0.277372
0.348315	0.286517	0.365169	0.19774	0.271186	0.231638	0.016854	0.230337	0.466292	0.713483	1	0.022472	0.179775	0.47191	0.724719	0.994382	0.005618	0.275281	0.52809	0.769663	0.977528	0.432584	0.41573	0.151685	0.141243	0.050847	0.00565	0.005618	0.196629	0.52809	0.808989	1	0.016854	0.331461	0.494382	0.696629	0.983146	0.073034	0.101124	0.258427	0.623596	0.865169	0.460674	0.508475	0.011236	0.258427	0.483146	0.730337	0.983146	0.325843
0.415385	0.292308	0.292308	0.248062	0.286822	0.20155	0.030769	0.223077	0.476923	0.738462	1	0.023077	0.230769	0.538462	0.746154	0.992308	0.007692	0.238462	0.484615	0.676923	0.915385	0.484615	0.238462	0.276923	0.077519	0.062016	0	0.007692	0.123077	0.407692	0.738462	1	0.146154	0.192308	0.507692	0.861538	0.923077	0.084615	0.346154	0.661538	0.730769	0.815385	0.361538	0.372093	0.161538	0.315385	0.561538	0.715385	0.915385	0.269231
0.307971	0.362319	0.32971	0.210909	0.221818	0.210909	0.021739	0.26087	0.518116	0.768116	1	0.007246	0.221014	0.42029	0.721014	0.996377	0.003623	0.289855	0.51087	0.742754	0.98913	0.460145	0.257246	0.282609	0.087273	0.058182	0	0.003623	0.242754	0.423913	0.677536	1	0.123188	0.221014	0.5	0.721014	0.858696	0.007246	0.380435	0.561594	0.913043	0.985507	0.550725	0.356364	0.014493	0.304348	0.528986	0.742754	0.98913	0.427536
0.340479	0.30517	0.354351	0.195707	0.233586	0.214646	0.003783	0.240858	0.514502	0.774275	0.998739	0.002522	0.250946	0.471627	0.709962	1	0.001261	0.258512	0.509458	0.759142	0.997478	0.319042	0.025221	0.655738	0.011364	0.082071	0.003788	0.001261	0.238335	0.390921	0.663304	1	0.363178	0.368222	0.542245	0.762926	0.789407	0.032787	0.244641	0.527112	0.781841	0.997478	0.544767	0.376263	0.025221	0.262295	0.481715	0.741488	0.994956	0.319042
0.262009	0.406114	0.331878	0.179825	0.188596	0.25	0.0131	0.248908	0.432314	0.733624	0.973799	0.017467	0.310044	0.580786	0.755459	0.991266	0.004367	0.218341	0.449782	0.71179	1	0.716157	0.148472	0.135371	0.087719	0.035088	0	0.004367	0.257642	0.598253	0.777293	1	0.039301	0.19214	0.336245	0.406114	0.947598	0.078603	0.262009	0.296943	0.449782	0.991266	0.611354	0.324561	0.021834	0.292576	0.628821	0.79476	0.9869	0.401747
0.418605	0.348837	0.232558	0.3125	0.226562	0.1875	0.062016	0.325581	0.573643	0.821705	1	0.015504	0.186047	0.472868	0.744186	0.992248	0.007752	0.193798	0.410853	0.542636	0.945736	0.534884	0.139535	0.325581	0.0625	0.078125	0	0.007752	0.302326	0.697674	0.829457	1	0.023256	0.108527	0.147287	0.503876	0.914729	0.209302	0.27907	0.44186	0.565891	0.651163	0.387597	0.421875	0.015504	0.155039	0.372093	0.627907	0.829457	0.333333
0.302521	0.436975	0.260504	0.254237	0.161017	0.20339	0.042017	0.184874	0.554622	0.865546	1	0.02521	0.268908	0.428571	0.722689	0.932773	0.008403	0.252101	0.487395	0.689076	0.966387	0.436975	0.151261	0.411765	0.050847	0.084746	0	0.008403	0.193277	0.352941	0.714286	1	0.243697	0.268908	0.436975	0.731092	0.773109	0.033613	0.487395	0.596639	0.857143	0.966387	0.453782	0.355932	0.067227	0.394958	0.537815	0.739496	0.966387	0.411765
0.347165	0.417704	0.235131	0.270083	0.171745	0.17867	0.008299	0.261411	0.547718	0.775934	1	0.011065	0.26971	0.525588	0.757953	0.998617	0.001383	0.211618	0.392808	0.69018	0.991701	0.759336	0.107884	0.13278	0.044321	0.044321	0.00277	0.001383	0.304288	0.550484	0.780083	1	0.002766	0.215768	0.319502	0.576763	0.858921	0.058091	0.192254	0.298755	0.687414	0.959889	0.392808	0.357341	0.002766	0.211618	0.417704	0.596127	0.97787	0.42462
0.320261	0.427015	0.252723	0.281659	0.172489	0.21179	0.008715	0.285403	0.529412	0.736383	0.991285	0.004357	0.222222	0.509804	0.729847	0.997821	0.002179	0.248366	0.431373	0.808279	1	0.69281	0.067538	0.239651	0.048035	0.052402	0.004367	0.002179	0.222222	0.507625	0.690632	1	0.061002	0.224401	0.446623	0.738562	0.910675	0.008715	0.320261	0.535948	0.91939	0.982571	0.418301	0.414847	0.013072	0.224401	0.427015	0.753813	0.989107	0.433551
0.433333	0.288889	0.277778	0.258427	0.247191	0.168539	0.033333	0.244444	0.5	0.777778	1	0.022222	0.155556	0.444444	0.622222	0.988889	0.011111	0.222222	0.433333	0.688889	0.955556	0.177778	0	0.822222	0	0.067416	0	0.011111	0.044444	0.711111	0.755556	1	0	0	0	0	0	0.055556	0.244444	0.488889	0.688889	0.977778	0.322222	0.426966	0.077778	0.355556	0.555556	0.688889	0.955556	0.266667
0.328244	0.332061	0.339695	0.187739	0.214559	0.226054	0.007634	0.244275	0.515267	0.767176	1	0.015267	0.206107	0.431298	0.71374	0.98855	0.003817	0.263359	0.48855	0.721374	0.996183	0.381679	0.187023	0.431298	0.05364	0.099617	0	0.003817	0.20229	0.423664	0.683206	1	0.125954	0.301527	0.39313	0.614504	0.71374	0.022901	0.255725	0.515267	0.832061	0.992366	0.553435	0.40613	0.030534	0.225191	0.442748	0.641221	0.98855	0.335878
0.389474	0.336842	0.273684	0.297872	0.244681	0.191489	0.031579	0.189474	0.463158	0.736842	1	0.021053	0.273684	0.505263	0.757895	0.947368	0.010526	0.231579	0.410526	0.684211	0.978947	0.2	0	0.8	0	0.06383	0	0.010526	0.473684	0.526316	0.789474	1	0	0	0	0	0	0.042105	0.231579	0.431579	0.694737	0.978947	0.305263	0.425532	0.073684	0.326316	0.568421	0.715789	0.978947	0.294737
0.28363	0.458671	0.257699	0.23539	0.167208	0.211039	0.003241	0.333874	0.549433	0.764992	0.983793	0.004862	0.19611	0.439222	0.748784	1	0.001621	0.28363	0.487844	0.71799	0.996759	0.675851	0.111831	0.212318	0.053571	0.056818	0.001623	0.001621	0.212318	0.453809	0.753647	1	0.037277	0.371151	0.539708	0.692058	0.952998	0.004862	0.23987	0.555916	0.779579	0.983793	0.452188	0.36039	0.008104	0.215559	0.491086	0.740681	0.990276	0.442464
0.328063	0.355731	0.316206	0.238095	0.202381	0.230159	0.01581	0.252964	0.466403	0.750988	1	0.011858	0.245059	0.549407	0.794466	0.988142	0.003953	0.217391	0.462451	0.699605	0.992095	0.312253	0.083004	0.604743	0.035714	0.115079	0.003968	0.003953	0.150198	0.462451	0.782609	1	0.201581	0.806324	0.857708	0.87747	0.909091	0.011858	0.27668	0.454545	0.648221	0.992095	0.529644	0.365079	0.007905	0.256917	0.438735	0.656126	0.992095	0.383399
0.369674	0.240602	0.389724	0.151819	0.301129	0.194479	0.002506	0.25188	0.494987	0.766917	1	0.017544	0.263158	0.515038	0.73183	0.97995	0.001253	0.229323	0.47995	0.745614	0.997494	0.461153	0.243108	0.295739	0.096612	0.053952	0.003764	0.001253	0.234336	0.45614	0.740602	1	0.038847	0.199248	0.418546	0.799499	0.997494	0.006266	0.323308	0.570175	0.704261	0.992481	0.568922	0.391468	0.003759	0.260652	0.472431	0.738095	0.997494	0.270677
0.260274	0.452055	0.287671	0.21978	0.181319	0.244505	0.005479	0.210959	0.441096	0.750685	0.980822	0.008219	0.290411	0.550685	0.747945	1	0.00274	0.205479	0.435616	0.706849	0.991781	0.539726	0.2	0.260274	0.082418	0.038462	0	0.00274	0.290411	0.542466	0.712329	1	0.032877	0.134247	0.309589	0.79726	0.926027	0.09589	0.216438	0.449315	0.865753	0.99726	0.468493	0.39011	0.038356	0.276712	0.506849	0.720548	0.972603	0.468493
0.376494	0.340637	0.282869	0.225549	0.213573	0.217565	0.003984	0.227092	0.51992	0.75498	0.994024	0.011952	0.260956	0.505976	0.729084	0.988048	0.001992	0.23506	0.464143	0.739044	1	0.511952	0.205179	0.282869	0.083832	0.051896	0	0.001992	0.241036	0.50996	0.798805	1	0.02988	0.173307	0.38247	0.59761	0.996016	0.053785	0.304781	0.569721	0.772908	0.98008	0.496016	0.335329	0.027888	0.268924	0.543825	0.800797	0.978088	0.344622
0.294698	0.40074	0.304562	0.253086	0.164198	0.244444	0.003699	0.268804	0.521578	0.734895	0.995068	0.002466	0.22688	0.491985	0.745993	1	0.001233	0.250308	0.489519	0.763255	0.998767	0.442663	0.187423	0.369914	0.080247	0.07284	0.003704	0.001233	0.297164	0.532676	0.786683	1	0.003699	0.173859	0.414303	0.875462	0.991369	0.023428	0.241677	0.484587	0.614057	0.95561	0.520345	0.402469	0.004932	0.244143	0.452528	0.691739	0.996301	0.418002
0.283154	0.412186	0.304659	0.223022	0.183453	0.251799	0.089606	0.329749	0.551971	0.795699	1	0.007168	0.164875	0.405018	0.698925	0.992832	0.003584	0.318996	0.569892	0.756272	0.97491	0.483871	0.197133	0.318996	0.089928	0.082734	0.010791	0.003584	0.204301	0.523297	0.767025	1	0.007168	0.232975	0.508961	0.731183	0.939068	0.100358	0.293907	0.458781	0.655914	0.956989	0.451613	0.446043	0.010753	0.293907	0.530466	0.731183	0.971326	0.422939
0.285106	0.404255	0.310638	0.24359	0.149573	0.247863	0.008511	0.208511	0.425532	0.791489	0.995745	0.021277	0.195745	0.476596	0.72766	1	0.004255	0.323404	0.519149	0.676596	0.970213	0.47234	0.242553	0.285106	0.068376	0.051282	0	0.004255	0.259574	0.378723	0.642553	1	0.114894	0.204255	0.514894	0.697872	0.834043	0.008511	0.4	0.591489	0.902128	0.974468	0.557447	0.307692	0.034043	0.314894	0.557447	0.73617	0.970213	0.451064
0.316327	0.331633	0.352041	0.2	0.241026	0.235897	0.010204	0.229592	0.484694	0.709184	0.994898	0.02551	0.239796	0.510204	0.826531	1	0.005102	0.244898	0.459184	0.673469	0.989796	0.382653	0.403061	0.214286	0.164103	0.030769	0	0.005102	0.219388	0.515306	0.755102	1	0.015306	0.173469	0.47449	0.683673	0.989796	0.336735	0.382653	0.438776	0.790816	0.846939	0.479592	0.451282	0.020408	0.362245	0.505102	0.693878	0.959184	0.30102
0.31746	0.376984	0.305556	0.215139	0.195219	0.247012	0.02381	0.301587	0.527778	0.797619	1	0.007937	0.257937	0.511905	0.738095	0.972222	0.003968	0.202381	0.43254	0.68254	0.996032	0.305556	0.011905	0.68254	0.007968	0.12749	0	0.003968	0.206349	0.428571	0.666667	1	0.984127	0.984127	0.984127	0.988095	0.992063	0.011905	0.25	0.507937	0.75	0.968254	0.555556	0.390438	0.011905	0.265873	0.511905	0.706349	0.996032	0.380952
0.415873	0.260317	0.32381	0.191083	0.321656	0.178344	0.009524	0.273016	0.520635	0.726984	1	0.019048	0.184127	0.422222	0.75873	0.993651	0.003175	0.247619	0.501587	0.777778	0.996825	0.212698	0.066667	0.720635	0.041401	0.079618	0.003185	0.003175	0.184127	0.412698	0.539683	1	0.11746	0.396825	0.485714	0.533333	0.996825	0.012698	0.263492	0.565079	0.755556	0.971429	0.450794	0.528662	0.012698	0.212698	0.47619	0.777778	0.996825	0.307937
0.389671	0.239437	0.370892	0.152941	0.284706	0.183529	0.004695	0.253521	0.502347	0.753521	0.997653	0.035211	0.232394	0.521127	0.751174	1	0.002347	0.239437	0.474178	0.730047	0.992958	0.359155	0.140845	0.5	0.070588	0.089412	0.004706	0.002347	0.206573	0.549296	0.809859	1	0.039906	0.279343	0.518779	0.91784	0.995305	0.007042	0.253521	0.460094	0.704225	0.946009	0.586854	0.343529	0.00939	0.246479	0.462441	0.669014	0.992958	0.239437
0.359375	0.317708	0.322917	0.230366	0.209424	0.26178	0.020833	0.244792	0.46875	0.755208	0.963542	0.010417	0.229167	0.489583	0.703125	0.989583	0.005208	0.25	0.510417	0.75	1	0.46875	0.208333	0.322917	0.109948	0.057592	0.005236	0.005208	0.317708	0.567708	0.713542	1	0.161458	0.338542	0.463542	0.755208	0.994792	0.015625	0.109375	0.307292	0.822917	0.96875	0.484375	0.460733	0.026042	0.270833	0.505208	0.734375	0.994792	0.307292
0.32	0.429565	0.250435	0.252613	0.155052	0.236934	0.005217	0.170435	0.415652	0.695652	0.984348	0.003478	0.332174	0.582609	0.786087	1	0.001739	0.198261	0.429565	0.726957	0.998261	0.732174	0.109565	0.158261	0.041812	0.04878	0.003484	0.001739	0.349565	0.58087	0.8	1	0.062609	0.18087	0.246957	0.328696	0.956522	0.073043	0.163478	0.34087	0.426087	0.733913	0.438261	0.327526	0.024348	0.276522	0.549565	0.812174	0.991304	0.445217
0.378378	0.27027	0.351351	0.19661	0.281356	0.216949	0.02027	0.216216	0.422297	0.702703	1	0.006757	0.266892	0.547297	0.777027	0.993243	0.003378	0.256757	0.510135	0.760135	0.996622	0.405405	0.081081	0.513514	0.044068	0.084746	0.016949	0.003378	0.27027	0.570946	0.783784	1	0.256757	0.287162	0.47973	0.625	0.77027	0.023649	0.182432	0.5	0.746622	0.989865	0.459459	0.508475	0.010135	0.280405	0.570946	0.760135	0.986486	0.320946
0.36129	0.383871	0.254839	0.275081	0.168285	0.203883	0.006452	0.23871	0.483871	0.735484	1	0.009677	0.229032	0.493548	0.770968	0.990323	0.003226	0.251613	0.496774	0.712903	0.993548	0.651613	0.077419	0.270968	0.032362	0.090615	0	0.003226	0.241935	0.522581	0.741935	1	0.248387	0.264516	0.674194	0.83871	0.993548	0.022581	0.209677	0.332258	0.709677	0.909677	0.309677	0.355987	0.009677	0.174194	0.448387	0.696774	0.993548	0.393548
0.376605	0.356633	0.266762	0.27	0.215714	0.174286	0.005706	0.268188	0.520685	0.761769	0.99572	0.002853	0.201141	0.445078	0.740371	1	0.001427	0.339515	0.536377	0.743224	0.998573	0.620542	0.135521	0.243937	0.065714	0.057143	0.005714	0.001427	0.225392	0.472183	0.733238	1	0.039943	0.373752	0.579173	0.825963	0.951498	0.054208	0.360913	0.529244	0.774608	0.998573	0.422254	0.402857	0.007133	0.266762	0.479315	0.699001	0.994294	0.39515
0.357895	0.315789	0.326316	0.276596	0.180851	0.191489	0.031579	0.221053	0.473684	0.747368	1	0.042105	0.136842	0.4	0.642105	0.989474	0.010526	0.326316	0.547368	0.831579	0.968421	0.6	0.031579	0.368421	0.042553	0.085106	0	0.010526	0.221053	0.368421	0.631579	1	0.421053	0.421053	0.421053	0.431579	0.621053	0.136842	0.484211	0.736842	0.831579	0.936842	0.347368	0.382979	0.157895	0.473684	0.631579	0.831579	0.957895	0.336842
0.351598	0.410959	0.237443	0.284404	0.169725	0.155963	0.027397	0.237443	0.479452	0.721461	1	0.009132	0.242009	0.56621	0.780822	0.990868	0.004566	0.26484	0.474886	0.643836	0.876712	0.447489	0.077626	0.474886	0.045872	0.073394	0	0.004566	0.287671	0.561644	0.780822	1	0.045662	0.639269	0.666667	0.694064	0.744292	0.086758	0.219178	0.401826	0.60274	0.917808	0.420091	0.40367	0.050228	0.269406	0.520548	0.675799	0.90411	0.369863
0.392593	0.325926	0.281481	0.268657	0.238806	0.19403	0.014815	0.162963	0.37037	0.666667	0.992593	0.02963	0.348148	0.6	0.844444	0.977778	0.007407	0.259259	0.533333	0.733333	1	0.348148	0.2	0.451852	0.074627	0.074627	0	0.007407	0.140741	0.451852	0.77037	1	0.318519	0.355556	0.42963	0.511111	0.866667	0.037037	0.192593	0.57037	0.725926	0.962963	0.42963	0.298507	0.022222	0.340741	0.503704	0.8	0.985185	0.340741
0.422018	0.192661	0.385321	0.12963	0.305556	0.148148	0.018349	0.165138	0.449541	0.642202	1	0.174312	0.348624	0.431193	0.697248	0.899083	0.009174	0.247706	0.577982	0.770642	0.990826	0.385321	0.174312	0.440367	0.046296	0.064815	0.009259	0.009174	0.091743	0.330275	0.724771	1	0.247706	0.275229	0.385321	0.431193	0.779817	0.100917	0.477064	0.587156	0.87156	0.981651	0.477064	0.37037	0.06422	0.376147	0.541284	0.752294	0.990826	0.165138
0.41791	0.313433	0.268657	0.263158	0.218045	0.180451	0.037313	0.261194	0.514925	0.813433	0.985075	0.022388	0.201493	0.462687	0.701493	1	0.007463	0.216418	0.477612	0.69403	0.992537	0.402985	0.268657	0.328358	0.135338	0.075188	0.015038	0.007463	0.298507	0.514925	0.686567	1	0.19403	0.373134	0.5	0.656716	0.985075	0.044776	0.141791	0.268657	0.850746	0.932836	0.335821	0.421053	0.104478	0.313433	0.5	0.69403	0.895522	0.30597
0.30084	0.431933	0.267227	0.208754	0.171717	0.239057	0.003361	0.193277	0.411765	0.69916	0.991597	0.005042	0.315966	0.584874	0.828571	0.998319	0.001681	0.231933	0.445378	0.721008	1	0.531092	0.2	0.268908	0.089226	0.055556	0.001684	0.001681	0.242017	0.559664	0.709244	1	0.05042	0.215126	0.388235	0.630252	0.986555	0.028571	0.321008	0.52437	0.852101	0.963025	0.563025	0.350168	0.018487	0.305882	0.584874	0.764706	0.993277	0.411765
0.331801	0.444853	0.223346	0.285189	0.160074	0.181233	0.004596	0.241728	0.528493	0.761029	0.999081	0.001838	0.215993	0.442096	0.770221	1	0.000919	0.335478	0.536765	0.694853	0.996324	0.670037	0.098346	0.231618	0.041398	0.061638	0.00276	0.000919	0.206801	0.443015	0.807904	1	0.025735	0.471507	0.591912	0.690257	0.992647	0.073529	0.272978	0.485294	0.639706	0.988051	0.451287	0.342226	0.011029	0.390625	0.564338	0.767463	0.996324	0.434743
0.318072	0.433735	0.248193	0.2657	0.169082	0.214976	0.004819	0.214458	0.481928	0.725301	0.990361	0.007229	0.260241	0.515663	0.785542	1	0.00241	0.26988	0.520482	0.718072	0.992771	0.583133	0.151807	0.26506	0.067633	0.082126	0	0.00241	0.286747	0.549398	0.8	1	0.115663	0.298795	0.46988	0.648193	0.763855	0.007229	0.091566	0.486747	0.718072	0.987952	0.46506	0.381643	0.007229	0.296386	0.583133	0.792771	0.995181	0.428916
0.354108	0.458924	0.186969	0.292614	0.116477	0.198864	0.008499	0.215297	0.371105	0.674221	0.988669	0.005666	0.294618	0.543909	0.78187	1	0.002833	0.303116	0.498584	0.747875	0.997167	0.866856	0.036827	0.096317	0.019886	0.03125	0.014205	0.002833	0.252125	0.535411	0.776204	1	0.016997	0.022663	0.076487	0.345609	0.86119	0.067989	0.25779	0.29745	0.354108	0.569405	0.31728	0.323864	0.014164	0.314448	0.518414	0.756374	0.983003	0.444759
0.385827	0.333071	0.281102	0.257683	0.22695	0.193065	0.007087	0.251181	0.491339	0.740157	1	0.001575	0.233071	0.514961	0.751969	0.998425	0.000787	0.258268	0.500787	0.751181	0.99685	0.414173	0.192126	0.393701	0.081166	0.08747	0.00394	0.000787	0.229921	0.520472	0.774803	1	0.00315	0.211024	0.43622	0.689764	0.969291	0.007087	0.284252	0.508661	0.755906	0.985039	0.414961	0.49015	0.00315	0.252756	0.50315	0.759843	0.99685	0.351969
0.354571	0.385042	0.260388	0.266667	0.188889	0.208333	0.00831	0.299169	0.493075	0.736842	0.980609	0.00554	0.213296	0.501385	0.783934	1	0.00277	0.279778	0.495845	0.706371	0.98338	0.542936	0.290859	0.166205	0.088889	0.044444	0.005556	0.00277	0.177285	0.576177	0.792244	1	0.116343	0.238227	0.457064	0.747922	0.927978	0.310249	0.362881	0.493075	0.598338	0.980609	0.531856	0.311111	0.01108	0.240997	0.531856	0.745152	0.98892	0.398892
0.364764	0.291563	0.343672	0.231056	0.265839	0.206211	0.008685	0.272953	0.524814	0.76799	0.996278	0.007444	0.229529	0.473945	0.738213	0.993797	0.001241	0.234491	0.490074	0.745658	1	0.483871	0.225806	0.290323	0.098137	0.053416	0.001242	0.001241	0.208437	0.452854	0.735732	1	0.004963	0.186104	0.431762	0.815136	0.96402	0.008685	0.333747	0.555831	0.709677	0.995037	0.575682	0.402484	0.002481	0.263027	0.48139	0.744417	0.996278	0.291563
0.298544	0.368932	0.332524	0.211679	0.182482	0.279805	0.004854	0.303398	0.546117	0.791262	0.985437	0.01699	0.203883	0.468447	0.701456	0.995146	0.002427	0.245146	0.48301	0.757282	1	0.368932	0.133495	0.497573	0.075426	0.099757	0.007299	0.002427	0.203883	0.541262	0.813107	1	0.038835	0.157767	0.507282	0.919903	0.997573	0.007282	0.257282	0.458738	0.696602	0.949029	0.584951	0.389294	0.009709	0.254854	0.463592	0.696602	0.997573	0.373786
0.382576	0.511364	0.106061	0.353612	0.095057	0.091255	0.015152	0.223485	0.575758	0.768939	0.996212	0.011364	0.253788	0.435606	0.69697	1	0.003788	0.227273	0.632576	0.715909	0.988636	0.931818	0.011364	0.056818	0.015209	0.015209	0	0.003788	0.231061	0.473485	0.734848	1	0.32197	0.32197	0.32197	0.325758	0.67803	0.704545	0.712121	0.727273	0.761364	0.776515	0.147727	0.205323	0.087121	0.594697	0.712121	0.859848	0.988636	0.492424
0.37218	0.319549	0.308271	0.218868	0.230189	0.211321	0.007519	0.229323	0.522556	0.815789	1	0.011278	0.266917	0.484962	0.62406	0.996241	0.003759	0.18797	0.530075	0.75188	0.954887	0.552632	0.342105	0.105263	0.10566	0.015094	0	0.003759	0.285714	0.515038	0.721805	1	0.011278	0.131579	0.37218	0.676692	0.883459	0.236842	0.259398	0.928571	0.954887	0.981203	0.518797	0.354717	0.011278	0.24812	0.533835	0.714286	0.966165	0.330827
0.419872	0.423077	0.157051	0.392283	0.151125	0.07717	0.012821	0.25641	0.535256	0.766026	1	0.00641	0.285256	0.516026	0.798077	0.99359	0.003205	0.108974	0.298077	0.544872	0.977564	0.685897	0.169872	0.144231	0.064309	0.032154	0	0.003205	0.317308	0.641026	0.820513	1	0.012821	0.125	0.224359	0.519231	0.964744	0.051282	0.147436	0.458333	0.564103	0.785256	0.358974	0.302251	0.009615	0.169872	0.320513	0.509615	0.977564	0.474359
0.36	0.36	0.28	0.28125	0.209821	0.196429	0.008889	0.248889	0.457778	0.751111	0.995556	0.044444	0.32	0.551111	0.742222	1	0.004444	0.173333	0.417778	0.72	0.951111	0.4	0.217778	0.382222	0.066964	0.058036	0.004464	0.004444	0.333333	0.671111	0.888889	1	0.137778	0.204444	0.373333	0.773333	0.866667	0.017778	0.106667	0.426667	0.524444	0.973333	0.462222	0.428571	0.026667	0.24	0.493333	0.68	0.862222	0.36
0.378641	0.300971	0.320388	0.196078	0.254902	0.186275	0.048544	0.213592	0.446602	0.669903	0.990291	0.058252	0.262136	0.495146	0.815534	1	0.009709	0.15534	0.466019	0.68932	0.941748	0.378641	0.417476	0.203883	0.137255	0.039216	0	0.009709	0.242718	0.427184	0.815534	1	0.019417	0.281553	0.621359	0.776699	0.941748	0.145631	0.184466	0.446602	0.495146	0.553398	0.485437	0.372549	0.019417	0.291262	0.592233	0.776699	0.951456	0.252427
0.335165	0.412088	0.252747	0.331492	0.165746	0.20442	0.027473	0.192308	0.423077	0.664835	0.994505	0.016484	0.291209	0.587912	0.840659	1	0.005495	0.225275	0.456044	0.631868	0.989011	0.587912	0.175824	0.236264	0.077348	0.044199	0	0.005495	0.208791	0.483516	0.807692	1	0.043956	0.357143	0.516484	0.576923	0.747253	0.17033	0.258242	0.318681	0.67033	0.912088	0.423077	0.375691	0.049451	0.258242	0.412088	0.593407	0.972527	0.417582
0.39759	0.361446	0.240964	0.304878	0.170732	0.231707	0.048193	0.253012	0.506024	0.710843	1	0.024096	0.180723	0.421687	0.662651	0.987952	0.012048	0.301205	0.481928	0.795181	0.975904	0.554217	0.120482	0.325301	0.073171	0.04878	0	0.012048	0.13253	0.373494	0.626506	1	0.180723	0.192771	0.313253	0.337349	0.566265	0.39759	0.457831	0.722892	0.807229	0.891566	0.349398	0.365854	0.192771	0.39759	0.566265	0.795181	0.927711	0.385542
0.184783	0.361413	0.453804	0.144414	0.138965	0.343324	0.005435	0.182065	0.4375	0.69837	0.991848	0.027174	0.222826	0.470109	0.720109	1	0.002717	0.290761	0.527174	0.755435	0.994565	0.32337	0.054348	0.622283	0.032698	0.059946	0.016349	0.002717	0.122283	0.214674	0.638587	1	0.021739	0.097826	0.171196	0.633152	0.660326	0.01087	0.377717	0.570652	0.807065	0.994565	0.722826	0.179837	0.008152	0.290761	0.497283	0.744565	0.994565	0.342391
0.336735	0.341837	0.321429	0.219949	0.217391	0.235294	0.010204	0.265306	0.522959	0.765306	1	0.005102	0.227041	0.482143	0.757653	0.989796	0.002551	0.237245	0.492347	0.706633	0.997449	0.535714	0.135204	0.329082	0.069054	0.084399	0.002558	0.002551	0.214286	0.410714	0.744898	1	0.043367	0.163265	0.283163	0.716837	0.918367	0.119898	0.431122	0.586735	0.778061	0.984694	0.59949	0.352941	0.007653	0.237245	0.510204	0.729592	0.984694	0.34949
0.28022	0.470696	0.249084	0.229358	0.152294	0.214679	0.003663	0.208791	0.443223	0.695971	0.994505	0.005495	0.283883	0.582418	0.794872	0.998168	0.001832	0.234432	0.412088	0.68315	1	0.716117	0.159341	0.124542	0.06789	0.049541	0.009174	0.001832	0.28022	0.580586	0.79304	1	0.084249	0.300366	0.404762	0.628205	0.994505	0.069597	0.130037	0.214286	0.351648	0.996337	0.408425	0.388991	0.025641	0.225275	0.388278	0.68315	0.996337	0.492674
0.182482	0.489051	0.328467	0.169118	0.095588	0.294118	0.014599	0.087591	0.372263	0.708029	0.992701	0.072993	0.240876	0.540146	0.759124	1	0.007299	0.321168	0.489051	0.642336	0.970803	0.781022	0.087591	0.131387	0.058824	0.029412	0	0.007299	0.189781	0.576642	0.788321	1	0.19708	0.211679	0.335766	0.635036	0.912409	0.255474	0.459854	0.49635	0.525547	0.562044	0.467153	0.264706	0.036496	0.343066	0.518248	0.686131	0.970803	0.569343
0.296875	0.375	0.328125	0.188235	0.2	0.27451	0.007812	0.164062	0.457031	0.773438	1	0.023438	0.324219	0.535156	0.71875	0.992188	0.003906	0.242188	0.472656	0.742188	0.988281	0.371094	0.222656	0.40625	0.094118	0.078431	0	0.003906	0.277344	0.488281	0.707031	1	0.007812	0.199219	0.492188	0.667969	0.894531	0.023438	0.238281	0.597656	0.824219	0.988281	0.644531	0.352941	0.011719	0.289062	0.496094	0.699219	0.988281	0.371094
0.320388	0.368932	0.31068	0.284314	0.186275	0.264706	0.029126	0.184466	0.485437	0.68932	0.941748	0.019417	0.281553	0.456311	0.737864	0.980583	0.009709	0.271845	0.524272	0.718447	1	0.252427	0.174757	0.572816	0.058824	0.078431	0	0.009709	0.281553	0.456311	0.621359	1	0.300971	0.330097	0.427184	0.495146	0.543689	0.058252	0.184466	0.640777	0.786408	0.932039	0.446602	0.529412	0.058252	0.262136	0.436893	0.699029	0.961165	0.417476
0.319088	0.378917	0.301994	0.234286	0.171429	0.217143	0.008547	0.190883	0.37037	0.603989	0.985755	0.005698	0.207977	0.461538	0.683761	0.997151	0.002849	0.396011	0.717949	0.837607	1	0.509972	0.139601	0.350427	0.048571	0.054286	0.014286	0.002849	0.168091	0.373219	0.524217	1	0.153846	0.307692	0.404558	0.706553	0.991453	0.074074	0.549858	0.760684	0.849003	0.985755	0.447293	0.388571	0.048433	0.310541	0.655271	0.826211	0.991453	0.344729
0.268657	0.38806	0.343284	0.180451	0.157895	0.330827	0.059701	0.216418	0.440299	0.708955	1	0.029851	0.313433	0.529851	0.783582	0.992537	0.007463	0.201493	0.462687	0.738806	0.985075	0.335821	0.223881	0.440299	0.075188	0.090226	0	0.007463	0.320896	0.537313	0.783582	1	0.014925	0.604478	0.828358	0.910448	0.970149	0.067164	0.19403	0.350746	0.462687	0.768657	0.574627	0.330827	0.014925	0.246269	0.477612	0.716418	0.970149	0.425373
0.197128	0.390339	0.412533	0.135948	0.130719	0.34902	0.002611	0.167102	0.477807	0.711488	0.992167	0.005222	0.258486	0.486945	0.745431	1	0.001305	0.272846	0.522193	0.761097	0.997389	0.348564	0.079634	0.571802	0.037908	0.071895	0.00915	0.001305	0.174935	0.463446	0.781984	1	0.009138	0.13577	0.370757	0.789817	0.992167	0.075718	0.292428	0.539164	0.72846	0.951697	0.751958	0.19085	0.009138	0.284595	0.522193	0.746736	0.998695	0.381201
0.175824	0.3663	0.457875	0.113971	0.147059	0.3125	0.021978	0.234432	0.575092	0.750916	1	0.010989	0.249084	0.509158	0.776557	0.992674	0.003663	0.252747	0.468864	0.736264	0.996337	0.205128	0	0.794872	0	0.073529	0	0.003663	0.186813	0.494505	0.809524	1	0	0	0	0	0	0.010989	0.271062	0.509158	0.728938	0.981685	0.732601	0.183824	0.032967	0.315018	0.527473	0.74359	0.981685	0.347985
0.440789	0.322368	0.236842	0.264901	0.245033	0.119205	0.013158	0.230263	0.473684	0.763158	1	0.026316	0.236842	0.486842	0.657895	0.993421	0.006579	0.25	0.5	0.703947	0.973684	0.559211	0.151316	0.289474	0.046358	0.072848	0.006623	0.006579	0.203947	0.467105	0.756579	1	0.039474	0.118421	0.230263	0.269737	0.605263	0.223684	0.447368	0.671053	0.894737	0.967105	0.361842	0.357616	0.046053	0.236842	0.447368	0.664474	0.960526	0.302632
0.321888	0.381974	0.296137	0.219828	0.181034	0.228448	0.012876	0.180258	0.437768	0.751073	1	0.008584	0.240343	0.446352	0.72103	0.991416	0.004292	0.347639	0.600858	0.763948	0.987124	0.377682	0	0.622318	0	0.086207	0	0.004292	0.150215	0.266094	0.48927	1	0	0	0	0	0	0.021459	0.429185	0.626609	0.7897	0.991416	0.493562	0.327586	0.021459	0.386266	0.609442	0.802575	0.991416	0.390558
0.327778	0.361111	0.311111	0.26257	0.206704	0.206704	0.022222	0.177778	0.466667	0.722222	0.994444	0.011111	0.216667	0.472222	0.7	0.972222	0.005556	0.311111	0.538889	0.788889	1	0.488889	0.483333	0.027778	0.150838	0.005587	0.005587	0.005556	0.166667	0.477778	0.727778	1	0.083333	0.327778	0.555556	0.788889	0.994444	0.283333	0.283333	0.288889	0.294444	0.305556	0.477778	0.324022	0.083333	0.3	0.494444	0.772222	0.983333	0.377778
0.194805	0.220779	0.584416	0.078947	0.210526	0.236842	0.051948	0.103896	0.61039	0.805195	0.987013	0.116883	0.532468	0.675325	0.792208	0.922078	0.012987	0.220779	0.363636	0.571429	1	0.25974	0.168831	0.571429	0.039474	0.065789	0.013158	0.012987	0.597403	0.662338	0.896104	1	0.74026	0.766234	0.805195	0.844156	0.974026	0.038961	0.194805	0.337662	0.480519	0.727273	0.584416	0.342105	0.025974	0.376623	0.558442	0.753247	0.974026	0.233766
0.351047	0.323671	0.325282	0.193548	0.232258	0.241935	0.008052	0.2657	0.515298	0.748792	0.996779	0.003221	0.21095	0.457327	0.718196	0.99839	0.00161	0.26248	0.52496	0.753623	1	0.454106	0.165862	0.380032	0.059677	0.072581	0.001613	0.00161	0.249597	0.457327	0.708535	1	0.008052	0.214171	0.426731	0.73913	0.922705	0.027375	0.251208	0.568438	0.835749	0.995169	0.52496	0.383871	0.009662	0.230274	0.518519	0.768116	0.991948	0.342995
0.366667	0.348611	0.284722	0.240612	0.21975	0.215577	0.005556	0.291667	0.577778	0.804167	1	0.002778	0.227778	0.481944	0.75	0.988889	0.001389	0.230556	0.456944	0.670833	0.993056	0.418056	0.223611	0.358333	0.080668	0.058414	0.008345	0.001389	0.261111	0.573611	0.751389	1	0.011111	0.158333	0.320833	0.623611	0.993056	0.075	0.334722	0.4875	0.8	0.906944	0.475	0.378303	0.009722	0.209722	0.427778	0.648611	0.993056	0.369444
0.40146	0.273723	0.324818	0.241758	0.230769	0.18315	0.007299	0.248175	0.489051	0.777372	1	0.014599	0.215328	0.525547	0.70073	0.99635	0.00365	0.262774	0.478102	0.726277	0.992701	0.255474	0.218978	0.525547	0.054945	0.084249	0.010989	0.00365	0.244526	0.485401	0.682482	1	0.211679	0.270073	0.551095	0.894161	0.992701	0.018248	0.167883	0.448905	0.759124	0.945255	0.510949	0.446886	0.010949	0.273723	0.510949	0.693431	0.992701	0.284672
0.515152	0.225108	0.25974	0.235549	0.320809	0.096821	0.002886	0.261183	0.502165	0.743146	1	0.004329	0.232323	0.468975	0.777778	0.998557	0.001443	0.238095	0.505051	0.728716	0.992785	0.069264	0	0.930736	0	0.011561	0	0.001443	0.017316	0.914863	0.936508	1	0	0	0	0	0	0.018759	0.249639	0.481962	0.714286	0.992785	0.264069	0.479769	0.005772	0.238095	0.484848	0.776335	0.992785	0.219336
0.491124	0.272189	0.236686	0.303571	0.238095	0.125	0.029586	0.260355	0.508876	0.727811	1	0.011834	0.201183	0.449704	0.745562	0.988166	0.005917	0.242604	0.455621	0.804734	0.976331	0.331361	0.023669	0.64497	0.047619	0.083333	0	0.005917	0.230769	0.633136	0.846154	1	0.153846	0.153846	0.366864	0.668639	0.881657	0.029586	0.272189	0.485207	0.698225	0.952663	0.420118	0.5	0.011834	0.224852	0.431953	0.704142	0.976331	0.331361
0.303111	0.359111	0.337778	0.219751	0.200178	0.255338	0.004444	0.251556	0.491556	0.736	0.999111	0.001778	0.261333	0.500444	0.747556	0.997333	0.000889	0.233778	0.505778	0.759111	1	0.466667	0.168	0.365333	0.065836	0.065836	0	0.000889	0.257778	0.482667	0.704889	1	0.032889	0.24	0.524444	0.851556	0.968889	0.002667	0.225778	0.543111	0.763556	0.988444	0.577778	0.338078	0.003556	0.224889	0.470222	0.748444	0.996444	0.387556
0.3	0.42	0.28	0.236948	0.200803	0.180723	0.012	0.292	0.532	0.8	1	0.008	0.14	0.42	0.74	0.996	0.004	0.324	0.54	0.724	0.976	0.576	0.332	0.092	0.136546	0.040161	0	0.004	0.18	0.5	0.752	1	0.232	0.38	0.556	0.764	0.976	0.012	0.028	0.328	0.692	0.868	0.544	0.345382	0.02	0.38	0.588	0.776	0.992	0.432
0.127059	0.381176	0.491765	0.09434	0.115566	0.353774	0.084706	0.209412	0.487059	0.778824	1	0.004706	0.254118	0.432941	0.665882	0.988235	0.002353	0.24	0.529412	0.774118	0.997647	0.176471	0.018824	0.804706	0.002358	0.082547	0.007075	0.002353	0.256471	0.472941	0.731765	1	0.835294	0.842353	0.847059	0.851765	0.856471	0.004706	0.237647	0.498824	0.734118	0.995294	0.814118	0.183962	0.007059	0.256471	0.515294	0.764706	0.990588	0.392941
0.32747	0.391069	0.281461	0.249322	0.173442	0.204607	0.009472	0.248985	0.487145	0.733424	0.99594	0.002706	0.225981	0.477673	0.760487	1	0.001353	0.271989	0.533153	0.742896	0.997294	0.456022	0.20839	0.335589	0.093496	0.077236	0.009485	0.001353	0.200271	0.466847	0.753721	1	0.096076	0.47226	0.62111	0.768606	0.979702	0.00406	0.213802	0.403248	0.64682	0.994587	0.534506	0.360434	0.00406	0.305819	0.571042	0.784844	0.994587	0.435724
0.271186	0.418079	0.310734	0.220963	0.15864	0.252125	0.008475	0.257062	0.522599	0.757062	0.991525	0.00565	0.223164	0.443503	0.683616	1	0.002825	0.251412	0.567797	0.805085	0.983051	0.516949	0.242938	0.240113	0.127479	0.053824	0.008499	0.002825	0.228814	0.502825	0.751412	1	0.166667	0.299435	0.415254	0.618644	0.977401	0.016949	0.135593	0.59322	0.884181	0.985876	0.545198	0.385269	0.014124	0.268362	0.474576	0.686441	0.974576	0.384181
0.354167	0.335938	0.309896	0.232376	0.240209	0.206266	0.023438	0.315104	0.567708	0.802083	1	0.005208	0.205729	0.424479	0.6875	0.989583	0.002604	0.213542	0.5	0.729167	0.997396	0.359375	0.117188	0.523438	0.046997	0.088773	0	0.002604	0.247396	0.479167	0.804688	1	0.007812	0.088542	0.195312	0.825521	0.997396	0.041667	0.309896	0.552083	0.723958	0.955729	0.583333	0.381201	0.007812	0.190104	0.424479	0.710938	0.997396	0.325521
0.433526	0.225434	0.34104	0.203488	0.348837	0.133721	0.011561	0.254335	0.526012	0.768786	1	0.034682	0.317919	0.473988	0.716763	0.988439	0.00578	0.179191	0.410405	0.676301	0.99422	0.260116	0.132948	0.606936	0.05814	0.05814	0	0.00578	0.32948	0.462428	0.82659	1	0.346821	0.369942	0.439306	0.855491	0.890173	0.034682	0.179191	0.49711	0.65896	0.971098	0.468208	0.453488	0.017341	0.225434	0.473988	0.67052	0.959538	0.213873
0.213953	0.446512	0.339535	0.224299	0.130841	0.313084	0.013953	0.186047	0.446512	0.674419	0.986047	0.018605	0.311628	0.562791	0.790698	1	0.004651	0.204651	0.47907	0.697674	0.972093	0.539535	0.218605	0.24186	0.074766	0.056075	0.037383	0.004651	0.232558	0.423256	0.72093	1	0.027907	0.204651	0.27907	0.544186	0.930233	0.106977	0.6	0.739535	0.8	0.976744	0.762791	0.196262	0.018605	0.237209	0.506977	0.711628	0.972093	0.47907
0.310881	0.295337	0.393782	0.151042	0.244792	0.255208	0.010363	0.316062	0.585492	0.823834	0.968912	0.036269	0.165803	0.398964	0.632124	0.989637	0.005181	0.212435	0.492228	0.746114	1	0.367876	0.222798	0.409326	0.09375	0.0625	0.010417	0.005181	0.295337	0.430052	0.725389	1	0.020725	0.336788	0.689119	0.787565	0.875648	0.041451	0.212435	0.481865	0.606218	0.989637	0.637306	0.354167	0.020725	0.19171	0.414508	0.689119	0.984456	0.300518
0.256637	0.336283	0.40708	0.178571	0.151786	0.285714	0.061947	0.460177	0.681416	0.80531	1	0.017699	0.212389	0.39823	0.610619	0.982301	0.00885	0.141593	0.433628	0.761062	0.99115	0.477876	0.035398	0.486726	0.026786	0.116071	0.008929	0.00885	0.40708	0.59292	0.707965	1	0.433628	0.433628	0.442478	0.451327	0.840708	0.017699	0.123894	0.327434	0.761062	0.982301	0.477876	0.25	0.026549	0.132743	0.318584	0.451327	0.99115	0.389381
0.322464	0.405797	0.271739	0.28	0.2	0.218182	0.021739	0.231884	0.442029	0.73913	0.992754	0.007246	0.23913	0.503623	0.728261	1	0.003623	0.311594	0.532609	0.789855	0.98913	0.221014	0.094203	0.684783	0.029091	0.065455	0	0.003623	0.242754	0.496377	0.623188	1	0.01087	0.492754	0.536232	0.572464	0.597826	0.028986	0.228261	0.431159	0.797101	0.98913	0.481884	0.472727	0.018116	0.275362	0.536232	0.778986	0.98913	0.481884
0.307891	0.369987	0.322122	0.202073	0.21114	0.23057	0.003881	0.219922	0.517464	0.723157	1	0.002587	0.254851	0.477361	0.737387	0.998706	0.001294	0.260026	0.530401	0.783959	0.996119	0.435964	0.141009	0.423027	0.062176	0.07772	0.005181	0.001294	0.209573	0.450194	0.668823	1	0.025873	0.152652	0.272962	0.804657	0.993532	0.032342	0.380336	0.619664	0.746442	0.979301	0.611902	0.34456	0.005175	0.27555	0.48771	0.76326	0.996119	0.388098
0.238806	0.467662	0.293532	0.16	0.165	0.29	0.024876	0.323383	0.467662	0.721393	1	0.014925	0.233831	0.577114	0.756219	0.995025	0.004975	0.174129	0.383085	0.726368	0.985075	0.457711	0.393035	0.149254	0.115	0.025	0.005	0.004975	0.422886	0.567164	0.79602	1	0.174129	0.293532	0.472637	0.776119	0.995025	0.014925	0.044776	0.084577	0.124378	0.631841	0.542289	0.42	0.0199	0.164179	0.40796	0.711443	0.995025	0.502488
0.187713	0.351536	0.460751	0.133562	0.150685	0.35274	0.006826	0.225256	0.515358	0.774744	1	0.020478	0.242321	0.464164	0.723549	0.993174	0.003413	0.238908	0.494881	0.761092	0.986348	0.201365	0.023891	0.774744	0.013699	0.082192	0	0.003413	0.174061	0.464164	0.648464	1	0.1843	0.1843	0.808874	0.8157	0.822526	0.013652	0.262799	0.491468	0.750853	0.986348	0.778157	0.212329	0.040956	0.279863	0.494881	0.750853	0.979522	0.327645
0.422807	0.268421	0.308772	0.233743	0.282953	0.168717	0.003509	0.250877	0.515789	0.736842	0.994737	0.005263	0.264912	0.496491	0.798246	1	0.001754	0.221053	0.468421	0.715789	0.998246	0.150877	0.003509	0.845614	0.003515	0.070299	0	0.001754	0.175439	0.44386	0.775439	1	0.6	0.6	0.6	0.6	0.601754	0.005263	0.249123	0.505263	0.742105	0.989474	0.378947	0.520211	0.005263	0.270175	0.526316	0.785965	0.987719	0.270175
0.282175	0.36958	0.348245	0.203857	0.215565	0.258953	0.003441	0.251893	0.483138	0.746043	1	0.002753	0.277357	0.523056	0.761872	0.999312	0.000688	0.227805	0.489332	0.732966	0.995182	0.695802	0.189952	0.114246	0.100551	0.035813	0	0.000688	0.243634	0.509979	0.750172	1	0.016518	0.253269	0.47488	0.728837	0.994494	0.05437	0.276669	0.500344	0.740537	0.977977	0.631796	0.413223	0.002065	0.244322	0.486579	0.745354	0.995182	0.461115
0.377483	0.274834	0.347682	0.245847	0.255814	0.199336	0.006623	0.288079	0.516556	0.791391	1	0.009934	0.215232	0.536424	0.698675	0.980132	0.003311	0.228477	0.440397	0.715232	0.996689	0.44702	0.231788	0.321192	0.099668	0.053156	0	0.003311	0.231788	0.52649	0.721854	1	0.013245	0.082781	0.221854	0.380795	0.715232	0.304636	0.437086	0.761589	0.907285	0.990066	0.519868	0.398671	0.009934	0.245033	0.44702	0.675497	0.943709	0.274834
0.323877	0.373522	0.3026	0.241706	0.194313	0.234597	0.007092	0.245863	0.48227	0.770686	0.990544	0.01182	0.217494	0.475177	0.72104	1	0.002364	0.27896	0.522459	0.763593	0.995272	0.413712	0.158392	0.427896	0.07346	0.078199	0.007109	0.002364	0.250591	0.444444	0.661939	1	0.080378	0.27896	0.486998	0.680851	0.947991	0.028369	0.238771	0.55792	0.79669	0.997636	0.65721	0.312796	0.004728	0.286052	0.515366	0.723404	0.995272	0.375887
0.255474	0.430657	0.313869	0.183824	0.213235	0.264706	0.014599	0.328467	0.554745	0.80292	0.992701	0.043796	0.29927	0.532847	0.759124	1	0.007299	0.124088	0.306569	0.620438	0.985401	0.394161	0.131387	0.474453	0.044118	0.088235	0.029412	0.007299	0.350365	0.547445	0.824818	1	0.029197	0.058394	0.313869	0.408759	0.452555	0.021898	0.182482	0.576642	0.744526	0.948905	0.554745	0.455882	0.021898	0.167883	0.40146	0.671533	0.985401	0.459854
0.299479	0.361979	0.338542	0.16188	0.240209	0.253264	0.018229	0.231771	0.544271	0.721354	0.994792	0.005208	0.247396	0.442708	0.692708	1	0.002604	0.255208	0.513021	0.796875	0.997396	0.476562	0.138021	0.385417	0.062663	0.083551	0	0.002604	0.317708	0.513021	0.809896	1	0.192708	0.463542	0.653646	0.802083	0.994792	0.007812	0.135417	0.390625	0.635417	0.851562	0.520833	0.375979	0.007812	0.325521	0.502604	0.747396	0.989583	0.385417
0.334262	0.370474	0.295265	0.249651	0.205021	0.223152	0.004178	0.268802	0.504178	0.777159	0.995822	0.002786	0.220056	0.509749	0.740947	1	0.001393	0.254875	0.481894	0.738162	0.997214	0.306407	0.108635	0.584958	0.04742	0.09205	0.002789	0.001393	0.192201	0.399721	0.689415	1	0.005571	0.153203	0.245125	0.339833	0.954039	0.020891	0.384401	0.600279	0.811978	0.995822	0.537604	0.412831	0.005571	0.263231	0.5	0.715877	0.997214	0.410864
0.363636	0.295455	0.340909	0.191781	0.255708	0.200913	0.009091	0.218182	0.45	0.75	0.995455	0.031818	0.313636	0.545455	0.731818	0.972727	0.004545	0.222727	0.468182	0.722727	1	0.477273	0.340909	0.181818	0.146119	0.027397	0.009132	0.004545	0.4	0.531818	0.759091	1	0.009091	0.309091	0.65	0.813636	0.968182	0.040909	0.127273	0.240909	0.286364	0.381818	0.568182	0.310502	0.013636	0.259091	0.568182	0.718182	0.972727	0.3
0.296984	0.348028	0.354988	0.186047	0.213953	0.248837	0.00464	0.2529	0.512761	0.758701	0.99536	0.006961	0.194896	0.522042	0.74478	1	0.00232	0.269142	0.477958	0.730858	0.979118	0.389791	0.097448	0.512761	0.04186	0.097674	0.013953	0.00232	0.171694	0.438515	0.714617	1	0.12529	0.392111	0.433875	0.640371	0.979118	0.009281	0.266821	0.522042	0.75174	0.944316	0.561485	0.35814	0.016241	0.2529	0.475638	0.719258	0.990719	0.37587
0.409357	0.19883	0.391813	0.2	0.305882	0.141176	0.02924	0.397661	0.584795	0.795322	0.994152	0.052632	0.157895	0.368421	0.619883	0.935673	0.005848	0.140351	0.362573	0.725146	1	0.111111	0	0.888889	0	0.047059	0	0.005848	0.122807	0.157895	0.912281	1	0	0	0	0	0	0.017544	0.274854	0.497076	0.719298	0.988304	0.502924	0.435294	0.011696	0.169591	0.368421	0.678363	0.976608	0.233918
0.299451	0.346154	0.354396	0.22314	0.217631	0.239669	0.005495	0.271978	0.475275	0.739011	0.983516	0.008242	0.236264	0.497253	0.71978	0.991758	0.002747	0.230769	0.502747	0.763736	1	0.453297	0.332418	0.214286	0.162534	0.063361	0.002755	0.002747	0.233516	0.527473	0.739011	1	0.005495	0.362637	0.576923	0.840659	0.997253	0.063187	0.175824	0.332418	0.549451	0.651099	0.582418	0.413223	0.008242	0.239011	0.475275	0.733516	0.997253	0.365385
0.201102	0.429752	0.369146	0.174033	0.124309	0.337017	0.013774	0.333333	0.625344	0.823691	0.99449	0.00551	0.256198	0.460055	0.760331	1	0.002755	0.179063	0.465565	0.69697	0.988981	0.349862	0.041322	0.608815	0.013812	0.069061	0.008287	0.002755	0.415978	0.730028	0.903581	1	0.269972	0.275482	0.292011	0.426997	0.812672	0.008264	0.170799	0.396694	0.652893	0.988981	0.606061	0.154696	0.013774	0.22314	0.393939	0.688705	0.986226	0.440771
0.339036	0.37014	0.290824	0.252336	0.193146	0.197819	0.006221	0.284603	0.505443	0.729393	0.990669	0.00311	0.248834	0.468118	0.749611	1	0.001555	0.189736	0.496112	0.762053	0.998445	0.51944	0.125972	0.354588	0.063863	0.073209	0.010903	0.001555	0.278383	0.475894	0.758942	1	0.065319	0.437014	0.601866	0.897356	0.998445	0.004666	0.158631	0.505443	0.692068	0.96423	0.469673	0.376947	0.009331	0.208398	0.522551	0.807154	0.998445	0.385692
0.321705	0.368217	0.310078	0.210117	0.194553	0.241245	0.015504	0.22093	0.403101	0.74031	0.968992	0.003876	0.248062	0.5	0.697674	1	0.027132	0.263566	0.534884	0.775194	0.996124	0.44186	0.162791	0.395349	0.062257	0.077821	0	0.003876	0.224806	0.383721	0.635659	1	0.031008	0.348837	0.562016	0.755814	0.926357	0.042636	0.178295	0.658915	0.829457	0.984496	0.51938	0.420233	0.01938	0.321705	0.554264	0.767442	0.988372	0.395349
0.345455	0.336364	0.318182	0.247706	0.146789	0.266055	0.063636	0.209091	0.554545	0.772727	1	0.018182	0.254545	0.409091	0.663636	0.972727	0.009091	0.218182	0.463636	0.781818	0.963636	0.454545	0.227273	0.318182	0.082569	0.045872	0.027523	0.009091	0.109091	0.290909	0.545455	1	0.145455	0.236364	0.772727	0.827273	0.963636	0.409091	0.472727	0.590909	0.709091	0.918182	0.445455	0.513761	0.027273	0.263636	0.481818	0.690909	0.963636	0.318182
0.257669	0.328221	0.41411	0.144615	0.236923	0.298462	0.018405	0.214724	0.490798	0.711656	0.990798	0.006135	0.263804	0.52454	0.739264	0.984663	0.003067	0.217791	0.478528	0.760736	1	0.457055	0.171779	0.371166	0.067692	0.104615	0.018462	0.003067	0.269939	0.46319	0.803681	1	0.138037	0.337423	0.47546	0.760736	0.966258	0.01227	0.171779	0.527607	0.690184	0.993865	0.607362	0.430769	0.01227	0.245399	0.527607	0.754601	0.98773	0.361963
0.306554	0.389006	0.30444	0.213983	0.201271	0.233051	0.004228	0.264271	0.613108	0.813953	0.997886	0.012685	0.249471	0.391121	0.651163	1	0.002114	0.22833	0.522199	0.750529	0.989429	0.475687	0.029598	0.494715	0.012712	0.088983	0.008475	0.002114	0.249471	0.374207	0.606765	1	0.082452	0.086681	0.190275	0.196617	0.828753	0.006342	0.454545	0.632135	0.792812	0.987315	0.513742	0.389831	0.008457	0.196617	0.556025	0.763214	0.993658	0.414376
0.377934	0.326291	0.295775	0.249412	0.24	0.202353	0.004695	0.248826	0.483568	0.7723	0.997653	0.00939	0.265258	0.514085	0.734742	0.99061	0.002347	0.206573	0.481221	0.725352	1	0.359155	0.077465	0.56338	0.035294	0.12	0.007059	0.002347	0.178404	0.319249	0.640845	1	0.053991	0.110329	0.164319	0.225352	0.767606	0.007042	0.413146	0.605634	0.802817	0.995305	0.450704	0.423529	0.007042	0.230047	0.492958	0.680751	0.985915	0.375587
0.342342	0.371943	0.285714	0.239691	0.18299	0.19201	0.003861	0.220077	0.433719	0.72973	0.998713	0.002574	0.261261	0.505792	0.715573	1	0.001287	0.271557	0.555985	0.790219	0.997426	0.534106	0.087516	0.378378	0.039948	0.091495	0.003866	0.001287	0.245817	0.468468	0.741313	1	0.079794	0.204633	0.813385	0.925354	0.992278	0.042471	0.277992	0.499356	0.694981	0.989704	0.500644	0.365979	0.015444	0.320463	0.566281	0.778636	0.994852	0.409266
0.282353	0.388235	0.329412	0.230769	0.213018	0.254438	0.047059	0.370588	0.529412	0.758824	1	0.011765	0.252941	0.494118	0.747059	0.994118	0.005882	0.158824	0.376471	0.723529	0.982353	0.547059	0.311765	0.141176	0.106509	0.023669	0	0.005882	0.335294	0.558824	0.752941	1	0.2	0.317647	0.529412	0.847059	0.988235	0.023529	0.052941	0.088235	0.123529	0.611765	0.488235	0.473373	0.029412	0.152941	0.523529	0.729412	0.994118	0.441176
0.352542	0.311864	0.335593	0.139456	0.231293	0.248299	0.013559	0.271186	0.532203	0.789831	1	0.00678	0.237288	0.474576	0.698305	0.989831	0.00339	0.244068	0.491525	0.752542	0.986441	0.322034	0.267797	0.410169	0.085034	0.085034	0.003401	0.00339	0.176271	0.437288	0.752542	1	0.030508	0.233898	0.511864	0.691525	0.80339	0.061017	0.288136	0.467797	0.864407	0.986441	0.488136	0.387755	0.030508	0.254237	0.457627	0.711864	0.986441	0.311864
0.265734	0.433566	0.300699	0.239437	0.211268	0.316901	0.034965	0.244755	0.440559	0.748252	0.979021	0.013986	0.272727	0.573427	0.734266	1	0.006993	0.20979	0.405594	0.727273	0.986014	0.272727	0.342657	0.384615	0.084507	0.084507	0.014085	0.006993	0.258741	0.426573	0.587413	1	0.020979	0.363636	0.482517	0.643357	0.769231	0.097902	0.181818	0.79021	0.895105	0.993007	0.552448	0.535211	0.027972	0.237762	0.538462	0.762238	0.993007	0.440559
0.275229	0.449541	0.275229	0.267281	0.133641	0.239631	0.009174	0.284404	0.495413	0.788991	1	0.013761	0.233945	0.5	0.738532	0.990826	0.004587	0.243119	0.43578	0.711009	0.986239	0.522936	0.243119	0.233945	0.096774	0.050691	0.004608	0.004587	0.220183	0.504587	0.678899	1	0.055046	0.243119	0.62844	0.784404	0.894495	0.105505	0.279817	0.353211	0.931193	0.990826	0.582569	0.387097	0.013761	0.247706	0.5	0.738532	0.986239	0.5
0.333333	0.296296	0.37037	0.223256	0.223256	0.218605	0.013889	0.314815	0.541667	0.75	0.99537	0.009259	0.268519	0.458333	0.763889	1	0.00463	0.157407	0.453704	0.731481	0.976852	0.393519	0.203704	0.402778	0.069767	0.060465	0.013953	0.00463	0.236111	0.50463	0.671296	1	0.157407	0.462963	0.555556	0.708333	0.888889	0.018519	0.111111	0.314815	0.828704	0.986111	0.532407	0.372093	0.018519	0.222222	0.449074	0.726852	0.976852	0.305556
0.212703	0.395864	0.391433	0.171598	0.133136	0.344675	0.004431	0.322009	0.649926	0.834564	0.998523	0.002954	0.236337	0.500739	0.731167	1	0.001477	0.23486	0.456425	0.6839	0.995569	0.277696	0.04579	0.676514	0.017751	0.06213	0	0.001477	0.249631	0.62777	0.861152	1	0.118168	0.844904	0.883309	0.918759	0.930576	0.025111	0.237814	0.435746	0.664697	0.980798	0.703102	0.239645	0.005908	0.254062	0.472674	0.686854	0.995569	0.375185
0.251282	0.435897	0.312821	0.200514	0.18509	0.275064	0.012821	0.220513	0.446154	0.658974	0.987179	0.005128	0.271795	0.510256	0.792308	1	0.002564	0.246154	0.525641	0.751282	0.997436	0.494872	0.338462	0.166667	0.100257	0.028278	0.002571	0.002564	0.233333	0.5	0.707692	1	0.012821	0.405128	0.65641	0.864103	0.994872	0.007692	0.058974	0.1	0.35641	0.687179	0.651282	0.323907	0.007692	0.330769	0.582051	0.807692	0.994872	0.448718
0.266169	0.442786	0.291045	0.226933	0.177057	0.259352	0.014925	0.233831	0.507463	0.733831	0.987562	0.004975	0.243781	0.477612	0.756219	1	0.002488	0.251244	0.492537	0.726368	0.992537	0.395522	0.19403	0.410448	0.077307	0.092269	0.002494	0.002488	0.221393	0.447761	0.68408	1	0.0199	0.084577	0.236318	0.547264	0.950249	0.161692	0.383085	0.656716	0.781095	0.995025	0.669154	0.319202	0.00995	0.308458	0.524876	0.728856	0.992537	0.457711
0.320119	0.348252	0.331628	0.209382	0.228998	0.232836	0.001279	0.255328	0.507673	0.754476	0.998295	0.000853	0.23231	0.49318	0.746803	1	0.000426	0.26087	0.497016	0.746377	0.997869	0.416454	0.206735	0.376812	0.072068	0.065245	0.007249	0.000426	0.213981	0.500426	0.719523	1	0.008099	0.239557	0.527707	0.71526	0.968457	0.004263	0.276641	0.482523	0.807758	0.997016	0.58994	0.371002	0.00341	0.23913	0.50682	0.761296	0.997869	0.353794
0.318841	0.357488	0.323671	0.218447	0.199029	0.208738	0.009662	0.289855	0.502415	0.73913	0.990338	0.033816	0.222222	0.52657	0.714976	0.985507	0.004831	0.202899	0.463768	0.768116	1	0.584541	0.256039	0.15942	0.101942	0.033981	0.004854	0.004831	0.304348	0.594203	0.816425	1	0.014493	0.21256	0.47343	0.676329	0.966184	0.048309	0.26087	0.347826	0.386473	0.507246	0.502415	0.368932	0.014493	0.241546	0.47343	0.763285	0.985507	0.429952
0.290859	0.396122	0.313019	0.227778	0.175	0.261111	0.00554	0.279778	0.501385	0.722992	1	0.01108	0.207756	0.454294	0.731302	0.99446	0.00277	0.265928	0.542936	0.764543	0.980609	0.443213	0.260388	0.296399	0.105556	0.061111	0	0.00277	0.257618	0.554017	0.750693	1	0.072022	0.271468	0.542936	0.792244	0.99169	0.00831	0.166205	0.373961	0.706371	0.930748	0.614958	0.366667	0.01385	0.240997	0.495845	0.734072	0.99169	0.404432
0.380597	0.317164	0.302239	0.247191	0.273408	0.194757	0.018657	0.220149	0.481343	0.768657	1	0.007463	0.272388	0.507463	0.697761	0.996269	0.003731	0.235075	0.470149	0.723881	0.970149	0.328358	0.257463	0.414179	0.067416	0.052434	0.007491	0.003731	0.264925	0.470149	0.645522	1	0.201493	0.485075	0.61194	0.686567	0.966418	0.011194	0.13806	0.425373	0.80597	0.985075	0.481343	0.47191	0.022388	0.283582	0.529851	0.716418	0.985075	0.320896
0.2	0.41	0.39	0.222222	0.050505	0.30303	0.23	0.39	0.76	0.88	1	0.02	0.3	0.46	0.73	0.99	0.01	0.14	0.41	0.63	0.84	0.5	0.02	0.48	0.020202	0.040404	0	0.01	0.34	0.75	0.87	1	0.41	0.41	0.41	0.41	0.42	0.02	0.13	0.49	0.61	0.73	0.48	0.20202	0.04	0.31	0.5	0.63	0.88	0.39
0.350543	0.328804	0.320652	0.212534	0.207084	0.245232	0.008152	0.209239	0.472826	0.706522	0.997283	0.021739	0.236413	0.475543	0.785326	0.980978	0.002717	0.304348	0.540761	0.76087	1	0.459239	0.103261	0.4375	0.049046	0.076294	0.010899	0.002717	0.201087	0.391304	0.75	1	0.116848	0.404891	0.513587	0.853261	0.997283	0.040761	0.304348	0.570652	0.709239	0.975543	0.418478	0.386921	0.038043	0.304348	0.532609	0.717391	0.991848	0.369565
0.30137	0.356164	0.342466	0.25	0.194444	0.25	0.054795	0.424658	0.616438	0.794521	0.986301	0.041096	0.205479	0.383562	0.671233	0.958904	0.013699	0.219178	0.39726	0.561644	1	0.328767	0.136986	0.534247	0.055556	0.069444	0	0.013699	0.082192	0.561644	0.849315	0.986301	0.479452	0.493151	0.534247	0.890411	0.931507	0.109589	0.219178	0.356164	0.712329	1	0.60274	0.333333	0.09589	0.260274	0.410959	0.643836	0.945205	0.369863
0.321888	0.433476	0.244635	0.284483	0.150862	0.232759	0.012876	0.321888	0.587983	0.806867	1	0.034335	0.253219	0.497854	0.781116	0.991416	0.004292	0.145923	0.334764	0.575107	0.957082	0.562232	0.098712	0.339056	0.034483	0.077586	0	0.004292	0.283262	0.540773	0.811159	1	0.377682	0.39485	0.420601	0.703863	0.862661	0.008584	0.103004	0.330472	0.660944	0.987124	0.424893	0.275862	0.008584	0.137339	0.403433	0.545064	0.922747	0.454936
0.355372	0.338843	0.305785	0.20332	0.232365	0.228216	0.016529	0.272727	0.504132	0.735537	1	0.008264	0.260331	0.545455	0.768595	0.987603	0.004132	0.177686	0.458678	0.681818	0.991736	0.541322	0.256198	0.202479	0.091286	0.041494	0	0.004132	0.380165	0.64876	0.863636	1	0.070248	0.22314	0.458678	0.68595	0.85124	0.012397	0.136364	0.18595	0.355372	0.628099	0.53719	0.373444	0.012397	0.301653	0.504132	0.690083	0.975207	0.338843
0.336538	0.293269	0.370192	0.169082	0.294686	0.236715	0.033654	0.235577	0.519231	0.735577	0.995192	0.014423	0.302885	0.509615	0.711538	0.975962	0.004808	0.192308	0.451923	0.759615	1	0.552885	0.283654	0.163462	0.115942	0.028986	0	0.004808	0.322115	0.519231	0.721154	1	0.254808	0.480769	0.711538	0.836538	0.995192	0.028846	0.0625	0.120192	0.158654	0.216346	0.519231	0.357488	0.019231	0.254808	0.5	0.75	0.990385	0.336538
0.30137	0.383562	0.315068	0.236111	0.180556	0.277778	0.082192	0.219178	0.684932	0.849315	0.972603	0.027397	0.315068	0.479452	0.712329	1	0.013699	0.109589	0.356164	0.534247	0.986301	0.506849	0.041096	0.452055	0.027778	0.166667	0	0.013699	0.273973	0.630137	0.835616	1	0.575342	0.575342	0.575342	0.589041	0.60274	0.041096	0.164384	0.369863	0.506849	0.863014	0.506849	0.333333	0.041096	0.232877	0.39726	0.520548	0.767123	0.342466
0.380841	0.457944	0.161215	0.316159	0.126464	0.128806	0.004673	0.149533	0.425234	0.656542	1	0.014019	0.345794	0.579439	0.759346	0.992991	0.002336	0.259346	0.46028	0.817757	0.997664	0.724299	0.067757	0.207944	0.028103	0.06089	0	0.002336	0.212617	0.478972	0.691589	1	0.091121	0.607477	0.820093	0.880841	0.911215	0.130841	0.252336	0.476636	0.859813	0.995327	0.245327	0.295082	0.009346	0.28972	0.53972	0.829439	0.997664	0.492991
0.307317	0.40813	0.284553	0.229642	0.17101	0.245928	0.006504	0.320325	0.55935	0.769106	0.996748	0.003252	0.252033	0.515447	0.793496	0.998374	0.001626	0.19187	0.403252	0.674797	1	0.474797	0.082927	0.442276	0.039088	0.071661	0	0.001626	0.313821	0.635772	0.821138	1	0.086179	0.308943	0.377236	0.710569	0.908943	0.004878	0.2	0.492683	0.62439	0.986992	0.489431	0.325733	0.004878	0.237398	0.41626	0.606504	0.986992	0.411382
0.250847	0.430508	0.318644	0.183673	0.156463	0.227891	0.077966	0.308475	0.566102	0.766102	0.989831	0.00678	0.183051	0.474576	0.728814	1	0.00339	0.240678	0.484746	0.725424	0.972881	0.345763	0.149153	0.505085	0.054422	0.102041	0	0.00339	0.213559	0.447458	0.677966	1	0.013559	0.162712	0.325424	0.420339	0.484746	0.040678	0.298305	0.627119	0.8	0.986441	0.616949	0.367347	0.010169	0.257627	0.505085	0.722034	0.983051	0.488136
0.374622	0.404834	0.220544	0.290909	0.139394	0.157576	0.006042	0.350453	0.613293	0.830816	0.987915	0.009063	0.205438	0.450151	0.706949	0.984894	0.003021	0.172205	0.383686	0.583082	1	0.564955	0.190332	0.244713	0.066667	0.072727	0	0.003021	0.271903	0.610272	0.809668	1	0.006042	0.126888	0.253776	0.459215	0.996979	0.048338	0.365559	0.507553	0.637462	0.89426	0.362538	0.339394	0.012085	0.138973	0.350453	0.574018	0.990937	0.425982
0.315682	0.380855	0.303462	0.24898	0.189796	0.24898	0.008147	0.268839	0.505092	0.739308	1	0.00611	0.230143	0.476578	0.753564	0.99389	0.002037	0.250509	0.496945	0.737271	0.995927	0.386965	0.279022	0.334012	0.1	0.055102	0.002041	0.002037	0.221996	0.421589	0.635438	1	0.034623	0.179226	0.558045	0.753564	0.93279	0.008147	0.374745	0.543788	0.796334	0.99389	0.613035	0.289796	0.014257	0.260692	0.547862	0.790224	0.995927	0.380855
0.211401	0.382423	0.406176	0.188095	0.133333	0.288095	0.007126	0.325416	0.591449	0.864608	1	0.004751	0.228029	0.463183	0.743468	0.995249	0.002375	0.230404	0.456057	0.67696	0.997625	0.391924	0.052257	0.555819	0.019048	0.047619	0.004762	0.002375	0.356295	0.781473	0.88361	1	0.014252	0.334917	0.422803	0.446556	0.909739	0.085511	0.220903	0.401425	0.617577	0.931116	0.622328	0.2	0.009501	0.232779	0.415677	0.650831	0.997625	0.410926
0.26824	0.448498	0.283262	0.219355	0.184946	0.255914	0.012876	0.22103	0.525751	0.740343	0.98927	0.004292	0.261803	0.446352	0.742489	1	0.002146	0.253219	0.549356	0.755365	0.993562	0.459227	0.128755	0.412017	0.070968	0.088172	0.002151	0.002146	0.244635	0.457082	0.813305	1	0.094421	0.257511	0.414163	0.622318	0.929185	0.006438	0.233906	0.587983	0.729614	0.969957	0.682403	0.331183	0.008584	0.281116	0.463519	0.736052	0.991416	0.469957
0.291016	0.369141	0.339844	0.227006	0.189824	0.238748	0.003906	0.220703	0.484375	0.769531	1	0.009766	0.201172	0.427734	0.707031	0.998047	0.001953	0.320312	0.554688	0.759766	0.970703	0.376953	0.09375	0.529297	0.027397	0.078278	0.007828	0.001953	0.154297	0.380859	0.732422	1	0.132812	0.404297	0.529297	0.933594	0.972656	0.044922	0.255859	0.570312	0.738281	0.962891	0.541016	0.395303	0.005859	0.302734	0.539062	0.736328	0.978516	0.380859
0.441176	0.279412	0.279412	0.268657	0.223881	0.208955	0.073529	0.220588	0.455882	0.661765	1	0.029412	0.323529	0.602941	0.823529	0.985294	0.014706	0.147059	0.338235	0.647059	0.955882	0.279412	0	0.720588	0	0.119403	0	0.014706	0.058824	0.441176	0.720588	1	0	0	0	0	0	0.073529	0.235294	0.514706	0.764706	0.955882	0.367647	0.477612	0.073529	0.264706	0.382353	0.647059	0.955882	0.294118
0.25974	0.324675	0.415584	0.197368	0.118421	0.276316	0.025974	0.285714	0.415584	0.597403	0.987013	0.051948	0.337662	0.545455	0.753247	0.974026	0.012987	0.155844	0.454545	0.779221	1	0.506494	0.311688	0.181818	0.078947	0.078947	0.026316	0.012987	0.272727	0.428571	0.714286	1	0.090909	0.155844	0.662338	0.87013	0.948052	0.077922	0.38961	0.558442	0.597403	0.649351	0.571429	0.315789	0.051948	0.181818	0.480519	0.766234	0.961039	0.38961
0.186047	0.430233	0.383721	0.163743	0.122807	0.327485	0.017442	0.255814	0.552326	0.825581	1	0.011628	0.261628	0.494186	0.761628	0.982558	0.005814	0.197674	0.465116	0.709302	0.994186	0.30814	0.104651	0.587209	0.035088	0.05848	0	0.005814	0.22093	0.383721	0.784884	1	0.232558	0.273256	0.302326	0.72093	0.75	0.052326	0.19186	0.5	0.674419	0.918605	0.726744	0.093567	0.05814	0.290698	0.494186	0.715116	0.912791	0.430233
0.285861	0.392418	0.321721	0.231795	0.161026	0.260513	0.002049	0.258197	0.44877	0.665984	1	0.008197	0.235656	0.51127	0.781762	0.995902	0.001025	0.253074	0.560451	0.76332	0.997951	0.493852	0.13627	0.369877	0.053333	0.053333	0.002051	0.001025	0.252049	0.472336	0.699795	1	0.038934	0.228484	0.516393	0.633197	0.997951	0.008197	0.246926	0.647541	0.770492	0.982582	0.609631	0.289231	0.008197	0.22541	0.469262	0.755123	0.997951	0.406762
0.323442	0.403561	0.272997	0.321429	0.169643	0.22619	0.005935	0.305638	0.501484	0.735905	1	0.023739	0.249258	0.48368	0.74184	0.997033	0.002967	0.186944	0.510386	0.765579	0.994065	0.436202	0.124629	0.439169	0.053571	0.071429	0	0.002967	0.31454	0.4273	0.72997	1	0.071217	0.142433	0.302671	0.744807	0.908012	0.005935	0.243323	0.590504	0.78635	0.994065	0.480712	0.386905	0.011869	0.192878	0.52819	0.750742	0.994065	0.388724
0.352705	0.350701	0.296593	0.246988	0.230924	0.210843	0.006012	0.236473	0.466934	0.699399	0.991984	0.01002	0.256513	0.51503	0.783567	0.997996	0.002004	0.248497	0.523046	0.751503	1	0.322645	0.092184	0.58517	0.032129	0.088353	0.008032	0.002004	0.208417	0.527054	0.739479	1	0.172345	0.296593	0.677355	0.721443	0.951904	0.014028	0.256513	0.466934	0.777555	0.991984	0.563126	0.413655	0.01002	0.234469	0.49499	0.725451	0.981964	0.336673
0.315476	0.380952	0.303571	0.244776	0.19403	0.250746	0.005952	0.247024	0.491071	0.785714	1	0.008929	0.255952	0.520833	0.729167	0.997024	0.002976	0.214286	0.449405	0.708333	0.982143	0.434524	0.142857	0.422619	0.056716	0.074627	0.002985	0.002976	0.327381	0.535714	0.755952	1	0.270833	0.622024	0.866071	0.910714	0.979167	0.011905	0.113095	0.377976	0.571429	0.827381	0.550595	0.38209	0.020833	0.220238	0.502976	0.732143	0.985119	0.395833
0.353516	0.318359	0.328125	0.203523	0.227006	0.213307	0.005859	0.279297	0.503906	0.734375	0.992188	0.003906	0.197266	0.480469	0.773438	1	0.001953	0.248047	0.501953	0.736328	0.984375	0.353516	0.146484	0.5	0.050881	0.082192	0.015656	0.001953	0.283203	0.480469	0.726562	1	0.082031	0.214844	0.34375	0.777344	0.990234	0.007812	0.238281	0.503906	0.751953	0.988281	0.542969	0.399217	0.007812	0.212891	0.46875	0.689453	0.984375	0.328125
0.346278	0.36246	0.291262	0.282468	0.191558	0.211039	0.019417	0.216828	0.475728	0.744337	0.993528	0.006472	0.262136	0.504854	0.760518	0.996764	0.003236	0.275081	0.495146	0.718447	1	0.530744	0.132686	0.33657	0.048701	0.087662	0.00974	0.003236	0.200647	0.478964	0.731392	1	0.064725	0.226537	0.291262	0.449838	0.530744	0.009709	0.339806	0.676375	0.81877	0.967638	0.524272	0.331169	0.012945	0.297735	0.517799	0.757282	0.964401	0.417476
0.414966	0.285714	0.29932	0.30137	0.246575	0.143836	0.013605	0.197279	0.537415	0.755102	0.993197	0.068027	0.285714	0.503401	0.721088	1	0.006803	0.244898	0.414966	0.619048	0.938776	0.238095	0.006803	0.755102	0	0.054795	0.013699	0.006803	0.428571	0.687075	0.748299	1	0.034014	0.034014	0.034014	0.034014	0.034014	0.027211	0.210884	0.455782	0.680272	0.938776	0.503401	0.410959	0.020408	0.272109	0.414966	0.646259	0.938776	0.22449
0.279006	0.35221	0.368785	0.211618	0.193638	0.250346	0.005525	0.230663	0.544199	0.780387	1	0.004144	0.222376	0.490331	0.743094	0.995856	0.001381	0.266575	0.448895	0.714088	0.994475	0.292818	0.131215	0.575967	0.049793	0.069156	0.005533	0.001381	0.15884	0.642265	0.792818	1	0.092541	0.153315	0.680939	0.783149	0.970994	0.022099	0.305249	0.473757	0.628453	0.997238	0.643646	0.343015	0.013812	0.274862	0.487569	0.733425	0.994475	0.328729
0.127389	0.420382	0.452229	0.076923	0.141026	0.423077	0.031847	0.210191	0.484076	0.757962	0.993631	0.012739	0.292994	0.541401	0.745223	0.987261	0.006369	0.191083	0.43949	0.713376	1	0.184713	0.082803	0.732484	0.019231	0.070513	0.00641	0.006369	0.350318	0.541401	0.738854	1	0.159236	0.171975	0.55414	0.573248	0.598726	0.019108	0.242038	0.452229	0.77707	0.961783	0.840764	0.166667	0.019108	0.254777	0.484076	0.700637	0.968153	0.394904
0.326582	0.362025	0.311392	0.258883	0.215736	0.22335	0.005063	0.232911	0.475949	0.751899	1	0.007595	0.189873	0.437975	0.711392	0.994937	0.002532	0.331646	0.564557	0.78481	0.989873	0.587342	0.126582	0.286076	0.055838	0.076142	0	0.002532	0.16962	0.387342	0.691139	1	0.086076	0.4	0.501266	0.708861	0.987342	0.217722	0.435443	0.622785	0.774684	0.951899	0.468354	0.340102	0.01519	0.341772	0.549367	0.767089	0.989873	0.367089
0.264286	0.414286	0.321429	0.201439	0.136691	0.244604	0.028571	0.264286	0.535714	0.785714	1	0.014286	0.207143	0.521429	0.814286	0.985714	0.007143	0.25	0.407143	0.678571	0.95	0.535714	0.121429	0.342857	0.057554	0.043165	0	0.007143	0.15	0.471429	0.807143	1	0.085714	0.5	0.528571	0.907143	0.957143	0.278571	0.357143	0.442857	0.685714	0.785714	0.464286	0.258993	0.021429	0.292857	0.414286	0.671429	0.95	0.414286
0.325893	0.368304	0.305804	0.255034	0.205817	0.212528	0.004464	0.274554	0.522321	0.754464	0.997768	0.006696	0.207589	0.399554	0.678571	1	0.002232	0.303571	0.575893	0.785714	0.995536	0.450893	0.120536	0.428571	0.04698	0.096197	0.006711	0.002232	0.174107	0.439732	0.665179	1	0.006696	0.430804	0.591518	0.727679	0.84375	0.084821	0.247768	0.544643	0.803571	0.977679	0.589286	0.384787	0.006696	0.245536	0.484375	0.720982	0.995536	0.357143
0.309645	0.383249	0.307107	0.239186	0.195929	0.249364	0.005076	0.225888	0.451777	0.725888	1	0.007614	0.269036	0.517766	0.748731	0.989848	0.002538	0.218274	0.477157	0.736041	0.997462	0.307107	0.28934	0.403553	0.101781	0.081425	0.005089	0.002538	0.238579	0.484772	0.654822	1	0.005076	0.220812	0.398477	0.555838	0.736041	0.030457	0.263959	0.728426	0.852792	0.979695	0.560914	0.361323	0.007614	0.246193	0.497462	0.741117	0.997462	0.380711
0.328244	0.312977	0.358779	0.172414	0.210728	0.256705	0.026718	0.20229	0.427481	0.69084	0.992366	0.01145	0.28626	0.576336	0.78626	0.984733	0.003817	0.232824	0.51145	0.759542	1	0.389313	0.259542	0.351145	0.08046	0.065134	0.011494	0.003817	0.251908	0.465649	0.740458	1	0.019084	0.141221	0.320611	0.770992	0.977099	0.076336	0.354962	0.538168	0.71374	0.908397	0.614504	0.329502	0.034351	0.274809	0.583969	0.778626	0.996183	0.335878
0.271429	0.478571	0.25	0.280576	0.158273	0.223022	0.021429	0.221429	0.521429	0.785714	1	0.014286	0.192857	0.457143	0.728571	0.971429	0.007143	0.264286	0.5	0.764286	0.992857	0.535714	0.242857	0.221429	0.071942	0.071942	0	0.007143	0.128571	0.3	0.692857	1	0.621429	0.671429	0.792857	0.878571	0.957143	0.214286	0.342857	0.4	0.464286	0.571429	0.442857	0.330935	0.157143	0.385714	0.528571	0.778571	0.957143	0.492857
0.246106	0.439252	0.314642	0.2375	0.14375	0.253125	0.015576	0.305296	0.560748	0.750779	0.993769	0.006231	0.252336	0.476636	0.732087	1	0.003115	0.214953	0.445483	0.747664	0.987539	0.436137	0.040498	0.523364	0.0375	0.10625	0.00625	0.003115	0.271028	0.510903	0.760125	1	0.102804	0.46729	0.623053	0.741433	0.971963	0.024922	0.208723	0.489097	0.697819	0.965732	0.52648	0.3875	0.028037	0.221184	0.429907	0.688474	0.987539	0.482866
0.309278	0.319588	0.371134	0.197917	0.1875	0.239583	0.061856	0.206186	0.628866	0.804124	1	0.020619	0.237113	0.536082	0.71134	0.958763	0.010309	0.268041	0.412371	0.556701	0.989691	0.381443	0.154639	0.463918	0.083333	0.041667	0	0.010309	0.14433	0.608247	0.701031	1	0.041237	0.061856	0.175258	0.948454	0.989691	0.257732	0.360825	0.474227	0.587629	0.835052	0.443299	0.375	0.030928	0.28866	0.453608	0.597938	0.969072	0.350515
0.242236	0.322981	0.434783	0.14375	0.175	0.28125	0.012422	0.409938	0.639752	0.869565	1	0.018634	0.204969	0.459627	0.714286	0.956522	0.006211	0.192547	0.42236	0.68323	0.993789	0.285714	0.118012	0.596273	0.0375	0.075	0	0.006211	0.291925	0.552795	0.720497	1	0.583851	0.602484	0.763975	0.826087	0.857143	0.043478	0.21118	0.403727	0.677019	0.993789	0.720497	0.25	0.024845	0.229814	0.447205	0.714286	0.993789	0.347826
0.239362	0.393617	0.367021	0.192513	0.139037	0.299465	0.015957	0.329787	0.542553	0.696809	0.968085	0.010638	0.223404	0.425532	0.728723	0.989362	0.005319	0.18617	0.478723	0.765957	1	0.473404	0.292553	0.234043	0.128342	0.074866	0	0.005319	0.303191	0.505319	0.739362	1	0.132979	0.223404	0.473404	0.68617	0.920213	0.037234	0.095745	0.441489	0.781915	0.840426	0.680851	0.320856	0.026596	0.191489	0.473404	0.744681	0.984043	0.409574
0.253165	0.335443	0.411392	0.127389	0.178344	0.286624	0.056962	0.360759	0.734177	0.867089	0.993671	0.012658	0.196203	0.455696	0.696203	1	0.006329	0.234177	0.417722	0.582278	0.936709	0.14557	0.006329	0.848101	0	0.089172	0.012739	0.006329	0.21519	0.537975	0.879747	1	0.71519	0.71519	0.71519	0.71519	0.71519	0.018987	0.259494	0.474684	0.734177	0.974684	0.64557	0.280255	0.018987	0.183544	0.411392	0.588608	0.955696	0.322785
0.321168	0.408759	0.270073	0.217073	0.180488	0.236585	0.012165	0.180049	0.408759	0.759124	1	0.004866	0.26764	0.508516	0.734793	0.997567	0.002433	0.253041	0.537713	0.749392	0.990268	0.564477	0.128954	0.306569	0.04878	0.068293	0	0.002433	0.294404	0.510949	0.817518	1	0.3309	0.46472	0.547445	0.608273	0.785888	0.046229	0.136253	0.272506	0.678832	0.965937	0.420925	0.390244	0.009732	0.29927	0.523114	0.729927	0.96837	0.43309
0.298137	0.42236	0.279503	0.19375	0.19375	0.20625	0.055901	0.223602	0.440994	0.850932	0.993789	0.012422	0.248447	0.484472	0.68323	0.975155	0.006211	0.267081	0.509317	0.720497	1	0.478261	0.161491	0.360248	0.0875	0.075	0	0.006211	0.242236	0.465839	0.652174	1	0.223602	0.285714	0.391304	0.490683	0.608696	0.055901	0.149068	0.73913	0.881988	0.981366	0.459627	0.425	0.074534	0.291925	0.509317	0.68323	0.968944	0.42236
0.311811	0.36063	0.327559	0.217666	0.18612	0.255521	0.047244	0.266142	0.491339	0.729134	0.993701	0.006299	0.2	0.499213	0.751181	0.984252	0.001575	0.267717	0.505512	0.759055	1	0.541732	0.286614	0.171654	0.124606	0.055205	0.001577	0.001575	0.292913	0.529134	0.737008	1	0.033071	0.188976	0.376378	0.622047	0.998425	0.00315	0.234646	0.770079	0.894488	0.95748	0.622047	0.318612	0.00315	0.220472	0.464567	0.71811	0.995276	0.362205
0.193146	0.361371	0.445483	0.134375	0.140625	0.328125	0.006231	0.327103	0.647975	0.82243	0.993769	0.009346	0.199377	0.442368	0.806854	0.996885	0.003115	0.233645	0.489097	0.700935	1	0.246106	0.015576	0.738318	0.003125	0.065625	0.009375	0.003115	0.05919	0.529595	0.878505	1	0.401869	0.401869	0.507788	0.510903	0.517134	0.068536	0.255452	0.476636	0.722741	0.937695	0.713396	0.1375	0.015576	0.252336	0.461059	0.707165	0.937695	0.373832
0.348485	0.340909	0.310606	0.236641	0.221374	0.19084	0.015152	0.318182	0.515152	0.666667	0.954545	0.030303	0.234848	0.401515	0.734848	0.992424	0.007576	0.181818	0.507576	0.75	1	0.363636	0.136364	0.5	0.068702	0.038168	0.007634	0.007576	0.143939	0.295455	0.621212	1	0.030303	0.05303	0.166667	0.242424	0.659091	0.310606	0.462121	0.674242	0.795455	0.924242	0.492424	0.366412	0.030303	0.19697	0.477273	0.727273	0.962121	0.318182
0.365726	0.297806	0.336468	0.212343	0.248954	0.199791	0.00418	0.285266	0.520376	0.77116	1	0.003135	0.248694	0.499478	0.713689	0.99582	0.001045	0.221526	0.438871	0.746082	0.996865	0.340648	0.029258	0.630094	0.007322	0.095188	0.001046	0.001045	0.31139	0.550679	0.727273	1	0.585162	0.591432	0.607106	0.61442	0.628004	0.00418	0.218391	0.439916	0.794148	0.996865	0.492163	0.41841	0.005225	0.240334	0.485893	0.76907	0.988506	0.335423
0.400552	0.29558	0.303867	0.238227	0.216066	0.171745	0.030387	0.312155	0.530387	0.765193	0.997238	0.01105	0.196133	0.447514	0.729282	0.991713	0.002762	0.190608	0.461326	0.712707	1	0.458564	0.016575	0.524862	0.027701	0.121884	0.00554	0.002762	0.179558	0.472376	0.751381	1	0.016575	0.016575	0.433702	0.596685	0.922652	0.013812	0.337017	0.527624	0.729282	0.991713	0.497238	0.426593	0.008287	0.201657	0.453039	0.723757	0.991713	0.328729
0.256098	0.463415	0.280488	0.222222	0.135802	0.283951	0.04878	0.231707	0.414634	0.780488	1	0.012195	0.207317	0.487805	0.695122	0.97561	0.073171	0.219512	0.52439	0.743902	0.987805	0.45122	0.04878	0.5	0.098765	0.123457	0	0.012195	0.243902	0.463415	0.719512	1	0.195122	0.195122	0.256098	0.634146	0.743902	0.036585	0.170732	0.5	0.829268	0.963415	0.402439	0.444444	0.073171	0.219512	0.487805	0.719512	0.963415	0.5
0.303318	0.35545	0.341232	0.209524	0.2	0.22381	0.018957	0.184834	0.50237	0.687204	0.981043	0.009479	0.236967	0.436019	0.725118	1	0.004739	0.303318	0.526066	0.805687	0.995261	0.374408	0.241706	0.383886	0.085714	0.095238	0	0.004739	0.241706	0.478673	0.772512	1	0.379147	0.606635	0.781991	0.872038	0.966825	0.014218	0.127962	0.327014	0.526066	0.767773	0.57346	0.361905	0.033175	0.327014	0.49763	0.720379	0.985782	0.35545
0.315615	0.375415	0.30897	0.224626	0.196339	0.234609	0.011628	0.27907	0.488372	0.752492	1	0.003322	0.166113	0.440199	0.72093	0.998339	0.001661	0.332226	0.561462	0.767442	0.993355	0.5299	0.094684	0.375415	0.053245	0.079867	0.003328	0.001661	0.13289	0.310631	0.631229	1	0.245847	0.277409	0.365449	0.471761	0.965116	0.112957	0.538206	0.707641	0.848837	0.981728	0.465116	0.359401	0.003322	0.372093	0.538206	0.76412	0.98505	0.393688
0.31135	0.368098	0.320552	0.228879	0.207373	0.230415	0.01227	0.25	0.470859	0.697853	0.993865	0.003067	0.256135	0.509202	0.791411	1	0.001534	0.239264	0.48773	0.726994	0.996933	0.43865	0.196319	0.365031	0.078341	0.084485	0.004608	0.001534	0.243865	0.506135	0.754601	1	0.09816	0.18865	0.404908	0.773006	0.969325	0.006135	0.282209	0.529141	0.711656	0.976994	0.570552	0.384025	0.003067	0.27454	0.501534	0.745399	0.996933	0.377301
0.294118	0.352941	0.352941	0.206751	0.198312	0.248945	0.033613	0.327731	0.508403	0.735294	0.991597	0.008403	0.222689	0.436975	0.752101	0.995798	0.004202	0.201681	0.512605	0.743697	1	0.403361	0.008403	0.588235	0.008439	0.059072	0	0.004202	0.163866	0.394958	0.743697	1	0.37395	0.37395	0.37395	0.37395	0.378151	0.084034	0.306723	0.571429	0.823529	0.987395	0.542017	0.43038	0.016807	0.218487	0.478992	0.710084	0.983193	0.348739
0.298126	0.364566	0.337308	0.197952	0.1843	0.264505	0.008518	0.241908	0.482112	0.72402	0.993186	0.003407	0.231687	0.477002	0.756388	1	0.001704	0.282794	0.53322	0.758092	0.998296	0.378194	0.144804	0.477002	0.059727	0.093857	0.005119	0.001704	0.219761	0.545145	0.761499	1	0.010221	0.199319	0.350937	0.618399	0.897785	0.044293	0.279387	0.516184	0.764906	0.969336	0.586031	0.375427	0.011925	0.247019	0.459966	0.693356	0.989779	0.383305
0.371069	0.301887	0.327044	0.189873	0.234177	0.240506	0.018868	0.18239	0.477987	0.761006	1	0.025157	0.345912	0.509434	0.742138	0.993711	0.006289	0.238994	0.459119	0.698113	0.987421	0.477987	0.345912	0.176101	0.202532	0.050633	0	0.006289	0.251572	0.528302	0.779874	1	0.106918	0.245283	0.578616	0.792453	0.962264	0.025157	0.062893	0.314465	0.503145	0.63522	0.63522	0.392405	0.012579	0.283019	0.490566	0.704403	0.987421	0.358491
0.383784	0.281081	0.335135	0.206522	0.25	0.217391	0.07027	0.264865	0.535135	0.756757	0.994595	0.032432	0.205405	0.491892	0.697297	0.989189	0.005405	0.210811	0.459459	0.745946	1	0.291892	0.124324	0.583784	0.054348	0.097826	0	0.005405	0.221622	0.475676	0.691892	1	0.010811	0.032432	0.459459	0.6	0.875676	0.07027	0.286486	0.518919	0.772973	0.989189	0.535135	0.423913	0.010811	0.178378	0.464865	0.681081	0.983784	0.308108
0.431579	0.326316	0.242105	0.340426	0.191489	0.12766	0.021053	0.252632	0.578947	0.747368	0.978947	0.031579	0.2	0.431579	0.789474	0.968421	0.010526	0.210526	0.410526	0.663158	1	0.357895	0.031579	0.610526	0.021277	0.085106	0	0.010526	0.389474	0.789474	0.873684	1	0.968421	0.968421	0.968421	0.978947	0.989474	0.063158	0.2	0.368421	0.610526	0.768421	0.368421	0.510638	0.063158	0.210526	0.410526	0.631579	0.968421	0.357895
0.264574	0.345291	0.390135	0.193694	0.211712	0.265766	0.008969	0.26009	0.506726	0.730942	0.986547	0.017937	0.29148	0.502242	0.717489	0.964126	0.004484	0.179372	0.44843	0.762332	1	0.533632	0.130045	0.336323	0.054054	0.108108	0.009009	0.004484	0.381166	0.591928	0.793722	1	0.130045	0.538117	0.690583	0.762332	0.973094	0.017937	0.103139	0.255605	0.426009	0.932735	0.502242	0.378378	0.022422	0.170404	0.475336	0.753363	0.991031	0.421525
0.367542	0.393795	0.238663	0.263158	0.169856	0.220096	0.00716	0.243437	0.486874	0.732697	1	0.004773	0.23389	0.541766	0.747017	0.99284	0.002387	0.279236	0.47494	0.754177	0.98568	0.768496	0.026253	0.205251	0.011962	0.069378	0.002392	0.002387	0.23389	0.443914	0.72315	1	0.033413	0.0358	0.205251	0.212411	0.976134	0.133652	0.472554	0.527446	0.825776	0.97136	0.338902	0.397129	0.02148	0.298329	0.479714	0.74463	0.98568	0.417661
0.355191	0.360656	0.284153	0.214286	0.186813	0.258242	0.016393	0.240437	0.415301	0.622951	1	0.010929	0.306011	0.612022	0.830601	0.994536	0.005464	0.202186	0.464481	0.710383	0.989071	0.338798	0	0.661202	0	0.098901	0	0.005464	0.311475	0.398907	0.814208	1	0	0	0	0	0	0.016393	0.229508	0.535519	0.737705	0.989071	0.453552	0.450549	0.032787	0.245902	0.535519	0.737705	0.972678	0.360656
0.277533	0.411894	0.310573	0.236203	0.161148	0.269316	0.004405	0.268722	0.480176	0.759912	0.997797	0.006608	0.222467	0.482379	0.720264	1	0.002203	0.259912	0.544053	0.748899	0.991189	0.464758	0.14978	0.385463	0.05298	0.07947	0.004415	0.002203	0.259912	0.511013	0.755507	1	0.028634	0.209251	0.537445	0.797357	0.993392	0.046256	0.244493	0.449339	0.718062	0.96696	0.64978	0.291391	0.024229	0.26652	0.513216	0.729075	0.991189	0.429515
0.380734	0.261468	0.357798	0.175115	0.258065	0.193548	0.009174	0.192661	0.481651	0.747706	0.986239	0.022936	0.238532	0.43578	0.651376	0.977064	0.004587	0.275229	0.53211	0.733945	1	0.408257	0.169725	0.422018	0.073733	0.092166	0	0.004587	0.261468	0.417431	0.706422	1	0.233945	0.293578	0.527523	0.724771	0.876147	0.022936	0.151376	0.545872	0.775229	0.977064	0.577982	0.387097	0.013761	0.298165	0.527523	0.724771	0.990826	0.270642
0.272727	0.376623	0.350649	0.176471	0.228758	0.281046	0.012987	0.181818	0.441558	0.714286	0.993506	0.077922	0.253247	0.512987	0.746753	0.980519	0.006494	0.220779	0.558442	0.772727	1	0.357143	0.168831	0.474026	0.065359	0.130719	0	0.006494	0.142857	0.454545	0.714286	1	0.038961	0.071429	0.474026	0.649351	0.831169	0.097403	0.266234	0.538961	0.792208	0.980519	0.694805	0.352941	0.025974	0.266234	0.525974	0.733766	0.967532	0.318182
0.271903	0.332326	0.39577	0.175758	0.2	0.275758	0.036254	0.296073	0.495468	0.746224	0.984894	0.006042	0.226586	0.516616	0.716012	1	0.003021	0.202417	0.486405	0.776435	0.993958	0.462236	0.141994	0.39577	0.060606	0.066667	0	0.003021	0.23565	0.598187	0.794562	1	0.196375	0.34139	0.531722	0.628399	0.930514	0.012085	0.135952	0.456193	0.749245	0.978852	0.670695	0.345455	0.012085	0.199396	0.483384	0.728097	0.993958	0.283988
0.228188	0.348993	0.422819	0.144781	0.151515	0.292929	0.040268	0.234899	0.439597	0.805369	0.996644	0.010067	0.278523	0.473154	0.738255	0.993289	0.003356	0.204698	0.533557	0.711409	1	0.348993	0.114094	0.536913	0.043771	0.063973	0.003367	0.003356	0.241611	0.395973	0.771812	1	0.151007	0.174497	0.261745	0.731544	0.788591	0.010067	0.379195	0.560403	0.714765	0.942953	0.587248	0.316498	0.010067	0.251678	0.513423	0.728188	0.986577	0.33557
0.326389	0.384259	0.289352	0.225058	0.155452	0.24594	0.018519	0.217593	0.386574	0.650463	0.993056	0.00463	0.199074	0.456019	0.719907	1	0.002315	0.4375	0.627315	0.800926	0.990741	0.486111	0.05787	0.456019	0.032483	0.078886	0.00464	0.002315	0.152778	0.293981	0.497685	1	0.335648	0.412037	0.467593	0.527778	0.993056	0.009259	0.550926	0.664352	0.784722	0.988426	0.43287	0.320186	0.009259	0.506944	0.668981	0.814815	0.990741	0.402778
0.333333	0.333333	0.333333	0.216495	0.247423	0.237113	0.010256	0.251282	0.502564	0.758974	0.984615	0.020513	0.297436	0.476923	0.697436	0.994872	0.005128	0.189744	0.435897	0.733333	1	0.287179	0.005128	0.707692	0.010309	0.103093	0	0.005128	0.148718	0.410256	0.871795	1	0.984615	0.984615	0.984615	0.984615	0.984615	0.015385	0.246154	0.512821	0.723077	0.933333	0.523077	0.43299	0.015385	0.225641	0.415385	0.707692	0.989744	0.312821
0.317365	0.353293	0.329341	0.228916	0.198795	0.26506	0.041916	0.299401	0.532934	0.730539	1	0.011976	0.161677	0.461078	0.760479	0.994012	0.005988	0.191617	0.479042	0.736527	0.97006	0.42515	0.377246	0.197605	0.084337	0.024096	0	0.005988	0.317365	0.562874	0.874251	1	0.233533	0.389222	0.60479	0.736527	0.94012	0.023952	0.065868	0.113772	0.161677	0.431138	0.562874	0.385542	0.023952	0.167665	0.48503	0.730539	0.994012	0.353293
0.230263	0.401316	0.368421	0.181518	0.141914	0.330033	0.006579	0.246711	0.463816	0.779605	0.996711	0.009868	0.322368	0.582237	0.789474	1	0.003289	0.161184	0.414474	0.638158	0.970395	0.289474	0.0625	0.648026	0.029703	0.082508	0.0033	0.003289	0.332237	0.588816	0.865132	1	0.226974	0.319079	0.355263	0.398026	0.858553	0.013158	0.177632	0.506579	0.694079	0.967105	0.674342	0.257426	0.016447	0.269737	0.5	0.684211	0.970395	0.404605
0.364486	0.29595	0.339564	0.24375	0.228125	0.19375	0.015576	0.227414	0.523364	0.735202	1	0.009346	0.242991	0.46729	0.738318	0.971963	0.003115	0.258567	0.489097	0.747664	0.996885	0.401869	0.286604	0.311526	0.1125	0.06875	0.0125	0.003115	0.311526	0.53271	0.738318	1	0.031153	0.258567	0.551402	0.747664	0.937695	0.012461	0.155763	0.395639	0.850467	0.990654	0.58567	0.3625	0.012461	0.267913	0.498442	0.775701	0.990654	0.302181
0.263158	0.392344	0.344498	0.196643	0.177458	0.268585	0.009569	0.263158	0.547847	0.753589	0.995215	0.004785	0.220096	0.476077	0.739234	0.990431	0.002392	0.248804	0.478469	0.755981	1	0.511962	0.208134	0.279904	0.076739	0.067146	0.019185	0.002392	0.263158	0.516746	0.751196	1	0.004785	0.172249	0.342105	0.665072	0.940191	0.074163	0.258373	0.526316	0.815789	0.897129	0.588517	0.311751	0.007177	0.270335	0.488038	0.732057	0.980861	0.444976
0.318182	0.30303	0.378788	0.230769	0.230769	0.138462	0.045455	0.272727	0.515152	0.666667	0.969697	0.060606	0.363636	0.545455	0.757576	0.939394	0.015152	0.166667	0.333333	0.727273	1	0.30303	0.257576	0.439394	0.061538	0.092308	0.030769	0.015152	0.333333	0.484848	0.606061	1	0.136364	0.424242	0.848485	0.909091	0.984848	0.060606	0.166667	0.272727	0.651515	0.772727	0.515152	0.492308	0.075758	0.212121	0.393939	0.681818	0.954545	0.287879
0.300912	0.346505	0.352584	0.204268	0.176829	0.253049	0.009119	0.282675	0.49848	0.699088	1	0.036474	0.215805	0.550152	0.81459	0.990881	0.00304	0.218845	0.471125	0.738602	0.987842	0.43769	0.224924	0.337386	0.088415	0.070122	0.009146	0.00304	0.206687	0.556231	0.844985	1	0.009119	0.091185	0.355623	0.586626	0.984802	0.209726	0.340426	0.50152	0.711246	0.808511	0.559271	0.353659	0.006079	0.237082	0.443769	0.683891	0.987842	0.319149
0.388889	0.209877	0.401235	0.136646	0.248447	0.173913	0.018519	0.209877	0.487654	0.691358	0.993827	0.012346	0.228395	0.382716	0.722222	0.975309	0.006173	0.253086	0.537037	0.740741	1	0.401235	0.265432	0.333333	0.099379	0.062112	0.024845	0.006173	0.203704	0.41358	0.617284	1	0.092593	0.234568	0.481481	0.783951	0.876543	0.018519	0.259259	0.580247	0.895062	0.981481	0.524691	0.372671	0.030864	0.283951	0.574074	0.777778	0.975309	0.240741
0.224409	0.535433	0.240157	0.245059	0.130435	0.221344	0.011811	0.287402	0.519685	0.76378	1	0.007874	0.240157	0.480315	0.720472	0.976378	0.003937	0.228346	0.488189	0.748031	0.996063	0.901575	0.094488	0.003937	0.071146	0.007905	0	0.003937	0.259843	0.5	0.73622	1	0.019685	0.086614	0.484252	0.929134	0.992126	0.295276	0.295276	0.295276	0.295276	0.295276	0.503937	0.284585	0.027559	0.330709	0.53937	0.791339	0.996063	0.5
0.310345	0.336207	0.353448	0.177489	0.17316	0.246753	0.012931	0.297414	0.487069	0.689655	1	0.017241	0.206897	0.556034	0.767241	0.982759	0.00431	0.198276	0.482759	0.75431	0.99569	0.551724	0.206897	0.241379	0.103896	0.034632	0	0.00431	0.198276	0.517241	0.698276	1	0.12931	0.383621	0.482759	0.862069	0.991379	0.008621	0.232759	0.336207	0.775862	0.836207	0.521552	0.354978	0.008621	0.280172	0.560345	0.793103	0.99569	0.413793
0.243421	0.421053	0.335526	0.258278	0.165563	0.291391	0.013158	0.335526	0.513158	0.710526	0.993421	0.019737	0.236842	0.519737	0.743421	1	0.006579	0.131579	0.414474	0.763158	0.986842	0.427632	0.184211	0.388158	0.05298	0.092715	0	0.006579	0.460526	0.638158	0.848684	1	0.559211	0.598684	0.697368	0.822368	0.888158	0.013158	0.111842	0.210526	0.309211	0.940789	0.427632	0.291391	0.052632	0.190789	0.302632	0.690789	0.986842	0.440789
0.271207	0.408602	0.320191	0.206938	0.19378	0.245215	0.002389	0.273596	0.55675	0.774194	1	0.004779	0.198327	0.461171	0.714456	0.997611	0.001195	0.262843	0.501792	0.752688	0.996416	0.686977	0.238949	0.074074	0.117225	0.023923	0	0.001195	0.225806	0.524492	0.734767	1	0.063321	0.240143	0.507766	0.812425	0.973716	0.082437	0.416965	0.446834	0.473118	0.995221	0.425329	0.435407	0.003584	0.240143	0.449223	0.712067	0.996416	0.498208
0.34322	0.360169	0.29661	0.285106	0.182979	0.212766	0.012712	0.258475	0.504237	0.75	0.995763	0.033898	0.262712	0.508475	0.788136	1	0.004237	0.194915	0.466102	0.677966	0.974576	0.334746	0.063559	0.601695	0.025532	0.093617	0	0.004237	0.309322	0.529661	0.855932	1	0.313559	0.322034	0.338983	0.961864	0.978814	0.008475	0.190678	0.483051	0.65678	0.932203	0.508475	0.382979	0.012712	0.262712	0.478814	0.673729	0.978814	0.381356
0.160237	0.418398	0.421365	0.111441	0.109955	0.384844	0.002967	0.264095	0.557864	0.77003	1	0.007418	0.272997	0.510386	0.740356	0.995549	0.001484	0.222552	0.458457	0.744807	0.998516	0.250742	0.091988	0.65727	0.034175	0.069837	0.013373	0.001484	0.264095	0.563798	0.716617	1	0.005935	0.094955	0.154303	0.670623	0.95549	0.037092	0.277448	0.485163	0.781899	0.997033	0.795252	0.213967	0.005935	0.228487	0.470326	0.719585	0.992582	0.367953
0.253112	0.497925	0.248963	0.241667	0.141667	0.229167	0.012448	0.319502	0.576763	0.788382	0.966805	0.008299	0.253112	0.46473	0.738589	1	0.004149	0.091286	0.410788	0.717842	0.995851	0.622407	0.26971	0.107884	0.104167	0.020833	0.0125	0.004149	0.307054	0.526971	0.788382	1	0.128631	0.340249	0.551867	0.738589	0.879668	0.012448	0.033195	0.062241	0.087137	0.539419	0.614108	0.358333	0.016598	0.257261	0.477178	0.73444	0.995851	0.46888
0.288625	0.380306	0.33107	0.207483	0.193878	0.243197	0.011885	0.239389	0.441426	0.706282	0.993209	0.003396	0.249576	0.575552	0.803056	1	0.001698	0.252971	0.458404	0.730051	0.996604	0.463497	0.241087	0.295416	0.102041	0.05102	0	0.001698	0.375212	0.604414	0.796265	1	0.035654	0.565365	0.719864	0.845501	0.996604	0.047538	0.17657	0.268251	0.366723	0.463497	0.560272	0.367347	0.005093	0.273345	0.548387	0.765705	0.996604	0.415959
0.251366	0.420765	0.327869	0.159341	0.164835	0.291209	0.010929	0.234973	0.448087	0.754098	1	0.027322	0.273224	0.530055	0.715847	0.983607	0.005464	0.218579	0.453552	0.73224	0.918033	0.404372	0.289617	0.306011	0.098901	0.043956	0.021978	0.005464	0.284153	0.469945	0.699454	1	0.120219	0.251366	0.437158	0.590164	0.737705	0.010929	0.081967	0.79235	0.868852	0.945355	0.584699	0.318681	0.016393	0.245902	0.52459	0.79235	0.956284	0.420765
0.266667	0.405128	0.328205	0.190722	0.185567	0.273196	0.015385	0.282051	0.502564	0.697436	1	0.010256	0.215385	0.425641	0.779487	0.989744	0.005128	0.266667	0.528205	0.769231	0.994872	0.441026	0.179487	0.379487	0.072165	0.082474	0.010309	0.005128	0.297436	0.502564	0.805128	1	0.020513	0.358974	0.425641	0.876923	0.979487	0.041026	0.153846	0.538462	0.65641	0.958974	0.538462	0.402062	0.010256	0.261538	0.471795	0.717949	0.979487	0.420513
0.421603	0.268293	0.310105	0.216783	0.262238	0.167832	0.006969	0.212544	0.477352	0.728223	1	0.055749	0.324042	0.557491	0.770035	0.979094	0.003484	0.222997	0.487805	0.731707	0.954704	0.407666	0.229965	0.362369	0.101399	0.052448	0.003497	0.003484	0.30662	0.547038	0.766551	1	0.069686	0.15331	0.421603	0.710801	0.902439	0.010453	0.229965	0.512195	0.770035	0.979094	0.522648	0.328671	0.010453	0.317073	0.567944	0.752613	0.979094	0.285714
0.35514	0.308411	0.336449	0.226415	0.198113	0.207547	0.028037	0.224299	0.448598	0.747664	1	0.018692	0.17757	0.46729	0.588785	0.981308	0.009346	0.299065	0.570093	0.813084	0.971963	0.485981	0.476636	0.037383	0.150943	0.018868	0	0.009346	0.17757	0.46729	0.626168	1	0.11215	0.271028	0.635514	0.82243	0.962617	0.53271	0.53271	0.542056	0.551402	0.560748	0.570093	0.377358	0.056075	0.271028	0.514019	0.775701	0.971963	0.28972
0.298592	0.36338	0.338028	0.211864	0.251412	0.248588	0.011268	0.278873	0.507042	0.746479	0.997183	0.008451	0.211268	0.501408	0.777465	1	0.002817	0.24507	0.484507	0.709859	0.994366	0.515493	0.177465	0.307042	0.073446	0.067797	0	0.002817	0.183099	0.55493	0.783099	1	0.033803	0.273239	0.51831	0.68169	0.988732	0.140845	0.298592	0.425352	0.605634	0.876056	0.55493	0.435028	0.005634	0.247887	0.48169	0.729577	0.994366	0.374648
0.503704	0.148148	0.348148	0.134328	0.395522	0.104478	0.022222	0.251852	0.444444	0.725926	1	0.037037	0.496296	0.666667	0.8	0.977778	0.007407	0.214815	0.451852	0.711111	0.992593	0.244444	0.074074	0.681481	0.037313	0.052239	0.007463	0.007407	0.518519	0.748148	0.807407	1	0.481481	0.703704	0.725926	0.962963	0.985185	0.014815	0.192593	0.362963	0.607407	0.918519	0.42963	0.462687	0.037037	0.222222	0.451852	0.711111	0.992593	0.177778
0.344624	0.344624	0.310751	0.20649	0.20649	0.234513	0.007364	0.297496	0.478645	0.689249	0.998527	0.002946	0.189985	0.438881	0.712813	1	0.001473	0.273932	0.583211	0.795287	0.997054	0.425626	0.064801	0.509573	0.029499	0.097345	0.00885	0.001473	0.151694	0.34757	0.631811	1	0.02651	0.104566	0.207658	0.248895	0.365243	0.017673	0.480118	0.656848	0.83947	0.986745	0.452135	0.39823	0.004418	0.285714	0.600884	0.798233	0.992636	0.388807
0.321311	0.354098	0.32459	0.253289	0.180921	0.259868	0.006557	0.304918	0.570492	0.763934	0.996721	0.022951	0.216393	0.459016	0.685246	0.990164	0.003279	0.186885	0.42623	0.754098	1	0.511475	0.242623	0.245902	0.082237	0.042763	0.003289	0.003279	0.239344	0.462295	0.652459	1	0.360656	0.445902	0.55082	0.790164	0.996721	0.036066	0.111475	0.255738	0.721311	0.921311	0.465574	0.335526	0.009836	0.186885	0.455738	0.77377	0.993443	0.390164
0.175055	0.380744	0.444201	0.144737	0.114035	0.33114	0.006565	0.2407	0.501094	0.713348	0.995624	0.008753	0.207877	0.472648	0.724289	1	0.002188	0.293217	0.536105	0.785558	0.993435	0.223195	0.019694	0.757112	0.004386	0.092105	0.008772	0.002188	0.16849	0.43326	0.698031	1	0.043764	0.045952	0.050328	0.054705	0.487965	0.021882	0.262582	0.525164	0.768053	0.995624	0.774617	0.162281	0.02407	0.247265	0.479212	0.739606	0.97593	0.358862
0.385995	0.30316	0.310845	0.206838	0.259829	0.184615	0.001708	0.269001	0.54398	0.774552	0.998292	0.003416	0.216055	0.483348	0.736977	0.999146	0.000854	0.257899	0.503843	0.723313	1	0.395389	0.030743	0.573868	0.01453	0.088034	0.004274	0.000854	0.187874	0.502135	0.715628	1	0.035013	0.11614	0.588386	0.921435	0.941076	0.002562	0.257045	0.445773	0.764304	0.998292	0.426985	0.411966	0.00427	0.23228	0.426132	0.699402	0.997438	0.334757
0.351297	0.341317	0.307385	0.258	0.222	0.206	0.007984	0.241517	0.51497	0.760479	0.992016	0.003992	0.267465	0.502994	0.794411	0.998004	0.001996	0.231537	0.487026	0.704591	1	0.305389	0.031936	0.662675	0.02	0.112	0.004	0.001996	0.267465	0.56487	0.826347	1	0.023952	0.638723	0.89022	0.904192	0.918164	0.033932	0.245509	0.45509	0.696607	0.988024	0.546906	0.368	0.00998	0.281437	0.479042	0.708583	0.99002	0.355289
0.260241	0.431325	0.308434	0.219807	0.157005	0.299517	0.012048	0.320482	0.559036	0.780723	0.99759	0.004819	0.219277	0.46747	0.73253	1	0.00241	0.250602	0.491566	0.744578	0.971084	0.438554	0.214458	0.346988	0.074879	0.074879	0.002415	0.00241	0.257831	0.515663	0.766265	1	0.024096	0.308434	0.503614	0.790361	0.973494	0.053012	0.212048	0.4	0.703614	0.891566	0.631325	0.347826	0.021687	0.26988	0.503614	0.742169	0.990361	0.474699
0.271429	0.338095	0.390476	0.167464	0.196172	0.239234	0.009524	0.157143	0.352381	0.52381	0.985714	0.02381	0.361905	0.604762	0.795238	1	0.004762	0.247619	0.571429	0.785714	0.980952	0.547619	0.242857	0.209524	0.090909	0.033493	0.004785	0.004762	0.214286	0.42381	0.638095	1	0.033333	0.109524	0.295238	0.552381	0.990476	0.204762	0.72381	0.82381	0.87619	0.928571	0.614286	0.325359	0.019048	0.257143	0.566667	0.795238	0.985714	0.366667
0.323741	0.320144	0.356115	0.184116	0.256318	0.227437	0.007194	0.230216	0.446043	0.802158	0.992806	0.021583	0.26259	0.460432	0.701439	0.989209	0.003597	0.244604	0.546763	0.769784	1	0.521583	0.230216	0.248201	0.079422	0.057762	0.00722	0.003597	0.201439	0.464029	0.780576	1	0.097122	0.309353	0.482014	0.694245	0.967626	0.010791	0.23741	0.543165	0.827338	0.942446	0.593525	0.389892	0.010791	0.255396	0.492806	0.723022	0.996403	0.320144
0.338875	0.38491	0.276215	0.245839	0.189501	0.213828	0.002558	0.249361	0.485934	0.696931	0.996164	0.011509	0.258312	0.517903	0.80179	1	0.001279	0.230179	0.484655	0.745524	0.998721	0.558824	0.318414	0.122762	0.107554	0.035851	0.002561	0.001279	0.258312	0.524297	0.805627	1	0.035806	0.200767	0.388747	0.571611	0.933504	0.002558	0.554987	0.777494	0.900256	0.987212	0.505115	0.353393	0.002558	0.237852	0.512788	0.7289	0.987212	0.401535
0.30531	0.387168	0.307522	0.223947	0.179601	0.248337	0.013274	0.243363	0.495575	0.785398	0.995575	0.004425	0.254425	0.486726	0.738938	1	0.002212	0.227876	0.502212	0.730088	0.997788	0.524336	0.128319	0.347345	0.066519	0.070953	0	0.002212	0.252212	0.535398	0.789823	1	0.073009	0.163717	0.539823	0.853982	0.960177	0.011062	0.261062	0.402655	0.634956	0.995575	0.586283	0.403548	0.015487	0.254425	0.497788	0.734513	0.993363	0.369469
0.537313	0.268657	0.19403	0.218045	0.150376	0.142857	0.014925	0.268657	0.455224	0.656716	1	0.059701	0.208955	0.597015	0.761194	0.947761	0.007463	0.119403	0.537313	0.865672	0.985075	0.402985	0	0.597015	0	0.105263	0	0.007463	0.171642	0.649254	0.746269	1	0	0	0	0	0	0.022388	0.313433	0.462687	0.641791	0.985075	0.231343	0.315789	0.022388	0.119403	0.462687	0.873134	0.985075	0.320896
0.315657	0.434343	0.25	0.247788	0.166877	0.19469	0.002525	0.261364	0.503788	0.794192	0.998737	0.010101	0.207071	0.440657	0.70202	0.996212	0.001263	0.316919	0.57702	0.770202	1	0.714646	0.068182	0.217172	0.036662	0.061947	0.001264	0.001263	0.228535	0.44697	0.664141	1	0.003788	0.308081	0.578283	0.632576	0.972222	0.011364	0.368687	0.733586	0.838384	0.988636	0.400253	0.364096	0.003788	0.255051	0.536616	0.717172	0.994949	0.454545
0.268063	0.482723	0.249215	0.243187	0.167715	0.228512	0.004188	0.25445	0.546597	0.793717	0.996859	0.002094	0.250262	0.486911	0.735079	0.998953	0.001047	0.240838	0.478534	0.739267	1	0.532984	0.396859	0.070157	0.156184	0.015723	0.003145	0.001047	0.259686	0.490052	0.724607	1	0.046073	0.271204	0.526702	0.816754	0.998953	0.011518	0.031414	0.202094	0.696335	0.714136	0.707853	0.264151	0.012565	0.218848	0.439791	0.73089	0.997906	0.487958
0.326679	0.372051	0.30127	0.274545	0.203636	0.223636	0.016334	0.274047	0.513612	0.758621	1	0.00363	0.221416	0.479129	0.722323	0.989111	0.001815	0.255898	0.511797	0.760436	0.99637	0.470054	0.179673	0.350272	0.092727	0.103636	0.001818	0.001815	0.246824	0.462795	0.751361	1	0.023593	0.235935	0.522686	0.903811	0.998185	0.012704	0.319419	0.508167	0.711434	0.860254	0.611615	0.345455	0.012704	0.235935	0.491833	0.727768	0.99637	0.370236
0.343333	0.32	0.336667	0.173913	0.247492	0.227425	0.01	0.246667	0.513333	0.756667	0.99	0.023333	0.24	0.446667	0.723333	0.996667	0.003333	0.243333	0.51	0.75	1	0.383333	0.223333	0.393333	0.080268	0.060201	0	0.003333	0.166667	0.42	0.676667	1	0.006667	0.103333	0.466667	0.816667	0.986667	0.173333	0.343333	0.626667	0.733333	0.91	0.626667	0.354515	0.006667	0.27	0.463333	0.716667	0.976667	0.33
0.390728	0.225166	0.384106	0.126667	0.313333	0.246667	0.033113	0.218543	0.490066	0.774834	0.993377	0.013245	0.298013	0.483444	0.629139	0.986755	0.006623	0.225166	0.496689	0.754967	1	0.350993	0.364238	0.284768	0.1	0.046667	0.006667	0.006623	0.291391	0.476821	0.642384	1	0.145695	0.251656	0.688742	0.827815	0.986755	0.02649	0.086093	0.357616	0.596026	0.953642	0.423841	0.533333	0.02649	0.245033	0.483444	0.675497	0.986755	0.324503
0.319756	0.415479	0.264766	0.254842	0.175331	0.216106	0.003055	0.191446	0.462322	0.718941	0.998982	0.002037	0.316701	0.575356	0.795316	0.995927	0.001018	0.217923	0.417515	0.678208	1	0.642566	0.065173	0.292261	0.040775	0.061162	0.002039	0.001018	0.389002	0.599796	0.788187	1	0.194501	0.302444	0.392057	0.664969	0.868635	0.022403	0.120163	0.236253	0.473523	0.98778	0.439919	0.379205	0.005092	0.224033	0.398167	0.667006	0.989817	0.459267
0.331675	0.320066	0.348259	0.182724	0.234219	0.219269	0.008292	0.321725	0.527363	0.772803	1	0.006633	0.175788	0.434494	0.68325	0.993367	0.001658	0.260365	0.502488	0.781095	0.998342	0.391376	0.243781	0.364842	0.101329	0.054817	0.008306	0.001658	0.218905	0.484245	0.759536	1	0.00995	0.210614	0.412935	0.756219	0.998342	0.023217	0.339967	0.507463	0.706468	0.958541	0.626866	0.408638	0.004975	0.243781	0.502488	0.751244	0.995025	0.333333
0.295455	0.371212	0.333333	0.221374	0.175573	0.305344	0.143939	0.363636	0.515152	0.674242	0.992424	0.022727	0.181818	0.409091	0.727273	1	0.007576	0.189394	0.530303	0.772727	0.977273	0.568182	0.022727	0.409091	0.015267	0.183206	0.015267	0.007576	0.257576	0.606061	0.787879	1	0.825758	0.825758	0.825758	0.886364	0.893939	0.015152	0.106061	0.44697	0.545455	0.863636	0.492424	0.351145	0.022727	0.136364	0.356061	0.765152	0.977273	0.469697
0.288608	0.356962	0.35443	0.177665	0.187817	0.269036	0.010127	0.291139	0.567089	0.78481	0.987342	0.005063	0.177215	0.498734	0.718987	0.997468	0.002532	0.24557	0.468354	0.713924	1	0.425316	0.207595	0.367089	0.071066	0.06599	0.005076	0.002532	0.24557	0.56962	0.792405	1	0.124051	0.425316	0.518987	0.739241	0.949367	0.012658	0.187342	0.336709	0.648101	0.977215	0.625316	0.370558	0.012658	0.293671	0.478481	0.701266	0.994937	0.377215
0.325991	0.374449	0.299559	0.252212	0.207965	0.212389	0.026432	0.303965	0.546256	0.757709	0.977974	0.008811	0.167401	0.462555	0.770925	1	0.004405	0.237885	0.449339	0.674009	0.991189	0.374449	0.167401	0.45815	0.106195	0.070796	0.00885	0.004405	0.277533	0.515419	0.687225	1	0.039648	0.15859	0.502203	0.612335	0.960352	0.088106	0.242291	0.440529	0.779736	0.938326	0.409692	0.433628	0.035242	0.185022	0.418502	0.656388	0.951542	0.378855
0.416667	0.27451	0.308824	0.197044	0.26601	0.152709	0.009804	0.313725	0.539216	0.764706	0.995098	0.029412	0.191176	0.480392	0.676471	1	0.004902	0.196078	0.465686	0.710784	0.980392	0.333333	0.132353	0.534314	0.049261	0.08867	0	0.004902	0.205882	0.490196	0.72549	1	0.034314	0.058824	0.455882	0.651961	0.882353	0.093137	0.318627	0.514706	0.784314	0.985294	0.563725	0.394089	0.029412	0.235294	0.460784	0.661765	0.980392	0.303922
0.342569	0.440806	0.216625	0.305556	0.174242	0.189394	0.010076	0.2267	0.493703	0.780856	0.989924	0.005038	0.264484	0.498741	0.697733	0.997481	0.002519	0.216625	0.501259	0.778338	1	0.717884	0.030227	0.251889	0.017677	0.068182	0.007576	0.002519	0.239295	0.450882	0.690176	1	0.062972	0.06801	0.196474	0.528967	0.93199	0.012594	0.319899	0.629723	0.808564	0.97733	0.342569	0.363636	0.015113	0.299748	0.531486	0.823678	0.97733	0.476071
0.327526	0.337979	0.334495	0.192308	0.244755	0.269231	0.020906	0.254355	0.501742	0.752613	1	0.010453	0.243902	0.491289	0.766551	0.996516	0.003484	0.236934	0.494774	0.696864	0.97561	0.439024	0.149826	0.41115	0.062937	0.06993	0	0.003484	0.170732	0.428571	0.71777	1	0.02439	0.226481	0.515679	0.721254	0.860627	0.083624	0.313589	0.498258	0.811847	0.982578	0.609756	0.41958	0.02439	0.25784	0.512195	0.71777	0.989547	0.358885
0.392857	0.339286	0.267857	0.243728	0.18638	0.193548	0.007143	0.214286	0.489286	0.839286	0.996429	0.021429	0.196429	0.435714	0.692857	0.992857	0.003571	0.357143	0.532143	0.732143	1	0.528571	0.2	0.271429	0.075269	0.075269	0.02509	0.003571	0.171429	0.328571	0.775	1	0.117857	0.403571	0.542857	0.65	0.989286	0.025	0.385714	0.582143	0.735714	0.9	0.475	0.272401	0.010714	0.364286	0.485714	0.664286	0.982143	0.378571
0.372549	0.392157	0.235294	0.3	0.12	0.22	0.039216	0.176471	0.607843	0.823529	1	0.058824	0.294118	0.509804	0.666667	0.980392	0.019608	0.117647	0.313725	0.529412	0.882353	0.509804	0.294118	0.196078	0.12	0.04	0	0.019608	0.176471	0.411765	0.666667	1	0.058824	0.098039	0.294118	0.509804	0.588235	0.745098	0.764706	0.823529	0.862745	0.921569	0.45098	0.32	0.078431	0.254902	0.431373	0.568627	0.882353	0.411765
0.319865	0.360269	0.319865	0.236088	0.215852	0.192243	0.023569	0.223906	0.52862	0.779461	0.998316	0.003367	0.239057	0.47138	0.69697	0.994949	0.001684	0.282828	0.520202	0.762626	1	0.429293	0.106061	0.464646	0.043845	0.091062	0	0.001684	0.153199	0.409091	0.708754	1	0.415825	0.572391	0.686869	0.867003	0.961279	0.050505	0.287879	0.459596	0.772727	0.996633	0.614478	0.320405	0.015152	0.326599	0.518519	0.727273	0.994949	0.378788
0.280952	0.419048	0.3	0.272727	0.167464	0.263158	0.014286	0.209524	0.419048	0.766667	0.995238	0.009524	0.266667	0.519048	0.733333	0.971429	0.004762	0.195238	0.514286	0.719048	1	0.52381	0.147619	0.328571	0.057416	0.086124	0	0.004762	0.27619	0.504762	0.752381	1	0.014286	0.042857	0.385714	0.57619	0.852381	0.066667	0.257143	0.628571	0.904762	0.990476	0.62381	0.325359	0.019048	0.333333	0.557143	0.719048	0.985714	0.419048
0.28	0.426667	0.293333	0.189189	0.256757	0.27027	0.146667	0.266667	0.586667	0.773333	1	0.026667	0.2	0.44	0.706667	0.946667	0.013333	0.16	0.493333	0.693333	0.986667	0.826667	0.16	0.013333	0.081081	0.027027	0	0.013333	0.2	0.546667	0.786667	1	0.36	0.386667	0.48	0.52	0.733333	0.693333	0.693333	0.693333	0.693333	0.693333	0.36	0.513514	0.053333	0.24	0.493333	0.693333	0.986667	0.626667
0.289926	0.407862	0.302211	0.256158	0.187192	0.23399	0.004914	0.265356	0.498771	0.742015	0.985258	0.012285	0.228501	0.464373	0.751843	1	0.002457	0.260442	0.525799	0.737101	0.977887	0.46683	0.331695	0.201474	0.12069	0.022167	0.002463	0.002457	0.19656	0.523342	0.761671	1	0.103194	0.326781	0.609337	0.815725	0.965602	0.004914	0.051597	0.422604	0.479115	0.813268	0.469287	0.369458	0.009828	0.230958	0.513514	0.732187	0.960688	0.44226
0.350515	0.337629	0.311856	0.198966	0.242894	0.224806	0.005155	0.231959	0.528351	0.716495	1	0.007732	0.244845	0.484536	0.796392	0.989691	0.002577	0.255155	0.463918	0.71134	0.997423	0.340206	0.216495	0.443299	0.069767	0.069767	0.002584	0.002577	0.224227	0.438144	0.675258	1	0.051546	0.126289	0.296392	0.541237	0.992268	0.007732	0.368557	0.621134	0.765464	0.951031	0.603093	0.387597	0.007732	0.244845	0.451031	0.731959	0.997423	0.350515
0.292208	0.435065	0.272727	0.30719	0.150327	0.215686	0.045455	0.227273	0.422078	0.753247	0.993506	0.012987	0.168831	0.5	0.714286	0.980519	0.006494	0.305195	0.538961	0.772727	1	0.441558	0.396104	0.162338	0.124183	0.071895	0.006536	0.006494	0.24026	0.538961	0.649351	1	0.155844	0.337662	0.493506	0.74026	0.909091	0.019481	0.051948	0.12987	0.928571	0.980519	0.506494	0.405229	0.032468	0.318182	0.506494	0.746753	0.967532	0.383117
0.356293	0.410144	0.233563	0.322682	0.160401	0.199875	0.001252	0.235441	0.480276	0.745773	1	0.006262	0.233563	0.508453	0.760175	0.998748	0.000626	0.286788	0.506575	0.740138	0.999374	0.517846	0.297433	0.184721	0.130952	0.040727	0.004386	0.000626	0.220413	0.450219	0.692549	1	0.003131	0.506575	0.742016	0.87226	0.997495	0.005009	0.192862	0.305573	0.458359	0.6268	0.567314	0.33584	0.003131	0.318723	0.544771	0.777082	0.996869	0.422668
0.232365	0.431535	0.3361	0.229167	0.158333	0.2625	0.078838	0.278008	0.543568	0.813278	1	0.008299	0.244813	0.456432	0.692946	0.975104	0.004149	0.224066	0.510373	0.763485	0.991701	0.431535	0.190871	0.377593	0.083333	0.083333	0	0.004149	0.20332	0.46473	0.726141	1	0.033195	0.219917	0.477178	0.643154	0.937759	0.020747	0.294606	0.539419	0.788382	0.991701	0.589212	0.383333	0.020747	0.232365	0.502075	0.742739	0.991701	0.473029
0.139535	0.48062	0.379845	0.179688	0.054688	0.273438	0.023256	0.333333	0.589147	0.736434	0.945736	0.03876	0.209302	0.465116	0.713178	0.96124	0.007752	0.255814	0.51938	0.782946	1	0.542636	0.131783	0.325581	0.054688	0.085938	0.007812	0.007752	0.372093	0.604651	0.744186	1	0.325581	0.775194	0.806202	0.837209	0.992248	0.015504	0.162791	0.248062	0.48062	0.573643	0.472868	0.34375	0.031008	0.263566	0.51938	0.767442	0.984496	0.511628
0.301418	0.398936	0.299645	0.241563	0.184725	0.264654	0.005319	0.271277	0.505319	0.758865	0.998227	0.010638	0.212766	0.508865	0.748227	1	0.001773	0.264184	0.48227	0.72695	0.989362	0.342199	0.067376	0.590426	0.031972	0.095915	0	0.001773	0.27305	0.560284	0.856383	1	0.306738	0.578014	0.725177	0.789007	0.91844	0.012411	0.20922	0.429078	0.68617	0.98227	0.601064	0.380107	0.008865	0.257092	0.475177	0.725177	0.991135	0.432624
0.376254	0.376254	0.247492	0.268007	0.224456	0.180905	0.008361	0.294314	0.489967	0.727425	0.998328	0.003344	0.198997	0.454849	0.712375	0.979933	0.001672	0.319398	0.575251	0.807692	1	0.361204	0.003344	0.635452	0.00335	0.117253	0	0.001672	0.157191	0.351171	0.645485	1	0.489967	0.489967	0.489967	0.489967	0.491639	0.026756	0.337793	0.575251	0.780936	0.994983	0.43311	0.438861	0.005017	0.282609	0.580268	0.785953	0.996656	0.392977
0.338624	0.305115	0.356261	0.220848	0.242049	0.19788	0.007055	0.215168	0.47619	0.710758	0.982363	0.003527	0.261023	0.458554	0.738977	1	0.001764	0.289242	0.544974	0.784832	0.998236	0.409171	0.130511	0.460317	0.063604	0.077739	0	0.001764	0.312169	0.550265	0.834215	1	0.008818	0.467372	0.560847	0.784832	0.998236	0.038801	0.17284	0.333333	0.693122	0.984127	0.536155	0.40636	0.037037	0.289242	0.527337	0.765432	0.996473	0.343915
0.275701	0.415888	0.308411	0.206573	0.159624	0.323944	0.009346	0.238318	0.434579	0.724299	0.976636	0.014019	0.233645	0.546729	0.771028	1	0.004673	0.257009	0.46729	0.719626	0.96729	0.457944	0.168224	0.373832	0.075117	0.084507	0	0.004673	0.21028	0.584112	0.752336	1	0.03271	0.172897	0.411215	0.616822	0.88785	0.098131	0.271028	0.46729	0.742991	0.981308	0.579439	0.413146	0.023364	0.28972	0.518692	0.733645	0.96729	0.453271
0.303103	0.343675	0.353222	0.205742	0.220096	0.239234	0.02148	0.26253	0.5179	0.782816	0.997613	0.004773	0.169451	0.47494	0.727924	0.99284	0.002387	0.295943	0.491647	0.747017	1	0.508353	0.128878	0.362768	0.050239	0.083732	0.007177	0.002387	0.24821	0.520286	0.811456	1	0.078759	0.116945	0.159905	0.305489	0.49642	0.207637	0.389021	0.599045	0.749403	0.947494	0.527446	0.37799	0.00716	0.264916	0.47494	0.646778	0.995227	0.357995
0.30303	0.358289	0.338681	0.217857	0.2125	0.232143	0.019608	0.254902	0.534759	0.786096	1	0.005348	0.286988	0.540107	0.761141	0.994652	0.001783	0.208556	0.440285	0.700535	0.996435	0.406417	0.165775	0.427807	0.064286	0.092857	0	0.001783	0.270945	0.461676	0.748663	1	0.005348	0.110517	0.238859	0.352941	0.743316	0.024955	0.42246	0.618538	0.823529	0.996435	0.636364	0.360714	0.003565	0.238859	0.481283	0.720143	0.996435	0.345811
0.272059	0.419118	0.308824	0.214815	0.2	0.244444	0.044118	0.169118	0.455882	0.661765	0.992647	0.022059	0.272059	0.529412	0.779412	0.955882	0.007353	0.235294	0.463235	0.720588	1	0.382353	0.301471	0.316176	0.088889	0.059259	0	0.007353	0.205882	0.411765	0.823529	1	0.257353	0.360294	0.455882	0.727941	0.985294	0.073529	0.139706	0.566176	0.647059	0.816176	0.492647	0.37037	0.022059	0.286765	0.455882	0.698529	0.970588	0.411765
0.372642	0.240566	0.386792	0.170616	0.255924	0.189573	0.009434	0.311321	0.580189	0.783019	0.995283	0.066038	0.240566	0.433962	0.679245	0.938679	0.004717	0.193396	0.45283	0.712264	1	0.339623	0.103774	0.556604	0.056872	0.085308	0	0.004717	0.183962	0.391509	0.783019	1	0.113208	0.193396	0.358491	0.816038	0.853774	0.014151	0.301887	0.528302	0.726415	0.990566	0.523585	0.398104	0.018868	0.212264	0.448113	0.731132	0.971698	0.226415
0.272321	0.397321	0.330357	0.179372	0.233184	0.255605	0.026786	0.232143	0.535714	0.803571	0.973214	0.008929	0.236607	0.473214	0.6875	1	0.004464	0.254464	0.486607	0.75	0.995536	0.370536	0.263393	0.366071	0.098655	0.098655	0.008969	0.004464	0.151786	0.357143	0.549107	1	0.053571	0.25	0.464286	0.691964	0.879464	0.102679	0.379464	0.714286	0.901786	0.995536	0.584821	0.421525	0.049107	0.294643	0.504464	0.741071	0.995536	0.410714
0.262751	0.506955	0.230294	0.272446	0.125387	0.25387	0.006182	0.251932	0.488408	0.785162	1	0.003091	0.242658	0.493045	0.741886	0.996909	0.001546	0.262751	0.514683	0.721793	0.993818	0.513138	0.440495	0.046368	0.154799	0.01548	0	0.001546	0.238022	0.455951	0.710974	1	0.078825	0.324575	0.567233	0.777434	0.996909	0.018547	0.027821	0.040185	0.50541	0.785162	0.578053	0.374613	0.004637	0.231839	0.474498	0.721793	0.996909	0.520866
0.318333	0.468333	0.213333	0.283806	0.126878	0.230384	0.003333	0.231667	0.488333	0.736667	0.998333	0.015	0.25	0.471667	0.733333	0.993333	0.001667	0.273333	0.541667	0.793333	1	0.758333	0.075	0.166667	0.040067	0.053422	0.006678	0.001667	0.211667	0.433333	0.665	1	0.053333	0.388333	0.578333	0.716667	0.923333	0.008333	0.486667	0.793333	0.906667	0.996667	0.37	0.353923	0.021667	0.395	0.598333	0.798333	0.995	0.516667
0.321053	0.363158	0.315789	0.216931	0.216931	0.206349	0.015789	0.284211	0.489474	0.747368	0.989474	0.010526	0.194737	0.421053	0.636842	0.978947	0.005263	0.252632	0.557895	0.773684	1	0.389474	0.247368	0.363158	0.074074	0.074074	0	0.005263	0.163158	0.436842	0.773684	1	0.021053	0.363158	0.536842	0.615789	0.9	0.057895	0.257895	0.478947	0.8	0.968421	0.547368	0.412698	0.021053	0.294737	0.536842	0.794737	0.994737	0.373684
0.173684	0.297368	0.528947	0.102902	0.171504	0.335092	0.013158	0.307895	0.555263	0.744737	0.997368	0.005263	0.265789	0.534211	0.776316	0.976316	0.002632	0.218421	0.460526	0.7	1	0.139474	0.057895	0.802632	0.01847	0.050132	0.007916	0.002632	0.392105	0.636842	0.721053	1	0.397368	0.407895	0.723684	0.75	0.765789	0.007895	0.221053	0.473684	0.789474	0.997368	0.715789	0.248021	0.007895	0.231579	0.515789	0.784211	0.992105	0.239474
0.326425	0.36658	0.306995	0.236057	0.206226	0.236057	0.003886	0.229275	0.466321	0.704663	1	0.002591	0.273316	0.505181	0.768135	0.996114	0.001295	0.243523	0.525907	0.770725	0.998705	0.393782	0.132124	0.474093	0.051881	0.088197	0.007782	0.001295	0.168394	0.426166	0.686528	1	0.006477	0.161917	0.5	0.611399	0.909326	0.027202	0.312176	0.551813	0.82772	0.997409	0.567358	0.386511	0.006477	0.255181	0.541451	0.765544	0.997409	0.380829
0.264993	0.354254	0.380753	0.184358	0.209497	0.261173	0.006974	0.198047	0.458856	0.704324	0.991632	0.002789	0.246862	0.517434	0.753138	1	0.001395	0.284519	0.51046	0.764296	0.998605	0.390516	0.171548	0.437936	0.062849	0.068436	0.001397	0.001395	0.191074	0.485356	0.76569	1	0.061367	0.252441	0.331939	0.824268	0.951185	0.002789	0.361227	0.51325	0.672245	0.998605	0.64993	0.354749	0.004184	0.262204	0.502092	0.732218	0.998605	0.324965
0.308036	0.34375	0.348214	0.192825	0.219731	0.282511	0.017857	0.263393	0.53125	0.754464	0.995536	0.013393	0.223214	0.433036	0.700893	0.986607	0.004464	0.276786	0.46875	0.741071	1	0.450893	0.205357	0.34375	0.107623	0.071749	0	0.004464	0.1875	0.397321	0.821429	1	0.049107	0.107143	0.272321	0.558036	0.991071	0.196429	0.428571	0.616071	0.714286	0.955357	0.647321	0.394619	0.022321	0.272321	0.464286	0.709821	0.991071	0.299107
0.328455	0.373984	0.297561	0.187296	0.20684	0.236156	0.00813	0.252033	0.411382	0.653659	0.996748	0.003252	0.214634	0.526829	0.760976	0.998374	0.001626	0.312195	0.565854	0.777236	1	0.403252	0.037398	0.55935	0.027687	0.086319	0.004886	0.001626	0.23252	0.499187	0.730081	1	0.004878	0.011382	0.026016	0.266667	0.830894	0.039024	0.315447	0.547967	0.780488	0.996748	0.461789	0.384365	0.006504	0.237398	0.578862	0.796748	0.98374	0.398374
0.351464	0.338912	0.309623	0.214286	0.256303	0.180672	0.012552	0.251046	0.493724	0.782427	0.991632	0.008368	0.238494	0.48954	0.74477	0.995816	0.004184	0.246862	0.502092	0.698745	1	0.447699	0.205021	0.34728	0.07563	0.084034	0.008403	0.004184	0.213389	0.468619	0.748954	1	0.012552	0.158996	0.443515	0.67364	0.962343	0.079498	0.297071	0.531381	0.807531	0.987448	0.564854	0.436975	0.012552	0.200837	0.464435	0.728033	0.987448	0.364017
0.276817	0.404844	0.318339	0.208333	0.173611	0.309028	0.027682	0.245675	0.595156	0.778547	0.986159	0.00692	0.228374	0.49827	0.719723	1	0.00346	0.262976	0.463668	0.723183	0.99308	0.567474	0.221453	0.211073	0.076389	0.048611	0.013889	0.00346	0.366782	0.602076	0.82699	1	0.031142	0.294118	0.422145	0.577855	0.961938	0.048443	0.096886	0.238754	0.615917	0.740484	0.519031	0.402778	0.010381	0.273356	0.456747	0.653979	0.99308	0.422145
0.375	0.25	0.375	0.264368	0.195402	0.172414	0.204545	0.443182	0.613636	0.75	0.988636	0.022727	0.261364	0.454545	0.704545	0.954545	0.011364	0.113636	0.238636	0.534091	1	0.272727	0	0.727273	0	0.045977	0	0.011364	0.670455	0.863636	0.931818	1	0	0	0	0	0	0.022727	0.193182	0.375	0.556818	0.840909	0.318182	0.344828	0.034091	0.284091	0.511364	0.806818	0.977273	0.193182
0.252841	0.451705	0.295455	0.236467	0.139601	0.282051	0.019886	0.247159	0.502841	0.815341	0.988636	0.005682	0.25	0.488636	0.71875	0.994318	0.002841	0.230114	0.494318	0.741477	1	0.321023	0.119318	0.559659	0.05698	0.096866	0	0.002841	0.255682	0.414773	0.764205	1	0.014205	0.107955	0.261364	0.355114	0.940341	0.056818	0.301136	0.590909	0.769886	0.988636	0.65625	0.330484	0.019886	0.284091	0.474432	0.707386	0.991477	0.423295
0.343239	0.457652	0.199108	0.303571	0.147321	0.205357	0.004458	0.245171	0.534918	0.77266	1	0.002972	0.254086	0.46211	0.728083	0.998514	0.001486	0.228826	0.518574	0.738484	0.997028	0.7474	0.069837	0.182764	0.041667	0.056548	0	0.001486	0.239227	0.485884	0.725111	1	0.040119	0.213967	0.322437	0.410104	0.863299	0.005944	0.460624	0.655275	0.845468	0.962853	0.43685	0.404762	0.008915	0.213967	0.420505	0.686478	0.997028	0.502229
0.291667	0.491667	0.216667	0.285714	0.176471	0.218487	0.025	0.341667	0.525	0.7	1	0.016667	0.183333	0.4	0.775	0.991667	0.008333	0.233333	0.516667	0.683333	0.875	0.441667	0.041667	0.516667	0.033613	0.084034	0	0.008333	0.383333	0.733333	0.875	1	0.033333	0.033333	0.783333	0.791667	0.808333	0.075	0.216667	0.35	0.533333	0.958333	0.575	0.369748	0.033333	0.2	0.4	0.658333	0.958333	0.541667
0.394286	0.291429	0.314286	0.206897	0.218391	0.212644	0.011429	0.222857	0.44	0.691429	0.988571	0.04	0.32	0.6	0.777143	1	0.005714	0.171429	0.48	0.702857	0.994286	0.44	0.131429	0.428571	0.045977	0.068966	0	0.005714	0.365714	0.497143	0.777143	1	0.017143	0.04	0.257143	0.405714	0.588571	0.114286	0.297143	0.64	0.765714	0.954286	0.497143	0.287356	0.017143	0.257143	0.548571	0.737143	0.988571	0.32
0.223242	0.513761	0.262997	0.193252	0.134969	0.266871	0.012232	0.363914	0.599388	0.7737	1	0.006116	0.198777	0.385321	0.681957	0.984709	0.003058	0.366972	0.568807	0.767584	0.996942	0.651376	0.223242	0.125382	0.079755	0.030675	0	0.003058	0.232416	0.409786	0.737003	1	0.293578	0.623853	0.715596	0.892966	0.993884	0.018349	0.045872	0.076453	0.562691	0.611621	0.59633	0.294479	0.027523	0.29052	0.480122	0.712538	0.996942	0.535168
0.303614	0.378313	0.318072	0.205314	0.178744	0.28744	0.012048	0.236145	0.489157	0.773494	1	0.004819	0.238554	0.46747	0.720482	0.995181	0.00241	0.26506	0.518072	0.759036	0.987952	0.450602	0.253012	0.296386	0.091787	0.057971	0.004831	0.00241	0.185542	0.424096	0.679518	1	0.014458	0.122892	0.436145	0.766265	0.990361	0.166265	0.395181	0.612048	0.787952	0.978313	0.549398	0.434783	0.016867	0.293976	0.559036	0.773494	0.987952	0.409639
0.323176	0.377706	0.299118	0.253612	0.195827	0.228732	0.002406	0.243785	0.510024	0.761026	0.999198	0.001604	0.222133	0.479551	0.729751	1	0.000802	0.280674	0.510826	0.757017	0.996792	0.459503	0.172414	0.368083	0.089888	0.077047	0.001605	0.000802	0.184443	0.432237	0.688853	1	0.004812	0.27506	0.573376	0.790698	0.98316	0.044908	0.336808	0.522855	0.785886	0.997594	0.548516	0.380417	0.00401	0.268645	0.479551	0.747394	0.993585	0.37931
0.465753	0.219178	0.315068	0.125	0.458333	0.083333	0.027397	0.178082	0.465753	0.643836	0.917808	0.260274	0.657534	0.849315	0.945205	1	0.013699	0.150685	0.342466	0.575342	0.835616	0.287671	0	0.712329	0	0.027778	0	0.013699	0.780822	0.849315	0.917808	1	0	0	0	0	0	0.054795	0.219178	0.39726	0.575342	0.753425	0.342466	0.444444	0.09589	0.273973	0.424658	0.589041	0.835616	0.219178
0.330893	0.358712	0.310395	0.230205	0.209677	0.217009	0.010249	0.229868	0.510981	0.775988	0.997072	0.002928	0.295754	0.50366	0.732064	1	0.001464	0.234261	0.462665	0.746706	0.998536	0.556369	0.15959	0.284041	0.064516	0.067449	0.008798	0.001464	0.29429	0.550512	0.692533	1	0.064422	0.158126	0.718887	0.786237	0.95022	0.055637	0.225476	0.399707	0.827233	0.991215	0.489019	0.322581	0.002928	0.247438	0.486091	0.783309	0.989751	0.363104
0.337194	0.43758	0.225225	0.235825	0.170103	0.197165	0.003861	0.211068	0.441441	0.660232	1	0.002574	0.34749	0.561133	0.826255	0.997426	0.001287	0.172458	0.409266	0.673102	0.998713	0.539254	0.034749	0.425997	0.021907	0.055412	0.003866	0.001287	0.307593	0.509653	0.841699	1	0.212355	0.232947	0.2574	0.271557	0.997426	0.010296	0.144144	0.43758	0.630631	0.992278	0.387387	0.389175	0.005148	0.225225	0.558559	0.779923	0.998713	0.423423
0.218597	0.417618	0.363785	0.179739	0.137255	0.336601	0.013051	0.230016	0.597064	0.836868	0.998369	0.003263	0.278956	0.522023	0.734095	0.995106	0.001631	0.231648	0.433931	0.698206	1	0.352365	0.057096	0.590538	0.027778	0.060458	0.004902	0.001631	0.323002	0.737357	0.838499	1	0.008157	0.30832	0.476346	0.776509	0.978793	0.021207	0.212072	0.412724	0.616639	0.95106	0.769984	0.179739	0.006525	0.244698	0.468189	0.698206	0.990212	0.391517
0.359168	0.340265	0.300567	0.236742	0.217803	0.1875	0.009452	0.275992	0.555766	0.763705	0.996219	0.005671	0.226843	0.487713	0.731569	0.990548	0.00189	0.234405	0.480151	0.73724	1	0.555766	0.376181	0.068053	0.140152	0.015152	0.007576	0.00189	0.26276	0.491493	0.733459	1	0.003781	0.221172	0.463138	0.627599	0.992439	0.120983	0.778828	0.795841	0.826087	0.984877	0.604915	0.340909	0.003781	0.266541	0.485822	0.778828	0.994329	0.36673
0.162011	0.444134	0.393855	0.140056	0.117647	0.35014	0.005587	0.217877	0.430168	0.709497	0.98324	0.019553	0.226257	0.497207	0.731844	1	0.002793	0.27095	0.505587	0.765363	0.997207	0.265363	0.01676	0.717877	0.011204	0.072829	0	0.002793	0.215084	0.430168	0.698324	1	0.410615	0.410615	0.416201	0.709497	0.715084	0.005587	0.25419	0.513966	0.768156	0.994413	0.740223	0.173669	0.011173	0.273743	0.513966	0.726257	0.988827	0.435754
0.418502	0.334802	0.246696	0.292035	0.252212	0.150442	0.026432	0.242291	0.462555	0.753304	1	0.008811	0.290749	0.511013	0.748899	0.973568	0.004405	0.176211	0.484581	0.731278	0.991189	0.110132	0	0.889868	0	0.053097	0	0.004405	0.356828	0.709251	0.911894	1	0	0	0	0	0	0.013216	0.242291	0.480176	0.722467	0.986784	0.374449	0.504425	0.013216	0.193833	0.45815	0.687225	0.982379	0.387665
0.366464	0.311021	0.322515	0.221922	0.228011	0.223275	0.002028	0.250169	0.509804	0.757945	1	0.001352	0.233266	0.494929	0.738337	0.995267	0.000676	0.265044	0.486815	0.753888	0.999324	0.4476	0.210277	0.342123	0.083897	0.062246	0.001353	0.000676	0.266396	0.51927	0.749155	1	0.002028	0.105477	0.415822	0.706558	0.998648	0.075727	0.2833	0.517918	0.759297	0.968222	0.59432	0.368065	0.002028	0.269777	0.495605	0.752535	0.999324	0.313049
0.384906	0.299371	0.315723	0.200252	0.260705	0.193955	0.006289	0.244025	0.43522	0.700629	0.996226	0.002516	0.316981	0.543396	0.798742	1	0.001258	0.21761	0.504403	0.752201	0.998742	0.338365	0.161006	0.500629	0.055416	0.083123	0	0.001258	0.231447	0.554717	0.768553	1	0.005031	0.122013	0.559748	0.803774	0.983648	0.037736	0.271698	0.428931	0.703145	0.997484	0.562264	0.395466	0.006289	0.262893	0.528302	0.781132	0.998742	0.319497
0.28882	0.381988	0.329193	0.211838	0.199377	0.23676	0.006211	0.164596	0.400621	0.729814	0.990683	0.009317	0.236025	0.506211	0.714286	0.993789	0.003106	0.310559	0.562112	0.773292	1	0.428571	0.086957	0.484472	0.034268	0.096573	0.003115	0.003106	0.208075	0.357143	0.590062	1	0.080745	0.118012	0.276398	0.332298	0.726708	0.02795	0.437888	0.63354	0.850932	0.996894	0.5	0.386293	0.018634	0.338509	0.583851	0.748447	0.987578	0.413043
0.267925	0.420755	0.311321	0.236295	0.177694	0.287335	0.015094	0.24717	0.533962	0.773585	1	0.001887	0.222642	0.477358	0.690566	0.988679	0.007547	0.264151	0.498113	0.786792	0.998113	0.454717	0.011321	0.533962	0.011342	0.075614	0	0.001887	0.213208	0.458491	0.724528	1	0.356604	0.356604	0.528302	0.530189	0.877358	0.064151	0.256604	0.503774	0.781132	0.99434	0.792453	0.234405	0.009434	0.267925	0.507547	0.749057	0.996226	0.426415
0.284507	0.402817	0.312676	0.231638	0.172316	0.276836	0.011268	0.35493	0.569014	0.811268	1	0.005634	0.185915	0.439437	0.707042	0.994366	0.002817	0.267606	0.447887	0.709859	0.991549	0.594366	0.166197	0.239437	0.067797	0.050847	0	0.002817	0.174648	0.346479	0.690141	1	0.061972	0.642254	0.709859	0.819718	0.926761	0.025352	0.377465	0.467606	0.625352	0.991549	0.602817	0.361582	0.008451	0.287324	0.532394	0.735211	0.991549	0.408451
0.318945	0.344125	0.33693	0.228091	0.220888	0.217287	0.005995	0.236211	0.517986	0.800959	0.995204	0.002398	0.293765	0.507194	0.756595	1	0.001199	0.238609	0.460432	0.697842	0.997602	0.354916	0.044365	0.600719	0.028812	0.098439	0.002401	0.001199	0.285372	0.538369	0.823741	1	0.003597	0.171463	0.284173	0.856115	0.998801	0.016787	0.226619	0.476019	0.689448	0.976019	0.556355	0.379352	0.003597	0.247002	0.48801	0.685851	0.997602	0.360911
0.299435	0.370056	0.330508	0.1983	0.235127	0.243626	0.00565	0.254237	0.570621	0.793785	1	0.008475	0.276836	0.437853	0.70339	0.991525	0.002825	0.194915	0.471751	0.731638	0.997175	0.454802	0.129944	0.415254	0.048159	0.065156	0.002833	0.002825	0.29661	0.59322	0.788136	1	0.432203	0.776836	0.920904	0.954802	0.99435	0.014124	0.166667	0.327684	0.531073	0.680791	0.539548	0.351275	0.014124	0.217514	0.440678	0.666667	0.997175	0.418079
0.1875	0.375	0.4375	0.164557	0.151899	0.392405	0.025	0.0875	0.25	0.5375	1	0.05	0.225	0.45	0.7375	0.9375	0.0125	0.3	0.5625	0.7875	0.9875	0.15	0	0.85	0	0.075949	0	0.0125	0.0375	0.0875	0.125	1	0	0	0	0	0	0.0625	0.3375	0.5625	0.775	0.9875	0.7125	0.253165	0.0375	0.3625	0.5625	0.75	0.95	0.275
0.294118	0.352941	0.352941	0.184211	0.190789	0.315789	0.019608	0.346405	0.529412	0.686275	1	0.026144	0.222222	0.457516	0.699346	0.986928	0.006536	0.196078	0.509804	0.784314	0.993464	0.51634	0.294118	0.189542	0.092105	0.026316	0	0.006536	0.281046	0.470588	0.666667	1	0.183007	0.346405	0.777778	0.895425	0.986928	0.013072	0.052288	0.098039	0.143791	0.601307	0.555556	0.421053	0.026144	0.183007	0.542484	0.764706	0.973856	0.366013
0.275449	0.431138	0.293413	0.186747	0.162651	0.240964	0.017964	0.257485	0.497006	0.634731	0.964072	0.011976	0.227545	0.556886	0.790419	1	0.005988	0.251497	0.407186	0.658683	0.97006	0.479042	0.197605	0.323353	0.084337	0.072289	0.012048	0.005988	0.275449	0.520958	0.754491	1	0.191617	0.317365	0.479042	0.610778	0.778443	0.023952	0.095808	0.401198	0.856287	0.988024	0.491018	0.373494	0.023952	0.185629	0.42515	0.682635	0.97006	0.473054
0.28483	0.489164	0.226006	0.265116	0.124031	0.175194	0.003096	0.260062	0.512384	0.76935	1	0.006192	0.229102	0.455108	0.701238	0.996904	0.001548	0.272446	0.577399	0.755418	0.993808	0.695046	0.091331	0.213622	0.035659	0.057364	0.007752	0.001548	0.229102	0.472136	0.794118	1	0.01548	0.309598	0.568111	0.613003	0.893189	0.089783	0.275542	0.685759	0.747678	0.99226	0.43808	0.334884	0.009288	0.263158	0.572755	0.772446	0.993808	0.532508
0.262708	0.398111	0.339181	0.194869	0.168317	0.232673	0.00135	0.246964	0.493477	0.737292	1	0.0009	0.260009	0.502024	0.821862	0.998201	0.00045	0.206928	0.506523	0.697706	0.995052	0.491228	0.02969	0.479082	0.016652	0.067957	0.00405	0.00045	0.246514	0.481332	0.846604	1	0.11291	0.145749	0.507872	0.818264	0.895187	0.030139	0.283401	0.528565	0.690058	0.99865	0.581646	0.306031	0.009447	0.222222	0.463338	0.702204	0.995052	0.423752
0.223164	0.466102	0.310734	0.201133	0.127479	0.348442	0.019774	0.299435	0.525424	0.757062	0.99435	0.00565	0.20904	0.474576	0.723164	0.997175	0.002825	0.228814	0.5	0.754237	1	0.59322	0.40678	0	0.15864	0	0	0.002825	0.242938	0.514124	0.745763	1	0.031073	0.274011	0.497175	0.774011	0.983051	0	0	0	0	0	0.683616	0.322946	0.008475	0.274011	0.519774	0.754237	0.988701	0.491525
0.390501	0.229551	0.379947	0.169312	0.285714	0.174603	0.005277	0.229551	0.474934	0.741425	0.994723	0.039578	0.253298	0.511873	0.699208	0.986807	0.002639	0.266491	0.498681	0.759894	1	0.337731	0.102902	0.559367	0.044974	0.07672	0.007937	0.002639	0.208443	0.432718	0.691293	1	0.063325	0.14248	0.411609	0.588391	0.941953	0.015831	0.300792	0.559367	0.762533	0.997361	0.51715	0.433862	0.007916	0.240106	0.493404	0.691293	0.989446	0.248021
0.278378	0.332432	0.389189	0.200542	0.151762	0.249322	0.016216	0.313514	0.513514	0.710811	0.981081	0.005405	0.256757	0.575676	0.764865	0.991892	0.002703	0.178378	0.397297	0.735135	1	0.348649	0.105405	0.545946	0.03794	0.081301	0.00542	0.002703	0.318919	0.551351	0.708108	1	0.008108	0.259459	0.486486	0.697297	0.775676	0.032432	0.17027	0.445946	0.816216	0.997297	0.656757	0.249322	0.008108	0.210811	0.432432	0.732432	0.997297	0.316216
0.162252	0.513245	0.324503	0.142857	0.106312	0.348837	0.006623	0.228477	0.562914	0.864238	1	0.009934	0.218543	0.460265	0.738411	0.990066	0.003311	0.281457	0.513245	0.688742	0.993377	0.509934	0.089404	0.400662	0.016611	0.049834	0.009967	0.003311	0.125828	0.440397	0.784768	1	0.639073	0.655629	0.678808	0.850993	0.943709	0.168874	0.317881	0.453642	0.576159	0.937086	0.682119	0.159468	0.066225	0.36755	0.543046	0.771523	0.993377	0.509934
0.382022	0.370787	0.247191	0.272727	0.147727	0.227273	0.022472	0.404494	0.629213	0.853933	1	0.044944	0.213483	0.382022	0.662921	0.966292	0.011236	0.123596	0.348315	0.539326	0.977528	0.438202	0.202247	0.359551	0.102273	0.079545	0.034091	0.011236	0.314607	0.640449	0.853933	1	0.168539	0.292135	0.370787	0.573034	0.752809	0.022472	0.101124	0.426966	0.786517	0.966292	0.460674	0.318182	0.044944	0.146067	0.258427	0.606742	0.977528	0.359551
0.33121	0.318471	0.350318	0.230769	0.25	0.269231	0.012739	0.312102	0.509554	0.783439	1	0.025478	0.210191	0.496815	0.694268	0.974522	0.006369	0.197452	0.452229	0.738854	0.980892	0.503185	0.165605	0.33121	0.064103	0.064103	0	0.006369	0.165605	0.573248	0.847134	1	0.082803	0.140127	0.273885	0.541401	0.923567	0.178344	0.343949	0.44586	0.700637	0.828025	0.528662	0.461538	0.019108	0.216561	0.433121	0.700637	0.980892	0.324841
0.453642	0.403974	0.142384	0.405316	0.109635	0.112957	0.062914	0.291391	0.549669	0.771523	1	0.006623	0.245033	0.496689	0.738411	0.993377	0.003311	0.043046	0.331126	0.592715	0.956954	0.07947	0.009934	0.910596	0.003322	0.016611	0.003322	0.003311	0.072848	0.092715	0.374172	1	0.056291	0.056291	0.056291	0.059603	0.062914	0.013245	0.281457	0.533113	0.761589	0.990066	0.304636	0.451827	0.013245	0.152318	0.423841	0.668874	0.956954	0.44702
0.28327	0.363118	0.353612	0.209524	0.186667	0.257143	0.011407	0.249049	0.5	0.714829	0.998099	0.013308	0.254753	0.519011	0.785171	1	0.001901	0.237643	0.486692	0.720532	0.988593	0.302281	0.140684	0.557034	0.072381	0.087619	0.00381	0.001901	0.262357	0.509506	0.78327	1	0.009506	0.353612	0.422053	0.606464	0.889734	0.007605	0.220532	0.534221	0.771863	0.990494	0.532319	0.411429	0.009506	0.277567	0.5	0.781369	0.990494	0.389734
0.163701	0.427046	0.409253	0.114286	0.121429	0.378571	0.010676	0.298932	0.523132	0.811388	0.989324	0.007117	0.231317	0.491103	0.743772	0.996441	0.003559	0.220641	0.466192	0.711744	1	0.323843	0	0.676157	0	0.092857	0	0.003559	0.427046	0.615658	0.907473	1	0	0	0	0	0	0.017794	0.206406	0.409253	0.672598	0.918149	0.466192	0.378571	0.035587	0.234875	0.476868	0.711744	0.992883	0.434164
0.317982	0.357456	0.324561	0.230769	0.224176	0.243956	0.008772	0.247807	0.473684	0.752193	1	0.004386	0.287281	0.572368	0.785088	0.993421	0.002193	0.203947	0.429825	0.657895	0.984649	0.532895	0.195175	0.27193	0.068132	0.063736	0.015385	0.002193	0.219298	0.567982	0.815789	1	0.008772	0.287281	0.596491	0.769737	0.934211	0.048246	0.263158	0.407895	0.539474	0.875	0.548246	0.4	0.006579	0.197368	0.436404	0.697368	0.984649	0.355263
0.276873	0.355049	0.368078	0.186275	0.238562	0.30719	0.026059	0.224756	0.527687	0.7557	0.986971	0.006515	0.250814	0.482085	0.716612	1	0.003257	0.247557	0.469055	0.749186	0.996743	0.491857	0.306189	0.201954	0.107843	0.062092	0.003268	0.003257	0.319218	0.498371	0.723127	1	0.107492	0.394137	0.664495	0.889251	0.983713	0.035831	0.081433	0.273616	0.456026	0.986971	0.508143	0.424837	0.013029	0.289902	0.504886	0.703583	0.983713	0.361564
0.303523	0.365854	0.330623	0.233696	0.244565	0.252717	0.01355	0.230352	0.474255	0.739837	0.9729	0.00542	0.246612	0.460705	0.720867	1	0.00271	0.249322	0.552846	0.794038	0.99458	0.409214	0.157182	0.433604	0.067935	0.07337	0.002717	0.00271	0.382114	0.574526	0.785908	1	0.276423	0.544715	0.615176	0.747967	0.872629	0.00813	0.132791	0.252033	0.653117	0.95393	0.579946	0.413043	0.00813	0.327913	0.560976	0.753388	0.99458	0.406504
0.369942	0.248555	0.381503	0.156977	0.284884	0.238372	0.017341	0.17341	0.49711	0.803468	0.982659	0.011561	0.248555	0.427746	0.739884	0.99422	0.00578	0.254335	0.508671	0.728324	1	0.352601	0.213873	0.433526	0.05814	0.081395	0	0.00578	0.190751	0.439306	0.693642	1	0.549133	0.618497	0.855491	0.930636	0.988439	0.046243	0.184971	0.352601	0.49711	0.815029	0.537572	0.465116	0.023121	0.283237	0.485549	0.745665	0.988439	0.300578
0.348028	0.322506	0.329466	0.213953	0.227907	0.209302	0.011601	0.227378	0.417633	0.672854	0.983759	0.00464	0.197216	0.568445	0.835267	0.990719	0.00232	0.296984	0.535963	0.726218	1	0.568445	0.006961	0.424594	0.004651	0.07907	0	0.00232	0.141531	0.299304	0.62413	1	0.972158	0.972158	0.972158	0.974478	0.976798	0.187935	0.50348	0.647332	0.800464	0.953596	0.436195	0.306977	0.064965	0.491879	0.638051	0.791183	0.99536	0.329466
0.12	0.448889	0.431111	0.095768	0.104677	0.394209	0.015556	0.2	0.517778	0.651111	0.997778	0.004444	0.242222	0.475556	0.764444	0.982222	0.002222	0.255556	0.515556	0.748889	1	0.177778	0.037778	0.784444	0.008909	0.084633	0.008909	0.002222	0.3	0.513333	0.771111	1	0.277778	0.284444	0.782222	0.811111	0.864444	0.006667	0.226667	0.466667	0.72	0.993333	0.837778	0.155902	0.006667	0.251111	0.488889	0.766667	0.993333	0.426667
0.366412	0.279898	0.35369	0.206633	0.267857	0.221939	0.007634	0.239186	0.430025	0.737913	0.989822	0.012723	0.249364	0.496183	0.699746	0.992366	0.002545	0.244275	0.564885	0.765903	1	0.236641	0.040712	0.722646	0.015306	0.086735	0	0.002545	0.292621	0.521628	0.776081	1	0.78117	0.860051	0.870229	0.888041	0.898219	0.015267	0.21374	0.458015	0.707379	0.984733	0.513995	0.428571	0.005089	0.251908	0.496183	0.720102	0.994911	0.315522
0.367935	0.3391	0.292964	0.210162	0.224018	0.193995	0.00346	0.264129	0.486736	0.701269	0.998847	0.002307	0.265283	0.573241	0.866205	0.997693	0.001153	0.200692	0.463668	0.678201	1	0.434833	0.114187	0.45098	0.048499	0.060046	0	0.001153	0.239908	0.615917	0.885813	1	0.038062	0.155709	0.599769	0.651672	0.981546	0.004614	0.305652	0.454441	0.707036	0.8812	0.468281	0.394919	0.005767	0.215686	0.452134	0.677047	0.983852	0.369089
0.280992	0.366942	0.352066	0.168874	0.231788	0.31457	0.006612	0.282645	0.528926	0.752066	0.990083	0.003306	0.198347	0.471074	0.757025	0.998347	0.001653	0.266116	0.490909	0.72562	1	0.816529	0.150413	0.033058	0.102649	0.019868	0	0.001653	0.244628	0.490909	0.722314	1	0.028099	0.25124	0.502479	0.765289	0.985124	0.05124	0.117355	0.829752	0.932231	0.973554	0.52562	0.639073	0.004959	0.249587	0.489256	0.730579	0.995041	0.38843
0.372141	0.357588	0.27027	0.233333	0.1875	0.20625	0.006237	0.280665	0.50104	0.773389	0.997921	0.014553	0.239085	0.480249	0.702703	1	0.002079	0.214137	0.52183	0.725572	0.983368	0.534304	0.297297	0.168399	0.110417	0.04375	0.00625	0.002079	0.274428	0.469854	0.70894	1	0.116424	0.264033	0.509356	0.719335	0.985447	0.004158	0.060291	0.571726	0.821206	0.889813	0.511435	0.354167	0.008316	0.218295	0.507277	0.690229	0.993763	0.37422
0.454412	0.286765	0.258824	0.251841	0.260677	0.14433	0.002941	0.282353	0.525	0.742647	0.998529	0.007353	0.163235	0.485294	0.766176	1	0.001471	0.241176	0.464706	0.719118	0.994118	0.177941	0.045588	0.776471	0.019146	0.007364	0.001473	0.001471	0.063235	0.129412	0.954412	1	0.016176	0.032353	0.072059	0.083824	0.144118	0.048529	0.354412	0.548529	0.742647	0.942647	0.301471	0.483063	0.014706	0.255882	0.547059	0.805882	0.994118	0.326471
[truncated: 437 more rows]
[truncated: 83 more columns]
