# Supplementary material for: Prediction of RNA‐Binding Proteins by Voting Systems
Source: Hindawi journal article supplement (doi:10.1155/2011/506205), 2011-01-01
Supplement: f1 [file 506205.f1.zip › testSet4.csv]

v1	v2	v3	v4	v5	v6	v7	v8	v9	v10	v11	v12	v13	v14	v15	v16	v17	v18	v19	v20	v21	v22	v23	v24	v25	v26	v27	v28	v29	v30	v31	v32	v33	v34	v35	v36	v37	v38	v39	v40	v41	v42	v43	v44	v45	v46	v47	v48	v49	v50
0.336735	0.362245	0.30102	0.235294	0.209719	0.191816	0.007653	0.257653	0.512755	0.793367	0.994898	0.005102	0.209184	0.52551	0.795918	1	0.002551	0.237245	0.443878	0.658163	0.905612	0.357143	0.058673	0.584184	0.033248	0.099744	0.012788	0.002551	0.247449	0.558673	0.875	1	0.040816	0.076531	0.091837	0.420918	0.818878	0.010204	0.306122	0.497449	0.670918	0.954082	0.533163	0.409207	0.010204	0.288265	0.520408	0.704082	0.959184	0.418367
0.359223	0.349515	0.291262	0.303922	0.137255	0.205882	0.048544	0.174757	0.466019	0.728155	1	0.019417	0.300971	0.485437	0.708738	0.980583	0.009709	0.223301	0.514563	0.757282	0.961165	0.601942	0.106796	0.291262	0.078431	0.078431	0	0.009709	0.165049	0.368932	0.640777	1	0.126214	0.291262	0.320388	0.427184	0.61165	0.038835	0.533981	0.757282	0.825243	0.951456	0.378641	0.372549	0.038835	0.320388	0.553398	0.805825	0.961165	0.330097
0.375	0.306818	0.318182	0.252874	0.229885	0.16092	0.034091	0.238636	0.477273	0.647727	0.988636	0.022727	0.193182	0.534091	0.727273	0.965909	0.011364	0.284091	0.465909	0.761364	1	0.454545	0.511364	0.034091	0.114943	0.022989	0.022989	0.011364	0.215909	0.556818	0.670455	1	0.102273	0.284091	0.477273	0.738636	0.988636	0.045455	0.045455	0.045455	0.943182	0.954545	0.363636	0.45977	0.125	0.272727	0.465909	0.761364	0.965909	0.284091
0.289931	0.465278	0.244792	0.21913	0.154783	0.24	0.005208	0.239583	0.522569	0.690972	1	0.003472	0.237847	0.475694	0.776042	0.996528	0.001736	0.286458	0.503472	0.722222	0.994792	0.642361	0.090278	0.267361	0.046957	0.085217	0.001739	0.001736	0.220486	0.510417	0.805556	1	0.128472	0.407986	0.479167	0.654514	0.723958	0.026042	0.256944	0.505208	0.670139	0.96875	0.449653	0.389565	0.017361	0.256944	0.529514	0.774306	0.994792	0.472222
0.359375	0.317708	0.322917	0.230366	0.209424	0.26178	0.020833	0.244792	0.46875	0.755208	0.963542	0.010417	0.229167	0.489583	0.703125	0.989583	0.005208	0.25	0.510417	0.75	1	0.46875	0.208333	0.322917	0.109948	0.057592	0.005236	0.005208	0.317708	0.567708	0.713542	1	0.161458	0.338542	0.463542	0.755208	0.994792	0.015625	0.109375	0.307292	0.822917	0.96875	0.484375	0.460733	0.026042	0.270833	0.505208	0.734375	0.994792	0.307292
0.305195	0.467532	0.227273	0.286645	0.143322	0.205212	0.012987	0.211039	0.415584	0.701299	0.987013	0.006494	0.318182	0.61039	0.827922	1	0.003247	0.214286	0.376623	0.623377	0.957792	0.62013	0.090909	0.288961	0.035831	0.055375	0.009772	0.003247	0.285714	0.652597	0.844156	1	0.233766	0.253247	0.363636	0.477273	0.801948	0.029221	0.12013	0.415584	0.558442	0.75974	0.503247	0.345277	0.035714	0.301948	0.548701	0.821429	0.993506	0.477273
0.404138	0.256552	0.33931	0.205801	0.270718	0.191989	0.002759	0.246897	0.506207	0.773793	1	0.015172	0.268966	0.503448	0.73931	0.997241	0.001379	0.238621	0.475862	0.725517	0.994483	0.445517	0.238621	0.315862	0.087017	0.053867	0.004144	0.001379	0.244138	0.445517	0.743448	1	0.064828	0.188966	0.412414	0.851034	0.950345	0.002759	0.317241	0.590345	0.711724	0.84	0.522759	0.361878	0.006897	0.275862	0.488276	0.728276	0.950345	0.268966
0.338235	0.448529	0.213235	0.237037	0.17037	0.118519	0.036765	0.25	0.470588	0.676471	1	0.044118	0.323529	0.654412	0.875	0.992647	0.007353	0.095588	0.294118	0.514706	0.691176	0.323529	0.161765	0.514706	0.059259	0.088889	0	0.007353	0.25	0.330882	0.463235	1	0.014706	0.205882	0.411765	0.477941	0.522059	0.051471	0.544118	0.676471	0.852941	0.992647	0.316176	0.281481	0.022059	0.176471	0.411765	0.588235	0.963235	0.477941
0.329208	0.361386	0.309406	0.2134	0.188586	0.26799	0.00495	0.264851	0.490099	0.777228	0.997525	0.007426	0.215347	0.509901	0.727723	0.987624	0.002475	0.25	0.487624	0.720297	1	0.371287	0.084158	0.544554	0.034739	0.114144	0.004963	0.002475	0.222772	0.425743	0.735149	1	0.05198	0.108911	0.195545	0.287129	0.35396	0.014851	0.393564	0.574257	0.772277	0.985149	0.534653	0.436725	0.009901	0.247525	0.435644	0.685644	0.980198	0.376238
0.368421	0.359649	0.27193	0.20354	0.230088	0.20354	0.026316	0.254386	0.491228	0.807018	1	0.017544	0.219298	0.429825	0.622807	0.95614	0.008772	0.166667	0.587719	0.798246	0.964912	0.359649	0.27193	0.368421	0.106195	0.070796	0.017699	0.008772	0.175439	0.464912	0.763158	1	0.04386	0.105263	0.394737	0.578947	0.850877	0.184211	0.263158	0.666667	0.780702	0.95614	0.429825	0.389381	0.052632	0.236842	0.473684	0.666667	0.938596	0.315789
0.354535	0.285041	0.360424	0.193396	0.246462	0.205189	0.004711	0.268551	0.514723	0.791519	1	0.003534	0.281508	0.507656	0.727915	0.998822	0.001178	0.203769	0.468787	0.722026	0.992933	0.3298	0.189635	0.480565	0.069575	0.083726	0.003538	0.001178	0.314488	0.539458	0.762073	1	0.146054	0.308598	0.546525	0.829211	0.995289	0.011779	0.166078	0.436985	0.689046	0.96702	0.542992	0.382075	0.010601	0.274441	0.475854	0.705536	0.992933	0.286219
0.347692	0.384615	0.267692	0.228395	0.182099	0.209877	0.015385	0.166154	0.486154	0.729231	1	0.006154	0.301538	0.523077	0.775385	0.990769	0.003077	0.227692	0.443077	0.698462	0.993846	0.510769	0.156923	0.332308	0.070988	0.070988	0.009259	0.003077	0.267692	0.513846	0.793846	1	0.009231	0.156923	0.224615	0.44	0.972308	0.092308	0.323077	0.646154	0.747692	0.966154	0.486154	0.345679	0.009231	0.236923	0.458462	0.673846	0.981538	0.378462
0.316113	0.364084	0.319803	0.237685	0.23399	0.225369	0.00246	0.259533	0.531365	0.773678	1	0.00492	0.238622	0.463715	0.712177	0.99754	0.00123	0.255843	0.512915	0.769988	0.99877	0.464945	0.239852	0.295203	0.096059	0.059113	0.002463	0.00123	0.230012	0.478475	0.738007	1	0.04182	0.198032	0.415744	0.801968	0.99877	0.00615	0.319803	0.570726	0.706027	0.99262	0.564576	0.399015	0.00369	0.258303	0.468635	0.742927	0.99877	0.383764
0.411765	0.285714	0.302521	0.271186	0.245763	0.169492	0.042017	0.252101	0.546218	0.697479	1	0.02521	0.243697	0.521008	0.789916	0.941176	0.008403	0.210084	0.420168	0.722689	0.983193	0.428571	0.243697	0.327731	0.084746	0.067797	0	0.008403	0.184874	0.462185	0.647059	1	0.243697	0.294118	0.394958	0.470588	0.554622	0.067227	0.134454	0.747899	0.865546	0.983193	0.411765	0.474576	0.05042	0.268908	0.478992	0.739496	0.97479	0.327731
0.369309	0.323777	0.306914	0.214527	0.222973	0.190878	0.003373	0.165261	0.514334	0.777403	1	0.016863	0.252951	0.448567	0.733558	0.998314	0.001686	0.29511	0.49747	0.708263	0.989882	0.522766	0.150084	0.32715	0.052365	0.072635	0.005068	0.001686	0.129848	0.403035	0.76054	1	0.163575	0.413153	0.598651	0.718381	0.848229	0.145025	0.340641	0.509275	0.743676	0.920742	0.480607	0.320946	0.015177	0.303541	0.485666	0.706577	0.919056	0.367622
0.310606	0.431818	0.257576	0.274809	0.183206	0.19084	0.037879	0.257576	0.568182	0.727273	0.984848	0.015152	0.280303	0.522727	0.772727	1	0.007576	0.189394	0.340909	0.583333	0.962121	0.507576	0.492424	0	0.152672	0	0	0.007576	0.363636	0.636364	0.856061	1	0.037879	0.189394	0.356061	0.598485	0.969697	0	0	0	0	0	0.340909	0.381679	0.045455	0.204545	0.416667	0.606061	0.962121	0.431818
0.214575	0.578947	0.206478	0.176471	0.097363	0.237323	0.022267	0.244939	0.38664	0.744939	1	0.004049	0.259109	0.552632	0.751012	0.995951	0.002024	0.226721	0.47166	0.734818	0.993927	0.789474	0.032389	0.178138	0.016227	0.060852	0	0.002024	0.222672	0.47166	0.710526	1	0.008097	0.01417	0.433198	0.98583	0.993927	0.022267	0.396761	0.672065	0.765182	0.809717	0.451417	0.332657	0.010121	0.200405	0.508097	0.704453	0.993927	0.595142
0.296296	0.416667	0.287037	0.232198	0.176471	0.28483	0.07716	0.299383	0.515432	0.740741	0.978395	0.006173	0.197531	0.503086	0.759259	1	0.003086	0.209877	0.462963	0.703704	0.993827	0.481481	0.262346	0.256173	0.105263	0.06192	0	0.003086	0.212963	0.54321	0.780864	1	0.015432	0.277778	0.450617	0.753086	0.950617	0.101852	0.246914	0.524691	0.716049	0.984568	0.438272	0.297214	0.009259	0.200617	0.453704	0.731481	0.993827	0.432099
0.250755	0.425982	0.323263	0.187879	0.178788	0.272727	0.006042	0.259819	0.528701	0.776435	1	0.012085	0.205438	0.471299	0.703927	0.996979	0.003021	0.265861	0.486405	0.746224	0.978852	0.601208	0.256798	0.141994	0.075758	0.039394	0.00303	0.003021	0.175227	0.519637	0.773414	1	0.012085	0.274924	0.410876	0.628399	0.930514	0.033233	0.335347	0.483384	0.734139	0.978852	0.577039	0.345455	0.012085	0.232628	0.438066	0.673716	0.978852	0.444109
0.328502	0.400966	0.270531	0.256659	0.159806	0.232446	0.007246	0.2343	0.449275	0.673913	0.985507	0.004831	0.277778	0.628019	0.823671	0.997585	0.002415	0.231884	0.422705	0.615942	1	0.669082	0.171498	0.15942	0.067797	0.038741	0	0.002415	0.270531	0.657005	0.823671	1	0.009662	0.176329	0.359903	0.536232	0.927536	0.111111	0.198068	0.381643	0.512077	0.652174	0.574879	0.2954	0.009662	0.316425	0.666667	0.809179	0.995169	0.437198
0.394089	0.37931	0.226601	0.331683	0.158416	0.153465	0.009852	0.325123	0.605911	0.788177	1	0.029557	0.251232	0.487685	0.724138	0.970443	0.004926	0.142857	0.344828	0.546798	0.995074	0.334975	0.251232	0.413793	0.039604	0.059406	0.019802	0.004926	0.231527	0.748768	0.842365	1	0.044335	0.37931	0.44335	0.517241	0.975369	0.098522	0.216749	0.600985	0.704433	0.985222	0.344828	0.376238	0.044335	0.192118	0.369458	0.527094	0.965517	0.37931
0.333797	0.358832	0.307371	0.236769	0.192201	0.218663	0.004172	0.194715	0.458971	0.732962	0.997218	0.006954	0.260083	0.521558	0.755216	1	0.001391	0.2879	0.50904	0.752434	0.993046	0.381085	0.155772	0.463143	0.054318	0.090529	0.001393	0.001391	0.235049	0.499305	0.713491	1	0.004172	0.299026	0.478442	0.564673	0.958275	0.022253	0.21975	0.495132	0.781641	0.993046	0.561892	0.342618	0.005563	0.301808	0.522949	0.751043	0.993046	0.371349
0.35274	0.344178	0.303082	0.272727	0.221269	0.185249	0.003425	0.217466	0.479452	0.743151	0.993151	0.005137	0.191781	0.453767	0.707192	1	0.001712	0.325342	0.535959	0.773973	0.998288	0.530822	0.150685	0.318493	0.060034	0.073756	0.005146	0.001712	0.133562	0.318493	0.667808	1	0.008562	0.481164	0.631849	0.828767	0.962329	0.212329	0.412671	0.571918	0.77911	0.989726	0.496575	0.367067	0.005137	0.32363	0.501712	0.743151	0.994863	0.34589
0.377358	0.330189	0.292453	0.266667	0.228571	0.2	0.018868	0.188679	0.40566	0.754717	0.981132	0.066038	0.301887	0.528302	0.745283	1	0.009434	0.226415	0.471698	0.679245	0.990566	0.443396	0.556604	0	0.190476	0	0	0.009434	0.188679	0.481132	0.726415	1	0.037736	0.235849	0.537736	0.773585	0.981132	0	0	0	0	0	0.45283	0.32381	0.037736	0.254717	0.537736	0.669811	0.971698	0.358491
0.425197	0.326772	0.248031	0.252964	0.209486	0.150198	0.007874	0.26378	0.507874	0.818898	1	0.023622	0.299213	0.551181	0.755906	0.996063	0.003937	0.177165	0.401575	0.574803	0.968504	0.472441	0.122047	0.405512	0.047431	0.079051	0.007905	0.003937	0.358268	0.673228	0.838583	1	0.047244	0.070866	0.42126	0.543307	0.582677	0.011811	0.204724	0.397638	0.649606	0.933071	0.385827	0.332016	0.035433	0.153543	0.34252	0.547244	0.968504	0.346457
0.33	0.4	0.27	0.242424	0.141414	0.212121	0.06	0.27	0.48	0.67	0.94	0.02	0.22	0.59	0.82	1	0.01	0.15	0.33	0.54	0.96	0.47	0.26	0.27	0.10101	0.080808	0	0.01	0.16	0.63	0.79	1	0.28	0.33	0.59	0.72	0.86	0.07	0.18	0.25	0.45	0.95	0.37	0.40404	0.07	0.17	0.45	0.6	0.96	0.43
0.408805	0.27044	0.320755	0.227848	0.227848	0.189873	0.018868	0.201258	0.427673	0.72327	0.987421	0.012579	0.339623	0.534591	0.773585	0.981132	0.006289	0.194969	0.45283	0.660377	1	0.339623	0.08805	0.572327	0.037975	0.088608	0	0.006289	0.081761	0.427673	0.710692	1	0.45283	0.465409	0.490566	0.528302	0.566038	0.132075	0.283019	0.603774	0.792453	0.981132	0.459119	0.443038	0.044025	0.264151	0.534591	0.742138	0.981132	0.264151
0.370466	0.365285	0.264249	0.246433	0.190661	0.18677	0.003886	0.198187	0.505181	0.759067	1	0.002591	0.25	0.477979	0.748705	0.998705	0.001295	0.304404	0.51943	0.720207	0.996114	0.512953	0.120466	0.36658	0.051881	0.077821	0.002594	0.001295	0.158031	0.387306	0.725389	1	0.091969	0.380829	0.550518	0.664508	0.954663	0.005181	0.340674	0.568653	0.80829	0.994819	0.42487	0.33463	0.005181	0.304404	0.496114	0.704663	0.996114	0.411917
0.328294	0.315335	0.356371	0.19697	0.225108	0.244589	0.008639	0.25486	0.511879	0.764579	1	0.00432	0.235421	0.526998	0.766739	0.99568	0.00216	0.237581	0.483801	0.693305	0.99784	0.401728	0.146868	0.451404	0.051948	0.090909	0.004329	0.00216	0.263499	0.526998	0.775378	1	0.095032	0.269978	0.444924	0.62851	0.734341	0.012959	0.209503	0.531317	0.790497	0.993521	0.552916	0.363636	0.012959	0.226782	0.447084	0.684665	0.974082	0.343413
0.325109	0.362845	0.312046	0.231105	0.229651	0.204942	0.002903	0.267054	0.489115	0.751814	1	0.005806	0.223512	0.49492	0.748911	0.998549	0.001451	0.236575	0.503628	0.740203	0.991292	0.442671	0.149492	0.407837	0.050872	0.088663	0.001453	0.001451	0.245283	0.552975	0.764877	1	0.044993	0.153846	0.413643	0.773585	0.994194	0.013062	0.313498	0.49492	0.711176	0.984035	0.496372	0.360465	0.01016	0.236575	0.526851	0.734398	0.995646	0.384615
0.35545	0.383886	0.260664	0.3	0.180952	0.17619	0.009479	0.241706	0.549763	0.767773	1	0.014218	0.232227	0.398104	0.616114	0.990521	0.004739	0.260664	0.592417	0.796209	0.971564	0.535545	0.14218	0.322275	0.07619	0.066667	0	0.004739	0.265403	0.398104	0.691943	1	0.009479	0.056872	0.587678	0.739336	0.924171	0.094787	0.199052	0.554502	0.791469	0.981043	0.521327	0.342857	0.014218	0.331754	0.521327	0.748815	0.981043	0.36019
0.243647	0.603886	0.152466	0.293413	0.086826	0.164671	0.00299	0.198804	0.412556	0.811659	0.998505	0.008969	0.349776	0.553064	0.747384	0.994021	0.001495	0.104634	0.237668	0.587444	1	0.68012	0.09417	0.22571	0.041916	0.062874	0.002994	0.001495	0.307922	0.512706	0.753363	1	0.00299	0.058296	0.158445	0.212257	0.967115	0.022422	0.189836	0.626308	0.886398	0.989537	0.608371	0.335329	0.004484	0.328849	0.526158	0.733931	0.994021	0.556054
0.357143	0.326531	0.316327	0.309278	0.226804	0.216495	0.05102	0.244898	0.489796	0.714286	0.979592	0.030612	0.326531	0.561224	0.806122	1	0.010204	0.112245	0.316327	0.693878	0.989796	0.530612	0.469388	0	0.123711	0	0	0.010204	0.142857	0.367347	0.714286	1	0.102041	0.387755	0.571429	0.795918	0.989796	0	0	0	0	0	0.428571	0.43299	0.040816	0.132653	0.397959	0.653061	0.959184	0.27551
0.359801	0.26799	0.372208	0.190062	0.277019	0.224845	0.006203	0.248139	0.522333	0.751861	0.998759	0.004963	0.258065	0.486352	0.734491	0.980149	0.001241	0.241935	0.495037	0.754342	1	0.48139	0.222084	0.296526	0.095652	0.055901	0.003727	0.001241	0.210918	0.451613	0.736973	1	0.040943	0.183623	0.426799	0.800248	0.997519	0.006203	0.332506	0.554591	0.7134	0.991315	0.57072	0.404969	0.003722	0.244417	0.478908	0.743176	0.997519	0.290323
0.407767	0.237864	0.354369	0.136585	0.35122	0.165854	0.014563	0.237864	0.466019	0.752427	0.995146	0.019417	0.218447	0.485437	0.631068	0.985437	0.004854	0.291262	0.524272	0.76699	1	0.461165	0.169903	0.368932	0.068293	0.087805	0.019512	0.004854	0.145631	0.504854	0.699029	1	0.218447	0.291262	0.616505	0.936893	0.980583	0.038835	0.330097	0.436893	0.73301	0.912621	0.475728	0.419512	0.019417	0.354369	0.514563	0.752427	0.980583	0.208738
0.406452	0.258065	0.335484	0.181818	0.279221	0.181818	0.019355	0.245161	0.483871	0.741935	1	0.012903	0.264516	0.470968	0.677419	0.993548	0.006452	0.225806	0.496774	0.787097	0.974194	0.335484	0.270968	0.393548	0.097403	0.071429	0.019481	0.006452	0.187097	0.587097	0.767742	1	0.058065	0.277419	0.632258	0.890323	0.980645	0.019355	0.212903	0.387097	0.483871	0.825806	0.380645	0.467532	0.03871	0.219355	0.535484	0.748387	0.967742	0.264516
0.4	0.248276	0.351724	0.180556	0.215278	0.208333	0.013793	0.234483	0.475862	0.682759	1	0.068966	0.262069	0.572414	0.806897	0.986207	0.006897	0.206897	0.496552	0.772414	0.97931	0.337931	0.337931	0.324138	0.131944	0.034722	0.006944	0.006897	0.117241	0.510345	0.737931	1	0.013793	0.255172	0.627586	0.875862	0.986207	0.172414	0.324138	0.406897	0.489655	0.710345	0.4	0.486111	0.02069	0.206897	0.544828	0.744828	0.97931	0.255172
0.359756	0.420732	0.219512	0.276074	0.202454	0.153374	0.02439	0.280488	0.52439	0.72561	0.97561	0.012195	0.176829	0.365854	0.670732	0.987805	0.006098	0.439024	0.634146	0.804878	1	0.45122	0.195122	0.353659	0.06135	0.07362	0	0.006098	0.317073	0.432927	0.682927	1	0.268293	0.518293	0.652439	0.823171	0.902439	0.018293	0.146341	0.5	0.707317	0.969512	0.292683	0.404908	0.030488	0.481707	0.621951	0.786585	0.981707	0.414634
0.44898	0.352041	0.19898	0.333333	0.164103	0.138462	0.015306	0.234694	0.479592	0.734694	1	0.010204	0.265306	0.520408	0.80102	0.994898	0.005102	0.209184	0.515306	0.688776	0.959184	0.52551	0.158163	0.316327	0.041026	0.092308	0	0.005102	0.295918	0.489796	0.836735	1	0.193878	0.326531	0.591837	0.647959	0.688776	0.030612	0.122449	0.428571	0.760204	0.872449	0.428571	0.358974	0.02551	0.239796	0.520408	0.683673	0.954082	0.382653
0.343186	0.35468	0.302135	0.228618	0.182566	0.213816	0.003284	0.293924	0.505747	0.758621	0.998358	0.006568	0.211823	0.490969	0.766831	1	0.001642	0.256158	0.495895	0.727422	0.981938	0.446634	0.134647	0.418719	0.049342	0.085526	0.006579	0.001642	0.238095	0.472906	0.719212	1	0.027915	0.229885	0.422003	0.661741	0.954023	0.050903	0.249589	0.536946	0.809524	0.986864	0.500821	0.345395	0.013136	0.226601	0.464696	0.701149	0.934319	0.357964
0.328571	0.332143	0.339286	0.207885	0.229391	0.240143	0.007143	0.3	0.571429	0.803571	0.989286	0.046429	0.235714	0.439286	0.642857	1	0.003571	0.189286	0.482143	0.760714	0.992857	0.392857	0.217857	0.389286	0.064516	0.078853	0.014337	0.003571	0.307143	0.564286	0.832143	1	0.010714	0.078571	0.246429	0.585714	0.896429	0.110714	0.296429	0.475	0.75	0.985714	0.492857	0.444444	0.010714	0.242857	0.467857	0.721429	0.992857	0.375
0.475129	0.307033	0.217839	0.248927	0.183691	0.142489	0.001715	0.144082	0.324185	0.642367	0.996569	0.005146	0.370497	0.614923	0.846484	0.998285	0.000858	0.435678	0.593482	0.754717	1	0.505146	0.107204	0.38765	0.046352	0.077253	0.00515	0.000858	0.20669	0.392796	0.686106	1	0.002573	0.543739	0.64494	0.750429	0.999142	0.012864	0.251286	0.556604	0.805317	0.988851	0.349914	0.291845	0.006861	0.483705	0.61235	0.755575	0.997427	0.367067
0.516854	0.235955	0.247191	0.220339	0.231638	0.135593	0.022472	0.303371	0.550562	0.808989	0.988764	0.011236	0.191011	0.432584	0.719101	1	0.005618	0.174157	0.410112	0.657303	0.994382	0.353933	0.095506	0.550562	0.045198	0.101695	0	0.005618	0.08427	0.460674	0.769663	1	0.404494	0.421348	0.44382	0.483146	0.870787	0.117978	0.264045	0.567416	0.758427	0.977528	0.410112	0.440678	0.039326	0.224719	0.432584	0.606742	0.960674	0.230337
0.31441	0.366812	0.318777	0.236842	0.22807	0.232456	0.0131	0.257642	0.49345	0.733624	0.995633	0.004367	0.209607	0.406114	0.71179	0.982533	0.034934	0.28821	0.576419	0.772926	1	0.349345	0.017467	0.633188	0.008772	0.078947	0	0.004367	0.087336	0.454148	0.855895	1	0.41048	0.41048	0.414847	0.419214	0.423581	0.091703	0.28821	0.532751	0.703057	0.991266	0.49345	0.473684	0.017467	0.222707	0.471616	0.694323	0.9869	0.406114
0.410959	0.214612	0.374429	0.178899	0.348624	0.169725	0.013699	0.255708	0.484018	0.707763	1	0.009132	0.136986	0.60274	0.849315	0.968037	0.004566	0.246575	0.488584	0.69863	0.990868	0.365297	0.228311	0.406393	0.073394	0.055046	0	0.004566	0.228311	0.392694	0.844749	1	0.045662	0.260274	0.515982	0.757991	0.995434	0.127854	0.223744	0.575342	0.680365	0.885845	0.557078	0.449541	0.022831	0.242009	0.534247	0.767123	0.990868	0.210046
0.406545	0.306156	0.287299	0.241398	0.241398	0.169811	0.003328	0.239046	0.507488	0.731559	0.999445	0.001109	0.289517	0.50416	0.745979	1	0.000555	0.207432	0.473655	0.770383	0.997227	0.569606	0.160843	0.269551	0.064373	0.056604	0.00444	0.000555	0.287854	0.523572	0.678314	1	0.010538	0.260677	0.445369	0.77482	0.995563	0.006656	0.143649	0.418747	0.833611	0.991681	0.468109	0.358491	0.002773	0.281198	0.494176	0.806988	0.996672	0.324459
0.387665	0.299559	0.312775	0.212389	0.269912	0.19469	0.013216	0.22467	0.46696	0.726872	1	0.008811	0.290749	0.585903	0.770925	0.982379	0.004405	0.229075	0.462555	0.722467	0.973568	0.400881	0.22467	0.374449	0.070796	0.061947	0	0.004405	0.23348	0.502203	0.828194	1	0.044053	0.251101	0.343612	0.682819	0.911894	0.118943	0.207048	0.54185	0.634361	0.960352	0.515419	0.469027	0.022026	0.23348	0.497797	0.718062	0.933921	0.299559
0.36014	0.265734	0.374126	0.196491	0.259649	0.192982	0.006993	0.251748	0.48951	0.77972	0.993007	0.041958	0.248252	0.51049	0.716783	1	0.003497	0.237762	0.486014	0.751748	0.996503	0.405594	0.171329	0.423077	0.049123	0.077193	0	0.003497	0.178322	0.440559	0.695804	1	0.185315	0.34965	0.43007	0.632867	0.723776	0.034965	0.244755	0.527972	0.828671	0.986014	0.555944	0.414035	0.024476	0.244755	0.468531	0.674825	0.982517	0.265734
0.382022	0.393258	0.224719	0.295455	0.181818	0.181818	0.033708	0.146067	0.359551	0.640449	0.966292	0.022472	0.280899	0.483146	0.685393	0.988764	0.011236	0.404494	0.696629	0.797753	1	0.348315	0.033708	0.617978	0.022727	0.090909	0	0.011236	0.483146	0.606742	0.876404	1	0.94382	0.94382	0.94382	0.955056	0.966292	0.033708	0.168539	0.325843	0.674157	0.865169	0.348315	0.409091	0.146067	0.303371	0.651685	0.786517	0.94382	0.359551
0.299465	0.358289	0.342246	0.22043	0.204301	0.241935	0.037433	0.294118	0.44385	0.721925	1	0.016043	0.176471	0.582888	0.780749	0.994652	0.005348	0.278075	0.486631	0.73262	0.946524	0.44385	0.427807	0.128342	0.155914	0.037634	0.005376	0.005348	0.299465	0.604278	0.84492	1	0.02139	0.315508	0.481283	0.663102	0.935829	0.085561	0.112299	0.256684	0.28877	0.823529	0.449198	0.473118	0.02139	0.278075	0.481283	0.716578	0.941176	0.379679
0.374172	0.304636	0.321192	0.232558	0.259136	0.192691	0.009934	0.304636	0.516556	0.764901	0.996689	0.006623	0.178808	0.506623	0.778146	0.990066	0.003311	0.228477	0.453642	0.695364	1	0.5	0.195364	0.304636	0.07309	0.046512	0.019934	0.003311	0.304636	0.582781	0.824503	1	0.072848	0.142384	0.569536	0.695364	0.887417	0.029801	0.245033	0.377483	0.559603	0.870861	0.427152	0.358804	0.023179	0.235099	0.496689	0.675497	0.950331	0.360927
0.415842	0.29703	0.287129	0.23	0.27	0.17	0.029703	0.227723	0.485149	0.653465	0.970297	0.019802	0.346535	0.574257	0.772277	0.990099	0.009901	0.19802	0.415842	0.732673	1	0.366337	0.029703	0.60396	0.02	0.1	0	0.009901	0.514851	0.623762	0.772277	1	0.950495	0.950495	0.950495	0.960396	0.970297	0.029703	0.168317	0.316832	0.594059	0.881188	0.386139	0.46	0.049505	0.29703	0.623762	0.792079	0.950495	0.29703
0.345638	0.295302	0.35906	0.198653	0.259259	0.239057	0.013423	0.234899	0.432886	0.758389	0.989933	0.026846	0.244966	0.567114	0.738255	0.996644	0.003356	0.241611	0.483221	0.721477	1	0.392617	0.157718	0.449664	0.057239	0.117845	0.003367	0.003356	0.174497	0.419463	0.684564	1	0.010067	0.268456	0.442953	0.637584	0.721477	0.026846	0.298658	0.536913	0.828859	0.989933	0.54698	0.397306	0.006711	0.244966	0.473154	0.671141	0.983221	0.332215
0.398058	0.281553	0.320388	0.254902	0.196078	0.186275	0.029126	0.165049	0.436893	0.650485	0.990291	0.019417	0.291262	0.495146	0.757282	1	0.009709	0.262136	0.466019	0.737864	0.951456	0.524272	0.359223	0.116505	0.127451	0.029412	0.009804	0.009709	0.203883	0.572816	0.854369	1	0.223301	0.339806	0.524272	0.718447	0.961165	0.116505	0.135922	0.165049	0.407767	0.436893	0.456311	0.333333	0.116505	0.320388	0.466019	0.737864	0.951456	0.378641
0.392157	0.411765	0.196078	0.336634	0.148515	0.158416	0.019608	0.27451	0.539216	0.833333	1	0.029412	0.205882	0.568627	0.735294	0.980392	0.009804	0.215686	0.333333	0.421569	0.990196	0.745098	0.137255	0.117647	0.059406	0.059406	0	0.009804	0.186275	0.558824	0.745098	1	0.254902	0.27451	0.323529	0.352941	0.441176	0.490196	0.509804	0.833333	0.872549	0.901961	0.22549	0.158416	0.078431	0.254902	0.333333	0.431373	0.892157	0.45098
0.376068	0.299145	0.324786	0.258621	0.25	0.189655	0.034188	0.230769	0.512821	0.777778	1	0.017094	0.222222	0.487179	0.65812	0.982906	0.008547	0.239316	0.461538	0.760684	0.965812	0.478632	0.435897	0.08547	0.094828	0.025862	0.008621	0.008547	0.162393	0.512821	0.717949	1	0.034188	0.299145	0.452991	0.606838	0.897436	0.119658	0.128205	0.91453	0.931624	0.957265	0.401709	0.586207	0.025641	0.25641	0.42735	0.726496	0.940171	0.316239
0.336	0.4192	0.2448	0.258013	0.152244	0.189103	0.0144	0.2976	0.5424	0.7664	0.9984	0.0032	0.2576	0.592	0.8224	1	0.0016	0.2096	0.3584	0.5344	0.9408	0.5872	0.1152	0.2976	0.041667	0.076923	0.003205	0.0016	0.2896	0.6848	0.8432	1	0.1216	0.2576	0.4016	0.5264	0.6048	0.016	0.1872	0.3648	0.536	0.9952	0.4032	0.307692	0.0192	0.2176	0.3776	0.5568	0.976	0.4192
0.401544	0.216216	0.382239	0.162791	0.302326	0.170543	0.007722	0.23166	0.46332	0.752896	0.992278	0.015444	0.339768	0.552124	0.683398	0.980695	0.003861	0.250965	0.486486	0.764479	1	0.389961	0.185328	0.42471	0.054264	0.093023	0	0.003861	0.158301	0.409266	0.675676	1	0.135135	0.305019	0.3861	0.610039	0.706564	0.030888	0.262548	0.517375	0.830116	0.988417	0.548263	0.44186	0.015444	0.23166	0.474903	0.675676	0.980695	0.235521
0.39599	0.397243	0.206767	0.331242	0.159348	0.16813	0.005013	0.256892	0.52381	0.799499	1	0.002506	0.276942	0.467419	0.734336	0.996241	0.001253	0.179198	0.484962	0.685464	0.997494	0.714286	0.070175	0.215539	0.035132	0.067754	0	0.001253	0.239348	0.457393	0.695489	1	0.070175	0.358396	0.754386	0.883459	0.938596	0.005013	0.186717	0.552632	0.834586	0.997494	0.327068	0.351317	0.003759	0.229323	0.541353	0.775689	0.997494	0.442356
0.304167	0.358333	0.3375	0.179916	0.225941	0.263598	0.0375	0.341667	0.575	0.820833	1	0.008333	0.1875	0.3875	0.604167	0.983333	0.004167	0.295833	0.541667	0.741667	0.9875	0.479167	0.358333	0.1625	0.133891	0.025105	0	0.004167	0.25	0.458333	0.666667	1	0.0125	0.166667	0.325	0.554167	0.816667	0.720833	0.841667	0.883333	0.9375	0.979167	0.579167	0.317992	0.0125	0.270833	0.495833	0.7375	0.9875	0.404167
0.354015	0.368613	0.277372	0.271062	0.21978	0.208791	0.029197	0.208029	0.445255	0.686131	0.99635	0.010949	0.240876	0.514599	0.766423	1	0.00365	0.343066	0.576642	0.781022	0.985401	0.532847	0.175182	0.291971	0.07326	0.07326	0	0.00365	0.171533	0.306569	0.532847	1	0.043796	0.357664	0.507299	0.744526	0.854015	0.021898	0.572993	0.733577	0.90146	0.992701	0.481752	0.43956	0.010949	0.306569	0.569343	0.773723	0.985401	0.416058
0.343558	0.404908	0.251534	0.253086	0.179012	0.234568	0.018405	0.282209	0.558282	0.754601	0.97546	0.01227	0.171779	0.447853	0.736196	1	0.006135	0.208589	0.417178	0.687117	0.981595	0.368098	0.190184	0.441718	0.061728	0.098765	0	0.006135	0.147239	0.411043	0.668712	1	0.018405	0.055215	0.343558	0.558282	0.828221	0.134969	0.441718	0.662577	0.797546	0.98773	0.411043	0.481481	0.02454	0.233129	0.441718	0.699387	0.957055	0.503067
0.328244	0.332061	0.339695	0.187739	0.214559	0.226054	0.007634	0.244275	0.515267	0.767176	1	0.015267	0.206107	0.431298	0.71374	0.98855	0.003817	0.263359	0.48855	0.721374	0.996183	0.381679	0.187023	0.431298	0.05364	0.099617	0	0.003817	0.20229	0.423664	0.683206	1	0.125954	0.301527	0.39313	0.614504	0.71374	0.022901	0.255725	0.515267	0.832061	0.992366	0.553435	0.40613	0.030534	0.225191	0.442748	0.641221	0.98855	0.335878
0.310526	0.373684	0.315789	0.216931	0.195767	0.306878	0.042105	0.142105	0.426316	0.694737	0.973684	0.010526	0.242105	0.521053	0.726316	1	0.005263	0.294737	0.510526	0.773684	0.994737	0.373684	0.273684	0.352632	0.079365	0.100529	0.005291	0.005263	0.205263	0.531579	0.810526	1	0.142105	0.268421	0.357895	0.815789	0.931579	0.031579	0.110526	0.489474	0.7	0.863158	0.452632	0.42328	0.036842	0.278947	0.521053	0.763158	0.978947	0.389474
0.346304	0.451362	0.202335	0.269531	0.140625	0.167969	0.011673	0.256809	0.490272	0.766537	1	0.007782	0.303502	0.548638	0.801556	0.996109	0.003891	0.124514	0.420233	0.603113	0.856031	0.470817	0.151751	0.377432	0.070312	0.085938	0	0.003891	0.29572	0.513619	0.836576	1	0.015564	0.124514	0.175097	0.276265	0.828794	0.062257	0.412451	0.622568	0.731518	0.980545	0.396887	0.335938	0.019455	0.206226	0.420233	0.634241	0.964981	0.466926
0.320819	0.34471	0.334471	0.232877	0.191781	0.236301	0.013652	0.262799	0.467577	0.764505	0.996587	0.006826	0.194539	0.501706	0.706485	1	0.003413	0.245734	0.508532	0.771331	0.986348	0.443686	0.276451	0.279863	0.10274	0.054795	0.006849	0.003413	0.150171	0.406143	0.607509	1	0.010239	0.194539	0.307167	0.505119	0.699659	0.051195	0.744027	0.825939	0.914676	0.989761	0.566553	0.369863	0.006826	0.262799	0.498294	0.737201	0.982935	0.354949
0.341463	0.341463	0.317073	0.273469	0.195918	0.208163	0.00813	0.215447	0.443089	0.756098	1	0.01626	0.308943	0.528455	0.760163	0.98374	0.004065	0.235772	0.49187	0.719512	0.995935	0.390244	0.012195	0.597561	0.004082	0.142857	0.012245	0.004065	0.378049	0.544715	0.739837	1	0.414634	0.414634	0.414634	0.418699	0.49187	0.012195	0.178862	0.434959	0.752033	0.99187	0.54878	0.408163	0.01626	0.252033	0.50813	0.703252	0.98374	0.353659
0.295302	0.422819	0.281879	0.277027	0.168919	0.256757	0.073826	0.422819	0.590604	0.738255	0.986577	0.020134	0.161074	0.409396	0.758389	1	0.006711	0.234899	0.442953	0.697987	0.959732	0.61745	0.288591	0.09396	0.060811	0.02027	0.006757	0.006711	0.214765	0.510067	0.771812	1	0.33557	0.395973	0.503356	0.691275	0.818792	0.040268	0.053691	0.080537	0.825503	0.852349	0.33557	0.472973	0.040268	0.268456	0.456376	0.684564	0.926174	0.422819
0.321918	0.424658	0.253425	0.282759	0.165517	0.255172	0.020548	0.191781	0.506849	0.753425	1	0.013699	0.267123	0.493151	0.746575	0.965753	0.006849	0.253425	0.417808	0.657534	0.945205	0.527397	0.287671	0.184932	0.096552	0.027586	0	0.006849	0.130137	0.452055	0.746575	1	0.150685	0.253425	0.349315	0.684932	0.883562	0.527397	0.561644	0.609589	0.767123	0.815068	0.445205	0.344828	0.034247	0.328767	0.520548	0.719178	0.945205	0.431507
0.365854	0.300813	0.333333	0.180328	0.319672	0.213115	0.065041	0.284553	0.536585	0.780488	1	0.01626	0.211382	0.471545	0.691057	0.96748	0.00813	0.195122	0.439024	0.682927	0.99187	0.365854	0.349593	0.284553	0.098361	0.032787	0	0.00813	0.292683	0.617886	0.902439	1	0.227642	0.317073	0.430894	0.577236	0.682927	0.056911	0.113821	0.186992	0.788618	0.861789	0.471545	0.442623	0.04878	0.252033	0.487805	0.682927	0.99187	0.325203
0.328059	0.418776	0.253165	0.262936	0.149947	0.214361	0.003165	0.301688	0.521097	0.78481	1	0.00211	0.194093	0.482068	0.751055	0.996835	0.001055	0.285865	0.474684	0.709916	0.995781	0.530591	0.147679	0.32173	0.057022	0.07603	0.004224	0.001055	0.163502	0.418776	0.724684	1	0.006329	0.277426	0.501055	0.664557	0.986287	0.059072	0.380802	0.580169	0.825949	0.996835	0.456751	0.310454	0.005274	0.318565	0.514768	0.725738	0.995781	0.433544
0.346912	0.419185	0.233903	0.292105	0.180263	0.194737	0.003942	0.285151	0.538765	0.763469	1	0.002628	0.206307	0.462549	0.700394	0.998686	0.001314	0.273325	0.512484	0.767411	0.996058	0.710907	0.098555	0.190539	0.051316	0.059211	0.003947	0.001314	0.215506	0.480946	0.727989	1	0.111695	0.445466	0.578187	0.834428	0.969777	0.003942	0.34297	0.46912	0.809461	0.99343	0.403417	0.386842	0.005256	0.291721	0.532194	0.787122	0.996058	0.423127
0.365591	0.301075	0.333333	0.204545	0.273923	0.22488	0.002389	0.281959	0.53644	0.76822	0.998805	0.004779	0.222222	0.452808	0.74552	1	0.001195	0.212664	0.477897	0.732378	0.997611	0.476703	0.23178	0.291517	0.09689	0.061005	0.003589	0.001195	0.23417	0.485066	0.739546	1	0.037037	0.194743	0.41816	0.801673	0.997611	0.005974	0.309438	0.55914	0.714456	0.991637	0.549582	0.397129	0.003584	0.264038	0.474313	0.749104	0.997611	0.339307
0.377823	0.340862	0.281314	0.263374	0.193416	0.183128	0.004107	0.246407	0.505133	0.770021	0.997947	0.008214	0.250513	0.517454	0.767967	1	0.002053	0.234086	0.474333	0.698152	0.98768	0.525667	0.164271	0.310062	0.076132	0.076132	0.002058	0.002053	0.205339	0.529774	0.800821	1	0.024641	0.135524	0.474333	0.804928	0.98768	0.008214	0.36345	0.494867	0.683778	0.944559	0.466119	0.329218	0.008214	0.377823	0.511294	0.755647	0.98768	0.342916
0.372007	0.3407	0.287293	0.236866	0.213825	0.2	0.002762	0.210866	0.462247	0.744936	1	0.001842	0.237569	0.48895	0.731123	0.999079	0.000921	0.334254	0.550645	0.775322	0.994475	0.441989	0.093002	0.465009	0.042396	0.086636	0.001843	0.000921	0.190608	0.394107	0.672192	1	0.005525	0.289134	0.384899	0.569061	0.95488	0.004604	0.361878	0.609576	0.78453	0.996317	0.476059	0.337327	0.005525	0.330571	0.541436	0.757827	0.994475	0.344383
0.33945	0.376147	0.284404	0.225806	0.202765	0.262673	0.041284	0.302752	0.518349	0.779817	1	0.009174	0.233945	0.509174	0.729358	0.986239	0.004587	0.188073	0.46789	0.692661	0.90367	0.440367	0.426606	0.133028	0.119816	0.046083	0	0.004587	0.311927	0.642202	0.848624	1	0.013761	0.288991	0.440367	0.605505	0.834862	0.077982	0.105505	0.233945	0.880734	0.958716	0.422018	0.460829	0.018349	0.270642	0.440367	0.669725	0.894495	0.357798
0.257426	0.445545	0.29703	0.18543	0.188742	0.251656	0.013201	0.29703	0.50495	0.815182	1	0.006601	0.20132	0.465347	0.722772	0.9967	0.0033	0.267327	0.524752	0.716172	0.990099	0.442244	0.171617	0.386139	0.05298	0.086093	0	0.0033	0.148515	0.425743	0.712871	1	0.026403	0.339934	0.481848	0.676568	0.762376	0.115512	0.306931	0.570957	0.848185	0.993399	0.521452	0.423841	0.023102	0.287129	0.50495	0.686469	0.986799	0.471947
0.380645	0.322581	0.296774	0.230603	0.256466	0.18319	0.008602	0.283871	0.522581	0.772043	0.963441	0.015054	0.24086	0.47957	0.733333	0.997849	0.002151	0.217204	0.494624	0.737634	1	0.354839	0.083871	0.56129	0.032328	0.092672	0.002155	0.002151	0.286022	0.537634	0.789247	1	0.210753	0.27957	0.395699	0.516129	0.597849	0.004301	0.178495	0.486022	0.731183	0.954839	0.541935	0.405172	0.006452	0.260215	0.48172	0.703226	0.995699	0.412903
0.4	0.266667	0.333333	0.201681	0.252101	0.210084	0.016667	0.216667	0.516667	0.775	0.991667	0.041667	0.325	0.5	0.75	1	0.008333	0.175	0.408333	0.716667	0.916667	0.383333	0.166667	0.45	0.042017	0.092437	0.008403	0.008333	0.116667	0.341667	0.683333	1	0.266667	0.3	0.4	0.708333	0.75	0.075	0.45	0.591667	0.85	0.966667	0.441667	0.352941	0.05	0.366667	0.525	0.716667	0.95	0.166667
0.3125	0.34375	0.34375	0.231579	0.210526	0.263158	0.0625	0.291667	0.520833	0.770833	0.958333	0.020833	0.1875	0.489583	0.739583	1	0.010417	0.239583	0.46875	0.645833	0.979167	0.489583	0.385417	0.125	0.115789	0.052632	0.010526	0.010417	0.40625	0.75	0.875	1	0.125	0.25	0.447917	0.614583	0.739583	0.03125	0.052083	0.083333	0.333333	0.364583	0.541667	0.336842	0.052083	0.270833	0.416667	0.65625	0.979167	0.375
0.364217	0.36262	0.273163	0.2432	0.1792	0.2016	0.01278	0.180511	0.460064	0.785942	0.996805	0.003195	0.238019	0.461661	0.693291	0.998403	0.001597	0.367412	0.565495	0.755591	1	0.5623	0.123003	0.314696	0.0448	0.0832	0.0064	0.001597	0.167732	0.322684	0.672524	1	0.28754	0.536741	0.65655	0.803514	0.884984	0.031949	0.397764	0.578275	0.779553	0.996805	0.448882	0.3072	0.022364	0.391374	0.552716	0.761981	0.995208	0.42492
0.316312	0.419858	0.26383	0.235795	0.176136	0.203125	0.002837	0.2	0.492199	0.741844	0.998582	0.004255	0.249645	0.476596	0.780142	1	0.001418	0.286525	0.539007	0.73617	0.982979	0.607092	0.15461	0.238298	0.066761	0.066761	0.007102	0.001418	0.228369	0.446809	0.780142	1	0.038298	0.324823	0.631206	0.714894	0.98156	0.008511	0.248227	0.519149	0.726241	0.950355	0.507801	0.440341	0.009929	0.273759	0.52766	0.734752	0.984397	0.41844
0.519048	0.309524	0.171429	0.358852	0.196172	0.105263	0.014286	0.338095	0.604762	0.8	0.995238	0.009524	0.22381	0.404762	0.62381	1	0.004762	0.157143	0.357143	0.595238	0.980952	0.690476	0.142857	0.166667	0.047847	0.028708	0.009569	0.004762	0.480952	0.652381	0.82381	1	0.028571	0.057143	0.247619	0.309524	0.452381	0.090476	0.12381	0.166667	0.37619	0.433333	0.238095	0.191388	0.033333	0.119048	0.252381	0.357143	0.447619	0.328571
0.360424	0.286219	0.353357	0.205674	0.241135	0.202128	0.007067	0.24735	0.526502	0.812721	0.992933	0.014134	0.279152	0.512367	0.731449	1	0.003534	0.226148	0.459364	0.696113	0.968198	0.409894	0.176678	0.413428	0.06383	0.092199	0	0.003534	0.190813	0.44523	0.696113	1	0.123675	0.289753	0.540636	0.583039	0.975265	0.024735	0.243816	0.4947	0.787986	0.939929	0.551237	0.397163	0.014134	0.229682	0.466431	0.664311	0.992933	0.286219
0.34188	0.32906	0.32906	0.236052	0.236052	0.240343	0.025641	0.299145	0.508547	0.75641	0.995726	0.008547	0.15812	0.461538	0.679487	1	0.004274	0.252137	0.470085	0.747863	0.991453	0.461538	0.376068	0.162393	0.137339	0.034335	0	0.004274	0.153846	0.495726	0.75641	1	0.115385	0.444444	0.606838	0.82906	0.978632	0.025641	0.17094	0.213675	0.260684	0.512821	0.525641	0.377682	0.017094	0.277778	0.521368	0.764957	0.978632	0.299145
0.378007	0.257732	0.364261	0.2	0.275862	0.17931	0.006873	0.316151	0.553265	0.742268	0.975945	0.010309	0.158076	0.38488	0.745704	0.993127	0.003436	0.278351	0.501718	0.735395	1	0.381443	0.268041	0.350515	0.072414	0.051724	0.003448	0.003436	0.216495	0.446735	0.752577	1	0.013746	0.182131	0.522337	0.783505	0.955326	0.054983	0.274914	0.491409	0.67354	0.910653	0.573883	0.337931	0.010309	0.199313	0.43299	0.714777	0.989691	0.278351
0.396667	0.256667	0.346667	0.207358	0.230769	0.19398	0.01	0.276667	0.493333	0.74	1	0.016667	0.193333	0.476667	0.75	0.986667	0.003333	0.266667	0.5	0.76	0.993333	0.403333	0.25	0.346667	0.073579	0.053512	0	0.003333	0.203333	0.483333	0.7	1	0.02	0.18	0.5	0.77	0.933333	0.06	0.336667	0.536667	0.68	0.976667	0.556667	0.354515	0.016667	0.21	0.466667	0.71	0.986667	0.253333
0.364469	0.302198	0.333333	0.218349	0.269725	0.19633	0.005495	0.25641	0.489011	0.760073	0.996337	0.007326	0.203297	0.446886	0.736264	0.998168	0.001832	0.287546	0.529304	0.747253	1	0.342491	0.087912	0.569597	0.034862	0.104587	0.005505	0.001832	0.254579	0.470696	0.727106	1	0.043956	0.197802	0.239927	0.267399	0.377289	0.003663	0.362637	0.564103	0.800366	0.994505	0.569597	0.418349	0.003663	0.260073	0.483516	0.738095	0.998168	0.309524
0.348659	0.409962	0.241379	0.292308	0.165385	0.176923	0.011494	0.245211	0.505747	0.766284	1	0.007663	0.226054	0.51341	0.770115	0.961686	0.003831	0.241379	0.409962	0.670498	0.977011	0.643678	0.291188	0.065134	0.169231	0.030769	0	0.003831	0.275862	0.505747	0.804598	1	0.015326	0.176245	0.337165	0.56705	0.992337	0.666667	0.697318	0.712644	0.770115	0.796935	0.498084	0.284615	0.049808	0.283525	0.452107	0.685824	0.984674	0.383142
0.446009	0.29108	0.262911	0.207547	0.264151	0.150943	0.00939	0.253521	0.478873	0.71831	0.995305	0.014085	0.328638	0.605634	0.816901	0.985915	0.004695	0.206573	0.408451	0.652582	1	0.516432	0.234742	0.248826	0.108491	0.042453	0.014151	0.004695	0.328638	0.525822	0.769953	1	0.032864	0.253521	0.384977	0.877934	0.948357	0.014085	0.103286	0.43662	0.58216	0.694836	0.262911	0.320755	0.018779	0.15493	0.356808	0.633803	0.938967	0.28169
0.408318	0.302457	0.289225	0.227273	0.236742	0.185606	0.020794	0.238185	0.470699	0.73724	1	0.003781	0.293006	0.514178	0.776938	0.994329	0.00189	0.234405	0.512287	0.73535	0.996219	0.190926	0.069943	0.73913	0.022727	0.05303	0.003788	0.00189	0.480151	0.714556	0.829868	1	0.410208	0.470699	0.886578	0.969754	0.988658	0.009452	0.190926	0.379962	0.671078	0.952741	0.47259	0.401515	0.007561	0.383743	0.597353	0.780718	0.984877	0.293006
0.356209	0.398693	0.245098	0.291803	0.157377	0.22623	0.006536	0.271242	0.5	0.751634	1	0.009804	0.24183	0.53268	0.781046	0.996732	0.003268	0.232026	0.447712	0.669935	0.980392	0.565359	0.169935	0.264706	0.068852	0.068852	0.003279	0.003268	0.20915	0.398693	0.702614	1	0.101307	0.156863	0.447712	0.578431	0.869281	0.01634	0.519608	0.696078	0.908497	0.977124	0.418301	0.367213	0.019608	0.248366	0.473856	0.650327	0.990196	0.401961
0.30719	0.411765	0.281046	0.246725	0.174672	0.251092	0.013072	0.211329	0.448802	0.762527	1	0.004357	0.261438	0.488017	0.740741	0.997821	0.002179	0.239651	0.533769	0.727669	0.984749	0.457516	0.082789	0.459695	0.045852	0.080786	0.002183	0.002179	0.206972	0.359477	0.636166	1	0.04793	0.163399	0.389978	0.6122	0.884532	0.010893	0.444444	0.594771	0.840959	0.989107	0.498911	0.379913	0.017429	0.331155	0.590414	0.736383	0.986928	0.420479
0.312727	0.363636	0.323636	0.255474	0.189781	0.215328	0.010909	0.232727	0.534545	0.76	0.996364	0.007273	0.207273	0.421818	0.672727	1	0.003636	0.290909	0.592727	0.781818	0.989091	0.527273	0.323636	0.149091	0.124088	0.036496	0	0.003636	0.178182	0.458182	0.68	1	0.098182	0.298182	0.443636	0.643636	0.869091	0.032727	0.789091	0.909091	0.952727	0.992727	0.56	0.328467	0.018182	0.294545	0.52	0.763636	0.989091	0.418182
0.325472	0.377358	0.29717	0.241706	0.189573	0.2891	0.028302	0.339623	0.589623	0.759434	1	0.009434	0.193396	0.410377	0.754717	0.995283	0.004717	0.179245	0.481132	0.693396	0.966981	0.580189	0.226415	0.193396	0.085308	0.066351	0	0.004717	0.188679	0.542453	0.778302	1	0.051887	0.283019	0.367925	0.811321	0.886792	0.014151	0.240566	0.415094	0.679245	0.79717	0.448113	0.388626	0.014151	0.283019	0.617925	0.806604	0.966981	0.377358
0.278873	0.51831	0.202817	0.274011	0.081921	0.251412	0.011268	0.143662	0.338028	0.732394	0.988732	0.005634	0.301408	0.495775	0.757746	0.994366	0.002817	0.346479	0.543662	0.723944	1	0.895775	0.033803	0.070423	0.028249	0.028249	0	0.002817	0.301408	0.538028	0.769014	1	0.016901	0.022535	0.498592	0.55493	0.95493	0.053521	0.101408	0.11831	0.250704	0.974648	0.388732	0.389831	0.016901	0.411268	0.552113	0.749296	0.983099	0.509859
0.289474	0.479532	0.230994	0.243402	0.173021	0.184751	0.035088	0.292398	0.52924	0.815789	0.997076	0.005848	0.254386	0.552632	0.710526	0.994152	0.002924	0.154971	0.347953	0.777778	1	0.532164	0.195906	0.27193	0.070381	0.064516	0	0.002924	0.207602	0.517544	0.725146	1	0.076023	0.365497	0.494152	0.842105	0.97076	0.008772	0.22807	0.461988	0.657895	0.929825	0.435673	0.375367	0.011696	0.295322	0.502924	0.760234	0.973684	0.491228
0.323529	0.433824	0.242647	0.276753	0.151292	0.214022	0.011029	0.183824	0.463235	0.720588	0.996324	0.007353	0.216912	0.518382	0.779412	1	0.003676	0.330882	0.503676	0.713235	0.974265	0.363971	0.099265	0.536765	0.02952	0.103321	0	0.003676	0.102941	0.279412	0.709559	1	0.507353	0.801471	0.841912	0.875	0.900735	0.051471	0.327206	0.496324	0.661765	0.963235	0.452206	0.309963	0.018382	0.3125	0.481618	0.669118	0.966912	0.470588
0.344985	0.369301	0.285714	0.270928	0.191781	0.191781	0.004559	0.232523	0.466565	0.740122	0.99696	0.007599	0.217325	0.515198	0.756839	0.99848	0.00152	0.288754	0.510638	0.727964	1	0.489362	0.133739	0.3769	0.039574	0.073059	0.009132	0.00152	0.158055	0.474164	0.787234	1	0.004559	0.303951	0.484802	0.600304	0.75228	0.010638	0.325228	0.566869	0.772036	0.908815	0.50304	0.374429	0.00304	0.276596	0.486322	0.712766	0.993921	0.395137
0.342105	0.37218	0.285714	0.25283	0.2	0.188679	0.007519	0.240602	0.507519	0.781955	0.988722	0.011278	0.225564	0.496241	0.759398	1	0.003759	0.278195	0.469925	0.661654	0.966165	0.413534	0.078947	0.507519	0.030189	0.090566	0	0.003759	0.109023	0.451128	0.75188	1	0.473684	0.774436	0.819549	0.838346	0.868421	0.052632	0.296992	0.458647	0.642857	0.954887	0.466165	0.34717	0.030075	0.278195	0.466165	0.650376	0.947368	0.424812
0.41791	0.313433	0.268657	0.263158	0.218045	0.180451	0.037313	0.261194	0.514925	0.813433	0.985075	0.022388	0.201493	0.462687	0.701493	1	0.007463	0.216418	0.477612	0.69403	0.992537	0.402985	0.268657	0.328358	0.135338	0.075188	0.015038	0.007463	0.298507	0.514925	0.686567	1	0.19403	0.373134	0.5	0.656716	0.985075	0.044776	0.141791	0.268657	0.850746	0.932836	0.335821	0.421053	0.104478	0.313433	0.5	0.69403	0.895522	0.30597
0.337449	0.358025	0.304527	0.285124	0.210744	0.202479	0.012346	0.201646	0.530864	0.773663	0.987654	0.00823	0.230453	0.481481	0.707819	0.995885	0.004115	0.288066	0.465021	0.736626	1	0.534979	0.209877	0.255144	0.057851	0.066116	0.016529	0.004115	0.152263	0.320988	0.621399	1	0.08642	0.36214	0.502058	0.740741	0.995885	0.242798	0.427984	0.658436	0.835391	0.950617	0.469136	0.31405	0.061728	0.308642	0.534979	0.728395	0.99177	0.374486
0.413462	0.311298	0.27524	0.202166	0.198556	0.20698	0.00601	0.183894	0.469952	0.786058	1	0.003606	0.269231	0.502404	0.716346	0.992788	0.001202	0.319712	0.550481	0.746394	0.987981	0.498798	0.122596	0.378606	0.048135	0.079422	0.00722	0.001202	0.140625	0.336538	0.645433	1	0.078125	0.371394	0.557692	0.670673	0.987981	0.010817	0.391827	0.649038	0.828125	0.984375	0.430288	0.305656	0.032452	0.292067	0.504808	0.697115	0.987981	0.347356
0.279245	0.366038	0.354717	0.200758	0.231061	0.238636	0.026415	0.271698	0.464151	0.773585	0.996226	0.007547	0.181132	0.498113	0.720755	0.984906	0.003774	0.283019	0.520755	0.724528	1	0.418868	0.29434	0.286792	0.087121	0.041667	0.003788	0.003774	0.207547	0.50566	0.690566	1	0.124528	0.222642	0.460377	0.713208	0.856604	0.018868	0.362264	0.539623	0.920755	0.992453	0.566038	0.386364	0.011321	0.267925	0.509434	0.728302	0.988679	0.388679
0.280236	0.415929	0.303835	0.195266	0.174556	0.278107	0.061947	0.297935	0.530973	0.79646	1	0.0059	0.168142	0.457227	0.687316	0.99705	0.00295	0.271386	0.504425	0.716814	0.967552	0.389381	0.162242	0.448378	0.079882	0.10355	0.008876	0.00295	0.174041	0.389381	0.743363	1	0.017699	0.235988	0.386431	0.542773	0.761062	0.014749	0.351032	0.648968	0.820059	0.970501	0.681416	0.319527	0.00885	0.241888	0.516224	0.719764	0.99705	0.442478
0.380109	0.450272	0.169619	0.33606	0.137014	0.126108	0.004087	0.192779	0.489782	0.740463	0.998638	0.001362	0.236376	0.467984	0.717302	0.996594	0.000681	0.384196	0.617166	0.83515	1	0.700272	0.105586	0.194142	0.047716	0.062713	0.006817	0.000681	0.21594	0.469346	0.737057	1	0.042916	0.356267	0.540191	0.923706	0.982289	0.020436	0.322888	0.56267	0.69891	0.936649	0.344005	0.339468	0.006812	0.371253	0.586512	0.846049	0.997275	0.465259
0.427711	0.355422	0.216867	0.260606	0.169697	0.163636	0.03012	0.319277	0.572289	0.777108	1	0.012048	0.210843	0.493976	0.807229	0.993976	0.006024	0.174699	0.36747	0.536145	0.879518	0.554217	0.174699	0.271084	0.060606	0.060606	0.012121	0.006024	0.343373	0.722892	0.861446	1	0.024096	0.060241	0.295181	0.373494	0.554217	0.096386	0.156627	0.433735	0.518072	0.710843	0.445783	0.387879	0.024096	0.222892	0.433735	0.753012	0.975904	0.39759
0.378788	0.363636	0.257576	0.384615	0.215385	0.138462	0.045455	0.19697	0.484848	0.666667	1	0.030303	0.272727	0.469697	0.681818	0.984848	0.015152	0.212121	0.378788	0.757576	0.939394	0.515152	0.212121	0.272727	0.076923	0.076923	0.015385	0.015152	0.272727	0.5	0.666667	1	0.19697	0.227273	0.348485	0.393939	0.772727	0.106061	0.151515	0.621212	0.848485	0.924242	0.318182	0.369231	0.136364	0.257576	0.378788	0.757576	0.939394	0.348485
0.379705	0.333879	0.286416	0.211475	0.213115	0.185246	0.00982	0.247136	0.479542	0.728314	1	0.003273	0.237316	0.513912	0.782324	0.99509	0.001637	0.256956	0.500818	0.736498	0.996727	0.481178	0.212766	0.306056	0.091803	0.068852	0.003279	0.001637	0.212766	0.479542	0.746318	1	0.006547	0.201309	0.404255	0.649755	0.944354	0.070376	0.376432	0.585925	0.833061	0.991817	0.443535	0.337705	0.006547	0.268412	0.543372	0.762684	0.996727	0.322422
0.302041	0.412245	0.285714	0.237705	0.20082	0.221311	0.020408	0.191837	0.42449	0.75102	1	0.008163	0.244898	0.485714	0.714286	0.995918	0.004082	0.289796	0.567347	0.771429	0.991837	0.485714	0.257143	0.257143	0.07377	0.065574	0	0.004082	0.232653	0.379592	0.677551	1	0.089796	0.187755	0.497959	0.673469	0.820408	0.012245	0.461224	0.722449	0.902041	0.987755	0.595918	0.344262	0.016327	0.306122	0.530612	0.722449	0.991837	0.440816
0.349206	0.392416	0.258377	0.269197	0.172992	0.203883	0.002646	0.250441	0.516755	0.77866	1	0.001764	0.22134	0.492063	0.76455	0.998236	0.000882	0.263668	0.477072	0.687831	0.989418	0.600529	0.13933	0.260141	0.067961	0.064431	0.004413	0.000882	0.208995	0.511464	0.75485	1	0.034392	0.382716	0.529982	0.708995	0.935626	0.008818	0.236332	0.371252	0.783069	0.989418	0.492945	0.372462	0.008818	0.203704	0.442681	0.671958	0.992945	0.385362
0.314488	0.353357	0.332155	0.234043	0.219858	0.244681	0.010601	0.282686	0.597173	0.809187	0.996466	0.007067	0.243816	0.466431	0.738516	1	0.003534	0.212014	0.434629	0.628975	0.985866	0.533569	0.332155	0.134276	0.113475	0.042553	0.014184	0.003534	0.293286	0.611307	0.826855	1	0.021201	0.257951	0.399293	0.572438	0.968198	0.045936	0.088339	0.469965	0.696113	0.742049	0.452297	0.411348	0.014134	0.261484	0.448763	0.600707	0.992933	0.416961
0.353333	0.295556	0.351111	0.207127	0.25167	0.207127	0.006667	0.217778	0.475556	0.755556	0.971111	0.008889	0.3	0.522222	0.76	0.997778	0.002222	0.222222	0.486667	0.728889	1	0.351111	0.08	0.568889	0.028953	0.100223	0.002227	0.002222	0.251111	0.533333	0.784444	1	0.222222	0.295556	0.477778	0.544444	0.626667	0.004444	0.184444	0.504444	0.755556	0.96	0.54	0.4098	0.004444	0.264444	0.488889	0.677778	0.995556	0.333333
0.392	0.296	0.312	0.224449	0.260521	0.194389	0.004	0.232	0.466	0.744	0.998	0.014	0.302	0.532	0.752	1	0.002	0.252	0.506	0.748	0.992	0.39	0.194	0.416	0.058116	0.078156	0.006012	0.002	0.174	0.358	0.65	1	0.09	0.28	0.38	0.482	0.782	0.04	0.432	0.706	0.846	0.986	0.496	0.428858	0.01	0.282	0.51	0.75	0.992	0.37
0.411111	0.244444	0.344444	0.213483	0.280899	0.202247	0.044444	0.211111	0.511111	0.733333	0.977778	0.022222	0.222222	0.5	0.744444	1	0.011111	0.233333	0.411111	0.7	0.988889	0.3	0.344444	0.355556	0.078652	0.033708	0.011236	0.011111	0.066667	0.177778	0.811111	1	0.088889	0.411111	0.733333	0.888889	0.977778	0.188889	0.266667	0.5	0.588889	0.677778	0.444444	0.404494	0.033333	0.266667	0.433333	0.711111	0.955556	0.255556
0.376623	0.272727	0.350649	0.184211	0.328947	0.184211	0.064935	0.207792	0.532468	0.714286	1	0.168831	0.363636	0.467532	0.74026	0.974026	0.012987	0.12987	0.376623	0.636364	0.948052	0.311688	0.272727	0.415584	0.105263	0.052632	0	0.012987	0.25974	0.428571	0.597403	1	0.051948	0.376623	0.493506	0.558442	0.675325	0.090909	0.181818	0.766234	0.87013	0.974026	0.441558	0.421053	0.051948	0.233766	0.493506	0.662338	0.948052	0.272727
0.440329	0.304527	0.255144	0.256198	0.239669	0.140496	0.016461	0.185185	0.37037	0.674897	0.995885	0.00823	0.251029	0.539095	0.765432	0.958848	0.004115	0.366255	0.567901	0.761317	1	0.526749	0.168724	0.304527	0.066116	0.090909	0.008264	0.004115	0.18107	0.316872	0.641975	1	0.382716	0.44856	0.506173	0.687243	0.765432	0.020576	0.374486	0.604938	0.876543	0.967078	0.44856	0.355372	0.061728	0.473251	0.666667	0.798354	0.987654	0.333333
0.330144	0.330144	0.339713	0.232614	0.247002	0.230216	0.014354	0.244019	0.483254	0.739234	0.997608	0.004785	0.241627	0.511962	0.755981	1	0.002392	0.258373	0.504785	0.712919	0.992823	0.394737	0.148325	0.456938	0.06235	0.091127	0.004796	0.002392	0.222488	0.538278	0.80622	1	0.08134	0.282297	0.516746	0.906699	0.961722	0.009569	0.244019	0.421053	0.669856	0.866029	0.569378	0.364508	0.009569	0.239234	0.452153	0.698565	0.992823	0.349282
0.371648	0.310345	0.318008	0.191939	0.25144	0.211132	0.007663	0.249042	0.503831	0.798851	1	0.003831	0.226054	0.522989	0.747126	0.994253	0.001916	0.254789	0.471264	0.691571	0.992337	0.519157	0.116858	0.363985	0.047985	0.06334	0.005758	0.001916	0.283525	0.613027	0.862069	1	0.113027	0.237548	0.632184	0.747126	0.952107	0.005747	0.176245	0.371648	0.570881	0.954023	0.534483	0.349328	0.009579	0.254789	0.434866	0.641762	0.984674	0.333333
0.358333	0.354167	0.2875	0.284519	0.179916	0.225941	0.0125	0.208333	0.4625	0.791667	1	0.008333	0.325	0.5625	0.779167	0.991667	0.004167	0.216667	0.3875	0.625	0.9625	0.275	0.116667	0.608333	0.037657	0.121339	0.004184	0.004167	0.141667	0.391667	0.725	1	0.133333	0.758333	0.804167	0.841667	0.870833	0.029167	0.254167	0.479167	0.633333	0.983333	0.483333	0.343096	0.020833	0.220833	0.420833	0.620833	0.945833	0.3125
0.329082	0.42602	0.244898	0.255754	0.153453	0.196931	0.010204	0.247449	0.408163	0.719388	0.969388	0.005102	0.331633	0.540816	0.790816	1	0.002551	0.196429	0.431122	0.709184	0.997449	0.553571	0.145408	0.30102	0.061381	0.066496	0.005115	0.002551	0.32398	0.538265	0.80102	1	0.081633	0.135204	0.454082	0.704082	0.84949	0.015306	0.221939	0.367347	0.729592	0.987245	0.471939	0.373402	0.012755	0.239796	0.5	0.790816	0.997449	0.469388
0.293403	0.374132	0.332465	0.212858	0.19722	0.259774	0.005208	0.18316	0.479167	0.724826	0.997396	0.001736	0.261285	0.500868	0.74566	0.999132	0.000868	0.27691	0.510417	0.767361	1	0.463542	0.131944	0.404514	0.054735	0.068636	0.000869	0.000868	0.232639	0.488715	0.776042	1	0.127604	0.228299	0.554688	0.802951	0.994792	0.015625	0.280382	0.503472	0.736979	0.985243	0.540799	0.385752	0.007812	0.289931	0.511285	0.749132	0.998264	0.384549
0.433333	0.327381	0.239286	0.280095	0.1764	0.16329	0.004762	0.205952	0.466667	0.8	1	0.002381	0.27619	0.464286	0.733333	0.99881	0.00119	0.385714	0.557143	0.719048	0.991667	0.560714	0.105952	0.333333	0.039333	0.082241	0.003576	0.00119	0.17619	0.345238	0.732143	1	0.014286	0.470238	0.597619	0.704762	0.795238	0.036905	0.415476	0.582143	0.807143	0.997619	0.392857	0.297974	0.008333	0.40119	0.536905	0.709524	0.964286	0.392857
0.414894	0.212766	0.37234	0.193548	0.354839	0.150538	0.031915	0.159574	0.478723	0.723404	1	0.170213	0.265957	0.489362	0.755319	0.957447	0.010638	0.212766	0.468085	0.744681	0.93617	0.425532	0.574468	0	0.172043	0	0	0.010638	0.234043	0.5	0.744681	1	0.031915	0.265957	0.468085	0.659574	0.93617	0	0	0	0	0	0.425532	0.387097	0.042553	0.297872	0.542553	0.840426	0.946809	0.191489
0.369067	0.356792	0.274141	0.235872	0.231777	0.185094	0.002455	0.269231	0.536825	0.761866	1	0.001637	0.205401	0.461538	0.729133	0.997545	0.000818	0.261866	0.489362	0.747136	0.998363	0.425532	0.202946	0.371522	0.09828	0.070434	0.001638	0.000818	0.180033	0.45581	0.729951	1	0.013912	0.272504	0.488543	0.716858	0.984452	0.026187	0.306874	0.566285	0.788052	0.998363	0.404255	0.484848	0.006547	0.273322	0.521277	0.759411	0.998363	0.376432
0.38746	0.342444	0.270096	0.256039	0.247987	0.175523	0.004823	0.22508	0.488746	0.747588	1	0.003215	0.284566	0.533762	0.755627	0.996785	0.001608	0.228296	0.474277	0.729904	0.995177	0.379421	0.036977	0.583601	0.020934	0.059581	0.00161	0.001608	0.233119	0.59164	0.869775	1	0.118971	0.35209	0.432476	0.824759	0.885852	0.030547	0.249196	0.477492	0.667203	0.9791	0.442122	0.386473	0.022508	0.247588	0.491961	0.696141	0.993569	0.368167
0.442953	0.248322	0.308725	0.202703	0.290541	0.148649	0.020134	0.322148	0.449664	0.724832	1	0.013423	0.187919	0.456376	0.657718	0.993289	0.006711	0.214765	0.536913	0.791946	0.986577	0.322148	0.302013	0.375839	0.121622	0.054054	0.013514	0.006711	0.167785	0.577181	0.765101	1	0.026846	0.261745	0.624161	0.885906	0.986577	0.060403	0.322148	0.416107	0.510067	0.832215	0.402685	0.5	0.026846	0.221477	0.536913	0.758389	0.979866	0.275168
0.369892	0.331183	0.298925	0.243534	0.226293	0.193966	0.008602	0.230108	0.492473	0.8	0.993548	0.006452	0.268817	0.505376	0.731183	1	0.002151	0.232258	0.47957	0.703226	0.948387	0.384946	0.083871	0.531183	0.036638	0.105603	0.002155	0.002151	0.221505	0.391398	0.780645	1	0.064516	0.176344	0.251613	0.313978	0.417204	0.006452	0.402151	0.591398	0.76129	0.948387	0.541935	0.362069	0.004301	0.260215	0.47957	0.703226	0.948387	0.344086
0.42953	0.278523	0.291946	0.23569	0.272727	0.16835	0.02349	0.308725	0.533557	0.704698	1	0.006711	0.167785	0.385906	0.788591	0.996644	0.003356	0.218121	0.489933	0.771812	0.993289	0.45302	0.137584	0.409396	0.070707	0.077441	0.003367	0.003356	0.177852	0.446309	0.731544	1	0.010067	0.211409	0.768456	0.88255	0.993289	0.053691	0.302013	0.5	0.61745	0.942953	0.426174	0.383838	0.013423	0.211409	0.40604	0.778523	0.993289	0.281879
0.384712	0.270677	0.344612	0.205772	0.292346	0.200753	0.007519	0.263158	0.501253	0.756892	1	0.005013	0.236842	0.483709	0.734336	0.994987	0.001253	0.240602	0.508772	0.746867	0.997494	0.463659	0.241855	0.294486	0.105395	0.055207	0.002509	0.001253	0.23183	0.483709	0.739348	1	0.038847	0.197995	0.41604	0.795739	0.997494	0.006266	0.319549	0.541353	0.703008	0.992481	0.570175	0.409034	0.003759	0.264411	0.47619	0.741855	0.997494	0.303258
0.361963	0.343558	0.294479	0.185185	0.185185	0.265432	0.018405	0.190184	0.429448	0.668712	0.98773	0.01227	0.263804	0.582822	0.785276	1	0.006135	0.257669	0.546012	0.766871	0.981595	0.361963	0.104294	0.533742	0.037037	0.08642	0	0.006135	0.08589	0.263804	0.674847	1	0.527607	0.546012	0.705521	0.822086	0.852761	0.122699	0.337423	0.478528	0.760736	0.98773	0.460123	0.358025	0.03681	0.361963	0.588957	0.754601	0.97546	0.349693
0.344928	0.321739	0.333333	0.22061	0.243832	0.217707	0.004348	0.257971	0.517391	0.769565	0.991304	0.002899	0.211594	0.468116	0.713043	0.995652	0.001449	0.266667	0.515942	0.750725	1	0.401449	0.205797	0.392754	0.089985	0.063861	0.011611	0.001449	0.302899	0.508696	0.805797	1	0.005797	0.202899	0.434783	0.830435	0.998551	0.028986	0.201449	0.52029	0.649275	0.952174	0.562319	0.409289	0.007246	0.265217	0.488406	0.718841	0.997101	0.328986
0.328592	0.361309	0.3101	0.270655	0.19943	0.252137	0.008535	0.28734	0.524893	0.780939	0.995733	0.002845	0.201991	0.450925	0.69559	1	0.001422	0.27596	0.523471	0.761024	0.998578	0.409673	0.186344	0.403983	0.086895	0.066952	0.007123	0.001422	0.302987	0.499289	0.796586	1	0.009957	0.186344	0.418208	0.890469	0.997155	0.032717	0.278805	0.550498	0.687055	0.927454	0.536273	0.378917	0.01138	0.26458	0.480797	0.708393	0.998578	0.376956
0.278245	0.489183	0.232572	0.243536	0.129886	0.230307	0.002404	0.246394	0.461538	0.798077	1	0.001202	0.278846	0.527043	0.740986	0.996394	0.000601	0.218149	0.451322	0.701322	0.998798	0.798077	0.061899	0.140024	0.036681	0.039086	0.003007	0.000601	0.289062	0.507212	0.715745	1	0.03125	0.220553	0.719952	0.859375	0.971154	0.001803	0.092548	0.28726	0.846154	0.998798	0.291466	0.340349	0.007212	0.167067	0.413462	0.751803	0.998798	0.521034
0.392321	0.305509	0.30217	0.250836	0.225753	0.190635	0.021703	0.228715	0.465776	0.737896	1	0.005008	0.230384	0.504174	0.786311	0.998331	0.001669	0.287145	0.517529	0.729549	0.996661	0.347245	0.038397	0.614357	0.018395	0.091973	0.005017	0.001669	0.328881	0.616027	0.891486	1	0.006678	0.016694	0.131886	0.434057	0.813022	0.026711	0.24374	0.492487	0.686144	0.994992	0.462437	0.367893	0.005008	0.235392	0.470785	0.702838	0.996661	0.307179
0.362538	0.380665	0.256798	0.212121	0.19697	0.218182	0.009063	0.256798	0.510574	0.731118	1	0.006042	0.220544	0.564955	0.81571	0.996979	0.003021	0.223565	0.444109	0.628399	0.993958	0.63142	0.120846	0.247734	0.066667	0.072727	0	0.003021	0.199396	0.58006	0.803625	1	0.132931	0.268882	0.347432	0.833837	0.990937	0.072508	0.314199	0.483384	0.555891	0.691843	0.480363	0.406061	0.012085	0.265861	0.477341	0.734139	0.993958	0.350453
0.419094	0.326861	0.254045	0.246353	0.19611	0.171799	0.006472	0.173139	0.377023	0.731392	1	0.003236	0.323625	0.555016	0.770227	0.995146	0.001618	0.33657	0.532362	0.736246	0.982201	0.524272	0.090615	0.385113	0.038898	0.08752	0	0.001618	0.174757	0.490291	0.822006	1	0.440129	0.564725	0.650485	0.771845	0.886731	0.027508	0.286408	0.415858	0.665049	0.977346	0.438511	0.311183	0.021036	0.346278	0.543689	0.695793	0.988673	0.375405
0.388704	0.303987	0.307309	0.219634	0.242928	0.1797	0.003322	0.275748	0.516611	0.795681	0.998339	0.004983	0.237542	0.503322	0.715947	0.993355	0.001661	0.217608	0.453488	0.717608	1	0.503322	0.181063	0.315615	0.071547	0.058236	0.001664	0.001661	0.260797	0.538206	0.770764	1	0.038206	0.164452	0.475083	0.60299	0.976744	0.066445	0.249169	0.430233	0.807309	0.975083	0.501661	0.339434	0.006645	0.222591	0.465116	0.709302	0.996678	0.322259
0.455128	0.294872	0.25	0.303226	0.206452	0.122581	0.044872	0.301282	0.564103	0.782051	1	0.032051	0.179487	0.532051	0.717949	0.974359	0.00641	0.134615	0.403846	0.557692	0.935897	0.423077	0.166667	0.410256	0.077419	0.103226	0.012903	0.00641	0.352564	0.698718	0.871795	1	0.012821	0.237179	0.314103	0.512821	0.935897	0.044872	0.141026	0.423077	0.641026	0.839744	0.301282	0.309677	0.012821	0.179487	0.339744	0.480769	0.897436	0.269231
0.314721	0.527919	0.15736	0.346939	0.107143	0.112245	0.030457	0.238579	0.532995	0.71066	1	0.010152	0.284264	0.563452	0.80203	0.994924	0.005076	0.15736	0.28934	0.482234	0.857868	0.375635	0.248731	0.375635	0.035714	0.066327	0.015306	0.005076	0.253807	0.746193	0.888325	1	0.06599	0.411168	0.472081	0.543147	0.86802	0.055838	0.218274	0.340102	0.695431	0.969543	0.335025	0.326531	0.06599	0.19797	0.340102	0.497462	0.923858	0.548223
0.365482	0.286802	0.347716	0.190597	0.287166	0.205845	0.002538	0.255076	0.517766	0.738579	0.998731	0.005076	0.239848	0.472081	0.756345	0.993655	0.001269	0.244924	0.496193	0.743655	1	0.468274	0.238579	0.293147	0.105464	0.062262	0.003812	0.001269	0.204315	0.44797	0.733503	1	0.03934	0.248731	0.423858	0.813452	0.998731	0.006345	0.322335	0.576142	0.706853	0.991117	0.567259	0.404066	0.003807	0.261421	0.475888	0.742386	0.997462	0.319797
0.376623	0.285714	0.337662	0.200521	0.265625	0.195312	0.005195	0.184416	0.418182	0.724675	1	0.023377	0.335065	0.522078	0.742857	0.98961	0.002597	0.212987	0.501299	0.753247	0.997403	0.371429	0.228571	0.4	0.088542	0.072917	0	0.002597	0.288312	0.480519	0.792208	1	0.01039	0.187013	0.387013	0.607792	0.994805	0.051948	0.238961	0.581818	0.768831	0.979221	0.602597	0.411458	0.01039	0.301299	0.509091	0.742857	0.997403	0.322078
0.398148	0.25	0.351852	0.186916	0.271028	0.242991	0.018519	0.203704	0.518519	0.768519	1	0.074074	0.185185	0.407407	0.657407	0.925926	0.009259	0.259259	0.490741	0.740741	0.990741	0.361111	0.194444	0.444444	0.074766	0.056075	0	0.009259	0.175926	0.324074	0.777778	1	0.055556	0.268519	0.37037	0.416667	0.759259	0.101852	0.462963	0.574074	0.842593	0.953704	0.481481	0.373832	0.064815	0.305556	0.5	0.722222	0.962963	0.231481
0.313997	0.330391	0.355612	0.195707	0.25	0.248737	0.002522	0.257251	0.515763	0.766709	1	0.005044	0.248424	0.489281	0.708701	0.993695	0.001261	0.237074	0.498108	0.750315	0.997478	0.455233	0.249685	0.295082	0.10101	0.05303	0.002525	0.001261	0.209332	0.461538	0.740227	1	0.039092	0.200504	0.421185	0.796974	0.997478	0.006305	0.320303	0.544767	0.704918	0.992434	0.572509	0.411616	0.003783	0.25599	0.474149	0.728878	0.997478	0.354351
0.355694	0.297972	0.346334	0.173437	0.239063	0.23125	0.0078	0.24337	0.471139	0.769111	0.99532	0.00468	0.25117	0.519501	0.703588	1	0.00156	0.24805	0.50858	0.764431	0.99844	0.308892	0.102964	0.588144	0.0375	0.084375	0.003125	0.00156	0.266771	0.541342	0.795632	1	0.082683	0.232449	0.687988	0.865835	0.926677	0.00624	0.25273	0.444618	0.664587	0.9922	0.51014	0.415625	0.00312	0.25741	0.514821	0.74103	0.99064	0.318253
0.431193	0.238532	0.330275	0.222222	0.296296	0.148148	0.027523	0.229358	0.486239	0.688073	0.981651	0.018349	0.238532	0.412844	0.724771	0.990826	0.009174	0.211009	0.495413	0.788991	1	0.449541	0.311927	0.238532	0.12963	0.055556	0	0.009174	0.238532	0.59633	0.834862	1	0.256881	0.495413	0.614679	0.779817	0.963303	0.055046	0.155963	0.220183	0.394495	0.458716	0.440367	0.388889	0.055046	0.211009	0.495413	0.816514	0.963303	0.256881
0.39823	0.348673	0.253097	0.237589	0.161348	0.159574	0.00531	0.306195	0.646018	0.861947	1	0.00354	0.20708	0.460177	0.715044	0.99115	0.00177	0.235398	0.40708	0.575221	0.943363	0.60354	0.166372	0.230088	0.051418	0.065603	0.005319	0.00177	0.307965	0.688496	0.838938	1	0.00531	0.215929	0.338053	0.578761	0.642478	0.030088	0.230088	0.4	0.486726	0.906195	0.361062	0.283688	0.00708	0.20708	0.366372	0.523894	0.688496	0.380531
0.301552	0.394678	0.303769	0.242222	0.177778	0.233333	0.004435	0.226164	0.518847	0.807095	1	0.006652	0.261641	0.505543	0.740576	0.993348	0.002217	0.24612	0.474501	0.696231	0.980044	0.463415	0.121951	0.414634	0.044444	0.084444	0.004444	0.002217	0.223947	0.487805	0.804878	1	0.011086	0.093126	0.40133	0.844789	0.946785	0.108647	0.332594	0.527716	0.698448	0.984479	0.569845	0.346667	0.013304	0.312639	0.523282	0.711752	0.988914	0.392461
0.376344	0.301075	0.322581	0.206522	0.271739	0.23913	0.032258	0.236559	0.462366	0.688172	0.903226	0.021505	0.247312	0.537634	0.892473	1	0.010753	0.182796	0.44086	0.666667	0.978495	0.494624	0.301075	0.204301	0.097826	0.032609	0.01087	0.010753	0.236559	0.645161	0.795699	1	0.11828	0.290323	0.569892	0.688172	0.88172	0.150538	0.182796	0.376344	0.430108	0.483871	0.365591	0.434783	0.043011	0.172043	0.44086	0.591398	0.978495	0.290323
0.351485	0.361386	0.287129	0.278607	0.243781	0.208955	0.019802	0.222772	0.480198	0.782178	1	0.009901	0.277228	0.559406	0.767327	0.99505	0.00495	0.237624	0.450495	0.678218	0.990099	0.415842	0.39604	0.188119	0.124378	0.064677	0.004975	0.00495	0.282178	0.584158	0.806931	1	0.009901	0.29703	0.445545	0.633663	0.886139	0.079208	0.222772	0.559406	0.782178	0.990099	0.420792	0.457711	0.014851	0.242574	0.445545	0.663366	0.89604	0.361386
0.323232	0.358586	0.318182	0.218274	0.218274	0.233503	0.040404	0.353535	0.585859	0.79798	0.964646	0.010101	0.151515	0.424242	0.686869	1	0.005051	0.232323	0.454545	0.707071	0.979798	0.510101	0.348485	0.141414	0.126904	0.045685	0.005076	0.005051	0.176768	0.429293	0.717172	1	0.237374	0.419192	0.555556	0.757576	0.984848	0.015152	0.045455	0.287879	0.89899	0.959596	0.388889	0.385787	0.020202	0.252525	0.520202	0.691919	0.979798	0.363636
0.419492	0.266949	0.313559	0.242553	0.225532	0.178723	0.008475	0.228814	0.504237	0.745763	0.995763	0.072034	0.245763	0.495763	0.771186	1	0.004237	0.237288	0.466102	0.720339	0.970339	0.34322	0.09322	0.563559	0.025532	0.093617	0	0.004237	0.169492	0.474576	0.758475	1	0.444915	0.779661	0.834746	0.855932	0.881356	0.012712	0.233051	0.411017	0.648305	0.978814	0.512712	0.374468	0.025424	0.233051	0.444915	0.644068	0.970339	0.271186
0.372093	0.318937	0.30897	0.213333	0.25	0.206667	0.006645	0.245847	0.551495	0.813953	1	0.019934	0.242525	0.498339	0.700997	0.990033	0.003322	0.249169	0.458472	0.684385	0.996678	0.458472	0.162791	0.378738	0.046667	0.093333	0	0.003322	0.225914	0.581395	0.833887	1	0.13289	0.282392	0.365449	0.55814	0.644518	0.016611	0.242525	0.468439	0.740864	0.960133	0.495017	0.38	0.0299	0.222591	0.438538	0.624585	0.986711	0.335548
0.330189	0.396226	0.273585	0.2	0.219048	0.219048	0.037736	0.264151	0.433962	0.716981	0.990566	0.018868	0.245283	0.59434	0.858491	0.981132	0.009434	0.179245	0.424528	0.613208	1	0.415094	0.04717	0.537736	0.019048	0.114286	0	0.009434	0.301887	0.716981	0.896226	1	0.613208	0.613208	0.622642	0.632075	0.650943	0.037736	0.179245	0.377358	0.509434	0.830189	0.330189	0.380952	0.04717	0.198113	0.386792	0.603774	0.830189	0.415094
0.366372	0.339823	0.293805	0.239362	0.214539	0.214539	0.00354	0.235398	0.490265	0.752212	0.99823	0.00708	0.233628	0.513274	0.778761	0.984071	0.00177	0.258407	0.474336	0.722124	1	0.559292	0.152212	0.288496	0.069149	0.072695	0.001773	0.00177	0.2	0.488496	0.677876	1	0.042478	0.210619	0.428319	0.555752	0.929204	0.017699	0.325664	0.693805	0.780531	0.99292	0.442478	0.397163	0.00708	0.261947	0.467257	0.713274	0.99115	0.362832
0.359081	0.335073	0.305846	0.238245	0.212121	0.211076	0.003132	0.228601	0.461378	0.713987	1	0.004175	0.245303	0.505219	0.755741	0.998956	0.001044	0.276618	0.524008	0.77453	0.997912	0.460334	0.228601	0.311065	0.08255	0.059561	0.007315	0.001044	0.267223	0.461378	0.740084	1	0.006263	0.308977	0.512526	0.7881	0.968685	0.009395	0.192067	0.605428	0.755741	0.878914	0.530271	0.342738	0.007307	0.262004	0.524008	0.742171	0.982255	0.348643
0.372093	0.302326	0.325581	0.341176	0.211765	0.176471	0.034884	0.244186	0.523256	0.732558	1	0.023256	0.162791	0.395349	0.651163	0.988372	0.011628	0.313953	0.534884	0.755814	0.965116	0.348837	0.244186	0.406977	0.094118	0.047059	0	0.011628	0.244186	0.418605	0.906977	1	0.046512	0.337209	0.44186	0.5	0.604651	0.081395	0.162791	0.686047	0.790698	0.895349	0.430233	0.423529	0.046512	0.290698	0.453488	0.686047	0.965116	0.337209
0.415094	0.301887	0.283019	0.272152	0.21519	0.234177	0.012579	0.245283	0.54717	0.792453	1	0.037736	0.257862	0.446541	0.679245	0.987421	0.006289	0.213836	0.471698	0.691824	0.974843	0.27673	0.314465	0.408805	0.050633	0.063291	0.012658	0.006289	0.150943	0.345912	0.742138	1	0.025157	0.610063	0.691824	0.779874	0.861635	0.075472	0.283019	0.408805	0.540881	0.974843	0.402516	0.43038	0.018868	0.301887	0.496855	0.691824	0.981132	0.295597
0.354118	0.335294	0.310588	0.244994	0.208481	0.207303	0.005882	0.277647	0.550588	0.762353	1	0.007059	0.214118	0.46	0.712941	0.998824	0.001176	0.263529	0.489412	0.754118	0.997647	0.418824	0.150588	0.430588	0.058893	0.08245	0.009423	0.001176	0.211765	0.511765	0.730588	1	0.002353	0.169412	0.365882	0.578824	0.985882	0.021176	0.329412	0.56	0.814118	0.997647	0.503529	0.414605	0.003529	0.229412	0.465882	0.695294	0.997647	0.335294
0.37469	0.26799	0.35732	0.18408	0.261194	0.208955	0.004963	0.253102	0.533499	0.784119	1	0.009926	0.176179	0.387097	0.674938	0.997519	0.002481	0.317618	0.516129	0.761787	0.995037	0.352357	0.094293	0.55335	0.039801	0.109453	0.004975	0.002481	0.203474	0.531017	0.746898	1	0.004963	0.064516	0.148883	0.233251	0.305211	0.019851	0.364764	0.573201	0.791563	0.992556	0.593052	0.393035	0.007444	0.243176	0.466501	0.707196	0.980149	0.255583
0.327273	0.42303	0.249697	0.275485	0.163835	0.206311	0.002424	0.241212	0.470303	0.779394	0.997576	0.006061	0.247273	0.558788	0.76	1	0.001212	0.270303	0.446061	0.681212	0.998788	0.486061	0.13697	0.37697	0.050971	0.080097	0.002427	0.001212	0.139394	0.408485	0.689697	1	0.007273	0.309091	0.473939	0.606061	0.718788	0.110303	0.344242	0.642424	0.835152	0.995152	0.442424	0.288835	0.006061	0.284848	0.493333	0.687273	0.996364	0.458182
0.34058	0.362319	0.297101	0.243194	0.210526	0.219601	0.005435	0.255435	0.536232	0.797101	0.996377	0.003623	0.28442	0.528986	0.778986	1	0.001812	0.184783	0.427536	0.630435	0.992754	0.467391	0.063406	0.469203	0.019964	0.07804	0.005445	0.001812	0.26087	0.641304	0.824275	1	0.056159	0.068841	0.186594	0.373188	0.615942	0.005435	0.29529	0.461957	0.652174	0.994565	0.496377	0.315789	0.007246	0.217391	0.45471	0.625	0.992754	0.418478
0.359813	0.323988	0.316199	0.196568	0.23869	0.234009	0.012461	0.260125	0.503115	0.757009	1	0.003115	0.228972	0.479751	0.719626	0.990654	0.001558	0.249221	0.520249	0.761682	0.996885	0.362928	0.267913	0.369159	0.115445	0.059282	0.00936	0.001558	0.23676	0.450156	0.735202	1	0.004673	0.26947	0.556075	0.752336	0.965732	0.031153	0.23053	0.484424	0.761682	0.985981	0.593458	0.358814	0.003115	0.283489	0.512461	0.744548	0.996885	0.338006
0.328904	0.328904	0.342193	0.203333	0.25	0.216667	0.023256	0.252492	0.451827	0.780731	0.993355	0.009967	0.196013	0.481728	0.727575	0.990033	0.003322	0.259136	0.531561	0.754153	1	0.375415	0.17608	0.448505	0.053333	0.106667	0	0.003322	0.212625	0.461794	0.717608	1	0.149502	0.302326	0.481728	0.677741	0.767442	0.013289	0.252492	0.541528	0.843854	0.996678	0.548173	0.426667	0.006645	0.23588	0.498339	0.684385	0.990033	0.328904
0.340426	0.404255	0.255319	0.3	0.178571	0.157143	0.049645	0.22695	0.510638	0.659574	1	0.014184	0.319149	0.602837	0.843972	0.978723	0.007092	0.184397	0.361702	0.560284	0.964539	0.496454	0.446809	0.056738	0.157143	0.014286	0	0.007092	0.333333	0.602837	0.815603	1	0.014184	0.148936	0.340426	0.539007	0.77305	0.886525	0.893617	0.907801	0.921986	0.93617	0.35461	0.414286	0.014184	0.184397	0.397163	0.638298	0.907801	0.375887
0.373093	0.278779	0.348128	0.197222	0.265278	0.211111	0.004161	0.235784	0.507628	0.732316	1	0.002774	0.242718	0.460472	0.743412	0.998613	0.001387	0.259362	0.503467	0.753121	0.997226	0.436893	0.238558	0.324549	0.0875	0.059722	0.004167	0.001387	0.231623	0.43828	0.705964	1	0.074896	0.208044	0.47018	0.897365	0.997226	0.008322	0.327323	0.615811	0.754508	0.883495	0.532594	0.372222	0.005548	0.280166	0.499307	0.750347	0.997226	0.29681
0.337143	0.491429	0.171429	0.332378	0.174785	0.120344	0.008571	0.225714	0.431429	0.642857	1	0.005714	0.377143	0.682857	0.851429	0.994286	0.002857	0.154286	0.3	0.46	0.625714	0.585714	0.14	0.274286	0.045845	0.051576	0	0.002857	0.445714	0.665714	0.837143	1	0.028571	0.16	0.214286	0.425714	0.577143	0.077143	0.24	0.357143	0.471429	0.991429	0.428571	0.401146	0.014286	0.191429	0.391429	0.557143	0.925714	0.5
0.318043	0.385321	0.296636	0.254601	0.187117	0.251534	0.012232	0.211009	0.474006	0.697248	0.996942	0.006116	0.302752	0.556575	0.779817	1	0.003058	0.235474	0.446483	0.730887	0.984709	0.501529	0.262997	0.235474	0.104294	0.04908	0.01227	0.003058	0.238532	0.544343	0.7737	1	0.006116	0.250765	0.519878	0.666667	0.929664	0.024465	0.103976	0.461774	0.840979	0.981651	0.504587	0.368098	0.009174	0.302752	0.504587	0.727829	0.984709	0.373089
0.281893	0.465021	0.253086	0.226804	0.152577	0.249485	0.00823	0.240741	0.419753	0.769547	0.995885	0.004115	0.271605	0.549383	0.746914	1	0.002058	0.211934	0.471193	0.734568	0.979424	0.633745	0.158436	0.207819	0.061856	0.065979	0	0.002058	0.251029	0.567901	0.736626	1	0.004115	0.179012	0.366255	0.465021	0.979424	0.13786	0.290123	0.487654	0.790123	0.950617	0.580247	0.247423	0.006173	0.403292	0.611111	0.771605	0.979424	0.465021
0.355	0.32	0.325	0.221106	0.251256	0.226131	0.01	0.19	0.425	0.67	0.985	0.015	0.215	0.525	0.78	1	0.005	0.31	0.535	0.75	0.945	0.45	0.445	0.105	0.130653	0.030151	0	0.005	0.29	0.59	0.835	1	0.015	0.315	0.495	0.67	0.92	0.085	0.105	0.235	0.26	0.705	0.445	0.462312	0.02	0.25	0.475	0.71	0.94	0.375
0.354839	0.270968	0.374194	0.168831	0.25974	0.24026	0.025806	0.193548	0.483871	0.793548	0.987097	0.012903	0.206452	0.445161	0.735484	1	0.006452	0.264516	0.516129	0.709677	0.993548	0.296774	0	0.703226	0	0.103896	0	0.006452	0.187097	0.348387	0.729032	1	0	0	0	0	0	0.051613	0.251613	0.516129	0.76129	0.980645	0.522581	0.363636	0.058065	0.270968	0.548387	0.741935	0.974194	0.283871
0.441441	0.252252	0.306306	0.263636	0.290909	0.172727	0.018018	0.288288	0.531532	0.756757	1	0.045045	0.189189	0.378378	0.702703	0.927928	0.009009	0.234234	0.495495	0.72973	0.972973	0.432432	0.297297	0.27027	0.118182	0.063636	0.009091	0.009009	0.27027	0.630631	0.774775	1	0.036036	0.333333	0.603604	0.801802	0.963964	0.081081	0.135135	0.261261	0.45045	0.927928	0.396396	0.418182	0.036036	0.189189	0.45045	0.783784	0.972973	0.288288
0.346667	0.324848	0.328485	0.234223	0.230583	0.200243	0.002424	0.281212	0.547879	0.764848	1	0.008485	0.259394	0.511515	0.818182	0.997576	0.001212	0.214545	0.430303	0.665455	0.950303	0.408485	0.191515	0.4	0.076456	0.071602	0.015777	0.001212	0.237576	0.527273	0.833939	1	0.006061	0.289697	0.541818	0.749091	0.973333	0.014545	0.252121	0.46303	0.699394	0.945455	0.524848	0.424757	0.004848	0.219394	0.442424	0.733333	0.993939	0.315152
0.419355	0.236559	0.344086	0.163043	0.336957	0.152174	0.021505	0.204301	0.44086	0.677419	0.989247	0.107527	0.247312	0.569892	0.752688	1	0.010753	0.258065	0.462366	0.817204	0.967742	0.451613	0.333333	0.215054	0.173913	0.043478	0	0.010753	0.301075	0.677419	0.870968	1	0.032258	0.247312	0.537634	0.709677	0.924731	0.11828	0.16129	0.354839	0.408602	0.462366	0.387097	0.413043	0.032258	0.236559	0.462366	0.784946	0.956989	0.236559
0.568465	0.248963	0.182573	0.291667	0.1875	0.075	0.012448	0.377593	0.589212	0.788382	1	0.008299	0.190871	0.452282	0.755187	0.995851	0.004149	0.107884	0.273859	0.390041	0.929461	0.572614	0.124481	0.302905	0.05	0.1	0.008333	0.004149	0.410788	0.659751	0.813278	1	0.016598	0.041494	0.186722	0.236515	0.817427	0.053942	0.26556	0.348548	0.485477	0.962656	0.219917	0.208333	0.016598	0.112033	0.244813	0.3361	0.825726	0.240664
0.372671	0.304348	0.322981	0.225	0.19375	0.25	0.018634	0.192547	0.42236	0.726708	1	0.012422	0.223602	0.496894	0.751553	0.987578	0.006211	0.279503	0.540373	0.745342	0.956522	0.428571	0.15528	0.416149	0.0625	0.0625	0	0.006211	0.130435	0.341615	0.677019	1	0.248447	0.279503	0.453416	0.490683	0.757764	0.024845	0.509317	0.614907	0.832298	0.937888	0.403727	0.425	0.031056	0.291925	0.540373	0.745342	0.956522	0.329193
0.440217	0.375	0.184783	0.305177	0.158038	0.119891	0.01087	0.195652	0.527174	0.758152	0.994565	0.005435	0.252717	0.429348	0.638587	0.991848	0.002717	0.413043	0.589674	0.766304	1	0.48913	0.070652	0.440217	0.038147	0.087193	0	0.002717	0.163043	0.334239	0.61413	1	0.105978	0.402174	0.486413	0.565217	0.951087	0.016304	0.38587	0.660326	0.782609	0.997283	0.258152	0.294278	0.024457	0.415761	0.565217	0.722826	0.98913	0.4375
0.394737	0.398496	0.206767	0.29434	0.166038	0.139623	0.022556	0.236842	0.541353	0.759398	0.988722	0.007519	0.191729	0.443609	0.729323	1	0.003759	0.274436	0.522556	0.669173	0.996241	0.511278	0.048872	0.43985	0.022642	0.083019	0	0.003759	0.146617	0.443609	0.845865	1	0.25188	0.259398	0.353383	0.364662	0.488722	0.033835	0.319549	0.605263	0.733083	0.992481	0.308271	0.316981	0.045113	0.334586	0.578947	0.706767	0.996241	0.394737
0.413885	0.365821	0.220294	0.264706	0.17246	0.171123	0.00534	0.242991	0.516689	0.82243	1	0.00267	0.311081	0.512684	0.715621	0.993324	0.001335	0.214953	0.449933	0.676903	0.94259	0.594126	0.06008	0.345794	0.028075	0.076203	0.004011	0.001335	0.252336	0.495327	0.735648	1	0.024032	0.165554	0.316422	0.58745	0.715621	0.021362	0.284379	0.519359	0.817089	0.995995	0.356475	0.342246	0.004005	0.194927	0.427236	0.604806	0.94259	0.383178
0.321513	0.420804	0.257683	0.263033	0.14455	0.222749	0.004728	0.385343	0.531915	0.756501	0.973995	0.007092	0.156028	0.371158	0.725768	1	0.002364	0.3026	0.536643	0.768322	0.997636	0.631206	0.101655	0.267139	0.106635	0.07346	0.00237	0.002364	0.200946	0.510638	0.747045	1	0.104019	0.189125	0.375887	0.607565	0.992908	0.047281	0.345154	0.503546	0.758865	0.983452	0.3026	0.50237	0.018913	0.27896	0.524823	0.754137	0.985816	0.439716
0.356164	0.356164	0.287671	0.236111	0.277778	0.125	0.013699	0.136986	0.410959	0.630137	0.972603	0.205479	0.369863	0.671233	0.808219	0.958904	0.041096	0.164384	0.383562	0.60274	1	0.39726	0.30137	0.30137	0.152778	0.069444	0.013889	0.013699	0.219178	0.438356	0.589041	1	0.041096	0.39726	0.671233	0.739726	0.986301	0.082192	0.136986	0.328767	0.821918	0.90411	0.369863	0.472222	0.054795	0.246575	0.493151	0.684932	0.958904	0.342466
0.397177	0.358871	0.243952	0.266667	0.185859	0.181818	0.006048	0.185484	0.417339	0.72379	0.997984	0.004032	0.252016	0.495968	0.756048	0.991935	0.002016	0.403226	0.574597	0.774194	1	0.612903	0.165323	0.221774	0.068687	0.068687	0	0.002016	0.191532	0.366935	0.635081	1	0.235887	0.471774	0.671371	0.877016	0.977823	0.020161	0.316532	0.627016	0.784274	0.987903	0.342742	0.290909	0.020161	0.40121	0.594758	0.802419	0.989919	0.417339
0.432161	0.316583	0.251256	0.257576	0.212121	0.19697	0.01005	0.261307	0.542714	0.809045	1	0.055276	0.246231	0.462312	0.723618	0.98995	0.005025	0.18593	0.447236	0.633166	0.964824	0.386935	0.236181	0.376884	0.10101	0.070707	0.010101	0.005025	0.170854	0.557789	0.834171	1	0.01005	0.180905	0.457286	0.658291	0.733668	0.045226	0.266332	0.361809	0.773869	0.959799	0.351759	0.414141	0.015075	0.19598	0.467337	0.658291	0.964824	0.321608
0.305668	0.502024	0.192308	0.273834	0.133874	0.188641	0.006073	0.261134	0.530364	0.730769	1	0.004049	0.248988	0.481781	0.740891	0.993927	0.002024	0.226721	0.51417	0.765182	0.997976	0.732794	0.058704	0.208502	0.032454	0.064909	0.008114	0.002024	0.202429	0.502024	0.757085	1	0.115385	0.483806	0.665992	0.807692	0.995951	0.109312	0.259109	0.319838	0.591093	0.965587	0.508097	0.267748	0.016194	0.291498	0.508097	0.805668	0.997976	0.45749
0.392694	0.307458	0.299848	0.243902	0.22561	0.193598	0.018265	0.304414	0.5586	0.785388	0.998478	0.003044	0.200913	0.462709	0.724505	1	0.001522	0.21309	0.459665	0.704718	0.987823	0.445967	0.028919	0.525114	0.01372	0.105183	0.001524	0.001522	0.296804	0.519026	0.774734	1	0.266362	0.270928	0.283105	0.452055	0.916286	0.016743	0.208524	0.494673	0.741248	0.987823	0.4414	0.39939	0.012177	0.222222	0.462709	0.710807	0.987823	0.340944
0.358242	0.432967	0.208791	0.248899	0.167401	0.143172	0.006593	0.224176	0.437363	0.672527	1	0.004396	0.27033	0.586813	0.815385	0.997802	0.002198	0.276923	0.483516	0.643956	0.995604	0.657143	0.063736	0.279121	0.030837	0.044053	0.004405	0.002198	0.210989	0.586813	0.784615	1	0.068132	0.32967	0.364835	0.417582	0.643956	0.101099	0.259341	0.501099	0.718681	0.947253	0.4	0.352423	0.017582	0.274725	0.483516	0.694505	0.971429	0.452747
0.304054	0.459459	0.236486	0.340136	0.142857	0.204082	0.013514	0.202703	0.445946	0.682432	1	0.02027	0.27027	0.581081	0.831081	0.993243	0.006757	0.243243	0.459459	0.614865	0.932432	0.533784	0.121622	0.344595	0.034014	0.061224	0.006803	0.006757	0.202703	0.628378	0.864865	1	0.243243	0.263514	0.344595	0.371622	0.621622	0.087838	0.378378	0.47973	0.689189	0.777027	0.405405	0.312925	0.047297	0.324324	0.459459	0.614865	0.898649	0.493243
0.352181	0.318255	0.329564	0.223301	0.221683	0.197411	0.008078	0.232633	0.516963	0.77706	1	0.006462	0.197092	0.439418	0.736672	0.996769	0.001616	0.311793	0.53958	0.731826	0.983845	0.49273	0.163166	0.344103	0.063107	0.079288	0.004854	0.001616	0.159935	0.336026	0.647819	1	0.009693	0.308562	0.568659	0.728595	0.886914	0.077544	0.415186	0.599354	0.817447	0.995153	0.508885	0.355987	0.009693	0.345719	0.523425	0.731826	0.988691	0.360258
0.357013	0.417122	0.225865	0.279197	0.156934	0.184307	0.007286	0.313297	0.546448	0.757741	1	0.005464	0.205829	0.477231	0.695811	0.992714	0.001821	0.233151	0.45173	0.797814	0.998179	0.71949	0.061931	0.218579	0.043796	0.069343	0.007299	0.001821	0.198543	0.48816	0.708561	1	0.116576	0.227687	0.318761	0.68306	0.994536	0.005464	0.418944	0.557377	0.899818	0.969035	0.433515	0.39781	0.010929	0.213115	0.473588	0.766849	0.994536	0.420765
0.376825	0.415146	0.208029	0.308676	0.174429	0.155251	0.00365	0.247263	0.512774	0.741788	1	0.001825	0.20073	0.471715	0.738139	0.999088	0.000912	0.355839	0.541971	0.788321	0.998175	0.740876	0.059307	0.199818	0.03653	0.051142	0.003653	0.000912	0.215328	0.458942	0.698905	1	0.02281	0.399635	0.455292	0.643248	0.946168	0.010949	0.414234	0.809307	0.868613	0.933394	0.362226	0.336073	0.004562	0.32573	0.559307	0.788321	0.998175	0.423358
0.584416	0.255411	0.160173	0.247826	0.165217	0.073913	0.008658	0.290043	0.52381	0.722944	1	0.017316	0.220779	0.688312	0.844156	0.987013	0.004329	0.181818	0.294372	0.372294	0.978355	0.480519	0.004329	0.515152	0.008696	0.078261	0	0.004329	0.116883	0.359307	0.865801	1	0.229437	0.229437	0.229437	0.229437	0.229437	0.17316	0.385281	0.519481	0.658009	0.878788	0.147186	0.156522	0.034632	0.181818	0.268398	0.333333	0.532468	0.272727
0.323432	0.313531	0.363036	0.198675	0.264901	0.235099	0.009901	0.287129	0.570957	0.805281	0.993399	0.006601	0.240924	0.485149	0.752475	1	0.0033	0.191419	0.452145	0.653465	0.976898	0.478548	0.356436	0.165017	0.112583	0.05298	0.006623	0.0033	0.346535	0.646865	0.854785	1	0.013201	0.20462	0.379538	0.554455	0.980198	0.115512	0.155116	0.514851	0.729373	0.778878	0.50165	0.377483	0.013201	0.247525	0.448845	0.627063	0.983498	0.369637
0.347032	0.360731	0.292237	0.256293	0.221968	0.183066	0.006849	0.271689	0.547945	0.773973	1	0.004566	0.212329	0.488584	0.730594	0.986301	0.002283	0.244292	0.479452	0.762557	0.995434	0.360731	0.136986	0.502283	0.077803	0.10984	0.004577	0.002283	0.212329	0.518265	0.785388	1	0.06621	0.299087	0.52968	0.920091	0.995434	0.020548	0.269406	0.481735	0.710046	0.947489	0.579909	0.389016	0.011416	0.244292	0.472603	0.700913	0.995434	0.401826
0.341297	0.320819	0.337884	0.219178	0.236301	0.212329	0.010239	0.180887	0.47099	0.709898	1	0.047782	0.327645	0.525597	0.740614	0.982935	0.003413	0.211604	0.484642	0.788396	0.993174	0.34471	0.12628	0.52901	0.047945	0.082192	0.006849	0.003413	0.290102	0.505119	0.795222	1	0.296928	0.406143	0.706485	0.808874	0.938567	0.006826	0.167235	0.443686	0.665529	0.976109	0.556314	0.40411	0.006826	0.307167	0.522184	0.754266	0.982935	0.337884
0.348315	0.286517	0.365169	0.19774	0.271186	0.231638	0.016854	0.230337	0.466292	0.713483	1	0.022472	0.179775	0.47191	0.724719	0.994382	0.005618	0.275281	0.52809	0.769663	0.977528	0.432584	0.41573	0.151685	0.141243	0.050847	0.00565	0.005618	0.196629	0.52809	0.808989	1	0.016854	0.331461	0.494382	0.696629	0.983146	0.073034	0.101124	0.258427	0.623596	0.865169	0.460674	0.508475	0.011236	0.258427	0.483146	0.730337	0.983146	0.325843
0.333805	0.500707	0.165488	0.229462	0.135977	0.127479	0.004243	0.404526	0.643564	0.78925	0.998586	0.002829	0.190948	0.335219	0.635078	0.997171	0.001414	0.442716	0.571429	0.762376	1	0.677511	0.080622	0.241867	0.033994	0.028329	0	0.001414	0.171146	0.340877	0.644979	1	0.155587	0.463932	0.526167	0.585573	0.909477	0.359264	0.608204	0.725601	0.786421	0.862801	0.428571	0.271955	0.007072	0.356436	0.579915	0.865629	0.98727	0.489392
0.369863	0.332192	0.297945	0.250859	0.209622	0.216495	0.010274	0.222603	0.520548	0.760274	0.993151	0.006849	0.318493	0.486301	0.719178	0.996575	0.003425	0.215753	0.476027	0.732877	1	0.30137	0.089041	0.609589	0.030928	0.079038	0.003436	0.003425	0.178082	0.506849	0.770548	1	0.010274	0.027397	0.078767	0.106164	0.174658	0.143836	0.349315	0.547945	0.75	0.962329	0.506849	0.357388	0.013699	0.267123	0.493151	0.722603	0.952055	0.291096
0.327125	0.37369	0.299185	0.216783	0.216783	0.201632	0.003492	0.288708	0.537835	0.76135	0.995343	0.006985	0.19092	0.521537	0.777648	1	0.001164	0.285215	0.461001	0.648428	0.998836	0.59837	0.017462	0.384168	0.01049	0.064103	0.001166	0.001164	0.152503	0.580908	0.83702	1	0.250291	0.252619	0.431898	0.778813	0.9383	0.096624	0.351572	0.488941	0.610012	0.859139	0.57858	0.428904	0.002328	0.195576	0.434226	0.67404	0.998836	0.370198
0.391304	0.271739	0.336957	0.191257	0.300546	0.174863	0.016304	0.206522	0.375	0.744565	0.994565	0.043478	0.358696	0.554348	0.733696	1	0.005435	0.184783	0.532609	0.73913	0.98913	0.347826	0.086957	0.565217	0.054645	0.087432	0	0.005435	0.211957	0.505435	0.836957	1	0.119565	0.75	0.798913	0.820652	0.869565	0.01087	0.244565	0.418478	0.625	0.945652	0.445652	0.502732	0.027174	0.266304	0.516304	0.690217	0.978261	0.304348
0.375635	0.340102	0.284264	0.259542	0.201018	0.198473	0.010152	0.258883	0.535533	0.769036	1	0.005076	0.261421	0.5	0.753807	0.997462	0.002538	0.218274	0.431472	0.71066	0.982234	0.469543	0.192893	0.337563	0.076336	0.061069	0	0.002538	0.243655	0.520305	0.769036	1	0.19797	0.286802	0.510152	0.624365	0.845178	0.01269	0.126904	0.423858	0.741117	0.98731	0.505076	0.340967	0.025381	0.263959	0.461929	0.692893	0.959391	0.36802
0.303644	0.4278	0.268556	0.262162	0.167568	0.228378	0.002699	0.218623	0.495277	0.723347	0.993252	0.013495	0.246964	0.483131	0.734143	1	0.00135	0.299595	0.516869	0.77193	0.997301	0.618084	0.132254	0.249663	0.052703	0.05	0.001351	0.00135	0.224022	0.461538	0.695007	1	0.126856	0.357625	0.573549	0.746289	0.881242	0.008097	0.379217	0.541161	0.898785	0.991903	0.475034	0.337838	0.012146	0.358974	0.593792	0.77193	0.997301	0.437247
0.339726	0.386301	0.273973	0.228022	0.211538	0.236264	0.005479	0.20274	0.520548	0.769863	0.994521	0.013699	0.254795	0.457534	0.70137	1	0.00274	0.265753	0.528767	0.747945	0.969863	0.69589	0.057534	0.246575	0.098901	0.098901	0.005495	0.00274	0.230137	0.468493	0.720548	1	0.019178	0.257534	0.40274	0.526027	0.857534	0.084932	0.339726	0.646575	0.8	0.994521	0.30137	0.505495	0.013699	0.271233	0.512329	0.734247	0.989041	0.383562
0.401961	0.284314	0.313725	0.267327	0.306931	0.138614	0.039216	0.333333	0.54902	0.715686	0.980392	0.019608	0.186275	0.401961	0.794118	1	0.009804	0.205882	0.431373	0.656863	0.931373	0.411765	0.303922	0.284314	0.079208	0.039604	0	0.009804	0.127451	0.588235	0.794118	1	0.078431	0.362745	0.656863	0.852941	0.931373	0.156863	0.215686	0.284314	0.480392	0.558824	0.529412	0.29703	0.029412	0.205882	0.401961	0.568627	0.931373	0.323529
0.393004	0.320988	0.286008	0.28866	0.245361	0.197938	0.006173	0.253086	0.475309	0.699588	1	0.004115	0.238683	0.54321	0.792181	0.997942	0.002058	0.234568	0.49177	0.744856	0.99177	0.444444	0.104938	0.450617	0.047423	0.092784	0.006186	0.002058	0.263374	0.555556	0.812757	1	0.26749	0.308642	0.442387	0.847737	0.934156	0.006173	0.203704	0.473251	0.621399	0.993827	0.442387	0.395876	0.010288	0.234568	0.512346	0.82716	0.99177	0.316872
0.393939	0.338384	0.267677	0.263959	0.203046	0.187817	0.010101	0.227273	0.520202	0.80303	0.994949	0.030303	0.237374	0.464646	0.727273	1	0.005051	0.252525	0.479798	0.636364	0.989899	0.5	0.141414	0.358586	0.071066	0.071066	0	0.005051	0.358586	0.540404	0.707071	1	0.333333	0.388889	0.530303	0.621212	0.742424	0.015152	0.09596	0.227273	0.858586	0.984848	0.373737	0.365482	0.030303	0.20202	0.373737	0.616162	0.984848	0.338384
0.298544	0.390777	0.31068	0.231144	0.182482	0.226277	0.007282	0.18932	0.436893	0.723301	0.997573	0.004854	0.264563	0.495146	0.75	0.985437	0.002427	0.259709	0.51699	0.757282	1	0.402913	0.206311	0.390777	0.077859	0.068127	0	0.002427	0.194175	0.487864	0.779126	1	0.065534	0.230583	0.427184	0.558252	0.995146	0.101942	0.286408	0.601942	0.769417	0.98301	0.582524	0.413625	0.012136	0.31068	0.526699	0.752427	0.995146	0.415049
0.352632	0.384211	0.263158	0.306878	0.206349	0.169312	0.010526	0.247368	0.484211	0.747368	1	0.015789	0.263158	0.584211	0.826316	0.989474	0.005263	0.215789	0.389474	0.626316	0.978947	0.621053	0.157895	0.221053	0.068783	0.068783	0.005291	0.005263	0.184211	0.6	0.784211	1	0.136842	0.278947	0.384211	0.521053	0.973684	0.078947	0.236842	0.457895	0.747368	0.978947	0.347368	0.391534	0.131579	0.3	0.526316	0.805263	0.978947	0.363158
0.385332	0.351572	0.263097	0.278555	0.184149	0.17366	0.002328	0.207218	0.500582	0.771828	1	0.006985	0.252619	0.450524	0.738068	0.998836	0.001164	0.268917	0.545984	0.736903	0.969732	0.463329	0.123399	0.413271	0.04662	0.09324	0.006993	0.001164	0.19674	0.398137	0.740396	1	0.020955	0.273574	0.533178	0.662398	0.804424	0.058207	0.296857	0.555297	0.813737	0.976717	0.43539	0.324009	0.020955	0.351572	0.525029	0.715949	0.969732	0.380675
0.317627	0.373473	0.308901	0.237762	0.197552	0.237762	0.00349	0.25829	0.511344	0.776614	1	0.006981	0.239092	0.486911	0.712042	0.989529	0.001745	0.240838	0.506108	0.759162	0.998255	0.488656	0.17801	0.333333	0.066434	0.073427	0.01049	0.001745	0.172775	0.418848	0.677138	1	0.005236	0.376963	0.631763	0.762653	0.933682	0.017452	0.315881	0.516579	0.78534	0.99651	0.535777	0.332168	0.005236	0.286213	0.47993	0.762653	0.986038	0.385689
0.386935	0.407035	0.20603	0.343434	0.156566	0.141414	0.020101	0.241206	0.572864	0.834171	1	0.01005	0.231156	0.497487	0.748744	0.979899	0.005025	0.251256	0.38191	0.60804	0.969849	0.633166	0.135678	0.231156	0.050505	0.060606	0	0.005025	0.190955	0.472362	0.763819	1	0.281407	0.41206	0.447236	0.603015	0.668342	0.025126	0.356784	0.552764	0.924623	0.984925	0.291457	0.323232	0.025126	0.331658	0.497487	0.648241	0.984925	0.437186
0.360775	0.271186	0.368039	0.196602	0.240291	0.201456	0.012107	0.249395	0.532688	0.774818	0.987893	0.004843	0.239709	0.472155	0.699758	0.990315	0.002421	0.251816	0.486683	0.753027	1	0.358354	0.138015	0.503632	0.082524	0.106796	0.004854	0.002421	0.208232	0.539952	0.813559	1	0.038741	0.16707	0.513317	0.917676	0.997579	0.007264	0.25908	0.464891	0.702179	0.951574	0.583535	0.373786	0.007264	0.242131	0.457627	0.677966	0.995157	0.268765
0.331839	0.452915	0.215247	0.333333	0.13964	0.171171	0.026906	0.29148	0.475336	0.695067	1	0.013453	0.255605	0.560538	0.744395	0.995516	0.004484	0.174888	0.331839	0.7713	0.991031	0.479821	0.278027	0.242152	0.09009	0.081081	0.009009	0.004484	0.304933	0.524664	0.690583	1	0.008969	0.09417	0.206278	0.331839	0.820628	0.484305	0.672646	0.798206	0.892377	0.991031	0.367713	0.423423	0.008969	0.219731	0.430493	0.807175	0.991031	0.488789
0.36	0.36	0.28	0.28125	0.209821	0.196429	0.008889	0.248889	0.457778	0.751111	0.995556	0.044444	0.32	0.551111	0.742222	1	0.004444	0.173333	0.417778	0.72	0.951111	0.4	0.217778	0.382222	0.066964	0.058036	0.004464	0.004444	0.333333	0.671111	0.888889	1	0.137778	0.204444	0.373333	0.773333	0.866667	0.017778	0.106667	0.426667	0.524444	0.973333	0.462222	0.428571	0.026667	0.24	0.493333	0.68	0.862222	0.36
0.336207	0.327586	0.336207	0.234783	0.234783	0.2	0.017241	0.206897	0.474138	0.681034	0.965517	0.051724	0.275862	0.517241	0.741379	0.982759	0.008621	0.232759	0.465517	0.758621	1	0.224138	0.422414	0.353448	0.052174	0.052174	0.017391	0.008621	0.051724	0.284483	0.577586	1	0.068966	0.655172	0.758621	0.87931	0.991379	0.172414	0.25	0.37069	0.5	0.637931	0.482759	0.486957	0.077586	0.25	0.482759	0.706897	0.982759	0.327586
0.31411	0.364417	0.321472	0.210074	0.246929	0.230958	0.002454	0.280982	0.531288	0.757055	0.998773	0.004908	0.235583	0.480982	0.746012	1	0.001227	0.238037	0.493252	0.748466	0.997546	0.46135	0.245399	0.293252	0.095823	0.061425	0.004914	0.001227	0.207362	0.457669	0.728834	1	0.039264	0.257669	0.422086	0.809816	0.997546	0.006135	0.320245	0.573006	0.732515	0.991411	0.561963	0.415233	0.003681	0.257669	0.469939	0.739877	0.997546	0.402454
0.385827	0.333071	0.281102	0.257683	0.22695	0.193065	0.007087	0.251181	0.491339	0.740157	1	0.001575	0.233071	0.514961	0.751969	0.998425	0.000787	0.258268	0.500787	0.751181	0.99685	0.414173	0.192126	0.393701	0.081166	0.08747	0.00394	0.000787	0.229921	0.520472	0.774803	1	0.00315	0.211024	0.43622	0.689764	0.969291	0.007087	0.284252	0.508661	0.755906	0.985039	0.414961	0.49015	0.00315	0.252756	0.50315	0.759843	0.99685	0.351969
0.299363	0.464968	0.235669	0.288462	0.185897	0.217949	0.012739	0.133758	0.382166	0.636943	0.961783	0.050955	0.273885	0.528662	0.808917	1	0.006369	0.363057	0.55414	0.719745	0.942675	0.630573	0.165605	0.203822	0.051282	0.064103	0.012821	0.006369	0.165605	0.324841	0.579618	1	0.11465	0.503185	0.757962	0.796178	0.942675	0.019108	0.535032	0.636943	0.859873	0.980892	0.394904	0.397436	0.019108	0.261146	0.484076	0.713376	0.942675	0.471338
0.264484	0.551637	0.183879	0.270202	0.113636	0.176768	0.005038	0.234257	0.382872	0.584383	0.989924	0.025189	0.221662	0.596977	0.790932	1	0.002519	0.345088	0.493703	0.702771	0.992443	0.715365	0.105793	0.178841	0.050505	0.060606	0.005051	0.002519	0.186398	0.493703	0.690176	1	0.219144	0.360202	0.405542	0.700252	0.851385	0.050378	0.425693	0.7733	0.828715	0.974811	0.624685	0.277778	0.007557	0.410579	0.652393	0.813602	0.992443	0.506297
0.39375	0.35	0.25625	0.201258	0.213836	0.150943	0.04375	0.26875	0.53125	0.73125	0.9875	0.0125	0.2	0.45	0.76875	0.94375	0.00625	0.2375	0.3875	0.66875	1	0.5625	0.13125	0.30625	0.08805	0.100629	0.012579	0.00625	0.2125	0.45	0.725	1	0.1	0.25625	0.50625	0.89375	0.95	0.025	0.30625	0.6375	0.7875	0.99375	0.375	0.415094	0.01875	0.25	0.475	0.66875	0.98125	0.35625
0.419355	0.314516	0.266129	0.260163	0.186992	0.178862	0.016129	0.290323	0.540323	0.766129	1	0.040323	0.225806	0.435484	0.798387	0.991935	0.008065	0.193548	0.403226	0.629032	0.870968	0.483871	0.153226	0.362903	0.04878	0.065041	0	0.008065	0.241935	0.58871	0.879032	1	0.169355	0.193548	0.298387	0.33871	0.645161	0.040323	0.395161	0.483871	0.741935	0.83871	0.435484	0.276423	0.056452	0.298387	0.435484	0.620968	0.83871	0.387097
0.41573	0.2397	0.344569	0.184211	0.255639	0.199248	0.007491	0.247191	0.516854	0.794007	1	0.018727	0.235955	0.531835	0.696629	0.996255	0.003745	0.243446	0.464419	0.715356	0.981273	0.374532	0.183521	0.441948	0.06015	0.097744	0	0.003745	0.157303	0.426966	0.692884	1	0.048689	0.292135	0.404494	0.621723	0.719101	0.018727	0.265918	0.520599	0.82397	0.992509	0.546816	0.398496	0.011236	0.228464	0.464419	0.674157	0.996255	0.265918
0.345196	0.405694	0.24911	0.282143	0.167857	0.207143	0.017794	0.263345	0.508897	0.864769	0.996441	0.010676	0.298932	0.572954	0.743772	1	0.003559	0.185053	0.409253	0.569395	0.967972	0.683274	0.120996	0.19573	0.064286	0.071429	0	0.003559	0.362989	0.565836	0.765125	1	0.039146	0.135231	0.19573	0.298932	0.822064	0.081851	0.227758	0.341637	0.857651	0.975089	0.430605	0.342857	0.035587	0.202847	0.476868	0.604982	0.967972	0.380783
0.395904	0.331058	0.273038	0.270548	0.226027	0.167808	0.010239	0.228669	0.484642	0.764505	1	0.006826	0.204778	0.457338	0.59727	0.989761	0.003413	0.327645	0.641638	0.819113	0.996587	0.546075	0.201365	0.25256	0.085616	0.065068	0.003425	0.003413	0.255973	0.498294	0.641638	1	0.068259	0.191126	0.242321	0.720137	0.955631	0.013652	0.416382	0.682594	0.849829	0.993174	0.409556	0.349315	0.017065	0.423208	0.607509	0.8157	0.996587	0.34471
0.379001	0.370038	0.25096	0.289744	0.166667	0.203846	0.002561	0.211268	0.482714	0.742638	0.99872	0.005122	0.265045	0.536492	0.769526	1	0.00128	0.254802	0.462228	0.724712	0.997439	0.582586	0.15749	0.259923	0.062821	0.057692	0.003846	0.00128	0.294494	0.556978	0.848912	1	0.014085	0.284251	0.454545	0.641485	0.81306	0.058899	0.183099	0.362356	0.650448	0.988476	0.475032	0.379487	0.003841	0.290653	0.53009	0.800256	0.997439	0.357234
0.411215	0.299065	0.28972	0.320755	0.283019	0.150943	0.046729	0.280374	0.514019	0.738318	0.981308	0.018692	0.233645	0.429907	0.728972	0.953271	0.009346	0.205607	0.504673	0.757009	1	0.504673	0.252336	0.242991	0.113208	0.056604	0	0.009346	0.121495	0.439252	0.794393	1	0.373832	0.420561	0.663551	0.859813	0.971963	0.168224	0.271028	0.336449	0.514019	0.579439	0.364486	0.415094	0.037383	0.242991	0.420561	0.654206	0.971963	0.280374
0.391837	0.338776	0.269388	0.22541	0.20082	0.147541	0.008163	0.142857	0.432653	0.722449	0.991837	0.028571	0.244898	0.428571	0.759184	1	0.004082	0.412245	0.620408	0.746939	0.995918	0.563265	0.216327	0.220408	0.057377	0.04918	0.008197	0.004082	0.15102	0.318367	0.718367	1	0.244898	0.359184	0.559184	0.738776	0.959184	0.020408	0.395918	0.608163	0.783673	0.902041	0.432653	0.319672	0.020408	0.37551	0.555102	0.706122	0.987755	0.363265
0.32	0.429565	0.250435	0.252613	0.155052	0.236934	0.005217	0.170435	0.415652	0.695652	0.984348	0.003478	0.332174	0.582609	0.786087	1	0.001739	0.198261	0.429565	0.726957	0.998261	0.732174	0.109565	0.158261	0.041812	0.04878	0.003484	0.001739	0.349565	0.58087	0.8	1	0.062609	0.18087	0.246957	0.328696	0.956522	0.073043	0.163478	0.34087	0.426087	0.733913	0.438261	0.327526	0.024348	0.276522	0.549565	0.812174	0.991304	0.445217
0.309577	0.447661	0.242762	0.261161	0.189732	0.178571	0.013363	0.200445	0.427617	0.697105	0.995546	0.008909	0.33853	0.565702	0.815145	1	0.002227	0.18931	0.365256	0.694878	0.997773	0.632517	0.160356	0.207127	0.060268	0.060268	0.002232	0.002227	0.298441	0.550111	0.790646	1	0.024499	0.135857	0.342984	0.708241	0.975501	0.053452	0.211581	0.423163	0.757238	0.993318	0.510022	0.334821	0.004454	0.267261	0.550111	0.806236	0.988864	0.432071
0.301325	0.403974	0.294702	0.212625	0.186047	0.245847	0.009934	0.31457	0.533113	0.761589	0.993377	0.013245	0.195364	0.463576	0.741722	0.996689	0.003311	0.18543	0.450331	0.718543	1	0.576159	0.274834	0.149007	0.086379	0.039867	0.006645	0.003311	0.274834	0.576159	0.781457	1	0.15894	0.364238	0.556291	0.854305	0.970199	0.013245	0.046358	0.082781	0.221854	0.629139	0.596026	0.285714	0.023179	0.195364	0.450331	0.758278	0.976821	0.400662
0.318264	0.385172	0.296564	0.228261	0.199275	0.226449	0.01085	0.244123	0.468354	0.76311	0.994575	0.003617	0.253165	0.520796	0.759494	1	0.001808	0.240506	0.481013	0.712477	0.998192	0.481013	0.063291	0.455696	0.019928	0.077899	0.005435	0.001808	0.249548	0.636528	0.831826	1	0.056058	0.068716	0.206148	0.381555	0.942134	0.005425	0.305606	0.468354	0.650995	0.985533	0.533454	0.358696	0.007233	0.233273	0.471971	0.654611	0.990958	0.396022
0.592357	0.269639	0.138004	0.261702	0.123404	0.095745	0.006369	0.350318	0.58811	0.781316	1	0.004246	0.195329	0.358811	0.677282	0.995754	0.002123	0.142251	0.284501	0.666667	0.997877	0.783439	0.063694	0.152866	0.025532	0.038298	0	0.002123	0.390658	0.592357	0.796178	1	0.220807	0.278132	0.316348	0.36518	0.974522	0.014862	0.133758	0.171975	0.333333	0.855626	0.195329	0.187234	0.010616	0.127389	0.286624	0.403397	0.993631	0.346072
0.362805	0.365854	0.271341	0.264122	0.169466	0.20916	0.01372	0.248476	0.477134	0.762195	0.995427	0.003049	0.219512	0.48628	0.722561	0.996951	0.001524	0.27439	0.544207	0.759146	1	0.490854	0.135671	0.373476	0.047328	0.083969	0.010687	0.001524	0.1875	0.387195	0.722561	1	0.030488	0.503049	0.660061	0.86128	0.964939	0.006098	0.291159	0.52439	0.728659	0.993902	0.493902	0.345038	0.006098	0.324695	0.542683	0.759146	0.993902	0.381098
0.336683	0.336683	0.326633	0.227273	0.207071	0.207071	0.025126	0.226131	0.487437	0.738693	0.98995	0.01005	0.211055	0.437186	0.703518	0.984925	0.005025	0.266332	0.527638	0.788945	1	0.301508	0.276382	0.422111	0.035354	0.075758	0.015152	0.005025	0.115578	0.351759	0.81407	1	0.055276	0.180905	0.537688	0.61809	0.688442	0.150754	0.326633	0.482412	0.849246	0.984925	0.517588	0.393939	0.020101	0.261307	0.507538	0.79397	0.984925	0.311558
0.340479	0.30517	0.354351	0.195707	0.233586	0.214646	0.003783	0.240858	0.514502	0.774275	0.998739	0.002522	0.250946	0.471627	0.709962	1	0.001261	0.258512	0.509458	0.759142	0.997478	0.319042	0.025221	0.655738	0.011364	0.082071	0.003788	0.001261	0.238335	0.390921	0.663304	1	0.363178	0.368222	0.542245	0.762926	0.789407	0.032787	0.244641	0.527112	0.781841	0.997478	0.544767	0.376263	0.025221	0.262295	0.481715	0.741488	0.994956	0.319042
0.424125	0.202335	0.373541	0.175781	0.304688	0.152344	0.015564	0.249027	0.529183	0.758755	1	0.007782	0.159533	0.44358	0.642023	0.941634	0.003891	0.264591	0.501946	0.77821	0.980545	0.463035	0.307393	0.229572	0.125	0.054688	0	0.003891	0.284047	0.509728	0.747082	1	0.11284	0.229572	0.451362	0.715953	0.902724	0.007782	0.077821	0.494163	0.77821	0.953307	0.486381	0.40625	0.019455	0.303502	0.486381	0.743191	0.961089	0.217899
0.424528	0.358491	0.216981	0.285714	0.171429	0.161905	0.028302	0.198113	0.396226	0.613208	0.877358	0.018868	0.301887	0.622642	0.773585	1	0.009434	0.226415	0.518868	0.801887	0.981132	0.273585	0	0.726415	0	0.057143	0	0.009434	0.066038	0.669811	0.924528	1	0	0	0	0	0	0.084906	0.254717	0.462264	0.641509	0.896226	0.292453	0.361905	0.226415	0.386792	0.59434	0.801887	0.962264	0.349057
0.273196	0.453608	0.273196	0.21447	0.178295	0.245478	0.023196	0.201031	0.487113	0.657216	0.997423	0.005155	0.322165	0.559278	0.798969	0.994845	0.002577	0.208763	0.425258	0.734536	1	0.600515	0.092784	0.306701	0.03876	0.059432	0.007752	0.002577	0.280928	0.463918	0.791237	1	0.033505	0.118557	0.402062	0.572165	0.992268	0.048969	0.257732	0.626289	0.703608	0.974227	0.536082	0.377261	0.012887	0.257732	0.414948	0.739691	0.992268	0.466495
0.44	0.261818	0.298182	0.229927	0.226277	0.171533	0.018182	0.152727	0.370909	0.694545	1	0.007273	0.367273	0.534545	0.781818	0.945455	0.003636	0.345455	0.538182	0.745455	0.985455	0.407273	0.109091	0.483636	0.069343	0.054745	0.00365	0.003636	0.370909	0.64	0.829091	1	0.283636	0.36	0.538182	0.654545	0.927273	0.032727	0.149091	0.403636	0.596364	0.992727	0.421818	0.386861	0.014545	0.396364	0.549091	0.741818	0.996364	0.298182
0.433333	0.288889	0.277778	0.258427	0.247191	0.168539	0.033333	0.244444	0.5	0.777778	1	0.022222	0.155556	0.444444	0.622222	0.988889	0.011111	0.222222	0.433333	0.688889	0.955556	0.177778	0	0.822222	0	0.067416	0	0.011111	0.044444	0.711111	0.755556	1	0	0	0	0	0	0.055556	0.244444	0.488889	0.688889	0.977778	0.322222	0.426966	0.077778	0.355556	0.555556	0.688889	0.955556	0.266667
0.414634	0.231707	0.353659	0.234568	0.345679	0.135802	0.02439	0.243902	0.414634	0.682927	1	0.04878	0.390244	0.585366	0.768293	0.878049	0.012195	0.182927	0.45122	0.695122	0.987805	0.341463	0.304878	0.353659	0.098765	0.049383	0	0.012195	0.243902	0.414634	0.634146	1	0.304878	0.365854	0.47561	0.621951	0.987805	0.085366	0.158537	0.682927	0.768293	0.865854	0.487805	0.469136	0.04878	0.182927	0.560976	0.743902	0.97561	0.280488
0.457143	0.285714	0.257143	0.259615	0.192308	0.163462	0.019048	0.142857	0.428571	0.752381	1	0.028571	0.4	0.6	0.828571	0.990476	0.009524	0.238095	0.438095	0.685714	0.857143	0.714286	0.028571	0.257143	0.038462	0.038462	0	0.009524	0.171429	0.457143	0.819048	1	0.257143	0.257143	0.257143	0.266667	0.438095	0.314286	0.361905	0.571429	0.638095	0.704762	0.32381	0.384615	0.171429	0.342857	0.561905	0.695238	0.904762	0.295238
0.421569	0.279412	0.29902	0.241379	0.241379	0.162562	0.014706	0.205882	0.495098	0.754902	0.990196	0.009804	0.259804	0.490196	0.715686	0.980392	0.004902	0.254902	0.485294	0.740196	1	0.446078	0.382353	0.171569	0.167488	0.029557	0	0.004902	0.171569	0.54902	0.764706	1	0.078431	0.220588	0.509804	0.686275	0.965686	0.04902	0.416667	0.460784	0.823529	0.867647	0.460784	0.463054	0.019608	0.308824	0.519608	0.681373	0.955882	0.294118
0.318623	0.43248	0.248897	0.242049	0.174912	0.218198	0.00353	0.247132	0.507502	0.76346	0.992056	0.001765	0.313327	0.541041	0.759047	1	0.000883	0.181818	0.399823	0.699029	0.994704	0.640777	0.059135	0.300088	0.036219	0.060954	0.00265	0.000883	0.40865	0.578994	0.768756	1	0.007944	0.227714	0.739629	0.793469	0.954987	0.031774	0.157988	0.269197	0.390997	0.969991	0.424537	0.392226	0.002648	0.217123	0.445719	0.721977	0.978817	0.43248
0.33	0.31	0.36	0.262626	0.252525	0.222222	0.07	0.26	0.55	0.81	1	0.03	0.17	0.38	0.71	0.98	0.01	0.27	0.49	0.7	0.97	0.4	0.34	0.26	0.090909	0.050505	0.010101	0.01	0.16	0.38	0.61	1	0.09	0.41	0.54	0.68	0.96	0.19	0.24	0.73	0.79	0.89	0.46	0.464646	0.04	0.19	0.53	0.71	0.95	0.32
0.382576	0.511364	0.106061	0.353612	0.095057	0.091255	0.015152	0.223485	0.575758	0.768939	0.996212	0.011364	0.253788	0.435606	0.69697	1	0.003788	0.227273	0.632576	0.715909	0.988636	0.931818	0.011364	0.056818	0.015209	0.015209	0	0.003788	0.231061	0.473485	0.734848	1	0.32197	0.32197	0.32197	0.325758	0.67803	0.704545	0.712121	0.727273	0.761364	0.776515	0.147727	0.205323	0.087121	0.594697	0.712121	0.859848	0.988636	0.492424
0.411765	0.323529	0.264706	0.237037	0.214815	0.162963	0.029412	0.242647	0.544118	0.772059	1	0.014706	0.220588	0.514706	0.779412	0.955882	0.007353	0.264706	0.404412	0.683824	0.926471	0.441176	0.191176	0.367647	0.051852	0.081481	0.022222	0.007353	0.220588	0.705882	0.830882	1	0.154412	0.191176	0.676471	0.889706	0.941176	0.029412	0.25	0.375	0.5	0.639706	0.433824	0.444444	0.051471	0.294118	0.514706	0.742647	0.926471	0.323529
0.40625	0.395833	0.197917	0.315789	0.2	0.126316	0.052083	0.21875	0.447917	0.729167	1	0.020833	0.197917	0.489583	0.6875	0.947917	0.010417	0.322917	0.5	0.791667	0.958333	0.583333	0.3125	0.104167	0.094737	0.052632	0.010526	0.010417	0.145833	0.333333	0.520833	1	0.40625	0.65625	0.760417	0.854167	0.979167	0.28125	0.291667	0.572917	0.59375	0.947917	0.427083	0.4	0.114583	0.354167	0.541667	0.75	0.958333	0.4375
0.39011	0.274725	0.335165	0.206612	0.267218	0.217631	0.005495	0.282967	0.519231	0.774725	0.997253	0.019231	0.241758	0.497253	0.695055	0.991758	0.002747	0.21978	0.478022	0.728022	1	0.543956	0.178571	0.277473	0.063361	0.052342	0.008264	0.002747	0.277473	0.480769	0.741758	1	0.076923	0.14011	0.667582	0.799451	0.994505	0.038462	0.228022	0.392857	0.722527	0.912088	0.453297	0.380165	0.016484	0.239011	0.510989	0.730769	0.986264	0.326923
0.445378	0.218487	0.336134	0.118644	0.322034	0.169492	0.016807	0.210084	0.521008	0.705882	0.991597	0.07563	0.235294	0.571429	0.848739	0.941176	0.008403	0.243697	0.436975	0.630252	1	0.470588	0.042017	0.487395	0.008475	0.127119	0.008475	0.008403	0.134454	0.722689	0.848739	1	0.151261	0.151261	0.159664	0.168067	0.184874	0.02521	0.319328	0.504202	0.621849	0.983193	0.403361	0.389831	0.033613	0.201681	0.411765	0.714286	0.966387	0.201681
0.347826	0.336957	0.315217	0.230769	0.208791	0.197802	0.054348	0.195652	0.423913	0.836957	0.978261	0.021739	0.391304	0.630435	0.76087	1	0.01087	0.184783	0.347826	0.608696	0.804348	0.467391	0.358696	0.173913	0.10989	0.043956	0.021978	0.01087	0.315217	0.73913	0.880435	1	0.25	0.369565	0.48913	0.597826	0.782609	0.032609	0.108696	0.152174	0.195652	0.663043	0.456522	0.285714	0.097826	0.293478	0.456522	0.630435	0.793478	0.293478
0.313953	0.313123	0.372924	0.203658	0.226933	0.237739	0.003322	0.215116	0.497508	0.769103	0.999169	0.001661	0.288206	0.503322	0.753322	1	0.000831	0.240033	0.486711	0.740864	0.998339	0.297342	0.017442	0.685216	0.009144	0.103907	0.002494	0.000831	0.320598	0.581395	0.789867	1	0.408638	0.608804	0.83804	0.973422	0.997508	0.002492	0.213455	0.464286	0.726744	0.9701	0.604651	0.36409	0.002492	0.262458	0.475914	0.723422	0.998339	0.354651
0.450867	0.236994	0.312139	0.209302	0.290698	0.174419	0.011561	0.277457	0.485549	0.83237	0.99422	0.075145	0.225434	0.531792	0.728324	0.988439	0.00578	0.202312	0.456647	0.65896	1	0.364162	0.283237	0.352601	0.122093	0.063953	0.005814	0.00578	0.138728	0.508671	0.722543	1	0.011561	0.213873	0.531792	0.751445	0.843931	0.052023	0.289017	0.375723	0.589595	0.976879	0.352601	0.44186	0.017341	0.179191	0.456647	0.65896	0.930636	0.265896
0.392135	0.267416	0.340449	0.208099	0.271091	0.1991	0.004494	0.17191	0.408989	0.721348	0.998876	0.002247	0.295506	0.519101	0.793258	0.988764	0.001124	0.303371	0.540449	0.766292	1	0.333708	0.094382	0.57191	0.035996	0.094488	0.008999	0.001124	0.224719	0.41573	0.810112	1	0.053933	0.330337	0.742697	0.907865	0.988764	0.003371	0.25618	0.486517	0.704494	0.997753	0.558427	0.418448	0.003371	0.34382	0.546067	0.766292	0.996629	0.28764
0.322034	0.40113	0.276836	0.244318	0.210227	0.227273	0.016949	0.231638	0.451977	0.655367	0.977401	0.011299	0.248588	0.548023	0.779661	1	0.00565	0.214689	0.457627	0.762712	0.943503	0.40678	0.259887	0.333333	0.096591	0.0625	0.017045	0.00565	0.169492	0.519774	0.762712	1	0.112994	0.276836	0.615819	0.841808	0.926554	0.045198	0.355932	0.440678	0.649718	0.949153	0.40113	0.477273	0.028249	0.248588	0.497175	0.723164	0.949153	0.355932
0.329412	0.4	0.270588	0.22619	0.22619	0.22619	0.035294	0.294118	0.517647	0.682353	0.988235	0.023529	0.188235	0.435294	0.776471	0.976471	0.011765	0.164706	0.458824	0.670588	1	0.529412	0.258824	0.211765	0.142857	0.047619	0	0.011765	0.2	0.517647	0.788235	1	0.070588	0.552941	0.647059	0.764706	0.941176	0.141176	0.235294	0.294118	0.341176	0.4	0.447059	0.52381	0.058824	0.270588	0.6	0.776471	0.952941	0.329412
0.373913	0.330435	0.295652	0.22807	0.210526	0.201754	0.017391	0.226087	0.530435	0.791304	0.991304	0.034783	0.191304	0.382609	0.678261	1	0.008696	0.26087	0.591304	0.730435	0.965217	0.391304	0.165217	0.443478	0.04386	0.096491	0.008772	0.008696	0.2	0.356522	0.765217	1	0.234783	0.26087	0.373913	0.417391	0.73913	0.034783	0.156522	0.547826	0.817391	0.930435	0.452174	0.368421	0.06087	0.373913	0.530435	0.730435	0.965217	0.295652
0.337025	0.356013	0.306962	0.240887	0.220285	0.202853	0.003165	0.251582	0.492089	0.724684	1	0.006329	0.21519	0.474684	0.78481	0.996835	0.001582	0.308544	0.518987	0.721519	0.985759	0.47943	0.045886	0.474684	0.019017	0.104596	0.009509	0.001582	0.126582	0.259494	0.612342	1	0.306962	0.503165	0.667722	0.963608	0.987342	0.006329	0.438291	0.620253	0.792722	0.949367	0.571203	0.393027	0.009494	0.264241	0.496835	0.716772	0.988924	0.387658
0.464103	0.310256	0.225641	0.275064	0.195373	0.151671	0.007692	0.292308	0.551282	0.771795	1	0.005128	0.212821	0.441026	0.725641	0.997436	0.002564	0.238462	0.45641	0.717949	0.946154	0.497436	0.158974	0.34359	0.071979	0.061697	0	0.002564	0.202564	0.446154	0.764103	1	0.007692	0.323077	0.5	0.689744	0.866667	0.048718	0.248718	0.584615	0.728205	0.928205	0.346154	0.359897	0.010256	0.238462	0.464103	0.725641	0.992308	0.317949
0.42602	0.318878	0.255102	0.273657	0.255754	0.150895	0.005102	0.298469	0.528061	0.719388	1	0.012755	0.191327	0.461735	0.778061	0.997449	0.002551	0.242347	0.459184	0.762755	0.984694	0.443878	0.114796	0.441327	0.066496	0.056266	0.01023	0.002551	0.265306	0.520408	0.831633	1	0.012755	0.403061	0.788265	0.857143	0.987245	0.109694	0.227041	0.346939	0.630102	0.956633	0.298469	0.378517	0.010204	0.178571	0.390306	0.72449	0.984694	0.352041
0.347911	0.330418	0.321672	0.218872	0.216926	0.236381	0.001944	0.237123	0.458698	0.718173	0.996113	0.007775	0.242954	0.50826	0.750243	0.999028	0.000972	0.262391	0.52964	0.773567	1	0.471331	0.200194	0.328474	0.070039	0.064202	0.007782	0.000972	0.272109	0.456754	0.746356	1	0.004859	0.283771	0.489796	0.742468	0.979592	0.015549	0.195335	0.601555	0.783285	0.897959	0.535471	0.340467	0.002915	0.250729	0.52964	0.762877	0.998056	0.360544
0.446809	0.312057	0.241135	0.264286	0.214286	0.15	0.014184	0.269504	0.560284	0.836879	1	0.042553	0.219858	0.382979	0.702128	0.985816	0.007092	0.198582	0.496454	0.680851	0.957447	0.652482	0.035461	0.312057	0.05	0.05	0.007143	0.007092	0.255319	0.425532	0.822695	1	0.333333	0.333333	0.539007	0.815603	0.865248	0.035461	0.106383	0.609929	0.687943	0.808511	0.304965	0.285714	0.021277	0.368794	0.539007	0.702128	0.957447	0.319149
0.366667	0.342857	0.290476	0.244019	0.239234	0.186603	0.028571	0.238095	0.5	0.790476	1	0.009524	0.261905	0.533333	0.77619	0.990476	0.004762	0.228571	0.457143	0.652381	0.890476	0.447619	0.380952	0.171429	0.119617	0.062201	0.004785	0.004762	0.27619	0.633333	0.819048	1	0.009524	0.290476	0.433333	0.609524	0.852381	0.07619	0.214286	0.257143	0.747619	0.952381	0.428571	0.45933	0.014286	0.242857	0.438095	0.657143	0.957143	0.371429
0.325991	0.348018	0.325991	0.230088	0.199115	0.238938	0.030837	0.246696	0.506608	0.69163	1	0.008811	0.198238	0.471366	0.740088	0.995595	0.004405	0.312775	0.53304	0.770925	0.991189	0.577093	0.229075	0.193833	0.075221	0.048673	0.013274	0.004405	0.176211	0.471366	0.69163	1	0.105727	0.365639	0.453744	0.784141	0.995595	0.264317	0.30837	0.546256	0.92511	0.977974	0.471366	0.415929	0.017621	0.361233	0.568282	0.806167	0.995595	0.321586
0.463087	0.288591	0.248322	0.236486	0.243243	0.128378	0.013423	0.261745	0.510067	0.838926	1	0.026846	0.201342	0.52349	0.66443	0.986577	0.006711	0.241611	0.449664	0.644295	0.865772	0.422819	0.248322	0.328859	0.128378	0.087838	0.02027	0.006711	0.288591	0.496644	0.731544	1	0.026846	0.348993	0.463087	0.57047	0.838926	0.060403	0.154362	0.657718	0.805369	0.979866	0.315436	0.364865	0.114094	0.302013	0.47651	0.651007	0.946309	0.275168
0.356164	0.383562	0.260274	0.282759	0.186207	0.2	0.041096	0.212329	0.506849	0.739726	0.972603	0.013699	0.239726	0.445205	0.712329	0.986301	0.006849	0.246575	0.59589	0.780822	1	0.486301	0.212329	0.30137	0.068966	0.055172	0	0.006849	0.267123	0.390411	0.650685	1	0.184932	0.458904	0.609589	0.80137	0.890411	0.034247	0.10274	0.541096	0.69863	0.965753	0.315068	0.441379	0.075342	0.438356	0.589041	0.760274	0.979452	0.363014
0.271429	0.4	0.328571	0.231884	0.26087	0.275362	0.114286	0.271429	0.514286	0.685714	0.957143	0.028571	0.157143	0.471429	0.8	1	0.014286	0.2	0.457143	0.757143	0.985714	0.414286	0.385714	0.2	0.188406	0.043478	0.043478	0.014286	0.142857	0.514286	0.7	1	0.042857	0.185714	0.642857	0.857143	0.985714	0.2	0.228571	0.285714	0.414286	0.5	0.357143	0.521739	0.057143	0.214286	0.385714	0.528571	0.971429	0.414286
0.296788	0.424142	0.27907	0.233925	0.149667	0.247228	0.00443	0.251384	0.417497	0.702104	0.993355	0.002215	0.241417	0.500554	0.730897	0.998893	0.001107	0.250277	0.554817	0.790698	1	0.728682	0.135105	0.136213	0.052106	0.043237	0.003326	0.001107	0.231451	0.440753	0.646733	1	0.045404	0.676633	0.787375	0.874862	0.991141	0.003322	0.178295	0.527132	0.82392	0.984496	0.334441	0.330377	0.005537	0.385382	0.677741	0.844961	0.996678	0.459579
0.479339	0.256198	0.264463	0.225	0.25	0.158333	0.016529	0.272727	0.603306	0.818182	1	0.033058	0.132231	0.404959	0.661157	0.975207	0.008264	0.247934	0.429752	0.669421	0.85124	0.396694	0.239669	0.363636	0.083333	0.083333	0.016667	0.008264	0.338843	0.553719	0.826446	1	0.033058	0.082645	0.404959	0.512397	0.760331	0.132231	0.214876	0.595041	0.710744	0.966942	0.429752	0.4	0.033058	0.214876	0.479339	0.652893	0.942149	0.214876
0.34143	0.438596	0.219973	0.268919	0.154054	0.195946	0.005398	0.225371	0.445344	0.748988	1	0.002699	0.261808	0.550607	0.774629	0.99865	0.00135	0.249663	0.418354	0.665317	0.983806	0.775978	0.087719	0.136302	0.051351	0.043243	0.005405	0.00135	0.249663	0.560054	0.796221	1	0.010796	0.265857	0.368421	0.483131	0.883941	0.021592	0.237517	0.34413	0.59919	0.960864	0.360324	0.32973	0.009447	0.249663	0.431849	0.574899	0.974359	0.45614
0.320755	0.396226	0.283019	0.247619	0.219048	0.190476	0.09434	0.226415	0.575472	0.745283	1	0.018868	0.283019	0.528302	0.801887	0.981132	0.009434	0.188679	0.377358	0.59434	0.943396	0.424528	0.575472	0	0.171429	0	0	0.009434	0.292453	0.613208	0.792453	1	0.018868	0.198113	0.386792	0.669811	0.95283	0	0	0	0	0	0.358491	0.47619	0.018868	0.188679	0.443396	0.679245	0.943396	0.339623
0.336	0.5136	0.1504	0.264423	0.129808	0.11859	0.0064	0.2992	0.4912	0.6992	0.9984	0.0032	0.184	0.5392	0.8	1	0.0016	0.2912	0.4624	0.6224	0.9712	0.7136	0.056	0.2304	0.030449	0.033654	0.004808	0.0016	0.2	0.496	0.7536	1	0.1488	0.4016	0.4304	0.5024	0.992	0.128	0.3376	0.5232	0.9008	0.9808	0.4544	0.384615	0.0048	0.3296	0.5632	0.8176	0.992	0.5232
0.360902	0.323308	0.315789	0.272727	0.227273	0.174242	0.037594	0.285714	0.466165	0.706767	0.984962	0.015038	0.180451	0.526316	0.774436	1	0.007519	0.240602	0.481203	0.766917	0.992481	0.368421	0.345865	0.285714	0.143939	0.05303	0.007576	0.007519	0.338346	0.556391	0.721805	1	0.180451	0.383459	0.586466	0.81203	0.992481	0.030075	0.090226	0.24812	0.315789	0.917293	0.458647	0.439394	0.037594	0.240602	0.503759	0.789474	0.992481	0.338346
0.339233	0.333333	0.327434	0.223043	0.22452	0.211226	0.00295	0.30826	0.529499	0.762537	1	0.007375	0.231563	0.466077	0.712389	0.99705	0.001475	0.221239	0.483776	0.752212	0.998525	0.353982	0.181416	0.464602	0.063516	0.081241	0.004431	0.001475	0.249263	0.579646	0.809735	1	0.029499	0.240413	0.668142	0.867257	0.963127	0.007375	0.265487	0.446903	0.646018	0.9941	0.528024	0.398818	0.00885	0.212389	0.455752	0.69764	0.995575	0.340708
0.417219	0.241722	0.34106	0.202658	0.272425	0.169435	0.009934	0.221854	0.506623	0.748344	1	0.006623	0.321192	0.519868	0.705298	0.993377	0.003311	0.231788	0.453642	0.751656	0.990066	0.519868	0.304636	0.175497	0.109635	0.049834	0.009967	0.003311	0.251656	0.44702	0.778146	1	0.006623	0.304636	0.586093	0.745033	0.963576	0.029801	0.096026	0.387417	0.539735	0.993377	0.509934	0.358804	0.013245	0.31457	0.503311	0.774834	0.990066	0.228477
0.340102	0.345178	0.314721	0.229008	0.229008	0.223919	0.007614	0.271574	0.497462	0.763959	0.997462	0.005076	0.228426	0.472081	0.746193	0.989848	0.002538	0.243655	0.520305	0.738579	1	0.467005	0.213198	0.319797	0.083969	0.089059	0.017812	0.002538	0.238579	0.459391	0.751269	1	0.017766	0.335025	0.558376	0.738579	0.92132	0.048223	0.203046	0.525381	0.771574	0.984772	0.527919	0.437659	0.017766	0.261421	0.530457	0.741117	0.994924	0.383249
0.389831	0.336158	0.274011	0.271955	0.229462	0.164306	0.016949	0.248588	0.471751	0.737288	1	0.00565	0.279661	0.550847	0.779661	0.997175	0.002825	0.206215	0.463277	0.683616	0.99435	0.562147	0.163842	0.274011	0.062323	0.056657	0.005666	0.002825	0.30791	0.528249	0.816384	1	0.090395	0.149718	0.542373	0.70339	0.799435	0.016949	0.234463	0.347458	0.728814	0.867232	0.412429	0.373938	0.025424	0.228814	0.432203	0.686441	0.988701	0.384181
0.374384	0.310345	0.315271	0.2357	0.247535	0.206114	0.004926	0.202956	0.439409	0.743842	0.99803	0.00197	0.234483	0.528079	0.745813	0.993103	0.000985	0.320197	0.538916	0.759606	1	0.470936	0.110345	0.418719	0.043393	0.092702	0.003945	0.000985	0.151724	0.433498	0.771429	1	0.008867	0.525123	0.611823	0.93399	0.994089	0.003941	0.298522	0.482759	0.707389	0.99803	0.430542	0.386588	0.003941	0.357635	0.551724	0.738916	0.996059	0.358621
0.34507	0.302817	0.352113	0.241135	0.22695	0.212766	0.035211	0.21831	0.464789	0.647887	0.957746	0.014085	0.267606	0.577465	0.823944	0.985915	0.007042	0.197183	0.450704	0.732394	1	0.380282	0.352113	0.267606	0.163121	0.049645	0.007092	0.007042	0.316901	0.556338	0.732394	1	0.169014	0.422535	0.577465	0.816901	0.992958	0.042254	0.098592	0.232394	0.295775	0.922535	0.478873	0.347518	0.035211	0.253521	0.612676	0.809859	1	0.316901
0.446429	0.196429	0.357143	0.153153	0.306306	0.171171	0.017857	0.1875	0.535714	0.821429	1	0.044643	0.276786	0.401786	0.625	0.955357	0.008929	0.223214	0.464286	0.714286	0.991071	0.294643	0.232143	0.473214	0.09009	0.072072	0	0.008929	0.1875	0.401786	0.678571	1	0.035714	0.196429	0.276786	0.366071	0.723214	0.098214	0.446429	0.5625	0.839286	0.964286	0.428571	0.396396	0.044643	0.276786	0.464286	0.705357	0.928571	0.160714
0.372093	0.353488	0.274419	0.275701	0.200935	0.17757	0.009302	0.2	0.47907	0.739535	0.995349	0.046512	0.293023	0.446512	0.734884	1	0.004651	0.148837	0.562791	0.790698	0.990698	0.534884	0.148837	0.316279	0.084112	0.065421	0	0.004651	0.274419	0.418605	0.702326	1	0.009302	0.065116	0.567442	0.725581	0.934884	0.093023	0.195349	0.544186	0.804651	0.990698	0.516279	0.35514	0.013953	0.334884	0.511628	0.776744	0.990698	0.348837
0.367816	0.275862	0.356322	0.255814	0.290698	0.186047	0.034483	0.252874	0.482759	0.770115	1	0.126437	0.275862	0.574713	0.747126	0.965517	0.011494	0.114943	0.413793	0.643678	0.988506	0.448276	0.321839	0.229885	0.139535	0.046512	0	0.011494	0.229885	0.643678	0.793103	1	0.045977	0.298851	0.597701	0.816092	0.954023	0.137931	0.183908	0.390805	0.448276	0.505747	0.367816	0.418605	0.045977	0.206897	0.45977	0.62069	0.977011	0.321839
0.358108	0.378378	0.263514	0.333333	0.210884	0.136054	0.054054	0.331081	0.540541	0.702703	0.993243	0.02027	0.22973	0.614865	0.831081	1	0.006757	0.128378	0.304054	0.513514	0.871622	0.506757	0.371622	0.121622	0.108844	0.027211	0	0.006757	0.425676	0.675676	0.810811	1	0.094595	0.189189	0.304054	0.452703	0.871622	0.027027	0.047297	0.5	0.527027	0.560811	0.47973	0.367347	0.02027	0.243243	0.452703	0.817568	0.986486	0.412162
0.37218	0.342105	0.285714	0.279245	0.2	0.166038	0.007519	0.259398	0.578947	0.808271	1	0.018797	0.236842	0.466165	0.770677	0.992481	0.003759	0.203008	0.443609	0.62406	0.921053	0.296992	0.097744	0.605263	0.033962	0.09434	0.003774	0.003759	0.146617	0.575188	0.857143	1	0.112782	0.669173	0.710526	0.733083	0.766917	0.018797	0.225564	0.43985	0.620301	0.928571	0.43985	0.316981	0.011278	0.191729	0.413534	0.590226	0.921053	0.345865
0.394937	0.263291	0.341772	0.19797	0.291878	0.208122	0.005063	0.227848	0.475949	0.764557	1	0.012658	0.298734	0.577215	0.75443	0.989873	0.002532	0.225316	0.470886	0.726582	0.994937	0.321519	0.270886	0.407595	0.083756	0.068528	0.002538	0.002532	0.227848	0.546835	0.751899	1	0.106329	0.35443	0.473418	0.610127	0.918987	0.005063	0.255696	0.524051	0.855696	0.994937	0.493671	0.390863	0.010127	0.286076	0.526582	0.729114	0.994937	0.278481
0.431138	0.341317	0.227545	0.204819	0.174699	0.156627	0.011976	0.305389	0.443114	0.634731	1	0.017964	0.179641	0.556886	0.742515	0.964072	0.005988	0.137725	0.60479	0.808383	0.994012	0.586826	0.137725	0.275449	0.036145	0.060241	0	0.005988	0.179641	0.365269	0.532934	1	0.101796	0.125749	0.874251	0.958084	0.994012	0.257485	0.580838	0.652695	0.754491	0.826347	0.413174	0.289157	0.023952	0.197605	0.628743	0.802395	0.988024	0.323353
0.359807	0.395909	0.244284	0.271084	0.174699	0.192771	0.00361	0.222623	0.498195	0.748496	0.997593	0.002407	0.219013	0.510229	0.754513	1	0.001203	0.300842	0.482551	0.728039	0.998797	0.503008	0.137184	0.359807	0.056627	0.071084	0.003614	0.001203	0.135981	0.357401	0.66065	1	0.00722	0.365824	0.524669	0.68231	0.930205	0.174489	0.399519	0.623345	0.847172	0.99639	0.45367	0.320482	0.006017	0.330927	0.534296	0.726835	0.99639	0.434416
0.341394	0.364154	0.294452	0.225071	0.225071	0.202279	0.002845	0.273115	0.529161	0.773826	0.998578	0.004267	0.213371	0.416785	0.661451	0.997155	0.001422	0.295875	0.587482	0.776671	1	0.473684	0.027027	0.499289	0.011396	0.105413	0.002849	0.001422	0.220484	0.357041	0.485064	1	0.00569	0.009957	0.153627	0.290185	0.524893	0.029872	0.517781	0.678521	0.83926	0.99431	0.573257	0.430199	0.00569	0.294452	0.519203	0.739687	0.99431	0.366999
0.319635	0.424658	0.255708	0.302752	0.169725	0.192661	0.013699	0.260274	0.515982	0.789954	1	0.009132	0.200913	0.520548	0.73516	0.995434	0.004566	0.296804	0.479452	0.666667	0.894977	0.406393	0.420091	0.173516	0.119266	0.055046	0	0.004566	0.273973	0.611872	0.789954	1	0.027397	0.30137	0.47032	0.598174	0.821918	0.086758	0.123288	0.26484	0.872146	0.986301	0.406393	0.412844	0.031963	0.251142	0.43379	0.648402	0.858447	0.43379
0.432773	0.273109	0.294118	0.261603	0.291139	0.151899	0.008403	0.218487	0.537815	0.777311	1	0.02521	0.256303	0.420168	0.710084	0.991597	0.004202	0.260504	0.512605	0.739496	0.97479	0.44958	0.310924	0.239496	0.135021	0.067511	0	0.004202	0.247899	0.483193	0.714286	1	0.113445	0.256303	0.466387	0.722689	0.920168	0.008403	0.084034	0.504202	0.781513	0.970588	0.512605	0.447257	0.012605	0.298319	0.5	0.739496	0.983193	0.247899
0.432432	0.256757	0.310811	0.191781	0.246575	0.150685	0.040541	0.27027	0.554054	0.72973	0.945946	0.027027	0.148649	0.391892	0.837838	1	0.013514	0.175676	0.472973	0.608108	0.851351	0.351351	0.27027	0.378378	0.082192	0.054795	0	0.013514	0.27027	0.716216	0.905405	1	0.310811	0.608108	0.675676	0.810811	0.878378	0.067568	0.148649	0.243243	0.459459	0.554054	0.418919	0.356164	0.054054	0.162162	0.418919	0.608108	0.878378	0.27027
0.391892	0.304054	0.304054	0.278912	0.258503	0.142857	0.033784	0.222973	0.47973	0.777027	1	0.013514	0.202703	0.452703	0.736486	0.952703	0.006757	0.25	0.506757	0.702703	0.986486	0.493243	0.222973	0.283784	0.061224	0.047619	0.006803	0.006757	0.304054	0.601351	0.77027	1	0.358108	0.405405	0.567568	0.709459	0.878378	0.060811	0.121622	0.195946	0.472973	0.945946	0.412162	0.272109	0.060811	0.459459	0.621622	0.736486	0.939189	0.310811
0.304553	0.414443	0.281005	0.215409	0.168239	0.254717	0.006279	0.194662	0.4427	0.816327	0.99529	0.00314	0.262166	0.511774	0.682889	1	0.00157	0.260597	0.510204	0.77865	0.99686	0.637363	0.139717	0.22292	0.06761	0.064465	0.001572	0.00157	0.21978	0.527473	0.693878	1	0.100471	0.277865	0.425432	0.850863	0.981162	0.023548	0.232339	0.44898	0.77865	0.956044	0.544741	0.279874	0.015699	0.362637	0.583987	0.728414	0.99686	0.437991
0.34662	0.414211	0.239168	0.236111	0.170139	0.199653	0.003466	0.275563	0.481802	0.717504	0.996534	0.006932	0.233969	0.551127	0.760832	1	0.001733	0.242634	0.433276	0.753899	0.993068	0.594454	0.02253	0.383016	0.010417	0.100694	0.013889	0.001733	0.207972	0.514731	0.755633	1	0.02773	0.031196	0.554593	0.712305	0.816291	0.045061	0.311958	0.464471	0.69844	0.994801	0.384749	0.357639	0.010399	0.244367	0.485269	0.769497	0.993068	0.410745
0.373333	0.36	0.266667	0.263393	0.214286	0.174107	0.008889	0.253333	0.475556	0.715556	1	0.022222	0.315556	0.551111	0.746667	0.991111	0.004444	0.182222	0.4	0.755556	0.977778	0.555556	0.2	0.244444	0.089286	0.053571	0	0.004444	0.306667	0.511111	0.666667	1	0.035556	0.231111	0.364444	0.808889	0.986667	0.088889	0.142222	0.408889	0.755556	0.92	0.408889	0.375	0.035556	0.226667	0.404444	0.742222	0.986667	0.355556
0.336134	0.386555	0.277311	0.20339	0.152542	0.245763	0.016807	0.159664	0.378151	0.638655	0.991597	0.05042	0.302521	0.605042	0.798319	1	0.008403	0.218487	0.462185	0.697479	0.97479	0.403361	0.168067	0.428571	0.067797	0.067797	0	0.008403	0.176471	0.336134	0.689076	1	0.033613	0.226891	0.394958	0.436975	0.747899	0.067227	0.487395	0.596639	0.87395	0.983193	0.453782	0.355932	0.033613	0.386555	0.537815	0.731092	0.97479	0.403361
0.34375	0.330357	0.325893	0.215247	0.282511	0.206278	0.017857	0.245536	0.477679	0.799107	1	0.008929	0.200893	0.513393	0.709821	0.995536	0.004464	0.254464	0.482143	0.705357	0.9375	0.459821	0.379464	0.160714	0.116592	0.06278	0.008969	0.004464	0.325893	0.629464	0.821429	1	0.022321	0.209821	0.424107	0.607143	0.857143	0.089286	0.125	0.272321	0.732143	0.924107	0.40625	0.430493	0.026786	0.25	0.4375	0.651786	0.9375	0.370536
0.302817	0.341549	0.355634	0.201413	0.215548	0.275618	0.017606	0.285211	0.507042	0.778169	0.996479	0.007042	0.228873	0.475352	0.711268	1	0.003521	0.232394	0.485915	0.725352	0.992958	0.415493	0.151408	0.433099	0.042403	0.091873	0	0.003521	0.179577	0.419014	0.690141	1	0.193662	0.285211	0.605634	0.644366	0.728873	0.045775	0.253521	0.528169	0.830986	0.992958	0.556338	0.424028	0.010563	0.235915	0.475352	0.679577	0.985915	0.352113
0.40038	0.337761	0.26186	0.285171	0.224335	0.15019	0.005693	0.225806	0.426945	0.709677	0.996205	0.003795	0.210626	0.455408	0.732448	1	0.001898	0.42315	0.601518	0.802657	0.998102	0.563567	0.148008	0.288425	0.060837	0.04943	0.015209	0.001898	0.189753	0.347249	0.658444	1	0.055028	0.402277	0.667932	0.793169	0.973435	0.00759	0.442125	0.593928	0.806452	0.994307	0.436433	0.406844	0.013283	0.383302	0.574953	0.798861	0.99241	0.368121
0.473118	0.311828	0.215054	0.293478	0.217391	0.119565	0.053763	0.215054	0.430108	0.763441	1	0.021505	0.247312	0.537634	0.752688	0.978495	0.010753	0.322581	0.419355	0.666667	0.946237	0.193548	0.043011	0.763441	0.021739	0.065217	0	0.010753	0.043011	0.677419	0.763441	1	0.709677	0.709677	0.72043	0.731183	0.741935	0.053763	0.225806	0.419355	0.645161	0.978495	0.258065	0.369565	0.075269	0.344086	0.548387	0.688172	0.946237	0.27957
0.345397	0.398899	0.255704	0.258268	0.174803	0.219685	0.001574	0.250197	0.442958	0.804091	0.998426	0.00236	0.270653	0.536585	0.734854	1	0.000787	0.203777	0.488592	0.704957	0.993706	0.70417	0.060582	0.235248	0.037795	0.059843	0.00315	0.000787	0.338316	0.594807	0.795437	1	0.04878	0.399685	0.449253	0.641227	0.994493	0.001574	0.087333	0.20535	0.390244	0.976397	0.40834	0.370079	0.00236	0.284815	0.535012	0.738788	0.993706	0.422502
0.408163	0.251701	0.340136	0.239726	0.287671	0.157534	0.013605	0.285714	0.47619	0.707483	1	0.068027	0.176871	0.469388	0.721088	0.993197	0.006803	0.204082	0.517007	0.768707	0.972789	0.367347	0.29932	0.333333	0.109589	0.068493	0.013699	0.006803	0.14966	0.510204	0.741497	1	0.013605	0.244898	0.619048	0.891156	0.986395	0.061224	0.326531	0.408163	0.489796	0.816327	0.380952	0.452055	0.020408	0.204082	0.537415	0.727891	0.972789	0.278912
0.377892	0.401028	0.22108	0.31701	0.164948	0.167526	0.012853	0.241645	0.462725	0.676093	1	0.005141	0.287918	0.529563	0.745501	0.982005	0.002571	0.190231	0.496144	0.794344	0.997429	0.706941	0.100257	0.192802	0.051546	0.072165	0.015464	0.002571	0.22365	0.421594	0.696658	1	0.007712	0.208226	0.51671	0.820051	0.987147	0.069409	0.478149	0.670951	0.861183	0.992288	0.352185	0.28866	0.010283	0.210797	0.467866	0.760925	0.997429	0.413882
0.405882	0.317647	0.276471	0.289941	0.236686	0.171598	0.011765	0.294118	0.505882	0.776471	1	0.076471	0.235294	0.511765	0.705882	0.988235	0.005882	0.123529	0.441176	0.682353	0.911765	0.370588	0.282353	0.347059	0.118343	0.059172	0.011834	0.005882	0.135294	0.517647	0.735294	1	0.011765	0.217647	0.541176	0.770588	0.858824	0.147059	0.294118	0.382353	0.594118	0.976471	0.352941	0.43787	0.017647	0.182353	0.488235	0.682353	0.911765	0.376471
0.429091	0.436364	0.134545	0.416058	0.120438	0.124088	0.010909	0.298182	0.563636	0.792727	1	0.007273	0.276364	0.487273	0.723636	0.996364	0.003636	0.109091	0.243636	0.632727	0.938182	0.810909	0.098182	0.090909	0.036496	0.029197	0	0.003636	0.367273	0.570909	0.781818	1	0.029091	0.12	0.145455	0.28	0.938182	0.072727	0.090909	0.210909	0.232727	0.807273	0.258182	0.335766	0.029091	0.145455	0.294545	0.512727	0.949091	0.443636
0.388005	0.359853	0.252142	0.259804	0.189951	0.186275	0.002448	0.198286	0.477356	0.74541	1	0.004896	0.27907	0.511628	0.761322	0.995104	0.001224	0.307222	0.50918	0.728274	0.996328	0.518972	0.132191	0.348837	0.050245	0.08701	0.006127	0.001224	0.177479	0.396573	0.725826	1	0.04284	0.358629	0.559364	0.698898	0.990208	0.045288	0.365973	0.575275	0.80661	0.979192	0.433293	0.311275	0.04284	0.362301	0.528764	0.734394	0.996328	0.400245
0.358156	0.539007	0.102837	0.469751	0.085409	0.096085	0.01773	0.248227	0.446809	0.716312	0.989362	0.007092	0.35461	0.585106	0.765957	1	0.003546	0.06383	0.159574	0.301418	0.992908	0.826241	0.088652	0.085106	0.02847	0.021352	0	0.003546	0.365248	0.570922	0.776596	1	0.049645	0.141844	0.163121	0.216312	0.315603	0.095745	0.113475	0.234043	0.255319	0.921986	0.312057	0.320285	0.010638	0.141844	0.29078	0.514184	0.932624	0.5
0.377778	0.316667	0.305556	0.251397	0.27933	0.184358	0.016667	0.2	0.5	0.772222	1	0.027778	0.277778	0.455556	0.7	0.977778	0.005556	0.238889	0.516667	0.727778	0.988889	0.4	0.394444	0.205556	0.145251	0.03352	0	0.005556	0.222222	0.538889	0.866667	1	0.038889	0.177778	0.483333	0.672222	0.972222	0.338889	0.383333	0.433333	0.805556	0.861111	0.488889	0.469274	0.027778	0.372222	0.516667	0.716667	0.961111	0.327778
0.411765	0.235294	0.352941	0.223881	0.283582	0.104478	0.044118	0.294118	0.588235	0.808824	0.985294	0.029412	0.25	0.411765	0.705882	0.970588	0.014706	0.191176	0.441176	0.617647	1	0.485294	0.161765	0.352941	0.149254	0.059701	0	0.014706	0.147059	0.279412	0.661765	1	0.058824	0.088235	0.308824	0.426471	0.470588	0.514706	0.588235	0.735294	0.823529	0.911765	0.323529	0.447761	0.058824	0.205882	0.426471	0.602941	0.838235	0.338235
0.365854	0.273171	0.360976	0.190709	0.249389	0.215159	0.004878	0.290244	0.560976	0.814634	0.997561	0.009756	0.236585	0.502439	0.736585	0.990244	0.002439	0.226829	0.436585	0.687805	1	0.356098	0.182927	0.460976	0.056235	0.100244	0.007335	0.002439	0.25122	0.54878	0.760976	1	0.085366	0.241463	0.443902	0.656098	0.780488	0.012195	0.209756	0.5	0.804878	0.973171	0.52439	0.337408	0.007317	0.202439	0.392683	0.663415	0.94878	0.256098
0.34126	0.311534	0.347206	0.211905	0.264286	0.213095	0.003567	0.248514	0.483948	0.751486	0.995244	0.002378	0.241379	0.543401	0.776457	1	0.001189	0.250892	0.48038	0.709869	0.998811	0.454221	0.197384	0.348395	0.080952	0.085714	0.007143	0.001189	0.24019	0.487515	0.740785	1	0.005945	0.210464	0.428062	0.812128	0.902497	0.070155	0.262782	0.551724	0.758621	0.997622	0.521998	0.457143	0.004756	0.239001	0.488704	0.760999	0.998811	0.323424
0.334158	0.363861	0.30198	0.265509	0.203474	0.220844	0.00495	0.279703	0.579208	0.824257	1	0.007426	0.252475	0.507426	0.747525	0.997525	0.002475	0.215347	0.418317	0.643564	0.938119	0.356436	0.059406	0.584158	0.034739	0.08933	0.004963	0.002475	0.25495	0.591584	0.871287	1	0.042079	0.079208	0.094059	0.413366	0.962871	0.007426	0.294554	0.487624	0.660891	0.908416	0.534653	0.411911	0.009901	0.277228	0.517327	0.695545	0.987624	0.39604
0.300373	0.419776	0.279851	0.214953	0.181308	0.246729	0.005597	0.20709	0.43097	0.76306	0.996269	0.009328	0.31903	0.576493	0.742537	1	0.001866	0.231343	0.466418	0.73694	0.981343	0.632463	0.160448	0.20709	0.059813	0.052336	0	0.001866	0.276119	0.567164	0.727612	1	0.016791	0.171642	0.335821	0.848881	0.981343	0.035448	0.218284	0.438433	0.779851	0.955224	0.626866	0.261682	0.009328	0.333955	0.552239	0.723881	0.981343	0.440299
0.45092	0.392638	0.156442	0.378462	0.12	0.098462	0.006135	0.315951	0.527607	0.760736	0.993865	0.009202	0.340491	0.625767	0.834356	1	0.003067	0.113497	0.199387	0.312883	0.745399	0.671779	0.101227	0.226994	0.067692	0.092308	0	0.003067	0.346626	0.558282	0.757669	1	0.052147	0.122699	0.233129	0.325153	0.518405	0.01227	0.171779	0.47546	0.806748	0.98773	0.220859	0.276923	0.009202	0.156442	0.257669	0.441718	0.97546	0.380368
0.406926	0.372294	0.220779	0.304348	0.16087	0.182609	0.012987	0.264069	0.47619	0.731602	1	0.008658	0.212121	0.502165	0.766234	0.995671	0.004329	0.199134	0.463203	0.727273	0.930736	0.549784	0.090909	0.359307	0.047826	0.056522	0.004348	0.004329	0.337662	0.619048	0.757576	1	0.017316	0.056277	0.333333	0.52381	0.978355	0.077922	0.168831	0.380952	0.562771	0.904762	0.320346	0.382609	0.017316	0.199134	0.497835	0.753247	0.969697	0.337662
0.348985	0.376904	0.274112	0.222363	0.212198	0.184244	0.005076	0.21066	0.430203	0.663706	0.994924	0.002538	0.248731	0.590102	0.760152	0.998731	0.001269	0.30203	0.497462	0.800761	1	0.534264	0.025381	0.440355	0.012706	0.071156	0.005083	0.001269	0.190355	0.527919	0.69797	1	0.008883	0.040609	0.130711	0.142132	0.988579	0.034264	0.335025	0.497462	0.854061	0.994924	0.461929	0.376112	0.006345	0.313452	0.545685	0.734772	0.997462	0.42132
0.341463	0.402439	0.256098	0.294479	0.134969	0.214724	0.02439	0.268293	0.542683	0.841463	0.993902	0.012195	0.207317	0.457317	0.676829	1	0.006098	0.231707	0.487805	0.689024	0.957317	0.402439	0.286585	0.310976	0.079755	0.055215	0.018405	0.006098	0.140244	0.445122	0.658537	1	0.091463	0.213415	0.396341	0.707317	0.804878	0.018293	0.536585	0.621951	0.896341	0.97561	0.445122	0.331288	0.091463	0.262195	0.439024	0.689024	0.957317	0.384146
0.32526	0.404844	0.269896	0.253472	0.170139	0.21875	0.013841	0.245675	0.49827	0.799308	0.99308	0.00692	0.249135	0.515571	0.712803	0.99654	0.00346	0.231834	0.439446	0.723183	1	0.709343	0.155709	0.134948	0.090278	0.055556	0.006944	0.00346	0.33564	0.553633	0.740484	1	0.089965	0.217993	0.283737	0.854671	0.989619	0.017301	0.183391	0.311419	0.401384	0.979239	0.588235	0.319444	0.024221	0.342561	0.567474	0.726644	0.989619	0.370242
0.316742	0.361991	0.321267	0.204545	0.240909	0.236364	0.00905	0.253394	0.434389	0.719457	0.995475	0.013575	0.276018	0.579186	0.737557	1	0.004525	0.180995	0.466063	0.751131	0.963801	0.59276	0.361991	0.045249	0.109091	0.027273	0	0.004525	0.303167	0.570136	0.751131	1	0.022624	0.140271	0.411765	0.81448	0.968326	0.330317	0.343891	0.357466	0.60181	0.615385	0.542986	0.309091	0.022624	0.226244	0.552036	0.773756	0.977376	0.375566
0.391003	0.290657	0.318339	0.211438	0.256499	0.162912	0.00692	0.299308	0.569204	0.83218	0.99654	0.00346	0.200692	0.50173	0.721453	0.986159	0.00173	0.214533	0.451557	0.688581	1	0.366782	0.141869	0.491349	0.051993	0.083189	0.003466	0.00173	0.238754	0.532872	0.780277	1	0.084775	0.237024	0.382353	0.543253	0.756055	0.022491	0.252595	0.525952	0.83737	0.99481	0.489619	0.34662	0.010381	0.202422	0.422145	0.610727	0.99308	0.32872
0.366972	0.321101	0.311927	0.259259	0.25	0.185185	0.045872	0.266055	0.495413	0.798165	1	0.018349	0.247706	0.46789	0.66055	0.944954	0.009174	0.192661	0.486239	0.715596	0.972477	0.302752	0.266055	0.431193	0.092593	0.074074	0.018519	0.009174	0.247706	0.522936	0.642202	1	0.155963	0.211009	0.568807	0.688073	0.963303	0.027523	0.119266	0.357798	0.788991	0.926606	0.477064	0.444444	0.027523	0.220183	0.522936	0.715596	0.954128	0.302752
0.355362	0.397756	0.246883	0.267166	0.168539	0.179775	0.013716	0.278055	0.586035	0.811721	1	0.002494	0.225686	0.498753	0.766833	0.993766	0.001247	0.23192	0.405237	0.620948	0.997506	0.490025	0.117207	0.392768	0.052434	0.082397	0.002497	0.001247	0.238155	0.567332	0.812968	1	0.125935	0.286783	0.413965	0.509975	0.845387	0.03616	0.256858	0.517456	0.682045	0.997506	0.4202	0.337079	0.004988	0.216958	0.395262	0.584788	0.976309	0.413965
0.309108	0.366145	0.324747	0.229282	0.221915	0.223757	0.00184	0.26219	0.515179	0.765409	0.99724	0.00368	0.25115	0.484821	0.74057	0.99908	0.00092	0.23827	0.5023	0.74609	1	0.414903	0.130635	0.454462	0.046961	0.069061	0.000921	0.00092	0.282429	0.49126	0.74425	1	0.048758	0.135235	0.477461	0.73781	0.955842	0.00736	0.228151	0.536339	0.766329	0.980681	0.5023	0.441989	0.00276	0.25115	0.49954	0.74977	0.99632	0.402944
0.428571	0.209184	0.362245	0.184615	0.353846	0.14359	0.02551	0.209184	0.464286	0.765306	1	0.015306	0.30102	0.520408	0.719388	0.959184	0.005102	0.239796	0.484694	0.72449	0.994898	0.494898	0.142857	0.362245	0.082051	0.082051	0.020513	0.005102	0.163265	0.520408	0.72449	1	0.214286	0.25	0.586735	0.688776	0.964286	0.020408	0.341837	0.44898	0.755102	0.984694	0.44898	0.410256	0.030612	0.362245	0.510204	0.739796	0.984694	0.219388
0.236273	0.544093	0.219634	0.191667	0.115	0.213333	0.013311	0.207987	0.396007	0.640599	0.995008	0.003328	0.294509	0.559068	0.748752	1	0.001664	0.237937	0.439268	0.78203	0.998336	0.745424	0.129784	0.124792	0.053333	0.023333	0.01	0.001664	0.292845	0.562396	0.753744	1	0.006656	0.221298	0.356073	0.916805	0.996672	0.008319	0.141431	0.27787	0.420965	0.988353	0.613977	0.326667	0.004992	0.279534	0.514143	0.730449	0.998336	0.560732
0.399123	0.312865	0.288012	0.240117	0.199122	0.207906	0.004386	0.182749	0.394737	0.767544	0.998538	0.002924	0.288012	0.523392	0.755848	0.989766	0.001462	0.352339	0.542398	0.716374	1	0.577485	0.109649	0.312865	0.054173	0.083455	0.001464	0.001462	0.194444	0.428363	0.760234	1	0.00731	0.410819	0.498538	0.679825	0.973684	0.019006	0.374269	0.568713	0.748538	0.998538	0.409357	0.330893	0.008772	0.394737	0.559942	0.72076	0.994152	0.340643
0.316384	0.384181	0.299435	0.249292	0.192635	0.209632	0.022599	0.268362	0.502825	0.731638	0.99435	0.00565	0.189266	0.480226	0.779661	0.997175	0.002825	0.265537	0.516949	0.734463	1	0.491525	0.163842	0.344633	0.073654	0.050992	0.011331	0.002825	0.29661	0.573446	0.841808	1	0.09887	0.305085	0.514124	0.607345	0.988701	0.025424	0.180791	0.364407	0.686441	0.943503	0.50565	0.402266	0.022599	0.20339	0.403955	0.672316	0.988701	0.403955
0.375	0.359375	0.265625	0.285714	0.206349	0.222222	0.046875	0.25	0.5	0.8125	1	0.03125	0.109375	0.375	0.640625	0.9375	0.015625	0.3125	0.53125	0.71875	0.984375	0.71875	0.171875	0.109375	0.126984	0.063492	0	0.015625	0.234375	0.5625	0.734375	1	0.265625	0.28125	0.421875	0.53125	0.875	0.078125	0.078125	0.109375	0.78125	0.8125	0.28125	0.380952	0.265625	0.328125	0.53125	0.625	0.875	0.375
0.270142	0.407583	0.322275	0.190476	0.209524	0.271429	0.037915	0.208531	0.374408	0.691943	0.971564	0.009479	0.222749	0.526066	0.819905	1	0.004739	0.2891	0.49763	0.7109	0.943128	0.464455	0.374408	0.161137	0.128571	0.061905	0.004762	0.004739	0.265403	0.56872	0.78673	1	0.009479	0.28436	0.43128	0.611374	0.85782	0.07109	0.208531	0.64455	0.881517	0.990521	0.417062	0.428571	0.014218	0.279621	0.450237	0.677725	0.981043	0.42654
0.328767	0.394521	0.276712	0.252747	0.173077	0.17033	0.005479	0.219178	0.463014	0.726027	1	0.016438	0.252055	0.542466	0.805479	0.989041	0.00274	0.30137	0.479452	0.673973	0.994521	0.545205	0.189041	0.265753	0.07967	0.074176	0.002747	0.00274	0.249315	0.536986	0.772603	1	0.035616	0.391781	0.512329	0.641096	0.936986	0.005479	0.139726	0.276712	0.789041	0.917808	0.471233	0.368132	0.010959	0.345205	0.515068	0.715068	0.994521	0.405479
0.396117	0.378641	0.225243	0.287938	0.169261	0.182879	0.01165	0.314563	0.537864	0.776699	1	0.003883	0.24466	0.473786	0.700971	0.990291	0.001942	0.194175	0.421359	0.753398	0.992233	0.737864	0.102913	0.159223	0.038911	0.027237	0.007782	0.001942	0.357282	0.541748	0.726214	1	0.052427	0.159223	0.223301	0.291262	0.968932	0.009709	0.124272	0.174757	0.848544	0.91068	0.221359	0.206226	0.005825	0.11068	0.219417	0.718447	0.968932	0.392233
0.249012	0.442688	0.3083	0.206349	0.162698	0.261905	0.031621	0.256917	0.529644	0.758893	1	0.007905	0.213439	0.478261	0.774704	0.996047	0.003953	0.26087	0.474308	0.695652	0.988142	0.418972	0.189723	0.391304	0.055556	0.087302	0	0.003953	0.217391	0.537549	0.853755	1	0.142292	0.316206	0.395257	0.608696	0.70751	0.027668	0.205534	0.490119	0.790514	0.913043	0.525692	0.373016	0.043478	0.237154	0.442688	0.624506	0.988142	0.422925
0.400915	0.306402	0.292683	0.225954	0.206107	0.174046	0.009146	0.179878	0.448171	0.757622	1	0.003049	0.256098	0.47561	0.731707	0.993902	0.001524	0.342988	0.570122	0.76372	0.998476	0.286585	0.004573	0.708841	0.00458	0.117557	0.001527	0.001524	0.152439	0.484756	0.817073	1	0.02439	0.02439	0.02439	0.045732	0.047256	0.022866	0.286585	0.501524	0.731707	0.996951	0.507622	0.39084	0.006098	0.32622	0.525915	0.746951	0.996951	0.318598
0.460526	0.305921	0.233553	0.254125	0.207921	0.132013	0.016447	0.266447	0.460526	0.667763	0.993421	0.006579	0.223684	0.542763	0.776316	1	0.003289	0.203947	0.575658	0.773026	0.967105	0.361842	0.072368	0.565789	0.019802	0.079208	0.006601	0.003289	0.282895	0.5625	0.815789	1	0.565789	0.578947	0.684211	0.723684	0.8125	0.016447	0.217105	0.421053	0.667763	0.976974	0.378289	0.389439	0.023026	0.236842	0.625	0.759868	0.967105	0.315789
0.415929	0.19469	0.389381	0.116071	0.303571	0.169643	0.026549	0.185841	0.442478	0.752212	1	0.017699	0.221239	0.477876	0.654867	0.814159	0.00885	0.265487	0.566372	0.778761	0.955752	0.371681	0.221239	0.40708	0.107143	0.053571	0	0.00885	0.19469	0.353982	0.752212	1	0.035398	0.247788	0.362832	0.707965	0.831858	0.097345	0.442478	0.548673	0.876106	0.982301	0.469027	0.428571	0.035398	0.274336	0.477876	0.725664	0.955752	0.221239
0.349112	0.352663	0.298225	0.218009	0.204976	0.218009	0.007101	0.23432	0.433136	0.71716	1	0.002367	0.228402	0.491124	0.759763	0.99645	0.001183	0.293491	0.553846	0.757396	0.997633	0.512426	0.102959	0.384615	0.0391	0.074645	0.003555	0.001183	0.247337	0.376331	0.624852	1	0.033136	0.576331	0.700592	0.785799	0.99645	0.00355	0.182249	0.586982	0.804734	0.984615	0.459172	0.381517	0.005917	0.336095	0.583432	0.782249	0.995266	0.391716
0.33945	0.394495	0.266055	0.198157	0.239631	0.225806	0.022936	0.188073	0.522936	0.697248	1	0.009174	0.256881	0.568807	0.834862	0.995413	0.004587	0.229358	0.408257	0.642202	0.986239	0.481651	0.165138	0.353211	0.096774	0.087558	0.004608	0.004587	0.266055	0.59633	0.816514	1	0.215596	0.344037	0.412844	0.541284	0.922018	0.013761	0.12844	0.316514	0.738532	0.972477	0.522936	0.40553	0.013761	0.321101	0.610092	0.811927	0.986239	0.366972
0.405694	0.362989	0.231317	0.3	0.142857	0.192857	0.02847	0.217082	0.455516	0.686833	0.989324	0.010676	0.24911	0.494662	0.754448	0.978648	0.003559	0.256228	0.604982	0.800712	1	0.587189	0.124555	0.288256	0.057143	0.078571	0	0.003559	0.30605	0.47331	0.711744	1	0.007117	0.601423	0.697509	0.814947	0.978648	0.042705	0.11032	0.252669	0.654804	0.918149	0.320285	0.328571	0.007117	0.256228	0.654804	0.818505	0.992883	0.359431
0.331865	0.389134	0.279001	0.286765	0.170588	0.227941	0.002937	0.239354	0.516887	0.779736	1	0.005874	0.23348	0.496329	0.741557	0.995595	0.001468	0.28047	0.48605	0.718062	0.998532	0.421439	0.161527	0.417034	0.091176	0.073529	0.002941	0.001468	0.240822	0.509545	0.820852	1	0.0279	0.229075	0.402349	0.888399	0.997063	0.008811	0.277533	0.527166	0.671072	0.92511	0.528634	0.367647	0.017621	0.264317	0.461087	0.690162	0.998532	0.409692
0.350711	0.364929	0.28436	0.238095	0.261905	0.171429	0.009479	0.21327	0.445498	0.687204	1	0.037915	0.28436	0.56872	0.862559	0.985782	0.004739	0.251185	0.450237	0.677725	0.85782	0.445498	0.379147	0.175355	0.119048	0.071429	0.004762	0.004739	0.274882	0.601896	0.815166	1	0.014218	0.293839	0.436019	0.611374	0.853081	0.080569	0.218009	0.260664	0.748815	0.990521	0.421801	0.447619	0.018957	0.246445	0.436019	0.672986	0.943128	0.398104
0.367521	0.316239	0.316239	0.24339	0.232504	0.195179	0.002331	0.216006	0.483294	0.749029	0.993007	0.001554	0.227661	0.452991	0.71251	0.999223	0.000777	0.307692	0.556333	0.787102	1	0.477078	0.099456	0.423465	0.044323	0.081649	0.003888	0.000777	0.177933	0.401709	0.700078	1	0.027195	0.324786	0.540016	0.714064	0.995338	0.006216	0.346542	0.610723	0.836053	0.997669	0.503497	0.402799	0.003885	0.285936	0.531469	0.756022	0.998446	0.33411
0.364162	0.379576	0.256262	0.223938	0.179537	0.19305	0.003854	0.211946	0.358382	0.628131	1	0.011561	0.331407	0.570328	0.803468	0.998073	0.001927	0.294798	0.554913	0.77264	0.988439	0.412331	0.184971	0.402697	0.069498	0.050193	0	0.001927	0.325626	0.543353	0.7842	1	0.007707	0.462428	0.60501	0.894027	0.988439	0.026975	0.125241	0.265896	0.660886	0.961464	0.398844	0.355212	0.00578	0.304432	0.55684	0.77264	0.988439	0.38921
0.445545	0.237624	0.316832	0.22	0.3	0.12	0.019802	0.287129	0.49505	0.792079	0.990099	0.029703	0.19802	0.50495	0.752475	0.970297	0.009901	0.247525	0.455446	0.712871	1	0.405941	0.594059	0	0.2	0	0	0.009901	0.207921	0.50495	0.742574	1	0.029703	0.247525	0.445545	0.722772	0.990099	0	0	0	0	0	0.445545	0.32	0.049505	0.257426	0.455446	0.683168	0.930693	0.277228
0.389937	0.36478	0.245283	0.259494	0.132911	0.196203	0.018868	0.150943	0.396226	0.660377	0.987421	0.012579	0.257862	0.572327	0.779874	0.993711	0.006289	0.358491	0.591195	0.754717	1	0.402516	0.106918	0.490566	0.037975	0.088608	0	0.006289	0.119497	0.283019	0.72956	1	0.522013	0.540881	0.704403	0.823899	0.855346	0.044025	0.327044	0.459119	0.666667	0.962264	0.440252	0.329114	0.188679	0.433962	0.603774	0.754717	0.974843	0.396226
0.411765	0.309598	0.278638	0.26087	0.267081	0.167702	0.009288	0.244582	0.50774	0.798762	0.996904	0.006192	0.272446	0.473684	0.696594	0.96904	0.003096	0.232198	0.501548	0.721362	1	0.448916	0.151703	0.399381	0.055901	0.068323	0	0.003096	0.417957	0.640867	0.764706	1	0.099071	0.145511	0.393189	0.55418	0.869969	0.012384	0.20743	0.365325	0.795666	0.990712	0.396285	0.416149	0.021672	0.226006	0.408669	0.55418	0.98452	0.417957
0.330827	0.488722	0.180451	0.295455	0.121212	0.189394	0.022556	0.278195	0.496241	0.699248	1	0.015038	0.240602	0.518797	0.774436	0.977444	0.007519	0.233083	0.330827	0.654135	0.992481	0.368421	0.345865	0.285714	0.174242	0.05303	0.007576	0.007519	0.330827	0.533835	0.714286	1	0.172932	0.390977	0.586466	0.81203	0.992481	0.037594	0.097744	0.240602	0.308271	0.909774	0.473684	0.393939	0.030075	0.240602	0.556391	0.796992	0.992481	0.496241
0.362069	0.333333	0.304598	0.208092	0.236994	0.219653	0.011494	0.281609	0.505747	0.775862	1	0.017241	0.195402	0.494253	0.729885	0.982759	0.005747	0.212644	0.442529	0.655172	0.988506	0.494253	0.097701	0.408046	0.034682	0.080925	0	0.005747	0.304598	0.477011	0.758621	1	0.327586	0.643678	0.666667	0.804598	0.833333	0.045977	0.183908	0.408046	0.563218	0.982759	0.385057	0.404624	0.017241	0.247126	0.511494	0.712644	0.971264	0.258621
0.472727	0.276364	0.250909	0.244526	0.240876	0.156934	0.010909	0.272727	0.538182	0.792727	1	0.007273	0.243636	0.48	0.763636	0.992727	0.003636	0.225455	0.429091	0.64	0.967273	0.538182	0.127273	0.334545	0.058394	0.10219	0.007299	0.003636	0.221818	0.483636	0.770909	1	0.229091	0.345455	0.570909	0.64	0.767273	0.098182	0.2	0.530909	0.785455	0.989091	0.305455	0.313869	0.090909	0.221818	0.370909	0.592727	0.869091	0.305455
0.333333	0.303571	0.363095	0.191045	0.256716	0.235821	0.008929	0.264881	0.5	0.776786	0.991071	0.005952	0.241071	0.485119	0.744048	1	0.002976	0.232143	0.494048	0.705357	0.988095	0.458333	0.145833	0.395833	0.071642	0.065672	0	0.002976	0.270833	0.592262	0.782738	1	0.008929	0.235119	0.357143	0.6875	0.934524	0.044643	0.151786	0.473214	0.636905	0.991071	0.565476	0.346269	0.005952	0.247024	0.479167	0.705357	0.988095	0.318452
0.352941	0.333333	0.313725	0.230263	0.256579	0.243421	0.013072	0.254902	0.496732	0.751634	0.986928	0.03268	0.169935	0.339869	0.627451	0.993464	0.006536	0.359477	0.588235	0.79085	1	0.640523	0.176471	0.183007	0.052632	0.052632	0.013158	0.006536	0.169935	0.333333	0.575163	1	0.117647	0.503268	0.764706	0.810458	0.96732	0.019608	0.529412	0.633987	0.856209	0.901961	0.392157	0.394737	0.019608	0.267974	0.431373	0.718954	0.954248	0.339869
0.369748	0.302521	0.327731	0.211864	0.254237	0.177966	0.033613	0.252101	0.529412	0.689076	1	0.016807	0.201681	0.403361	0.705882	0.966387	0.008403	0.277311	0.554622	0.789916	0.983193	0.352941	0.151261	0.495798	0.042373	0.076271	0.008475	0.008403	0.084034	0.285714	0.420168	1	0.310924	0.336134	0.453782	0.756303	0.798319	0.109244	0.487395	0.613445	0.848739	0.983193	0.462185	0.355932	0.058824	0.361345	0.579832	0.764706	0.983193	0.294118
0.391685	0.40919	0.199125	0.313596	0.16886	0.125	0.010941	0.260394	0.424508	0.63895	0.997812	0.004376	0.33698	0.634573	0.798687	0.978118	0.002188	0.137856	0.310722	0.682713	1	0.689278	0.113786	0.196937	0.054825	0.050439	0.002193	0.002188	0.330416	0.59081	0.785558	1	0.159737	0.310722	0.654267	0.816193	0.989059	0.026258	0.080963	0.21663	0.391685	0.608315	0.396061	0.350877	0.008753	0.183807	0.63895	0.761488	0.989059	0.396061
0.364764	0.291563	0.343672	0.231056	0.265839	0.206211	0.008685	0.272953	0.524814	0.76799	0.996278	0.007444	0.229529	0.473945	0.738213	0.993797	0.001241	0.234491	0.490074	0.745658	1	0.483871	0.225806	0.290323	0.098137	0.053416	0.001242	0.001241	0.208437	0.452854	0.735732	1	0.004963	0.186104	0.431762	0.815136	0.96402	0.008685	0.333747	0.555831	0.709677	0.995037	0.575682	0.402484	0.002481	0.263027	0.48139	0.744417	0.996278	0.291563
0.307125	0.371007	0.321867	0.236453	0.197044	0.268473	0.012285	0.262899	0.461916	0.746929	0.997543	0.009828	0.211302	0.520885	0.744472	1	0.002457	0.260442	0.5086	0.734644	0.985258	0.331695	0.088452	0.579853	0.034483	0.1133	0.004926	0.002457	0.19656	0.366093	0.692875	1	0.063882	0.12285	0.206388	0.297297	0.363636	0.019656	0.410319	0.597052	0.786241	0.990172	0.550369	0.438424	0.007371	0.257985	0.454545	0.690418	0.987715	0.385749
0.307407	0.333333	0.359259	0.193309	0.230483	0.215613	0.007407	0.214815	0.47037	0.762963	0.996296	0.011111	0.225926	0.459259	0.714815	0.992593	0.003704	0.262963	0.514815	0.759259	1	0.511111	0.255556	0.233333	0.089219	0.05948	0	0.003704	0.207407	0.414815	0.722222	1	0.17037	0.27037	0.551852	0.774074	0.914815	0.051852	0.111111	0.5	0.82963	0.992593	0.537037	0.342007	0.014815	0.337037	0.548148	0.759259	0.985185	0.385185
0.286401	0.412088	0.301511	0.234364	0.172509	0.245361	0.001374	0.261676	0.476648	0.728709	0.991071	0.002747	0.233516	0.524038	0.761676	0.999313	0.000687	0.255495	0.503434	0.75206	1	0.570055	0.348901	0.081044	0.119588	0.024742	0.006873	0.000687	0.252747	0.485577	0.71978	1	0.008929	0.247253	0.510989	0.762363	0.995192	0.041896	0.181319	0.399038	0.93544	0.989011	0.60783	0.290034	0.00206	0.265797	0.527473	0.765797	0.998626	0.441621
0.387967	0.383817	0.228216	0.295218	0.168399	0.158004	0.008299	0.302905	0.502075	0.767635	1	0.012448	0.238589	0.491701	0.70332	0.993776	0.002075	0.190871	0.489627	0.742739	0.989627	0.709544	0.141079	0.149378	0.049896	0.04158	0	0.002075	0.33195	0.524896	0.711618	1	0.080913	0.195021	0.263485	0.753112	0.844398	0.016598	0.056017	0.510373	0.792531	0.960581	0.383817	0.282744	0.012448	0.192946	0.543568	0.871369	0.989627	0.383817
0.342045	0.409091	0.248864	0.262799	0.171786	0.188851	0.006818	0.228409	0.496591	0.767045	0.996591	0.002273	0.351136	0.544318	0.754545	1	0.001136	0.165909	0.385227	0.6875	0.998864	0.760227	0.063636	0.176136	0.031854	0.031854	0.002275	0.001136	0.3875	0.584091	0.792045	1	0.029545	0.138636	0.231818	0.648864	0.868182	0.009091	0.056818	0.163636	0.281818	0.994318	0.270455	0.304892	0.003409	0.122727	0.25	0.442045	0.995455	0.404545
0.27957	0.461022	0.259409	0.275908	0.164199	0.216689	0.00672	0.228495	0.452957	0.696237	1	0.002688	0.254032	0.52957	0.780914	0.987903	0.001344	0.262097	0.49328	0.715054	0.994624	0.747312	0.145161	0.107527	0.069987	0.026918	0	0.001344	0.252688	0.497312	0.748656	1	0.041667	0.27957	0.534946	0.790323	0.954301	0.020161	0.125	0.348118	0.569892	0.995968	0.610215	0.347241	0.014785	0.31586	0.611559	0.797043	0.994624	0.408602
0.371981	0.277778	0.350242	0.174334	0.268765	0.227603	0.007246	0.248792	0.504831	0.777778	1	0.004831	0.21256	0.495169	0.710145	0.997585	0.002415	0.253623	0.485507	0.7343	0.995169	0.342995	0.13285	0.524155	0.067797	0.11138	0.004843	0.002415	0.21256	0.543478	0.818841	1	0.086957	0.176329	0.516908	0.92029	0.997585	0.007246	0.26087	0.463768	0.71256	0.951691	0.572464	0.387409	0.014493	0.236715	0.454106	0.664251	0.995169	0.299517
0.271363	0.517939	0.210698	0.213446	0.106397	0.203003	0.001305	0.251794	0.478147	0.761252	0.998043	0.003262	0.223744	0.480757	0.690802	0.997391	0.000652	0.304631	0.581213	0.811481	1	0.560339	0.048271	0.391389	0.031984	0.069843	0.001958	0.000652	0.227658	0.40574	0.660144	1	0.014351	0.282453	0.531637	0.947815	0.998695	0.020874	0.393346	0.617091	0.804305	0.947162	0.630789	0.278068	0.001957	0.22244	0.493803	0.73516	0.998695	0.502283
0.291762	0.429062	0.279176	0.262314	0.167239	0.239404	0.005721	0.24714	0.528604	0.772311	1	0.002288	0.273455	0.491991	0.749428	0.997712	0.001144	0.226545	0.482838	0.696796	0.998856	0.575515	0.114416	0.310069	0.04811	0.064147	0.004582	0.001144	0.265446	0.52746	0.757437	1	0.004577	0.138444	0.41762	0.59611	0.966819	0.049199	0.215103	0.5	0.726545	0.997712	0.456522	0.318442	0.004577	0.243707	0.5	0.718535	0.998856	0.467963
0.323944	0.341549	0.334507	0.183746	0.222615	0.268551	0.010563	0.34507	0.542254	0.795775	1	0.007042	0.190141	0.380282	0.679577	0.989437	0.003521	0.214789	0.528169	0.753521	0.996479	0.475352	0.179577	0.34507	0.056537	0.070671	0.007067	0.003521	0.302817	0.59507	0.84507	1	0.010563	0.070423	0.228873	0.56338	0.883803	0.098592	0.278169	0.454225	0.725352	0.975352	0.507042	0.438163	0.014085	0.207746	0.433099	0.683099	0.985915	0.352113
0.352723	0.30198	0.345297	0.206939	0.262701	0.221809	0.002475	0.263614	0.537129	0.758663	1	0.00495	0.257426	0.466584	0.722772	0.99505	0.001238	0.232673	0.49505	0.757426	0.998762	0.469059	0.243812	0.287129	0.094176	0.052045	0.002478	0.001238	0.231436	0.486386	0.752475	1	0.039604	0.201733	0.418317	0.74505	0.962871	0.006188	0.315594	0.538366	0.701733	0.992574	0.575495	0.406444	0.003713	0.256188	0.470297	0.737624	0.998762	0.310644
0.294404	0.389294	0.316302	0.209756	0.185366	0.24878	0.009732	0.182482	0.440389	0.705596	0.995134	0.007299	0.26764	0.515815	0.768856	0.997567	0.002433	0.248175	0.513382	0.781022	1	0.547445	0.184915	0.26764	0.063415	0.058537	0	0.002433	0.23601	0.540146	0.746959	1	0.082725	0.22871	0.403893	0.579075	0.885645	0.043796	0.277372	0.549878	0.79562	0.987835	0.532847	0.4	0.012165	0.291971	0.586375	0.798054	0.992701	0.386861
0.358974	0.333333	0.307692	0.267241	0.189655	0.198276	0.042735	0.188034	0.57265	0.794872	1	0.025641	0.299145	0.521368	0.752137	0.982906	0.008547	0.17094	0.393162	0.692308	0.965812	0.444444	0.230769	0.324786	0.103448	0.068966	0	0.008547	0.213675	0.521368	0.649573	1	0.17094	0.25641	0.350427	0.42735	0.564103	0.051282	0.119658	0.735043	0.846154	0.965812	0.410256	0.448276	0.034188	0.25641	0.478632	0.74359	0.965812	0.358974
0.393665	0.321267	0.285068	0.222727	0.245455	0.195455	0.022624	0.244344	0.556561	0.846154	1	0.00905	0.180995	0.506787	0.733032	0.963801	0.004525	0.230769	0.41629	0.647059	0.927602	0.443439	0.334842	0.221719	0.113636	0.068182	0.013636	0.004525	0.262443	0.61991	0.81448	1	0.036199	0.312217	0.447964	0.588235	0.923077	0.013575	0.095023	0.244344	0.850679	0.963801	0.384615	0.4	0.0181	0.235294	0.41629	0.624434	0.923077	0.366516
0.346883	0.298103	0.355014	0.195652	0.282609	0.206522	0.02981	0.243902	0.533875	0.791328	0.99729	0.00542	0.257453	0.452575	0.728997	0.98645	0.00271	0.230352	0.517615	0.750678	1	0.368564	0.214092	0.417344	0.076087	0.081522	0	0.00271	0.284553	0.479675	0.804878	1	0.01084	0.186992	0.382114	0.528455	0.99187	0.04878	0.243902	0.590786	0.775068	0.98374	0.604336	0.413043	0.01084	0.271003	0.495935	0.734417	0.99458	0.306233
0.405303	0.367424	0.227273	0.288973	0.18251	0.171103	0.011364	0.291667	0.503788	0.772727	0.996212	0.007576	0.234848	0.560606	0.806818	1	0.003788	0.17803	0.382576	0.575758	0.901515	0.640152	0.121212	0.238636	0.038023	0.053232	0.007605	0.003788	0.227273	0.617424	0.837121	1	0.079545	0.375	0.431818	0.541667	0.666667	0.007576	0.284091	0.344697	0.575758	0.734848	0.439394	0.34981	0.015152	0.185606	0.435606	0.651515	0.992424	0.397727
0.320495	0.352132	0.327373	0.199587	0.199587	0.251204	0.004127	0.275791	0.503439	0.748281	0.996561	0.001376	0.247593	0.5	0.746905	1	0.000688	0.227648	0.490371	0.755158	0.998624	0.536451	0.370702	0.092847	0.123882	0.033035	0.009635	0.000688	0.269601	0.502063	0.727648	1	0.002063	0.194635	0.428473	0.742779	0.935351	0.083906	0.457359	0.693948	0.957359	0.998624	0.600413	0.308328	0.001376	0.242091	0.482118	0.759285	0.997937	0.369326
0.311248	0.436055	0.252696	0.226852	0.158951	0.231481	0.009245	0.249615	0.497689	0.742681	0.998459	0.003082	0.275809	0.530046	0.762712	1	0.001541	0.215716	0.454545	0.708783	0.989214	0.734977	0.104777	0.160247	0.046296	0.052469	0.003086	0.001541	0.300462	0.531587	0.745763	1	0.006163	0.228043	0.545455	0.864407	0.959938	0.01849	0.171032	0.337442	0.493066	0.924499	0.429892	0.330247	0.006163	0.223421	0.53775	0.781202	0.992296	0.428351
0.294393	0.364486	0.341121	0.215962	0.201878	0.215962	0.023364	0.275701	0.495327	0.761682	1	0.009346	0.233645	0.415888	0.654206	0.953271	0.004673	0.196262	0.565421	0.82243	0.995327	0.537383	0.140187	0.32243	0.065728	0.065728	0	0.004673	0.261682	0.397196	0.64486	1	0.018692	0.046729	0.598131	0.752336	0.934579	0.11215	0.214953	0.565421	0.799065	0.990654	0.514019	0.356808	0.018692	0.317757	0.523364	0.757009	0.990654	0.364486
0.307692	0.418269	0.274038	0.270531	0.130435	0.270531	0.028846	0.322115	0.543269	0.850962	1	0.009615	0.192308	0.418269	0.716346	0.990385	0.004808	0.240385	0.471154	0.682692	0.985577	0.514423	0.129808	0.355769	0.048309	0.10628	0	0.004808	0.173077	0.413462	0.860577	1	0.389423	0.427885	0.466346	0.668269	0.701923	0.019231	0.235577	0.596154	0.764423	0.956731	0.432692	0.347826	0.019231	0.399038	0.596154	0.735577	0.956731	0.403846
0.243816	0.498233	0.257951	0.216312	0.131206	0.262411	0.007067	0.212014	0.342756	0.650177	0.975265	0.010601	0.289753	0.54417	0.756184	1	0.003534	0.226148	0.508834	0.763251	0.992933	0.798587	0.120141	0.081272	0.056738	0.021277	0	0.003534	0.332155	0.55477	0.759717	1	0.120141	0.219081	0.279152	0.611307	0.992933	0.162544	0.176678	0.293286	0.314488	0.904594	0.572438	0.297872	0.021201	0.318021	0.55477	0.713781	0.992933	0.44523
0.427123	0.328264	0.244613	0.269036	0.168782	0.170051	0.010139	0.188847	0.564005	0.81749	1	0.002535	0.237009	0.47782	0.716096	0.996198	0.001267	0.30545	0.453739	0.65019	0.988593	0.528517	0.105196	0.366286	0.040609	0.098985	0.005076	0.001267	0.157161	0.466413	0.813688	1	0.007605	0.343473	0.471483	0.590621	0.752852	0.021546	0.328264	0.543726	0.727503	0.975919	0.387833	0.294416	0.003802	0.304183	0.448669	0.619772	0.993663	0.380228
0.428899	0.376147	0.194954	0.289655	0.195402	0.142529	0.011468	0.316514	0.582569	0.81422	1	0.004587	0.213303	0.465596	0.694954	0.995413	0.002294	0.21789	0.369266	0.619266	0.993119	0.798165	0.084862	0.116972	0.034483	0.057471	0.006897	0.002294	0.224771	0.516055	0.729358	1	0.018349	0.305046	0.401376	0.598624	0.993119	0.029817	0.272936	0.369266	0.87844	0.951835	0.380734	0.372414	0.018349	0.18578	0.348624	0.571101	0.993119	0.451835
0.356522	0.352174	0.291304	0.231441	0.218341	0.20524	0.008696	0.195652	0.53913	0.730435	1	0.03913	0.273913	0.426087	0.743478	0.986957	0.004348	0.282609	0.517391	0.76087	0.991304	0.434783	0.282609	0.282609	0.087336	0.061135	0.008734	0.004348	0.234783	0.430435	0.678261	1	0.013043	0.213043	0.547826	0.76087	0.978261	0.091304	0.286957	0.508696	0.721739	0.873913	0.6	0.384279	0.021739	0.282609	0.486957	0.708696	0.978261	0.334783
0.372093	0.348837	0.27907	0.242991	0.172897	0.196262	0.013953	0.27907	0.534884	0.72093	1	0.009302	0.195349	0.35814	0.655814	0.990698	0.004651	0.353488	0.604651	0.818605	0.972093	0.525581	0.148837	0.325581	0.102804	0.065421	0	0.004651	0.265116	0.395349	0.646512	1	0.018605	0.074419	0.576744	0.748837	0.930233	0.097674	0.190698	0.548837	0.795349	0.986047	0.497674	0.345794	0.018605	0.32093	0.506977	0.75814	0.986047	0.32093
0.302752	0.426606	0.270642	0.225806	0.179724	0.207373	0.009174	0.169725	0.449541	0.747706	0.958716	0.018349	0.238532	0.444954	0.711009	0.995413	0.004587	0.334862	0.56422	0.793578	1	0.582569	0.256881	0.16055	0.078341	0.032258	0.004608	0.004587	0.233945	0.440367	0.738532	1	0.266055	0.472477	0.573394	0.83945	0.940367	0.12844	0.16055	0.201835	0.637615	0.889908	0.46789	0.35023	0.142202	0.330275	0.573394	0.770642	0.990826	0.444954
0.213518	0.572965	0.213518	0.216923	0.103077	0.224615	0.010753	0.278034	0.460829	0.691244	0.990783	0.003072	0.204301	0.517665	0.752688	1	0.001536	0.310292	0.519201	0.803379	0.998464	0.726575	0.105991	0.167435	0.047692	0.032308	0.007692	0.001536	0.218126	0.579109	0.761905	1	0.225806	0.34255	0.44086	0.921659	0.996928	0.059908	0.248848	0.371736	0.511521	0.990783	0.572965	0.323077	0.00768	0.325653	0.56682	0.738863	0.998464	0.62212
0.331742	0.272076	0.396181	0.141148	0.26555	0.246411	0.004773	0.243437	0.472554	0.761337	0.99284	0.009547	0.188544	0.455847	0.725537	0.988067	0.002387	0.286396	0.544153	0.747017	1	0.348449	0.088305	0.563246	0.038278	0.105263	0.004785	0.002387	0.188544	0.477327	0.656325	1	0.004773	0.062053	0.138425	0.224344	0.293556	0.019093	0.381862	0.577566	0.799523	0.995227	0.601432	0.37799	0.00716	0.257757	0.48926	0.73031	0.997613	0.26969
0.365546	0.323529	0.310924	0.227848	0.223629	0.244726	0.008403	0.210084	0.462185	0.773109	1	0.021008	0.260504	0.487395	0.747899	0.991597	0.004202	0.252101	0.508403	0.722689	0.987395	0.420168	0.168067	0.411765	0.075949	0.059072	0	0.004202	0.344538	0.554622	0.710084	1	0.205882	0.352941	0.453782	0.647059	0.739496	0.029412	0.12605	0.466387	0.815126	0.983193	0.470588	0.455696	0.029412	0.285714	0.512605	0.714286	0.966387	0.323529
0.307359	0.385281	0.307359	0.234783	0.213043	0.226087	0.008658	0.268398	0.493506	0.722944	1	0.012987	0.21645	0.47619	0.800866	0.987013	0.004329	0.229437	0.489177	0.69697	0.995671	0.337662	0.095238	0.5671	0.034783	0.104348	0	0.004329	0.116883	0.406926	0.692641	1	0.398268	0.78355	0.835498	0.857143	0.891775	0.051948	0.272727	0.467532	0.614719	0.978355	0.493506	0.330435	0.025974	0.21645	0.47619	0.688312	0.991342	0.385281
0.313316	0.441253	0.245431	0.244444	0.154248	0.215686	0.003916	0.201044	0.385117	0.651436	1	0.002611	0.308094	0.552219	0.805483	0.997389	0.001305	0.259791	0.549608	0.711488	0.989556	0.672324	0.122715	0.204961	0.060131	0.049673	0.007843	0.001305	0.234987	0.47389	0.780679	1	0.020888	0.437337	0.579634	0.677546	0.964752	0.018277	0.244125	0.422977	0.685379	0.920366	0.458225	0.360784	0.007833	0.362924	0.584856	0.800261	0.993473	0.432115
0.319392	0.319392	0.361217	0.183206	0.248092	0.236641	0.007605	0.258555	0.520913	0.78327	1	0.011407	0.212928	0.441065	0.730038	0.992395	0.003802	0.26616	0.490494	0.722433	0.980989	0.368821	0.18251	0.448669	0.053435	0.091603	0	0.003802	0.159696	0.406844	0.669202	1	0.13308	0.30038	0.395437	0.608365	0.703422	0.030418	0.26616	0.520913	0.825095	0.988593	0.562738	0.412214	0.015209	0.235741	0.467681	0.673004	0.980989	0.323194
0.269355	0.485484	0.245161	0.26979	0.135703	0.263328	0.009677	0.224194	0.493548	0.746774	1	0.003226	0.279032	0.506452	0.756452	0.998387	0.001613	0.203226	0.483871	0.724194	0.995161	0.670968	0.082258	0.246774	0.029079	0.048465	0.003231	0.001613	0.359677	0.541935	0.790323	1	0.1	0.654839	0.717742	0.795161	0.859677	0.003226	0.072581	0.180645	0.333871	0.877419	0.446774	0.390953	0.004839	0.235484	0.559677	0.785484	0.987097	0.495161
0.358779	0.305344	0.335878	0.223077	0.238462	0.246154	0.076336	0.335878	0.519084	0.778626	0.938931	0.022901	0.19084	0.412214	0.755725	1	0.007634	0.21374	0.442748	0.687023	0.992366	0.458015	0.137405	0.40458	0.046154	0.092308	0	0.007634	0.19084	0.351145	0.748092	1	0.259542	0.282443	0.381679	0.412214	0.694656	0.076336	0.465649	0.564885	0.78626	0.89313	0.419847	0.323077	0.053435	0.29771	0.503817	0.679389	0.954198	0.274809
0.405263	0.289474	0.305263	0.242744	0.229551	0.189974	0.013158	0.242105	0.510526	0.789474	1	0.005263	0.268421	0.526316	0.768421	0.997368	0.002632	0.231579	0.447368	0.655263	0.978947	0.439474	0.134211	0.426316	0.047493	0.079156	0.005277	0.002632	0.336842	0.584211	0.831579	1	0.15	0.289474	0.378947	0.568421	0.660526	0.007895	0.121053	0.413158	0.707895	0.992105	0.5	0.343008	0.015789	0.221053	0.439474	0.636842	0.978947	0.328947
0.393443	0.352459	0.254098	0.280992	0.22314	0.165289	0.016393	0.245902	0.491803	0.811475	1	0.02459	0.262295	0.5	0.745902	0.991803	0.008197	0.188525	0.352459	0.639344	0.95082	0.5	0.5	0	0.198347	0	0	0.008197	0.327869	0.508197	0.803279	1	0.02459	0.204918	0.368852	0.639344	0.942623	0	0	0	0	0	0.409836	0.347107	0.032787	0.221311	0.516393	0.631148	0.95082	0.368852
0.408616	0.287206	0.304178	0.206536	0.257516	0.151634	0.003916	0.206266	0.44517	0.712794	1	0.016971	0.25718	0.493473	0.776762	0.994778	0.001305	0.304178	0.549608	0.746736	0.997389	0.314621	0.056136	0.629243	0.019608	0.103268	0.006536	0.001305	0.165796	0.315927	0.72846	1	0.005222	0.10705	0.139687	0.219321	0.875979	0.02611	0.368146	0.575718	0.772846	0.992167	0.456919	0.381699	0.022193	0.399478	0.58094	0.775457	0.997389	0.313316
0.315011	0.422833	0.262156	0.269068	0.152542	0.252119	0.014799	0.160677	0.418605	0.687104	1	0.004228	0.287526	0.54334	0.805497	0.995772	0.002114	0.293869	0.545455	0.729387	0.991543	0.632135	0.164905	0.20296	0.055085	0.038136	0	0.002114	0.188161	0.526427	0.841438	1	0.065539	0.289641	0.458774	0.649049	0.786469	0.084567	0.312896	0.51797	0.682875	0.82241	0.450317	0.322034	0.021142	0.319239	0.556025	0.818182	0.97463	0.427061
0.300781	0.355469	0.34375	0.203922	0.211765	0.254902	0.007812	0.226562	0.507812	0.773438	0.988281	0.011719	0.273438	0.519531	0.710938	1	0.003906	0.234375	0.453125	0.71875	0.992188	0.398438	0.1875	0.414062	0.054902	0.078431	0	0.003906	0.222656	0.519531	0.714844	1	0.113281	0.300781	0.378906	0.597656	0.695312	0.011719	0.242188	0.496094	0.8125	0.992188	0.550781	0.4	0.019531	0.222656	0.464844	0.664062	0.992188	0.390625
0.402571	0.329499	0.26793	0.232905	0.182126	0.181449	0.003383	0.274019	0.560893	0.81935	1	0.002706	0.284844	0.521651	0.759134	0.999323	0.000677	0.185386	0.384303	0.594723	0.983085	0.441137	0.02977	0.529093	0.010833	0.102911	0.005416	0.000677	0.34912	0.728687	0.854533	1	0.021651	0.093369	0.432341	0.520298	0.650203	0.003383	0.227334	0.402571	0.613667	0.99797	0.412043	0.291131	0.00203	0.186062	0.370771	0.564276	0.972936	0.343708
0.328877	0.377005	0.294118	0.241287	0.184987	0.252011	0.005348	0.221925	0.508021	0.778075	1	0.010695	0.259358	0.513369	0.737968	0.991979	0.002674	0.262032	0.462567	0.695187	0.994652	0.524064	0.259358	0.216578	0.096515	0.053619	0.010724	0.002674	0.221925	0.435829	0.729947	1	0.072193	0.307487	0.526738	0.663102	0.997326	0.093583	0.165775	0.483957	0.874332	0.938503	0.497326	0.380697	0.010695	0.315508	0.513369	0.705882	0.994652	0.398396
0.304239	0.448878	0.246883	0.2275	0.1525	0.2275	0.007481	0.304239	0.551122	0.775561	0.997506	0.009975	0.206983	0.438903	0.683292	0.985037	0.002494	0.244389	0.526185	0.795511	1	0.551122	0.084788	0.36409	0.055	0.075	0.01	0.002494	0.184539	0.531172	0.733167	1	0.029925	0.077307	0.798005	0.860349	0.937656	0.054863	0.289277	0.389027	0.665835	0.992519	0.553616	0.34	0.014963	0.256858	0.53616	0.700748	0.985037	0.428928
0.384106	0.337748	0.278146	0.246667	0.226667	0.193333	0.02649	0.192053	0.443709	0.649007	1	0.019868	0.225166	0.556291	0.81457	0.986755	0.006623	0.284768	0.569536	0.735099	0.993377	0.496689	0.165563	0.337748	0.093333	0.08	0	0.006623	0.278146	0.615894	0.860927	1	0.019868	0.543046	0.655629	0.715232	0.980132	0.059603	0.13245	0.331126	0.450331	0.774834	0.470199	0.36	0.059603	0.357616	0.596026	0.748344	0.980132	0.278146
0.475309	0.345679	0.179012	0.343653	0.126935	0.145511	0.009259	0.209877	0.435185	0.746914	0.966049	0.006173	0.314815	0.555556	0.771605	0.993827	0.003086	0.354938	0.478395	0.694444	1	0.506173	0.092593	0.401235	0.043344	0.080495	0.006192	0.003086	0.228395	0.41358	0.694444	1	0.012346	0.083333	0.395062	0.484568	0.932099	0.015432	0.367284	0.611111	0.762346	0.987654	0.287037	0.278638	0.012346	0.410494	0.574074	0.712963	0.987654	0.37963
0.33564	0.422145	0.242215	0.260417	0.163194	0.215278	0.010381	0.269896	0.463668	0.747405	0.979239	0.00692	0.221453	0.543253	0.820069	1	0.00346	0.242215	0.487889	0.67474	0.989619	0.519031	0.190311	0.290657	0.083333	0.055556	0	0.00346	0.214533	0.543253	0.844291	1	0.013841	0.16263	0.346021	0.643599	0.99308	0.107266	0.304498	0.508651	0.712803	0.816609	0.449827	0.354167	0.017301	0.259516	0.574394	0.747405	0.989619	0.453287
0.259542	0.381679	0.358779	0.215385	0.215385	0.284615	0.022901	0.167939	0.412214	0.618321	0.954198	0.015267	0.274809	0.610687	0.80916	1	0.007634	0.244275	0.465649	0.732824	0.992366	0.381679	0.343511	0.274809	0.176923	0.053846	0.007692	0.007634	0.328244	0.549618	0.717557	1	0.175573	0.381679	0.580153	0.80916	0.992366	0.038168	0.099237	0.251908	0.687023	0.916031	0.48855	0.430769	0.030534	0.267176	0.580153	0.78626	0.992366	0.335878
0.39521	0.275449	0.329341	0.210843	0.301205	0.210843	0.017964	0.245509	0.54491	0.826347	1	0.011976	0.203593	0.491018	0.706587	0.922156	0.005988	0.215569	0.461078	0.712575	0.988024	0.365269	0.191617	0.443114	0.060241	0.084337	0	0.005988	0.131737	0.371257	0.664671	1	0.023952	0.305389	0.353293	0.556886	0.820359	0.137725	0.437126	0.658683	0.850299	0.988024	0.407186	0.481928	0.02994	0.239521	0.461078	0.736527	0.988024	0.311377
0.413665	0.335404	0.250932	0.247512	0.18408	0.177861	0.004969	0.204969	0.490683	0.715528	1	0.002484	0.264596	0.493168	0.762733	0.996273	0.001242	0.309317	0.546584	0.744099	0.997516	0.565217	0.122981	0.311801	0.044776	0.069652	0.004975	0.001242	0.160248	0.356522	0.715528	1	0.032298	0.424845	0.614907	0.745342	0.991304	0.045963	0.382609	0.583851	0.802484	0.980124	0.419876	0.318408	0.040994	0.326708	0.50559	0.744099	0.997516	0.385093
0.361039	0.47013	0.168831	0.302083	0.125	0.127604	0.007792	0.212987	0.425974	0.690909	0.997403	0.005195	0.348052	0.633766	0.802597	1	0.002597	0.145455	0.34026	0.467532	0.981818	0.716883	0.155844	0.127273	0.059896	0.033854	0.002604	0.002597	0.387013	0.641558	0.820779	1	0.064935	0.168831	0.254545	0.405195	0.490909	0.054545	0.114286	0.27013	0.355844	0.509091	0.654545	0.197917	0.062338	0.412987	0.65974	0.823377	0.994805	0.496104
0.357895	0.315789	0.326316	0.276596	0.180851	0.191489	0.031579	0.221053	0.473684	0.747368	1	0.042105	0.136842	0.4	0.642105	0.989474	0.010526	0.326316	0.547368	0.831579	0.968421	0.6	0.031579	0.368421	0.042553	0.085106	0	0.010526	0.221053	0.368421	0.631579	1	0.421053	0.421053	0.421053	0.431579	0.621053	0.136842	0.484211	0.736842	0.831579	0.936842	0.347368	0.382979	0.157895	0.473684	0.631579	0.831579	0.957895	0.336842
0.4	0.27907	0.32093	0.214953	0.247664	0.205607	0.023256	0.260465	0.539535	0.813953	1	0.013953	0.209302	0.460465	0.702326	0.948837	0.004651	0.251163	0.497674	0.711628	0.962791	0.446512	0.386047	0.167442	0.135514	0.060748	0.004673	0.004651	0.311628	0.6	0.813953	1	0.009302	0.27907	0.446512	0.623256	0.962791	0.069767	0.204651	0.246512	0.753488	0.930233	0.44186	0.392523	0.009302	0.232558	0.44186	0.67907	0.962791	0.297674
0.338942	0.334135	0.326923	0.231325	0.243373	0.255422	0.007212	0.269231	0.5	0.740385	1	0.014423	0.216346	0.463942	0.745192	0.997596	0.002404	0.252404	0.524038	0.752404	0.995192	0.370192	0.141827	0.487981	0.062651	0.096386	0.004819	0.002404	0.242788	0.557692	0.807692	1	0.112981	0.204327	0.564904	0.915865	0.997596	0.004808	0.257212	0.449519	0.716346	0.954327	0.574519	0.375904	0.012019	0.223558	0.480769	0.6875	0.995192	0.367788
0.431818	0.272727	0.295455	0.172414	0.252874	0.195402	0.045455	0.215909	0.511364	0.715909	1	0.034091	0.25	0.465909	0.761364	0.897727	0.011364	0.159091	0.454545	0.738636	0.977273	0.261364	0	0.738636	0	0.091954	0	0.011364	0.170455	0.238636	0.545455	1	0	0	0	0	0	0.045455	0.329545	0.568182	0.75	0.954545	0.386364	0.413793	0.079545	0.306818	0.477273	0.704545	0.954545	0.25
0.288413	0.394207	0.31738	0.213115	0.17024	0.282472	0.002519	0.29597	0.559194	0.787154	0.998741	0.005038	0.244332	0.482368	0.72796	1	0.001259	0.230479	0.474811	0.739295	0.997481	0.459698	0.244332	0.29597	0.099622	0.054224	0.003783	0.001259	0.209068	0.462217	0.746851	1	0.039043	0.206549	0.423174	0.788413	0.955919	0.006297	0.324937	0.575567	0.700252	0.988665	0.56801	0.398487	0.003778	0.260705	0.478589	0.734257	0.997481	0.384131
0.396694	0.272727	0.330579	0.15	0.258333	0.216667	0.041322	0.256198	0.471074	0.694215	1	0.016529	0.347107	0.495868	0.801653	0.975207	0.008264	0.181818	0.429752	0.710744	0.983471	0.38843	0.272727	0.338843	0.1	0.083333	0.016667	0.008264	0.289256	0.471074	0.818182	1	0.033058	0.297521	0.421488	0.53719	0.975207	0.132231	0.206612	0.578512	0.68595	0.892562	0.446281	0.416667	0.033058	0.214876	0.487603	0.669421	0.966942	0.297521
0.438017	0.280992	0.280992	0.283333	0.233333	0.133333	0.016529	0.239669	0.504132	0.694215	0.991736	0.024793	0.231405	0.454545	0.809917	0.975207	0.008264	0.190083	0.53719	0.710744	1	0.429752	0.157025	0.413223	0.041667	0.075	0.008333	0.008264	0.190083	0.355372	0.768595	1	0.256198	0.280992	0.38843	0.429752	0.735537	0.066116	0.446281	0.570248	0.801653	0.909091	0.454545	0.366667	0.041322	0.305785	0.528926	0.719008	0.966942	0.322314
0.463158	0.305263	0.231579	0.287234	0.212766	0.138298	0.031579	0.178947	0.421053	0.631579	1	0.021053	0.4	0.642105	0.810526	0.989474	0.010526	0.252632	0.463158	0.694737	0.926316	0.2	0.010526	0.789474	0.021277	0.06383	0	0.010526	0.431579	0.694737	0.947368	1	0.705263	0.705263	0.705263	0.705263	0.705263	0.042105	0.221053	0.421053	0.652632	0.926316	0.273684	0.382979	0.042105	0.336842	0.568421	0.694737	0.926316	0.336842
0.362654	0.328704	0.308642	0.210201	0.22102	0.225657	0.00463	0.185185	0.496914	0.771605	1	0.003086	0.237654	0.481481	0.725309	0.986111	0.001543	0.285494	0.507716	0.757716	0.992284	0.442901	0.143519	0.41358	0.054096	0.081917	0.004637	0.001543	0.148148	0.408951	0.720679	1	0.057099	0.347222	0.513889	0.641975	0.760802	0.006173	0.316358	0.584877	0.82716	0.996914	0.540123	0.361669	0.007716	0.276235	0.481481	0.71142	0.992284	0.334877
0.394366	0.29108	0.314554	0.264151	0.287736	0.169811	0.00939	0.276995	0.549296	0.798122	1	0.014085	0.225352	0.431925	0.70892	0.981221	0.004695	0.253521	0.502347	0.704225	0.995305	0.492958	0.244131	0.262911	0.09434	0.066038	0	0.004695	0.220657	0.469484	0.694836	1	0.046948	0.201878	0.394366	0.652582	0.849765	0.103286	0.305164	0.596244	0.892019	0.957746	0.403756	0.349057	0.042254	0.239437	0.511737	0.704225	0.99061	0.295775
0.290123	0.391975	0.317901	0.232198	0.167183	0.26935	0.018519	0.283951	0.496914	0.768519	1	0.006173	0.219136	0.521605	0.697531	0.996914	0.003086	0.246914	0.45679	0.771605	0.993827	0.623457	0.296296	0.080247	0.092879	0.037152	0	0.003086	0.225309	0.549383	0.740741	1	0.111111	0.299383	0.481481	0.756173	0.919753	0.018519	0.033951	0.058642	0.447531	0.966049	0.604938	0.28483	0.012346	0.194444	0.475309	0.712963	0.993827	0.429012
0.36831	0.307746	0.323944	0.212121	0.230444	0.206483	0.001408	0.234507	0.45	0.734507	0.999296	0.002113	0.273944	0.529577	0.748592	0.997183	0.000704	0.247183	0.505634	0.764789	1	0.538732	0.35493	0.106338	0.11346	0.03876	0.007752	0.000704	0.249296	0.502817	0.716901	1	0.009155	0.232394	0.467606	0.740141	0.933099	0.002113	0.25	0.673239	0.95493	0.998592	0.585915	0.283298	0.002113	0.25493	0.494366	0.761972	0.997887	0.347183
0.351906	0.430108	0.217986	0.273973	0.144814	0.196673	0.00391	0.26784	0.491691	0.769306	0.997067	0.001955	0.244379	0.504399	0.740958	1	0.000978	0.230694	0.486804	0.737048	0.999022	0.69697	0.063539	0.239492	0.029354	0.056751	0.001957	0.000978	0.246334	0.499511	0.721408	1	0.061584	0.384164	0.57869	0.907136	0.979472	0.006843	0.213099	0.435973	0.750733	0.998045	0.312805	0.348337	0.005865	0.220919	0.496579	0.753666	0.99609	0.484848
0.356828	0.330396	0.312775	0.256637	0.212389	0.212389	0.008811	0.202643	0.488987	0.726872	0.991189	0.013216	0.255507	0.54185	0.770925	0.977974	0.004405	0.246696	0.440529	0.678414	1	0.30837	0.101322	0.590308	0.035398	0.115044	0	0.004405	0.14978	0.431718	0.757709	1	0.440529	0.788546	0.845815	0.881057	0.907489	0.017621	0.255507	0.46696	0.629956	0.982379	0.502203	0.353982	0.017621	0.22467	0.431718	0.625551	0.986784	0.295154
0.37931	0.352087	0.268603	0.285455	0.198182	0.183636	0.00726	0.255898	0.537205	0.749546	0.994555	0.00363	0.232305	0.408348	0.709619	0.998185	0.001815	0.248639	0.53539	0.767695	1	0.540835	0.14882	0.310345	0.061818	0.065455	0.003636	0.001815	0.252269	0.439201	0.747731	1	0.041742	0.23775	0.491833	0.588022	0.807623	0.018149	0.274047	0.640653	0.833031	0.978221	0.459165	0.338182	0.010889	0.283122	0.586207	0.780399	0.983666	0.37931
0.453228	0.305665	0.241107	0.271768	0.224274	0.156992	0.013175	0.283267	0.474308	0.768116	0.998682	0.002635	0.26087	0.524374	0.783926	1	0.001318	0.188406	0.482213	0.699605	0.997365	0.513834	0.171278	0.314888	0.064644	0.077836	0.001319	0.001318	0.251647	0.549407	0.83004	1	0.006588	0.189723	0.382082	0.545455	0.747036	0.022398	0.272727	0.517787	0.732543	0.976285	0.345191	0.290237	0.00527	0.201581	0.399209	0.636364	0.997365	0.350461
0.333938	0.402904	0.263158	0.250909	0.158182	0.229091	0.012704	0.212341	0.508167	0.818512	1	0.00363	0.205082	0.442831	0.716878	0.99637	0.001815	0.321234	0.513612	0.718693	0.970962	0.502722	0.136116	0.361162	0.049091	0.074545	0.005455	0.001815	0.127042	0.366606	0.744102	1	0.168784	0.411978	0.560799	0.720508	0.811252	0.110708	0.346642	0.540835	0.814882	0.958258	0.473684	0.330909	0.005445	0.297641	0.470054	0.693285	0.990926	0.444646
0.369845	0.291237	0.338918	0.193548	0.254194	0.216774	0.002577	0.271907	0.53866	0.759021	1	0.007732	0.194588	0.444588	0.735825	0.996134	0.001289	0.247423	0.507732	0.734536	0.998711	0.440722	0.155928	0.403351	0.08	0.064516	0.002581	0.001289	0.289948	0.481959	0.78866	1	0.002577	0.194588	0.375	0.903351	0.997423	0.023196	0.257732	0.551546	0.675258	0.935567	0.521907	0.405161	0.003866	0.247423	0.462629	0.67268	0.998711	0.291237
0.329624	0.354659	0.315716	0.220056	0.21727	0.233983	0.006954	0.305981	0.567455	0.802503	0.998609	0.002782	0.196106	0.450626	0.714882	0.995828	0.001391	0.225313	0.50904	0.727399	1	0.426982	0.109875	0.463143	0.050139	0.091922	0.005571	0.001391	0.242003	0.421419	0.659249	1	0.082058	0.214186	0.446453	0.535466	0.795549	0.019471	0.260083	0.61057	0.838665	0.987483	0.49235	0.426184	0.005563	0.261474	0.489569	0.668985	0.993046	0.392211
0.367089	0.299578	0.333333	0.182203	0.237288	0.224576	0.008439	0.223629	0.472574	0.797468	1	0.012658	0.244726	0.514768	0.755274	0.995781	0.004219	0.227848	0.489451	0.675105	0.991561	0.291139	0.042194	0.666667	0.021186	0.088983	0.004237	0.004219	0.392405	0.683544	0.805907	1	0.485232	0.489451	0.662447	0.670886	0.818565	0.012658	0.194093	0.409283	0.624473	0.987342	0.540084	0.372881	0.025316	0.303797	0.493671	0.662447	0.970464	0.362869
0.411871	0.284173	0.303957	0.221622	0.23964	0.207207	0.005396	0.223022	0.496403	0.766187	0.998201	0.003597	0.241007	0.46223	0.701439	0.98741	0.001799	0.294964	0.53777	0.76259	1	0.406475	0.393885	0.19964	0.115315	0.054054	0.018018	0.001799	0.266187	0.541367	0.758993	1	0.064748	0.258993	0.526978	0.723022	0.944245	0.02518	0.192446	0.359712	0.667266	0.996403	0.440647	0.392793	0.007194	0.26259	0.48741	0.72482	0.992806	0.30036
0.307339	0.380734	0.311927	0.198157	0.221198	0.253456	0.022936	0.261468	0.495413	0.811927	1	0.009174	0.169725	0.504587	0.784404	0.990826	0.004587	0.270642	0.481651	0.66055	0.880734	0.454128	0.366972	0.178899	0.115207	0.069124	0.004608	0.004587	0.266055	0.568807	0.802752	1	0.027523	0.302752	0.440367	0.619266	0.853211	0.091743	0.224771	0.555046	0.889908	0.977064	0.412844	0.442396	0.03211	0.252294	0.444954	0.66055	0.96789	0.422018
0.246753	0.470779	0.282468	0.214984	0.162866	0.276873	0.00974	0.237013	0.535714	0.766234	0.996753	0.006494	0.25974	0.483766	0.720779	1	0.003247	0.230519	0.474026	0.743506	0.987013	0.512987	0.288961	0.198052	0.114007	0.04886	0.009772	0.003247	0.246753	0.49026	0.75974	1	0.00974	0.279221	0.558442	0.727273	0.941558	0.035714	0.107143	0.396104	0.532468	0.993506	0.522727	0.371336	0.019481	0.327922	0.522727	0.75974	0.987013	0.461039
0.279412	0.411765	0.308824	0.19403	0.208955	0.253731	0.029412	0.147059	0.573529	0.882353	1	0.058824	0.25	0.441176	0.676471	0.941176	0.014706	0.220588	0.367647	0.588235	0.897059	0.529412	0.25	0.220588	0.089552	0.029851	0	0.014706	0.132353	0.426471	0.647059	1	0.161765	0.205882	0.323529	0.455882	0.529412	0.691176	0.720588	0.779412	0.838235	0.897059	0.411765	0.477612	0.073529	0.264706	0.529412	0.661765	0.897059	0.382353
0.388679	0.260377	0.350943	0.185606	0.333333	0.17803	0.007547	0.275472	0.490566	0.762264	1	0.033962	0.192453	0.543396	0.792453	0.973585	0.003774	0.25283	0.467925	0.690566	0.992453	0.309434	0.264151	0.426415	0.068182	0.060606	0.007576	0.003774	0.132075	0.498113	0.713208	1	0.05283	0.14717	0.29434	0.807547	0.988679	0.166038	0.396226	0.520755	0.739623	0.954717	0.475472	0.469697	0.011321	0.245283	0.509434	0.732075	0.981132	0.25283
0.419708	0.383212	0.19708	0.285714	0.190476	0.14652	0.014599	0.215328	0.452555	0.711679	0.992701	0.007299	0.262774	0.554745	0.773723	0.99635	0.00365	0.310219	0.419708	0.726277	1	0.656934	0.083942	0.259124	0.029304	0.058608	0	0.00365	0.208029	0.448905	0.715328	1	0.313869	0.328467	0.423358	0.474453	0.576642	0.010949	0.372263	0.605839	0.828467	0.992701	0.357664	0.380952	0.010949	0.321168	0.474453	0.806569	0.989051	0.39781
0.335329	0.377246	0.287425	0.256	0.186	0.228	0.003992	0.275449	0.552894	0.854291	1	0.00998	0.201597	0.403194	0.704591	0.996008	0.001996	0.297405	0.512974	0.700599	0.962076	0.44511	0.157685	0.397206	0.06	0.076	0.004	0.001996	0.115768	0.349301	0.702595	1	0.125749	0.397206	0.562874	0.746507	0.848303	0.0998	0.329341	0.548902	0.858283	0.984032	0.48503	0.328	0.005988	0.301397	0.491018	0.724551	0.924152	0.411178
0.389247	0.384946	0.225806	0.25	0.200431	0.176724	0.006452	0.219355	0.498925	0.744086	1	0.004301	0.28172	0.56129	0.767742	0.995699	0.002151	0.23871	0.43871	0.660215	0.997849	0.677419	0.094624	0.227957	0.036638	0.040948	0.006466	0.002151	0.27957	0.595699	0.804301	1	0.283871	0.322581	0.436559	0.834409	0.926882	0.032258	0.126882	0.329032	0.486022	0.802151	0.408602	0.37931	0.012903	0.24086	0.443011	0.724731	0.989247	0.380645
0.375	0.367647	0.257353	0.281481	0.177778	0.2	0.022059	0.205882	0.389706	0.654412	0.992647	0.036765	0.235294	0.558824	0.816176	1	0.007353	0.286765	0.477941	0.698529	0.948529	0.316176	0.007353	0.676471	0.014815	0.074074	0	0.007353	0.176471	0.647059	0.911765	1	0.977941	0.977941	0.977941	0.977941	0.977941	0.058824	0.272059	0.441176	0.683824	0.867647	0.411765	0.459259	0.029412	0.308824	0.492647	0.691176	0.926471	0.352941
0.275	0.435	0.29	0.234043	0.18398	0.255319	0.0025	0.25875	0.49875	0.7175	0.99875	0.005	0.25125	0.505	0.75875	1	0.00125	0.2275	0.48625	0.75375	0.9975	0.47375	0.24	0.28625	0.105131	0.060075	0.002503	0.00125	0.23125	0.48875	0.745	1	0.0375	0.195	0.41625	0.7975	0.9975	0.00625	0.3175	0.5375	0.69875	0.98875	0.57	0.397997	0.00375	0.2575	0.47	0.74	0.9975	0.4675
0.344	0.344	0.312	0.217742	0.25	0.217742	0.016	0.168	0.4	0.712	0.992	0.024	0.296	0.472	0.72	0.976	0.008	0.216	0.512	0.792	1	0.312	0.208	0.48	0.080645	0.080645	0	0.008	0.232	0.472	0.816	1	0.248	0.288	0.368	0.448	0.856	0.032	0.16	0.592	0.712	0.96	0.472	0.306452	0.032	0.32	0.48	0.784	0.984	0.392
0.390244	0.260163	0.349593	0.212245	0.302041	0.17551	0.012195	0.235772	0.48374	0.731707	0.995935	0.00813	0.268293	0.54878	0.821138	1	0.004065	0.239837	0.47561	0.699187	0.979675	0.321138	0.219512	0.45935	0.065306	0.065306	0	0.004065	0.109756	0.443089	0.857724	1	0.04065	0.280488	0.365854	0.772358	0.98374	0.113821	0.231707	0.5	0.682927	0.886179	0.520325	0.44898	0.020325	0.264228	0.556911	0.784553	0.98374	0.272358
0.360544	0.439456	0.2	0.280654	0.16485	0.138965	0.005442	0.221769	0.482993	0.729252	1	0.002721	0.308844	0.510204	0.717007	0.995918	0.001361	0.205442	0.484354	0.823129	0.993197	0.72517	0.040816	0.234014	0.025886	0.036785	0.001362	0.001361	0.352381	0.533333	0.714286	1	0.020408	0.187755	0.201361	0.261224	0.859864	0.028571	0.136054	0.296599	0.92517	0.997279	0.217687	0.220708	0.006803	0.160544	0.302041	0.897959	0.993197	0.461224
0.374652	0.264624	0.360724	0.205021	0.304045	0.188285	0.008357	0.252089	0.506964	0.747911	1	0.005571	0.267409	0.550139	0.770195	0.998607	0.001393	0.225627	0.456825	0.714485	0.997214	0.470752	0.231198	0.29805	0.090656	0.059972	0.001395	0.001393	0.203343	0.435933	0.71727	1	0.044568	0.194986	0.44429	0.834262	0.980501	0.006964	0.345404	0.558496	0.725627	0.994429	0.575209	0.421199	0.004178	0.253482	0.48468	0.743733	0.997214	0.275766
0.385993	0.379479	0.234528	0.256117	0.150082	0.190865	0.008143	0.153094	0.436482	0.71987	1	0.003257	0.245928	0.454397	0.747557	0.996743	0.001629	0.387622	0.581433	0.781759	0.998371	0.478827	0.149837	0.371336	0.052202	0.081566	0.003263	0.001629	0.179153	0.399023	0.729642	1	0.271987	0.511401	0.666124	0.781759	0.996743	0.017915	0.307818	0.493485	0.752443	0.959283	0.467427	0.309951	0.013029	0.384365	0.568404	0.763844	0.998371	0.420195
0.348637	0.317073	0.33429	0.218952	0.24336	0.212491	0.004304	0.286227	0.531564	0.761119	0.998565	0.001435	0.193687	0.446915	0.736729	1	0.000717	0.256815	0.498565	0.745337	0.996413	0.275466	0.035868	0.688666	0.015793	0.097631	0.007179	0.000717	0.250359	0.45911	0.719512	1	0.014347	0.14132	0.463415	0.591822	0.763989	0.001435	0.257532	0.522956	0.794835	0.997131	0.543042	0.417803	0.002869	0.232425	0.476327	0.745337	0.996413	0.33142
0.271357	0.522613	0.20603	0.262626	0.121212	0.207071	0.01005	0.226131	0.502513	0.743719	0.98995	0.045226	0.271357	0.562814	0.798995	1	0.005025	0.231156	0.40201	0.547739	0.964824	0.648241	0.201005	0.150754	0.070707	0.020202	0	0.005025	0.180905	0.60804	0.834171	1	0.025126	0.326633	0.492462	0.638191	0.698492	0.226131	0.256281	0.361809	0.396985	0.437186	0.351759	0.262626	0.020101	0.251256	0.386935	0.532663	0.964824	0.537688
0.397436	0.337607	0.264957	0.23176	0.227468	0.188841	0.008547	0.188034	0.397436	0.688034	1	0.025641	0.264957	0.504274	0.730769	0.974359	0.004274	0.350427	0.559829	0.777778	0.995726	0.495726	0.179487	0.324786	0.072961	0.081545	0.012876	0.004274	0.136752	0.273504	0.623932	1	0.247863	0.41453	0.478632	0.666667	0.747863	0.111111	0.512821	0.769231	0.884615	0.995726	0.440171	0.377682	0.017094	0.435897	0.645299	0.777778	0.991453	0.337607
0.365678	0.401168	0.233154	0.269663	0.186067	0.174831	0.002246	0.252022	0.498203	0.749775	0.999102	0.000898	0.234052	0.464061	0.72956	1	0.000449	0.28257	0.570979	0.789757	0.990117	0.649146	0.119946	0.230907	0.054382	0.059775	0.006742	0.000449	0.240791	0.486074	0.730907	1	0.021114	0.375562	0.59434	0.709793	0.969901	0.002695	0.224618	0.466307	0.761456	0.993261	0.367475	0.343371	0.001348	0.268643	0.592992	0.784367	0.990117	0.427673
0.477477	0.189189	0.333333	0.2	0.327273	0.127273	0.018018	0.279279	0.54955	0.783784	0.981982	0.027027	0.18018	0.333333	0.45045	0.972973	0.009009	0.252252	0.504505	0.711712	1	0.315315	0.198198	0.486486	0.072727	0.109091	0	0.009009	0.207207	0.387387	0.657658	1	0.162162	0.225225	0.279279	0.675676	0.72973	0.054054	0.414414	0.558559	0.810811	0.963964	0.477477	0.381818	0.036036	0.342342	0.495495	0.702703	0.972973	0.18018
0.39483	0.373678	0.231492	0.317647	0.172941	0.174118	0.0047	0.19389	0.458284	0.728555	1	0.00235	0.243243	0.473561	0.753231	0.998825	0.001175	0.393655	0.567568	0.766157	0.99765	0.571093	0.108108	0.320799	0.04	0.068235	0.002353	0.001175	0.182139	0.383079	0.745006	1	0.130435	0.478261	0.573443	0.714454	0.915394	0.047004	0.368978	0.584019	0.760282	0.996475	0.427732	0.327059	0.005875	0.400705	0.581669	0.759107	0.99765	0.407756
0.36612	0.273224	0.360656	0.192308	0.296703	0.192308	0.016393	0.256831	0.47541	0.759563	1	0.027322	0.169399	0.437158	0.639344	0.934426	0.005464	0.31694	0.562842	0.781421	0.994536	0.420765	0.42623	0.153005	0.137363	0.049451	0.005495	0.005464	0.213115	0.540984	0.814208	1	0.027322	0.344262	0.508197	0.710383	0.994536	0.103825	0.136612	0.289617	0.644809	0.879781	0.448087	0.494505	0.032787	0.278689	0.502732	0.748634	0.994536	0.311475
0.343949	0.343949	0.312102	0.307692	0.198718	0.230769	0.012739	0.235669	0.477707	0.738854	1	0.076433	0.242038	0.452229	0.719745	0.993631	0.006369	0.184713	0.535032	0.726115	0.961783	0.630573	0.165605	0.203822	0.057692	0.044872	0.019231	0.006369	0.191083	0.350318	0.617834	1	0.019108	0.490446	0.764331	0.821656	0.974522	0.044586	0.541401	0.66242	0.88535	0.936306	0.414013	0.410256	0.019108	0.261146	0.414013	0.707006	0.968153	0.369427
0.339286	0.428571	0.232143	0.254545	0.218182	0.236364	0.053571	0.214286	0.375	0.785714	0.982143	0.035714	0.160714	0.464286	0.714286	1	0.017857	0.339286	0.482143	0.660714	0.964286	0.714286	0.160714	0.125	0.109091	0.072727	0	0.017857	0.25	0.553571	0.767857	1	0.285714	0.303571	0.446429	0.482143	0.607143	0.089286	0.089286	0.125	0.875	0.910714	0.25	0.472727	0.267857	0.339286	0.517857	0.696429	0.964286	0.446429
0.342857	0.409524	0.247619	0.259615	0.163462	0.192308	0.019048	0.180952	0.409524	0.628571	0.990476	0.028571	0.228571	0.485714	0.761905	1	0.009524	0.285714	0.561905	0.771429	0.961905	0.485714	0.047619	0.466667	0.038462	0.115385	0	0.009524	0.2	0.4	0.847619	1	0.295238	0.295238	0.304762	0.942857	0.961905	0.038095	0.257143	0.542857	0.714286	0.838095	0.361905	0.307692	0.057143	0.371429	0.714286	0.8	0.961905	0.361905
0.356917	0.427666	0.215417	0.27907	0.150106	0.174419	0.002112	0.192186	0.472017	0.731785	0.998944	0.006336	0.270327	0.589229	0.797254	1	0.001056	0.275607	0.43717	0.599789	0.997888	0.644139	0.105597	0.250264	0.039112	0.053911	0.003171	0.001056	0.210137	0.618796	0.829989	1	0.020063	0.372756	0.481521	0.582893	0.965153	0.040127	0.277719	0.407603	0.560718	0.800422	0.475185	0.325581	0.003168	0.319958	0.501584	0.739176	0.986272	0.451954
0.32199	0.324607	0.353403	0.230971	0.217848	0.246719	0.005236	0.227749	0.497382	0.769634	1	0.007853	0.251309	0.47644	0.759162	0.997382	0.002618	0.23822	0.502618	0.727749	0.986911	0.463351	0.209424	0.327225	0.052493	0.068241	0.015748	0.002618	0.157068	0.45288	0.685864	1	0.044503	0.235602	0.518325	0.717277	0.879581	0.041885	0.356021	0.494764	0.850785	0.992147	0.565445	0.388451	0.013089	0.256545	0.484293	0.730366	0.986911	0.324607
0.383117	0.266234	0.350649	0.183007	0.294118	0.183007	0.012987	0.272727	0.441558	0.714286	1	0.084416	0.233766	0.571429	0.785714	0.967532	0.006494	0.194805	0.487013	0.720779	0.961039	0.37013	0.311688	0.318182	0.130719	0.039216	0.013072	0.006494	0.142857	0.551948	0.766234	1	0.012987	0.24026	0.603896	0.863636	0.961039	0.162338	0.311688	0.38961	0.467532	0.798701	0.38961	0.48366	0.019481	0.201299	0.519481	0.720779	0.954545	0.25974
0.385965	0.280702	0.333333	0.19469	0.238938	0.19469	0.04386	0.210526	0.491228	0.701754	1	0.026316	0.368421	0.614035	0.789474	0.991228	0.008772	0.175439	0.429825	0.710526	0.973684	0.385965	0.166667	0.447368	0.044248	0.097345	0.00885	0.008772	0.192982	0.350877	0.692982	1	0.263158	0.289474	0.394737	0.438596	0.745614	0.061404	0.447368	0.578947	0.859649	0.973684	0.429825	0.371681	0.035088	0.315789	0.535088	0.719298	0.973684	0.307018
0.306383	0.32766	0.365957	0.213675	0.230769	0.230769	0.029787	0.26383	0.582979	0.812766	0.987234	0.008511	0.238298	0.421277	0.689362	0.995745	0.004255	0.221277	0.493617	0.72766	1	0.438298	0.374468	0.187234	0.136752	0.051282	0.017094	0.004255	0.246809	0.468085	0.67234	1	0.008511	0.170213	0.331915	0.574468	0.804255	0.391489	0.719149	0.86383	0.919149	0.965957	0.561702	0.350427	0.008511	0.27234	0.510638	0.72766	0.948936	0.357447
0.37265	0.321368	0.305983	0.22774	0.239726	0.190068	0.003419	0.232479	0.482051	0.777778	1	0.008547	0.271795	0.528205	0.757265	0.998291	0.001709	0.22906	0.480342	0.702564	0.989744	0.494017	0.176068	0.329915	0.063356	0.070205	0.005137	0.001709	0.213675	0.475214	0.764103	1	0.042735	0.25812	0.452991	0.564103	0.704274	0.05812	0.283761	0.622222	0.837607	0.996581	0.466667	0.363014	0.006838	0.247863	0.488889	0.697436	0.996581	0.353846
0.33123	0.353312	0.315457	0.259494	0.177215	0.246835	0.012618	0.271293	0.520505	0.772871	0.990536	0.006309	0.176656	0.44795	0.694006	0.996845	0.003155	0.287066	0.514196	0.744479	1	0.403785	0.22082	0.375394	0.063291	0.063291	0	0.003155	0.157729	0.40694	0.637224	1	0.059937	0.208202	0.425868	0.782334	0.949527	0.097792	0.369085	0.574132	0.829653	0.987382	0.542587	0.316456	0.056782	0.239748	0.492114	0.722397	0.993691	0.394322
0.352113	0.347418	0.300469	0.264151	0.226415	0.216981	0.018779	0.253521	0.497653	0.737089	0.976526	0.00939	0.220657	0.478873	0.769953	0.995305	0.004695	0.2723	0.488263	0.723005	1	0.525822	0.230047	0.244131	0.056604	0.056604	0.009434	0.004695	0.140845	0.41784	0.680751	1	0.201878	0.314554	0.539906	0.737089	0.929577	0.122066	0.366197	0.624413	0.830986	0.953052	0.441315	0.339623	0.164319	0.361502	0.558685	0.723005	0.948357	0.384977
0.323988	0.303219	0.372793	0.201663	0.22869	0.22973	0.002077	0.234683	0.460021	0.738318	0.998962	0.005192	0.277259	0.519211	0.754933	1	0.001038	0.246106	0.480789	0.748702	0.994808	0.253375	0.006231	0.740395	0.004158	0.095634	0.002079	0.001038	0.285566	0.509865	0.721703	1	0.008307	0.008307	0.627207	0.628245	0.846314	0.003115	0.239875	0.494289	0.752856	0.996885	0.569055	0.380457	0.005192	0.258567	0.522326	0.760125	0.997923	0.327103
0.418367	0.340136	0.241497	0.279863	0.221843	0.177474	0.013605	0.248299	0.527211	0.772109	1	0.006803	0.261905	0.486395	0.714286	0.982993	0.003401	0.207483	0.455782	0.738095	0.962585	0.612245	0.20068	0.187075	0.081911	0.054608	0.006826	0.003401	0.261905	0.496599	0.663265	1	0.020408	0.285714	0.639456	0.812925	0.931973	0.013605	0.183673	0.336735	0.843537	0.986395	0.346939	0.327645	0.027211	0.241497	0.557823	0.758503	0.962585	0.380952
0.316804	0.429752	0.253444	0.248619	0.162983	0.19337	0.019284	0.236915	0.506887	0.790634	1	0.00551	0.300275	0.482094	0.707989	0.991736	0.002755	0.179063	0.584022	0.741047	0.99449	0.68595	0.088154	0.225895	0.038674	0.060773	0	0.002755	0.294766	0.584022	0.774105	1	0.022039	0.099174	0.143251	0.374656	0.435262	0.055096	0.184573	0.482094	0.636364	0.99449	0.504132	0.425414	0.019284	0.311295	0.526171	0.719008	0.99449	0.410468
0.455882	0.25	0.294118	0.298507	0.238806	0.149254	0.029412	0.176471	0.455882	0.720588	0.985294	0.117647	0.235294	0.441176	0.602941	0.911765	0.014706	0.308824	0.485294	0.838235	1	0.558824	0.029412	0.411765	0.029851	0.059701	0	0.014706	0.132353	0.411765	0.573529	1	0.470588	0.470588	0.470588	0.470588	0.485294	0.279412	0.367647	0.676471	0.779412	0.882353	0.367647	0.447761	0.073529	0.323529	0.544118	0.764706	0.926471	0.264706
0.405063	0.348101	0.246835	0.282092	0.196513	0.169572	0.003165	0.261076	0.52057	0.787975	0.995253	0.015823	0.280063	0.572785	0.781646	1	0.001582	0.199367	0.39557	0.620253	0.998418	0.530063	0.183544	0.286392	0.07607	0.050713	0.006339	0.001582	0.273734	0.617089	0.848101	1	0.007911	0.129747	0.27057	0.504747	0.993671	0.123418	0.299051	0.427215	0.661392	0.898734	0.463608	0.399366	0.006329	0.223101	0.43038	0.670886	0.993671	0.375
0.316327	0.331633	0.352041	0.2	0.241026	0.235897	0.010204	0.229592	0.484694	0.709184	0.994898	0.02551	0.239796	0.510204	0.826531	1	0.005102	0.244898	0.459184	0.673469	0.989796	0.382653	0.403061	0.214286	0.164103	0.030769	0	0.005102	0.219388	0.515306	0.755102	1	0.015306	0.173469	0.47449	0.683673	0.989796	0.336735	0.382653	0.438776	0.790816	0.846939	0.479592	0.451282	0.020408	0.362245	0.505102	0.693878	0.959184	0.30102
0.335227	0.434659	0.230114	0.253561	0.190883	0.165242	0.022727	0.221591	0.451705	0.701705	0.988636	0.005682	0.309659	0.573864	0.809659	1	0.002841	0.184659	0.366477	0.650568	0.963068	0.659091	0.150568	0.190341	0.062678	0.051282	0	0.002841	0.400568	0.627841	0.835227	1	0.019886	0.113636	0.25	0.346591	0.491477	0.056818	0.15625	0.372159	0.525568	0.71875	0.53125	0.393162	0.019886	0.298295	0.571023	0.809659	0.994318	0.454545
0.344538	0.367647	0.287815	0.242105	0.2	0.185263	0.004202	0.25	0.476891	0.743697	0.995798	0.008403	0.228992	0.491597	0.726891	1	0.002101	0.258403	0.537815	0.773109	0.968487	0.558824	0.197479	0.243697	0.067368	0.054737	0	0.002101	0.231092	0.497899	0.741597	1	0.056723	0.210084	0.409664	0.82563	0.968487	0.079832	0.359244	0.548319	0.75	0.995798	0.47479	0.353684	0.014706	0.310924	0.533613	0.756303	0.970588	0.380252
0.351598	0.410959	0.237443	0.284404	0.169725	0.155963	0.027397	0.237443	0.479452	0.721461	1	0.009132	0.242009	0.56621	0.780822	0.990868	0.004566	0.26484	0.474886	0.643836	0.876712	0.447489	0.077626	0.474886	0.045872	0.073394	0	0.004566	0.287671	0.561644	0.780822	1	0.045662	0.639269	0.666667	0.694064	0.744292	0.086758	0.219178	0.401826	0.60274	0.917808	0.420091	0.40367	0.050228	0.269406	0.520548	0.675799	0.90411	0.369863
0.318072	0.433735	0.248193	0.2657	0.169082	0.214976	0.004819	0.214458	0.481928	0.725301	0.990361	0.007229	0.260241	0.515663	0.785542	1	0.00241	0.26988	0.520482	0.718072	0.992771	0.583133	0.151807	0.26506	0.067633	0.082126	0	0.00241	0.286747	0.549398	0.8	1	0.115663	0.298795	0.46988	0.648193	0.763855	0.007229	0.091566	0.486747	0.718072	0.987952	0.46506	0.381643	0.007229	0.296386	0.583133	0.792771	0.995181	0.428916
0.326336	0.387405	0.28626	0.23327	0.160612	0.229446	0.017176	0.278626	0.562977	0.839695	0.992366	0.003817	0.198473	0.492366	0.73855	0.998092	0.001908	0.253817	0.444656	0.650763	1	0.454198	0.076336	0.469466	0.024857	0.07457	0.005736	0.001908	0.259542	0.620229	0.841603	1	0.05916	0.175573	0.206107	0.59542	0.803435	0.005725	0.312977	0.482824	0.650763	0.98855	0.526718	0.305927	0.007634	0.242366	0.484733	0.667939	0.996183	0.417939
0.216567	0.502994	0.280439	0.155844	0.135864	0.308691	0.005988	0.316367	0.478044	0.611776	0.996008	0.001996	0.233533	0.552894	0.769461	1	0.000998	0.231537	0.474052	0.720559	0.999002	0.737525	0.132735	0.129741	0.053946	0.033966	0	0.000998	0.243513	0.52994	0.763473	1	0.001996	0.287425	0.463074	0.615768	0.999002	0.015968	0.316367	0.449102	0.597804	0.98503	0.583832	0.337662	0.001996	0.261477	0.58982	0.795409	0.999002	0.503992
0.373434	0.358396	0.26817	0.233375	0.183187	0.196989	0.002506	0.250627	0.513784	0.753133	0.998747	0.007519	0.201754	0.451128	0.746867	1	0.001253	0.300752	0.502506	0.739348	0.997494	0.512531	0.116541	0.370927	0.046424	0.076537	0.003764	0.001253	0.129073	0.389724	0.710526	1	0.182957	0.365915	0.517544	0.672932	0.91604	0.053885	0.373434	0.615288	0.833333	0.991228	0.427318	0.311167	0.010025	0.313283	0.487469	0.720551	0.997494	0.383459
0.307143	0.321429	0.371429	0.150538	0.229391	0.25448	0.017857	0.221429	0.489286	0.807143	0.982143	0.007143	0.307143	0.553571	0.696429	1	0.003571	0.210714	0.460714	0.714286	0.989286	0.364286	0.175	0.460714	0.050179	0.09319	0	0.003571	0.189286	0.442857	0.721429	1	0.157143	0.317857	0.414286	0.621429	0.714286	0.007143	0.221429	0.510714	0.810714	0.992857	0.546429	0.401434	0.014286	0.246429	0.464286	0.678571	0.989286	0.328571
0.363636	0.46281	0.173554	0.4	0.141667	0.1	0.016529	0.280992	0.570248	0.760331	1	0.033058	0.330579	0.578512	0.818182	0.991736	0.008264	0.132231	0.256198	0.347107	0.702479	0.61157	0.173554	0.214876	0.083333	0.066667	0	0.008264	0.231405	0.553719	0.842975	1	0.090909	0.123967	0.198347	0.280992	0.413223	0.454545	0.495868	0.694215	0.743802	0.809917	0.247934	0.266667	0.041322	0.181818	0.305785	0.371901	0.77686	0.487603
0.336842	0.336842	0.326316	0.21164	0.259259	0.26455	0.021053	0.242105	0.478947	0.736842	1	0.010526	0.184211	0.431579	0.731579	0.984211	0.005263	0.321053	0.542105	0.757895	0.973684	0.405263	0.473684	0.121053	0.164021	0.037037	0.005291	0.005263	0.284211	0.589474	0.815789	1	0.010526	0.336842	0.531579	0.705263	0.978947	0.078947	0.1	0.242105	0.289474	0.736842	0.468421	0.507937	0.015789	0.257895	0.478947	0.726316	0.984211	0.342105
0.334694	0.338776	0.326531	0.239782	0.202997	0.220708	0.005442	0.216327	0.482993	0.74966	1	0.002721	0.220408	0.493878	0.736054	0.998639	0.001361	0.296599	0.510204	0.753741	0.994558	0.404082	0.14966	0.446259	0.049046	0.095368	0	0.001361	0.236735	0.526531	0.759184	1	0.134694	0.27483	0.481633	0.536054	0.95102	0.013605	0.206803	0.553741	0.771429	0.987755	0.559184	0.318801	0.004082	0.285714	0.506122	0.729252	0.995918	0.357823
0.316764	0.481481	0.201754	0.277073	0.12	0.187317	0.001949	0.268031	0.560429	0.760234	1	0.002924	0.199805	0.445419	0.736842	0.998051	0.000975	0.334308	0.538012	0.755361	0.999025	0.658869	0.103314	0.237817	0.046829	0.056585	0.001951	0.000975	0.229045	0.466862	0.74269	1	0.004873	0.34308	0.598441	0.737817	0.968811	0.013645	0.2846	0.536062	0.750487	0.993177	0.447368	0.308293	0.004873	0.277778	0.469786	0.71345	0.995127	0.448343
0.333333	0.347222	0.319444	0.230769	0.195804	0.244755	0.048611	0.3125	0.541667	0.770833	1	0.013889	0.215278	0.5	0.673611	0.979167	0.006944	0.173611	0.479167	0.701389	0.909722	0.604167	0.277778	0.118056	0.125874	0.041958	0	0.006944	0.173611	0.513889	0.8125	1	0.236111	0.319444	0.486111	0.638889	0.909722	0.0625	0.083333	0.201389	0.75	0.784722	0.416667	0.363636	0.034722	0.194444	0.423611	0.645833	0.923611	0.354167
0.295775	0.394366	0.309859	0.257143	0.142857	0.285714	0.084507	0.239437	0.492958	0.704225	0.929577	0.070423	0.295775	0.577465	0.859155	0.985915	0.014085	0.169014	0.323944	0.56338	1	0.43662	0.366197	0.197183	0.142857	0.028571	0	0.014085	0.239437	0.549296	0.887324	1	0.028169	0.098592	0.28169	0.408451	0.591549	0.619718	0.647887	0.704225	0.746479	0.802817	0.366197	0.371429	0.028169	0.169014	0.352113	0.521127	0.71831	0.394366
0.310484	0.423387	0.266129	0.259109	0.17004	0.222672	0.008065	0.217742	0.475806	0.733871	0.979839	0.016129	0.266129	0.512097	0.762097	1	0.004032	0.258065	0.455645	0.677419	0.983871	0.306452	0.100806	0.592742	0.032389	0.11336	0	0.004032	0.153226	0.375	0.754032	1	0.451613	0.782258	0.830645	0.862903	0.891129	0.052419	0.274194	0.475806	0.641129	0.971774	0.475806	0.331984	0.064516	0.266129	0.459677	0.66129	0.983871	0.439516
0.423913	0.336957	0.23913	0.351648	0.186813	0.175824	0.032609	0.195652	0.434783	0.728261	1	0.021739	0.173913	0.413043	0.695652	0.934783	0.01087	0.358696	0.521739	0.804348	0.978261	0.597826	0.032609	0.369565	0.043956	0.043956	0	0.01087	0.141304	0.293478	0.554348	1	0.380435	0.380435	0.380435	0.391304	0.586957	0.445652	0.521739	0.782609	0.869565	0.967391	0.358696	0.395604	0.130435	0.434783	0.597826	0.804348	0.934783	0.347826
0.272189	0.573964	0.153846	0.220238	0.113095	0.113095	0.017751	0.183432	0.343195	0.47929	0.934911	0.011834	0.497041	0.656805	0.816568	0.994083	0.005917	0.076923	0.218935	0.35503	1	0.650888	0.218935	0.130178	0.083333	0.02381	0	0.005917	0.431953	0.633136	0.822485	1	0.04142	0.207101	0.295858	0.455621	0.869822	0.112426	0.136095	0.171598	0.360947	0.39645	0.591716	0.321429	0.035503	0.313609	0.662722	0.822485	0.988166	0.579882
0.417062	0.331754	0.251185	0.333333	0.166667	0.171429	0.014218	0.28436	0.601896	0.819905	1	0.009479	0.165877	0.417062	0.672986	0.990521	0.004739	0.255924	0.488152	0.649289	0.981043	0.488152	0.218009	0.293839	0.061905	0.071429	0.014286	0.004739	0.14218	0.421801	0.819905	1	0.123223	0.222749	0.364929	0.601896	0.672986	0.075829	0.488152	0.71564	0.78673	0.971564	0.374408	0.314286	0.042654	0.255924	0.407583	0.606635	0.981043	0.298578
0.320594	0.464968	0.214437	0.240426	0.129787	0.191489	0.006369	0.212314	0.422505	0.842887	0.995754	0.004246	0.29087	0.537155	0.70276	1	0.002123	0.22293	0.443737	0.660297	0.95966	0.685775	0.080679	0.233546	0.040426	0.057447	0.002128	0.002123	0.265393	0.503185	0.675159	1	0.014862	0.150743	0.193206	0.271762	0.859873	0.029724	0.301486	0.749469	0.834395	0.980892	0.467091	0.331915	0.008493	0.216561	0.477707	0.622081	0.95966	0.469214
0.380328	0.498361	0.121311	0.273026	0.098684	0.095395	0.006557	0.180328	0.488525	0.744262	1	0.013115	0.27541	0.406557	0.737705	0.996721	0.003279	0.55082	0.629508	0.763934	0.927869	0.806557	0.095082	0.098361	0.039474	0.039474	0	0.003279	0.219672	0.422951	0.793443	1	0.045902	0.613115	0.67541	0.757377	0.783607	0.032787	0.491803	0.586885	0.704918	0.957377	0.186885	0.203947	0.009836	0.540984	0.636066	0.721311	0.957377	0.511475
0.403642	0.29742	0.298938	0.237082	0.212766	0.18541	0.004552	0.2261	0.482549	0.737481	0.990895	0.003035	0.233687	0.508346	0.778452	0.998483	0.001517	0.291351	0.505311	0.740516	1	0.509863	0.171472	0.318665	0.072948	0.06079	0	0.001517	0.224583	0.465857	0.770865	1	0.013657	0.233687	0.405159	0.585736	0.907436	0.047041	0.294385	0.599393	0.889226	0.992413	0.491654	0.325228	0.01214	0.280728	0.566009	0.799697	0.996965	0.306525
0.3657	0.310214	0.324086	0.20202	0.268939	0.207071	0.002522	0.254729	0.491803	0.742749	1	0.005044	0.240858	0.535939	0.784363	0.993695	0.001261	0.221942	0.479193	0.722573	0.996217	0.464061	0.235813	0.300126	0.102273	0.056818	0.003788	0.001261	0.208071	0.448928	0.737705	1	0.039092	0.199243	0.423707	0.79319	0.996217	0.006305	0.325347	0.577554	0.751576	0.991173	0.57377	0.424242	0.003783	0.266078	0.482976	0.747793	0.996217	0.364439
0.323944	0.338028	0.338028	0.229682	0.240283	0.201413	0.007042	0.302817	0.517606	0.795775	1	0.010563	0.235915	0.478873	0.721831	0.992958	0.003521	0.221831	0.492958	0.732394	0.989437	0.366197	0.172535	0.461268	0.04947	0.106007	0	0.003521	0.211268	0.471831	0.711268	1	0.112676	0.271127	0.40493	0.609155	0.700704	0.014085	0.242958	0.507042	0.809859	0.978873	0.549296	0.402827	0.024648	0.232394	0.471831	0.672535	0.989437	0.369718
0.411043	0.251534	0.337423	0.160494	0.265432	0.185185	0.02454	0.276074	0.552147	0.846626	1	0.01227	0.202454	0.460123	0.668712	0.871166	0.006135	0.220859	0.435583	0.717791	0.98773	0.404908	0.294479	0.300613	0.080247	0.04321	0.018519	0.006135	0.122699	0.380368	0.533742	1	0.079755	0.208589	0.398773	0.711656	0.803681	0.159509	0.558282	0.638037	0.90184	0.981595	0.453988	0.296296	0.079755	0.251534	0.429448	0.687117	0.957055	0.233129
0.313589	0.397213	0.289199	0.223776	0.178322	0.244755	0.038328	0.229965	0.41115	0.783972	1	0.006969	0.292683	0.526132	0.686411	0.993031	0.003484	0.191638	0.508711	0.790941	0.989547	0.606272	0.188153	0.205575	0.083916	0.048951	0	0.003484	0.355401	0.529617	0.679443	1	0.010453	0.170732	0.313589	0.853659	0.993031	0.101045	0.146341	0.348432	0.804878	0.937282	0.439024	0.405594	0.010453	0.212544	0.522648	0.763066	0.993031	0.390244
0.345133	0.389381	0.265487	0.25	0.196429	0.1875	0.035398	0.221239	0.451327	0.716814	0.982301	0.017699	0.274336	0.530973	0.743363	1	0.00885	0.123894	0.389381	0.690265	0.99115	0.460177	0.530973	0.00885	0.169643	0.008929	0.008929	0.00885	0.19469	0.486726	0.725664	1	0.044248	0.283186	0.566372	0.787611	0.99115	0.035398	0.035398	0.035398	0.035398	0.035398	0.40708	0.285714	0.044248	0.265487	0.557522	0.672566	0.99115	0.415929
0.371859	0.321608	0.306533	0.181818	0.257576	0.171717	0.095477	0.296482	0.532663	0.743719	1	0.01005	0.130653	0.417085	0.733668	0.994975	0.005025	0.271357	0.477387	0.753769	0.984925	0.422111	0.266332	0.311558	0.10101	0.060606	0.010101	0.005025	0.145729	0.326633	0.693467	1	0.201005	0.351759	0.673367	0.909548	0.994975	0.015075	0.39196	0.532663	0.60804	0.874372	0.417085	0.454545	0.025126	0.201005	0.437186	0.733668	0.984925	0.311558
0.382582	0.349922	0.267496	0.274143	0.214953	0.188474	0.004666	0.317263	0.562986	0.765163	0.998445	0.00311	0.222395	0.489891	0.790047	1	0.001555	0.202177	0.412131	0.651633	0.993779	0.51633	0.144635	0.339036	0.057632	0.066978	0.007788	0.001555	0.29549	0.676516	0.861586	1	0.07154	0.283048	0.391913	0.539658	0.872473	0.012442	0.186625	0.40591	0.606532	0.85381	0.471229	0.342679	0.012442	0.202177	0.412131	0.62675	0.993779	0.387247
0.349921	0.349398	0.300681	0.237421	0.208071	0.21174	0.002095	0.193819	0.466213	0.751179	0.998428	0.003667	0.282347	0.521739	0.756417	1	0.000524	0.262441	0.511786	0.739654	0.999476	0.487166	0.110005	0.402829	0.045597	0.078092	0.005765	0.000524	0.194343	0.500786	0.732844	1	0.021477	0.243059	0.515977	0.638554	0.97957	0.008381	0.283918	0.489785	0.798848	0.997905	0.514929	0.368973	0.005238	0.276585	0.524882	0.728654	0.999476	0.374018
0.295082	0.472131	0.232787	0.223684	0.190789	0.180921	0.013115	0.2	0.367213	0.580328	0.993443	0.006557	0.390164	0.652459	0.829508	1	0.003279	0.134426	0.380328	0.645902	0.996721	0.691803	0.098361	0.209836	0.039474	0.072368	0	0.003279	0.321311	0.514754	0.740984	1	0.013115	0.101639	0.134426	0.213115	0.354098	0.052459	0.163934	0.609836	0.84918	0.95082	0.468852	0.440789	0.009836	0.285246	0.531148	0.72459	0.937705	0.47541
0.408451	0.305164	0.286385	0.221698	0.240566	0.150943	0.023474	0.225352	0.507042	0.769953	0.985915	0.00939	0.262911	0.413146	0.558685	1	0.004695	0.187793	0.605634	0.798122	0.995305	0.530516	0.14554	0.323944	0.084906	0.066038	0	0.004695	0.262911	0.403756	0.647887	1	0.014085	0.061033	0.600939	0.755869	0.938967	0.098592	0.215962	0.57277	0.802817	0.995305	0.516432	0.386792	0.018779	0.319249	0.525822	0.755869	0.995305	0.309859
0.512465	0.3241	0.163435	0.297222	0.152778	0.091667	0.019391	0.32964	0.559557	0.792244	0.98892	0.00554	0.185596	0.33795	0.587258	0.99446	0.00277	0.315789	0.567867	0.781163	1	0.401662	0.027701	0.570637	0.011111	0.072222	0	0.00277	0.157895	0.288089	0.534626	1	0.548476	0.551247	0.559557	0.565097	0.781163	0.01108	0.385042	0.65928	0.828255	0.98892	0.174515	0.255556	0.01108	0.32133	0.65374	0.775623	0.99169	0.34349
0.35	0.45	0.2	0.305439	0.125523	0.138075	0.008333	0.1875	0.5125	0.766667	1	0.029167	0.2375	0.420833	0.583333	0.9875	0.004167	0.575	0.725	0.85	0.995833	0.645833	0.083333	0.270833	0.033473	0.09205	0	0.004167	0.1875	0.366667	0.5625	1	0.575	0.666667	0.6875	0.733333	0.8875	0.0125	0.5125	0.779167	0.904167	0.979167	0.2875	0.292887	0.025	0.404167	0.683333	0.829167	0.983333	0.4875
0.364583	0.354167	0.28125	0.263158	0.242105	0.189474	0.03125	0.21875	0.416667	0.677083	0.958333	0.020833	0.270833	0.5625	0.770833	1	0.010417	0.197917	0.40625	0.697917	0.947917	0.239583	0	0.760417	0	0.063158	0	0.010417	0.4375	0.708333	0.9375	1	0	0	0	0	0	0.052083	0.229167	0.416667	0.635417	0.90625	0.3125	0.463158	0.072917	0.25	0.53125	0.697917	0.947917	0.34375
0.283537	0.60061	0.115854	0.30687	0.083969	0.122137	0.007622	0.329268	0.5625	0.786585	0.996951	0.003049	0.190549	0.39939	0.722561	1	0.001524	0.527439	0.632622	0.806402	0.978659	0.862805	0.04878	0.088415	0.025954	0.025954	0.001527	0.001524	0.269817	0.48628	0.772866	1	0.07622	0.551829	0.608232	0.635671	0.817073	0.012195	0.088415	0.170732	0.640244	0.990854	0.527439	0.332824	0.009146	0.344512	0.612805	0.818598	0.978659	0.58689
0.444149	0.295213	0.260638	0.232	0.218667	0.162667	0.005319	0.271277	0.505319	0.707447	1	0.023936	0.231383	0.478723	0.765957	0.99734	0.00266	0.199468	0.489362	0.800532	0.986702	0.513298	0.279255	0.207447	0.090667	0.058667	0.005333	0.00266	0.327128	0.515957	0.720745	1	0.029255	0.175532	0.300532	0.864362	0.984043	0.007979	0.412234	0.587766	0.773936	0.837766	0.430851	0.336	0.021277	0.207447	0.361702	0.81383	0.986702	0.332447
0.42236	0.282609	0.295031	0.242991	0.208723	0.161994	0.015528	0.167702	0.385093	0.717391	1	0.006211	0.279503	0.509317	0.751553	0.990683	0.003106	0.357143	0.568323	0.776398	0.996894	0.335404	0.114907	0.549689	0.05919	0.05296	0.003115	0.003106	0.462733	0.686335	0.854037	1	0.416149	0.459627	0.664596	0.763975	0.937888	0.052795	0.186335	0.322981	0.571429	0.993789	0.381988	0.386293	0.037267	0.431677	0.57764	0.757764	0.996894	0.304348
0.347165	0.417704	0.235131	0.270083	0.171745	0.17867	0.008299	0.261411	0.547718	0.775934	1	0.011065	0.26971	0.525588	0.757953	0.998617	0.001383	0.211618	0.392808	0.69018	0.991701	0.759336	0.107884	0.13278	0.044321	0.044321	0.00277	0.001383	0.304288	0.550484	0.780083	1	0.002766	0.215768	0.319502	0.576763	0.858921	0.058091	0.192254	0.298755	0.687414	0.959889	0.392808	0.357341	0.002766	0.211618	0.417704	0.596127	0.97787	0.42462
0.454545	0.363636	0.181818	0.367816	0.172414	0.114943	0.034091	0.227273	0.454545	0.795455	1	0.022727	0.272727	0.534091	0.704545	0.988636	0.011364	0.318182	0.443182	0.75	0.943182	0.170455	0.011364	0.818182	0.022989	0.068966	0	0.011364	0.034091	0.488636	0.772727	1	0.761364	0.761364	0.761364	0.761364	0.761364	0.056818	0.25	0.454545	0.693182	0.977273	0.340909	0.45977	0.079545	0.352273	0.579545	0.75	0.943182	0.386364
0.356589	0.406977	0.236434	0.245136	0.171206	0.167315	0.023256	0.271318	0.562016	0.75969	1	0.011628	0.286822	0.503876	0.689922	0.988372	0.003876	0.158915	0.379845	0.77907	0.98062	0.453488	0.248062	0.29845	0.081712	0.089494	0.003891	0.003876	0.306202	0.577519	0.724806	1	0.007752	0.085271	0.182171	0.290698	0.837209	0.426357	0.503876	0.709302	0.875969	0.988372	0.360465	0.44358	0.007752	0.224806	0.48062	0.825581	0.984496	0.434109
0.380952	0.306122	0.312925	0.19863	0.239726	0.191781	0.013605	0.340136	0.591837	0.829932	0.972789	0.054422	0.190476	0.401361	0.659864	1	0.006803	0.210884	0.469388	0.70068	0.952381	0.37415	0.312925	0.312925	0.089041	0.047945	0.034247	0.006803	0.251701	0.435374	0.659864	1	0.020408	0.163265	0.367347	0.707483	0.809524	0.027211	0.52381	0.612245	0.897959	0.979592	0.455782	0.369863	0.027211	0.210884	0.408163	0.680272	0.979592	0.272109
0.318182	0.465909	0.215909	0.275862	0.137931	0.218391	0.034091	0.272727	0.420455	0.636364	0.988636	0.022727	0.238636	0.579545	0.772727	1	0.011364	0.102273	0.397727	0.784091	0.931818	0.579545	0.090909	0.329545	0.045977	0.045977	0	0.011364	0.352273	0.647727	0.795455	1	0.534091	0.545455	0.863636	0.886364	0.909091	0.022727	0.090909	0.170455	0.397727	0.488636	0.636364	0.252874	0.045455	0.352273	0.522727	0.795455	0.965909	0.5
0.382488	0.366359	0.251152	0.258661	0.17321	0.184758	0.009217	0.278802	0.52765	0.806452	1	0.004608	0.274194	0.518433	0.705069	0.988479	0.002304	0.184332	0.394009	0.732719	0.981567	0.709677	0.16129	0.129032	0.060046	0.032333	0	0.002304	0.352535	0.529954	0.709677	1	0.105991	0.221198	0.292627	0.797235	0.884793	0.006912	0.059908	0.145161	0.767281	0.85023	0.297235	0.290993	0.006912	0.152074	0.274194	0.732719	0.981567	0.384793
0.435233	0.259067	0.305699	0.203125	0.291667	0.192708	0.015544	0.259067	0.502591	0.772021	1	0.010363	0.176166	0.435233	0.694301	0.984456	0.005181	0.248705	0.507772	0.73057	0.994819	0.455959	0.450777	0.093264	0.125	0.03125	0	0.005181	0.274611	0.580311	0.854922	1	0.015544	0.305699	0.492228	0.65285	0.906736	0.07772	0.093264	0.227979	0.248705	0.683938	0.42487	0.458333	0.025907	0.284974	0.46114	0.694301	0.911917	0.26943
0.404959	0.322314	0.272727	0.225	0.241667	0.191667	0.016529	0.190083	0.413223	0.710744	0.991736	0.033058	0.305785	0.53719	0.768595	0.975207	0.008264	0.280992	0.471074	0.735537	1	0.330579	0.231405	0.438017	0.083333	0.083333	0	0.008264	0.239669	0.487603	0.809917	1	0.256198	0.330579	0.38843	0.752066	0.85124	0.041322	0.140496	0.586777	0.694215	0.958678	0.446281	0.3	0.099174	0.330579	0.487603	0.793388	0.983471	0.272727
0.424242	0.30303	0.272727	0.305344	0.221374	0.21374	0.022727	0.325758	0.515152	0.772727	1	0.015152	0.227273	0.530303	0.80303	0.992424	0.007576	0.143939	0.371212	0.659091	0.954545	0.530303	0.113636	0.356061	0.045802	0.091603	0	0.007576	0.295455	0.712121	0.840909	1	0.022727	0.037879	0.128788	0.159091	0.954545	0.204545	0.310606	0.484848	0.613636	0.704545	0.416667	0.48855	0.015152	0.159091	0.371212	0.681818	0.954545	0.310606
0.47619	0.222222	0.301587	0.177419	0.403226	0.064516	0.031746	0.190476	0.428571	0.714286	0.952381	0.047619	0.253968	0.555556	0.809524	1	0.015873	0.222222	0.412698	0.68254	0.904762	0.142857	0	0.857143	0	0.129032	0	0.015873	0.031746	0.15873	0.619048	1	0	0	0	0	0	0.047619	0.269841	0.492063	0.730159	0.952381	0.31746	0.451613	0.047619	0.333333	0.460317	0.730159	0.904762	0.222222
0.434447	0.349614	0.215938	0.292453	0.190395	0.160377	0.001714	0.27078	0.520137	0.772065	1	0.005998	0.24593	0.507284	0.712939	0.999143	0.000857	0.191088	0.429306	0.731791	0.997429	0.651243	0.126821	0.221937	0.060034	0.066895	0.005146	0.000857	0.275921	0.497858	0.724079	1	0.007712	0.130249	0.379606	0.682948	0.968295	0.004284	0.264781	0.649529	0.786632	0.996572	0.311054	0.346484	0.003428	0.208226	0.463582	0.744644	0.997429	0.401885
0.327586	0.327586	0.344828	0.226087	0.26087	0.226087	0.017241	0.258621	0.491379	0.715517	0.982759	0.025862	0.163793	0.508621	0.741379	0.939655	0.008621	0.241379	0.474138	0.732759	1	0.215517	0.405172	0.37931	0.043478	0.06087	0.026087	0.008621	0.137931	0.37931	0.577586	1	0.077586	0.655172	0.758621	0.87931	0.982759	0.051724	0.224138	0.353448	0.491379	0.62931	0.474138	0.486957	0.068966	0.241379	0.474138	0.689655	0.965517	0.327586
0.375291	0.393939	0.230769	0.281214	0.165694	0.187865	0.003497	0.20979	0.446387	0.738928	1	0.002331	0.248252	0.509324	0.748252	0.987179	0.001166	0.332168	0.559441	0.754079	0.995338	0.486014	0.16317	0.350816	0.05951	0.087515	0.001167	0.001166	0.213287	0.441725	0.719114	1	0.003497	0.399767	0.614219	0.784382	0.924242	0.017483	0.270396	0.497669	0.744755	0.986014	0.351981	0.289382	0.002331	0.367133	0.55711	0.778555	0.987179	0.437063
0.436782	0.350575	0.212644	0.33526	0.156069	0.150289	0.017241	0.218391	0.494253	0.758621	1	0.011494	0.258621	0.488506	0.729885	0.971264	0.005747	0.229885	0.45977	0.683908	0.867816	0.574713	0.178161	0.247126	0.121387	0.052023	0.00578	0.005747	0.247126	0.465517	0.816092	1	0.022989	0.431034	0.591954	0.695402	0.867816	0.04023	0.166667	0.298851	0.551724	0.770115	0.33908	0.346821	0.022989	0.287356	0.482759	0.678161	0.856322	0.385057
0.403756	0.333333	0.262911	0.259434	0.254717	0.15566	0.014085	0.267606	0.492958	0.741784	1	0.00939	0.183099	0.408451	0.690141	0.995305	0.004695	0.319249	0.58216	0.779343	0.985915	0.488263	0.173709	0.338028	0.061321	0.070755	0.023585	0.004695	0.15493	0.516432	0.723005	1	0.230047	0.483568	0.638498	0.943662	0.99061	0.037559	0.328638	0.42723	0.737089	0.924883	0.460094	0.424528	0.018779	0.342723	0.502347	0.70892	0.985915	0.328638
0.349359	0.416667	0.233974	0.292135	0.144462	0.224719	0.004808	0.248397	0.49359	0.703526	0.995192	0.003205	0.233974	0.509615	0.759615	0.996795	0.001603	0.258013	0.490385	0.764423	1	0.612179	0.116987	0.270833	0.048154	0.057785	0	0.001603	0.232372	0.496795	0.735577	1	0.041667	0.262821	0.418269	0.589744	0.940705	0.016026	0.302885	0.525641	0.793269	0.985577	0.392628	0.382022	0.014423	0.270833	0.554487	0.783654	0.99359	0.405449
0.366038	0.320755	0.313208	0.265152	0.208333	0.204545	0.007547	0.264151	0.539623	0.754717	1	0.011321	0.203774	0.430189	0.701887	0.984906	0.003774	0.260377	0.471698	0.732075	0.981132	0.388679	0.090566	0.520755	0.034091	0.102273	0.003788	0.003774	0.09434	0.34717	0.74717	1	0.211321	0.777358	0.826415	0.849057	0.879245	0.109434	0.309434	0.49434	0.645283	0.988679	0.498113	0.363636	0.022642	0.279245	0.471698	0.698113	0.981132	0.335849
0.254464	0.428571	0.316964	0.188341	0.170404	0.242152	0.013393	0.330357	0.59375	0.78125	0.986607	0.008929	0.183036	0.415179	0.683036	0.950893	0.004464	0.227679	0.549107	0.772321	1	0.5	0.178571	0.321429	0.058296	0.085202	0.004484	0.004464	0.142857	0.330357	0.633929	1	0.026786	0.339286	0.5625	0.620536	0.9375	0.09375	0.495536	0.6875	0.870536	0.991071	0.459821	0.466368	0.022321	0.245536	0.473214	0.6875	0.991071	0.473214
0.30625	0.325	0.36875	0.176101	0.201258	0.27673	0.04375	0.26875	0.49375	0.725	0.975	0.0125	0.21875	0.425	0.7375	0.99375	0.00625	0.2375	0.50625	0.75	1	0.34375	0.025	0.63125	0.012579	0.075472	0.012579	0.00625	0.08125	0.3625	0.83125	1	0.0875	0.0875	0.09375	0.1	0.74375	0.13125	0.3125	0.5125	0.6875	0.93125	0.53125	0.339623	0.025	0.21875	0.50625	0.69375	0.9875	0.34375
0.314961	0.370079	0.314961	0.261905	0.222222	0.206349	0.015748	0.228346	0.456693	0.732283	1	0.007874	0.173228	0.488189	0.740157	0.992126	0.031496	0.267717	0.527559	0.80315	0.984252	0.393701	0.322835	0.283465	0.111111	0.063492	0.015873	0.007874	0.370079	0.559055	0.748031	1	0.023622	0.322835	0.511811	0.700787	0.952756	0.07874	0.141732	0.212598	0.779528	0.858268	0.472441	0.47619	0.031496	0.283465	0.566929	0.740157	0.968504	0.409449
0.383562	0.369863	0.246575	0.275862	0.186207	0.165517	0.020548	0.315068	0.60274	0.842466	1	0.013699	0.19863	0.458904	0.650685	0.979452	0.006849	0.191781	0.452055	0.69863	0.972603	0.5	0.150685	0.349315	0.075862	0.048276	0.02069	0.006849	0.30137	0.438356	0.630137	1	0.191781	0.445205	0.547945	0.657534	0.979452	0.075342	0.171233	0.678082	0.767123	0.856164	0.363014	0.386207	0.034247	0.19863	0.431507	0.657534	0.910959	0.376712
0.307246	0.408696	0.284058	0.211901	0.187228	0.226415	0.004348	0.292754	0.549275	0.755072	1	0.005797	0.168116	0.437681	0.743478	0.989855	0.001449	0.317391	0.53913	0.744928	0.992754	0.576812	0.14058	0.282609	0.05225	0.087083	0.002903	0.001449	0.215942	0.469565	0.798551	1	0.015942	0.486957	0.637681	0.715942	0.975362	0.062319	0.226087	0.410145	0.676812	0.965217	0.472464	0.444122	0.005797	0.27971	0.553623	0.747826	0.986957	0.417391
0.289238	0.39574	0.315022	0.242424	0.193042	0.250281	0.002242	0.269058	0.505605	0.76009	0.998879	0.004484	0.261211	0.51009	0.726457	1	0.001121	0.213004	0.475336	0.747758	0.997758	0.467489	0.241031	0.29148	0.102132	0.054994	0.003367	0.001121	0.221973	0.491031	0.713004	1	0.002242	0.183857	0.446188	0.819507	0.997758	0.005605	0.309417	0.568386	0.7287	0.991031	0.56278	0.399551	0.003363	0.254484	0.484305	0.745516	0.997758	0.423767
0.320388	0.383495	0.296117	0.253659	0.239024	0.214634	0.029126	0.26699	0.480583	0.728155	1	0.009709	0.199029	0.538835	0.868932	0.995146	0.004854	0.262136	0.456311	0.669903	0.864078	0.398058	0.446602	0.15534	0.126829	0.058537	0	0.004854	0.276699	0.558252	0.81068	1	0.019417	0.300971	0.480583	0.621359	0.859223	0.082524	0.116505	0.257282	0.917476	0.990291	0.412621	0.429268	0.024272	0.257282	0.441748	0.65534	0.864078	0.432039
0.321782	0.425743	0.252475	0.258706	0.149254	0.233831	0.029703	0.391089	0.544554	0.717822	0.970297	0.009901	0.212871	0.450495	0.792079	1	0.00495	0.128713	0.356436	0.688119	0.990099	0.430693	0.138614	0.430693	0.074627	0.044776	0.004975	0.00495	0.207921	0.39604	0.871287	1	0.014851	0.128713	0.29703	0.371287	0.89604	0.019802	0.470297	0.579208	0.712871	0.861386	0.39604	0.457711	0.019802	0.282178	0.405941	0.722772	0.980198	0.445545
0.383356	0.326057	0.290587	0.25	0.229508	0.173497	0.005457	0.236016	0.523874	0.793997	1	0.002729	0.249659	0.492497	0.731241	0.995907	0.001364	0.255116	0.457026	0.698499	0.997271	0.480218	0.060027	0.459754	0.02459	0.095628	0.010929	0.001364	0.244202	0.476126	0.806276	1	0.155525	0.321965	0.357435	0.854025	0.897681	0.00955	0.229195	0.515689	0.695771	0.986357	0.432469	0.423497	0.008186	0.276944	0.435198	0.658936	0.994543	0.342428
0.331019	0.354167	0.314815	0.213457	0.232019	0.218097	0.006944	0.226852	0.467593	0.770833	0.99537	0.00463	0.282407	0.50463	0.747685	0.997685	0.002315	0.231481	0.483796	0.722222	1	0.555556	0.24537	0.199074	0.083527	0.041763	0	0.002315	0.256944	0.49537	0.752315	1	0.016204	0.231481	0.400463	0.729167	0.988426	0.043981	0.266204	0.525463	0.696759	0.953704	0.444444	0.37587	0.011574	0.247685	0.497685	0.699074	0.988426	0.347222
0.394209	0.242762	0.363029	0.165179	0.319196	0.133929	0.01559	0.233853	0.523385	0.752784	1	0.011136	0.249443	0.438753	0.76392	0.982183	0.002227	0.23608	0.483296	0.732739	0.997773	0.405345	0.2049	0.389755	0.075893	0.080357	0.004464	0.002227	0.300668	0.530067	0.792873	1	0.004454	0.262806	0.496659	0.777283	0.971047	0.013363	0.198218	0.432071	0.706013	0.995546	0.554566	0.410714	0.004454	0.273942	0.481069	0.717149	0.997773	0.253898
0.376923	0.269231	0.353846	0.185328	0.285714	0.204633	0.007692	0.219231	0.461538	0.715385	0.992308	0.015385	0.273077	0.526923	0.753846	1	0.003846	0.265385	0.511538	0.75	0.980769	0.25	0.065385	0.684615	0.019305	0.104247	0.011583	0.003846	0.284615	0.696154	0.823077	1	0.711538	0.753846	0.792308	0.807692	0.919231	0.015385	0.207692	0.411538	0.603846	0.984615	0.492308	0.416988	0.011538	0.253846	0.488462	0.734615	0.965385	0.273077
0.371762	0.274611	0.353627	0.199741	0.300908	0.1738	0.007772	0.279793	0.541451	0.759067	0.998705	0.005181	0.220207	0.463731	0.705959	0.994819	0.001295	0.240933	0.492228	0.756477	1	0.467617	0.234456	0.297927	0.092088	0.058366	0.001297	0.001295	0.207254	0.431347	0.734456	1	0.042746	0.186528	0.436528	0.80829	0.967617	0.006477	0.331606	0.554404	0.713731	0.997409	0.572539	0.399481	0.003886	0.246114	0.487047	0.739637	0.996114	0.283679
0.31456	0.46978	0.215659	0.233838	0.169188	0.181568	0.004121	0.274725	0.524725	0.752747	1	0.002747	0.251374	0.471154	0.755495	0.997253	0.001374	0.230769	0.504121	0.718407	0.995879	0.678571	0.023352	0.298077	0.022008	0.055021	0	0.001374	0.299451	0.494505	0.725275	1	0.024725	0.255495	0.537088	0.726648	0.929945	0.063187	0.203297	0.506868	0.854396	0.989011	0.504121	0.404402	0.005495	0.243132	0.559066	0.718407	0.993132	0.48489
0.215517	0.543103	0.241379	0.208696	0.13913	0.252174	0.086207	0.267241	0.525862	0.62931	0.982759	0.017241	0.284483	0.508621	0.801724	1	0.008621	0.12069	0.362069	0.672414	0.965517	0.681034	0.224138	0.094828	0.104348	0.034783	0	0.008621	0.310345	0.543103	0.724138	1	0.094828	0.155172	0.353448	0.405172	0.810345	0.025862	0.034483	0.060345	0.956897	0.982759	0.387931	0.191304	0.025862	0.112069	0.327586	0.655172	0.965517	0.568966
0.398058	0.330097	0.271845	0.235294	0.176471	0.196078	0.029126	0.145631	0.330097	0.592233	0.970874	0.019417	0.359223	0.582524	0.796117	0.990291	0.009709	0.262136	0.514563	0.825243	1	0.368932	0.029126	0.601942	0.019608	0.098039	0	0.009709	0.378641	0.631068	0.776699	1	0.951456	0.951456	0.951456	0.961165	0.970874	0.029126	0.165049	0.38835	0.61165	0.883495	0.368932	0.411765	0.126214	0.300971	0.640777	0.796117	0.951456	0.300971
0.406204	0.355982	0.237814	0.281065	0.183432	0.173077	0.004431	0.264402	0.539143	0.788774	0.995569	0.002954	0.286558	0.586411	0.759232	1	0.001477	0.187592	0.373708	0.54062	0.998523	0.556869	0.144756	0.298375	0.050296	0.065089	0.011834	0.001477	0.361891	0.635155	0.799114	1	0.007386	0.096012	0.190547	0.435746	0.874446	0.115214	0.29099	0.412112	0.655835	0.994092	0.415066	0.352071	0.005908	0.193501	0.389956	0.595273	0.994092	0.385524
0.347107	0.318182	0.334711	0.215768	0.19917	0.240664	0.008264	0.22314	0.487603	0.719008	0.995868	0.016529	0.27686	0.545455	0.780992	0.979339	0.004132	0.247934	0.450413	0.714876	1	0.516529	0.330579	0.152893	0.13278	0.041494	0.016598	0.004132	0.264463	0.557851	0.818182	1	0.115702	0.285124	0.533058	0.731405	0.96281	0.008264	0.041322	0.099174	0.475207	0.987603	0.549587	0.390041	0.016529	0.31405	0.533058	0.780992	0.991736	0.285124
0.354571	0.385042	0.260388	0.266667	0.188889	0.208333	0.00831	0.299169	0.493075	0.736842	0.980609	0.00554	0.213296	0.501385	0.783934	1	0.00277	0.279778	0.495845	0.706371	0.98338	0.542936	0.290859	0.166205	0.088889	0.044444	0.005556	0.00277	0.177285	0.576177	0.792244	1	0.116343	0.238227	0.457064	0.747922	0.927978	0.310249	0.362881	0.493075	0.598338	0.980609	0.531856	0.311111	0.01108	0.240997	0.531856	0.745152	0.98892	0.398892
0.483221	0.278523	0.238255	0.228956	0.232323	0.141414	0.013423	0.197987	0.496644	0.761745	1	0.006711	0.248322	0.520134	0.795302	0.996644	0.003356	0.291946	0.479866	0.677852	0.939597	0.520134	0.134228	0.345638	0.047138	0.080808	0.013468	0.003356	0.157718	0.449664	0.738255	1	0.325503	0.456376	0.61745	0.674497	0.919463	0.013423	0.278523	0.503356	0.802013	0.95302	0.305369	0.296296	0.020134	0.318792	0.459732	0.66443	0.942953	0.338926
0.35443	0.386076	0.259494	0.299363	0.197452	0.203822	0.025316	0.183544	0.525316	0.746835	0.993671	0.056962	0.234177	0.405063	0.727848	1	0.006329	0.303797	0.531646	0.721519	0.93038	0.575949	0.189873	0.234177	0.076433	0.038217	0.012739	0.006329	0.14557	0.322785	0.468354	1	0.28481	0.481013	0.702532	0.778481	0.936709	0.031646	0.537975	0.594937	0.848101	0.974684	0.481013	0.343949	0.101266	0.310127	0.487342	0.71519	0.955696	0.360759
0.35082	0.321311	0.327869	0.226974	0.246711	0.213816	0.013115	0.209836	0.459016	0.721311	0.996721	0.022951	0.288525	0.508197	0.708197	0.980328	0.003279	0.242623	0.514754	0.780328	1	0.52459	0.285246	0.190164	0.111842	0.039474	0.013158	0.003279	0.245902	0.465574	0.767213	1	0.006557	0.304918	0.563934	0.72459	0.954098	0.039344	0.098361	0.501639	0.806557	0.996721	0.537705	0.388158	0.009836	0.337705	0.511475	0.770492	0.990164	0.318033
0.319319	0.415415	0.265265	0.226453	0.182365	0.194389	0.002002	0.247247	0.556557	0.790791	0.994995	0.003003	0.242242	0.444444	0.731732	0.997998	0.001001	0.248248	0.510511	0.713714	1	0.593594	0.052052	0.354354	0.034068	0.074148	0.006012	0.001001	0.301301	0.484484	0.78979	1	0.132132	0.4004	0.538539	0.774775	0.952953	0.038038	0.218218	0.513514	0.714715	0.992993	0.407407	0.380762	0.004004	0.245245	0.437437	0.705706	0.996997	0.428428
0.395973	0.298658	0.305369	0.259259	0.245791	0.20202	0.006711	0.181208	0.446309	0.731544	0.996644	0.010067	0.248322	0.47651	0.687919	1	0.003356	0.312081	0.573826	0.781879	0.983221	0.399329	0.171141	0.42953	0.06734	0.080808	0.006734	0.003356	0.258389	0.550336	0.744966	1	0.224832	0.392617	0.486577	0.671141	0.825503	0.040268	0.167785	0.372483	0.791946	0.973154	0.520134	0.363636	0.077181	0.291946	0.510067	0.724832	0.969799	0.318792
0.439535	0.32093	0.239535	0.261072	0.188811	0.181818	0.009302	0.25814	0.462791	0.748837	1	0.004651	0.181395	0.495349	0.723256	0.983721	0.002326	0.313953	0.54186	0.751163	0.953488	0.595349	0.15814	0.246512	0.072261	0.095571	0.002331	0.002326	0.197674	0.446512	0.755814	1	0.07907	0.506977	0.632558	0.772093	0.951163	0.016279	0.267442	0.372093	0.704651	0.990698	0.323256	0.344988	0.05814	0.27907	0.532558	0.723256	0.97907	0.330233
0.306306	0.441441	0.252252	0.257919	0.158371	0.262443	0.009009	0.27027	0.522523	0.743243	0.995495	0.013514	0.234234	0.468468	0.707207	1	0.004505	0.225225	0.527027	0.806306	0.981982	0.761261	0.126126	0.112613	0.049774	0.040724	0.004525	0.004505	0.297297	0.486486	0.702703	1	0.036036	0.509009	0.797297	0.837838	0.927928	0.045045	0.067568	0.112613	0.252252	0.981982	0.333333	0.334842	0.027027	0.234234	0.522523	0.797297	0.981982	0.495495
0.349372	0.332636	0.317992	0.234801	0.232704	0.192872	0.004184	0.177824	0.472803	0.723849	1	0.01046	0.330544	0.600418	0.834728	0.997908	0.002092	0.232218	0.439331	0.646444	0.972803	0.539749	0.123431	0.33682	0.052411	0.056604	0.002096	0.002092	0.320084	0.608787	0.834728	1	0.016736	0.23431	0.328452	0.650628	0.972803	0.006276	0.154812	0.399582	0.575314	0.799163	0.543933	0.343816	0.006276	0.286611	0.479079	0.73431	0.979079	0.368201
0.421818	0.287273	0.290909	0.222628	0.262774	0.171533	0.010909	0.272727	0.490909	0.763636	1	0.007273	0.174545	0.498182	0.734545	0.941818	0.003636	0.247273	0.494545	0.705455	0.981818	0.312727	0.254545	0.432727	0.076642	0.069343	0.010949	0.003636	0.138182	0.534545	0.767273	1	0.050909	0.141818	0.283636	0.781818	0.967273	0.018182	0.374545	0.501818	0.712727	0.92	0.465455	0.459854	0.010909	0.24	0.498182	0.72	0.970909	0.290909
0.375	0.291667	0.333333	0.197605	0.299401	0.209581	0.017857	0.25	0.52381	0.77381	1	0.029762	0.196429	0.428571	0.702381	0.958333	0.005952	0.279762	0.535714	0.755952	0.988095	0.404762	0.261905	0.333333	0.095808	0.05988	0.011976	0.005952	0.136905	0.404762	0.660714	1	0.089286	0.47619	0.720238	0.815476	0.892857	0.154762	0.25	0.505952	0.589286	0.982143	0.410714	0.431138	0.029762	0.279762	0.517857	0.702381	0.982143	0.27381
0.415842	0.277228	0.306931	0.24	0.23	0.2	0.029703	0.267327	0.544554	0.821782	1	0.059406	0.257426	0.485149	0.623762	0.960396	0.009901	0.118812	0.39604	0.693069	0.90099	0.485149	0.158416	0.356436	0.06	0.1	0	0.009901	0.19802	0.346535	0.633663	1	0.069307	0.09901	0.138614	0.673267	0.712871	0.267327	0.405941	0.762376	0.851485	0.970297	0.386139	0.36	0.059406	0.138614	0.455446	0.673267	0.90099	0.247525
0.405567	0.266402	0.328032	0.217131	0.292829	0.175299	0.005964	0.250497	0.469185	0.741551	0.998012	0.003976	0.220676	0.491054	0.72167	1	0.001988	0.282306	0.520875	0.753479	0.994036	0.377734	0.198807	0.423459	0.057769	0.073705	0.005976	0.001988	0.153082	0.353877	0.628231	1	0.097416	0.28827	0.375746	0.479125	0.779324	0.047714	0.427435	0.701789	0.842942	0.986083	0.485089	0.434263	0.007952	0.282306	0.500994	0.725646	0.992048	0.298211
0.337971	0.437101	0.224928	0.262761	0.166473	0.185615	0.002319	0.290435	0.536232	0.754783	0.998841	0.001159	0.201159	0.418551	0.713623	1	0.00058	0.31942	0.584348	0.766377	0.99942	0.683478	0.045217	0.271304	0.029002	0.056845	0.00232	0.00058	0.195362	0.413913	0.66087	1	0.008696	0.217971	0.312464	0.358261	0.678261	0.014493	0.53913	0.706667	0.903768	0.998841	0.388986	0.360789	0.008696	0.256232	0.569275	0.791884	0.99942	0.443478
0.364621	0.3213	0.314079	0.246377	0.257246	0.202899	0.01083	0.288809	0.498195	0.761733	1	0.00722	0.209386	0.527076	0.765343	0.981949	0.00361	0.220217	0.433213	0.696751	0.98556	0.285199	0.267148	0.447653	0.068841	0.061594	0.01087	0.00361	0.129964	0.451264	0.722022	1	0.028881	0.148014	0.314079	0.711191	0.99278	0.039711	0.407942	0.537906	0.750903	0.960289	0.472924	0.478261	0.025271	0.231047	0.527076	0.743682	0.98556	0.303249
0.282369	0.370523	0.347107	0.209655	0.201379	0.262069	0.008264	0.279614	0.506887	0.772727	0.998623	0.002755	0.230028	0.487603	0.758953	0.997245	0.001377	0.23416	0.49449	0.719008	1	0.374656	0.11708	0.508264	0.046897	0.093793	0.002759	0.001377	0.260331	0.545455	0.790634	1	0.006887	0.085399	0.252066	0.581267	0.805785	0.0427	0.287879	0.493113	0.754821	0.993113	0.57438	0.342069	0.009642	0.230028	0.509642	0.736915	0.980716	0.402204
0.341677	0.319149	0.339174	0.218045	0.25188	0.223058	0.002503	0.276596	0.516896	0.770964	1	0.005006	0.226533	0.466834	0.71965	0.993742	0.001252	0.242804	0.494368	0.744681	0.997497	0.47184	0.245307	0.282854	0.107769	0.055138	0.002506	0.001252	0.235294	0.491865	0.734668	1	0.038798	0.198999	0.419274	0.797247	0.997497	0.006258	0.315394	0.536921	0.772215	0.992491	0.569462	0.41604	0.003755	0.26408	0.476846	0.743429	0.997497	0.331665
0.449123	0.284211	0.266667	0.253521	0.232394	0.15493	0.007018	0.224561	0.494737	0.722807	0.992982	0.010526	0.245614	0.491228	0.761404	0.975439	0.003509	0.284211	0.508772	0.768421	1	0.421053	0.207018	0.37193	0.070423	0.077465	0	0.003509	0.249123	0.480702	0.701754	1	0.161404	0.333333	0.65614	0.789474	0.922807	0.017544	0.133333	0.491228	0.726316	0.992982	0.336842	0.302817	0.02807	0.305263	0.568421	0.761404	0.996491	0.34386
0.290909	0.384848	0.324242	0.203647	0.221884	0.221884	0.009091	0.242424	0.445455	0.736364	0.981818	0.012121	0.272727	0.478788	0.748485	0.99697	0.00303	0.221212	0.551515	0.760606	1	0.369697	0.160606	0.469697	0.045593	0.100304	0.00304	0.00303	0.215152	0.50303	0.745455	1	0.154545	0.284848	0.521212	0.70303	0.784848	0.015152	0.245455	0.487879	0.833333	0.990909	0.518182	0.401216	0.021212	0.236364	0.527273	0.69697	0.984848	0.381818
0.351156	0.375723	0.273121	0.267728	0.193922	0.195369	0.007225	0.192197	0.482659	0.734104	1	0.00578	0.291908	0.566474	0.819364	0.995665	0.001445	0.236994	0.465318	0.682081	0.998555	0.526012	0.137283	0.336705	0.050651	0.070912	0.004342	0.001445	0.16474	0.49711	0.867052	1	0.021676	0.346821	0.50289	0.621387	0.859827	0.004335	0.313584	0.495665	0.74422	0.945087	0.473988	0.335745	0.004335	0.264451	0.465318	0.682081	0.99422	0.398844
0.360444	0.391867	0.247689	0.261111	0.164815	0.216667	0.018484	0.232902	0.513863	0.735675	0.998152	0.003697	0.292052	0.504621	0.772643	0.994455	0.001848	0.195933	0.438078	0.720887	1	0.735675	0.110906	0.15342	0.064815	0.05	0.001852	0.001848	0.266174	0.48244	0.744917	1	0.005545	0.19963	0.608133	0.669131	0.863216	0.018484	0.12939	0.550832	0.946396	0.990758	0.380776	0.396296	0.007394	0.25878	0.55268	0.783734	0.992606	0.414048
0.323232	0.40404	0.272727	0.258883	0.172589	0.228426	0.035354	0.328283	0.555556	0.772727	1	0.010101	0.151515	0.414141	0.651515	0.994949	0.005051	0.242424	0.575758	0.762626	0.979798	0.585859	0.20202	0.212121	0.071066	0.050761	0	0.005051	0.222222	0.434343	0.606061	1	0.080808	0.191919	0.671717	0.823232	0.89899	0.343434	0.388889	0.646465	0.757576	0.954545	0.373737	0.467005	0.025253	0.242424	0.565657	0.757576	0.979798	0.409091
0.343137	0.367647	0.289216	0.275862	0.216749	0.211823	0.039216	0.294118	0.5	0.79902	0.990196	0.009804	0.230392	0.47549	0.72549	1	0.004902	0.171569	0.465686	0.661765	0.946078	0.421569	0.328431	0.25	0.068966	0.059113	0.009852	0.004902	0.132353	0.254902	0.534314	1	0.014706	0.333333	0.764706	0.857843	0.941176	0.063725	0.495098	0.578431	0.666667	0.985294	0.45098	0.413793	0.014706	0.313725	0.519608	0.745098	0.931373	0.387255
0.340426	0.326241	0.333333	0.25	0.207143	0.235714	0.014184	0.269504	0.475177	0.64539	0.957447	0.021277	0.212766	0.524823	0.77305	0.985816	0.007092	0.219858	0.468085	0.794326	1	0.411348	0.319149	0.269504	0.15	0.05	0.007143	0.007092	0.22695	0.546099	0.702128	1	0.198582	0.446809	0.609929	0.822695	0.992908	0.070922	0.12766	0.262411	0.326241	0.921986	0.489362	0.414286	0.035461	0.234043	0.496454	0.787234	0.992908	0.347518
0.360419	0.323722	0.315858	0.206037	0.254593	0.206037	0.002621	0.231979	0.516383	0.777195	1	0.007864	0.292267	0.503277	0.739187	0.993447	0.001311	0.229358	0.46789	0.712975	0.998689	0.504587	0.290957	0.204456	0.112861	0.044619	0.002625	0.001311	0.235911	0.441678	0.68152	1	0.048493	0.357798	0.551769	0.685452	0.865007	0.007864	0.134993	0.879423	0.933159	0.997379	0.495413	0.383202	0.005242	0.267366	0.491481	0.722149	0.993447	0.346003
0.257692	0.498077	0.244231	0.22158	0.132948	0.204239	0.021154	0.280769	0.488462	0.676923	0.994231	0.003846	0.201923	0.492308	0.767308	1	0.001923	0.284615	0.513462	0.775	0.998077	0.675	0.130769	0.194231	0.05395	0.026975	0.011561	0.001923	0.213462	0.582692	0.763462	1	0.007692	0.321154	0.455769	0.901923	0.996154	0.063462	0.236538	0.373077	0.544231	0.990385	0.551923	0.308285	0.005769	0.278846	0.525	0.705769	0.998077	0.526923
0.337017	0.359116	0.303867	0.266667	0.194444	0.2	0.01105	0.259669	0.497238	0.756906	1	0.033149	0.20442	0.469613	0.745856	0.977901	0.005525	0.265193	0.464088	0.690608	0.98895	0.486188	0.425414	0.088398	0.138889	0.05	0.005556	0.005525	0.281768	0.502762	0.762431	1	0.016575	0.18232	0.375691	0.679558	0.895028	0.524862	0.58011	0.61326	0.961326	0.98895	0.508287	0.366667	0.016575	0.20442	0.425414	0.690608	0.98895	0.392265
0.48125	0.275	0.24375	0.27044	0.238994	0.119497	0.01875	0.2375	0.51875	0.75625	1	0.0125	0.29375	0.54375	0.8	0.9875	0.00625	0.1625	0.4375	0.5625	0.95625	0.31875	0.175	0.50625	0.050314	0.075472	0.012579	0.00625	0.24375	0.4125	0.64375	1	0.025	0.0625	0.29375	0.375	0.575	0.1	0.4375	0.675	0.8	0.95625	0.4125	0.415094	0.025	0.1875	0.3875	0.55625	0.975	0.2375
0.374233	0.312883	0.312883	0.234568	0.234568	0.203704	0.042945	0.226994	0.546012	0.797546	0.993865	0.018405	0.269939	0.503067	0.717791	1	0.006135	0.196319	0.453988	0.705521	0.97546	0.392638	0.165644	0.441718	0.080247	0.104938	0.018519	0.006135	0.282209	0.564417	0.754601	1	0.018405	0.196319	0.263804	0.343558	0.760736	0.02454	0.380368	0.539877	0.840491	0.98773	0.607362	0.333333	0.01227	0.257669	0.478528	0.687117	0.97546	0.343558
0.435252	0.28777	0.276978	0.227437	0.245487	0.176895	0.010791	0.266187	0.543165	0.802158	1	0.007194	0.244604	0.47482	0.71223	0.978417	0.003597	0.219424	0.438849	0.726619	0.996403	0.543165	0.147482	0.309353	0.057762	0.086643	0.00722	0.003597	0.179856	0.489209	0.76259	1	0.151079	0.255396	0.316547	0.726619	0.902878	0.010791	0.338129	0.557554	0.661871	0.992806	0.284173	0.353791	0.039568	0.241007	0.370504	0.607914	0.985612	0.316547
0.346908	0.315234	0.337858	0.21148	0.238671	0.234139	0.003017	0.269985	0.552036	0.775264	0.996983	0.004525	0.199095	0.434389	0.707391	1	0.001508	0.28356	0.514329	0.745098	0.998492	0.411765	0.162896	0.425339	0.070997	0.070997	0.004532	0.001508	0.26546	0.496229	0.822021	1	0.003017	0.182504	0.377074	0.886878	0.998492	0.027149	0.248869	0.527903	0.671192	0.924585	0.544495	0.392749	0.004525	0.250377	0.475113	0.711916	0.998492	0.33635
0.230352	0.574526	0.195122	0.192673	0.093623	0.217096	0.004065	0.275068	0.392954	0.659892	1	0.006775	0.257453	0.51897	0.789973	0.998645	0.001355	0.178862	0.501355	0.752033	0.99729	0.5271	0.071816	0.401084	0.033921	0.058345	0.006784	0.001355	0.228997	0.542005	0.764228	1	0.004065	0.163957	0.449864	0.674797	0.960705	0.009485	0.273713	0.375339	0.758808	0.99729	0.47832	0.306649	0.00542	0.254743	0.626016	0.817073	0.99729	0.50813
0.358904	0.367123	0.273973	0.236264	0.21978	0.233516	0.008219	0.260274	0.536986	0.726027	0.967123	0.005479	0.273973	0.509589	0.772603	1	0.00274	0.208219	0.421918	0.693151	0.983562	0.517808	0.279452	0.20274	0.104396	0.043956	0.010989	0.00274	0.309589	0.512329	0.715068	1	0.035616	0.167123	0.29863	0.865753	0.986301	0.008219	0.432877	0.632877	0.772603	0.827397	0.435616	0.340659	0.010959	0.208219	0.356164	0.810959	0.989041	0.394521
0.417476	0.38835	0.194175	0.343137	0.147059	0.156863	0.048544	0.203883	0.436893	0.699029	0.980583	0.019417	0.271845	0.485437	0.796117	1	0.009709	0.320388	0.582524	0.728155	0.941748	0.223301	0.009709	0.76699	0.019608	0.058824	0	0.009709	0.048544	0.106796	0.718447	1	0.737864	0.737864	0.737864	0.737864	0.737864	0.126214	0.300971	0.524272	0.786408	0.980583	0.262136	0.392157	0.126214	0.359223	0.572816	0.68932	0.951456	0.436893
0.364706	0.308235	0.327059	0.209906	0.259434	0.186321	0.004706	0.244706	0.505882	0.734118	1	0.011765	0.211765	0.416471	0.769412	0.995294	0.002353	0.263529	0.508235	0.741176	0.997647	0.425882	0.167059	0.407059	0.061321	0.080189	0.004717	0.002353	0.141176	0.416471	0.738824	1	0.183529	0.381176	0.6	0.811765	0.931765	0.023529	0.282353	0.529412	0.724706	0.990588	0.569412	0.358491	0.009412	0.258824	0.470588	0.748235	0.992941	0.345882
0.387352	0.304348	0.3083	0.222222	0.238095	0.174603	0.011858	0.26087	0.505929	0.699605	0.972332	0.007905	0.245059	0.474308	0.750988	0.996047	0.003953	0.197628	0.517787	0.802372	1	0.407115	0.26087	0.332016	0.09127	0.059524	0.003968	0.003953	0.328063	0.525692	0.640316	1	0.011858	0.300395	0.743083	0.889328	0.988142	0.055336	0.150198	0.458498	0.667984	0.818182	0.41502	0.380952	0.011858	0.201581	0.399209	0.802372	0.988142	0.312253
0.322292	0.388541	0.289167	0.248208	0.194444	0.236559	0.002686	0.231871	0.451209	0.724261	0.993733	0.001791	0.234557	0.495971	0.733214	1	0.000895	0.29991	0.558639	0.784244	0.999105	0.57744	0.145031	0.277529	0.083333	0.068996	0.002688	0.000895	0.233662	0.519248	0.734109	1	0.025962	0.594449	0.711728	0.840645	0.999105	0.007162	0.185318	0.406446	0.574754	0.991047	0.489705	0.387097	0.007162	0.313339	0.576544	0.772605	0.997314	0.402865
0.472727	0.218182	0.309091	0.211009	0.366972	0.119266	0.018182	0.281818	0.545455	0.790909	1	0.027273	0.109091	0.372727	0.581818	0.990909	0.009091	0.263636	0.527273	0.763636	0.954545	0.381818	0.290909	0.327273	0.110092	0.055046	0.018349	0.009091	0.190909	0.536364	0.809091	1	0.036364	0.118182	0.418182	0.609091	0.9	0.2	0.272727	0.527273	0.763636	0.872727	0.463636	0.422018	0.036364	0.181818	0.490909	0.709091	0.909091	0.190909
0.309904	0.421725	0.268371	0.282051	0.163462	0.269231	0.009585	0.255591	0.501597	0.734824	1	0.00639	0.249201	0.485623	0.741214	0.990415	0.003195	0.239617	0.520767	0.753994	0.98722	0.488818	0.162939	0.348243	0.048077	0.067308	0.003205	0.003195	0.188498	0.386581	0.683706	1	0.162939	0.230032	0.517572	0.821086	0.907348	0.073482	0.300319	0.58147	0.785942	0.990415	0.412141	0.378205	0.031949	0.313099	0.603834	0.824281	0.990415	0.412141
0.37218	0.319549	0.308271	0.218868	0.230189	0.211321	0.007519	0.229323	0.522556	0.815789	1	0.011278	0.266917	0.484962	0.62406	0.996241	0.003759	0.18797	0.530075	0.75188	0.954887	0.552632	0.342105	0.105263	0.10566	0.015094	0	0.003759	0.285714	0.515038	0.721805	1	0.011278	0.131579	0.37218	0.676692	0.883459	0.236842	0.259398	0.928571	0.954887	0.981203	0.518797	0.354717	0.011278	0.24812	0.533835	0.714286	0.966165	0.330827
0.395722	0.315508	0.28877	0.241935	0.268817	0.123656	0.010695	0.294118	0.55615	0.786096	1	0.026738	0.160428	0.395722	0.727273	0.962567	0.005348	0.235294	0.518717	0.705882	0.994652	0.411765	0.085561	0.502674	0.05914	0.080645	0.005376	0.005348	0.197861	0.44385	0.684492	1	0.139037	0.176471	0.299465	0.320856	0.989305	0.032086	0.374332	0.566845	0.775401	0.967914	0.411765	0.397849	0.02139	0.165775	0.385027	0.657754	0.983957	0.347594
0.384615	0.438034	0.17735	0.351178	0.119914	0.139186	0.008547	0.241453	0.542735	0.799145	0.997863	0.004274	0.237179	0.459402	0.692308	1	0.002137	0.262821	0.514957	0.730769	0.976496	0.75	0.123932	0.126068	0.047109	0.055675	0.008565	0.002137	0.224359	0.440171	0.724359	1	0.044872	0.311966	0.730769	0.846154	0.978632	0.141026	0.482906	0.523504	0.653846	0.948718	0.344017	0.295503	0.047009	0.258547	0.491453	0.698718	0.980769	0.463675
0.359195	0.304598	0.336207	0.227666	0.239193	0.195965	0.017241	0.198276	0.465517	0.692529	0.997126	0.005747	0.247126	0.528736	0.775862	1	0.002874	0.264368	0.485632	0.747126	0.979885	0.347701	0.106322	0.545977	0.040346	0.080692	0.005764	0.002874	0.284483	0.471264	0.718391	1	0.393678	0.485632	0.738506	0.824713	0.933908	0.008621	0.206897	0.454023	0.706897	0.994253	0.534483	0.37464	0.008621	0.341954	0.551724	0.784483	0.991379	0.324713
0.38565	0.318386	0.295964	0.252252	0.247748	0.162162	0.017937	0.224215	0.502242	0.721973	1	0.008969	0.273543	0.430493	0.690583	0.950673	0.004484	0.210762	0.600897	0.798206	0.986547	0.506726	0.125561	0.367713	0.058559	0.058559	0.004505	0.004484	0.295964	0.421525	0.704036	1	0.080717	0.139013	0.609865	0.762332	0.932735	0.017937	0.201794	0.55157	0.793722	0.986547	0.497758	0.378378	0.026906	0.300448	0.533632	0.789238	0.986547	0.331839
0.28022	0.406593	0.313187	0.21547	0.198895	0.270718	0.06044	0.247253	0.5	0.791209	1	0.010989	0.258242	0.538462	0.703297	0.967033	0.005495	0.164835	0.428571	0.774725	0.994505	0.554945	0.417582	0.027473	0.127072	0.005525	0.005525	0.005495	0.357143	0.604396	0.741758	1	0.027473	0.17033	0.340659	0.824176	0.994505	0.428571	0.428571	0.434066	0.43956	0.450549	0.576923	0.364641	0.016484	0.21978	0.527473	0.747253	0.994505	0.368132
0.323232	0.373737	0.30303	0.233503	0.182741	0.243655	0.010101	0.227273	0.515152	0.80303	0.969697	0.10101	0.292929	0.520202	0.732323	0.994949	0.005051	0.151515	0.414141	0.671717	1	0.575758	0.161616	0.262626	0.055838	0.06599	0.015228	0.005051	0.313131	0.580808	0.828283	1	0.025253	0.060606	0.277778	0.343434	0.459596	0.080808	0.146465	0.570707	0.737374	0.893939	0.565657	0.324873	0.025253	0.20202	0.40404	0.616162	0.984848	0.348485
0.40625	0.260417	0.333333	0.162304	0.272251	0.172775	0.010417	0.260417	0.546875	0.755208	1	0.020833	0.208333	0.484375	0.765625	0.96875	0.005208	0.234375	0.473958	0.682292	0.989583	0.395833	0.411458	0.192708	0.146597	0.031414	0	0.005208	0.260417	0.604167	0.848958	1	0.015625	0.145833	0.453125	0.640625	0.953125	0.317708	0.359375	0.40625	0.786458	0.838542	0.4375	0.450262	0.03125	0.348958	0.479167	0.640625	0.942708	0.229167
0.56	0.24	0.2	0.306122	0.163265	0.102041	0.06	0.28	0.62	0.8	1	0.04	0.14	0.4	0.6	0.96	0.02	0.24	0.5	0.54	0.86	0.62	0.1	0.28	0.040816	0.081633	0	0.02	0.34	0.6	0.84	1	0.48	0.48	0.5	0.52	0.56	0.12	0.16	0.24	0.3	0.7	0.24	0.244898	0.24	0.44	0.5	0.56	0.86	0.28
0.448598	0.364486	0.186916	0.276995	0.150235	0.14554	0.014019	0.200935	0.457944	0.635514	1	0.009346	0.317757	0.556075	0.803738	0.995327	0.004673	0.242991	0.565421	0.813084	0.985981	0.593458	0.018692	0.38785	0.018779	0.037559	0	0.004673	0.341121	0.691589	0.841121	1	0.373832	0.373832	0.378505	0.873832	0.878505	0.065421	0.154206	0.266355	0.537383	0.668224	0.294393	0.356808	0.079439	0.247664	0.640187	0.836449	0.985981	0.406542
0.329365	0.39881	0.271825	0.272366	0.192843	0.182903	0.005952	0.230159	0.468254	0.755952	0.998016	0.019841	0.202381	0.448413	0.71627	1	0.001984	0.35119	0.559524	0.785714	0.996032	0.464286	0.073413	0.462302	0.027833	0.087475	0.003976	0.001984	0.130952	0.339286	0.666667	1	0.599206	0.662698	0.839286	0.89881	0.974206	0.007937	0.349206	0.511905	0.75	0.996032	0.376984	0.290258	0.003968	0.515873	0.678571	0.847222	0.996032	0.44246
0.294118	0.372549	0.333333	0.16	0.18	0.32	0.058824	0.215686	0.54902	0.823529	1	0.039216	0.196078	0.509804	0.72549	0.980392	0.019608	0.176471	0.372549	0.529412	0.941176	0.470588	0.27451	0.254902	0.08	0.12	0	0.019608	0.196078	0.509804	0.843137	1	0.058824	0.098039	0.313725	0.372549	0.45098	0.529412	0.568627	0.627451	0.686275	0.901961	0.45098	0.4	0.078431	0.294118	0.411765	0.588235	0.941176	0.431373
0.311828	0.365591	0.322581	0.23913	0.184783	0.195652	0.043011	0.16129	0.451613	0.774194	1	0.021505	0.268817	0.645161	0.817204	0.978495	0.010753	0.258065	0.408602	0.602151	0.892473	0.505376	0.333333	0.16129	0.108696	0.043478	0.021739	0.010753	0.247312	0.731183	0.870968	1	0.258065	0.365591	0.483871	0.591398	0.774194	0.032258	0.107527	0.150538	0.193548	0.655914	0.451613	0.304348	0.096774	0.290323	0.451613	0.634409	0.903226	0.387097
0.38833	0.327968	0.283702	0.274194	0.191532	0.197581	0.006036	0.217304	0.440644	0.696177	1	0.004024	0.245473	0.515091	0.746479	0.993964	0.002012	0.31992	0.561368	0.790744	0.991952	0.468813	0.092555	0.438632	0.042339	0.094758	0.006048	0.002012	0.158954	0.368209	0.661972	1	0.070423	0.593561	0.762575	0.889336	0.969819	0.004024	0.32998	0.535211	0.750503	0.991952	0.38833	0.342742	0.016097	0.484909	0.657948	0.841046	0.991952	0.358149
0.315018	0.43956	0.245421	0.294118	0.154412	0.1875	0.007326	0.21978	0.424908	0.695971	0.981685	0.010989	0.227106	0.567766	0.81685	1	0.003663	0.249084	0.472527	0.699634	0.989011	0.626374	0.113553	0.260073	0.036765	0.051471	0	0.003663	0.186813	0.520147	0.842491	1	0.054945	0.527473	0.630037	0.688645	0.791209	0.091575	0.289377	0.380952	0.575092	0.74359	0.347985	0.352941	0.018315	0.201465	0.538462	0.699634	0.989011	0.428571
0.422018	0.357798	0.220183	0.285714	0.142857	0.193548	0.041284	0.362385	0.619266	0.802752	1	0.009174	0.183486	0.481651	0.752294	0.995413	0.004587	0.169725	0.325688	0.550459	0.990826	0.555046	0.197248	0.247706	0.078341	0.059908	0.004608	0.004587	0.270642	0.522936	0.711009	1	0.050459	0.188073	0.348624	0.536697	0.963303	0.105505	0.288991	0.619266	0.779817	0.986239	0.311927	0.359447	0.03211	0.192661	0.348624	0.674312	0.963303	0.385321
0.403756	0.300469	0.295775	0.231132	0.245283	0.212264	0.014085	0.183099	0.42723	0.713615	1	0.037559	0.342723	0.57277	0.755869	0.981221	0.004695	0.211268	0.469484	0.737089	0.99061	0.342723	0.234742	0.422535	0.084906	0.09434	0.009434	0.004695	0.187793	0.366197	0.704225	1	0.098592	0.206573	0.591549	0.741784	0.962441	0.00939	0.328638	0.511737	0.788732	0.99061	0.455399	0.490566	0.00939	0.28169	0.521127	0.751174	0.99061	0.361502
0.342488	0.386107	0.271405	0.257282	0.156958	0.229773	0.008078	0.169628	0.523425	0.780291	0.998384	0.003231	0.232633	0.450727	0.712439	1	0.001616	0.340872	0.536349	0.772213	0.983845	0.457189	0.138934	0.403877	0.045307	0.07767	0.006472	0.001616	0.122779	0.277868	0.642973	1	0.226171	0.439418	0.58643	0.754443	0.875606	0.017771	0.384491	0.621971	0.783522	0.993538	0.46042	0.326861	0.011309	0.337641	0.512116	0.739903	0.990307	0.42811
0.37561	0.35122	0.273171	0.269608	0.254902	0.181373	0.014634	0.195122	0.419512	0.692683	1	0.009756	0.239024	0.502439	0.765854	0.995122	0.004878	0.356098	0.560976	0.77561	0.985366	0.502439	0.165854	0.331707	0.068627	0.088235	0.009804	0.004878	0.156098	0.521951	0.77561	1	0.219512	0.282927	0.619512	0.946341	0.990244	0.039024	0.341463	0.439024	0.721951	0.926829	0.458537	0.470588	0.019512	0.360976	0.517073	0.746341	0.985366	0.317073
0.330909	0.334545	0.334545	0.19708	0.229927	0.226277	0.010909	0.247273	0.501818	0.763636	1	0.007273	0.236364	0.487273	0.741818	0.970909	0.003636	0.265455	0.494545	0.723636	0.985455	0.370909	0.178182	0.450909	0.051095	0.10219	0	0.003636	0.181818	0.458182	0.705455	1	0.152727	0.305455	0.392727	0.603636	0.698182	0.007273	0.261818	0.509091	0.818182	0.992727	0.541818	0.394161	0.018182	0.247273	0.469091	0.669091	0.985455	0.341818
0.375	0.326923	0.298077	0.231884	0.26087	0.15942	0.009615	0.254808	0.509615	0.730769	0.985577	0.038462	0.230769	0.403846	0.663462	1	0.004808	0.206731	0.591346	0.75	0.990385	0.519231	0.153846	0.326923	0.086957	0.067633	0	0.004808	0.278846	0.408654	0.701923	1	0.009615	0.067308	0.591346	0.75	0.9375	0.096154	0.201923	0.567308	0.802885	0.995192	0.524038	0.376812	0.014423	0.346154	0.528846	0.759615	0.995192	0.336538
0.333333	0.373984	0.292683	0.270492	0.172131	0.262295	0.02439	0.219512	0.422764	0.682927	0.99187	0.03252	0.243902	0.552846	0.780488	1	0.00813	0.317073	0.528455	0.764228	0.98374	0.235772	0	0.764228	0	0.081967	0	0.00813	0.056911	0.227642	0.715447	1	0	0	0	0	0	0.065041	0.300813	0.495935	0.764228	0.97561	0.430894	0.459016	0.03252	0.325203	0.528455	0.739837	0.95122	0.349593
0.40081	0.323887	0.275304	0.284553	0.203252	0.182927	0.016194	0.230769	0.51417	0.753036	0.995951	0.008097	0.283401	0.510121	0.789474	1	0.004049	0.246964	0.449393	0.651822	0.983806	0.291498	0.109312	0.59919	0.03252	0.105691	0	0.004049	0.182186	0.34413	0.708502	1	0.469636	0.801619	0.846154	0.882591	0.910931	0.032389	0.275304	0.481781	0.647773	0.979757	0.493927	0.357724	0.032389	0.271255	0.469636	0.668016	0.983806	0.287449
0.324138	0.441379	0.234483	0.307958	0.16609	0.176471	0.010345	0.262069	0.524138	0.8	1	0.013793	0.303448	0.551724	0.793103	0.996552	0.003448	0.127586	0.372414	0.617241	0.934483	0.593103	0.310345	0.096552	0.100346	0.031142	0.00346	0.003448	0.324138	0.537931	0.775862	1	0.013793	0.12069	0.337931	0.603448	0.937931	0.224138	0.244828	0.834483	0.872414	0.931034	0.468966	0.32526	0.013793	0.186207	0.431034	0.62069	0.97931	0.472414
0.340426	0.357447	0.302128	0.264957	0.205128	0.24359	0.012766	0.26383	0.468085	0.761702	0.991489	0.008511	0.221277	0.519149	0.744681	1	0.004255	0.187234	0.523404	0.731915	0.995745	0.404255	0.097872	0.497872	0.029915	0.089744	0.021368	0.004255	0.238298	0.370213	0.676596	1	0.017021	0.178723	0.310638	0.689362	0.714894	0.080851	0.391489	0.53617	0.817021	0.974468	0.544681	0.410256	0.017021	0.280851	0.523404	0.697872	0.995745	0.370213
0.451282	0.317949	0.230769	0.319588	0.170103	0.154639	0.010256	0.312821	0.6	0.789744	1	0.015385	0.271795	0.502564	0.758974	0.989744	0.005128	0.184615	0.34359	0.512821	0.979487	0.74359	0.158974	0.097436	0.072165	0.051546	0.010309	0.005128	0.297436	0.6	0.805128	1	0.148718	0.220513	0.353846	0.420513	0.851282	0.05641	0.071795	0.138462	0.569231	0.641026	0.34359	0.268041	0.020513	0.169231	0.312821	0.507692	0.897436	0.374359
0.335	0.27	0.395	0.180905	0.261307	0.21608	0.015	0.19	0.435	0.75	0.98	0.02	0.285	0.56	0.78	1	0.005	0.24	0.475	0.72	0.975	0.47	0.185	0.345	0.070352	0.070352	0.030151	0.005	0.155	0.52	0.76	1	0.205	0.28	0.615	0.93	0.99	0.035	0.31	0.41	0.55	0.945	0.515	0.40201	0.02	0.325	0.515	0.765	0.985	0.175
0.364692	0.29036	0.344948	0.206977	0.265116	0.206977	0.003484	0.229965	0.516841	0.761905	0.998839	0.009292	0.2741	0.505226	0.747967	0.996516	0.001161	0.24158	0.490128	0.739837	1	0.377468	0.038328	0.584204	0.019767	0.084884	0.005814	0.001161	0.28223	0.458769	0.684088	1	0.278746	0.384437	0.653891	0.832753	0.911731	0.036005	0.210221	0.511034	0.772358	0.996516	0.545877	0.355814	0.026713	0.296167	0.508711	0.757259	0.996516	0.305459
0.355556	0.288889	0.355556	0.235955	0.292135	0.235955	0.077778	0.311111	0.566667	0.833333	1	0.022222	0.233333	0.455556	0.666667	0.933333	0.011111	0.177778	0.4	0.711111	0.977778	0.388889	0.466667	0.144444	0.101124	0.05618	0.011236	0.011111	0.088889	0.444444	0.866667	1	0.222222	0.355556	0.533333	0.666667	0.833333	0.1	0.122222	0.155556	0.766667	0.955556	0.444444	0.292135	0.088889	0.344444	0.477778	0.733333	0.955556	0.311111
0.404153	0.311502	0.284345	0.2256	0.2272	0.1904	0.003195	0.289137	0.485623	0.746006	1	0.004792	0.242812	0.541534	0.784345	0.998403	0.001597	0.194888	0.460064	0.677316	0.996805	0.560703	0.051118	0.388179	0.0384	0.0864	0.0064	0.001597	0.400958	0.565495	0.813099	1	0.100639	0.522364	0.714058	0.771565	0.950479	0.007987	0.134185	0.329073	0.635783	0.996805	0.365815	0.3936	0.01278	0.185304	0.482428	0.709265	0.996805	0.321086
0.371698	0.398113	0.230189	0.272899	0.15864	0.169027	0.003774	0.185849	0.551887	0.791509	1	0.007547	0.281132	0.44717	0.699057	0.99717	0.000943	0.279245	0.523585	0.754717	0.998113	0.674528	0.075472	0.25	0.036827	0.051936	0.002833	0.000943	0.239623	0.435849	0.685849	1	0.204717	0.50566	0.59717	0.733962	0.968868	0.00566	0.128302	0.662264	0.816981	0.993396	0.39717	0.381492	0.00566	0.285849	0.479245	0.703774	0.998113	0.4
0.332031	0.332031	0.335938	0.227451	0.235294	0.243137	0.011719	0.214844	0.4375	0.730469	0.988281	0.019531	0.292969	0.539062	0.71875	0.996094	0.003906	0.246094	0.5	0.761719	1	0.460938	0.292969	0.246094	0.12549	0.062745	0	0.003906	0.230469	0.441406	0.699219	1	0.164062	0.304688	0.503906	0.761719	0.941406	0.050781	0.125	0.53125	0.8125	0.988281	0.5	0.423529	0.015625	0.324219	0.511719	0.761719	0.992188	0.382812
0.353033	0.33437	0.312597	0.224299	0.23676	0.211838	0.004666	0.203733	0.466563	0.696734	0.998445	0.00311	0.283048	0.536547	0.765163	0.99689	0.001555	0.227061	0.517885	0.760498	1	0.407465	0.066874	0.525661	0.029595	0.104361	0.001558	0.001555	0.292379	0.55832	0.810264	1	0.060653	0.11042	0.744946	0.88647	0.970451	0.00311	0.242613	0.458787	0.645412	0.993779	0.556765	0.392523	0.007776	0.255054	0.544323	0.77916	0.992224	0.362364
0.41573	0.404494	0.179775	0.340909	0.170455	0.113636	0.022472	0.179775	0.370787	0.696629	1	0.05618	0.337079	0.516854	0.752809	0.988764	0.011236	0.202247	0.561798	0.741573	0.966292	0.157303	0	0.842697	0	0.068182	0	0.011236	0.033708	0.719101	0.752809	1	0	0	0	0	0	0.044944	0.235955	0.449438	0.685393	0.966292	0.325843	0.409091	0.067416	0.382022	0.550562	0.741573	0.966292	0.370787
0.384793	0.428571	0.186636	0.290993	0.124711	0.180139	0.009217	0.292627	0.490783	0.741935	0.993088	0.004608	0.202765	0.421659	0.718894	0.997696	0.002304	0.336406	0.645161	0.781106	1	0.677419	0.073733	0.248848	0.039261	0.080831	0.006928	0.002304	0.25576	0.426267	0.668203	1	0.043779	0.12212	0.18894	0.576037	0.836406	0.006912	0.605991	0.709677	0.78341	0.958525	0.366359	0.332564	0.071429	0.437788	0.580645	0.732719	0.974654	0.400922
0.390805	0.329502	0.279693	0.2	0.257692	0.176923	0.019157	0.256705	0.521073	0.789272	1	0.007663	0.295019	0.544061	0.785441	0.965517	0.003831	0.206897	0.436782	0.643678	0.996169	0.452107	0.164751	0.383142	0.05	0.065385	0.011538	0.003831	0.344828	0.670498	0.816092	1	0.122605	0.172414	0.318008	0.643678	0.704981	0.015326	0.229885	0.394636	0.555556	0.992337	0.40613	0.4	0.02682	0.214559	0.436782	0.609195	0.969349	0.360153
0.325905	0.384401	0.289694	0.23743	0.195531	0.203911	0.008357	0.21727	0.473538	0.763231	1	0.005571	0.231198	0.509749	0.724234	0.997214	0.002786	0.270195	0.493036	0.75766	0.986072	0.467967	0.239554	0.292479	0.086592	0.053073	0.00838	0.002786	0.181058	0.412256	0.632312	1	0.008357	0.228412	0.325905	0.506964	0.649025	0.094708	0.682451	0.810585	0.899721	0.986072	0.543175	0.324022	0.011142	0.24234	0.481894	0.690808	0.986072	0.395543
0.391304	0.467391	0.141304	0.351648	0.120879	0.131868	0.032609	0.173913	0.369565	0.652174	1	0.021739	0.326087	0.576087	0.793478	0.98913	0.01087	0.26087	0.380435	0.630435	0.858696	0.163043	0	0.836957	0	0.065934	0	0.01087	0.032609	0.695652	0.73913	1	0	0	0	0	0	0.054348	0.25	0.478261	0.684783	0.978261	0.282609	0.417582	0.076087	0.304348	0.543478	0.717391	0.945652	0.467391
0.512448	0.298755	0.188797	0.288981	0.178794	0.118503	0.010373	0.205394	0.441909	0.757261	1	0.004149	0.381743	0.607884	0.827801	0.997925	0.002075	0.288382	0.489627	0.624481	0.987552	0.510373	0.074689	0.414938	0.029106	0.04158	0.004158	0.002075	0.404564	0.672199	0.838174	1	0.3361	0.419087	0.560166	0.622407	0.989627	0.03112	0.145228	0.248963	0.512448	0.941909	0.284232	0.29106	0.018672	0.36722	0.506224	0.636929	0.991701	0.311203
0.32539	0.406049	0.268561	0.26055	0.16789	0.222018	0.001833	0.235564	0.489459	0.740605	1	0.003666	0.217232	0.468378	0.777269	0.999083	0.000917	0.313474	0.555454	0.730522	0.996334	0.569203	0.093492	0.337305	0.043119	0.081651	0.002752	0.000917	0.172319	0.394134	0.771769	1	0.021998	0.284143	0.385885	0.88451	0.996334	0.004583	0.497709	0.614115	0.735105	0.938588	0.509624	0.387156	0.006416	0.339138	0.560037	0.757104	0.996334	0.401467
0.27381	0.375	0.35119	0.209581	0.161677	0.251497	0.041667	0.214286	0.440476	0.64881	0.964286	0.011905	0.244048	0.5	0.821429	1	0.005952	0.267857	0.535714	0.72619	0.994048	0.35119	0.017857	0.630952	0.011976	0.083832	0.011976	0.005952	0.095238	0.339286	0.797619	1	0.077381	0.077381	0.077381	0.083333	0.720238	0.119048	0.303571	0.535714	0.744048	0.940476	0.52381	0.39521	0.02381	0.267857	0.535714	0.744048	0.994048	0.428571
0.371901	0.366391	0.261708	0.270718	0.179558	0.176796	0.008264	0.256198	0.451791	0.716253	1	0.00551	0.22314	0.495868	0.77686	0.997245	0.002755	0.247934	0.526171	0.752066	0.99449	0.37741	0.057851	0.564738	0.022099	0.093923	0	0.002755	0.269972	0.407713	0.633609	1	0.630854	0.85124	0.881543	0.895317	0.917355	0.060606	0.212121	0.528926	0.716253	0.99449	0.504132	0.331492	0.011019	0.206612	0.495868	0.705234	0.986226	0.349862
0.334928	0.365231	0.299841	0.209265	0.20607	0.196486	0.025518	0.259968	0.539075	0.755981	0.998405	0.00319	0.14992	0.425837	0.757576	0.99681	0.001595	0.339713	0.507177	0.716108	1	0.424242	0.132376	0.443381	0.043131	0.091054	0.004792	0.001595	0.204147	0.460925	0.744817	1	0.271132	0.475279	0.633174	0.77512	0.856459	0.004785	0.244019	0.454545	0.748006	0.984051	0.494418	0.341853	0.015949	0.339713	0.518341	0.720893	0.99681	0.398724
0.384123	0.357234	0.258643	0.258974	0.174359	0.180769	0.005122	0.245839	0.449424	0.745198	0.996159	0.003841	0.213828	0.448143	0.714469	1	0.00128	0.329065	0.615877	0.774648	0.997439	0.590269	0.117798	0.291933	0.042308	0.067949	0.008974	0.00128	0.215109	0.364917	0.587708	1	0.037132	0.582586	0.722151	0.854033	0.959027	0.028169	0.494238	0.65557	0.807939	0.996159	0.449424	0.364103	0.006402	0.330346	0.591549	0.796415	0.997439	0.409731
0.364641	0.290055	0.345304	0.185596	0.257618	0.202216	0.013812	0.20442	0.491713	0.712707	0.997238	0.041436	0.265193	0.541436	0.801105	0.991713	0.002762	0.232044	0.469613	0.709945	1	0.477901	0.151934	0.370166	0.077562	0.077562	0.01108	0.002762	0.160221	0.51105	0.825967	1	0.055249	0.383978	0.502762	0.853591	0.950276	0.005525	0.248619	0.455801	0.621547	0.848066	0.475138	0.398892	0.008287	0.301105	0.516575	0.781768	0.977901	0.262431
0.391555	0.301344	0.307102	0.230769	0.215385	0.198077	0.003839	0.337812	0.59309	0.823417	0.998081	0.011516	0.190019	0.433781	0.68714	1	0.001919	0.209213	0.426104	0.644914	0.990403	0.428023	0.143954	0.428023	0.046154	0.088462	0.007692	0.001919	0.241843	0.602687	0.873321	1	0.090211	0.289827	0.428023	0.587332	0.681382	0.017274	0.230326	0.466411	0.740883	0.988484	0.474088	0.319231	0.011516	0.1881	0.380038	0.600768	0.934741	0.347409
0.3375	0.370833	0.291667	0.23431	0.150628	0.225941	0.020833	0.233333	0.541667	0.783333	0.9875	0.016667	0.1875	0.408333	0.679167	0.995833	0.004167	0.308333	0.5375	0.729167	1	0.541667	0.2125	0.245833	0.062762	0.062762	0.012552	0.004167	0.15	0.2875	0.579167	1	0.008333	0.3875	0.591667	0.783333	0.995833	0.120833	0.441667	0.670833	0.8375	0.95	0.425	0.343096	0.0125	0.404167	0.575	0.7375	0.991667	0.408333
0.314425	0.463533	0.222042	0.26461	0.157468	0.194805	0.006483	0.222042	0.505673	0.748784	0.996759	0.003241	0.269044	0.47812	0.724473	1	0.001621	0.241491	0.547812	0.777958	0.998379	0.654781	0.029173	0.316045	0.025974	0.061688	0	0.001621	0.314425	0.518639	0.750405	1	0.009724	0.320908	0.52188	0.696921	0.820097	0.06483	0.19611	0.354943	0.893031	0.990276	0.486224	0.373377	0.009724	0.291734	0.606159	0.771475	0.983793	0.494327
0.386207	0.234483	0.37931	0.125	0.354167	0.208333	0.013793	0.248276	0.510345	0.751724	1	0.034483	0.331034	0.524138	0.793103	0.972414	0.006897	0.2	0.462069	0.668966	0.97931	0.234483	0	0.765517	0	0.097222	0	0.006897	0.255172	0.517241	0.703448	1	0	0	0	0	0	0.013793	0.227586	0.475862	0.751724	0.986207	0.517241	0.402778	0.027586	0.317241	0.572414	0.737931	0.97931	0.289655
0.431767	0.369128	0.199105	0.320628	0.183857	0.14574	0.008949	0.272931	0.512304	0.774049	1	0.004474	0.187919	0.42953	0.686801	0.975391	0.002237	0.304251	0.624161	0.753915	0.995526	0.753915	0.053691	0.192394	0.038117	0.05157	0.002242	0.002237	0.234899	0.427293	0.720358	1	0.053691	0.178971	0.199105	0.691275	0.832215	0.114094	0.608501	0.702461	0.760626	0.988814	0.373602	0.367713	0.013423	0.425056	0.58613	0.751678	0.995526	0.353468
0.315789	0.421053	0.263158	0.265152	0.159091	0.272727	0.022556	0.210526	0.466165	0.691729	0.977444	0.015038	0.263158	0.548872	0.736842	1	0.007519	0.165414	0.488722	0.81203	0.969925	0.488722	0.285714	0.225564	0.075758	0.045455	0	0.007519	0.203008	0.421053	0.601504	1	0.030075	0.150376	0.473684	0.646617	0.721805	0.24812	0.774436	0.834586	0.902256	0.962406	0.406015	0.575758	0.030075	0.255639	0.541353	0.789474	0.969925	0.451128
0.37	0.41	0.22	0.304348	0.197324	0.147157	0.006667	0.243333	0.45	0.703333	0.996667	0.01	0.213333	0.643333	0.823333	1	0.003333	0.253333	0.433333	0.586667	0.93	0.7	0.083333	0.216667	0.033445	0.040134	0	0.003333	0.306667	0.643333	0.816667	1	0.36	0.446667	0.466667	0.513333	0.613333	0.033333	0.223333	0.276667	0.423333	0.936667	0.28	0.32107	0.01	0.16	0.383333	0.513333	0.976667	0.396667
0.446429	0.267857	0.285714	0.306306	0.234234	0.153153	0.026786	0.241071	0.571429	0.8125	0.991071	0.035714	0.267857	0.491071	0.633929	1	0.008929	0.1875	0.4375	0.732143	0.982143	0.392857	0.267857	0.339286	0.063063	0.081081	0.027027	0.008929	0.098214	0.464286	0.696429	1	0.125	0.178571	0.526786	0.642857	0.919643	0.241071	0.3125	0.714286	0.794643	0.973214	0.4375	0.396396	0.107143	0.267857	0.526786	0.696429	0.982143	0.241071
0.375	0.350962	0.274038	0.280193	0.198068	0.241546	0.009615	0.230769	0.509615	0.730769	1	0.024038	0.307692	0.514423	0.783654	0.990385	0.004808	0.211538	0.432692	0.716346	0.980769	0.331731	0.283654	0.384615	0.10628	0.048309	0	0.004808	0.216346	0.471154	0.798077	1	0.014423	0.197115	0.403846	0.634615	0.990385	0.052885	0.322115	0.576923	0.730769	0.879808	0.451923	0.463768	0.019231	0.288462	0.514423	0.701923	0.980769	0.326923
0.352617	0.311295	0.336088	0.205517	0.230345	0.216552	0.002755	0.239669	0.480716	0.731405	0.991736	0.006887	0.257576	0.517906	0.754821	0.997245	0.001377	0.241047	0.508264	0.761708	1	0.42562	0.23416	0.34022	0.084138	0.062069	0.004138	0.001377	0.241047	0.428375	0.712121	1	0.11157	0.230028	0.487603	0.898072	0.998623	0.008264	0.322314	0.578512	0.750689	0.885675	0.539945	0.377931	0.00551	0.289256	0.512397	0.758953	0.995868	0.327824
0.336	0.402	0.262	0.241241	0.201201	0.2002	0.004	0.297	0.508	0.73	0.998	0.002	0.238	0.499	0.765	1	0.001	0.203	0.462	0.734	0.997	0.551	0.122	0.327	0.049049	0.073073	0.015015	0.001	0.266	0.52	0.774	1	0.002	0.149	0.307	0.536	0.921	0.04	0.289	0.57	0.752	0.951	0.413	0.364364	0.003	0.187	0.459	0.761	0.997	0.393
0.359667	0.334719	0.305613	0.227083	0.235417	0.216667	0.02079	0.243243	0.471933	0.742204	0.989605	0.004158	0.266112	0.588358	0.844075	1	0.002079	0.234927	0.449064	0.650728	0.991684	0.403326	0.367983	0.22869	0.095833	0.058333	0.020833	0.002079	0.22869	0.50104	0.735967	1	0.02079	0.261954	0.463617	0.663202	0.898129	0.039501	0.245322	0.596674	0.900208	0.991684	0.440748	0.4	0.006237	0.27027	0.474012	0.677755	0.991684	0.367983
0.319088	0.413105	0.267806	0.205714	0.182857	0.222857	0.017094	0.299145	0.501425	0.672365	0.980057	0.005698	0.262108	0.509972	0.792023	0.991453	0.002849	0.19943	0.444444	0.698006	1	0.723647	0.193732	0.082621	0.085714	0.034286	0.005714	0.002849	0.296296	0.561254	0.777778	1	0.079772	0.148148	0.267806	0.358974	0.917379	0.008547	0.45584	0.481481	0.940171	0.962963	0.452991	0.308571	0.014245	0.239316	0.501425	0.774929	0.982906	0.421652
0.356932	0.345133	0.297935	0.249631	0.208272	0.217134	0.004425	0.231563	0.49115	0.772861	0.998525	0.00885	0.264012	0.520649	0.735988	0.99705	0.001475	0.240413	0.476401	0.738938	1	0.449853	0.253687	0.29646	0.090103	0.063516	0.001477	0.001475	0.213864	0.433628	0.727139	1	0.032448	0.160767	0.421829	0.848083	0.958702	0.00885	0.399705	0.59292	0.747788	0.902655	0.533923	0.363368	0.00295	0.265487	0.498525	0.734513	0.958702	0.386431
0.29918	0.393443	0.307377	0.255144	0.160494	0.263374	0.028689	0.204918	0.512295	0.77459	1	0.008197	0.282787	0.528689	0.766393	0.987705	0.004098	0.229508	0.430328	0.639344	0.995902	0.368852	0.102459	0.528689	0.032922	0.074074	0	0.004098	0.168033	0.454918	0.778689	1	0.418033	0.75	0.77459	0.827869	0.864754	0.032787	0.237705	0.483607	0.622951	0.959016	0.483607	0.353909	0.012295	0.237705	0.487705	0.672131	0.995902	0.393443
0.388095	0.27381	0.338095	0.202864	0.264916	0.181384	0.007143	0.264286	0.535714	0.778571	0.997619	0.009524	0.2	0.45	0.678571	1	0.002381	0.254762	0.519048	0.769048	0.995238	0.338095	0.145238	0.516667	0.076372	0.100239	0.004773	0.002381	0.214286	0.545238	0.816667	1	0.085714	0.278571	0.521429	0.92381	0.997619	0.004762	0.252381	0.430952	0.697619	0.897619	0.585714	0.396181	0.011905	0.25	0.459524	0.680952	0.995238	0.278571
0.297578	0.396194	0.306228	0.202773	0.202773	0.228769	0.00346	0.235294	0.487889	0.733564	0.99827	0.00692	0.280277	0.589965	0.806228	1	0.00173	0.238754	0.422145	0.622837	0.99654	0.615917	0.114187	0.269896	0.062392	0.058925	0	0.00173	0.354671	0.636678	0.802768	1	0.1609	0.247405	0.432526	0.676471	0.967128	0.044983	0.141869	0.3391	0.49654	0.99481	0.529412	0.34662	0.00519	0.269896	0.489619	0.747405	0.99654	0.416955
0.334577	0.349502	0.31592	0.225405	0.224159	0.227895	0.007463	0.253731	0.493781	0.727612	1	0.004975	0.254975	0.504975	0.748756	0.987562	0.001244	0.235075	0.492537	0.762438	0.998756	0.466418	0.24005	0.293532	0.103362	0.053549	0.003736	0.001244	0.210199	0.46393	0.75	1	0.038557	0.207711	0.424129	0.794776	0.998756	0.006219	0.323383	0.54602	0.705224	0.992537	0.56592	0.400996	0.003731	0.263682	0.477612	0.737562	0.998756	0.369403
0.412969	0.290102	0.296928	0.219178	0.267123	0.174658	0.010239	0.283276	0.542662	0.819113	0.989761	0.006826	0.276451	0.508532	0.672355	1	0.003413	0.1843	0.40273	0.679181	0.993174	0.518771	0.1843	0.296928	0.061644	0.054795	0	0.003413	0.34471	0.713311	0.843003	1	0.03413	0.197952	0.273038	0.52901	0.703072	0.09215	0.16041	0.416382	0.491468	0.921502	0.457338	0.390411	0.017065	0.194539	0.423208	0.610922	0.952218	0.317406
0.410345	0.258621	0.331034	0.197232	0.276817	0.16263	0.006897	0.341379	0.544828	0.782759	1	0.010345	0.12069	0.37931	0.675862	0.910345	0.003448	0.248276	0.451724	0.765517	0.996552	0.396552	0.251724	0.351724	0.083045	0.062284	0	0.003448	0.203448	0.482759	0.631034	1	0.013793	0.17931	0.496552	0.775862	0.944828	0.055172	0.344828	0.544828	0.696552	0.993103	0.565517	0.366782	0.010345	0.210345	0.465517	0.713793	0.993103	0.265517
0.506369	0.288217	0.205414	0.299841	0.236045	0.118022	0.006369	0.246815	0.549363	0.765924	0.998408	0.003185	0.227707	0.452229	0.66879	0.992038	0.001592	0.261146	0.480892	0.742038	1	0.568471	0.082803	0.348726	0.031898	0.095694	0.00319	0.001592	0.187898	0.47293	0.753185	1	0.052548	0.237261	0.414013	0.468153	0.882166	0.020701	0.363057	0.578025	0.780255	0.984076	0.294586	0.299841	0.007962	0.270701	0.444268	0.652866	0.980892	0.363057
0.349593	0.284553	0.365854	0.196721	0.278689	0.221311	0.01626	0.333333	0.552846	0.747967	0.99187	0.056911	0.170732	0.430894	0.756098	1	0.00813	0.203252	0.414634	0.715447	0.98374	0.447154	0.463415	0.089431	0.098361	0.032787	0.016393	0.00813	0.162602	0.495935	0.699187	1	0.02439	0.300813	0.455285	0.707317	0.910569	0.113821	0.121951	0.886179	0.95935	0.98374	0.373984	0.52459	0.02439	0.284553	0.430894	0.731707	0.98374	0.260163
0.462963	0.240741	0.296296	0.169811	0.320755	0.132075	0.074074	0.314815	0.481481	0.648148	0.981481	0.037037	0.259259	0.425926	0.722222	0.907407	0.018519	0.166667	0.296296	0.777778	1	0.537037	0.462963	0	0.150943	0	0	0.018519	0.314815	0.481481	0.611111	1	0.092593	0.185185	0.407407	0.851852	0.981481	0	0	0	0	0	0.277778	0.45283	0.092593	0.166667	0.296296	0.666667	0.888889	0.240741
0.369697	0.377778	0.252525	0.251012	0.198381	0.192308	0.00404	0.242424	0.547475	0.761616	0.99798	0.006061	0.193939	0.460606	0.747475	1	0.00202	0.29697	0.474747	0.731313	0.987879	0.517172	0.080808	0.40202	0.038462	0.082996	0.010121	0.00202	0.157576	0.432323	0.777778	1	0.076768	0.276768	0.39596	0.60202	0.672727	0.008081	0.361616	0.541414	0.765657	0.989899	0.448485	0.417004	0.014141	0.270707	0.466667	0.668687	0.987879	0.448485
0.396552	0.327586	0.275862	0.313043	0.269565	0.156522	0.017241	0.275862	0.534483	0.706897	1	0.034483	0.232759	0.62931	0.844828	0.974138	0.008621	0.189655	0.396552	0.525862	0.87931	0.508621	0.241379	0.25	0.104348	0.052174	0	0.008621	0.318966	0.663793	0.87069	1	0.241379	0.465517	0.525862	0.706897	0.810345	0.025862	0.077586	0.189655	0.362069	0.431034	0.336207	0.330435	0.051724	0.163793	0.422414	0.698276	0.853448	0.344828
0.384615	0.306122	0.309262	0.218553	0.231132	0.187107	0.00314	0.288854	0.577708	0.839874	0.99843	0.00471	0.233909	0.480377	0.722135	0.993721	0.00157	0.21821	0.437991	0.660911	1	0.408163	0.128728	0.463108	0.048742	0.095912	0.004717	0.00157	0.22135	0.491366	0.769231	1	0.078493	0.246468	0.401884	0.572998	0.990581	0.018838	0.265306	0.55573	0.828885	0.971743	0.477237	0.352201	0.007849	0.213501	0.430141	0.624804	0.992151	0.33124
0.425508	0.314898	0.259594	0.263277	0.219209	0.170621	0.003386	0.251693	0.475169	0.725734	1	0.002257	0.256208	0.484199	0.730248	0.993228	0.001129	0.23702	0.571106	0.786682	0.998871	0.565463	0.164786	0.269752	0.077966	0.066667	0.014689	0.001129	0.209932	0.392777	0.642212	1	0.009029	0.247178	0.651242	0.839729	0.962754	0.022573	0.469526	0.626411	0.77991	0.997743	0.457111	0.433898	0.009029	0.27088	0.566591	0.758465	0.992099	0.323928
0.425676	0.256757	0.317568	0.183673	0.29932	0.129252	0.013514	0.25	0.412162	0.702703	1	0.087838	0.243243	0.547297	0.675676	0.986486	0.006757	0.202703	0.533784	0.790541	0.993243	0.391892	0.297297	0.310811	0.142857	0.061224	0.006803	0.006757	0.155405	0.5	0.736486	1	0.013514	0.243243	0.614865	0.885135	0.97973	0.060811	0.310811	0.391892	0.648649	0.824324	0.391892	0.47619	0.02027	0.202703	0.533784	0.743243	0.972973	0.304054
0.301994	0.384615	0.31339	0.225714	0.197143	0.222857	0.014245	0.293447	0.512821	0.752137	0.997151	0.005698	0.159544	0.430199	0.749288	1	0.002849	0.290598	0.541311	0.737892	0.988604	0.481481	0.518519	0	0.188571	0	0	0.002849	0.213675	0.48433	0.732194	1	0.039886	0.267806	0.507123	0.746439	0.985755	0	0	0	0	0	0.606838	0.382857	0.008547	0.264957	0.498575	0.720798	0.982906	0.452991
0.346961	0.331492	0.321547	0.221239	0.220133	0.210177	0.00221	0.275138	0.524862	0.78232	1	0.00663	0.232044	0.456354	0.717127	0.99558	0.001105	0.228729	0.496133	0.728177	0.981215	0.418785	0.128177	0.453039	0.054204	0.080752	0.001106	0.001105	0.245304	0.516022	0.770166	1	0.00221	0.342541	0.477348	0.643094	0.977901	0.014365	0.20663	0.509392	0.754696	0.994475	0.517127	0.391593	0.003315	0.257459	0.510497	0.708287	0.99337	0.358011
0.315305	0.402762	0.281933	0.240783	0.192396	0.248848	0.005754	0.243959	0.475259	0.713464	0.998849	0.002301	0.254315	0.508631	0.758343	1	0.001151	0.227848	0.517837	0.75374	0.997699	0.497123	0.228999	0.273878	0.102535	0.056452	0.003456	0.001151	0.216341	0.471807	0.741082	1	0.039125	0.180667	0.43153	0.812428	0.997699	0.006904	0.331415	0.542002	0.697353	0.991945	0.562716	0.40553	0.003452	0.247411	0.479862	0.733026	0.997699	0.432681
0.40625	0.291667	0.302083	0.242105	0.157895	0.221053	0.020833	0.25	0.541667	0.770833	0.958333	0.03125	0.28125	0.447917	0.635417	0.989583	0.010417	0.208333	0.427083	0.697917	1	0.46875	0.53125	0	0.168421	0	0	0.010417	0.3125	0.53125	0.802083	1	0.020833	0.197917	0.385417	0.6875	0.979167	0	0	0	0	0	0.302083	0.4	0.03125	0.208333	0.416667	0.697917	0.96875	0.291667
0.285955	0.465938	0.248108	0.237374	0.143098	0.207071	0.006728	0.222876	0.472666	0.79058	0.997477	0.001682	0.269975	0.485282	0.658537	0.998318	0.000841	0.262405	0.58032	0.813288	1	0.58873	0.052145	0.359125	0.030303	0.087542	0.005051	0.000841	0.213625	0.42725	0.6291	1	0.005887	0.158957	0.315391	0.476871	0.936081	0.002523	0.400336	0.742641	0.86291	0.981497	0.568545	0.316498	0.002523	0.283431	0.522288	0.728343	0.995795	0.46005
0.44	0.313333	0.246667	0.322148	0.194631	0.134228	0.013333	0.253333	0.52	0.78	1	0.026667	0.286667	0.593333	0.813333	0.953333	0.006667	0.153333	0.366667	0.54	0.946667	0.473333	0.233333	0.293333	0.100671	0.073826	0.006711	0.006667	0.266667	0.64	0.866667	1	0.026667	0.22	0.353333	0.686667	0.92	0.093333	0.16	0.473333	0.56	0.86	0.346667	0.268456	0.026667	0.173333	0.373333	0.54	0.946667	0.3
0.335404	0.322981	0.341615	0.25625	0.21875	0.25	0.012422	0.26087	0.434783	0.745342	0.993789	0.049689	0.248447	0.52795	0.73913	1	0.006211	0.186335	0.484472	0.732919	0.956522	0.354037	0.304348	0.341615	0.13125	0.04375	0.00625	0.006211	0.136646	0.52795	0.732919	1	0.012422	0.229814	0.57764	0.826087	0.925466	0.15528	0.304348	0.391304	0.614907	0.981366	0.372671	0.4625	0.018634	0.192547	0.496894	0.689441	0.919255	0.31677
0.390244	0.34334	0.266417	0.229323	0.24812	0.171053	0.013133	0.247655	0.478424	0.748593	0.994371	0.003752	0.292683	0.527205	0.742964	1	0.001876	0.212008	0.474672	0.756098	0.998124	0.562852	0.135084	0.302064	0.06015	0.067669	0.007519	0.001876	0.35272	0.555347	0.818011	1	0.015009	0.566604	0.688555	0.786116	0.981238	0.018762	0.140713	0.253283	0.472795	0.938086	0.35272	0.417293	0.009381	0.21576	0.529081	0.793621	0.979362	0.377111
0.330935	0.359712	0.309353	0.202899	0.217391	0.23913	0.014388	0.302158	0.503597	0.827338	0.985612	0.028777	0.280576	0.532374	0.719424	1	0.007194	0.194245	0.410072	0.647482	0.992806	0.345324	0.309353	0.345324	0.123188	0.07971	0.007246	0.007194	0.230216	0.453237	0.697842	1	0.021583	0.258993	0.489209	0.71223	0.992806	0.05036	0.129496	0.539568	0.798561	0.913669	0.539568	0.463768	0.021583	0.23741	0.489209	0.726619	0.978417	0.467626
0.385965	0.311404	0.302632	0.232796	0.237189	0.171303	0.004386	0.219298	0.495614	0.744152	1	0.002924	0.25731	0.517544	0.763158	0.998538	0.001462	0.248538	0.479532	0.745614	0.942982	0.535088	0.159357	0.305556	0.068814	0.089312	0.001464	0.001462	0.274854	0.538012	0.72076	1	0.096491	0.326023	0.592105	0.766082	0.921053	0.002924	0.121345	0.407895	0.744152	0.997076	0.488304	0.339678	0.020468	0.251462	0.457602	0.75731	0.99269	0.349415
0.330769	0.315385	0.353846	0.213368	0.249357	0.241645	0.005128	0.215385	0.446154	0.720513	0.994872	0.007692	0.325641	0.541026	0.766667	1	0.002564	0.217949	0.464103	0.725641	0.997436	0.34359	0.238462	0.417949	0.087404	0.066838	0	0.002564	0.284615	0.474359	0.794872	1	0.007692	0.189744	0.384615	0.528205	0.997436	0.048718	0.248718	0.584615	0.761538	0.974359	0.602564	0.416452	0.010256	0.269231	0.492308	0.730769	0.992308	0.312821
0.388235	0.329412	0.282353	0.25	0.214286	0.178571	0.070588	0.223529	0.517647	0.658824	1	0.058824	0.341176	0.623529	0.835294	0.988235	0.011765	0.152941	0.352941	0.6	0.894118	0.317647	0.305882	0.376471	0.119048	0.047619	0	0.011765	0.188235	0.435294	0.917647	1	0.023529	0.082353	0.235294	0.341176	0.494118	0.517647	0.6	0.694118	0.811765	0.905882	0.388235	0.47619	0.023529	0.211765	0.4	0.564706	0.929412	0.4
0.475936	0.304813	0.219251	0.311828	0.225806	0.11828	0.048128	0.304813	0.545455	0.721925	0.994652	0.016043	0.26738	0.55615	0.780749	0.973262	0.005348	0.13369	0.342246	0.459893	1	0.641711	0.251337	0.106952	0.075269	0.021505	0	0.005348	0.395722	0.663102	0.823529	1	0.074866	0.144385	0.224599	0.374332	0.994652	0.02139	0.042781	0.454545	0.481283	0.508021	0.417112	0.387097	0.016043	0.203209	0.427807	0.727273	0.946524	0.272727
0.408	0.344	0.248	0.290323	0.241935	0.177419	0.016	0.216	0.44	0.728	0.984	0.048	0.296	0.552	0.76	0.992	0.008	0.136	0.368	0.616	1	0.464	0.536	0	0.193548	0	0	0.008	0.272	0.528	0.76	1	0.04	0.224	0.488	0.712	0.992	0	0	0	0	0	0.416	0.322581	0.048	0.248	0.496	0.616	0.944	0.336
0.327273	0.409091	0.263636	0.302752	0.155963	0.211009	0.036364	0.209091	0.472727	0.690909	0.990909	0.018182	0.236364	0.518182	0.718182	0.981818	0.009091	0.245455	0.454545	0.763636	1	0.490909	0.418182	0.090909	0.110092	0.036697	0	0.009091	0.218182	0.527273	0.736364	1	0.036364	0.127273	0.463636	0.690909	0.954545	0.327273	0.336364	0.363636	0.381818	0.872727	0.518182	0.256881	0.036364	0.236364	0.463636	0.745455	0.972727	0.345455
0.396296	0.3	0.303704	0.200743	0.263941	0.200743	0.007407	0.211111	0.466667	0.737037	1	0.011111	0.248148	0.459259	0.733333	0.948148	0.003704	0.318519	0.533333	0.755556	0.996296	0.418519	0.111111	0.47037	0.070632	0.063197	0.003717	0.003704	0.114815	0.585185	0.840741	1	0.040741	0.422222	0.540741	0.696296	0.925926	0.107407	0.248148	0.366667	0.651852	0.992593	0.411111	0.446097	0.014815	0.418519	0.585185	0.77037	0.996296	0.266667
0.416404	0.343849	0.239748	0.262658	0.158228	0.199367	0.028391	0.277603	0.536278	0.760252	1	0.006309	0.201893	0.460568	0.769716	0.993691	0.003155	0.246057	0.44164	0.665615	0.921136	0.637224	0.135647	0.227129	0.056962	0.063291	0	0.003155	0.176656	0.495268	0.77918	1	0.15142	0.242902	0.353312	0.85489	0.940063	0.072555	0.328076	0.523659	0.624606	0.842271	0.274448	0.322785	0.044164	0.249211	0.378549	0.599369	0.917981	0.353312
0.328125	0.375	0.296875	0.215686	0.168627	0.215686	0.070312	0.300781	0.519531	0.792969	0.984375	0.007812	0.195312	0.488281	0.71875	0.996094	0.003906	0.191406	0.492188	0.6875	1	0.554688	0.246094	0.199219	0.070588	0.054902	0.007843	0.003906	0.195312	0.476562	0.804688	1	0.015625	0.527344	0.632812	0.757812	0.878906	0.019531	0.199219	0.253906	0.410156	0.972656	0.34375	0.4	0.023438	0.238281	0.5	0.691406	0.972656	0.375
0.355346	0.314465	0.330189	0.215748	0.247244	0.223622	0.003145	0.237421	0.528302	0.779874	0.990566	0.012579	0.207547	0.448113	0.677673	1	0.001572	0.287736	0.539308	0.773585	0.998428	0.383648	0.190252	0.426101	0.075591	0.07874	0.006299	0.001572	0.289308	0.517296	0.801887	1	0.006289	0.193396	0.356918	0.858491	0.996855	0.031447	0.267296	0.537736	0.666667	0.946541	0.566038	0.387402	0.007862	0.254717	0.471698	0.712264	0.998428	0.33805
0.413223	0.280992	0.305785	0.175	0.258333	0.175	0.016529	0.305785	0.520661	0.77686	0.966942	0.033058	0.181818	0.38843	0.743802	0.991736	0.008264	0.231405	0.495868	0.702479	1	0.404959	0.157025	0.438017	0.05	0.1	0	0.008264	0.181818	0.338843	0.735537	1	0.256198	0.280992	0.380165	0.421488	0.727273	0.07438	0.471074	0.578512	0.826446	0.942149	0.454545	0.35	0.041322	0.305785	0.512397	0.702479	0.92562	0.256198
0.43662	0.309859	0.253521	0.185714	0.257143	0.185714	0.028169	0.28169	0.492958	0.859155	1	0.084507	0.15493	0.535211	0.647887	0.915493	0.014085	0.197183	0.450704	0.56338	0.901408	0.478873	0.338028	0.183099	0.142857	0.028571	0	0.014085	0.112676	0.422535	0.633803	1	0.140845	0.211268	0.352113	0.492958	0.71831	0.788732	0.816901	0.859155	0.901408	0.957746	0.408451	0.428571	0.070423	0.239437	0.507042	0.619718	0.901408	0.338028
0.209644	0.561845	0.228512	0.178571	0.119748	0.245798	0.041929	0.381551	0.607966	0.750524	0.995807	0.006289	0.24109	0.454927	0.731656	0.997904	0.002096	0.184486	0.494759	0.767296	1	0.624738	0.083857	0.291405	0.069328	0.073529	0.002101	0.002096	0.266247	0.471698	0.761006	1	0.102725	0.316562	0.559748	0.645702	0.972746	0.033543	0.238994	0.505241	0.752621	0.937107	0.33543	0.508403	0.008386	0.165618	0.473795	0.725367	0.993711	0.559748
0.319277	0.457831	0.222892	0.278788	0.145455	0.187879	0.012048	0.192771	0.385542	0.716867	0.993976	0.018072	0.307229	0.626506	0.819277	1	0.006024	0.222892	0.415663	0.542169	0.915663	0.590361	0.114458	0.295181	0.054545	0.042424	0.006061	0.006024	0.210843	0.584337	0.813253	1	0.066265	0.144578	0.26506	0.885542	0.915663	0.03012	0.325301	0.39759	0.536145	0.674699	0.421687	0.363636	0.042169	0.222892	0.433735	0.596386	0.915663	0.445783
0.410072	0.29976	0.290168	0.235577	0.233173	0.173077	0.007194	0.242206	0.534772	0.726619	1	0.004796	0.297362	0.479616	0.800959	0.995204	0.002398	0.203837	0.434053	0.738609	0.997602	0.441247	0.206235	0.352518	0.0625	0.067308	0.009615	0.002398	0.266187	0.532374	0.688249	1	0.023981	0.170264	0.47482	0.714628	0.844125	0.071942	0.282974	0.407674	0.841727	0.992806	0.467626	0.399038	0.01199	0.213429	0.429257	0.760192	0.990408	0.29976
0.41339	0.331562	0.255048	0.253191	0.21383	0.161702	0.002125	0.255048	0.518597	0.760893	1	0.003188	0.217853	0.520723	0.749203	0.98831	0.001063	0.274176	0.463337	0.662062	0.997875	0.472901	0.077577	0.449522	0.034043	0.085106	0.008511	0.001063	0.157279	0.642933	0.77577	1	0.035069	0.223167	0.409139	0.81509	0.954304	0.003188	0.277365	0.461211	0.603613	0.996812	0.416578	0.33617	0.007439	0.274176	0.463337	0.636557	0.996812	0.35813
0.393939	0.328671	0.277389	0.268692	0.214953	0.221963	0.009324	0.291375	0.592075	0.801865	1	0.004662	0.184149	0.389277	0.636364	0.995338	0.002331	0.263403	0.501166	0.703963	0.97669	0.666667	0.086247	0.247086	0.10514	0.095794	0.016355	0.002331	0.25641	0.51049	0.752914	1	0.011655	0.18648	0.400932	0.699301	0.941725	0.027972	0.27972	0.4662	0.69697	0.969697	0.305361	0.504673	0.013986	0.270396	0.501166	0.724942	0.962704	0.324009
0.377939	0.298373	0.323689	0.21558	0.23913	0.20471	0.003617	0.218807	0.504521	0.768535	1	0.009042	0.253165	0.495479	0.748644	0.996383	0.001808	0.25859	0.479204	0.721519	0.998192	0.491863	0.133816	0.374322	0.059783	0.077899	0.001812	0.001808	0.218807	0.396022	0.696203	1	0.018083	0.40868	0.459313	0.576854	0.998192	0.065099	0.251356	0.638336	0.820976	0.981917	0.468354	0.384058	0.019892	0.282098	0.497288	0.725136	0.998192	0.334539
0.364379	0.349673	0.285948	0.216039	0.198036	0.225859	0.009804	0.19281	0.45098	0.727124	1	0.006536	0.267974	0.485294	0.735294	0.998366	0.001634	0.346405	0.54902	0.767974	0.99183	0.612745	0.199346	0.187908	0.086743	0.040917	0.008183	0.001634	0.230392	0.455882	0.699346	1	0.003268	0.220588	0.53268	0.76634	0.978758	0.062092	0.401961	0.573529	0.79085	0.955882	0.485294	0.356792	0.004902	0.218954	0.441176	0.736928	0.986928	0.362745
0.498559	0.270893	0.230548	0.242775	0.231214	0.138728	0.008646	0.216138	0.414986	0.752161	0.994236	0.005764	0.311239	0.527378	0.723343	0.991354	0.002882	0.308357	0.510086	0.731988	1	0.487032	0.069164	0.443804	0.040462	0.080925	0	0.002882	0.247839	0.420749	0.668588	1	0.011527	0.051873	0.423631	0.504323	0.59366	0.095101	0.345821	0.616715	0.778098	0.994236	0.291066	0.312139	0.014409	0.420749	0.585014	0.720461	0.997118	0.340058
0.438053	0.345133	0.216814	0.306667	0.204444	0.164444	0.017699	0.247788	0.517699	0.79646	1	0.00885	0.20354	0.49115	0.734513	0.982301	0.004425	0.300885	0.464602	0.676991	0.986726	0.672566	0.123894	0.20354	0.035556	0.062222	0	0.004425	0.20354	0.455752	0.778761	1	0.345133	0.464602	0.495575	0.663717	0.69469	0.017699	0.402655	0.575221	0.743363	0.986726	0.314159	0.328889	0.022124	0.362832	0.522124	0.668142	0.986726	0.384956
0.3675	0.28	0.3525	0.192982	0.303258	0.218045	0.005	0.2575	0.4725	0.73	0.9975	0.01	0.1725	0.4375	0.745	0.9925	0.0025	0.3025	0.54	0.7625	1	0.34	0.1	0.56	0.0401	0.105263	0.005013	0.0025	0.2175	0.3875	0.7175	1	0.055	0.1725	0.2025	0.2875	0.36	0.0175	0.41	0.6175	0.7825	0.9925	0.5375	0.441103	0.0125	0.2475	0.4425	0.6925	0.995	0.2925
0.358416	0.346535	0.29505	0.248016	0.202381	0.19246	0.005941	0.281188	0.562376	0.772277	1	0.00396	0.160396	0.374257	0.710891	0.994059	0.00198	0.338614	0.540594	0.746535	0.99802	0.485149	0.156436	0.358416	0.053571	0.069444	0.005952	0.00198	0.120792	0.334653	0.687129	1	0.172277	0.445545	0.615842	0.79802	0.914851	0.20198	0.368317	0.544554	0.776238	0.99604	0.522772	0.353175	0.013861	0.322772	0.512871	0.752475	0.99604	0.39604
0.201258	0.553459	0.245283	0.177215	0.082278	0.265823	0.018868	0.18239	0.27044	0.383648	1	0.012579	0.345912	0.540881	0.748428	0.987421	0.006289	0.257862	0.572327	0.767296	0.968553	0.754717	0.012579	0.232704	0.012658	0.025316	0	0.006289	0.433962	0.622642	0.811321	1	0.069182	0.069182	0.069182	0.069182	0.075472	0.113208	0.188679	0.245283	0.301887	0.36478	0.679245	0.291139	0.025157	0.358491	0.610063	0.786164	0.968553	0.54717
0.413408	0.385475	0.201117	0.292135	0.134831	0.191011	0.011173	0.206704	0.458101	0.73743	0.988827	0.01676	0.324022	0.530726	0.748603	0.994413	0.005587	0.27933	0.452514	0.709497	1	0.670391	0.027933	0.301676	0.011236	0.044944	0	0.005587	0.469274	0.664804	0.832402	1	0.636872	0.636872	0.642458	0.648045	0.659218	0.039106	0.106145	0.24581	0.318436	0.458101	0.329609	0.325843	0.055866	0.26257	0.452514	0.664804	0.972067	0.430168
0.344262	0.32377	0.331967	0.246914	0.263374	0.197531	0.02459	0.262295	0.491803	0.72541	0.995902	0.012295	0.217213	0.528689	0.762295	0.987705	0.004098	0.241803	0.446721	0.717213	1	0.471311	0.393443	0.135246	0.139918	0.032922	0	0.004098	0.209016	0.52459	0.729508	1	0.086066	0.42623	0.651639	0.815574	0.995902	0.016393	0.151639	0.184426	0.22541	0.463115	0.532787	0.36214	0.012295	0.27459	0.540984	0.75	0.991803	0.307377
0.30491	0.310078	0.385013	0.183938	0.243523	0.246114	0.01292	0.193798	0.49354	0.764858	1	0.005168	0.312661	0.498708	0.74677	0.981912	0.002584	0.22739	0.490956	0.731266	0.992248	0.356589	0.217054	0.426357	0.080311	0.069948	0.002591	0.002584	0.22739	0.459948	0.795866	1	0.02584	0.206718	0.397933	0.537468	0.901809	0.064599	0.320413	0.607235	0.775194	0.992248	0.594315	0.414508	0.020672	0.286822	0.50646	0.741602	0.992248	0.322997
0.277978	0.415162	0.306859	0.210145	0.166667	0.257246	0.025271	0.202166	0.512635	0.758123	0.99639	0.00722	0.245487	0.458484	0.700361	1	0.00361	0.281588	0.505415	0.740072	0.99278	0.422383	0.169675	0.407942	0.050725	0.072464	0	0.00361	0.184116	0.429603	0.700361	1	0.216606	0.314079	0.447653	0.65343	0.743682	0.054152	0.270758	0.537906	0.833935	0.99278	0.541516	0.376812	0.061372	0.285199	0.490975	0.689531	0.99278	0.436823
0.356265	0.298526	0.345209	0.204182	0.254613	0.236162	0.002457	0.283784	0.540541	0.760442	1	0.004914	0.237101	0.455774	0.732187	0.995086	0.001229	0.22973	0.495086	0.735872	0.997543	0.465602	0.248157	0.286241	0.098401	0.059041	0.00246	0.001229	0.210074	0.469287	0.749386	1	0.038084	0.202703	0.423833	0.793612	0.997543	0.006143	0.318182	0.556511	0.707617	0.9914	0.563882	0.398524	0.003686	0.271499	0.484029	0.743243	0.997543	0.332924
0.389655	0.310345	0.3	0.269896	0.217993	0.17301	0.013793	0.227586	0.489655	0.768966	1	0.010345	0.258621	0.531034	0.827586	0.996552	0.003448	0.237931	0.475862	0.665517	0.965517	0.503448	0.251724	0.244828	0.117647	0.062284	0	0.003448	0.265517	0.534483	0.831034	1	0.113793	0.237931	0.396552	0.610345	0.768966	0.02069	0.093103	0.524138	0.796552	0.92069	0.444828	0.373702	0.031034	0.265517	0.424138	0.634483	0.982759	0.355172
0.318681	0.412088	0.269231	0.287293	0.176796	0.259669	0.016484	0.274725	0.604396	0.796703	0.983516	0.010989	0.208791	0.43956	0.730769	1	0.005495	0.214286	0.467033	0.675824	0.950549	0.39011	0.406593	0.203297	0.154696	0.033149	0	0.005495	0.214286	0.571429	0.868132	1	0.016484	0.159341	0.472527	0.659341	0.961538	0.335165	0.379121	0.428571	0.796703	0.851648	0.461538	0.464088	0.032967	0.373626	0.510989	0.697802	0.950549	0.450549
0.452941	0.344118	0.202941	0.300885	0.159292	0.129794	0.008824	0.188235	0.479412	0.732353	0.994118	0.005882	0.255882	0.5	0.8	0.991176	0.002941	0.367647	0.532353	0.714706	1	0.485294	0.041176	0.473529	0.023599	0.070796	0	0.002941	0.191176	0.311765	0.605882	1	0.367647	0.373529	0.45	0.532353	0.847059	0.011765	0.405882	0.661765	0.779412	0.997059	0.285294	0.306785	0.017647	0.373529	0.535294	0.670588	0.997059	0.414706
0.353873	0.322183	0.323944	0.197531	0.238095	0.21164	0.007042	0.255282	0.554577	0.792254	1	0.003521	0.214789	0.514085	0.741197	0.992958	0.001761	0.257042	0.457746	0.68662	0.998239	0.477113	0.121479	0.401408	0.049383	0.067019	0.003527	0.001761	0.262324	0.522887	0.788732	1	0.146127	0.265845	0.642606	0.822183	0.996479	0.035211	0.209507	0.420775	0.65493	0.954225	0.558099	0.359788	0.012324	0.272887	0.463028	0.681338	0.998239	0.352113
0.321918	0.452055	0.226027	0.275862	0.17931	0.186207	0.020548	0.171233	0.472603	0.753425	0.993151	0.013699	0.205479	0.452055	0.691781	1	0.006849	0.383562	0.568493	0.746575	0.958904	0.363014	0.342466	0.294521	0.048276	0.048276	0.02069	0.006849	0.089041	0.191781	0.5	1	0.10274	0.69863	0.787671	0.883562	0.972603	0.226027	0.363014	0.465753	0.575342	0.691781	0.438356	0.372414	0.109589	0.349315	0.547945	0.767123	0.958904	0.452055
0.313514	0.335135	0.351351	0.222826	0.195652	0.255435	0.016216	0.216216	0.464865	0.821622	1	0.010811	0.227027	0.497297	0.686486	0.978378	0.005405	0.286486	0.491892	0.681081	0.994595	0.394595	0.156757	0.448649	0.054348	0.097826	0	0.005405	0.308108	0.621622	0.740541	1	0.016216	0.048649	0.281081	0.481081	0.654054	0.075676	0.259459	0.545946	0.821622	0.983784	0.605405	0.336957	0.021622	0.286486	0.497297	0.654054	0.994595	0.389189
0.379673	0.386682	0.233645	0.277193	0.192982	0.17076	0.003505	0.245327	0.495327	0.727804	0.994159	0.002336	0.323598	0.516355	0.752336	1	0.001168	0.160047	0.433411	0.766355	0.998832	0.51986	0.088785	0.391355	0.053801	0.065497	0.007018	0.001168	0.331776	0.523364	0.714953	1	0.004673	0.120327	0.338785	0.816589	0.96729	0.008178	0.232477	0.46028	0.76986	0.997664	0.348131	0.369591	0.005841	0.207944	0.442757	0.771028	0.997664	0.432243
0.373714	0.282286	0.344	0.21167	0.241419	0.207094	0.005714	0.234286	0.493714	0.772571	0.998857	0.002286	0.288	0.540571	0.768	0.992	0.001143	0.221714	0.461714	0.717714	1	0.304	0.027429	0.668571	0.016018	0.107551	0.002288	0.001143	0.308571	0.555429	0.806857	1	0.654857	0.739429	0.805714	0.980571	0.994286	0.003429	0.220571	0.449143	0.704	0.958857	0.530286	0.370709	0.003429	0.243429	0.48	0.717714	0.993143	0.317714
0.251908	0.446565	0.301527	0.245211	0.168582	0.237548	0.007634	0.244275	0.538168	0.824427	0.98855	0.01145	0.255725	0.484733	0.71374	0.996183	0.003817	0.21374	0.465649	0.736641	1	0.416031	0.148855	0.435115	0.061303	0.091954	0.007663	0.003817	0.198473	0.438931	0.664122	1	0.068702	0.164122	0.477099	0.660305	0.900763	0.026718	0.316794	0.591603	0.778626	0.965649	0.671756	0.314176	0.030534	0.236641	0.473282	0.70229	0.992366	0.484733
0.359712	0.266187	0.374101	0.176895	0.292419	0.209386	0.007194	0.258993	0.492806	0.776978	0.996403	0.017986	0.190647	0.482014	0.647482	1	0.003597	0.266187	0.553957	0.773381	0.989209	0.370504	0.223022	0.406475	0.079422	0.101083	0.00722	0.003597	0.251799	0.503597	0.798561	1	0.014388	0.071942	0.219424	0.705036	0.942446	0.158273	0.381295	0.535971	0.733813	0.992806	0.571942	0.382671	0.014388	0.226619	0.507194	0.71223	0.989209	0.294964
0.385542	0.39759	0.216867	0.292683	0.182927	0.195122	0.024096	0.144578	0.506024	0.795181	1	0.048193	0.277108	0.433735	0.662651	0.987952	0.012048	0.240964	0.518072	0.722892	0.951807	0.638554	0.048193	0.313253	0.036585	0.060976	0.036585	0.012048	0.313253	0.590361	0.746988	1	0.759036	0.759036	0.771084	0.843373	0.86747	0.072289	0.13253	0.216867	0.518072	0.891566	0.373494	0.439024	0.108434	0.253012	0.409639	0.722892	0.951807	0.409639
0.184971	0.375723	0.439306	0.142029	0.101449	0.347826	0.031792	0.306358	0.531792	0.690751	0.99422	0.008671	0.219653	0.514451	0.771676	1	0.00289	0.234104	0.436416	0.745665	0.968208	0.239884	0.060694	0.699422	0.02029	0.06087	0.002899	0.00289	0.283237	0.537572	0.696532	1	0.471098	0.482659	0.543353	0.627168	0.713873	0.026012	0.225434	0.413295	0.777457	0.991329	0.690751	0.173913	0.017341	0.248555	0.485549	0.754335	0.965318	0.352601
0.307888	0.413486	0.278626	0.257325	0.182166	0.221656	0.006361	0.217557	0.506361	0.737913	1	0.003817	0.250636	0.422392	0.69084	0.998728	0.001272	0.276081	0.581425	0.79771	0.997455	0.563613	0.204835	0.231552	0.086624	0.048408	0.007643	0.001272	0.273537	0.43257	0.711196	1	0.017812	0.1743	0.486005	0.669211	0.843511	0.033079	0.234097	0.725191	0.898219	0.994911	0.515267	0.35414	0.013995	0.272265	0.552163	0.79771	0.993639	0.399491
0.399038	0.259615	0.341346	0.178744	0.270531	0.15942	0.014423	0.278846	0.552885	0.774038	1	0.009615	0.182692	0.379808	0.625	0.975962	0.004808	0.274038	0.509615	0.759615	0.995192	0.394231	0.197115	0.408654	0.072464	0.082126	0.004831	0.004808	0.201923	0.375	0.75	1	0.024038	0.216346	0.317308	0.519231	0.802885	0.014423	0.413462	0.586538	0.850962	0.990385	0.538462	0.396135	0.009615	0.211538	0.451923	0.658654	0.995192	0.278846
0.338346	0.308271	0.353383	0.19697	0.287879	0.227273	0.015038	0.233083	0.503759	0.744361	0.984962	0.037594	0.360902	0.533835	0.699248	0.992481	0.007519	0.150376	0.37594	0.721805	1	0.338346	0.218045	0.443609	0.05303	0.068182	0.007576	0.007519	0.233083	0.646617	0.834586	1	0.022556	0.067669	0.150376	0.894737	0.954887	0.203008	0.323308	0.43609	0.609023	0.804511	0.496241	0.424242	0.030075	0.165414	0.37594	0.699248	0.969925	0.345865
0.307692	0.538462	0.153846	0.298701	0.090909	0.155844	0.102564	0.269231	0.448718	0.551282	0.871795	0.025641	0.282051	0.653846	0.846154	1	0.012821	0.076923	0.166667	0.384615	0.679487	0.525641	0	0.474359	0	0.051948	0	0.012821	0.602564	0.730769	0.858974	1	0	0	0	0	0	0.038462	0.141026	0.346154	0.461538	0.589744	0.269231	0.337662	0.064103	0.166667	0.346154	0.525641	0.705128	0.564103
0.395161	0.298387	0.306452	0.203252	0.235772	0.186992	0.024194	0.217742	0.459677	0.798387	0.991935	0.016129	0.241935	0.483871	0.669355	0.983871	0.008065	0.201613	0.516129	0.733871	1	0.629032	0.241935	0.129032	0.081301	0.03252	0.01626	0.008065	0.217742	0.548387	0.798387	1	0.056452	0.104839	0.532258	0.725806	0.959677	0.241935	0.266129	0.298387	0.427419	0.580645	0.451613	0.325203	0.056452	0.282258	0.524194	0.709677	0.975806	0.387097
0.190114	0.38403	0.425856	0.118321	0.164122	0.347328	0.007605	0.311787	0.452471	0.771863	0.988593	0.022814	0.228137	0.456274	0.756654	0.992395	0.003802	0.254753	0.551331	0.718631	1	0.288973	0.114068	0.596958	0.030534	0.091603	0.015267	0.003802	0.247148	0.380228	0.809886	1	0.148289	0.277567	0.307985	0.81749	0.961977	0.015209	0.224335	0.56654	0.722433	0.923954	0.642586	0.328244	0.015209	0.281369	0.551331	0.752852	0.977186	0.361217
0.267813	0.425061	0.307125	0.241379	0.199507	0.246305	0.004914	0.243243	0.503686	0.739558	1	0.012285	0.287469	0.542998	0.766585	0.992629	0.002457	0.223587	0.44226	0.717445	0.987715	0.592138	0.194103	0.213759	0.08867	0.054187	0.009852	0.002457	0.312039	0.555283	0.751843	1	0.007371	0.282555	0.714988	0.805897	0.987715	0.009828	0.103194	0.262899	0.496314	0.918919	0.690418	0.275862	0.007371	0.240786	0.432432	0.690418	0.987715	0.46683
0.33524	0.397025	0.267735	0.260023	0.207331	0.209622	0.003432	0.275744	0.51373	0.781465	0.998856	0.002288	0.2254	0.487414	0.724256	0.990847	0.001144	0.251716	0.497712	0.764302	1	0.508009	0.358124	0.133867	0.122566	0.033219	0.003436	0.001144	0.240275	0.494279	0.745995	1	0.064073	0.406178	0.577803	0.797483	0.996568	0.003432	0.056064	0.153318	0.229977	0.951945	0.437071	0.439863	0.004577	0.197941	0.447368	0.717391	0.995423	0.434783
0.278912	0.360544	0.360544	0.212329	0.171233	0.273973	0.040816	0.340136	0.462585	0.659864	0.918367	0.013605	0.22449	0.52381	0.761905	1	0.006803	0.129252	0.421769	0.755102	0.993197	0.387755	0.231293	0.380952	0.089041	0.075342	0.020548	0.006803	0.258503	0.489796	0.77551	1	0.142857	0.639456	0.727891	0.816327	0.972789	0.020408	0.108844	0.380952	0.578231	0.931973	0.496599	0.315068	0.027211	0.14966	0.544218	0.714286	0.979592	0.346939
0.335912	0.350276	0.313812	0.243363	0.204646	0.192478	0.003315	0.222099	0.437569	0.765746	1	0.00221	0.266298	0.487293	0.720442	0.99779	0.001105	0.245304	0.537017	0.754696	0.99337	0.474033	0.152486	0.373481	0.064159	0.075221	0.004425	0.001105	0.271823	0.432044	0.744751	1	0.007735	0.164641	0.583425	0.807735	0.970166	0.025414	0.342541	0.523757	0.759116	0.944751	0.577901	0.336283	0.00884	0.254144	0.538122	0.730387	0.99337	0.387845
0.168739	0.39254	0.438721	0.122776	0.117438	0.329181	0.007105	0.206039	0.433393	0.731794	1	0.01421	0.232682	0.492007	0.742451	0.989343	0.001776	0.268206	0.541741	0.77087	0.996448	0.328597	0.031972	0.639432	0.016014	0.080071	0.005338	0.001776	0.307282	0.48135	0.674956	1	0.300178	0.497336	0.529307	0.854352	0.872114	0.007105	0.206039	0.541741	0.777975	0.996448	0.708703	0.245552	0.017762	0.236234	0.48135	0.731794	0.996448	0.351687
0.30329	0.343348	0.353362	0.212034	0.217765	0.234957	0.002861	0.257511	0.527897	0.7897	0.998569	0.005722	0.238913	0.484979	0.733906	0.995708	0.001431	0.251788	0.48927	0.728183	1	0.433476	0.150215	0.416309	0.061605	0.081662	0.004298	0.001431	0.221745	0.459227	0.725322	1	0.088698	0.320458	0.519313	0.779685	0.944206	0.002861	0.236052	0.507868	0.756795	0.995708	0.632332	0.34384	0.004292	0.248927	0.48784	0.705293	0.997139	0.377682
0.230548	0.400576	0.368876	0.190751	0.138728	0.280347	0.014409	0.305476	0.550432	0.806916	0.997118	0.005764	0.262248	0.585014	0.832853	1	0.002882	0.195965	0.414986	0.590778	0.945245	0.524496	0.04611	0.429395	0.026012	0.066474	0.00289	0.002882	0.282421	0.67147	0.841499	1	0.291066	0.314121	0.325648	0.792507	0.948127	0.014409	0.184438	0.458213	0.582133	0.92219	0.634006	0.265896	0.008646	0.207493	0.466859	0.659942	0.979827	0.409222
0.264377	0.45607	0.279553	0.239808	0.159872	0.242206	0.002396	0.235623	0.478435	0.719649	0.998403	0.001597	0.273163	0.519968	0.782748	1	0.000799	0.218051	0.47524	0.736422	0.999201	0.59984	0.355431	0.044728	0.1255	0.018385	0.000799	0.000799	0.269968	0.544728	0.804313	1	0.00639	0.207668	0.391374	0.611022	0.974441	0.161342	0.778754	0.871406	0.888179	0.973642	0.420128	0.41247	0.003994	0.249201	0.516773	0.768371	0.991214	0.473642
0.468013	0.333333	0.198653	0.246622	0.192568	0.135135	0.006734	0.212121	0.457912	0.734007	0.996633	0.020202	0.272727	0.474747	0.717172	1	0.003367	0.377104	0.585859	0.804714	0.993266	0.599327	0.050505	0.350168	0.023649	0.084459	0.003378	0.003367	0.195286	0.447811	0.673401	1	0.491582	0.542088	0.555556	0.589226	0.801347	0.090909	0.316498	0.643098	0.882155	0.989899	0.181818	0.290541	0.013468	0.228956	0.585859	0.804714	0.976431	0.377104
0.265734	0.454545	0.27972	0.253521	0.169014	0.225352	0.048951	0.265734	0.48951	0.671329	0.993007	0.013986	0.188811	0.461538	0.734266	0.986014	0.006993	0.237762	0.51049	0.79021	1	0.237762	0	0.762238	0	0.112676	0	0.006993	0.307692	0.391608	0.573427	1	0	0	0	0	0	0.034965	0.223776	0.517483	0.776224	0.993007	0.468531	0.422535	0.020979	0.237762	0.496503	0.748252	0.972028	0.48951
0.182692	0.348558	0.46875	0.120482	0.180723	0.342169	0.007212	0.216346	0.512019	0.723558	1	0.004808	0.235577	0.509615	0.716346	0.990385	0.002404	0.264423	0.466346	0.764423	0.987981	0.377404	0.043269	0.579327	0.024096	0.077108	0	0.002404	0.100962	0.5	0.598558	1	0.03125	0.103365	0.182692	0.524038	0.677885	0.125	0.326923	0.612981	0.819712	0.992788	0.704327	0.226506	0.03125	0.271635	0.478365	0.764423	0.983173	0.34375
0.316456	0.376582	0.306962	0.2	0.187302	0.222222	0.063291	0.367089	0.53481	0.81962	0.996835	0.006329	0.202532	0.531646	0.724684	1	0.003165	0.21519	0.411392	0.696203	0.981013	0.509494	0.161392	0.329114	0.063492	0.057143	0.012698	0.003165	0.297468	0.56962	0.718354	1	0.022152	0.139241	0.189873	0.35443	0.743671	0.060127	0.329114	0.531646	0.863924	0.971519	0.490506	0.374603	0.015823	0.234177	0.436709	0.743671	0.984177	0.433544
0.275701	0.32243	0.401869	0.150235	0.234742	0.258216	0.009346	0.299065	0.61215	0.859813	0.990654	0.023364	0.228972	0.53271	0.696262	1	0.004673	0.219626	0.406542	0.649533	0.981308	0.481308	0.280374	0.238318	0.098592	0.070423	0.004695	0.004673	0.261682	0.546729	0.766355	1	0.280374	0.429907	0.635514	0.808411	0.985981	0.018692	0.107477	0.228972	0.462617	0.878505	0.518692	0.460094	0.018692	0.219626	0.453271	0.696262	0.981308	0.38785
0.350877	0.442982	0.20614	0.255507	0.162996	0.176211	0.026316	0.280702	0.52193	0.736842	1	0.008772	0.219298	0.491228	0.714912	0.991228	0.004386	0.153509	0.407895	0.815789	0.995614	0.605263	0.289474	0.105263	0.110132	0.030837	0.004405	0.004386	0.219298	0.486842	0.644737	1	0.263158	0.399123	0.70614	0.833333	0.995614	0.083333	0.105263	0.131579	0.473684	0.877193	0.302632	0.352423	0.013158	0.140351	0.355263	0.789474	0.995614	0.447368
0.167526	0.376289	0.456186	0.108527	0.129199	0.377261	0.005155	0.304124	0.515464	0.811856	0.997423	0.023196	0.283505	0.479381	0.744845	0.981959	0.002577	0.206186	0.484536	0.731959	1	0.157216	0	0.842784	0	0.072351	0	0.002577	0.39433	0.484536	0.747423	1	0	0	0	0	0	0.007732	0.237113	0.510309	0.744845	0.974227	0.835052	0.087855	0.010309	0.242268	0.505155	0.744845	0.969072	0.35567
0.363881	0.369272	0.266846	0.254054	0.251351	0.178378	0.005391	0.199461	0.479784	0.789757	1	0.008086	0.264151	0.487871	0.695418	0.973046	0.002695	0.226415	0.506739	0.74124	0.981132	0.315364	0.204852	0.479784	0.07027	0.054054	0	0.002695	0.363881	0.571429	0.743935	1	0.347709	0.493261	0.584906	0.706199	0.924528	0.013477	0.156334	0.28841	0.77628	0.994609	0.498652	0.378378	0.013477	0.336927	0.512129	0.706199	0.986523	0.407008
0.407104	0.382514	0.210383	0.293151	0.169863	0.156164	0.005464	0.325137	0.527322	0.73224	1	0.008197	0.273224	0.557377	0.797814	0.989071	0.002732	0.155738	0.322404	0.568306	0.997268	0.631148	0.20765	0.161202	0.09863	0.049315	0.010959	0.002732	0.31694	0.568306	0.770492	1	0.021858	0.114754	0.185792	0.409836	0.896175	0.243169	0.327869	0.625683	0.882514	0.994536	0.248634	0.268493	0.016393	0.136612	0.289617	0.47541	0.989071	0.409836
0.304511	0.359023	0.336466	0.199623	0.20339	0.224105	0.005639	0.159774	0.486842	0.729323	0.962406	0.003759	0.296992	0.522556	0.798872	1	0.00188	0.24812	0.477444	0.719925	0.996241	0.379699	0.150376	0.469925	0.056497	0.071563	0.003766	0.00188	0.306391	0.573308	0.808271	1	0.013158	0.302632	0.513158	0.68609	0.87594	0.026316	0.167293	0.426692	0.746241	0.994361	0.652256	0.361582	0.015038	0.274436	0.49812	0.757519	0.996241	0.366541
0.328638	0.295775	0.375587	0.212264	0.240566	0.221698	0.00939	0.244131	0.488263	0.802817	0.976526	0.014085	0.173709	0.41784	0.685446	0.943662	0.004695	0.267606	0.539906	0.769953	1	0.455399	0.164319	0.380282	0.061321	0.080189	0.004717	0.004695	0.230047	0.42723	0.676056	1	0.014085	0.15493	0.516432	0.779343	0.995305	0.070423	0.2723	0.478873	0.732394	0.971831	0.647887	0.367925	0.014085	0.239437	0.511737	0.699531	0.995305	0.366197
0.315436	0.36689	0.317673	0.2287	0.210762	0.273543	0.006711	0.199105	0.44519	0.677852	0.98434	0.004474	0.268456	0.510067	0.787472	0.991051	0.002237	0.257271	0.543624	0.760626	1	0.480984	0.217002	0.302013	0.080717	0.076233	0.004484	0.002237	0.192394	0.472036	0.796421	1	0.105145	0.304251	0.411633	0.814318	0.997763	0.024609	0.252796	0.52349	0.635347	0.894855	0.579418	0.390135	0.024609	0.277405	0.521253	0.760626	0.997763	0.39821
0.193684	0.589474	0.216842	0.200422	0.088608	0.238397	0.004211	0.330526	0.6	0.785263	1	0.008421	0.24	0.408421	0.698947	0.997895	0.002105	0.204211	0.614737	0.806316	0.995789	0.764211	0.229474	0.006316	0.105485	0.004219	0	0.002105	0.233684	0.425263	0.663158	1	0.006316	0.52	0.72	0.871579	0.997895	0.058947	0.058947	0.058947	0.061053	0.063158	0.456842	0.257384	0.006316	0.473684	0.637895	0.812632	0.997895	0.606316
0.325	0.345833	0.329167	0.213389	0.154812	0.242678	0.008333	0.154167	0.4375	0.6625	0.995833	0.025	0.275	0.516667	0.75	1	0.004167	0.316667	0.533333	0.783333	0.991667	0.533333	0.220833	0.245833	0.09205	0.066946	0.008368	0.004167	0.204167	0.4625	0.7625	1	0.025	0.166667	0.55	0.770833	0.991667	0.079167	0.325	0.3875	0.675	0.983333	0.470833	0.301255	0.025	0.316667	0.5375	0.7375	0.991667	0.370833
0.370833	0.3125	0.316667	0.209205	0.246862	0.192469	0.008333	0.216667	0.479167	0.745833	1	0.0125	0.275	0.491667	0.691667	0.9625	0.004167	0.25	0.5	0.791667	0.995833	0.191667	0.020833	0.7875	0.008368	0.058577	0.008368	0.004167	0.479167	0.7625	0.941667	1	0.883333	0.883333	0.8875	0.891667	0.991667	0.020833	0.220833	0.433333	0.666667	0.895833	0.5625	0.410042	0.020833	0.308333	0.508333	0.783333	0.991667	0.358333
0.538462	0.205128	0.25641	0.25	0.293103	0.12931	0.025641	0.222222	0.478632	0.692308	1	0.042735	0.299145	0.495726	0.777778	0.991453	0.008547	0.205128	0.444444	0.786325	0.974359	0.162393	0	0.837607	0	0.103448	0	0.008547	0.153846	0.504274	0.675214	1	0	0	0	0	0	0.034188	0.239316	0.470085	0.74359	0.974359	0.384615	0.517241	0.034188	0.230769	0.470085	0.786325	0.974359	0.264957
0.471264	0.172414	0.356322	0.093023	0.27907	0.139535	0.022989	0.195402	0.586207	0.781609	0.988506	0.218391	0.275862	0.333333	0.425287	0.862069	0.011494	0.183908	0.517241	0.724138	1	0.37931	0.08046	0.54023	0.011628	0.104651	0.034884	0.011494	0.229885	0.321839	0.712644	1	0.114943	0.114943	0.137931	0.632184	0.655172	0.045977	0.367816	0.505747	0.793103	0.931034	0.45977	0.418605	0.068966	0.229885	0.471264	0.666667	0.931034	0.137931
0.348365	0.335964	0.315671	0.225734	0.235892	0.21219	0.003382	0.259301	0.494927	0.726043	1	0.002255	0.208568	0.487035	0.759865	0.996618	0.001127	0.249154	0.53664	0.767756	0.997745	0.42841	0.142052	0.429538	0.047404	0.074492	0	0.001127	0.184893	0.419391	0.669673	1	0.006764	0.10372	0.245772	0.711387	0.877114	0.039459	0.396843	0.600902	0.824126	0.997745	0.534386	0.408578	0.007892	0.264938	0.54115	0.775648	0.997745	0.354002
0.314236	0.467882	0.217882	0.275413	0.158992	0.19722	0.002604	0.240451	0.469618	0.739583	0.997396	0.001736	0.282986	0.577257	0.769097	0.999132	0.000868	0.217014	0.414931	0.649306	1	0.904514	0.044271	0.051215	0.023458	0.023458	0.000869	0.000868	0.270833	0.498264	0.723958	1	0.042535	0.144097	0.864583	0.892361	0.944444	0.005208	0.021701	0.124132	0.922743	0.997396	0.162326	0.253692	0.003472	0.115451	0.303819	0.829861	0.99566	0.515625
0.352818	0.304802	0.34238	0.23431	0.246862	0.209205	0.008351	0.265136	0.494781	0.734864	0.997912	0.004175	0.22547	0.448852	0.707724	0.987474	0.002088	0.26096	0.542797	0.76618	1	0.384134	0.150313	0.465553	0.046025	0.079498	0.012552	0.002088	0.181628	0.379958	0.653445	1	0.025052	0.087683	0.31524	0.390397	0.876827	0.098121	0.463466	0.636743	0.826722	0.991649	0.517745	0.410042	0.014614	0.308977	0.551148	0.76618	0.991649	0.327766
0.311881	0.445545	0.242574	0.263682	0.134328	0.228856	0.009901	0.188119	0.460396	0.688119	0.975248	0.014851	0.272277	0.49505	0.777228	1	0.00495	0.227723	0.529703	0.727723	0.99505	0.371287	0.079208	0.549505	0.029851	0.109453	0	0.00495	0.257426	0.549505	0.772277	1	0.569307	0.712871	0.732673	0.950495	0.970297	0.049505	0.20297	0.405941	0.648515	0.886139	0.420792	0.39801	0.064356	0.346535	0.564356	0.737624	0.985149	0.420792
0.421053	0.324561	0.254386	0.283186	0.212389	0.115044	0.035088	0.236842	0.447368	0.710526	0.95614	0.026316	0.263158	0.535088	0.736842	1	0.008772	0.122807	0.464912	0.807018	0.991228	0.657895	0.052632	0.289474	0.053097	0.053097	0	0.008772	0.27193	0.447368	0.622807	1	0.114035	0.114035	0.131579	0.140351	0.570175	0.026316	0.087719	0.701754	0.77193	0.868421	0.429825	0.212389	0.04386	0.473684	0.649123	0.815789	0.991228	0.315789
0.378698	0.284024	0.337278	0.208333	0.27381	0.196429	0.011834	0.230769	0.514793	0.721893	1	0.035503	0.254438	0.43787	0.680473	0.994083	0.005917	0.272189	0.544379	0.775148	0.964497	0.455621	0.266272	0.278107	0.089286	0.053571	0.005952	0.005917	0.230769	0.455621	0.704142	1	0.017751	0.100592	0.414201	0.83432	0.976331	0.266272	0.331361	0.550296	0.745562	0.940828	0.550296	0.357143	0.017751	0.284024	0.420118	0.710059	0.970414	0.307692
0.366265	0.4	0.233735	0.297101	0.147343	0.181159	0.045783	0.250602	0.522892	0.722892	0.99759	0.004819	0.291566	0.636145	0.819277	0.995181	0.00241	0.192771	0.354217	0.571084	1	0.604819	0.146988	0.248193	0.038647	0.033816	0.004831	0.00241	0.33012	0.689157	0.840964	1	0.007229	0.118072	0.219277	0.349398	0.457831	0.016867	0.26988	0.525301	0.587952	0.913253	0.426506	0.371981	0.007229	0.166265	0.342169	0.587952	0.942169	0.404819
0.383966	0.367089	0.248945	0.292373	0.173729	0.169492	0.008439	0.28692	0.523207	0.755274	0.987342	0.016878	0.227848	0.421941	0.71308	1	0.004219	0.181435	0.506329	0.742616	0.991561	0.670886	0.194093	0.135021	0.038136	0.029661	0.004237	0.004219	0.236287	0.443038	0.611814	1	0.303797	0.632911	0.704641	0.767932	0.894515	0.008439	0.037975	0.07173	0.924051	0.978903	0.485232	0.355932	0.016878	0.223629	0.468354	0.746835	0.987342	0.367089
0.294118	0.352941	0.352941	0.206751	0.198312	0.248945	0.033613	0.327731	0.508403	0.735294	0.991597	0.008403	0.222689	0.436975	0.752101	0.995798	0.004202	0.201681	0.512605	0.743697	1	0.403361	0.008403	0.588235	0.008439	0.059072	0	0.004202	0.163866	0.394958	0.743697	1	0.37395	0.37395	0.37395	0.37395	0.378151	0.084034	0.306723	0.571429	0.823529	0.987395	0.542017	0.43038	0.016807	0.218487	0.478992	0.710084	0.983193	0.348739
0.303279	0.377049	0.319672	0.231405	0.190083	0.231405	0.016393	0.327869	0.565574	0.860656	1	0.02459	0.196721	0.45082	0.647541	0.983607	0.008197	0.155738	0.418033	0.696721	0.909836	0.54918	0.090164	0.360656	0.041322	0.090909	0.008264	0.008197	0.286885	0.434426	0.745902	1	0.598361	0.606557	0.704918	0.729508	0.786885	0.02459	0.106557	0.467213	0.590164	0.909836	0.409836	0.31405	0.02459	0.114754	0.385246	0.688525	0.909836	0.401639
0.334459	0.371622	0.293919	0.264407	0.2	0.216949	0.006757	0.256757	0.516892	0.766892	1	0.023649	0.246622	0.493243	0.719595	0.969595	0.003378	0.202703	0.445946	0.743243	0.993243	0.317568	0.206081	0.476351	0.081356	0.074576	0	0.003378	0.277027	0.493243	0.780405	1	0.094595	0.287162	0.513514	0.793919	0.989865	0.010135	0.182432	0.483108	0.733108	0.935811	0.530405	0.433898	0.02027	0.253378	0.503378	0.736486	0.989865	0.425676
0.32	0.333333	0.346667	0.169643	0.205357	0.245536	0.008889	0.351111	0.56	0.782222	0.995556	0.022222	0.155556	0.4	0.755556	1	0.004444	0.24	0.48	0.702222	0.982222	0.564444	0.186667	0.248889	0.071429	0.044643	0.008929	0.004444	0.293333	0.488889	0.813333	1	0.022222	0.44	0.582222	0.742222	0.933333	0.16	0.217778	0.346667	0.604444	0.8	0.457778	0.3125	0.026667	0.235556	0.475556	0.697778	0.986667	0.386667
0.407035	0.40201	0.190955	0.328283	0.181818	0.156566	0.015075	0.256281	0.472362	0.718593	1	0.01005	0.276382	0.59799	0.824121	0.98995	0.005025	0.140704	0.376884	0.633166	0.984925	0.160804	0	0.839196	0	0.090909	0	0.005025	0.221106	0.572864	0.81407	1	0	0	0	0	0	0.035176	0.256281	0.477387	0.713568	0.984925	0.331658	0.434343	0.035176	0.155779	0.442211	0.648241	0.984925	0.417085
0.322581	0.322581	0.354839	0.25	0.293478	0.163043	0.032258	0.193548	0.483871	0.698925	0.946237	0.021505	0.204301	0.462366	0.741935	0.967742	0.010753	0.258065	0.516129	0.72043	1	0.505376	0.236559	0.258065	0.108696	0.043478	0	0.010753	0.11828	0.301075	0.591398	1	0.139785	0.258065	0.677419	0.731183	0.989247	0.333333	0.387097	0.451613	0.83871	0.903226	0.430108	0.456522	0.129032	0.333333	0.548387	0.731183	0.978495	0.397849
0.175182	0.510949	0.313869	0.139706	0.051471	0.375	0.109489	0.306569	0.452555	0.744526	0.963504	0.014599	0.20438	0.437956	0.664234	0.992701	0.007299	0.233577	0.613139	0.80292	1	0.49635	0.094891	0.408759	0.044118	0.058824	0	0.007299	0.262774	0.430657	0.722628	1	0.021898	0.036496	0.182482	0.321168	0.350365	0.058394	0.459854	0.562044	0.80292	0.905109	0.591241	0.205882	0.029197	0.233577	0.540146	0.708029	0.985401	0.510949
0.371046	0.298054	0.3309	0.200974	0.257004	0.192448	0.00365	0.248175	0.508516	0.770073	0.997567	0.004866	0.233577	0.479319	0.733577	1	0.001217	0.26764	0.504866	0.734793	0.995134	0.289538	0.023114	0.687348	0.00609	0.079172	0.008526	0.001217	0.403893	0.639903	0.829684	1	0.3382	0.341849	0.424574	0.906326	0.958637	0.012165	0.201946	0.437956	0.698297	0.993917	0.467153	0.46285	0.004866	0.257908	0.502433	0.731144	0.995134	0.33455
0.292683	0.385366	0.321951	0.166667	0.20098	0.215686	0.009756	0.326829	0.604878	0.756098	1	0.019512	0.17561	0.414634	0.702439	0.97561	0.004878	0.258537	0.502439	0.770732	0.995122	0.409756	0.239024	0.35122	0.063725	0.093137	0.004902	0.004878	0.243902	0.546341	0.814634	1	0.02439	0.204878	0.273171	0.556098	0.995122	0.019512	0.356098	0.590244	0.721951	0.887805	0.502439	0.401961	0.02439	0.2	0.409756	0.64878	0.995122	0.409756
0.38257	0.293944	0.323486	0.189349	0.275148	0.186391	0.004431	0.221566	0.48449	0.747415	0.998523	0.005908	0.233383	0.487445	0.70901	0.986706	0.001477	0.271787	0.530281	0.778434	1	0.370753	0.053176	0.576071	0.022189	0.093195	0.007396	0.001477	0.1226	0.478582	0.60709	1	0.007386	0.225997	0.472674	0.59675	0.865583	0.033973	0.307238	0.610044	0.802068	0.997046	0.462334	0.473373	0.007386	0.261448	0.508124	0.751846	0.997046	0.302806
0.220472	0.472441	0.307087	0.238095	0.111111	0.277778	0.031496	0.220472	0.527559	0.669291	0.944882	0.015748	0.251969	0.472441	0.795276	1	0.007874	0.23622	0.496063	0.748031	0.984252	0.330709	0.330709	0.338583	0.111111	0.063492	0	0.007874	0.204724	0.409449	0.669291	1	0.149606	0.259843	0.574803	0.692913	0.80315	0.023622	0.094488	0.433071	0.889764	0.976378	0.582677	0.349206	0.023622	0.244094	0.503937	0.716535	0.96063	0.472441
0.287958	0.408377	0.303665	0.247368	0.226316	0.194737	0.026178	0.172775	0.350785	0.727749	0.994764	0.020942	0.319372	0.581152	0.811518	0.989529	0.005236	0.219895	0.471204	0.712042	1	0.570681	0.324607	0.104712	0.126316	0.042105	0	0.005236	0.26178	0.554974	0.832461	1	0.089005	0.371728	0.497382	0.670157	0.801047	0.026178	0.04712	0.125654	0.544503	0.963351	0.549738	0.336842	0.020942	0.267016	0.497382	0.649215	0.973822	0.418848
0.325301	0.277108	0.39759	0.146341	0.317073	0.243902	0.024096	0.349398	0.566265	0.783133	0.987952	0.048193	0.156627	0.337349	0.626506	0.86747	0.012048	0.168675	0.421687	0.686747	1	0.289157	0.313253	0.39759	0.073171	0.02439	0.04878	0.012048	0.433735	0.73494	0.807229	1	0.036145	0.518072	0.662651	0.903614	0.987952	0.060241	0.144578	0.240964	0.337349	0.578313	0.518072	0.439024	0.036145	0.144578	0.337349	0.614458	0.963855	0.373494
0.331839	0.426009	0.242152	0.306306	0.135135	0.243243	0.013453	0.304933	0.600897	0.762332	0.995516	0.008969	0.224215	0.399103	0.636771	0.973094	0.004484	0.246637	0.511211	0.775785	1	0.798206	0.06278	0.139013	0.054054	0.036036	0	0.004484	0.251121	0.484305	0.690583	1	0.493274	0.762332	0.793722	0.825112	0.96861	0.058296	0.161435	0.327354	0.910314	0.946188	0.264574	0.315315	0.044843	0.152466	0.730942	0.834081	0.986547	0.479821
0.33635	0.399698	0.263952	0.23565	0.199396	0.223565	0.004525	0.245852	0.455505	0.757164	0.998492	0.00905	0.297134	0.53092	0.751131	0.996983	0.001508	0.184012	0.490196	0.720965	1	0.568627	0.365008	0.066365	0.101208	0.022659	0.001511	0.001508	0.266968	0.464555	0.737557	1	0.048265	0.38009	0.568627	0.806938	0.998492	0.006033	0.021116	0.087481	0.193062	0.966817	0.60181	0.350453	0.006033	0.241327	0.550528	0.764706	0.996983	0.431373
0.212766	0.486322	0.300912	0.195122	0.115854	0.283537	0.009119	0.331307	0.513678	0.650456	0.993921	0.006079	0.176292	0.431611	0.729483	1	0.00304	0.340426	0.537994	0.778116	0.99696	0.346505	0.006079	0.647416	0.006098	0.073171	0	0.00304	0.155015	0.243161	0.513678	1	0.990881	0.990881	0.990881	0.990881	0.993921	0.039514	0.398176	0.607903	0.793313	0.972644	0.541033	0.256098	0.015198	0.349544	0.550152	0.756839	0.990881	0.49848
0.247525	0.29703	0.455446	0.16	0.19	0.3	0.039604	0.386139	0.554455	0.871287	1	0.049505	0.19802	0.584158	0.742574	0.950495	0.009901	0.158416	0.376238	0.633663	0.980198	0.188119	0	0.811881	0	0.06	0	0.009901	0.524752	0.574257	0.90099	1	0	0	0	0	0	0.029703	0.217822	0.425743	0.693069	0.960396	0.782178	0.2	0.029703	0.217822	0.435644	0.693069	0.980198	0.29703
0.288	0.38	0.332	0.176707	0.196787	0.257028	0.012	0.196	0.488	0.732	1	0.008	0.28	0.44	0.748	0.988	0.004	0.232	0.524	0.744	0.992	0.412	0.116	0.472	0.052209	0.108434	0.004016	0.004	0.172	0.544	0.772	1	0.028	0.128	0.28	0.704	0.856	0.06	0.304	0.5	0.752	0.98	0.632	0.337349	0.02	0.232	0.452	0.712	0.992	0.356
0.22	0.415	0.365	0.211055	0.135678	0.291457	0.015	0.18	0.4	0.725	1	0.01	0.17	0.46	0.7	0.99	0.005	0.345	0.565	0.785	0.985	0.36	0.105	0.535	0.035176	0.065327	0.005025	0.005	0.125	0.36	0.75	1	0.375	0.41	0.435	0.775	0.805	0.015	0.29	0.565	0.71	0.945	0.66	0.110553	0.02	0.385	0.575	0.775	0.94	0.44
0.098214	0.5	0.401786	0.081081	0.081081	0.387387	0.017857	0.107143	0.178571	0.428571	0.848214	0.026786	0.258929	0.446429	0.669643	0.973214	0.008929	0.330357	0.589286	0.839286	1	0.348214	0.053571	0.598214	0.018018	0.108108	0	0.008929	0.294643	0.392857	0.8125	1	0.026786	0.026786	0.044643	0.053571	0.071429	0.133929	0.267857	0.517857	0.678571	0.946429	0.660714	0.306306	0.026786	0.419643	0.616071	0.785714	0.973214	0.535714
0.298387	0.387097	0.314516	0.308943	0.162602	0.260163	0.024194	0.298387	0.532258	0.806452	0.983871	0.016129	0.241935	0.516129	0.758065	0.991935	0.008065	0.129032	0.403226	0.637097	1	0.362903	0.346774	0.290323	0.130081	0.03252	0	0.008065	0.225806	0.379032	0.604839	1	0.024194	0.129032	0.403226	0.524194	0.653226	0.330645	0.766129	0.83871	0.91129	0.983871	0.516129	0.308943	0.032258	0.25	0.395161	0.572581	0.943548	0.435484
0.266442	0.365936	0.367622	0.177365	0.180743	0.277027	0.003373	0.315346	0.55312	0.770658	0.993255	0.005059	0.242833	0.51602	0.768971	1	0.001686	0.236088	0.443508	0.706577	0.996627	0.241147	0.097808	0.661046	0.037162	0.064189	0.006757	0.001686	0.554806	0.662732	0.833052	1	0.573356	0.612142	0.688027	0.890388	0.937605	0.006745	0.182125	0.367622	0.543002	0.979764	0.657673	0.331081	0.011804	0.234401	0.456998	0.708263	0.971332	0.36425
0.342756	0.318021	0.339223	0.244681	0.212766	0.223404	0.007067	0.265018	0.530035	0.784452	1	0.010601	0.222615	0.473498	0.689046	0.964664	0.003534	0.240283	0.459364	0.742049	0.992933	0.45583	0.169611	0.374558	0.070922	0.078014	0.007092	0.003534	0.272085	0.519435	0.689046	1	0.017668	0.095406	0.155477	0.353357	0.600707	0.190813	0.409894	0.70318	0.826855	0.989399	0.600707	0.326241	0.010601	0.279152	0.484099	0.706714	0.989399	0.310954
0.327526	0.337979	0.334495	0.192308	0.244755	0.269231	0.020906	0.254355	0.501742	0.752613	1	0.010453	0.243902	0.491289	0.766551	0.996516	0.003484	0.236934	0.494774	0.696864	0.97561	0.439024	0.149826	0.41115	0.062937	0.06993	0	0.003484	0.170732	0.428571	0.71777	1	0.02439	0.226481	0.515679	0.721254	0.860627	0.083624	0.313589	0.498258	0.811847	0.982578	0.609756	0.41958	0.02439	0.25784	0.512195	0.71777	0.989547	0.358885
0.391447	0.332237	0.276316	0.245267	0.230453	0.171193	0.004112	0.263158	0.555921	0.820724	0.997533	0.001645	0.266447	0.476974	0.712171	0.999178	0.000822	0.206414	0.464638	0.666118	1	0.458882	0.111842	0.429276	0.041975	0.069959	0.002469	0.000822	0.259868	0.435033	0.683388	1	0.007401	0.095395	0.495888	0.604441	0.654605	0.015625	0.241776	0.669408	0.851974	0.989309	0.430921	0.353909	0.003289	0.245066	0.470395	0.629934	0.996711	0.349507
0.266667	0.438095	0.295238	0.192308	0.144231	0.192308	0.085714	0.238095	0.561905	0.790476	1	0.047619	0.171429	0.457143	0.714286	0.952381	0.009524	0.314286	0.47619	0.72381	0.961905	0.457143	0.180952	0.361905	0.086538	0.067308	0.009615	0.009524	0.152381	0.285714	0.695238	1	0.019048	0.047619	0.32381	0.72381	0.952381	0.409524	0.485714	0.609524	0.809524	0.933333	0.504762	0.346154	0.019048	0.342857	0.495238	0.72381	0.961905	0.428571
0.345865	0.353383	0.300752	0.241509	0.218868	0.230189	0.026316	0.255639	0.484962	0.744361	0.992481	0.007519	0.240602	0.466165	0.733083	1	0.003759	0.221805	0.518797	0.759398	0.988722	0.37594	0.240602	0.383459	0.10566	0.083019	0.007547	0.003759	0.240602	0.469925	0.703008	1	0.015038	0.406015	0.601504	0.68797	0.992481	0.056391	0.25188	0.5	0.838346	0.966165	0.522556	0.445283	0.015038	0.206767	0.552632	0.759398	0.996241	0.398496
0.430769	0.265934	0.303297	0.248899	0.288546	0.167401	0.008791	0.318681	0.534066	0.775824	0.995604	0.004396	0.213187	0.472527	0.734066	1	0.002198	0.202198	0.461538	0.727473	0.997802	0.123077	0.004396	0.872527	0.002203	0.050661	0.002203	0.002198	0.052747	0.145055	0.230769	1	0.23956	0.23956	0.23956	0.23956	0.241758	0.024176	0.338462	0.556044	0.775824	0.995604	0.356044	0.511013	0.013187	0.182418	0.382418	0.70989	0.997802	0.287912
0.359903	0.304348	0.335749	0.227603	0.266344	0.198547	0.004831	0.268116	0.47343	0.7657	0.995169	0.007246	0.236715	0.533816	0.724638	0.992754	0.002415	0.243961	0.490338	0.756039	1	0.379227	0.193237	0.427536	0.082324	0.082324	0.004843	0.002415	0.198068	0.405797	0.693237	1	0.099034	0.251208	0.601449	0.792271	0.966184	0.043478	0.350242	0.516908	0.753623	0.995169	0.567633	0.387409	0.009662	0.258454	0.468599	0.707729	0.997585	0.328502
0.516129	0.293011	0.19086	0.274933	0.234501	0.102426	0.005376	0.204301	0.413978	0.688172	1	0.016129	0.266129	0.545699	0.819892	0.997312	0.002688	0.403226	0.580645	0.776882	0.994624	0.663978	0.010753	0.325269	0.013477	0.056604	0.002695	0.002688	0.177419	0.344086	0.709677	1	0.454301	0.454301	0.913978	0.959677	0.962366	0.013441	0.564516	0.653226	0.75	0.965054	0.354839	0.393531	0.051075	0.317204	0.580645	0.854839	0.994624	0.282258
0.295775	0.211268	0.492958	0.071429	0.271429	0.242857	0.225352	0.492958	0.577465	0.816901	0.985915	0.070423	0.126761	0.267606	0.661972	0.887324	0.014085	0.169014	0.380282	0.71831	1	0.380282	0.169014	0.450704	0.028571	0.114286	0.028571	0.014085	0.239437	0.478873	0.859155	1	0.169014	0.197183	0.309859	0.352113	0.394366	0.084507	0.422535	0.605634	0.71831	0.901408	0.633803	0.342857	0.056338	0.253521	0.422535	0.704225	0.915493	0.239437
0.306011	0.385246	0.308743	0.232877	0.252055	0.210959	0.019126	0.254098	0.494536	0.737705	1	0.005464	0.226776	0.513661	0.748634	0.997268	0.002732	0.265027	0.489071	0.745902	0.991803	0.344262	0.480874	0.174863	0.109589	0.043836	0	0.002732	0.172131	0.54918	0.786885	1	0.030055	0.204918	0.396175	0.726776	0.997268	0.349727	0.453552	0.513661	0.800546	0.964481	0.401639	0.465753	0.008197	0.262295	0.595628	0.789617	0.997268	0.398907
0.377358	0.308176	0.314465	0.253165	0.221519	0.21519	0.018868	0.226415	0.415094	0.666667	1	0.012579	0.320755	0.528302	0.779874	0.993711	0.006289	0.201258	0.503145	0.698113	0.987421	0.383648	0.18239	0.433962	0.044304	0.056962	0.006329	0.006289	0.238994	0.484277	0.798742	1	0.018868	0.056604	0.27673	0.446541	0.559748	0.132075	0.314465	0.610063	0.735849	0.899371	0.515723	0.329114	0.025157	0.283019	0.534591	0.72956	0.987421	0.320755
0.30137	0.34589	0.35274	0.233677	0.254296	0.250859	0.017123	0.246575	0.523973	0.75	0.986301	0.006849	0.236301	0.469178	0.753425	1	0.003425	0.243151	0.486301	0.708904	0.996575	0.462329	0.537671	0	0.116838	0	0	0.003425	0.287671	0.506849	0.815068	1	0.017123	0.208904	0.452055	0.702055	0.976027	0	0	0	0	0	0.414384	0.405498	0.020548	0.273973	0.476027	0.726027	0.996575	0.386986
0.393258	0.337079	0.269663	0.295455	0.090909	0.204545	0.089888	0.505618	0.651685	0.842697	0.988764	0.022472	0.292135	0.47191	0.685393	0.94382	0.011236	0.11236	0.191011	0.359551	1	0.370787	0	0.629213	0	0.159091	0	0.011236	0.325843	0.58427	0.674157	1	0	0	0	0	0	0.044944	0.191011	0.404494	0.741573	0.932584	0.314607	0.272727	0.044944	0.123596	0.247191	0.404494	0.719101	0.438202
0.30721	0.394984	0.297806	0.257862	0.201258	0.226415	0.012539	0.22884	0.517241	0.742947	0.996865	0.009404	0.288401	0.489028	0.727273	0.981191	0.003135	0.194357	0.495298	0.758621	1	0.532915	0.338558	0.128527	0.119497	0.031447	0.012579	0.003135	0.181818	0.479624	0.714734	1	0.050157	0.360502	0.517241	0.805643	0.99373	0.031348	0.310345	0.426332	0.623824	0.865204	0.62069	0.402516	0.018809	0.23511	0.482759	0.755486	0.990596	0.38558
0.296364	0.374545	0.329091	0.209472	0.187614	0.249545	0.005455	0.267273	0.518182	0.769091	0.990909	0.003636	0.250909	0.507273	0.754545	0.998182	0.001818	0.207273	0.467273	0.712727	1	0.407273	0.1	0.492727	0.030965	0.089253	0.005464	0.001818	0.314545	0.54	0.787273	1	0.054545	0.229091	0.512727	0.636364	0.932727	0.010909	0.185455	0.436364	0.712727	0.987273	0.629091	0.327869	0.010909	0.238182	0.496364	0.714545	0.996364	0.374545
0.341935	0.356989	0.301075	0.25	0.211207	0.230603	0.006452	0.208602	0.44086	0.752688	0.991398	0.004301	0.277419	0.513978	0.729032	1	0.002151	0.255914	0.51828	0.772043	0.997849	0.419355	0.303226	0.277419	0.099138	0.068966	0.008621	0.002151	0.180645	0.449462	0.729032	1	0.167742	0.468817	0.595699	0.713978	0.875269	0.047312	0.197849	0.322581	0.913978	0.989247	0.595699	0.396552	0.012903	0.329032	0.546237	0.744086	0.989247	0.348387
0.28496	0.390501	0.324538	0.23545	0.171958	0.246032	0.007916	0.253298	0.509235	0.778364	0.992084	0.005277	0.266491	0.546174	0.791557	0.994723	0.002639	0.211082	0.432718	0.659631	1	0.720317	0.139842	0.139842	0.084656	0.026455	0.005291	0.002639	0.369393	0.572559	0.791557	1	0.094987	0.218997	0.519789	0.757256	0.963061	0.007916	0.039578	0.110818	0.195251	0.279683	0.474934	0.497354	0.015831	0.155673	0.356201	0.649077	0.997361	0.456464
0.311186	0.376787	0.312027	0.223064	0.223064	0.227273	0.002523	0.236333	0.486964	0.763667	0.990749	0.001682	0.248949	0.498738	0.731707	1	0.000841	0.260723	0.504626	0.753574	0.999159	0.404542	0.189235	0.406224	0.064815	0.090067	0.007576	0.000841	0.289319	0.502103	0.778806	1	0.020185	0.210261	0.347351	0.881413	0.986543	0.003364	0.243061	0.515559	0.727502	0.999159	0.612279	0.372054	0.005046	0.247267	0.487805	0.702271	0.997477	0.387721
0.240476	0.32381	0.435714	0.152745	0.183771	0.300716	0.004762	0.240476	0.488095	0.771429	1	0.007143	0.221429	0.538095	0.769048	0.992857	0.002381	0.261905	0.490476	0.72381	0.997619	0.240476	0.007143	0.752381	0.004773	0.090692	0	0.002381	0.32381	0.583333	0.795238	1	0.6	0.6	0.6	0.602381	0.604762	0.004762	0.245238	0.459524	0.740476	0.985714	0.688095	0.238663	0.009524	0.230952	0.459524	0.735714	0.995238	0.309524
0.310127	0.341772	0.348101	0.210191	0.261146	0.178344	0.012658	0.177215	0.443038	0.746835	0.993671	0.018987	0.303797	0.493671	0.689873	1	0.006329	0.227848	0.5	0.765823	0.987342	0.341772	0.196203	0.462025	0.063694	0.063694	0	0.006329	0.126582	0.310127	0.670886	1	0.056962	0.094937	0.373418	0.474684	0.879747	0.158228	0.537975	0.651899	0.822785	0.987342	0.582278	0.407643	0.044304	0.316456	0.518987	0.746835	0.981013	0.379747
0.208861	0.400844	0.390295	0.133192	0.122622	0.340381	0.006329	0.126582	0.244726	0.535865	1	0.004219	0.303797	0.559072	0.805907	0.99789	0.00211	0.316456	0.552743	0.725738	0.991561	0.236287	0.048523	0.71519	0.014799	0.086681	0.002114	0.00211	0.185654	0.459916	0.816456	1	0.059072	0.067511	0.116034	0.132911	0.829114	0.006329	0.295359	0.544304	0.740506	0.991561	0.740506	0.17759	0.008439	0.35654	0.57384	0.7827	0.983122	0.381857
0.396186	0.305085	0.298729	0.205945	0.244161	0.220807	0.012712	0.258475	0.508475	0.779661	0.997881	0.004237	0.245763	0.512712	0.762712	1	0.002119	0.216102	0.459746	0.692797	0.985169	0.336864	0.023305	0.639831	0.010616	0.104034	0.002123	0.002119	0.269068	0.434322	0.847458	1	0.042373	0.197034	0.377119	0.383475	0.389831	0.014831	0.247881	0.527542	0.726695	0.940678	0.491525	0.373673	0.019068	0.233051	0.463983	0.720339	0.985169	0.317797
0.260821	0.447281	0.291898	0.227778	0.155556	0.263333	0.006659	0.170921	0.428413	0.72808	1	0.00222	0.267481	0.518313	0.749168	0.994451	0.00111	0.27636	0.521643	0.759156	0.99889	0.567148	0.316315	0.116537	0.114444	0.041111	0.007778	0.00111	0.251942	0.500555	0.744728	1	0.025527	0.288568	0.520533	0.755827	0.99778	0.00444	0.140954	0.265261	0.734739	0.915649	0.657048	0.275556	0.005549	0.283019	0.531632	0.772475	0.99667	0.446171
0.28125	0.375	0.34375	0.210762	0.210762	0.269058	0.013393	0.308036	0.495536	0.776786	0.995536	0.008929	0.191964	0.446429	0.732143	1	0.004464	0.254464	0.535714	0.75	0.991071	0.508929	0.321429	0.169643	0.09417	0.067265	0.004484	0.004464	0.183036	0.486607	0.754464	1	0.205357	0.303571	0.424107	0.714286	0.982143	0.044643	0.080357	0.620536	0.691964	0.866071	0.575893	0.367713	0.03125	0.223214	0.504464	0.758929	0.986607	0.375
0.371622	0.243243	0.385135	0.163265	0.292517	0.204082	0.013514	0.189189	0.513514	0.743243	1	0.027027	0.351351	0.554054	0.756757	0.966216	0.006757	0.209459	0.412162	0.689189	0.986486	0.493243	0.324324	0.182432	0.129252	0.047619	0.006803	0.006757	0.182432	0.405405	0.743243	1	0.135135	0.256757	0.695946	0.871622	0.986486	0.040541	0.439189	0.547297	0.608108	0.655405	0.554054	0.408163	0.02027	0.263514	0.506757	0.777027	0.986486	0.25
0.322581	0.41129	0.266129	0.238866	0.153846	0.230769	0.008065	0.310484	0.540323	0.778226	1	0.024194	0.21371	0.475806	0.693548	0.983871	0.004032	0.185484	0.467742	0.721774	0.991935	0.383065	0.024194	0.592742	0.004049	0.117409	0.012146	0.004032	0.197581	0.41129	0.616935	1	0.020161	0.020161	0.028226	0.032258	0.084677	0.012097	0.322581	0.572581	0.802419	0.991935	0.685484	0.331984	0.020161	0.254032	0.532258	0.766129	0.979839	0.431452
0.304985	0.363636	0.331378	0.238235	0.2	0.238235	0.008798	0.234604	0.483871	0.788856	1	0.017595	0.266862	0.510264	0.70088	0.973607	0.002933	0.252199	0.478006	0.753666	0.994135	0.354839	0.187683	0.457478	0.073529	0.067647	0.002941	0.002933	0.246334	0.524927	0.803519	1	0.085044	0.260997	0.451613	0.692082	0.950147	0.008798	0.228739	0.501466	0.762463	0.994135	0.601173	0.352941	0.008798	0.260997	0.466276	0.70088	0.994135	0.369501
0.156463	0.437642	0.405896	0.134091	0.118182	0.343182	0.006803	0.142857	0.419501	0.721088	1	0.004535	0.276644	0.52381	0.736961	0.997732	0.002268	0.251701	0.485261	0.777778	0.995465	0.201814	0.027211	0.770975	0.011364	0.075	0.006818	0.002268	0.14966	0.435374	0.823129	1	0.00907	0.013605	0.020408	0.206349	0.993197	0.045351	0.287982	0.528345	0.746032	0.977324	0.827664	0.122727	0.00907	0.240363	0.464853	0.732426	0.993197	0.442177
0.288809	0.462094	0.249097	0.268116	0.188406	0.210145	0.01444	0.212996	0.447653	0.610108	0.99639	0.00722	0.292419	0.624549	0.794224	0.981949	0.00361	0.216606	0.429603	0.67509	1	0.693141	0.209386	0.097473	0.086957	0.021739	0.007246	0.00361	0.288809	0.631769	0.815884	1	0.032491	0.173285	0.299639	0.382671	0.99278	0.025271	0.249097	0.451264	0.476534	0.501805	0.451264	0.304348	0.025271	0.223827	0.386282	0.67148	0.98917	0.501805
0.318735	0.335766	0.345499	0.202439	0.229268	0.25122	0.004866	0.248175	0.525547	0.773723	1	0.014599	0.214112	0.447689	0.725061	0.992701	0.002433	0.272506	0.518248	0.744526	0.997567	0.418491	0.216545	0.364964	0.112195	0.073171	0	0.002433	0.238443	0.476886	0.715328	1	0.004866	0.255474	0.498783	0.676399	0.995134	0.053528	0.270073	0.549878	0.788321	0.982968	0.571776	0.439024	0.007299	0.245742	0.53528	0.759124	0.995134	0.372263
0.283636	0.392727	0.323636	0.182482	0.193431	0.321168	0.018182	0.225455	0.465455	0.763636	1	0.007273	0.265455	0.516364	0.712727	0.989091	0.003636	0.258182	0.487273	0.745455	0.985455	0.374545	0.170909	0.454545	0.062044	0.105839	0.010949	0.003636	0.203636	0.436364	0.796364	1	0.029091	0.218182	0.498182	0.669091	0.974545	0.072727	0.28	0.48	0.734545	0.981818	0.629091	0.284672	0.014545	0.283636	0.534545	0.763636	0.985455	0.356364
0.32785	0.329025	0.343126	0.218824	0.211765	0.245882	0.007051	0.215041	0.455934	0.775558	0.99765	0.00235	0.244418	0.520564	0.726204	1	0.001175	0.27262	0.511163	0.760282	0.998825	0.365452	0.037603	0.596945	0.011765	0.089412	0.011765	0.001175	0.202115	0.46651	0.707403	1	0.27027	0.356052	0.387779	0.479436	0.9953	0.017626	0.252644	0.539365	0.790834	0.99765	0.521739	0.418824	0.0047	0.313749	0.559342	0.747356	0.998825	0.343126
0.271555	0.436745	0.2917	0.241129	0.160484	0.260484	0.006446	0.284448	0.509267	0.752619	0.996777	0.001612	0.252216	0.51249	0.761483	0.998388	0.000806	0.214343	0.45689	0.710717	1	0.521354	0.448832	0.029815	0.143548	0.009677	0	0.000806	0.272361	0.54311	0.825947	1	0.006446	0.215149	0.425463	0.645447	0.995971	0.868654	0.875101	0.882353	0.933118	0.983884	0.396454	0.470968	0.005641	0.273973	0.545528	0.79855	0.995971	0.452861
0.29563	0.367609	0.336761	0.229381	0.198454	0.226804	0.010283	0.25964	0.570694	0.784062	0.997429	0.005141	0.218509	0.496144	0.719794	1	0.002571	0.244216	0.465296	0.70437	0.969152	0.416452	0.182519	0.401028	0.064433	0.059278	0.002577	0.002571	0.285347	0.506427	0.758355	1	0.010283	0.07455	0.267352	0.424165	0.917738	0.113111	0.323907	0.652956	0.77635	0.96144	0.573265	0.396907	0.007712	0.244216	0.447301	0.678663	0.982005	0.365039
0.284192	0.399645	0.316163	0.231317	0.179715	0.245552	0.003552	0.238011	0.433393	0.722913	1	0.010657	0.26643	0.513321	0.774423	0.996448	0.001776	0.236234	0.497336	0.719361	0.994671	0.479574	0.161634	0.358792	0.069395	0.069395	0.005338	0.001776	0.360568	0.603908	0.825933	1	0.055062	0.129663	0.522202	0.689165	0.994671	0.005329	0.204263	0.337478	0.598579	0.912966	0.664298	0.327402	0.005329	0.236234	0.499112	0.717584	0.994671	0.381883
0.301483	0.357496	0.341021	0.219472	0.212871	0.242574	0.003295	0.192751	0.453048	0.721582	0.996705	0.00659	0.276771	0.550247	0.764415	0.998353	0.001647	0.23888	0.4514	0.744646	1	0.477759	0.237232	0.285008	0.09901	0.049505	0	0.001647	0.39374	0.598023	0.790774	1	0.039539	0.5486	0.711697	0.853377	0.988468	0.047776	0.171334	0.258649	0.354201	0.4514	0.556837	0.353135	0.00659	0.273476	0.551895	0.775947	0.99341	0.370675
0.388889	0.262626	0.348485	0.192893	0.299492	0.203046	0.030303	0.191919	0.510101	0.823232	1	0.020202	0.252525	0.469697	0.656566	0.924242	0.005051	0.277778	0.494949	0.712121	0.984848	0.338384	0.242424	0.419192	0.091371	0.050761	0	0.005051	0.222222	0.383838	0.641414	1	0.232323	0.363636	0.535354	0.722222	0.818182	0.030303	0.161616	0.580808	0.883838	0.989899	0.565657	0.385787	0.010101	0.262626	0.505051	0.722222	0.984848	0.262626
0.241758	0.516484	0.241758	0.233333	0.111111	0.311111	0.032967	0.263736	0.527473	0.78022	1	0.010989	0.175824	0.461538	0.714286	0.978022	0.10989	0.307692	0.494505	0.736264	0.989011	0.461538	0	0.538462	0	0.088889	0	0.010989	0.274725	0.395604	0.637363	1	0	0	0	0	0	0.043956	0.164835	0.494505	0.802198	0.967033	0.417582	0.4	0.076923	0.208791	0.428571	0.747253	0.956044	0.56044
0.327922	0.418831	0.253247	0.260586	0.143322	0.19544	0.012987	0.285714	0.597403	0.818182	0.987013	0.006494	0.185065	0.37987	0.63961	0.993506	0.003247	0.347403	0.555195	0.743506	1	0.577922	0.168831	0.253247	0.045603	0.084691	0	0.003247	0.152597	0.366883	0.834416	1	0.292208	0.405844	0.454545	0.642857	0.931818	0.068182	0.506494	0.616883	0.769481	0.957792	0.435065	0.306189	0.00974	0.311688	0.5	0.662338	0.99026	0.464286
0.297203	0.370629	0.332168	0.22807	0.161404	0.235088	0.027972	0.248252	0.5	0.741259	1	0.006993	0.22028	0.461538	0.734266	0.996503	0.003497	0.244755	0.531469	0.751748	0.982517	0.34965	0.234266	0.416084	0.084211	0.070175	0	0.003497	0.202797	0.496503	0.730769	1	0.01049	0.125874	0.573427	0.821678	0.982517	0.052448	0.332168	0.475524	0.65035	0.881119	0.601399	0.364912	0.01049	0.283217	0.472028	0.713287	0.982517	0.391608
0.254417	0.526502	0.219081	0.20922	0.159574	0.152482	0.028269	0.452297	0.650177	0.812721	0.992933	0.007067	0.166078	0.310954	0.583039	0.989399	0.003534	0.501767	0.639576	0.795053	1	0.590106	0.042403	0.367491	0.035461	0.056738	0.007092	0.003534	0.144876	0.293286	0.519435	1	0.469965	0.60424	0.812721	0.943463	0.954064	0.300353	0.551237	0.713781	0.865724	0.996466	0.568905	0.397163	0.021201	0.24735	0.498233	0.763251	0.996466	0.4947
0.293333	0.466667	0.24	0.283784	0.148649	0.216216	0.026667	0.106667	0.293333	0.56	0.813333	0.146667	0.386667	0.573333	0.826667	1	0.013333	0.12	0.346667	0.786667	0.973333	0.493333	0.173333	0.333333	0.081081	0.054054	0	0.013333	0.28	0.506667	0.866667	1	0.08	0.106667	0.306667	0.346667	0.48	0.16	0.226667	0.626667	0.706667	0.8	0.64	0.378378	0.066667	0.386667	0.626667	0.8	0.973333	0.4
0.19685	0.594488	0.208661	0.217391	0.12253	0.173913	0.023622	0.224409	0.602362	0.814961	0.996063	0.011811	0.291339	0.480315	0.716535	1	0.003937	0.082677	0.358268	0.748031	0.984252	0.88189	0.043307	0.074803	0.039526	0.01581	0	0.003937	0.291339	0.511811	0.755906	1	0.669291	0.712598	0.744094	0.795276	0.984252	0.015748	0.027559	0.047244	0.066929	0.866142	0.346457	0.300395	0.015748	0.114173	0.610236	0.759843	0.984252	0.622047
0.203333	0.486667	0.31	0.197324	0.113712	0.344482	0.006667	0.236667	0.52	0.706667	1	0.02	0.286667	0.493333	0.77	0.996667	0.003333	0.183333	0.47	0.686667	0.993333	0.55	0.39	0.06	0.157191	0.010033	0.010033	0.003333	0.296667	0.516667	0.776667	1	0.01	0.263333	0.556667	0.726667	0.996667	0.013333	0.023333	0.04	0.053333	0.463333	0.606667	0.394649	0.013333	0.216667	0.463333	0.72	0.996667	0.48
0.317365	0.353293	0.329341	0.228916	0.198795	0.26506	0.041916	0.299401	0.532934	0.730539	1	0.011976	0.161677	0.461078	0.760479	0.994012	0.005988	0.191617	0.479042	0.736527	0.97006	0.42515	0.377246	0.197605	0.084337	0.024096	0	0.005988	0.317365	0.562874	0.874251	1	0.233533	0.389222	0.60479	0.736527	0.94012	0.023952	0.065868	0.113772	0.161677	0.431138	0.562874	0.385542	0.023952	0.167665	0.48503	0.730539	0.994012	0.353293
0.296296	0.4	0.303704	0.231343	0.186567	0.231343	0.125926	0.340741	0.540741	0.755556	0.948148	0.037037	0.2	0.562963	0.733333	0.992593	0.007407	0.088889	0.385185	0.644444	1	0.57037	0.296296	0.133333	0.134328	0.014925	0.029851	0.007407	0.266667	0.540741	0.711111	1	0.022222	0.222222	0.385185	0.62963	0.874074	0.044444	0.074074	0.911111	0.940741	0.977778	0.540741	0.328358	0.022222	0.17037	0.407407	0.733333	0.977778	0.348148
0.256966	0.464396	0.278638	0.245342	0.139752	0.236025	0.009288	0.164087	0.402477	0.690402	0.990712	0.006192	0.275542	0.517028	0.79257	1	0.003096	0.260062	0.52322	0.73065	0.996904	0.411765	0.164087	0.424149	0.083851	0.090062	0.003106	0.003096	0.204334	0.486068	0.696594	1	0.049536	0.229102	0.377709	0.640867	0.907121	0.012384	0.28483	0.517028	0.786378	0.981424	0.628483	0.347826	0.009288	0.244582	0.47678	0.712074	0.993808	0.464396
0.33777	0.420965	0.241265	0.265	0.171667	0.176667	0.018303	0.259567	0.52579	0.763727	0.996672	0.003328	0.231281	0.422629	0.667221	1	0.001664	0.266223	0.635607	0.826955	0.993344	0.690516	0.099834	0.209651	0.036667	0.043333	0.003333	0.001664	0.239601	0.412646	0.602329	1	0.006656	0.672213	0.767055	0.855241	0.946755	0.026622	0.497504	0.738769	0.835275	0.990017	0.311148	0.293333	0.006656	0.251248	0.720466	0.858569	0.993344	0.450915
0.302326	0.429457	0.268217	0.254658	0.164596	0.226708	0.003101	0.271318	0.493023	0.748837	0.995349	0.006202	0.231008	0.505426	0.75814	0.99845	0.00155	0.254264	0.48062	0.72093	1	0.475969	0.234109	0.289922	0.071429	0.046584	0	0.00155	0.203101	0.497674	0.742636	1	0.04186	0.649612	0.787597	0.87907	0.99845	0.004651	0.213953	0.336434	0.44031	0.6	0.702326	0.332298	0.006202	0.254264	0.505426	0.72093	0.996899	0.418605
0.243956	0.345055	0.410989	0.156388	0.147577	0.314978	0.013187	0.178022	0.567033	0.742857	0.978022	0.004396	0.281319	0.487912	0.70989	0.997802	0.002198	0.250549	0.459341	0.795604	1	0.454945	0.015385	0.52967	0.013216	0.048458	0	0.002198	0.184615	0.589011	0.703297	1	0.008791	0.008791	0.410989	0.457143	0.461538	0.105495	0.246154	0.474725	0.830769	0.993407	0.523077	0.185022	0.004396	0.23956	0.393407	0.832967	0.995604	0.336264
0.292647	0.333824	0.373529	0.175258	0.220913	0.248895	0.010294	0.2	0.425	0.729412	1	0.004412	0.273529	0.538235	0.766176	0.997059	0.001471	0.258824	0.505882	0.739706	0.998529	0.392647	0.101471	0.505882	0.036819	0.078056	0.0162	0.001471	0.189706	0.392647	0.630882	1	0.030882	0.079412	0.242647	0.642647	0.960294	0.098529	0.358824	0.591176	0.798529	0.958824	0.552941	0.356406	0.004412	0.251471	0.507353	0.745588	0.989706	0.351471
0.324	0.396	0.28	0.220884	0.188755	0.184739	0.04	0.324	0.564	0.752	0.996	0.008	0.224	0.464	0.792	1	0.004	0.184	0.436	0.656	0.956	0.544	0.248	0.208	0.100402	0.036145	0.004016	0.004	0.224	0.552	0.836	1	0.024	0.164	0.428	0.656	0.928	0.324	0.372	0.504	0.7	0.752	0.544	0.345382	0.016	0.204	0.436	0.648	0.976	0.404
0.336788	0.284974	0.378238	0.197917	0.265625	0.1875	0.015544	0.217617	0.507772	0.746114	1	0.020725	0.207254	0.42487	0.803109	0.989637	0.005181	0.279793	0.487047	0.668394	0.994819	0.352332	0.165803	0.481865	0.0625	0.083333	0	0.005181	0.227979	0.533679	0.88601	1	0.015544	0.259067	0.357513	0.398964	0.958549	0.07772	0.279793	0.53886	0.704663	0.860104	0.595855	0.40625	0.010363	0.26943	0.466321	0.647668	0.979275	0.305699
0.331058	0.369738	0.299204	0.242597	0.205011	0.235763	0.002275	0.229807	0.47099	0.697383	1	0.005688	0.21843	0.480091	0.773606	0.998862	0.001138	0.292378	0.534699	0.772469	0.994312	0.50967	0.069397	0.420933	0.031891	0.079727	0.002278	0.001138	0.212742	0.392491	0.716724	1	0.009101	0.255973	0.508532	0.649602	0.865757	0.017065	0.294653	0.585893	0.797497	0.988623	0.510808	0.416856	0.007964	0.349261	0.590444	0.794084	0.995449	0.357224
0.238189	0.472441	0.28937	0.226824	0.167653	0.25641	0.003937	0.232283	0.454724	0.732283	0.98622	0.005906	0.251969	0.51378	0.769685	1	0.001969	0.246063	0.482283	0.742126	0.996063	0.431102	0.190945	0.377953	0.071006	0.063116	0	0.001969	0.187008	0.494094	0.773622	1	0.041339	0.253937	0.529528	0.675197	0.931102	0.088583	0.281496	0.433071	0.76378	0.996063	0.641732	0.303748	0.005906	0.283465	0.55315	0.753937	0.990157	0.511811
0.320611	0.362595	0.316794	0.199234	0.206897	0.226054	0.038168	0.251908	0.480916	0.778626	0.996183	0.007634	0.282443	0.557252	0.755725	1	0.003817	0.221374	0.408397	0.717557	0.965649	0.553435	0.179389	0.267176	0.084291	0.045977	0.007663	0.003817	0.290076	0.561069	0.71374	1	0.022901	0.068702	0.473282	0.740458	0.969466	0.076336	0.232824	0.343511	0.812977	0.885496	0.469466	0.383142	0.022901	0.217557	0.469466	0.770992	0.973282	0.400763
0.255814	0.375194	0.368992	0.18323	0.177019	0.282609	0.006202	0.308527	0.59845	0.781395	0.995349	0.004651	0.243411	0.472868	0.700775	0.993798	0.00155	0.187597	0.454264	0.737984	1	0.266667	0.124031	0.609302	0.043478	0.093168	0.012422	0.00155	0.252713	0.548837	0.775194	1	0.156589	0.24186	0.627907	0.855814	0.99845	0.003101	0.251163	0.457364	0.728682	0.95969	0.612403	0.326087	0.007752	0.220155	0.444961	0.72093	0.996899	0.384496
0.252577	0.405498	0.341924	0.203098	0.158348	0.299484	0.020619	0.233677	0.503436	0.723368	0.991409	0.003436	0.268041	0.5189	0.762887	0.998282	0.001718	0.230241	0.467354	0.761168	1	0.52921	0.300687	0.170103	0.096386	0.034423	0.006885	0.001718	0.261168	0.479381	0.735395	1	0.065292	0.381443	0.553265	0.718213	0.955326	0.0189	0.213058	0.331615	0.929553	0.989691	0.606529	0.285714	0.008591	0.238832	0.493127	0.762887	0.989691	0.40378
0.305882	0.423529	0.270588	0.248031	0.192913	0.240157	0.007843	0.227451	0.435294	0.690196	0.988235	0.023529	0.247059	0.533333	0.796078	0.996078	0.003922	0.25098	0.505882	0.67451	1	0.52549	0.027451	0.447059	0.007874	0.11811	0.015748	0.003922	0.376471	0.588235	0.796078	1	0.12549	0.12549	0.133333	0.556863	0.564706	0.035294	0.227451	0.341176	0.694118	0.917647	0.545098	0.448819	0.011765	0.258824	0.470588	0.721569	0.984314	0.447059
0.448718	0.153846	0.397436	0.116883	0.415584	0.142857	0.025641	0.217949	0.448718	0.769231	1	0.153846	0.307692	0.5	0.833333	0.935897	0.012821	0.179487	0.474359	0.692308	0.987179	0.384615	0.025641	0.589744	0.025974	0.12987	0	0.012821	0.25641	0.641026	0.75641	1	0.679487	0.679487	0.679487	0.679487	0.692308	0.038462	0.166667	0.474359	0.615385	0.974359	0.461538	0.415584	0.038462	0.358974	0.5	0.641026	0.948718	0.24359
0.321234	0.339383	0.339383	0.207273	0.22	0.261818	0.005445	0.255898	0.515426	0.754991	1	0.00363	0.206897	0.46098	0.716878	0.99637	0.001815	0.266788	0.519056	0.77314	0.998185	0.37931	0.147005	0.473684	0.061818	0.069091	0.003636	0.001815	0.290381	0.508167	0.742287	1	0.00726	0.170599	0.277677	0.448276	0.600726	0.036298	0.248639	0.624319	0.791289	0.961887	0.558984	0.392727	0.009074	0.23412	0.524501	0.720508	0.998185	0.353902
0.215909	0.261364	0.522727	0.126437	0.195402	0.264368	0.034091	0.431818	0.715909	0.818182	0.977273	0.102273	0.306818	0.602273	0.75	0.988636	0.011364	0.193182	0.352273	0.568182	1	0.340909	0.181818	0.477273	0.091954	0.022989	0.022989	0.011364	0.545455	0.715909	0.863636	1	0.045455	0.579545	0.659091	0.784091	0.977273	0.068182	0.170455	0.295455	0.409091	0.75	0.5	0.298851	0.045455	0.159091	0.534091	0.670455	0.965909	0.272727
0.308998	0.409168	0.281834	0.263605	0.168367	0.219388	0.006791	0.219015	0.483871	0.719864	0.996604	0.003396	0.21562	0.470289	0.745331	0.989813	0.001698	0.336163	0.536503	0.770798	1	0.568761	0.125637	0.305603	0.054422	0.102041	0.006803	0.001698	0.219015	0.565365	0.765705	1	0.035654	0.174873	0.363328	0.456706	0.764007	0.005093	0.303905	0.516129	0.780985	0.988115	0.495756	0.323129	0.003396	0.329372	0.517827	0.73854	0.998302	0.438031
0.343612	0.334802	0.321586	0.20354	0.238938	0.221239	0.022026	0.259912	0.546256	0.757709	0.991189	0.008811	0.237885	0.45815	0.735683	0.995595	0.004405	0.22467	0.462555	0.748899	1	0.440529	0.207048	0.352423	0.070796	0.070796	0	0.004405	0.321586	0.546256	0.77533	1	0.022026	0.154185	0.343612	0.69163	0.942731	0.061674	0.202643	0.45815	0.656388	0.995595	0.528634	0.380531	0.017621	0.23348	0.45815	0.696035	0.986784	0.370044
0.301724	0.293103	0.405172	0.182609	0.182609	0.252174	0.068966	0.224138	0.508621	0.836207	0.991379	0.017241	0.310345	0.568966	0.706897	0.982759	0.008621	0.189655	0.422414	0.689655	1	0.318966	0.318966	0.362069	0.086957	0.043478	0	0.017241	0.086207	0.37069	0.62931	1	0.103448	0.198276	0.293103	0.594828	0.715517	0.008621	0.474138	0.793103	0.87931	0.974138	0.689655	0.330435	0.025862	0.275862	0.456897	0.672414	0.974138	0.344828
0.317073	0.308943	0.373984	0.190217	0.241848	0.26087	0.01355	0.238482	0.476965	0.701897	1	0.00542	0.243902	0.501355	0.780488	0.99458	0.00271	0.249322	0.506775	0.739837	0.99729	0.514905	0.384824	0.100271	0.125	0.016304	0	0.00271	0.271003	0.514905	0.775068	1	0.165312	0.382114	0.588076	0.761518	0.99458	0.03794	0.059621	0.092141	0.116531	0.149051	0.623306	0.315217	0.01626	0.284553	0.523035	0.747967	0.99729	0.365854
0.171053	0.197368	0.631579	0.04	0.226667	0.306667	0.263158	0.355263	0.447368	0.618421	0.960526	0.026316	0.092105	0.236842	0.789474	0.973684	0.013158	0.25	0.526316	0.723684	1	0.052632	0.065789	0.881579	0.013333	0.013333	0.013333	0.013158	0.013158	0.026316	0.986842	1	0.039474	0.039474	0.052632	0.065789	0.092105	0.105263	0.302632	0.526316	0.75	0.973684	0.657895	0.293333	0.039474	0.184211	0.460526	0.657895	0.947368	0.197368
0.261146	0.388535	0.350318	0.178914	0.191693	0.28754	0.035032	0.242038	0.528662	0.764331	0.993631	0.006369	0.181529	0.442675	0.687898	0.968153	0.003185	0.315287	0.547771	0.754777	1	0.487261	0.289809	0.22293	0.095847	0.057508	0	0.003185	0.242038	0.474522	0.700637	1	0.006369	0.16242	0.328025	0.522293	0.904459	0.092357	0.592357	0.732484	0.920382	0.993631	0.566879	0.370607	0.006369	0.305732	0.525478	0.742038	0.996815	0.404459
0.320346	0.359307	0.320346	0.234783	0.217391	0.269565	0.008658	0.242424	0.528139	0.766234	0.987013	0.012987	0.233766	0.480519	0.727273	0.995671	0.004329	0.238095	0.489177	0.735931	1	0.437229	0.147186	0.415584	0.056522	0.082609	0.004348	0.004329	0.320346	0.536797	0.805195	1	0.012987	0.116883	0.25974	0.575758	0.844156	0.056277	0.225108	0.502165	0.757576	0.991342	0.593074	0.356522	0.012987	0.212121	0.502165	0.692641	0.982684	0.398268
0.247863	0.358974	0.393162	0.215517	0.103448	0.336207	0.136752	0.25641	0.666667	0.794872	1	0.017094	0.264957	0.418803	0.589744	0.991453	0.008547	0.17094	0.521368	0.726496	0.965812	0.444444	0.179487	0.376068	0.086207	0.051724	0.051724	0.008547	0.282051	0.418803	0.632479	1	0.034188	0.42735	0.504274	0.700855	0.820513	0.042735	0.128205	0.538462	0.880342	0.974359	0.649573	0.224138	0.025641	0.188034	0.452991	0.623932	0.965812	0.401709
0.342697	0.289326	0.367978	0.177465	0.261972	0.216901	0.005618	0.230337	0.491573	0.772472	0.994382	0.019663	0.233146	0.494382	0.716292	0.955056	0.002809	0.258427	0.497191	0.786517	1	0.300562	0.123596	0.575843	0.050704	0.090141	0	0.002809	0.252809	0.466292	0.744382	1	0.008427	0.092697	0.314607	0.516854	0.766854	0.036517	0.272472	0.561798	0.789326	0.997191	0.648876	0.394366	0.008427	0.238764	0.502809	0.741573	0.997191	0.261236
0.367521	0.376068	0.25641	0.301724	0.224138	0.181034	0.025641	0.213675	0.478632	0.726496	1	0.017094	0.290598	0.504274	0.752137	0.982906	0.008547	0.179487	0.470085	0.65812	0.957265	0.435897	0.376068	0.188034	0.103448	0.051724	0	0.008547	0.17094	0.376068	0.675214	1	0.068376	0.239316	0.504274	0.632479	0.769231	0.034188	0.401709	0.837607	0.880342	0.931624	0.461538	0.465517	0.034188	0.307692	0.521368	0.74359	0.974359	0.393162
0.379487	0.317949	0.302564	0.273196	0.195876	0.21134	0.05641	0.282051	0.564103	0.748718	1	0.020513	0.220513	0.410256	0.712821	0.994872	0.005128	0.225641	0.451282	0.728205	0.984615	0.410256	0.276923	0.312821	0.103093	0.051546	0.010309	0.005128	0.215385	0.384615	0.779487	1	0.015385	0.420513	0.512821	0.589744	0.692308	0.05641	0.179487	0.723077	0.830769	0.912821	0.45641	0.371134	0.010256	0.246154	0.512821	0.717949	0.948718	0.338462
0.25641	0.401709	0.34188	0.206897	0.224138	0.293103	0.017094	0.333333	0.547009	0.803419	0.991453	0.059829	0.213675	0.452991	0.700855	0.957265	0.008547	0.128205	0.461538	0.74359	1	0.538462	0.299145	0.162393	0.12931	0.043103	0.008621	0.008547	0.316239	0.504274	0.74359	1	0.025641	0.34188	0.675214	0.854701	0.982906	0.051282	0.076923	0.196581	0.239316	0.598291	0.57265	0.431034	0.025641	0.162393	0.461538	0.692308	0.982906	0.470085
0.313622	0.38226	0.304118	0.231501	0.20296	0.242072	0.003168	0.248152	0.488912	0.751848	1	0.009504	0.25132	0.4868	0.726505	0.998944	0.001056	0.24076	0.519535	0.763464	0.992608	0.548046	0.158395	0.293559	0.063425	0.063425	0.006342	0.001056	0.213305	0.457233	0.726505	1	0.022175	0.288279	0.395987	0.696938	0.968321	0.007392	0.421331	0.592397	0.779303	0.996832	0.588173	0.376321	0.002112	0.265048	0.553326	0.757128	0.992608	0.421331
0.265487	0.424779	0.309735	0.248521	0.153846	0.269231	0.017699	0.283186	0.477876	0.775811	0.99115	0.0059	0.256637	0.495575	0.734513	1	0.00295	0.185841	0.516224	0.731563	0.99705	0.545723	0.094395	0.359882	0.035503	0.106509	0.011834	0.00295	0.268437	0.492625	0.820059	1	0.056047	0.106195	0.327434	0.587021	0.740413	0.0059	0.185841	0.530973	0.681416	0.988201	0.548673	0.366864	0.011799	0.185841	0.498525	0.696165	0.970501	0.424779
0.359155	0.340962	0.299883	0.236054	0.200235	0.204345	0.003521	0.248239	0.504108	0.766432	1	0.001174	0.221244	0.482981	0.724178	0.994131	0.000587	0.286972	0.519366	0.746479	0.999413	0.535798	0.139671	0.324531	0.062243	0.069289	0.004698	0.000587	0.195423	0.454812	0.746479	1	0.003521	0.318075	0.546948	0.780516	0.890845	0.005282	0.335094	0.579812	0.751174	0.998826	0.496479	0.368761	0.002347	0.281103	0.510563	0.725352	0.995892	0.36385
0.363636	0.343434	0.292929	0.306122	0.214286	0.244898	0.020202	0.20202	0.515152	0.767677	1	0.030303	0.272727	0.484848	0.757576	0.949495	0.010101	0.212121	0.40404	0.656566	0.929293	0.282828	0.121212	0.59596	0.081633	0.081633	0	0.010101	0.080808	0.707071	0.919192	1	0.050505	0.10101	0.131313	0.555556	0.929293	0.161616	0.292929	0.474747	0.686869	0.909091	0.464646	0.530612	0.050505	0.282828	0.494949	0.666667	0.939394	0.343434
0.202857	0.388571	0.408571	0.12894	0.146132	0.346705	0.005714	0.428571	0.711429	0.84	0.985714	0.011429	0.228571	0.525714	0.762857	0.994286	0.002857	0.22	0.417143	0.648571	1	0.377143	0.071429	0.551429	0.025788	0.065903	0.008596	0.002857	0.445714	0.731429	0.888571	1	0.125714	0.231429	0.374286	0.454286	0.982857	0.017143	0.208571	0.4	0.591429	0.851429	0.682857	0.229226	0.014286	0.205714	0.405714	0.617143	0.991429	0.391429
0.295417	0.463993	0.240589	0.241605	0.144963	0.225225	0.004092	0.225041	0.425532	0.781506	0.999182	0.002455	0.268412	0.53437	0.754501	0.998363	0.000818	0.242226	0.463993	0.722586	1	0.684124	0.079378	0.236498	0.035217	0.048321	0.000819	0.000818	0.253682	0.523732	0.757774	1	0.035188	0.164484	0.270049	0.569558	0.994272	0.013912	0.288871	0.42144	0.751227	0.988543	0.373159	0.34398	0.009002	0.259411	0.482815	0.702946	0.997545	0.494272
0.316547	0.334532	0.348921	0.212996	0.234657	0.194946	0.010791	0.258993	0.532374	0.744604	0.989209	0.007194	0.226619	0.471223	0.730216	1	0.003597	0.255396	0.510791	0.76259	0.996403	0.431655	0.208633	0.359712	0.093863	0.093863	0.00722	0.003597	0.183453	0.420863	0.68705	1	0.086331	0.147482	0.302158	0.81295	0.917266	0.057554	0.438849	0.618705	0.773381	0.996403	0.543165	0.361011	0.017986	0.276978	0.539568	0.751799	0.992806	0.352518
0.294118	0.352941	0.352941	0.184211	0.190789	0.315789	0.019608	0.346405	0.529412	0.686275	1	0.026144	0.222222	0.457516	0.699346	0.986928	0.006536	0.196078	0.509804	0.784314	0.993464	0.51634	0.294118	0.189542	0.092105	0.026316	0	0.006536	0.281046	0.470588	0.666667	1	0.183007	0.346405	0.777778	0.895425	0.986928	0.013072	0.052288	0.098039	0.143791	0.601307	0.555556	0.421053	0.026144	0.183007	0.542484	0.764706	0.973856	0.366013
0.288562	0.411333	0.300105	0.239496	0.195378	0.244748	0.002099	0.204617	0.505771	0.75446	0.998951	0.003148	0.274921	0.490031	0.75341	1	0.001049	0.24659	0.49213	0.736621	0.990556	0.420776	0.149003	0.43022	0.073529	0.079832	0.006303	0.001049	0.267576	0.479538	0.686254	1	0.051417	0.217209	0.422875	0.608604	0.997901	0.004197	0.231899	0.612802	0.782791	0.989507	0.586569	0.378151	0.003148	0.252886	0.497377	0.714586	0.989507	0.424974
0.277955	0.405751	0.316294	0.25	0.182692	0.262821	0.009585	0.223642	0.476038	0.709265	1	0.00639	0.255591	0.482428	0.763578	0.99361	0.003195	0.246006	0.533546	0.744409	0.996805	0.520767	0.204473	0.27476	0.083333	0.070513	0	0.003195	0.220447	0.482428	0.715655	1	0.028754	0.249201	0.5623	0.731629	0.805112	0.047923	0.354633	0.43131	0.853035	0.99361	0.591054	0.326923	0.01278	0.258786	0.517572	0.71885	0.990415	0.466454
0.271715	0.429844	0.298441	0.216518	0.178571	0.274554	0.004454	0.253898	0.525612	0.788419	1	0.008909	0.216036	0.478842	0.737194	0.988864	0.002227	0.247216	0.476615	0.721604	0.991091	0.416481	0.242762	0.340757	0.113839	0.078125	0.002232	0.002227	0.269488	0.530067	0.746102	1	0.017817	0.305122	0.536748	0.777283	0.944321	0.033408	0.184855	0.412027	0.712695	0.995546	0.641425	0.388393	0.008909	0.240535	0.501114	0.76392	0.991091	0.445434
0.362069	0.318966	0.318966	0.217391	0.252174	0.2	0.051724	0.387931	0.577586	0.75	0.974138	0.017241	0.163793	0.37069	0.646552	0.991379	0.008621	0.206897	0.482759	0.706897	1	0.37931	0.017241	0.603448	0	0.121739	0.017391	0.008621	0.12931	0.551724	0.905172	1	0.043103	0.043103	0.043103	0.043103	0.051724	0.034483	0.293103	0.474138	0.681034	0.887931	0.456897	0.53913	0.034483	0.206897	0.439655	0.689655	0.982759	0.327586
0.312585	0.354533	0.332882	0.214092	0.224932	0.260163	0.00406	0.251691	0.508796	0.752368	0.998647	0.002706	0.257104	0.496617	0.745602	0.997294	0.001353	0.227334	0.488498	0.738836	1	0.439783	0.52774	0.032476	0.158537	0.017615	0.004065	0.001353	0.281461	0.546685	0.778078	1	0.005413	0.215156	0.4682	0.717185	0.989175	0.117727	0.198917	0.510149	0.644114	0.991881	0.374831	0.468835	0.00406	0.223275	0.496617	0.7659	0.994587	0.400541
0.288889	0.411111	0.3	0.206704	0.223464	0.251397	0.016667	0.222222	0.466667	0.772222	1	0.011111	0.244444	0.483333	0.722222	0.988889	0.005556	0.261111	0.511111	0.75	0.994444	0.622222	0.183333	0.194444	0.100559	0.044693	0	0.005556	0.283333	0.516667	0.766667	1	0.077778	0.361111	0.716667	0.805556	0.944444	0.016667	0.055556	0.161111	0.411111	0.605556	0.516667	0.357542	0.033333	0.355556	0.5	0.711111	0.983333	0.433333
0.235012	0.501199	0.263789	0.230769	0.139423	0.21875	0.01199	0.251799	0.496403	0.724221	0.976019	0.004796	0.230216	0.491607	0.755396	1	0.002398	0.261391	0.510791	0.76259	0.98801	0.402878	0.194245	0.402878	0.091346	0.072115	0.004808	0.002398	0.189448	0.453237	0.776978	1	0.014388	0.100719	0.340528	0.767386	0.98801	0.122302	0.366906	0.520384	0.726619	0.942446	0.642686	0.331731	0.009592	0.270983	0.532374	0.769784	0.98801	0.561151
0.162447	0.375527	0.462025	0.114165	0.133192	0.372093	0.010549	0.229958	0.50211	0.767932	1	0.004219	0.244726	0.474684	0.708861	0.987342	0.00211	0.251055	0.510549	0.753165	0.995781	0.274262	0.025316	0.700422	0.012685	0.093023	0.004228	0.00211	0.248945	0.489451	0.706751	1	0.253165	0.348101	0.774262	0.780591	0.793249	0.016878	0.238397	0.506329	0.746835	0.995781	0.791139	0.186047	0.006329	0.248945	0.493671	0.719409	0.995781	0.348101
0.371601	0.296073	0.332326	0.221212	0.245455	0.172727	0.009063	0.250755	0.543807	0.761329	0.990937	0.006042	0.220544	0.432024	0.673716	0.996979	0.003021	0.247734	0.504532	0.731118	1	0.277946	0.018127	0.703927	0.009091	0.124242	0.009091	0.003021	0.259819	0.507553	0.800604	1	0.39577	0.39577	0.401813	0.404834	0.975831	0.018127	0.238671	0.486405	0.725076	0.957704	0.483384	0.448485	0.012085	0.253776	0.47432	0.722054	0.975831	0.34139
0.203704	0.339506	0.45679	0.124224	0.180124	0.273292	0.012346	0.160494	0.487654	0.790123	1	0.030864	0.191358	0.524691	0.709877	0.95679	0.006173	0.259259	0.475309	0.746914	0.993827	0.314815	0.037037	0.648148	0.024845	0.074534	0.024845	0.006173	0.080247	0.54321	0.765432	1	0.055556	0.055556	0.91358	0.919753	0.987654	0.12963	0.283951	0.475309	0.660494	0.981481	0.709877	0.21118	0.030864	0.259259	0.487654	0.691358	0.981481	0.320988
0.333965	0.424242	0.241793	0.219204	0.140872	0.226153	0.002525	0.279672	0.479798	0.756313	0.996843	0.001263	0.239899	0.493056	0.727904	1	0.000631	0.219697	0.525884	0.811869	0.998737	0.673611	0.203283	0.123106	0.097915	0.032217	0.006949	0.000631	0.250631	0.443813	0.707702	1	0.011364	0.174874	0.472854	0.671717	0.958333	0.001894	0.606692	0.815657	0.897727	0.986111	0.520202	0.315856	0.001894	0.219697	0.524621	0.756313	0.986742	0.42298
0.197761	0.369403	0.432836	0.146067	0.153558	0.325843	0.007463	0.279851	0.522388	0.742537	0.985075	0.018657	0.242537	0.470149	0.708955	0.996269	0.003731	0.220149	0.488806	0.761194	1	0.287313	0.044776	0.66791	0.018727	0.071161	0.003745	0.003731	0.302239	0.600746	0.753731	1	0.037313	0.044776	0.261194	0.272388	0.589552	0.063433	0.238806	0.462687	0.761194	0.958955	0.761194	0.194757	0.014925	0.257463	0.488806	0.723881	0.951493	0.36194
0.264865	0.362162	0.372973	0.217391	0.217391	0.288043	0.021622	0.189189	0.524324	0.805405	0.962162	0.016216	0.232432	0.454054	0.72973	1	0.005405	0.264865	0.508108	0.708108	0.989189	0.578378	0.227027	0.194595	0.076087	0.065217	0.032609	0.005405	0.308108	0.475676	0.718919	1	0.016216	0.140541	0.291892	0.572973	0.972973	0.054054	0.302703	0.708108	0.908108	0.983784	0.610811	0.413043	0.016216	0.286486	0.513514	0.702703	0.989189	0.421622
0.154286	0.457143	0.388571	0.12894	0.100287	0.39255	0.008571	0.122857	0.465714	0.717143	0.994286	0.014286	0.257143	0.482857	0.72	0.997143	0.002857	0.262857	0.52	0.76	1	0.251429	0.014286	0.734286	0.005731	0.074499	0.005731	0.002857	0.074286	0.294286	0.685714	1	0.054286	0.054286	0.057143	0.06	0.474286	0.108571	0.32	0.548571	0.768571	0.977143	0.757143	0.143266	0.005714	0.308571	0.508571	0.742857	0.974286	0.457143
0.328912	0.416446	0.254642	0.268617	0.207447	0.210106	0.01061	0.214854	0.408488	0.795756	1	0.013263	0.275862	0.506631	0.750663	0.997347	0.002653	0.238727	0.533156	0.702918	0.97878	0.352785	0.156499	0.490716	0.074468	0.045213	0	0.002653	0.374005	0.511936	0.687003	0.994695	0.005305	0.440318	0.538462	0.618037	0.708223	0.015915	0.167109	0.30504	0.859416	1	0.400531	0.441489	0.007958	0.201592	0.456233	0.787798	0.986737	0.448276
0.3056	0.3824	0.312	0.198718	0.201923	0.229167	0.0112	0.2352	0.488	0.7744	0.9936	0.0032	0.2624	0.5024	0.7568	1	0.0016	0.192	0.4944	0.7136	0.9968	0.5744	0.0832	0.3424	0.028846	0.080128	0.00641	0.0016	0.2624	0.5344	0.8208	1	0.0048	0.3744	0.4592	0.5968	0.9568	0.016	0.1216	0.4768	0.704	0.9952	0.4896	0.320513	0.0032	0.2368	0.5088	0.6784	0.9968	0.424
0.398855	0.307252	0.293893	0.246654	0.246654	0.17782	0.003817	0.251908	0.53626	0.791985	0.998092	0.013359	0.229008	0.456107	0.673664	0.986641	0.001908	0.242366	0.503817	0.755725	1	0.377863	0.175573	0.446565	0.061185	0.057361	0.015296	0.001908	0.227099	0.469466	0.717557	1	0.055344	0.209924	0.375954	0.526718	0.917939	0.009542	0.251908	0.582061	0.816794	0.996183	0.540076	0.416826	0.005725	0.280534	0.480916	0.69084	0.980916	0.328244
0.324853	0.399217	0.27593	0.256863	0.154902	0.219608	0.007828	0.238748	0.497065	0.722114	0.988258	0.003914	0.299413	0.540117	0.78865	1	0.001957	0.205479	0.412916	0.684932	0.994129	0.514677	0.150685	0.334638	0.052941	0.068627	0.001961	0.001957	0.252446	0.571429	0.808219	1	0.056751	0.193738	0.367906	0.880626	0.992172	0.084149	0.297456	0.430528	0.657534	0.976517	0.469667	0.298039	0.023483	0.242661	0.44227	0.632094	0.994129	0.426614
0.25	0.428571	0.321429	0.254545	0.127273	0.218182	0.071429	0.142857	0.357143	0.5	1	0.035714	0.196429	0.535714	0.767857	0.928571	0.017857	0.25	0.625	0.714286	0.982143	0.642857	0.089286	0.267857	0.054545	0.090909	0.018182	0.017857	0.160714	0.482143	0.714286	1	0.625	0.625	0.642857	0.660714	0.839286	0.321429	0.357143	0.428571	0.803571	0.964286	0.5	0.290909	0.178571	0.446429	0.660714	0.839286	0.964286	0.464286
0.311759	0.371923	0.316317	0.208029	0.195255	0.255474	0.004558	0.262534	0.509572	0.752963	0.998177	0.002735	0.244303	0.502279	0.76299	0.999088	0.000912	0.233364	0.476755	0.714676	1	0.57794	0.296263	0.125798	0.093978	0.031934	0.006387	0.000912	0.227894	0.524157	0.785779	1	0.044667	0.291705	0.44485	0.608022	0.979034	0.004558	0.099362	0.556974	0.842297	0.998177	0.519599	0.321168	0.005469	0.237922	0.476755	0.703737	0.996354	0.408387
0.28739	0.381232	0.331378	0.202941	0.170588	0.267647	0.01173	0.146628	0.42522	0.727273	1	0.005865	0.240469	0.489736	0.733138	0.991202	0.002933	0.29912	0.524927	0.753666	0.997067	0.451613	0.143695	0.404692	0.058824	0.076471	0	0.002933	0.190616	0.44868	0.788856	1	0.13783	0.208211	0.434018	0.71261	0.967742	0.014663	0.369501	0.557185	0.730205	0.947214	0.548387	0.376471	0.02346	0.304985	0.510264	0.730205	0.979472	0.392962
0.266667	0.442105	0.291228	0.295775	0.137324	0.246479	0.010526	0.22807	0.470175	0.782456	1	0.017544	0.238596	0.508772	0.750877	0.996491	0.003509	0.291228	0.484211	0.663158	0.989474	0.494737	0.119298	0.385965	0.052817	0.102113	0.017606	0.003509	0.178947	0.519298	0.803509	1	0.354386	0.484211	0.564912	0.824561	0.94386	0.049123	0.242105	0.396491	0.687719	0.898246	0.512281	0.380282	0.035088	0.298246	0.494737	0.680702	0.989474	0.484211
0.324324	0.341216	0.334459	0.230118	0.21489	0.247039	0.005068	0.263514	0.528716	0.777027	1	0.003378	0.238176	0.503378	0.746622	0.998311	0.001689	0.22973	0.45777	0.717905	0.993243	0.527027	0.157095	0.315878	0.067682	0.067682	0.010152	0.001689	0.219595	0.456081	0.760135	1	0.025338	0.190878	0.271959	0.508446	0.75	0.006757	0.358108	0.609797	0.800676	0.956081	0.533784	0.277496	0.006757	0.278716	0.538851	0.741554	0.983108	0.385135
0.298295	0.428977	0.272727	0.236467	0.188034	0.253561	0.017045	0.25	0.511364	0.732955	1	0.005682	0.215909	0.482955	0.761364	0.997159	0.002841	0.284091	0.488636	0.690341	0.977273	0.508523	0.491477	0	0.176638	0	0	0.002841	0.235795	0.482955	0.747159	1	0.03125	0.258523	0.497159	0.744318	0.980114	0	0	0	0	0	0.596591	0.37037	0.008523	0.261364	0.494318	0.732955	0.982955	0.457386
0.28882	0.381988	0.329193	0.211838	0.199377	0.23676	0.006211	0.164596	0.400621	0.729814	0.990683	0.009317	0.236025	0.506211	0.714286	0.993789	0.003106	0.310559	0.562112	0.773292	1	0.428571	0.086957	0.484472	0.034268	0.096573	0.003115	0.003106	0.208075	0.357143	0.590062	1	0.080745	0.118012	0.276398	0.332298	0.726708	0.02795	0.437888	0.63354	0.850932	0.996894	0.5	0.386293	0.018634	0.338509	0.583851	0.748447	0.987578	0.413043
0.241135	0.427305	0.33156	0.207815	0.143872	0.268206	0.035461	0.195035	0.406028	0.671986	0.969858	0.005319	0.269504	0.537234	0.81383	0.987589	0.001773	0.25	0.489362	0.755319	1	0.492908	0.234043	0.27305	0.122558	0.069272	0.001776	0.001773	0.210993	0.485816	0.787234	1	0.003546	0.244681	0.730496	0.856383	0.996454	0.042553	0.296099	0.468085	0.593972	0.719858	0.659574	0.326821	0.003546	0.262411	0.51773	0.778369	0.998227	0.434397
0.30297	0.392079	0.30495	0.267857	0.180556	0.230159	0.005941	0.263366	0.49703	0.742574	0.99802	0.00396	0.209901	0.485149	0.778218	1	0.00198	0.281188	0.512871	0.706931	0.960396	0.554455	0.192079	0.253465	0.079365	0.059524	0.011905	0.00198	0.19802	0.425743	0.730693	1	0.013861	0.190099	0.332673	0.512871	0.790099	0.019802	0.546535	0.712871	0.849505	0.952475	0.512871	0.345238	0.009901	0.289109	0.544554	0.728713	0.950495	0.39802
0.331579	0.357895	0.310526	0.211082	0.237467	0.274406	0.005263	0.260526	0.473684	0.755263	0.997368	0.010526	0.2	0.476316	0.713158	0.989474	0.002632	0.281579	0.55	0.786842	1	0.713158	0.142105	0.144737	0.08971	0.063325	0	0.002632	0.263158	0.515789	0.752632	1	0.242105	0.360526	0.547368	0.792105	0.994737	0.005263	0.036842	0.131579	0.697368	0.984211	0.457895	0.51715	0.007895	0.226316	0.486842	0.728947	0.994737	0.328947
0.373134	0.338308	0.288557	0.295	0.205	0.18	0.014925	0.20398	0.477612	0.746269	0.985075	0.00995	0.313433	0.567164	0.81592	1	0.004975	0.248756	0.437811	0.651741	0.995025	0.497512	0.029851	0.472637	0.02	0.1	0	0.004975	0.348259	0.59204	0.845771	1	0.865672	0.865672	0.875622	0.880597	0.985075	0.049751	0.169154	0.432836	0.616915	0.840796	0.457711	0.38	0.049751	0.318408	0.562189	0.761194	0.99005	0.353234
0.294118	0.425606	0.280277	0.284722	0.166667	0.243056	0.00692	0.266436	0.474048	0.705882	0.99308	0.010381	0.224913	0.49827	0.764706	0.975779	0.00346	0.235294	0.484429	0.750865	1	0.377163	0.477509	0.145329	0.097222	0.034722	0	0.00346	0.231834	0.442907	0.743945	1	0.183391	0.397924	0.560554	0.792388	0.982699	0.013841	0.044983	0.083045	0.148789	0.733564	0.508651	0.489583	0.013841	0.235294	0.467128	0.747405	1	0.377163
0.444444	0.240741	0.314815	0.273292	0.26087	0.136646	0.012346	0.265432	0.444444	0.623457	0.993827	0.030864	0.240741	0.506173	0.734568	0.962963	0.006173	0.179012	0.635802	0.82716	1	0.462963	0.265432	0.271605	0.10559	0.043478	0.006211	0.006173	0.401235	0.518519	0.722222	1	0.030864	0.635802	0.746914	0.845679	0.950617	0.061728	0.123457	0.277778	0.345679	0.987654	0.41358	0.385093	0.018519	0.209877	0.660494	0.833333	0.981481	0.271605
0.297989	0.407678	0.294333	0.221612	0.177656	0.236264	0.003656	0.223035	0.431444	0.702011	0.989031	0.009141	0.254113	0.566728	0.767824	0.998172	0.001828	0.263254	0.486289	0.731261	1	0.628885	0.095064	0.276051	0.045788	0.089744	0.001832	0.001828	0.321755	0.561243	0.764168	1	0.005484	0.065814	0.184644	0.550274	0.934186	0.126143	0.252285	0.35649	0.716636	0.974406	0.535649	0.32967	0.007313	0.255941	0.535649	0.73309	0.994516	0.391225
0.294574	0.320413	0.385013	0.165803	0.248705	0.261658	0.005168	0.260982	0.542636	0.780362	0.976744	0.010336	0.232558	0.478036	0.674419	1	0.002584	0.263566	0.488372	0.74677	0.997416	0.385013	0.268734	0.346253	0.080311	0.080311	0.018135	0.002584	0.209302	0.483204	0.726098	1	0.211886	0.320413	0.542636	0.824289	0.992248	0.020672	0.147287	0.434109	0.710594	0.966408	0.540052	0.435233	0.020672	0.250646	0.4677	0.697674	0.989664	0.335917
0.209262	0.396226	0.394511	0.170103	0.152921	0.321306	0.005146	0.226415	0.418525	0.785592	0.994854	0.003431	0.246998	0.480274	0.723842	0.998285	0.001715	0.26072	0.545455	0.756432	1	0.439108	0.048027	0.512864	0.030928	0.061856	0	0.001715	0.207547	0.35506	0.571184	1	0.09777	0.284734	0.560892	0.708405	0.951973	0.005146	0.418525	0.620926	0.797599	0.977702	0.590051	0.305842	0.006861	0.255575	0.562607	0.754717	0.979417	0.409949
0.283951	0.395062	0.320988	0.219081	0.201413	0.265018	0.005291	0.252205	0.488536	0.730159	0.996473	0.003527	0.255732	0.529101	0.740741	0.992945	0.001764	0.234568	0.458554	0.761905	1	0.42328	0.134039	0.442681	0.065371	0.072438	0.001767	0.001764	0.308642	0.552028	0.719577	1	0.007055	0.056437	0.805996	0.862434	0.998236	0.07231	0.218695	0.417989	0.708995	0.971781	0.659612	0.314488	0.008818	0.209877	0.463845	0.746032	0.998236	0.398589
0.406977	0.328488	0.264535	0.260553	0.195051	0.176128	0.00436	0.261628	0.468023	0.696221	1	0.002907	0.197674	0.484012	0.736919	0.997093	0.001453	0.334302	0.598837	0.792151	0.992733	0.505814	0.119186	0.375	0.053857	0.077147	0.007278	0.001453	0.184593	0.49564	0.786337	1	0.007267	0.132267	0.611919	0.694767	0.818314	0.031977	0.356105	0.478198	0.752907	0.994186	0.375	0.346434	0.007267	0.324128	0.639535	0.809593	0.992733	0.359012
0.145	0.675	0.18	0.18593	0.055276	0.246231	0.085	0.335	0.405	0.53	0.94	0.01	0.215	0.52	0.795	0.995	0.005	0.24	0.54	0.715	1	0.635	0.155	0.21	0.050251	0.100503	0	0.005	0.235	0.48	0.72	1	0.295	0.385	0.45	0.515	0.58	0.035	0.18	0.785	0.865	0.98	0.635	0.281407	0.015	0.175	0.565	0.83	0.995	0.615
0.308824	0.384804	0.306373	0.248157	0.186732	0.218673	0.007353	0.232843	0.460784	0.759804	1	0.004902	0.237745	0.504902	0.732843	0.987745	0.002451	0.281863	0.52451	0.737745	0.995098	0.487745	0.186275	0.32598	0.066339	0.071253	0.007371	0.002451	0.262255	0.504902	0.727941	1	0.071078	0.198529	0.509804	0.676471	0.992647	0.04902	0.242647	0.428922	0.769608	0.948529	0.637255	0.348894	0.017157	0.286765	0.52451	0.75	0.995098	0.414216
0.30531	0.387168	0.307522	0.223947	0.179601	0.248337	0.013274	0.243363	0.495575	0.785398	0.995575	0.004425	0.254425	0.486726	0.738938	1	0.002212	0.227876	0.502212	0.730088	0.997788	0.524336	0.128319	0.347345	0.066519	0.070953	0	0.002212	0.252212	0.535398	0.789823	1	0.073009	0.163717	0.539823	0.853982	0.960177	0.011062	0.261062	0.402655	0.634956	0.995575	0.586283	0.403548	0.015487	0.254425	0.497788	0.734513	0.993363	0.369469
0.490909	0.218182	0.290909	0.201835	0.284404	0.165138	0.027273	0.309091	0.581818	0.781818	1	0.045455	0.236364	0.345455	0.554545	0.927273	0.009091	0.163636	0.418182	0.745455	0.990909	0.154545	0	0.845455	0	0.073394	0	0.009091	0.318182	0.418182	0.827273	1	0	0	0	0	0	0.018182	0.218182	0.5	0.709091	0.972727	0.427273	0.477064	0.072727	0.263636	0.454545	0.645455	0.963636	0.218182
0.368613	0.317518	0.313869	0.205128	0.252747	0.190476	0.007299	0.222628	0.456204	0.635036	1	0.025547	0.284672	0.558394	0.759124	0.99635	0.00365	0.20438	0.514599	0.791971	0.989051	0.551095	0.215328	0.233577	0.076923	0.069597	0.003663	0.00365	0.288321	0.507299	0.744526	1	0.076642	0.251825	0.645985	0.868613	0.989051	0.040146	0.182482	0.481752	0.591241	0.817518	0.478102	0.373626	0.014599	0.208029	0.514599	0.791971	0.992701	0.375912
0.358255	0.271028	0.370717	0.203125	0.278125	0.2	0.012461	0.239875	0.489097	0.785047	0.996885	0.05296	0.211838	0.520249	0.713396	1	0.003115	0.252336	0.47352	0.732087	0.993769	0.323988	0.105919	0.570093	0.0375	0.1	0.00625	0.003115	0.193146	0.445483	0.719626	1	0.071651	0.158879	0.451713	0.542056	0.925234	0.015576	0.271028	0.510903	0.772586	0.993769	0.535826	0.44375	0.015576	0.221184	0.507788	0.722741	0.993769	0.258567
0.369697	0.254545	0.375758	0.146341	0.292683	0.152439	0.012121	0.254545	0.49697	0.775758	0.987879	0.09697	0.260606	0.466667	0.630303	1	0.006061	0.193939	0.521212	0.751515	0.993939	0.4	0.181818	0.418182	0.060976	0.060976	0.012195	0.006061	0.387879	0.49697	0.660606	1	0.018182	0.272727	0.587879	0.751515	0.939394	0.036364	0.157576	0.327273	0.727273	0.878788	0.521212	0.402439	0.018182	0.2	0.436364	0.684848	0.975758	0.254545
0.244898	0.456633	0.298469	0.214834	0.143223	0.2711	0.022959	0.25	0.5	0.732143	0.989796	0.007653	0.219388	0.461735	0.737245	0.994898	0.002551	0.262755	0.517857	0.760204	1	0.515306	0.242347	0.242347	0.120205	0.053708	0.007673	0.002551	0.181122	0.326531	0.683673	1	0.005102	0.329082	0.517857	0.818878	0.987245	0.045918	0.420918	0.630102	0.721939	0.971939	0.566327	0.378517	0.010204	0.262755	0.522959	0.762755	0.992347	0.469388
0.165548	0.416107	0.418345	0.143498	0.116592	0.367713	0.008949	0.279642	0.525727	0.689038	0.948546	0.006711	0.270694	0.501119	0.747204	0.995526	0.002237	0.223714	0.463087	0.758389	1	0.241611	0.03132	0.727069	0.015695	0.105381	0.002242	0.002237	0.364653	0.485459	0.691275	1	0.489933	0.494407	0.702461	0.812081	0.836689	0.004474	0.219239	0.472036	0.760626	0.997763	0.747204	0.233184	0.004474	0.250559	0.474273	0.744966	0.96868	0.41387
0.26506	0.373494	0.361446	0.177419	0.149194	0.282258	0.028112	0.212851	0.353414	0.650602	1	0.016064	0.281124	0.546185	0.7751	0.995984	0.004016	0.220884	0.522088	0.714859	0.987952	0.385542	0.160643	0.453815	0.044355	0.076613	0.020161	0.004016	0.261044	0.381526	0.738956	1	0.104418	0.232932	0.714859	0.803213	0.97992	0.008032	0.188755	0.514056	0.678715	0.935743	0.566265	0.346774	0.008032	0.248996	0.542169	0.751004	0.987952	0.345382
0.377934	0.326291	0.295775	0.249412	0.24	0.202353	0.004695	0.248826	0.483568	0.7723	0.997653	0.00939	0.265258	0.514085	0.734742	0.99061	0.002347	0.206573	0.481221	0.725352	1	0.359155	0.077465	0.56338	0.035294	0.12	0.007059	0.002347	0.178404	0.319249	0.640845	1	0.053991	0.110329	0.164319	0.225352	0.767606	0.007042	0.413146	0.605634	0.802817	0.995305	0.450704	0.423529	0.007042	0.230047	0.492958	0.680751	0.985915	0.375587
0.315476	0.380952	0.303571	0.244776	0.19403	0.250746	0.005952	0.247024	0.491071	0.785714	1	0.008929	0.255952	0.520833	0.729167	0.997024	0.002976	0.214286	0.449405	0.708333	0.982143	0.434524	0.142857	0.422619	0.056716	0.074627	0.002985	0.002976	0.327381	0.535714	0.755952	1	0.270833	0.622024	0.866071	0.910714	0.979167	0.011905	0.113095	0.377976	0.571429	0.827381	0.550595	0.38209	0.020833	0.220238	0.502976	0.732143	0.985119	0.395833
0.368421	0.368421	0.263158	0.283186	0.176991	0.20354	0.061404	0.280702	0.491228	0.675439	0.991228	0.017544	0.27193	0.587719	0.77193	1	0.008772	0.149123	0.412281	0.622807	0.964912	0.403509	0.359649	0.236842	0.115044	0.061947	0.00885	0.008772	0.27193	0.561404	0.815789	1	0.035088	0.149123	0.263158	0.622807	0.947368	0.324561	0.368421	0.429825	0.798246	0.877193	0.429825	0.353982	0.026316	0.192982	0.385965	0.684211	0.938596	0.350877
0.431818	0.357955	0.210227	0.268571	0.234286	0.137143	0.017045	0.397727	0.551136	0.755682	0.982955	0.011364	0.147727	0.301136	0.602273	1	0.005682	0.215909	0.630682	0.806818	0.994318	0.4375	0.028409	0.534091	0.017143	0.062857	0.017143	0.005682	0.107955	0.272727	0.863636	1	0.210227	0.210227	0.215909	0.221591	0.982955	0.136364	0.448864	0.585227	0.721591	0.988636	0.414773	0.434286	0.028409	0.130682	0.409091	0.704545	0.977273	0.357955
0.3	0.435417	0.264583	0.235908	0.152401	0.22547	0.008333	0.285417	0.5	0.7625	0.991667	0.004167	0.20625	0.464583	0.75625	1	0.002083	0.204167	0.520833	0.720833	0.995833	0.554167	0.204167	0.241667	0.064718	0.060543	0.006263	0.002083	0.214583	0.508333	0.766667	1	0.01875	0.4875	0.639583	0.754167	0.927083	0.045833	0.2	0.29375	0.7375	0.99375	0.483333	0.371608	0.010417	0.175	0.391667	0.685417	0.995833	0.447917
0.351027	0.275685	0.373288	0.19554	0.207547	0.198971	0.006849	0.361301	0.672945	0.791096	1	0.003425	0.205479	0.491438	0.767123	0.988014	0.001712	0.234589	0.390411	0.561644	0.994863	0.392123	0.003425	0.604452	0.003431	0.089194	0	0.001712	0.231164	0.638699	0.768836	1	0.929795	0.929795	0.929795	0.929795	0.931507	0.005137	0.251712	0.429795	0.660959	0.993151	0.517123	0.329331	0.013699	0.268836	0.440068	0.679795	0.994863	0.291096
0.370787	0.247191	0.382022	0.204545	0.25	0.193182	0.022472	0.325843	0.550562	0.719101	0.988764	0.089888	0.269663	0.52809	0.764045	1	0.011236	0.157303	0.359551	0.617978	0.955056	0.573034	0.089888	0.337079	0.034091	0.034091	0.011364	0.011236	0.449438	0.707865	0.853933	1	0.05618	0.067416	0.089888	0.573034	0.595506	0.101124	0.168539	0.258427	0.337079	0.685393	0.404494	0.431818	0.05618	0.179775	0.325843	0.617978	0.955056	0.325843
0.387387	0.283784	0.328829	0.199095	0.239819	0.190045	0.013514	0.198198	0.518018	0.788288	1	0.009009	0.238739	0.427928	0.702703	0.981982	0.004505	0.247748	0.522523	0.707207	0.963964	0.324324	0.112613	0.563063	0.045249	0.063348	0.00905	0.004505	0.157658	0.698198	0.869369	1	0.018018	0.040541	0.734234	0.891892	0.941441	0.063063	0.27027	0.418919	0.612613	0.833333	0.527027	0.41629	0.018018	0.279279	0.509009	0.689189	0.945946	0.297297
0.207977	0.333333	0.458689	0.148571	0.205714	0.288571	0.008547	0.293447	0.566952	0.846154	0.988604	0.005698	0.207977	0.438746	0.74359	1	0.002849	0.247863	0.507123	0.720798	0.994302	0.188034	0.037037	0.774929	0.011429	0.057143	0	0.002849	0.079772	0.424501	0.649573	1	0.518519	0.524217	0.532764	0.920228	0.931624	0.042735	0.247863	0.490028	0.749288	0.980057	0.712251	0.2	0.034188	0.247863	0.464387	0.717949	0.980057	0.316239
0.290909	0.454545	0.254545	0.256881	0.119266	0.238532	0.1	0.263636	0.372727	0.718182	1	0.018182	0.227273	0.518182	0.709091	0.990909	0.009091	0.181818	0.545455	0.809091	0.972727	0.718182	0.036364	0.245455	0	0.091743	0.018349	0.009091	0.354545	0.545455	0.809091	1	0.081818	0.081818	0.090909	0.1	0.109091	0.072727	0.154545	0.272727	0.718182	0.872727	0.445455	0.40367	0.045455	0.163636	0.5	0.709091	0.972727	0.418182
0.344051	0.327974	0.327974	0.258065	0.216129	0.187097	0.012862	0.276527	0.553055	0.77492	1	0.006431	0.212219	0.418006	0.720257	0.967846	0.003215	0.241158	0.482315	0.723473	0.987138	0.424437	0.154341	0.421222	0.058065	0.109677	0.006452	0.003215	0.167203	0.356913	0.726688	1	0.080386	0.122186	0.37299	0.466238	0.903537	0.041801	0.40836	0.598071	0.768489	0.990354	0.614148	0.374194	0.025723	0.257235	0.472669	0.749196	0.983923	0.318328
0.190871	0.319502	0.489627	0.083333	0.166667	0.333333	0.024896	0.253112	0.543568	0.647303	0.958506	0.016598	0.315353	0.551867	0.784232	0.995851	0.004149	0.20332	0.460581	0.726141	1	0.165975	0.058091	0.775934	0.0125	0.0625	0.004167	0.004149	0.278008	0.572614	0.817427	1	0.186722	0.195021	0.211618	0.970954	0.987552	0.008299	0.253112	0.46888	0.713693	0.958506	0.738589	0.233333	0.016598	0.219917	0.452282	0.738589	0.987552	0.286307
0.385321	0.293578	0.321101	0.203704	0.277778	0.166667	0.027523	0.192661	0.486239	0.669725	0.944954	0.036697	0.33945	0.458716	0.834862	0.981651	0.009174	0.174312	0.504587	0.697248	1	0.284404	0.174312	0.541284	0.055556	0.074074	0	0.009174	0.06422	0.46789	0.926606	1	0.311927	0.33945	0.422018	0.495413	0.541284	0.082569	0.201835	0.633028	0.770642	0.908257	0.422018	0.5	0.082569	0.302752	0.495413	0.706422	0.963303	0.330275
0.365385	0.362179	0.272436	0.221865	0.234727	0.209003	0.012821	0.189103	0.426282	0.673077	0.939103	0.00641	0.282051	0.512821	0.807692	0.996795	0.003205	0.259615	0.519231	0.746795	1	0.349359	0.012821	0.637821	0.012862	0.096463	0	0.003205	0.185897	0.567308	0.820513	1	0.012821	0.012821	0.016026	0.019231	0.846154	0.080128	0.25641	0.480769	0.708333	0.996795	0.50641	0.450161	0.016026	0.269231	0.487179	0.721154	0.987179	0.346154
0.362637	0.395604	0.241758	0.231087	0.165062	0.185695	0.012363	0.245879	0.53022	0.798077	0.995879	0.002747	0.258242	0.483516	0.744505	1	0.001374	0.229396	0.458791	0.718407	0.990385	0.532967	0.093407	0.373626	0.031637	0.089409	0.004127	0.001374	0.201923	0.467033	0.712912	1	0.016484	0.228022	0.302198	0.417582	0.968407	0.050824	0.373626	0.618132	0.842033	0.991758	0.394231	0.34663	0.013736	0.247253	0.417582	0.723901	0.987637	0.425824
0.350806	0.314516	0.334677	0.194332	0.251012	0.206478	0.03629	0.266129	0.544355	0.754032	0.995968	0.012097	0.21371	0.467742	0.774194	1	0.004032	0.209677	0.455645	0.729839	0.991935	0.415323	0.112903	0.471774	0.05668	0.089069	0.008097	0.004032	0.21371	0.483871	0.762097	1	0.008065	0.5	0.729839	0.794355	0.995968	0.100806	0.233871	0.427419	0.685484	0.907258	0.544355	0.42915	0.008065	0.270161	0.471774	0.729839	0.987903	0.282258
0.292887	0.351464	0.355649	0.201681	0.189076	0.252101	0.012552	0.288703	0.531381	0.761506	1	0.033473	0.271967	0.476987	0.769874	0.995816	0.004184	0.146444	0.485356	0.694561	0.974895	0.422594	0.087866	0.48954	0.037815	0.071429	0.004202	0.004184	0.251046	0.51046	0.849372	1	0.196653	0.213389	0.368201	0.594142	0.694561	0.008368	0.125523	0.476987	0.736402	0.987448	0.631799	0.310924	0.020921	0.221757	0.493724	0.732218	0.974895	0.343096
0.354201	0.326194	0.319605	0.240924	0.232673	0.214521	0.004942	0.247117	0.530478	0.734761	1	0.014827	0.271829	0.495881	0.762768	0.995058	0.001647	0.23229	0.476112	0.728171	0.975288	0.443163	0.273476	0.283361	0.10231	0.056106	0.0033	0.001647	0.283361	0.487644	0.757825	1	0.011532	0.359143	0.507414	0.726524	0.955519	0.003295	0.14168	0.545305	0.749588	0.99341	0.570016	0.366337	0.008237	0.2257	0.474465	0.731466	0.975288	0.377265
0.299363	0.401274	0.299363	0.282051	0.153846	0.224359	0.025478	0.312102	0.630573	0.828025	0.993631	0.012739	0.248408	0.477707	0.707006	1	0.006369	0.127389	0.363057	0.66242	0.974522	0.503185	0.242038	0.254777	0.096154	0.083333	0.00641	0.006369	0.242038	0.687898	0.853503	1	0.025478	0.261146	0.573248	0.66879	0.974522	0.044586	0.133758	0.356688	0.490446	0.643312	0.496815	0.384615	0.012739	0.184713	0.433121	0.649682	0.974522	0.382166
0.362694	0.321244	0.316062	0.166667	0.21875	0.223958	0.015544	0.341969	0.559585	0.709845	0.989637	0.010363	0.150259	0.46114	0.818653	1	0.005181	0.207254	0.450777	0.658031	0.994819	0.373057	0.139896	0.487047	0.0625	0.09375	0	0.005181	0.243523	0.595855	0.829016	1	0.031088	0.056995	0.450777	0.512953	0.813472	0.093264	0.26943	0.544041	0.689119	0.979275	0.544041	0.385417	0.025907	0.186528	0.430052	0.642487	0.917098	0.336788
0.302817	0.366197	0.330986	0.215548	0.183746	0.272085	0.007042	0.257042	0.514085	0.760563	1	0.028169	0.264085	0.5	0.742958	0.992958	0.003521	0.225352	0.46831	0.71831	0.985915	0.485915	0.242958	0.271127	0.088339	0.067138	0.017668	0.003521	0.253521	0.478873	0.806338	1	0.014085	0.320423	0.56338	0.721831	0.982394	0.028169	0.190141	0.366197	0.683099	0.848592	0.605634	0.381625	0.014085	0.242958	0.514085	0.728873	0.985915	0.366197
0.260241	0.431325	0.308434	0.219807	0.157005	0.299517	0.012048	0.320482	0.559036	0.780723	0.99759	0.004819	0.219277	0.46747	0.73253	1	0.00241	0.250602	0.491566	0.744578	0.971084	0.438554	0.214458	0.346988	0.074879	0.074879	0.002415	0.00241	0.257831	0.515663	0.766265	1	0.024096	0.308434	0.503614	0.790361	0.973494	0.053012	0.212048	0.4	0.703614	0.891566	0.631325	0.347826	0.021687	0.26988	0.503614	0.742169	0.990361	0.474699
0.411303	0.324961	0.263736	0.22956	0.261006	0.158805	0.025118	0.33752	0.598116	0.77394	0.99843	0.00314	0.229199	0.389325	0.642072	1	0.00157	0.189953	0.475667	0.751962	0.99686	0.3281	0.036107	0.635793	0.015723	0.037736	0.003145	0.00157	0.167975	0.257457	0.354788	1	0.054945	0.10832	0.127159	0.326531	0.99686	0.015699	0.494505	0.66719	0.825746	0.985871	0.367347	0.446541	0.009419	0.166405	0.33752	0.657771	0.99686	0.378336
0.220264	0.515419	0.264317	0.234513	0.09292	0.269912	0.022026	0.352423	0.493392	0.770925	0.973568	0.008811	0.193833	0.453744	0.726872	0.991189	0.004405	0.286344	0.563877	0.735683	1	0.674009	0.048458	0.277533	0.026549	0.070796	0	0.004405	0.189427	0.488987	0.722467	1	0.15859	0.162996	0.176211	0.559471	0.951542	0.211454	0.277533	0.61674	0.784141	0.907489	0.528634	0.415929	0.013216	0.273128	0.572687	0.779736	0.995595	0.519824
0.283146	0.391011	0.325843	0.220721	0.184685	0.261261	0.008989	0.25618	0.501124	0.782022	0.991011	0.004494	0.21573	0.469663	0.692135	0.997753	0.002247	0.269663	0.523596	0.761798	1	0.431461	0.177528	0.391011	0.087838	0.060811	0.006757	0.002247	0.233708	0.420225	0.67191	1	0.060674	0.188764	0.478652	0.658427	0.932584	0.011236	0.262921	0.602247	0.78427	0.993258	0.680899	0.297297	0.011236	0.258427	0.503371	0.707865	0.986517	0.395506
0.417178	0.257669	0.325153	0.216049	0.290123	0.166667	0.018405	0.208589	0.392638	0.693252	0.993865	0.01227	0.300613	0.539877	0.748466	0.96319	0.006135	0.282209	0.533742	0.791411	1	0.429448	0.349693	0.220859	0.117284	0.030864	0.018519	0.006135	0.251534	0.460123	0.674847	1	0.06135	0.331288	0.484663	0.846626	0.98773	0.116564	0.165644	0.595092	0.773006	0.93865	0.453988	0.493827	0.067485	0.325153	0.576687	0.815951	0.98773	0.325153
0.308765	0.346614	0.344622	0.211577	0.185629	0.259481	0.049801	0.270916	0.549801	0.796813	1	0.005976	0.227092	0.462151	0.715139	0.982072	0.001992	0.237052	0.474104	0.729084	0.994024	0.394422	0.087649	0.517928	0.043912	0.0998	0	0.001992	0.241036	0.577689	0.836653	1	0.085657	0.169323	0.7749	0.868526	0.996016	0.003984	0.268924	0.456175	0.629482	0.926295	0.601594	0.37525	0.005976	0.247012	0.494024	0.727092	0.992032	0.36255
0.335821	0.375	0.289179	0.269159	0.194393	0.254206	0.005597	0.23694	0.481343	0.73694	0.994403	0.003731	0.240672	0.494403	0.766791	0.998134	0.001866	0.255597	0.520522	0.746269	1	0.360075	0.098881	0.541045	0.04486	0.082243	0.007477	0.001866	0.276119	0.460821	0.686567	1	0.156716	0.309701	0.408582	0.475746	0.796642	0.005597	0.220149	0.574627	0.785448	0.98694	0.554104	0.42243	0.014925	0.253731	0.501866	0.740672	0.992537	0.395522
0.309842	0.388821	0.301337	0.229927	0.195864	0.234793	0.006075	0.208991	0.504253	0.72661	0.99514	0.00243	0.221142	0.472661	0.753341	0.998785	0.001215	0.321993	0.533414	0.760632	1	0.532199	0.140948	0.326853	0.077859	0.077859	0.007299	0.001215	0.216282	0.449575	0.72418	1	0.041312	0.315917	0.72175	0.804374	0.964763	0.032807	0.291616	0.545565	0.686513	0.99757	0.573512	0.367397	0.017011	0.320778	0.512758	0.767922	0.996355	0.408262
0.25784	0.404181	0.337979	0.251748	0.13986	0.272727	0.013937	0.226481	0.428571	0.616725	0.993031	0.02439	0.33101	0.599303	0.766551	0.996516	0.003484	0.212544	0.43554	0.724739	1	0.557491	0.303136	0.139373	0.104895	0.041958	0.013986	0.003484	0.250871	0.466899	0.749129	1	0.038328	0.212544	0.54007	0.707317	0.982578	0.034843	0.114983	0.620209	0.867596	0.902439	0.61324	0.293706	0.010453	0.275261	0.498258	0.773519	0.989547	0.418118
0.230964	0.36802	0.401015	0.167939	0.155216	0.315522	0.007614	0.230964	0.558376	0.850254	1	0.01269	0.236041	0.48731	0.751269	0.989848	0.002538	0.256345	0.479695	0.677665	0.994924	0.373096	0.119289	0.507614	0.058524	0.048346	0.007634	0.002538	0.230964	0.568528	0.873096	1	0.020305	0.045685	0.121827	0.649746	0.982234	0.017766	0.281726	0.464467	0.672589	0.959391	0.664975	0.274809	0.015228	0.258883	0.472081	0.687817	0.982234	0.35533
0.287572	0.426301	0.286127	0.240232	0.170767	0.269175	0.007225	0.216763	0.416185	0.66763	0.988439	0.00289	0.310694	0.58237	0.802023	0.99711	0.001445	0.212428	0.432081	0.712428	1	0.65896	0.041908	0.299133	0.026049	0.049204	0	0.001445	0.452312	0.651734	0.82659	1	0.171965	0.468208	0.618497	0.822254	0.947977	0.00578	0.112717	0.270231	0.367052	0.674855	0.508671	0.370478	0.00578	0.225434	0.456647	0.75578	0.99422	0.445087
0.264484	0.460957	0.274559	0.229798	0.166667	0.265152	0.005038	0.24937	0.508816	0.770781	1	0.010076	0.264484	0.478589	0.730479	0.997481	0.002519	0.214106	0.498741	0.763224	0.994962	0.518892	0.324937	0.156171	0.131313	0.050505	0.005051	0.002519	0.241814	0.481108	0.765743	1	0.153652	0.347607	0.584383	0.760705	0.987406	0.020151	0.060453	0.148615	0.695214	0.916877	0.607053	0.368687	0.007557	0.282116	0.496222	0.748111	0.994962	0.488665
0.326241	0.35461	0.319149	0.228571	0.271429	0.214286	0.007092	0.212766	0.425532	0.680851	1	0.028369	0.276596	0.51773	0.737589	0.992908	0.014184	0.22695	0.510638	0.787234	0.985816	0.276596	0.007092	0.716312	0.014286	0.1	0	0.007092	0.163121	0.382979	0.843972	1	0.907801	0.907801	0.907801	0.907801	0.907801	0.028369	0.241135	0.503546	0.730496	0.992908	0.425532	0.485714	0.070922	0.326241	0.524823	0.780142	0.985816	0.382979
0.290155	0.393782	0.316062	0.197917	0.192708	0.28125	0.010363	0.186528	0.409326	0.875648	1	0.051813	0.290155	0.523316	0.766839	0.974093	0.005181	0.227979	0.476684	0.678756	0.984456	0.549223	0.357513	0.093264	0.145833	0.041667	0	0.005181	0.284974	0.569948	0.860104	1	0.088083	0.264249	0.497409	0.699482	0.839378	0.025907	0.041451	0.067358	0.326425	0.590674	0.549223	0.333333	0.020725	0.259067	0.533679	0.678756	0.984456	0.445596
0.408935	0.297251	0.293814	0.222031	0.251291	0.170396	0.006873	0.176976	0.493127	0.742268	1	0.003436	0.235395	0.450172	0.726804	0.975945	0.001718	0.328179	0.544674	0.754296	0.998282	0.415808	0.063574	0.520619	0.032702	0.056799	0.001721	0.001718	0.121993	0.25945	0.469072	1	0.015464	0.206186	0.24055	0.290378	0.833333	0.041237	0.527491	0.666667	0.865979	0.996564	0.357388	0.409639	0.012027	0.305842	0.542955	0.719931	0.986254	0.33677
0.26087	0.42029	0.318841	0.221818	0.178182	0.301818	0.014493	0.257246	0.467391	0.76087	0.992754	0.007246	0.221014	0.485507	0.721014	0.981884	0.003623	0.278986	0.536232	0.768116	1	0.268116	0	0.731884	0	0.123636	0	0.003623	0.155797	0.376812	0.648551	1	0	0	0	0	0	0.021739	0.293478	0.528986	0.775362	0.996377	0.507246	0.407273	0.028986	0.289855	0.521739	0.75	0.996377	0.431159
0.266667	0.504762	0.228571	0.269231	0.144231	0.230769	0.028571	0.342857	0.647619	0.771429	1	0.019048	0.247619	0.457143	0.714286	0.990476	0.009524	0.209524	0.419048	0.657143	0.961905	0.609524	0.190476	0.2	0.057692	0.038462	0	0.009524	0.380952	0.533333	0.847619	1	0.171429	0.209524	0.285714	0.333333	0.790476	0.028571	0.066667	0.542857	0.590476	0.647619	0.466667	0.269231	0.038095	0.209524	0.4	0.657143	0.961905	0.561905
0.133603	0.340081	0.526316	0.081136	0.105477	0.40568	0.012146	0.253036	0.548583	0.728745	0.997976	0.008097	0.267206	0.479757	0.734818	0.989879	0.002024	0.236842	0.506073	0.769231	1	0.251012	0.091093	0.657895	0.034483	0.083164	0.018256	0.002024	0.206478	0.479757	0.787449	1	0.008097	0.137652	0.710526	0.888664	0.995951	0.036437	0.271255	0.5	0.676113	0.983806	0.821862	0.223124	0.008097	0.246964	0.491903	0.730769	0.993927	0.299595
0.299331	0.41806	0.282609	0.249581	0.177554	0.232831	0.013378	0.289298	0.5	0.755853	1	0.003344	0.214047	0.468227	0.740803	0.994983	0.001672	0.270903	0.523411	0.745819	0.998328	0.446488	0.280936	0.272575	0.117253	0.063652	0	0.001672	0.279264	0.593645	0.832776	1	0.018395	0.362876	0.491639	0.801003	0.998328	0.0301	0.170569	0.316054	0.535117	0.864548	0.603679	0.375209	0.01505	0.232441	0.473244	0.677258	0.998328	0.436455
0.322997	0.359173	0.317829	0.196891	0.215026	0.238342	0.005168	0.258398	0.50646	0.736434	1	0.023256	0.237726	0.490956	0.762274	0.984496	0.002584	0.229974	0.483204	0.715762	0.968992	0.50646	0.457364	0.036176	0.173575	0.012953	0.002591	0.002584	0.268734	0.521964	0.764858	1	0.036176	0.248062	0.483204	0.72093	0.968992	0.007752	0.01292	0.023256	0.984496	0.994832	0.565891	0.362694	0.010336	0.250646	0.483204	0.72093	0.984496	0.405685
0.272727	0.404545	0.322727	0.214612	0.196347	0.287671	0.009091	0.236364	0.454545	0.722727	0.963636	0.018182	0.272727	0.518182	0.745455	0.995455	0.004545	0.209091	0.45	0.740909	1	0.3	0.172727	0.527273	0.068493	0.09589	0.004566	0.004545	0.172727	0.468182	0.754545	1	0.009091	0.25	0.481818	0.590909	0.845455	0.045455	0.309091	0.540909	0.786364	0.977273	0.631818	0.374429	0.013636	0.272727	0.518182	0.745455	0.972727	0.422727
0.4	0.252632	0.347368	0.159574	0.308511	0.191489	0.063158	0.242105	0.473684	0.705263	0.989474	0.031579	0.410526	0.589474	0.8	1	0.010526	0.210526	0.421053	0.652632	0.978947	0.378947	0.178947	0.442105	0.06383	0.06383	0	0.010526	0.189474	0.347368	0.747368	1	0.284211	0.315789	0.621053	0.684211	0.736842	0.073684	0.378947	0.494737	0.873684	0.989474	0.431579	0.510638	0.052632	0.378947	0.578947	0.757895	0.978947	0.284211
0.307807	0.347955	0.344238	0.226935	0.212054	0.241815	0.001487	0.243123	0.451301	0.726394	0.99777	0.004461	0.26171	0.535316	0.780669	0.998513	0.000743	0.241636	0.503346	0.727881	1	0.440149	0.135316	0.424535	0.052827	0.091518	0.009673	0.000743	0.301859	0.55316	0.788104	1	0.036431	0.289963	0.481041	0.753903	0.951673	0.002974	0.178439	0.463941	0.720446	0.999257	0.69368	0.300595	0.007435	0.289963	0.530112	0.75539	0.999257	0.359108
0.349544	0.379939	0.270517	0.253049	0.170732	0.210366	0.006079	0.282675	0.531915	0.778116	1	0.015198	0.234043	0.480243	0.732523	0.993921	0.00304	0.227964	0.431611	0.696049	0.990881	0.31003	0.170213	0.519757	0.082317	0.112805	0.003049	0.00304	0.300912	0.452888	0.720365	1	0.06383	0.179331	0.364742	0.696049	0.911854	0.009119	0.209726	0.519757	0.790274	0.993921	0.604863	0.384146	0.012158	0.240122	0.471125	0.723404	0.990881	0.3769
0.335271	0.331395	0.333333	0.221359	0.229126	0.198058	0.003876	0.232558	0.463178	0.744186	0.996124	0.005814	0.267442	0.517442	0.734496	0.994186	0.001938	0.25	0.501938	0.757752	1	0.465116	0.153101	0.381783	0.056311	0.083495	0.009709	0.001938	0.207364	0.472868	0.717054	1	0.02907	0.110465	0.251938	0.507752	0.786822	0.032946	0.335271	0.686047	0.852713	0.99031	0.560078	0.361165	0.015504	0.25969	0.465116	0.71124	0.992248	0.337209
0.443831	0.320442	0.235727	0.287823	0.208487	0.162362	0.01105	0.246777	0.478821	0.73849	1	0.003683	0.302026	0.546961	0.793738	0.990792	0.001842	0.187845	0.456722	0.692449	0.992634	0.362799	0.066298	0.570902	0.02583	0.03321	0	0.001842	0.54512	0.707182	0.848987	1	0.519337	0.895028	0.922652	0.955801	0.990792	0.01105	0.171271	0.327808	0.469613	0.767956	0.38674	0.439114	0.005525	0.224678	0.460405	0.731123	0.992634	0.32965
0.321678	0.405594	0.272727	0.267606	0.169014	0.232394	0.055944	0.251748	0.601399	0.762238	0.972028	0.013986	0.216783	0.412587	0.692308	1	0.006993	0.237762	0.482517	0.699301	0.993007	0.433566	0.475524	0.090909	0.15493	0.028169	0	0.006993	0.244755	0.440559	0.657343	1	0.020979	0.174825	0.454545	0.811189	0.993007	0.671329	0.706294	0.727273	0.748252	0.776224	0.608392	0.338028	0.020979	0.223776	0.454545	0.636364	0.993007	0.384615
0.292072	0.456189	0.251739	0.239554	0.158774	0.185237	0.005563	0.207232	0.461752	0.732962	0.997218	0.004172	0.251739	0.463143	0.653686	1	0.001391	0.301808	0.646732	0.819193	0.991655	0.664812	0.102921	0.232267	0.050139	0.075209	0.008357	0.001391	0.244784	0.431154	0.596662	1	0.013908	0.082058	0.631433	0.707928	0.862309	0.05146	0.602225	0.760779	0.901252	0.997218	0.442281	0.370474	0.015299	0.253129	0.600834	0.802503	0.995828	0.433936
0.383648	0.273585	0.342767	0.211356	0.264984	0.179811	0.025157	0.264151	0.455975	0.795597	1	0.006289	0.213836	0.525157	0.698113	0.996855	0.003145	0.232704	0.484277	0.72956	0.981132	0.459119	0.213836	0.327044	0.078864	0.091483	0.009464	0.003145	0.245283	0.474843	0.751572	1	0.009434	0.22327	0.446541	0.688679	0.842767	0.078616	0.320755	0.528302	0.889937	0.990566	0.493711	0.429022	0.009434	0.301887	0.531447	0.713836	0.981132	0.305031
0.296178	0.343949	0.359873	0.214058	0.214058	0.246006	0.019108	0.257962	0.5	0.745223	0.993631	0.012739	0.232484	0.458599	0.700637	0.977707	0.003185	0.267516	0.509554	0.773885	1	0.525478	0.22293	0.251592	0.108626	0.063898	0	0.003185	0.273885	0.477707	0.738854	1	0.089172	0.312102	0.519108	0.773885	0.993631	0.015924	0.22293	0.388535	0.627389	0.847134	0.582803	0.364217	0.009554	0.264331	0.512739	0.732484	0.996815	0.378981
0.351085	0.360947	0.287968	0.258893	0.203557	0.175889	0.009862	0.2643	0.506903	0.773176	0.994083	0.003945	0.25641	0.564103	0.792899	0.998028	0.001972	0.213018	0.424063	0.625247	1	0.550296	0.063116	0.386588	0.029644	0.081028	0.005929	0.001972	0.211045	0.542406	0.798817	1	0.037475	0.067061	0.112426	0.524655	0.946746	0.078895	0.341223	0.485207	0.7357	0.964497	0.428008	0.335968	0.019724	0.220907	0.394477	0.579882	0.966469	0.35503
0.365256	0.289532	0.345212	0.191964	0.252232	0.227679	0.004454	0.300668	0.54343	0.7951	1	0.011136	0.209354	0.443207	0.739421	0.995546	0.002227	0.227171	0.469933	0.690423	0.988864	0.265033	0.131403	0.603563	0.049107	0.084821	0.008929	0.002227	0.2049	0.434298	0.652561	1	0.022272	0.126949	0.447661	0.587973	0.995546	0.006682	0.291759	0.532294	0.801782	0.986637	0.556793	0.419643	0.006682	0.229399	0.449889	0.679287	0.988864	0.276169
0.180357	0.423214	0.396429	0.157424	0.125224	0.309481	0.010714	0.271429	0.555357	0.830357	0.998214	0.007143	0.267857	0.501786	0.751786	1	0.001786	0.210714	0.455357	0.708929	0.985714	0.344643	0.078571	0.576786	0.035778	0.075134	0.003578	0.001786	0.323214	0.669643	0.848214	1	0.089286	0.478571	0.651786	0.876786	0.985714	0.003571	0.208929	0.383929	0.619643	0.9625	0.7875	0.175313	0.005357	0.233929	0.466071	0.698214	0.985714	0.403571
[truncated: 437 more rows]
[truncated: 83 more columns]
