# Supplementary material for: Prediction of RNA‐Binding Proteins by Voting Systems
Source: Hindawi journal article supplement (doi:10.1155/2011/506205), 2011-01-01
Supplement: f1 [file 506205.f1.zip › testSet5.csv]

v1	v2	v3	v4	v5	v6	v7	v8	v9	v10	v11	v12	v13	v14	v15	v16	v17	v18	v19	v20	v21	v22	v23	v24	v25	v26	v27	v28	v29	v30	v31	v32	v33	v34	v35	v36	v37	v38	v39	v40	v41	v42	v43	v44	v45	v46	v47	v48	v49	v50
0.364469	0.302198	0.333333	0.218349	0.269725	0.19633	0.005495	0.25641	0.489011	0.760073	0.996337	0.007326	0.203297	0.446886	0.736264	0.998168	0.001832	0.287546	0.529304	0.747253	1	0.342491	0.087912	0.569597	0.034862	0.104587	0.005505	0.001832	0.254579	0.470696	0.727106	1	0.043956	0.197802	0.239927	0.267399	0.377289	0.003663	0.362637	0.564103	0.800366	0.994505	0.569597	0.418349	0.003663	0.260073	0.483516	0.738095	0.998168	0.309524
0.372093	0.302326	0.325581	0.341176	0.211765	0.176471	0.034884	0.244186	0.523256	0.732558	1	0.023256	0.162791	0.395349	0.651163	0.988372	0.011628	0.313953	0.534884	0.755814	0.965116	0.348837	0.244186	0.406977	0.094118	0.047059	0	0.011628	0.244186	0.418605	0.906977	1	0.046512	0.337209	0.44186	0.5	0.604651	0.081395	0.162791	0.686047	0.790698	0.895349	0.430233	0.423529	0.046512	0.290698	0.453488	0.686047	0.965116	0.337209
0.346626	0.297546	0.355828	0.252308	0.246154	0.209231	0.015337	0.257669	0.493865	0.766871	0.98773	0.006135	0.315951	0.54908	0.730061	0.996933	0.003067	0.205521	0.46319	0.733129	1	0.52454	0.288344	0.187117	0.104615	0.049231	0.012308	0.003067	0.248466	0.530675	0.794479	1	0.009202	0.282209	0.555215	0.717791	0.92638	0.033742	0.101227	0.389571	0.52454	0.993865	0.515337	0.387692	0.01227	0.322086	0.518405	0.757669	0.993865	0.297546
0.388679	0.260377	0.350943	0.185606	0.333333	0.17803	0.007547	0.275472	0.490566	0.762264	1	0.033962	0.192453	0.543396	0.792453	0.973585	0.003774	0.25283	0.467925	0.690566	0.992453	0.309434	0.264151	0.426415	0.068182	0.060606	0.007576	0.003774	0.132075	0.498113	0.713208	1	0.05283	0.14717	0.29434	0.807547	0.988679	0.166038	0.396226	0.520755	0.739623	0.954717	0.475472	0.469697	0.011321	0.245283	0.509434	0.732075	0.981132	0.25283
0.332606	0.367503	0.299891	0.232533	0.20524	0.221616	0.004362	0.258451	0.507088	0.732824	1	0.002181	0.232279	0.529989	0.770992	0.997819	0.001091	0.245365	0.466739	0.726281	0.998909	0.417666	0.185387	0.396947	0.092795	0.076419	0.008734	0.001091	0.266085	0.544166	0.804798	0.996728	0.029444	0.220284	0.693566	0.865867	1	0.005453	0.25627	0.473282	0.603053	0.961832	0.502726	0.388646	0.005453	0.25627	0.454744	0.733915	0.996728	0.410033
0.428899	0.376147	0.194954	0.289655	0.195402	0.142529	0.011468	0.316514	0.582569	0.81422	1	0.004587	0.213303	0.465596	0.694954	0.995413	0.002294	0.21789	0.369266	0.619266	0.993119	0.798165	0.084862	0.116972	0.034483	0.057471	0.006897	0.002294	0.224771	0.516055	0.729358	1	0.018349	0.305046	0.401376	0.598624	0.993119	0.029817	0.272936	0.369266	0.87844	0.951835	0.380734	0.372414	0.018349	0.18578	0.348624	0.571101	0.993119	0.451835
0.433424	0.338315	0.228261	0.236735	0.165986	0.172789	0.002717	0.173913	0.360054	0.680707	0.991848	0.005435	0.302989	0.535326	0.797554	1	0.001359	0.403533	0.600543	0.773098	0.994565	0.494565	0.127717	0.377717	0.05034	0.088435	0.004082	0.001359	0.186141	0.394022	0.695652	1	0.016304	0.487772	0.701087	0.857337	0.997283	0.021739	0.308424	0.509511	0.767663	0.970109	0.451087	0.304762	0.01087	0.411685	0.58288	0.789402	0.997283	0.407609
0.337963	0.354167	0.30787	0.25522	0.206497	0.222738	0.020833	0.256944	0.5	0.777778	1	0.00463	0.219907	0.488426	0.726852	0.997685	0.002315	0.268519	0.50463	0.715278	0.99537	0.335648	0.150463	0.513889	0.064965	0.092807	0.009281	0.002315	0.206019	0.497685	0.810185	1	0.048611	0.284722	0.50463	0.928241	0.99537	0.018519	0.263889	0.481481	0.715278	0.907407	0.571759	0.37587	0.013889	0.252315	0.456019	0.69213	0.99537	0.358796
0.379971	0.33137	0.28866	0.255162	0.225664	0.171091	0.007364	0.21944	0.493373	0.75405	0.998527	0.004418	0.151694	0.427099	0.720177	1	0.001473	0.381443	0.578792	0.759941	0.995582	0.544919	0.142857	0.312224	0.048673	0.066372	0.007375	0.001473	0.148748	0.291605	0.628866	1	0.0162	0.509573	0.677467	0.801178	0.916053	0.125184	0.446244	0.606775	0.821797	0.989691	0.455081	0.327434	0.004418	0.416789	0.57732	0.78056	0.994109	0.37408
0.328859	0.42953	0.241611	0.256757	0.162162	0.182432	0.020134	0.255034	0.436242	0.691275	0.966443	0.013423	0.302013	0.57047	0.825503	1	0.006711	0.221477	0.469799	0.697987	0.986577	0.463087	0.154362	0.38255	0.054054	0.067568	0	0.006711	0.281879	0.57047	0.879195	1	0.221477	0.248322	0.342282	0.604027	0.85906	0.040268	0.134228	0.463087	0.704698	0.805369	0.389262	0.243243	0.026846	0.255034	0.442953	0.604027	0.845638	0.469799
0.341176	0.382353	0.276471	0.248521	0.236686	0.218935	0.023529	0.276471	0.582353	0.841176	0.994118	0.011765	0.170588	0.441176	0.705882	1	0.005882	0.205882	0.411765	0.7	0.970588	0.376471	0.170588	0.452941	0.059172	0.08284	0	0.005882	0.141176	0.364706	0.582353	1	0.023529	0.058824	0.335294	0.4	0.805882	0.135294	0.441176	0.688235	0.852941	0.988235	0.417647	0.508876	0.029412	0.229412	0.441176	0.717647	0.970588	0.417647
0.4	0.363636	0.236364	0.259259	0.185185	0.111111	0.054545	0.236364	0.581818	0.745455	0.981818	0.036364	0.272727	0.381818	0.563636	0.854545	0.018182	0.163636	0.363636	0.781818	1	0.509091	0.490909	0	0.148148	0	0	0.018182	0.290909	0.509091	0.709091	1	0.127273	0.218182	0.418182	0.818182	0.945455	0	0	0	0	0	0.327273	0.407407	0.163636	0.254545	0.418182	0.672727	0.909091	0.327273
0.327434	0.376106	0.29646	0.262222	0.213333	0.226667	0.00885	0.225664	0.469027	0.716814	1	0.013274	0.230088	0.495575	0.743363	0.995575	0.004425	0.265487	0.513274	0.747788	0.99115	0.464602	0.216814	0.318584	0.097778	0.08	0	0.004425	0.163717	0.393805	0.716814	1	0.088496	0.256637	0.49115	0.752212	0.973451	0.017699	0.371681	0.539823	0.787611	0.99115	0.460177	0.462222	0.017699	0.269912	0.495575	0.738938	0.973451	0.402655
0.410345	0.258621	0.331034	0.197232	0.276817	0.16263	0.006897	0.341379	0.544828	0.782759	1	0.010345	0.12069	0.37931	0.675862	0.910345	0.003448	0.248276	0.451724	0.765517	0.996552	0.396552	0.251724	0.351724	0.083045	0.062284	0	0.003448	0.203448	0.482759	0.631034	1	0.013793	0.17931	0.496552	0.775862	0.944828	0.055172	0.344828	0.544828	0.696552	0.993103	0.565517	0.366782	0.010345	0.210345	0.465517	0.713793	0.993103	0.265517
0.371981	0.277778	0.350242	0.174334	0.268765	0.227603	0.007246	0.248792	0.504831	0.777778	1	0.004831	0.21256	0.495169	0.710145	0.997585	0.002415	0.253623	0.485507	0.7343	0.995169	0.342995	0.13285	0.524155	0.067797	0.11138	0.004843	0.002415	0.21256	0.543478	0.818841	1	0.086957	0.176329	0.516908	0.92029	0.997585	0.007246	0.26087	0.463768	0.71256	0.951691	0.572464	0.387409	0.014493	0.236715	0.454106	0.664251	0.995169	0.299517
0.344828	0.387931	0.267241	0.252174	0.208696	0.2	0.025862	0.301724	0.474138	0.784483	1	0.017241	0.189655	0.448276	0.715517	0.956897	0.008621	0.232759	0.525862	0.706897	0.991379	0.310345	0.232759	0.456897	0.069565	0.086957	0.017391	0.008621	0.215517	0.577586	0.715517	1	0.362069	0.508621	0.568966	0.706897	0.982759	0.051724	0.155172	0.301724	0.741379	0.905172	0.405172	0.504348	0.043103	0.267241	0.517241	0.715517	0.991379	0.413793
0.404103	0.323818	0.272079	0.267857	0.191071	0.163393	0.001784	0.231044	0.444246	0.706512	0.996432	0.006244	0.254237	0.459411	0.736842	1	0.000892	0.347904	0.589652	0.79661	0.997324	0.580731	0.165031	0.254237	0.071429	0.057143	0.003571	0.000892	0.224799	0.383586	0.706512	1	0.024978	0.199822	0.494202	0.751115	0.99554	0.008921	0.473684	0.666369	0.794826	0.990187	0.409456	0.317857	0.002676	0.417484	0.611062	0.790366	0.997324	0.341659
0.309278	0.340206	0.350515	0.213793	0.234483	0.237931	0.027491	0.24055	0.491409	0.718213	0.982818	0.006873	0.230241	0.450172	0.762887	1	0.003436	0.278351	0.512027	0.742268	0.996564	0.460481	0.257732	0.281787	0.089655	0.048276	0	0.003436	0.24055	0.436426	0.67354	1	0.116838	0.213058	0.474227	0.697595	0.828179	0.013746	0.360825	0.542955	0.890034	0.962199	0.536082	0.351724	0.017182	0.292096	0.505155	0.725086	0.996564	0.395189
0.401763	0.241814	0.356423	0.181589	0.346784	0.184111	0.006297	0.253149	0.491184	0.739295	1	0.005038	0.251889	0.532746	0.74937	0.987406	0.001259	0.234257	0.479849	0.745592	0.998741	0.481108	0.234257	0.284635	0.094578	0.054224	0.001261	0.001259	0.209068	0.447103	0.738035	1	0.040302	0.211587	0.420655	0.798489	0.997481	0.006297	0.358942	0.575567	0.707809	0.992443	0.571788	0.401009	0.003778	0.245592	0.474811	0.739295	0.998741	0.260705
0.370913	0.35513	0.273957	0.269752	0.194131	0.19526	0.007892	0.258174	0.531003	0.789177	1	0.002255	0.23788	0.505073	0.763247	0.997745	0.001127	0.228861	0.445321	0.645998	0.996618	0.514092	0.072153	0.413754	0.03386	0.072235	0.004515	0.001127	0.224352	0.468997	0.748591	1	0.170237	0.228861	0.373168	0.738444	0.971815	0.036077	0.293123	0.529876	0.759865	0.935738	0.414882	0.406321	0.013529	0.286359	0.441939	0.655017	0.996618	0.374295
0.376344	0.268817	0.354839	0.228261	0.282609	0.206522	0.021505	0.236559	0.526882	0.741935	1	0.043011	0.215054	0.397849	0.602151	0.924731	0.010753	0.225806	0.494624	0.784946	0.978495	0.333333	0.290323	0.376344	0.108696	0.065217	0.021739	0.010753	0.354839	0.494624	0.698925	1	0.043011	0.096774	0.397849	0.634409	0.956989	0.150538	0.225806	0.322581	0.795699	0.924731	0.505376	0.434783	0.043011	0.215054	0.505376	0.741935	0.956989	0.290323
0.31185	0.361746	0.326403	0.227083	0.220833	0.260417	0.014553	0.241164	0.54262	0.762994	1	0.004158	0.24948	0.480249	0.765073	0.997921	0.002079	0.251559	0.461538	0.700624	0.989605	0.392931	0.2079	0.399168	0.079167	0.083333	0	0.002079	0.328482	0.586279	0.804574	1	0.006237	0.147609	0.31185	0.569647	0.945946	0.035343	0.24948	0.532225	0.748441	0.966736	0.569647	0.420833	0.006237	0.253638	0.449064	0.654886	0.989605	0.388773
0.367089	0.388186	0.244726	0.317797	0.211864	0.190678	0.008439	0.257384	0.531646	0.797468	1	0.016878	0.303797	0.535865	0.78903	0.974684	0.004219	0.130802	0.337553	0.582278	0.991561	0.71308	0.177215	0.109705	0.076271	0.016949	0.008475	0.004219	0.438819	0.624473	0.801688	1	0.029536	0.126582	0.270042	0.35443	0.945148	0.012658	0.063291	0.092827	0.172996	0.202532	0.168776	0.186441	0.012658	0.084388	0.202532	0.341772	0.7173	0.392405
0.345992	0.362869	0.291139	0.279661	0.15678	0.237288	0.008439	0.227848	0.472574	0.772152	1	0.012658	0.21097	0.438819	0.666667	0.966245	0.004219	0.333333	0.582278	0.776371	0.987342	0.64135	0.236287	0.122363	0.088983	0.04661	0.004237	0.004219	0.206751	0.459916	0.71308	1	0.016878	0.57384	0.64557	0.886076	0.991561	0.135021	0.160338	0.261603	0.443038	0.974684	0.451477	0.389831	0.016878	0.388186	0.582278	0.767932	0.987342	0.42616
0.331915	0.310638	0.357447	0.213675	0.247863	0.230769	0.017021	0.251064	0.553191	0.791489	0.995745	0.008511	0.178723	0.429787	0.66383	0.931915	0.004255	0.297872	0.489362	0.73617	1	0.451064	0.323404	0.225532	0.106838	0.07265	0.004274	0.004255	0.208511	0.442553	0.634043	1	0.046809	0.187234	0.32766	0.570213	0.812766	0.025532	0.685106	0.851064	0.906383	0.974468	0.53617	0.34188	0.046809	0.27234	0.510638	0.731915	0.961702	0.33617
0.452991	0.17094	0.376068	0.163793	0.284483	0.137931	0.025641	0.239316	0.512821	0.760684	0.991453	0.017094	0.222222	0.401709	0.675214	1	0.008547	0.273504	0.538462	0.74359	0.982906	0.376068	0.188034	0.435897	0.068966	0.103448	0	0.008547	0.094017	0.376068	0.675214	1	0.213675	0.273504	0.324786	0.700855	0.752137	0.111111	0.444444	0.57265	0.82906	0.957265	0.470085	0.37931	0.042735	0.307692	0.521368	0.726496	0.982906	0.188034
0.355694	0.297972	0.346334	0.173437	0.239063	0.23125	0.0078	0.24337	0.471139	0.769111	0.99532	0.00468	0.25117	0.519501	0.703588	1	0.00156	0.24805	0.50858	0.764431	0.99844	0.308892	0.102964	0.588144	0.0375	0.084375	0.003125	0.00156	0.266771	0.541342	0.795632	1	0.082683	0.232449	0.687988	0.865835	0.926677	0.00624	0.25273	0.444618	0.664587	0.9922	0.51014	0.415625	0.00312	0.25741	0.514821	0.74103	0.99064	0.318253
0.3	0.413333	0.286667	0.22964	0.192256	0.221629	0.005333	0.250667	0.510667	0.78	0.998667	0.006667	0.228	0.530667	0.721333	0.997333	0.001333	0.265333	0.445333	0.753333	1	0.632	0.184	0.184	0.093458	0.058745	0.00534	0.001333	0.221333	0.528	0.730667	1	0.004	0.297333	0.446667	0.797333	0.985333	0.033333	0.286667	0.458667	0.816	0.981333	0.550667	0.368491	0.012	0.313333	0.550667	0.748	0.996	0.442667
0.38439	0.30439	0.31122	0.21582	0.234375	0.188477	0.002927	0.257561	0.523902	0.727805	1	0.001951	0.249756	0.479024	0.738537	0.997073	0.000976	0.232195	0.480976	0.778537	0.996098	0.396098	0.137561	0.466341	0.049805	0.088867	0.004883	0.000976	0.242927	0.44	0.737561	1	0.022439	0.428293	0.767805	0.916098	0.980488	0.007805	0.177561	0.499512	0.674146	0.994146	0.498537	0.398438	0.003902	0.272195	0.48	0.737561	0.995122	0.327805
0.423077	0.358974	0.217949	0.303226	0.154839	0.122581	0.012821	0.282051	0.589744	0.839744	1	0.019231	0.307692	0.608974	0.75641	0.99359	0.00641	0.134615	0.326923	0.474359	0.653846	0.512821	0.185897	0.301282	0.064516	0.090323	0.012903	0.00641	0.346154	0.717949	0.871795	1	0.025641	0.064103	0.307692	0.391026	0.583333	0.096154	0.160256	0.461538	0.557692	0.794872	0.339744	0.309677	0.025641	0.160256	0.365385	0.5	0.910256	0.397436
0.395876	0.347423	0.256701	0.251806	0.201238	0.169247	0.006186	0.253608	0.543299	0.760825	1	0.002062	0.337113	0.527835	0.769072	0.997938	0.001031	0.160825	0.375258	0.690722	0.996907	0.687629	0.073196	0.239175	0.037152	0.068111	0.004128	0.001031	0.34433	0.556701	0.754639	1	0.027835	0.174227	0.290722	0.724742	0.981443	0.005155	0.084536	0.247423	0.735052	0.997938	0.374227	0.352941	0.003093	0.157732	0.378351	0.672165	0.996907	0.375258
0.304054	0.459459	0.236486	0.340136	0.142857	0.204082	0.013514	0.202703	0.445946	0.682432	1	0.02027	0.27027	0.581081	0.831081	0.993243	0.006757	0.243243	0.459459	0.614865	0.932432	0.533784	0.121622	0.344595	0.034014	0.061224	0.006803	0.006757	0.202703	0.628378	0.864865	1	0.243243	0.263514	0.344595	0.371622	0.621622	0.087838	0.378378	0.47973	0.689189	0.777027	0.405405	0.312925	0.047297	0.324324	0.459459	0.614865	0.898649	0.493243
0.439535	0.32093	0.239535	0.261072	0.188811	0.181818	0.009302	0.25814	0.462791	0.748837	1	0.004651	0.181395	0.495349	0.723256	0.983721	0.002326	0.313953	0.54186	0.751163	0.953488	0.595349	0.15814	0.246512	0.072261	0.095571	0.002331	0.002326	0.197674	0.446512	0.755814	1	0.07907	0.506977	0.632558	0.772093	0.951163	0.016279	0.267442	0.372093	0.704651	0.990698	0.323256	0.344988	0.05814	0.27907	0.532558	0.723256	0.97907	0.330233
0.299383	0.373457	0.32716	0.198142	0.198142	0.250774	0.006173	0.225309	0.518519	0.777778	0.990741	0.009259	0.259259	0.478395	0.712963	1	0.003086	0.231481	0.503086	0.75	0.993827	0.567901	0.197531	0.234568	0.086687	0.06192	0.012384	0.003086	0.287037	0.490741	0.759259	1	0.070988	0.268519	0.432099	0.567901	0.944444	0.021605	0.185185	0.62037	0.737654	0.885802	0.617284	0.315789	0.012346	0.253086	0.512346	0.731481	0.993827	0.376543
0.388235	0.329412	0.282353	0.25	0.214286	0.178571	0.070588	0.223529	0.517647	0.658824	1	0.058824	0.341176	0.623529	0.835294	0.988235	0.011765	0.152941	0.352941	0.6	0.894118	0.317647	0.305882	0.376471	0.119048	0.047619	0	0.011765	0.188235	0.435294	0.917647	1	0.023529	0.082353	0.235294	0.341176	0.494118	0.517647	0.6	0.694118	0.811765	0.905882	0.388235	0.47619	0.023529	0.211765	0.4	0.564706	0.929412	0.4
0.402062	0.329897	0.268041	0.3125	0.208333	0.229167	0.020619	0.309278	0.618557	0.814433	0.989691	0.041237	0.247423	0.474227	0.701031	0.958763	0.010309	0.14433	0.391753	0.56701	1	0.56701	0.268041	0.164948	0.104167	0.083333	0	0.010309	0.216495	0.494845	0.845361	1	0.103093	0.154639	0.268041	0.381443	0.556701	0.597938	0.628866	0.670103	0.742268	0.969072	0.350515	0.333333	0.051546	0.185567	0.402062	0.494845	0.969072	0.350515
0.336735	0.362245	0.30102	0.235294	0.209719	0.191816	0.007653	0.257653	0.512755	0.793367	0.994898	0.005102	0.209184	0.52551	0.795918	1	0.002551	0.237245	0.443878	0.658163	0.905612	0.357143	0.058673	0.584184	0.033248	0.099744	0.012788	0.002551	0.247449	0.558673	0.875	1	0.040816	0.076531	0.091837	0.420918	0.818878	0.010204	0.306122	0.497449	0.670918	0.954082	0.533163	0.409207	0.010204	0.288265	0.520408	0.704082	0.959184	0.418367
0.315789	0.368421	0.315789	0.166667	0.204545	0.212121	0.015038	0.225564	0.503759	0.789474	1	0.022556	0.285714	0.473684	0.729323	0.992481	0.007519	0.210526	0.511278	0.699248	0.984962	0.368421	0.240602	0.390977	0.068182	0.083333	0.007576	0.007519	0.270677	0.451128	0.87218	1	0.052632	0.293233	0.390977	0.488722	0.714286	0.142857	0.233083	0.601504	0.789474	0.962406	0.413534	0.393939	0.030075	0.18797	0.413534	0.616541	0.857143	0.360902
0.358156	0.539007	0.102837	0.469751	0.085409	0.096085	0.01773	0.248227	0.446809	0.716312	0.989362	0.007092	0.35461	0.585106	0.765957	1	0.003546	0.06383	0.159574	0.301418	0.992908	0.826241	0.088652	0.085106	0.02847	0.021352	0	0.003546	0.365248	0.570922	0.776596	1	0.049645	0.141844	0.163121	0.216312	0.315603	0.095745	0.113475	0.234043	0.255319	0.921986	0.312057	0.320285	0.010638	0.141844	0.29078	0.514184	0.932624	0.5
0.249012	0.442688	0.3083	0.206349	0.162698	0.261905	0.031621	0.256917	0.529644	0.758893	1	0.007905	0.213439	0.478261	0.774704	0.996047	0.003953	0.26087	0.474308	0.695652	0.988142	0.418972	0.189723	0.391304	0.055556	0.087302	0	0.003953	0.217391	0.537549	0.853755	1	0.142292	0.316206	0.395257	0.608696	0.70751	0.027668	0.205534	0.490119	0.790514	0.913043	0.525692	0.373016	0.043478	0.237154	0.442688	0.624506	0.988142	0.422925
0.48125	0.275	0.24375	0.27044	0.238994	0.119497	0.01875	0.2375	0.51875	0.75625	1	0.0125	0.29375	0.54375	0.8	0.9875	0.00625	0.1625	0.4375	0.5625	0.95625	0.31875	0.175	0.50625	0.050314	0.075472	0.012579	0.00625	0.24375	0.4125	0.64375	1	0.025	0.0625	0.29375	0.375	0.575	0.1	0.4375	0.675	0.8	0.95625	0.4125	0.415094	0.025	0.1875	0.3875	0.55625	0.975	0.2375
0.262948	0.430279	0.306773	0.205589	0.165669	0.269461	0.00996	0.260956	0.569721	0.762948	0.992032	0.003984	0.233068	0.448207	0.760956	0.998008	0.001992	0.272908	0.523904	0.723108	1	0.464143	0.053785	0.482072	0.031936	0.087824	0	0.001992	0.223108	0.50996	0.826693	1	0.005976	0.103586	0.207171	0.958167	0.978088	0.031873	0.330677	0.498008	0.667331	0.918327	0.507968	0.359281	0.005976	0.298805	0.494024	0.669323	0.99004	0.444223
0.359081	0.335073	0.305846	0.238245	0.212121	0.211076	0.003132	0.228601	0.461378	0.713987	1	0.004175	0.245303	0.505219	0.755741	0.998956	0.001044	0.276618	0.524008	0.77453	0.997912	0.460334	0.228601	0.311065	0.08255	0.059561	0.007315	0.001044	0.267223	0.461378	0.740084	1	0.006263	0.308977	0.512526	0.7881	0.968685	0.009395	0.192067	0.605428	0.755741	0.878914	0.530271	0.342738	0.007307	0.262004	0.524008	0.742171	0.982255	0.348643
0.328063	0.355731	0.316206	0.238095	0.202381	0.230159	0.01581	0.252964	0.466403	0.750988	1	0.011858	0.245059	0.549407	0.794466	0.988142	0.003953	0.217391	0.462451	0.699605	0.992095	0.312253	0.083004	0.604743	0.035714	0.115079	0.003968	0.003953	0.150198	0.462451	0.782609	1	0.201581	0.806324	0.857708	0.87747	0.909091	0.011858	0.27668	0.454545	0.648221	0.992095	0.529644	0.365079	0.007905	0.256917	0.438735	0.656126	0.992095	0.383399
0.38843	0.278237	0.333333	0.205517	0.314483	0.197241	0.008264	0.275482	0.548209	0.760331	1	0.004132	0.206612	0.431129	0.703857	0.99449	0.001377	0.249311	0.506887	0.758953	0.995868	0.465565	0.232782	0.301653	0.096552	0.057931	0.002759	0.001377	0.212121	0.440771	0.712121	1	0.0427	0.18595	0.42562	0.819559	0.975207	0.006887	0.348485	0.57438	0.736915	0.995868	0.578512	0.383448	0.004132	0.253444	0.49449	0.753444	0.995868	0.294766
0.322531	0.449074	0.228395	0.285935	0.145286	0.196291	0.009259	0.228395	0.54321	0.811728	1	0.003086	0.311728	0.515432	0.780864	0.993827	0.001543	0.154321	0.429012	0.595679	0.984568	0.682099	0.057099	0.260802	0.02473	0.040185	0.009274	0.001543	0.307099	0.510802	0.819444	1	0.054012	0.08179	0.385802	0.470679	0.966049	0.021605	0.228395	0.530864	0.621914	0.720679	0.507716	0.31221	0.010802	0.216049	0.476852	0.635802	0.967593	0.453704
0.479532	0.251462	0.269006	0.264706	0.282353	0.158824	0.017544	0.216374	0.497076	0.748538	1	0.011696	0.204678	0.444444	0.80117	0.964912	0.005848	0.274854	0.48538	0.707602	0.976608	0.561404	0.105263	0.333333	0.052941	0.1	0.005882	0.005848	0.222222	0.561404	0.836257	1	0.064327	0.263158	0.292398	0.678363	0.97076	0.076023	0.339181	0.473684	0.701754	0.789474	0.415205	0.4	0.035088	0.28655	0.502924	0.730994	0.97076	0.263158
0.40724	0.276018	0.316742	0.245455	0.240909	0.154545	0.00905	0.280543	0.579186	0.773756	1	0.054299	0.20362	0.502262	0.760181	0.995475	0.004525	0.226244	0.420814	0.633484	0.9819	0.316742	0.095023	0.588235	0.040909	0.086364	0.004545	0.004525	0.153846	0.447964	0.755656	1	0.117647	0.773756	0.828054	0.850679	0.886878	0.0181	0.235294	0.470588	0.633484	0.986425	0.502262	0.363636	0.0181	0.21267	0.434389	0.628959	0.9819	0.244344
0.415842	0.277228	0.306931	0.24	0.23	0.2	0.029703	0.267327	0.544554	0.821782	1	0.059406	0.257426	0.485149	0.623762	0.960396	0.009901	0.118812	0.39604	0.693069	0.90099	0.485149	0.158416	0.356436	0.06	0.1	0	0.009901	0.19802	0.346535	0.633663	1	0.069307	0.09901	0.138614	0.673267	0.712871	0.267327	0.405941	0.762376	0.851485	0.970297	0.386139	0.36	0.059406	0.138614	0.455446	0.673267	0.90099	0.247525
0.401639	0.229508	0.368852	0.165289	0.272727	0.247934	0.02459	0.229508	0.491803	0.737705	1	0.040984	0.270492	0.47541	0.754098	0.991803	0.008197	0.254098	0.459016	0.704918	0.983607	0.418033	0.286885	0.295082	0.140496	0.057851	0.008264	0.008197	0.286885	0.680328	0.819672	1	0.016393	0.204918	0.319672	0.696721	0.95082	0.090164	0.155738	0.532787	0.606557	0.909836	0.442623	0.46281	0.016393	0.262295	0.442623	0.680328	0.983607	0.237705
0.334928	0.294258	0.370813	0.194245	0.280576	0.218225	0.004785	0.289474	0.509569	0.748804	0.997608	0.011962	0.200957	0.507177	0.729665	0.995215	0.002392	0.251196	0.4689	0.772727	1	0.361244	0.138756	0.5	0.076739	0.100719	0.004796	0.002392	0.212919	0.54067	0.799043	1	0.047847	0.174641	0.533493	0.92823	0.995215	0.009569	0.258373	0.476077	0.712919	0.942584	0.586124	0.364508	0.009569	0.244019	0.471292	0.674641	0.995215	0.322967
0.412346	0.353086	0.234568	0.277228	0.173267	0.163366	0.012346	0.283951	0.451852	0.725926	0.997531	0.004938	0.209877	0.503704	0.676543	0.992593	0.002469	0.22963	0.612346	0.849383	1	0.632099	0.120988	0.246914	0.049505	0.064356	0	0.002469	0.197531	0.454321	0.634568	1	0.130864	0.651852	0.765432	0.881481	0.965432	0.069136	0.293827	0.592593	0.819753	0.995062	0.360494	0.321782	0.007407	0.219753	0.562963	0.77284	0.990123	0.404938
0.385841	0.320354	0.293805	0.241135	0.218085	0.205674	0.00531	0.221239	0.492035	0.785841	1	0.00354	0.256637	0.469027	0.727434	0.99646	0.00177	0.260177	0.515044	0.697345	0.99292	0.474336	0.118584	0.40708	0.058511	0.10461	0.005319	0.00177	0.315044	0.59115	0.842478	1	0.047788	0.189381	0.580531	0.697345	0.909735	0.00531	0.210619	0.39646	0.60531	0.980531	0.557522	0.35461	0.019469	0.256637	0.460177	0.637168	0.99292	0.341593
0.37265	0.321368	0.305983	0.22774	0.239726	0.190068	0.003419	0.232479	0.482051	0.777778	1	0.008547	0.271795	0.528205	0.757265	0.998291	0.001709	0.22906	0.480342	0.702564	0.989744	0.494017	0.176068	0.329915	0.063356	0.070205	0.005137	0.001709	0.213675	0.475214	0.764103	1	0.042735	0.25812	0.452991	0.564103	0.704274	0.05812	0.283761	0.622222	0.837607	0.996581	0.466667	0.363014	0.006838	0.247863	0.488889	0.697436	0.996581	0.353846
0.342105	0.37218	0.285714	0.25283	0.2	0.188679	0.007519	0.240602	0.507519	0.781955	0.988722	0.011278	0.225564	0.496241	0.759398	1	0.003759	0.278195	0.469925	0.661654	0.966165	0.413534	0.078947	0.507519	0.030189	0.090566	0	0.003759	0.109023	0.451128	0.75188	1	0.473684	0.774436	0.819549	0.838346	0.868421	0.052632	0.296992	0.458647	0.642857	0.954887	0.466165	0.34717	0.030075	0.278195	0.466165	0.650376	0.947368	0.424812
0.398827	0.313783	0.28739	0.255882	0.235294	0.197059	0.017595	0.272727	0.504399	0.83871	1	0.005865	0.28739	0.560117	0.747801	0.970674	0.002933	0.178886	0.428152	0.648094	0.941349	0.390029	0.202346	0.407625	0.064706	0.052941	0.011765	0.002933	0.222874	0.636364	0.900293	1	0.02346	0.105572	0.240469	0.656891	0.806452	0.143695	0.331378	0.44868	0.71261	0.868035	0.439883	0.452941	0.008798	0.211144	0.472141	0.674487	0.970674	0.343109
0.306159	0.519928	0.173913	0.255898	0.098004	0.179673	0.005435	0.213768	0.568841	0.894928	1	0.003623	0.32971	0.512681	0.679348	0.998188	0.001812	0.188406	0.356884	0.67029	0.869565	0.748188	0.067029	0.184783	0.029038	0.043557	0	0.001812	0.311594	0.498188	0.684783	1	0.012681	0.134058	0.197464	0.230072	0.873188	0.028986	0.257246	0.802536	0.858696	0.994565	0.375	0.290381	0.007246	0.175725	0.396739	0.686594	0.994565	0.54529
0.408805	0.27044	0.320755	0.227848	0.227848	0.189873	0.018868	0.201258	0.427673	0.72327	0.987421	0.012579	0.339623	0.534591	0.773585	0.981132	0.006289	0.194969	0.45283	0.660377	1	0.339623	0.08805	0.572327	0.037975	0.088608	0	0.006289	0.081761	0.427673	0.710692	1	0.45283	0.465409	0.490566	0.528302	0.566038	0.132075	0.283019	0.603774	0.792453	0.981132	0.459119	0.443038	0.044025	0.264151	0.534591	0.742138	0.981132	0.264151
0.37395	0.380952	0.245098	0.304348	0.165498	0.178121	0.007003	0.271709	0.528011	0.80112	1	0.002801	0.256303	0.522409	0.780112	0.997199	0.001401	0.208683	0.418768	0.64986	0.957983	0.509804	0.121849	0.368347	0.040673	0.057504	0.007013	0.001401	0.292717	0.670868	0.872549	1	0.060224	0.264706	0.414566	0.539216	0.642857	0.004202	0.190476	0.406162	0.64986	0.757703	0.487395	0.350631	0.004202	0.229692	0.441176	0.654062	0.990196	0.389356
0.360563	0.416901	0.222535	0.330042	0.124118	0.188999	0.004225	0.21831	0.453521	0.721127	0.995775	0.008451	0.226761	0.477465	0.752113	0.997183	0.001408	0.360563	0.602817	0.791549	1	0.587324	0.112676	0.3	0.039492	0.059238	0.005642	0.001408	0.164789	0.311268	0.612676	1	0.040845	0.592958	0.709859	0.895775	0.967606	0.004225	0.43662	0.633803	0.778873	0.997183	0.497183	0.358251	0.007042	0.31831	0.547887	0.75493	0.994366	0.457746
0.335938	0.390625	0.273438	0.267717	0.15748	0.244094	0.023438	0.210938	0.398438	0.71875	0.992188	0.015625	0.21875	0.539062	0.773438	1	0.007812	0.28125	0.554688	0.734375	0.960938	0.242188	0.046875	0.710938	0.015748	0.07874	0	0.007812	0.054688	0.5625	0.703125	1	0.945312	0.945312	0.960938	0.96875	0.984375	0.0625	0.28125	0.460938	0.71875	0.914062	0.445312	0.456693	0.03125	0.328125	0.523438	0.742188	0.96875	0.375
0.353952	0.358534	0.287514	0.248853	0.209862	0.207569	0.002291	0.271478	0.500573	0.735395	0.998855	0.005727	0.213058	0.429553	0.722795	0.996564	0.001145	0.280641	0.533792	0.778923	1	0.568156	0.106529	0.325315	0.040138	0.108945	0.008028	0.001145	0.186712	0.457045	0.739977	1	0.17984	0.616266	0.73425	0.799542	0.981672	0.005727	0.30126	0.467354	0.680412	0.973654	0.568156	0.383028	0.004582	0.183276	0.453608	0.737686	0.981672	0.363116
0.325949	0.363924	0.310127	0.228571	0.196825	0.209524	0.009494	0.281646	0.503165	0.78481	0.996835	0.006329	0.205696	0.414557	0.661392	0.984177	0.003165	0.25	0.528481	0.794304	1	0.424051	0.218354	0.357595	0.069841	0.069841	0	0.003165	0.208861	0.420886	0.632911	1	0.028481	0.170886	0.433544	0.75	0.936709	0.072785	0.389241	0.579114	0.822785	0.974684	0.553797	0.349206	0.025316	0.212025	0.458861	0.718354	0.987342	0.408228
0.310954	0.374558	0.314488	0.237589	0.202128	0.237589	0.010601	0.24735	0.477032	0.713781	0.985866	0.053004	0.257951	0.45583	0.717314	0.989399	0.003534	0.219081	0.565371	0.805654	1	0.540636	0.130742	0.328622	0.074468	0.088652	0.003546	0.003534	0.268551	0.424028	0.685512	1	0.09894	0.144876	0.597173	0.798587	0.957597	0.007067	0.219081	0.547703	0.749117	0.992933	0.501767	0.404255	0.007067	0.325088	0.501767	0.763251	0.996466	0.363958
0.314721	0.527919	0.15736	0.346939	0.107143	0.112245	0.030457	0.238579	0.532995	0.71066	1	0.010152	0.284264	0.563452	0.80203	0.994924	0.005076	0.15736	0.28934	0.482234	0.857868	0.375635	0.248731	0.375635	0.035714	0.066327	0.015306	0.005076	0.253807	0.746193	0.888325	1	0.06599	0.411168	0.472081	0.543147	0.86802	0.055838	0.218274	0.340102	0.695431	0.969543	0.335025	0.326531	0.06599	0.19797	0.340102	0.497462	0.923858	0.548223
0.257143	0.508163	0.234694	0.243354	0.149284	0.204499	0.012245	0.308163	0.563265	0.791837	0.993878	0.006122	0.222449	0.495918	0.718367	1	0.002041	0.238776	0.428571	0.773469	0.989796	0.687755	0.055102	0.257143	0.03681	0.04908	0.00409	0.002041	0.216327	0.504082	0.710204	1	0.059184	0.108163	0.226531	0.240816	0.708163	0.077551	0.365306	0.565306	0.908163	0.981633	0.469388	0.368098	0.008163	0.222449	0.495918	0.67551	0.989796	0.508163
0.290844	0.414722	0.294434	0.23741	0.176259	0.26259	0.003591	0.240575	0.48474	0.788151	0.994614	0.005386	0.253142	0.517056	0.694794	0.998205	0.001795	0.244165	0.472172	0.745063	1	0.603232	0.213645	0.183124	0.071942	0.05036	0	0.001795	0.263914	0.517056	0.732496	1	0.014363	0.231598	0.454219	0.773788	0.994614	0.030521	0.199282	0.43088	0.745063	0.964093	0.536804	0.330935	0.005386	0.233393	0.493716	0.692998	0.992819	0.420108
0.319635	0.424658	0.255708	0.302752	0.169725	0.192661	0.013699	0.260274	0.515982	0.789954	1	0.009132	0.200913	0.520548	0.73516	0.995434	0.004566	0.296804	0.479452	0.666667	0.894977	0.406393	0.420091	0.173516	0.119266	0.055046	0	0.004566	0.273973	0.611872	0.789954	1	0.027397	0.30137	0.47032	0.598174	0.821918	0.086758	0.123288	0.26484	0.872146	0.986301	0.406393	0.412844	0.031963	0.251142	0.43379	0.648402	0.858447	0.43379
0.393443	0.360656	0.245902	0.366667	0.166667	0.15	0.04918	0.213115	0.459016	0.737705	0.967213	0.032787	0.163934	0.327869	0.606557	1	0.016393	0.42623	0.672131	0.770492	0.934426	0.639344	0.016393	0.344262	0.033333	0.1	0	0.016393	0.147541	0.360656	0.540984	1	0.442623	0.442623	0.442623	0.442623	0.442623	0.278689	0.590164	0.704918	0.786885	0.885246	0.311475	0.366667	0.344262	0.47541	0.655738	0.770492	0.934426	0.442623
0.326733	0.346535	0.326733	0.23	0.24	0.19	0.039604	0.316832	0.50495	0.782178	1	0.019802	0.237624	0.485149	0.742574	0.970297	0.009901	0.188119	0.465347	0.70297	0.940594	0.485149	0.386139	0.128713	0.09	0.07	0.01	0.009901	0.247525	0.544554	0.871287	1	0.178218	0.29703	0.445545	0.594059	0.732673	0.069307	0.089109	0.118812	0.663366	0.831683	0.455446	0.38	0.049505	0.217822	0.435644	0.663366	0.960396	0.356436
0.459184	0.306122	0.234694	0.276923	0.220513	0.123077	0.015306	0.30102	0.566327	0.729592	1	0.010204	0.285714	0.678571	0.811224	0.979592	0.005102	0.158163	0.311224	0.489796	0.984694	0.576531	0.265306	0.158163	0.066667	0.025641	0.005128	0.005102	0.30102	0.69898	0.852041	1	0.096939	0.178571	0.270408	0.428571	0.785714	0.061224	0.464286	0.581633	0.622449	0.663265	0.321429	0.25641	0.020408	0.168367	0.260204	0.469388	0.984694	0.326531
0.476891	0.348739	0.17437	0.267368	0.168421	0.107368	0.004202	0.336134	0.537815	0.754202	1	0.006303	0.193277	0.44958	0.779412	0.997899	0.002101	0.210084	0.359244	0.594538	0.966387	0.563025	0.077731	0.359244	0.031579	0.098947	0.002105	0.002101	0.212185	0.579832	0.785714	1	0.142857	0.205882	0.243697	0.313025	0.968487	0.023109	0.378151	0.497899	0.75	0.995798	0.247899	0.231579	0.016807	0.182773	0.283613	0.441176	0.970588	0.371849
0.362934	0.378378	0.258687	0.290698	0.197674	0.158915	0.007722	0.23166	0.517375	0.76834	0.980695	0.011583	0.181467	0.382239	0.710425	0.996139	0.003861	0.355212	0.606178	0.752896	1	0.571429	0.196911	0.23166	0.046512	0.069767	0.015504	0.003861	0.146718	0.305019	0.633205	1	0.316602	0.401544	0.532819	0.756757	0.996139	0.023166	0.459459	0.671815	0.837838	0.942085	0.42471	0.317829	0.019305	0.3861	0.563707	0.737452	0.992278	0.409266
0.318428	0.375339	0.306233	0.225237	0.204885	0.257802	0.00271	0.239837	0.468835	0.742547	1	0.00813	0.234417	0.498645	0.757453	0.99458	0.001355	0.283198	0.525745	0.739837	0.99729	0.485095	0.109756	0.405149	0.061058	0.080054	0.001357	0.001355	0.288618	0.574526	0.795393	1	0.135501	0.227642	0.542005	0.753388	0.95664	0.023035	0.241192	0.394309	0.659892	0.993225	0.487805	0.474898	0.004065	0.260163	0.52439	0.772358	0.99729	0.415989
0.353873	0.322183	0.323944	0.197531	0.238095	0.21164	0.007042	0.255282	0.554577	0.792254	1	0.003521	0.214789	0.514085	0.741197	0.992958	0.001761	0.257042	0.457746	0.68662	0.998239	0.477113	0.121479	0.401408	0.049383	0.067019	0.003527	0.001761	0.262324	0.522887	0.788732	1	0.146127	0.265845	0.642606	0.822183	0.996479	0.035211	0.209507	0.420775	0.65493	0.954225	0.558099	0.359788	0.012324	0.272887	0.463028	0.681338	0.998239	0.352113
0.385965	0.280702	0.333333	0.19469	0.238938	0.19469	0.04386	0.210526	0.491228	0.701754	1	0.026316	0.368421	0.614035	0.789474	0.991228	0.008772	0.175439	0.429825	0.710526	0.973684	0.385965	0.166667	0.447368	0.044248	0.097345	0.00885	0.008772	0.192982	0.350877	0.692982	1	0.263158	0.289474	0.394737	0.438596	0.745614	0.061404	0.447368	0.578947	0.859649	0.973684	0.429825	0.371681	0.035088	0.315789	0.535088	0.719298	0.973684	0.307018
0.388889	0.247475	0.363636	0.17952	0.307206	0.207332	0.006313	0.260101	0.536616	0.775253	1	0.005051	0.244949	0.460859	0.72601	0.994949	0.001263	0.234848	0.488636	0.741162	0.997475	0.477273	0.224747	0.29798	0.092288	0.059418	0.001264	0.001263	0.213384	0.450758	0.742424	1	0.041667	0.179293	0.429293	0.791667	0.997475	0.006313	0.329545	0.573232	0.75	0.991162	0.573232	0.389381	0.003788	0.268939	0.479798	0.734848	0.997475	0.277778
0.357576	0.367677	0.274747	0.275304	0.204453	0.182186	0.008081	0.274747	0.476768	0.713131	1	0.006061	0.286869	0.606061	0.842424	0.99798	0.00202	0.2	0.379798	0.640404	0.991919	0.458586	0.070707	0.470707	0.026316	0.082996	0.006073	0.00202	0.40202	0.59596	0.860606	1	0.020202	0.064646	0.20202	0.767677	0.99596	0.006061	0.218182	0.381818	0.632323	0.951515	0.444444	0.384615	0.006061	0.177778	0.385859	0.640404	0.99596	0.381818
0.435374	0.369615	0.195011	0.322727	0.152273	0.163636	0.015873	0.285714	0.478458	0.705215	1	0.004535	0.24263	0.487528	0.739229	0.997732	0.002268	0.176871	0.53288	0.777778	0.99093	0.698413	0.097506	0.204082	0.056818	0.061364	0.006818	0.002268	0.23356	0.430839	0.693878	1	0.00907	0.21542	0.337868	0.77551	0.922902	0.040816	0.517007	0.623583	0.825397	0.988662	0.340136	0.286364	0.031746	0.181406	0.344671	0.741497	0.99093	0.39229
0.371901	0.438017	0.190083	0.274834	0.134106	0.15894	0.014876	0.249587	0.47438	0.707438	1	0.003306	0.22314	0.552066	0.801653	0.998347	0.001653	0.271074	0.442975	0.680992	0.993388	0.766942	0.049587	0.183471	0.019868	0.033113	0.003311	0.001653	0.284298	0.616529	0.808264	1	0.216529	0.300826	0.358678	0.408264	0.547107	0.008264	0.173554	0.266116	0.461157	0.606612	0.385124	0.357616	0.008264	0.264463	0.471074	0.704132	0.960331	0.446281
0.302752	0.426606	0.270642	0.225806	0.179724	0.207373	0.009174	0.169725	0.449541	0.747706	0.958716	0.018349	0.238532	0.444954	0.711009	0.995413	0.004587	0.334862	0.56422	0.793578	1	0.582569	0.256881	0.16055	0.078341	0.032258	0.004608	0.004587	0.233945	0.440367	0.738532	1	0.266055	0.472477	0.573394	0.83945	0.940367	0.12844	0.16055	0.201835	0.637615	0.889908	0.46789	0.35023	0.142202	0.330275	0.573394	0.770642	0.990826	0.444954
0.396739	0.298913	0.304348	0.262295	0.234973	0.218579	0.016304	0.222826	0.483696	0.782609	1	0.01087	0.244565	0.51087	0.793478	0.983696	0.005435	0.23913	0.478261	0.673913	0.923913	0.440217	0.375	0.184783	0.153005	0.021858	0	0.005435	0.211957	0.592391	0.853261	1	0.048913	0.190217	0.478261	0.663043	0.940217	0.326087	0.36413	0.413043	0.766304	0.815217	0.434783	0.502732	0.021739	0.347826	0.48913	0.673913	0.923913	0.293478
0.428115	0.364217	0.207668	0.298077	0.189103	0.141026	0.01278	0.300319	0.635783	0.837061	0.996805	0.00639	0.246006	0.447284	0.626198	1	0.003195	0.146965	0.345048	0.642173	0.926518	0.635783	0.118211	0.246006	0.057692	0.051282	0	0.003195	0.313099	0.511182	0.821086	1	0.054313	0.140575	0.175719	0.261981	0.830671	0.095847	0.217252	0.629393	0.690096	0.923323	0.316294	0.333333	0.015974	0.175719	0.399361	0.495208	0.926518	0.434505
0.358242	0.432967	0.208791	0.248899	0.167401	0.143172	0.006593	0.224176	0.437363	0.672527	1	0.004396	0.27033	0.586813	0.815385	0.997802	0.002198	0.276923	0.483516	0.643956	0.995604	0.657143	0.063736	0.279121	0.030837	0.044053	0.004405	0.002198	0.210989	0.586813	0.784615	1	0.068132	0.32967	0.364835	0.417582	0.643956	0.101099	0.259341	0.501099	0.718681	0.947253	0.4	0.352423	0.017582	0.274725	0.483516	0.694505	0.971429	0.452747
0.389937	0.352201	0.257862	0.291139	0.208861	0.177215	0.018868	0.238994	0.45283	0.672956	1	0.012579	0.220126	0.54717	0.786164	0.949686	0.006289	0.251572	0.465409	0.754717	0.981132	0.36478	0.301887	0.333333	0.094937	0.06962	0.018987	0.006289	0.132075	0.440252	0.528302	1	0.031447	0.427673	0.792453	0.899371	0.987421	0.125786	0.27044	0.371069	0.63522	0.880503	0.421384	0.455696	0.044025	0.301887	0.566038	0.779874	0.981132	0.320755
0.310345	0.431034	0.258621	0.306358	0.17341	0.179191	0.028736	0.229885	0.54023	0.735632	1	0.011494	0.183908	0.511494	0.747126	0.977011	0.005747	0.247126	0.454023	0.724138	0.994253	0.591954	0.172414	0.235632	0.069364	0.080925	0	0.005747	0.16092	0.436782	0.701149	1	0.218391	0.252874	0.5	0.574713	0.95977	0.137931	0.321839	0.678161	0.752874	0.91954	0.436782	0.393064	0.017241	0.298851	0.477011	0.706897	0.965517	0.413793
0.340716	0.425894	0.23339	0.242321	0.158703	0.204778	0.005111	0.192504	0.449744	0.763203	1	0.006814	0.327087	0.536627	0.703578	0.998296	0.001704	0.218058	0.454855	0.79046	0.994889	0.621806	0.11414	0.264055	0.042662	0.069966	0.005119	0.001704	0.277683	0.529813	0.715503	1	0.093697	0.235094	0.340716	0.599659	0.994889	0.010221	0.192504	0.454855	0.795571	0.993186	0.402044	0.337884	0.010221	0.27598	0.446337	0.720613	0.984668	0.415673
0.332858	0.494654	0.172488	0.271755	0.131241	0.14194	0.002851	0.27655	0.523877	0.776194	1	0.001426	0.203136	0.459016	0.72345	0.998574	0.000713	0.353528	0.592302	0.783321	0.993585	0.650748	0.045617	0.303635	0.027817	0.06776	0.000713	0.000713	0.238061	0.481112	0.709195	1	0.104063	0.37206	0.567356	0.724875	0.994298	0.013542	0.326443	0.580898	0.802566	0.986458	0.329294	0.323823	0.014968	0.295795	0.503207	0.754811	0.993585	0.491091
0.293907	0.46595	0.240143	0.240575	0.16158	0.149013	0.005376	0.277778	0.491039	0.783154	0.994624	0.008961	0.218638	0.507168	0.700717	1	0.001792	0.286738	0.464158	0.756272	0.987455	0.648746	0.200717	0.150538	0.071813	0.039497	0	0.001792	0.240143	0.505376	0.741935	1	0.005376	0.247312	0.417563	0.752688	0.987455	0.150538	0.318996	0.59319	0.731183	0.951613	0.546595	0.330341	0.003584	0.295699	0.528674	0.700717	0.991039	0.453405
0.35	0.377273	0.272727	0.242792	0.197269	0.212443	0.00303	0.233333	0.424242	0.739394	0.99697	0.006061	0.254545	0.574242	0.806061	0.995455	0.001515	0.20303	0.457576	0.674242	1	0.472727	0.127273	0.4	0.047041	0.08346	0.007587	0.001515	0.29697	0.607576	0.842424	1	0.036364	0.128788	0.345455	0.654545	0.990909	0.010606	0.263636	0.436364	0.625758	0.989394	0.509091	0.358118	0.004545	0.215152	0.475758	0.681818	0.993939	0.390909
0.420213	0.324468	0.255319	0.28877	0.144385	0.203209	0.010638	0.239362	0.478723	0.680851	1	0.026596	0.223404	0.37766	0.75	0.984043	0.005319	0.319149	0.601064	0.787234	0.994681	0.617021	0.101064	0.281915	0.064171	0.064171	0	0.005319	0.164894	0.324468	0.632979	1	0.058511	0.590426	0.617021	0.680851	0.792553	0.388298	0.457447	0.734043	0.87766	0.989362	0.303191	0.352941	0.031915	0.404255	0.617021	0.81383	0.957447	0.31383
0.300173	0.473183	0.226644	0.231169	0.137662	0.227706	0.004325	0.345156	0.58737	0.799308	0.999135	0.00173	0.207612	0.372837	0.643599	0.991349	0.000865	0.360727	0.634948	0.803633	1	0.758651	0.08045	0.1609	0.029437	0.036364	0.001732	0.000865	0.200692	0.390138	0.579585	1	0.009516	0.705882	0.801038	0.872837	0.958478	0.079585	0.687716	0.787197	0.897924	0.987889	0.675606	0.245887	0.002595	0.219723	0.393599	0.690311	0.985294	0.525087
0.450704	0.232394	0.316901	0.184397	0.297872	0.156028	0.014085	0.225352	0.43662	0.739437	0.992958	0.021127	0.302817	0.549296	0.802817	0.957746	0.007042	0.21831	0.507042	0.690141	1	0.232394	0	0.767606	0	0.12766	0	0.007042	0.260563	0.5	0.690141	1	0	0	0	0	0	0.028169	0.239437	0.464789	0.746479	0.978873	0.535211	0.368794	0.035211	0.302817	0.521127	0.71831	0.922535	0.260563
0.42542	0.383403	0.191176	0.304942	0.171399	0.117771	0.003151	0.257353	0.490546	0.727941	1	0.002101	0.189076	0.442227	0.726891	0.995798	0.00105	0.387605	0.644958	0.790966	0.992647	0.744748	0.005252	0.25	0.004206	0.052576	0	0.00105	0.203782	0.391807	0.598739	1	0.084034	0.084034	0.085084	0.504202	0.506303	0.012605	0.656513	0.752101	0.828782	0.991597	0.281513	0.271293	0.039916	0.481092	0.671218	0.82563	0.992647	0.401261
0.358416	0.346535	0.29505	0.248016	0.202381	0.19246	0.005941	0.281188	0.562376	0.772277	1	0.00396	0.160396	0.374257	0.710891	0.994059	0.00198	0.338614	0.540594	0.746535	0.99802	0.485149	0.156436	0.358416	0.053571	0.069444	0.005952	0.00198	0.120792	0.334653	0.687129	1	0.172277	0.445545	0.615842	0.79802	0.914851	0.20198	0.368317	0.544554	0.776238	0.99604	0.522772	0.353175	0.013861	0.322772	0.512871	0.752475	0.99604	0.39604
0.376623	0.285714	0.337662	0.200521	0.265625	0.195312	0.005195	0.184416	0.418182	0.724675	1	0.023377	0.335065	0.522078	0.742857	0.98961	0.002597	0.212987	0.501299	0.753247	0.997403	0.371429	0.228571	0.4	0.088542	0.072917	0	0.002597	0.288312	0.480519	0.792208	1	0.01039	0.187013	0.387013	0.607792	0.994805	0.051948	0.238961	0.581818	0.768831	0.979221	0.602597	0.411458	0.01039	0.301299	0.509091	0.742857	0.997403	0.322078
0.27027	0.525799	0.203931	0.275862	0.110837	0.192118	0.004914	0.199017	0.371007	0.55774	1	0.009828	0.358722	0.628993	0.798526	0.995086	0.002457	0.154791	0.353808	0.58231	0.987715	0.710074	0.149877	0.140049	0.059113	0.039409	0	0.002457	0.429975	0.643735	0.820639	1	0.027027	0.125307	0.206388	0.375921	0.459459	0.017199	0.149877	0.240786	0.334152	0.484029	0.513514	0.305419	0.022113	0.336609	0.565111	0.712531	0.990172	0.530713
0.36831	0.307746	0.323944	0.212121	0.230444	0.206483	0.001408	0.234507	0.45	0.734507	0.999296	0.002113	0.273944	0.529577	0.748592	0.997183	0.000704	0.247183	0.505634	0.764789	1	0.538732	0.35493	0.106338	0.11346	0.03876	0.007752	0.000704	0.249296	0.502817	0.716901	1	0.009155	0.232394	0.467606	0.740141	0.933099	0.002113	0.25	0.673239	0.95493	0.998592	0.585915	0.283298	0.002113	0.25493	0.494366	0.761972	0.997887	0.347183
0.453228	0.305665	0.241107	0.271768	0.224274	0.156992	0.013175	0.283267	0.474308	0.768116	0.998682	0.002635	0.26087	0.524374	0.783926	1	0.001318	0.188406	0.482213	0.699605	0.997365	0.513834	0.171278	0.314888	0.064644	0.077836	0.001319	0.001318	0.251647	0.549407	0.83004	1	0.006588	0.189723	0.382082	0.545455	0.747036	0.022398	0.272727	0.517787	0.732543	0.976285	0.345191	0.290237	0.00527	0.201581	0.399209	0.636364	0.997365	0.350461
0.330626	0.358245	0.311129	0.233333	0.202439	0.222764	0.007311	0.216084	0.459789	0.720552	0.993501	0.001625	0.233144	0.48091	0.758733	1	0.000812	0.295695	0.535337	0.762794	0.998375	0.429732	0.137287	0.432981	0.047967	0.086992	0.004065	0.000812	0.186028	0.461413	0.718928	1	0.030057	0.457352	0.625508	0.87896	0.952071	0.001625	0.26645	0.476848	0.757108	0.992689	0.510154	0.349593	0.003249	0.305443	0.537774	0.75792	0.998375	0.379366
0.316832	0.368317	0.314851	0.240079	0.188492	0.257937	0.005941	0.275248	0.534653	0.790099	0.99604	0.011881	0.253465	0.510891	0.730693	1	0.00198	0.19604	0.457426	0.720792	0.99802	0.524752	0.160396	0.314851	0.081349	0.077381	0.001984	0.00198	0.273267	0.566337	0.809901	1	0.071287	0.285149	0.481188	0.718812	0.972277	0.011881	0.19604	0.423762	0.669307	0.990099	0.534653	0.365079	0.007921	0.243564	0.471287	0.752475	0.990099	0.39802
0.4	0.248276	0.351724	0.180556	0.215278	0.208333	0.013793	0.234483	0.475862	0.682759	1	0.068966	0.262069	0.572414	0.806897	0.986207	0.006897	0.206897	0.496552	0.772414	0.97931	0.337931	0.337931	0.324138	0.131944	0.034722	0.006944	0.006897	0.117241	0.510345	0.737931	1	0.013793	0.255172	0.627586	0.875862	0.986207	0.172414	0.324138	0.406897	0.489655	0.710345	0.4	0.486111	0.02069	0.206897	0.544828	0.744828	0.97931	0.255172
0.315789	0.361842	0.322368	0.271523	0.205298	0.18543	0.026316	0.230263	0.493421	0.730263	0.993421	0.013158	0.263158	0.519737	0.822368	1	0.006579	0.236842	0.453947	0.684211	0.927632	0.361842	0.177632	0.460526	0.07947	0.07947	0	0.006579	0.184211	0.348684	0.875	1	0.052632	0.085526	0.164474	0.230263	0.940789	0.269737	0.453947	0.598684	0.75	0.868421	0.532895	0.437086	0.052632	0.269737	0.447368	0.690789	0.934211	0.368421
0.398496	0.263158	0.338346	0.234848	0.25	0.19697	0.015038	0.300752	0.601504	0.774436	0.992481	0.022556	0.18797	0.421053	0.684211	1	0.007519	0.218045	0.443609	0.654135	0.977444	0.398496	0.330827	0.270677	0.075758	0.060606	0	0.007519	0.180451	0.518797	0.669173	1	0.12782	0.225564	0.345865	0.466165	0.56391	0.06015	0.736842	0.804511	0.87218	0.984962	0.466165	0.318182	0.030075	0.225564	0.353383	0.548872	0.977444	0.285714
0.372624	0.334601	0.292776	0.221374	0.179389	0.229008	0.019011	0.190114	0.467681	0.768061	1	0.007605	0.231939	0.513308	0.73384	0.980989	0.003802	0.296578	0.494297	0.703422	0.977186	0.311787	0.102662	0.585551	0.030534	0.099237	0	0.003802	0.087452	0.277567	0.703422	1	0.498099	0.806084	0.847909	0.882129	0.908745	0.019011	0.30038	0.48289	0.661597	0.984791	0.467681	0.312977	0.04943	0.30038	0.479087	0.665399	0.977186	0.30038
0.447761	0.291045	0.261194	0.285714	0.24812	0.090226	0.052239	0.268657	0.537313	0.738806	1	0.014925	0.134328	0.402985	0.716418	0.992537	0.007463	0.19403	0.455224	0.746269	0.977612	0.470149	0.485075	0.044776	0.150376	0.015038	0	0.007463	0.335821	0.597015	0.80597	1	0.014925	0.164179	0.365672	0.58209	0.880597	0.947761	0.947761	0.962687	0.970149	0.985075	0.358209	0.43609	0.014925	0.19403	0.402985	0.589552	0.962687	0.291045
0.408163	0.29932	0.292517	0.232877	0.260274	0.19863	0.013605	0.258503	0.442177	0.748299	0.993197	0.088435	0.319728	0.564626	0.734694	1	0.006803	0.142857	0.469388	0.741497	0.979592	0.353741	0.312925	0.333333	0.130137	0.047945	0.006849	0.006803	0.142857	0.510204	0.748299	1	0.013605	0.244898	0.619048	0.891156	0.993197	0.170068	0.326531	0.408163	0.489796	0.829932	0.387755	0.479452	0.020408	0.204082	0.52381	0.727891	0.979592	0.306122
0.334247	0.386301	0.279452	0.255144	0.183813	0.1893	0.00274	0.228767	0.482192	0.715068	0.99589	0.00411	0.319178	0.636986	0.857534	0.99863	0.00137	0.216438	0.4	0.587671	1	0.49589	0.050685	0.453425	0.032922	0.093278	0.002743	0.00137	0.445205	0.683562	0.871233	1	0.009589	0.646575	0.676712	0.741096	0.889041	0.020548	0.191781	0.334247	0.478082	0.856164	0.491781	0.386831	0.005479	0.224658	0.471233	0.79589	0.99726	0.442466
0.456522	0.333333	0.210145	0.335766	0.138686	0.189781	0.021739	0.210145	0.442029	0.746377	1	0.014493	0.202899	0.42029	0.644928	0.992754	0.007246	0.369565	0.57971	0.797101	0.971014	0.5	0.318841	0.181159	0.080292	0.080292	0.007299	0.007246	0.253623	0.42029	0.76087	1	0.369565	0.5	0.615942	0.818841	0.956522	0.021739	0.094203	0.137681	0.246377	0.978261	0.326087	0.452555	0.108696	0.268116	0.550725	0.746377	0.971014	0.384058
0.32199	0.324607	0.353403	0.230971	0.217848	0.246719	0.005236	0.227749	0.497382	0.769634	1	0.007853	0.251309	0.47644	0.759162	0.997382	0.002618	0.23822	0.502618	0.727749	0.986911	0.463351	0.209424	0.327225	0.052493	0.068241	0.015748	0.002618	0.157068	0.45288	0.685864	1	0.044503	0.235602	0.518325	0.717277	0.879581	0.041885	0.356021	0.494764	0.850785	0.992147	0.565445	0.388451	0.013089	0.256545	0.484293	0.730366	0.986911	0.324607
0.378446	0.323308	0.298246	0.228356	0.209536	0.200753	0.003759	0.205514	0.510025	0.775689	1	0.002506	0.243108	0.491228	0.73183	0.997494	0.001253	0.266917	0.488722	0.734336	0.998747	0.570175	0.139098	0.290727	0.058971	0.091593	0.003764	0.001253	0.263158	0.551378	0.750627	1	0.098997	0.333333	0.535088	0.738095	0.907268	0.011278	0.121554	0.373434	0.759398	0.988722	0.462406	0.311167	0.015038	0.23183	0.432331	0.740602	0.989975	0.35213
0.460526	0.305921	0.233553	0.254125	0.207921	0.132013	0.016447	0.266447	0.460526	0.667763	0.993421	0.006579	0.223684	0.542763	0.776316	1	0.003289	0.203947	0.575658	0.773026	0.967105	0.361842	0.072368	0.565789	0.019802	0.079208	0.006601	0.003289	0.282895	0.5625	0.815789	1	0.565789	0.578947	0.684211	0.723684	0.8125	0.016447	0.217105	0.421053	0.667763	0.976974	0.378289	0.389439	0.023026	0.236842	0.625	0.759868	0.967105	0.315789
0.294872	0.394872	0.310256	0.254499	0.161954	0.290488	0.015385	0.241026	0.515385	0.751282	0.984615	0.005128	0.230769	0.461538	0.717949	0.992308	0.002564	0.274359	0.525641	0.748718	1	0.458974	0.079487	0.461538	0.046272	0.097686	0	0.002564	0.215385	0.45641	0.746154	1	0.153846	0.528205	0.825641	0.869231	0.997436	0.007692	0.264103	0.476923	0.710256	0.951282	0.466667	0.421594	0.007692	0.3	0.541026	0.753846	0.994872	0.369231
0.416382	0.262799	0.320819	0.19863	0.256849	0.164384	0.006826	0.317406	0.556314	0.761092	1	0.020478	0.191126	0.392491	0.648464	0.90785	0.003413	0.245734	0.491468	0.764505	0.993174	0.37884	0.228669	0.392491	0.075342	0.068493	0	0.003413	0.197952	0.477816	0.62116	1	0.013652	0.163823	0.395904	0.767918	0.945392	0.054608	0.34471	0.549488	0.825939	0.993174	0.559727	0.349315	0.013652	0.232082	0.464164	0.709898	0.993174	0.286689
0.220833	0.5375	0.241667	0.200837	0.125523	0.230126	0.020833	0.1625	0.258333	0.508333	0.995833	0.008333	0.429167	0.6375	0.8	1	0.004167	0.141667	0.320833	0.5875	0.979167	0.720833	0.195833	0.083333	0.037657	0.020921	0.004184	0.004167	0.408333	0.5875	0.816667	1	0.066667	0.125	0.195833	0.283333	0.35	0.025	0.041667	0.629167	0.65	0.670833	0.733333	0.217573	0.0375	0.325	0.545833	0.7375	0.979167	0.558333
0.435252	0.28777	0.276978	0.227437	0.245487	0.176895	0.010791	0.266187	0.543165	0.802158	1	0.007194	0.244604	0.47482	0.71223	0.978417	0.003597	0.219424	0.438849	0.726619	0.996403	0.543165	0.147482	0.309353	0.057762	0.086643	0.00722	0.003597	0.179856	0.489209	0.76259	1	0.151079	0.255396	0.316547	0.726619	0.902878	0.010791	0.338129	0.557554	0.661871	0.992806	0.284173	0.353791	0.039568	0.241007	0.370504	0.607914	0.985612	0.316547
0.338028	0.352113	0.309859	0.240566	0.25	0.245283	0.023474	0.258216	0.488263	0.807512	0.985915	0.014085	0.267606	0.507042	0.760563	1	0.004695	0.192488	0.469484	0.694836	0.995305	0.464789	0.375587	0.159624	0.160377	0.018868	0	0.004695	0.169014	0.422535	0.802817	1	0.065728	0.248826	0.389671	0.694836	0.971831	0.441315	0.474178	0.516432	0.821596	0.86385	0.474178	0.490566	0.018779	0.183099	0.492958	0.666667	0.957746	0.361502
0.370771	0.373478	0.255751	0.254743	0.153117	0.189702	0.002706	0.285521	0.571042	0.779432	1	0.00406	0.294993	0.549391	0.753721	0.998647	0.001353	0.181326	0.343708	0.618403	0.994587	0.525034	0.062246	0.41272	0.02981	0.070461	0	0.001353	0.41272	0.663058	0.794317	1	0.009472	0.054127	0.14885	0.656292	0.967524	0.027064	0.209743	0.366712	0.504736	0.997294	0.453315	0.352304	0.010825	0.227334	0.37889	0.656292	0.994587	0.389716
0.429224	0.296804	0.273973	0.266055	0.252294	0.137615	0.018265	0.228311	0.429224	0.652968	1	0.009132	0.246575	0.611872	0.808219	0.972603	0.004566	0.255708	0.506849	0.757991	0.986301	0.347032	0.100457	0.552511	0.045872	0.082569	0	0.004566	0.369863	0.73516	0.913242	1	0.383562	0.712329	0.789954	0.826484	0.853881	0.027397	0.173516	0.347032	0.52968	0.872146	0.447489	0.40367	0.013699	0.242009	0.589041	0.776256	0.926941	0.237443
0.347826	0.357488	0.294686	0.257282	0.194175	0.179612	0.014493	0.227053	0.463768	0.710145	1	0.009662	0.280193	0.555556	0.772947	0.995169	0.004831	0.236715	0.478261	0.695652	0.975845	0.487923	0.173913	0.338164	0.067961	0.067961	0.019417	0.004831	0.154589	0.516908	0.714976	1	0.236715	0.309179	0.63285	0.94686	0.990338	0.038647	0.342995	0.444444	0.729469	0.922705	0.47343	0.427184	0.019324	0.352657	0.516908	0.7343	0.985507	0.386473
0.331412	0.391931	0.276657	0.291908	0.196532	0.205202	0.005764	0.221902	0.455331	0.731988	1	0.017291	0.25072	0.510086	0.78098	0.994236	0.002882	0.236311	0.51585	0.73487	0.988473	0.299712	0.288184	0.412104	0.078035	0.072254	0.00289	0.002882	0.319885	0.501441	0.729107	1	0.123919	0.342939	0.489914	0.639769	0.933718	0.008646	0.227666	0.538905	0.861671	0.994236	0.501441	0.358382	0.011527	0.270893	0.530259	0.740634	0.991354	0.420749
0.377358	0.36478	0.257862	0.240506	0.183544	0.202532	0.012579	0.257862	0.603774	0.811321	1	0.037736	0.27044	0.433962	0.704403	0.987421	0.006289	0.188679	0.402516	0.616352	0.968553	0.36478	0.201258	0.433962	0.06962	0.094937	0.018987	0.006289	0.27044	0.603774	0.893082	1	0.025157	0.226415	0.314465	0.402516	0.981132	0.100629	0.201258	0.540881	0.72327	0.874214	0.371069	0.341772	0.025157	0.163522	0.377358	0.522013	0.930818	0.377358
0.380952	0.342857	0.27619	0.230769	0.269231	0.182692	0.095238	0.27619	0.504762	0.72381	0.971429	0.047619	0.333333	0.590476	0.819048	1	0.009524	0.114286	0.314286	0.628571	0.952381	0.228571	0	0.771429	0	0.076923	0	0.009524	0.057143	0.561905	0.809524	1	0	0	0	0	0	0.07619	0.285714	0.47619	0.695238	0.961905	0.333333	0.461538	0.028571	0.142857	0.466667	0.714286	0.952381	0.32381
0.349372	0.332636	0.317992	0.234801	0.232704	0.192872	0.004184	0.177824	0.472803	0.723849	1	0.01046	0.330544	0.600418	0.834728	0.997908	0.002092	0.232218	0.439331	0.646444	0.972803	0.539749	0.123431	0.33682	0.052411	0.056604	0.002096	0.002092	0.320084	0.608787	0.834728	1	0.016736	0.23431	0.328452	0.650628	0.972803	0.006276	0.154812	0.399582	0.575314	0.799163	0.543933	0.343816	0.006276	0.286611	0.479079	0.73431	0.979079	0.368201
0.332103	0.306273	0.361624	0.185185	0.244444	0.240741	0.01845	0.258303	0.479705	0.774908	0.99631	0.01476	0.228782	0.546125	0.719557	1	0.00369	0.217712	0.461255	0.715867	0.99262	0.350554	0.177122	0.472325	0.051852	0.088889	0	0.00369	0.151292	0.383764	0.634686	1	0.121771	0.295203	0.369004	0.568266	0.660517	0.01845	0.258303	0.704797	0.826568	0.99262	0.542435	0.407407	0.01476	0.217712	0.461255	0.649446	0.98893	0.335793
0.246753	0.470779	0.282468	0.214984	0.162866	0.276873	0.00974	0.237013	0.535714	0.766234	0.996753	0.006494	0.25974	0.483766	0.720779	1	0.003247	0.230519	0.474026	0.743506	0.987013	0.512987	0.288961	0.198052	0.114007	0.04886	0.009772	0.003247	0.246753	0.49026	0.75974	1	0.00974	0.279221	0.558442	0.727273	0.941558	0.035714	0.107143	0.396104	0.532468	0.993506	0.522727	0.371336	0.019481	0.327922	0.522727	0.75974	0.987013	0.461039
0.387597	0.302326	0.310078	0.21165	0.260194	0.196117	0.007752	0.251938	0.521318	0.755814	1	0.003876	0.265504	0.503876	0.746124	0.99031	0.001938	0.21124	0.467054	0.722868	0.984496	0.358527	0.075581	0.565891	0.029126	0.106796	0.001942	0.001938	0.222868	0.498062	0.757752	1	0.197674	0.261628	0.370155	0.478682	0.552326	0.003876	0.242248	0.560078	0.773256	0.994186	0.552326	0.403883	0.005814	0.26938	0.488372	0.736434	0.99031	0.348837
0.321782	0.425743	0.252475	0.258706	0.149254	0.233831	0.029703	0.391089	0.544554	0.717822	0.970297	0.009901	0.212871	0.450495	0.792079	1	0.00495	0.128713	0.356436	0.688119	0.990099	0.430693	0.138614	0.430693	0.074627	0.044776	0.004975	0.00495	0.207921	0.39604	0.871287	1	0.014851	0.128713	0.29703	0.371287	0.89604	0.019802	0.470297	0.579208	0.712871	0.861386	0.39604	0.457711	0.019802	0.282178	0.405941	0.722772	0.980198	0.445545
0.36129	0.383871	0.254839	0.275081	0.168285	0.203883	0.006452	0.23871	0.483871	0.735484	1	0.009677	0.229032	0.493548	0.770968	0.990323	0.003226	0.251613	0.496774	0.712903	0.993548	0.651613	0.077419	0.270968	0.032362	0.090615	0	0.003226	0.241935	0.522581	0.741935	1	0.248387	0.264516	0.674194	0.83871	0.993548	0.022581	0.209677	0.332258	0.709677	0.909677	0.309677	0.355987	0.009677	0.174194	0.448387	0.696774	0.993548	0.393548
0.33657	0.320388	0.343042	0.194805	0.224026	0.253247	0.006472	0.239482	0.504854	0.754045	1	0.012945	0.307443	0.533981	0.779935	0.990291	0.003236	0.213592	0.449838	0.711974	0.996764	0.501618	0.307443	0.190939	0.116883	0.045455	0.006494	0.003236	0.239482	0.511327	0.744337	1	0.009709	0.294498	0.543689	0.721683	0.990291	0.019417	0.084142	0.378641	0.76699	0.993528	0.537217	0.363636	0.012945	0.330097	0.530744	0.757282	0.996764	0.300971
0.347619	0.457143	0.195238	0.296651	0.177033	0.162679	0.014286	0.271429	0.485714	0.709524	1	0.009524	0.190476	0.42381	0.704762	0.985714	0.004762	0.409524	0.671429	0.828571	0.990476	0.542857	0.128571	0.328571	0.057416	0.095694	0.009569	0.004762	0.304762	0.471429	0.619048	1	0.219048	0.671429	0.833333	0.880952	0.995238	0.038095	0.114286	0.271429	0.757143	0.966667	0.342857	0.392344	0.090476	0.404762	0.580952	0.771429	0.990476	0.461905
0.37234	0.297872	0.329787	0.215054	0.247312	0.193548	0.021277	0.212766	0.478723	0.755319	1	0.042553	0.329787	0.468085	0.670213	0.93617	0.010638	0.159574	0.510638	0.797872	0.968085	0.329787	0.297872	0.37234	0.107527	0.064516	0.021505	0.010638	0.148936	0.468085	0.606383	1	0.042553	0.106383	0.521277	0.659574	0.968085	0.170213	0.244681	0.340426	0.808511	0.93617	0.489362	0.430108	0.042553	0.234043	0.521277	0.712766	0.968085	0.276596
0.328904	0.328904	0.342193	0.203333	0.25	0.216667	0.023256	0.252492	0.451827	0.780731	0.993355	0.009967	0.196013	0.481728	0.727575	0.990033	0.003322	0.259136	0.531561	0.754153	1	0.375415	0.17608	0.448505	0.053333	0.106667	0	0.003322	0.212625	0.461794	0.717608	1	0.149502	0.302326	0.481728	0.677741	0.767442	0.013289	0.252492	0.541528	0.843854	0.996678	0.548173	0.426667	0.006645	0.23588	0.498339	0.684385	0.990033	0.328904
0.329915	0.355556	0.31453	0.202055	0.205479	0.241438	0.006838	0.232479	0.480342	0.781197	0.998291	0.003419	0.241026	0.51453	0.77265	1	0.001709	0.261538	0.495726	0.692308	0.993162	0.512821	0.124786	0.362393	0.053082	0.070205	0.001712	0.001709	0.230769	0.512821	0.782906	1	0.011966	0.191453	0.430769	0.564103	0.994872	0.044444	0.324786	0.494017	0.688889	0.964103	0.495726	0.335616	0.005128	0.254701	0.528205	0.709402	0.993162	0.384615
0.331169	0.383117	0.285714	0.30719	0.20915	0.24183	0.038961	0.253247	0.506494	0.75974	1	0.012987	0.266234	0.551948	0.772727	0.987013	0.006494	0.168831	0.402597	0.655844	0.993506	0.454545	0.142857	0.402597	0.091503	0.078431	0.013072	0.006494	0.233766	0.584416	0.772727	1	0.012987	0.038961	0.337662	0.727273	0.909091	0.097403	0.285714	0.435065	0.636364	0.987013	0.474026	0.398693	0.006494	0.207792	0.428571	0.714286	0.993506	0.409091
0.338983	0.345763	0.315254	0.221088	0.183673	0.248299	0.020339	0.257627	0.518644	0.779661	1	0.00678	0.213559	0.481356	0.701695	0.99322	0.00339	0.267797	0.491525	0.732203	0.983051	0.386441	0.166102	0.447458	0.047619	0.108844	0	0.00339	0.189831	0.464407	0.701695	1	0.159322	0.311864	0.4	0.59661	0.684746	0.013559	0.257627	0.505085	0.80339	0.979661	0.535593	0.408163	0.023729	0.240678	0.454237	0.657627	0.983051	0.349153
0.394928	0.235507	0.369565	0.152727	0.32	0.167273	0.007246	0.231884	0.471014	0.768116	0.996377	0.01087	0.224638	0.543478	0.67029	0.963768	0.003623	0.26087	0.503623	0.742754	1	0.394928	0.188406	0.416667	0.050909	0.094545	0.007273	0.003623	0.163043	0.40942	0.666667	1	0.134058	0.300725	0.387681	0.612319	0.706522	0.036232	0.264493	0.539855	0.84058	0.992754	0.550725	0.421818	0.021739	0.23913	0.481884	0.684783	0.98913	0.271739
0.384615	0.306122	0.309262	0.218553	0.231132	0.187107	0.00314	0.288854	0.577708	0.839874	0.99843	0.00471	0.233909	0.480377	0.722135	0.993721	0.00157	0.21821	0.437991	0.660911	1	0.408163	0.128728	0.463108	0.048742	0.095912	0.004717	0.00157	0.22135	0.491366	0.769231	1	0.078493	0.246468	0.401884	0.572998	0.990581	0.018838	0.265306	0.55573	0.828885	0.971743	0.477237	0.352201	0.007849	0.213501	0.430141	0.624804	0.992151	0.33124
0.324324	0.416462	0.259214	0.276753	0.153752	0.211562	0.003686	0.214988	0.476658	0.79484	0.997543	0.002457	0.234644	0.525799	0.740786	1	0.001229	0.302211	0.471744	0.712531	0.998771	0.492629	0.12285	0.384521	0.04797	0.092251	0.00369	0.001229	0.137592	0.41769	0.67199	1	0.009828	0.321867	0.471744	0.594595	0.716216	0.040541	0.361179	0.641278	0.821867	0.995086	0.44226	0.305043	0.0086	0.289926	0.488943	0.701474	0.996314	0.444717
0.354571	0.385042	0.260388	0.266667	0.188889	0.208333	0.00831	0.299169	0.493075	0.736842	0.980609	0.00554	0.213296	0.501385	0.783934	1	0.00277	0.279778	0.495845	0.706371	0.98338	0.542936	0.290859	0.166205	0.088889	0.044444	0.005556	0.00277	0.177285	0.576177	0.792244	1	0.116343	0.238227	0.457064	0.747922	0.927978	0.310249	0.362881	0.493075	0.598338	0.980609	0.531856	0.311111	0.01108	0.240997	0.531856	0.745152	0.98892	0.398892
0.380109	0.450272	0.169619	0.33606	0.137014	0.126108	0.004087	0.192779	0.489782	0.740463	0.998638	0.001362	0.236376	0.467984	0.717302	0.996594	0.000681	0.384196	0.617166	0.83515	1	0.700272	0.105586	0.194142	0.047716	0.062713	0.006817	0.000681	0.21594	0.469346	0.737057	1	0.042916	0.356267	0.540191	0.923706	0.982289	0.020436	0.322888	0.56267	0.69891	0.936649	0.344005	0.339468	0.006812	0.371253	0.586512	0.846049	0.997275	0.465259
0.331226	0.384324	0.28445	0.264557	0.212658	0.218987	0.003793	0.235145	0.505689	0.764855	1	0.002528	0.216182	0.48799	0.740834	0.994943	0.001264	0.298357	0.506953	0.735777	0.997472	0.381795	0.109987	0.508217	0.035443	0.108861	0.002532	0.001264	0.283186	0.572693	0.816688	1	0.255373	0.453856	0.556258	0.879899	0.93426	0.020228	0.193426	0.402023	0.661188	0.997472	0.472819	0.417722	0.013906	0.288243	0.504425	0.709229	0.997472	0.4311
0.432	0.256	0.312	0.225806	0.233871	0.177419	0.048	0.272	0.52	0.776	1	0.032	0.232	0.448	0.712	0.984	0.008	0.216	0.48	0.704	0.968	0.432	0.168	0.4	0.056452	0.072581	0.008065	0.008	0.192	0.36	0.76	1	0.2	0.232	0.384	0.68	0.976	0.024	0.424	0.536	0.784	0.888	0.464	0.354839	0.016	0.352	0.504	0.696	0.968	0.248
0.321053	0.373684	0.305263	0.253968	0.216931	0.222222	0.015789	0.189474	0.484211	0.757895	1	0.010526	0.263158	0.531579	0.784211	0.984211	0.005263	0.242105	0.473684	0.678947	0.994737	0.310526	0.031579	0.657895	0.010582	0.126984	0	0.005263	0.236842	0.531579	0.863158	1	0.968421	0.968421	0.978947	0.984211	0.994737	0.047368	0.221053	0.473684	0.684211	0.915789	0.521053	0.412698	0.042105	0.294737	0.5	0.694737	0.994737	0.415789
0.43662	0.309859	0.253521	0.185714	0.257143	0.185714	0.028169	0.28169	0.492958	0.859155	1	0.084507	0.15493	0.535211	0.647887	0.915493	0.014085	0.197183	0.450704	0.56338	0.901408	0.478873	0.338028	0.183099	0.142857	0.028571	0	0.014085	0.112676	0.422535	0.633803	1	0.140845	0.211268	0.352113	0.492958	0.71831	0.788732	0.816901	0.859155	0.901408	0.957746	0.408451	0.428571	0.070423	0.239437	0.507042	0.619718	0.901408	0.338028
0.406204	0.355982	0.237814	0.281065	0.183432	0.173077	0.004431	0.264402	0.539143	0.788774	0.995569	0.002954	0.286558	0.586411	0.759232	1	0.001477	0.187592	0.373708	0.54062	0.998523	0.556869	0.144756	0.298375	0.050296	0.065089	0.011834	0.001477	0.361891	0.635155	0.799114	1	0.007386	0.096012	0.190547	0.435746	0.874446	0.115214	0.29099	0.412112	0.655835	0.994092	0.415066	0.352071	0.005908	0.193501	0.389956	0.595273	0.994092	0.385524
0.357143	0.326531	0.316327	0.309278	0.226804	0.216495	0.05102	0.244898	0.489796	0.714286	0.979592	0.030612	0.326531	0.561224	0.806122	1	0.010204	0.112245	0.316327	0.693878	0.989796	0.530612	0.469388	0	0.123711	0	0	0.010204	0.142857	0.367347	0.714286	1	0.102041	0.387755	0.571429	0.795918	0.989796	0	0	0	0	0	0.428571	0.43299	0.040816	0.132653	0.397959	0.653061	0.959184	0.27551
0.397177	0.358871	0.243952	0.266667	0.185859	0.181818	0.006048	0.185484	0.417339	0.72379	0.997984	0.004032	0.252016	0.495968	0.756048	0.991935	0.002016	0.403226	0.574597	0.774194	1	0.612903	0.165323	0.221774	0.068687	0.068687	0	0.002016	0.191532	0.366935	0.635081	1	0.235887	0.471774	0.671371	0.877016	0.977823	0.020161	0.316532	0.627016	0.784274	0.987903	0.342742	0.290909	0.020161	0.40121	0.594758	0.802419	0.989919	0.417339
0.393004	0.320988	0.286008	0.28866	0.245361	0.197938	0.006173	0.253086	0.475309	0.699588	1	0.004115	0.238683	0.54321	0.792181	0.997942	0.002058	0.234568	0.49177	0.744856	0.99177	0.444444	0.104938	0.450617	0.047423	0.092784	0.006186	0.002058	0.263374	0.555556	0.812757	1	0.26749	0.308642	0.442387	0.847737	0.934156	0.006173	0.203704	0.473251	0.621399	0.993827	0.442387	0.395876	0.010288	0.234568	0.512346	0.82716	0.99177	0.316872
0.419355	0.301075	0.27957	0.286486	0.227027	0.156757	0.032258	0.263441	0.55914	0.833333	1	0.05914	0.27957	0.510753	0.758065	0.983871	0.005376	0.16129	0.413978	0.645161	0.935484	0.413978	0.247312	0.33871	0.097297	0.064865	0.010811	0.005376	0.182796	0.575269	0.854839	1	0.010753	0.193548	0.494624	0.698925	0.77957	0.048387	0.268817	0.354839	0.645161	0.919355	0.33871	0.432432	0.016129	0.166667	0.446237	0.645161	0.951613	0.295699
0.310592	0.362657	0.32675	0.239209	0.197842	0.253597	0.005386	0.247756	0.477558	0.696589	1	0.003591	0.238779	0.506284	0.775583	0.996409	0.001795	0.245961	0.51526	0.736086	0.992819	0.576302	0.143627	0.280072	0.052158	0.084532	0.008993	0.001795	0.235189	0.536804	0.815081	1	0.059246	0.346499	0.527828	0.64991	0.969479	0.005386	0.251346	0.40395	0.671454	0.958707	0.48474	0.442446	0.014363	0.314183	0.524237	0.743268	0.992819	0.348294
0.371324	0.341912	0.286765	0.317343	0.199262	0.225092	0.007353	0.202206	0.448529	0.764706	0.996324	0.011029	0.316176	0.573529	0.753676	1	0.003676	0.231618	0.452206	0.694853	0.981618	0.636029	0.117647	0.246324	0.055351	0.055351	0.00369	0.003676	0.1875	0.477941	0.764706	1	0.110294	0.4375	0.580882	0.731618	0.919118	0.136029	0.238971	0.481618	0.544118	0.911765	0.496324	0.383764	0.029412	0.268382	0.507353	0.705882	0.981618	0.360294
0.432161	0.316583	0.251256	0.257576	0.212121	0.19697	0.01005	0.261307	0.542714	0.809045	1	0.055276	0.246231	0.462312	0.723618	0.98995	0.005025	0.18593	0.447236	0.633166	0.964824	0.386935	0.236181	0.376884	0.10101	0.070707	0.010101	0.005025	0.170854	0.557789	0.834171	1	0.01005	0.180905	0.457286	0.658291	0.733668	0.045226	0.266332	0.361809	0.773869	0.959799	0.351759	0.414141	0.015075	0.19598	0.467337	0.658291	0.964824	0.321608
0.385802	0.322531	0.291667	0.230294	0.224111	0.157651	0.003086	0.180556	0.395062	0.692901	0.99537	0.007716	0.287037	0.555556	0.790123	1	0.001543	0.337963	0.552469	0.774691	0.996914	0.342593	0.037037	0.62037	0.018547	0.092736	0.006182	0.001543	0.097222	0.291667	0.728395	1	0.009259	0.061728	0.438272	0.455247	0.859568	0.100309	0.353395	0.554012	0.753086	0.996914	0.472222	0.36476	0.013889	0.373457	0.569444	0.782407	0.996914	0.330247
0.384123	0.357234	0.258643	0.258974	0.174359	0.180769	0.005122	0.245839	0.449424	0.745198	0.996159	0.003841	0.213828	0.448143	0.714469	1	0.00128	0.329065	0.615877	0.774648	0.997439	0.590269	0.117798	0.291933	0.042308	0.067949	0.008974	0.00128	0.215109	0.364917	0.587708	1	0.037132	0.582586	0.722151	0.854033	0.959027	0.028169	0.494238	0.65557	0.807939	0.996159	0.449424	0.364103	0.006402	0.330346	0.591549	0.796415	0.997439	0.409731
0.33	0.4	0.27	0.242424	0.141414	0.212121	0.06	0.27	0.48	0.67	0.94	0.02	0.22	0.59	0.82	1	0.01	0.15	0.33	0.54	0.96	0.47	0.26	0.27	0.10101	0.080808	0	0.01	0.16	0.63	0.79	1	0.28	0.33	0.59	0.72	0.86	0.07	0.18	0.25	0.45	0.95	0.37	0.40404	0.07	0.17	0.45	0.6	0.96	0.43
0.37218	0.319549	0.308271	0.218868	0.230189	0.211321	0.007519	0.229323	0.522556	0.815789	1	0.011278	0.266917	0.484962	0.62406	0.996241	0.003759	0.18797	0.530075	0.75188	0.954887	0.552632	0.342105	0.105263	0.10566	0.015094	0	0.003759	0.285714	0.515038	0.721805	1	0.011278	0.131579	0.37218	0.676692	0.883459	0.236842	0.259398	0.928571	0.954887	0.981203	0.518797	0.354717	0.011278	0.24812	0.533835	0.714286	0.966165	0.330827
0.360419	0.323722	0.315858	0.206037	0.254593	0.206037	0.002621	0.231979	0.516383	0.777195	1	0.007864	0.292267	0.503277	0.739187	0.993447	0.001311	0.229358	0.46789	0.712975	0.998689	0.504587	0.290957	0.204456	0.112861	0.044619	0.002625	0.001311	0.235911	0.441678	0.68152	1	0.048493	0.357798	0.551769	0.685452	0.865007	0.007864	0.134993	0.879423	0.933159	0.997379	0.495413	0.383202	0.005242	0.267366	0.491481	0.722149	0.993447	0.346003
0.40404	0.318182	0.277778	0.233503	0.218274	0.162437	0.040404	0.232323	0.464646	0.762626	1	0.015152	0.247475	0.570707	0.828283	0.979798	0.005051	0.237374	0.494949	0.661616	0.878788	0.469697	0.09596	0.434343	0.060914	0.081218	0	0.005051	0.328283	0.671717	0.858586	1	0.025253	0.065657	0.712121	0.747475	0.80303	0.111111	0.232323	0.373737	0.545455	0.914141	0.449495	0.406091	0.030303	0.277778	0.510101	0.656566	0.939394	0.313131
0.367521	0.316239	0.316239	0.24339	0.232504	0.195179	0.002331	0.216006	0.483294	0.749029	0.993007	0.001554	0.227661	0.452991	0.71251	0.999223	0.000777	0.307692	0.556333	0.787102	1	0.477078	0.099456	0.423465	0.044323	0.081649	0.003888	0.000777	0.177933	0.401709	0.700078	1	0.027195	0.324786	0.540016	0.714064	0.995338	0.006216	0.346542	0.610723	0.836053	0.997669	0.503497	0.402799	0.003885	0.285936	0.531469	0.756022	0.998446	0.33411
0.400283	0.404526	0.195191	0.303116	0.148725	0.11898	0.004243	0.280057	0.437058	0.704385	1	0.002829	0.186704	0.424328	0.721358	0.998586	0.001414	0.490806	0.681754	0.838755	0.984441	0.591231	0.11174	0.29703	0.048159	0.073654	0.008499	0.001414	0.248939	0.408769	0.653465	1	0.015559	0.509194	0.623762	0.717115	0.902405	0.008487	0.189533	0.660537	0.826025	0.988685	0.417256	0.29745	0.009901	0.492221	0.663366	0.820368	0.990099	0.473833
0.243094	0.48895	0.267956	0.210526	0.144044	0.240997	0.005525	0.196133	0.359116	0.505525	0.991713	0.008287	0.323204	0.646409	0.828729	1	0.002762	0.212707	0.428177	0.649171	0.986188	0.640884	0.185083	0.174033	0.074792	0.047091	0.00831	0.002762	0.323204	0.635359	0.801105	1	0.058011	0.171271	0.309392	0.428177	0.922652	0.046961	0.118785	0.353591	0.530387	0.98895	0.599448	0.243767	0.052486	0.417127	0.657459	0.823204	0.994475	0.486188
0.38961	0.272727	0.337662	0.196078	0.261438	0.183007	0.038961	0.246753	0.577922	0.837662	0.993506	0.012987	0.214286	0.38961	0.597403	0.941558	0.006494	0.227273	0.467532	0.707792	1	0.474026	0.24026	0.285714	0.091503	0.052288	0	0.006494	0.24026	0.493506	0.831169	1	0.025974	0.318182	0.428571	0.707792	0.88961	0.064935	0.12987	0.577922	0.649351	0.824675	0.467532	0.392157	0.025974	0.331169	0.474026	0.720779	0.948052	0.266234
0.354108	0.458924	0.186969	0.292614	0.116477	0.198864	0.008499	0.215297	0.371105	0.674221	0.988669	0.005666	0.294618	0.543909	0.78187	1	0.002833	0.303116	0.498584	0.747875	0.997167	0.866856	0.036827	0.096317	0.019886	0.03125	0.014205	0.002833	0.252125	0.535411	0.776204	1	0.016997	0.022663	0.076487	0.345609	0.86119	0.067989	0.25779	0.29745	0.354108	0.569405	0.31728	0.323864	0.014164	0.314448	0.518414	0.756374	0.983003	0.444759
0.382576	0.511364	0.106061	0.353612	0.095057	0.091255	0.015152	0.223485	0.575758	0.768939	0.996212	0.011364	0.253788	0.435606	0.69697	1	0.003788	0.227273	0.632576	0.715909	0.988636	0.931818	0.011364	0.056818	0.015209	0.015209	0	0.003788	0.231061	0.473485	0.734848	1	0.32197	0.32197	0.32197	0.325758	0.67803	0.704545	0.712121	0.727273	0.761364	0.776515	0.147727	0.205323	0.087121	0.594697	0.712121	0.859848	0.988636	0.492424
0.340426	0.326241	0.333333	0.25	0.207143	0.235714	0.014184	0.269504	0.475177	0.64539	0.957447	0.021277	0.212766	0.524823	0.77305	0.985816	0.007092	0.219858	0.468085	0.794326	1	0.411348	0.319149	0.269504	0.15	0.05	0.007143	0.007092	0.22695	0.546099	0.702128	1	0.198582	0.446809	0.609929	0.822695	0.992908	0.070922	0.12766	0.262411	0.326241	0.921986	0.489362	0.414286	0.035461	0.234043	0.496454	0.787234	0.992908	0.347518
0.27957	0.461022	0.259409	0.275908	0.164199	0.216689	0.00672	0.228495	0.452957	0.696237	1	0.002688	0.254032	0.52957	0.780914	0.987903	0.001344	0.262097	0.49328	0.715054	0.994624	0.747312	0.145161	0.107527	0.069987	0.026918	0	0.001344	0.252688	0.497312	0.748656	1	0.041667	0.27957	0.534946	0.790323	0.954301	0.020161	0.125	0.348118	0.569892	0.995968	0.610215	0.347241	0.014785	0.31586	0.611559	0.797043	0.994624	0.408602
0.384516	0.27871	0.336774	0.222222	0.276486	0.189922	0.002581	0.267097	0.509677	0.752258	0.99871	0.005161	0.23871	0.487742	0.736774	1	0.00129	0.224516	0.494194	0.747097	0.997419	0.443871	0.255484	0.300645	0.104651	0.05814	0.003876	0.00129	0.207742	0.450323	0.734194	1	0.04129	0.206452	0.492903	0.809032	0.997419	0.006452	0.317419	0.543226	0.708387	0.990968	0.574194	0.408269	0.003871	0.258065	0.477419	0.745806	0.997419	0.287742
0.334158	0.363861	0.30198	0.265509	0.203474	0.220844	0.00495	0.279703	0.579208	0.824257	1	0.007426	0.252475	0.507426	0.747525	0.997525	0.002475	0.215347	0.418317	0.643564	0.938119	0.356436	0.059406	0.584158	0.034739	0.08933	0.004963	0.002475	0.25495	0.591584	0.871287	1	0.042079	0.079208	0.094059	0.413366	0.962871	0.007426	0.294554	0.487624	0.660891	0.908416	0.534653	0.411911	0.009901	0.277228	0.517327	0.695545	0.987624	0.39604
0.33	0.31	0.36	0.262626	0.252525	0.222222	0.07	0.26	0.55	0.81	1	0.03	0.17	0.38	0.71	0.98	0.01	0.27	0.49	0.7	0.97	0.4	0.34	0.26	0.090909	0.050505	0.010101	0.01	0.16	0.38	0.61	1	0.09	0.41	0.54	0.68	0.96	0.19	0.24	0.73	0.79	0.89	0.46	0.464646	0.04	0.19	0.53	0.71	0.95	0.32
0.416	0.3072	0.2768	0.25641	0.221154	0.189103	0.0048	0.2	0.4304	0.6704	0.9984	0.0032	0.2768	0.6032	0.8192	0.9968	0.0016	0.3152	0.5264	0.7376	1	0.5104	0.1616	0.328	0.070513	0.048077	0	0.0016	0.1936	0.4048	0.7904	1	0.0912	0.2816	0.7872	0.8784	0.992	0.0144	0.3472	0.4976	0.5792	0.7088	0.4192	0.394231	0.0096	0.3424	0.5968	0.8096	0.9968	0.3648
0.435233	0.259067	0.305699	0.203125	0.291667	0.192708	0.015544	0.259067	0.502591	0.772021	1	0.010363	0.176166	0.435233	0.694301	0.984456	0.005181	0.248705	0.507772	0.73057	0.994819	0.455959	0.450777	0.093264	0.125	0.03125	0	0.005181	0.274611	0.580311	0.854922	1	0.015544	0.305699	0.492228	0.65285	0.906736	0.07772	0.093264	0.227979	0.248705	0.683938	0.42487	0.458333	0.025907	0.284974	0.46114	0.694301	0.911917	0.26943
0.327273	0.409091	0.263636	0.302752	0.155963	0.211009	0.036364	0.209091	0.472727	0.690909	0.990909	0.018182	0.236364	0.518182	0.718182	0.981818	0.009091	0.245455	0.454545	0.763636	1	0.490909	0.418182	0.090909	0.110092	0.036697	0	0.009091	0.218182	0.527273	0.736364	1	0.036364	0.127273	0.463636	0.690909	0.954545	0.327273	0.336364	0.363636	0.381818	0.872727	0.518182	0.256881	0.036364	0.236364	0.463636	0.745455	0.972727	0.345455
0.41573	0.2397	0.344569	0.184211	0.255639	0.199248	0.007491	0.247191	0.516854	0.794007	1	0.018727	0.235955	0.531835	0.696629	0.996255	0.003745	0.243446	0.464419	0.715356	0.981273	0.374532	0.183521	0.441948	0.06015	0.097744	0	0.003745	0.157303	0.426966	0.692884	1	0.048689	0.292135	0.404494	0.621723	0.719101	0.018727	0.265918	0.520599	0.82397	0.992509	0.546816	0.398496	0.011236	0.228464	0.464419	0.674157	0.996255	0.265918
0.366038	0.381132	0.25283	0.26087	0.187146	0.21172	0.00566	0.145283	0.354717	0.650943	1	0.003774	0.275472	0.55283	0.773585	0.996226	0.001887	0.375472	0.562264	0.79434	0.992453	0.622642	0.160377	0.216981	0.058601	0.066163	0.00189	0.001887	0.184906	0.415094	0.726415	1	0.290566	0.420755	0.55283	0.811321	0.990566	0.007547	0.386792	0.579245	0.839623	0.984906	0.381132	0.3138	0.013208	0.401887	0.611321	0.813208	0.992453	0.403774
0.428571	0.404762	0.166667	0.361446	0.180723	0.120482	0.02381	0.345238	0.630952	0.845238	1	0.035714	0.22619	0.416667	0.642857	0.97619	0.011905	0.142857	0.333333	0.607143	0.797619	0.630952	0.261905	0.107143	0.120482	0.024096	0	0.011905	0.22619	0.511905	0.833333	1	0.130952	0.178571	0.297619	0.428571	0.619048	0.678571	0.690476	0.714286	0.738095	0.77381	0.333333	0.361446	0.059524	0.261905	0.452381	0.547619	0.77381	0.464286
0.451505	0.337793	0.210702	0.278523	0.194631	0.157718	0.006689	0.274247	0.565217	0.755853	1	0.013378	0.267559	0.458194	0.719064	0.996656	0.003344	0.16388	0.337793	0.829431	0.986622	0.618729	0.207358	0.173913	0.080537	0.053691	0.006711	0.003344	0.280936	0.518395	0.688963	1	0.060201	0.150502	0.26087	0.354515	0.889632	0.056856	0.668896	0.849498	0.946488	0.989967	0.331104	0.281879	0.013378	0.16388	0.297659	0.48495	0.986622	0.411371
0.348115	0.341463	0.310421	0.206667	0.242222	0.195556	0.008869	0.305987	0.536585	0.747228	0.986696	0.004435	0.179601	0.416851	0.767184	1	0.002217	0.274945	0.498891	0.733925	0.997783	0.43459	0.168514	0.396896	0.053333	0.088889	0.008889	0.002217	0.179601	0.492239	0.780488	1	0.219512	0.414634	0.656319	0.813747	0.922395	0.011086	0.241685	0.452328	0.691796	0.964523	0.545455	0.373333	0.015521	0.288248	0.492239	0.75388	0.984479	0.385809
0.35	0.45	0.2	0.305439	0.125523	0.138075	0.008333	0.1875	0.5125	0.766667	1	0.029167	0.2375	0.420833	0.583333	0.9875	0.004167	0.575	0.725	0.85	0.995833	0.645833	0.083333	0.270833	0.033473	0.09205	0	0.004167	0.1875	0.366667	0.5625	1	0.575	0.666667	0.6875	0.733333	0.8875	0.0125	0.5125	0.779167	0.904167	0.979167	0.2875	0.292887	0.025	0.404167	0.683333	0.829167	0.983333	0.4875
0.408616	0.287206	0.304178	0.206536	0.257516	0.151634	0.003916	0.206266	0.44517	0.712794	1	0.016971	0.25718	0.493473	0.776762	0.994778	0.001305	0.304178	0.549608	0.746736	0.997389	0.314621	0.056136	0.629243	0.019608	0.103268	0.006536	0.001305	0.165796	0.315927	0.72846	1	0.005222	0.10705	0.139687	0.219321	0.875979	0.02611	0.368146	0.575718	0.772846	0.992167	0.456919	0.381699	0.022193	0.399478	0.58094	0.775457	0.997389	0.313316
0.316731	0.338442	0.344828	0.19821	0.234015	0.240409	0.002554	0.236271	0.480204	0.716475	0.987229	0.003831	0.256705	0.514687	0.786718	1	0.001277	0.254151	0.500639	0.739464	0.998723	0.492976	0.149425	0.357599	0.063939	0.084399	0.002558	0.001277	0.206897	0.41507	0.744572	1	0.068966	0.305236	0.606641	0.795658	0.987229	0.019157	0.401022	0.547893	0.740741	0.974457	0.50447	0.363171	0.019157	0.293742	0.485313	0.749681	0.993614	0.355045
0.326923	0.370192	0.302885	0.270531	0.207729	0.241546	0.009615	0.225962	0.432692	0.677885	1	0.014423	0.264423	0.5625	0.807692	0.995192	0.004808	0.235577	0.475962	0.706731	0.908654	0.418269	0.394231	0.1875	0.130435	0.05314	0.004831	0.004808	0.283654	0.596154	0.807692	1	0.014423	0.293269	0.442308	0.610577	0.884615	0.076923	0.115385	0.264423	0.783654	0.961538	0.427885	0.444444	0.019231	0.25	0.456731	0.682692	0.889423	0.360577
0.448276	0.364532	0.187192	0.337171	0.143092	0.157895	0.004926	0.228243	0.382594	0.650246	0.995074	0.003284	0.188834	0.472906	0.727422	1	0.001642	0.546798	0.692939	0.863711	0.996716	0.663383	0.085386	0.251232	0.03125	0.067434	0.004934	0.001642	0.183908	0.349754	0.617406	1	0.047619	0.614122	0.707718	0.821018	0.906404	0.029557	0.535304	0.668309	0.885057	0.995074	0.308703	0.213816	0.00821	0.579639	0.706076	0.850575	0.99179	0.425287
0.390244	0.280488	0.329268	0.17284	0.308642	0.197531	0.02439	0.280488	0.597561	0.792683	1	0.073171	0.170732	0.329268	0.560976	0.902439	0.012195	0.256098	0.47561	0.731707	0.963415	0.634146	0.268293	0.097561	0.123457	0.024691	0	0.012195	0.231707	0.52439	0.841463	1	0.134146	0.182927	0.304878	0.426829	0.621951	0.682927	0.695122	0.719512	0.743902	0.768293	0.353659	0.395062	0.060976	0.268293	0.45122	0.54878	0.804878	0.304878
0.385714	0.404762	0.209524	0.282297	0.162679	0.177033	0.014286	0.204762	0.461905	0.719048	1	0.009524	0.242857	0.542857	0.790476	0.995238	0.004762	0.280952	0.490476	0.671429	0.97619	0.404762	0.119048	0.47619	0.057416	0.076555	0.009569	0.004762	0.1	0.261905	0.652381	1	0.133333	0.195238	0.628571	0.671429	0.938095	0.128571	0.4	0.552381	0.785714	0.990476	0.442857	0.430622	0.133333	0.342857	0.52381	0.742857	0.980952	0.419048
0.365482	0.286802	0.347716	0.190597	0.287166	0.205845	0.002538	0.255076	0.517766	0.738579	0.998731	0.005076	0.239848	0.472081	0.756345	0.993655	0.001269	0.244924	0.496193	0.743655	1	0.468274	0.238579	0.293147	0.105464	0.062262	0.003812	0.001269	0.204315	0.44797	0.733503	1	0.03934	0.248731	0.423858	0.813452	0.998731	0.006345	0.322335	0.576142	0.706853	0.991117	0.567259	0.404066	0.003807	0.261421	0.475888	0.742386	0.997462	0.319797
0.298137	0.39929	0.302573	0.218472	0.175844	0.251332	0.002662	0.24756	0.515528	0.738243	0.997338	0.001775	0.273292	0.516415	0.755989	1	0.000887	0.222715	0.463177	0.753327	0.992014	0.470275	0.171251	0.358474	0.087922	0.07016	0.002664	0.000887	0.193434	0.488909	0.740018	1	0.007986	0.200532	0.416149	0.748891	0.994676	0.04614	0.345164	0.571429	0.781721	0.968944	0.512866	0.40675	0.003549	0.262644	0.512866	0.762201	0.992014	0.404614
0.38565	0.318386	0.295964	0.252252	0.247748	0.162162	0.017937	0.224215	0.502242	0.721973	1	0.008969	0.273543	0.430493	0.690583	0.950673	0.004484	0.210762	0.600897	0.798206	0.986547	0.506726	0.125561	0.367713	0.058559	0.058559	0.004505	0.004484	0.295964	0.421525	0.704036	1	0.080717	0.139013	0.609865	0.762332	0.932735	0.017937	0.201794	0.55157	0.793722	0.986547	0.497758	0.378378	0.026906	0.300448	0.533632	0.789238	0.986547	0.331839
0.285036	0.534442	0.180523	0.283333	0.116667	0.154762	0.004751	0.19715	0.384798	0.63658	0.995249	0.016627	0.406176	0.631829	0.814727	0.997625	0.002375	0.125891	0.299287	0.501188	1	0.726841	0.149644	0.123515	0.059524	0.035714	0.002381	0.002375	0.437055	0.619952	0.807601	1	0.019002	0.114014	0.230404	0.330166	0.928741	0.009501	0.066508	0.263658	0.35867	0.895487	0.638955	0.242857	0.016627	0.36342	0.591449	0.767221	0.988124	0.505938
0.346405	0.366013	0.287582	0.243421	0.203947	0.236842	0.026144	0.313725	0.464052	0.751634	0.980392	0.013072	0.222222	0.477124	0.718954	1	0.006536	0.215686	0.535948	0.777778	0.973856	0.359477	0.30719	0.333333	0.125	0.046053	0.006579	0.006536	0.117647	0.503268	0.751634	1	0.026144	0.248366	0.614379	0.888889	0.986928	0.176471	0.326797	0.411765	0.647059	0.830065	0.392157	0.486842	0.03268	0.215686	0.535948	0.745098	0.973856	0.379085
0.37469	0.26799	0.35732	0.18408	0.261194	0.208955	0.004963	0.253102	0.533499	0.784119	1	0.009926	0.176179	0.387097	0.674938	0.997519	0.002481	0.317618	0.516129	0.761787	0.995037	0.352357	0.094293	0.55335	0.039801	0.109453	0.004975	0.002481	0.203474	0.531017	0.746898	1	0.004963	0.064516	0.148883	0.233251	0.305211	0.019851	0.364764	0.573201	0.791563	0.992556	0.593052	0.393035	0.007444	0.243176	0.466501	0.707196	0.980149	0.255583
0.563147	0.26501	0.171843	0.217842	0.157676	0.09751	0.004141	0.325052	0.544513	0.763975	1	0.014493	0.173913	0.36646	0.797101	0.995859	0.00207	0.20911	0.397516	0.587992	0.981366	0.540373	0.072464	0.387164	0.026971	0.093361	0.006224	0.00207	0.21118	0.608696	0.832298	1	0.026915	0.109731	0.196687	0.248447	0.556936	0.010352	0.380952	0.490683	0.73706	0.975155	0.256729	0.215768	0.028986	0.161491	0.250518	0.42029	0.981366	0.302277
0.324841	0.469214	0.205945	0.234043	0.134043	0.174468	0.006369	0.218684	0.41189	0.647558	1	0.012739	0.397028	0.636943	0.823779	0.995754	0.002123	0.133758	0.318471	0.564756	0.974522	0.683652	0.144374	0.171975	0.061702	0.048936	0.002128	0.002123	0.36518	0.622081	0.815287	1	0.070064	0.159236	0.269639	0.360934	0.974522	0.04034	0.178344	0.309979	0.456476	0.794055	0.484076	0.323404	0.065817	0.326964	0.539278	0.683652	0.976645	0.454352
0.409653	0.347772	0.242574	0.288724	0.185874	0.167286	0.011139	0.195545	0.518564	0.780941	1	0.00495	0.27599	0.493812	0.74505	0.997525	0.001238	0.318069	0.486386	0.662129	0.982673	0.54703	0.113861	0.339109	0.043371	0.083024	0.006196	0.001238	0.167079	0.363861	0.811881	1	0.002475	0.37005	0.506188	0.616337	0.918317	0.024752	0.393564	0.596535	0.768564	0.966584	0.419554	0.319703	0.003713	0.310644	0.461634	0.649752	0.982673	0.423267
0.333938	0.402904	0.263158	0.250909	0.158182	0.229091	0.012704	0.212341	0.508167	0.818512	1	0.00363	0.205082	0.442831	0.716878	0.99637	0.001815	0.321234	0.513612	0.718693	0.970962	0.502722	0.136116	0.361162	0.049091	0.074545	0.005455	0.001815	0.127042	0.366606	0.744102	1	0.168784	0.411978	0.560799	0.720508	0.811252	0.110708	0.346642	0.540835	0.814882	0.958258	0.473684	0.330909	0.005445	0.297641	0.470054	0.693285	0.990926	0.444646
0.33945	0.394495	0.266055	0.198157	0.239631	0.225806	0.022936	0.188073	0.522936	0.697248	1	0.009174	0.256881	0.568807	0.834862	0.995413	0.004587	0.229358	0.408257	0.642202	0.986239	0.481651	0.165138	0.353211	0.096774	0.087558	0.004608	0.004587	0.266055	0.59633	0.816514	1	0.215596	0.344037	0.412844	0.541284	0.922018	0.013761	0.12844	0.316514	0.738532	0.972477	0.522936	0.40553	0.013761	0.321101	0.610092	0.811927	0.986239	0.366972
0.341584	0.386139	0.272277	0.273632	0.199005	0.19403	0.014851	0.267327	0.460396	0.69802	1	0.009901	0.183168	0.415842	0.752475	0.99505	0.00495	0.361386	0.594059	0.821782	0.990099	0.485149	0.173267	0.341584	0.059701	0.069652	0.0199	0.00495	0.153465	0.519802	0.712871	1	0.232673	0.292079	0.628713	0.945545	0.990099	0.039604	0.336634	0.435644	0.727723	0.920792	0.475248	0.41791	0.019802	0.346535	0.509901	0.747525	0.985149	0.371287
0.310734	0.449153	0.240113	0.246459	0.144476	0.229462	0.011299	0.288136	0.545198	0.740113	0.99435	0.00565	0.180791	0.432203	0.757062	0.988701	0.002825	0.327684	0.522599	0.725989	1	0.615819	0.186441	0.19774	0.073654	0.045326	0	0.002825	0.158192	0.381356	0.793785	1	0.149718	0.426554	0.536723	0.677966	0.813559	0.262712	0.403955	0.632768	0.757062	0.963277	0.548023	0.322946	0.008475	0.206215	0.488701	0.748588	0.997175	0.440678
0.318623	0.43248	0.248897	0.242049	0.174912	0.218198	0.00353	0.247132	0.507502	0.76346	0.992056	0.001765	0.313327	0.541041	0.759047	1	0.000883	0.181818	0.399823	0.699029	0.994704	0.640777	0.059135	0.300088	0.036219	0.060954	0.00265	0.000883	0.40865	0.578994	0.768756	1	0.007944	0.227714	0.739629	0.793469	0.954987	0.031774	0.157988	0.269197	0.390997	0.969991	0.424537	0.392226	0.002648	0.217123	0.445719	0.721977	0.978817	0.43248
0.386364	0.378788	0.234848	0.267176	0.160305	0.152672	0.037879	0.30303	0.560606	0.780303	0.992424	0.045455	0.25	0.537879	0.787879	1	0.007576	0.098485	0.310606	0.530303	0.833333	0.469697	0.19697	0.333333	0.061069	0.045802	0.015267	0.007576	0.295455	0.469697	0.878788	1	0.015152	0.212121	0.424242	0.5	0.818182	0.05303	0.128788	0.590909	0.674242	0.80303	0.310606	0.274809	0.022727	0.181818	0.416667	0.590909	0.863636	0.378788
0.34126	0.311534	0.347206	0.211905	0.264286	0.213095	0.003567	0.248514	0.483948	0.751486	0.995244	0.002378	0.241379	0.543401	0.776457	1	0.001189	0.250892	0.48038	0.709869	0.998811	0.454221	0.197384	0.348395	0.080952	0.085714	0.007143	0.001189	0.24019	0.487515	0.740785	1	0.005945	0.210464	0.428062	0.812128	0.902497	0.070155	0.262782	0.551724	0.758621	0.997622	0.521998	0.457143	0.004756	0.239001	0.488704	0.760999	0.998811	0.323424
0.37051	0.321361	0.308129	0.210227	0.263258	0.193182	0.005671	0.272212	0.533081	0.754253	0.996219	0.003781	0.258979	0.489603	0.727788	1	0.00189	0.20794	0.47259	0.746692	0.99811	0.451796	0.177694	0.37051	0.087121	0.081439	0.001894	0.00189	0.336484	0.534972	0.786389	0.994329	0.069943	0.440454	0.759924	0.858223	1	0.013233	0.181474	0.325142	0.565217	0.931947	0.531191	0.390152	0.009452	0.221172	0.406427	0.708885	0.99811	0.342155
0.314961	0.370079	0.314961	0.261905	0.222222	0.206349	0.015748	0.228346	0.456693	0.732283	1	0.007874	0.173228	0.488189	0.740157	0.992126	0.031496	0.267717	0.527559	0.80315	0.984252	0.393701	0.322835	0.283465	0.111111	0.063492	0.015873	0.007874	0.370079	0.559055	0.748031	1	0.023622	0.322835	0.511811	0.700787	0.952756	0.07874	0.141732	0.212598	0.779528	0.858268	0.472441	0.47619	0.031496	0.283465	0.566929	0.740157	0.968504	0.409449
0.375172	0.308966	0.315862	0.208564	0.243094	0.214088	0.004138	0.224828	0.526897	0.783448	1	0.002759	0.296552	0.503448	0.73931	0.995862	0.001379	0.216552	0.467586	0.704828	0.997241	0.475862	0.350345	0.173793	0.13674	0.029006	0.001381	0.001379	0.21931	0.422069	0.692414	1	0.004138	0.325517	0.517241	0.675862	0.995862	0.033103	0.147586	0.882759	0.928276	0.987586	0.49931	0.375691	0.008276	0.277241	0.503448	0.724138	0.997241	0.33931
0.353659	0.292683	0.353659	0.197531	0.246914	0.222222	0.060976	0.256098	0.414634	0.621951	0.95122	0.02439	0.158537	0.634146	0.841463	0.97561	0.012195	0.195122	0.439024	0.682927	1	0.378049	0.292683	0.329268	0.098765	0.074074	0	0.012195	0.121951	0.54878	0.829268	1	0.036585	0.280488	0.597561	0.731707	0.804878	0.134146	0.195122	0.426829	0.512195	0.939024	0.426829	0.493827	0.036585	0.170732	0.463415	0.646341	0.963415	0.292683
0.473896	0.228916	0.297189	0.205645	0.290323	0.133065	0.016064	0.24498	0.48996	0.751004	1	0.036145	0.240964	0.554217	0.767068	0.97992	0.004016	0.220884	0.433735	0.698795	0.987952	0.48996	0.236948	0.273092	0.092742	0.068548	0.004032	0.004016	0.168675	0.522088	0.751004	1	0.076305	0.273092	0.441767	0.702811	0.915663	0.008032	0.349398	0.48996	0.803213	0.951807	0.341365	0.33871	0.008032	0.248996	0.570281	0.759036	0.987952	0.261044
0.453202	0.344828	0.20197	0.30198	0.20297	0.128713	0.009852	0.270936	0.536946	0.753695	0.995074	0.019704	0.211823	0.507389	0.783251	1	0.004926	0.261084	0.428571	0.576355	0.990148	0.536946	0.128079	0.334975	0.074257	0.064356	0.00495	0.004926	0.216749	0.374384	0.788177	1	0.108374	0.339901	0.522167	0.655172	0.862069	0.019704	0.389163	0.571429	0.748768	0.985222	0.330049	0.366337	0.019704	0.20197	0.44335	0.581281	0.985222	0.344828
0.347165	0.417704	0.235131	0.270083	0.171745	0.17867	0.008299	0.261411	0.547718	0.775934	1	0.011065	0.26971	0.525588	0.757953	0.998617	0.001383	0.211618	0.392808	0.69018	0.991701	0.759336	0.107884	0.13278	0.044321	0.044321	0.00277	0.001383	0.304288	0.550484	0.780083	1	0.002766	0.215768	0.319502	0.576763	0.858921	0.058091	0.192254	0.298755	0.687414	0.959889	0.392808	0.357341	0.002766	0.211618	0.417704	0.596127	0.97787	0.42462
0.395904	0.331058	0.273038	0.270548	0.226027	0.167808	0.010239	0.228669	0.484642	0.764505	1	0.006826	0.204778	0.457338	0.59727	0.989761	0.003413	0.327645	0.641638	0.819113	0.996587	0.546075	0.201365	0.25256	0.085616	0.065068	0.003425	0.003413	0.255973	0.498294	0.641638	1	0.068259	0.191126	0.242321	0.720137	0.955631	0.013652	0.416382	0.682594	0.849829	0.993174	0.409556	0.349315	0.017065	0.423208	0.607509	0.8157	0.996587	0.34471
0.36833	0.309811	0.321859	0.187931	0.239655	0.213793	0.003442	0.228916	0.483649	0.741824	0.998279	0.013769	0.246127	0.433735	0.774527	1	0.001721	0.261618	0.531842	0.752151	0.991394	0.44062	0.015491	0.54389	0.012069	0.105172	0.001724	0.001721	0.215146	0.327022	0.54389	1	0.024096	0.158348	0.16179	0.234079	0.450947	0.041308	0.461274	0.640275	0.814114	0.996558	0.535284	0.427586	0.015491	0.297762	0.535284	0.75043	0.991394	0.318417
0.352448	0.334266	0.313287	0.22549	0.232493	0.214286	0.002797	0.278322	0.535664	0.777622	1	0.004196	0.205594	0.448951	0.696503	0.994406	0.001399	0.272727	0.527273	0.759441	0.998601	0.373427	0.19021	0.436364	0.095238	0.072829	0.005602	0.001399	0.254545	0.507692	0.8	1	0.012587	0.193007	0.441958	0.881119	0.998601	0.034965	0.286713	0.531469	0.683916	0.93007	0.525874	0.386555	0.013986	0.26993	0.48951	0.724476	0.998601	0.352448
0.366925	0.421189	0.211886	0.264249	0.129534	0.173575	0.020672	0.310078	0.434109	0.723514	0.989664	0.007752	0.178295	0.472868	0.687339	1	0.002584	0.242894	0.630491	0.819121	0.992248	0.635659	0.118863	0.245478	0.041451	0.041451	0	0.002584	0.165375	0.447028	0.651163	1	0.124031	0.630491	0.739018	0.863049	0.94832	0.25323	0.333333	0.563307	0.777778	0.96124	0.364341	0.316062	0.007752	0.263566	0.565891	0.751938	0.992248	0.44186
0.368864	0.417952	0.213184	0.280899	0.151685	0.161517	0.002805	0.235624	0.429173	0.667602	0.998597	0.004208	0.290323	0.608696	0.810659	1	0.001403	0.231417	0.464236	0.681627	0.997195	0.706872	0.145863	0.147265	0.075843	0.047753	0	0.001403	0.308555	0.605891	0.786816	1	0.00561	0.224404	0.352034	0.546985	0.995792	0.02805	0.15568	0.269285	0.509116	0.848527	0.45021	0.33427	0.007013	0.339411	0.628331	0.812062	0.99439	0.415147
0.437956	0.321168	0.240876	0.323529	0.198529	0.132353	0.014599	0.291971	0.518248	0.781022	1	0.021898	0.182482	0.474453	0.70073	0.970803	0.007299	0.211679	0.459854	0.635036	0.934307	0.467153	0.211679	0.321168	0.088235	0.088235	0	0.007299	0.226277	0.459854	0.722628	1	0.036496	0.080292	0.489051	0.817518	0.890511	0.138686	0.29927	0.583942	0.664234	0.978102	0.386861	0.352941	0.036496	0.226277	0.452555	0.635036	0.934307	0.277372
0.311258	0.397351	0.291391	0.246667	0.186667	0.26	0.039735	0.238411	0.463576	0.715232	1	0.013245	0.225166	0.523179	0.748344	0.986755	0.006623	0.245033	0.509934	0.721854	0.97351	0.490066	0.125828	0.384106	0.066667	0.093333	0	0.006623	0.139073	0.516556	0.774834	1	0.019868	0.311258	0.443709	0.622517	0.768212	0.18543	0.271523	0.503311	0.688742	0.92053	0.490066	0.4	0.033113	0.251656	0.509934	0.688742	0.960265	0.390728
0.362708	0.309068	0.328225	0.221228	0.257033	0.195652	0.007663	0.293742	0.53129	0.749681	0.994891	0.002554	0.219668	0.473819	0.729246	0.997446	0.001277	0.217114	0.44189	0.772669	1	0.47765	0.246488	0.275862	0.086957	0.066496	0.002558	0.001277	0.236271	0.537676	0.753512	1	0.005109	0.251596	0.505747	0.772669	0.971903	0.066411	0.283525	0.402299	0.727969	0.996169	0.538953	0.375959	0.006386	0.215837	0.427842	0.722861	0.996169	0.357599
0.326336	0.387405	0.28626	0.23327	0.160612	0.229446	0.017176	0.278626	0.562977	0.839695	0.992366	0.003817	0.198473	0.492366	0.73855	0.998092	0.001908	0.253817	0.444656	0.650763	1	0.454198	0.076336	0.469466	0.024857	0.07457	0.005736	0.001908	0.259542	0.620229	0.841603	1	0.05916	0.175573	0.206107	0.59542	0.803435	0.005725	0.312977	0.482824	0.650763	0.98855	0.526718	0.305927	0.007634	0.242366	0.484733	0.667939	0.996183	0.417939
0.369942	0.369942	0.260116	0.284884	0.197674	0.238372	0.011561	0.202312	0.445087	0.803468	1	0.023121	0.260116	0.49711	0.716763	0.99422	0.00578	0.254335	0.520231	0.710983	0.965318	0.566474	0.179191	0.254335	0.052326	0.075581	0.005814	0.00578	0.17341	0.34104	0.624277	1	0.242775	0.393064	0.635838	0.682081	0.884393	0.023121	0.491329	0.734104	0.797688	0.965318	0.549133	0.337209	0.023121	0.33526	0.554913	0.710983	0.965318	0.398844
0.424556	0.318047	0.257396	0.266667	0.182222	0.174815	0.004438	0.16716	0.525148	0.77071	1	0.002959	0.247041	0.461538	0.744083	0.992604	0.001479	0.307692	0.498521	0.720414	0.997041	0.507396	0.130178	0.362426	0.042963	0.084444	0.004444	0.001479	0.150888	0.52071	0.761834	1	0.122781	0.329882	0.470414	0.678994	0.997041	0.094675	0.279586	0.498521	0.775148	0.926036	0.442308	0.331852	0.079882	0.273669	0.451183	0.701183	0.997041	0.356509
0.330855	0.360595	0.30855	0.208955	0.208955	0.227612	0.01487	0.178439	0.431227	0.70632	0.992565	0.007435	0.297398	0.546468	0.810409	1	0.003717	0.260223	0.505576	0.69145	0.98513	0.457249	0.200743	0.342007	0.093284	0.070896	0.011194	0.003717	0.289963	0.505576	0.851301	1	0.122677	0.315985	0.486989	0.672862	0.907063	0.011152	0.104089	0.449814	0.713755	0.914498	0.531599	0.395522	0.02974	0.315985	0.498141	0.69145	0.98513	0.405204
0.385185	0.377778	0.237037	0.276119	0.208955	0.216418	0.044444	0.281481	0.511111	0.8	1	0.02963	0.237037	0.4	0.711111	0.985185	0.007407	0.155556	0.577778	0.762963	0.955556	0.674074	0.17037	0.155556	0.052239	0.067164	0.022388	0.007407	0.2	0.37037	0.651852	1	0.022222	0.555556	0.822222	0.888889	0.933333	0.037037	0.459259	0.622222	0.718519	0.97037	0.377778	0.41791	0.022222	0.377778	0.474074	0.718519	0.985185	0.355556
0.349206	0.392416	0.258377	0.269197	0.172992	0.203883	0.002646	0.250441	0.516755	0.77866	1	0.001764	0.22134	0.492063	0.76455	0.998236	0.000882	0.263668	0.477072	0.687831	0.989418	0.600529	0.13933	0.260141	0.067961	0.064431	0.004413	0.000882	0.208995	0.511464	0.75485	1	0.034392	0.382716	0.529982	0.708995	0.935626	0.008818	0.236332	0.371252	0.783069	0.989418	0.492945	0.372462	0.008818	0.203704	0.442681	0.671958	0.992945	0.385362
0.444444	0.261111	0.294444	0.256983	0.307263	0.122905	0.011111	0.25	0.494444	0.738889	1	0.016667	0.194444	0.394444	0.688889	0.977778	0.005556	0.283333	0.533333	0.788889	0.966667	0.383333	0.283333	0.333333	0.094972	0.050279	0.01676	0.005556	0.116667	0.466667	0.727778	1	0.083333	0.211111	0.516667	0.866667	0.972222	0.088889	0.394444	0.588889	0.766667	0.911111	0.427778	0.435754	0.083333	0.283333	0.544444	0.761111	0.977778	0.283333
0.364094	0.336409	0.299497	0.225021	0.207389	0.214945	0.002517	0.213926	0.472315	0.745805	1	0.001678	0.246644	0.511745	0.732383	0.997483	0.000839	0.290268	0.538591	0.77349	0.993289	0.416107	0.156879	0.427013	0.055416	0.078925	0.001679	0.000839	0.202181	0.473993	0.744128	1	0.003356	0.315436	0.462248	0.59396	0.908557	0.006711	0.265101	0.529362	0.759228	0.987416	0.505872	0.327456	0.008389	0.32802	0.543624	0.765101	0.990772	0.360738
0.3711	0.417077	0.211823	0.291118	0.149671	0.179276	0.006568	0.244663	0.441708	0.71757	0.998358	0.003284	0.195402	0.44335	0.729064	0.996716	0.001642	0.45977	0.632184	0.793103	1	0.658456	0.119869	0.221675	0.03125	0.057566	0.008224	0.001642	0.167488	0.331691	0.622332	1	0.507389	0.640394	0.783251	0.876847	0.996716	0.006568	0.482759	0.632184	0.765189	0.950739	0.330049	0.223684	0.021346	0.536946	0.694581	0.834154	0.995074	0.431856
0.446009	0.29108	0.262911	0.207547	0.264151	0.150943	0.00939	0.253521	0.478873	0.71831	0.995305	0.014085	0.328638	0.605634	0.816901	0.985915	0.004695	0.206573	0.408451	0.652582	1	0.516432	0.234742	0.248826	0.108491	0.042453	0.014151	0.004695	0.328638	0.525822	0.769953	1	0.032864	0.253521	0.384977	0.877934	0.948357	0.014085	0.103286	0.43662	0.58216	0.694836	0.262911	0.320755	0.018779	0.15493	0.356808	0.633803	0.938967	0.28169
0.373626	0.344041	0.282333	0.236041	0.205584	0.193739	0.002536	0.202029	0.431107	0.716822	0.999155	0.001691	0.258664	0.509721	0.75317	0.995773	0.000845	0.344041	0.543533	0.764159	1	0.415046	0.114117	0.470837	0.038917	0.093063	0.003384	0.000845	0.209637	0.46492	0.726965	1	0.034658	0.474218	0.621302	0.897718	0.989856	0.003381	0.248521	0.482671	0.760778	0.993238	0.457312	0.328257	0.003381	0.393068	0.596788	0.795435	0.997464	0.373626
0.438017	0.272727	0.289256	0.208333	0.233333	0.191667	0.016529	0.206612	0.471074	0.719008	1	0.041322	0.256198	0.553719	0.735537	0.983471	0.008264	0.247934	0.495868	0.694215	0.991736	0.421488	0.157025	0.421488	0.041667	0.091667	0.008333	0.008264	0.198347	0.619835	0.892562	1	0.22314	0.247934	0.355372	0.396694	0.702479	0.033058	0.14876	0.520661	0.77686	0.884298	0.429752	0.35	0.057851	0.347107	0.495868	0.68595	0.917355	0.239669
0.368421	0.359649	0.27193	0.20354	0.230088	0.20354	0.026316	0.254386	0.491228	0.807018	1	0.017544	0.219298	0.429825	0.622807	0.95614	0.008772	0.166667	0.587719	0.798246	0.964912	0.359649	0.27193	0.368421	0.106195	0.070796	0.017699	0.008772	0.175439	0.464912	0.763158	1	0.04386	0.105263	0.394737	0.578947	0.850877	0.184211	0.263158	0.666667	0.780702	0.95614	0.429825	0.389381	0.052632	0.236842	0.473684	0.666667	0.938596	0.315789
0.383249	0.398477	0.218274	0.333333	0.16285	0.160305	0.01269	0.274112	0.467005	0.753807	1	0.005076	0.271574	0.527919	0.730964	0.994924	0.002538	0.180203	0.489848	0.769036	0.989848	0.713198	0.137056	0.149746	0.05598	0.050891	0.005089	0.002538	0.225888	0.428934	0.695431	1	0.010152	0.251269	0.64467	0.784264	0.98731	0.058376	0.489848	0.593909	0.819797	0.939086	0.357868	0.300254	0.040609	0.203046	0.451777	0.730964	0.989848	0.439086
0.360424	0.286219	0.353357	0.205674	0.241135	0.202128	0.007067	0.24735	0.526502	0.812721	0.992933	0.014134	0.279152	0.512367	0.731449	1	0.003534	0.226148	0.459364	0.696113	0.968198	0.409894	0.176678	0.413428	0.06383	0.092199	0	0.003534	0.190813	0.44523	0.696113	1	0.123675	0.289753	0.540636	0.583039	0.975265	0.024735	0.243816	0.4947	0.787986	0.939929	0.551237	0.397163	0.014134	0.229682	0.466431	0.664311	0.992933	0.286219
0.379032	0.419355	0.201613	0.341463	0.170732	0.130081	0.032258	0.217742	0.395161	0.653226	1	0.016129	0.258065	0.556452	0.830645	0.983871	0.008065	0.16129	0.483871	0.66129	0.951613	0.572581	0.048387	0.379032	0.056911	0.04065	0.00813	0.008065	0.258065	0.669355	0.814516	1	0.66129	0.66129	0.879032	0.887097	0.951613	0.080645	0.16129	0.33871	0.435484	0.653226	0.346774	0.406504	0.104839	0.193548	0.459677	0.677419	0.951613	0.435484
0.337143	0.445714	0.217143	0.333333	0.172414	0.189655	0.028571	0.211429	0.451429	0.697143	0.994286	0.011429	0.234286	0.52	0.782857	1	0.005714	0.291429	0.497143	0.68	0.954286	0.611429	0.154286	0.234286	0.063218	0.051724	0.017241	0.005714	0.165714	0.32	0.605714	1	0.017143	0.445714	0.657143	0.714286	0.845714	0.022857	0.48	0.737143	0.794286	0.937143	0.382857	0.402299	0.022857	0.285714	0.445714	0.657143	0.965714	0.417143
0.316327	0.331633	0.352041	0.2	0.241026	0.235897	0.010204	0.229592	0.484694	0.709184	0.994898	0.02551	0.239796	0.510204	0.826531	1	0.005102	0.244898	0.459184	0.673469	0.989796	0.382653	0.403061	0.214286	0.164103	0.030769	0	0.005102	0.219388	0.515306	0.755102	1	0.015306	0.173469	0.47449	0.683673	0.989796	0.336735	0.382653	0.438776	0.790816	0.846939	0.479592	0.451282	0.020408	0.362245	0.505102	0.693878	0.959184	0.30102
0.360294	0.25	0.389706	0.177778	0.251852	0.162963	0.036765	0.25	0.477941	0.735294	0.985294	0.051471	0.330882	0.514706	0.625	0.977941	0.007353	0.205882	0.404412	0.786765	1	0.595588	0.397059	0.007353	0.140741	0.007407	0.007407	0.007353	0.367647	0.544118	0.691176	1	0.014706	0.161765	0.316176	0.794118	0.992647	0.397059	0.397059	0.397059	0.397059	0.397059	0.536765	0.340741	0.014706	0.323529	0.558824	0.772059	0.977941	0.227941
0.274725	0.483516	0.241758	0.238971	0.136029	0.220588	0.014652	0.175824	0.417582	0.739927	0.978022	0.007326	0.238095	0.47619	0.714286	1	0.003663	0.358974	0.615385	0.791209	0.956044	0.47619	0.238095	0.285714	0.069853	0.055147	0.003676	0.003663	0.271062	0.413919	0.659341	1	0.131868	0.227106	0.538462	0.710623	0.835165	0.010989	0.076923	0.608059	0.893773	0.978022	0.571429	0.301471	0.018315	0.307692	0.549451	0.728938	0.992674	0.516484
0.406452	0.258065	0.335484	0.181818	0.279221	0.181818	0.019355	0.245161	0.483871	0.741935	1	0.012903	0.264516	0.470968	0.677419	0.993548	0.006452	0.225806	0.496774	0.787097	0.974194	0.335484	0.270968	0.393548	0.097403	0.071429	0.019481	0.006452	0.187097	0.587097	0.767742	1	0.058065	0.277419	0.632258	0.890323	0.980645	0.019355	0.212903	0.387097	0.483871	0.825806	0.380645	0.467532	0.03871	0.219355	0.535484	0.748387	0.967742	0.264516
0.350649	0.402597	0.246753	0.342105	0.236842	0.171053	0.025974	0.168831	0.467532	0.805195	0.987013	0.077922	0.25974	0.441558	0.662338	1	0.012987	0.181818	0.480519	0.701299	0.935065	0.584416	0.298701	0.116883	0.131579	0.026316	0	0.012987	0.233766	0.519481	0.727273	1	0.142857	0.194805	0.311688	0.493506	0.701299	0.766234	0.779221	0.805195	0.831169	0.87013	0.363636	0.394737	0.064935	0.285714	0.506494	0.61039	0.87013	0.428571
0.313433	0.380597	0.30597	0.233083	0.18797	0.157895	0.037313	0.238806	0.567164	0.761194	0.985075	0.029851	0.261194	0.440299	0.649254	0.977612	0.007463	0.179104	0.514925	0.738806	1	0.574627	0.350746	0.074627	0.225564	0.030075	0	0.007463	0.261194	0.477612	0.746269	1	0.014925	0.149254	0.410448	0.604478	0.992537	0.873134	0.880597	0.925373	0.940299	0.962687	0.5	0.345865	0.044776	0.253731	0.552239	0.738806	0.970149	0.425373
0.393939	0.338384	0.267677	0.263959	0.203046	0.187817	0.010101	0.227273	0.520202	0.80303	0.994949	0.030303	0.237374	0.464646	0.727273	1	0.005051	0.252525	0.479798	0.636364	0.989899	0.5	0.141414	0.358586	0.071066	0.071066	0	0.005051	0.358586	0.540404	0.707071	1	0.333333	0.388889	0.530303	0.621212	0.742424	0.015152	0.09596	0.227273	0.858586	0.984848	0.373737	0.365482	0.030303	0.20202	0.373737	0.616162	0.984848	0.338384
0.323232	0.358586	0.318182	0.218274	0.218274	0.233503	0.040404	0.353535	0.585859	0.79798	0.964646	0.010101	0.151515	0.424242	0.686869	1	0.005051	0.232323	0.454545	0.707071	0.979798	0.510101	0.348485	0.141414	0.126904	0.045685	0.005076	0.005051	0.176768	0.429293	0.717172	1	0.237374	0.419192	0.555556	0.757576	0.984848	0.015152	0.045455	0.287879	0.89899	0.959596	0.388889	0.385787	0.020202	0.252525	0.520202	0.691919	0.979798	0.363636
0.355346	0.314465	0.330189	0.215748	0.247244	0.223622	0.003145	0.237421	0.528302	0.779874	0.990566	0.012579	0.207547	0.448113	0.677673	1	0.001572	0.287736	0.539308	0.773585	0.998428	0.383648	0.190252	0.426101	0.075591	0.07874	0.006299	0.001572	0.289308	0.517296	0.801887	1	0.006289	0.193396	0.356918	0.858491	0.996855	0.031447	0.267296	0.537736	0.666667	0.946541	0.566038	0.387402	0.007862	0.254717	0.471698	0.712264	0.998428	0.33805
0.366972	0.321101	0.311927	0.259259	0.25	0.185185	0.045872	0.266055	0.495413	0.798165	1	0.018349	0.247706	0.46789	0.66055	0.944954	0.009174	0.192661	0.486239	0.715596	0.972477	0.302752	0.266055	0.431193	0.092593	0.074074	0.018519	0.009174	0.247706	0.522936	0.642202	1	0.155963	0.211009	0.568807	0.688073	0.963303	0.027523	0.119266	0.357798	0.788991	0.926606	0.477064	0.444444	0.027523	0.220183	0.522936	0.715596	0.954128	0.302752
0.406433	0.368421	0.225146	0.31085	0.14956	0.187683	0.011696	0.25731	0.549708	0.774854	1	0.005848	0.216374	0.461988	0.736842	0.997076	0.002924	0.263158	0.491228	0.701754	0.97076	0.584795	0.154971	0.260234	0.064516	0.070381	0	0.002924	0.192982	0.385965	0.74269	1	0.105263	0.184211	0.5	0.614035	0.979532	0.049708	0.476608	0.681287	0.868421	0.935673	0.418129	0.357771	0.023392	0.25731	0.5	0.74269	0.98538	0.397661
0.506369	0.288217	0.205414	0.299841	0.236045	0.118022	0.006369	0.246815	0.549363	0.765924	0.998408	0.003185	0.227707	0.452229	0.66879	0.992038	0.001592	0.261146	0.480892	0.742038	1	0.568471	0.082803	0.348726	0.031898	0.095694	0.00319	0.001592	0.187898	0.47293	0.753185	1	0.052548	0.237261	0.414013	0.468153	0.882166	0.020701	0.363057	0.578025	0.780255	0.984076	0.294586	0.299841	0.007962	0.270701	0.444268	0.652866	0.980892	0.363057
0.418605	0.348837	0.232558	0.3125	0.226562	0.1875	0.062016	0.325581	0.573643	0.821705	1	0.015504	0.186047	0.472868	0.744186	0.992248	0.007752	0.193798	0.410853	0.542636	0.945736	0.534884	0.139535	0.325581	0.0625	0.078125	0	0.007752	0.302326	0.697674	0.829457	1	0.023256	0.108527	0.147287	0.503876	0.914729	0.209302	0.27907	0.44186	0.565891	0.651163	0.387597	0.421875	0.015504	0.155039	0.372093	0.627907	0.829457	0.333333
0.436893	0.271845	0.291262	0.323529	0.254902	0.127451	0.07767	0.31068	0.533981	0.776699	1	0.029126	0.23301	0.514563	0.796117	0.970874	0.009709	0.145631	0.38835	0.660194	0.873786	0.446602	0.203883	0.349515	0.078431	0.058824	0	0.009709	0.242718	0.737864	0.883495	1	0.038835	0.281553	0.368932	0.417476	0.504854	0.067961	0.145631	0.582524	0.669903	0.873786	0.368932	0.392157	0.038835	0.242718	0.38835	0.601942	0.815534	0.330097
0.366667	0.406667	0.226667	0.255034	0.187919	0.187919	0.02	0.14	0.38	0.72	0.993333	0.013333	0.373333	0.553333	0.74	0.966667	0.006667	0.246667	0.42	0.713333	1	0.533333	0.273333	0.193333	0.107383	0.040268	0	0.006667	0.16	0.46	0.753333	1	0.026667	0.28	0.366667	0.693333	0.886667	0.146667	0.566667	0.613333	0.766667	0.82	0.44	0.348993	0.026667	0.34	0.533333	0.726667	0.946667	0.413333
0.3	0.285714	0.414286	0.188406	0.246377	0.15942	0.042857	0.214286	0.442857	0.714286	0.957143	0.057143	0.328571	0.414286	0.642857	0.942857	0.014286	0.142857	0.557143	0.785714	1	0.4	0.4	0.2	0.188406	0.043478	0.014493	0.014286	0.314286	0.628571	0.828571	1	0.228571	0.371429	0.571429	0.785714	0.914286	0.057143	0.085714	0.142857	0.185714	0.514286	0.571429	0.26087	0.057143	0.371429	0.514286	0.771429	0.928571	0.314286
0.438326	0.356828	0.204846	0.324503	0.183223	0.134658	0.006608	0.185022	0.453744	0.720264	0.997797	0.004405	0.251101	0.45815	0.737885	0.993392	0.002203	0.414097	0.610132	0.810573	1	0.464758	0.218062	0.317181	0.081678	0.081678	0.002208	0.002203	0.207048	0.440529	0.740088	1	0.048458	0.286344	0.513216	0.73348	0.991189	0.008811	0.253304	0.537445	0.757709	0.993392	0.433921	0.322296	0.008811	0.244493	0.484581	0.73348	0.993392	0.400881
0.411215	0.299065	0.28972	0.320755	0.283019	0.150943	0.046729	0.280374	0.514019	0.738318	0.981308	0.018692	0.233645	0.429907	0.728972	0.953271	0.009346	0.205607	0.504673	0.757009	1	0.504673	0.252336	0.242991	0.113208	0.056604	0	0.009346	0.121495	0.439252	0.794393	1	0.373832	0.420561	0.663551	0.859813	0.971963	0.168224	0.271028	0.336449	0.514019	0.579439	0.364486	0.415094	0.037383	0.242991	0.420561	0.654206	0.971963	0.280374
0.444444	0.197531	0.358025	0.225	0.3125	0.125	0.074074	0.296296	0.54321	0.765432	1	0.061728	0.197531	0.45679	0.790123	0.938272	0.012346	0.222222	0.395062	0.62963	0.950617	0.259259	0.320988	0.419753	0.1125	0.0375	0.0125	0.012346	0.185185	0.345679	0.481481	1	0.024691	0.08642	0.246914	0.358025	0.518519	0.530864	0.617284	0.728395	0.851852	0.962963	0.407407	0.425	0.024691	0.222222	0.395062	0.54321	0.938272	0.185185
0.323232	0.373737	0.30303	0.233503	0.182741	0.243655	0.010101	0.227273	0.515152	0.80303	0.969697	0.10101	0.292929	0.520202	0.732323	0.994949	0.005051	0.151515	0.414141	0.671717	1	0.575758	0.161616	0.262626	0.055838	0.06599	0.015228	0.005051	0.313131	0.580808	0.828283	1	0.025253	0.060606	0.277778	0.343434	0.459596	0.080808	0.146465	0.570707	0.737374	0.893939	0.565657	0.324873	0.025253	0.20202	0.40404	0.616162	0.984848	0.348485
0.400947	0.318863	0.280189	0.237757	0.21485	0.195103	0.003946	0.201263	0.434886	0.710339	1	0.001579	0.273875	0.513812	0.737964	0.995264	0.000789	0.325967	0.575375	0.796369	0.993686	0.416732	0.1397	0.443567	0.047393	0.082148	0.00158	0.000789	0.265193	0.51618	0.766377	1	0.32281	0.468035	0.604578	0.895817	0.993686	0.003157	0.187845	0.410418	0.722968	0.973954	0.453039	0.322275	0.003157	0.384373	0.588792	0.793212	0.993686	0.343331
0.278351	0.378007	0.343643	0.224138	0.182759	0.244828	0.006873	0.250859	0.487973	0.766323	0.993127	0.017182	0.223368	0.477663	0.731959	0.996564	0.003436	0.257732	0.525773	0.745704	1	0.398625	0.168385	0.43299	0.048276	0.096552	0	0.003436	0.182131	0.429553	0.701031	1	0.202749	0.357388	0.443299	0.635739	0.725086	0.054983	0.257732	0.536082	0.821306	0.986254	0.532646	0.406897	0.041237	0.278351	0.484536	0.683849	0.982818	0.381443
0.375	0.267857	0.357143	0.16129	0.265233	0.261649	0.007143	0.192857	0.428571	0.703571	1	0.032143	0.282143	0.546429	0.764286	0.996429	0.003571	0.275	0.510714	0.75	0.992857	0.271429	0.096429	0.632143	0.032258	0.082437	0.003584	0.003571	0.139286	0.510714	0.775	1	0.010714	0.039286	0.078571	0.107143	0.175	0.142857	0.357143	0.564286	0.767857	0.985714	0.517857	0.394265	0.010714	0.271429	0.510714	0.739286	0.975	0.271429
0.411205	0.479915	0.108879	0.299471	0.100529	0.078307	0.002114	0.204017	0.464059	0.729387	0.998943	0.003171	0.352008	0.57611	0.764271	1	0.001057	0.071882	0.149049	0.654334	0.995772	0.88055	0.01797	0.10148	0.008466	0.02328	0	0.001057	0.312896	0.538055	0.757928	1	0.088795	0.091966	0.504228	0.818182	0.831924	0.020085	0.056025	0.106765	0.137421	0.984144	0.086681	0.10582	0.004228	0.05814	0.096195	0.480973	0.990486	0.48203
0.376645	0.320724	0.302632	0.230643	0.248764	0.181219	0.004934	0.225329	0.427632	0.725329	1	0.003289	0.305921	0.527961	0.753289	0.995066	0.001645	0.220395	0.557566	0.758224	0.996711	0.462171	0.131579	0.40625	0.051071	0.103789	0.001647	0.001645	0.335526	0.5625	0.805921	1	0.164474	0.268092	0.675987	0.810855	0.929276	0.006579	0.144737	0.361842	0.618421	0.991776	0.434211	0.401977	0.011513	0.291118	0.590461	0.782895	0.996711	0.383224
0.321168	0.364964	0.313869	0.241463	0.202439	0.253659	0.014599	0.238443	0.474453	0.749392	0.997567	0.004866	0.226277	0.513382	0.751825	1	0.002433	0.274939	0.493917	0.729927	0.995134	0.442822	0.36983	0.187348	0.097561	0.058537	0.019512	0.002433	0.265207	0.527981	0.778589	1	0.075426	0.3382	0.554745	0.742092	0.985401	0.004866	0.167883	0.304136	0.625304	0.849148	0.462287	0.380488	0.009732	0.277372	0.515815	0.759124	0.995134	0.403893
0.438392	0.299611	0.261997	0.250649	0.218182	0.164935	0.003891	0.203632	0.478599	0.785992	1	0.002594	0.287938	0.474708	0.7393	0.994812	0.001297	0.354086	0.542153	0.721141	0.984436	0.523995	0.119326	0.35668	0.042857	0.066234	0.003896	0.001297	0.154345	0.289235	0.609598	1	0.029831	0.466926	0.601816	0.726329	0.907912	0.042802	0.453956	0.674449	0.856031	0.98703	0.404669	0.309091	0.014267	0.394293	0.538262	0.731518	0.985733	0.355383
0.431034	0.310345	0.258621	0.313043	0.234783	0.13913	0.017241	0.275862	0.508621	0.784483	1	0.043103	0.189655	0.465517	0.715517	0.991379	0.008621	0.267241	0.534483	0.663793	0.965517	0.456897	0.508621	0.034483	0.156522	0.017391	0	0.008621	0.206897	0.482759	0.715517	1	0.137931	0.293103	0.551724	0.758621	0.939655	0.060345	0.060345	0.068966	0.077586	0.086207	0.431034	0.330435	0.060345	0.267241	0.543103	0.663793	0.956897	0.318966
0.363333	0.325	0.311667	0.198664	0.237062	0.215359	0.005	0.233333	0.5	0.793333	1	0.013333	0.291667	0.51	0.771667	0.998333	0.001667	0.23	0.461667	0.675	0.996667	0.506667	0.143333	0.35	0.0601	0.106845	0.006678	0.001667	0.286667	0.53	0.775	1	0.048333	0.173333	0.578333	0.728333	0.945	0.006667	0.233333	0.393333	0.651667	0.996667	0.488333	0.404007	0.01	0.236667	0.515	0.725	0.995	0.326667
0.300373	0.419776	0.279851	0.214953	0.181308	0.246729	0.005597	0.20709	0.43097	0.76306	0.996269	0.009328	0.31903	0.576493	0.742537	1	0.001866	0.231343	0.466418	0.73694	0.981343	0.632463	0.160448	0.20709	0.059813	0.052336	0	0.001866	0.276119	0.567164	0.727612	1	0.016791	0.171642	0.335821	0.848881	0.981343	0.035448	0.218284	0.438433	0.779851	0.955224	0.626866	0.261682	0.009328	0.333955	0.552239	0.723881	0.981343	0.440299
0.359712	0.359712	0.280576	0.217391	0.173913	0.224638	0.021583	0.338129	0.546763	0.741007	0.971223	0.014388	0.194245	0.410072	0.784173	1	0.007194	0.23741	0.467626	0.697842	0.992806	0.47482	0.129496	0.395683	0.057971	0.072464	0	0.007194	0.208633	0.553957	0.863309	1	0.230216	0.251799	0.345324	0.618705	0.913669	0.057554	0.165468	0.496403	0.748201	0.848921	0.417266	0.362319	0.028777	0.258993	0.467626	0.640288	0.964029	0.338129
0.272959	0.459184	0.267857	0.253197	0.15601	0.26087	0.017857	0.255102	0.492347	0.760204	0.989796	0.007653	0.247449	0.512755	0.742347	1	0.002551	0.232143	0.471939	0.737245	0.997449	0.354592	0.22449	0.420918	0.081841	0.071611	0	0.002551	0.267857	0.487245	0.803571	1	0.020408	0.19898	0.40051	0.540816	0.997449	0.058673	0.255102	0.586735	0.762755	0.979592	0.59949	0.434783	0.015306	0.280612	0.505102	0.737245	0.992347	0.52551
0.286371	0.502297	0.211332	0.216258	0.130368	0.187117	0.009188	0.165391	0.349158	0.575804	0.996937	0.003063	0.385911	0.601838	0.784074	1	0.001531	0.229709	0.41807	0.727412	0.993874	0.75804	0.056662	0.185299	0.027607	0.030675	0.003067	0.001531	0.304747	0.578867	0.784074	1	0.047473	0.211332	0.266462	0.316998	0.709035	0.070444	0.160796	0.333844	0.477795	0.911179	0.431853	0.328221	0.01072	0.267994	0.520674	0.686064	0.993874	0.513017
0.30303	0.381313	0.315657	0.23038	0.235443	0.217722	0.005051	0.239899	0.479798	0.795455	0.997475	0.007576	0.234848	0.472222	0.709596	1	0.002525	0.262626	0.527778	0.755051	0.994949	0.363636	0.214646	0.421717	0.075949	0.081013	0	0.002525	0.300505	0.512626	0.805556	1	0.012626	0.141414	0.381313	0.517677	0.878788	0.04798	0.252525	0.580808	0.772727	0.989899	0.608586	0.410127	0.007576	0.282828	0.5	0.734848	0.994949	0.378788
0.415042	0.231198	0.35376	0.165969	0.324965	0.182706	0.008357	0.236769	0.513928	0.756267	0.998607	0.005571	0.266017	0.504178	0.735376	0.994429	0.001393	0.231198	0.470752	0.739554	1	0.469359	0.224234	0.306407	0.093445	0.059972	0.004184	0.001393	0.204735	0.430362	0.707521	1	0.045961	0.192201	0.456825	0.845404	0.979109	0.006964	0.348189	0.575209	0.735376	0.997214	0.573816	0.407252	0.004178	0.253482	0.491643	0.746518	0.997214	0.256267
0.33123	0.353312	0.315457	0.259494	0.177215	0.246835	0.012618	0.271293	0.520505	0.772871	0.990536	0.006309	0.176656	0.44795	0.694006	0.996845	0.003155	0.287066	0.514196	0.744479	1	0.403785	0.22082	0.375394	0.063291	0.063291	0	0.003155	0.157729	0.40694	0.637224	1	0.059937	0.208202	0.425868	0.782334	0.949527	0.097792	0.369085	0.574132	0.829653	0.987382	0.542587	0.316456	0.056782	0.239748	0.492114	0.722397	0.993691	0.394322
0.398329	0.275766	0.325905	0.230126	0.249651	0.171548	0.002786	0.238162	0.498607	0.736769	0.995822	0.005571	0.246518	0.491643	0.745125	0.998607	0.001393	0.264624	0.511142	0.764624	1	0.451253	0.083565	0.465181	0.034868	0.079498	0.001395	0.001393	0.17688	0.423398	0.678273	1	0.006964	0.383008	0.604457	0.859331	0.915042	0.016713	0.303621	0.58078	0.763231	0.995822	0.456825	0.387727	0.005571	0.331476	0.529248	0.75766	0.993036	0.295265
0.354839	0.354839	0.290323	0.26087	0.206522	0.217391	0.043011	0.247312	0.430108	0.709677	1	0.021505	0.225806	0.526882	0.698925	0.956989	0.010753	0.129032	0.451613	0.731183	0.978495	0.451613	0.215054	0.333333	0.086957	0.108696	0	0.010753	0.236559	0.505376	0.677419	1	0.032258	0.075269	0.129032	0.55914	0.752688	0.193548	0.387097	0.473118	0.892473	0.978495	0.419355	0.413043	0.032258	0.11828	0.451613	0.709677	0.946237	0.397849
0.410909	0.250909	0.338182	0.222628	0.30292	0.164234	0.010909	0.250909	0.516364	0.796364	0.996364	0.014545	0.247273	0.505455	0.636364	0.992727	0.003636	0.218182	0.447273	0.734545	1	0.370909	0.174545	0.454545	0.051095	0.080292	0	0.003636	0.189091	0.425455	0.672727	1	0.12	0.283636	0.363636	0.567273	0.658182	0.021818	0.254545	0.698182	0.821818	0.985455	0.545455	0.408759	0.029091	0.232727	0.454545	0.654545	0.978182	0.261818
0.394209	0.242762	0.363029	0.165179	0.319196	0.133929	0.01559	0.233853	0.523385	0.752784	1	0.011136	0.249443	0.438753	0.76392	0.982183	0.002227	0.23608	0.483296	0.732739	0.997773	0.405345	0.2049	0.389755	0.075893	0.080357	0.004464	0.002227	0.300668	0.530067	0.792873	1	0.004454	0.262806	0.496659	0.777283	0.971047	0.013363	0.198218	0.432071	0.706013	0.995546	0.554566	0.410714	0.004454	0.273942	0.481069	0.717149	0.997773	0.253898
0.40717	0.348271	0.244558	0.269231	0.167949	0.174359	0.002561	0.201024	0.448143	0.727273	1	0.010243	0.266325	0.550576	0.763124	0.997439	0.00128	0.307298	0.548015	0.741357	0.99872	0.545455	0.12548	0.329065	0.042308	0.085897	0.003846	0.00128	0.158771	0.446863	0.792574	1	0.215109	0.444302	0.596671	0.704225	0.841229	0.003841	0.321383	0.498079	0.71959	0.994878	0.4379	0.305128	0.003841	0.317542	0.504481	0.705506	0.994878	0.389245
0.283228	0.476266	0.240506	0.242472	0.156894	0.206022	0.011076	0.193038	0.495253	0.727848	0.992089	0.003165	0.330696	0.525316	0.762658	1	0.001582	0.227848	0.447785	0.71519	0.988924	0.738924	0.053797	0.207278	0.034865	0.031696	0	0.001582	0.343354	0.528481	0.757911	1	0.026899	0.06962	0.099684	0.175633	0.563291	0.045886	0.231013	0.292722	0.935127	0.992089	0.664557	0.278922	0.025316	0.335443	0.599684	0.775316	0.988924	0.493671
0.362245	0.306122	0.331633	0.202046	0.263427	0.209719	0.010204	0.247449	0.528061	0.752551	0.994898	0.005102	0.229592	0.454082	0.714286	1	0.002551	0.267857	0.497449	0.755102	0.987245	0.387755	0.186224	0.42602	0.076726	0.081841	0	0.002551	0.280612	0.553571	0.77551	1	0.09949	0.262755	0.566327	0.798469	0.933673	0.007653	0.206633	0.466837	0.719388	0.987245	0.563776	0.393862	0.007653	0.27551	0.482143	0.729592	0.987245	0.27551
0.275641	0.474359	0.25	0.283871	0.141935	0.2	0.025641	0.166667	0.50641	0.75641	0.99359	0.019231	0.282051	0.532051	0.807692	1	0.00641	0.198718	0.435897	0.602564	0.846154	0.583333	0.108974	0.307692	0.032258	0.045161	0.006452	0.00641	0.230769	0.378205	0.852564	1	0.185897	0.205128	0.423077	0.448718	0.685897	0.076923	0.480769	0.557692	0.75641	0.833333	0.423077	0.322581	0.051282	0.365385	0.5	0.660256	0.903846	0.467949
0.369942	0.312139	0.317919	0.215116	0.255814	0.180233	0.011561	0.300578	0.50289	0.82659	1	0.040462	0.231214	0.543353	0.734104	0.99422	0.00578	0.202312	0.433526	0.66474	0.965318	0.34104	0.265896	0.393064	0.110465	0.063953	0.005814	0.00578	0.127168	0.491329	0.682081	1	0.011561	0.208092	0.526012	0.751445	0.83815	0.144509	0.306358	0.404624	0.861272	0.988439	0.358382	0.453488	0.017341	0.179191	0.479769	0.67052	0.965318	0.34104
0.363208	0.34434	0.292453	0.232227	0.255924	0.194313	0.014151	0.245283	0.462264	0.740566	1	0.009434	0.20283	0.533019	0.787736	0.990566	0.004717	0.259434	0.471698	0.698113	0.896226	0.415094	0.410377	0.174528	0.127962	0.052133	0.004739	0.004717	0.221698	0.551887	0.783019	1	0.028302	0.311321	0.471698	0.688679	0.896226	0.09434	0.226415	0.485849	0.665094	0.981132	0.40566	0.473934	0.033019	0.245283	0.448113	0.669811	0.90566	0.367925
0.350427	0.509972	0.139601	0.382857	0.074286	0.151429	0.011396	0.222222	0.410256	0.68661	0.997151	0.005698	0.259259	0.549858	0.760684	1	0.002849	0.239316	0.501425	0.717949	0.985755	0.940171	0.048433	0.011396	0.025714	0.002857	0.002857	0.002849	0.264957	0.509972	0.74359	1	0.019943	0.02849	0.14245	0.418803	0.97151	0.974359	0.974359	0.977208	0.980057	0.982906	0.216524	0.268571	0.014245	0.324786	0.521368	0.789174	0.985755	0.441595
0.329082	0.42602	0.244898	0.255754	0.153453	0.196931	0.010204	0.247449	0.408163	0.719388	0.969388	0.005102	0.331633	0.540816	0.790816	1	0.002551	0.196429	0.431122	0.709184	0.997449	0.553571	0.145408	0.30102	0.061381	0.066496	0.005115	0.002551	0.32398	0.538265	0.80102	1	0.081633	0.135204	0.454082	0.704082	0.84949	0.015306	0.221939	0.367347	0.729592	0.987245	0.471939	0.373402	0.012755	0.239796	0.5	0.790816	0.997449	0.469388
0.408163	0.251701	0.340136	0.239726	0.287671	0.157534	0.013605	0.285714	0.47619	0.707483	1	0.068027	0.176871	0.469388	0.721088	0.993197	0.006803	0.204082	0.517007	0.768707	0.972789	0.367347	0.29932	0.333333	0.109589	0.068493	0.013699	0.006803	0.14966	0.510204	0.741497	1	0.013605	0.244898	0.619048	0.891156	0.986395	0.061224	0.326531	0.408163	0.489796	0.816327	0.380952	0.452055	0.020408	0.204082	0.537415	0.727891	0.972789	0.278912
0.338677	0.478958	0.182365	0.261044	0.126506	0.160643	0.014028	0.250501	0.533066	0.767535	1	0.006012	0.298597	0.507014	0.751503	0.993988	0.002004	0.182365	0.388778	0.673347	0.985972	0.795591	0.06012	0.144289	0.024096	0.052209	0	0.002004	0.304609	0.503006	0.769539	1	0.136273	0.188377	0.222445	0.272545	0.663327	0.160321	0.250501	0.58517	0.733467	0.985972	0.478958	0.305221	0.016032	0.336673	0.462926	0.699399	0.98998	0.41483
0.402299	0.229885	0.367816	0.244186	0.360465	0.127907	0.034483	0.241379	0.425287	0.666667	0.977011	0.126437	0.264368	0.655172	0.770115	0.931034	0.011494	0.172414	0.494253	0.804598	1	0.45977	0.310345	0.229885	0.116279	0.046512	0	0.011494	0.241379	0.666667	0.804598	1	0.045977	0.275862	0.574713	0.712644	0.896552	0.137931	0.183908	0.390805	0.448276	0.505747	0.344828	0.395349	0.045977	0.16092	0.448276	0.597701	0.965517	0.218391
0.440771	0.316804	0.242424	0.279006	0.198895	0.179558	0.008264	0.294766	0.570248	0.763085	1	0.00551	0.206612	0.4573	0.757576	0.986226	0.002755	0.239669	0.446281	0.69697	0.975207	0.592287	0.143251	0.264463	0.060773	0.071823	0.005525	0.002755	0.206612	0.413223	0.757576	1	0.013774	0.231405	0.471074	0.586777	0.977961	0.024793	0.432507	0.628099	0.790634	0.969697	0.38292	0.364641	0.013774	0.250689	0.471074	0.699725	0.986226	0.369146
0.342488	0.386107	0.271405	0.257282	0.156958	0.229773	0.008078	0.169628	0.523425	0.780291	0.998384	0.003231	0.232633	0.450727	0.712439	1	0.001616	0.340872	0.536349	0.772213	0.983845	0.457189	0.138934	0.403877	0.045307	0.07767	0.006472	0.001616	0.122779	0.277868	0.642973	1	0.226171	0.439418	0.58643	0.754443	0.875606	0.017771	0.384491	0.621971	0.783522	0.993538	0.46042	0.326861	0.011309	0.337641	0.512116	0.739903	0.990307	0.42811
0.32526	0.404844	0.269896	0.253472	0.170139	0.21875	0.013841	0.245675	0.49827	0.799308	0.99308	0.00692	0.249135	0.515571	0.712803	0.99654	0.00346	0.231834	0.439446	0.723183	1	0.709343	0.155709	0.134948	0.090278	0.055556	0.006944	0.00346	0.33564	0.553633	0.740484	1	0.089965	0.217993	0.283737	0.854671	0.989619	0.017301	0.183391	0.311419	0.401384	0.979239	0.588235	0.319444	0.024221	0.342561	0.567474	0.726644	0.989619	0.370242
0.394444	0.298148	0.307407	0.250464	0.261596	0.165121	0.003704	0.233333	0.501852	0.737037	0.998148	0.009259	0.322222	0.572222	0.848148	0.987037	0.001852	0.212963	0.438889	0.644444	1	0.405556	0.207407	0.387037	0.064935	0.068646	0.001855	0.001852	0.314815	0.590741	0.881481	1	0.094444	0.27963	0.374074	0.52963	0.944444	0.012963	0.216667	0.507407	0.709259	0.848148	0.446296	0.378479	0.009259	0.27037	0.464815	0.644444	0.994444	0.346296
0.390805	0.329502	0.279693	0.2	0.257692	0.176923	0.019157	0.256705	0.521073	0.789272	1	0.007663	0.295019	0.544061	0.785441	0.965517	0.003831	0.206897	0.436782	0.643678	0.996169	0.452107	0.164751	0.383142	0.05	0.065385	0.011538	0.003831	0.344828	0.670498	0.816092	1	0.122605	0.172414	0.318008	0.643678	0.704981	0.015326	0.229885	0.394636	0.555556	0.992337	0.40613	0.4	0.02682	0.214559	0.436782	0.609195	0.969349	0.360153
0.275	0.454167	0.270833	0.217573	0.179916	0.217573	0.0125	0.158333	0.4125	0.675	1	0.008333	0.2875	0.566667	0.854167	0.991667	0.004167	0.2625	0.441667	0.6125	0.816667	0.441667	0.325	0.233333	0.117155	0.066946	0.008368	0.004167	0.304167	0.6125	0.779167	1	0.0125	0.183333	0.379167	0.5375	0.754167	0.066667	0.208333	0.658333	0.866667	0.925	0.4	0.426778	0.016667	0.241667	0.425	0.625	0.966667	0.454167
0.363095	0.342262	0.294643	0.223547	0.219076	0.202683	0.004464	0.186012	0.458333	0.684524	1	0.002976	0.260417	0.578869	0.81994	0.995536	0.001488	0.287202	0.491071	0.721726	0.998512	0.552083	0.150298	0.297619	0.067064	0.078987	0.00149	0.001488	0.159226	0.46875	0.767857	1	0.050595	0.229167	0.511905	0.723214	0.89881	0.098214	0.340774	0.561012	0.794643	0.997024	0.50744	0.435171	0.011905	0.270833	0.55506	0.772321	0.997024	0.375
0.325	0.357353	0.317647	0.247423	0.207658	0.244477	0.002941	0.255882	0.520588	0.761765	1	0.011765	0.214706	0.458824	0.736765	0.995588	0.001471	0.297059	0.504412	0.754412	0.998529	0.395588	0.180882	0.423529	0.088365	0.067747	0.005891	0.001471	0.270588	0.516176	0.798529	1	0.010294	0.189706	0.375	0.873529	0.997059	0.033824	0.289706	0.530882	0.676471	0.925	0.542647	0.388807	0.011765	0.270588	0.482353	0.716176	0.998529	0.391176
0.32153	0.40085	0.27762	0.239716	0.191489	0.204255	0.002833	0.276204	0.525496	0.774788	0.997167	0.004249	0.216714	0.432011	0.720963	1	0.001416	0.273371	0.542493	0.752125	0.990085	0.562323	0.101983	0.335694	0.036879	0.087943	0.002837	0.001416	0.314448	0.502833	0.800283	1	0.157224	0.345609	0.750708	0.827195	0.917847	0.016997	0.194051	0.466006	0.651558	0.947592	0.477337	0.371631	0.016997	0.280453	0.5	0.752125	0.990085	0.439093
0.358044	0.381703	0.260252	0.254344	0.192733	0.210111	0.012618	0.250789	0.44164	0.746057	1	0.003155	0.288644	0.570978	0.757098	0.998423	0.001577	0.190852	0.455836	0.687697	0.992114	0.55205	0.167192	0.280757	0.066351	0.050553	0	0.001577	0.304416	0.621451	0.758675	1	0.004732	0.113565	0.253943	0.403785	0.569401	0.023659	0.272871	0.484227	0.913249	0.993691	0.539432	0.319115	0.003155	0.287066	0.597792	0.747634	0.988959	0.383281
0.289474	0.389474	0.321053	0.201058	0.201058	0.238095	0.010526	0.189474	0.384211	0.742105	0.994737	0.047368	0.326316	0.547368	0.757895	1	0.005263	0.242105	0.468421	0.673684	0.984211	0.463158	0.189474	0.347368	0.095238	0.084656	0	0.005263	0.336842	0.584211	0.852632	1	0.121053	0.184211	0.510526	0.715789	0.978947	0.021053	0.210526	0.357895	0.642105	0.831579	0.536842	0.359788	0.047368	0.226316	0.489474	0.657895	0.968421	0.442105
0.349057	0.292453	0.358491	0.208531	0.265403	0.175355	0.009434	0.259434	0.490566	0.698113	0.990566	0.075472	0.254717	0.419811	0.712264	1	0.004717	0.193396	0.599057	0.79717	0.995283	0.533019	0.150943	0.316038	0.075829	0.066351	0	0.004717	0.278302	0.410377	0.650943	1	0.018868	0.051887	0.599057	0.75	0.938679	0.117925	0.216981	0.570755	0.806604	0.995283	0.514151	0.388626	0.014151	0.325472	0.533019	0.754717	0.995283	0.320755
0.40038	0.337761	0.26186	0.285171	0.224335	0.15019	0.005693	0.225806	0.426945	0.709677	0.996205	0.003795	0.210626	0.455408	0.732448	1	0.001898	0.42315	0.601518	0.802657	0.998102	0.563567	0.148008	0.288425	0.060837	0.04943	0.015209	0.001898	0.189753	0.347249	0.658444	1	0.055028	0.402277	0.667932	0.793169	0.973435	0.00759	0.442125	0.593928	0.806452	0.994307	0.436433	0.406844	0.013283	0.383302	0.574953	0.798861	0.99241	0.368121
0.468927	0.316384	0.214689	0.340909	0.221591	0.125	0.022599	0.242938	0.497175	0.768362	1	0.011299	0.225989	0.542373	0.779661	0.977401	0.00565	0.248588	0.440678	0.649718	0.920904	0.525424	0.124294	0.350282	0.034091	0.079545	0.011364	0.00565	0.180791	0.497175	0.762712	1	0.146893	0.220339	0.60452	0.887006	0.920904	0.101695	0.310734	0.463277	0.683616	0.971751	0.435028	0.386364	0.033898	0.248588	0.480226	0.717514	0.949153	0.389831
0.273141	0.494689	0.23217	0.226444	0.12614	0.215805	0.030349	0.209408	0.488619	0.707132	0.995448	0.003035	0.227618	0.479514	0.748103	1	0.001517	0.329287	0.52959	0.772382	0.996965	0.637329	0.098634	0.264036	0.042553	0.066869	0.00304	0.001517	0.283763	0.626707	0.792109	1	0.353566	0.421851	0.518968	0.925645	0.996965	0.007587	0.162367	0.29742	0.447648	0.989378	0.538695	0.319149	0.010622	0.330804	0.581184	0.763278	0.998483	0.517451
0.410959	0.214612	0.374429	0.178899	0.348624	0.169725	0.013699	0.255708	0.484018	0.707763	1	0.009132	0.136986	0.60274	0.849315	0.968037	0.004566	0.246575	0.488584	0.69863	0.990868	0.365297	0.228311	0.406393	0.073394	0.055046	0	0.004566	0.228311	0.392694	0.844749	1	0.045662	0.260274	0.515982	0.757991	0.995434	0.127854	0.223744	0.575342	0.680365	0.885845	0.557078	0.449541	0.022831	0.242009	0.534247	0.767123	0.990868	0.210046
0.372093	0.318937	0.30897	0.213333	0.25	0.206667	0.006645	0.245847	0.551495	0.813953	1	0.019934	0.242525	0.498339	0.700997	0.990033	0.003322	0.249169	0.458472	0.684385	0.996678	0.458472	0.162791	0.378738	0.046667	0.093333	0	0.003322	0.225914	0.581395	0.833887	1	0.13289	0.282392	0.365449	0.55814	0.644518	0.016611	0.242525	0.468439	0.740864	0.960133	0.495017	0.38	0.0299	0.222591	0.438538	0.624585	0.986711	0.335548
0.344985	0.369301	0.285714	0.270928	0.191781	0.191781	0.004559	0.232523	0.466565	0.740122	0.99696	0.007599	0.217325	0.515198	0.756839	0.99848	0.00152	0.288754	0.510638	0.727964	1	0.489362	0.133739	0.3769	0.039574	0.073059	0.009132	0.00152	0.158055	0.474164	0.787234	1	0.004559	0.303951	0.484802	0.600304	0.75228	0.010638	0.325228	0.566869	0.772036	0.908815	0.50304	0.374429	0.00304	0.276596	0.486322	0.712766	0.993921	0.395137
0.382139	0.419522	0.198339	0.267152	0.138254	0.155925	0.005192	0.283489	0.528557	0.797508	0.995846	0.003115	0.253375	0.505711	0.751817	1	0.001038	0.195223	0.413292	0.654206	0.966771	0.64486	0.095535	0.259605	0.053015	0.071726	0.003119	0.001038	0.233645	0.483904	0.779855	1	0.006231	0.264798	0.491173	0.732087	0.856698	0.016615	0.244029	0.509865	0.697819	0.993769	0.336449	0.293139	0.004154	0.141225	0.390447	0.63136	0.966771	0.439252
0.281421	0.442623	0.275956	0.221918	0.169863	0.271233	0.008197	0.234973	0.519126	0.70765	1	0.005464	0.215847	0.437158	0.740437	0.997268	0.002732	0.303279	0.540984	0.770492	0.989071	0.535519	0.155738	0.308743	0.049315	0.076712	0	0.002732	0.273224	0.407104	0.699454	1	0.128415	0.185792	0.527322	0.844262	0.920765	0.010929	0.248634	0.590164	0.808743	0.991803	0.387978	0.361644	0.038251	0.256831	0.622951	0.838798	0.991803	0.472678
0.329545	0.340909	0.329545	0.275862	0.241379	0.229885	0.113636	0.261364	0.602273	0.784091	1	0.034091	0.193182	0.397727	0.613636	0.988636	0.011364	0.170455	0.454545	0.715909	0.965909	0.340909	0.375	0.284091	0.137931	0.068966	0	0.011364	0.147727	0.363636	0.693182	1	0.022727	0.204545	0.318182	0.772727	0.897727	0.409091	0.465909	0.545455	0.613636	0.965909	0.613636	0.413793	0.022727	0.215909	0.431818	0.715909	0.965909	0.284091
0.394737	0.398496	0.206767	0.29434	0.166038	0.139623	0.022556	0.236842	0.541353	0.759398	0.988722	0.007519	0.191729	0.443609	0.729323	1	0.003759	0.274436	0.522556	0.669173	0.996241	0.511278	0.048872	0.43985	0.022642	0.083019	0	0.003759	0.146617	0.443609	0.845865	1	0.25188	0.259398	0.353383	0.364662	0.488722	0.033835	0.319549	0.605263	0.733083	0.992481	0.308271	0.316981	0.045113	0.334586	0.578947	0.706767	0.996241	0.394737
0.326531	0.397959	0.27551	0.216495	0.103093	0.298969	0.030612	0.214286	0.367347	0.887755	1	0.020408	0.377551	0.55102	0.765306	0.979592	0.010204	0.153061	0.408163	0.612245	0.826531	0.591837	0.214286	0.193878	0.103093	0.061856	0	0.010204	0.27551	0.683673	0.846939	1	0.306122	0.346939	0.510204	0.591837	0.816327	0.122449	0.153061	0.204082	0.428571	0.673469	0.510204	0.247423	0.05102	0.326531	0.469388	0.673469	0.816327	0.326531
0.369697	0.377778	0.252525	0.251012	0.198381	0.192308	0.00404	0.242424	0.547475	0.761616	0.99798	0.006061	0.193939	0.460606	0.747475	1	0.00202	0.29697	0.474747	0.731313	0.987879	0.517172	0.080808	0.40202	0.038462	0.082996	0.010121	0.00202	0.157576	0.432323	0.777778	1	0.076768	0.276768	0.39596	0.60202	0.672727	0.008081	0.361616	0.541414	0.765657	0.989899	0.448485	0.417004	0.014141	0.270707	0.466667	0.668687	0.987879	0.448485
0.362654	0.328704	0.308642	0.210201	0.22102	0.225657	0.00463	0.185185	0.496914	0.771605	1	0.003086	0.237654	0.481481	0.725309	0.986111	0.001543	0.285494	0.507716	0.757716	0.992284	0.442901	0.143519	0.41358	0.054096	0.081917	0.004637	0.001543	0.148148	0.408951	0.720679	1	0.057099	0.347222	0.513889	0.641975	0.760802	0.006173	0.316358	0.584877	0.82716	0.996914	0.540123	0.361669	0.007716	0.276235	0.481481	0.71142	0.992284	0.334877
0.293919	0.412162	0.293919	0.237288	0.166102	0.230508	0.010135	0.182432	0.5	0.780405	1	0.006757	0.243243	0.513514	0.72973	0.996622	0.003378	0.280405	0.476351	0.712838	0.97973	0.415541	0.162162	0.422297	0.047458	0.074576	0	0.003378	0.138514	0.425676	0.692568	1	0.226351	0.388514	0.456081	0.641892	0.726351	0.081081	0.283784	0.540541	0.831081	0.989865	0.533784	0.40678	0.013514	0.263514	0.489865	0.679054	0.983108	0.493243
0.297872	0.333333	0.368794	0.185714	0.228571	0.264286	0.021277	0.255319	0.531915	0.730496	0.985816	0.014184	0.212766	0.425532	0.751773	1	0.007092	0.262411	0.510638	0.744681	0.971631	0.283688	0	0.716312	0	0.128571	0	0.007092	0.198582	0.524823	0.730496	1	0	0	0	0	0	0.06383	0.262411	0.489362	0.765957	0.978723	0.539007	0.371429	0.070922	0.35461	0.560284	0.744681	0.971631	0.382979
0.341463	0.317073	0.341463	0.208889	0.244444	0.197778	0.004435	0.277162	0.485588	0.736142	0.995565	0.011086	0.266075	0.529933	0.762749	1	0.002217	0.210643	0.454545	0.738359	0.991131	0.392461	0.119734	0.487805	0.053333	0.084444	0	0.002217	0.379157	0.572062	0.773836	1	0.416851	0.583149	0.745011	0.91796	0.993348	0.013304	0.168514	0.332594	0.611973	0.906874	0.585366	0.337778	0.008869	0.235033	0.494457	0.700665	0.988914	0.345898
0.340839	0.458547	0.200614	0.260246	0.143443	0.17418	0.002047	0.25998	0.54043	0.734903	0.993859	0.003071	0.209826	0.463664	0.730809	0.997953	0.001024	0.322416	0.511771	0.823951	1	0.699079	0.138178	0.162743	0.052254	0.042008	0.009221	0.001024	0.203685	0.462641	0.692938	1	0.030706	0.243603	0.467758	0.86694	0.986694	0.016377	0.437052	0.711361	0.912999	0.998976	0.392016	0.286885	0.013306	0.288639	0.490276	0.811668	0.995906	0.489253
0.321918	0.424658	0.253425	0.282759	0.165517	0.255172	0.020548	0.191781	0.506849	0.753425	1	0.013699	0.267123	0.493151	0.746575	0.965753	0.006849	0.253425	0.417808	0.657534	0.945205	0.527397	0.287671	0.184932	0.096552	0.027586	0	0.006849	0.130137	0.452055	0.746575	1	0.150685	0.253425	0.349315	0.684932	0.883562	0.527397	0.561644	0.609589	0.767123	0.815068	0.445205	0.344828	0.034247	0.328767	0.520548	0.719178	0.945205	0.431507
0.213518	0.572965	0.213518	0.216923	0.103077	0.224615	0.010753	0.278034	0.460829	0.691244	0.990783	0.003072	0.204301	0.517665	0.752688	1	0.001536	0.310292	0.519201	0.803379	0.998464	0.726575	0.105991	0.167435	0.047692	0.032308	0.007692	0.001536	0.218126	0.579109	0.761905	1	0.225806	0.34255	0.44086	0.921659	0.996928	0.059908	0.248848	0.371736	0.511521	0.990783	0.572965	0.323077	0.00768	0.325653	0.56682	0.738863	0.998464	0.62212
0.377778	0.316667	0.305556	0.251397	0.27933	0.184358	0.016667	0.2	0.5	0.772222	1	0.027778	0.277778	0.455556	0.7	0.977778	0.005556	0.238889	0.516667	0.727778	0.988889	0.4	0.394444	0.205556	0.145251	0.03352	0	0.005556	0.222222	0.538889	0.866667	1	0.038889	0.177778	0.483333	0.672222	0.972222	0.338889	0.383333	0.433333	0.805556	0.861111	0.488889	0.469274	0.027778	0.372222	0.516667	0.716667	0.961111	0.327778
0.349359	0.416667	0.233974	0.292135	0.144462	0.224719	0.004808	0.248397	0.49359	0.703526	0.995192	0.003205	0.233974	0.509615	0.759615	0.996795	0.001603	0.258013	0.490385	0.764423	1	0.612179	0.116987	0.270833	0.048154	0.057785	0	0.001603	0.232372	0.496795	0.735577	1	0.041667	0.262821	0.418269	0.589744	0.940705	0.016026	0.302885	0.525641	0.793269	0.985577	0.392628	0.382022	0.014423	0.270833	0.554487	0.783654	0.99359	0.405449
0.272189	0.573964	0.153846	0.220238	0.113095	0.113095	0.017751	0.183432	0.343195	0.47929	0.934911	0.011834	0.497041	0.656805	0.816568	0.994083	0.005917	0.076923	0.218935	0.35503	1	0.650888	0.218935	0.130178	0.083333	0.02381	0	0.005917	0.431953	0.633136	0.822485	1	0.04142	0.207101	0.295858	0.455621	0.869822	0.112426	0.136095	0.171598	0.360947	0.39645	0.591716	0.321429	0.035503	0.313609	0.662722	0.822485	0.988166	0.579882
0.417476	0.38835	0.194175	0.343137	0.147059	0.156863	0.048544	0.203883	0.436893	0.699029	0.980583	0.019417	0.271845	0.485437	0.796117	1	0.009709	0.320388	0.582524	0.728155	0.941748	0.223301	0.009709	0.76699	0.019608	0.058824	0	0.009709	0.048544	0.106796	0.718447	1	0.737864	0.737864	0.737864	0.737864	0.737864	0.126214	0.300971	0.524272	0.786408	0.980583	0.262136	0.392157	0.126214	0.359223	0.572816	0.68932	0.951456	0.436893
0.355372	0.297521	0.347107	0.204969	0.267081	0.186335	0.018595	0.229339	0.541322	0.791322	0.997934	0.004132	0.204545	0.42562	0.702479	1	0.002066	0.289256	0.506198	0.741736	0.995868	0.450413	0.173554	0.376033	0.066253	0.086957	0.004141	0.002066	0.130165	0.402893	0.719008	1	0.008264	0.419421	0.621901	0.762397	0.927686	0.115702	0.316116	0.52686	0.739669	0.993802	0.528926	0.356108	0.004132	0.318182	0.514463	0.764463	0.995868	0.340909
0.428941	0.302326	0.268734	0.266839	0.256477	0.176166	0.005168	0.217054	0.457364	0.751938	0.994832	0.020672	0.299742	0.542636	0.77261	1	0.002584	0.224806	0.488372	0.726098	0.997416	0.364341	0.25323	0.382429	0.072539	0.072539	0.005181	0.002584	0.21447	0.403101	0.682171	1	0.142119	0.387597	0.503876	0.635659	0.899225	0.007752	0.22739	0.583979	0.873385	0.994832	0.475452	0.398964	0.01292	0.30491	0.534884	0.73385	0.989664	0.310078
0.27381	0.375	0.35119	0.209581	0.161677	0.251497	0.041667	0.214286	0.440476	0.64881	0.964286	0.011905	0.244048	0.5	0.821429	1	0.005952	0.267857	0.535714	0.72619	0.994048	0.35119	0.017857	0.630952	0.011976	0.083832	0.011976	0.005952	0.095238	0.339286	0.797619	1	0.077381	0.077381	0.077381	0.083333	0.720238	0.119048	0.303571	0.535714	0.744048	0.940476	0.52381	0.39521	0.02381	0.267857	0.535714	0.744048	0.994048	0.428571
0.338028	0.28169	0.380282	0.242857	0.257143	0.242857	0.042254	0.309859	0.605634	0.71831	1	0.028169	0.183099	0.394366	0.704225	0.929577	0.014085	0.197183	0.450704	0.774648	0.985915	0.43662	0.309859	0.253521	0.171429	0.057143	0.028571	0.014085	0.323944	0.591549	0.760563	1	0.056338	0.169014	0.633803	0.84507	0.985915	0.140845	0.211268	0.28169	0.422535	0.492958	0.380282	0.514286	0.070423	0.211268	0.394366	0.746479	0.985915	0.323944
0.341481	0.402222	0.256296	0.285397	0.180133	0.190511	0.001481	0.236296	0.484444	0.73037	0.997778	0.002963	0.258519	0.51037	0.757037	0.999259	0.000741	0.248148	0.503704	0.756296	1	0.5	0.134074	0.365926	0.13195	0.077094	0.001483	0.000741	0.234074	0.502222	0.760741	1	0.045185	0.288889	0.524444	0.752593	0.997778	0.001481	0.254815	0.485926	0.695556	0.977037	0.334074	0.530764	0.002963	0.242963	0.485926	0.747407	0.998519	0.39037
0.336066	0.344262	0.319672	0.231405	0.231405	0.214876	0.040984	0.180328	0.491803	0.696721	0.991803	0.032787	0.319672	0.57377	0.762295	0.97541	0.008197	0.188525	0.434426	0.721311	1	0.336066	0.221311	0.442623	0.082645	0.066116	0	0.008197	0.221311	0.467213	0.754098	1	0.245902	0.286885	0.368852	0.459016	0.852459	0.065574	0.163934	0.606557	0.713115	0.959016	0.459016	0.297521	0.02459	0.295082	0.467213	0.786885	0.983607	0.311475
0.355362	0.397756	0.246883	0.267166	0.168539	0.179775	0.013716	0.278055	0.586035	0.811721	1	0.002494	0.225686	0.498753	0.766833	0.993766	0.001247	0.23192	0.405237	0.620948	0.997506	0.490025	0.117207	0.392768	0.052434	0.082397	0.002497	0.001247	0.238155	0.567332	0.812968	1	0.125935	0.286783	0.413965	0.509975	0.845387	0.03616	0.256858	0.517456	0.682045	0.997506	0.4202	0.337079	0.004988	0.216958	0.395262	0.584788	0.976309	0.413965
0.386364	0.375	0.238636	0.275862	0.137931	0.218391	0.045455	0.215909	0.511364	0.738636	0.943182	0.022727	0.147727	0.443182	0.715909	1	0.011364	0.261364	0.431818	0.681818	0.988636	0.568182	0.045455	0.386364	0.045977	0.068966	0	0.011364	0.136364	0.318182	0.556818	1	0.284091	0.284091	0.295455	0.306818	0.5	0.352273	0.431818	0.704545	0.795455	0.965909	0.363636	0.436782	0.181818	0.375	0.602273	0.772727	0.988636	0.420455
0.409449	0.259843	0.330709	0.209486	0.300395	0.16996	0.007874	0.30315	0.480315	0.80315	1	0.019685	0.181102	0.523622	0.700787	0.952756	0.003937	0.244094	0.5	0.724409	0.988189	0.275591	0.279528	0.444882	0.071146	0.063241	0.007905	0.003937	0.133858	0.448819	0.728346	1	0.047244	0.122047	0.299213	0.807087	0.996063	0.169291	0.401575	0.531496	0.748031	0.96063	0.472441	0.474308	0.023622	0.244094	0.515748	0.744094	0.988189	0.26378
0.350195	0.422179	0.227626	0.306043	0.17154	0.177388	0.005837	0.254864	0.59144	0.77821	1	0.003891	0.266537	0.511673	0.805447	0.996109	0.001946	0.177043	0.385214	0.568093	0.98249	0.651751	0.054475	0.293774	0.017544	0.060429	0.009747	0.001946	0.235409	0.614786	0.815175	1	0.054475	0.085603	0.099222	0.552529	0.957198	0.013619	0.27821	0.472763	0.571984	0.984436	0.507782	0.2846	0.009728	0.200389	0.424125	0.579767	0.98249	0.431907
0.401961	0.294118	0.303922	0.237624	0.207921	0.178218	0.039216	0.27451	0.558824	0.735294	1	0.019608	0.22549	0.441176	0.794118	0.990196	0.009804	0.147059	0.45098	0.686275	0.892157	0.509804	0.196078	0.294118	0.089109	0.069307	0.009901	0.009804	0.215686	0.372549	0.647059	1	0.117647	0.284314	0.54902	0.686275	0.735294	0.029412	0.392157	0.470588	0.813725	0.892157	0.401961	0.356436	0.029412	0.176471	0.421569	0.686275	0.882353	0.27451
0.352113	0.347418	0.300469	0.264151	0.226415	0.216981	0.018779	0.253521	0.497653	0.737089	0.976526	0.00939	0.220657	0.478873	0.769953	0.995305	0.004695	0.2723	0.488263	0.723005	1	0.525822	0.230047	0.244131	0.056604	0.056604	0.009434	0.004695	0.140845	0.41784	0.680751	1	0.201878	0.314554	0.539906	0.737089	0.929577	0.122066	0.366197	0.624413	0.830986	0.953052	0.441315	0.339623	0.164319	0.361502	0.558685	0.723005	0.948357	0.384977
0.361905	0.257143	0.380952	0.153846	0.269231	0.144231	0.057143	0.180952	0.533333	0.780952	0.971429	0.019048	0.285714	0.485714	0.67619	1	0.009524	0.209524	0.47619	0.704762	0.990476	0.438095	0.561905	0	0.173077	0	0	0.009524	0.27619	0.533333	0.790476	1	0.019048	0.190476	0.409524	0.704762	0.980952	0	0	0	0	0	0.390476	0.519231	0.019048	0.209524	0.457143	0.704762	0.980952	0.257143
0.335	0.335	0.33	0.231156	0.226131	0.221106	0.01	0.215	0.465	0.735	1	0.055	0.255	0.415	0.67	0.94	0.005	0.24	0.595	0.805	0.995	0.55	0.11	0.34	0.060302	0.070352	0	0.005	0.245	0.385	0.68	1	0.03	0.4	0.7	0.81	0.91	0.055	0.17	0.54	0.775	0.97	0.475	0.371859	0.035	0.335	0.525	0.77	0.97	0.305
0.304029	0.364469	0.331502	0.231193	0.20367	0.234862	0.009158	0.20696	0.470696	0.741758	1	0.003663	0.254579	0.485348	0.747253	0.998168	0.001832	0.282051	0.512821	0.739927	0.992674	0.441392	0.161172	0.397436	0.06055	0.093578	0.005505	0.001832	0.217949	0.498168	0.771062	1	0.043956	0.382784	0.604396	0.778388	0.921245	0.010989	0.250916	0.456044	0.705128	0.974359	0.540293	0.344954	0.010989	0.296703	0.489011	0.739927	0.992674	0.391941
0.423913	0.336957	0.23913	0.351648	0.186813	0.175824	0.032609	0.195652	0.434783	0.728261	1	0.021739	0.173913	0.413043	0.695652	0.934783	0.01087	0.358696	0.521739	0.804348	0.978261	0.597826	0.032609	0.369565	0.043956	0.043956	0	0.01087	0.141304	0.293478	0.554348	1	0.380435	0.380435	0.380435	0.391304	0.586957	0.445652	0.521739	0.782609	0.869565	0.967391	0.358696	0.395604	0.130435	0.434783	0.597826	0.804348	0.934783	0.347826
0.394366	0.29108	0.314554	0.264151	0.287736	0.169811	0.00939	0.276995	0.549296	0.798122	1	0.014085	0.225352	0.431925	0.70892	0.981221	0.004695	0.253521	0.502347	0.704225	0.995305	0.492958	0.244131	0.262911	0.09434	0.066038	0	0.004695	0.220657	0.469484	0.694836	1	0.046948	0.201878	0.394366	0.652582	0.849765	0.103286	0.305164	0.596244	0.892019	0.957746	0.403756	0.349057	0.042254	0.239437	0.511737	0.704225	0.99061	0.295775
0.347162	0.381368	0.27147	0.248361	0.182083	0.207575	0.002183	0.269287	0.502911	0.75837	1	0.002911	0.161572	0.413392	0.713246	0.996361	0.000728	0.385735	0.565502	0.77802	0.998544	0.518923	0.077147	0.40393	0.032775	0.085215	0.003642	0.000728	0.135371	0.342795	0.614265	1	0.03639	0.417031	0.458515	0.611354	0.954876	0.026929	0.47671	0.666667	0.835517	0.998544	0.45706	0.355426	0.004367	0.377729	0.55968	0.756186	0.998544	0.372635
0.427123	0.328264	0.244613	0.269036	0.168782	0.170051	0.010139	0.188847	0.564005	0.81749	1	0.002535	0.237009	0.47782	0.716096	0.996198	0.001267	0.30545	0.453739	0.65019	0.988593	0.528517	0.105196	0.366286	0.040609	0.098985	0.005076	0.001267	0.157161	0.466413	0.813688	1	0.007605	0.343473	0.471483	0.590621	0.752852	0.021546	0.328264	0.543726	0.727503	0.975919	0.387833	0.294416	0.003802	0.304183	0.448669	0.619772	0.993663	0.380228
0.401408	0.352113	0.246479	0.340426	0.184397	0.177305	0.021127	0.267606	0.507042	0.753521	0.985915	0.014085	0.232394	0.478873	0.746479	1	0.007042	0.21831	0.443662	0.65493	0.838028	0.239437	0.34507	0.415493	0.035461	0.078014	0.021277	0.007042	0.070423	0.359155	0.535211	1	0.098592	0.577465	0.661972	0.760563	0.852113	0.042254	0.253521	0.422535	0.56338	0.985915	0.429577	0.411348	0.105634	0.253521	0.457746	0.661972	0.929577	0.352113
0.333333	0.343434	0.323232	0.265306	0.193878	0.204082	0.070707	0.323232	0.565657	0.727273	1	0.020202	0.181818	0.444444	0.737374	0.979798	0.010101	0.232323	0.474747	0.686869	0.969697	0.373737	0.222222	0.40404	0.122449	0.061224	0	0.010101	0.212121	0.535354	0.888889	1	0.191919	0.474747	0.747475	0.79798	0.949495	0.060606	0.151515	0.40404	0.616162	0.717172	0.444444	0.44898	0.040404	0.262626	0.494949	0.757576	0.969697	0.292929
0.384615	0.384615	0.230769	0.322222	0.188889	0.111111	0.032967	0.307692	0.494505	0.78022	0.978022	0.076923	0.197802	0.461538	0.736264	1	0.010989	0.098901	0.428571	0.681319	0.912088	0.461538	0.296703	0.241758	0.111111	0.066667	0	0.010989	0.296703	0.483516	0.736264	1	0.021978	0.076923	0.230769	0.406593	0.593407	0.615385	0.659341	0.791209	0.846154	0.945055	0.450549	0.333333	0.021978	0.21978	0.428571	0.648352	0.912088	0.351648
0.305753	0.37037	0.323877	0.235804	0.180599	0.240536	0.00394	0.251379	0.503546	0.762805	0.998424	0.001576	0.263987	0.492514	0.718676	0.994484	0.000788	0.233255	0.506698	0.768322	1	0.483846	0.431836	0.084318	0.136435	0.021293	0.003943	0.000788	0.245863	0.465721	0.711584	1	0.010244	0.222222	0.494878	0.739165	0.925138	0.002364	0.371946	0.929866	0.970843	0.998424	0.639874	0.301262	0.002364	0.256107	0.513002	0.745469	0.999212	0.399527
0.422509	0.315498	0.261993	0.297597	0.179298	0.190388	0.005535	0.191882	0.433579	0.739852	0.998155	0.00369	0.258303	0.49262	0.730627	0.99631	0.001845	0.359779	0.568266	0.761993	1	0.592251	0.226937	0.180812	0.103512	0.05915	0.003697	0.001845	0.201107	0.442804	0.774908	1	0.009225	0.383764	0.601476	0.763838	0.994465	0.04059	0.350554	0.501845	0.660517	0.98893	0.359779	0.32902	0.01107	0.400369	0.595941	0.782288	0.990775	0.376384
0.39599	0.397243	0.206767	0.331242	0.159348	0.16813	0.005013	0.256892	0.52381	0.799499	1	0.002506	0.276942	0.467419	0.734336	0.996241	0.001253	0.179198	0.484962	0.685464	0.997494	0.714286	0.070175	0.215539	0.035132	0.067754	0	0.001253	0.239348	0.457393	0.695489	1	0.070175	0.358396	0.754386	0.883459	0.938596	0.005013	0.186717	0.552632	0.834586	0.997494	0.327068	0.351317	0.003759	0.229323	0.541353	0.775689	0.997494	0.442356
0.308017	0.379747	0.312236	0.254237	0.152542	0.245763	0.008439	0.202532	0.510549	0.767932	0.995781	0.050633	0.291139	0.506329	0.763713	0.987342	0.004219	0.232068	0.42616	0.662447	1	0.341772	0.092827	0.565401	0.042373	0.110169	0	0.004219	0.156118	0.438819	0.78481	1	0.43038	0.763713	0.818565	0.839662	0.987342	0.021097	0.253165	0.455696	0.611814	0.957806	0.493671	0.338983	0.029536	0.236287	0.438819	0.675105	0.991561	0.371308
0.330144	0.330144	0.339713	0.232614	0.247002	0.230216	0.014354	0.244019	0.483254	0.739234	0.997608	0.004785	0.241627	0.511962	0.755981	1	0.002392	0.258373	0.504785	0.712919	0.992823	0.394737	0.148325	0.456938	0.06235	0.091127	0.004796	0.002392	0.222488	0.538278	0.80622	1	0.08134	0.282297	0.516746	0.906699	0.961722	0.009569	0.244019	0.421053	0.669856	0.866029	0.569378	0.364508	0.009569	0.239234	0.452153	0.698565	0.992823	0.349282
0.309091	0.4	0.290909	0.22561	0.213415	0.231707	0.024242	0.224242	0.442424	0.739394	0.987879	0.012121	0.272727	0.539394	0.775758	1	0.006061	0.212121	0.436364	0.709091	0.957576	0.266667	0.157576	0.575758	0.054878	0.103659	0.006098	0.006061	0.2	0.466667	0.70303	1	0.151515	0.309091	0.490909	0.648485	0.709091	0.030303	0.242424	0.551515	0.824242	0.987879	0.49697	0.47561	0.048485	0.30303	0.50303	0.715152	0.957576	0.418182
0.284615	0.415385	0.3	0.224806	0.224806	0.263566	0.030769	0.215385	0.430769	0.646154	0.969231	0.015385	0.269231	0.530769	0.792308	1	0.007692	0.2	0.523077	0.730769	0.992308	0.315385	0.492308	0.192308	0.093023	0.046512	0	0.007692	0.107692	0.323077	0.746154	1	0.061538	0.246154	0.461538	0.6	0.723077	0.3	0.776923	0.823077	0.869231	0.953846	0.469231	0.418605	0.038462	0.238462	0.530769	0.730769	0.946154	0.430769
0.367925	0.377358	0.254717	0.238095	0.180952	0.133333	0.04717	0.207547	0.537736	0.830189	0.933962	0.037736	0.264151	0.490566	0.707547	1	0.009434	0.113208	0.433962	0.632075	0.801887	0.509434	0.169811	0.320755	0.057143	0.057143	0	0.009434	0.330189	0.509434	0.849057	1	0.235849	0.264151	0.443396	0.537736	0.584906	0.04717	0.113208	0.613208	0.688679	0.896226	0.339623	0.304762	0.075472	0.245283	0.443396	0.603774	0.801887	0.396226
0.402571	0.329499	0.26793	0.232905	0.182126	0.181449	0.003383	0.274019	0.560893	0.81935	1	0.002706	0.284844	0.521651	0.759134	0.999323	0.000677	0.185386	0.384303	0.594723	0.983085	0.441137	0.02977	0.529093	0.010833	0.102911	0.005416	0.000677	0.34912	0.728687	0.854533	1	0.021651	0.093369	0.432341	0.520298	0.650203	0.003383	0.227334	0.402571	0.613667	0.99797	0.412043	0.291131	0.00203	0.186062	0.370771	0.564276	0.972936	0.343708
0.311248	0.436055	0.252696	0.226852	0.158951	0.231481	0.009245	0.249615	0.497689	0.742681	0.998459	0.003082	0.275809	0.530046	0.762712	1	0.001541	0.215716	0.454545	0.708783	0.989214	0.734977	0.104777	0.160247	0.046296	0.052469	0.003086	0.001541	0.300462	0.531587	0.745763	1	0.006163	0.228043	0.545455	0.864407	0.959938	0.01849	0.171032	0.337442	0.493066	0.924499	0.429892	0.330247	0.006163	0.223421	0.53775	0.781202	0.992296	0.428351
0.455882	0.25	0.294118	0.298507	0.238806	0.149254	0.029412	0.176471	0.455882	0.720588	0.985294	0.117647	0.235294	0.441176	0.602941	0.911765	0.014706	0.308824	0.485294	0.838235	1	0.558824	0.029412	0.411765	0.029851	0.059701	0	0.014706	0.132353	0.411765	0.573529	1	0.470588	0.470588	0.470588	0.470588	0.485294	0.279412	0.367647	0.676471	0.779412	0.882353	0.367647	0.447761	0.073529	0.323529	0.544118	0.764706	0.926471	0.264706
0.297872	0.421986	0.280142	0.225577	0.154529	0.273535	0.015957	0.255319	0.478723	0.822695	0.994681	0.003546	0.218085	0.5	0.675532	1	0.001773	0.278369	0.52305	0.776596	0.996454	0.601064	0.184397	0.214539	0.092362	0.053286	0	0.001773	0.281915	0.578014	0.730496	1	0.005319	0.242908	0.41844	0.835106	0.978723	0.033688	0.18617	0.384752	0.803191	0.985816	0.531915	0.273535	0.007092	0.27305	0.542553	0.723404	0.987589	0.434397
0.34375	0.320312	0.335938	0.267717	0.188976	0.251969	0.023438	0.242188	0.460938	0.757812	0.976562	0.015625	0.148438	0.445312	0.703125	0.953125	0.007812	0.273438	0.539062	0.773438	1	0.390625	0.140625	0.46875	0.07874	0.110236	0	0.007812	0.101562	0.476562	0.726562	1	0.273438	0.414062	0.625	0.789062	0.835938	0.03125	0.226562	0.5	0.867188	0.984375	0.523438	0.425197	0.046875	0.335938	0.53125	0.742188	0.984375	0.351562
0.393782	0.300518	0.305699	0.230104	0.212803	0.186851	0.003454	0.193437	0.490501	0.761658	0.996546	0.013817	0.222798	0.481865	0.770294	1	0.001727	0.319516	0.512953	0.713299	0.979275	0.468048	0.150259	0.381693	0.050173	0.077855	0.00519	0.001727	0.127807	0.352332	0.716753	1	0.005181	0.414508	0.590674	0.713299	0.841105	0.022453	0.340242	0.568221	0.804836	0.989637	0.502591	0.318339	0.005181	0.303972	0.492228	0.708117	0.991364	0.348877
0.375167	0.381842	0.242991	0.284759	0.168449	0.167112	0.00267	0.214953	0.453939	0.75968	1	0.004005	0.23231	0.503338	0.739653	0.995995	0.001335	0.335113	0.544726	0.735648	0.99733	0.568758	0.130841	0.300401	0.045455	0.072193	0.002674	0.001335	0.158879	0.41522	0.728972	1	0.238985	0.424566	0.611482	0.731642	0.837116	0.004005	0.359146	0.558077	0.774366	0.949266	0.425901	0.339572	0.004005	0.325768	0.522029	0.732977	0.99733	0.421896
0.330218	0.317757	0.352025	0.2	0.24375	0.203125	0.015576	0.224299	0.498442	0.750779	0.996885	0.018692	0.333333	0.548287	0.728972	1	0.003115	0.211838	0.464174	0.753894	0.990654	0.501558	0.267913	0.23053	0.10625	0.05625	0.00625	0.003115	0.246106	0.523364	0.772586	1	0.012461	0.274143	0.47352	0.672897	0.94704	0.037383	0.115265	0.495327	0.862928	0.993769	0.510903	0.38125	0.012461	0.327103	0.529595	0.747664	0.990654	0.271028
0.264516	0.44086	0.294624	0.226293	0.170259	0.232759	0.004301	0.189247	0.462366	0.707527	0.997849	0.006452	0.301075	0.554839	0.782796	1	0.002151	0.206452	0.423656	0.675269	0.995699	0.44086	0.189247	0.369892	0.068966	0.073276	0.00431	0.002151	0.286022	0.509677	0.767742	1	0.12043	0.266667	0.623656	0.756989	0.929032	0.025806	0.204301	0.430108	0.696774	0.989247	0.544086	0.396552	0.008602	0.27957	0.51828	0.733333	0.995699	0.44086
0.411043	0.251534	0.337423	0.160494	0.265432	0.185185	0.02454	0.276074	0.552147	0.846626	1	0.01227	0.202454	0.460123	0.668712	0.871166	0.006135	0.220859	0.435583	0.717791	0.98773	0.404908	0.294479	0.300613	0.080247	0.04321	0.018519	0.006135	0.122699	0.380368	0.533742	1	0.079755	0.208589	0.398773	0.711656	0.803681	0.159509	0.558282	0.638037	0.90184	0.981595	0.453988	0.296296	0.079755	0.251534	0.429448	0.687117	0.957055	0.233129
0.356269	0.351682	0.292049	0.222052	0.189893	0.212864	0.007645	0.321101	0.629969	0.847095	1	0.003058	0.212538	0.437309	0.678899	0.995413	0.001529	0.224771	0.443425	0.66208	0.996942	0.397554	0.134557	0.46789	0.052067	0.101072	0.006126	0.001529	0.215596	0.507645	0.764526	1	0.087156	0.255352	0.392966	0.544343	0.79052	0.025994	0.2737	0.551988	0.821101	0.990826	0.481651	0.367534	0.015291	0.203364	0.425076	0.616208	0.996942	0.368502
0.300885	0.40708	0.292035	0.214286	0.196429	0.205357	0.026549	0.19469	0.566372	0.831858	0.982301	0.017699	0.212389	0.389381	0.646018	1	0.00885	0.353982	0.548673	0.752212	0.99115	0.451327	0.212389	0.336283	0.089286	0.035714	0	0.00885	0.106195	0.300885	0.557522	1	0.132743	0.230088	0.371681	0.548673	0.628319	0.389381	0.681416	0.769912	0.849558	0.938053	0.362832	0.375	0.070796	0.274336	0.415929	0.610619	0.938053	0.415929
0.309904	0.421725	0.268371	0.282051	0.163462	0.269231	0.009585	0.255591	0.501597	0.734824	1	0.00639	0.249201	0.485623	0.741214	0.990415	0.003195	0.239617	0.520767	0.753994	0.98722	0.488818	0.162939	0.348243	0.048077	0.067308	0.003205	0.003195	0.188498	0.386581	0.683706	1	0.162939	0.230032	0.517572	0.821086	0.907348	0.073482	0.300319	0.58147	0.785942	0.990415	0.412141	0.378205	0.031949	0.313099	0.603834	0.824281	0.990415	0.412141
0.492537	0.268657	0.238806	0.287879	0.363636	0.075758	0.029851	0.253731	0.462687	0.731343	1	0.044776	0.179104	0.507463	0.61194	0.955224	0.014925	0.208955	0.41791	0.686567	0.895522	0.19403	0	0.80597	0	0.090909	0	0.014925	0.044776	0.567164	0.940299	1	0	0	0	0	0	0.059701	0.268657	0.477612	0.716418	0.925373	0.313433	0.454545	0.089552	0.313433	0.432836	0.641791	0.895522	0.283582
0.336449	0.351135	0.312417	0.217914	0.219251	0.223262	0.004005	0.312417	0.542056	0.815754	1	0.008011	0.202937	0.479306	0.70761	0.99733	0.001335	0.222964	0.46996	0.699599	0.998665	0.403204	0.261682	0.335113	0.076203	0.057487	0.009358	0.001335	0.221629	0.516689	0.781041	1	0.006676	0.158879	0.508678	0.783712	0.923899	0.029372	0.296395	0.405874	0.716956	0.99733	0.574099	0.36631	0.012016	0.208278	0.479306	0.676903	0.998665	0.376502
0.341818	0.298182	0.36	0.193078	0.271403	0.214936	0.003636	0.267273	0.512727	0.769091	1	0.012727	0.201818	0.445455	0.66	0.996364	0.001818	0.292727	0.529091	0.778182	0.992727	0.425455	0.085455	0.489091	0.041894	0.081967	0.001821	0.001818	0.256364	0.427273	0.650909	1	0.005455	0.214545	0.34	0.534545	0.612727	0.04	0.309091	0.643636	0.807273	0.996364	0.572727	0.404372	0.007273	0.232727	0.529091	0.730909	0.996364	0.336364
0.295302	0.422819	0.281879	0.277027	0.168919	0.256757	0.073826	0.422819	0.590604	0.738255	0.986577	0.020134	0.161074	0.409396	0.758389	1	0.006711	0.234899	0.442953	0.697987	0.959732	0.61745	0.288591	0.09396	0.060811	0.02027	0.006757	0.006711	0.214765	0.510067	0.771812	1	0.33557	0.395973	0.503356	0.691275	0.818792	0.040268	0.053691	0.080537	0.825503	0.852349	0.33557	0.472973	0.040268	0.268456	0.456376	0.684564	0.926174	0.422819
0.430446	0.301837	0.267717	0.234211	0.2	0.192105	0.018373	0.278215	0.593176	0.800525	1	0.005249	0.186352	0.469816	0.71916	0.976378	0.002625	0.265092	0.451444	0.627297	0.971129	0.430446	0.094488	0.475066	0.044737	0.102632	0.002632	0.002625	0.115486	0.39895	0.700787	1	0.086614	0.24147	0.372703	0.48294	0.687664	0.12336	0.354331	0.587927	0.800525	0.992126	0.362205	0.342105	0.089239	0.270341	0.427822	0.56168	0.971129	0.32021
0.371762	0.274611	0.353627	0.199741	0.300908	0.1738	0.007772	0.279793	0.541451	0.759067	0.998705	0.005181	0.220207	0.463731	0.705959	0.994819	0.001295	0.240933	0.492228	0.756477	1	0.467617	0.234456	0.297927	0.092088	0.058366	0.001297	0.001295	0.207254	0.431347	0.734456	1	0.042746	0.186528	0.436528	0.80829	0.967617	0.006477	0.331606	0.554404	0.713731	0.997409	0.572539	0.399481	0.003886	0.246114	0.487047	0.739637	0.996114	0.283679
0.465714	0.35	0.184286	0.267525	0.164521	0.127325	0.002857	0.212857	0.492857	0.775714	0.998571	0.004286	0.234286	0.401429	0.664286	0.994286	0.001429	0.458571	0.604286	0.772857	1	0.607143	0.1	0.292857	0.041488	0.038627	0.001431	0.001429	0.178571	0.335714	0.607143	1	0.134286	0.468571	0.53	0.601429	0.96	0.024286	0.561429	0.734286	0.807143	0.881429	0.438571	0.309013	0.021429	0.351429	0.54	0.771429	0.994286	0.372857
0.346961	0.331492	0.321547	0.221239	0.220133	0.210177	0.00221	0.275138	0.524862	0.78232	1	0.00663	0.232044	0.456354	0.717127	0.99558	0.001105	0.228729	0.496133	0.728177	0.981215	0.418785	0.128177	0.453039	0.054204	0.080752	0.001106	0.001105	0.245304	0.516022	0.770166	1	0.00221	0.342541	0.477348	0.643094	0.977901	0.014365	0.20663	0.509392	0.754696	0.994475	0.517127	0.391593	0.003315	0.257459	0.510497	0.708287	0.99337	0.358011
0.341463	0.341463	0.317073	0.273469	0.195918	0.208163	0.00813	0.215447	0.443089	0.756098	1	0.01626	0.308943	0.528455	0.760163	0.98374	0.004065	0.235772	0.49187	0.719512	0.995935	0.390244	0.012195	0.597561	0.004082	0.142857	0.012245	0.004065	0.378049	0.544715	0.739837	1	0.414634	0.414634	0.414634	0.418699	0.49187	0.012195	0.178862	0.434959	0.752033	0.99187	0.54878	0.408163	0.01626	0.252033	0.50813	0.703252	0.98374	0.353659
0.333913	0.422609	0.243478	0.25784	0.160279	0.210801	0.003478	0.24	0.45913	0.72	0.998261	0.02087	0.290435	0.516522	0.77913	1	0.001739	0.215652	0.493913	0.713043	0.982609	0.593043	0.102609	0.304348	0.04878	0.04878	0.003484	0.001739	0.351304	0.535652	0.787826	1	0.113043	0.584348	0.65913	0.758261	0.866087	0.008696	0.092174	0.215652	0.615652	0.996522	0.427826	0.379791	0.012174	0.226087	0.594783	0.782609	0.982609	0.426087
0.376721	0.352941	0.270338	0.243108	0.174185	0.197995	0.005006	0.176471	0.434293	0.71214	1	0.010013	0.28035	0.555695	0.773467	0.996245	0.001252	0.345432	0.530663	0.743429	0.998748	0.515645	0.117647	0.366708	0.04386	0.068922	0.006266	0.001252	0.188986	0.379224	0.692115	1	0.005006	0.390488	0.555695	0.710889	0.997497	0.015019	0.366708	0.624531	0.841051	0.992491	0.428035	0.333333	0.003755	0.360451	0.543179	0.763454	0.997497	0.387985
0.373239	0.366197	0.260563	0.276596	0.212766	0.120567	0.014085	0.267606	0.542254	0.760563	1	0.021127	0.28169	0.492958	0.866197	0.992958	0.007042	0.161972	0.338028	0.570423	0.746479	0.443662	0.197183	0.359155	0.070922	0.099291	0.014184	0.007042	0.309859	0.669014	0.859155	1	0.028169	0.070423	0.34507	0.43662	0.647887	0.112676	0.190141	0.528169	0.732394	0.943662	0.380282	0.340426	0.028169	0.161972	0.408451	0.556338	0.943662	0.246479
0.360902	0.323308	0.315789	0.272727	0.227273	0.174242	0.037594	0.285714	0.466165	0.706767	0.984962	0.015038	0.180451	0.526316	0.774436	1	0.007519	0.240602	0.481203	0.766917	0.992481	0.368421	0.345865	0.285714	0.143939	0.05303	0.007576	0.007519	0.338346	0.556391	0.721805	1	0.180451	0.383459	0.586466	0.81203	0.992481	0.030075	0.090226	0.24812	0.315789	0.917293	0.458647	0.439394	0.037594	0.240602	0.503759	0.789474	0.992481	0.338346
0.390805	0.356322	0.252874	0.267442	0.174419	0.209302	0.057471	0.183908	0.413793	0.563218	0.965517	0.022989	0.264368	0.574713	0.781609	1	0.011494	0.275862	0.586207	0.758621	0.988506	0.149425	0.011494	0.83908	0.023256	0.069767	0	0.011494	0.034483	0.494253	0.758621	1	0.770115	0.770115	0.770115	0.770115	0.770115	0.045977	0.241379	0.448276	0.689655	0.988506	0.287356	0.418605	0.08046	0.356322	0.574713	0.712644	0.954023	0.321839
0.385768	0.35206	0.262172	0.263158	0.210526	0.229323	0.007491	0.220974	0.434457	0.737828	0.996255	0.011236	0.333333	0.610487	0.812734	1	0.003745	0.179775	0.40824	0.64794	0.985019	0.303371	0.265918	0.430712	0.075188	0.067669	0.007519	0.003745	0.134831	0.531835	0.76779	1	0.044944	0.138577	0.28839	0.794007	0.985019	0.161049	0.385768	0.509363	0.726592	0.93633	0.464419	0.473684	0.022472	0.2397	0.505618	0.722846	0.985019	0.430712
0.336283	0.323009	0.340708	0.195556	0.24	0.217778	0.00885	0.221239	0.575221	0.840708	0.986726	0.022124	0.247788	0.486726	0.712389	1	0.004425	0.243363	0.460177	0.681416	0.995575	0.438053	0.225664	0.336283	0.093333	0.066667	0.013333	0.004425	0.181416	0.433628	0.668142	1	0.026549	0.115044	0.393805	0.597345	0.99115	0.154867	0.345133	0.623894	0.849558	0.986726	0.561947	0.328889	0.017699	0.292035	0.482301	0.668142	0.99115	0.371681
0.324042	0.412892	0.263066	0.26178	0.148342	0.230366	0.005226	0.290941	0.517422	0.745645	1	0.003484	0.249129	0.583624	0.799652	0.998258	0.001742	0.200348	0.372822	0.585366	0.994774	0.529617	0.148084	0.3223	0.052356	0.073298	0.006981	0.001742	0.336237	0.679443	0.8223	1	0.085366	0.278746	0.409408	0.574913	0.958188	0.019164	0.172474	0.355401	0.527875	0.994774	0.445993	0.279232	0.019164	0.19338	0.372822	0.578397	0.994774	0.439024
0.296748	0.52439	0.178862	0.310204	0.126531	0.155102	0.01626	0.321138	0.528455	0.756098	1	0.00813	0.191057	0.504065	0.764228	0.987805	0.004065	0.296748	0.443089	0.601626	0.995935	0.833333	0.146341	0.020325	0.061224	0.012245	0.004082	0.004065	0.207317	0.544715	0.780488	1	0.276423	0.333333	0.443089	0.5	0.926829	0.268293	0.268293	0.272358	0.609756	0.617886	0.654472	0.253061	0.00813	0.166667	0.386179	0.752033	0.995935	0.556911
0.340659	0.395604	0.263736	0.355556	0.144444	0.2	0.043956	0.186813	0.43956	0.725275	1	0.021978	0.197802	0.516484	0.714286	0.989011	0.010989	0.32967	0.56044	0.747253	0.967033	0.593407	0.373626	0.032967	0.155556	0.022222	0	0.010989	0.142857	0.362637	0.593407	1	0.252747	0.395604	0.659341	0.769231	0.912088	0.945055	0.945055	0.945055	0.956044	0.967033	0.395604	0.333333	0.098901	0.384615	0.516484	0.67033	0.912088	0.406593
0.367188	0.3125	0.320312	0.247059	0.239216	0.203922	0.015625	0.230469	0.5	0.695312	0.996094	0.007812	0.261719	0.546875	0.808594	1	0.003906	0.226562	0.472656	0.710938	0.992188	0.359375	0.121094	0.519531	0.058824	0.098039	0.003922	0.003906	0.136719	0.492188	0.753906	1	0.015625	0.152344	0.273438	0.644531	0.78125	0.027344	0.3125	0.527344	0.8125	0.992188	0.515625	0.376471	0.019531	0.222656	0.433594	0.71875	0.878906	0.320312
0.452941	0.344118	0.202941	0.300885	0.159292	0.129794	0.008824	0.188235	0.479412	0.732353	0.994118	0.005882	0.255882	0.5	0.8	0.991176	0.002941	0.367647	0.532353	0.714706	1	0.485294	0.041176	0.473529	0.023599	0.070796	0	0.002941	0.191176	0.311765	0.605882	1	0.367647	0.373529	0.45	0.532353	0.847059	0.011765	0.405882	0.661765	0.779412	0.997059	0.285294	0.306785	0.017647	0.373529	0.535294	0.670588	0.997059	0.414706
0.310606	0.431818	0.257576	0.274809	0.183206	0.19084	0.037879	0.257576	0.568182	0.727273	0.984848	0.015152	0.280303	0.522727	0.772727	1	0.007576	0.189394	0.340909	0.583333	0.962121	0.507576	0.492424	0	0.152672	0	0	0.007576	0.363636	0.636364	0.856061	1	0.037879	0.189394	0.356061	0.598485	0.969697	0	0	0	0	0	0.340909	0.381679	0.045455	0.204545	0.416667	0.606061	0.962121	0.431818
0.310959	0.394521	0.294521	0.163237	0.234568	0.266118	0.008219	0.19589	0.471233	0.753425	0.99863	0.00274	0.243836	0.49863	0.736986	1	0.00137	0.289041	0.515068	0.754795	0.994521	0.656164	0.1	0.243836	0.043896	0.082305	0	0.00137	0.242466	0.478082	0.689041	1	0.09863	0.161644	0.324658	0.9	0.994521	0.061644	0.347945	0.663014	0.794521	0.975342	0.673973	0.208505	0.015068	0.410959	0.583562	0.757534	0.991781	0.415068
0.330827	0.463659	0.205514	0.272271	0.150565	0.146801	0.003759	0.238095	0.449875	0.695489	1	0.002506	0.209273	0.482456	0.815789	0.998747	0.001253	0.390977	0.571429	0.724311	0.997494	0.661654	0.114035	0.224311	0.046424	0.048934	0.003764	0.001253	0.180451	0.360902	0.778195	1	0.005013	0.47619	0.617794	0.736842	0.830827	0.017544	0.446115	0.591479	0.726817	0.870927	0.52381	0.33877	0.005013	0.274436	0.536341	0.754386	0.997494	0.469925
0.356955	0.370079	0.272966	0.226316	0.2	0.181579	0.007874	0.314961	0.608924	0.834646	0.997375	0.005249	0.160105	0.430446	0.658793	1	0.002625	0.257218	0.493438	0.708661	0.955381	0.614173	0.175853	0.209974	0.065789	0.039474	0.002632	0.002625	0.223097	0.490814	0.779528	1	0.115486	0.204724	0.446194	0.690289	0.818898	0.073491	0.278215	0.564304	0.750656	0.989501	0.364829	0.342105	0.010499	0.259843	0.480315	0.711286	0.955381	0.391076
0.445545	0.237624	0.316832	0.22	0.3	0.12	0.019802	0.287129	0.49505	0.792079	0.990099	0.029703	0.19802	0.50495	0.752475	0.970297	0.009901	0.247525	0.455446	0.712871	1	0.405941	0.594059	0	0.2	0	0	0.009901	0.207921	0.50495	0.742574	1	0.029703	0.247525	0.445545	0.722772	0.990099	0	0	0	0	0	0.445545	0.32	0.049505	0.257426	0.455446	0.683168	0.930693	0.277228
0.432668	0.329177	0.238155	0.27965	0.217228	0.147316	0.003741	0.235661	0.485037	0.761845	0.998753	0.002494	0.274314	0.493766	0.729426	0.997506	0.001247	0.244389	0.514963	0.778055	1	0.451372	0.01995	0.528678	0.012484	0.077403	0	0.001247	0.253117	0.445137	0.605985	1	0.498753	0.502494	0.612219	0.765586	0.84414	0.016209	0.233167	0.637157	0.865337	0.997506	0.361596	0.401998	0.007481	0.279302	0.528678	0.784289	0.995012	0.342893
0.437016	0.322674	0.24031	0.262852	0.200776	0.152279	0.002907	0.16376	0.40407	0.741279	0.998062	0.001938	0.286822	0.534884	0.761628	0.997093	0.000969	0.372093	0.545543	0.732558	1	0.496124	0.125969	0.377907	0.050436	0.075655	0.00582	0.000969	0.176357	0.356589	0.69186	1	0.008721	0.460271	0.57655	0.695736	0.999031	0.061047	0.371124	0.58624	0.793605	0.987403	0.392442	0.325897	0.007752	0.407946	0.552326	0.718023	0.997093	0.360465
0.391555	0.301344	0.307102	0.230769	0.215385	0.198077	0.003839	0.337812	0.59309	0.823417	0.998081	0.011516	0.190019	0.433781	0.68714	1	0.001919	0.209213	0.426104	0.644914	0.990403	0.428023	0.143954	0.428023	0.046154	0.088462	0.007692	0.001919	0.241843	0.602687	0.873321	1	0.090211	0.289827	0.428023	0.587332	0.681382	0.017274	0.230326	0.466411	0.740883	0.988484	0.474088	0.319231	0.011516	0.1881	0.380038	0.600768	0.934741	0.347409
0.343186	0.35468	0.302135	0.228618	0.182566	0.213816	0.003284	0.293924	0.505747	0.758621	0.998358	0.006568	0.211823	0.490969	0.766831	1	0.001642	0.256158	0.495895	0.727422	0.981938	0.446634	0.134647	0.418719	0.049342	0.085526	0.006579	0.001642	0.238095	0.472906	0.719212	1	0.027915	0.229885	0.422003	0.661741	0.954023	0.050903	0.249589	0.536946	0.809524	0.986864	0.500821	0.345395	0.013136	0.226601	0.464696	0.701149	0.934319	0.357964
0.4	0.285714	0.314286	0.259615	0.221154	0.173077	0.028571	0.32381	0.552381	0.771429	0.990476	0.019048	0.266667	0.428571	0.752381	1	0.009524	0.180952	0.409524	0.695238	0.933333	0.361905	0.390476	0.247619	0.086538	0.009615	0.009615	0.009524	0.27619	0.466667	0.609524	1	0.038095	0.171429	0.266667	0.409524	0.704762	0.714286	0.761905	0.828571	0.885714	0.952381	0.390476	0.538462	0.057143	0.2	0.466667	0.72381	0.933333	0.257143
0.393939	0.328671	0.277389	0.268692	0.214953	0.221963	0.009324	0.291375	0.592075	0.801865	1	0.004662	0.184149	0.389277	0.636364	0.995338	0.002331	0.263403	0.501166	0.703963	0.97669	0.666667	0.086247	0.247086	0.10514	0.095794	0.016355	0.002331	0.25641	0.51049	0.752914	1	0.011655	0.18648	0.400932	0.699301	0.941725	0.027972	0.27972	0.4662	0.69697	0.969697	0.305361	0.504673	0.013986	0.270396	0.501166	0.724942	0.962704	0.324009
0.309859	0.380282	0.309859	0.2	0.257143	0.214286	0.028169	0.211268	0.535211	0.859155	0.985915	0.056338	0.267606	0.521127	0.661972	1	0.014085	0.169014	0.43662	0.591549	0.887324	0.549296	0.323944	0.126761	0.142857	0.028571	0	0.014085	0.126761	0.408451	0.661972	1	0.15493	0.211268	0.422535	0.605634	0.774648	0.830986	0.84507	0.873239	0.901408	0.943662	0.366197	0.428571	0.070423	0.225352	0.492958	0.605634	0.943662	0.394366
0.380328	0.498361	0.121311	0.273026	0.098684	0.095395	0.006557	0.180328	0.488525	0.744262	1	0.013115	0.27541	0.406557	0.737705	0.996721	0.003279	0.55082	0.629508	0.763934	0.927869	0.806557	0.095082	0.098361	0.039474	0.039474	0	0.003279	0.219672	0.422951	0.793443	1	0.045902	0.613115	0.67541	0.757377	0.783607	0.032787	0.491803	0.586885	0.704918	0.957377	0.186885	0.203947	0.009836	0.540984	0.636066	0.721311	0.957377	0.511475
0.323432	0.313531	0.363036	0.198675	0.264901	0.235099	0.009901	0.287129	0.570957	0.805281	0.993399	0.006601	0.240924	0.485149	0.752475	1	0.0033	0.191419	0.452145	0.653465	0.976898	0.478548	0.356436	0.165017	0.112583	0.05298	0.006623	0.0033	0.346535	0.646865	0.854785	1	0.013201	0.20462	0.379538	0.554455	0.980198	0.115512	0.155116	0.514851	0.729373	0.778878	0.50165	0.377483	0.013201	0.247525	0.448845	0.627063	0.983498	0.369637
0.307692	0.418269	0.274038	0.270531	0.130435	0.270531	0.028846	0.322115	0.543269	0.850962	1	0.009615	0.192308	0.418269	0.716346	0.990385	0.004808	0.240385	0.471154	0.682692	0.985577	0.514423	0.129808	0.355769	0.048309	0.10628	0	0.004808	0.173077	0.413462	0.860577	1	0.389423	0.427885	0.466346	0.668269	0.701923	0.019231	0.235577	0.596154	0.764423	0.956731	0.432692	0.347826	0.019231	0.399038	0.596154	0.735577	0.956731	0.403846
0.458993	0.316547	0.22446	0.244957	0.197406	0.161383	0.01295	0.351079	0.509353	0.776978	1	0.002878	0.230216	0.648921	0.808633	0.995683	0.001439	0.156835	0.332374	0.6	0.997122	0.447482	0.094964	0.457554	0.036023	0.056196	0.004323	0.001439	0.230216	0.72518	0.85036	1	0.004317	0.048921	0.146763	0.305036	0.789928	0.020144	0.374101	0.489209	0.602878	0.968345	0.261871	0.268012	0.005755	0.128058	0.277698	0.666187	0.905036	0.339568
0.390459	0.272085	0.337456	0.215929	0.270796	0.226549	0.0053	0.265018	0.510601	0.773852	1	0.003534	0.210247	0.484099	0.710247	0.992933	0.001767	0.256184	0.501767	0.734982	0.998233	0.397527	0.393993	0.208481	0.113274	0.046018	0.017699	0.001767	0.263251	0.558304	0.773852	1	0.040636	0.226148	0.496466	0.69258	0.925795	0.0053	0.174912	0.397527	0.779152	0.992933	0.44523	0.4	0.008834	0.240283	0.484099	0.722615	0.992933	0.305654
0.337025	0.356013	0.306962	0.240887	0.220285	0.202853	0.003165	0.251582	0.492089	0.724684	1	0.006329	0.21519	0.474684	0.78481	0.996835	0.001582	0.308544	0.518987	0.721519	0.985759	0.47943	0.045886	0.474684	0.019017	0.104596	0.009509	0.001582	0.126582	0.259494	0.612342	1	0.306962	0.503165	0.667722	0.963608	0.987342	0.006329	0.438291	0.620253	0.792722	0.949367	0.571203	0.393027	0.009494	0.264241	0.496835	0.716772	0.988924	0.387658
0.353646	0.328671	0.317682	0.238	0.229	0.198	0.008991	0.238761	0.481518	0.728272	1	0.001998	0.265734	0.511489	0.759241	0.995005	0.000999	0.234765	0.501499	0.737263	0.999001	0.458541	0.217782	0.323676	0.078	0.068	0.008	0.000999	0.257742	0.460539	0.696304	1	0.021978	0.317682	0.54046	0.751249	0.999001	0.007992	0.201798	0.585415	0.783217	0.989011	0.527473	0.36	0.002997	0.258741	0.548452	0.766234	0.998002	0.36963
0.394886	0.383523	0.221591	0.264957	0.196581	0.188034	0.008523	0.196023	0.482955	0.670455	0.988636	0.011364	0.269886	0.534091	0.8125	1	0.002841	0.241477	0.446023	0.732955	0.980114	0.789773	0.116477	0.09375	0.08547	0.051282	0.005698	0.002841	0.241477	0.525568	0.772727	1	0.03125	0.284091	0.653409	0.735795	0.920455	0.116477	0.247159	0.289773	0.502841	0.957386	0.238636	0.34188	0.03125	0.252841	0.420455	0.78125	0.980114	0.451705
0.353535	0.40404	0.242424	0.234694	0.193878	0.204082	0.050505	0.20202	0.383838	0.717172	0.959596	0.020202	0.242424	0.565657	0.686869	1	0.010101	0.353535	0.505051	0.818182	0.989899	0.474747	0.323232	0.20202	0.142857	0.040816	0	0.010101	0.292929	0.686869	0.878788	1	0.030303	0.242424	0.515152	0.646465	0.818182	0.111111	0.151515	0.333333	0.383838	0.434343	0.393939	0.387755	0.030303	0.222222	0.454545	0.767677	0.979798	0.383838
0.388889	0.333333	0.277778	0.280374	0.233645	0.224299	0.027778	0.305556	0.555556	0.768519	1	0.018519	0.222222	0.453704	0.657407	0.990741	0.009259	0.138889	0.398148	0.666667	0.962963	0.435185	0.564815	0	0.186916	0	0	0.009259	0.287037	0.518519	0.75	1	0.027778	0.231481	0.407407	0.666667	0.962963	0	0	0	0	0	0.398148	0.35514	0.037037	0.222222	0.537037	0.666667	0.962963	0.37037
0.330645	0.383065	0.28629	0.210526	0.202429	0.174089	0.028226	0.225806	0.471774	0.689516	0.955645	0.008065	0.254032	0.58871	0.879032	1	0.004032	0.233871	0.439516	0.608871	0.887097	0.53629	0.21371	0.25	0.048583	0.05668	0.016194	0.004032	0.193548	0.483871	0.862903	1	0.133065	0.225806	0.362903	0.604839	0.858871	0.104839	0.28629	0.520161	0.693548	0.806452	0.395161	0.331984	0.096774	0.28629	0.504032	0.645161	0.975806	0.423387
0.392321	0.305509	0.30217	0.250836	0.225753	0.190635	0.021703	0.228715	0.465776	0.737896	1	0.005008	0.230384	0.504174	0.786311	0.998331	0.001669	0.287145	0.517529	0.729549	0.996661	0.347245	0.038397	0.614357	0.018395	0.091973	0.005017	0.001669	0.328881	0.616027	0.891486	1	0.006678	0.016694	0.131886	0.434057	0.813022	0.026711	0.24374	0.492487	0.686144	0.994992	0.462437	0.367893	0.005008	0.235392	0.470785	0.702838	0.996661	0.307179
0.315305	0.402762	0.281933	0.240783	0.192396	0.248848	0.005754	0.243959	0.475259	0.713464	0.998849	0.002301	0.254315	0.508631	0.758343	1	0.001151	0.227848	0.517837	0.75374	0.997699	0.497123	0.228999	0.273878	0.102535	0.056452	0.003456	0.001151	0.216341	0.471807	0.741082	1	0.039125	0.180667	0.43153	0.812428	0.997699	0.006904	0.331415	0.542002	0.697353	0.991945	0.562716	0.40553	0.003452	0.247411	0.479862	0.733026	0.997699	0.432681
0.413043	0.25	0.336957	0.153846	0.296703	0.241758	0.021739	0.217391	0.434783	0.695652	1	0.076087	0.23913	0.456522	0.717391	0.956522	0.01087	0.184783	0.51087	0.804348	0.98913	0.445652	0.336957	0.217391	0.175824	0.043956	0	0.01087	0.315217	0.641304	0.771739	1	0.032609	0.23913	0.532609	0.793478	0.923913	0.119565	0.163043	0.358696	0.413043	0.467391	0.369565	0.395604	0.032609	0.184783	0.456522	0.771739	0.945652	0.228261
0.377301	0.325153	0.297546	0.230769	0.24	0.193846	0.006135	0.193252	0.466258	0.708589	1	0.039877	0.349693	0.576687	0.779141	0.996933	0.003067	0.236196	0.444785	0.693252	0.978528	0.53681	0.263804	0.199387	0.104615	0.055385	0.012308	0.003067	0.251534	0.466258	0.754601	1	0.042945	0.312883	0.555215	0.702454	0.935583	0.067485	0.138037	0.503067	0.846626	0.98773	0.503067	0.356923	0.042945	0.343558	0.527607	0.757669	0.978528	0.315951
0.36	0.36	0.28	0.28125	0.209821	0.196429	0.008889	0.248889	0.457778	0.751111	0.995556	0.044444	0.32	0.551111	0.742222	1	0.004444	0.173333	0.417778	0.72	0.951111	0.4	0.217778	0.382222	0.066964	0.058036	0.004464	0.004444	0.333333	0.671111	0.888889	1	0.137778	0.204444	0.373333	0.773333	0.866667	0.017778	0.106667	0.426667	0.524444	0.973333	0.462222	0.428571	0.026667	0.24	0.493333	0.68	0.862222	0.36
0.391003	0.290657	0.318339	0.211438	0.256499	0.162912	0.00692	0.299308	0.569204	0.83218	0.99654	0.00346	0.200692	0.50173	0.721453	0.986159	0.00173	0.214533	0.451557	0.688581	1	0.366782	0.141869	0.491349	0.051993	0.083189	0.003466	0.00173	0.238754	0.532872	0.780277	1	0.084775	0.237024	0.382353	0.543253	0.756055	0.022491	0.252595	0.525952	0.83737	0.99481	0.489619	0.34662	0.010381	0.202422	0.422145	0.610727	0.99308	0.32872
0.323232	0.40404	0.272727	0.258883	0.172589	0.228426	0.035354	0.328283	0.555556	0.772727	1	0.010101	0.151515	0.414141	0.651515	0.994949	0.005051	0.242424	0.575758	0.762626	0.979798	0.585859	0.20202	0.212121	0.071066	0.050761	0	0.005051	0.222222	0.434343	0.606061	1	0.080808	0.191919	0.671717	0.823232	0.89899	0.343434	0.388889	0.646465	0.757576	0.954545	0.373737	0.467005	0.025253	0.242424	0.565657	0.757576	0.979798	0.409091
0.320856	0.406417	0.272727	0.236559	0.193548	0.204301	0.010695	0.144385	0.427807	0.641711	0.994652	0.016043	0.358289	0.71123	0.84492	0.983957	0.005348	0.213904	0.406417	0.566845	1	0.540107	0.171123	0.28877	0.064516	0.053763	0.010753	0.005348	0.165775	0.673797	0.850267	1	0.144385	0.192513	0.347594	0.459893	0.786096	0.032086	0.454545	0.534759	0.604278	0.860963	0.433155	0.376344	0.026738	0.294118	0.465241	0.59893	0.97861	0.406417
0.333333	0.466361	0.200306	0.279959	0.141254	0.193269	0.001019	0.205912	0.453109	0.700306	0.998981	0.003058	0.258919	0.492864	0.770642	0.99949	0.00051	0.286952	0.587156	0.787971	1	0.842508	0.043323	0.114169	0.028047	0.033146	0.00051	0.00051	0.253313	0.477064	0.754842	1	0.044343	0.166157	0.286952	0.546891	0.941896	0.001529	0.506626	0.712538	0.746177	0.992355	0.480632	0.321265	0.002039	0.268094	0.533639	0.817533	0.998471	0.488787
0.376605	0.356633	0.266762	0.27	0.215714	0.174286	0.005706	0.268188	0.520685	0.761769	0.99572	0.002853	0.201141	0.445078	0.740371	1	0.001427	0.339515	0.536377	0.743224	0.998573	0.620542	0.135521	0.243937	0.065714	0.057143	0.005714	0.001427	0.225392	0.472183	0.733238	1	0.039943	0.373752	0.579173	0.825963	0.951498	0.054208	0.360913	0.529244	0.774608	0.998573	0.422254	0.402857	0.007133	0.266762	0.479315	0.699001	0.994294	0.39515
0.396226	0.313208	0.290566	0.25	0.280303	0.170455	0.011321	0.218868	0.520755	0.732075	0.996226	0.018868	0.332075	0.618868	0.811321	1	0.003774	0.215094	0.4	0.611321	0.992453	0.573585	0.113208	0.313208	0.083333	0.090909	0	0.003774	0.226415	0.460377	0.739623	1	0.05283	0.09434	0.264151	0.445283	0.992453	0.022642	0.407547	0.592453	0.8	0.916981	0.366038	0.484848	0.015094	0.237736	0.45283	0.70566	0.992453	0.339623
0.340467	0.330739	0.328794	0.206628	0.230019	0.216374	0.009728	0.233463	0.527237	0.741245	0.988327	0.003891	0.287938	0.480545	0.770428	1	0.001946	0.219844	0.474708	0.717899	0.994163	0.429961	0.18677	0.383268	0.072125	0.068226	0.005848	0.001946	0.27821	0.595331	0.784047	1	0.116732	0.268482	0.692607	0.848249	0.980545	0.009728	0.206226	0.414397	0.570039	0.957198	0.461089	0.440546	0.005837	0.264591	0.494163	0.712062	0.994163	0.33463
0.344538	0.367647	0.287815	0.242105	0.2	0.185263	0.004202	0.25	0.476891	0.743697	0.995798	0.008403	0.228992	0.491597	0.726891	1	0.002101	0.258403	0.537815	0.773109	0.968487	0.558824	0.197479	0.243697	0.067368	0.054737	0	0.002101	0.231092	0.497899	0.741597	1	0.056723	0.210084	0.409664	0.82563	0.968487	0.079832	0.359244	0.548319	0.75	0.995798	0.47479	0.353684	0.014706	0.310924	0.533613	0.756303	0.970588	0.380252
0.291005	0.407407	0.301587	0.251989	0.180371	0.246684	0.021164	0.261905	0.513228	0.730159	1	0.005291	0.195767	0.462963	0.756614	0.992063	0.002646	0.280423	0.521164	0.732804	0.997354	0.410053	0.156085	0.433862	0.066313	0.082228	0.007958	0.002646	0.190476	0.399471	0.777778	1	0.121693	0.283069	0.420635	0.558201	0.796296	0.005291	0.320106	0.600529	0.759259	0.994709	0.595238	0.366048	0.007937	0.301587	0.560847	0.759259	0.997354	0.412698
0.348238	0.407859	0.243902	0.255088	0.195387	0.170963	0.00813	0.239837	0.463415	0.701897	0.998645	0.00271	0.226287	0.440379	0.765583	0.99729	0.001355	0.314363	0.571816	0.768293	1	0.655827	0.150407	0.193767	0.067843	0.059701	0.005427	0.001355	0.222222	0.428184	0.677507	1	0.014905	0.318428	0.577236	0.754743	0.936314	0.02168	0.384824	0.558266	0.882114	0.993225	0.397019	0.415197	0.01355	0.342818	0.554201	0.772358	0.993225	0.399729
0.339515	0.378031	0.282454	0.25	0.207143	0.202857	0.012839	0.286733	0.510699	0.758916	0.99572	0.002853	0.18117	0.456491	0.724679	1	0.001427	0.300999	0.504993	0.74465	0.998573	0.60485	0.151213	0.243937	0.072857	0.064286	0.001429	0.001427	0.172611	0.413695	0.723252	1	0.108417	0.368046	0.550642	0.850214	0.950071	0.192582	0.356633	0.523538	0.78602	0.998573	0.467903	0.411429	0.008559	0.299572	0.526391	0.764622	0.994294	0.398003
0.438725	0.389706	0.171569	0.336609	0.159705	0.132678	0.014706	0.262255	0.477941	0.730392	0.985294	0.004902	0.237745	0.507353	0.79902	1	0.002451	0.215686	0.453431	0.72549	0.997549	0.735294	0.04902	0.215686	0.031941	0.081081	0.002457	0.002451	0.296569	0.492647	0.745098	1	0.5	0.678922	0.754902	0.794118	0.875	0.014706	0.093137	0.188725	0.720588	0.987745	0.340686	0.304668	0.012255	0.321078	0.5	0.752451	0.990196	0.428922
0.295345	0.382825	0.32183	0.211245	0.200803	0.235341	0.002408	0.271268	0.540931	0.761637	1	0.00321	0.213483	0.446228	0.716693	0.999197	0.000803	0.29053	0.520867	0.764045	0.997592	0.475923	0.108347	0.41573	0.04257	0.079518	0.004016	0.000803	0.158909	0.385233	0.684591	1	0.004815	0.307384	0.509631	0.697432	0.869984	0.024077	0.373997	0.616372	0.843499	0.998395	0.521669	0.380723	0.005618	0.284109	0.516854	0.748796	0.998395	0.403692
0.428571	0.209184	0.362245	0.184615	0.353846	0.14359	0.02551	0.209184	0.464286	0.765306	1	0.015306	0.30102	0.520408	0.719388	0.959184	0.005102	0.239796	0.484694	0.72449	0.994898	0.494898	0.142857	0.362245	0.082051	0.082051	0.020513	0.005102	0.163265	0.520408	0.72449	1	0.214286	0.25	0.586735	0.688776	0.964286	0.020408	0.341837	0.44898	0.755102	0.984694	0.44898	0.410256	0.030612	0.362245	0.510204	0.739796	0.984694	0.219388
0.335821	0.380597	0.283582	0.293233	0.18797	0.233083	0.037313	0.246269	0.455224	0.701493	0.985075	0.014925	0.223881	0.514925	0.723881	0.977612	0.007463	0.238806	0.5	0.768657	1	0.373134	0.350746	0.276119	0.172932	0.052632	0.007519	0.007463	0.328358	0.559701	0.723881	1	0.179104	0.380597	0.552239	0.813433	0.992537	0.037313	0.097015	0.246269	0.313433	0.91791	0.477612	0.406015	0.037313	0.246269	0.567164	0.791045	0.992537	0.373134
0.41573	0.404494	0.179775	0.340909	0.170455	0.113636	0.022472	0.179775	0.370787	0.696629	1	0.05618	0.337079	0.516854	0.752809	0.988764	0.011236	0.202247	0.561798	0.741573	0.966292	0.157303	0	0.842697	0	0.068182	0	0.011236	0.033708	0.719101	0.752809	1	0	0	0	0	0	0.044944	0.235955	0.449438	0.685393	0.966292	0.325843	0.409091	0.067416	0.382022	0.550562	0.741573	0.966292	0.370787
0.459902	0.418985	0.121113	0.340984	0.106557	0.108197	0.00982	0.304419	0.513912	0.734861	1	0.003273	0.230769	0.518822	0.780687	0.998363	0.001637	0.162029	0.263502	0.621931	0.978723	0.783961	0.06874	0.1473	0.027869	0.040984	0.001639	0.001637	0.296236	0.492635	0.779051	1	0.022913	0.198036	0.230769	0.584288	0.978723	0.00491	0.242226	0.623568	0.679214	0.968903	0.343699	0.288525	0.008183	0.168576	0.343699	0.494272	0.978723	0.500818
0.348765	0.354938	0.296296	0.225657	0.213292	0.208655	0.013889	0.268519	0.516975	0.794753	0.996914	0.003086	0.179012	0.447531	0.722222	1	0.001543	0.299383	0.537037	0.740741	0.998457	0.50463	0.166667	0.328704	0.068006	0.071097	0.006182	0.001543	0.16821	0.344136	0.649691	1	0.018519	0.353395	0.609568	0.760802	0.912037	0.050926	0.41821	0.583333	0.810185	0.976852	0.513889	0.374034	0.010802	0.32716	0.537037	0.746914	0.998457	0.376543
0.338742	0.35497	0.306288	0.227642	0.195122	0.215447	0.008114	0.269777	0.537525	0.770791	0.995943	0.010142	0.298174	0.525355	0.750507	0.997972	0.002028	0.156187	0.40568	0.713996	1	0.46856	0.125761	0.40568	0.050813	0.103659	0.006098	0.002028	0.25355	0.614604	0.8357	1	0.004057	0.085193	0.31643	0.490872	0.975659	0.05071	0.275862	0.496957	0.636917	0.914807	0.513185	0.406504	0.006085	0.206897	0.413793	0.616633	0.993915	0.389452
0.378788	0.363636	0.257576	0.384615	0.215385	0.138462	0.045455	0.19697	0.484848	0.666667	1	0.030303	0.272727	0.469697	0.681818	0.984848	0.015152	0.212121	0.378788	0.757576	0.939394	0.515152	0.212121	0.272727	0.076923	0.076923	0.015385	0.015152	0.272727	0.5	0.666667	1	0.19697	0.227273	0.348485	0.393939	0.772727	0.106061	0.151515	0.621212	0.848485	0.924242	0.318182	0.369231	0.136364	0.257576	0.378788	0.757576	0.939394	0.348485
0.291405	0.395528	0.313068	0.228671	0.18951	0.246853	0.004193	0.30608	0.520615	0.762404	0.995807	0.001398	0.238994	0.51153	0.735849	0.998602	0.000699	0.228512	0.454228	0.748428	1	0.538784	0.374563	0.086653	0.11958	0.031469	0.006294	0.000699	0.255066	0.508036	0.716981	1	0.019567	0.236198	0.469602	0.75891	0.937806	0.002795	0.17051	0.590496	0.960867	0.998602	0.591195	0.28951	0.002795	0.238994	0.482879	0.763103	0.997904	0.42348
0.36036	0.301802	0.337838	0.21267	0.271493	0.20362	0.027027	0.220721	0.481982	0.77027	1	0.009009	0.256757	0.423423	0.653153	0.986486	0.004505	0.22973	0.531532	0.747748	0.995495	0.346847	0.247748	0.405405	0.085973	0.085973	0.004525	0.004505	0.189189	0.391892	0.720721	1	0.130631	0.238739	0.5	0.752252	0.963964	0.018018	0.328829	0.518018	0.675676	0.990991	0.441441	0.479638	0.022523	0.297297	0.536036	0.756757	0.986486	0.310811
0.305668	0.502024	0.192308	0.273834	0.133874	0.188641	0.006073	0.261134	0.530364	0.730769	1	0.004049	0.248988	0.481781	0.740891	0.993927	0.002024	0.226721	0.51417	0.765182	0.997976	0.732794	0.058704	0.208502	0.032454	0.064909	0.008114	0.002024	0.202429	0.502024	0.757085	1	0.115385	0.483806	0.665992	0.807692	0.995951	0.109312	0.259109	0.319838	0.591093	0.965587	0.508097	0.267748	0.016194	0.291498	0.508097	0.805668	0.997976	0.45749
0.405882	0.317647	0.276471	0.289941	0.236686	0.171598	0.011765	0.294118	0.505882	0.776471	1	0.076471	0.235294	0.511765	0.705882	0.988235	0.005882	0.123529	0.441176	0.682353	0.911765	0.370588	0.282353	0.347059	0.118343	0.059172	0.011834	0.005882	0.135294	0.517647	0.735294	1	0.011765	0.217647	0.541176	0.770588	0.858824	0.147059	0.294118	0.382353	0.594118	0.976471	0.352941	0.43787	0.017647	0.182353	0.488235	0.682353	0.911765	0.376471
0.339286	0.428571	0.232143	0.254545	0.218182	0.236364	0.053571	0.214286	0.375	0.785714	0.982143	0.035714	0.160714	0.464286	0.714286	1	0.017857	0.339286	0.482143	0.660714	0.964286	0.714286	0.160714	0.125	0.109091	0.072727	0	0.017857	0.25	0.553571	0.767857	1	0.285714	0.303571	0.446429	0.482143	0.607143	0.089286	0.089286	0.125	0.875	0.910714	0.25	0.472727	0.267857	0.339286	0.517857	0.696429	0.964286	0.446429
0.406545	0.306156	0.287299	0.241398	0.241398	0.169811	0.003328	0.239046	0.507488	0.731559	0.999445	0.001109	0.289517	0.50416	0.745979	1	0.000555	0.207432	0.473655	0.770383	0.997227	0.569606	0.160843	0.269551	0.064373	0.056604	0.00444	0.000555	0.287854	0.523572	0.678314	1	0.010538	0.260677	0.445369	0.77482	0.995563	0.006656	0.143649	0.418747	0.833611	0.991681	0.468109	0.358491	0.002773	0.281198	0.494176	0.806988	0.996672	0.324459
0.32715	0.406408	0.266442	0.263514	0.163851	0.202703	0.003373	0.161889	0.467116	0.735245	1	0.006745	0.25801	0.526138	0.772344	0.998314	0.001686	0.317032	0.509275	0.715008	0.978078	0.50253	0.139966	0.357504	0.050676	0.077703	0.006757	0.001686	0.131535	0.376054	0.650927	1	0.183811	0.470489	0.630691	0.753794	0.887015	0.006745	0.350759	0.581788	0.789207	0.988196	0.505902	0.344595	0.006745	0.330523	0.51602	0.738617	0.966273	0.438449
0.379348	0.354348	0.266304	0.243743	0.21654	0.189336	0.002174	0.252174	0.508696	0.738043	1	0.005435	0.253261	0.505435	0.75	0.997826	0.001087	0.226087	0.468478	0.76087	0.998913	0.592391	0.169565	0.238043	0.071817	0.054407	0.002176	0.001087	0.259783	0.55	0.765217	1	0.021739	0.191304	0.565217	0.881522	0.973913	0.031522	0.219565	0.421739	0.640217	0.993478	0.431522	0.369967	0.003261	0.291304	0.544565	0.805435	0.998913	0.369565
0.26025	0.499109	0.240642	0.233929	0.125	0.241071	0.017825	0.253119	0.474153	0.782531	1	0.00713	0.272727	0.520499	0.71836	0.998217	0.001783	0.226381	0.465241	0.787879	0.994652	0.705882	0.135472	0.158645	0.060714	0.053571	0.003571	0.001783	0.301248	0.527629	0.734403	1	0.131907	0.279857	0.547237	0.809269	0.894831	0.051693	0.160428	0.286988	0.782531	0.973262	0.568627	0.346429	0.01426	0.276292	0.515152	0.766488	0.998217	0.486631
0.338983	0.39548	0.265537	0.289773	0.215909	0.244318	0.022599	0.248588	0.463277	0.757062	1	0.011299	0.242938	0.536723	0.745763	0.99435	0.00565	0.231638	0.474576	0.728814	0.988701	0.440678	0.220339	0.338983	0.102273	0.068182	0	0.00565	0.282486	0.553672	0.694915	1	0.101695	0.288136	0.423729	0.728814	0.99435	0.011299	0.214689	0.474576	0.853107	0.960452	0.525424	0.477273	0.022599	0.254237	0.497175	0.723164	0.988701	0.418079
0.404624	0.289017	0.306358	0.244186	0.255814	0.180233	0.011561	0.260116	0.433526	0.705202	0.988439	0.046243	0.231214	0.624277	0.803468	1	0.00578	0.179191	0.445087	0.67052	0.976879	0.369942	0.265896	0.364162	0.104651	0.05814	0.011628	0.00578	0.138728	0.508671	0.722543	1	0.011561	0.208092	0.526012	0.757225	0.843931	0.144509	0.294798	0.387283	0.606936	0.988439	0.364162	0.465116	0.017341	0.179191	0.456647	0.676301	0.976879	0.289017
0.325112	0.369955	0.304933	0.229213	0.211236	0.240449	0.011211	0.206278	0.419283	0.704036	0.997758	0.006726	0.295964	0.538117	0.784753	1	0.002242	0.230942	0.484305	0.737668	0.993274	0.381166	0.123318	0.495516	0.053933	0.094382	0	0.002242	0.394619	0.585202	0.782511	1	0.403587	0.571749	0.690583	0.85426	0.995516	0.008969	0.165919	0.320628	0.607623	0.896861	0.585202	0.319101	0.008969	0.226457	0.506726	0.706278	0.993274	0.396861
0.349112	0.352663	0.298225	0.218009	0.204976	0.218009	0.007101	0.23432	0.433136	0.71716	1	0.002367	0.228402	0.491124	0.759763	0.99645	0.001183	0.293491	0.553846	0.757396	0.997633	0.512426	0.102959	0.384615	0.0391	0.074645	0.003555	0.001183	0.247337	0.376331	0.624852	1	0.033136	0.576331	0.700592	0.785799	0.99645	0.00355	0.182249	0.586982	0.804734	0.984615	0.459172	0.381517	0.005917	0.336095	0.583432	0.782249	0.995266	0.391716
0.38069	0.364138	0.255172	0.243094	0.185083	0.189227	0.030345	0.284138	0.543448	0.771034	0.994483	0.002759	0.143448	0.415172	0.691034	1	0.001379	0.311724	0.53931	0.764138	0.997241	0.495172	0.092414	0.412414	0.044199	0.058011	0.002762	0.001379	0.147586	0.391724	0.662069	1	0.131034	0.313103	0.515862	0.842759	0.90069	0.044138	0.306207	0.630345	0.787586	0.986207	0.438621	0.403315	0.008276	0.315862	0.533793	0.743448	0.986207	0.361379
0.387665	0.299559	0.312775	0.212389	0.269912	0.19469	0.013216	0.22467	0.46696	0.726872	1	0.008811	0.290749	0.585903	0.770925	0.982379	0.004405	0.229075	0.462555	0.722467	0.973568	0.400881	0.22467	0.374449	0.070796	0.061947	0	0.004405	0.23348	0.502203	0.828194	1	0.044053	0.251101	0.343612	0.682819	0.911894	0.118943	0.207048	0.54185	0.634361	0.960352	0.515419	0.469027	0.022026	0.23348	0.497797	0.718062	0.933921	0.299559
0.358491	0.320755	0.320755	0.115385	0.288462	0.230769	0.056604	0.150943	0.54717	0.773585	1	0.037736	0.207547	0.396226	0.490566	0.90566	0.018868	0.320755	0.528302	0.735849	0.981132	0.566038	0.075472	0.358491	0.076923	0.076923	0	0.018868	0.132075	0.283019	0.471698	1	0.320755	0.320755	0.339623	0.358491	0.962264	0.490566	0.54717	0.679245	0.773585	0.867925	0.320755	0.346154	0.320755	0.509434	0.622642	0.735849	0.924528	0.320755
0.338235	0.448529	0.213235	0.237037	0.17037	0.118519	0.036765	0.25	0.470588	0.676471	1	0.044118	0.323529	0.654412	0.875	0.992647	0.007353	0.095588	0.294118	0.514706	0.691176	0.323529	0.161765	0.514706	0.059259	0.088889	0	0.007353	0.25	0.330882	0.463235	1	0.014706	0.205882	0.411765	0.477941	0.522059	0.051471	0.544118	0.676471	0.852941	0.992647	0.316176	0.281481	0.022059	0.176471	0.411765	0.588235	0.963235	0.477941
0.376147	0.278287	0.345566	0.180982	0.251534	0.187117	0.006116	0.229358	0.489297	0.761468	1	0.021407	0.308869	0.513761	0.715596	0.996942	0.003058	0.232416	0.470948	0.767584	0.993884	0.486239	0.262997	0.250765	0.101227	0.064417	0.009202	0.003058	0.229358	0.504587	0.75841	1	0.009174	0.269113	0.519878	0.703364	0.889908	0.024465	0.100917	0.470948	0.911315	0.993884	0.529052	0.374233	0.009174	0.299694	0.510703	0.733945	0.990826	0.266055
0.328467	0.364964	0.306569	0.338235	0.227941	0.191176	0.036496	0.226277	0.437956	0.70073	1	0.029197	0.218978	0.452555	0.722628	0.992701	0.007299	0.270073	0.540146	0.759124	0.970803	0.518248	0.226277	0.255474	0.102941	0.044118	0	0.007299	0.131387	0.452555	0.635036	1	0.065693	0.474453	0.686131	0.766423	0.985401	0.226277	0.328467	0.394161	0.839416	0.905109	0.489051	0.411765	0.065693	0.313869	0.489051	0.744526	0.970803	0.364964
0.485327	0.24605	0.268623	0.210407	0.223982	0.153846	0.004515	0.27991	0.474041	0.659142	0.997743	0.018059	0.227991	0.553047	0.812641	1	0.002257	0.187359	0.514673	0.808126	0.988713	0.638826	0.158014	0.20316	0.074661	0.061086	0.002262	0.002257	0.295711	0.476298	0.668172	1	0.013544	0.137698	0.512415	0.873589	0.977427	0.065463	0.17833	0.670429	0.767494	0.943567	0.525959	0.38009	0.011287	0.320542	0.512415	0.690745	0.975169	0.21219
0.384712	0.270677	0.344612	0.205772	0.292346	0.200753	0.007519	0.263158	0.501253	0.756892	1	0.005013	0.236842	0.483709	0.734336	0.994987	0.001253	0.240602	0.508772	0.746867	0.997494	0.463659	0.241855	0.294486	0.105395	0.055207	0.002509	0.001253	0.23183	0.483709	0.739348	1	0.038847	0.197995	0.41604	0.795739	0.997494	0.006266	0.319549	0.541353	0.703008	0.992481	0.570175	0.409034	0.003759	0.264411	0.47619	0.741855	0.997494	0.303258
0.346977	0.382326	0.270698	0.250466	0.17784	0.216015	0.00186	0.28093	0.538605	0.823256	0.996279	0.006512	0.185116	0.426977	0.72093	1	0.00093	0.300465	0.537674	0.705116	0.992558	0.619535	0.073488	0.306977	0.040037	0.062384	0.004655	0.00093	0.204651	0.421395	0.817674	1	0.021395	0.091163	0.274419	0.84186	0.996279	0.004651	0.490233	0.59814	0.707907	0.873488	0.555349	0.396648	0.006512	0.335814	0.541395	0.76	0.99814	0.382326
0.290934	0.384303	0.324763	0.210027	0.185637	0.242547	0.008119	0.286874	0.535859	0.742896	0.994587	0.002706	0.236806	0.499323	0.746955	0.997294	0.001353	0.219215	0.461434	0.753721	1	0.462788	0.253045	0.284168	0.097561	0.054201	0	0.001353	0.236806	0.50203	0.691475	1	0.005413	0.231394	0.564276	0.818674	0.97023	0.087957	0.296346	0.396482	0.7023	0.99594	0.543978	0.384824	0.006766	0.219215	0.44249	0.728011	0.99594	0.400541
0.405229	0.326797	0.267974	0.263158	0.223684	0.171053	0.013072	0.215686	0.503268	0.712418	0.986928	0.045752	0.20915	0.418301	0.784314	0.980392	0.006536	0.320261	0.529412	0.771242	1	0.653595	0.137255	0.20915	0.065789	0.052632	0.013158	0.006536	0.176471	0.339869	0.614379	1	0.117647	0.496732	0.777778	0.843137	0.993464	0.019608	0.529412	0.653595	0.908497	0.960784	0.392157	0.407895	0.019608	0.267974	0.424837	0.69281	0.980392	0.359477
0.37247	0.303644	0.323887	0.22027	0.240541	0.214865	0.004049	0.288799	0.54386	0.784076	1	0.005398	0.194332	0.450742	0.721997	0.995951	0.00135	0.245614	0.48583	0.735493	0.99865	0.411606	0.167341	0.421053	0.07973	0.078378	0.002703	0.00135	0.306343	0.489879	0.804318	0.99865	0.004049	0.17004	0.34278	0.900135	1	0.025641	0.268556	0.541161	0.678812	0.932524	0.51552	0.378378	0.005398	0.249663	0.466937	0.680162	0.99865	0.300945
0.38756	0.296651	0.315789	0.197115	0.235577	0.201923	0.014354	0.239234	0.449761	0.717703	0.995215	0.009569	0.167464	0.511962	0.77512	1	0.004785	0.311005	0.516746	0.746411	0.980861	0.45933	0.15311	0.38756	0.057692	0.067308	0.019231	0.004785	0.148325	0.521531	0.755981	1	0.210526	0.473684	0.607656	0.942584	0.980861	0.038278	0.30622	0.416268	0.712919	0.913876	0.492823	0.432692	0.019139	0.334928	0.502392	0.727273	0.980861	0.301435
0.332	0.368	0.3	0.228916	0.164659	0.232932	0.008	0.22	0.528	0.832	0.996	0.044	0.204	0.4	0.68	1	0.004	0.296	0.54	0.76	0.984	0.464	0.184	0.352	0.052209	0.052209	0.012048	0.004	0.144	0.356	0.624	1	0.18	0.24	0.308	0.564	0.856	0.012	0.472	0.684	0.9	0.988	0.544	0.337349	0.024	0.312	0.552	0.756	0.984	0.412
0.419355	0.236559	0.344086	0.163043	0.336957	0.152174	0.021505	0.204301	0.44086	0.677419	0.989247	0.107527	0.247312	0.569892	0.752688	1	0.010753	0.258065	0.462366	0.817204	0.967742	0.451613	0.333333	0.215054	0.173913	0.043478	0	0.010753	0.301075	0.677419	0.870968	1	0.032258	0.247312	0.537634	0.709677	0.924731	0.11828	0.16129	0.354839	0.408602	0.462366	0.387097	0.413043	0.032258	0.236559	0.462366	0.784946	0.956989	0.236559
0.455263	0.357895	0.186842	0.248021	0.131926	0.163588	0.026316	0.292105	0.536842	0.668421	0.994737	0.013158	0.223684	0.434211	0.739474	0.997368	0.002632	0.181579	0.647368	0.828947	1	0.634211	0.094737	0.271053	0.042216	0.068602	0.005277	0.002632	0.278947	0.471053	0.678947	1	0.007895	0.697368	0.784211	0.855263	0.965789	0.026316	0.089474	0.378947	0.728947	0.986842	0.278947	0.28496	0.010526	0.289474	0.689474	0.810526	0.992105	0.439474
0.368421	0.410526	0.221053	0.380952	0.164021	0.15873	0.015789	0.315789	0.610526	0.789474	1	0.010526	0.268421	0.510526	0.778947	0.984211	0.005263	0.157895	0.347368	0.515789	0.889474	0.347368	0.294737	0.357895	0.058201	0.089947	0.005291	0.005263	0.305263	0.721053	0.905263	1	0.021053	0.378947	0.463158	0.536842	0.9	0.068421	0.173684	0.273684	0.621053	0.942105	0.321053	0.359788	0.021053	0.178947	0.310526	0.478947	0.878947	0.431579
0.369863	0.332192	0.297945	0.250859	0.209622	0.216495	0.010274	0.222603	0.520548	0.760274	0.993151	0.006849	0.318493	0.486301	0.719178	0.996575	0.003425	0.215753	0.476027	0.732877	1	0.30137	0.089041	0.609589	0.030928	0.079038	0.003436	0.003425	0.178082	0.506849	0.770548	1	0.010274	0.027397	0.078767	0.106164	0.174658	0.143836	0.349315	0.547945	0.75	0.962329	0.506849	0.357388	0.013699	0.267123	0.493151	0.722603	0.952055	0.291096
0.243647	0.603886	0.152466	0.293413	0.086826	0.164671	0.00299	0.198804	0.412556	0.811659	0.998505	0.008969	0.349776	0.553064	0.747384	0.994021	0.001495	0.104634	0.237668	0.587444	1	0.68012	0.09417	0.22571	0.041916	0.062874	0.002994	0.001495	0.307922	0.512706	0.753363	1	0.00299	0.058296	0.158445	0.212257	0.967115	0.022422	0.189836	0.626308	0.886398	0.989537	0.608371	0.335329	0.004484	0.328849	0.526158	0.733931	0.994021	0.556054
0.270833	0.34375	0.385417	0.2	0.221053	0.284211	0.020833	0.166667	0.364583	0.614583	0.979167	0.041667	0.25	0.552083	0.71875	0.96875	0.010417	0.28125	0.5	0.802083	1	0.46875	0.322917	0.208333	0.147368	0.042105	0	0.010417	0.229167	0.614583	0.84375	1	0.041667	0.270833	0.552083	0.78125	0.90625	0.125	0.166667	0.354167	0.40625	0.458333	0.34375	0.378947	0.041667	0.1875	0.416667	0.5625	0.927083	0.260417
0.358621	0.468966	0.172414	0.347222	0.083333	0.166667	0.027586	0.296552	0.448276	0.668966	0.972414	0.013793	0.248276	0.510345	0.82069	0.986207	0.006897	0.227586	0.524138	0.772414	1	0.717241	0.131034	0.151724	0.048611	0.048611	0.006944	0.006897	0.268966	0.448276	0.8	1	0.068966	0.089655	0.234483	0.537931	0.855172	0.151724	0.558621	0.682759	0.717241	0.758621	0.289655	0.25	0.062069	0.241379	0.565517	0.834483	0.958621	0.462069
0.36646	0.291925	0.341615	0.199067	0.239502	0.244168	0.003106	0.248447	0.51087	0.729814	0.995342	0.004658	0.26087	0.490683	0.751553	1	0.001553	0.237578	0.495342	0.776398	0.998447	0.416149	0.231366	0.352484	0.088647	0.060653	0.007776	0.001553	0.23913	0.431677	0.703416	1	0.051242	0.190994	0.420807	0.902174	0.987578	0.003106	0.321429	0.621118	0.756211	0.993789	0.552795	0.382582	0.006211	0.273292	0.495342	0.753106	0.998447	0.296584
0.416321	0.35408	0.229599	0.288089	0.16482	0.160665	0.004149	0.300138	0.634855	0.807746	1	0.002766	0.271093	0.504841	0.767635	0.998617	0.001383	0.164592	0.334716	0.507607	0.917012	0.550484	0.230982	0.218534	0.087258	0.054017	0.006925	0.001383	0.305671	0.608575	0.771784	1	0.006916	0.142462	0.297372	0.475795	0.781466	0.062241	0.405256	0.626556	0.816044	0.97787	0.385892	0.33518	0.006916	0.193638	0.355463	0.539419	0.917012	0.39834
0.438053	0.345133	0.216814	0.306667	0.204444	0.164444	0.017699	0.247788	0.517699	0.79646	1	0.00885	0.20354	0.49115	0.734513	0.982301	0.004425	0.300885	0.464602	0.676991	0.986726	0.672566	0.123894	0.20354	0.035556	0.062222	0	0.004425	0.20354	0.455752	0.778761	1	0.345133	0.464602	0.495575	0.663717	0.69469	0.017699	0.402655	0.575221	0.743363	0.986726	0.314159	0.328889	0.022124	0.362832	0.522124	0.668142	0.986726	0.384956
0.434211	0.25	0.315789	0.205298	0.304636	0.165563	0.013158	0.276316	0.460526	0.684211	1	0.085526	0.256579	0.552632	0.769737	0.986842	0.006579	0.164474	0.539474	0.796053	0.993421	0.355263	0.315789	0.328947	0.13245	0.05298	0.013245	0.006579	0.144737	0.552632	0.763158	1	0.013158	0.243421	0.605263	0.868421	0.967105	0.059211	0.309211	0.394737	0.473684	0.802632	0.375	0.450331	0.019737	0.197368	0.506579	0.723684	0.953947	0.263158
0.391304	0.452899	0.155797	0.345455	0.138182	0.112727	0.014493	0.300725	0.532609	0.771739	1	0.025362	0.228261	0.518116	0.710145	0.996377	0.003623	0.130435	0.333333	0.706522	0.923913	0.717391	0.050725	0.231884	0.021818	0.058182	0	0.003623	0.246377	0.48913	0.666667	1	0.032609	0.039855	0.108696	0.315217	0.32971	0.130435	0.365942	0.728261	0.844203	0.92029	0.23913	0.370909	0.01087	0.221014	0.525362	0.778986	0.985507	0.463768
0.398649	0.297297	0.304054	0.244898	0.238095	0.14966	0.013514	0.22973	0.418919	0.716216	1	0.02027	0.297297	0.533784	0.844595	0.993243	0.006757	0.222973	0.5	0.702703	0.97973	0.25	0	0.75	0	0.108844	0	0.006757	0.263514	0.527027	0.797297	1	0	0	0	0	0	0.013514	0.216216	0.452703	0.716216	0.945946	0.513514	0.394558	0.027027	0.297297	0.52027	0.695946	0.905405	0.290541
0.356877	0.27881	0.364312	0.179104	0.253731	0.19403	0.01487	0.219331	0.449814	0.743494	0.992565	0.05948	0.263941	0.513011	0.750929	0.988848	0.003717	0.241636	0.509294	0.728625	1	0.35316	0.182156	0.464684	0.052239	0.097015	0	0.003717	0.167286	0.416357	0.695167	1	0.171004	0.330855	0.431227	0.635688	0.732342	0.01487	0.237918	0.524164	0.825279	0.996283	0.550186	0.425373	0.011152	0.256506	0.472119	0.680297	0.98513	0.282528
0.388383	0.369021	0.242597	0.287343	0.191562	0.173318	0.004556	0.323462	0.595672	0.816629	0.998861	0.002278	0.224374	0.473804	0.722096	0.994305	0.001139	0.214123	0.411162	0.646925	1	0.501139	0.120729	0.378132	0.051311	0.085519	0.003421	0.001139	0.214123	0.550114	0.790433	1	0.045558	0.258542	0.41344	0.657175	0.867882	0.059226	0.266515	0.472665	0.675399	0.98861	0.403189	0.330673	0.004556	0.222096	0.414579	0.6082	0.980638	0.405467
0.401015	0.284264	0.314721	0.214286	0.25	0.173469	0.015228	0.253807	0.527919	0.761421	1	0.010152	0.208122	0.446701	0.715736	0.994924	0.005076	0.243655	0.502538	0.741117	0.984772	0.467005	0.187817	0.345178	0.066327	0.066327	0.02551	0.005076	0.152284	0.522843	0.766497	1	0.071066	0.274112	0.614213	0.939086	0.989848	0.040609	0.324873	0.426396	0.720812	0.918782	0.502538	0.408163	0.020305	0.329949	0.502538	0.746193	0.984772	0.279188
0.34433	0.352577	0.303093	0.208462	0.186791	0.21259	0.003093	0.201031	0.406186	0.689691	1	0.002062	0.282474	0.560825	0.8	0.998969	0.001031	0.286598	0.534021	0.742268	0.995876	0.454639	0.110309	0.435052	0.047472	0.078431	0.002064	0.001031	0.274227	0.593814	0.856701	1	0.006186	0.378351	0.679381	0.802062	0.968041	0.021649	0.181443	0.434021	0.584536	0.992784	0.501031	0.373581	0.008247	0.353608	0.571134	0.775258	0.98866	0.372165
0.328502	0.400966	0.270531	0.256659	0.159806	0.232446	0.007246	0.2343	0.449275	0.673913	0.985507	0.004831	0.277778	0.628019	0.823671	0.997585	0.002415	0.231884	0.422705	0.615942	1	0.669082	0.171498	0.15942	0.067797	0.038741	0	0.002415	0.270531	0.657005	0.823671	1	0.009662	0.176329	0.359903	0.536232	0.927536	0.111111	0.198068	0.381643	0.512077	0.652174	0.574879	0.2954	0.009662	0.316425	0.666667	0.809179	0.995169	0.437198
0.284884	0.337209	0.377907	0.19883	0.210526	0.274854	0.046512	0.302326	0.546512	0.802326	0.965116	0.017442	0.226744	0.418605	0.662791	1	0.005814	0.255814	0.488372	0.738372	0.994186	0.406977	0.494186	0.098837	0.152047	0.023392	0	0.005814	0.319767	0.656977	0.773256	1	0.011628	0.30814	0.505814	0.744186	0.94186	0.087209	0.127907	0.151163	0.174419	0.203488	0.569767	0.397661	0.011628	0.27907	0.534884	0.744186	0.994186	0.354651
0.318264	0.385172	0.296564	0.228261	0.199275	0.226449	0.01085	0.244123	0.468354	0.76311	0.994575	0.003617	0.253165	0.520796	0.759494	1	0.001808	0.240506	0.481013	0.712477	0.998192	0.481013	0.063291	0.455696	0.019928	0.077899	0.005435	0.001808	0.249548	0.636528	0.831826	1	0.056058	0.068716	0.206148	0.381555	0.942134	0.005425	0.305606	0.468354	0.650995	0.985533	0.533454	0.358696	0.007233	0.233273	0.471971	0.654611	0.990958	0.396022
0.408	0.344	0.248	0.290323	0.241935	0.177419	0.016	0.216	0.44	0.728	0.984	0.048	0.296	0.552	0.76	0.992	0.008	0.136	0.368	0.616	1	0.464	0.536	0	0.193548	0	0	0.008	0.272	0.528	0.76	1	0.04	0.224	0.488	0.712	0.992	0	0	0	0	0	0.416	0.322581	0.048	0.248	0.496	0.616	0.944	0.336
0.332031	0.332031	0.335938	0.227451	0.235294	0.243137	0.011719	0.214844	0.4375	0.730469	0.988281	0.019531	0.292969	0.539062	0.71875	0.996094	0.003906	0.246094	0.5	0.761719	1	0.460938	0.292969	0.246094	0.12549	0.062745	0	0.003906	0.230469	0.441406	0.699219	1	0.164062	0.304688	0.503906	0.761719	0.941406	0.050781	0.125	0.53125	0.8125	0.988281	0.5	0.423529	0.015625	0.324219	0.511719	0.761719	0.992188	0.382812
0.345133	0.510324	0.144543	0.322485	0.076923	0.180473	0.014749	0.20059	0.380531	0.59882	1	0.011799	0.315634	0.572271	0.766962	0.9941	0.00295	0.292035	0.557522	0.80236	0.985251	0.935103	0.020649	0.044248	0.023669	0.04142	0	0.00295	0.265487	0.519174	0.755162	1	0.032448	0.032448	0.132743	0.442478	0.852507	0.20059	0.20649	0.218289	0.410029	0.973451	0.233038	0.337278	0.00885	0.433628	0.690265	0.855457	0.982301	0.466077
0.325991	0.348018	0.325991	0.230088	0.199115	0.238938	0.030837	0.246696	0.506608	0.69163	1	0.008811	0.198238	0.471366	0.740088	0.995595	0.004405	0.312775	0.53304	0.770925	0.991189	0.577093	0.229075	0.193833	0.075221	0.048673	0.013274	0.004405	0.176211	0.471366	0.69163	1	0.105727	0.365639	0.453744	0.784141	0.995595	0.264317	0.30837	0.546256	0.92511	0.977974	0.471366	0.415929	0.017621	0.361233	0.568282	0.806167	0.995595	0.321586
0.295082	0.327869	0.377049	0.197802	0.258242	0.274725	0.016393	0.245902	0.47541	0.73224	1	0.038251	0.196721	0.469945	0.704918	0.983607	0.005464	0.273224	0.513661	0.786885	0.994536	0.409836	0.480874	0.10929	0.142857	0.032967	0	0.005464	0.213115	0.535519	0.825137	1	0.016393	0.349727	0.530055	0.721311	0.994536	0.092896	0.114754	0.256831	0.284153	0.759563	0.453552	0.494505	0.021858	0.26776	0.497268	0.748634	0.994536	0.387978
0.283978	0.447514	0.268508	0.21792	0.18031	0.220133	0.00884	0.232044	0.436464	0.674033	0.998895	0.003315	0.278453	0.59558	0.777901	0.996685	0.001105	0.227624	0.427624	0.687293	1	0.60663	0.124862	0.268508	0.063053	0.058628	0.003319	0.001105	0.303867	0.59116	0.776796	1	0.029834	0.19337	0.324862	0.470718	0.814365	0.00442	0.21326	0.38895	0.767956	0.956906	0.483978	0.435841	0.00442	0.296133	0.569061	0.775691	0.99116	0.443094
0.36	0.368	0.272	0.261044	0.212851	0.212851	0.012	0.316	0.544	0.744	0.964	0.008	0.244	0.468	0.708	0.996	0.004	0.18	0.46	0.776	1	0.596	0.056	0.348	0.040161	0.11245	0	0.004	0.192	0.476	0.796	1	0.04	0.048	0.292	0.928	0.988	0.068	0.328	0.508	0.668	0.908	0.452	0.393574	0.02	0.236	0.432	0.836	0.992	0.384
0.310087	0.315068	0.374844	0.190773	0.269327	0.24813	0.002491	0.234122	0.486924	0.740971	1	0.004981	0.265255	0.499377	0.752179	0.996264	0.001245	0.250311	0.496887	0.742217	0.998755	0.466999	0.242839	0.290162	0.100998	0.05611	0.003741	0.001245	0.231631	0.460772	0.737235	1	0.038605	0.200498	0.420922	0.803238	0.998755	0.006227	0.32005	0.542964	0.703611	0.992528	0.570361	0.408978	0.003736	0.255293	0.473225	0.726027	0.998755	0.303861
0.346908	0.315234	0.337858	0.21148	0.238671	0.234139	0.003017	0.269985	0.552036	0.775264	0.996983	0.004525	0.199095	0.434389	0.707391	1	0.001508	0.28356	0.514329	0.745098	0.998492	0.411765	0.162896	0.425339	0.070997	0.070997	0.004532	0.001508	0.26546	0.496229	0.822021	1	0.003017	0.182504	0.377074	0.886878	0.998492	0.027149	0.248869	0.527903	0.671192	0.924585	0.544495	0.392749	0.004525	0.250377	0.475113	0.711916	0.998492	0.33635
0.346361	0.361186	0.292453	0.240216	0.180837	0.225371	0.004043	0.219677	0.508086	0.799191	0.998652	0.002695	0.226415	0.478437	0.718329	1	0.001348	0.304582	0.5	0.725067	0.997305	0.486523	0.122642	0.390836	0.044534	0.08502	0.004049	0.001348	0.136119	0.393531	0.690027	1	0.009434	0.339623	0.501348	0.656334	0.91779	0.030997	0.361186	0.59434	0.836927	0.995957	0.478437	0.334683	0.008086	0.281671	0.475741	0.722372	0.997305	0.374663
0.4	0.27907	0.32093	0.214953	0.247664	0.205607	0.023256	0.260465	0.539535	0.813953	1	0.013953	0.209302	0.460465	0.702326	0.948837	0.004651	0.251163	0.497674	0.711628	0.962791	0.446512	0.386047	0.167442	0.135514	0.060748	0.004673	0.004651	0.311628	0.6	0.813953	1	0.009302	0.27907	0.446512	0.623256	0.962791	0.069767	0.204651	0.246512	0.753488	0.930233	0.44186	0.392523	0.009302	0.232558	0.44186	0.67907	0.962791	0.297674
0.40458	0.274809	0.320611	0.176923	0.238462	0.176923	0.022901	0.305344	0.473282	0.687023	0.954198	0.053435	0.221374	0.541985	0.80916	0.984733	0.007634	0.198473	0.381679	0.778626	1	0.343511	0.366412	0.290076	0.176923	0.053846	0.007692	0.007634	0.335878	0.564885	0.725191	1	0.175573	0.389313	0.549618	0.80916	0.992366	0.022901	0.083969	0.244275	0.312977	0.916031	0.458015	0.430769	0.030534	0.244275	0.557252	0.793893	0.992366	0.267176
0.369309	0.323777	0.306914	0.214527	0.222973	0.190878	0.003373	0.165261	0.514334	0.777403	1	0.016863	0.252951	0.448567	0.733558	0.998314	0.001686	0.29511	0.49747	0.708263	0.989882	0.522766	0.150084	0.32715	0.052365	0.072635	0.005068	0.001686	0.129848	0.403035	0.76054	1	0.163575	0.413153	0.598651	0.718381	0.848229	0.145025	0.340641	0.509275	0.743676	0.920742	0.480607	0.320946	0.015177	0.303541	0.485666	0.706577	0.919056	0.367622
0.354198	0.377099	0.268702	0.25841	0.174312	0.200306	0.00458	0.224427	0.509924	0.8	1	0.003053	0.250382	0.471756	0.731298	0.993893	0.001527	0.265649	0.517557	0.708397	0.99542	0.523664	0.158779	0.317557	0.061162	0.058104	0.003058	0.001527	0.251908	0.505344	0.763359	1	0.045802	0.265649	0.473282	0.570992	0.874809	0.061069	0.244275	0.552672	0.824427	0.99542	0.448855	0.357798	0.019847	0.244275	0.526718	0.70687	0.99542	0.410687
0.374233	0.312883	0.312883	0.234568	0.234568	0.203704	0.042945	0.226994	0.546012	0.797546	0.993865	0.018405	0.269939	0.503067	0.717791	1	0.006135	0.196319	0.453988	0.705521	0.97546	0.392638	0.165644	0.441718	0.080247	0.104938	0.018519	0.006135	0.282209	0.564417	0.754601	1	0.018405	0.196319	0.263804	0.343558	0.760736	0.02454	0.380368	0.539877	0.840491	0.98773	0.607362	0.333333	0.01227	0.257669	0.478528	0.687117	0.97546	0.343558
0.355183	0.314024	0.330793	0.210687	0.232061	0.218321	0.003049	0.272866	0.551829	0.78811	0.989329	0.006098	0.190549	0.419207	0.696646	1	0.001524	0.282012	0.493902	0.731707	0.998476	0.403963	0.16311	0.432927	0.071756	0.077863	0.00458	0.001524	0.304878	0.510671	0.821646	1	0.004573	0.179878	0.394817	0.868902	0.998476	0.028963	0.26372	0.530488	0.676829	0.92378	0.544207	0.381679	0.006098	0.245427	0.449695	0.690549	0.998476	0.306402
0.4	0.372222	0.227778	0.27933	0.206704	0.167598	0.011111	0.211111	0.455556	0.705556	1	0.05	0.261111	0.444444	0.755556	0.988889	0.005556	0.377778	0.577778	0.738889	0.961111	0.561111	0.166667	0.272222	0.061453	0.061453	0.01676	0.005556	0.216667	0.361111	0.522222	1	0.094444	0.533333	0.744444	0.8	0.933333	0.016667	0.444444	0.65	0.866667	0.988889	0.361111	0.379888	0.033333	0.338889	0.466667	0.727778	0.933333	0.377778
0.360406	0.390863	0.248731	0.260204	0.188776	0.183673	0.045685	0.203046	0.451777	0.695431	0.989848	0.010152	0.258883	0.57868	0.791878	1	0.005076	0.213198	0.441624	0.639594	0.984772	0.598985	0.182741	0.218274	0.061224	0.040816	0	0.005076	0.269036	0.634518	0.80203	1	0.025381	0.441624	0.527919	0.675127	0.908629	0.096447	0.142132	0.19797	0.416244	0.614213	0.360406	0.326531	0.040609	0.35533	0.538071	0.86802	0.984772	0.390863
0.304286	0.492857	0.202857	0.263233	0.134478	0.180258	0.005714	0.288571	0.558571	0.781429	0.998571	0.004286	0.21	0.381429	0.618571	0.994286	0.001429	0.39	0.68	0.827143	1	0.728571	0.065714	0.205714	0.02289	0.048641	0.005722	0.001429	0.181429	0.364286	0.545714	1	0.651429	0.724286	0.812857	0.872857	0.924286	0.554286	0.634286	0.744286	0.911429	0.995714	0.277143	0.228898	0.002857	0.63	0.74	0.864286	0.995714	0.471429
0.27652	0.414779	0.308701	0.239857	0.168258	0.272076	0.002384	0.278903	0.533969	0.780691	0.998808	0.004768	0.24553	0.481526	0.72944	1	0.001192	0.22646	0.489869	0.741359	0.997616	0.487485	0.216925	0.29559	0.100239	0.057279	0.002387	0.001192	0.196663	0.464839	0.736591	1	0.039333	0.218117	0.406436	0.806913	0.997616	0.005959	0.333731	0.575685	0.756853	0.991657	0.561383	0.400955	0.003576	0.25149	0.475566	0.738975	0.997616	0.462455
0.45092	0.392638	0.156442	0.378462	0.12	0.098462	0.006135	0.315951	0.527607	0.760736	0.993865	0.009202	0.340491	0.625767	0.834356	1	0.003067	0.113497	0.199387	0.312883	0.745399	0.671779	0.101227	0.226994	0.067692	0.092308	0	0.003067	0.346626	0.558282	0.757669	1	0.052147	0.122699	0.233129	0.325153	0.518405	0.01227	0.171779	0.47546	0.806748	0.98773	0.220859	0.276923	0.009202	0.156442	0.257669	0.441718	0.97546	0.380368
0.324228	0.350356	0.325416	0.239001	0.210464	0.224732	0.008314	0.238717	0.486936	0.73753	0.998812	0.003563	0.251781	0.534442	0.774347	0.996437	0.001188	0.239905	0.480998	0.726841	1	0.406176	0.2019	0.391924	0.070155	0.084423	0.008323	0.001188	0.249406	0.526128	0.756532	1	0.004751	0.23753	0.566508	0.700713	0.947743	0.007126	0.25772	0.396675	0.748219	0.997625	0.598575	0.35434	0.004751	0.220903	0.488124	0.752969	0.996437	0.385986
0.343915	0.354497	0.301587	0.260638	0.191489	0.25	0.015873	0.296296	0.550265	0.777778	1	0.010582	0.206349	0.449735	0.698413	0.994709	0.005291	0.216931	0.444444	0.677249	0.941799	0.449735	0.37037	0.179894	0.159574	0.021277	0	0.005291	0.21164	0.592593	0.851852	1	0.047619	0.179894	0.486772	0.666667	0.957672	0.338624	0.375661	0.42328	0.78836	0.835979	0.428571	0.478723	0.021164	0.359788	0.497354	0.666667	0.941799	0.333333
0.361233	0.374449	0.264317	0.286976	0.183223	0.181015	0.008811	0.312775	0.537445	0.797357	1	0.004405	0.202643	0.559471	0.779736	0.997797	0.002203	0.237885	0.389868	0.640969	0.951542	0.493392	0.160793	0.345815	0.06181	0.07064	0.004415	0.002203	0.314978	0.645374	0.876652	1	0.090308	0.286344	0.486784	0.656388	0.768722	0.006608	0.19163	0.376652	0.588106	0.854626	0.508811	0.317881	0.006608	0.200441	0.398678	0.640969	0.852423	0.387665
0.398438	0.328125	0.273438	0.251969	0.220472	0.15748	0.023438	0.25	0.5	0.742188	0.976562	0.015625	0.28125	0.539062	0.796875	0.992188	0.007812	0.148438	0.335938	0.632812	1	0.3125	0.21875	0.46875	0.07874	0.062992	0.015748	0.007812	0.265625	0.421875	0.734375	1	0.03125	0.078125	0.382812	0.484375	0.71875	0.125	0.234375	0.648438	0.859375	0.976562	0.40625	0.362205	0.03125	0.179688	0.40625	0.609375	0.8125	0.375
0.343137	0.367647	0.289216	0.275862	0.216749	0.211823	0.039216	0.294118	0.5	0.79902	0.990196	0.009804	0.230392	0.47549	0.72549	1	0.004902	0.171569	0.465686	0.661765	0.946078	0.421569	0.328431	0.25	0.068966	0.059113	0.009852	0.004902	0.132353	0.254902	0.534314	1	0.014706	0.333333	0.764706	0.857843	0.941176	0.063725	0.495098	0.578431	0.666667	0.985294	0.45098	0.413793	0.014706	0.313725	0.519608	0.745098	0.931373	0.387255
0.364764	0.291563	0.343672	0.231056	0.265839	0.206211	0.008685	0.272953	0.524814	0.76799	0.996278	0.007444	0.229529	0.473945	0.738213	0.993797	0.001241	0.234491	0.490074	0.745658	1	0.483871	0.225806	0.290323	0.098137	0.053416	0.001242	0.001241	0.208437	0.452854	0.735732	1	0.004963	0.186104	0.431762	0.815136	0.96402	0.008685	0.333747	0.555831	0.709677	0.995037	0.575682	0.402484	0.002481	0.263027	0.48139	0.744417	0.996278	0.291563
0.345932	0.363717	0.290351	0.242883	0.205961	0.207295	0.003112	0.266785	0.536683	0.738995	1	0.000889	0.241885	0.470431	0.752334	0.998666	0.000445	0.228991	0.489551	0.767452	0.998221	0.501112	0.102268	0.396621	0.047153	0.08452	0.003559	0.000445	0.30458	0.53446	0.746109	1	0.001779	0.251667	0.435305	0.603824	0.986661	0.008004	0.185416	0.468208	0.781236	0.996443	0.501112	0.395018	0.001334	0.242775	0.494442	0.767452	0.998221	0.392174
0.301325	0.403974	0.294702	0.212625	0.186047	0.245847	0.009934	0.31457	0.533113	0.761589	0.993377	0.013245	0.195364	0.463576	0.741722	0.996689	0.003311	0.18543	0.450331	0.718543	1	0.576159	0.274834	0.149007	0.086379	0.039867	0.006645	0.003311	0.274834	0.576159	0.781457	1	0.15894	0.364238	0.556291	0.854305	0.970199	0.013245	0.046358	0.082781	0.221854	0.629139	0.596026	0.285714	0.023179	0.195364	0.450331	0.758278	0.976821	0.400662
0.311475	0.401639	0.286885	0.251029	0.176955	0.271605	0.012295	0.233607	0.459016	0.770492	0.995902	0.008197	0.22541	0.528689	0.778689	1	0.004098	0.258197	0.47541	0.704918	0.983607	0.311475	0.077869	0.610656	0.032922	0.106996	0	0.004098	0.184426	0.397541	0.778689	1	0.471311	0.79918	0.848361	0.868852	0.897541	0.028689	0.278689	0.487705	0.655738	0.987705	0.495902	0.378601	0.036885	0.27459	0.471311	0.672131	0.983607	0.389344
0.346883	0.298103	0.355014	0.195652	0.282609	0.206522	0.02981	0.243902	0.533875	0.791328	0.99729	0.00542	0.257453	0.452575	0.728997	0.98645	0.00271	0.230352	0.517615	0.750678	1	0.368564	0.214092	0.417344	0.076087	0.081522	0	0.00271	0.284553	0.479675	0.804878	1	0.01084	0.186992	0.382114	0.528455	0.99187	0.04878	0.243902	0.590786	0.775068	0.98374	0.604336	0.413043	0.01084	0.271003	0.495935	0.734417	0.99458	0.306233
0.301994	0.384615	0.31339	0.225714	0.197143	0.222857	0.014245	0.293447	0.512821	0.752137	0.997151	0.005698	0.159544	0.430199	0.749288	1	0.002849	0.290598	0.541311	0.737892	0.988604	0.481481	0.518519	0	0.188571	0	0	0.002849	0.213675	0.48433	0.732194	1	0.039886	0.267806	0.507123	0.746439	0.985755	0	0	0	0	0	0.606838	0.382857	0.008547	0.264957	0.498575	0.720798	0.982906	0.452991
0.290554	0.455852	0.253593	0.244604	0.14594	0.220966	0.002053	0.285421	0.514374	0.782341	0.997947	0.007187	0.198152	0.497947	0.762834	1	0.001027	0.287474	0.478439	0.701232	0.998973	0.559548	0.101643	0.338809	0.040082	0.068859	0.007194	0.001027	0.143737	0.428131	0.688912	1	0.00924	0.337782	0.467146	0.663244	0.932238	0.207392	0.396304	0.63963	0.799795	0.995893	0.434292	0.324769	0.007187	0.296715	0.488706	0.716632	0.99692	0.474333
0.337587	0.349188	0.313225	0.261324	0.207898	0.212544	0.00464	0.24826	0.470998	0.700696	0.99536	0.00232	0.213457	0.490719	0.75522	0.99884	0.00116	0.287703	0.537123	0.769142	1	0.515081	0.216937	0.267981	0.091754	0.049942	0.001161	0.00116	0.183295	0.429234	0.693735	1	0.0058	0.227378	0.527842	0.75522	0.99884	0.100928	0.400232	0.598608	0.796984	0.991879	0.529002	0.376307	0.00348	0.301624	0.580046	0.793503	0.99768	0.354988
0.477124	0.202614	0.320261	0.171053	0.348684	0.171053	0.013072	0.267974	0.477124	0.732026	1	0.065359	0.189542	0.398693	0.594771	0.901961	0.006536	0.235294	0.575163	0.784314	0.980392	0.339869	0.300654	0.359477	0.125	0.072368	0.006579	0.006536	0.143791	0.54902	0.75817	1	0.013072	0.235294	0.588235	0.856209	0.954248	0.058824	0.313725	0.405229	0.627451	0.973856	0.392157	0.486842	0.019608	0.202614	0.51634	0.745098	0.980392	0.228758
0.326087	0.23913	0.434783	0.120879	0.318681	0.21978	0.021739	0.141304	0.423913	0.684783	0.956522	0.184783	0.304348	0.554348	0.804348	1	0.01087	0.195652	0.48913	0.73913	0.978261	0.163043	0	0.836957	0	0.10989	0	0.01087	0.184783	0.315217	0.847826	1	0	0	0	0	0	0.032609	0.26087	0.48913	0.717391	0.967391	0.630435	0.43956	0.043478	0.271739	0.532609	0.728261	0.978261	0.23913
0.27707	0.463376	0.259554	0.239234	0.140351	0.23445	0.009554	0.257962	0.466561	0.66879	0.988854	0.003185	0.237261	0.574841	0.835987	1	0.001592	0.248408	0.431529	0.656051	0.995223	0.55414	0.130573	0.315287	0.047847	0.060606	0.00319	0.001592	0.261146	0.625796	0.861465	1	0.133758	0.351911	0.487261	0.627389	0.708599	0.003185	0.205414	0.401274	0.600318	0.769108	0.558917	0.341308	0.003185	0.278662	0.506369	0.737261	0.996815	0.484076
0.382582	0.349922	0.267496	0.274143	0.214953	0.188474	0.004666	0.317263	0.562986	0.765163	0.998445	0.00311	0.222395	0.489891	0.790047	1	0.001555	0.202177	0.412131	0.651633	0.993779	0.51633	0.144635	0.339036	0.057632	0.066978	0.007788	0.001555	0.29549	0.676516	0.861586	1	0.07154	0.283048	0.391913	0.539658	0.872473	0.012442	0.186625	0.40591	0.606532	0.85381	0.471229	0.342679	0.012442	0.202177	0.412131	0.62675	0.993779	0.387247
0.365217	0.243478	0.391304	0.175439	0.289474	0.175439	0.026087	0.234783	0.504348	0.695652	1	0.034783	0.217391	0.426087	0.686957	0.991304	0.008696	0.278261	0.565217	0.756522	0.956522	0.417391	0.156522	0.426087	0.052632	0.087719	0	0.008696	0.2	0.356522	0.721739	1	0.286957	0.313043	0.426087	0.46087	0.782609	0.078261	0.478261	0.6	0.869565	0.982609	0.46087	0.368421	0.052174	0.321739	0.556522	0.747826	0.982609	0.217391
0.319088	0.413105	0.267806	0.205714	0.182857	0.222857	0.017094	0.299145	0.501425	0.672365	0.980057	0.005698	0.262108	0.509972	0.792023	0.991453	0.002849	0.19943	0.444444	0.698006	1	0.723647	0.193732	0.082621	0.085714	0.034286	0.005714	0.002849	0.296296	0.561254	0.777778	1	0.079772	0.148148	0.267806	0.358974	0.917379	0.008547	0.45584	0.481481	0.940171	0.962963	0.452991	0.308571	0.014245	0.239316	0.501425	0.774929	0.982906	0.421652
0.422907	0.273128	0.303965	0.247788	0.252212	0.176991	0.039648	0.281938	0.550661	0.837004	1	0.035242	0.264317	0.497797	0.665198	0.929515	0.004405	0.15859	0.405286	0.660793	0.982379	0.370044	0.246696	0.38326	0.088496	0.079646	0	0.004405	0.237885	0.488987	0.85022	1	0.008811	0.123348	0.436123	0.612335	0.955947	0.101322	0.334802	0.585903	0.779736	0.903084	0.480176	0.460177	0.008811	0.246696	0.471366	0.665198	0.982379	0.299559
0.316384	0.384181	0.299435	0.249292	0.192635	0.209632	0.022599	0.268362	0.502825	0.731638	0.99435	0.00565	0.189266	0.480226	0.779661	0.997175	0.002825	0.265537	0.516949	0.734463	1	0.491525	0.163842	0.344633	0.073654	0.050992	0.011331	0.002825	0.29661	0.573446	0.841808	1	0.09887	0.305085	0.514124	0.607345	0.988701	0.025424	0.180791	0.364407	0.686441	0.943503	0.50565	0.402266	0.022599	0.20339	0.403955	0.672316	0.988701	0.403955
0.394737	0.328947	0.276316	0.246696	0.202643	0.180617	0.013158	0.236842	0.464912	0.723684	0.986842	0.008772	0.25	0.513158	0.785088	1	0.004386	0.201754	0.473684	0.666667	0.995614	0.324561	0.118421	0.557018	0.044053	0.096916	0	0.004386	0.135965	0.539474	0.745614	1	0.013158	0.399123	0.780702	0.842105	0.881579	0.04386	0.267544	0.460526	0.618421	0.97807	0.504386	0.334802	0.008772	0.20614	0.469298	0.671053	0.991228	0.320175
0.357143	0.295918	0.346939	0.201365	0.238908	0.228669	0.010204	0.27551	0.520408	0.778912	1	0.006803	0.214286	0.486395	0.690476	0.996599	0.003401	0.238095	0.493197	0.734694	0.989796	0.387755	0.166667	0.445578	0.047782	0.095563	0	0.003401	0.173469	0.442177	0.707483	1	0.180272	0.357143	0.455782	0.653061	0.741497	0.034014	0.241497	0.534014	0.833333	0.993197	0.540816	0.395904	0.02381	0.255102	0.486395	0.676871	0.989796	0.326531
0.30719	0.411765	0.281046	0.246725	0.174672	0.251092	0.013072	0.211329	0.448802	0.762527	1	0.004357	0.261438	0.488017	0.740741	0.997821	0.002179	0.239651	0.533769	0.727669	0.984749	0.457516	0.082789	0.459695	0.045852	0.080786	0.002183	0.002179	0.206972	0.359477	0.636166	1	0.04793	0.163399	0.389978	0.6122	0.884532	0.010893	0.444444	0.594771	0.840959	0.989107	0.498911	0.379913	0.017429	0.331155	0.590414	0.736383	0.986928	0.420479
0.394737	0.324561	0.280702	0.221239	0.20354	0.176991	0.035088	0.236842	0.421053	0.754386	0.991228	0.026316	0.263158	0.535088	0.640351	1	0.008772	0.219298	0.5	0.763158	0.973684	0.403509	0.263158	0.333333	0.088496	0.070796	0.017699	0.008772	0.315789	0.508772	0.868421	1	0.04386	0.096491	0.447368	0.561404	0.824561	0.157895	0.22807	0.622807	0.701754	0.929825	0.438596	0.40708	0.026316	0.210526	0.45614	0.649123	0.973684	0.289474
0.316742	0.361991	0.321267	0.204545	0.240909	0.236364	0.00905	0.253394	0.434389	0.719457	0.995475	0.013575	0.276018	0.579186	0.737557	1	0.004525	0.180995	0.466063	0.751131	0.963801	0.59276	0.361991	0.045249	0.109091	0.027273	0	0.004525	0.303167	0.570136	0.751131	1	0.022624	0.140271	0.411765	0.81448	0.968326	0.330317	0.343891	0.357466	0.60181	0.615385	0.542986	0.309091	0.022624	0.226244	0.552036	0.773756	0.977376	0.375566
0.330544	0.401674	0.267782	0.268908	0.205882	0.193277	0.012552	0.225941	0.506276	0.769874	1	0.008368	0.242678	0.543933	0.757322	0.995816	0.004184	0.251046	0.430962	0.623431	0.970711	0.322176	0.09205	0.585774	0.042017	0.109244	0	0.004184	0.175732	0.472803	0.790795	1	0.435146	0.76569	0.824268	0.853556	0.979079	0.029289	0.242678	0.447699	0.610879	0.953975	0.485356	0.352941	0.050209	0.242678	0.439331	0.65272	0.970711	0.426778
0.323944	0.341549	0.334507	0.183746	0.222615	0.268551	0.010563	0.34507	0.542254	0.795775	1	0.007042	0.190141	0.380282	0.679577	0.989437	0.003521	0.214789	0.528169	0.753521	0.996479	0.475352	0.179577	0.34507	0.056537	0.070671	0.007067	0.003521	0.302817	0.59507	0.84507	1	0.010563	0.070423	0.228873	0.56338	0.883803	0.098592	0.278169	0.454225	0.725352	0.975352	0.507042	0.438163	0.014085	0.207746	0.433099	0.683099	0.985915	0.352113
0.34205	0.354603	0.303347	0.237049	0.206698	0.21978	0.002615	0.239017	0.496339	0.745293	0.999477	0.001046	0.289749	0.526674	0.758891	1	0.000523	0.221757	0.462343	0.748954	0.998431	0.492678	0.106695	0.400628	0.048666	0.081109	0.002616	0.000523	0.312762	0.535565	0.737448	1	0.002615	0.244247	0.401151	0.573745	0.98431	0.018305	0.194561	0.5	0.804916	0.996339	0.529812	0.376766	0.001569	0.247385	0.508368	0.749477	0.998431	0.379184
0.293103	0.396552	0.310345	0.240444	0.196054	0.263872	0.002463	0.259852	0.5	0.761084	0.998768	0.004926	0.236453	0.511084	0.756158	1	0.001232	0.253695	0.490148	0.715517	0.997537	0.46798	0.231527	0.300493	0.094945	0.057953	0.003699	0.001232	0.195813	0.45936	0.743842	1	0.038177	0.263547	0.417488	0.796798	0.997537	0.006158	0.32266	0.57266	0.762315	0.991379	0.571429	0.401973	0.003695	0.258621	0.472906	0.738916	0.997537	0.453202
0.433333	0.288889	0.277778	0.258427	0.247191	0.168539	0.033333	0.244444	0.5	0.777778	1	0.022222	0.155556	0.444444	0.622222	0.988889	0.011111	0.222222	0.433333	0.688889	0.955556	0.177778	0	0.822222	0	0.067416	0	0.011111	0.044444	0.711111	0.755556	1	0	0	0	0	0	0.055556	0.244444	0.488889	0.688889	0.977778	0.322222	0.426966	0.077778	0.355556	0.555556	0.688889	0.955556	0.266667
0.350087	0.393414	0.256499	0.25	0.177083	0.204861	0.003466	0.279029	0.558059	0.759099	0.998267	0.008666	0.256499	0.461005	0.738302	0.996534	0.001733	0.214905	0.462738	0.740035	1	0.686308	0.117851	0.195841	0.059028	0.072917	0.003472	0.001733	0.275563	0.485269	0.7487	1	0.005199	0.155979	0.379549	0.655113	0.911612	0.031196	0.140381	0.544194	0.897747	0.991334	0.403813	0.399306	0.005199	0.239168	0.516464	0.783362	0.986135	0.40208
0.381022	0.329927	0.289051	0.249817	0.22279	0.191381	0.00219	0.275912	0.529927	0.776642	1	0.00146	0.19635	0.443066	0.723358	0.99927	0.00073	0.265693	0.510949	0.743796	0.978832	0.380292	0.066423	0.553285	0.030679	0.071585	0.004383	0.00073	0.167153	0.432117	0.731387	1	0.027737	0.143796	0.391241	0.7	0.956934	0.008029	0.289781	0.535036	0.773723	0.99562	0.449635	0.407597	0.006569	0.258394	0.471533	0.734307	0.978832	0.340876
0.292614	0.465909	0.241477	0.290598	0.136752	0.188034	0.008523	0.258523	0.522727	0.801136	0.997159	0.005682	0.184659	0.392045	0.639205	0.991477	0.002841	0.40625	0.616477	0.786932	1	0.616477	0.215909	0.167614	0.068376	0.034188	0.005698	0.002841	0.153409	0.306818	0.605114	1	0.329545	0.428977	0.622159	0.821023	0.977273	0.494318	0.596591	0.715909	0.84375	0.903409	0.596591	0.358974	0.017045	0.247159	0.528409	0.730114	0.977273	0.471591
0.445652	0.206522	0.347826	0.175824	0.318681	0.153846	0.021739	0.206522	0.5	0.76087	1	0.119565	0.326087	0.554348	0.684783	0.891304	0.01087	0.195652	0.413043	0.73913	0.956522	0.423913	0.521739	0.054348	0.10989	0.021978	0.021978	0.01087	0.26087	0.48913	0.717391	1	0.065217	0.336957	0.521739	0.771739	0.978261	0.054348	0.054348	0.086957	0.097826	0.119565	0.369565	0.505495	0.065217	0.26087	0.478261	0.728261	0.967391	0.195652
0.403756	0.300469	0.295775	0.231132	0.245283	0.212264	0.014085	0.183099	0.42723	0.713615	1	0.037559	0.342723	0.57277	0.755869	0.981221	0.004695	0.211268	0.469484	0.737089	0.99061	0.342723	0.234742	0.422535	0.084906	0.09434	0.009434	0.004695	0.187793	0.366197	0.704225	1	0.098592	0.206573	0.591549	0.741784	0.962441	0.00939	0.328638	0.511737	0.788732	0.99061	0.455399	0.490566	0.00939	0.28169	0.521127	0.751174	0.99061	0.361502
0.267857	0.487013	0.24513	0.214634	0.120325	0.253659	0.00487	0.224026	0.449675	0.775974	0.993506	0.003247	0.267857	0.540584	0.727273	0.996753	0.001623	0.23539	0.465909	0.709416	1	0.714286	0.097403	0.188312	0.053659	0.043902	0.001626	0.001623	0.279221	0.599026	0.805195	1	0.012987	0.238636	0.363636	0.456169	0.965909	0.035714	0.206169	0.308442	0.491883	0.988636	0.452922	0.360976	0.01461	0.232143	0.464286	0.668831	0.998377	0.48539
0.464103	0.310256	0.225641	0.275064	0.195373	0.151671	0.007692	0.292308	0.551282	0.771795	1	0.005128	0.212821	0.441026	0.725641	0.997436	0.002564	0.238462	0.45641	0.717949	0.946154	0.497436	0.158974	0.34359	0.071979	0.061697	0	0.002564	0.202564	0.446154	0.764103	1	0.007692	0.323077	0.5	0.689744	0.866667	0.048718	0.248718	0.584615	0.728205	0.928205	0.346154	0.359897	0.010256	0.238462	0.464103	0.725641	0.992308	0.317949
0.359629	0.322506	0.317865	0.22093	0.202326	0.216279	0.013921	0.243619	0.468677	0.807425	0.986079	0.00464	0.276102	0.522042	0.721578	0.99536	0.00232	0.234339	0.470998	0.700696	1	0.461717	0.092807	0.445476	0.037209	0.088372	0.004651	0.00232	0.211137	0.477958	0.791183	1	0.006961	0.090487	0.25522	0.802784	0.911833	0.109049	0.354988	0.531323	0.712297	0.99536	0.554524	0.344186	0.009281	0.315545	0.524362	0.712297	0.990719	0.345708
0.349593	0.406504	0.243902	0.226069	0.181263	0.189409	0.006098	0.21748	0.481707	0.697154	0.993902	0.004065	0.270325	0.565041	0.778455	0.995935	0.002033	0.268293	0.455285	0.711382	1	0.603659	0.103659	0.292683	0.03666	0.089613	0.004073	0.002033	0.221545	0.518293	0.776423	1	0.030488	0.26626	0.380081	0.528455	0.955285	0.028455	0.24187	0.449187	0.713415	0.932927	0.392276	0.362525	0.028455	0.24187	0.46748	0.73374	0.997967	0.418699
0.452096	0.434132	0.113772	0.381381	0.12012	0.069069	0.011976	0.275449	0.482036	0.718563	1	0.005988	0.308383	0.649701	0.805389	0.991018	0.002994	0.07485	0.212575	0.335329	0.556886	0.898204	0.020958	0.080838	0.018018	0.036036	0	0.002994	0.236527	0.538922	0.775449	1	0.020958	0.020958	0.335329	0.341317	0.347305	0.08982	0.254491	0.38024	0.44012	0.57485	0.173653	0.198198	0.038922	0.188623	0.290419	0.416168	0.772455	0.476048
0.339869	0.48366	0.176471	0.311475	0.147541	0.137705	0.055556	0.316993	0.470588	0.761438	0.973856	0.006536	0.153595	0.434641	0.748366	1	0.003268	0.398693	0.575163	0.718954	0.986928	0.699346	0.094771	0.205882	0.045902	0.039344	0	0.003268	0.205882	0.490196	0.816993	1	0.323529	0.578431	0.666667	0.718954	0.957516	0.006536	0.395425	0.447712	0.614379	0.75817	0.415033	0.334426	0.052288	0.199346	0.624183	0.862745	0.993464	0.477124
0.35468	0.347291	0.29803	0.254321	0.195062	0.204938	0.017241	0.256158	0.504926	0.76601	0.995074	0.009852	0.253695	0.502463	0.729064	0.997537	0.002463	0.199507	0.490148	0.736453	1	0.352217	0.150246	0.497537	0.064198	0.083951	0.004938	0.002463	0.229064	0.554187	0.807882	1	0.046798	0.189655	0.546798	0.935961	0.992611	0.014778	0.263547	0.445813	0.689655	0.891626	0.591133	0.380247	0.004926	0.253695	0.475369	0.699507	0.987685	0.366995
0.327273	0.42303	0.249697	0.275485	0.163835	0.206311	0.002424	0.241212	0.470303	0.779394	0.997576	0.006061	0.247273	0.558788	0.76	1	0.001212	0.270303	0.446061	0.681212	0.998788	0.486061	0.13697	0.37697	0.050971	0.080097	0.002427	0.001212	0.139394	0.408485	0.689697	1	0.007273	0.309091	0.473939	0.606061	0.718788	0.110303	0.344242	0.642424	0.835152	0.995152	0.442424	0.288835	0.006061	0.284848	0.493333	0.687273	0.996364	0.458182
0.348659	0.409962	0.241379	0.292308	0.165385	0.176923	0.011494	0.245211	0.505747	0.766284	1	0.007663	0.226054	0.51341	0.770115	0.961686	0.003831	0.241379	0.409962	0.670498	0.977011	0.643678	0.291188	0.065134	0.169231	0.030769	0	0.003831	0.275862	0.505747	0.804598	1	0.015326	0.176245	0.337165	0.56705	0.992337	0.666667	0.697318	0.712644	0.770115	0.796935	0.498084	0.284615	0.049808	0.283525	0.452107	0.685824	0.984674	0.383142
0.365678	0.401168	0.233154	0.269663	0.186067	0.174831	0.002246	0.252022	0.498203	0.749775	0.999102	0.000898	0.234052	0.464061	0.72956	1	0.000449	0.28257	0.570979	0.789757	0.990117	0.649146	0.119946	0.230907	0.054382	0.059775	0.006742	0.000449	0.240791	0.486074	0.730907	1	0.021114	0.375562	0.59434	0.709793	0.969901	0.002695	0.224618	0.466307	0.761456	0.993261	0.367475	0.343371	0.001348	0.268643	0.592992	0.784367	0.990117	0.427673
0.359929	0.41844	0.221631	0.309059	0.152753	0.179396	0.005319	0.274823	0.489362	0.696809	0.996454	0.003546	0.265957	0.512411	0.72695	1	0.001773	0.189716	0.446809	0.810284	0.992908	0.638298	0.171986	0.189716	0.065719	0.044405	0.005329	0.001773	0.317376	0.491135	0.656028	1	0.019504	0.147163	0.324468	0.812057	0.994681	0.04078	0.191489	0.693262	0.886525	0.978723	0.379433	0.294849	0.01773	0.230496	0.402482	0.803191	0.994681	0.409574
0.345133	0.389381	0.265487	0.25	0.196429	0.1875	0.035398	0.221239	0.451327	0.716814	0.982301	0.017699	0.274336	0.530973	0.743363	1	0.00885	0.123894	0.389381	0.690265	0.99115	0.460177	0.530973	0.00885	0.169643	0.008929	0.008929	0.00885	0.19469	0.486726	0.725664	1	0.044248	0.283186	0.566372	0.787611	0.99115	0.035398	0.035398	0.035398	0.035398	0.035398	0.40708	0.285714	0.044248	0.265487	0.557522	0.672566	0.99115	0.415929
0.347239	0.309202	0.343558	0.197789	0.275184	0.224816	0.002454	0.257669	0.51411	0.768098	1	0.004908	0.242945	0.450307	0.744785	0.996319	0.001227	0.239264	0.506748	0.733742	0.997546	0.480982	0.226994	0.292025	0.092138	0.052826	0.003686	0.001227	0.225767	0.426994	0.732515	1	0.038037	0.251534	0.43681	0.801227	0.997546	0.006135	0.310429	0.581595	0.711656	0.992638	0.557055	0.385749	0.003681	0.262577	0.48589	0.743558	0.997546	0.331288
0.359813	0.323988	0.316199	0.196568	0.23869	0.234009	0.012461	0.260125	0.503115	0.757009	1	0.003115	0.228972	0.479751	0.719626	0.990654	0.001558	0.249221	0.520249	0.761682	0.996885	0.362928	0.267913	0.369159	0.115445	0.059282	0.00936	0.001558	0.23676	0.450156	0.735202	1	0.004673	0.26947	0.556075	0.752336	0.965732	0.031153	0.23053	0.484424	0.761682	0.985981	0.593458	0.358814	0.003115	0.283489	0.512461	0.744548	0.996885	0.338006
0.364789	0.370423	0.264789	0.248237	0.197461	0.211566	0.002817	0.215493	0.502817	0.757746	0.998592	0.005634	0.28169	0.504225	0.752113	0.997183	0.001408	0.253521	0.456338	0.694366	1	0.54507	0.207042	0.247887	0.084626	0.059238	0.002821	0.001408	0.201408	0.484507	0.760563	1	0.025352	0.287324	0.440845	0.646479	0.997183	0.042254	0.356338	0.566197	0.743662	0.95493	0.44507	0.344147	0.011268	0.257746	0.457746	0.738028	0.995775	0.384507
0.406926	0.372294	0.220779	0.304348	0.16087	0.182609	0.012987	0.264069	0.47619	0.731602	1	0.008658	0.212121	0.502165	0.766234	0.995671	0.004329	0.199134	0.463203	0.727273	0.930736	0.549784	0.090909	0.359307	0.047826	0.056522	0.004348	0.004329	0.337662	0.619048	0.757576	1	0.017316	0.056277	0.333333	0.52381	0.978355	0.077922	0.168831	0.380952	0.562771	0.904762	0.320346	0.382609	0.017316	0.199134	0.497835	0.753247	0.969697	0.337662
0.427711	0.355422	0.216867	0.260606	0.169697	0.163636	0.03012	0.319277	0.572289	0.777108	1	0.012048	0.210843	0.493976	0.807229	0.993976	0.006024	0.174699	0.36747	0.536145	0.879518	0.554217	0.174699	0.271084	0.060606	0.060606	0.012121	0.006024	0.343373	0.722892	0.861446	1	0.024096	0.060241	0.295181	0.373494	0.554217	0.096386	0.156627	0.433735	0.518072	0.710843	0.445783	0.387879	0.024096	0.222892	0.433735	0.753012	0.975904	0.39759
0.340426	0.404255	0.255319	0.3	0.178571	0.157143	0.049645	0.22695	0.510638	0.659574	1	0.014184	0.319149	0.602837	0.843972	0.978723	0.007092	0.184397	0.361702	0.560284	0.964539	0.496454	0.446809	0.056738	0.157143	0.014286	0	0.007092	0.333333	0.602837	0.815603	1	0.014184	0.148936	0.340426	0.539007	0.77305	0.886525	0.893617	0.907801	0.921986	0.93617	0.35461	0.414286	0.014184	0.184397	0.397163	0.638298	0.907801	0.375887
0.279245	0.366038	0.354717	0.200758	0.231061	0.238636	0.026415	0.271698	0.464151	0.773585	0.996226	0.007547	0.181132	0.498113	0.720755	0.984906	0.003774	0.283019	0.520755	0.724528	1	0.418868	0.29434	0.286792	0.087121	0.041667	0.003788	0.003774	0.207547	0.50566	0.690566	1	0.124528	0.222642	0.460377	0.713208	0.856604	0.018868	0.362264	0.539623	0.920755	0.992453	0.566038	0.386364	0.011321	0.267925	0.509434	0.728302	0.988679	0.388679
0.40458	0.274809	0.320611	0.223077	0.3	0.2	0.015267	0.221374	0.435115	0.725191	0.992366	0.038168	0.236641	0.587786	0.770992	1	0.007634	0.244275	0.48855	0.717557	0.977099	0.251908	0	0.748092	0	0.123077	0	0.007634	0.259542	0.480916	0.687023	1	0	0	0	0	0	0.022901	0.229008	0.526718	0.763359	0.984733	0.534351	0.415385	0.045802	0.312977	0.572519	0.740458	0.977099	0.320611
0.383356	0.326057	0.290587	0.25	0.229508	0.173497	0.005457	0.236016	0.523874	0.793997	1	0.002729	0.249659	0.492497	0.731241	0.995907	0.001364	0.255116	0.457026	0.698499	0.997271	0.480218	0.060027	0.459754	0.02459	0.095628	0.010929	0.001364	0.244202	0.476126	0.806276	1	0.155525	0.321965	0.357435	0.854025	0.897681	0.00955	0.229195	0.515689	0.695771	0.986357	0.432469	0.423497	0.008186	0.276944	0.435198	0.658936	0.994543	0.342428
0.424242	0.30303	0.272727	0.305344	0.221374	0.21374	0.022727	0.325758	0.515152	0.772727	1	0.015152	0.227273	0.530303	0.80303	0.992424	0.007576	0.143939	0.371212	0.659091	0.954545	0.530303	0.113636	0.356061	0.045802	0.091603	0	0.007576	0.295455	0.712121	0.840909	1	0.022727	0.037879	0.128788	0.159091	0.954545	0.204545	0.310606	0.484848	0.613636	0.704545	0.416667	0.48855	0.015152	0.159091	0.371212	0.681818	0.954545	0.310606
0.301552	0.394678	0.303769	0.242222	0.177778	0.233333	0.004435	0.226164	0.518847	0.807095	1	0.006652	0.261641	0.505543	0.740576	0.993348	0.002217	0.24612	0.474501	0.696231	0.980044	0.463415	0.121951	0.414634	0.044444	0.084444	0.004444	0.002217	0.223947	0.487805	0.804878	1	0.011086	0.093126	0.40133	0.844789	0.946785	0.108647	0.332594	0.527716	0.698448	0.984479	0.569845	0.346667	0.013304	0.312639	0.523282	0.711752	0.988914	0.392461
0.371901	0.285124	0.342975	0.215768	0.26556	0.186722	0.016529	0.231405	0.557851	0.752066	0.995868	0.008264	0.260331	0.541322	0.81405	1	0.004132	0.239669	0.421488	0.681818	0.884298	0.483471	0.128099	0.38843	0.06639	0.06639	0.024896	0.004132	0.214876	0.590909	0.863636	1	0.020661	0.095041	0.173554	0.681818	0.88843	0.057851	0.31405	0.442149	0.607438	0.809917	0.545455	0.348548	0.024793	0.272727	0.446281	0.673554	0.896694	0.285124
0.334928	0.365231	0.299841	0.209265	0.20607	0.196486	0.025518	0.259968	0.539075	0.755981	0.998405	0.00319	0.14992	0.425837	0.757576	0.99681	0.001595	0.339713	0.507177	0.716108	1	0.424242	0.132376	0.443381	0.043131	0.091054	0.004792	0.001595	0.204147	0.460925	0.744817	1	0.271132	0.475279	0.633174	0.77512	0.856459	0.004785	0.244019	0.454545	0.748006	0.984051	0.494418	0.341853	0.015949	0.339713	0.518341	0.720893	0.99681	0.398724
0.419429	0.310857	0.269714	0.231121	0.212815	0.172769	0.003429	0.284571	0.573714	0.790857	0.996571	0.002286	0.229714	0.472	0.749714	1	0.001143	0.234286	0.417143	0.627429	0.995429	0.500571	0.132571	0.366857	0.051487	0.083524	0.008009	0.001143	0.230857	0.585143	0.778286	1	0.059429	0.253714	0.397714	0.656	0.966857	0.045714	0.261714	0.492571	0.766857	0.996571	0.406857	0.356979	0.005714	0.224	0.393143	0.562286	0.995429	0.341714
0.391198	0.410758	0.198044	0.316176	0.169118	0.139706	0.012225	0.315403	0.552567	0.819071	0.997555	0.00489	0.210269	0.425428	0.682152	0.99022	0.002445	0.259169	0.542787	0.728606	1	0.748166	0.09291	0.158924	0.036765	0.061275	0.007353	0.002445	0.217604	0.440098	0.753056	1	0.03912	0.276284	0.584352	0.731051	0.973105	0.09291	0.486553	0.625917	0.772616	0.93643	0.352078	0.303922	0.03423	0.227384	0.381418	0.674817	0.987775	0.471883
0.329412	0.4	0.270588	0.22619	0.22619	0.22619	0.035294	0.294118	0.517647	0.682353	0.988235	0.023529	0.188235	0.435294	0.776471	0.976471	0.011765	0.164706	0.458824	0.670588	1	0.529412	0.258824	0.211765	0.142857	0.047619	0	0.011765	0.2	0.517647	0.788235	1	0.070588	0.552941	0.647059	0.764706	0.941176	0.141176	0.235294	0.294118	0.341176	0.4	0.447059	0.52381	0.058824	0.270588	0.6	0.776471	0.952941	0.329412
0.337838	0.351351	0.310811	0.236806	0.215156	0.2341	0.008108	0.27973	0.521622	0.75	0.997297	0.002703	0.214865	0.468919	0.739189	0.998649	0.001351	0.262162	0.497297	0.754054	1	0.497297	0.164865	0.337838	0.069012	0.071719	0.006766	0.001351	0.217568	0.387838	0.718919	1	0.056757	0.262162	0.491892	0.693243	0.997297	0.005405	0.402703	0.571622	0.841892	0.985135	0.524324	0.359946	0.005405	0.222973	0.471622	0.744595	0.995946	0.378378
0.396552	0.327586	0.275862	0.313043	0.269565	0.156522	0.017241	0.275862	0.534483	0.706897	1	0.034483	0.232759	0.62931	0.844828	0.974138	0.008621	0.189655	0.396552	0.525862	0.87931	0.508621	0.241379	0.25	0.104348	0.052174	0	0.008621	0.318966	0.663793	0.87069	1	0.241379	0.465517	0.525862	0.706897	0.810345	0.025862	0.077586	0.189655	0.362069	0.431034	0.336207	0.330435	0.051724	0.163793	0.422414	0.698276	0.853448	0.344828
0.304688	0.382812	0.3125	0.212598	0.19685	0.23622	0.015625	0.234375	0.5	0.640625	0.945312	0.03125	0.164062	0.421875	0.773438	1	0.007812	0.25	0.515625	0.734375	0.953125	0.421875	0.164062	0.414062	0.055118	0.070866	0.007874	0.007812	0.132812	0.367188	0.75	1	0.078125	0.3125	0.40625	0.445312	0.742188	0.117188	0.46875	0.59375	0.835938	0.945312	0.460938	0.362205	0.039062	0.320312	0.53125	0.71875	0.929688	0.390625
0.364865	0.369369	0.265766	0.264108	0.194131	0.187359	0.018018	0.326577	0.563063	0.822072	1	0.004505	0.191441	0.475225	0.759009	0.995495	0.002252	0.236486	0.441441	0.673423	0.984234	0.457207	0.171171	0.371622	0.054176	0.081264	0.009029	0.002252	0.286036	0.666667	0.880631	1	0.099099	0.297297	0.5	0.677928	0.792793	0.013514	0.198198	0.380631	0.596847	0.954955	0.506757	0.320542	0.013514	0.204955	0.394144	0.646396	0.961712	0.380631
0.304997	0.390006	0.304997	0.224713	0.195977	0.227011	0.001149	0.275129	0.490523	0.7444	0.999426	0.001723	0.210224	0.469845	0.740953	0.998851	0.000574	0.257323	0.536473	0.757611	1	0.548535	0.161401	0.290063	0.071264	0.064368	0.011494	0.000574	0.179782	0.441126	0.741528	1	0.015508	0.31189	0.531304	0.761631	0.995405	0.00919	0.283171	0.57668	0.74842	0.98162	0.487076	0.402299	0.005744	0.247559	0.51637	0.757036	0.998277	0.402642
0.327273	0.327273	0.345455	0.247706	0.247706	0.201835	0.045455	0.2	0.472727	0.672727	0.981818	0.018182	0.272727	0.509091	0.790909	1	0.009091	0.209091	0.536364	0.745455	0.990909	0.454545	0.454545	0.090909	0.174312	0.045872	0.009174	0.009091	0.345455	0.563636	0.818182	1	0.081818	0.181818	0.418182	0.718182	0.981818	0.036364	0.045455	0.072727	0.509091	0.536364	0.490909	0.477064	0.018182	0.272727	0.536364	0.736364	0.990909	0.372727
0.367089	0.299578	0.333333	0.182203	0.237288	0.224576	0.008439	0.223629	0.472574	0.797468	1	0.012658	0.244726	0.514768	0.755274	0.995781	0.004219	0.227848	0.489451	0.675105	0.991561	0.291139	0.042194	0.666667	0.021186	0.088983	0.004237	0.004219	0.392405	0.683544	0.805907	1	0.485232	0.489451	0.662447	0.670886	0.818565	0.012658	0.194093	0.409283	0.624473	0.987342	0.540084	0.372881	0.025316	0.303797	0.493671	0.662447	0.970464	0.362869
0.33526	0.346821	0.317919	0.215116	0.238372	0.215116	0.017341	0.236994	0.450867	0.722543	0.99422	0.011561	0.219653	0.485549	0.745665	0.982659	0.00578	0.242775	0.526012	0.751445	1	0.462428	0.127168	0.410405	0.05814	0.104651	0.023256	0.00578	0.156069	0.595376	0.780347	1	0.283237	0.346821	0.699422	0.745665	0.988439	0.046243	0.312139	0.445087	0.566474	0.930636	0.462428	0.430233	0.023121	0.404624	0.572254	0.710983	0.988439	0.306358
0.363636	0.290909	0.345455	0.259259	0.314815	0.222222	0.036364	0.272727	0.490909	0.745455	1	0.145455	0.254545	0.527273	0.690909	0.890909	0.018182	0.109091	0.418182	0.781818	0.963636	0.418182	0.236364	0.345455	0.092593	0.074074	0	0.109091	0.181818	0.472727	0.654545	1	0.018182	0.054545	0.563636	0.618182	0.981818	0.254545	0.309091	0.4	0.745455	0.836364	0.327273	0.444444	0.054545	0.290909	0.454545	0.8	0.963636	0.309091
0.390244	0.260163	0.349593	0.212245	0.302041	0.17551	0.012195	0.235772	0.48374	0.731707	0.995935	0.00813	0.268293	0.54878	0.821138	1	0.004065	0.239837	0.47561	0.699187	0.979675	0.321138	0.219512	0.45935	0.065306	0.065306	0	0.004065	0.109756	0.443089	0.857724	1	0.04065	0.280488	0.365854	0.772358	0.98374	0.113821	0.231707	0.5	0.682927	0.886179	0.520325	0.44898	0.020325	0.264228	0.556911	0.784553	0.98374	0.272358
0.374408	0.334123	0.291469	0.228029	0.228029	0.213777	0.004739	0.303318	0.514218	0.765403	0.99763	0.007109	0.279621	0.545024	0.741706	0.983412	0.00237	0.177725	0.405213	0.684834	1	0.566351	0.094787	0.338863	0.035629	0.078385	0.007126	0.00237	0.322275	0.594787	0.78673	1	0.049763	0.263033	0.393365	0.471564	0.969194	0.023697	0.116114	0.343602	0.654028	0.995261	0.450237	0.413302	0.018957	0.189573	0.393365	0.64218	0.995261	0.372038
0.33945	0.376147	0.284404	0.225806	0.202765	0.262673	0.041284	0.302752	0.518349	0.779817	1	0.009174	0.233945	0.509174	0.729358	0.986239	0.004587	0.188073	0.46789	0.692661	0.90367	0.440367	0.426606	0.133028	0.119816	0.046083	0	0.004587	0.311927	0.642202	0.848624	1	0.013761	0.288991	0.440367	0.605505	0.834862	0.077982	0.105505	0.233945	0.880734	0.958716	0.422018	0.460829	0.018349	0.270642	0.440367	0.669725	0.894495	0.357798
0.389091	0.4	0.210909	0.306569	0.160584	0.178832	0.007273	0.269091	0.516364	0.752727	0.996364	0.018182	0.250909	0.505455	0.781818	1	0.003636	0.207273	0.450909	0.614545	0.934545	0.494545	0.072727	0.432727	0.043796	0.072993	0	0.003636	0.163636	0.421818	0.810909	1	0.010909	0.083636	0.178182	0.276364	0.418182	0.12	0.429091	0.6	0.709091	0.930909	0.298182	0.306569	0.010909	0.254545	0.512727	0.647273	0.963636	0.385455
0.214953	0.649533	0.135514	0.253521	0.089202	0.131455	0.014019	0.135514	0.299065	0.626168	1	0.009346	0.369159	0.565421	0.733645	0.995327	0.004673	0.116822	0.257009	0.747664	0.976636	0.780374	0.163551	0.056075	0.084507	0.018779	0.00939	0.004673	0.378505	0.574766	0.794393	1	0.046729	0.079439	0.168224	0.280374	0.859813	0.009346	0.018692	0.17757	0.308411	0.32243	0.635514	0.319249	0.023364	0.359813	0.584112	0.761682	0.976636	0.668224
0.485265	0.310413	0.204322	0.281496	0.173228	0.151575	0.009823	0.174853	0.449902	0.75835	1	0.003929	0.330059	0.534381	0.781925	0.994106	0.001965	0.337917	0.485265	0.638507	0.950884	0.638507	0.119843	0.24165	0.05315	0.072835	0.001969	0.001965	0.267191	0.526523	0.774067	1	0.332024	0.428291	0.51277	0.626719	0.943026	0.019646	0.159136	0.373281	0.650295	0.935167	0.273084	0.287402	0.017682	0.385069	0.540275	0.666012	0.962672	0.375246
0.375	0.291667	0.333333	0.221053	0.305263	0.178947	0.020833	0.260417	0.5	0.6875	0.979167	0.03125	0.1875	0.479167	0.791667	0.989583	0.010417	0.229167	0.489583	0.739583	1	0.4375	0.302083	0.260417	0.126316	0.063158	0	0.010417	0.239583	0.635417	0.78125	1	0.260417	0.520833	0.59375	0.822917	0.958333	0.03125	0.145833	0.208333	0.416667	0.489583	0.375	0.442105	0.041667	0.208333	0.479167	0.75	0.96875	0.302083
0.454545	0.222222	0.323232	0.244898	0.357143	0.081633	0.020202	0.252525	0.454545	0.727273	1	0.030303	0.333333	0.565657	0.666667	0.949495	0.010101	0.171717	0.383838	0.777778	0.979798	0.353535	0.272727	0.373737	0.081633	0.061224	0	0.010101	0.080808	0.434343	0.626263	1	0.10101	0.151515	0.525253	0.646465	0.717172	0.242424	0.323232	0.757576	0.848485	0.979798	0.484848	0.428571	0.050505	0.222222	0.555556	0.777778	0.979798	0.161616
0.389474	0.336842	0.273684	0.297872	0.244681	0.191489	0.031579	0.189474	0.463158	0.736842	1	0.021053	0.273684	0.505263	0.757895	0.947368	0.010526	0.231579	0.410526	0.684211	0.978947	0.2	0	0.8	0	0.06383	0	0.010526	0.473684	0.526316	0.789474	1	0	0	0	0	0	0.042105	0.231579	0.431579	0.694737	0.978947	0.305263	0.425532	0.073684	0.326316	0.568421	0.715789	0.978947	0.294737
0.405694	0.362989	0.231317	0.3	0.142857	0.192857	0.02847	0.217082	0.455516	0.686833	0.989324	0.010676	0.24911	0.494662	0.754448	0.978648	0.003559	0.256228	0.604982	0.800712	1	0.587189	0.124555	0.288256	0.057143	0.078571	0	0.003559	0.30605	0.47331	0.711744	1	0.007117	0.601423	0.697509	0.814947	0.978648	0.042705	0.11032	0.252669	0.654804	0.918149	0.320285	0.328571	0.007117	0.256228	0.654804	0.818505	0.992883	0.359431
0.335329	0.377246	0.287425	0.256	0.186	0.228	0.003992	0.275449	0.552894	0.854291	1	0.00998	0.201597	0.403194	0.704591	0.996008	0.001996	0.297405	0.512974	0.700599	0.962076	0.44511	0.157685	0.397206	0.06	0.076	0.004	0.001996	0.115768	0.349301	0.702595	1	0.125749	0.397206	0.562874	0.746507	0.848303	0.0998	0.329341	0.548902	0.858283	0.984032	0.48503	0.328	0.005988	0.301397	0.491018	0.724551	0.924152	0.411178
0.311649	0.461422	0.226929	0.254545	0.14697	0.215152	0.003026	0.267776	0.476551	0.74584	1	0.004539	0.249622	0.529501	0.747352	0.995461	0.001513	0.23298	0.459909	0.738275	0.996974	0.744327	0.125567	0.130106	0.062121	0.040909	0.001515	0.001513	0.29652	0.538578	0.742814	1	0.006051	0.231467	0.461422	0.856278	0.984871	0.055976	0.18003	0.26475	0.670197	0.910741	0.443268	0.336364	0.006051	0.22239	0.512859	0.771558	0.996974	0.458396
0.320388	0.383495	0.296117	0.253659	0.239024	0.214634	0.029126	0.26699	0.480583	0.728155	1	0.009709	0.199029	0.538835	0.868932	0.995146	0.004854	0.262136	0.456311	0.669903	0.864078	0.398058	0.446602	0.15534	0.126829	0.058537	0	0.004854	0.276699	0.558252	0.81068	1	0.019417	0.300971	0.480583	0.621359	0.859223	0.082524	0.116505	0.257282	0.917476	0.990291	0.412621	0.429268	0.024272	0.257282	0.441748	0.65534	0.864078	0.432039
0.351171	0.392977	0.255853	0.234506	0.20268	0.201005	0.003344	0.22408	0.466555	0.759197	1	0.008361	0.29097	0.5301	0.744147	0.994983	0.001672	0.207358	0.493311	0.729097	0.988294	0.525084	0.22408	0.250836	0.092127	0.045226	0.001675	0.001672	0.282609	0.538462	0.747492	1	0.005017	0.204013	0.468227	0.704013	0.906355	0.025084	0.217391	0.505017	0.780936	0.939799	0.436455	0.38861	0.006689	0.252508	0.510033	0.72408	0.989967	0.391304
0.407855	0.29003	0.302115	0.22379	0.241935	0.169355	0.005035	0.283988	0.529708	0.767372	0.998993	0.002014	0.213494	0.48137	0.738167	0.997986	0.001007	0.248741	0.460222	0.736153	1	0.471299	0.145015	0.383686	0.063508	0.085685	0.001008	0.001007	0.260826	0.598187	0.826788	1	0.038268	0.240685	0.524673	0.803625	0.984894	0.014099	0.230614	0.407855	0.632427	0.992951	0.453172	0.395161	0.004028	0.209466	0.444109	0.673716	0.993958	0.328298
0.3475	0.305	0.3475	0.20802	0.245614	0.213033	0.01	0.2775	0.505	0.7875	1	0.0075	0.19	0.43	0.705	0.9975	0.0025	0.2625	0.5225	0.7625	0.985	0.345	0.0925	0.5625	0.0401	0.120301	0.005013	0.0025	0.225	0.425	0.735	1	0.055	0.115	0.1975	0.29	0.36	0.01	0.4	0.5875	0.775	0.985	0.545	0.41604	0.015	0.27	0.4625	0.6975	0.98	0.31
0.380645	0.322581	0.296774	0.230603	0.256466	0.18319	0.008602	0.283871	0.522581	0.772043	0.963441	0.015054	0.24086	0.47957	0.733333	0.997849	0.002151	0.217204	0.494624	0.737634	1	0.354839	0.083871	0.56129	0.032328	0.092672	0.002155	0.002151	0.286022	0.537634	0.789247	1	0.210753	0.27957	0.395699	0.516129	0.597849	0.004301	0.178495	0.486022	0.731183	0.954839	0.541935	0.405172	0.006452	0.260215	0.48172	0.703226	0.995699	0.412903
0.320261	0.427015	0.252723	0.281659	0.172489	0.21179	0.008715	0.285403	0.529412	0.736383	0.991285	0.004357	0.222222	0.509804	0.729847	0.997821	0.002179	0.248366	0.431373	0.808279	1	0.69281	0.067538	0.239651	0.048035	0.052402	0.004367	0.002179	0.222222	0.507625	0.690632	1	0.061002	0.224401	0.446623	0.738562	0.910675	0.008715	0.320261	0.535948	0.91939	0.982571	0.418301	0.414847	0.013072	0.224401	0.427015	0.753813	0.989107	0.433551
0.434343	0.313131	0.252525	0.265306	0.244898	0.132653	0.040404	0.191919	0.444444	0.747475	0.979798	0.020202	0.242424	0.555556	0.767677	1	0.010101	0.30303	0.464646	0.686869	0.949495	0.313131	0	0.686869	0	0.061224	0	0.010101	0.070707	0.151515	0.777778	1	0	0	0	0	0	0.181818	0.343434	0.515152	0.717172	0.969697	0.252525	0.346939	0.181818	0.424242	0.616162	0.727273	0.949495	0.333333
0.37	0.31	0.32	0.20202	0.262626	0.191919	0.1	0.24	0.47	0.69	0.98	0.03	0.21	0.53	0.83	1	0.01	0.22	0.41	0.68	0.97	0.46	0.54	0	0.181818	0	0	0.01	0.3	0.53	0.79	1	0.02	0.19	0.39	0.68	0.96	0	0	0	0	0	0.36	0.505051	0.02	0.2	0.42	0.7	0.97	0.24
0.297189	0.369478	0.333333	0.229839	0.21371	0.258065	0.012048	0.26506	0.574297	0.815261	0.995984	0.008032	0.200803	0.425703	0.690763	1	0.004016	0.248996	0.506024	0.710843	0.951807	0.457831	0.321285	0.220884	0.108871	0.068548	0.004032	0.004016	0.220884	0.457831	0.682731	1	0.024096	0.180723	0.321285	0.526104	0.783133	0.405622	0.662651	0.835341	0.899598	0.955823	0.550201	0.330645	0.028112	0.269076	0.502008	0.706827	0.951807	0.365462
0.463087	0.288591	0.248322	0.236486	0.243243	0.128378	0.013423	0.261745	0.510067	0.838926	1	0.026846	0.201342	0.52349	0.66443	0.986577	0.006711	0.241611	0.449664	0.644295	0.865772	0.422819	0.248322	0.328859	0.128378	0.087838	0.02027	0.006711	0.288591	0.496644	0.731544	1	0.026846	0.348993	0.463087	0.57047	0.838926	0.060403	0.154362	0.657718	0.805369	0.979866	0.315436	0.364865	0.114094	0.302013	0.47651	0.651007	0.946309	0.275168
0.391685	0.40919	0.199125	0.313596	0.16886	0.125	0.010941	0.260394	0.424508	0.63895	0.997812	0.004376	0.33698	0.634573	0.798687	0.978118	0.002188	0.137856	0.310722	0.682713	1	0.689278	0.113786	0.196937	0.054825	0.050439	0.002193	0.002188	0.330416	0.59081	0.785558	1	0.159737	0.310722	0.654267	0.816193	0.989059	0.026258	0.080963	0.21663	0.391685	0.608315	0.396061	0.350877	0.008753	0.183807	0.63895	0.761488	0.989059	0.396061
0.296788	0.424142	0.27907	0.233925	0.149667	0.247228	0.00443	0.251384	0.417497	0.702104	0.993355	0.002215	0.241417	0.500554	0.730897	0.998893	0.001107	0.250277	0.554817	0.790698	1	0.728682	0.135105	0.136213	0.052106	0.043237	0.003326	0.001107	0.231451	0.440753	0.646733	1	0.045404	0.676633	0.787375	0.874862	0.991141	0.003322	0.178295	0.527132	0.82392	0.984496	0.334441	0.330377	0.005537	0.385382	0.677741	0.844961	0.996678	0.459579
0.381526	0.313253	0.305221	0.245968	0.225806	0.205645	0.012048	0.228916	0.445783	0.722892	1	0.008032	0.248996	0.502008	0.702811	0.951807	0.004016	0.269076	0.514056	0.783133	0.995984	0.457831	0.301205	0.240964	0.129032	0.064516	0	0.004016	0.257028	0.485944	0.714859	1	0.116466	0.261044	0.465863	0.73494	0.935743	0.008032	0.084337	0.51004	0.795181	0.987952	0.46988	0.41129	0.02008	0.309237	0.502008	0.738956	0.987952	0.349398
0.328767	0.394521	0.276712	0.252747	0.173077	0.17033	0.005479	0.219178	0.463014	0.726027	1	0.016438	0.252055	0.542466	0.805479	0.989041	0.00274	0.30137	0.479452	0.673973	0.994521	0.545205	0.189041	0.265753	0.07967	0.074176	0.002747	0.00274	0.249315	0.536986	0.772603	1	0.035616	0.391781	0.512329	0.641096	0.936986	0.005479	0.139726	0.276712	0.789041	0.917808	0.471233	0.368132	0.010959	0.345205	0.515068	0.715068	0.994521	0.405479
0.416244	0.22335	0.360406	0.183673	0.270408	0.153061	0.015228	0.19797	0.431472	0.705584	1	0.010152	0.208122	0.548223	0.720812	0.994924	0.005076	0.335025	0.532995	0.77665	0.989848	0.492386	0.152284	0.35533	0.061224	0.081633	0.020408	0.005076	0.15736	0.527919	0.730964	1	0.238579	0.274112	0.614213	0.715736	0.989848	0.040609	0.350254	0.461929	0.756345	0.959391	0.461929	0.418367	0.020305	0.340102	0.51269	0.675127	0.989848	0.192893
0.375	0.367647	0.257353	0.281481	0.177778	0.2	0.022059	0.205882	0.389706	0.654412	0.992647	0.036765	0.235294	0.558824	0.816176	1	0.007353	0.286765	0.477941	0.698529	0.948529	0.316176	0.007353	0.676471	0.014815	0.074074	0	0.007353	0.176471	0.647059	0.911765	1	0.977941	0.977941	0.977941	0.977941	0.977941	0.058824	0.272059	0.441176	0.683824	0.867647	0.411765	0.459259	0.029412	0.308824	0.492647	0.691176	0.926471	0.352941
0.315011	0.422833	0.262156	0.269068	0.152542	0.252119	0.014799	0.160677	0.418605	0.687104	1	0.004228	0.287526	0.54334	0.805497	0.995772	0.002114	0.293869	0.545455	0.729387	0.991543	0.632135	0.164905	0.20296	0.055085	0.038136	0	0.002114	0.188161	0.526427	0.841438	1	0.065539	0.289641	0.458774	0.649049	0.786469	0.084567	0.312896	0.51797	0.682875	0.82241	0.450317	0.322034	0.021142	0.319239	0.556025	0.818182	0.97463	0.427061
0.341646	0.260599	0.397756	0.167291	0.259675	0.224719	0.002494	0.25187	0.507481	0.761845	0.996259	0.004988	0.24813	0.473815	0.716958	0.988778	0.001247	0.238155	0.508728	0.760599	1	0.470075	0.233167	0.296758	0.093633	0.053683	0.001248	0.001247	0.234414	0.456359	0.738155	1	0.037406	0.195761	0.418953	0.811721	0.992519	0.006234	0.317955	0.538653	0.697007	0.985037	0.573566	0.409488	0.003741	0.259352	0.471322	0.721945	0.997506	0.279302
0.333333	0.340476	0.32619	0.24105	0.236277	0.238663	0.009524	0.311905	0.545238	0.780952	0.995238	0.004762	0.192857	0.464286	0.709524	1	0.002381	0.235714	0.480952	0.747619	0.997619	0.354762	0.133333	0.511905	0.073986	0.102625	0.00716	0.002381	0.207143	0.535714	0.790476	1	0.078571	0.283333	0.52619	0.92619	0.997619	0.007143	0.254762	0.469048	0.707143	0.95	0.595238	0.377088	0.011905	0.242857	0.466667	0.683333	0.997619	0.364286
0.392593	0.325926	0.281481	0.268657	0.238806	0.19403	0.014815	0.162963	0.37037	0.666667	0.992593	0.02963	0.348148	0.6	0.844444	0.977778	0.007407	0.259259	0.533333	0.733333	1	0.348148	0.2	0.451852	0.074627	0.074627	0	0.007407	0.140741	0.451852	0.77037	1	0.318519	0.355556	0.42963	0.511111	0.866667	0.037037	0.192593	0.57037	0.725926	0.962963	0.42963	0.298507	0.022222	0.340741	0.503704	0.8	0.985185	0.340741
0.31069	0.486637	0.202673	0.270903	0.136009	0.16165	0.002227	0.202673	0.435412	0.667038	1	0.003341	0.357461	0.64922	0.835189	0.998886	0.001114	0.167038	0.309577	0.514477	0.994432	0.683742	0.08686	0.229399	0.037904	0.037904	0.00223	0.001114	0.387528	0.636971	0.827394	1	0.005568	0.115813	0.188196	0.492205	0.875278	0.02784	0.150334	0.280624	0.430958	0.654788	0.518931	0.309922	0.004454	0.262806	0.514477	0.761693	0.998886	0.466592
0.438776	0.255102	0.306122	0.268041	0.309278	0.123711	0.030612	0.193878	0.530612	0.714286	0.989796	0.081633	0.295918	0.428571	0.673469	0.979592	0.010204	0.22449	0.469388	0.755102	1	0.459184	0.408163	0.132653	0.092784	0.051546	0.010309	0.010204	0.193878	0.602041	0.714286	1	0.204082	0.336735	0.5	0.72449	0.908163	0.061224	0.081633	0.132653	0.918367	0.959184	0.336735	0.453608	0.040816	0.27551	0.44898	0.734694	0.969388	0.234694
0.34507	0.302817	0.352113	0.241135	0.22695	0.212766	0.035211	0.21831	0.464789	0.647887	0.957746	0.014085	0.267606	0.577465	0.823944	0.985915	0.007042	0.197183	0.450704	0.732394	1	0.380282	0.352113	0.267606	0.163121	0.049645	0.007092	0.007042	0.316901	0.556338	0.732394	1	0.169014	0.422535	0.577465	0.816901	0.992958	0.042254	0.098592	0.232394	0.295775	0.922535	0.478873	0.347518	0.035211	0.253521	0.612676	0.809859	1	0.316901
0.396694	0.198347	0.404959	0.175	0.308333	0.183333	0.016529	0.214876	0.495868	0.694215	0.983471	0.049587	0.280992	0.454545	0.793388	1	0.008264	0.247934	0.479339	0.743802	0.991736	0.214876	0.173554	0.61157	0.066667	0.1	0.016667	0.008264	0.082645	0.396694	0.793388	1	0.024793	0.330579	0.413223	0.743802	0.85124	0.090909	0.231405	0.545455	0.719008	0.983471	0.53719	0.45	0.024793	0.247934	0.454545	0.752066	0.966942	0.157025
0.348457	0.350272	0.30127	0.250909	0.201818	0.218182	0.016334	0.274047	0.551724	0.818512	1	0.00363	0.235935	0.517241	0.738657	0.99274	0.001815	0.23049	0.441016	0.656987	0.99637	0.479129	0.07078	0.450091	0.023636	0.081818	0.005455	0.001815	0.263158	0.642468	0.836661	1	0.056261	0.07078	0.190563	0.566243	0.764065	0.005445	0.299456	0.46098	0.624319	0.989111	0.515426	0.309091	0.00726	0.235935	0.466425	0.646098	0.99637	0.388385
0.438017	0.280992	0.280992	0.283333	0.233333	0.133333	0.016529	0.239669	0.504132	0.694215	0.991736	0.024793	0.231405	0.454545	0.809917	0.975207	0.008264	0.190083	0.53719	0.710744	1	0.429752	0.157025	0.413223	0.041667	0.075	0.008333	0.008264	0.190083	0.355372	0.768595	1	0.256198	0.280992	0.38843	0.429752	0.735537	0.066116	0.446281	0.570248	0.801653	0.909091	0.454545	0.366667	0.041322	0.305785	0.528926	0.719008	0.966942	0.322314
0.333333	0.373984	0.292683	0.270492	0.172131	0.262295	0.02439	0.219512	0.422764	0.682927	0.99187	0.03252	0.243902	0.552846	0.780488	1	0.00813	0.317073	0.528455	0.764228	0.98374	0.235772	0	0.764228	0	0.081967	0	0.00813	0.056911	0.227642	0.715447	1	0	0	0	0	0	0.065041	0.300813	0.495935	0.764228	0.97561	0.430894	0.459016	0.03252	0.325203	0.528455	0.739837	0.95122	0.349593
0.260274	0.452055	0.287671	0.21978	0.181319	0.244505	0.005479	0.210959	0.441096	0.750685	0.980822	0.008219	0.290411	0.550685	0.747945	1	0.00274	0.205479	0.435616	0.706849	0.991781	0.539726	0.2	0.260274	0.082418	0.038462	0	0.00274	0.290411	0.542466	0.712329	1	0.032877	0.134247	0.309589	0.79726	0.926027	0.09589	0.216438	0.449315	0.865753	0.99726	0.468493	0.39011	0.038356	0.276712	0.506849	0.720548	0.972603	0.468493
0.30303	0.400932	0.296037	0.261682	0.186916	0.247664	0.006993	0.268065	0.515152	0.780886	0.993007	0.004662	0.205128	0.459207	0.731935	0.997669	0.002331	0.272727	0.51049	0.724942	1	0.386946	0.090909	0.522145	0.035047	0.114486	0.002336	0.002331	0.228438	0.454545	0.685315	1	0.048951	0.104895	0.181818	0.223776	0.344988	0.013986	0.389277	0.594406	0.804196	0.993007	0.599068	0.411215	0.009324	0.261072	0.477855	0.729604	0.995338	0.435897
0.294698	0.40074	0.304562	0.253086	0.164198	0.244444	0.003699	0.268804	0.521578	0.734895	0.995068	0.002466	0.22688	0.491985	0.745993	1	0.001233	0.250308	0.489519	0.763255	0.998767	0.442663	0.187423	0.369914	0.080247	0.07284	0.003704	0.001233	0.297164	0.532676	0.786683	1	0.003699	0.173859	0.414303	0.875462	0.991369	0.023428	0.241677	0.484587	0.614057	0.95561	0.520345	0.402469	0.004932	0.244143	0.452528	0.691739	0.996301	0.418002
0.285211	0.419014	0.295775	0.226148	0.169611	0.250883	0.010563	0.21831	0.447183	0.757042	0.989437	0.007042	0.239437	0.475352	0.760563	1	0.003521	0.257042	0.507042	0.721831	0.996479	0.390845	0.172535	0.43662	0.04947	0.09894	0	0.003521	0.190141	0.454225	0.704225	1	0.169014	0.323944	0.443662	0.644366	0.735915	0.021127	0.232394	0.528169	0.834507	0.996479	0.538732	0.416961	0.017606	0.235915	0.475352	0.661972	0.996479	0.457746
0.331288	0.323108	0.345603	0.196721	0.221311	0.239754	0.00818	0.155419	0.453988	0.744376	0.997955	0.00409	0.267894	0.476483	0.762781	1	0.002045	0.306748	0.535787	0.725971	0.989775	0.486708	0.167689	0.345603	0.063525	0.071721	0.006148	0.002045	0.128834	0.321063	0.650307	1	0.014315	0.425358	0.631902	0.764826	0.9182	0.01227	0.382413	0.560327	0.785276	0.99182	0.523517	0.364754	0.006135	0.333333	0.525562	0.766871	0.97955	0.359918
0.302041	0.412245	0.285714	0.237705	0.20082	0.221311	0.020408	0.191837	0.42449	0.75102	1	0.008163	0.244898	0.485714	0.714286	0.995918	0.004082	0.289796	0.567347	0.771429	0.991837	0.485714	0.257143	0.257143	0.07377	0.065574	0	0.004082	0.232653	0.379592	0.677551	1	0.089796	0.187755	0.497959	0.673469	0.820408	0.012245	0.461224	0.722449	0.902041	0.987755	0.595918	0.344262	0.016327	0.306122	0.530612	0.722449	0.991837	0.440816
0.413793	0.275862	0.310345	0.207921	0.287129	0.20297	0.014778	0.231527	0.497537	0.763547	0.995074	0.068966	0.261084	0.502463	0.729064	1	0.004926	0.226601	0.463054	0.714286	0.955665	0.433498	0.438424	0.128079	0.118812	0.039604	0	0.004926	0.285714	0.576355	0.837438	1	0.009852	0.305419	0.463054	0.635468	0.881773	0.078818	0.103448	0.241379	0.660099	0.955665	0.428571	0.435644	0.014778	0.236453	0.44335	0.674877	0.8867	0.295567
0.294671	0.46395	0.241379	0.27044	0.147799	0.213836	0.009404	0.188088	0.470219	0.717868	1	0.00627	0.200627	0.45768	0.755486	0.996865	0.003135	0.360502	0.570533	0.777429	0.978056	0.489028	0.153605	0.357367	0.044025	0.069182	0	0.003135	0.122257	0.341693	0.69906	1	0.275862	0.423197	0.485893	0.658307	0.739812	0.184953	0.369906	0.586207	0.830721	0.968652	0.485893	0.358491	0.012539	0.322884	0.526646	0.702194	0.968652	0.460815
0.42602	0.318878	0.255102	0.273657	0.255754	0.150895	0.005102	0.298469	0.528061	0.719388	1	0.012755	0.191327	0.461735	0.778061	0.997449	0.002551	0.242347	0.459184	0.762755	0.984694	0.443878	0.114796	0.441327	0.066496	0.056266	0.01023	0.002551	0.265306	0.520408	0.831633	1	0.012755	0.403061	0.788265	0.857143	0.987245	0.109694	0.227041	0.346939	0.630102	0.956633	0.298469	0.378517	0.010204	0.178571	0.390306	0.72449	0.984694	0.352041
0.369674	0.240602	0.389724	0.151819	0.301129	0.194479	0.002506	0.25188	0.494987	0.766917	1	0.017544	0.263158	0.515038	0.73183	0.97995	0.001253	0.229323	0.47995	0.745614	0.997494	0.461153	0.243108	0.295739	0.096612	0.053952	0.003764	0.001253	0.234336	0.45614	0.740602	1	0.038847	0.199248	0.418546	0.799499	0.997494	0.006266	0.323308	0.570175	0.704261	0.992481	0.568922	0.391468	0.003759	0.260652	0.472431	0.738095	0.997494	0.270677
0.403226	0.33871	0.258065	0.275676	0.194595	0.221622	0.016129	0.22043	0.505376	0.817204	1	0.010753	0.236559	0.456989	0.715054	0.973118	0.005376	0.344086	0.516129	0.72043	0.983871	0.333333	0.11828	0.548387	0.07027	0.07027	0.005405	0.005376	0.112903	0.446237	0.693548	1	0.043011	0.064516	0.473118	0.763441	0.822581	0.188172	0.317204	0.564516	0.844086	0.983871	0.408602	0.4	0.048387	0.408602	0.553763	0.752688	0.983871	0.360215
0.353712	0.371179	0.275109	0.219298	0.197368	0.201754	0.0131	0.174672	0.471616	0.768559	1	0.008734	0.218341	0.414847	0.68559	0.978166	0.004367	0.393013	0.580786	0.772926	0.9869	0.572052	0.270742	0.157205	0.083333	0.030702	0.004386	0.004367	0.231441	0.436681	0.759825	1	0.253275	0.449782	0.554585	0.812227	0.991266	0.117904	0.152838	0.19214	0.606987	0.847162	0.454148	0.359649	0.135371	0.318777	0.558952	0.746725	0.9869	0.393013
0.337748	0.342715	0.319536	0.21393	0.217247	0.218905	0.006623	0.173841	0.483444	0.738411	0.993377	0.003311	0.256623	0.471854	0.753311	1	0.001656	0.311258	0.52649	0.75	0.998344	0.465232	0.157285	0.377483	0.058043	0.087894	0.004975	0.001656	0.149007	0.400662	0.642384	1	0.004967	0.39404	0.629139	0.726821	0.895695	0.062914	0.326159	0.562914	0.799669	0.996689	0.518212	0.361526	0.004967	0.307947	0.5	0.751656	0.998344	0.360927
0.331019	0.354167	0.314815	0.213457	0.232019	0.218097	0.006944	0.226852	0.467593	0.770833	0.99537	0.00463	0.282407	0.50463	0.747685	0.997685	0.002315	0.231481	0.483796	0.722222	1	0.555556	0.24537	0.199074	0.083527	0.041763	0	0.002315	0.256944	0.49537	0.752315	1	0.016204	0.231481	0.400463	0.729167	0.988426	0.043981	0.266204	0.525463	0.696759	0.953704	0.444444	0.37587	0.011574	0.247685	0.497685	0.699074	0.988426	0.347222
0.39823	0.348673	0.253097	0.237589	0.161348	0.159574	0.00531	0.306195	0.646018	0.861947	1	0.00354	0.20708	0.460177	0.715044	0.99115	0.00177	0.235398	0.40708	0.575221	0.943363	0.60354	0.166372	0.230088	0.051418	0.065603	0.005319	0.00177	0.307965	0.688496	0.838938	1	0.00531	0.215929	0.338053	0.578761	0.642478	0.030088	0.230088	0.4	0.486726	0.906195	0.361062	0.283688	0.00708	0.20708	0.366372	0.523894	0.688496	0.380531
0.20283	0.584906	0.212264	0.186761	0.104019	0.219858	0.018868	0.15566	0.308962	0.455189	1	0.004717	0.391509	0.629717	0.799528	0.997642	0.002358	0.17217	0.34434	0.582547	0.995283	0.721698	0.125	0.153302	0.042553	0.047281	0	0.002358	0.398585	0.629717	0.818396	1	0.033019	0.108491	0.20283	0.308962	0.412736	0.018868	0.153302	0.28066	0.436321	0.775943	0.603774	0.335697	0.03066	0.339623	0.601415	0.778302	0.995283	0.549528
0.415929	0.19469	0.389381	0.116071	0.303571	0.169643	0.026549	0.185841	0.442478	0.752212	1	0.017699	0.221239	0.477876	0.654867	0.814159	0.00885	0.265487	0.566372	0.778761	0.955752	0.371681	0.221239	0.40708	0.107143	0.053571	0	0.00885	0.19469	0.353982	0.752212	1	0.035398	0.247788	0.362832	0.707965	0.831858	0.097345	0.442478	0.548673	0.876106	0.982301	0.469027	0.428571	0.035398	0.274336	0.477876	0.725664	0.955752	0.221239
0.4	0.314286	0.285714	0.318841	0.246377	0.173913	0.042857	0.342857	0.642857	0.828571	1	0.028571	0.171429	0.442857	0.628571	0.985714	0.014286	0.142857	0.414286	0.614286	0.9	0.457143	0.171429	0.371429	0.144928	0.086957	0	0.014286	0.157143	0.342857	0.628571	1	0.042857	0.085714	0.3	0.414286	0.457143	0.5	0.571429	0.785714	0.871429	0.971429	0.357143	0.434783	0.057143	0.214286	0.328571	0.571429	0.9	0.342857
0.330882	0.492647	0.176471	0.266667	0.103704	0.185185	0.014706	0.360294	0.507353	0.639706	0.992647	0.022059	0.257353	0.595588	0.838235	1	0.007353	0.183824	0.264706	0.492647	0.985294	0.852941	0.102941	0.044118	0.074074	0.02963	0	0.007353	0.301471	0.522059	0.779412	1	0.191176	0.205882	0.242647	0.272059	0.911765	0.610294	0.610294	0.639706	0.647059	0.661765	0.205882	0.207407	0.058824	0.220588	0.272059	0.463235	0.985294	0.522059
0.407895	0.388158	0.203947	0.337748	0.15894	0.165563	0.013158	0.210526	0.460526	0.657895	1	0.026316	0.263158	0.539474	0.789474	0.967105	0.006579	0.164474	0.447368	0.730263	0.947368	0.467105	0.052632	0.480263	0.02649	0.10596	0	0.006579	0.256579	0.467105	0.651316	1	0.197368	0.203947	0.217105	0.486842	0.5	0.032895	0.184211	0.565789	0.855263	0.980263	0.388158	0.357616	0.052632	0.289474	0.605263	0.835526	0.940789	0.388158
0.333503	0.322318	0.344179	0.20295	0.232452	0.231943	0.002034	0.23335	0.474835	0.738688	0.998475	0.001017	0.252161	0.516014	0.748856	1	0.000508	0.262837	0.513981	0.75089	0.999492	0.404677	0.149975	0.445348	0.055443	0.085961	0.003561	0.000508	0.222166	0.512456	0.759532	1	0.002542	0.316726	0.551093	0.770208	0.999492	0.005592	0.259786	0.459583	0.723945	0.930859	0.563803	0.375381	0.002542	0.279105	0.509405	0.744281	0.999492	0.341129
0.358779	0.305344	0.335878	0.223077	0.238462	0.246154	0.076336	0.335878	0.519084	0.778626	0.938931	0.022901	0.19084	0.412214	0.755725	1	0.007634	0.21374	0.442748	0.687023	0.992366	0.458015	0.137405	0.40458	0.046154	0.092308	0	0.007634	0.19084	0.351145	0.748092	1	0.259542	0.282443	0.381679	0.412214	0.694656	0.076336	0.465649	0.564885	0.78626	0.89313	0.419847	0.323077	0.053435	0.29771	0.503817	0.679389	0.954198	0.274809
0.349169	0.380048	0.270784	0.238095	0.209524	0.209524	0.007126	0.204276	0.434679	0.736342	0.997625	0.004751	0.301663	0.510689	0.745843	0.985748	0.002375	0.270784	0.534442	0.750594	1	0.551069	0.12114	0.327791	0.069048	0.097619	0.007143	0.002375	0.304038	0.527316	0.795724	1	0.199525	0.4038	0.672209	0.824228	0.997625	0.014252	0.168646	0.339667	0.700713	0.961995	0.427553	0.461905	0.009501	0.32304	0.513064	0.750594	0.990499	0.413302
0.316312	0.419858	0.26383	0.235795	0.176136	0.203125	0.002837	0.2	0.492199	0.741844	0.998582	0.004255	0.249645	0.476596	0.780142	1	0.001418	0.286525	0.539007	0.73617	0.982979	0.607092	0.15461	0.238298	0.066761	0.066761	0.007102	0.001418	0.228369	0.446809	0.780142	1	0.038298	0.324823	0.631206	0.714894	0.98156	0.008511	0.248227	0.519149	0.726241	0.950355	0.507801	0.440341	0.009929	0.273759	0.52766	0.734752	0.984397	0.41844
0.411765	0.285714	0.302521	0.271186	0.245763	0.169492	0.042017	0.252101	0.546218	0.697479	1	0.02521	0.243697	0.521008	0.789916	0.941176	0.008403	0.210084	0.420168	0.722689	0.983193	0.428571	0.243697	0.327731	0.084746	0.067797	0	0.008403	0.184874	0.462185	0.647059	1	0.243697	0.294118	0.394958	0.470588	0.554622	0.067227	0.134454	0.747899	0.865546	0.983193	0.411765	0.474576	0.05042	0.268908	0.478992	0.739496	0.97479	0.327731
0.454545	0.215909	0.329545	0.218391	0.252874	0.172414	0.034091	0.215909	0.465909	0.693182	1	0.022727	0.079545	0.431818	0.738636	0.954545	0.011364	0.318182	0.545455	0.75	0.988636	0.147727	0.022727	0.829545	0.022989	0.068966	0	0.011364	0.034091	0.477273	0.738636	1	0.761364	0.761364	0.761364	0.761364	0.772727	0.056818	0.25	0.454545	0.693182	0.988636	0.318182	0.436782	0.079545	0.352273	0.579545	0.738636	0.977273	0.238636
0.329258	0.380786	0.289956	0.246503	0.181818	0.222028	0.004367	0.230568	0.510044	0.719651	0.998253	0.001747	0.273362	0.50393	0.777293	0.999127	0.000873	0.256769	0.478603	0.737991	1	0.464629	0.126638	0.408734	0.050699	0.082168	0.003497	0.000873	0.215721	0.50131	0.761572	1	0.039301	0.28821	0.396507	0.669869	0.988646	0.020087	0.259389	0.527511	0.764192	0.99738	0.526638	0.358392	0.017467	0.254148	0.468996	0.71441	0.993886	0.401747
0.341463	0.333333	0.325203	0.195918	0.24898	0.228571	0.012195	0.231707	0.430894	0.788618	1	0.00813	0.207317	0.54065	0.715447	0.995935	0.004065	0.308943	0.52439	0.752033	0.97561	0.49187	0.256098	0.252033	0.081633	0.065306	0.008163	0.004065	0.227642	0.378049	0.678862	1	0.03252	0.178862	0.49187	0.666667	0.817073	0.01626	0.471545	0.731707	0.898374	0.987805	0.573171	0.310204	0.01626	0.304878	0.528455	0.703252	0.987805	0.341463
0.368056	0.361111	0.270833	0.265734	0.20979	0.174825	0.020833	0.256944	0.534722	0.736111	0.965278	0.041667	0.201389	0.368056	0.597222	1	0.006944	0.388889	0.611111	0.833333	0.993056	0.631944	0.1875	0.180556	0.062937	0.062937	0.006993	0.006944	0.166667	0.326389	0.513889	1	0.131944	0.548611	0.805556	0.875	0.923611	0.027778	0.5625	0.666667	0.9375	0.986111	0.409722	0.405594	0.027778	0.284722	0.4375	0.729167	0.979167	0.375
0.363014	0.363014	0.273973	0.310345	0.213793	0.17931	0.020548	0.253425	0.554795	0.753425	0.993151	0.013699	0.212329	0.410959	0.719178	1	0.006849	0.267123	0.486301	0.726027	0.90411	0.527397	0.130137	0.342466	0.041379	0.096552	0	0.006849	0.143836	0.369863	0.671233	1	0.260274	0.280822	0.452055	0.712329	0.746575	0.10274	0.513699	0.616438	0.815068	0.917808	0.39726	0.275862	0.068493	0.273973	0.554795	0.712329	0.924658	0.424658
0.313576	0.414914	0.271511	0.247126	0.166667	0.222222	0.007648	0.258126	0.48566	0.739962	0.99044	0.003824	0.225621	0.491396	0.764818	1	0.001912	0.263862	0.527725	0.726577	0.998088	0.669216	0.152964	0.17782	0.061303	0.05364	0	0.001912	0.246654	0.535373	0.808795	1	0.00956	0.208413	0.374761	0.608031	0.996176	0.128107	0.342256	0.483748	0.694073	0.982792	0.479924	0.321839	0.005736	0.3174	0.602294	0.814532	0.998088	0.409178
0.338583	0.330709	0.330709	0.26087	0.221344	0.245059	0.019685	0.208661	0.409449	0.73622	0.988189	0.007874	0.334646	0.551181	0.779528	0.992126	0.003937	0.212598	0.492126	0.720472	1	0.338583	0	0.661417	0	0.118577	0	0.003937	0.397638	0.570866	0.748031	1	0	0	0	0	0	0.019685	0.19685	0.456693	0.740157	0.996063	0.559055	0.379447	0.011811	0.279528	0.527559	0.720472	0.984252	0.354331
0.357542	0.368715	0.273743	0.258427	0.207865	0.213483	0.01676	0.268156	0.513966	0.726257	1	0.011173	0.273743	0.547486	0.821229	0.988827	0.005587	0.167598	0.407821	0.648045	0.994413	0.368715	0.078212	0.553073	0.033708	0.101124	0	0.005587	0.089385	0.463687	0.765363	1	0.402235	0.413408	0.435754	0.469274	0.502793	0.117318	0.26257	0.558659	0.75419	0.977654	0.469274	0.393258	0.039106	0.256983	0.530726	0.748603	0.977654	0.357542
0.347826	0.365217	0.286957	0.307018	0.201754	0.210526	0.043478	0.217391	0.495652	0.747826	0.982609	0.017391	0.191304	0.469565	0.756522	1	0.008696	0.278261	0.504348	0.66087	0.991304	0.504348	0.234783	0.26087	0.096491	0.061404	0.008772	0.008696	0.121739	0.434783	0.773913	1	0.391304	0.6	0.66087	0.843478	0.947826	0.173913	0.226087	0.347826	0.521739	0.965217	0.330435	0.368421	0.130435	0.278261	0.530435	0.66087	0.965217	0.373913
0.423977	0.366959	0.209064	0.282577	0.174231	0.143485	0.002924	0.296784	0.565789	0.802632	0.995614	0.019006	0.269006	0.581871	0.77924	1	0.001462	0.140351	0.326023	0.498538	0.994152	0.618421	0.149123	0.232456	0.04978	0.038067	0.008785	0.001462	0.384503	0.668129	0.828947	1	0.00731	0.102339	0.23538	0.438596	0.80848	0.116959	0.27193	0.337719	0.52193	0.983918	0.423977	0.351391	0.005848	0.194444	0.393275	0.593567	0.99269	0.378655
0.366038	0.320755	0.313208	0.265152	0.208333	0.204545	0.007547	0.264151	0.539623	0.754717	1	0.011321	0.203774	0.430189	0.701887	0.984906	0.003774	0.260377	0.471698	0.732075	0.981132	0.388679	0.090566	0.520755	0.034091	0.102273	0.003788	0.003774	0.09434	0.34717	0.74717	1	0.211321	0.777358	0.826415	0.849057	0.879245	0.109434	0.309434	0.49434	0.645283	0.988679	0.498113	0.363636	0.022642	0.279245	0.471698	0.698113	0.981132	0.335849
0.363636	0.46281	0.173554	0.4	0.141667	0.1	0.016529	0.280992	0.570248	0.760331	1	0.033058	0.330579	0.578512	0.818182	0.991736	0.008264	0.132231	0.256198	0.347107	0.702479	0.61157	0.173554	0.214876	0.083333	0.066667	0	0.008264	0.231405	0.553719	0.842975	1	0.090909	0.123967	0.198347	0.280992	0.413223	0.454545	0.495868	0.694215	0.743802	0.809917	0.247934	0.266667	0.041322	0.181818	0.305785	0.371901	0.77686	0.487603
0.259542	0.381679	0.358779	0.215385	0.215385	0.284615	0.022901	0.167939	0.412214	0.618321	0.954198	0.015267	0.274809	0.610687	0.80916	1	0.007634	0.244275	0.465649	0.732824	0.992366	0.381679	0.343511	0.274809	0.176923	0.053846	0.007692	0.007634	0.328244	0.549618	0.717557	1	0.175573	0.381679	0.580153	0.80916	0.992366	0.038168	0.099237	0.251908	0.687023	0.916031	0.48855	0.430769	0.030534	0.267176	0.580153	0.78626	0.992366	0.335878
0.344	0.31	0.346	0.208417	0.272545	0.218437	0.018	0.234	0.462	0.758	0.998	0.004	0.246	0.492	0.722	1	0.002	0.268	0.526	0.742	0.996	0.344	0.1	0.556	0.044088	0.108216	0.004008	0.002	0.198	0.41	0.664	1	0.008	0.176	0.224	0.296	0.996	0.014	0.398	0.59	0.79	0.984	0.548	0.44489	0.004	0.27	0.476	0.728	0.996	0.324
0.331126	0.331126	0.337748	0.246667	0.22	0.213333	0.013245	0.231788	0.443709	0.695364	0.993377	0.05298	0.225166	0.456954	0.688742	1	0.006623	0.245033	0.543046	0.794702	0.97351	0.370861	0.298013	0.331126	0.126667	0.046667	0.006667	0.006623	0.145695	0.562914	0.774834	1	0.013245	0.238411	0.596026	0.860927	0.960265	0.165563	0.317881	0.403974	0.483444	0.807947	0.384106	0.466667	0.019868	0.198675	0.523179	0.721854	0.953642	0.377483
0.364395	0.378303	0.257302	0.274373	0.193593	0.190808	0.009736	0.272601	0.545202	0.746871	0.998609	0.002782	0.289291	0.54242	0.788595	0.995828	0.001391	0.171071	0.382476	0.655076	1	0.694019	0.1363	0.16968	0.061281	0.041783	0.005571	0.001391	0.388039	0.625869	0.803894	1	0.004172	0.107093	0.230876	0.453408	0.973574	0.026426	0.161335	0.262865	0.411683	0.956885	0.577191	0.384401	0.004172	0.286509	0.568846	0.783032	0.997218	0.393602
0.394737	0.381579	0.223684	0.298013	0.15894	0.178808	0.013158	0.243421	0.565789	0.809211	1	0.019737	0.256579	0.460526	0.782895	0.993421	0.006579	0.184211	0.427632	0.605263	0.901316	0.407895	0.217105	0.375	0.059603	0.099338	0.019868	0.006579	0.309211	0.664474	0.881579	1	0.019737	0.092105	0.342105	0.434211	0.644737	0.144737	0.230263	0.552632	0.730263	0.907895	0.375	0.317881	0.046053	0.184211	0.381579	0.552632	0.717105	0.375
0.478723	0.297872	0.223404	0.290323	0.204301	0.129032	0.031915	0.180851	0.425532	0.744681	0.989362	0.021277	0.276596	0.62766	0.765957	1	0.010638	0.297872	0.468085	0.617021	0.925532	0.148936	0.021277	0.829787	0.021505	0.064516	0	0.010638	0.031915	0.457447	0.702128	1	0.712766	0.712766	0.712766	0.712766	0.723404	0.053191	0.244681	0.489362	0.765957	0.978723	0.319149	0.430108	0.074468	0.297872	0.542553	0.712766	0.925532	0.234043
0.236273	0.544093	0.219634	0.191667	0.115	0.213333	0.013311	0.207987	0.396007	0.640599	0.995008	0.003328	0.294509	0.559068	0.748752	1	0.001664	0.237937	0.439268	0.78203	0.998336	0.745424	0.129784	0.124792	0.053333	0.023333	0.01	0.001664	0.292845	0.562396	0.753744	1	0.006656	0.221298	0.356073	0.916805	0.996672	0.008319	0.141431	0.27787	0.420965	0.988353	0.613977	0.326667	0.004992	0.279534	0.514143	0.730449	0.998336	0.560732
0.403756	0.333333	0.262911	0.259434	0.254717	0.15566	0.014085	0.267606	0.492958	0.741784	1	0.00939	0.183099	0.408451	0.690141	0.995305	0.004695	0.319249	0.58216	0.779343	0.985915	0.488263	0.173709	0.338028	0.061321	0.070755	0.023585	0.004695	0.15493	0.516432	0.723005	1	0.230047	0.483568	0.638498	0.943662	0.99061	0.037559	0.328638	0.42723	0.737089	0.924883	0.460094	0.424528	0.018779	0.342723	0.502347	0.70892	0.985915	0.328638
0.313433	0.447761	0.238806	0.227273	0.212121	0.19697	0.029851	0.343284	0.507463	0.850746	1	0.044776	0.19403	0.402985	0.686567	0.985075	0.014925	0.238806	0.462687	0.58209	0.910448	0.522388	0.343284	0.134328	0.151515	0.030303	0	0.014925	0.119403	0.402985	0.626866	1	0.164179	0.223881	0.447761	0.641791	0.776119	0.850746	0.865672	0.895522	0.925373	0.970149	0.402985	0.484848	0.074627	0.238806	0.522388	0.641791	0.970149	0.447761
0.32439	0.346341	0.329268	0.200244	0.238095	0.234432	0.002439	0.273171	0.55122	0.787805	1	0.004878	0.218293	0.45122	0.709756	0.996341	0.00122	0.260976	0.507317	0.752439	0.99878	0.468293	0.242683	0.289024	0.107448	0.051282	0.002442	0.00122	0.210976	0.464634	0.740244	1	0.037805	0.202439	0.420732	0.80122	0.99878	0.006098	0.32439	0.541463	0.702439	0.992683	0.559756	0.398046	0.003659	0.265854	0.47439	0.74878	0.99878	0.371951
0.266541	0.429112	0.304348	0.179924	0.176136	0.285985	0.017013	0.362949	0.553875	0.814745	0.99811	0.003781	0.155009	0.398866	0.697543	0.996219	0.00189	0.289225	0.514178	0.725898	1	0.627599	0.204159	0.168242	0.079545	0.034091	0	0.00189	0.166352	0.431002	0.729679	1	0.056711	0.345936	0.523629	0.741021	0.94896	0.241966	0.413989	0.640832	0.763705	0.886578	0.483932	0.337121	0.022684	0.192817	0.444234	0.705104	0.990548	0.425331
0.314286	0.360714	0.325	0.193548	0.172043	0.225806	0.010714	0.232143	0.478571	0.810714	0.989286	0.021429	0.239286	0.464286	0.707143	1	0.003571	0.264286	0.517857	0.757143	0.996429	0.378571	0.175	0.446429	0.050179	0.09319	0	0.003571	0.2	0.442857	0.689286	1	0.175	0.342857	0.428571	0.632143	0.725	0.014286	0.228571	0.525	0.835714	0.992857	0.539286	0.394265	0.032143	0.257143	0.475	0.675	0.992857	0.396429
0.351946	0.368866	0.279188	0.262712	0.205085	0.20678	0.003384	0.169205	0.423012	0.690355	0.998308	0.006768	0.307953	0.558376	0.778342	1	0.001692	0.277496	0.507614	0.771574	0.98308	0.516074	0.245347	0.238579	0.09661	0.049153	0.005085	0.001692	0.260575	0.519459	0.763113	1	0.093063	0.279188	0.467005	0.780034	0.984772	0.01692	0.179357	0.582064	0.725888	0.947547	0.509306	0.359322	0.015228	0.331641	0.546531	0.783418	0.986464	0.387479
0.340136	0.340136	0.319728	0.253425	0.246575	0.226027	0.034014	0.285714	0.557823	0.748299	1	0.020408	0.176871	0.360544	0.591837	0.993197	0.006803	0.319728	0.564626	0.755102	0.972789	0.639456	0.156463	0.204082	0.054795	0.054795	0.013699	0.006803	0.170068	0.333333	0.591837	1	0.129252	0.52381	0.761905	0.823129	0.986395	0.027211	0.557823	0.659864	0.884354	0.938776	0.408163	0.410959	0.027211	0.285714	0.455782	0.741497	0.972789	0.360544
0.323136	0.445507	0.231358	0.260536	0.130268	0.204981	0.003824	0.248566	0.487572	0.711281	0.994264	0.005736	0.229446	0.51434	0.741874	1	0.001912	0.273423	0.470363	0.780115	0.99044	0.695985	0.049713	0.254302	0.032567	0.051724	0.001916	0.001912	0.239006	0.516252	0.699809	1	0.049713	0.210325	0.443595	0.537285	0.837476	0.133843	0.328872	0.424474	0.921606	0.994264	0.386233	0.383142	0.00956	0.273423	0.539197	0.776291	0.99044	0.435946
0.344749	0.424658	0.230594	0.279176	0.173913	0.196796	0.004566	0.30137	0.570776	0.787671	0.997717	0.006849	0.194064	0.388128	0.728311	0.993151	0.002283	0.351598	0.538813	0.703196	1	0.671233	0.041096	0.287671	0.02746	0.050343	0	0.002283	0.187215	0.356164	0.753425	1	0.041096	0.047945	0.860731	0.869863	0.965753	0.009132	0.525114	0.614155	0.728311	0.90411	0.390411	0.356979	0.013699	0.26484	0.497717	0.684932	0.984018	0.383562
0.304348	0.481884	0.213768	0.341818	0.123636	0.192727	0.01087	0.231884	0.492754	0.807971	0.978261	0.007246	0.26087	0.543478	0.789855	1	0.003623	0.23913	0.405797	0.586957	0.869565	0.344203	0.083333	0.572464	0.043636	0.101818	0	0.003623	0.166667	0.442029	0.793478	1	0.413043	0.706522	0.75	0.778986	0.98913	0.050725	0.26087	0.467391	0.637681	0.931159	0.445652	0.334545	0.050725	0.23913	0.416667	0.630435	0.981884	0.48913
0.300781	0.355469	0.34375	0.203922	0.211765	0.254902	0.007812	0.226562	0.507812	0.773438	0.988281	0.011719	0.273438	0.519531	0.710938	1	0.003906	0.234375	0.453125	0.71875	0.992188	0.398438	0.1875	0.414062	0.054902	0.078431	0	0.003906	0.222656	0.519531	0.714844	1	0.113281	0.300781	0.378906	0.597656	0.695312	0.011719	0.242188	0.496094	0.8125	0.992188	0.550781	0.4	0.019531	0.222656	0.464844	0.664062	0.992188	0.390625
0.423729	0.378531	0.19774	0.335227	0.102273	0.1875	0.028249	0.231638	0.564972	0.841808	1	0.011299	0.214689	0.457627	0.689266	0.99435	0.00565	0.265537	0.435028	0.632768	0.943503	0.463277	0.259887	0.276836	0.073864	0.039773	0.017045	0.00565	0.112994	0.367232	0.553672	1	0.146893	0.265537	0.435028	0.717514	0.80226	0.220339	0.570621	0.644068	0.887006	0.960452	0.446328	0.306818	0.016949	0.271186	0.451977	0.694915	0.943503	0.367232
0.382812	0.257812	0.359375	0.173228	0.275591	0.188976	0.023438	0.296875	0.554688	0.804688	1	0.03125	0.1875	0.367188	0.585938	0.984375	0.007812	0.25	0.53125	0.71875	0.929688	0.421875	0.148438	0.429688	0.062992	0.07874	0	0.007812	0.140625	0.359375	0.742188	1	0.125	0.296875	0.390625	0.429688	0.726562	0.0625	0.460938	0.570312	0.828125	0.9375	0.40625	0.393701	0.046875	0.328125	0.523438	0.703125	0.929688	0.234375
0.327586	0.327586	0.344828	0.226087	0.26087	0.226087	0.017241	0.258621	0.491379	0.715517	0.982759	0.025862	0.163793	0.508621	0.741379	0.939655	0.008621	0.241379	0.474138	0.732759	1	0.215517	0.405172	0.37931	0.043478	0.06087	0.026087	0.008621	0.137931	0.37931	0.577586	1	0.077586	0.655172	0.758621	0.87931	0.982759	0.051724	0.224138	0.353448	0.491379	0.62931	0.474138	0.486957	0.068966	0.241379	0.474138	0.689655	0.965517	0.327586
0.391892	0.304054	0.304054	0.278912	0.258503	0.142857	0.033784	0.222973	0.47973	0.777027	1	0.013514	0.202703	0.452703	0.736486	0.952703	0.006757	0.25	0.506757	0.702703	0.986486	0.493243	0.222973	0.283784	0.061224	0.047619	0.006803	0.006757	0.304054	0.601351	0.77027	1	0.358108	0.405405	0.567568	0.709459	0.878378	0.060811	0.121622	0.195946	0.472973	0.945946	0.412162	0.272109	0.060811	0.459459	0.621622	0.736486	0.939189	0.310811
0.289662	0.450358	0.25998	0.242828	0.148566	0.240779	0.004094	0.185261	0.455476	0.763562	0.998976	0.002047	0.27738	0.524053	0.74002	0.997953	0.001024	0.254862	0.451382	0.743091	1	0.576254	0.107472	0.316274	0.04918	0.071721	0.004098	0.001024	0.323439	0.576254	0.787103	1	0.037871	0.174002	0.30911	0.433982	0.995906	0.047083	0.209826	0.418628	0.735926	0.993859	0.426817	0.432377	0.012282	0.283521	0.510747	0.77175	0.995906	0.456499
0.365854	0.300813	0.333333	0.180328	0.319672	0.213115	0.065041	0.284553	0.536585	0.780488	1	0.01626	0.211382	0.471545	0.691057	0.96748	0.00813	0.195122	0.439024	0.682927	0.99187	0.365854	0.349593	0.284553	0.098361	0.032787	0	0.00813	0.292683	0.617886	0.902439	1	0.227642	0.317073	0.430894	0.577236	0.682927	0.056911	0.113821	0.186992	0.788618	0.861789	0.471545	0.442623	0.04878	0.252033	0.487805	0.682927	0.99187	0.325203
0.35119	0.392857	0.255952	0.250373	0.187779	0.183308	0.005952	0.25744	0.488095	0.738095	0.985119	0.004464	0.241071	0.525298	0.779762	1	0.001488	0.25	0.467262	0.699405	0.998512	0.64881	0.169643	0.181548	0.065574	0.068554	0	0.001488	0.27381	0.544643	0.809524	1	0.052083	0.18006	0.333333	0.540179	0.885417	0.06994	0.306548	0.495536	0.696429	0.973214	0.508929	0.354694	0.00744	0.315476	0.592262	0.808036	0.994048	0.388393
0.414938	0.244813	0.340249	0.18711	0.288981	0.191268	0.006224	0.248963	0.497925	0.763485	1	0.008299	0.215768	0.473029	0.690871	0.987552	0.002075	0.26556	0.526971	0.761411	0.993776	0.292531	0.226141	0.481328	0.064449	0.081081	0.002079	0.002075	0.182573	0.495851	0.686722	1	0.093361	0.290456	0.385892	0.558091	0.995851	0.006224	0.242739	0.653527	0.821577	0.966805	0.481328	0.428274	0.010373	0.282158	0.504149	0.732365	0.993776	0.288382
0.396914	0.237027	0.366059	0.179775	0.327247	0.174157	0.008415	0.26648	0.527349	0.771388	1	0.00561	0.246844	0.486676	0.704067	0.997195	0.001403	0.232819	0.472651	0.740533	0.998597	0.460028	0.225806	0.314165	0.095506	0.064607	0.002809	0.001403	0.210379	0.436185	0.750351	1	0.044881	0.151473	0.420757	0.837307	0.976157	0.007013	0.342216	0.565217	0.726508	0.997195	0.59467	0.41573	0.004208	0.255259	0.486676	0.741935	0.997195	0.237027
0.356932	0.345133	0.297935	0.249631	0.208272	0.217134	0.004425	0.231563	0.49115	0.772861	0.998525	0.00885	0.264012	0.520649	0.735988	0.99705	0.001475	0.240413	0.476401	0.738938	1	0.449853	0.253687	0.29646	0.090103	0.063516	0.001477	0.001475	0.213864	0.433628	0.727139	1	0.032448	0.160767	0.421829	0.848083	0.958702	0.00885	0.399705	0.59292	0.747788	0.902655	0.533923	0.363368	0.00295	0.265487	0.498525	0.734513	0.958702	0.386431
0.362416	0.310962	0.326622	0.186099	0.266816	0.174888	0.006711	0.243848	0.501119	0.776286	0.995526	0.017897	0.252796	0.498881	0.684564	1	0.002237	0.223714	0.487696	0.753915	0.997763	0.348993	0.087248	0.563758	0.033632	0.100897	0.002242	0.002237	0.241611	0.527964	0.769575	1	0.217002	0.288591	0.47651	0.543624	0.628635	0.004474	0.181208	0.510067	0.771812	0.986577	0.530201	0.390135	0.011186	0.266219	0.49217	0.680089	0.988814	0.326622
0.315315	0.418919	0.265766	0.270677	0.141353	0.190977	0.012012	0.193694	0.496997	0.779279	0.996997	0.003003	0.192192	0.426426	0.707207	1	0.001502	0.381381	0.564565	0.764264	0.986486	0.516517	0.138138	0.345345	0.055639	0.070677	0.007519	0.001502	0.186186	0.366366	0.684685	1	0.004505	0.430931	0.645646	0.8003	0.914414	0.01952	0.348348	0.564565	0.791291	0.996997	0.478979	0.336842	0.003003	0.381381	0.548048	0.764264	0.986486	0.435435
0.4	0.333333	0.266667	0.244094	0.228346	0.216535	0.011765	0.278431	0.47451	0.709804	0.988235	0.007843	0.223529	0.478431	0.760784	1	0.003922	0.262745	0.537255	0.780392	0.996078	0.396078	0.223529	0.380392	0.070866	0.055118	0	0.003922	0.231373	0.454902	0.792157	1	0.039216	0.270588	0.352941	0.772549	0.992157	0.109804	0.2	0.529412	0.698039	0.882353	0.501961	0.425197	0.019608	0.243137	0.537255	0.784314	0.976471	0.286275
0.373606	0.405204	0.22119	0.255121	0.148976	0.188082	0.005576	0.369888	0.635688	0.834572	1	0.003717	0.224907	0.39777	0.654275	0.994424	0.001859	0.159851	0.468401	0.684015	0.996283	0.546468	0.013011	0.44052	0.009311	0.083799	0.001862	0.001859	0.245353	0.3829	0.669145	1	0.420074	0.420074	0.942379	0.990706	0.994424	0.01487	0.169145	0.615242	0.765799	0.94052	0.381041	0.357542	0.013011	0.19145	0.477695	0.674721	0.996283	0.442379
0.45045	0.198198	0.351351	0.1	0.309091	0.118182	0.018018	0.171171	0.522523	0.765766	1	0.117117	0.207207	0.333333	0.468468	0.810811	0.009009	0.252252	0.594595	0.792793	0.990991	0.351351	0.171171	0.477477	0.072727	0.054545	0.018182	0.009009	0.171171	0.315315	0.684685	1	0.234234	0.261261	0.378378	0.720721	0.972973	0.081081	0.441441	0.558559	0.837838	0.963964	0.432432	0.381818	0.045045	0.261261	0.477477	0.72973	0.990991	0.198198
0.356164	0.383562	0.260274	0.282759	0.186207	0.2	0.041096	0.212329	0.506849	0.739726	0.972603	0.013699	0.239726	0.445205	0.712329	0.986301	0.006849	0.246575	0.59589	0.780822	1	0.486301	0.212329	0.30137	0.068966	0.055172	0	0.006849	0.267123	0.390411	0.650685	1	0.184932	0.458904	0.609589	0.80137	0.890411	0.034247	0.10274	0.541096	0.69863	0.965753	0.315068	0.441379	0.075342	0.438356	0.589041	0.760274	0.979452	0.363014
0.38833	0.327968	0.283702	0.274194	0.191532	0.197581	0.006036	0.217304	0.440644	0.696177	1	0.004024	0.245473	0.515091	0.746479	0.993964	0.002012	0.31992	0.561368	0.790744	0.991952	0.468813	0.092555	0.438632	0.042339	0.094758	0.006048	0.002012	0.158954	0.368209	0.661972	1	0.070423	0.593561	0.762575	0.889336	0.969819	0.004024	0.32998	0.535211	0.750503	0.991952	0.38833	0.342742	0.016097	0.484909	0.657948	0.841046	0.991952	0.358149
0.277834	0.38014	0.342026	0.210843	0.199799	0.279116	0.003009	0.254764	0.481444	0.747242	1	0.002006	0.278837	0.508526	0.74323	0.996991	0.001003	0.219659	0.494483	0.750251	0.998997	0.468405	0.27984	0.251755	0.101406	0.057229	0.01506	0.001003	0.332999	0.558676	0.789368	1	0.004012	0.344032	0.5667	0.764293	0.976931	0.007021	0.078235	0.203611	0.553661	0.93681	0.61986	0.343373	0.004012	0.251755	0.52658	0.762287	0.998997	0.394183
0.320819	0.34471	0.334471	0.232877	0.191781	0.236301	0.013652	0.262799	0.467577	0.764505	0.996587	0.006826	0.194539	0.501706	0.706485	1	0.003413	0.245734	0.508532	0.771331	0.986348	0.443686	0.276451	0.279863	0.10274	0.054795	0.006849	0.003413	0.150171	0.406143	0.607509	1	0.010239	0.194539	0.307167	0.505119	0.699659	0.051195	0.744027	0.825939	0.914676	0.989761	0.566553	0.369863	0.006826	0.262799	0.498294	0.737201	0.982935	0.354949
0.375	0.359375	0.265625	0.285714	0.206349	0.222222	0.046875	0.25	0.5	0.8125	1	0.03125	0.109375	0.375	0.640625	0.9375	0.015625	0.3125	0.53125	0.71875	0.984375	0.71875	0.171875	0.109375	0.126984	0.063492	0	0.015625	0.234375	0.5625	0.734375	1	0.265625	0.28125	0.421875	0.53125	0.875	0.078125	0.078125	0.109375	0.78125	0.8125	0.28125	0.380952	0.265625	0.328125	0.53125	0.625	0.875	0.375
0.327965	0.366032	0.306003	0.266862	0.217009	0.22434	0.004392	0.222548	0.524158	0.793558	0.992679	0.002928	0.232796	0.481698	0.708638	1	0.001464	0.292826	0.49634	0.743777	0.998536	0.387994	0.17716	0.434846	0.079179	0.073314	0.005865	0.001464	0.257687	0.483163	0.82284	1	0.010249	0.18448	0.395315	0.866764	0.998536	0.033675	0.27672	0.531479	0.679356	0.926794	0.537335	0.378299	0.011713	0.25183	0.464129	0.693997	0.998536	0.382138
0.375	0.25	0.375	0.264368	0.195402	0.172414	0.204545	0.443182	0.613636	0.75	0.988636	0.022727	0.261364	0.454545	0.704545	0.954545	0.011364	0.113636	0.238636	0.534091	1	0.272727	0	0.727273	0	0.045977	0	0.011364	0.670455	0.863636	0.931818	1	0	0	0	0	0	0.022727	0.193182	0.375	0.556818	0.840909	0.318182	0.344828	0.034091	0.284091	0.511364	0.806818	0.977273	0.193182
0.43038	0.303797	0.265823	0.217949	0.25641	0.115385	0.050633	0.329114	0.56962	0.734177	1	0.025316	0.126582	0.658228	0.810127	0.987342	0.012658	0.202532	0.303797	0.468354	0.886076	0.43038	0.050633	0.518987	0.025641	0.102564	0	0.012658	0.101266	0.468354	0.797468	1	0.392405	0.392405	0.405063	0.417722	0.43038	0.139241	0.253165	0.531646	0.658228	0.962025	0.367089	0.410256	0.063291	0.21519	0.392405	0.556962	0.886076	0.303797
0.303371	0.337079	0.359551	0.20904	0.180791	0.299435	0.011236	0.235955	0.477528	0.702247	1	0.016854	0.247191	0.5	0.741573	0.966292	0.005618	0.230337	0.505618	0.792135	0.994382	0.488764	0.269663	0.241573	0.067797	0.101695	0	0.005618	0.202247	0.47191	0.707865	1	0.269663	0.449438	0.724719	0.859551	0.938202	0.022472	0.151685	0.235955	0.606742	0.988764	0.55618	0.361582	0.02809	0.297753	0.533708	0.758427	0.97191	0.370787
0.295417	0.463993	0.240589	0.241605	0.144963	0.225225	0.004092	0.225041	0.425532	0.781506	0.999182	0.002455	0.268412	0.53437	0.754501	0.998363	0.000818	0.242226	0.463993	0.722586	1	0.684124	0.079378	0.236498	0.035217	0.048321	0.000819	0.000818	0.253682	0.523732	0.757774	1	0.035188	0.164484	0.270049	0.569558	0.994272	0.013912	0.288871	0.42144	0.751227	0.988543	0.373159	0.34398	0.009002	0.259411	0.482815	0.702946	0.997545	0.494272
0.313131	0.323232	0.363636	0.255102	0.193878	0.244898	0.040404	0.232323	0.535354	0.79798	0.989899	0.020202	0.20202	0.505051	0.737374	1	0.010101	0.313131	0.474747	0.717172	0.959596	0.59596	0.232323	0.171717	0.122449	0.081633	0	0.010101	0.171717	0.525253	0.818182	1	0.141414	0.232323	0.343434	0.636364	0.888889	0.383838	0.414141	0.484848	0.69697	0.808081	0.353535	0.387755	0.030303	0.292929	0.484848	0.717172	0.868687	0.393939
0.345745	0.329787	0.324468	0.251337	0.235294	0.187166	0.010638	0.25	0.430851	0.643617	1	0.021277	0.191489	0.510638	0.771277	0.994681	0.005319	0.297872	0.531915	0.707447	0.978723	0.441489	0.494681	0.06383	0.171123	0.010695	0	0.005319	0.244681	0.579787	0.803191	1	0.010638	0.223404	0.398936	0.670213	0.978723	0.515957	0.526596	0.542553	0.558511	0.574468	0.398936	0.459893	0.015957	0.223404	0.494681	0.680851	0.973404	0.329787
0.328125	0.359375	0.3125	0.230366	0.256545	0.209424	0.020833	0.171875	0.40625	0.703125	1	0.010417	0.223958	0.520833	0.78125	0.989583	0.005208	0.333333	0.526042	0.744792	0.994792	0.390625	0.494792	0.114583	0.151832	0.036649	0.026178	0.005208	0.203125	0.34375	0.807292	1	0.0625	0.359375	0.53125	0.739583	0.973958	0.130208	0.171875	0.463542	0.489583	0.989583	0.583333	0.324607	0.072917	0.307292	0.520833	0.776042	0.994792	0.369792
0.431818	0.357955	0.210227	0.268571	0.234286	0.137143	0.017045	0.397727	0.551136	0.755682	0.982955	0.011364	0.147727	0.301136	0.602273	1	0.005682	0.215909	0.630682	0.806818	0.994318	0.4375	0.028409	0.534091	0.017143	0.062857	0.017143	0.005682	0.107955	0.272727	0.863636	1	0.210227	0.210227	0.215909	0.221591	0.982955	0.136364	0.448864	0.585227	0.721591	0.988636	0.414773	0.434286	0.028409	0.130682	0.409091	0.704545	0.977273	0.357955
0.336683	0.38191	0.281407	0.212121	0.191919	0.217172	0.015075	0.180905	0.422111	0.738693	0.98995	0.045226	0.286432	0.592965	0.743719	1	0.005025	0.19598	0.467337	0.758794	0.994975	0.432161	0.341709	0.226131	0.141414	0.040404	0	0.005025	0.241206	0.603015	0.743719	1	0.01005	0.150754	0.472362	0.653266	0.994975	0.251256	0.301508	0.38191	0.829146	0.919598	0.60804	0.353535	0.01005	0.231156	0.472362	0.728643	0.994975	0.38191
0.25625	0.45	0.29375	0.213836	0.176101	0.264151	0.03125	0.18125	0.5125	0.73125	0.9875	0.00625	0.24375	0.4375	0.6875	1	0.01875	0.25	0.55625	0.79375	0.98125	0.58125	0.09375	0.325	0.062893	0.062893	0.012579	0.00625	0.3375	0.4875	0.6875	1	0.04375	0.05625	0.29375	0.90625	0.9875	0.025	0.14375	0.55625	0.8125	0.9	0.525	0.352201	0.025	0.25625	0.44375	0.7875	0.98125	0.4125
0.385714	0.34	0.274286	0.224607	0.23319	0.195994	0.004286	0.258571	0.482857	0.724286	0.998571	0.002857	0.201429	0.52	0.824286	0.997143	0.001429	0.257143	0.508571	0.728571	1	0.42	0.038571	0.541429	0.021459	0.072961	0.004292	0.001429	0.104286	0.588571	0.841429	1	0.115714	0.541429	0.837143	0.915714	0.975714	0.105714	0.274286	0.462857	0.68	0.954286	0.332857	0.463519	0.008571	0.237143	0.492857	0.717143	0.994286	0.364286
0.310757	0.356574	0.332669	0.195609	0.211577	0.241517	0.003984	0.219124	0.517928	0.749004	0.998008	0.01992	0.282869	0.5	0.772908	1	0.001992	0.201195	0.476096	0.7251	0.982072	0.523904	0.09761	0.378486	0.047904	0.083832	0.007984	0.001992	0.250996	0.442231	0.635458	1	0.021912	0.258964	0.48008	0.589641	0.691235	0.047809	0.2251	0.713147	0.854582	0.98008	0.603586	0.371257	0.005976	0.270916	0.476096	0.727092	0.982072	0.366534
0.276364	0.465455	0.258182	0.233577	0.149635	0.255474	0.007273	0.232727	0.461818	0.687273	1	0.014545	0.247273	0.527273	0.749091	0.974545	0.003636	0.254545	0.465455	0.8	0.996364	0.898182	0.101818	0	0.080292	0	0	0.003636	0.258182	0.498182	0.738182	1	0.036364	0.08	0.389091	0.898182	0.989091	0	0	0	0	0	0.501818	0.248175	0.025455	0.258182	0.512727	0.792727	0.996364	0.429091
0.360952	0.29619	0.342857	0.20877	0.258341	0.204004	0.00381	0.245714	0.514286	0.775238	0.99619	0.001905	0.231429	0.477143	0.722857	1	0.000952	0.26	0.499048	0.73619	0.999048	0.402857	0.172381	0.424762	0.085796	0.070543	0.00572	0.000952	0.251429	0.38381	0.635238	1	0.03619	0.235238	0.488571	0.879048	0.999048	0.006667	0.268571	0.610476	0.759048	0.964762	0.58381	0.390848	0.004762	0.233333	0.49619	0.706667	0.999048	0.308571
0.192225	0.326134	0.481641	0.121212	0.151515	0.337662	0.010799	0.287257	0.589633	0.805616	0.99784	0.00432	0.241901	0.49892	0.721382	0.987041	0.00216	0.237581	0.466523	0.740821	1	0.218143	0.058315	0.723542	0.021645	0.060606	0.012987	0.00216	0.291577	0.613391	0.712743	1	0.116631	0.12743	0.302376	0.645788	0.717063	0.006479	0.25054	0.475162	0.764579	0.993521	0.676026	0.277056	0.006479	0.24838	0.507559	0.727862	0.991361	0.308855
0.444444	0.240741	0.314815	0.273292	0.26087	0.136646	0.012346	0.265432	0.444444	0.623457	0.993827	0.030864	0.240741	0.506173	0.734568	0.962963	0.006173	0.179012	0.635802	0.82716	1	0.462963	0.265432	0.271605	0.10559	0.043478	0.006211	0.006173	0.401235	0.518519	0.722222	1	0.030864	0.635802	0.746914	0.845679	0.950617	0.061728	0.123457	0.277778	0.345679	0.987654	0.41358	0.385093	0.018519	0.209877	0.660494	0.833333	0.981481	0.271605
0.397959	0.255102	0.346939	0.247423	0.278351	0.206186	0.040816	0.27551	0.591837	0.795918	1	0.071429	0.173469	0.377551	0.693878	0.979592	0.010204	0.234694	0.428571	0.632653	0.969388	0.234694	0	0.765306	0	0.082474	0	0.010204	0.326531	0.387755	0.642857	1	0	0	0	0	0	0.030612	0.204082	0.489796	0.755102	0.94898	0.469388	0.43299	0.05102	0.285714	0.489796	0.642857	0.918367	0.285714
0.27619	0.409524	0.314286	0.259615	0.153846	0.240385	0.057143	0.304762	0.514286	0.838095	1	0.019048	0.2	0.352381	0.733333	0.961905	0.009524	0.209524	0.571429	0.666667	0.942857	0.514286	0.07619	0.409524	0.076923	0.076923	0	0.009524	0.27619	0.457143	0.828571	1	0.219048	0.295238	0.361905	0.380952	0.771429	0.028571	0.114286	0.533333	0.638095	0.92381	0.666667	0.288462	0.028571	0.190476	0.419048	0.657143	0.952381	0.428571
0.439815	0.37963	0.180556	0.427907	0.181395	0.12093	0.018519	0.217593	0.49537	0.75463	1	0.009259	0.194444	0.444444	0.643519	0.99537	0.00463	0.324074	0.675926	0.824074	0.944444	0.671296	0.25	0.078704	0.093023	0.009302	0	0.00463	0.166667	0.458333	0.657407	1	0.375	0.615741	0.782407	0.87963	0.949074	0.259259	0.273148	0.291667	0.310185	0.333333	0.319444	0.27907	0.023148	0.37037	0.611111	0.782407	0.944444	0.5
0.240476	0.32381	0.435714	0.152745	0.183771	0.300716	0.004762	0.240476	0.488095	0.771429	1	0.007143	0.221429	0.538095	0.769048	0.992857	0.002381	0.261905	0.490476	0.72381	0.997619	0.240476	0.007143	0.752381	0.004773	0.090692	0	0.002381	0.32381	0.583333	0.795238	1	0.6	0.6	0.6	0.602381	0.604762	0.004762	0.245238	0.459524	0.740476	0.985714	0.688095	0.238663	0.009524	0.230952	0.459524	0.735714	0.995238	0.309524
0.28	0.432	0.288	0.265688	0.17223	0.257677	0.004	0.241333	0.5	0.742667	0.993333	0.002667	0.224	0.489333	0.762667	0.998667	0.001333	0.274667	0.509333	0.725333	1	0.498667	0.077333	0.424	0.026702	0.101469	0.00534	0.001333	0.138667	0.401333	0.650667	1	0.048	0.222667	0.284	0.362667	0.788	0.094667	0.446667	0.682667	0.821333	0.989333	0.497333	0.333778	0.02	0.362667	0.584	0.774667	0.993333	0.456
0.127059	0.381176	0.491765	0.09434	0.115566	0.353774	0.084706	0.209412	0.487059	0.778824	1	0.004706	0.254118	0.432941	0.665882	0.988235	0.002353	0.24	0.529412	0.774118	0.997647	0.176471	0.018824	0.804706	0.002358	0.082547	0.007075	0.002353	0.256471	0.472941	0.731765	1	0.835294	0.842353	0.847059	0.851765	0.856471	0.004706	0.237647	0.498824	0.734118	0.995294	0.814118	0.183962	0.007059	0.256471	0.515294	0.764706	0.990588	0.392941
0.252577	0.405498	0.341924	0.203098	0.158348	0.299484	0.020619	0.233677	0.503436	0.723368	0.991409	0.003436	0.268041	0.5189	0.762887	0.998282	0.001718	0.230241	0.467354	0.761168	1	0.52921	0.300687	0.170103	0.096386	0.034423	0.006885	0.001718	0.261168	0.479381	0.735395	1	0.065292	0.381443	0.553265	0.718213	0.955326	0.0189	0.213058	0.331615	0.929553	0.989691	0.606529	0.285714	0.008591	0.238832	0.493127	0.762887	0.989691	0.40378
0.33581	0.337296	0.326895	0.223214	0.202381	0.229167	0.002972	0.33581	0.566122	0.768202	0.998514	0.008915	0.237741	0.454681	0.77266	0.995542	0.001486	0.187221	0.46211	0.713224	1	0.393759	0.117385	0.488856	0.053571	0.071429	0.005952	0.001486	0.27786	0.517088	0.830609	1	0.008915	0.205052	0.334324	0.534918	0.965825	0.023774	0.251114	0.546805	0.692422	0.989599	0.528975	0.342262	0.005944	0.206538	0.427935	0.725111	0.991085	0.356612
0.31134	0.354639	0.334021	0.200413	0.214876	0.233471	0.016495	0.220619	0.443299	0.750515	1	0.004124	0.272165	0.529897	0.742268	0.989691	0.002062	0.25567	0.496907	0.756701	0.997938	0.412371	0.17732	0.410309	0.072314	0.076446	0.002066	0.002062	0.241237	0.470103	0.68866	1	0.006186	0.072165	0.379381	0.606186	0.870103	0.096907	0.301031	0.624742	0.847423	0.991753	0.678351	0.318182	0.006186	0.276289	0.51134	0.736082	0.991753	0.342268
0.333333	0.347701	0.318966	0.220144	0.221583	0.231655	0.005747	0.255747	0.5	0.719828	1	0.002874	0.234195	0.534483	0.817529	0.998563	0.001437	0.241379	0.472701	0.715517	0.997126	0.449713	0.222701	0.327586	0.073381	0.070504	0.004317	0.001437	0.227011	0.593391	0.83908	1	0.008621	0.152299	0.295977	0.827586	0.971264	0.007184	0.375	0.465517	0.62069	0.75	0.505747	0.417266	0.00431	0.251437	0.541667	0.804598	0.997126	0.364943
0.271186	0.418079	0.310734	0.220963	0.15864	0.252125	0.008475	0.257062	0.522599	0.757062	0.991525	0.00565	0.223164	0.443503	0.683616	1	0.002825	0.251412	0.567797	0.805085	0.983051	0.516949	0.242938	0.240113	0.127479	0.053824	0.008499	0.002825	0.228814	0.502825	0.751412	1	0.166667	0.299435	0.415254	0.618644	0.977401	0.016949	0.135593	0.59322	0.884181	0.985876	0.545198	0.385269	0.014124	0.268362	0.474576	0.686441	0.974576	0.384181
0.292096	0.443299	0.264605	0.262069	0.155172	0.241379	0.024055	0.237113	0.484536	0.721649	1	0.006873	0.233677	0.505155	0.797251	0.996564	0.003436	0.261168	0.487973	0.714777	0.972509	0.467354	0.072165	0.460481	0.062069	0.089655	0	0.003436	0.367698	0.556701	0.831615	1	0.158076	0.597938	0.90378	0.958763	0.979381	0.027491	0.14433	0.347079	0.66323	0.824742	0.536082	0.365517	0.020619	0.254296	0.4811	0.718213	0.975945	0.446735
0.38191	0.281407	0.336683	0.20202	0.247475	0.20202	0.025126	0.326633	0.567839	0.768844	1	0.01005	0.18593	0.457286	0.723618	0.994975	0.005025	0.241206	0.437186	0.758794	0.98995	0.452261	0.110553	0.437186	0.060606	0.070707	0	0.005025	0.130653	0.537688	0.748744	1	0.095477	0.522613	0.78392	0.809045	0.969849	0.145729	0.261307	0.376884	0.658291	0.944724	0.467337	0.424242	0.020101	0.231156	0.422111	0.703518	0.969849	0.291457
0.35124	0.376033	0.272727	0.267081	0.20911	0.213251	0.006198	0.260331	0.485537	0.75	0.997934	0.004132	0.225207	0.487603	0.71281	0.979339	0.002066	0.264463	0.520661	0.783058	1	0.597107	0.183884	0.219008	0.070393	0.05383	0.012422	0.002066	0.225207	0.518595	0.737603	1	0.07438	0.433884	0.609504	0.791322	0.997934	0.010331	0.18595	0.336777	0.747934	0.981405	0.634298	0.289855	0.014463	0.258264	0.504132	0.745868	0.995868	0.440083
0.241935	0.43871	0.319355	0.200647	0.18123	0.278317	0.016129	0.23871	0.503226	0.764516	0.983871	0.009677	0.245161	0.483871	0.725806	0.996774	0.003226	0.235484	0.53871	0.767742	1	0.274194	0	0.725806	0	0.10356	0	0.003226	0.190323	0.496774	0.796774	1	0	0	0	0	0	0.041935	0.274194	0.483871	0.735484	0.964516	0.754839	0.135922	0.006452	0.274194	0.522581	0.745161	0.993548	0.451613
0.311715	0.267782	0.420502	0.15304	0.291405	0.245283	0.004184	0.251046	0.453975	0.730126	0.993724	0.008368	0.257322	0.577406	0.788703	0.995816	0.002092	0.240586	0.464435	0.721757	1	0.380753	0.104603	0.514644	0.041929	0.08805	0.008386	0.002092	0.253138	0.516736	0.797071	1	0.213389	0.322176	0.627615	0.805439	0.981172	0.018828	0.179916	0.48954	0.715481	0.935146	0.552301	0.477987	0.006276	0.225941	0.491632	0.73431	0.995816	0.328452
0.287572	0.426301	0.286127	0.240232	0.170767	0.269175	0.007225	0.216763	0.416185	0.66763	0.988439	0.00289	0.310694	0.58237	0.802023	0.99711	0.001445	0.212428	0.432081	0.712428	1	0.65896	0.041908	0.299133	0.026049	0.049204	0	0.001445	0.452312	0.651734	0.82659	1	0.171965	0.468208	0.618497	0.822254	0.947977	0.00578	0.112717	0.270231	0.367052	0.674855	0.508671	0.370478	0.00578	0.225434	0.456647	0.75578	0.99422	0.445087
0.261538	0.384615	0.353846	0.162791	0.147287	0.224806	0.153846	0.453846	0.607692	0.807692	0.992308	0.030769	0.230769	0.538462	0.753846	0.969231	0.007692	0.138462	0.323077	0.515385	1	0.438462	0.023077	0.538462	0.015504	0.062016	0.015504	0.007692	0.353846	0.676923	0.784615	1	0.030769	0.030769	0.030769	0.046154	0.053846	0.038462	0.184615	0.423077	0.553846	0.938462	0.530769	0.232558	0.015385	0.138462	0.284615	0.515385	0.961538	0.361538
0.277331	0.458199	0.264469	0.226066	0.161706	0.225261	0.002412	0.277331	0.445338	0.680064	0.997588	0.004019	0.265273	0.608521	0.790193	1	0.000804	0.194534	0.432476	0.663183	0.999196	0.598071	0.143087	0.258842	0.052293	0.047466	0.000805	0.000804	0.275723	0.638264	0.787781	1	0.002412	0.074759	0.161576	0.229904	0.32717	0.299035	0.448553	0.528939	0.617363	0.999196	0.479904	0.366854	0.003215	0.209807	0.454984	0.704984	0.996785	0.475884
0.158273	0.398082	0.443645	0.100962	0.125	0.394231	0.009592	0.170264	0.453237	0.630695	0.980815	0.004796	0.2494	0.510791	0.714628	0.997602	0.002398	0.258993	0.515588	0.779376	1	0.270983	0.047962	0.681055	0.019231	0.091346	0.004808	0.002398	0.323741	0.625899	0.791367	1	0.254197	0.640288	0.652278	0.976019	0.992806	0.021583	0.215827	0.422062	0.71223	0.961631	0.798561	0.158654	0.01199	0.270983	0.515588	0.738609	0.992806	0.374101
0.330454	0.401728	0.267819	0.268398	0.17316	0.242424	0.008639	0.259179	0.457883	0.688985	0.991361	0.006479	0.233261	0.462203	0.723542	0.987041	0.00216	0.237581	0.600432	0.809935	1	0.518359	0.213823	0.267819	0.095238	0.056277	0	0.00216	0.183585	0.397408	0.680346	1	0.107991	0.24622	0.565875	0.829374	0.937365	0.015119	0.481641	0.611231	0.777538	0.99568	0.50108	0.34632	0.00432	0.25486	0.63067	0.829374	0.99568	0.416847
0.344633	0.276836	0.378531	0.176136	0.289773	0.238636	0.016949	0.242938	0.474576	0.79661	0.99435	0.011299	0.384181	0.531073	0.745763	1	0.00565	0.175141	0.429379	0.700565	0.977401	0.40678	0.19774	0.39548	0.073864	0.096591	0.005682	0.00565	0.378531	0.542373	0.79661	1	0.016949	0.056497	0.40678	0.508475	0.824859	0.079096	0.265537	0.661017	0.757062	0.983051	0.587571	0.329545	0.011299	0.254237	0.485876	0.711864	0.966102	0.271186
0.262609	0.431304	0.306087	0.219512	0.163763	0.266551	0.003478	0.201739	0.431304	0.688696	0.994783	0.008696	0.302609	0.573913	0.768696	1	0.001739	0.217391	0.469565	0.723478	0.998261	0.563478	0.161739	0.274783	0.06446	0.06446	0.001742	0.001739	0.295652	0.594783	0.777391	1	0.043478	0.217391	0.410435	0.641739	0.834783	0.005217	0.153043	0.446957	0.756522	0.994783	0.695652	0.285714	0.005217	0.328696	0.554783	0.775652	0.998261	0.462609
0.203704	0.462963	0.333333	0.158879	0.140187	0.327103	0.074074	0.305556	0.537037	0.62037	0.990741	0.037037	0.277778	0.5	0.787037	0.953704	0.009259	0.157407	0.324074	0.694444	1	0.527778	0.148148	0.324074	0.056075	0.056075	0	0.009259	0.388889	0.583333	0.712963	1	0.759259	0.787037	0.861111	0.953704	0.990741	0.046296	0.111111	0.194444	0.296296	0.555556	0.435185	0.35514	0.027778	0.12963	0.240741	0.675926	0.981481	0.425926
0.314136	0.376963	0.308901	0.268421	0.231579	0.226316	0.010471	0.350785	0.565445	0.780105	1	0.015707	0.219895	0.471204	0.706806	0.968586	0.005236	0.136126	0.445026	0.675393	0.989529	0.586387	0.240838	0.172775	0.115789	0.042105	0	0.005236	0.225131	0.471204	0.743455	1	0.209424	0.439791	0.549738	0.790576	0.994764	0.020942	0.057592	0.308901	0.675393	0.942408	0.596859	0.421053	0.015707	0.17801	0.429319	0.664921	0.984293	0.455497
0.335912	0.350276	0.313812	0.243363	0.204646	0.192478	0.003315	0.222099	0.437569	0.765746	1	0.00221	0.266298	0.487293	0.720442	0.99779	0.001105	0.245304	0.537017	0.754696	0.99337	0.474033	0.152486	0.373481	0.064159	0.075221	0.004425	0.001105	0.271823	0.432044	0.744751	1	0.007735	0.164641	0.583425	0.807735	0.970166	0.025414	0.342541	0.523757	0.759116	0.944751	0.577901	0.336283	0.00884	0.254144	0.538122	0.730387	0.99337	0.387845
0.316804	0.435262	0.247934	0.259669	0.168508	0.19337	0.019284	0.294766	0.556474	0.796143	1	0.008264	0.198347	0.451791	0.716253	0.99449	0.002755	0.225895	0.495868	0.721763	0.991736	0.743802	0.107438	0.14876	0.063536	0.041436	0.002762	0.002755	0.247934	0.487603	0.724518	1	0.057851	0.146006	0.209366	0.539945	0.876033	0.016529	0.311295	0.77135	0.922865	0.991736	0.402204	0.403315	0.033058	0.214876	0.528926	0.727273	0.991736	0.440771
0.735135	0.237838	0.027027	0.461957	0.043478	0.005435	0.010811	0.243243	0.497297	0.724324	1	0.021622	0.264865	0.508108	0.8	0.967568	0.005405	0.005405	0.075676	0.432432	0.902703	0.237838	0	0.762162	0	0.108696	0	0.005405	0.081081	0.2	0.356757	1	0	0	0	0	0	0.037838	0.367568	0.567568	0.762162	0.983784	0	0	0	0	0	0	0	0.232432
0.318182	0.306818	0.375	0.188571	0.222857	0.217143	0.017045	0.318182	0.602273	0.818182	0.994318	0.011364	0.227273	0.477273	0.670455	1	0.005682	0.204545	0.448864	0.681818	0.971591	0.4375	0.125	0.4375	0.051429	0.097143	0.005714	0.005682	0.232955	0.465909	0.715909	1	0.034091	0.056818	0.210227	0.4375	0.6875	0.102273	0.346591	0.539773	0.806818	0.971591	0.630682	0.411429	0.028409	0.221591	0.482955	0.681818	0.977273	0.306818
0.273408	0.588015	0.138577	0.289474	0.093985	0.150376	0.007491	0.258427	0.404494	0.666667	0.988764	0.018727	0.2397	0.498127	0.741573	1	0.003745	0.235955	0.655431	0.838951	0.996255	0.621723	0.205993	0.172285	0.075188	0.037594	0	0.003745	0.322097	0.486891	0.670412	1	0.161049	0.220974	0.797753	0.88764	0.996255	0.011236	0.048689	0.104869	0.715356	0.973783	0.689139	0.225564	0.014981	0.258427	0.438202	0.707865	0.996255	0.453184
0.320588	0.344118	0.335294	0.188791	0.265487	0.256637	0.005882	0.229412	0.567647	0.782353	0.991176	0.008824	0.252941	0.438235	0.688235	1	0.002941	0.247059	0.517647	0.770588	0.988235	0.426471	0.320588	0.252941	0.123894	0.058997	0.0059	0.002941	0.208824	0.397059	0.697059	1	0.008824	0.126471	0.482353	0.761765	0.988235	0.273529	0.435294	0.582353	0.732353	0.952941	0.667647	0.336283	0.008824	0.244118	0.505882	0.729412	0.988235	0.405882
0.264325	0.395564	0.340111	0.201852	0.17963	0.290741	0.031423	0.28281	0.526802	0.750462	0.996303	0.005545	0.256932	0.500924	0.746765	0.998152	0.001848	0.214418	0.475046	0.737523	1	0.532348	0.256932	0.210721	0.083333	0.05	0.001852	0.001848	0.279113	0.50647	0.743068	1	0.049908	0.177449	0.415896	0.857671	0.990758	0.011091	0.354898	0.469501	0.608133	0.781885	0.582255	0.340741	0.009242	0.264325	0.543438	0.744917	0.992606	0.406654
0.351163	0.32093	0.327907	0.228438	0.2331	0.223776	0.004651	0.218605	0.47907	0.732558	0.997674	0.009302	0.276744	0.513953	0.739535	0.981395	0.002326	0.253488	0.495349	0.753488	1	0.432558	0.172093	0.395349	0.09324	0.074592	0.004662	0.002326	0.227907	0.553488	0.806977	1	0.067442	0.183721	0.583721	0.869767	0.95814	0.006977	0.276744	0.437209	0.681395	0.995349	0.602326	0.41958	0.006977	0.260465	0.523256	0.748837	0.995349	0.32093
0.387097	0.340176	0.272727	0.323529	0.267647	0.176471	0.01173	0.281525	0.516129	0.762463	1	0.020528	0.252199	0.475073	0.730205	0.973607	0.002933	0.193548	0.469208	0.72434	0.991202	0.513196	0.422287	0.064516	0.164706	0.011765	0.005882	0.002933	0.249267	0.480938	0.747801	1	0.026393	0.193548	0.466276	0.692082	0.994135	0.26393	0.935484	0.953079	0.967742	0.985337	0.44868	0.5	0.02346	0.231672	0.489736	0.71261	0.991202	0.331378
0.291667	0.491667	0.216667	0.285714	0.176471	0.218487	0.025	0.341667	0.525	0.7	1	0.016667	0.183333	0.4	0.775	0.991667	0.008333	0.233333	0.516667	0.683333	0.875	0.441667	0.041667	0.516667	0.033613	0.084034	0	0.008333	0.383333	0.733333	0.875	1	0.033333	0.033333	0.783333	0.791667	0.808333	0.075	0.216667	0.35	0.533333	0.958333	0.575	0.369748	0.033333	0.2	0.4	0.658333	0.958333	0.541667
0.4	0.315385	0.284615	0.217054	0.248062	0.162791	0.023077	0.230769	0.523077	0.753846	0.992308	0.015385	0.253846	0.469231	0.769231	1	0.007692	0.207692	0.484615	0.661538	0.946154	0.415385	0.053846	0.530769	0.015504	0.139535	0.015504	0.007692	0.307692	0.569231	0.784615	1	0.592308	0.592308	0.607692	0.623077	0.669231	0.023077	0.161538	0.369231	0.653846	0.938462	0.423077	0.387597	0.030769	0.323077	0.5	0.638462	0.953846	0.346154
0.278481	0.379747	0.341772	0.212698	0.190476	0.27619	0.025316	0.21519	0.503165	0.737342	1	0.012658	0.268987	0.515823	0.775316	0.987342	0.003165	0.231013	0.474684	0.71519	0.993671	0.471519	0.370253	0.158228	0.190476	0.038095	0	0.003165	0.291139	0.522152	0.743671	1	0.063291	0.379747	0.582278	0.753165	0.927215	0.009494	0.129747	0.199367	0.275316	0.987342	0.658228	0.368254	0.009494	0.278481	0.531646	0.762658	0.993671	0.401899
0.311164	0.380048	0.308789	0.22619	0.22381	0.221429	0.014252	0.266033	0.517815	0.769596	1	0.004751	0.232779	0.467933	0.726841	0.997625	0.002375	0.24228	0.503563	0.745843	0.985748	0.4038	0.251781	0.344418	0.1	0.052381	0	0.002375	0.273159	0.491686	0.693587	1	0.007126	0.31829	0.605701	0.805226	0.990499	0.038005	0.168646	0.472684	0.767221	0.961995	0.634204	0.347619	0.007126	0.239905	0.477435	0.719715	0.992874	0.432304
0.236842	0.453216	0.309942	0.205279	0.13783	0.281525	0.005848	0.207602	0.540936	0.774854	1	0.011696	0.28655	0.479532	0.733918	0.97076	0.002924	0.172515	0.48538	0.739766	0.997076	0.423977	0.190058	0.385965	0.085044	0.067449	0.002933	0.002924	0.295322	0.508772	0.722222	1	0.005848	0.157895	0.540936	0.695906	0.938596	0.026316	0.204678	0.473684	0.769006	0.982456	0.570175	0.346041	0.008772	0.225146	0.526316	0.754386	0.976608	0.476608
0.315851	0.312354	0.371795	0.177363	0.249708	0.259043	0.006993	0.270396	0.534965	0.770396	0.997669	0.003497	0.19697	0.40676	0.699301	0.998834	0.001166	0.296037	0.525641	0.765734	1	0.578089	0.090909	0.331002	0.058343	0.077013	0.002334	0.001166	0.270396	0.568765	0.77972	1	0.060606	0.410256	0.657343	0.80303	0.9662	0.004662	0.195804	0.382284	0.592075	0.994172	0.488345	0.473746	0.002331	0.227273	0.441725	0.693473	0.993007	0.319347
0.299331	0.41806	0.282609	0.249581	0.177554	0.232831	0.013378	0.289298	0.5	0.755853	1	0.003344	0.214047	0.468227	0.740803	0.994983	0.001672	0.270903	0.523411	0.745819	0.998328	0.446488	0.280936	0.272575	0.117253	0.063652	0	0.001672	0.279264	0.593645	0.832776	1	0.018395	0.362876	0.491639	0.801003	0.998328	0.0301	0.170569	0.316054	0.535117	0.864548	0.603679	0.375209	0.01505	0.232441	0.473244	0.677258	0.998328	0.436455
0.230769	0.444444	0.324786	0.267241	0.163793	0.275862	0.042735	0.264957	0.529915	0.74359	0.991453	0.025641	0.247863	0.521368	0.752137	1	0.008547	0.205128	0.401709	0.700855	0.940171	0.299145	0.333333	0.367521	0.077586	0.043103	0.008621	0.008547	0.102564	0.649573	0.871795	1	0.042735	0.179487	0.264957	0.82906	0.931624	0.273504	0.350427	0.478632	0.57265	0.777778	0.623932	0.37931	0.017094	0.247863	0.435897	0.709402	0.940171	0.435897
0.327696	0.397463	0.274841	0.262712	0.186441	0.226695	0.008457	0.241015	0.454545	0.763214	0.995772	0.004228	0.243129	0.526427	0.744186	1	0.002114	0.247357	0.498943	0.735729	0.991543	0.48203	0.141649	0.376321	0.063559	0.067797	0.016949	0.002114	0.139535	0.53277	0.803383	1	0.008457	0.689218	0.733615	0.854123	0.985201	0.109937	0.251586	0.395349	0.54334	0.983087	0.443975	0.381356	0.006342	0.262156	0.566596	0.718816	0.991543	0.401691
0.279261	0.418891	0.301848	0.218107	0.1893	0.251029	0.01232	0.301848	0.537988	0.813142	0.99384	0.004107	0.215606	0.445585	0.702259	0.989733	0.002053	0.252567	0.50924	0.780287	1	0.449692	0.24846	0.301848	0.08642	0.065844	0.004115	0.002053	0.197125	0.455852	0.708419	1	0.032854	0.223819	0.353183	0.714579	0.991786	0.123203	0.439425	0.609856	0.809035	0.99384	0.652977	0.349794	0.00616	0.25462	0.513347	0.712526	0.995893	0.427105
0.14534	0.472354	0.382306	0.113924	0.085443	0.386076	0.045814	0.222749	0.503949	0.848341	0.99684	0.00316	0.273302	0.516588	0.745656	0.988942	0.00158	0.218009	0.467615	0.736177	1	0.218009	0.083728	0.698262	0.028481	0.06962	0.015823	0.00158	0.262243	0.578199	0.718799	1	0.085308	0.120063	0.382306	0.696682	0.952607	0.004739	0.259084	0.478673	0.766193	0.99684	0.819905	0.18038	0.009479	0.238547	0.480253	0.736177	0.995261	0.453397
0.242105	0.315789	0.442105	0.159574	0.159574	0.276596	0.094737	0.252632	0.557895	0.747368	0.936842	0.021053	0.2	0.536842	0.684211	1	0.010526	0.231579	0.421053	0.715789	0.989474	0.252632	0.031579	0.715789	0.021277	0.042553	0	0.010526	0.094737	0.547368	0.610526	1	0.063158	0.063158	0.063158	0.073684	0.084211	0.105263	0.273684	0.452632	0.810526	0.989474	0.589474	0.319149	0.042105	0.221053	0.431579	0.747368	0.957895	0.294737
0.287709	0.407821	0.304469	0.237762	0.176224	0.239161	0.005587	0.25838	0.506983	0.72486	0.993017	0.00419	0.261173	0.5	0.75	1	0.001397	0.21648	0.490223	0.755587	0.998603	0.480447	0.196927	0.322626	0.07972	0.074126	0.004196	0.001397	0.226257	0.488827	0.72067	1	0.074022	0.248603	0.473464	0.748603	0.972067	0.005587	0.319832	0.546089	0.821229	0.997207	0.664804	0.307692	0.002793	0.22067	0.47067	0.72067	0.997207	0.428771
0.337278	0.372781	0.289941	0.285714	0.208333	0.190476	0.017751	0.230769	0.502959	0.715976	1	0.04142	0.313609	0.538462	0.816568	0.982249	0.005917	0.159763	0.390533	0.704142	0.994083	0.491124	0.384615	0.12426	0.119048	0.02381	0	0.005917	0.360947	0.538462	0.763314	1	0.142012	0.278107	0.621302	0.792899	0.988166	0.017751	0.04142	0.071006	0.100592	0.473373	0.60355	0.369048	0.029586	0.248521	0.497041	0.786982	0.994083	0.39645
0.34384	0.389685	0.266476	0.267241	0.198276	0.201149	0.005731	0.191977	0.498567	0.790831	0.991404	0.008596	0.252149	0.512894	0.713467	1	0.002865	0.297994	0.469914	0.747851	0.997135	0.415473	0.143266	0.441261	0.045977	0.068966	0	0.002865	0.154728	0.326648	0.550143	1	0.13467	0.277937	0.363897	0.498567	0.547278	0.051576	0.581662	0.727794	0.87106	0.994269	0.429799	0.431034	0.060172	0.312321	0.535817	0.767908	0.997135	0.421203
0.397906	0.314136	0.287958	0.278947	0.257895	0.184211	0.010471	0.235602	0.486911	0.691099	0.926702	0.015707	0.225131	0.570681	0.801047	0.994764	0.005236	0.251309	0.471204	0.780105	1	0.403141	0.026178	0.570681	0.015789	0.1	0.005263	0.005236	0.17801	0.502618	0.790576	1	0.712042	0.712042	0.717277	0.722513	0.82199	0.036649	0.267016	0.455497	0.643979	0.989529	0.366492	0.463158	0.031414	0.267016	0.47644	0.717277	0.984293	0.324607
0.310734	0.361582	0.327684	0.1875	0.210227	0.272727	0.028249	0.20904	0.474576	0.728814	0.99435	0.016949	0.225989	0.491525	0.734463	1	0.00565	0.254237	0.519774	0.768362	0.988701	0.367232	0.107345	0.525424	0.039773	0.073864	0.005682	0.00565	0.180791	0.502825	0.615819	1	0.045198	0.372881	0.514124	0.632768	0.661017	0.056497	0.231638	0.446328	0.79096	0.966102	0.536723	0.329545	0.011299	0.237288	0.514124	0.774011	0.983051	0.418079
0.391198	0.290954	0.317848	0.203431	0.240196	0.203431	0.00489	0.210269	0.454768	0.706601	1	0.007335	0.273839	0.525672	0.757946	0.982885	0.002445	0.268949	0.542787	0.779951	0.99511	0.572127	0.136919	0.290954	0.063725	0.068627	0	0.002445	0.234719	0.513447	0.762836	1	0.02934	0.188264	0.400978	0.589242	0.9022	0.04401	0.283619	0.537897	0.867971	0.99511	0.506112	0.343137	0.017115	0.283619	0.498778	0.745721	0.97555	0.310513
0.289474	0.406015	0.304511	0.256604	0.158491	0.279245	0.011278	0.270677	0.526316	0.759398	0.992481	0.007519	0.236842	0.473684	0.725564	0.996241	0.003759	0.221805	0.484962	0.733083	1	0.454887	0.191729	0.353383	0.090566	0.067925	0	0.003759	0.206767	0.466165	0.74812	1	0.056391	0.293233	0.484962	0.631579	0.860902	0.015038	0.25188	0.541353	0.770677	0.93985	0.556391	0.445283	0.015038	0.229323	0.462406	0.699248	0.988722	0.424812
0.358382	0.317919	0.323699	0.257971	0.214493	0.176812	0.008671	0.257225	0.5	0.728324	1	0.020231	0.225434	0.491329	0.742775	0.99711	0.00289	0.277457	0.50289	0.797688	0.991329	0.410405	0.15896	0.430636	0.072464	0.084058	0.002899	0.00289	0.297688	0.534682	0.731214	1	0.112717	0.228324	0.447977	0.50289	0.959538	0.037572	0.219653	0.627168	0.797688	0.985549	0.560694	0.307246	0.031792	0.225434	0.450867	0.786127	0.991329	0.381503
0.327001	0.29308	0.379919	0.194293	0.225543	0.235054	0.008141	0.264586	0.51289	0.742198	1	0.004071	0.230665	0.48711	0.765265	0.998643	0.001357	0.251018	0.492537	0.747626	0.994573	0.355495	0.127544	0.516961	0.048913	0.103261	0.013587	0.001357	0.2673	0.550882	0.766621	1	0.081411	0.458616	0.686567	0.729986	0.986431	0.008141	0.215739	0.41384	0.744912	0.982361	0.598372	0.432065	0.002714	0.261872	0.499322	0.751696	0.986431	0.299864
0.153153	0.423423	0.423423	0.131222	0.122172	0.38009	0.130631	0.247748	0.540541	0.891892	0.986486	0.009009	0.234234	0.481982	0.72973	1	0.004505	0.238739	0.504505	0.693694	0.995495	0.252252	0.013514	0.734234	0.00905	0.081448	0	0.004505	0.202703	0.40991	0.90991	1	0.504505	0.504505	0.504505	0.509009	0.513514	0.009009	0.256757	0.54955	0.734234	0.954955	0.698198	0.171946	0.013514	0.220721	0.45045	0.698198	0.936937	0.414414
0.377358	0.308176	0.314465	0.253165	0.221519	0.21519	0.018868	0.226415	0.415094	0.666667	1	0.012579	0.320755	0.528302	0.779874	0.993711	0.006289	0.201258	0.503145	0.698113	0.987421	0.383648	0.18239	0.433962	0.044304	0.056962	0.006329	0.006289	0.238994	0.484277	0.798742	1	0.018868	0.056604	0.27673	0.446541	0.559748	0.132075	0.314465	0.610063	0.735849	0.899371	0.515723	0.329114	0.025157	0.283019	0.534591	0.72956	0.987421	0.320755
0.281159	0.386473	0.332367	0.190522	0.204062	0.258221	0.004831	0.228986	0.497585	0.737198	0.996135	0.001932	0.275362	0.490821	0.7343	0.999034	0.000966	0.227053	0.528502	0.771014	1	0.555556	0.228019	0.216425	0.088008	0.047389	0.004836	0.000966	0.243478	0.438647	0.715942	1	0.03285	0.17971	0.386473	0.512077	0.8	0.004831	0.552657	0.75942	0.891787	0.994203	0.53913	0.377176	0.003865	0.219324	0.497585	0.755556	0.993237	0.404831
0.36214	0.329218	0.308642	0.235537	0.210744	0.169421	0.012346	0.238683	0.510288	0.753086	0.99177	0.020576	0.209877	0.469136	0.716049	0.962963	0.004115	0.255144	0.518519	0.740741	1	0.378601	0.152263	0.469136	0.07438	0.090909	0	0.004115	0.176955	0.411523	0.699588	1	0.016461	0.304527	0.432099	0.654321	0.814815	0.078189	0.271605	0.580247	0.781893	0.979424	0.588477	0.38843	0.00823	0.255144	0.489712	0.695473	0.979424	0.316872
0.359155	0.340962	0.299883	0.236054	0.200235	0.204345	0.003521	0.248239	0.504108	0.766432	1	0.001174	0.221244	0.482981	0.724178	0.994131	0.000587	0.286972	0.519366	0.746479	0.999413	0.535798	0.139671	0.324531	0.062243	0.069289	0.004698	0.000587	0.195423	0.454812	0.746479	1	0.003521	0.318075	0.546948	0.780516	0.890845	0.005282	0.335094	0.579812	0.751174	0.998826	0.496479	0.368761	0.002347	0.281103	0.510563	0.725352	0.995892	0.36385
0.292398	0.383041	0.324561	0.202346	0.211144	0.231672	0.005848	0.274854	0.535088	0.777778	1	0.02924	0.248538	0.505848	0.754386	0.994152	0.002924	0.181287	0.461988	0.719298	0.973684	0.415205	0.169591	0.415205	0.076246	0.087977	0.005865	0.002924	0.248538	0.488304	0.80117	1	0.073099	0.307018	0.491228	0.733918	0.979532	0.005848	0.204678	0.535088	0.707602	0.991228	0.634503	0.363636	0.008772	0.230994	0.497076	0.730994	0.98538	0.380117
0.331675	0.320066	0.348259	0.182724	0.234219	0.219269	0.008292	0.321725	0.527363	0.772803	1	0.006633	0.175788	0.434494	0.68325	0.993367	0.001658	0.260365	0.502488	0.781095	0.998342	0.391376	0.243781	0.364842	0.101329	0.054817	0.008306	0.001658	0.218905	0.484245	0.759536	1	0.00995	0.210614	0.412935	0.756219	0.998342	0.023217	0.339967	0.507463	0.706468	0.958541	0.626866	0.408638	0.004975	0.243781	0.502488	0.751244	0.995025	0.333333
0.232365	0.431535	0.3361	0.229167	0.158333	0.2625	0.078838	0.278008	0.543568	0.813278	1	0.008299	0.244813	0.456432	0.692946	0.975104	0.004149	0.224066	0.510373	0.763485	0.991701	0.431535	0.190871	0.377593	0.083333	0.083333	0	0.004149	0.20332	0.46473	0.726141	1	0.033195	0.219917	0.477178	0.643154	0.937759	0.020747	0.294606	0.539419	0.788382	0.991701	0.589212	0.383333	0.020747	0.232365	0.502075	0.742739	0.991701	0.473029
0.342857	0.47619	0.180952	0.282297	0.119617	0.167464	0.019048	0.280952	0.452381	0.738095	0.985714	0.014286	0.271429	0.580952	0.761905	0.995238	0.004762	0.157143	0.328571	0.547619	1	0.709524	0.061905	0.228571	0.033493	0.07177	0.014354	0.004762	0.309524	0.538095	0.738095	1	0.02381	0.166667	0.390476	0.780952	0.8	0.071429	0.22381	0.380952	0.657143	0.971429	0.247619	0.325359	0.02381	0.228571	0.390476	0.657143	0.957143	0.471429
0.336538	0.298077	0.365385	0.252427	0.252427	0.165049	0.028846	0.269231	0.509615	0.740385	0.990385	0.086538	0.211538	0.490385	0.701923	1	0.009615	0.221154	0.423077	0.711538	0.951923	0.355769	0.365385	0.278846	0.087379	0.029126	0.029126	0.009615	0.173077	0.355769	0.759615	1	0.038462	0.115385	0.423077	0.817308	0.961538	0.278846	0.5	0.567308	0.653846	0.730769	0.548077	0.446602	0.038462	0.240385	0.451923	0.673077	0.971154	0.278846
0.30721	0.394984	0.297806	0.257862	0.201258	0.226415	0.012539	0.22884	0.517241	0.742947	0.996865	0.009404	0.288401	0.489028	0.727273	0.981191	0.003135	0.194357	0.495298	0.758621	1	0.532915	0.338558	0.128527	0.119497	0.031447	0.012579	0.003135	0.181818	0.479624	0.714734	1	0.050157	0.360502	0.517241	0.805643	0.99373	0.031348	0.310345	0.426332	0.623824	0.865204	0.62069	0.402516	0.018809	0.23511	0.482759	0.755486	0.990596	0.38558
0.301818	0.385455	0.312727	0.20438	0.178832	0.277372	0.025455	0.261818	0.578182	0.803636	1	0.007273	0.229091	0.450909	0.734545	0.996364	0.003636	0.218182	0.461818	0.712727	0.949091	0.367273	0.134545	0.498182	0.080292	0.094891	0	0.003636	0.214545	0.530909	0.694545	1	0.072727	0.185455	0.458182	0.636364	0.843636	0.021818	0.269091	0.487273	0.803636	0.974545	0.585455	0.372263	0.021818	0.236364	0.469091	0.709091	0.974545	0.407273
0.137615	0.449541	0.412844	0.113497	0.104294	0.365031	0.006116	0.247706	0.452599	0.675841	1	0.018349	0.244648	0.492355	0.779817	0.993884	0.003058	0.238532	0.498471	0.715596	0.996942	0.253823	0.067278	0.678899	0.02454	0.09816	0.006135	0.003058	0.296636	0.455657	0.657492	1	0.189602	0.434251	0.776758	0.792049	0.990826	0.009174	0.232416	0.51682	0.727829	0.963303	0.807339	0.202454	0.009174	0.266055	0.498471	0.727829	0.990826	0.452599
0.278261	0.411594	0.310145	0.203488	0.171512	0.261628	0.028986	0.388406	0.637681	0.797101	1	0.005797	0.226087	0.455072	0.721739	0.976812	0.002899	0.194203	0.405797	0.652174	0.997101	0.295652	0.04058	0.663768	0.017442	0.087209	0	0.002899	0.376812	0.747826	0.843478	1	0.365217	0.371014	0.605797	0.846377	0.857971	0.005797	0.194203	0.428986	0.594203	0.991304	0.655072	0.313953	0.008696	0.197101	0.391304	0.608696	0.965217	0.391304
0.375887	0.276596	0.347518	0.242857	0.271429	0.171429	0.021277	0.241135	0.460993	0.687943	0.992908	0.014184	0.234043	0.503546	0.723404	0.971631	0.007092	0.219858	0.468085	0.787234	1	0.588652	0.304965	0.106383	0.107143	0.064286	0.007143	0.007092	0.255319	0.510638	0.737589	1	0.028369	0.404255	0.546099	0.829787	0.957447	0.099291	0.113475	0.156028	0.198582	0.609929	0.524823	0.371429	0.028369	0.29078	0.496454	0.808511	0.964539	0.333333
0.332813	0.375	0.292187	0.198748	0.186228	0.239437	0.003125	0.196875	0.479687	0.764062	0.995313	0.004687	0.259375	0.492188	0.729688	0.996875	0.001563	0.310937	0.514062	0.745313	1	0.551562	0.054688	0.39375	0.032864	0.067293	0.001565	0.001563	0.271875	0.609375	0.839063	1	0.010937	0.215625	0.653125	0.775	0.96875	0.03125	0.1625	0.446875	0.567187	0.909375	0.43125	0.388106	0.007812	0.315625	0.514062	0.704688	0.99375	0.385937
0.31829	0.351544	0.330166	0.195238	0.204762	0.247619	0.009501	0.244656	0.470309	0.726841	0.992874	0.007126	0.315914	0.543943	0.76247	0.997625	0.002375	0.2019	0.444181	0.703088	1	0.496437	0.268409	0.235154	0.090476	0.042857	0.004762	0.002375	0.36342	0.541568	0.745843	1	0.016627	0.296912	0.579572	0.783848	0.966746	0.04038	0.095012	0.206651	0.543943	0.995249	0.494062	0.342857	0.007126	0.289786	0.546318	0.788599	0.995249	0.361045
0.219081	0.473498	0.30742	0.20922	0.138298	0.265957	0.088339	0.342756	0.618375	0.823322	0.985866	0.010601	0.233216	0.469965	0.706714	0.989399	0.003534	0.187279	0.44523	0.738516	1	0.636042	0.243816	0.120141	0.113475	0.035461	0.007092	0.003534	0.349823	0.575972	0.784452	1	0.081272	0.328622	0.526502	0.724382	0.971731	0.007067	0.031802	0.074205	0.141343	0.204947	0.568905	0.404255	0.014134	0.243816	0.44523	0.720848	0.989399	0.501767
0.28743	0.355484	0.357086	0.185096	0.189904	0.248397	0.001601	0.306645	0.523619	0.782226	0.998399	0.003203	0.193755	0.466773	0.736589	1	0.000801	0.259408	0.510008	0.708567	0.999199	0.39952	0.109688	0.490793	0.041667	0.065705	0.001603	0.000801	0.161729	0.496397	0.818255	1	0.005604	0.365092	0.465973	0.869496	0.992794	0.026421	0.253002	0.532426	0.698159	0.967974	0.611689	0.280449	0.002402	0.220176	0.449159	0.718975	0.992794	0.357886
0.346154	0.286325	0.367521	0.23176	0.27897	0.180258	0.008547	0.213675	0.478632	0.713675	1	0.021368	0.209402	0.495726	0.735043	0.987179	0.004274	0.299145	0.538462	0.769231	0.995726	0.495726	0.24359	0.260684	0.090129	0.04721	0.004292	0.004274	0.307692	0.512821	0.74359	1	0.008547	0.141026	0.388889	0.547009	0.978632	0.059829	0.217949	0.594017	0.850427	0.918803	0.525641	0.403433	0.012821	0.247863	0.474359	0.709402	0.982906	0.354701
0.269877	0.478163	0.25196	0.245516	0.117713	0.247758	0.005599	0.238522	0.426652	0.683091	0.986562	0.003359	0.237402	0.494961	0.761478	0.996641	0.00112	0.294513	0.581187	0.743561	1	0.666293	0.078387	0.255319	0.042601	0.069507	0.004484	0.00112	0.207167	0.412094	0.7514	1	0.066069	0.262038	0.56327	0.870101	0.99888	0.004479	0.522956	0.641657	0.731243	0.947368	0.418813	0.338565	0.007839	0.349384	0.620381	0.778275	0.995521	0.520717
0.353516	0.318359	0.328125	0.203523	0.227006	0.213307	0.005859	0.279297	0.503906	0.734375	0.992188	0.003906	0.197266	0.480469	0.773438	1	0.001953	0.248047	0.501953	0.736328	0.984375	0.353516	0.146484	0.5	0.050881	0.082192	0.015656	0.001953	0.283203	0.480469	0.726562	1	0.082031	0.214844	0.34375	0.777344	0.990234	0.007812	0.238281	0.503906	0.751953	0.988281	0.542969	0.399217	0.007812	0.212891	0.46875	0.689453	0.984375	0.328125
0.319328	0.386555	0.294118	0.223629	0.189873	0.244726	0.008403	0.289916	0.483193	0.768908	0.983193	0.012605	0.231092	0.504202	0.756303	1	0.004202	0.247899	0.487395	0.714286	0.991597	0.512605	0.142857	0.344538	0.07173	0.07173	0.004219	0.004202	0.239496	0.495798	0.697479	1	0.02521	0.071429	0.663866	0.735294	0.823529	0.07563	0.277311	0.386555	0.890756	0.995798	0.596639	0.43038	0.021008	0.256303	0.478992	0.710084	0.987395	0.39916
0.280232	0.401883	0.317886	0.216667	0.174638	0.267391	0.002896	0.249095	0.490949	0.748009	0.997828	0.001448	0.256336	0.511948	0.768284	0.996379	0.000724	0.230992	0.485156	0.732802	1	0.454019	0.129616	0.416365	0.055072	0.086957	0.007246	0.000724	0.302679	0.542361	0.792904	1	0.03693	0.224475	0.474294	0.765387	0.999276	0.002896	0.183201	0.465605	0.716872	0.989138	0.672701	0.32029	0.005069	0.280232	0.52643	0.759594	0.995655	0.388849
0.382883	0.36036	0.256757	0.280543	0.167421	0.180995	0.022523	0.306306	0.527027	0.707207	1	0.009009	0.243243	0.459459	0.797297	0.995495	0.004505	0.099099	0.481982	0.738739	0.986486	0.59009	0.040541	0.369369	0.027149	0.090498	0	0.004505	0.427928	0.612613	0.801802	1	0.833333	0.837838	0.927928	0.959459	0.972973	0.031532	0.130631	0.301802	0.400901	0.873874	0.531532	0.425339	0.031532	0.261261	0.531532	0.720721	0.986486	0.369369
0.307692	0.384615	0.307692	0.193548	0.167742	0.296774	0.025641	0.237179	0.487179	0.820513	0.961538	0.012821	0.307692	0.50641	0.730769	0.99359	0.00641	0.217949	0.455128	0.679487	1	0.679487	0.205128	0.115385	0.103226	0.03871	0	0.00641	0.262821	0.49359	0.814103	1	0.070513	0.128205	0.429487	0.525641	0.891026	0.301282	0.320513	0.621795	0.74359	0.775641	0.519231	0.425806	0.032051	0.25641	0.519231	0.666667	0.987179	0.397436
0.367816	0.307471	0.324713	0.233429	0.262248	0.170029	0.005747	0.204023	0.431034	0.735632	0.994253	0.020115	0.307471	0.560345	0.767241	0.997126	0.002874	0.270115	0.511494	0.741379	1	0.439655	0.152299	0.408046	0.057637	0.10951	0.005764	0.002874	0.183908	0.5	0.712644	1	0.063218	0.192529	0.241379	0.367816	0.566092	0.08908	0.41092	0.66954	0.818966	0.988506	0.566092	0.357349	0.011494	0.324713	0.528736	0.695402	0.985632	0.278736
0.309645	0.309645	0.380711	0.153061	0.280612	0.193878	0.010152	0.269036	0.527919	0.786802	1	0.025381	0.248731	0.401015	0.64467	0.969543	0.005076	0.228426	0.48731	0.746193	0.994924	0.350254	0.263959	0.385787	0.102041	0.091837	0	0.005076	0.253807	0.375635	0.619289	1	0.015228	0.091371	0.28934	0.741117	0.994924	0.208122	0.532995	0.659898	0.807107	0.959391	0.619289	0.397959	0.020305	0.243655	0.472081	0.730964	0.994924	0.304569
0.347222	0.395833	0.256944	0.226481	0.212544	0.243902	0.017361	0.180556	0.4375	0.722222	0.982639	0.006944	0.277778	0.496528	0.736111	1	0.003472	0.267361	0.569444	0.774306	0.996528	0.600694	0.086806	0.3125	0.052265	0.108014	0.003484	0.003472	0.309028	0.517361	0.753472	1	0.190972	0.440972	0.708333	0.857639	0.993056	0.041667	0.135417	0.371528	0.579861	0.961806	0.361111	0.383275	0.041667	0.232639	0.454861	0.739583	0.989583	0.409722
0.25974	0.324675	0.415584	0.171053	0.157895	0.302632	0.025974	0.38961	0.532468	0.675325	1	0.064935	0.285714	0.597403	0.779221	0.987013	0.012987	0.142857	0.363636	0.662338	0.974026	0.441558	0.168831	0.38961	0.026316	0.026316	0.052632	0.012987	0.662338	0.779221	0.883117	1	0.038961	0.064935	0.116883	0.155844	0.272727	0.077922	0.350649	0.454545	0.545455	0.649351	0.532468	0.342105	0.038961	0.155844	0.285714	0.558442	0.974026	0.415584
0.290155	0.393782	0.316062	0.197917	0.192708	0.28125	0.010363	0.186528	0.409326	0.875648	1	0.051813	0.290155	0.523316	0.766839	0.974093	0.005181	0.227979	0.476684	0.678756	0.984456	0.549223	0.357513	0.093264	0.145833	0.041667	0	0.005181	0.284974	0.569948	0.860104	1	0.088083	0.264249	0.497409	0.699482	0.839378	0.025907	0.041451	0.067358	0.326425	0.590674	0.549223	0.333333	0.020725	0.259067	0.533679	0.678756	0.984456	0.445596
0.294484	0.342527	0.362989	0.195372	0.200267	0.2332	0.000445	0.232206	0.483541	0.746441	0.999555	0.00089	0.272687	0.51468	0.765569	1	0.003114	0.242883	0.492438	0.737989	0.995552	0.328737	0.040036	0.631228	0.019137	0.093013	0.004895	0.000445	0.227313	0.525801	0.765569	1	0.004893	0.133452	0.494217	0.726423	0.995552	0.001779	0.27669	0.487544	0.747331	0.997331	0.560943	0.393413	0.003114	0.257117	0.516014	0.75	0.996886	0.360765
0.219858	0.411348	0.368794	0.208531	0.127962	0.281991	0.01182	0.245863	0.479905	0.78487	0.985816	0.004728	0.217494	0.513002	0.754137	1	0.002364	0.262411	0.484634	0.725768	0.995272	0.44208	0.040189	0.51773	0.014218	0.042654	0.004739	0.002364	0.108747	0.49409	0.874704	1	0.356974	0.44208	0.829787	0.981087	0.992908	0.113475	0.257683	0.43026	0.690307	0.869976	0.586288	0.156398	0.014184	0.245863	0.41844	0.718676	0.995272	0.43026
0.332565	0.43804	0.229395	0.261822	0.167243	0.196655	0.001153	0.336023	0.564265	0.786744	0.998847	0.002882	0.194236	0.447839	0.71585	1	0.000576	0.259942	0.492219	0.770605	0.999424	0.677233	0.09683	0.225937	0.055363	0.064591	0.010381	0.000576	0.220173	0.466859	0.685879	1	0.023631	0.254179	0.440346	0.770605	0.971182	0.001729	0.402305	0.666282	0.895101	0.998847	0.361383	0.392157	0.001729	0.231124	0.497983	0.770029	0.999424	0.43804
0.342697	0.289326	0.367978	0.177465	0.261972	0.216901	0.005618	0.230337	0.491573	0.772472	0.994382	0.019663	0.233146	0.494382	0.716292	0.955056	0.002809	0.258427	0.497191	0.786517	1	0.300562	0.123596	0.575843	0.050704	0.090141	0	0.002809	0.252809	0.466292	0.744382	1	0.008427	0.092697	0.314607	0.516854	0.766854	0.036517	0.272472	0.561798	0.789326	0.997191	0.648876	0.394366	0.008427	0.238764	0.502809	0.741573	0.997191	0.261236
0.42562	0.376033	0.198347	0.244813	0.107884	0.161826	0.061983	0.31405	0.5	0.727273	1	0.008264	0.169421	0.512397	0.780992	0.987603	0.004132	0.173554	0.326446	0.743802	0.991736	0.68595	0.016529	0.297521	0.012448	0.095436	0.004149	0.004132	0.355372	0.557851	0.747934	1	0.18595	0.18595	0.190083	0.194215	0.789256	0.016529	0.119835	0.31405	0.669421	0.933884	0.326446	0.248963	0.012397	0.099174	0.318182	0.652893	0.975207	0.371901
0.275087	0.408304	0.316609	0.2513	0.169844	0.272097	0.031142	0.294118	0.517301	0.742215	1	0.00346	0.230104	0.480969	0.726644	0.99827	0.00173	0.211073	0.487889	0.785467	0.991349	0.49827	0.361592	0.140138	0.142114	0.041594	0	0.00173	0.301038	0.539792	0.740484	1	0.051903	0.224913	0.474048	0.686851	0.951557	0.00519	0.038062	0.366782	0.858131	0.989619	0.622837	0.322357	0.00692	0.231834	0.49481	0.782007	0.989619	0.377163
0.306283	0.329843	0.363874	0.186352	0.217848	0.251969	0.007853	0.191099	0.447644	0.735602	0.958115	0.005236	0.282723	0.510471	0.746073	1	0.002618	0.246073	0.520942	0.753927	0.997382	0.531414	0.36911	0.099476	0.120735	0.020997	0	0.002618	0.26178	0.492147	0.746073	1	0.167539	0.395288	0.60733	0.787958	0.994764	0.007853	0.054974	0.089005	0.112565	0.146597	0.599476	0.314961	0.018325	0.303665	0.526178	0.732984	0.997382	0.384817
0.272059	0.419118	0.308824	0.214815	0.2	0.244444	0.044118	0.169118	0.455882	0.661765	0.992647	0.022059	0.272059	0.529412	0.779412	0.955882	0.007353	0.235294	0.463235	0.720588	1	0.382353	0.301471	0.316176	0.088889	0.059259	0	0.007353	0.205882	0.411765	0.823529	1	0.257353	0.360294	0.455882	0.727941	0.985294	0.073529	0.139706	0.566176	0.647059	0.816176	0.492647	0.37037	0.022059	0.286765	0.455882	0.698529	0.970588	0.411765
0.341969	0.34456	0.313472	0.18961	0.223377	0.257143	0.007772	0.277202	0.536269	0.779793	1	0.012953	0.243523	0.466321	0.699482	0.992228	0.002591	0.202073	0.484456	0.764249	0.989637	0.440415	0.15544	0.404145	0.090909	0.080519	0.002597	0.002591	0.246114	0.481865	0.743523	1	0.134715	0.264249	0.458549	0.603627	0.84715	0.041451	0.233161	0.564767	0.800518	0.992228	0.647668	0.337662	0.005181	0.240933	0.463731	0.689119	0.989637	0.323834
0.248619	0.513812	0.237569	0.183333	0.15	0.211111	0.038674	0.281768	0.535912	0.734807	0.944751	0.01105	0.176796	0.370166	0.651934	1	0.005525	0.392265	0.624309	0.79558	0.994475	0.712707	0.127072	0.160221	0.044444	0.044444	0	0.005525	0.176796	0.353591	0.61326	1	0.513812	0.535912	0.767956	0.933702	0.966851	0.370166	0.441989	0.696133	0.850829	0.895028	0.298343	0.333333	0.149171	0.430939	0.685083	0.79558	0.966851	0.558011
0.338875	0.38491	0.276215	0.245839	0.189501	0.213828	0.002558	0.249361	0.485934	0.696931	0.996164	0.011509	0.258312	0.517903	0.80179	1	0.001279	0.230179	0.484655	0.745524	0.998721	0.558824	0.318414	0.122762	0.107554	0.035851	0.002561	0.001279	0.258312	0.524297	0.805627	1	0.035806	0.200767	0.388747	0.571611	0.933504	0.002558	0.554987	0.777494	0.900256	0.987212	0.505115	0.353393	0.002558	0.237852	0.512788	0.7289	0.987212	0.401535
0.440204	0.274809	0.284987	0.19898	0.244898	0.17602	0.005089	0.249364	0.468193	0.717557	0.987277	0.007634	0.21883	0.506361	0.806616	1	0.002545	0.236641	0.531807	0.776081	0.994911	0.483461	0.025445	0.491094	0.017857	0.104592	0.002551	0.002545	0.195929	0.40458	0.773537	1	0.015267	0.236641	0.872774	0.877863	0.885496	0.025445	0.302799	0.587786	0.709924	0.989822	0.379135	0.367347	0.012723	0.267176	0.559796	0.821883	0.994911	0.318066
0.313261	0.479702	0.207037	0.23155	0.150305	0.170616	0.001353	0.20433	0.453315	0.650203	0.996617	0.00203	0.271313	0.494587	0.836265	0.998647	0.000677	0.302436	0.552097	0.688769	1	0.655616	0.050744	0.29364	0.024374	0.05281	0.004062	0.000677	0.322057	0.539919	0.82747	1	0.085927	0.258457	0.652909	0.700271	0.999323	0.010825	0.198241	0.326793	0.588633	0.839648	0.401894	0.377793	0.010825	0.279432	0.564276	0.776725	0.997294	0.465494
0.318841	0.357488	0.323671	0.218447	0.199029	0.208738	0.009662	0.289855	0.502415	0.73913	0.990338	0.033816	0.222222	0.52657	0.714976	0.985507	0.004831	0.202899	0.463768	0.768116	1	0.584541	0.256039	0.15942	0.101942	0.033981	0.004854	0.004831	0.304348	0.594203	0.816425	1	0.014493	0.21256	0.47343	0.676329	0.966184	0.048309	0.26087	0.347826	0.386473	0.507246	0.502415	0.368932	0.014493	0.241546	0.47343	0.763285	0.985507	0.429952
0.341935	0.356989	0.301075	0.25	0.211207	0.230603	0.006452	0.208602	0.44086	0.752688	0.991398	0.004301	0.277419	0.513978	0.729032	1	0.002151	0.255914	0.51828	0.772043	0.997849	0.419355	0.303226	0.277419	0.099138	0.068966	0.008621	0.002151	0.180645	0.449462	0.729032	1	0.167742	0.468817	0.595699	0.713978	0.875269	0.047312	0.197849	0.322581	0.913978	0.989247	0.595699	0.396552	0.012903	0.329032	0.546237	0.744086	0.989247	0.348387
0.328632	0.318759	0.352609	0.214689	0.237288	0.218927	0.005642	0.239774	0.499295	0.727786	0.99859	0.008463	0.301834	0.558533	0.77433	1	0.00141	0.214386	0.441467	0.712271	0.995769	0.427362	0.118477	0.454161	0.050847	0.076271	0.00565	0.00141	0.306065	0.583921	0.794076	1	0.06488	0.51622	0.737659	0.892807	0.96897	0.002821	0.204513	0.369535	0.609309	0.997179	0.607898	0.353107	0.004231	0.245416	0.486601	0.733427	0.995769	0.332863
0.182432	0.391892	0.425676	0.132203	0.138983	0.352542	0.016892	0.094595	0.496622	0.756757	0.993243	0.006757	0.256757	0.47973	0.716216	1	0.003378	0.280405	0.510135	0.773649	0.97973	0.222973	0.003378	0.773649	0.00339	0.071186	0.00339	0.003378	0.195946	0.378378	0.790541	1	0.219595	0.219595	0.219595	0.219595	0.219595	0.02027	0.304054	0.530405	0.739865	0.989865	0.712838	0.176271	0.02027	0.320946	0.537162	0.75	0.976351	0.381757
0.198556	0.409747	0.391697	0.175407	0.135624	0.312839	0.00361	0.220217	0.474729	0.740072	0.99639	0.009025	0.222022	0.519856	0.763538	0.994585	0.001805	0.261733	0.467509	0.723827	1	0.310469	0.01083	0.6787	0.014467	0.083183	0	0.001805	0.294224	0.512635	0.82491	1	0.023466	0.023466	0.027076	0.032491	0.99639	0.039711	0.249097	0.49278	0.720217	0.983755	0.722022	0.169982	0.005415	0.252708	0.483755	0.712996	0.99278	0.415162
0.295337	0.388601	0.316062	0.21875	0.213542	0.28125	0.020725	0.316062	0.554404	0.766839	1	0.010363	0.207254	0.409326	0.715026	0.984456	0.005181	0.259067	0.523316	0.735751	0.989637	0.430052	0.362694	0.207254	0.09375	0.03125	0	0.005181	0.279793	0.450777	0.746114	1	0.259067	0.481865	0.601036	0.860104	0.979275	0.020725	0.067358	0.119171	0.19171	0.704663	0.466321	0.5	0.025907	0.165803	0.481865	0.689119	0.979275	0.450777
0.268174	0.437399	0.294426	0.215354	0.150707	0.265859	0.015751	0.298869	0.538772	0.775848	0.999192	0.001212	0.218094	0.452746	0.72496	1	0.000404	0.293215	0.521405	0.762924	0.999596	0.683764	0.212439	0.103796	0.086465	0.033939	0.003232	0.000404	0.220921	0.45517	0.74475	1	0.013732	0.327948	0.509693	0.684976	0.983037	0.026656	0.421244	0.609451	0.880856	0.999192	0.486672	0.376566	0.001212	0.263328	0.512924	0.73748	0.998788	0.486672
0.242938	0.440678	0.316384	0.198864	0.181818	0.278409	0.056497	0.248588	0.463277	0.79096	1	0.011299	0.242938	0.457627	0.689266	0.988701	0.00565	0.214689	0.519774	0.80791	0.99435	0.40113	0.19209	0.40678	0.068182	0.068182	0	0.00565	0.175141	0.435028	0.672316	1	0.050847	0.141243	0.468927	0.689266	0.909605	0.090395	0.293785	0.60452	0.813559	0.988701	0.536723	0.420455	0.050847	0.282486	0.553672	0.762712	0.983051	0.468927
0.343066	0.291971	0.364964	0.221951	0.25122	0.229268	0.034063	0.257908	0.479319	0.739659	0.997567	0.004866	0.214112	0.527981	0.756691	1	0.002433	0.233577	0.46472	0.737226	0.990268	0.46472	0.253041	0.282238	0.085366	0.046341	0.002439	0.002433	0.209246	0.518248	0.76399	1	0.058394	0.579075	0.739659	0.895377	0.990268	0.075426	0.218978	0.328467	0.440389	0.725061	0.510949	0.380488	0.009732	0.270073	0.559611	0.739659	0.990268	0.321168
0.314121	0.345821	0.340058	0.219653	0.234104	0.219653	0.008646	0.216138	0.51585	0.772334	1	0.005764	0.224784	0.43804	0.697406	0.985591	0.002882	0.302594	0.530259	0.760807	0.994236	0.443804	0.221902	0.334294	0.083815	0.083815	0.008671	0.002882	0.170029	0.389049	0.685879	1	0.138329	0.201729	0.585014	0.755043	0.979827	0.043228	0.409222	0.536023	0.772334	0.976945	0.524496	0.393064	0.014409	0.276657	0.510086	0.697406	0.994236	0.391931
0.281385	0.502165	0.21645	0.2	0.130435	0.156522	0.017316	0.121212	0.402597	0.692641	0.974026	0.008658	0.307359	0.536797	0.753247	0.991342	0.004329	0.190476	0.489177	0.766234	1	0.636364	0.12987	0.233766	0.047826	0.056522	0.004348	0.004329	0.285714	0.445887	0.692641	1	0.103896	0.12987	0.194805	0.489177	0.969697	0.025974	0.225108	0.757576	0.813853	0.874459	0.419913	0.330435	0.012987	0.225108	0.471861	0.65368	0.974026	0.562771
0.391304	0.304348	0.304348	0.285714	0.241758	0.175824	0.065217	0.23913	0.51087	0.75	0.98913	0.021739	0.152174	0.532609	0.695652	0.923913	0.01087	0.304348	0.467391	0.793478	1	0.48913	0.108696	0.402174	0.065934	0.065934	0	0.01087	0.119565	0.336957	0.565217	1	0.173913	0.184783	0.217391	0.304348	0.391304	0.434783	0.521739	0.684783	0.826087	0.934783	0.456522	0.417582	0.043478	0.282609	0.413043	0.597826	0.967391	0.391304
0.31875	0.4	0.28125	0.245283	0.157233	0.226415	0.0125	0.1625	0.3625	0.6125	0.99375	0.04375	0.33125	0.55625	0.8	1	0.00625	0.2125	0.475	0.76875	0.95	0.40625	0.1375	0.45625	0.050314	0.075472	0	0.00625	0.2625	0.5	0.76875	1	0.01875	0.04375	0.45	0.48125	0.675	0.0875	0.325	0.55	0.775	0.95	0.53125	0.377358	0.01875	0.25625	0.55625	0.8125	0.98125	0.4125
0.357447	0.319149	0.323404	0.24359	0.286325	0.205128	0.008511	0.268085	0.480851	0.714894	0.982979	0.021277	0.212766	0.485106	0.706383	1	0.004255	0.234043	0.519149	0.817021	0.995745	0.382979	0.268085	0.348936	0.07265	0.047009	0.012821	0.004255	0.357447	0.519149	0.706383	1	0.017021	0.493617	0.582979	0.791489	0.974468	0.021277	0.106383	0.259574	0.740426	0.944681	0.459574	0.478632	0.012766	0.217021	0.47234	0.689362	0.991489	0.33617
0.174603	0.365079	0.460317	0.112903	0.241935	0.451613	0.031746	0.142857	0.68254	0.84127	0.952381	0.063492	0.253968	0.428571	0.634921	1	0.015873	0.190476	0.412698	0.714286	0.984127	0.52381	0.063492	0.412698	0.032258	0.064516	0	0.015873	0.460317	0.587302	0.793651	1	0.920635	0.920635	0.936508	0.952381	0.968254	0.079365	0.15873	0.269841	0.365079	0.746032	0.68254	0.354839	0.047619	0.206349	0.380952	0.571429	0.968254	0.47619
0.179104	0.522388	0.298507	0.2	0.11	0.255	0.00995	0.273632	0.542289	0.736318	0.9801	0.014925	0.248756	0.497512	0.741294	1	0.004975	0.189055	0.467662	0.756219	0.985075	0.502488	0.144279	0.353234	0.04	0.09	0.01	0.004975	0.218905	0.427861	0.776119	1	0.169154	0.338308	0.542289	0.691542	0.810945	0.024876	0.283582	0.492537	0.661692	0.99005	0.616915	0.35	0.014925	0.243781	0.537313	0.726368	0.99005	0.537313
0.38118	0.318979	0.299841	0.22524	0.247604	0.191693	0.015949	0.240829	0.486443	0.730463	0.995215	0.00319	0.248804	0.488038	0.763955	1	0.001595	0.266348	0.527911	0.759171	0.998405	0.295056	0.039872	0.665072	0.020767	0.084665	0.011182	0.001595	0.205742	0.494418	0.759171	1	0.004785	0.261563	0.275917	0.84051	0.913876	0.036683	0.301435	0.510367	0.728868	0.99681	0.454545	0.466454	0.004785	0.277512	0.524721	0.77193	0.99362	0.346093
0.38526	0.281407	0.333333	0.218121	0.285235	0.186242	0.0134	0.234506	0.499162	0.768844	0.99665	0.005025	0.256281	0.504188	0.710218	1	0.001675	0.261307	0.489112	0.737018	0.98325	0.383585	0.172529	0.443886	0.055369	0.088926	0.008389	0.001675	0.313233	0.566164	0.80067	1	0.072027	0.284757	0.375209	0.60804	0.944724	0.0067	0.179229	0.469012	0.735343	0.973199	0.58124	0.362416	0.0067	0.324958	0.544389	0.775544	0.98325	0.278057
0.334975	0.3867	0.278325	0.224691	0.175309	0.224691	0.049261	0.224138	0.455665	0.761084	0.997537	0.004926	0.29064	0.534483	0.758621	0.972906	0.002463	0.221675	0.470443	0.699507	1	0.509852	0.270936	0.219212	0.101235	0.037037	0.007407	0.002463	0.332512	0.554187	0.751232	1	0.238916	0.450739	0.704433	0.847291	0.987685	0.012315	0.08867	0.142857	0.197044	0.79064	0.571429	0.365432	0.012315	0.285714	0.551724	0.773399	0.982759	0.403941
0.370861	0.295364	0.333775	0.217507	0.234748	0.198939	0.003974	0.222517	0.478146	0.740397	1	0.006623	0.250331	0.512583	0.762914	0.994702	0.001325	0.270199	0.499338	0.750993	0.998675	0.245033	0.005298	0.749669	0.003979	0.075597	0.001326	0.001325	0.365563	0.560265	0.790728	1	0.829139	0.829139	0.830464	0.981457	0.982781	0.009272	0.206623	0.459603	0.735099	0.997351	0.512583	0.472149	0.006623	0.271523	0.503311	0.752318	0.997351	0.331126
0.304615	0.335385	0.36	0.203704	0.20679	0.216049	0.009231	0.329231	0.575385	0.824615	1	0.018462	0.252308	0.473846	0.704615	0.987692	0.003077	0.196923	0.44	0.707692	0.996923	0.486154	0.187692	0.326154	0.08642	0.074074	0	0.003077	0.28	0.523077	0.689231	1	0.144615	0.286154	0.476923	0.713846	0.941538	0.024615	0.116923	0.452308	0.815385	0.993846	0.633846	0.351852	0.006154	0.206154	0.458462	0.710769	0.987692	0.332308
0.295455	0.313636	0.390909	0.16692	0.218513	0.277693	0.00303	0.175758	0.454545	0.736364	0.99697	0.006061	0.266667	0.481818	0.74697	1	0.001515	0.298485	0.518182	0.756061	0.987879	0.3	0.04697	0.65303	0.018209	0.060698	0.003035	0.001515	0.145455	0.365152	0.713636	1	0.004545	0.028788	0.106061	0.406061	0.442424	0.043939	0.339394	0.580303	0.784848	0.978788	0.659091	0.276176	0.004545	0.289394	0.510606	0.759091	0.980303	0.298485
0.367089	0.350211	0.2827	0.232558	0.207188	0.175476	0.006329	0.28692	0.609705	0.835443	0.99789	0.010549	0.234177	0.455696	0.721519	1	0.00211	0.21097	0.43038	0.588608	0.993671	0.445148	0.090717	0.464135	0.054968	0.084567	0.008457	0.00211	0.160338	0.42827	0.708861	1	0.088608	0.128692	0.2173	0.331224	0.991561	0.080169	0.348101	0.624473	0.808017	0.987342	0.483122	0.38055	0.004219	0.301688	0.476793	0.704641	0.995781	0.379747
0.269036	0.365482	0.365482	0.209184	0.178571	0.306122	0.045685	0.243655	0.558376	0.766497	0.994924	0.015228	0.28934	0.48731	0.695431	1	0.005076	0.19797	0.426396	0.741117	0.989848	0.522843	0.253807	0.22335	0.091837	0.030612	0	0.005076	0.233503	0.456853	0.664975	1	0.015228	0.116751	0.279188	0.416244	0.873096	0.598985	0.715736	0.771574	0.908629	0.964467	0.588832	0.316327	0.010152	0.218274	0.411168	0.736041	0.989848	0.375635
0.362924	0.29765	0.339426	0.167539	0.267016	0.17801	0.018277	0.18799	0.4047	0.624021	0.997389	0.010444	0.318538	0.579634	0.853786	0.992167	0.002611	0.248042	0.545692	0.770235	1	0.250653	0.088773	0.660574	0.031414	0.062827	0.015707	0.002611	0.208877	0.472585	0.845953	1	0.007833	0.219321	0.287206	0.882507	0.908616	0.010444	0.326371	0.545692	0.723238	0.986945	0.48564	0.445026	0.007833	0.287206	0.563969	0.788512	0.986945	0.331593
0.336683	0.335008	0.328308	0.184564	0.228188	0.208054	0.015075	0.247906	0.500838	0.723618	0.99665	0.00335	0.284757	0.517588	0.770519	0.998325	0.001675	0.217755	0.470687	0.740369	1	0.413735	0.105528	0.480737	0.043624	0.087248	0.003356	0.001675	0.244556	0.472362	0.805695	1	0.056951	0.135678	0.256281	0.480737	0.968174	0.0067	0.291457	0.546064	0.693467	0.9933	0.514238	0.352349	0.0067	0.237856	0.417085	0.738693	0.991625	0.340034
0.303922	0.333333	0.362745	0.217822	0.188119	0.257426	0.019608	0.372549	0.598039	0.754902	1	0.039216	0.294118	0.539216	0.764706	0.990196	0.009804	0.186275	0.284314	0.607843	0.980392	0.303922	0.098039	0.598039	0.059406	0.059406	0	0.009804	0.068627	0.686275	0.843137	1	0.784314	0.794118	0.901961	0.95098	0.980392	0.078431	0.215686	0.362745	0.519608	0.745098	0.382353	0.376238	0.04902	0.166667	0.45098	0.598039	0.980392	0.323529
0.30329	0.343348	0.353362	0.212034	0.217765	0.234957	0.002861	0.257511	0.527897	0.7897	0.998569	0.005722	0.238913	0.484979	0.733906	0.995708	0.001431	0.251788	0.48927	0.728183	1	0.433476	0.150215	0.416309	0.061605	0.081662	0.004298	0.001431	0.221745	0.459227	0.725322	1	0.088698	0.320458	0.519313	0.779685	0.944206	0.002861	0.236052	0.507868	0.756795	0.995708	0.632332	0.34384	0.004292	0.248927	0.48784	0.705293	0.997139	0.377682
0.35545	0.398104	0.246445	0.247619	0.157143	0.2	0.023697	0.336493	0.611374	0.78673	1	0.009479	0.175355	0.407583	0.677725	0.995261	0.004739	0.21327	0.450237	0.734597	0.985782	0.620853	0.037915	0.341232	0.019048	0.12381	0	0.004739	0.279621	0.545024	0.819905	1	0.123223	0.127962	0.137441	0.459716	0.469194	0.023697	0.227488	0.421801	0.701422	0.938389	0.388626	0.352381	0.042654	0.137441	0.350711	0.720379	0.962085	0.436019
0.219697	0.386364	0.393939	0.19084	0.122137	0.251908	0.015152	0.174242	0.378788	0.651515	1	0.022727	0.25	0.393939	0.704545	0.984848	0.007576	0.356061	0.560606	0.848485	0.969697	0.439394	0.189394	0.371212	0.045802	0.061069	0.030534	0.007576	0.136364	0.287879	0.5	1	0.037879	0.219697	0.424242	0.560606	0.613636	0.189394	0.704545	0.795455	0.886364	0.984848	0.484848	0.229008	0.037879	0.333333	0.515152	0.69697	0.969697	0.378788
0.361233	0.334802	0.303965	0.283186	0.190265	0.230088	0.013216	0.281938	0.54185	0.748899	1	0.008811	0.189427	0.436123	0.731278	0.995595	0.004405	0.259912	0.497797	0.718062	0.991189	0.339207	0.176211	0.484581	0.070796	0.088496	0	0.004405	0.193833	0.400881	0.660793	1	0.017621	0.167401	0.374449	0.629956	0.77533	0.07489	0.317181	0.568282	0.859031	0.991189	0.572687	0.40708	0.017621	0.193833	0.449339	0.647577	0.991189	0.356828
0.288809	0.462094	0.249097	0.268116	0.188406	0.210145	0.01444	0.212996	0.447653	0.610108	0.99639	0.00722	0.292419	0.624549	0.794224	0.981949	0.00361	0.216606	0.429603	0.67509	1	0.693141	0.209386	0.097473	0.086957	0.021739	0.007246	0.00361	0.288809	0.631769	0.815884	1	0.032491	0.173285	0.299639	0.382671	0.99278	0.025271	0.249097	0.451264	0.476534	0.501805	0.451264	0.304348	0.025271	0.223827	0.386282	0.67148	0.98917	0.501805
0.3	0.39	0.31	0.272727	0.191919	0.272727	0.13	0.32	0.61	0.74	0.99	0.02	0.14	0.39	0.65	0.97	0.01	0.25	0.51	0.81	1	0.46	0.12	0.42	0.030303	0.070707	0.010101	0.01	0.36	0.48	0.75	1	0.05	0.07	0.1	0.17	0.2	0.21	0.31	0.6	0.86	0.97	0.38	0.40404	0.07	0.29	0.58	0.88	0.98	0.39
0.372727	0.272727	0.354545	0.165138	0.311927	0.155963	0.018182	0.163636	0.336364	0.7	0.990909	0.136364	0.363636	0.536364	0.745455	1	0.009091	0.209091	0.518182	0.736364	0.972727	0.372727	0.272727	0.354545	0.091743	0.073394	0	0.009091	0.245455	0.5	0.863636	1	0.036364	0.090909	0.190909	0.454545	0.927273	0.254545	0.327273	0.581818	0.672727	0.972727	0.518182	0.40367	0.036364	0.254545	0.518182	0.7	0.936364	0.336364
0.269565	0.35942	0.371014	0.18314	0.18314	0.267442	0.008696	0.194203	0.547826	0.713043	0.976812	0.005797	0.249275	0.501449	0.771014	1	0.002899	0.281159	0.481159	0.718841	0.997101	0.257971	0.06087	0.681159	0.02907	0.081395	0	0.002899	0.197101	0.397101	0.802899	1	0.327536	0.75942	0.782609	0.82029	0.892754	0.04058	0.243478	0.472464	0.66087	0.994203	0.626087	0.319767	0.034783	0.269565	0.46087	0.721739	0.991304	0.376812
0.130081	0.455285	0.414634	0.106557	0.106557	0.434426	0.138211	0.203252	0.504065	0.691057	0.99187	0.01626	0.292683	0.577236	0.747967	0.98374	0.00813	0.162602	0.382114	0.756098	1	0.195122	0.04878	0.756098	0.008197	0.07377	0.02459	0.00813	0.252033	0.487805	0.609756	1	0.02439	0.02439	0.04065	0.544715	0.560976	0.04878	0.276423	0.504065	0.780488	0.97561	0.780488	0.163934	0.02439	0.268293	0.520325	0.731707	0.97561	0.471545
0.248175	0.363747	0.388078	0.161998	0.155907	0.281364	0.004866	0.343066	0.675182	0.824818	1	0.007299	0.23236	0.476886	0.754258	0.998783	0.001217	0.222628	0.413625	0.616788	0.995134	0.412409	0.026764	0.560827	0.014616	0.070646	0.002436	0.001217	0.192214	0.694647	0.880779	1	0.00365	0.115572	0.319951	0.93674	0.954988	0.019465	0.262774	0.437956	0.613139	0.973236	0.603406	0.272838	0.00365	0.238443	0.414842	0.60219	0.995134	0.355231
0.329317	0.301205	0.369478	0.149194	0.262097	0.25	0.008032	0.257028	0.485944	0.738956	0.983936	0.02008	0.240964	0.522088	0.759036	1	0.004016	0.220884	0.473896	0.722892	0.995984	0.413655	0.228916	0.35743	0.096774	0.064516	0	0.004016	0.257028	0.502008	0.779116	1	0.012048	0.140562	0.441767	0.662651	0.963855	0.056225	0.269076	0.35743	0.718876	0.927711	0.614458	0.362903	0.012048	0.240964	0.437751	0.710843	0.995984	0.297189
0.310345	0.376176	0.31348	0.242138	0.220126	0.248428	0.00627	0.203762	0.476489	0.730408	1	0.012539	0.31348	0.539185	0.824451	0.99373	0.003135	0.225705	0.454545	0.711599	0.990596	0.557994	0.257053	0.184953	0.100629	0.031447	0	0.003135	0.213166	0.410658	0.768025	1	0.109718	0.413793	0.645768	0.808777	0.962382	0.053292	0.094044	0.504702	0.60815	0.76489	0.586207	0.371069	0.037618	0.297806	0.520376	0.799373	0.990596	0.401254
0.313316	0.381201	0.305483	0.225131	0.201571	0.230366	0.007833	0.224543	0.503916	0.741514	1	0.005222	0.24282	0.493473	0.754569	0.994778	0.002611	0.26893	0.498695	0.738903	0.986945	0.464752	0.190601	0.344648	0.068063	0.057592	0	0.002611	0.227154	0.45953	0.754569	1	0.10705	0.313316	0.456919	0.639687	0.89295	0.010444	0.261097	0.558747	0.796345	0.994778	0.663185	0.382199	0.010444	0.266319	0.503916	0.733681	0.994778	0.339426
0.281407	0.39196	0.326633	0.19697	0.227273	0.232323	0.015075	0.231156	0.497487	0.683417	0.984925	0.025126	0.236181	0.482412	0.778894	1	0.005025	0.256281	0.492462	0.718593	0.98995	0.512563	0.236181	0.251256	0.090909	0.050505	0	0.005025	0.241206	0.487437	0.768844	1	0.125628	0.276382	0.407035	0.688442	0.909548	0.030151	0.085427	0.572864	0.798995	0.864322	0.497487	0.414141	0.01005	0.20603	0.457286	0.728643	0.969849	0.442211
0.292276	0.377871	0.329854	0.182008	0.211297	0.25523	0.008351	0.265136	0.494781	0.730689	0.991649	0.004175	0.292276	0.54071	0.77453	1	0.002088	0.181628	0.436326	0.743215	0.997912	0.60334	0.202505	0.194154	0.085774	0.039749	0.006276	0.002088	0.283925	0.574113	0.753653	1	0.039666	0.352818	0.56785	0.849687	0.985386	0.004175	0.075157	0.254697	0.453027	0.649269	0.586639	0.405858	0.006263	0.217119	0.478079	0.720251	0.995825	0.363257
0.271739	0.418478	0.309783	0.226158	0.177112	0.299728	0.008152	0.271739	0.472826	0.69837	0.994565	0.005435	0.26087	0.532609	0.763587	1	0.002717	0.206522	0.459239	0.709239	0.98913	0.429348	0.133152	0.4375	0.054496	0.087193	0	0.002717	0.190217	0.472826	0.720109	1	0.141304	0.290761	0.48913	0.684783	0.883152	0.008152	0.307065	0.527174	0.774457	0.972826	0.605978	0.39782	0.005435	0.247283	0.497283	0.766304	0.98913	0.429348
0.288732	0.362676	0.348592	0.190813	0.226148	0.257951	0.007042	0.264085	0.528169	0.704225	0.957746	0.014085	0.257042	0.538732	0.788732	1	0.003521	0.193662	0.419014	0.676056	0.996479	0.464789	0.306338	0.228873	0.123675	0.031802	0.017668	0.003521	0.271127	0.489437	0.728873	1	0.035211	0.46831	0.697183	0.859155	0.992958	0.021127	0.080986	0.25	0.588028	0.647887	0.605634	0.360424	0.010563	0.267606	0.485915	0.746479	0.985915	0.288732
0.424528	0.273585	0.301887	0.180952	0.314286	0.2	0.018868	0.292453	0.481132	0.726415	0.990566	0.028302	0.169811	0.59434	0.754717	0.943396	0.009434	0.198113	0.471698	0.716981	1	0.292453	0	0.707547	0	0.133333	0	0.009434	0.377358	0.707547	0.783019	1	0	0	0	0	0	0.037736	0.226415	0.433962	0.650943	0.971698	0.462264	0.533333	0.028302	0.216981	0.471698	0.735849	0.981132	0.292453
0.2	0.416949	0.383051	0.163265	0.119048	0.312925	0.00678	0.284746	0.589831	0.905085	1	0.016949	0.250847	0.532203	0.789831	0.99661	0.00339	0.213559	0.40339	0.627119	0.918644	0.376271	0.030508	0.59322	0.006803	0.088435	0	0.00339	0.288136	0.698305	0.905085	1	0.491525	0.494915	0.501695	0.508475	0.518644	0.010169	0.19661	0.389831	0.644068	0.844068	0.691525	0.244898	0.010169	0.233898	0.437288	0.671186	0.932203	0.349153
0.293233	0.403509	0.303258	0.263819	0.208543	0.246231	0.012531	0.308271	0.578947	0.786967	0.992481	0.005013	0.215539	0.423559	0.674185	1	0.002506	0.270677	0.531328	0.769424	0.997494	0.47619	0.117794	0.406015	0.045226	0.070352	0	0.002506	0.182957	0.478697	0.759398	1	0.130326	0.203008	0.448622	0.75188	0.902256	0.045113	0.330827	0.541353	0.724311	0.987469	0.62406	0.321608	0.027569	0.290727	0.503759	0.684211	0.984962	0.378446
0.357827	0.341853	0.300319	0.189103	0.176282	0.246795	0.009585	0.329073	0.597444	0.773163	0.984026	0.00639	0.230032	0.444089	0.750799	0.996805	0.003195	0.201278	0.389776	0.667732	1	0.530351	0.140575	0.329073	0.044872	0.064103	0.012821	0.003195	0.246006	0.501597	0.71885	1	0.067093	0.338658	0.571885	0.939297	0.990415	0.022364	0.223642	0.386581	0.722045	0.913738	0.412141	0.301282	0.015974	0.220447	0.386581	0.664537	0.98722	0.392971
0.132584	0.444944	0.422472	0.121622	0.083333	0.391892	0.008989	0.27191	0.498876	0.775281	1	0.004494	0.21573	0.519101	0.725843	0.991011	0.002247	0.258427	0.458427	0.750562	0.993258	0.238202	0.024719	0.737079	0.006757	0.074324	0.002252	0.002247	0.265169	0.496629	0.775281	1	0.031461	0.033708	0.040449	0.047191	0.067416	0.011236	0.280899	0.516854	0.748315	0.968539	0.802247	0.162162	0.013483	0.233708	0.465169	0.725843	0.993258	0.438202
0.334917	0.31829	0.346793	0.192857	0.238095	0.22619	0.004751	0.266033	0.501188	0.783848	1	0.011876	0.254157	0.555819	0.731591	0.997625	0.002375	0.232779	0.456057	0.724466	0.990499	0.446556	0.166271	0.387173	0.071429	0.090476	0.004762	0.002375	0.216152	0.484561	0.752969	1	0.011876	0.211401	0.565321	0.814727	0.926366	0.085511	0.320665	0.491686	0.695962	0.973872	0.581948	0.390476	0.009501	0.232779	0.475059	0.72209	0.990499	0.330166
0.317149	0.375	0.307851	0.249224	0.203723	0.235781	0.003099	0.261364	0.519628	0.770661	0.997934	0.002066	0.232438	0.481405	0.737603	1	0.001033	0.258264	0.511364	0.73657	0.996901	0.424587	0.108471	0.466942	0.061013	0.069286	0.005171	0.001033	0.227273	0.409091	0.653926	1	0.043388	0.229339	0.372934	0.566116	0.922521	0.014463	0.352273	0.620868	0.789256	0.993802	0.581612	0.353671	0.008264	0.241736	0.472107	0.710744	0.994835	0.402893
0.414013	0.248408	0.33758	0.191693	0.284345	0.159744	0.009554	0.257962	0.522293	0.72293	1	0.022293	0.210191	0.449045	0.792994	0.990446	0.003185	0.251592	0.5	0.738854	0.996815	0.410828	0.073248	0.515924	0.038339	0.083067	0.025559	0.003185	0.181529	0.302548	0.89172	1	0.012739	0.076433	0.242038	0.850318	0.88535	0.035032	0.401274	0.557325	0.72293	0.93949	0.429936	0.357827	0.012739	0.264331	0.452229	0.713376	0.974522	0.292994
0.320988	0.376543	0.302469	0.19195	0.213622	0.25387	0.012346	0.324074	0.592593	0.839506	1	0.006173	0.219136	0.429012	0.614198	0.993827	0.003086	0.185185	0.533951	0.740741	0.996914	0.493827	0.126543	0.37963	0.065015	0.058824	0.003096	0.003086	0.188272	0.466049	0.700617	1	0.015432	0.342593	0.441358	0.611111	0.79321	0.095679	0.287037	0.635802	0.87037	0.978395	0.626543	0.260062	0.037037	0.225309	0.429012	0.666667	0.981481	0.37037
0.292237	0.3379	0.369863	0.183486	0.197248	0.266055	0.018265	0.328767	0.584475	0.785388	1	0.027397	0.205479	0.392694	0.639269	0.995434	0.004566	0.187215	0.506849	0.767123	0.981735	0.625571	0.196347	0.178082	0.100917	0.036697	0	0.004566	0.260274	0.461187	0.785388	1	0.018265	0.305936	0.639269	0.826484	0.972603	0.077626	0.114155	0.474886	0.56621	0.611872	0.479452	0.330275	0.013699	0.182648	0.520548	0.712329	0.981735	0.360731
0.313413	0.353254	0.333333	0.227394	0.202128	0.243351	0.003984	0.264276	0.601594	0.804781	1	0.002656	0.23506	0.472776	0.747676	0.994688	0.001328	0.239044	0.458167	0.691899	0.998672	0.427623	0.098274	0.474104	0.043883	0.0625	0.003989	0.001328	0.132802	0.459495	0.767596	1	0.00664	0.227092	0.713147	0.752988	0.847278	0.070385	0.321381	0.541833	0.683931	0.961487	0.594954	0.268617	0.005312	0.26162	0.472776	0.711819	0.988048	0.37583
0.203936	0.466905	0.329159	0.200717	0.109319	0.329749	0.007156	0.143113	0.450805	0.68873	1	0.003578	0.216458	0.479428	0.763864	0.998211	0.001789	0.34347	0.525939	0.756708	0.994633	0.386404	0.050089	0.563506	0.021505	0.064516	0.010753	0.001789	0.096601	0.42576	0.620751	1	0.144902	0.300537	0.55814	0.896243	0.994633	0.153846	0.320215	0.536673	0.769231	0.944544	0.690519	0.25448	0.014311	0.304114	0.499106	0.740608	0.991055	0.465116
0.346774	0.346774	0.306452	0.203252	0.252033	0.195122	0.032258	0.169355	0.387097	0.556452	0.943548	0.016129	0.233871	0.572581	0.798387	1	0.008065	0.25	0.596774	0.774194	0.983871	0.435484	0.241935	0.322581	0.073171	0.056911	0.00813	0.008065	0.370968	0.508065	0.733871	1	0.403226	0.629032	0.693548	0.798387	0.991935	0.032258	0.104839	0.25	0.330645	0.943548	0.459677	0.292683	0.056452	0.290323	0.637097	0.806452	0.975806	0.41129
0.23511	0.376176	0.388715	0.179245	0.154088	0.339623	0.040752	0.335423	0.473354	0.749216	0.978056	0.00627	0.269592	0.53605	0.76489	1	0.003135	0.191223	0.454545	0.708464	0.996865	0.23511	0.015674	0.749216	0.012579	0.081761	0	0.003135	0.244514	0.592476	0.833856	1	0.818182	0.818182	0.84953	0.852665	0.858934	0.00627	0.238245	0.460815	0.677116	0.990596	0.755486	0.213836	0.00627	0.23511	0.492163	0.69906	0.987461	0.401254
0.358255	0.271028	0.370717	0.203125	0.278125	0.2	0.012461	0.239875	0.489097	0.785047	0.996885	0.05296	0.211838	0.520249	0.713396	1	0.003115	0.252336	0.47352	0.732087	0.993769	0.323988	0.105919	0.570093	0.0375	0.1	0.00625	0.003115	0.193146	0.445483	0.719626	1	0.071651	0.158879	0.451713	0.542056	0.925234	0.015576	0.271028	0.510903	0.772586	0.993769	0.535826	0.44375	0.015576	0.221184	0.507788	0.722741	0.993769	0.258567
0.28223	0.38676	0.33101	0.227273	0.192308	0.262238	0.010453	0.212544	0.470383	0.714286	0.996516	0.017422	0.261324	0.45993	0.738676	0.97561	0.003484	0.247387	0.526132	0.759582	1	0.376307	0.275261	0.348432	0.108392	0.094406	0.01049	0.003484	0.205575	0.383275	0.773519	1	0.006969	0.219512	0.456446	0.634146	0.979094	0.04878	0.414634	0.567944	0.735192	0.944251	0.578397	0.440559	0.006969	0.247387	0.505226	0.738676	0.993031	0.456446
0.248322	0.503356	0.248322	0.244395	0.112108	0.213004	0.004474	0.315436	0.548098	0.767338	1	0.008949	0.212528	0.438479	0.713647	0.995526	0.002237	0.263982	0.512304	0.814318	0.997763	0.595078	0.219239	0.185682	0.071749	0.053812	0.004484	0.002237	0.243848	0.525727	0.702461	1	0.261745	0.391499	0.597315	0.930649	0.997763	0.006711	0.111857	0.210291	0.630872	0.899329	0.447427	0.313901	0.006711	0.272931	0.501119	0.818792	0.997763	0.534676
0.288684	0.422633	0.288684	0.236111	0.152778	0.238426	0.023095	0.230947	0.484988	0.734411	0.997691	0.004619	0.263279	0.494226	0.732102	1	0.002309	0.235566	0.505774	0.785219	0.995381	0.43418	0.145497	0.420323	0.041667	0.092593	0	0.002309	0.279446	0.551963	0.725173	1	0.288684	0.364896	0.533487	0.817552	0.900693	0.013857	0.159353	0.482679	0.748268	0.976905	0.586605	0.356481	0.009238	0.367206	0.549654	0.748268	0.995381	0.429561
0.377171	0.332506	0.290323	0.253731	0.199005	0.199005	0.014888	0.233251	0.543424	0.776675	0.997519	0.004963	0.280397	0.501241	0.791563	0.995037	0.002481	0.248139	0.48139	0.669975	1	0.53598	0.223325	0.240695	0.074627	0.064677	0	0.002481	0.312655	0.60794	0.83871	1	0.062035	0.48139	0.598015	0.694789	0.997519	0.004963	0.129032	0.270471	0.382134	0.808933	0.538462	0.348259	0.009926	0.248139	0.439206	0.667494	0.992556	0.349876
0.227692	0.424615	0.347692	0.178737	0.138675	0.255778	0.006154	0.293846	0.544615	0.849231	0.995385	0.003077	0.195385	0.415385	0.738462	0.998462	0.001538	0.258462	0.573846	0.716923	1	0.472308	0.064615	0.463077	0.030817	0.052388	0.003082	0.001538	0.135385	0.341538	0.816923	1	0.013846	0.221538	0.250769	0.801538	0.975385	0.070769	0.426154	0.569231	0.709231	0.995385	0.641538	0.197227	0.013846	0.249231	0.501538	0.703077	0.993846	0.453846
0.225564	0.413534	0.360902	0.151515	0.121212	0.393939	0.105263	0.285714	0.533835	0.75188	0.992481	0.015038	0.210526	0.466165	0.699248	0.962406	0.007519	0.203008	0.496241	0.804511	1	0.488722	0.120301	0.390977	0.075758	0.045455	0	0.007519	0.263158	0.383459	0.578947	1	0.43609	0.481203	0.511278	0.669173	0.699248	0.022556	0.112782	0.781955	0.879699	0.977444	0.443609	0.272727	0.022556	0.120301	0.481203	0.684211	0.932331	0.390977
0.330357	0.379464	0.290179	0.242152	0.210762	0.2287	0.017857	0.267857	0.526786	0.794643	1	0.004464	0.205357	0.477679	0.691964	0.96875	0.013393	0.28125	0.5	0.763393	0.991071	0.544643	0.28125	0.174107	0.116592	0.026906	0	0.004464	0.303571	0.473214	0.705357	1	0.196429	0.580357	0.745536	0.866071	0.995536	0.035714	0.071429	0.116071	0.160714	0.446429	0.450893	0.44843	0.026786	0.227679	0.571429	0.794643	0.986607	0.446429
0.299632	0.329044	0.371324	0.160221	0.233886	0.237569	0.007353	0.299632	0.503676	0.709559	0.996324	0.009191	0.209559	0.490809	0.768382	0.998162	0.001838	0.237132	0.483456	0.737132	1	0.387868	0.075368	0.536765	0.046041	0.07919	0.001842	0.001838	0.261029	0.586397	0.845588	1	0.080882	0.145221	0.766544	0.838235	0.977941	0.005515	0.259191	0.452206	0.639706	0.992647	0.621324	0.327808	0.005515	0.231618	0.487132	0.748162	0.994485	0.341912
0.220472	0.472441	0.307087	0.238095	0.111111	0.277778	0.031496	0.220472	0.527559	0.669291	0.944882	0.015748	0.251969	0.472441	0.795276	1	0.007874	0.23622	0.496063	0.748031	0.984252	0.330709	0.330709	0.338583	0.111111	0.063492	0	0.007874	0.204724	0.409449	0.669291	1	0.149606	0.259843	0.574803	0.692913	0.80315	0.023622	0.094488	0.433071	0.889764	0.976378	0.582677	0.349206	0.023622	0.244094	0.503937	0.716535	0.96063	0.472441
0.303523	0.365854	0.330623	0.233696	0.244565	0.252717	0.01355	0.230352	0.474255	0.739837	0.9729	0.00542	0.246612	0.460705	0.720867	1	0.00271	0.249322	0.552846	0.794038	0.99458	0.409214	0.157182	0.433604	0.067935	0.07337	0.002717	0.00271	0.382114	0.574526	0.785908	1	0.276423	0.544715	0.615176	0.747967	0.872629	0.00813	0.132791	0.252033	0.653117	0.95393	0.579946	0.413043	0.00813	0.327913	0.560976	0.753388	0.99458	0.406504
0.174089	0.380567	0.445344	0.178862	0.105691	0.357724	0.012146	0.315789	0.437247	0.688259	0.967611	0.008097	0.251012	0.534413	0.744939	0.991903	0.004049	0.218623	0.48583	0.773279	1	0.238866	0	0.761134	0	0.081301	0	0.004049	0.105263	0.425101	0.672065	1	0	0	0	0	0	0.008097	0.255061	0.51417	0.781377	0.995951	0.797571	0.146341	0.008097	0.267206	0.502024	0.765182	0.991903	0.396761
0.275862	0.421456	0.302682	0.226923	0.180769	0.215385	0.007663	0.218391	0.555556	0.785441	0.992337	0.015326	0.233716	0.455939	0.67433	1	0.003831	0.272031	0.509579	0.758621	0.996169	0.356322	0.157088	0.48659	0.080769	0.096154	0.003846	0.003831	0.245211	0.444444	0.724138	1	0.195402	0.329502	0.517241	0.708812	0.915709	0.011494	0.157088	0.478927	0.758621	0.988506	0.559387	0.407692	0.019157	0.321839	0.505747	0.735632	0.984674	0.440613
0.281879	0.395973	0.322148	0.202703	0.243243	0.236486	0.053691	0.463087	0.630872	0.812081	0.993289	0.026846	0.174497	0.355705	0.624161	1	0.006711	0.214765	0.516779	0.771812	0.973154	0.281879	0.053691	0.66443	0.013514	0.135135	0.013514	0.006711	0.241611	0.563758	0.657718	1	0.33557	0.342282	0.355705	0.369128	0.946309	0.026846	0.201342	0.503356	0.744966	0.932886	0.577181	0.513514	0.020134	0.241611	0.469799	0.771812	0.973154	0.395973
0.285714	0.437788	0.276498	0.253846	0.164615	0.226154	0.004608	0.281106	0.502304	0.72043	0.984639	0.003072	0.211982	0.490015	0.741935	0.998464	0.001536	0.258065	0.509985	0.768049	1	0.635945	0.076805	0.28725	0.04	0.064615	0.003077	0.001536	0.250384	0.589862	0.780338	1	0.006144	0.549923	0.777266	0.803379	0.966206	0.032258	0.231951	0.321045	0.457757	0.969278	0.450077	0.412308	0.006144	0.247312	0.459293	0.75576	0.993856	0.456221
0.228188	0.371365	0.400447	0.174888	0.14574	0.32287	0.004474	0.165548	0.501119	0.642058	1	0.008949	0.250559	0.480984	0.749441	0.995526	0.002237	0.266219	0.514541	0.774049	0.966443	0.324385	0.013423	0.662192	0.011211	0.069507	0.002242	0.002237	0.10962	0.494407	0.709172	1	0.111857	0.111857	0.337808	0.409396	0.41387	0.008949	0.290828	0.510067	0.762864	0.966443	0.659955	0.197309	0.013423	0.286353	0.514541	0.767338	0.96868	0.391499
0.30033	0.359736	0.339934	0.215232	0.211921	0.254967	0.013201	0.181518	0.554455	0.775578	1	0.006601	0.231023	0.438944	0.676568	0.9967	0.0033	0.273927	0.508251	0.772277	0.976898	0.518152	0.30033	0.181518	0.119205	0.05298	0	0.0033	0.313531	0.481848	0.712871	1	0.009901	0.343234	0.613861	0.881188	0.976898	0.033003	0.072607	0.234323	0.541254	0.825083	0.547855	0.390728	0.009901	0.264026	0.49835	0.739274	0.976898	0.353135
0.333333	0.382979	0.283688	0.314286	0.157143	0.185714	0.014184	0.212766	0.567376	0.758865	0.978723	0.021277	0.219858	0.446809	0.751773	0.985816	0.007092	0.326241	0.468085	0.687943	1	0.468085	0.035461	0.496454	0.014286	0.071429	0	0.007092	0.212766	0.730496	0.843972	1	0.87234	0.87234	0.879433	0.886525	0.900709	0.042553	0.248227	0.446809	0.567376	0.723404	0.468085	0.371429	0.021277	0.276596	0.446809	0.666667	0.985816	0.453901
0.382576	0.238636	0.378788	0.129278	0.288973	0.193916	0.007576	0.200758	0.488636	0.772727	0.996212	0.034091	0.333333	0.492424	0.712121	1	0.003788	0.246212	0.503788	0.746212	0.988636	0.375	0.227273	0.397727	0.091255	0.053232	0.007605	0.003788	0.200758	0.401515	0.670455	1	0.018939	0.32197	0.594697	0.852273	0.996212	0.102273	0.246212	0.541667	0.780303	0.916667	0.606061	0.387833	0.011364	0.295455	0.507576	0.738636	0.988636	0.284091
0.312217	0.39819	0.289593	0.236364	0.218182	0.259091	0.00905	0.248869	0.484163	0.728507	0.99095	0.0181	0.271493	0.515837	0.742081	1	0.004525	0.199095	0.475113	0.760181	0.9819	0.502262	0.497738	0	0.218182	0	0	0.004525	0.244344	0.497738	0.755656	1	0.0181	0.235294	0.484163	0.737557	0.986425	0	0	0	0	0	0.552036	0.409091	0.013575	0.266968	0.475113	0.733032	0.986425	0.420814
0.282967	0.387363	0.32967	0.225895	0.195592	0.264463	0.005495	0.222527	0.502747	0.722527	1	0.008242	0.260989	0.524725	0.782967	0.991758	0.002747	0.25	0.475275	0.717033	0.994505	0.527473	0.351648	0.120879	0.134986	0.035813	0.008264	0.002747	0.195055	0.406593	0.695055	1	0.068681	0.321429	0.510989	0.739011	0.986264	0.282967	0.524725	0.711538	0.807692	0.923077	0.538462	0.380165	0.019231	0.291209	0.519231	0.744505	0.994505	0.409341
0.266893	0.41479	0.318317	0.218112	0.158588	0.235119	0.001275	0.249894	0.518487	0.759456	0.99915	0.00085	0.255419	0.487463	0.81003	0.999575	0.000425	0.21037	0.486613	0.703782	1	0.521887	0.043349	0.434764	0.025085	0.059099	0.002126	0.000425	0.266043	0.497663	0.846154	1	0.033149	0.243944	0.619635	0.841479	0.98895	0.002975	0.19677	0.495538	0.672333	0.985975	0.563111	0.306122	0.0034	0.221419	0.456864	0.709732	0.9915	0.433914
0.323308	0.338346	0.338346	0.219697	0.272727	0.234848	0.022556	0.263158	0.556391	0.781955	1	0.015038	0.225564	0.428571	0.631579	0.969925	0.007519	0.218045	0.473684	0.75188	0.984962	0.43609	0.300752	0.263158	0.090909	0.060606	0	0.007519	0.406015	0.631579	0.774436	1	0.18797	0.255639	0.541353	0.894737	0.969925	0.022556	0.075188	0.142857	0.360902	0.766917	0.43609	0.545455	0.022556	0.218045	0.390977	0.609023	0.954887	0.345865
0.322464	0.304348	0.373188	0.194923	0.213962	0.229374	0.003623	0.23913	0.461957	0.73913	1	0.001812	0.200181	0.455616	0.700181	0.996377	0.000906	0.310688	0.584239	0.778986	0.999094	0.347826	0.069746	0.582428	0.030825	0.081596	0.001813	0.000906	0.140399	0.358696	0.688406	1	0.020833	0.106884	0.193841	0.27808	0.855072	0.004529	0.394022	0.59692	0.778986	0.998188	0.613225	0.328196	0.004529	0.285326	0.54529	0.764493	0.999094	0.319746
0.391447	0.332237	0.276316	0.245267	0.230453	0.171193	0.004112	0.263158	0.555921	0.820724	0.997533	0.001645	0.266447	0.476974	0.712171	0.999178	0.000822	0.206414	0.464638	0.666118	1	0.458882	0.111842	0.429276	0.041975	0.069959	0.002469	0.000822	0.259868	0.435033	0.683388	1	0.007401	0.095395	0.495888	0.604441	0.654605	0.015625	0.241776	0.669408	0.851974	0.989309	0.430921	0.353909	0.003289	0.245066	0.470395	0.629934	0.996711	0.349507
0.272727	0.429091	0.298182	0.229927	0.178832	0.248175	0.014545	0.232727	0.487273	0.738182	0.996364	0.007273	0.269091	0.523636	0.756364	1	0.003636	0.24	0.48	0.734545	0.981818	0.44	0.174545	0.385455	0.072993	0.080292	0	0.003636	0.207273	0.527273	0.716364	1	0.018182	0.185455	0.432727	0.596364	0.934545	0.123636	0.272727	0.490909	0.76	0.989091	0.56	0.379562	0.018182	0.218182	0.490909	0.734545	0.981818	0.472727
0.195426	0.372141	0.432432	0.152083	0.158333	0.30625	0.008316	0.278586	0.590437	0.856549	1	0.016632	0.230769	0.461538	0.690229	0.991684	0.002079	0.237006	0.488565	0.760915	0.997921	0.191268	0.010395	0.798337	0.010417	0.072917	0.002083	0.002079	0.2079	0.582121	0.735967	1	0.27027	0.27027	0.272349	0.286902	0.586279	0.006237	0.24948	0.488565	0.756757	0.983368	0.773389	0.220833	0.004158	0.245322	0.492723	0.725572	0.997921	0.361746
0.305737	0.427741	0.266521	0.25218	0.176599	0.228924	0.001452	0.272331	0.514887	0.758896	0.997821	0.003631	0.24183	0.485113	0.745824	0.999274	0.000726	0.217865	0.496732	0.743646	1	0.530864	0.384168	0.084967	0.15625	0.015262	0.000727	0.000726	0.256354	0.490922	0.726943	1	0.002905	0.297749	0.557008	0.813362	0.999274	0.007988	0.029049	0.15541	0.487291	0.805374	0.631082	0.366279	0.002905	0.248366	0.517066	0.761801	0.998548	0.447349
0.19869	0.358079	0.443231	0.137856	0.129103	0.345733	0.008734	0.244541	0.548035	0.759825	0.995633	0.00655	0.266376	0.545852	0.790393	1	0.002183	0.218341	0.465066	0.687773	0.997817	0.270742	0.017467	0.71179	0.013129	0.074398	0	0.002183	0.338428	0.436681	0.768559	1	0.362445	0.364629	0.368996	0.414847	0.971616	0.004367	0.218341	0.521834	0.737991	0.995633	0.759825	0.210066	0.004367	0.235808	0.462882	0.68559	0.991266	0.318777
0.308333	0.361667	0.33	0.178631	0.240401	0.238731	0.005	0.225	0.438333	0.725	1	0.01	0.278333	0.536667	0.765	0.993333	0.001667	0.236667	0.508333	0.75	0.996667	0.473333	0.128333	0.398333	0.053422	0.083472	0.013356	0.001667	0.221667	0.38	0.745	1	0.063333	0.171667	0.386667	0.821667	0.978333	0.03	0.428333	0.546667	0.7	0.98	0.678333	0.277129	0.003333	0.281667	0.525	0.753333	0.996667	0.373333
0.326134	0.341253	0.332613	0.214286	0.220779	0.24026	0.00432	0.241901	0.542117	0.74514	1	0.015119	0.233261	0.457883	0.74946	0.99784	0.00216	0.265659	0.490281	0.742981	0.991361	0.419006	0.177106	0.403888	0.069264	0.095238	0.004329	0.00216	0.261339	0.49892	0.725702	1	0.006479	0.146868	0.341253	0.680346	0.87689	0.025918	0.291577	0.583153	0.807775	0.99568	0.673866	0.329004	0.006479	0.25054	0.464363	0.742981	0.991361	0.319654
0.235294	0.375	0.389706	0.185185	0.17037	0.251852	0.051471	0.25	0.455882	0.801471	0.955882	0.029412	0.272059	0.470588	0.742647	1	0.007353	0.205882	0.5	0.727941	0.977941	0.455882	0.169118	0.375	0.074074	0.059259	0	0.007353	0.286765	0.433824	0.816176	1	0.308824	0.477941	0.522059	0.852941	0.985294	0.051471	0.132353	0.573529	0.683824	0.801471	0.617647	0.296296	0.022059	0.242647	0.514706	0.698529	0.977941	0.301471
0.332	0.388	0.28	0.216867	0.204819	0.2249	0.012	0.24	0.504	0.74	1	0.008	0.264	0.496	0.744	0.996	0.004	0.224	0.48	0.732	0.992	0.296	0.028	0.676	0.016064	0.096386	0	0.004	0.276	0.608	0.892	1	0.612	0.612	0.62	0.628	0.98	0.016	0.208	0.452	0.708	0.956	0.524	0.481928	0.016	0.22	0.48	0.7	0.984	0.368
0.234667	0.456	0.309333	0.208556	0.144385	0.254011	0.010667	0.253333	0.501333	0.733333	0.981333	0.005333	0.224	0.512	0.72	1	0.002667	0.24	0.461333	0.802667	0.997333	0.464	0.194667	0.341333	0.09893	0.050802	0.002674	0.002667	0.242667	0.568	0.813333	1	0.077333	0.173333	0.610667	0.904	0.994667	0.021333	0.272	0.418667	0.68	0.781333	0.618667	0.395722	0.016	0.277333	0.536	0.762667	0.997333	0.474667
0.350649	0.316017	0.333333	0.229935	0.238612	0.24295	0.008658	0.246753	0.463203	0.692641	0.993506	0.004329	0.244589	0.489177	0.766234	0.997835	0.002165	0.24026	0.517316	0.764069	1	0.452381	0.266234	0.281385	0.097614	0.058568	0.010846	0.002165	0.277056	0.484848	0.699134	1	0.012987	0.21645	0.448052	0.78355	0.997835	0.032468	0.229437	0.54329	0.729437	0.945887	0.590909	0.338395	0.012987	0.255411	0.512987	0.764069	0.995671	0.309524
0.343915	0.328042	0.328042	0.177719	0.217507	0.220159	0.005291	0.224868	0.486772	0.719577	1	0.013228	0.275132	0.539683	0.806878	0.997354	0.002646	0.243386	0.465608	0.714286	0.978836	0.457672	0.174603	0.367725	0.074271	0.074271	0.005305	0.002646	0.283069	0.579365	0.76455	1	0.007937	0.378307	0.611111	0.838624	0.933862	0.047619	0.166667	0.417989	0.571429	0.984127	0.624339	0.275862	0.007937	0.277778	0.478836	0.73545	0.978836	0.375661
0.254613	0.414207	0.331181	0.190212	0.173592	0.268698	0.001845	0.256458	0.505535	0.75	0.99262	0.00369	0.267528	0.499077	0.74631	1	0.000923	0.228782	0.48893	0.749077	0.999077	0.429889	0.160517	0.409594	0.065559	0.078486	0.00277	0.000923	0.225092	0.438192	0.711255	1	0.009225	0.210332	0.389299	0.714022	0.98893	0.017528	0.276753	0.554428	0.785978	0.987085	0.664207	0.32687	0.008303	0.24262	0.48893	0.72786	0.997232	0.432657
0.242105	0.442105	0.315789	0.234043	0.191489	0.287234	0.031579	0.136842	0.431579	0.726316	0.968421	0.073684	0.263158	0.515789	0.736842	1	0.010526	0.178947	0.505263	0.694737	0.989474	0.442105	0.463158	0.094737	0.191489	0.021277	0	0.010526	0.252632	0.442105	0.652632	1	0.031579	0.157895	0.463158	0.673684	0.873684	0.905263	0.915789	0.936842	0.957895	0.989474	0.442105	0.595745	0.052632	0.273684	0.463158	0.747368	0.989474	0.431579
0.341463	0.368902	0.289634	0.232416	0.198777	0.262997	0.02439	0.283537	0.539634	0.731707	1	0.009146	0.219512	0.426829	0.740854	0.987805	0.003049	0.222561	0.512195	0.762195	0.996951	0.536585	0.073171	0.390244	0.042813	0.079511	0	0.003049	0.192073	0.393293	0.612805	1	0.131098	0.381098	0.503049	0.817073	0.984756	0.027439	0.29878	0.646341	0.77439	0.948171	0.472561	0.385321	0.021341	0.280488	0.545732	0.814024	0.987805	0.39939
0.271967	0.376569	0.351464	0.193277	0.205882	0.243697	0.008368	0.32636	0.514644	0.76569	1	0.012552	0.16318	0.405858	0.669456	0.995816	0.004184	0.267782	0.577406	0.757322	0.979079	0.485356	0.217573	0.297071	0.096639	0.046218	0.012605	0.004184	0.142259	0.414226	0.677824	1	0.087866	0.58159	0.690377	0.878661	0.983264	0.020921	0.225941	0.384937	0.715481	0.853556	0.451883	0.369748	0.016736	0.343096	0.573222	0.753138	0.987448	0.393305
0.293103	0.418103	0.288793	0.264069	0.160173	0.277056	0.051724	0.306034	0.512931	0.801724	0.99569	0.025862	0.206897	0.508621	0.724138	1	0.00431	0.198276	0.465517	0.719828	0.991379	0.474138	0.262931	0.262931	0.090909	0.064935	0.004329	0.00431	0.301724	0.62069	0.801724	1	0.008621	0.331897	0.637931	0.844828	0.978448	0.047414	0.168103	0.375	0.547414	0.616379	0.568966	0.38961	0.008621	0.198276	0.474138	0.681034	0.991379	0.461207
0.259459	0.432432	0.308108	0.219512	0.149051	0.265583	0.016216	0.262162	0.5	0.737838	0.997297	0.005405	0.227027	0.508108	0.778378	1	0.002703	0.254054	0.486486	0.710811	0.986486	0.637838	0.267568	0.094595	0.130081	0.01084	0	0.002703	0.22973	0.472973	0.713514	1	0.016216	0.210811	0.386486	0.608108	0.967568	0.845946	0.864865	0.889189	0.913514	0.991892	0.364865	0.455285	0.024324	0.245946	0.467568	0.759459	0.967568	0.456757
0.395604	0.233516	0.370879	0.184573	0.272727	0.203857	0.010989	0.28022	0.464286	0.68956	0.994505	0.008242	0.230769	0.508242	0.774725	1	0.002747	0.197802	0.513736	0.82967	0.997253	0.112637	0.013736	0.873626	0.011019	0.027548	0.00551	0.002747	0.049451	0.771978	0.96978	1	0.027473	0.027473	0.03022	0.057692	0.788462	0.032967	0.269231	0.489011	0.706044	0.964286	0.43956	0.424242	0.013736	0.225275	0.56044	0.851648	0.978022	0.233516
0.422535	0.29108	0.286385	0.231132	0.235849	0.165094	0.014085	0.258216	0.521127	0.779343	1	0.023474	0.239437	0.42723	0.732394	0.981221	0.004695	0.215962	0.492958	0.671362	0.99061	0.516432	0.187793	0.295775	0.089623	0.070755	0.004717	0.004695	0.178404	0.474178	0.840376	1	0.075117	0.384977	0.450704	0.610329	0.694836	0.018779	0.314554	0.713615	0.788732	0.920188	0.492958	0.349057	0.028169	0.262911	0.464789	0.671362	0.99061	0.314554
0.323834	0.329016	0.34715	0.202597	0.212987	0.254545	0.015544	0.297927	0.551813	0.764249	0.997409	0.005181	0.217617	0.450777	0.727979	0.989637	0.002591	0.251295	0.494819	0.738342	1	0.515544	0.391192	0.093264	0.135065	0.020779	0	0.002591	0.295337	0.510363	0.746114	1	0.142487	0.331606	0.564767	0.774611	0.997409	0.023316	0.044041	0.07513	0.098446	0.660622	0.593264	0.296104	0.010363	0.272021	0.481865	0.715026	0.976684	0.391192
0.21028	0.481308	0.308411	0.211268	0.14554	0.323944	0.03271	0.303738	0.504673	0.696262	0.981308	0.009346	0.252336	0.481308	0.771028	0.990654	0.004673	0.186916	0.476636	0.714953	1	0.359813	0.233645	0.406542	0.084507	0.084507	0.00939	0.004673	0.252336	0.420561	0.775701	1	0.014019	0.079439	0.158879	0.345794	0.985981	0.196262	0.471963	0.607477	0.757009	0.953271	0.626168	0.403756	0.018692	0.242991	0.485981	0.724299	0.995327	0.481308
0.340426	0.333333	0.326241	0.214286	0.207143	0.2	0.021277	0.304965	0.531915	0.836879	1	0.014184	0.177305	0.368794	0.70922	0.971631	0.007092	0.312057	0.539007	0.695035	0.992908	0.48227	0.156028	0.361702	0.114286	0.085714	0.014286	0.007092	0.248227	0.51773	0.836879	1	0.035461	0.219858	0.695035	0.744681	0.985816	0.092199	0.170213	0.397163	0.588652	0.808511	0.397163	0.457143	0.028369	0.219858	0.489362	0.680851	0.943262	0.368794
0.27704	0.417457	0.305503	0.21673	0.190114	0.207224	0.020873	0.256167	0.557875	0.753321	0.994307	0.003795	0.16888	0.425047	0.724858	1	0.001898	0.314991	0.538899	0.751423	0.98482	0.459203	0.182163	0.358634	0.076046	0.076046	0	0.001898	0.166983	0.493359	0.772296	1	0.248577	0.41556	0.567362	0.796964	0.941176	0.005693	0.222011	0.447818	0.669829	0.969639	0.557875	0.395437	0.00759	0.29222	0.516129	0.743833	0.98482	0.442125
0.318982	0.374168	0.306849	0.213391	0.203994	0.243931	0.001174	0.252838	0.510763	0.761644	0.999609	0.000783	0.249706	0.492368	0.745597	0.998043	0.000391	0.243444	0.502153	0.7409	1	0.445401	0.173777	0.380822	0.063038	0.077134	0.00509	0.000391	0.255186	0.493933	0.738943	1	0.014481	0.254795	0.496282	0.720548	0.976125	0.00274	0.230528	0.503327	0.785519	0.999217	0.6	0.338293	0.00274	0.254795	0.497065	0.733855	0.998826	0.372994
0.295732	0.411585	0.292683	0.235474	0.17737	0.244648	0.003049	0.243902	0.521341	0.777439	0.996951	0.012195	0.277439	0.484756	0.728659	1	0.009146	0.237805	0.496951	0.737805	0.984756	0.5	0.405488	0.094512	0.2263	0.024465	0	0.003049	0.243902	0.490854	0.795732	1	0.033537	0.304878	0.545732	0.759146	0.978659	0.20122	0.22561	0.32622	0.35061	0.594512	0.54878	0.391437	0.009146	0.271341	0.542683	0.77439	0.984756	0.445122
0.367269	0.420909	0.211823	0.27218	0.159365	0.190033	0.001642	0.244116	0.507389	0.73618	0.998905	0.001095	0.249042	0.497537	0.777778	0.999453	0.000547	0.258894	0.48659	0.716475	1	0.695676	0.100164	0.20416	0.04874	0.079409	0.003834	0.000547	0.211823	0.485495	0.762999	1	0.022989	0.361248	0.586207	0.708812	0.974275	0.01642	0.288998	0.494253	0.694034	0.998358	0.302135	0.374589	0.006021	0.282978	0.47619	0.694581	0.997263	0.458675
0.517949	0.261538	0.220513	0.314433	0.21134	0.123711	0.015385	0.25641	0.553846	0.779487	0.994872	0.010256	0.225641	0.415385	0.758974	1	0.005128	0.194872	0.430769	0.661538	0.979487	0.579487	0.117949	0.302564	0.061856	0.092784	0.010309	0.005128	0.25641	0.533333	0.8	1	0.179487	0.271795	0.517949	0.748718	0.928205	0.05641	0.148718	0.369231	0.574359	0.989744	0.312821	0.371134	0.020513	0.194872	0.358974	0.594872	0.979487	0.282051
0.420382	0.33758	0.242038	0.223642	0.204473	0.182109	0.006369	0.299363	0.522293	0.732484	0.996815	0.009554	0.136943	0.353503	0.694268	1	0.003185	0.347134	0.570064	0.799363	0.990446	0.369427	0.015924	0.61465	0.009585	0.111821	0.003195	0.003185	0.095541	0.509554	0.808917	1	0.783439	0.783439	0.786624	0.789809	0.815287	0.019108	0.286624	0.474522	0.675159	0.977707	0.452229	0.389776	0.044586	0.296178	0.547771	0.799363	0.990446	0.353503
0.365269	0.257485	0.377246	0.192771	0.289157	0.222892	0.017964	0.173653	0.389222	0.670659	0.934132	0.05988	0.347305	0.592814	0.790419	1	0.005988	0.227545	0.491018	0.766467	0.982036	0.437126	0.131737	0.431138	0.048193	0.060241	0	0.005988	0.251497	0.497006	0.60479	1	0.017964	0.041916	0.281437	0.431138	0.628743	0.125749	0.317365	0.682635	0.808383	0.958084	0.502994	0.313253	0.011976	0.281437	0.580838	0.772455	0.976048	0.221557
0.374046	0.310433	0.315522	0.214286	0.232143	0.229592	0.005089	0.21883	0.450382	0.709924	1	0.007634	0.274809	0.529262	0.753181	0.997455	0.002545	0.272265	0.541985	0.768448	0.994911	0.452926	0.234097	0.312977	0.079082	0.053571	0.002551	0.002545	0.157761	0.402036	0.661578	1	0.160305	0.343511	0.521628	0.773537	0.994911	0.063613	0.287532	0.608142	0.78626	0.982188	0.569975	0.418367	0.017812	0.292621	0.569975	0.78117	0.994911	0.302799
0.364486	0.29595	0.339564	0.24375	0.228125	0.19375	0.015576	0.227414	0.523364	0.735202	1	0.009346	0.242991	0.46729	0.738318	0.971963	0.003115	0.258567	0.489097	0.747664	0.996885	0.401869	0.286604	0.311526	0.1125	0.06875	0.0125	0.003115	0.311526	0.53271	0.738318	1	0.031153	0.258567	0.551402	0.747664	0.937695	0.012461	0.155763	0.395639	0.850467	0.990654	0.58567	0.3625	0.012461	0.267913	0.498442	0.775701	0.990654	0.302181
0.314448	0.373938	0.311615	0.213068	0.178977	0.244318	0.005666	0.243626	0.541076	0.824363	0.985836	0.011331	0.23796	0.441926	0.70255	1	0.002833	0.246459	0.535411	0.745042	0.994334	0.339943	0.172805	0.487252	0.068182	0.079545	0	0.002833	0.186969	0.453258	0.70255	1	0.005666	0.152975	0.439093	0.660057	0.847025	0.036827	0.29745	0.549575	0.824363	0.997167	0.631728	0.352273	0.008499	0.240793	0.444759	0.711048	0.991501	0.339943
0.352518	0.302158	0.345324	0.224638	0.268116	0.181159	0.014388	0.309353	0.460432	0.741007	0.992806	0.028777	0.18705	0.503597	0.748201	0.985612	0.007194	0.208633	0.489209	0.726619	1	0.489209	0.381295	0.129496	0.144928	0.028986	0.014493	0.007194	0.215827	0.42446	0.741007	1	0.035971	0.294964	0.597122	0.870504	0.992806	0.143885	0.165468	0.438849	0.467626	0.676259	0.460432	0.42029	0.021583	0.208633	0.47482	0.654676	0.985612	0.359712
0.329099	0.381125	0.289776	0.250605	0.20339	0.23063	0.00121	0.240774	0.483364	0.748336	0.999395	0.004235	0.268603	0.510587	0.741682	1	0.000605	0.23654	0.500907	0.751966	0.99879	0.499093	0.334543	0.166364	0.109564	0.034504	0.000605	0.000605	0.22928	0.46219	0.699335	1	0.040532	0.245009	0.411978	0.628554	0.99879	0.001815	0.709619	0.77072	0.837871	0.992136	0.513007	0.38862	0.00242	0.258318	0.540835	0.767695	0.998185	0.411373
0.353783	0.321063	0.325153	0.182377	0.227459	0.237705	0.00409	0.269939	0.492843	0.705521	0.997955	0.014315	0.226994	0.543967	0.777096	1	0.002045	0.231084	0.445808	0.766871	0.993865	0.390593	0.184049	0.425358	0.061475	0.053279	0	0.002045	0.298569	0.527607	0.707566	1	0.102249	0.353783	0.560327	0.689162	0.803681	0.00409	0.141104	0.466258	0.858896	0.99591	0.429448	0.368852	0.00818	0.247444	0.445808	0.764826	0.993865	0.331288
0.334842	0.303167	0.361991	0.181818	0.25	0.209091	0.036199	0.217195	0.511312	0.746606	1	0.013575	0.239819	0.475113	0.710407	0.995475	0.004525	0.248869	0.484163	0.751131	0.99095	0.41629	0.199095	0.384615	0.072727	0.090909	0	0.004525	0.190045	0.502262	0.692308	1	0.031674	0.348416	0.538462	0.918552	0.995475	0.090498	0.248869	0.39819	0.710407	0.886878	0.565611	0.372727	0.0181	0.244344	0.470588	0.719457	0.99095	0.361991
0.293333	0.466667	0.24	0.283784	0.148649	0.216216	0.026667	0.106667	0.293333	0.56	0.813333	0.146667	0.386667	0.573333	0.826667	1	0.013333	0.12	0.346667	0.786667	0.973333	0.493333	0.173333	0.333333	0.081081	0.054054	0	0.013333	0.28	0.506667	0.866667	1	0.08	0.106667	0.306667	0.346667	0.48	0.16	0.226667	0.626667	0.706667	0.8	0.64	0.378378	0.066667	0.386667	0.626667	0.8	0.973333	0.4
0.260241	0.431325	0.308434	0.219807	0.157005	0.299517	0.012048	0.320482	0.559036	0.780723	0.99759	0.004819	0.219277	0.46747	0.73253	1	0.00241	0.250602	0.491566	0.744578	0.971084	0.438554	0.214458	0.346988	0.074879	0.074879	0.002415	0.00241	0.257831	0.515663	0.766265	1	0.024096	0.308434	0.503614	0.790361	0.973494	0.053012	0.212048	0.4	0.703614	0.891566	0.631325	0.347826	0.021687	0.26988	0.503614	0.742169	0.990361	0.474699
0.321678	0.405594	0.272727	0.267606	0.169014	0.232394	0.055944	0.251748	0.601399	0.762238	0.972028	0.013986	0.216783	0.412587	0.692308	1	0.006993	0.237762	0.482517	0.699301	0.993007	0.433566	0.475524	0.090909	0.15493	0.028169	0	0.006993	0.244755	0.440559	0.657343	1	0.020979	0.174825	0.454545	0.811189	0.993007	0.671329	0.706294	0.727273	0.748252	0.776224	0.608392	0.338028	0.020979	0.223776	0.454545	0.636364	0.993007	0.384615
0.183206	0.305344	0.51145	0.115385	0.184615	0.315385	0.022901	0.21374	0.48855	0.885496	1	0.015267	0.282443	0.587786	0.832061	0.992366	0.007634	0.206107	0.427481	0.671756	0.969466	0.183206	0	0.816794	0	0.046154	0	0.007634	0.259542	0.412214	0.954198	1	0	0	0	0	0	0.022901	0.21374	0.503817	0.709924	0.916031	0.687023	0.323077	0.030534	0.21374	0.442748	0.648855	0.900763	0.267176
0.404762	0.369841	0.225397	0.262321	0.168521	0.166932	0.009524	0.238095	0.457143	0.730159	1	0.004762	0.222222	0.504762	0.773016	0.993651	0.001587	0.298413	0.511111	0.687302	0.996825	0.644444	0.080952	0.274603	0.038156	0.073132	0.00318	0.001587	0.249206	0.503175	0.806349	1	0.238095	0.395238	0.534921	0.661905	0.877778	0.003175	0.171429	0.404762	0.644444	0.996825	0.304762	0.314785	0.007937	0.365079	0.509524	0.660317	0.996825	0.414286
0.309842	0.388821	0.301337	0.229927	0.195864	0.234793	0.006075	0.208991	0.504253	0.72661	0.99514	0.00243	0.221142	0.472661	0.753341	0.998785	0.001215	0.321993	0.533414	0.760632	1	0.532199	0.140948	0.326853	0.077859	0.077859	0.007299	0.001215	0.216282	0.449575	0.72418	1	0.041312	0.315917	0.72175	0.804374	0.964763	0.032807	0.291616	0.545565	0.686513	0.99757	0.573512	0.367397	0.017011	0.320778	0.512758	0.767922	0.996355	0.408262
0.419006	0.300216	0.280778	0.272727	0.248918	0.177489	0.006479	0.276458	0.531317	0.790497	1	0.00432	0.153348	0.37797	0.699784	0.99784	0.00216	0.308855	0.535637	0.717063	0.974082	0.49676	0.155508	0.347732	0.0671	0.0671	0.019481	0.00216	0.241901	0.50108	0.74514	1	0.006479	0.133909	0.423326	0.712743	0.971922	0.025918	0.360691	0.529158	0.814255	0.969762	0.576674	0.354978	0.006479	0.278618	0.50108	0.697624	0.980562	0.298056
0.290323	0.397849	0.311828	0.189189	0.189189	0.248649	0.032258	0.274194	0.580645	0.784946	0.983871	0.010753	0.193548	0.451613	0.672043	1	0.005376	0.236559	0.5	0.758065	0.989247	0.505376	0.172043	0.322581	0.064865	0.075676	0	0.005376	0.231183	0.543011	0.741935	1	0.037634	0.215054	0.489247	0.698925	0.860215	0.129032	0.301075	0.456989	0.795699	0.973118	0.5	0.378378	0.032258	0.311828	0.489247	0.741935	0.978495	0.397849
0.317073	0.341463	0.341463	0.232653	0.212245	0.22449	0.00813	0.272358	0.53252	0.764228	1	0.036585	0.247967	0.48374	0.747967	0.99187	0.004065	0.215447	0.479675	0.723577	0.98374	0.601626	0.166667	0.231707	0.073469	0.057143	0	0.004065	0.276423	0.495935	0.756098	1	0.065041	0.256098	0.394309	0.691057	0.890244	0.012195	0.231707	0.536585	0.670732	0.98374	0.439024	0.408163	0.012195	0.211382	0.471545	0.719512	0.98374	0.47561
0.359788	0.354497	0.285714	0.234043	0.228723	0.180851	0.015873	0.269841	0.534392	0.783069	1	0.010582	0.26455	0.529101	0.751323	0.978836	0.005291	0.185185	0.402116	0.666667	0.994709	0.375661	0.169312	0.455026	0.074468	0.053191	0.010638	0.005291	0.216931	0.465608	0.740741	1	0.015873	0.243386	0.412698	0.708995	0.883598	0.121693	0.280423	0.502646	0.78836	0.962963	0.507937	0.446809	0.015873	0.238095	0.407407	0.703704	0.994709	0.349206
0.261538	0.389744	0.348718	0.190722	0.180412	0.247423	0.030769	0.220513	0.497436	0.784615	0.974359	0.010256	0.194872	0.482051	0.733333	1	0.005128	0.328205	0.502564	0.692308	0.989744	0.466667	0.071795	0.461538	0.051546	0.041237	0	0.005128	0.123077	0.287179	0.861538	1	0.112821	0.261538	0.502564	0.517949	0.94359	0.148718	0.369231	0.594872	0.707692	0.835897	0.574359	0.309278	0.020513	0.271795	0.425641	0.630769	0.969231	0.4
0.109677	0.354839	0.535484	0.090909	0.11039	0.376623	0.129032	0.451613	0.625806	0.722581	1	0.032258	0.225806	0.490323	0.787097	0.993548	0.006452	0.193548	0.425806	0.735484	0.987097	0.290323	0.006452	0.703226	0.012987	0.077922	0	0.006452	0.458065	0.612903	0.703226	1	0.619355	0.619355	0.619355	0.619355	0.619355	0.019355	0.212903	0.393548	0.806452	0.987097	0.670968	0.233766	0.019355	0.193548	0.516129	0.741935	0.987097	0.316129
0.325175	0.344988	0.329837	0.23804	0.217036	0.224037	0.003497	0.263403	0.498834	0.742424	0.998834	0.005828	0.25641	0.505828	0.764569	0.990676	0.001166	0.2331	0.48951	0.740093	1	0.398601	0.205128	0.39627	0.073512	0.07818	0.008168	0.001166	0.24359	0.51049	0.745921	1	0.024476	0.221445	0.551282	0.701632	0.948718	0.006993	0.272727	0.405594	0.757576	0.997669	0.594406	0.340723	0.004662	0.221445	0.488345	0.759907	0.996503	0.38345
0.331646	0.355696	0.312658	0.214195	0.204056	0.223067	0.003797	0.286076	0.501266	0.758228	0.997468	0.002532	0.232911	0.502532	0.735443	1	0.001266	0.207595	0.489873	0.731646	0.998734	0.497468	0.112658	0.389873	0.050697	0.086185	0.002535	0.001266	0.368354	0.598734	0.794937	1	0.062025	0.418987	0.549367	0.85443	0.970886	0.002532	0.159494	0.297468	0.593671	0.998734	0.570886	0.357414	0.005063	0.23038	0.517722	0.724051	0.987342	0.360759
0.163366	0.381188	0.455446	0.099502	0.139303	0.467662	0.009901	0.242574	0.490099	0.688119	0.99505	0.014851	0.272277	0.534653	0.757426	0.985149	0.00495	0.222772	0.470297	0.717822	1	0.19802	0.014851	0.787129	0.00995	0.099502	0	0.00495	0.326733	0.564356	0.851485	1	0.341584	0.341584	0.341584	0.346535	0.351485	0.009901	0.222772	0.5	0.732673	0.975248	0.821782	0.179104	0.019802	0.257426	0.5	0.752475	0.990099	0.366337
[truncated: 438 more rows]
[truncated: 83 more columns]
