# Supplementary material for: Prediction of RNA‐Binding Proteins by Voting Systems
Source: Hindawi journal article supplement (doi:10.1155/2011/506205), 2011-01-01
Supplement: f1 [file 506205.f1.zip › testSet6.csv]

v1	v2	v3	v4	v5	v6	v7	v8	v9	v10	v11	v12	v13	v14	v15	v16	v17	v18	v19	v20	v21	v22	v23	v24	v25	v26	v27	v28	v29	v30	v31	v32	v33	v34	v35	v36	v37	v38	v39	v40	v41	v42	v43	v44	v45	v46	v47	v48	v49	v50
0.408654	0.278846	0.3125	0.21256	0.2657	0.164251	0.014423	0.259615	0.5	0.778846	1	0.009615	0.173077	0.418269	0.639423	0.971154	0.004808	0.307692	0.514423	0.75	0.990385	0.475962	0.149038	0.375	0.062802	0.072464	0.033816	0.004808	0.149038	0.514423	0.711538	1	0.230769	0.293269	0.596154	0.697115	0.961538	0.038462	0.346154	0.456731	0.745192	0.985577	0.461538	0.396135	0.019231	0.360577	0.514423	0.745192	0.975962	0.254808
0.348238	0.407859	0.243902	0.255088	0.195387	0.170963	0.00813	0.239837	0.463415	0.701897	0.998645	0.00271	0.226287	0.440379	0.765583	0.99729	0.001355	0.314363	0.571816	0.768293	1	0.655827	0.150407	0.193767	0.067843	0.059701	0.005427	0.001355	0.222222	0.428184	0.677507	1	0.014905	0.318428	0.577236	0.754743	0.936314	0.02168	0.384824	0.558266	0.882114	0.993225	0.397019	0.415197	0.01355	0.342818	0.554201	0.772358	0.993225	0.399729
0.337017	0.359116	0.303867	0.266667	0.194444	0.2	0.01105	0.259669	0.497238	0.756906	1	0.033149	0.20442	0.469613	0.745856	0.977901	0.005525	0.265193	0.464088	0.690608	0.98895	0.486188	0.425414	0.088398	0.138889	0.05	0.005556	0.005525	0.281768	0.502762	0.762431	1	0.016575	0.18232	0.375691	0.679558	0.895028	0.524862	0.58011	0.61326	0.961326	0.98895	0.508287	0.366667	0.016575	0.20442	0.425414	0.690608	0.98895	0.392265
0.289593	0.420814	0.289593	0.213636	0.159091	0.227273	0.022624	0.20362	0.542986	0.80543	0.995475	0.00905	0.208145	0.470588	0.687783	1	0.004525	0.303167	0.488688	0.764706	0.986425	0.647059	0.180995	0.171946	0.081818	0.054545	0.018182	0.004525	0.221719	0.538462	0.782805	1	0.167421	0.447964	0.651584	0.764706	0.941176	0.022624	0.117647	0.348416	0.402715	0.977376	0.533937	0.263636	0.099548	0.348416	0.547511	0.742081	0.972851	0.434389
0.516854	0.235955	0.247191	0.220339	0.231638	0.135593	0.022472	0.303371	0.550562	0.808989	0.988764	0.011236	0.191011	0.432584	0.719101	1	0.005618	0.174157	0.410112	0.657303	0.994382	0.353933	0.095506	0.550562	0.045198	0.101695	0	0.005618	0.08427	0.460674	0.769663	1	0.404494	0.421348	0.44382	0.483146	0.870787	0.117978	0.264045	0.567416	0.758427	0.977528	0.410112	0.440678	0.039326	0.224719	0.432584	0.606742	0.960674	0.230337
0.374652	0.264624	0.360724	0.205021	0.304045	0.188285	0.008357	0.252089	0.506964	0.747911	1	0.005571	0.267409	0.550139	0.770195	0.998607	0.001393	0.225627	0.456825	0.714485	0.997214	0.470752	0.231198	0.29805	0.090656	0.059972	0.001395	0.001393	0.203343	0.435933	0.71727	1	0.044568	0.194986	0.44429	0.834262	0.980501	0.006964	0.345404	0.558496	0.725627	0.994429	0.575209	0.421199	0.004178	0.253482	0.48468	0.743733	0.997214	0.275766
0.313187	0.478022	0.208791	0.250689	0.162534	0.190083	0.008242	0.197802	0.409341	0.667582	0.989011	0.019231	0.368132	0.623626	0.802198	0.997253	0.002747	0.151099	0.343407	0.598901	1	0.431319	0.159341	0.409341	0.071625	0.060606	0	0.002747	0.236264	0.489011	0.752747	1	0.008242	0.104396	0.285714	0.384615	0.56044	0.041209	0.357143	0.626374	0.804945	0.994505	0.568681	0.391185	0.005495	0.288462	0.60989	0.799451	0.991758	0.43956
0.40724	0.276018	0.316742	0.245455	0.240909	0.154545	0.00905	0.280543	0.579186	0.773756	1	0.054299	0.20362	0.502262	0.760181	0.995475	0.004525	0.226244	0.420814	0.633484	0.9819	0.316742	0.095023	0.588235	0.040909	0.086364	0.004545	0.004525	0.153846	0.447964	0.755656	1	0.117647	0.773756	0.828054	0.850679	0.886878	0.0181	0.235294	0.470588	0.633484	0.986425	0.502262	0.363636	0.0181	0.21267	0.434389	0.628959	0.9819	0.244344
0.390244	0.34334	0.266417	0.229323	0.24812	0.171053	0.013133	0.247655	0.478424	0.748593	0.994371	0.003752	0.292683	0.527205	0.742964	1	0.001876	0.212008	0.474672	0.756098	0.998124	0.562852	0.135084	0.302064	0.06015	0.067669	0.007519	0.001876	0.35272	0.555347	0.818011	1	0.015009	0.566604	0.688555	0.786116	0.981238	0.018762	0.140713	0.253283	0.472795	0.938086	0.35272	0.417293	0.009381	0.21576	0.529081	0.793621	0.979362	0.377111
0.336207	0.327586	0.336207	0.234783	0.234783	0.2	0.017241	0.206897	0.474138	0.681034	0.965517	0.051724	0.275862	0.517241	0.741379	0.982759	0.008621	0.232759	0.465517	0.758621	1	0.224138	0.422414	0.353448	0.052174	0.052174	0.017391	0.008621	0.051724	0.284483	0.577586	1	0.068966	0.655172	0.758621	0.87931	0.991379	0.172414	0.25	0.37069	0.5	0.637931	0.482759	0.486957	0.077586	0.25	0.482759	0.706897	0.982759	0.327586
0.312925	0.459184	0.227891	0.208191	0.116041	0.201365	0.047619	0.241497	0.452381	0.591837	1	0.006803	0.238095	0.588435	0.772109	0.993197	0.003401	0.302721	0.482993	0.789116	0.996599	0.721088	0.108844	0.170068	0.037543	0.030717	0.003413	0.003401	0.261905	0.578231	0.758503	1	0.064626	0.340136	0.387755	0.428571	0.482993	0.122449	0.159864	0.520408	0.887755	0.952381	0.411565	0.279863	0.010204	0.183673	0.656463	0.836735	0.986395	0.506803
0.328592	0.361309	0.3101	0.270655	0.19943	0.252137	0.008535	0.28734	0.524893	0.780939	0.995733	0.002845	0.201991	0.450925	0.69559	1	0.001422	0.27596	0.523471	0.761024	0.998578	0.409673	0.186344	0.403983	0.086895	0.066952	0.007123	0.001422	0.302987	0.499289	0.796586	1	0.009957	0.186344	0.418208	0.890469	0.997155	0.032717	0.278805	0.550498	0.687055	0.927454	0.536273	0.378917	0.01138	0.26458	0.480797	0.708393	0.998578	0.376956
0.364217	0.36262	0.273163	0.2432	0.1792	0.2016	0.01278	0.180511	0.460064	0.785942	0.996805	0.003195	0.238019	0.461661	0.693291	0.998403	0.001597	0.367412	0.565495	0.755591	1	0.5623	0.123003	0.314696	0.0448	0.0832	0.0064	0.001597	0.167732	0.322684	0.672524	1	0.28754	0.536741	0.65655	0.803514	0.884984	0.031949	0.397764	0.578275	0.779553	0.996805	0.448882	0.3072	0.022364	0.391374	0.552716	0.761981	0.995208	0.42492
0.3008	0.4096	0.2896	0.221154	0.182692	0.248397	0.0048	0.248	0.4576	0.7376	0.9888	0.0032	0.2304	0.4976	0.7456	1	0.0016	0.28	0.5472	0.7664	0.9952	0.536	0.1984	0.2656	0.060897	0.057692	0.003205	0.0016	0.1952	0.4224	0.7088	1	0.1152	0.3872	0.528	0.7712	0.9408	0.0608	0.3056	0.5616	0.7552	0.8944	0.4992	0.397436	0.008	0.2992	0.5344	0.7504	0.9952	0.4256
0.352717	0.341277	0.306006	0.212786	0.228053	0.22042	0.00572	0.285033	0.508103	0.769304	0.999047	0.001907	0.22307	0.485224	0.730219	0.996187	0.000953	0.242135	0.490944	0.716873	1	0.319352	0.102955	0.577693	0.039122	0.08874	0.002863	0.000953	0.335558	0.522402	0.754051	1	0.225929	0.442326	0.645377	0.703527	0.931363	0.00858	0.182078	0.382269	0.748332	0.999047	0.502383	0.391221	0.009533	0.239276	0.510963	0.743565	0.99428	0.375596
0.353333	0.306667	0.34	0.202673	0.238307	0.193764	0.004444	0.302222	0.522222	0.797778	0.997778	0.006667	0.18	0.464444	0.737778	0.995556	0.002222	0.251111	0.493333	0.711111	1	0.411111	0.173333	0.415556	0.055679	0.095768	0.006682	0.002222	0.277778	0.573333	0.835556	1	0.095556	0.284444	0.466667	0.668889	0.784444	0.011111	0.195556	0.431111	0.688889	0.993333	0.542222	0.347439	0.011111	0.213333	0.413333	0.68	0.991111	0.322222
0.396226	0.306604	0.29717	0.218009	0.274882	0.146919	0.014151	0.240566	0.528302	0.740566	0.995283	0.009434	0.169811	0.481132	0.745283	1	0.004717	0.283019	0.471698	0.716981	0.966981	0.466981	0.150943	0.382075	0.056872	0.066351	0.028436	0.004717	0.146226	0.495283	0.768868	1	0.20283	0.264151	0.575472	0.896226	0.981132	0.037736	0.311321	0.419811	0.712264	0.948113	0.457547	0.417062	0.018868	0.325472	0.476415	0.698113	0.981132	0.287736
0.328571	0.332143	0.339286	0.207885	0.229391	0.240143	0.007143	0.3	0.571429	0.803571	0.989286	0.046429	0.235714	0.439286	0.642857	1	0.003571	0.189286	0.482143	0.760714	0.992857	0.392857	0.217857	0.389286	0.064516	0.078853	0.014337	0.003571	0.307143	0.564286	0.832143	1	0.010714	0.078571	0.246429	0.585714	0.896429	0.110714	0.296429	0.475	0.75	0.985714	0.492857	0.444444	0.010714	0.242857	0.467857	0.721429	0.992857	0.375
0.394928	0.235507	0.369565	0.152727	0.32	0.167273	0.007246	0.231884	0.471014	0.768116	0.996377	0.01087	0.224638	0.543478	0.67029	0.963768	0.003623	0.26087	0.503623	0.742754	1	0.394928	0.188406	0.416667	0.050909	0.094545	0.007273	0.003623	0.163043	0.40942	0.666667	1	0.134058	0.300725	0.387681	0.612319	0.706522	0.036232	0.264493	0.539855	0.84058	0.992754	0.550725	0.421818	0.021739	0.23913	0.481884	0.684783	0.98913	0.271739
0.37963	0.296296	0.324074	0.261682	0.196262	0.205607	0.027778	0.222222	0.490741	0.777778	1	0.064815	0.231481	0.481481	0.648148	0.972222	0.009259	0.259259	0.425926	0.731481	0.981481	0.416667	0.555556	0.027778	0.186916	0.018692	0	0.009259	0.305556	0.518519	0.75	1	0.055556	0.259259	0.444444	0.694444	0.972222	0.018519	0.018519	0.018519	0.027778	0.037037	0.444444	0.35514	0.055556	0.268519	0.537037	0.675926	0.981481	0.351852
0.351598	0.410959	0.237443	0.284404	0.169725	0.155963	0.027397	0.237443	0.479452	0.721461	1	0.009132	0.242009	0.56621	0.780822	0.990868	0.004566	0.26484	0.474886	0.643836	0.876712	0.447489	0.077626	0.474886	0.045872	0.073394	0	0.004566	0.287671	0.561644	0.780822	1	0.045662	0.639269	0.666667	0.694064	0.744292	0.086758	0.219178	0.401826	0.60274	0.917808	0.420091	0.40367	0.050228	0.269406	0.520548	0.675799	0.90411	0.369863
0.448276	0.364532	0.187192	0.337171	0.143092	0.157895	0.004926	0.228243	0.382594	0.650246	0.995074	0.003284	0.188834	0.472906	0.727422	1	0.001642	0.546798	0.692939	0.863711	0.996716	0.663383	0.085386	0.251232	0.03125	0.067434	0.004934	0.001642	0.183908	0.349754	0.617406	1	0.047619	0.614122	0.707718	0.821018	0.906404	0.029557	0.535304	0.668309	0.885057	0.995074	0.308703	0.213816	0.00821	0.579639	0.706076	0.850575	0.99179	0.425287
0.344262	0.32377	0.331967	0.246914	0.263374	0.197531	0.02459	0.262295	0.491803	0.72541	0.995902	0.012295	0.217213	0.528689	0.762295	0.987705	0.004098	0.241803	0.446721	0.717213	1	0.471311	0.393443	0.135246	0.139918	0.032922	0	0.004098	0.209016	0.52459	0.729508	1	0.086066	0.42623	0.651639	0.815574	0.995902	0.016393	0.151639	0.184426	0.22541	0.463115	0.532787	0.36214	0.012295	0.27459	0.540984	0.75	0.991803	0.307377
0.31358	0.346914	0.339506	0.211372	0.236094	0.236094	0.002469	0.261728	0.541975	0.765432	0.998765	0.004938	0.249383	0.460494	0.720988	0.993827	0.001235	0.225926	0.507407	0.744444	1	0.465432	0.246914	0.287654	0.100124	0.053152	0.003708	0.001235	0.208642	0.488889	0.749383	1	0.039506	0.2	0.409877	0.748148	0.998765	0.006173	0.316049	0.565432	0.693827	0.990123	0.55679	0.407911	0.003704	0.245679	0.462963	0.737037	0.996296	0.380247
0.311628	0.362791	0.325581	0.214953	0.219626	0.242991	0.009302	0.255814	0.455814	0.725581	1	0.037209	0.297674	0.567442	0.706977	0.986047	0.004651	0.172093	0.465116	0.809302	0.995349	0.572093	0.395349	0.032558	0.11215	0.009346	0	0.004651	0.302326	0.604651	0.748837	1	0.023256	0.153488	0.409302	0.795349	0.95814	0.316279	0.316279	0.325581	0.334884	0.344186	0.55814	0.336449	0.018605	0.24186	0.534884	0.75814	0.967442	0.348837
0.367521	0.316239	0.316239	0.24339	0.232504	0.195179	0.002331	0.216006	0.483294	0.749029	0.993007	0.001554	0.227661	0.452991	0.71251	0.999223	0.000777	0.307692	0.556333	0.787102	1	0.477078	0.099456	0.423465	0.044323	0.081649	0.003888	0.000777	0.177933	0.401709	0.700078	1	0.027195	0.324786	0.540016	0.714064	0.995338	0.006216	0.346542	0.610723	0.836053	0.997669	0.503497	0.402799	0.003885	0.285936	0.531469	0.756022	0.998446	0.33411
0.396296	0.3	0.303704	0.200743	0.263941	0.200743	0.007407	0.211111	0.466667	0.737037	1	0.011111	0.248148	0.459259	0.733333	0.948148	0.003704	0.318519	0.533333	0.755556	0.996296	0.418519	0.111111	0.47037	0.070632	0.063197	0.003717	0.003704	0.114815	0.585185	0.840741	1	0.040741	0.422222	0.540741	0.696296	0.925926	0.107407	0.248148	0.366667	0.651852	0.992593	0.411111	0.446097	0.014815	0.418519	0.585185	0.77037	0.996296	0.266667
0.347286	0.339412	0.313303	0.221808	0.22927	0.21476	0.004973	0.237464	0.478243	0.736842	0.998757	0.000829	0.22586	0.507667	0.750104	1	0.000414	0.27932	0.521343	0.760464	0.999586	0.420638	0.138417	0.440945	0.05597	0.075041	0.006219	0.000414	0.183589	0.494405	0.756734	1	0.012433	0.452549	0.670949	0.878574	0.984252	0.033154	0.279735	0.445089	0.688355	0.999171	0.565271	0.396352	0.004559	0.270203	0.507667	0.741815	0.999586	0.334853
0.43609	0.353383	0.210526	0.219697	0.181818	0.159091	0.015038	0.210526	0.451128	0.631579	1	0.022556	0.360902	0.609023	0.819549	0.984962	0.007519	0.157895	0.511278	0.721805	0.977444	0.609023	0.120301	0.270677	0.060606	0.060606	0	0.007519	0.255639	0.406015	0.81203	1	0.045113	0.067669	0.135338	0.24812	0.969925	0.180451	0.496241	0.56391	0.729323	0.796992	0.368421	0.257576	0.030075	0.135338	0.503759	0.714286	0.962406	0.398496
0.434211	0.25	0.315789	0.205298	0.304636	0.165563	0.013158	0.276316	0.460526	0.684211	1	0.085526	0.256579	0.552632	0.769737	0.986842	0.006579	0.164474	0.539474	0.796053	0.993421	0.355263	0.315789	0.328947	0.13245	0.05298	0.013245	0.006579	0.144737	0.552632	0.763158	1	0.013158	0.243421	0.605263	0.868421	0.967105	0.059211	0.309211	0.394737	0.473684	0.802632	0.375	0.450331	0.019737	0.197368	0.506579	0.723684	0.953947	0.263158
0.4	0.241379	0.358621	0.180556	0.277778	0.180556	0.027586	0.282759	0.517241	0.717241	0.972414	0.013793	0.158621	0.503448	0.765517	0.951724	0.006897	0.193103	0.434483	0.737931	1	0.365517	0.310345	0.324138	0.111111	0.083333	0.013889	0.006897	0.227586	0.448276	0.710345	1	0.02069	0.268966	0.489655	0.675862	0.993103	0.048276	0.117241	0.524138	0.793103	0.917241	0.503448	0.472222	0.02069	0.241379	0.475862	0.731034	0.97931	0.262069
0.421053	0.294737	0.284211	0.255319	0.234043	0.170213	0.021053	0.315789	0.642105	0.821053	0.989474	0.052632	0.273684	0.452632	0.621053	0.957895	0.010526	0.157895	0.368421	0.578947	1	0.6	0.263158	0.136842	0.085106	0.06383	0	0.010526	0.294737	0.505263	0.8	1	0.094737	0.147368	0.252632	0.368421	0.557895	0.610526	0.631579	0.663158	0.694737	0.968421	0.336842	0.340426	0.042105	0.178947	0.389474	0.484211	0.968421	0.336842
0.392321	0.305509	0.30217	0.250836	0.225753	0.190635	0.021703	0.228715	0.465776	0.737896	1	0.005008	0.230384	0.504174	0.786311	0.998331	0.001669	0.287145	0.517529	0.729549	0.996661	0.347245	0.038397	0.614357	0.018395	0.091973	0.005017	0.001669	0.328881	0.616027	0.891486	1	0.006678	0.016694	0.131886	0.434057	0.813022	0.026711	0.24374	0.492487	0.686144	0.994992	0.462437	0.367893	0.005008	0.235392	0.470785	0.702838	0.996661	0.307179
0.328125	0.375	0.296875	0.215686	0.168627	0.215686	0.070312	0.300781	0.519531	0.792969	0.984375	0.007812	0.195312	0.488281	0.71875	0.996094	0.003906	0.191406	0.492188	0.6875	1	0.554688	0.246094	0.199219	0.070588	0.054902	0.007843	0.003906	0.195312	0.476562	0.804688	1	0.015625	0.527344	0.632812	0.757812	0.878906	0.019531	0.199219	0.253906	0.410156	0.972656	0.34375	0.4	0.023438	0.238281	0.5	0.691406	0.972656	0.375
0.382139	0.419522	0.198339	0.267152	0.138254	0.155925	0.005192	0.283489	0.528557	0.797508	0.995846	0.003115	0.253375	0.505711	0.751817	1	0.001038	0.195223	0.413292	0.654206	0.966771	0.64486	0.095535	0.259605	0.053015	0.071726	0.003119	0.001038	0.233645	0.483904	0.779855	1	0.006231	0.264798	0.491173	0.732087	0.856698	0.016615	0.244029	0.509865	0.697819	0.993769	0.336449	0.293139	0.004154	0.141225	0.390447	0.63136	0.966771	0.439252
0.359081	0.335073	0.305846	0.238245	0.212121	0.211076	0.003132	0.228601	0.461378	0.713987	1	0.004175	0.245303	0.505219	0.755741	0.998956	0.001044	0.276618	0.524008	0.77453	0.997912	0.460334	0.228601	0.311065	0.08255	0.059561	0.007315	0.001044	0.267223	0.461378	0.740084	1	0.006263	0.308977	0.512526	0.7881	0.968685	0.009395	0.192067	0.605428	0.755741	0.878914	0.530271	0.342738	0.007307	0.262004	0.524008	0.742171	0.982255	0.348643
0.35473	0.572635	0.072635	0.351946	0.05753	0.052453	0.005068	0.233108	0.447635	0.689189	0.996622	0.003378	0.228041	0.552365	0.790541	1	0.001689	0.407095	0.486486	0.548986	0.974662	0.902027	0.050676	0.047297	0.027073	0.013536	0	0.001689	0.239865	0.547297	0.773649	1	0.059122	0.403716	0.461149	0.488176	0.628378	0.14527	0.157095	0.427365	0.5	0.511824	0.570946	0.368866	0.011824	0.293919	0.554054	0.798986	0.996622	0.569257
0.30625	0.325	0.36875	0.176101	0.201258	0.27673	0.04375	0.26875	0.49375	0.725	0.975	0.0125	0.21875	0.425	0.7375	0.99375	0.00625	0.2375	0.50625	0.75	1	0.34375	0.025	0.63125	0.012579	0.075472	0.012579	0.00625	0.08125	0.3625	0.83125	1	0.0875	0.0875	0.09375	0.1	0.74375	0.13125	0.3125	0.5125	0.6875	0.93125	0.53125	0.339623	0.025	0.21875	0.50625	0.69375	0.9875	0.34375
0.335821	0.380597	0.283582	0.293233	0.18797	0.233083	0.037313	0.246269	0.455224	0.701493	0.985075	0.014925	0.223881	0.514925	0.723881	0.977612	0.007463	0.238806	0.5	0.768657	1	0.373134	0.350746	0.276119	0.172932	0.052632	0.007519	0.007463	0.328358	0.559701	0.723881	1	0.179104	0.380597	0.552239	0.813433	0.992537	0.037313	0.097015	0.246269	0.313433	0.91791	0.477612	0.406015	0.037313	0.246269	0.567164	0.791045	0.992537	0.373134
0.272959	0.459184	0.267857	0.253197	0.15601	0.26087	0.017857	0.255102	0.492347	0.760204	0.989796	0.007653	0.247449	0.512755	0.742347	1	0.002551	0.232143	0.471939	0.737245	0.997449	0.354592	0.22449	0.420918	0.081841	0.071611	0	0.002551	0.267857	0.487245	0.803571	1	0.020408	0.19898	0.40051	0.540816	0.997449	0.058673	0.255102	0.586735	0.762755	0.979592	0.59949	0.434783	0.015306	0.280612	0.505102	0.737245	0.992347	0.52551
0.351682	0.316514	0.331804	0.192956	0.222052	0.217458	0.006116	0.262997	0.547401	0.750765	1	0.003058	0.233945	0.454128	0.698777	0.995413	0.001529	0.247706	0.486239	0.769113	0.990826	0.545872	0.172783	0.281346	0.07657	0.073507	0	0.001529	0.270642	0.550459	0.70948	1	0.067278	0.321101	0.602446	0.810398	0.990826	0.007645	0.17737	0.35474	0.732416	0.934251	0.5	0.352221	0.007645	0.233945	0.457187	0.785933	0.990826	0.334862
0.313433	0.447761	0.238806	0.227273	0.212121	0.19697	0.029851	0.343284	0.507463	0.850746	1	0.044776	0.19403	0.402985	0.686567	0.985075	0.014925	0.238806	0.462687	0.58209	0.910448	0.522388	0.343284	0.134328	0.151515	0.030303	0	0.014925	0.119403	0.402985	0.626866	1	0.164179	0.223881	0.447761	0.641791	0.776119	0.850746	0.865672	0.895522	0.925373	0.970149	0.402985	0.484848	0.074627	0.238806	0.522388	0.641791	0.970149	0.447761
0.370272	0.412077	0.217651	0.255644	0.168659	0.177291	0.003318	0.261447	0.510949	0.770405	1	0.001327	0.252157	0.457863	0.704048	0.998673	0.000664	0.209025	0.520239	0.816191	0.999336	0.668879	0.140013	0.191108	0.058433	0.045153	0.002656	0.000664	0.266092	0.473789	0.74718	1	0.063703	0.275382	0.613139	0.909091	0.984074	0.022561	0.151958	0.50365	0.631055	0.996682	0.364964	0.353254	0.003981	0.187127	0.522893	0.826145	0.999336	0.419376
0.349593	0.406504	0.243902	0.226069	0.181263	0.189409	0.006098	0.21748	0.481707	0.697154	0.993902	0.004065	0.270325	0.565041	0.778455	0.995935	0.002033	0.268293	0.455285	0.711382	1	0.603659	0.103659	0.292683	0.03666	0.089613	0.004073	0.002033	0.221545	0.518293	0.776423	1	0.030488	0.26626	0.380081	0.528455	0.955285	0.028455	0.24187	0.449187	0.713415	0.932927	0.392276	0.362525	0.028455	0.24187	0.46748	0.73374	0.997967	0.418699
0.341121	0.327103	0.331776	0.211268	0.234742	0.248826	0.023364	0.28972	0.485981	0.799065	1	0.009346	0.228972	0.514019	0.733645	0.957944	0.004673	0.182243	0.481308	0.719626	0.995327	0.397196	0.364486	0.238318	0.140845	0.028169	0	0.004673	0.28972	0.602804	0.878505	1	0.11215	0.242991	0.406542	0.668224	0.939252	0.014019	0.065421	0.471963	0.53271	0.869159	0.481308	0.450704	0.014019	0.200935	0.495327	0.672897	0.962617	0.32243
0.37247	0.303644	0.323887	0.22027	0.240541	0.214865	0.004049	0.288799	0.54386	0.784076	1	0.005398	0.194332	0.450742	0.721997	0.995951	0.00135	0.245614	0.48583	0.735493	0.99865	0.411606	0.167341	0.421053	0.07973	0.078378	0.002703	0.00135	0.306343	0.489879	0.804318	0.99865	0.004049	0.17004	0.34278	0.900135	1	0.025641	0.268556	0.541161	0.678812	0.932524	0.51552	0.378378	0.005398	0.249663	0.466937	0.680162	0.99865	0.300945
0.334365	0.331269	0.334365	0.22314	0.231405	0.245868	0.004128	0.214654	0.480908	0.726522	0.998968	0.008256	0.257998	0.522188	0.75645	0.992776	0.001032	0.260062	0.49742	0.762642	1	0.465428	0.224974	0.309598	0.083678	0.069215	0.005165	0.001032	0.220846	0.449948	0.657379	1	0.003096	0.216718	0.499484	0.675955	0.988648	0.038184	0.293086	0.608875	0.816305	0.996904	0.561404	0.380165	0.007224	0.30031	0.54902	0.77709	0.996904	0.345717
0.42069	0.255172	0.324138	0.180556	0.298611	0.138889	0.013793	0.282759	0.427586	0.675862	1	0.062069	0.172414	0.606897	0.8	0.97931	0.006897	0.206897	0.510345	0.731034	0.972414	0.351724	0.282759	0.365517	0.118056	0.0625	0.006944	0.006897	0.144828	0.558621	0.744828	1	0.013793	0.193103	0.6	0.882759	0.97931	0.165517	0.331034	0.42069	0.648276	0.82069	0.37931	0.444444	0.02069	0.193103	0.510345	0.724138	0.972414	0.282759
0.22449	0.462585	0.312925	0.205479	0.136986	0.287671	0.034014	0.217687	0.346939	0.496599	0.986395	0.013605	0.367347	0.659864	0.85034	0.993197	0.006803	0.197279	0.442177	0.612245	1	0.632653	0.312925	0.054422	0.061644	0.020548	0.006849	0.006803	0.37415	0.680272	0.836735	1	0.088435	0.183673	0.29932	0.44898	0.557823	0.020408	0.027211	0.040816	0.489796	0.503401	0.612245	0.315068	0.040816	0.251701	0.52381	0.727891	0.979592	0.462585
0.36377	0.416789	0.21944	0.262537	0.179941	0.165192	0.002946	0.265096	0.477172	0.734904	0.994109	0.005891	0.216495	0.546392	0.740795	0.997054	0.001473	0.253314	0.458027	0.762887	1	0.689249	0.029455	0.281296	0.022124	0.081121	0.013274	0.001473	0.215022	0.5243	0.733432	1	0.032401	0.409426	0.425626	0.837997	0.949926	0.050074	0.301915	0.466863	0.904271	0.991163	0.322533	0.39823	0.011782	0.284242	0.513991	0.751105	0.995582	0.409426
0.331288	0.323108	0.345603	0.196721	0.221311	0.239754	0.00818	0.155419	0.453988	0.744376	0.997955	0.00409	0.267894	0.476483	0.762781	1	0.002045	0.306748	0.535787	0.725971	0.989775	0.486708	0.167689	0.345603	0.063525	0.071721	0.006148	0.002045	0.128834	0.321063	0.650307	1	0.014315	0.425358	0.631902	0.764826	0.9182	0.01227	0.382413	0.560327	0.785276	0.99182	0.523517	0.364754	0.006135	0.333333	0.525562	0.766871	0.97955	0.359918
0.386905	0.321429	0.291667	0.251497	0.215569	0.215569	0.029762	0.255952	0.434524	0.630952	0.964286	0.011905	0.303571	0.577381	0.779762	0.982143	0.005952	0.190476	0.47619	0.77381	1	0.434524	0.339286	0.22619	0.149701	0.053892	0.005988	0.005952	0.386905	0.52381	0.708333	1	0.142857	0.321429	0.565476	0.833333	0.994048	0.029762	0.077381	0.202381	0.64881	0.934524	0.505952	0.371257	0.029762	0.238095	0.571429	0.791667	0.994048	0.309524
0.425197	0.326772	0.248031	0.252964	0.209486	0.150198	0.007874	0.26378	0.507874	0.818898	1	0.023622	0.299213	0.551181	0.755906	0.996063	0.003937	0.177165	0.401575	0.574803	0.968504	0.472441	0.122047	0.405512	0.047431	0.079051	0.007905	0.003937	0.358268	0.673228	0.838583	1	0.047244	0.070866	0.42126	0.543307	0.582677	0.011811	0.204724	0.397638	0.649606	0.933071	0.385827	0.332016	0.035433	0.153543	0.34252	0.547244	0.968504	0.346457
0.402801	0.382208	0.214992	0.295136	0.169827	0.15169	0.002471	0.177924	0.401153	0.706755	0.995881	0.001647	0.228171	0.454695	0.71911	0.998353	0.000824	0.484349	0.654036	0.83196	1	0.651565	0.158155	0.19028	0.061006	0.029678	0.001649	0.000824	0.162273	0.325371	0.652389	1	0.341021	0.453871	0.642504	0.810544	0.999176	0.367381	0.522241	0.699341	0.859143	0.987644	0.381384	0.253916	0.093081	0.490115	0.694399	0.85173	0.999176	0.367381
0.346341	0.395122	0.258537	0.240196	0.186275	0.20098	0.014634	0.190244	0.414634	0.717073	1	0.009756	0.346341	0.64878	0.863415	0.990244	0.004878	0.204878	0.404878	0.560976	0.8	0.360976	0.087805	0.55122	0.04902	0.068627	0	0.004878	0.170732	0.463415	0.726829	1	0.04878	0.639024	0.673171	0.702439	0.75122	0.092683	0.243902	0.453659	0.829268	0.970732	0.390244	0.392157	0.053659	0.263415	0.487805	0.619512	0.931707	0.4
0.341463	0.429268	0.229268	0.303922	0.151961	0.215686	0.029268	0.2	0.560976	0.795122	1	0.009756	0.282927	0.439024	0.717073	0.985366	0.004878	0.214634	0.497561	0.668293	0.980488	0.521951	0.121951	0.356098	0.058824	0.088235	0	0.004878	0.253659	0.55122	0.814634	1	0.165854	0.190244	0.239024	0.297561	0.629268	0.058537	0.336585	0.463415	0.702439	0.878049	0.556098	0.382353	0.019512	0.24878	0.439024	0.614634	0.965854	0.443902
0.301136	0.400568	0.298295	0.225071	0.185185	0.239316	0.005682	0.176136	0.420455	0.644886	0.997159	0.014205	0.318182	0.568182	0.803977	1	0.002841	0.238636	0.454545	0.707386	0.985795	0.534091	0.190341	0.275568	0.068376	0.05698	0	0.002841	0.269886	0.525568	0.803977	1	0.045455	0.173295	0.332386	0.585227	0.826705	0.008523	0.255682	0.539773	0.721591	0.948864	0.471591	0.358974	0.017045	0.261364	0.556818	0.8125	0.991477	0.380682
0.3375	0.370833	0.291667	0.23431	0.150628	0.225941	0.020833	0.233333	0.541667	0.783333	0.9875	0.016667	0.1875	0.408333	0.679167	0.995833	0.004167	0.308333	0.5375	0.729167	1	0.541667	0.2125	0.245833	0.062762	0.062762	0.012552	0.004167	0.15	0.2875	0.579167	1	0.008333	0.3875	0.591667	0.783333	0.995833	0.120833	0.441667	0.670833	0.8375	0.95	0.425	0.343096	0.0125	0.404167	0.575	0.7375	0.991667	0.408333
0.478723	0.297872	0.223404	0.290323	0.204301	0.129032	0.031915	0.180851	0.425532	0.744681	0.989362	0.021277	0.276596	0.62766	0.765957	1	0.010638	0.297872	0.468085	0.617021	0.925532	0.148936	0.021277	0.829787	0.021505	0.064516	0	0.010638	0.031915	0.457447	0.702128	1	0.712766	0.712766	0.712766	0.712766	0.723404	0.053191	0.244681	0.489362	0.765957	0.978723	0.319149	0.430108	0.074468	0.297872	0.542553	0.712766	0.925532	0.234043
0.323232	0.373737	0.30303	0.233503	0.182741	0.243655	0.010101	0.227273	0.515152	0.80303	0.969697	0.10101	0.292929	0.520202	0.732323	0.994949	0.005051	0.151515	0.414141	0.671717	1	0.575758	0.161616	0.262626	0.055838	0.06599	0.015228	0.005051	0.313131	0.580808	0.828283	1	0.025253	0.060606	0.277778	0.343434	0.459596	0.080808	0.146465	0.570707	0.737374	0.893939	0.565657	0.324873	0.025253	0.20202	0.40404	0.616162	0.984848	0.348485
0.376825	0.415146	0.208029	0.308676	0.174429	0.155251	0.00365	0.247263	0.512774	0.741788	1	0.001825	0.20073	0.471715	0.738139	0.999088	0.000912	0.355839	0.541971	0.788321	0.998175	0.740876	0.059307	0.199818	0.03653	0.051142	0.003653	0.000912	0.215328	0.458942	0.698905	1	0.02281	0.399635	0.455292	0.643248	0.946168	0.010949	0.414234	0.809307	0.868613	0.933394	0.362226	0.336073	0.004562	0.32573	0.559307	0.788321	0.998175	0.423358
0.355372	0.297521	0.347107	0.204969	0.267081	0.186335	0.018595	0.229339	0.541322	0.791322	0.997934	0.004132	0.204545	0.42562	0.702479	1	0.002066	0.289256	0.506198	0.741736	0.995868	0.450413	0.173554	0.376033	0.066253	0.086957	0.004141	0.002066	0.130165	0.402893	0.719008	1	0.008264	0.419421	0.621901	0.762397	0.927686	0.115702	0.316116	0.52686	0.739669	0.993802	0.528926	0.356108	0.004132	0.318182	0.514463	0.764463	0.995868	0.340909
0.30814	0.383721	0.30814	0.251462	0.187135	0.216374	0.011628	0.174419	0.395349	0.715116	1	0.034884	0.290698	0.540698	0.755814	0.994186	0.005814	0.203488	0.5	0.703488	0.988372	0.348837	0.232558	0.418605	0.093567	0.081871	0.011696	0.005814	0.244186	0.453488	0.697674	1	0.087209	0.186047	0.267442	0.540698	0.627907	0.052326	0.354651	0.709302	0.843023	0.988372	0.552326	0.421053	0.063953	0.30814	0.552326	0.72093	0.988372	0.412791
0.443243	0.288288	0.268468	0.241877	0.232852	0.166065	0.003604	0.23964	0.52973	0.733333	1	0.014414	0.277477	0.472072	0.758559	0.990991	0.001802	0.210811	0.484685	0.756757	0.996396	0.499099	0.12973	0.371171	0.046931	0.079422	0	0.001802	0.227027	0.452252	0.65045	1	0.138739	0.243243	0.326126	0.781982	0.899099	0.07027	0.331532	0.605405	0.863063	0.987387	0.322523	0.33935	0.005405	0.181982	0.394595	0.803604	0.996396	0.331532
0.385768	0.35206	0.262172	0.263158	0.210526	0.229323	0.007491	0.220974	0.434457	0.737828	0.996255	0.011236	0.333333	0.610487	0.812734	1	0.003745	0.179775	0.40824	0.64794	0.985019	0.303371	0.265918	0.430712	0.075188	0.067669	0.007519	0.003745	0.134831	0.531835	0.76779	1	0.044944	0.138577	0.28839	0.794007	0.985019	0.161049	0.385768	0.509363	0.726592	0.93633	0.464419	0.473684	0.022472	0.2397	0.505618	0.722846	0.985019	0.430712
0.386861	0.357664	0.255474	0.245421	0.212454	0.194139	0.010949	0.222628	0.489051	0.733577	1	0.007299	0.244526	0.514599	0.656934	0.985401	0.00365	0.259124	0.474453	0.79562	0.992701	0.594891	0.259124	0.145985	0.080586	0.058608	0	0.00365	0.310219	0.50365	0.671533	1	0.032847	0.127737	0.30292	0.813869	0.978102	0.171533	0.354015	0.620438	0.886861	0.923358	0.368613	0.336996	0.014599	0.277372	0.474453	0.773723	0.974453	0.379562
0.383249	0.398477	0.218274	0.333333	0.16285	0.160305	0.01269	0.274112	0.467005	0.753807	1	0.005076	0.271574	0.527919	0.730964	0.994924	0.002538	0.180203	0.489848	0.769036	0.989848	0.713198	0.137056	0.149746	0.05598	0.050891	0.005089	0.002538	0.225888	0.428934	0.695431	1	0.010152	0.251269	0.64467	0.784264	0.98731	0.058376	0.489848	0.593909	0.819797	0.939086	0.357868	0.300254	0.040609	0.203046	0.451777	0.730964	0.989848	0.439086
0.328829	0.405405	0.265766	0.289593	0.199095	0.180995	0.009009	0.202703	0.382883	0.693694	0.995495	0.045045	0.333333	0.536036	0.765766	0.990991	0.004505	0.13964	0.513514	0.734234	1	0.445946	0.211712	0.342342	0.095023	0.085973	0.004525	0.004505	0.333333	0.603604	0.837838	1	0.009009	0.162162	0.414414	0.612613	0.936937	0.040541	0.243243	0.328829	0.689189	0.986486	0.364865	0.41629	0.013514	0.198198	0.445946	0.68018	0.986486	0.423423
0.316731	0.372925	0.310345	0.21867	0.212276	0.236573	0.006386	0.293742	0.49553	0.766284	1	0.002554	0.229885	0.517241	0.756066	0.998723	0.001277	0.234994	0.480204	0.727969	0.989783	0.421456	0.254151	0.324393	0.076726	0.058824	0.005115	0.001277	0.190294	0.512133	0.720307	1	0.010217	0.199234	0.598978	0.828863	0.992337	0.034483	0.323116	0.430396	0.733078	0.971903	0.590038	0.355499	0.003831	0.218391	0.485313	0.688378	0.983397	0.403576
0.40081	0.323887	0.275304	0.284553	0.203252	0.182927	0.016194	0.230769	0.51417	0.753036	0.995951	0.008097	0.283401	0.510121	0.789474	1	0.004049	0.246964	0.449393	0.651822	0.983806	0.291498	0.109312	0.59919	0.03252	0.105691	0	0.004049	0.182186	0.34413	0.708502	1	0.469636	0.801619	0.846154	0.882591	0.910931	0.032389	0.275304	0.481781	0.647773	0.979757	0.493927	0.357724	0.032389	0.271255	0.469636	0.668016	0.983806	0.287449
0.337143	0.445714	0.217143	0.333333	0.172414	0.189655	0.028571	0.211429	0.451429	0.697143	0.994286	0.011429	0.234286	0.52	0.782857	1	0.005714	0.291429	0.497143	0.68	0.954286	0.611429	0.154286	0.234286	0.063218	0.051724	0.017241	0.005714	0.165714	0.32	0.605714	1	0.017143	0.445714	0.657143	0.714286	0.845714	0.022857	0.48	0.737143	0.794286	0.937143	0.382857	0.402299	0.022857	0.285714	0.445714	0.657143	0.965714	0.417143
0.384615	0.384615	0.230769	0.322222	0.188889	0.111111	0.032967	0.307692	0.494505	0.78022	0.978022	0.076923	0.197802	0.461538	0.736264	1	0.010989	0.098901	0.428571	0.681319	0.912088	0.461538	0.296703	0.241758	0.111111	0.066667	0	0.010989	0.296703	0.483516	0.736264	1	0.021978	0.076923	0.230769	0.406593	0.593407	0.615385	0.659341	0.791209	0.846154	0.945055	0.450549	0.333333	0.021978	0.21978	0.428571	0.648352	0.912088	0.351648
0.336788	0.357513	0.305699	0.270833	0.25	0.223958	0.015544	0.202073	0.476684	0.746114	0.994819	0.010363	0.243523	0.466321	0.725389	1	0.005181	0.274611	0.497409	0.735751	0.927461	0.440415	0.450777	0.108808	0.125	0.03125	0	0.005181	0.238342	0.590674	0.839378	1	0.020725	0.331606	0.497409	0.678756	0.932642	0.093264	0.11399	0.248705	0.274611	0.715026	0.440415	0.479167	0.025907	0.274611	0.476684	0.704663	0.937824	0.378238
0.425676	0.310811	0.263514	0.265306	0.190476	0.210884	0.013514	0.202703	0.540541	0.810811	1	0.094595	0.22973	0.47973	0.682432	0.993243	0.006757	0.236486	0.412162	0.689189	0.952703	0.547297	0.22973	0.222973	0.108844	0.040816	0	0.006757	0.175676	0.459459	0.763514	1	0.040541	0.222973	0.425676	0.648649	0.858108	0.297297	0.344595	0.587838	0.912162	0.972973	0.344595	0.367347	0.027027	0.256757	0.439189	0.621622	0.959459	0.304054
0.30102	0.428571	0.270408	0.253197	0.173913	0.237852	0.007653	0.227041	0.47449	0.721939	1	0.015306	0.288265	0.556122	0.811224	0.997449	0.002551	0.183673	0.446429	0.69898	0.992347	0.558673	0.214286	0.227041	0.081841	0.051151	0	0.002551	0.265306	0.561224	0.859694	1	0.02551	0.178571	0.392857	0.576531	0.742347	0.056122	0.216837	0.433673	0.691327	0.795918	0.510204	0.286445	0.022959	0.295918	0.594388	0.829082	0.987245	0.428571
0.333938	0.402904	0.263158	0.250909	0.158182	0.229091	0.012704	0.212341	0.508167	0.818512	1	0.00363	0.205082	0.442831	0.716878	0.99637	0.001815	0.321234	0.513612	0.718693	0.970962	0.502722	0.136116	0.361162	0.049091	0.074545	0.005455	0.001815	0.127042	0.366606	0.744102	1	0.168784	0.411978	0.560799	0.720508	0.811252	0.110708	0.346642	0.540835	0.814882	0.958258	0.473684	0.330909	0.005445	0.297641	0.470054	0.693285	0.990926	0.444646
0.440771	0.316804	0.242424	0.279006	0.198895	0.179558	0.008264	0.294766	0.570248	0.763085	1	0.00551	0.206612	0.4573	0.757576	0.986226	0.002755	0.239669	0.446281	0.69697	0.975207	0.592287	0.143251	0.264463	0.060773	0.071823	0.005525	0.002755	0.206612	0.413223	0.757576	1	0.013774	0.231405	0.471074	0.586777	0.977961	0.024793	0.432507	0.628099	0.790634	0.969697	0.38292	0.364641	0.013774	0.250689	0.471074	0.699725	0.986226	0.369146
0.319048	0.37619	0.304762	0.248804	0.181818	0.205742	0.009524	0.219048	0.509524	0.766667	0.995238	0.02381	0.242857	0.433333	0.680952	1	0.004762	0.195238	0.585714	0.809524	0.980952	0.533333	0.152381	0.314286	0.076555	0.066986	0	0.004762	0.257143	0.4	0.695238	1	0.014286	0.080952	0.590476	0.747619	0.92381	0.109524	0.209524	0.566667	0.790476	0.980952	0.509524	0.373206	0.019048	0.319048	0.519048	0.752381	0.980952	0.37619
0.294404	0.389294	0.316302	0.209756	0.185366	0.24878	0.009732	0.182482	0.440389	0.705596	0.995134	0.007299	0.26764	0.515815	0.768856	0.997567	0.002433	0.248175	0.513382	0.781022	1	0.547445	0.184915	0.26764	0.063415	0.058537	0	0.002433	0.23601	0.540146	0.746959	1	0.082725	0.22871	0.403893	0.579075	0.885645	0.043796	0.277372	0.549878	0.79562	0.987835	0.532847	0.4	0.012165	0.291971	0.586375	0.798054	0.992701	0.386861
0.40038	0.337761	0.26186	0.285171	0.224335	0.15019	0.005693	0.225806	0.426945	0.709677	0.996205	0.003795	0.210626	0.455408	0.732448	1	0.001898	0.42315	0.601518	0.802657	0.998102	0.563567	0.148008	0.288425	0.060837	0.04943	0.015209	0.001898	0.189753	0.347249	0.658444	1	0.055028	0.402277	0.667932	0.793169	0.973435	0.00759	0.442125	0.593928	0.806452	0.994307	0.436433	0.406844	0.013283	0.383302	0.574953	0.798861	0.99241	0.368121
0.310734	0.449153	0.240113	0.246459	0.144476	0.229462	0.011299	0.288136	0.545198	0.740113	0.99435	0.00565	0.180791	0.432203	0.757062	0.988701	0.002825	0.327684	0.522599	0.725989	1	0.615819	0.186441	0.19774	0.073654	0.045326	0	0.002825	0.158192	0.381356	0.793785	1	0.149718	0.426554	0.536723	0.677966	0.813559	0.262712	0.403955	0.632768	0.757062	0.963277	0.548023	0.322946	0.008475	0.206215	0.488701	0.748588	0.997175	0.440678
0.304348	0.347826	0.347826	0.208791	0.208791	0.21978	0.043478	0.326087	0.586957	0.771739	0.978261	0.021739	0.184783	0.423913	0.630435	1	0.01087	0.25	0.532609	0.728261	0.98913	0.347826	0.347826	0.304348	0.10989	0.043956	0	0.01087	0.130435	0.597826	0.804348	1	0.054348	0.369565	0.695652	0.891304	0.978261	0.152174	0.217391	0.434783	0.51087	0.586957	0.576087	0.307692	0.054348	0.206522	0.413043	0.597826	0.967391	0.369565
0.385542	0.289157	0.325301	0.231707	0.256098	0.146341	0.072289	0.313253	0.554217	0.759036	0.927711	0.060241	0.349398	0.638554	0.915663	1	0.012048	0.144578	0.277108	0.518072	0.843373	0.385542	0.313253	0.301205	0.121951	0.04878	0	0.012048	0.313253	0.481928	0.903614	1	0.024096	0.084337	0.240964	0.349398	0.506024	0.53012	0.590361	0.662651	0.771084	0.855422	0.349398	0.414634	0.024096	0.168675	0.385542	0.518072	0.915663	0.301205
0.349206	0.361905	0.288889	0.235669	0.210191	0.203822	0.015873	0.266667	0.438095	0.688889	0.996825	0.006349	0.250794	0.536508	0.771429	0.993651	0.003175	0.206349	0.51746	0.790476	1	0.555556	0.250794	0.193651	0.124204	0.066879	0.003185	0.003175	0.266667	0.479365	0.749206	1	0.038095	0.273016	0.539683	0.796825	0.996825	0.066667	0.215873	0.406349	0.593651	0.933333	0.549206	0.33121	0.019048	0.215873	0.514286	0.730159	0.990476	0.380952
0.445026	0.293194	0.26178	0.273684	0.210526	0.142105	0.015707	0.267016	0.575916	0.790576	0.994764	0.010471	0.246073	0.418848	0.696335	1	0.005236	0.183246	0.434555	0.680628	0.979058	0.387435	0.209424	0.403141	0.073684	0.084211	0.010526	0.005236	0.267016	0.659686	0.853403	1	0.020942	0.193717	0.293194	0.460733	0.884817	0.08377	0.361257	0.544503	0.643979	0.984293	0.387435	0.378947	0.020942	0.235602	0.397906	0.623037	0.979058	0.267016
0.27685	0.505967	0.217184	0.236842	0.145933	0.215311	0.00716	0.21957	0.424821	0.747017	0.99284	0.016706	0.362768	0.575179	0.782816	1	0.002387	0.150358	0.334129	0.630072	0.968974	0.653938	0.133652	0.212411	0.047847	0.066986	0	0.002387	0.393795	0.572792	0.792363	1	0.00716	0.090692	0.188544	0.272076	0.565632	0.0358	0.221957	0.377088	0.761337	0.995227	0.639618	0.315789	0.004773	0.315036	0.536993	0.718377	0.990453	0.465394
0.376721	0.352941	0.270338	0.243108	0.174185	0.197995	0.005006	0.176471	0.434293	0.71214	1	0.010013	0.28035	0.555695	0.773467	0.996245	0.001252	0.345432	0.530663	0.743429	0.998748	0.515645	0.117647	0.366708	0.04386	0.068922	0.006266	0.001252	0.188986	0.379224	0.692115	1	0.005006	0.390488	0.555695	0.710889	0.997497	0.015019	0.366708	0.624531	0.841051	0.992491	0.428035	0.333333	0.003755	0.360451	0.543179	0.763454	0.997497	0.387985
0.431138	0.341317	0.227545	0.204819	0.174699	0.156627	0.011976	0.305389	0.443114	0.634731	1	0.017964	0.179641	0.556886	0.742515	0.964072	0.005988	0.137725	0.60479	0.808383	0.994012	0.586826	0.137725	0.275449	0.036145	0.060241	0	0.005988	0.179641	0.365269	0.532934	1	0.101796	0.125749	0.874251	0.958084	0.994012	0.257485	0.580838	0.652695	0.754491	0.826347	0.413174	0.289157	0.023952	0.197605	0.628743	0.802395	0.988024	0.323353
0.323944	0.338028	0.338028	0.229682	0.240283	0.201413	0.007042	0.302817	0.517606	0.795775	1	0.010563	0.235915	0.478873	0.721831	0.992958	0.003521	0.221831	0.492958	0.732394	0.989437	0.366197	0.172535	0.461268	0.04947	0.106007	0	0.003521	0.211268	0.471831	0.711268	1	0.112676	0.271127	0.40493	0.609155	0.700704	0.014085	0.242958	0.507042	0.809859	0.978873	0.549296	0.402827	0.024648	0.232394	0.471831	0.672535	0.989437	0.369718
0.328467	0.364964	0.306569	0.338235	0.227941	0.191176	0.036496	0.226277	0.437956	0.70073	1	0.029197	0.218978	0.452555	0.722628	0.992701	0.007299	0.270073	0.540146	0.759124	0.970803	0.518248	0.226277	0.255474	0.102941	0.044118	0	0.007299	0.131387	0.452555	0.635036	1	0.065693	0.474453	0.686131	0.766423	0.985401	0.226277	0.328467	0.394161	0.839416	0.905109	0.489051	0.411765	0.065693	0.313869	0.489051	0.744526	0.970803	0.364964
0.296748	0.45935	0.243902	0.293878	0.142857	0.179592	0.012195	0.247967	0.487805	0.719512	1	0.00813	0.284553	0.54065	0.800813	0.98374	0.004065	0.207317	0.390244	0.642276	0.96748	0.646341	0.239837	0.113821	0.130612	0.065306	0	0.004065	0.284553	0.504065	0.800813	1	0.162602	0.231707	0.382114	0.569106	0.97561	0.02439	0.060976	0.707317	0.735772	0.926829	0.512195	0.302041	0.020325	0.243902	0.434959	0.646341	0.96748	0.430894
0.36747	0.337349	0.295181	0.2	0.254545	0.248485	0.024096	0.319277	0.560241	0.753012	1	0.012048	0.174699	0.421687	0.716867	0.987952	0.006024	0.222892	0.487952	0.73494	0.981928	0.427711	0.180723	0.391566	0.084848	0.084848	0	0.006024	0.150602	0.403614	0.620482	1	0.060241	0.096386	0.391566	0.445783	0.975904	0.180723	0.319277	0.674699	0.789157	0.945783	0.415663	0.472727	0.03012	0.253012	0.475904	0.740964	0.981928	0.39759
0.341463	0.382114	0.276423	0.278689	0.196721	0.245902	0.01626	0.195122	0.504065	0.699187	0.99187	0.02439	0.211382	0.479675	0.731707	0.97561	0.00813	0.276423	0.487805	0.756098	1	0.349593	0.219512	0.430894	0.081967	0.065574	0	0.00813	0.211382	0.414634	0.756098	1	0.252033	0.292683	0.373984	0.463415	0.853659	0.065041	0.162602	0.609756	0.715447	0.95935	0.447154	0.278689	0.121951	0.300813	0.471545	0.788618	0.98374	0.382114
0.477477	0.189189	0.333333	0.2	0.327273	0.127273	0.018018	0.279279	0.54955	0.783784	0.981982	0.027027	0.18018	0.333333	0.45045	0.972973	0.009009	0.252252	0.504505	0.711712	1	0.315315	0.198198	0.486486	0.072727	0.109091	0	0.009009	0.207207	0.387387	0.657658	1	0.162162	0.225225	0.279279	0.675676	0.72973	0.054054	0.414414	0.558559	0.810811	0.963964	0.477477	0.381818	0.036036	0.342342	0.495495	0.702703	0.972973	0.18018
0.416382	0.262799	0.320819	0.19863	0.256849	0.164384	0.006826	0.317406	0.556314	0.761092	1	0.020478	0.191126	0.392491	0.648464	0.90785	0.003413	0.245734	0.491468	0.764505	0.993174	0.37884	0.228669	0.392491	0.075342	0.068493	0	0.003413	0.197952	0.477816	0.62116	1	0.013652	0.163823	0.395904	0.767918	0.945392	0.054608	0.34471	0.549488	0.825939	0.993174	0.559727	0.349315	0.013652	0.232082	0.464164	0.709898	0.993174	0.286689
0.4	0.266667	0.333333	0.201681	0.252101	0.210084	0.016667	0.216667	0.516667	0.775	0.991667	0.041667	0.325	0.5	0.75	1	0.008333	0.175	0.408333	0.716667	0.916667	0.383333	0.166667	0.45	0.042017	0.092437	0.008403	0.008333	0.116667	0.341667	0.683333	1	0.266667	0.3	0.4	0.708333	0.75	0.075	0.45	0.591667	0.85	0.966667	0.441667	0.352941	0.05	0.366667	0.525	0.716667	0.95	0.166667
0.389831	0.313559	0.29661	0.247863	0.222222	0.179487	0.025424	0.237288	0.644068	0.822034	1	0.016949	0.279661	0.423729	0.652542	0.957627	0.008475	0.20339	0.415254	0.601695	0.983051	0.584746	0.186441	0.228814	0.08547	0.08547	0	0.008475	0.29661	0.610169	0.754237	1	0.254237	0.288136	0.432203	0.5	0.830508	0.101695	0.144068	0.20339	0.872881	0.974576	0.474576	0.273504	0.033898	0.279661	0.40678	0.59322	0.983051	0.279661
0.308989	0.382022	0.308989	0.259887	0.20904	0.259887	0.016854	0.235955	0.494382	0.831461	1	0.011236	0.314607	0.52809	0.719101	0.983146	0.005618	0.202247	0.426966	0.646067	0.966292	0.421348	0.38764	0.191011	0.158192	0.022599	0	0.005618	0.207865	0.573034	0.865169	1	0.050562	0.191011	0.488764	0.651685	0.97191	0.331461	0.370787	0.421348	0.792135	0.842697	0.438202	0.497175	0.022472	0.292135	0.477528	0.651685	0.955056	0.337079
0.34433	0.352577	0.303093	0.208462	0.186791	0.21259	0.003093	0.201031	0.406186	0.689691	1	0.002062	0.282474	0.560825	0.8	0.998969	0.001031	0.286598	0.534021	0.742268	0.995876	0.454639	0.110309	0.435052	0.047472	0.078431	0.002064	0.001031	0.274227	0.593814	0.856701	1	0.006186	0.378351	0.679381	0.802062	0.968041	0.021649	0.181443	0.434021	0.584536	0.992784	0.501031	0.373581	0.008247	0.353608	0.571134	0.775258	0.98866	0.372165
0.267857	0.487013	0.24513	0.214634	0.120325	0.253659	0.00487	0.224026	0.449675	0.775974	0.993506	0.003247	0.267857	0.540584	0.727273	0.996753	0.001623	0.23539	0.465909	0.709416	1	0.714286	0.097403	0.188312	0.053659	0.043902	0.001626	0.001623	0.279221	0.599026	0.805195	1	0.012987	0.238636	0.363636	0.456169	0.965909	0.035714	0.206169	0.308442	0.491883	0.988636	0.452922	0.360976	0.01461	0.232143	0.464286	0.668831	0.998377	0.48539
0.362416	0.310962	0.326622	0.186099	0.266816	0.174888	0.006711	0.243848	0.501119	0.776286	0.995526	0.017897	0.252796	0.498881	0.684564	1	0.002237	0.223714	0.487696	0.753915	0.997763	0.348993	0.087248	0.563758	0.033632	0.100897	0.002242	0.002237	0.241611	0.527964	0.769575	1	0.217002	0.288591	0.47651	0.543624	0.628635	0.004474	0.181208	0.510067	0.771812	0.986577	0.530201	0.390135	0.011186	0.266219	0.49217	0.680089	0.988814	0.326622
0.316327	0.459184	0.22449	0.267894	0.161554	0.198364	0.006122	0.312245	0.559184	0.730612	0.985714	0.004082	0.202041	0.391837	0.757143	0.997959	0.002041	0.285714	0.546939	0.744898	1	0.706122	0.114286	0.179592	0.047035	0.063395	0.002045	0.002041	0.216327	0.426531	0.787755	1	0.016327	0.318367	0.497959	0.702041	0.785714	0.057143	0.444898	0.616327	0.734694	0.938776	0.440816	0.368098	0.010204	0.255102	0.502041	0.734694	0.993878	0.453061
0.286371	0.502297	0.211332	0.216258	0.130368	0.187117	0.009188	0.165391	0.349158	0.575804	0.996937	0.003063	0.385911	0.601838	0.784074	1	0.001531	0.229709	0.41807	0.727412	0.993874	0.75804	0.056662	0.185299	0.027607	0.030675	0.003067	0.001531	0.304747	0.578867	0.784074	1	0.047473	0.211332	0.266462	0.316998	0.709035	0.070444	0.160796	0.333844	0.477795	0.911179	0.431853	0.328221	0.01072	0.267994	0.520674	0.686064	0.993874	0.513017
0.359667	0.334719	0.305613	0.227083	0.235417	0.216667	0.02079	0.243243	0.471933	0.742204	0.989605	0.004158	0.266112	0.588358	0.844075	1	0.002079	0.234927	0.449064	0.650728	0.991684	0.403326	0.367983	0.22869	0.095833	0.058333	0.020833	0.002079	0.22869	0.50104	0.735967	1	0.02079	0.261954	0.463617	0.663202	0.898129	0.039501	0.245322	0.596674	0.900208	0.991684	0.440748	0.4	0.006237	0.27027	0.474012	0.677755	0.991684	0.367983
0.366133	0.313501	0.320366	0.227064	0.263761	0.188073	0.006865	0.240275	0.498856	0.759725	0.990847	0.009153	0.228833	0.487414	0.734554	1	0.002288	0.267735	0.496568	0.73913	0.995423	0.402746	0.189931	0.407323	0.073394	0.082569	0.004587	0.002288	0.295195	0.517162	0.773455	1	0.100686	0.249428	0.489703	0.743707	0.935927	0.009153	0.196796	0.439359	0.681922	0.981693	0.544622	0.417431	0.009153	0.265446	0.487414	0.702517	0.995423	0.340961
0.388235	0.329412	0.282353	0.25	0.214286	0.178571	0.070588	0.223529	0.517647	0.658824	1	0.058824	0.341176	0.623529	0.835294	0.988235	0.011765	0.152941	0.352941	0.6	0.894118	0.317647	0.305882	0.376471	0.119048	0.047619	0	0.011765	0.188235	0.435294	0.917647	1	0.023529	0.082353	0.235294	0.341176	0.494118	0.517647	0.6	0.694118	0.811765	0.905882	0.388235	0.47619	0.023529	0.211765	0.4	0.564706	0.929412	0.4
0.352554	0.31631	0.331137	0.19637	0.239274	0.219472	0.003295	0.265239	0.518946	0.818781	0.998353	0.016474	0.243822	0.500824	0.708402	0.99341	0.001647	0.230643	0.469522	0.705107	1	0.490939	0.169687	0.339374	0.061056	0.064356	0.00495	0.001647	0.248764	0.52883	0.759473	1	0.031301	0.23888	0.444811	0.546952	0.869852	0.008237	0.261944	0.589786	0.820428	0.996705	0.439868	0.333333	0.011532	0.217463	0.500824	0.688633	0.995058	0.350906
0.289662	0.450358	0.25998	0.242828	0.148566	0.240779	0.004094	0.185261	0.455476	0.763562	0.998976	0.002047	0.27738	0.524053	0.74002	0.997953	0.001024	0.254862	0.451382	0.743091	1	0.576254	0.107472	0.316274	0.04918	0.071721	0.004098	0.001024	0.323439	0.576254	0.787103	1	0.037871	0.174002	0.30911	0.433982	0.995906	0.047083	0.209826	0.418628	0.735926	0.993859	0.426817	0.432377	0.012282	0.283521	0.510747	0.77175	0.995906	0.456499
0.512448	0.298755	0.188797	0.288981	0.178794	0.118503	0.010373	0.205394	0.441909	0.757261	1	0.004149	0.381743	0.607884	0.827801	0.997925	0.002075	0.288382	0.489627	0.624481	0.987552	0.510373	0.074689	0.414938	0.029106	0.04158	0.004158	0.002075	0.404564	0.672199	0.838174	1	0.3361	0.419087	0.560166	0.622407	0.989627	0.03112	0.145228	0.248963	0.512448	0.941909	0.284232	0.29106	0.018672	0.36722	0.506224	0.636929	0.991701	0.311203
0.413534	0.270677	0.315789	0.242424	0.212121	0.128788	0.030075	0.240602	0.556391	0.796992	0.992481	0.022556	0.225564	0.413534	0.578947	1	0.007519	0.255639	0.503759	0.699248	0.984962	0.270677	0.360902	0.368421	0.045455	0.075758	0.015152	0.007519	0.120301	0.330827	0.609023	1	0.150376	0.669173	0.759398	0.864662	0.954887	0.052632	0.263158	0.383459	0.518797	0.977444	0.406015	0.424242	0.150376	0.300752	0.511278	0.699248	0.93985	0.300752
0.341463	0.341463	0.317073	0.273469	0.195918	0.208163	0.00813	0.215447	0.443089	0.756098	1	0.01626	0.308943	0.528455	0.760163	0.98374	0.004065	0.235772	0.49187	0.719512	0.995935	0.390244	0.012195	0.597561	0.004082	0.142857	0.012245	0.004065	0.378049	0.544715	0.739837	1	0.414634	0.414634	0.414634	0.418699	0.49187	0.012195	0.178862	0.434959	0.752033	0.99187	0.54878	0.408163	0.01626	0.252033	0.50813	0.703252	0.98374	0.353659
0.402597	0.320346	0.277056	0.273913	0.230435	0.182609	0.008658	0.199134	0.47619	0.722944	0.995671	0.030303	0.285714	0.575758	0.796537	1	0.004329	0.255411	0.428571	0.636364	0.991342	0.354978	0.095238	0.549784	0.034783	0.086957	0	0.004329	0.181818	0.471861	0.714286	1	0.450216	0.792208	0.844156	0.865801	0.900433	0.030303	0.246753	0.419913	0.658009	0.991342	0.506494	0.365217	0.034632	0.251082	0.454545	0.65368	0.991342	0.320346
0.391555	0.301344	0.307102	0.230769	0.215385	0.198077	0.003839	0.337812	0.59309	0.823417	0.998081	0.011516	0.190019	0.433781	0.68714	1	0.001919	0.209213	0.426104	0.644914	0.990403	0.428023	0.143954	0.428023	0.046154	0.088462	0.007692	0.001919	0.241843	0.602687	0.873321	1	0.090211	0.289827	0.428023	0.587332	0.681382	0.017274	0.230326	0.466411	0.740883	0.988484	0.474088	0.319231	0.011516	0.1881	0.380038	0.600768	0.934741	0.347409
0.31441	0.366812	0.318777	0.236842	0.22807	0.232456	0.0131	0.257642	0.49345	0.733624	0.995633	0.004367	0.209607	0.406114	0.71179	0.982533	0.034934	0.28821	0.576419	0.772926	1	0.349345	0.017467	0.633188	0.008772	0.078947	0	0.004367	0.087336	0.454148	0.855895	1	0.41048	0.41048	0.414847	0.419214	0.423581	0.091703	0.28821	0.532751	0.703057	0.991266	0.49345	0.473684	0.017467	0.222707	0.471616	0.694323	0.9869	0.406114
0.404632	0.257493	0.337875	0.204638	0.270123	0.169168	0.002725	0.27248	0.543597	0.769755	0.99455	0.010899	0.192098	0.440054	0.69346	0.997275	0.001362	0.257493	0.50545	0.735695	1	0.43188	0.179837	0.388283	0.087312	0.065484	0.002729	0.001362	0.280654	0.549046	0.803815	1	0.00545	0.179837	0.450954	0.867847	0.998638	0.027248	0.26158	0.483651	0.610354	0.948229	0.536785	0.392906	0.006812	0.265668	0.480926	0.711172	0.995913	0.280654
0.323353	0.402695	0.273952	0.22039	0.176912	0.235382	0.004491	0.278443	0.476048	0.760479	1	0.010479	0.229042	0.552395	0.751497	0.998503	0.001497	0.238024	0.477545	0.717066	0.994012	0.571856	0.151198	0.276946	0.056972	0.05997	0	0.001497	0.212575	0.525449	0.738024	1	0.068862	0.200599	0.33982	0.447605	0.601796	0.086826	0.363772	0.609281	0.911677	0.992515	0.519461	0.311844	0.005988	0.308383	0.618263	0.763473	0.994012	0.404192
0.402174	0.358696	0.23913	0.373626	0.186813	0.175824	0.054348	0.25	0.5	0.76087	1	0.021739	0.23913	0.521739	0.728261	0.98913	0.01087	0.141304	0.413043	0.597826	0.934783	0.315217	0.271739	0.413043	0.087912	0.10989	0.021978	0.01087	0.456522	0.673913	0.75	1	0.065217	0.130435	0.76087	0.826087	0.945652	0.032609	0.25	0.358696	0.5	0.978261	0.347826	0.43956	0.065217	0.326087	0.532609	0.695652	0.956522	0.391304
0.452632	0.178947	0.368421	0.180851	0.319149	0.095745	0.021053	0.221053	0.442105	0.736842	1	0.042105	0.168421	0.463158	0.610526	0.863158	0.010526	0.231579	0.505263	0.789474	0.957895	0.305263	0.326316	0.368421	0.085106	0.06383	0.021277	0.010526	0.147368	0.452632	0.6	1	0.042105	0.105263	0.505263	0.652632	0.968421	0.168421	0.242105	0.336842	0.8	0.926316	0.484211	0.425532	0.042105	0.231579	0.515789	0.705263	0.957895	0.2
0.339286	0.428571	0.232143	0.254545	0.218182	0.236364	0.053571	0.214286	0.375	0.785714	0.982143	0.035714	0.160714	0.464286	0.714286	1	0.017857	0.339286	0.482143	0.660714	0.964286	0.714286	0.160714	0.125	0.109091	0.072727	0	0.017857	0.25	0.553571	0.767857	1	0.285714	0.303571	0.446429	0.482143	0.607143	0.089286	0.089286	0.125	0.875	0.910714	0.25	0.472727	0.267857	0.339286	0.517857	0.696429	0.964286	0.446429
0.336879	0.347518	0.315603	0.216696	0.218472	0.220249	0.003546	0.264184	0.535461	0.785461	1	0.005319	0.216312	0.475177	0.760638	0.998227	0.001773	0.248227	0.468085	0.705674	0.992908	0.400709	0.078014	0.521277	0.033748	0.104796	0.001776	0.001773	0.175532	0.475177	0.771277	1	0.005319	0.322695	0.466312	0.567376	0.636525	0.039007	0.260638	0.530142	0.753546	0.968085	0.498227	0.408526	0.007092	0.312057	0.501773	0.671986	0.992908	0.393617
0.330769	0.315385	0.353846	0.213368	0.249357	0.241645	0.005128	0.215385	0.446154	0.720513	0.994872	0.007692	0.325641	0.541026	0.766667	1	0.002564	0.217949	0.464103	0.725641	0.997436	0.34359	0.238462	0.417949	0.087404	0.066838	0	0.002564	0.284615	0.474359	0.794872	1	0.007692	0.189744	0.384615	0.528205	0.997436	0.048718	0.248718	0.584615	0.761538	0.974359	0.602564	0.416452	0.010256	0.269231	0.492308	0.730769	0.992308	0.312821
0.332103	0.306273	0.361624	0.185185	0.244444	0.240741	0.01845	0.258303	0.479705	0.774908	0.99631	0.01476	0.228782	0.546125	0.719557	1	0.00369	0.217712	0.461255	0.715867	0.99262	0.350554	0.177122	0.472325	0.051852	0.088889	0	0.00369	0.151292	0.383764	0.634686	1	0.121771	0.295203	0.369004	0.568266	0.660517	0.01845	0.258303	0.704797	0.826568	0.99262	0.542435	0.407407	0.01476	0.217712	0.461255	0.649446	0.98893	0.335793
0.35206	0.460674	0.187266	0.409774	0.120301	0.139098	0.007491	0.325843	0.550562	0.741573	1	0.011236	0.254682	0.565543	0.794007	0.985019	0.003745	0.116105	0.292135	0.426966	0.996255	0.745318	0.108614	0.146067	0.045113	0.022556	0	0.003745	0.430712	0.625468	0.812734	1	0.153558	0.250936	0.29588	0.389513	0.509363	0.033708	0.06367	0.101124	0.23221	0.355805	0.284644	0.195489	0.033708	0.101124	0.247191	0.404494	0.94382	0.464419
0.383562	0.369863	0.246575	0.275862	0.186207	0.165517	0.020548	0.315068	0.60274	0.842466	1	0.013699	0.19863	0.458904	0.650685	0.979452	0.006849	0.191781	0.452055	0.69863	0.972603	0.5	0.150685	0.349315	0.075862	0.048276	0.02069	0.006849	0.30137	0.438356	0.630137	1	0.191781	0.445205	0.547945	0.657534	0.979452	0.075342	0.171233	0.678082	0.767123	0.856164	0.363014	0.386207	0.034247	0.19863	0.431507	0.657534	0.910959	0.376712
0.358696	0.434783	0.206522	0.384615	0.142857	0.197802	0.032609	0.163043	0.358696	0.652174	0.956522	0.021739	0.25	0.521739	0.73913	1	0.01087	0.336957	0.554348	0.782609	0.934783	0.163043	0	0.836957	0	0.065934	0	0.01087	0.032609	0.467391	0.728261	1	0	0	0	0	0	0.054348	0.25	0.48913	0.771739	0.98913	0.282609	0.417582	0.076087	0.304348	0.543478	0.673913	0.945652	0.423913
0.429091	0.436364	0.134545	0.416058	0.120438	0.124088	0.010909	0.298182	0.563636	0.792727	1	0.007273	0.276364	0.487273	0.723636	0.996364	0.003636	0.109091	0.243636	0.632727	0.938182	0.810909	0.098182	0.090909	0.036496	0.029197	0	0.003636	0.367273	0.570909	0.781818	1	0.029091	0.12	0.145455	0.28	0.938182	0.072727	0.090909	0.210909	0.232727	0.807273	0.258182	0.335766	0.029091	0.145455	0.294545	0.512727	0.949091	0.443636
0.346405	0.366013	0.287582	0.243421	0.203947	0.236842	0.026144	0.313725	0.464052	0.751634	0.980392	0.013072	0.222222	0.477124	0.718954	1	0.006536	0.215686	0.535948	0.777778	0.973856	0.359477	0.30719	0.333333	0.125	0.046053	0.006579	0.006536	0.117647	0.503268	0.751634	1	0.026144	0.248366	0.614379	0.888889	0.986928	0.176471	0.326797	0.411765	0.647059	0.830065	0.392157	0.486842	0.03268	0.215686	0.535948	0.745098	0.973856	0.379085
0.316327	0.346939	0.336735	0.220513	0.25641	0.261538	0.010204	0.209184	0.479592	0.688776	1	0.015306	0.229592	0.52551	0.80102	0.994898	0.005102	0.285714	0.484694	0.714286	0.933673	0.413265	0.469388	0.117347	0.123077	0.041026	0	0.005102	0.30102	0.591837	0.831633	1	0.015306	0.321429	0.489796	0.673469	0.928571	0.112245	0.132653	0.265306	0.295918	0.979592	0.44898	0.492308	0.020408	0.270408	0.479592	0.719388	0.933673	0.331633
0.338816	0.388158	0.273026	0.343234	0.171617	0.191419	0.013158	0.190789	0.427632	0.75	0.993421	0.006579	0.325658	0.572368	0.805921	0.996711	0.003289	0.213816	0.4375	0.684211	1	0.641447	0.296053	0.0625	0.132013	0.039604	0	0.003289	0.240132	0.539474	0.802632	1	0.009868	0.266447	0.398026	0.628289	0.980263	0.069079	0.078947	0.161184	0.819079	0.842105	0.506579	0.330033	0.009868	0.328947	0.532895	0.710526	0.973684	0.358553
0.398058	0.330097	0.271845	0.235294	0.176471	0.196078	0.029126	0.145631	0.330097	0.592233	0.970874	0.019417	0.359223	0.582524	0.796117	0.990291	0.009709	0.262136	0.514563	0.825243	1	0.368932	0.029126	0.601942	0.019608	0.098039	0	0.009709	0.378641	0.631068	0.776699	1	0.951456	0.951456	0.951456	0.961165	0.970874	0.029126	0.165049	0.38835	0.61165	0.883495	0.368932	0.411765	0.126214	0.300971	0.640777	0.796117	0.951456	0.300971
0.334247	0.386301	0.279452	0.255144	0.183813	0.1893	0.00274	0.228767	0.482192	0.715068	0.99589	0.00411	0.319178	0.636986	0.857534	0.99863	0.00137	0.216438	0.4	0.587671	1	0.49589	0.050685	0.453425	0.032922	0.093278	0.002743	0.00137	0.445205	0.683562	0.871233	1	0.009589	0.646575	0.676712	0.741096	0.889041	0.020548	0.191781	0.334247	0.478082	0.856164	0.491781	0.386831	0.005479	0.224658	0.471233	0.79589	0.99726	0.442466
0.254777	0.503185	0.242038	0.24359	0.115385	0.237179	0.095541	0.522293	0.687898	0.859873	0.993631	0.012739	0.203822	0.426752	0.707006	1	0.006369	0.178344	0.407643	0.605096	0.929936	0.66879	0.165605	0.165605	0.083333	0.057692	0.00641	0.006369	0.248408	0.426752	0.694268	1	0.044586	0.165605	0.229299	0.496815	0.917197	0.363057	0.66879	0.751592	0.840764	0.88535	0.426752	0.320513	0.025478	0.216561	0.44586	0.624204	0.929936	0.528662
0.460526	0.263158	0.276316	0.238411	0.298013	0.15894	0.013158	0.25	0.480263	0.703947	1	0.072368	0.263158	0.539474	0.717105	0.993421	0.006579	0.190789	0.532895	0.782895	0.967105	0.348684	0.309211	0.342105	0.125828	0.059603	0.006623	0.006579	0.144737	0.559211	0.75	1	0.013158	0.236842	0.605263	0.875	0.973684	0.059211	0.315789	0.401316	0.638158	0.822368	0.401316	0.476821	0.019737	0.203947	0.513158	0.723684	0.967105	0.25
0.347619	0.457143	0.195238	0.296651	0.177033	0.162679	0.014286	0.271429	0.485714	0.709524	1	0.009524	0.190476	0.42381	0.704762	0.985714	0.004762	0.409524	0.671429	0.828571	0.990476	0.542857	0.128571	0.328571	0.057416	0.095694	0.009569	0.004762	0.304762	0.471429	0.619048	1	0.219048	0.671429	0.833333	0.880952	0.995238	0.038095	0.114286	0.271429	0.757143	0.966667	0.342857	0.392344	0.090476	0.404762	0.580952	0.771429	0.990476	0.461905
0.357013	0.417122	0.225865	0.279197	0.156934	0.184307	0.007286	0.313297	0.546448	0.757741	1	0.005464	0.205829	0.477231	0.695811	0.992714	0.001821	0.233151	0.45173	0.797814	0.998179	0.71949	0.061931	0.218579	0.043796	0.069343	0.007299	0.001821	0.198543	0.48816	0.708561	1	0.116576	0.227687	0.318761	0.68306	0.994536	0.005464	0.418944	0.557377	0.899818	0.969035	0.433515	0.39781	0.010929	0.213115	0.473588	0.766849	0.994536	0.420765
0.270833	0.388889	0.340278	0.230769	0.132867	0.258741	0.020833	0.256944	0.534722	0.666667	0.958333	0.013889	0.215278	0.416667	0.791667	0.979167	0.006944	0.263889	0.465278	0.743056	1	0.583333	0.368056	0.048611	0.195804	0.027972	0	0.006944	0.166667	0.4375	0.777778	1	0.111111	0.277778	0.472222	0.638889	0.993056	0.881944	0.881944	0.895833	0.9375	0.951389	0.527778	0.321678	0.111111	0.284722	0.555556	0.75	0.972222	0.375
0.411215	0.299065	0.28972	0.320755	0.283019	0.150943	0.046729	0.280374	0.514019	0.738318	0.981308	0.018692	0.233645	0.429907	0.728972	0.953271	0.009346	0.205607	0.504673	0.757009	1	0.504673	0.252336	0.242991	0.113208	0.056604	0	0.009346	0.121495	0.439252	0.794393	1	0.373832	0.420561	0.663551	0.859813	0.971963	0.168224	0.271028	0.336449	0.514019	0.579439	0.364486	0.415094	0.037383	0.242991	0.420561	0.654206	0.971963	0.280374
0.326797	0.385621	0.287582	0.263158	0.243421	0.210526	0.019608	0.27451	0.490196	0.75817	1	0.013072	0.267974	0.48366	0.712418	0.993464	0.006536	0.143791	0.509804	0.797386	0.980392	0.346405	0.313725	0.339869	0.125	0.059211	0.006579	0.006536	0.150327	0.503268	0.75817	1	0.019608	0.248366	0.614379	0.888889	0.986928	0.058824	0.320261	0.405229	0.653595	0.836601	0.405229	0.486842	0.013072	0.202614	0.522876	0.738562	0.980392	0.392157
0.302817	0.341549	0.355634	0.201413	0.215548	0.275618	0.017606	0.285211	0.507042	0.778169	0.996479	0.007042	0.228873	0.475352	0.711268	1	0.003521	0.232394	0.485915	0.725352	0.992958	0.415493	0.151408	0.433099	0.042403	0.091873	0	0.003521	0.179577	0.419014	0.690141	1	0.193662	0.285211	0.605634	0.644366	0.728873	0.045775	0.253521	0.528169	0.830986	0.992958	0.556338	0.424028	0.010563	0.235915	0.475352	0.679577	0.985915	0.352113
0.316667	0.45	0.233333	0.271186	0.135593	0.237288	0.05	0.166667	0.316667	0.65	0.933333	0.033333	0.2	0.45	0.716667	0.983333	0.016667	0.3	0.6	0.766667	1	0.7	0.116667	0.183333	0.101695	0.067797	0	0.016667	0.166667	0.55	0.716667	1	0.533333	0.533333	0.75	0.95	0.983333	0.216667	0.233333	0.3	0.35	0.4	0.283333	0.474576	0.1	0.416667	0.6	0.766667	0.966667	0.416667
0.35	0.353846	0.296154	0.27027	0.204633	0.200772	0.011538	0.296154	0.511538	0.788462	1	0.007692	0.153846	0.426923	0.730769	0.980769	0.003846	0.292308	0.492308	0.734615	0.984615	0.5	0.361538	0.138462	0.138996	0.03861	0	0.003846	0.157692	0.534615	0.753846	1	0.115385	0.430769	0.584615	0.811538	0.980769	0.034615	0.165385	0.203846	0.246154	0.469231	0.5	0.393822	0.015385	0.265385	0.523077	0.765385	0.984615	0.361538
0.384236	0.197044	0.418719	0.108911	0.341584	0.188119	0.014778	0.275862	0.541872	0.719212	1	0.009852	0.157635	0.55665	0.827586	0.940887	0.004926	0.236453	0.438424	0.694581	0.970443	0.359606	0.246305	0.394089	0.089109	0.059406	0.009901	0.004926	0.128079	0.472906	0.82266	1	0.049261	0.275862	0.384236	0.729064	0.970443	0.133005	0.226601	0.55665	0.655172	0.8867	0.551724	0.475248	0.024631	0.256158	0.517241	0.753695	0.970443	0.167488
0.331974	0.404568	0.263458	0.277551	0.179592	0.205714	0.001631	0.254486	0.47553	0.755302	0.995106	0.002447	0.22186	0.486134	0.722675	0.999184	0.000816	0.269168	0.552202	0.778956	1	0.603589	0.141109	0.255302	0.068571	0.047347	0.001633	0.000816	0.21615	0.447798	0.704731	1	0.006525	0.365416	0.618271	0.78385	0.996737	0.030995	0.261827	0.550571	0.757749	0.99429	0.453507	0.370612	0.004894	0.271615	0.594617	0.80832	0.998369	0.412724
0.41875	0.34375	0.2375	0.238994	0.220126	0.138365	0.05	0.25625	0.4875	0.75625	1	0.0125	0.225	0.63125	0.85625	0.98125	0.00625	0.15625	0.39375	0.56875	0.7625	0.69375	0.0875	0.21875	0.081761	0.069182	0.006289	0.00625	0.24375	0.50625	0.825	1	0.15	0.1625	0.43125	0.55625	0.625	0.10625	0.19375	0.3875	0.7	0.75625	0.3375	0.339623	0.025	0.18125	0.4125	0.58125	0.90625	0.34375
0.377939	0.298373	0.323689	0.21558	0.23913	0.20471	0.003617	0.218807	0.504521	0.768535	1	0.009042	0.253165	0.495479	0.748644	0.996383	0.001808	0.25859	0.479204	0.721519	0.998192	0.491863	0.133816	0.374322	0.059783	0.077899	0.001812	0.001808	0.218807	0.396022	0.696203	1	0.018083	0.40868	0.459313	0.576854	0.998192	0.065099	0.251356	0.638336	0.820976	0.981917	0.468354	0.384058	0.019892	0.282098	0.497288	0.725136	0.998192	0.334539
0.33617	0.344681	0.319149	0.226496	0.200855	0.213675	0.012766	0.229787	0.455319	0.680851	0.987234	0.021277	0.246809	0.570213	0.774468	1	0.004255	0.255319	0.489362	0.719149	0.995745	0.485106	0.361702	0.153191	0.136752	0.034188	0	0.004255	0.225532	0.578723	0.782979	1	0.093617	0.412766	0.570213	0.757447	0.970213	0.017021	0.157447	0.195745	0.242553	0.480851	0.544681	0.384615	0.017021	0.289362	0.523404	0.761702	0.995745	0.353191
0.441441	0.252252	0.306306	0.263636	0.290909	0.172727	0.018018	0.288288	0.531532	0.756757	1	0.045045	0.189189	0.378378	0.702703	0.927928	0.009009	0.234234	0.495495	0.72973	0.972973	0.432432	0.297297	0.27027	0.118182	0.063636	0.009091	0.009009	0.27027	0.630631	0.774775	1	0.036036	0.333333	0.603604	0.801802	0.963964	0.081081	0.135135	0.261261	0.45045	0.927928	0.396396	0.418182	0.036036	0.189189	0.45045	0.783784	0.972973	0.288288
0.330544	0.401674	0.267782	0.268908	0.205882	0.193277	0.012552	0.225941	0.506276	0.769874	1	0.008368	0.242678	0.543933	0.757322	0.995816	0.004184	0.251046	0.430962	0.623431	0.970711	0.322176	0.09205	0.585774	0.042017	0.109244	0	0.004184	0.175732	0.472803	0.790795	1	0.435146	0.76569	0.824268	0.853556	0.979079	0.029289	0.242678	0.447699	0.610879	0.953975	0.485356	0.352941	0.050209	0.242678	0.439331	0.65272	0.970711	0.426778
0.379705	0.333879	0.286416	0.211475	0.213115	0.185246	0.00982	0.247136	0.479542	0.728314	1	0.003273	0.237316	0.513912	0.782324	0.99509	0.001637	0.256956	0.500818	0.736498	0.996727	0.481178	0.212766	0.306056	0.091803	0.068852	0.003279	0.001637	0.212766	0.479542	0.746318	1	0.006547	0.201309	0.404255	0.649755	0.944354	0.070376	0.376432	0.585925	0.833061	0.991817	0.443535	0.337705	0.006547	0.268412	0.543372	0.762684	0.996727	0.322422
0.332226	0.421927	0.245847	0.32	0.163333	0.16	0.006645	0.23588	0.511628	0.76412	1	0.013289	0.245847	0.465116	0.770764	0.996678	0.003322	0.225914	0.518272	0.657807	0.966777	0.581395	0.106312	0.312292	0.06	0.073333	0	0.003322	0.245847	0.501661	0.777409	1	0.016611	0.053156	0.418605	0.528239	0.657807	0.079734	0.365449	0.554817	0.717608	0.990033	0.495017	0.326667	0.016611	0.285714	0.498339	0.757475	0.966777	0.458472
0.408318	0.302457	0.289225	0.227273	0.236742	0.185606	0.020794	0.238185	0.470699	0.73724	1	0.003781	0.293006	0.514178	0.776938	0.994329	0.00189	0.234405	0.512287	0.73535	0.996219	0.190926	0.069943	0.73913	0.022727	0.05303	0.003788	0.00189	0.480151	0.714556	0.829868	1	0.410208	0.470699	0.886578	0.969754	0.988658	0.009452	0.190926	0.379962	0.671078	0.952741	0.47259	0.401515	0.007561	0.383743	0.597353	0.780718	0.984877	0.293006
0.277834	0.38014	0.342026	0.210843	0.199799	0.279116	0.003009	0.254764	0.481444	0.747242	1	0.002006	0.278837	0.508526	0.74323	0.996991	0.001003	0.219659	0.494483	0.750251	0.998997	0.468405	0.27984	0.251755	0.101406	0.057229	0.01506	0.001003	0.332999	0.558676	0.789368	1	0.004012	0.344032	0.5667	0.764293	0.976931	0.007021	0.078235	0.203611	0.553661	0.93681	0.61986	0.343373	0.004012	0.251755	0.52658	0.762287	0.998997	0.394183
0.369628	0.332378	0.297994	0.272989	0.264368	0.181034	0.005731	0.237822	0.472779	0.713467	1	0.011461	0.17765	0.484241	0.767908	0.991404	0.002865	0.332378	0.535817	0.744986	0.994269	0.541547	0.151862	0.30659	0.048851	0.077586	0.002874	0.002865	0.209169	0.424069	0.773639	1	0.191977	0.369628	0.441261	0.489971	0.908309	0.037249	0.234957	0.60745	0.796562	0.919771	0.484241	0.362069	0.031519	0.289398	0.512894	0.73639	0.985673	0.363897
0.427711	0.355422	0.216867	0.260606	0.169697	0.163636	0.03012	0.319277	0.572289	0.777108	1	0.012048	0.210843	0.493976	0.807229	0.993976	0.006024	0.174699	0.36747	0.536145	0.879518	0.554217	0.174699	0.271084	0.060606	0.060606	0.012121	0.006024	0.343373	0.722892	0.861446	1	0.024096	0.060241	0.295181	0.373494	0.554217	0.096386	0.156627	0.433735	0.518072	0.710843	0.445783	0.387879	0.024096	0.222892	0.433735	0.753012	0.975904	0.39759
0.363014	0.363014	0.273973	0.255172	0.248276	0.186207	0.013699	0.321918	0.445205	0.739726	1	0.054795	0.246575	0.5	0.678082	0.986301	0.006849	0.191781	0.520548	0.767123	0.972603	0.335616	0.328767	0.335616	0.131034	0.048276	0.006897	0.006849	0.150685	0.561644	0.746575	1	0.013699	0.19863	0.60274	0.883562	0.986301	0.164384	0.321918	0.40411	0.486301	0.821918	0.39726	0.482759	0.020548	0.19863	0.534247	0.732877	0.972603	0.369863
0.360444	0.391867	0.247689	0.261111	0.164815	0.216667	0.018484	0.232902	0.513863	0.735675	0.998152	0.003697	0.292052	0.504621	0.772643	0.994455	0.001848	0.195933	0.438078	0.720887	1	0.735675	0.110906	0.15342	0.064815	0.05	0.001852	0.001848	0.266174	0.48244	0.744917	1	0.005545	0.19963	0.608133	0.669131	0.863216	0.018484	0.12939	0.550832	0.946396	0.990758	0.380776	0.396296	0.007394	0.25878	0.55268	0.783734	0.992606	0.414048
0.3509	0.312339	0.336761	0.20592	0.243243	0.221364	0.006427	0.258355	0.51671	0.760925	1	0.005141	0.235219	0.48329	0.736504	0.997429	0.001285	0.22108	0.488432	0.733933	0.998715	0.471722	0.22365	0.304627	0.095238	0.059202	0.005148	0.001285	0.24036	0.456298	0.74036	1	0.041131	0.152956	0.494859	0.818766	0.998715	0.006427	0.327763	0.537275	0.706941	0.992288	0.569409	0.42471	0.003856	0.236504	0.474293	0.744216	0.998715	0.347044
0.322275	0.393365	0.28436	0.242857	0.190476	0.252381	0.014218	0.227488	0.440758	0.720379	1	0.009479	0.274882	0.57346	0.805687	0.995261	0.004739	0.241706	0.436019	0.677725	0.919431	0.445498	0.43128	0.123223	0.128571	0.052381	0.004762	0.004739	0.2891	0.56872	0.838863	1	0.028436	0.317536	0.492891	0.677725	0.886256	0.080569	0.104265	0.236967	0.279621	0.971564	0.417062	0.447619	0.018957	0.241706	0.440758	0.663507	0.890995	0.407583
0.378788	0.363636	0.257576	0.384615	0.215385	0.138462	0.045455	0.19697	0.484848	0.666667	1	0.030303	0.272727	0.469697	0.681818	0.984848	0.015152	0.212121	0.378788	0.757576	0.939394	0.515152	0.212121	0.272727	0.076923	0.076923	0.015385	0.015152	0.272727	0.5	0.666667	1	0.19697	0.227273	0.348485	0.393939	0.772727	0.106061	0.151515	0.621212	0.848485	0.924242	0.318182	0.369231	0.136364	0.257576	0.378788	0.757576	0.939394	0.348485
0.296748	0.52439	0.178862	0.310204	0.126531	0.155102	0.01626	0.321138	0.528455	0.756098	1	0.00813	0.191057	0.504065	0.764228	0.987805	0.004065	0.296748	0.443089	0.601626	0.995935	0.833333	0.146341	0.020325	0.061224	0.012245	0.004082	0.004065	0.207317	0.544715	0.780488	1	0.276423	0.333333	0.443089	0.5	0.926829	0.268293	0.268293	0.272358	0.609756	0.617886	0.654472	0.253061	0.00813	0.166667	0.386179	0.752033	0.995935	0.556911
0.271429	0.4	0.328571	0.231884	0.26087	0.275362	0.114286	0.271429	0.514286	0.685714	0.957143	0.028571	0.157143	0.471429	0.8	1	0.014286	0.2	0.457143	0.757143	0.985714	0.414286	0.385714	0.2	0.188406	0.043478	0.043478	0.014286	0.142857	0.514286	0.7	1	0.042857	0.185714	0.642857	0.857143	0.985714	0.2	0.228571	0.285714	0.414286	0.5	0.357143	0.521739	0.057143	0.214286	0.385714	0.528571	0.971429	0.414286
0.385757	0.25816	0.356083	0.181548	0.282738	0.181548	0.011869	0.204748	0.4273	0.694362	0.991098	0.005935	0.252226	0.519288	0.813056	0.997033	0.002967	0.267062	0.52819	0.724036	1	0.20178	0.089021	0.709199	0.041667	0.089286	0.005952	0.002967	0.237389	0.566766	0.777448	1	0.011869	0.181009	0.388724	0.747774	0.795252	0.017804	0.255193	0.492582	0.712166	0.991098	0.492582	0.464286	0.014837	0.278932	0.513353	0.750742	0.988131	0.195846
0.332031	0.332031	0.335938	0.227451	0.235294	0.243137	0.011719	0.214844	0.4375	0.730469	0.988281	0.019531	0.292969	0.539062	0.71875	0.996094	0.003906	0.246094	0.5	0.761719	1	0.460938	0.292969	0.246094	0.12549	0.062745	0	0.003906	0.230469	0.441406	0.699219	1	0.164062	0.304688	0.503906	0.761719	0.941406	0.050781	0.125	0.53125	0.8125	0.988281	0.5	0.423529	0.015625	0.324219	0.511719	0.761719	0.992188	0.382812
0.343478	0.334783	0.321739	0.231441	0.20524	0.20524	0.008696	0.282609	0.504348	0.782609	0.991304	0.021739	0.243478	0.478261	0.726087	0.986957	0.004348	0.208696	0.495652	0.695652	1	0.452174	0.073913	0.473913	0.034934	0.078603	0	0.004348	0.134783	0.326087	0.608696	1	0.047826	0.613043	0.630435	0.647826	0.691304	0.082609	0.426087	0.569565	0.834783	0.986957	0.504348	0.401747	0.017391	0.23913	0.482609	0.730435	0.986957	0.334783
0.396914	0.237027	0.366059	0.179775	0.327247	0.174157	0.008415	0.26648	0.527349	0.771388	1	0.00561	0.246844	0.486676	0.704067	0.997195	0.001403	0.232819	0.472651	0.740533	0.998597	0.460028	0.225806	0.314165	0.095506	0.064607	0.002809	0.001403	0.210379	0.436185	0.750351	1	0.044881	0.151473	0.420757	0.837307	0.976157	0.007013	0.342216	0.565217	0.726508	0.997195	0.59467	0.41573	0.004208	0.255259	0.486676	0.741935	0.997195	0.237027
0.389474	0.315789	0.294737	0.253968	0.232804	0.190476	0.015789	0.231579	0.5	0.715789	0.994737	0.010526	0.252632	0.468421	0.752632	0.973684	0.005263	0.247368	0.531579	0.736842	1	0.452632	0.163158	0.384211	0.074074	0.084656	0	0.005263	0.321053	0.484211	0.689474	1	0.015789	0.305263	0.715789	0.8	0.994737	0.047368	0.173684	0.415789	0.668421	0.963158	0.447368	0.455026	0.021053	0.242105	0.494737	0.678947	0.989474	0.415789
0.372937	0.323432	0.30363	0.219835	0.213223	0.219835	0.006601	0.29868	0.610561	0.841584	0.988449	0.0033	0.221122	0.442244	0.706271	0.99835	0.00165	0.235974	0.432343	0.660066	1	0.40429	0.128713	0.466997	0.046281	0.105785	0.006612	0.00165	0.280528	0.542904	0.785479	1	0.067657	0.222772	0.382838	0.519802	0.948845	0.00495	0.239274	0.49835	0.737624	0.988449	0.5	0.366942	0.00495	0.19802	0.430693	0.630363	0.9967	0.351485
0.363529	0.375294	0.261176	0.270907	0.175501	0.204947	0.004706	0.238824	0.417647	0.716471	1	0.002353	0.228235	0.475294	0.732941	0.998824	0.001176	0.331765	0.603529	0.771765	0.996471	0.563529	0.123529	0.312941	0.04947	0.061249	0.002356	0.001176	0.210588	0.351765	0.598824	1	0.009412	0.498824	0.637647	0.758824	0.875294	0.021176	0.485882	0.66	0.884706	0.987059	0.487059	0.374558	0.005882	0.277647	0.556471	0.76	0.996471	0.423529
0.44898	0.352041	0.19898	0.333333	0.164103	0.138462	0.015306	0.234694	0.479592	0.734694	1	0.010204	0.265306	0.520408	0.80102	0.994898	0.005102	0.209184	0.515306	0.688776	0.959184	0.52551	0.158163	0.316327	0.041026	0.092308	0	0.005102	0.295918	0.489796	0.836735	1	0.193878	0.326531	0.591837	0.647959	0.688776	0.030612	0.122449	0.428571	0.760204	0.872449	0.428571	0.358974	0.02551	0.239796	0.520408	0.683673	0.954082	0.382653
0.465347	0.217822	0.316832	0.18	0.29	0.1	0.029703	0.277228	0.544554	0.782178	1	0.128713	0.168317	0.316832	0.60396	0.841584	0.009901	0.237624	0.514851	0.742574	0.990099	0.425743	0.287129	0.287129	0.12	0.06	0	0.009901	0.178218	0.643564	0.792079	1	0.29703	0.544554	0.613861	0.821782	0.950495	0.049505	0.108911	0.237624	0.435644	0.514851	0.376238	0.4	0.079208	0.178218	0.465347	0.613861	0.960396	0.188119
0.456522	0.333333	0.210145	0.335766	0.138686	0.189781	0.021739	0.210145	0.442029	0.746377	1	0.014493	0.202899	0.42029	0.644928	0.992754	0.007246	0.369565	0.57971	0.797101	0.971014	0.5	0.318841	0.181159	0.080292	0.080292	0.007299	0.007246	0.253623	0.42029	0.76087	1	0.369565	0.5	0.615942	0.818841	0.956522	0.021739	0.094203	0.137681	0.246377	0.978261	0.326087	0.452555	0.108696	0.268116	0.550725	0.746377	0.971014	0.384058
0.288413	0.394207	0.31738	0.213115	0.17024	0.282472	0.002519	0.29597	0.559194	0.787154	0.998741	0.005038	0.244332	0.482368	0.72796	1	0.001259	0.230479	0.474811	0.739295	0.997481	0.459698	0.244332	0.29597	0.099622	0.054224	0.003783	0.001259	0.209068	0.462217	0.746851	1	0.039043	0.206549	0.423174	0.788413	0.955919	0.006297	0.324937	0.575567	0.700252	0.988665	0.56801	0.398487	0.003778	0.260705	0.478589	0.734257	0.997481	0.384131
0.311258	0.397351	0.291391	0.246667	0.186667	0.26	0.039735	0.238411	0.463576	0.715232	1	0.013245	0.225166	0.523179	0.748344	0.986755	0.006623	0.245033	0.509934	0.721854	0.97351	0.490066	0.125828	0.384106	0.066667	0.093333	0	0.006623	0.139073	0.516556	0.774834	1	0.019868	0.311258	0.443709	0.622517	0.768212	0.18543	0.271523	0.503311	0.688742	0.92053	0.490066	0.4	0.033113	0.251656	0.509934	0.688742	0.960265	0.390728
0.354839	0.270968	0.374194	0.168831	0.25974	0.24026	0.025806	0.193548	0.483871	0.793548	0.987097	0.012903	0.206452	0.445161	0.735484	1	0.006452	0.264516	0.516129	0.709677	0.993548	0.296774	0	0.703226	0	0.103896	0	0.006452	0.187097	0.348387	0.729032	1	0	0	0	0	0	0.051613	0.251613	0.516129	0.76129	0.980645	0.522581	0.363636	0.058065	0.270968	0.548387	0.741935	0.974194	0.283871
0.388158	0.282895	0.328947	0.208791	0.261538	0.18022	0.004386	0.256579	0.508772	0.780702	0.997807	0.017544	0.22807	0.482456	0.717105	1	0.002193	0.258772	0.486842	0.734649	0.995614	0.385965	0.184211	0.429825	0.076923	0.09011	0.002198	0.002193	0.298246	0.513158	0.758772	1	0.100877	0.254386	0.526316	0.774123	0.949561	0.006579	0.199561	0.440789	0.701754	0.989035	0.541667	0.408791	0.006579	0.267544	0.482456	0.717105	0.995614	0.285088
0.361905	0.257143	0.380952	0.153846	0.269231	0.144231	0.057143	0.180952	0.533333	0.780952	0.971429	0.019048	0.285714	0.485714	0.67619	1	0.009524	0.209524	0.47619	0.704762	0.990476	0.438095	0.561905	0	0.173077	0	0	0.009524	0.27619	0.533333	0.790476	1	0.019048	0.190476	0.409524	0.704762	0.980952	0	0	0	0	0	0.390476	0.519231	0.019048	0.209524	0.457143	0.704762	0.980952	0.257143
0.369067	0.356792	0.274141	0.235872	0.231777	0.185094	0.002455	0.269231	0.536825	0.761866	1	0.001637	0.205401	0.461538	0.729133	0.997545	0.000818	0.261866	0.489362	0.747136	0.998363	0.425532	0.202946	0.371522	0.09828	0.070434	0.001638	0.000818	0.180033	0.45581	0.729951	1	0.013912	0.272504	0.488543	0.716858	0.984452	0.026187	0.306874	0.566285	0.788052	0.998363	0.404255	0.484848	0.006547	0.273322	0.521277	0.759411	0.998363	0.376432
0.390909	0.236364	0.372727	0.229358	0.275229	0.155963	0.036364	0.2	0.518182	0.727273	1	0.018182	0.145455	0.381818	0.581818	0.981818	0.009091	0.3	0.527273	0.772727	0.990909	0.363636	0.263636	0.372727	0.082569	0.100917	0.009174	0.009091	0.127273	0.454545	0.763636	1	0.390909	0.481818	0.8	0.872727	0.963636	0.027273	0.181818	0.318182	0.590909	0.7	0.4	0.366972	0.045455	0.4	0.590909	0.854545	0.972727	0.245455
0.56	0.24	0.2	0.306122	0.163265	0.102041	0.06	0.28	0.62	0.8	1	0.04	0.14	0.4	0.6	0.96	0.02	0.24	0.5	0.54	0.86	0.62	0.1	0.28	0.040816	0.081633	0	0.02	0.34	0.6	0.84	1	0.48	0.48	0.5	0.52	0.56	0.12	0.16	0.24	0.3	0.7	0.24	0.244898	0.24	0.44	0.5	0.56	0.86	0.28
0.275552	0.399862	0.324586	0.212163	0.188666	0.25501	0.004834	0.277624	0.517956	0.751381	0.994475	0.001381	0.242403	0.481354	0.723757	0.998619	0.000691	0.226519	0.506215	0.774862	1	0.54558	0.349448	0.104972	0.115411	0.036628	0.00622	0.000691	0.245166	0.473066	0.700276	1	0.014503	0.223066	0.486188	0.766575	0.935773	0.002072	0.361878	0.731354	0.955801	0.998619	0.602901	0.304077	0.002072	0.23895	0.5	0.756906	0.997928	0.412293
0.378007	0.257732	0.364261	0.2	0.275862	0.17931	0.006873	0.316151	0.553265	0.742268	0.975945	0.010309	0.158076	0.38488	0.745704	0.993127	0.003436	0.278351	0.501718	0.735395	1	0.381443	0.268041	0.350515	0.072414	0.051724	0.003448	0.003436	0.216495	0.446735	0.752577	1	0.013746	0.182131	0.522337	0.783505	0.955326	0.054983	0.274914	0.491409	0.67354	0.910653	0.573883	0.337931	0.010309	0.199313	0.43299	0.714777	0.989691	0.278351
0.432773	0.273109	0.294118	0.261603	0.291139	0.151899	0.008403	0.218487	0.537815	0.777311	1	0.02521	0.256303	0.420168	0.710084	0.991597	0.004202	0.260504	0.512605	0.739496	0.97479	0.44958	0.310924	0.239496	0.135021	0.067511	0	0.004202	0.247899	0.483193	0.714286	1	0.113445	0.256303	0.466387	0.722689	0.920168	0.008403	0.084034	0.504202	0.781513	0.970588	0.512605	0.447257	0.012605	0.298319	0.5	0.739496	0.983193	0.247899
0.4	0.339535	0.260465	0.280374	0.242991	0.135514	0.009302	0.24186	0.47907	0.702326	0.981395	0.027907	0.255814	0.423256	0.683721	1	0.004651	0.186047	0.660465	0.832558	0.990698	0.539535	0.144186	0.316279	0.084112	0.065421	0	0.004651	0.274419	0.418605	0.702326	1	0.009302	0.074419	0.572093	0.725581	0.906977	0.097674	0.2	0.548837	0.776744	0.962791	0.511628	0.336449	0.013953	0.330233	0.506977	0.734884	0.962791	0.395349
0.356917	0.427666	0.215417	0.27907	0.150106	0.174419	0.002112	0.192186	0.472017	0.731785	0.998944	0.006336	0.270327	0.589229	0.797254	1	0.001056	0.275607	0.43717	0.599789	0.997888	0.644139	0.105597	0.250264	0.039112	0.053911	0.003171	0.001056	0.210137	0.618796	0.829989	1	0.020063	0.372756	0.481521	0.582893	0.965153	0.040127	0.277719	0.407603	0.560718	0.800422	0.475185	0.325581	0.003168	0.319958	0.501584	0.739176	0.986272	0.451954
0.405263	0.289474	0.305263	0.242744	0.229551	0.189974	0.013158	0.242105	0.510526	0.789474	1	0.005263	0.268421	0.526316	0.768421	0.997368	0.002632	0.231579	0.447368	0.655263	0.978947	0.439474	0.134211	0.426316	0.047493	0.079156	0.005277	0.002632	0.336842	0.584211	0.831579	1	0.15	0.289474	0.378947	0.568421	0.660526	0.007895	0.121053	0.413158	0.707895	0.992105	0.5	0.343008	0.015789	0.221053	0.439474	0.636842	0.978947	0.328947
0.376605	0.356633	0.266762	0.27	0.215714	0.174286	0.005706	0.268188	0.520685	0.761769	0.99572	0.002853	0.201141	0.445078	0.740371	1	0.001427	0.339515	0.536377	0.743224	0.998573	0.620542	0.135521	0.243937	0.065714	0.057143	0.005714	0.001427	0.225392	0.472183	0.733238	1	0.039943	0.373752	0.579173	0.825963	0.951498	0.054208	0.360913	0.529244	0.774608	0.998573	0.422254	0.402857	0.007133	0.266762	0.479315	0.699001	0.994294	0.39515
0.320856	0.406417	0.272727	0.236559	0.193548	0.204301	0.010695	0.144385	0.427807	0.641711	0.994652	0.016043	0.358289	0.71123	0.84492	0.983957	0.005348	0.213904	0.406417	0.566845	1	0.540107	0.171123	0.28877	0.064516	0.053763	0.010753	0.005348	0.165775	0.673797	0.850267	1	0.144385	0.192513	0.347594	0.459893	0.786096	0.032086	0.454545	0.534759	0.604278	0.860963	0.433155	0.376344	0.026738	0.294118	0.465241	0.59893	0.97861	0.406417
0.314425	0.463533	0.222042	0.26461	0.157468	0.194805	0.006483	0.222042	0.505673	0.748784	0.996759	0.003241	0.269044	0.47812	0.724473	1	0.001621	0.241491	0.547812	0.777958	0.998379	0.654781	0.029173	0.316045	0.025974	0.061688	0	0.001621	0.314425	0.518639	0.750405	1	0.009724	0.320908	0.52188	0.696921	0.820097	0.06483	0.19611	0.354943	0.893031	0.990276	0.486224	0.373377	0.009724	0.291734	0.606159	0.771475	0.983793	0.494327
0.344086	0.333333	0.322581	0.282609	0.206522	0.304348	0.032258	0.290323	0.526882	0.698925	1	0.021505	0.215054	0.451613	0.83871	0.989247	0.010753	0.204301	0.483871	0.655914	0.946237	0.333333	0.365591	0.301075	0.130435	0.043478	0	0.010753	0.11828	0.419355	0.784946	1	0.053763	0.365591	0.698925	0.860215	0.956989	0.150538	0.215054	0.430108	0.505376	0.580645	0.526882	0.326087	0.053763	0.215054	0.397849	0.602151	0.946237	0.354839
0.423729	0.378531	0.19774	0.335227	0.102273	0.1875	0.028249	0.231638	0.564972	0.841808	1	0.011299	0.214689	0.457627	0.689266	0.99435	0.00565	0.265537	0.435028	0.632768	0.943503	0.463277	0.259887	0.276836	0.073864	0.039773	0.017045	0.00565	0.112994	0.367232	0.553672	1	0.146893	0.265537	0.435028	0.717514	0.80226	0.220339	0.570621	0.644068	0.887006	0.960452	0.446328	0.306818	0.016949	0.271186	0.451977	0.694915	0.943503	0.367232
0.214575	0.578947	0.206478	0.176471	0.097363	0.237323	0.022267	0.244939	0.38664	0.744939	1	0.004049	0.259109	0.552632	0.751012	0.995951	0.002024	0.226721	0.47166	0.734818	0.993927	0.789474	0.032389	0.178138	0.016227	0.060852	0	0.002024	0.222672	0.47166	0.710526	1	0.008097	0.01417	0.433198	0.98583	0.993927	0.022267	0.396761	0.672065	0.765182	0.809717	0.451417	0.332657	0.010121	0.200405	0.508097	0.704453	0.993927	0.595142
0.330645	0.383065	0.28629	0.210526	0.202429	0.174089	0.028226	0.225806	0.471774	0.689516	0.955645	0.008065	0.254032	0.58871	0.879032	1	0.004032	0.233871	0.439516	0.608871	0.887097	0.53629	0.21371	0.25	0.048583	0.05668	0.016194	0.004032	0.193548	0.483871	0.862903	1	0.133065	0.225806	0.362903	0.604839	0.858871	0.104839	0.28629	0.520161	0.693548	0.806452	0.395161	0.331984	0.096774	0.28629	0.504032	0.645161	0.975806	0.423387
0.348214	0.366071	0.285714	0.216216	0.18018	0.153153	0.044643	0.285714	0.508929	0.776786	0.991071	0.080357	0.214286	0.428571	0.625	1	0.008929	0.1875	0.535714	0.723214	0.928571	0.446429	0.205357	0.348214	0.09009	0.09009	0	0.008929	0.232143	0.401786	0.625	1	0.017857	0.053571	0.196429	0.571429	0.741071	0.276786	0.455357	0.660714	0.883929	0.973214	0.383929	0.378378	0.026786	0.196429	0.428571	0.696429	0.928571	0.392857
0.358242	0.432967	0.208791	0.248899	0.167401	0.143172	0.006593	0.224176	0.437363	0.672527	1	0.004396	0.27033	0.586813	0.815385	0.997802	0.002198	0.276923	0.483516	0.643956	0.995604	0.657143	0.063736	0.279121	0.030837	0.044053	0.004405	0.002198	0.210989	0.586813	0.784615	1	0.068132	0.32967	0.364835	0.417582	0.643956	0.101099	0.259341	0.501099	0.718681	0.947253	0.4	0.352423	0.017582	0.274725	0.483516	0.694505	0.971429	0.452747
0.236842	0.52193	0.241228	0.211454	0.123348	0.229075	0.013158	0.298246	0.447368	0.75	0.995614	0.008772	0.197368	0.548246	0.745614	0.991228	0.004386	0.232456	0.451754	0.719298	1	0.79386	0.096491	0.109649	0.044053	0.026432	0	0.004386	0.25	0.574561	0.77193	1	0.149123	0.258772	0.285088	0.342105	0.460526	0.201754	0.223684	0.377193	0.403509	0.97807	0.570175	0.325991	0.017544	0.315789	0.596491	0.741228	0.986842	0.486842
0.4	0.27907	0.32093	0.214953	0.247664	0.205607	0.023256	0.260465	0.539535	0.813953	1	0.013953	0.209302	0.460465	0.702326	0.948837	0.004651	0.251163	0.497674	0.711628	0.962791	0.446512	0.386047	0.167442	0.135514	0.060748	0.004673	0.004651	0.311628	0.6	0.813953	1	0.009302	0.27907	0.446512	0.623256	0.962791	0.069767	0.204651	0.246512	0.753488	0.930233	0.44186	0.392523	0.009302	0.232558	0.44186	0.67907	0.962791	0.297674
0.451939	0.298482	0.249578	0.280405	0.206081	0.179054	0.008432	0.273187	0.499157	0.730185	0.996627	0.003373	0.264755	0.475548	0.745363	0.998314	0.001686	0.220911	0.51602	0.772344	1	0.51602	0.129848	0.354132	0.054054	0.084459	0	0.001686	0.234401	0.460371	0.655987	1	0.11973	0.219224	0.337268	0.790894	0.991568	0.016863	0.300169	0.625632	0.865093	0.984823	0.318718	0.361486	0.005059	0.175379	0.504216	0.79258	0.993255	0.338954
0.362708	0.309068	0.328225	0.221228	0.257033	0.195652	0.007663	0.293742	0.53129	0.749681	0.994891	0.002554	0.219668	0.473819	0.729246	0.997446	0.001277	0.217114	0.44189	0.772669	1	0.47765	0.246488	0.275862	0.086957	0.066496	0.002558	0.001277	0.236271	0.537676	0.753512	1	0.005109	0.251596	0.505747	0.772669	0.971903	0.066411	0.283525	0.402299	0.727969	0.996169	0.538953	0.375959	0.006386	0.215837	0.427842	0.722861	0.996169	0.357599
0.27451	0.502451	0.223039	0.238037	0.11411	0.213497	0.002451	0.259804	0.48652	0.794118	1	0.003676	0.203431	0.457108	0.675245	0.998775	0.001225	0.340686	0.604167	0.792892	0.997549	0.682598	0.171569	0.145833	0.077301	0.040491	0.003681	0.001225	0.234069	0.498775	0.762255	1	0.04902	0.468137	0.632353	0.785539	0.991422	0.082108	0.214461	0.269608	0.405637	0.944853	0.457108	0.33865	0.01348	0.22549	0.534314	0.713235	0.992647	0.471814
0.369942	0.369942	0.260116	0.284884	0.197674	0.238372	0.011561	0.202312	0.445087	0.803468	1	0.023121	0.260116	0.49711	0.716763	0.99422	0.00578	0.254335	0.520231	0.710983	0.965318	0.566474	0.179191	0.254335	0.052326	0.075581	0.005814	0.00578	0.17341	0.34104	0.624277	1	0.242775	0.393064	0.635838	0.682081	0.884393	0.023121	0.491329	0.734104	0.797688	0.965318	0.549133	0.337209	0.023121	0.33526	0.554913	0.710983	0.965318	0.398844
0.388383	0.369021	0.242597	0.287343	0.191562	0.173318	0.004556	0.323462	0.595672	0.816629	0.998861	0.002278	0.224374	0.473804	0.722096	0.994305	0.001139	0.214123	0.411162	0.646925	1	0.501139	0.120729	0.378132	0.051311	0.085519	0.003421	0.001139	0.214123	0.550114	0.790433	1	0.045558	0.258542	0.41344	0.657175	0.867882	0.059226	0.266515	0.472665	0.675399	0.98861	0.403189	0.330673	0.004556	0.222096	0.414579	0.6082	0.980638	0.405467
0.317647	0.405882	0.276471	0.280236	0.179941	0.221239	0.011765	0.223529	0.523529	0.741176	0.997059	0.005882	0.226471	0.473529	0.697059	0.991176	0.002941	0.273529	0.564706	0.785294	1	0.482353	0.076471	0.441176	0.044248	0.085546	0.00295	0.002941	0.15	0.538235	0.797059	1	0.035294	0.129412	0.611765	0.952941	0.988235	0.082353	0.308824	0.467647	0.702941	0.908824	0.473529	0.39528	0.029412	0.282353	0.479412	0.732353	0.970588	0.444118
0.393103	0.351724	0.255172	0.25	0.229167	0.152778	0.013793	0.282759	0.544828	0.77931	1	0.02069	0.234483	0.57931	0.868966	0.972414	0.006897	0.131034	0.337931	0.524138	0.765517	0.675862	0.103448	0.22069	0.090278	0.0625	0.006944	0.006897	0.227586	0.558621	0.827586	1	0.082759	0.096552	0.393103	0.510345	0.586207	0.068966	0.303448	0.468966	0.675862	0.731034	0.310345	0.305556	0.075862	0.213793	0.4	0.537931	0.737931	0.372414
0.584906	0.339623	0.075472	0.346154	0.134615	0.019231	0.037736	0.245283	0.528302	0.716981	1	0.018868	0.264151	0.490566	0.754717	0.962264	0.056604	0.056604	0.09434	0.226415	0.509434	0.849057	0.132075	0.018868	0.076923	0.038462	0	0.018868	0.339623	0.54717	0.754717	1	0.037736	0.037736	0.075472	0.169811	0.207547	0.792453	0.792453	0.792453	0.792453	0.792453	0.09434	0.192308	0.09434	0.09434	0.226415	0.433962	0.566038	0.433962
0.307125	0.371007	0.321867	0.236453	0.197044	0.268473	0.012285	0.262899	0.461916	0.746929	0.997543	0.009828	0.211302	0.520885	0.744472	1	0.002457	0.260442	0.5086	0.734644	0.985258	0.331695	0.088452	0.579853	0.034483	0.1133	0.004926	0.002457	0.19656	0.366093	0.692875	1	0.063882	0.12285	0.206388	0.297297	0.363636	0.019656	0.410319	0.597052	0.786241	0.990172	0.550369	0.438424	0.007371	0.257985	0.454545	0.690418	0.987715	0.385749
0.266541	0.429112	0.304348	0.179924	0.176136	0.285985	0.017013	0.362949	0.553875	0.814745	0.99811	0.003781	0.155009	0.398866	0.697543	0.996219	0.00189	0.289225	0.514178	0.725898	1	0.627599	0.204159	0.168242	0.079545	0.034091	0	0.00189	0.166352	0.431002	0.729679	1	0.056711	0.345936	0.523629	0.741021	0.94896	0.241966	0.413989	0.640832	0.763705	0.886578	0.483932	0.337121	0.022684	0.192817	0.444234	0.705104	0.990548	0.425331
0.34205	0.354603	0.303347	0.237049	0.206698	0.21978	0.002615	0.239017	0.496339	0.745293	0.999477	0.001046	0.289749	0.526674	0.758891	1	0.000523	0.221757	0.462343	0.748954	0.998431	0.492678	0.106695	0.400628	0.048666	0.081109	0.002616	0.000523	0.312762	0.535565	0.737448	1	0.002615	0.244247	0.401151	0.573745	0.98431	0.018305	0.194561	0.5	0.804916	0.996339	0.529812	0.376766	0.001569	0.247385	0.508368	0.749477	0.998431	0.379184
0.327526	0.310105	0.362369	0.202797	0.276224	0.230769	0.045296	0.275261	0.54007	0.790941	1	0.006969	0.195122	0.480836	0.66899	0.982578	0.003484	0.25784	0.477352	0.735192	0.993031	0.397213	0.1777	0.425087	0.052448	0.08042	0.003497	0.003484	0.202091	0.529617	0.71777	1	0.006969	0.261324	0.393728	0.595819	0.686411	0.034843	0.240418	0.505226	0.794425	0.961672	0.550523	0.405594	0.006969	0.233449	0.445993	0.658537	0.993031	0.324042
0.262664	0.476548	0.260788	0.214286	0.148496	0.236842	0.030019	0.249531	0.439024	0.727955	1	0.007505	0.26454	0.534709	0.78424	0.998124	0.001876	0.213884	0.500938	0.724203	0.994371	0.686679	0.166979	0.146341	0.067669	0.037594	0.003759	0.001876	0.275797	0.553471	0.804878	1	0.015009	0.238274	0.377111	0.690432	0.981238	0.016886	0.195122	0.341463	0.716698	0.834897	0.484053	0.368421	0.009381	0.358349	0.641651	0.827392	0.994371	0.45591
0.359801	0.26799	0.372208	0.190062	0.277019	0.224845	0.006203	0.248139	0.522333	0.751861	0.998759	0.004963	0.258065	0.486352	0.734491	0.980149	0.001241	0.241935	0.495037	0.754342	1	0.48139	0.222084	0.296526	0.095652	0.055901	0.003727	0.001241	0.210918	0.451613	0.736973	1	0.040943	0.183623	0.426799	0.800248	0.997519	0.006203	0.332506	0.554591	0.7134	0.991315	0.57072	0.404969	0.003722	0.244417	0.478908	0.743176	0.997519	0.290323
0.32964	0.454294	0.216066	0.302778	0.144444	0.169444	0.00554	0.310249	0.556787	0.770083	1	0.019391	0.210526	0.421053	0.731302	0.99723	0.00277	0.32687	0.520776	0.725762	0.99446	0.66759	0.091413	0.240997	0.05	0.061111	0.011111	0.00277	0.229917	0.493075	0.750693	1	0.33241	0.470914	0.506925	0.725762	0.99169	0.00831	0.171745	0.457064	0.795014	0.98892	0.34626	0.35	0.022161	0.246537	0.498615	0.714681	0.99446	0.468144
0.28551	0.392577	0.321913	0.234286	0.175714	0.248571	0.001428	0.290507	0.508922	0.758744	0.996431	0.002855	0.231263	0.473947	0.73733	0.999286	0.000714	0.243398	0.517488	0.750178	1	0.539615	0.373305	0.087081	0.117143	0.027143	0.004286	0.000714	0.24768	0.484654	0.721627	1	0.002141	0.227695	0.492505	0.744468	0.93576	0.033547	0.321199	0.660956	0.958601	0.995004	0.610992	0.29	0.002141	0.255532	0.523911	0.753747	0.998572	0.427552
0.375	0.359375	0.265625	0.285714	0.206349	0.222222	0.046875	0.25	0.5	0.8125	1	0.03125	0.109375	0.375	0.640625	0.9375	0.015625	0.3125	0.53125	0.71875	0.984375	0.71875	0.171875	0.109375	0.126984	0.063492	0	0.015625	0.234375	0.5625	0.734375	1	0.265625	0.28125	0.421875	0.53125	0.875	0.078125	0.078125	0.109375	0.78125	0.8125	0.28125	0.380952	0.265625	0.328125	0.53125	0.625	0.875	0.375
0.337079	0.41573	0.247191	0.278873	0.15493	0.216901	0.005618	0.230337	0.474719	0.755618	0.997191	0.008427	0.27809	0.542135	0.764045	0.988764	0.002809	0.219101	0.469101	0.716292	1	0.542135	0.168539	0.289326	0.070423	0.053521	0.008451	0.002809	0.272472	0.530899	0.794944	1	0.087079	0.148876	0.491573	0.733146	0.977528	0.05618	0.247191	0.441011	0.679775	0.896067	0.424157	0.383099	0.022472	0.241573	0.438202	0.69382	0.994382	0.455056
0.337705	0.311475	0.35082	0.203947	0.223684	0.256579	0.009836	0.206557	0.488525	0.786885	0.996721	0.006557	0.262295	0.491803	0.718033	0.990164	0.003279	0.255738	0.498361	0.72459	1	0.468852	0.265574	0.265574	0.092105	0.052632	0	0.003279	0.229508	0.422951	0.704918	1	0.019672	0.2	0.459016	0.678689	0.816393	0.029508	0.35082	0.518033	0.885246	0.957377	0.534426	0.355263	0.022951	0.285246	0.491803	0.72459	0.983607	0.370492
0.38565	0.318386	0.295964	0.252252	0.247748	0.162162	0.017937	0.224215	0.502242	0.721973	1	0.008969	0.273543	0.430493	0.690583	0.950673	0.004484	0.210762	0.600897	0.798206	0.986547	0.506726	0.125561	0.367713	0.058559	0.058559	0.004505	0.004484	0.295964	0.421525	0.704036	1	0.080717	0.139013	0.609865	0.762332	0.932735	0.017937	0.201794	0.55157	0.793722	0.986547	0.497758	0.378378	0.026906	0.300448	0.533632	0.789238	0.986547	0.331839
0.393665	0.321267	0.285068	0.222727	0.245455	0.195455	0.022624	0.244344	0.556561	0.846154	1	0.00905	0.180995	0.506787	0.733032	0.963801	0.004525	0.230769	0.41629	0.647059	0.927602	0.443439	0.334842	0.221719	0.113636	0.068182	0.013636	0.004525	0.262443	0.61991	0.81448	1	0.036199	0.312217	0.447964	0.588235	0.923077	0.013575	0.095023	0.244344	0.850679	0.963801	0.384615	0.4	0.0181	0.235294	0.41629	0.624434	0.923077	0.366516
0.31094	0.370441	0.318618	0.240385	0.205769	0.242308	0.015355	0.307102	0.556622	0.771593	0.998081	0.007678	0.236084	0.491363	0.775432	1	0.001919	0.21881	0.441459	0.683301	0.996161	0.429942	0.153551	0.416507	0.053846	0.076923	0.015385	0.001919	0.170825	0.476008	0.754319	1	0.038388	0.357006	0.577735	0.715931	0.857965	0.072937	0.25144	0.491363	0.742802	0.975048	0.558541	0.357692	0.003839	0.234165	0.462572	0.68906	0.950096	0.385797
0.201258	0.553459	0.245283	0.177215	0.082278	0.265823	0.018868	0.18239	0.27044	0.383648	1	0.012579	0.345912	0.540881	0.748428	0.987421	0.006289	0.257862	0.572327	0.767296	0.968553	0.754717	0.012579	0.232704	0.012658	0.025316	0	0.006289	0.433962	0.622642	0.811321	1	0.069182	0.069182	0.069182	0.069182	0.075472	0.113208	0.188679	0.245283	0.301887	0.36478	0.679245	0.291139	0.025157	0.358491	0.610063	0.786164	0.968553	0.54717
0.354108	0.458924	0.186969	0.292614	0.116477	0.198864	0.008499	0.215297	0.371105	0.674221	0.988669	0.005666	0.294618	0.543909	0.78187	1	0.002833	0.303116	0.498584	0.747875	0.997167	0.866856	0.036827	0.096317	0.019886	0.03125	0.014205	0.002833	0.252125	0.535411	0.776204	1	0.016997	0.022663	0.076487	0.345609	0.86119	0.067989	0.25779	0.29745	0.354108	0.569405	0.31728	0.323864	0.014164	0.314448	0.518414	0.756374	0.983003	0.444759
0.465714	0.35	0.184286	0.267525	0.164521	0.127325	0.002857	0.212857	0.492857	0.775714	0.998571	0.004286	0.234286	0.401429	0.664286	0.994286	0.001429	0.458571	0.604286	0.772857	1	0.607143	0.1	0.292857	0.041488	0.038627	0.001431	0.001429	0.178571	0.335714	0.607143	1	0.134286	0.468571	0.53	0.601429	0.96	0.024286	0.561429	0.734286	0.807143	0.881429	0.438571	0.309013	0.021429	0.351429	0.54	0.771429	0.994286	0.372857
0.463087	0.362416	0.174497	0.364865	0.162162	0.128378	0.020134	0.268456	0.503356	0.718121	0.993289	0.013423	0.308725	0.516779	0.765101	1	0.006711	0.114094	0.295302	0.731544	0.95302	0.348993	0.040268	0.610738	0.02027	0.141892	0.006757	0.006711	0.248322	0.489933	0.765101	1	0.147651	0.147651	0.161074	0.33557	0.348993	0.033557	0.255034	0.57047	0.738255	0.973154	0.33557	0.432432	0.026846	0.194631	0.583893	0.731544	0.95302	0.416107
0.36534	0.393443	0.241218	0.248535	0.173505	0.203986	0.004684	0.277518	0.514052	0.74356	0.998829	0.002342	0.208431	0.429742	0.713115	0.991803	0.001171	0.272834	0.537471	0.797424	1	0.586651	0.118267	0.295082	0.059789	0.071512	0.008206	0.001171	0.201405	0.409836	0.668618	1	0.016393	0.144028	0.377049	0.567916	0.980094	0.070258	0.482436	0.741218	0.855972	0.996487	0.352459	0.361079	0.016393	0.192037	0.47541	0.795082	0.994145	0.400468
0.336134	0.361345	0.302521	0.237288	0.220339	0.220339	0.042017	0.268908	0.596639	0.789916	0.991597	0.02521	0.226891	0.445378	0.731092	0.915966	0.008403	0.252101	0.403361	0.689076	1	0.512605	0.142857	0.344538	0.067797	0.084746	0	0.008403	0.310924	0.714286	0.840336	1	0.02521	0.117647	0.151261	0.184874	0.991597	0.226891	0.302521	0.478992	0.613445	0.705882	0.436975	0.491525	0.016807	0.176471	0.403361	0.705882	0.983193	0.302521
0.353211	0.330275	0.316514	0.239631	0.248848	0.179724	0.022936	0.201835	0.472477	0.733945	0.995413	0.009174	0.266055	0.522936	0.770642	1	0.004587	0.238532	0.463303	0.651376	0.981651	0.353211	0.224771	0.422018	0.078341	0.069124	0.013825	0.004587	0.288991	0.619266	0.83945	1	0.178899	0.247706	0.431193	0.697248	0.940367	0.027523	0.133028	0.481651	0.591743	0.986239	0.5	0.442396	0.013761	0.266055	0.518349	0.729358	0.981651	0.293578
0.321782	0.425743	0.252475	0.258706	0.149254	0.233831	0.029703	0.391089	0.544554	0.717822	0.970297	0.009901	0.212871	0.450495	0.792079	1	0.00495	0.128713	0.356436	0.688119	0.990099	0.430693	0.138614	0.430693	0.074627	0.044776	0.004975	0.00495	0.207921	0.39604	0.871287	1	0.014851	0.128713	0.29703	0.371287	0.89604	0.019802	0.470297	0.579208	0.712871	0.861386	0.39604	0.457711	0.019802	0.282178	0.405941	0.722772	0.980198	0.445545
0.359649	0.302632	0.337719	0.237885	0.268722	0.193833	0.026316	0.223684	0.442982	0.688596	1	0.017544	0.302632	0.600877	0.798246	0.986842	0.004386	0.210526	0.447368	0.714912	0.995614	0.355263	0.20614	0.438596	0.070485	0.061674	0	0.004386	0.311404	0.627193	0.885965	1	0.013158	0.263158	0.438596	0.846491	0.973684	0.030702	0.144737	0.482456	0.596491	0.820175	0.517544	0.475771	0.008772	0.27193	0.52193	0.745614	0.969298	0.298246
0.363636	0.222222	0.414141	0.152284	0.335025	0.182741	0.010101	0.232323	0.409091	0.69697	0.994949	0.035354	0.212121	0.545455	0.777778	0.989899	0.005051	0.267677	0.540404	0.742424	1	0.40404	0.212121	0.383838	0.071066	0.091371	0.020305	0.005051	0.141414	0.5	0.681818	1	0.045455	0.217172	0.570707	0.89899	0.989899	0.186869	0.338384	0.439394	0.757576	0.919192	0.464646	0.436548	0.045455	0.343434	0.505051	0.727273	0.984848	0.161616
0.316113	0.364084	0.319803	0.237685	0.23399	0.225369	0.00246	0.259533	0.531365	0.773678	1	0.00492	0.238622	0.463715	0.712177	0.99754	0.00123	0.255843	0.512915	0.769988	0.99877	0.464945	0.239852	0.295203	0.096059	0.059113	0.002463	0.00123	0.230012	0.478475	0.738007	1	0.04182	0.198032	0.415744	0.801968	0.99877	0.00615	0.319803	0.570726	0.706027	0.99262	0.564576	0.399015	0.00369	0.258303	0.468635	0.742927	0.99877	0.383764
0.49115	0.314159	0.19469	0.263858	0.146341	0.144124	0.00885	0.387168	0.659292	0.80531	1	0.004425	0.227876	0.415929	0.630531	0.997788	0.002212	0.152655	0.311947	0.480088	0.993363	0.679204	0.141593	0.179204	0.042129	0.064302	0.002217	0.002212	0.334071	0.637168	0.807522	1	0.013274	0.121681	0.188053	0.455752	0.993363	0.050885	0.15708	0.307522	0.411504	0.942478	0.314159	0.252772	0.019912	0.154867	0.263274	0.418142	0.995575	0.387168
0.318912	0.346106	0.334981	0.209158	0.226485	0.237624	0.002472	0.254635	0.50309	0.746601	0.998764	0.004944	0.245983	0.487021	0.736712	1	0.001236	0.228677	0.494438	0.751545	0.997528	0.469716	0.236094	0.29419	0.09901	0.054455	0.002475	0.001236	0.229913	0.484549	0.744129	1	0.038319	0.197775	0.415328	0.803461	0.997528	0.00618	0.320148	0.537701	0.708282	0.991347	0.552534	0.398515	0.003708	0.255871	0.469716	0.735476	0.997528	0.385661
0.347826	0.357488	0.294686	0.257282	0.194175	0.179612	0.014493	0.227053	0.463768	0.710145	1	0.009662	0.280193	0.555556	0.772947	0.995169	0.004831	0.236715	0.478261	0.695652	0.975845	0.487923	0.173913	0.338164	0.067961	0.067961	0.019417	0.004831	0.154589	0.516908	0.714976	1	0.236715	0.309179	0.63285	0.94686	0.990338	0.038647	0.342995	0.444444	0.729469	0.922705	0.47343	0.427184	0.019324	0.352657	0.516908	0.7343	0.985507	0.386473
0.436782	0.350575	0.212644	0.33526	0.156069	0.150289	0.017241	0.218391	0.494253	0.758621	1	0.011494	0.258621	0.488506	0.729885	0.971264	0.005747	0.229885	0.45977	0.683908	0.867816	0.574713	0.178161	0.247126	0.121387	0.052023	0.00578	0.005747	0.247126	0.465517	0.816092	1	0.022989	0.431034	0.591954	0.695402	0.867816	0.04023	0.166667	0.298851	0.551724	0.770115	0.33908	0.346821	0.022989	0.287356	0.482759	0.678161	0.856322	0.385057
0.446009	0.29108	0.262911	0.207547	0.264151	0.150943	0.00939	0.253521	0.478873	0.71831	0.995305	0.014085	0.328638	0.605634	0.816901	0.985915	0.004695	0.206573	0.408451	0.652582	1	0.516432	0.234742	0.248826	0.108491	0.042453	0.014151	0.004695	0.328638	0.525822	0.769953	1	0.032864	0.253521	0.384977	0.877934	0.948357	0.014085	0.103286	0.43662	0.58216	0.694836	0.262911	0.320755	0.018779	0.15493	0.356808	0.633803	0.938967	0.28169
0.413793	0.37931	0.206897	0.288184	0.149856	0.18732	0.011494	0.29023	0.482759	0.772989	0.971264	0.005747	0.238506	0.5	0.744253	1	0.002874	0.215517	0.436782	0.718391	0.994253	0.482759	0.20977	0.307471	0.074928	0.086455	0	0.002874	0.158046	0.408046	0.695402	1	0.126437	0.270115	0.594828	0.718391	0.994253	0.008621	0.310345	0.531609	0.795977	0.95977	0.399425	0.334294	0.020115	0.270115	0.531609	0.75	0.994253	0.41954
0.340836	0.363344	0.29582	0.245161	0.183871	0.2	0.009646	0.308682	0.578778	0.778135	1	0.006431	0.167203	0.434084	0.649518	0.996785	0.003215	0.276527	0.517685	0.77492	0.990354	0.421222	0.221865	0.356913	0.077419	0.058065	0	0.003215	0.167203	0.44373	0.649518	1	0.051447	0.196141	0.418006	0.755627	0.945338	0.096463	0.366559	0.572347	0.829582	0.983923	0.546624	0.335484	0.054662	0.237942	0.472669	0.726688	0.990354	0.379421
0.264516	0.44086	0.294624	0.226293	0.170259	0.232759	0.004301	0.189247	0.462366	0.707527	0.997849	0.006452	0.301075	0.554839	0.782796	1	0.002151	0.206452	0.423656	0.675269	0.995699	0.44086	0.189247	0.369892	0.068966	0.073276	0.00431	0.002151	0.286022	0.509677	0.767742	1	0.12043	0.266667	0.623656	0.756989	0.929032	0.025806	0.204301	0.430108	0.696774	0.989247	0.544086	0.396552	0.008602	0.27957	0.51828	0.733333	0.995699	0.44086
0.413665	0.335404	0.250932	0.247512	0.18408	0.177861	0.004969	0.204969	0.490683	0.715528	1	0.002484	0.264596	0.493168	0.762733	0.996273	0.001242	0.309317	0.546584	0.744099	0.997516	0.565217	0.122981	0.311801	0.044776	0.069652	0.004975	0.001242	0.160248	0.356522	0.715528	1	0.032298	0.424845	0.614907	0.745342	0.991304	0.045963	0.382609	0.583851	0.802484	0.980124	0.419876	0.318408	0.040994	0.326708	0.50559	0.744099	0.997516	0.385093
0.360424	0.286219	0.353357	0.205674	0.241135	0.202128	0.007067	0.24735	0.526502	0.812721	0.992933	0.014134	0.279152	0.512367	0.731449	1	0.003534	0.226148	0.459364	0.696113	0.968198	0.409894	0.176678	0.413428	0.06383	0.092199	0	0.003534	0.190813	0.44523	0.696113	1	0.123675	0.289753	0.540636	0.583039	0.975265	0.024735	0.243816	0.4947	0.787986	0.939929	0.551237	0.397163	0.014134	0.229682	0.466431	0.664311	0.992933	0.286219
0.284133	0.398524	0.317343	0.203704	0.207407	0.248148	0.055351	0.383764	0.549815	0.789668	1	0.00738	0.199262	0.464945	0.734317	0.99262	0.00369	0.206642	0.453875	0.730627	0.98893	0.608856	0.321033	0.070111	0.1	0.040741	0.003704	0.00369	0.232472	0.542435	0.763838	1	0.01107	0.284133	0.494465	0.664207	0.95572	0.04059	0.051661	0.132841	0.457565	0.575646	0.538745	0.288889	0.01107	0.254613	0.542435	0.752768	0.9631	0.394834
0.335404	0.322981	0.341615	0.25625	0.21875	0.25	0.012422	0.26087	0.434783	0.745342	0.993789	0.049689	0.248447	0.52795	0.73913	1	0.006211	0.186335	0.484472	0.732919	0.956522	0.354037	0.304348	0.341615	0.13125	0.04375	0.00625	0.006211	0.136646	0.52795	0.732919	1	0.012422	0.229814	0.57764	0.826087	0.925466	0.15528	0.304348	0.391304	0.614907	0.981366	0.372671	0.4625	0.018634	0.192547	0.496894	0.689441	0.919255	0.31677
0.384712	0.270677	0.344612	0.205772	0.292346	0.200753	0.007519	0.263158	0.501253	0.756892	1	0.005013	0.236842	0.483709	0.734336	0.994987	0.001253	0.240602	0.508772	0.746867	0.997494	0.463659	0.241855	0.294486	0.105395	0.055207	0.002509	0.001253	0.23183	0.483709	0.739348	1	0.038847	0.197995	0.41604	0.795739	0.997494	0.006266	0.319549	0.541353	0.703008	0.992481	0.570175	0.409034	0.003759	0.264411	0.47619	0.741855	0.997494	0.303258
0.424528	0.358491	0.216981	0.285714	0.171429	0.161905	0.028302	0.198113	0.396226	0.613208	0.877358	0.018868	0.301887	0.622642	0.773585	1	0.009434	0.226415	0.518868	0.801887	0.981132	0.273585	0	0.726415	0	0.057143	0	0.009434	0.066038	0.669811	0.924528	1	0	0	0	0	0	0.084906	0.254717	0.462264	0.641509	0.896226	0.292453	0.361905	0.226415	0.386792	0.59434	0.801887	0.962264	0.349057
0.32439	0.346341	0.329268	0.200244	0.238095	0.234432	0.002439	0.273171	0.55122	0.787805	1	0.004878	0.218293	0.45122	0.709756	0.996341	0.00122	0.260976	0.507317	0.752439	0.99878	0.468293	0.242683	0.289024	0.107448	0.051282	0.002442	0.00122	0.210976	0.464634	0.740244	1	0.037805	0.202439	0.420732	0.80122	0.99878	0.006098	0.32439	0.541463	0.702439	0.992683	0.559756	0.398046	0.003659	0.265854	0.47439	0.74878	0.99878	0.371951
0.309108	0.366145	0.324747	0.229282	0.221915	0.223757	0.00184	0.26219	0.515179	0.765409	0.99724	0.00368	0.25115	0.484821	0.74057	0.99908	0.00092	0.23827	0.5023	0.74609	1	0.414903	0.130635	0.454462	0.046961	0.069061	0.000921	0.00092	0.282429	0.49126	0.74425	1	0.048758	0.135235	0.477461	0.73781	0.955842	0.00736	0.228151	0.536339	0.766329	0.980681	0.5023	0.441989	0.00276	0.25115	0.49954	0.74977	0.99632	0.402944
0.331915	0.310638	0.357447	0.213675	0.247863	0.230769	0.017021	0.251064	0.553191	0.791489	0.995745	0.008511	0.178723	0.429787	0.66383	0.931915	0.004255	0.297872	0.489362	0.73617	1	0.451064	0.323404	0.225532	0.106838	0.07265	0.004274	0.004255	0.208511	0.442553	0.634043	1	0.046809	0.187234	0.32766	0.570213	0.812766	0.025532	0.685106	0.851064	0.906383	0.974468	0.53617	0.34188	0.046809	0.27234	0.510638	0.731915	0.961702	0.33617
0.336	0.4192	0.2448	0.258013	0.152244	0.189103	0.0144	0.2976	0.5424	0.7664	0.9984	0.0032	0.2576	0.592	0.8224	1	0.0016	0.2096	0.3584	0.5344	0.9408	0.5872	0.1152	0.2976	0.041667	0.076923	0.003205	0.0016	0.2896	0.6848	0.8432	1	0.1216	0.2576	0.4016	0.5264	0.6048	0.016	0.1872	0.3648	0.536	0.9952	0.4032	0.307692	0.0192	0.2176	0.3776	0.5568	0.976	0.4192
0.411765	0.323529	0.264706	0.237037	0.214815	0.162963	0.029412	0.242647	0.544118	0.772059	1	0.014706	0.220588	0.514706	0.779412	0.955882	0.007353	0.264706	0.404412	0.683824	0.926471	0.441176	0.191176	0.367647	0.051852	0.081481	0.022222	0.007353	0.220588	0.705882	0.830882	1	0.154412	0.191176	0.676471	0.889706	0.941176	0.029412	0.25	0.375	0.5	0.639706	0.433824	0.444444	0.051471	0.294118	0.514706	0.742647	0.926471	0.323529
0.366038	0.29434	0.339623	0.212121	0.280303	0.185606	0.007547	0.286792	0.554717	0.830189	0.996226	0.05283	0.207547	0.479245	0.675472	1	0.003774	0.241509	0.449057	0.686792	0.962264	0.498113	0.301887	0.2	0.109848	0.056818	0.003788	0.003774	0.241509	0.479245	0.728302	1	0.011321	0.154717	0.283019	0.501887	0.909434	0.354717	0.649057	0.769811	0.826415	0.958491	0.516981	0.340909	0.015094	0.233962	0.456604	0.675472	0.962264	0.324528
0.304286	0.492857	0.202857	0.263233	0.134478	0.180258	0.005714	0.288571	0.558571	0.781429	0.998571	0.004286	0.21	0.381429	0.618571	0.994286	0.001429	0.39	0.68	0.827143	1	0.728571	0.065714	0.205714	0.02289	0.048641	0.005722	0.001429	0.181429	0.364286	0.545714	1	0.651429	0.724286	0.812857	0.872857	0.924286	0.554286	0.634286	0.744286	0.911429	0.995714	0.277143	0.228898	0.002857	0.63	0.74	0.864286	0.995714	0.471429
0.293646	0.336829	0.369525	0.195062	0.214815	0.23642	0.001234	0.247378	0.511413	0.763726	0.999383	0.003701	0.188155	0.447872	0.711289	1	0.000617	0.291795	0.534238	0.758174	0.995682	0.328192	0.05182	0.619988	0.02037	0.108025	0.004321	0.000617	0.243677	0.509562	0.828501	1	0.122764	0.249229	0.715608	0.920419	0.978408	0.001234	0.254164	0.480568	0.712523	0.996299	0.579889	0.37037	0.001851	0.257249	0.487353	0.735349	0.995065	0.359655
0.320261	0.427015	0.252723	0.281659	0.172489	0.21179	0.008715	0.285403	0.529412	0.736383	0.991285	0.004357	0.222222	0.509804	0.729847	0.997821	0.002179	0.248366	0.431373	0.808279	1	0.69281	0.067538	0.239651	0.048035	0.052402	0.004367	0.002179	0.222222	0.507625	0.690632	1	0.061002	0.224401	0.446623	0.738562	0.910675	0.008715	0.320261	0.535948	0.91939	0.982571	0.418301	0.414847	0.013072	0.224401	0.427015	0.753813	0.989107	0.433551
0.307167	0.331058	0.361775	0.19863	0.205479	0.226027	0.006826	0.255973	0.501706	0.761092	0.982935	0.010239	0.232082	0.494881	0.709898	0.996587	0.003413	0.249147	0.484642	0.74744	1	0.399317	0.167235	0.433447	0.047945	0.10274	0	0.003413	0.177474	0.430034	0.696246	1	0.197952	0.358362	0.447099	0.641638	0.730375	0.051195	0.255973	0.532423	0.832765	0.993174	0.566553	0.390411	0.010239	0.228669	0.474403	0.665529	0.989761	0.334471
0.277978	0.415162	0.306859	0.210145	0.166667	0.257246	0.025271	0.202166	0.512635	0.758123	0.99639	0.00722	0.245487	0.458484	0.700361	1	0.00361	0.281588	0.505415	0.740072	0.99278	0.422383	0.169675	0.407942	0.050725	0.072464	0	0.00361	0.184116	0.429603	0.700361	1	0.216606	0.314079	0.447653	0.65343	0.743682	0.054152	0.270758	0.537906	0.833935	0.99278	0.541516	0.376812	0.061372	0.285199	0.490975	0.689531	0.99278	0.436823
0.364078	0.349515	0.286408	0.278049	0.180488	0.214634	0.009709	0.257282	0.480583	0.757282	0.990291	0.038835	0.237864	0.412621	0.68932	1	0.004854	0.18932	0.597087	0.786408	0.995146	0.504854	0.160194	0.334951	0.082927	0.063415	0.004878	0.004854	0.276699	0.402913	0.645631	1	0.009709	0.067961	0.597087	0.747573	0.941748	0.097087	0.203883	0.572816	0.796117	0.995146	0.509709	0.380488	0.014563	0.339806	0.529126	0.752427	0.995146	0.354369
0.345133	0.300885	0.353982	0.179601	0.241685	0.217295	0.004425	0.280973	0.539823	0.785398	0.995575	0.006637	0.227876	0.480088	0.761062	1	0.002212	0.232301	0.475664	0.696903	0.986726	0.35177	0.159292	0.488938	0.050998	0.086475	0.011086	0.002212	0.232301	0.480088	0.719027	1	0.097345	0.285398	0.460177	0.663717	0.774336	0.013274	0.221239	0.526549	0.814159	0.980088	0.550885	0.385809	0.00885	0.212389	0.422566	0.690265	0.986726	0.311947
0.394444	0.298148	0.307407	0.250464	0.261596	0.165121	0.003704	0.233333	0.501852	0.737037	0.998148	0.009259	0.322222	0.572222	0.848148	0.987037	0.001852	0.212963	0.438889	0.644444	1	0.405556	0.207407	0.387037	0.064935	0.068646	0.001855	0.001852	0.314815	0.590741	0.881481	1	0.094444	0.27963	0.374074	0.52963	0.944444	0.012963	0.216667	0.507407	0.709259	0.848148	0.446296	0.378479	0.009259	0.27037	0.464815	0.644444	0.994444	0.346296
0.385965	0.280702	0.333333	0.19469	0.238938	0.19469	0.04386	0.210526	0.491228	0.701754	1	0.026316	0.368421	0.614035	0.789474	0.991228	0.008772	0.175439	0.429825	0.710526	0.973684	0.385965	0.166667	0.447368	0.044248	0.097345	0.00885	0.008772	0.192982	0.350877	0.692982	1	0.263158	0.289474	0.394737	0.438596	0.745614	0.061404	0.447368	0.578947	0.859649	0.973684	0.429825	0.371681	0.035088	0.315789	0.535088	0.719298	0.973684	0.307018
0.395722	0.315508	0.28877	0.241935	0.268817	0.123656	0.010695	0.294118	0.55615	0.786096	1	0.026738	0.160428	0.395722	0.727273	0.962567	0.005348	0.235294	0.518717	0.705882	0.994652	0.411765	0.085561	0.502674	0.05914	0.080645	0.005376	0.005348	0.197861	0.44385	0.684492	1	0.139037	0.176471	0.299465	0.320856	0.989305	0.032086	0.374332	0.566845	0.775401	0.967914	0.411765	0.397849	0.02139	0.165775	0.385027	0.657754	0.983957	0.347594
0.333333	0.373984	0.292683	0.270492	0.172131	0.262295	0.02439	0.219512	0.422764	0.682927	0.99187	0.03252	0.243902	0.552846	0.780488	1	0.00813	0.317073	0.528455	0.764228	0.98374	0.235772	0	0.764228	0	0.081967	0	0.00813	0.056911	0.227642	0.715447	1	0	0	0	0	0	0.065041	0.300813	0.495935	0.764228	0.97561	0.430894	0.459016	0.03252	0.325203	0.528455	0.739837	0.95122	0.349593
0.34143	0.438596	0.219973	0.268919	0.154054	0.195946	0.005398	0.225371	0.445344	0.748988	1	0.002699	0.261808	0.550607	0.774629	0.99865	0.00135	0.249663	0.418354	0.665317	0.983806	0.775978	0.087719	0.136302	0.051351	0.043243	0.005405	0.00135	0.249663	0.560054	0.796221	1	0.010796	0.265857	0.368421	0.483131	0.883941	0.021592	0.237517	0.34413	0.59919	0.960864	0.360324	0.32973	0.009447	0.249663	0.431849	0.574899	0.974359	0.45614
0.327273	0.409091	0.263636	0.302752	0.155963	0.211009	0.036364	0.209091	0.472727	0.690909	0.990909	0.018182	0.236364	0.518182	0.718182	0.981818	0.009091	0.245455	0.454545	0.763636	1	0.490909	0.418182	0.090909	0.110092	0.036697	0	0.009091	0.218182	0.527273	0.736364	1	0.036364	0.127273	0.463636	0.690909	0.954545	0.327273	0.336364	0.363636	0.381818	0.872727	0.518182	0.256881	0.036364	0.236364	0.463636	0.745455	0.972727	0.345455
0.360294	0.25	0.389706	0.177778	0.251852	0.162963	0.036765	0.25	0.477941	0.735294	0.985294	0.051471	0.330882	0.514706	0.625	0.977941	0.007353	0.205882	0.404412	0.786765	1	0.595588	0.397059	0.007353	0.140741	0.007407	0.007407	0.007353	0.367647	0.544118	0.691176	1	0.014706	0.161765	0.316176	0.794118	0.992647	0.397059	0.397059	0.397059	0.397059	0.397059	0.536765	0.340741	0.014706	0.323529	0.558824	0.772059	0.977941	0.227941
0.351156	0.375723	0.273121	0.267728	0.193922	0.195369	0.007225	0.192197	0.482659	0.734104	1	0.00578	0.291908	0.566474	0.819364	0.995665	0.001445	0.236994	0.465318	0.682081	0.998555	0.526012	0.137283	0.336705	0.050651	0.070912	0.004342	0.001445	0.16474	0.49711	0.867052	1	0.021676	0.346821	0.50289	0.621387	0.859827	0.004335	0.313584	0.495665	0.74422	0.945087	0.473988	0.335745	0.004335	0.264451	0.465318	0.682081	0.99422	0.398844
0.31825	0.355958	0.325792	0.220544	0.225076	0.247734	0.003017	0.238311	0.503771	0.764706	1	0.004525	0.24736	0.508296	0.722474	0.998492	0.001508	0.260935	0.491704	0.761689	0.996983	0.422323	0.162896	0.414781	0.066465	0.075529	0.018127	0.001508	0.236802	0.506787	0.714932	1	0.007541	0.297134	0.473605	0.820513	0.996983	0.028658	0.257919	0.497738	0.740573	0.995475	0.558069	0.44713	0.007541	0.279035	0.502262	0.760181	0.996983	0.3454
0.343949	0.343949	0.312102	0.307692	0.198718	0.230769	0.012739	0.235669	0.477707	0.738854	1	0.076433	0.242038	0.452229	0.719745	0.993631	0.006369	0.184713	0.535032	0.726115	0.961783	0.630573	0.165605	0.203822	0.057692	0.044872	0.019231	0.006369	0.191083	0.350318	0.617834	1	0.019108	0.490446	0.764331	0.821656	0.974522	0.044586	0.541401	0.66242	0.88535	0.936306	0.414013	0.410256	0.019108	0.261146	0.414013	0.707006	0.968153	0.369427
0.41573	0.2397	0.344569	0.184211	0.255639	0.199248	0.007491	0.247191	0.516854	0.794007	1	0.018727	0.235955	0.531835	0.696629	0.996255	0.003745	0.243446	0.464419	0.715356	0.981273	0.374532	0.183521	0.441948	0.06015	0.097744	0	0.003745	0.157303	0.426966	0.692884	1	0.048689	0.292135	0.404494	0.621723	0.719101	0.018727	0.265918	0.520599	0.82397	0.992509	0.546816	0.398496	0.011236	0.228464	0.464419	0.674157	0.996255	0.265918
0.283537	0.60061	0.115854	0.30687	0.083969	0.122137	0.007622	0.329268	0.5625	0.786585	0.996951	0.003049	0.190549	0.39939	0.722561	1	0.001524	0.527439	0.632622	0.806402	0.978659	0.862805	0.04878	0.088415	0.025954	0.025954	0.001527	0.001524	0.269817	0.48628	0.772866	1	0.07622	0.551829	0.608232	0.635671	0.817073	0.012195	0.088415	0.170732	0.640244	0.990854	0.527439	0.332824	0.009146	0.344512	0.612805	0.818598	0.978659	0.58689
0.416404	0.343849	0.239748	0.262658	0.158228	0.199367	0.028391	0.277603	0.536278	0.760252	1	0.006309	0.201893	0.460568	0.769716	0.993691	0.003155	0.246057	0.44164	0.665615	0.921136	0.637224	0.135647	0.227129	0.056962	0.063291	0	0.003155	0.176656	0.495268	0.77918	1	0.15142	0.242902	0.353312	0.85489	0.940063	0.072555	0.328076	0.523659	0.624606	0.842271	0.274448	0.322785	0.044164	0.249211	0.378549	0.599369	0.917981	0.353312
0.404153	0.311502	0.284345	0.2256	0.2272	0.1904	0.003195	0.289137	0.485623	0.746006	1	0.004792	0.242812	0.541534	0.784345	0.998403	0.001597	0.194888	0.460064	0.677316	0.996805	0.560703	0.051118	0.388179	0.0384	0.0864	0.0064	0.001597	0.400958	0.565495	0.813099	1	0.100639	0.522364	0.714058	0.771565	0.950479	0.007987	0.134185	0.329073	0.635783	0.996805	0.365815	0.3936	0.01278	0.185304	0.482428	0.709265	0.996805	0.321086
0.40458	0.274809	0.320611	0.176923	0.238462	0.176923	0.022901	0.305344	0.473282	0.687023	0.954198	0.053435	0.221374	0.541985	0.80916	0.984733	0.007634	0.198473	0.381679	0.778626	1	0.343511	0.366412	0.290076	0.176923	0.053846	0.007692	0.007634	0.335878	0.564885	0.725191	1	0.175573	0.389313	0.549618	0.80916	0.992366	0.022901	0.083969	0.244275	0.312977	0.916031	0.458015	0.430769	0.030534	0.244275	0.557252	0.793893	0.992366	0.267176
0.333805	0.500707	0.165488	0.229462	0.135977	0.127479	0.004243	0.404526	0.643564	0.78925	0.998586	0.002829	0.190948	0.335219	0.635078	0.997171	0.001414	0.442716	0.571429	0.762376	1	0.677511	0.080622	0.241867	0.033994	0.028329	0	0.001414	0.171146	0.340877	0.644979	1	0.155587	0.463932	0.526167	0.585573	0.909477	0.359264	0.608204	0.725601	0.786421	0.862801	0.428571	0.271955	0.007072	0.356436	0.579915	0.865629	0.98727	0.489392
0.463158	0.305263	0.231579	0.287234	0.212766	0.138298	0.031579	0.178947	0.421053	0.631579	1	0.021053	0.4	0.642105	0.810526	0.989474	0.010526	0.252632	0.463158	0.694737	0.926316	0.2	0.010526	0.789474	0.021277	0.06383	0	0.010526	0.431579	0.694737	0.947368	1	0.705263	0.705263	0.705263	0.705263	0.705263	0.042105	0.221053	0.421053	0.652632	0.926316	0.273684	0.382979	0.042105	0.336842	0.568421	0.694737	0.926316	0.336842
0.328063	0.355731	0.316206	0.238095	0.202381	0.230159	0.01581	0.252964	0.466403	0.750988	1	0.011858	0.245059	0.549407	0.794466	0.988142	0.003953	0.217391	0.462451	0.699605	0.992095	0.312253	0.083004	0.604743	0.035714	0.115079	0.003968	0.003953	0.150198	0.462451	0.782609	1	0.201581	0.806324	0.857708	0.87747	0.909091	0.011858	0.27668	0.454545	0.648221	0.992095	0.529644	0.365079	0.007905	0.256917	0.438735	0.656126	0.992095	0.383399
0.334615	0.388462	0.276923	0.258687	0.220077	0.216216	0.057692	0.346154	0.553846	0.773077	0.996154	0.007692	0.203846	0.419231	0.707692	1	0.003846	0.219231	0.5	0.75	0.988462	0.526923	0.246154	0.226923	0.100386	0.061776	0	0.003846	0.223077	0.369231	0.680769	1	0.015385	0.434615	0.6	0.834615	0.992308	0.042308	0.134615	0.534615	0.769231	0.930769	0.403846	0.362934	0.011538	0.188462	0.496154	0.780769	0.988462	0.396154
0.372671	0.304348	0.322981	0.225	0.19375	0.25	0.018634	0.192547	0.42236	0.726708	1	0.012422	0.223602	0.496894	0.751553	0.987578	0.006211	0.279503	0.540373	0.745342	0.956522	0.428571	0.15528	0.416149	0.0625	0.0625	0	0.006211	0.130435	0.341615	0.677019	1	0.248447	0.279503	0.453416	0.490683	0.757764	0.024845	0.509317	0.614907	0.832298	0.937888	0.403727	0.425	0.031056	0.291925	0.540373	0.745342	0.956522	0.329193
0.2134	0.506203	0.280397	0.176617	0.121891	0.288557	0.012407	0.203474	0.406948	0.66005	0.990074	0.004963	0.28536	0.558313	0.801489	1	0.002481	0.218362	0.424318	0.669975	0.992556	0.585608	0.171216	0.243176	0.069652	0.049751	0	0.002481	0.295285	0.531017	0.801489	1	0.039702	0.129032	0.290323	0.615385	0.905707	0.096774	0.208437	0.419355	0.756824	0.985112	0.516129	0.378109	0.039702	0.28536	0.513648	0.813896	0.992556	0.513648
0.433566	0.272727	0.293706	0.221053	0.22807	0.192982	0.020979	0.318182	0.552448	0.786713	0.98951	0.006993	0.206294	0.409091	0.667832	0.996503	0.003497	0.234266	0.458042	0.723776	1	0.325175	0.048951	0.625874	0.021053	0.105263	0.007018	0.003497	0.20979	0.318182	0.583916	1	0.01049	0.045455	0.27972	0.912587	0.926573	0.020979	0.36014	0.56993	0.783217	0.98951	0.409091	0.42807	0.01049	0.255245	0.51049	0.755245	0.972028	0.304196
0.377203	0.359577	0.26322	0.289412	0.196471	0.188235	0.003525	0.303173	0.589894	0.804935	1	0.00235	0.19624	0.473561	0.772033	0.998825	0.001175	0.245593	0.427732	0.626322	0.992949	0.475911	0.115159	0.408931	0.048235	0.092941	0.005882	0.001175	0.26322	0.59577	0.835488	1	0.042303	0.229142	0.346651	0.459459	0.811986	0.024677	0.251469	0.502938	0.668625	0.943596	0.413631	0.329412	0.0047	0.20564	0.379553	0.596945	0.992949	0.374853
0.367021	0.295745	0.337234	0.216187	0.242812	0.201278	0.004255	0.224468	0.521277	0.75	1	0.002128	0.256383	0.457447	0.744681	0.998936	0.001064	0.265957	0.502128	0.746809	0.997872	0.380851	0.148936	0.470213	0.055378	0.080937	0.00213	0.001064	0.255319	0.524468	0.820213	1	0.12234	0.362766	0.706383	0.889362	0.970213	0.003191	0.157447	0.457447	0.632979	0.991489	0.510638	0.396166	0.005319	0.269149	0.478723	0.746809	0.997872	0.338298
0.365957	0.310638	0.323404	0.25641	0.24359	0.188034	0.017021	0.246809	0.493617	0.719149	1	0.008511	0.161702	0.52766	0.761702	0.995745	0.004255	0.276596	0.485106	0.73617	0.991489	0.489362	0.374468	0.13617	0.145299	0.042735	0	0.004255	0.148936	0.53617	0.770213	1	0.089362	0.417021	0.595745	0.795745	0.970213	0.017021	0.165957	0.2	0.242553	0.485106	0.523404	0.376068	0.012766	0.255319	0.510638	0.744681	0.991489	0.32766
0.292135	0.5	0.207865	0.305085	0.101695	0.186441	0.02809	0.207865	0.426966	0.702247	0.91573	0.011236	0.292135	0.61236	0.831461	1	0.005618	0.11236	0.41573	0.533708	0.97191	0.752809	0.146067	0.101124	0.084746	0.039548	0.016949	0.005618	0.258427	0.55618	0.775281	1	0.314607	0.393258	0.5	0.601124	0.876404	0.039326	0.05618	0.089888	0.11236	0.842697	0.38764	0.293785	0.022472	0.325843	0.494382	0.735955	0.97191	0.516854
0.391304	0.452899	0.155797	0.345455	0.138182	0.112727	0.014493	0.300725	0.532609	0.771739	1	0.025362	0.228261	0.518116	0.710145	0.996377	0.003623	0.130435	0.333333	0.706522	0.923913	0.717391	0.050725	0.231884	0.021818	0.058182	0	0.003623	0.246377	0.48913	0.666667	1	0.032609	0.039855	0.108696	0.315217	0.32971	0.130435	0.365942	0.728261	0.844203	0.92029	0.23913	0.370909	0.01087	0.221014	0.525362	0.778986	0.985507	0.463768
0.347239	0.309202	0.343558	0.197789	0.275184	0.224816	0.002454	0.257669	0.51411	0.768098	1	0.004908	0.242945	0.450307	0.744785	0.996319	0.001227	0.239264	0.506748	0.733742	0.997546	0.480982	0.226994	0.292025	0.092138	0.052826	0.003686	0.001227	0.225767	0.426994	0.732515	1	0.038037	0.251534	0.43681	0.801227	0.997546	0.006135	0.310429	0.581595	0.711656	0.992638	0.557055	0.385749	0.003681	0.262577	0.48589	0.743558	0.997546	0.331288
0.367089	0.388186	0.244726	0.317797	0.211864	0.190678	0.008439	0.257384	0.531646	0.797468	1	0.016878	0.303797	0.535865	0.78903	0.974684	0.004219	0.130802	0.337553	0.582278	0.991561	0.71308	0.177215	0.109705	0.076271	0.016949	0.008475	0.004219	0.438819	0.624473	0.801688	1	0.029536	0.126582	0.270042	0.35443	0.945148	0.012658	0.063291	0.092827	0.172996	0.202532	0.168776	0.186441	0.012658	0.084388	0.202532	0.341772	0.7173	0.392405
0.396117	0.378641	0.225243	0.287938	0.169261	0.182879	0.01165	0.314563	0.537864	0.776699	1	0.003883	0.24466	0.473786	0.700971	0.990291	0.001942	0.194175	0.421359	0.753398	0.992233	0.737864	0.102913	0.159223	0.038911	0.027237	0.007782	0.001942	0.357282	0.541748	0.726214	1	0.052427	0.159223	0.223301	0.291262	0.968932	0.009709	0.124272	0.174757	0.848544	0.91068	0.221359	0.206226	0.005825	0.11068	0.219417	0.718447	0.968932	0.392233
0.42542	0.383403	0.191176	0.304942	0.171399	0.117771	0.003151	0.257353	0.490546	0.727941	1	0.002101	0.189076	0.442227	0.726891	0.995798	0.00105	0.387605	0.644958	0.790966	0.992647	0.744748	0.005252	0.25	0.004206	0.052576	0	0.00105	0.203782	0.391807	0.598739	1	0.084034	0.084034	0.085084	0.504202	0.506303	0.012605	0.656513	0.752101	0.828782	0.991597	0.281513	0.271293	0.039916	0.481092	0.671218	0.82563	0.992647	0.401261
0.412791	0.319767	0.267442	0.233918	0.210526	0.204678	0.017442	0.296512	0.494186	0.755814	0.994186	0.011628	0.22093	0.569767	0.819767	1	0.005814	0.174419	0.401163	0.593023	0.848837	0.517442	0.075581	0.406977	0.035088	0.105263	0	0.005814	0.325581	0.540698	0.77907	1	0.133721	0.145349	0.162791	0.180233	0.837209	0.023256	0.238372	0.395349	0.645349	0.947674	0.389535	0.362573	0.040698	0.174419	0.383721	0.610465	0.848837	0.331395
0.352181	0.318255	0.329564	0.223301	0.221683	0.197411	0.008078	0.232633	0.516963	0.77706	1	0.006462	0.197092	0.439418	0.736672	0.996769	0.001616	0.311793	0.53958	0.731826	0.983845	0.49273	0.163166	0.344103	0.063107	0.079288	0.004854	0.001616	0.159935	0.336026	0.647819	1	0.009693	0.308562	0.568659	0.728595	0.886914	0.077544	0.415186	0.599354	0.817447	0.995153	0.508885	0.355987	0.009693	0.345719	0.523425	0.731826	0.988691	0.360258
0.380952	0.306122	0.312925	0.19863	0.239726	0.191781	0.013605	0.340136	0.591837	0.829932	0.972789	0.054422	0.190476	0.401361	0.659864	1	0.006803	0.210884	0.469388	0.70068	0.952381	0.37415	0.312925	0.312925	0.089041	0.047945	0.034247	0.006803	0.251701	0.435374	0.659864	1	0.020408	0.163265	0.367347	0.707483	0.809524	0.027211	0.52381	0.612245	0.897959	0.979592	0.455782	0.369863	0.027211	0.210884	0.408163	0.680272	0.979592	0.272109
0.386207	0.324138	0.289655	0.298611	0.1875	0.229167	0.034483	0.289655	0.462069	0.703448	0.986207	0.013793	0.241379	0.517241	0.751724	0.993103	0.006897	0.151724	0.434483	0.724138	1	0.462069	0.144828	0.393103	0.097222	0.083333	0.013889	0.006897	0.234483	0.510345	0.772414	1	0.068966	0.117241	0.268966	0.703448	0.903448	0.131034	0.289655	0.427586	0.655172	0.958621	0.42069	0.333333	0.062069	0.17931	0.372414	0.696552	0.972414	0.372414
0.378738	0.285714	0.335548	0.22	0.223333	0.18	0.006645	0.302326	0.601329	0.797342	1	0.009967	0.182724	0.405316	0.611296	0.983389	0.003322	0.249169	0.495017	0.717608	0.980066	0.418605	0.229236	0.352159	0.08	0.066667	0	0.003322	0.189369	0.481728	0.69103	1	0.013289	0.162791	0.398671	0.747508	0.923588	0.059801	0.352159	0.551495	0.807309	0.963455	0.55814	0.346667	0.016611	0.219269	0.45515	0.707641	0.976744	0.292359
0.409722	0.194444	0.395833	0.160839	0.307692	0.202797	0.013889	0.236111	0.458333	0.756944	1	0.048611	0.291667	0.548611	0.791667	0.979167	0.006944	0.215278	0.472222	0.673611	0.986111	0.361111	0.298611	0.340278	0.118881	0.076923	0.006993	0.006944	0.222222	0.451389	0.6875	1	0.041667	0.277778	0.5	0.722222	0.993056	0.069444	0.145833	0.534722	0.791667	0.909722	0.513889	0.48951	0.020833	0.215278	0.486111	0.729167	0.986111	0.201389
0.369034	0.441211	0.189756	0.257576	0.160839	0.131702	0.002328	0.202561	0.474971	0.696158	1	0.022119	0.291036	0.596042	0.85099	0.998836	0.001164	0.257276	0.423749	0.569267	0.973225	0.683353	0.126892	0.189756	0.052448	0.054779	0.003497	0.001164	0.252619	0.54482	0.827707	1	0.005821	0.301513	0.383003	0.445867	0.677532	0.004657	0.182771	0.537835	0.625146	0.963912	0.427241	0.328671	0.003492	0.307334	0.493597	0.718277	0.995343	0.434226
0.432668	0.329177	0.238155	0.27965	0.217228	0.147316	0.003741	0.235661	0.485037	0.761845	0.998753	0.002494	0.274314	0.493766	0.729426	0.997506	0.001247	0.244389	0.514963	0.778055	1	0.451372	0.01995	0.528678	0.012484	0.077403	0	0.001247	0.253117	0.445137	0.605985	1	0.498753	0.502494	0.612219	0.765586	0.84414	0.016209	0.233167	0.637157	0.865337	0.997506	0.361596	0.401998	0.007481	0.279302	0.528678	0.784289	0.995012	0.342893
0.307359	0.385281	0.307359	0.234783	0.213043	0.226087	0.008658	0.268398	0.493506	0.722944	1	0.012987	0.21645	0.47619	0.800866	0.987013	0.004329	0.229437	0.489177	0.69697	0.995671	0.337662	0.095238	0.5671	0.034783	0.104348	0	0.004329	0.116883	0.406926	0.692641	1	0.398268	0.78355	0.835498	0.857143	0.891775	0.051948	0.272727	0.467532	0.614719	0.978355	0.493506	0.330435	0.025974	0.21645	0.47619	0.688312	0.991342	0.385281
0.417112	0.352941	0.229947	0.311828	0.182796	0.123656	0.032086	0.304813	0.550802	0.786096	0.994652	0.010695	0.251337	0.55615	0.759358	1	0.005348	0.176471	0.326203	0.545455	0.893048	0.347594	0.342246	0.31016	0.129032	0.021505	0	0.005348	0.240642	0.427807	0.572193	1	0.010695	0.117647	0.256684	0.406417	0.625668	0.657754	0.727273	0.823529	0.898396	0.97861	0.31016	0.430108	0.010695	0.203209	0.385027	0.604278	0.909091	0.358289
0.446809	0.333333	0.219858	0.307143	0.157143	0.164286	0.014184	0.184397	0.475177	0.758865	1	0.021277	0.319149	0.588652	0.801418	0.992908	0.007092	0.134752	0.404255	0.659574	0.978723	0.48227	0.134752	0.382979	0.042857	0.1	0	0.007092	0.269504	0.439716	0.851064	1	0.205674	0.22695	0.375887	0.411348	0.680851	0.028369	0.134752	0.539007	0.765957	0.879433	0.404255	0.285714	0.06383	0.361702	0.489362	0.666667	0.964539	0.347518
0.441727	0.305036	0.253237	0.255043	0.197406	0.184438	0.002878	0.283453	0.507914	0.720863	0.998561	0.008633	0.233094	0.494964	0.753957	1	0.001439	0.227338	0.446043	0.795683	0.994245	0.397122	0.047482	0.555396	0.023055	0.083573	0.002882	0.001439	0.146763	0.381295	0.765468	1	0.03741	0.08777	0.241727	0.264748	0.805755	0.010072	0.382734	0.568345	0.72518	0.995683	0.353957	0.377522	0.015827	0.221583	0.42446	0.743885	0.992806	0.320863
0.355	0.32	0.325	0.221106	0.251256	0.226131	0.01	0.19	0.425	0.67	0.985	0.015	0.215	0.525	0.78	1	0.005	0.31	0.535	0.75	0.945	0.45	0.445	0.105	0.130653	0.030151	0	0.005	0.29	0.59	0.835	1	0.015	0.315	0.495	0.67	0.92	0.085	0.105	0.235	0.26	0.705	0.445	0.462312	0.02	0.25	0.475	0.71	0.94	0.375
0.345196	0.405694	0.24911	0.282143	0.167857	0.207143	0.017794	0.263345	0.508897	0.864769	0.996441	0.010676	0.298932	0.572954	0.743772	1	0.003559	0.185053	0.409253	0.569395	0.967972	0.683274	0.120996	0.19573	0.064286	0.071429	0	0.003559	0.362989	0.565836	0.765125	1	0.039146	0.135231	0.19573	0.298932	0.822064	0.081851	0.227758	0.341637	0.857651	0.975089	0.430605	0.342857	0.035587	0.202847	0.476868	0.604982	0.967972	0.380783
0.440217	0.375	0.184783	0.305177	0.158038	0.119891	0.01087	0.195652	0.527174	0.758152	0.994565	0.005435	0.252717	0.429348	0.638587	0.991848	0.002717	0.413043	0.589674	0.766304	1	0.48913	0.070652	0.440217	0.038147	0.087193	0	0.002717	0.163043	0.334239	0.61413	1	0.105978	0.402174	0.486413	0.565217	0.951087	0.016304	0.38587	0.660326	0.782609	0.997283	0.258152	0.294278	0.024457	0.415761	0.565217	0.722826	0.98913	0.4375
0.388679	0.260377	0.350943	0.185606	0.333333	0.17803	0.007547	0.275472	0.490566	0.762264	1	0.033962	0.192453	0.543396	0.792453	0.973585	0.003774	0.25283	0.467925	0.690566	0.992453	0.309434	0.264151	0.426415	0.068182	0.060606	0.007576	0.003774	0.132075	0.498113	0.713208	1	0.05283	0.14717	0.29434	0.807547	0.988679	0.166038	0.396226	0.520755	0.739623	0.954717	0.475472	0.469697	0.011321	0.245283	0.509434	0.732075	0.981132	0.25283
0.315789	0.368421	0.315789	0.166667	0.204545	0.212121	0.015038	0.225564	0.503759	0.789474	1	0.022556	0.285714	0.473684	0.729323	0.992481	0.007519	0.210526	0.511278	0.699248	0.984962	0.368421	0.240602	0.390977	0.068182	0.083333	0.007576	0.007519	0.270677	0.451128	0.87218	1	0.052632	0.293233	0.390977	0.488722	0.714286	0.142857	0.233083	0.601504	0.789474	0.962406	0.413534	0.393939	0.030075	0.18797	0.413534	0.616541	0.857143	0.360902
0.365385	0.326923	0.307692	0.223301	0.281553	0.194175	0.019231	0.240385	0.480769	0.711538	0.990385	0.086538	0.25	0.567308	0.778846	1	0.009615	0.182692	0.461538	0.692308	0.961538	0.413462	0.298077	0.288462	0.106796	0.048544	0.009709	0.009615	0.288462	0.663462	0.798077	1	0.115385	0.365385	0.625	0.836538	0.961538	0.028846	0.144231	0.221154	0.461538	0.538462	0.346154	0.38835	0.028846	0.153846	0.413462	0.625	0.961538	0.336538
0.304553	0.414443	0.281005	0.215409	0.168239	0.254717	0.006279	0.194662	0.4427	0.816327	0.99529	0.00314	0.262166	0.511774	0.682889	1	0.00157	0.260597	0.510204	0.77865	0.99686	0.637363	0.139717	0.22292	0.06761	0.064465	0.001572	0.00157	0.21978	0.527473	0.693878	1	0.100471	0.277865	0.425432	0.850863	0.981162	0.023548	0.232339	0.44898	0.77865	0.956044	0.544741	0.279874	0.015699	0.362637	0.583987	0.728414	0.99686	0.437991
0.313953	0.313123	0.372924	0.203658	0.226933	0.237739	0.003322	0.215116	0.497508	0.769103	0.999169	0.001661	0.288206	0.503322	0.753322	1	0.000831	0.240033	0.486711	0.740864	0.998339	0.297342	0.017442	0.685216	0.009144	0.103907	0.002494	0.000831	0.320598	0.581395	0.789867	1	0.408638	0.608804	0.83804	0.973422	0.997508	0.002492	0.213455	0.464286	0.726744	0.9701	0.604651	0.36409	0.002492	0.262458	0.475914	0.723422	0.998339	0.354651
0.28363	0.458671	0.257699	0.23539	0.167208	0.211039	0.003241	0.333874	0.549433	0.764992	0.983793	0.004862	0.19611	0.439222	0.748784	1	0.001621	0.28363	0.487844	0.71799	0.996759	0.675851	0.111831	0.212318	0.053571	0.056818	0.001623	0.001621	0.212318	0.453809	0.753647	1	0.037277	0.371151	0.539708	0.692058	0.952998	0.004862	0.23987	0.555916	0.779579	0.983793	0.452188	0.36039	0.008104	0.215559	0.491086	0.740681	0.990276	0.442464
0.338028	0.352113	0.309859	0.240566	0.25	0.245283	0.023474	0.258216	0.488263	0.807512	0.985915	0.014085	0.267606	0.507042	0.760563	1	0.004695	0.192488	0.469484	0.694836	0.995305	0.464789	0.375587	0.159624	0.160377	0.018868	0	0.004695	0.169014	0.422535	0.802817	1	0.065728	0.248826	0.389671	0.694836	0.971831	0.441315	0.474178	0.516432	0.821596	0.86385	0.474178	0.490566	0.018779	0.183099	0.492958	0.666667	0.957746	0.361502
0.403846	0.317308	0.278846	0.262136	0.184466	0.223301	0.086538	0.230769	0.509615	0.759615	0.932692	0.019231	0.240385	0.461538	0.711538	0.990385	0.009615	0.201923	0.471154	0.692308	1	0.413462	0.586538	0	0.174757	0	0	0.009615	0.278846	0.528846	0.778846	1	0.019231	0.201923	0.403846	0.701923	0.990385	0	0	0	0	0	0.384615	0.504854	0.019231	0.211538	0.471154	0.701923	0.971154	0.278846
0.40717	0.348271	0.244558	0.269231	0.167949	0.174359	0.002561	0.201024	0.448143	0.727273	1	0.010243	0.266325	0.550576	0.763124	0.997439	0.00128	0.307298	0.548015	0.741357	0.99872	0.545455	0.12548	0.329065	0.042308	0.085897	0.003846	0.00128	0.158771	0.446863	0.792574	1	0.215109	0.444302	0.596671	0.704225	0.841229	0.003841	0.321383	0.498079	0.71959	0.994878	0.4379	0.305128	0.003841	0.317542	0.504481	0.705506	0.994878	0.389245
0.375839	0.328859	0.295302	0.290541	0.243243	0.168919	0.013423	0.241611	0.496644	0.751678	1	0.033557	0.214765	0.510067	0.738255	0.966443	0.006711	0.255034	0.463087	0.724832	0.986577	0.469799	0.530201	0	0.175676	0	0	0.006711	0.208054	0.436242	0.711409	1	0.053691	0.302013	0.52349	0.751678	0.986577	0	0	0	0	0	0.395973	0.337838	0.040268	0.362416	0.557047	0.751678	0.986577	0.328859
0.301587	0.465608	0.232804	0.245583	0.130742	0.242049	0.003527	0.243386	0.530864	0.763668	1	0.005291	0.229277	0.446208	0.744268	0.998236	0.001764	0.326279	0.552028	0.723104	0.957672	0.679012	0.119929	0.201058	0.060071	0.053004	0	0.001764	0.296296	0.479718	0.797178	1	0.008818	0.522046	0.601411	0.723104	0.809524	0.012346	0.223986	0.287478	0.700176	0.885362	0.573192	0.279152	0.007055	0.291005	0.481481	0.768959	0.987654	0.433862
0.39375	0.35	0.25625	0.201258	0.213836	0.150943	0.04375	0.26875	0.53125	0.73125	0.9875	0.0125	0.2	0.45	0.76875	0.94375	0.00625	0.2375	0.3875	0.66875	1	0.5625	0.13125	0.30625	0.08805	0.100629	0.012579	0.00625	0.2125	0.45	0.725	1	0.1	0.25625	0.50625	0.89375	0.95	0.025	0.30625	0.6375	0.7875	0.99375	0.375	0.415094	0.01875	0.25	0.475	0.66875	0.98125	0.35625
0.344086	0.392473	0.263441	0.286486	0.189189	0.205405	0.010753	0.241935	0.5	0.790323	0.994624	0.021505	0.172043	0.397849	0.704301	1	0.005376	0.349462	0.516129	0.698925	0.989247	0.580645	0.155914	0.263441	0.054054	0.064865	0.021622	0.005376	0.155914	0.317204	0.623656	1	0.096774	0.413978	0.645161	0.682796	0.967742	0.016129	0.456989	0.688172	0.752688	0.930108	0.403226	0.421622	0.016129	0.274194	0.456989	0.72043	0.951613	0.38172
0.425508	0.314898	0.259594	0.263277	0.219209	0.170621	0.003386	0.251693	0.475169	0.725734	1	0.002257	0.256208	0.484199	0.730248	0.993228	0.001129	0.23702	0.571106	0.786682	0.998871	0.565463	0.164786	0.269752	0.077966	0.066667	0.014689	0.001129	0.209932	0.392777	0.642212	1	0.009029	0.247178	0.651242	0.839729	0.962754	0.022573	0.469526	0.626411	0.77991	0.997743	0.457111	0.433898	0.009029	0.27088	0.566591	0.758465	0.992099	0.323928
0.363636	0.290909	0.345455	0.259259	0.314815	0.222222	0.036364	0.272727	0.490909	0.745455	1	0.145455	0.254545	0.527273	0.690909	0.890909	0.018182	0.109091	0.418182	0.781818	0.963636	0.418182	0.236364	0.345455	0.092593	0.074074	0	0.109091	0.181818	0.472727	0.654545	1	0.018182	0.054545	0.563636	0.618182	0.981818	0.254545	0.309091	0.4	0.745455	0.836364	0.327273	0.444444	0.054545	0.290909	0.454545	0.8	0.963636	0.309091
0.445652	0.206522	0.347826	0.175824	0.318681	0.153846	0.021739	0.206522	0.5	0.76087	1	0.119565	0.326087	0.554348	0.684783	0.891304	0.01087	0.195652	0.413043	0.73913	0.956522	0.423913	0.521739	0.054348	0.10989	0.021978	0.021978	0.01087	0.26087	0.48913	0.717391	1	0.065217	0.336957	0.521739	0.771739	0.978261	0.054348	0.054348	0.086957	0.097826	0.119565	0.369565	0.505495	0.065217	0.26087	0.478261	0.728261	0.967391	0.195652
0.307971	0.362319	0.32971	0.210909	0.221818	0.210909	0.021739	0.26087	0.518116	0.768116	1	0.007246	0.221014	0.42029	0.721014	0.996377	0.003623	0.289855	0.51087	0.742754	0.98913	0.460145	0.257246	0.282609	0.087273	0.058182	0	0.003623	0.242754	0.423913	0.677536	1	0.123188	0.221014	0.5	0.721014	0.858696	0.007246	0.380435	0.561594	0.913043	0.985507	0.550725	0.356364	0.014493	0.304348	0.528986	0.742754	0.98913	0.427536
0.328571	0.414286	0.257143	0.323741	0.165468	0.201439	0.021429	0.221429	0.428571	0.728571	0.992857	0.014286	0.264286	0.542857	0.821429	1	0.007143	0.228571	0.464286	0.635714	0.957143	0.4	0.228571	0.371429	0.064748	0.079137	0.007194	0.007143	0.314286	0.6	0.864286	1	0.042857	0.092857	0.371429	0.464286	0.678571	0.135714	0.221429	0.571429	0.757143	0.971429	0.421429	0.388489	0.028571	0.207143	0.45	0.621429	0.964286	0.407143
0.330855	0.360595	0.30855	0.208955	0.208955	0.227612	0.01487	0.178439	0.431227	0.70632	0.992565	0.007435	0.297398	0.546468	0.810409	1	0.003717	0.260223	0.505576	0.69145	0.98513	0.457249	0.200743	0.342007	0.093284	0.070896	0.011194	0.003717	0.289963	0.505576	0.851301	1	0.122677	0.315985	0.486989	0.672862	0.907063	0.011152	0.104089	0.449814	0.713755	0.914498	0.531599	0.395522	0.02974	0.315985	0.498141	0.69145	0.98513	0.405204
0.357143	0.326531	0.316327	0.309278	0.226804	0.216495	0.05102	0.244898	0.489796	0.714286	0.979592	0.030612	0.326531	0.561224	0.806122	1	0.010204	0.112245	0.316327	0.693878	0.989796	0.530612	0.469388	0	0.123711	0	0	0.010204	0.142857	0.367347	0.714286	1	0.102041	0.387755	0.571429	0.795918	0.989796	0	0	0	0	0	0.428571	0.43299	0.040816	0.132653	0.397959	0.653061	0.959184	0.27551
0.408163	0.251701	0.340136	0.239726	0.287671	0.157534	0.013605	0.285714	0.47619	0.707483	1	0.068027	0.176871	0.469388	0.721088	0.993197	0.006803	0.204082	0.517007	0.768707	0.972789	0.367347	0.29932	0.333333	0.109589	0.068493	0.013699	0.006803	0.14966	0.510204	0.741497	1	0.013605	0.244898	0.619048	0.891156	0.986395	0.061224	0.326531	0.408163	0.489796	0.816327	0.380952	0.452055	0.020408	0.204082	0.537415	0.727891	0.972789	0.278912
0.349425	0.331034	0.31954	0.214039	0.242808	0.218642	0.002299	0.26092	0.512644	0.742529	1	0.004598	0.231034	0.5	0.758621	0.996552	0.001149	0.235632	0.482759	0.74023	0.997701	0.488506	0.226437	0.285057	0.097814	0.058688	0.003452	0.001149	0.217241	0.473563	0.732184	1	0.035632	0.248276	0.48046	0.808046	0.997701	0.005747	0.296552	0.578161	0.728736	0.993103	0.544828	0.393556	0.003448	0.250575	0.465517	0.748276	0.997701	0.364368
0.37051	0.321361	0.308129	0.210227	0.263258	0.193182	0.005671	0.272212	0.533081	0.754253	0.996219	0.003781	0.258979	0.489603	0.727788	1	0.00189	0.20794	0.47259	0.746692	0.99811	0.451796	0.177694	0.37051	0.087121	0.081439	0.001894	0.00189	0.336484	0.534972	0.786389	0.994329	0.069943	0.440454	0.759924	0.858223	1	0.013233	0.181474	0.325142	0.565217	0.931947	0.531191	0.390152	0.009452	0.221172	0.406427	0.708885	0.99811	0.342155
0.385629	0.337725	0.276647	0.272182	0.201439	0.183453	0.003593	0.235928	0.51497	0.776048	1	0.002395	0.273054	0.535329	0.760479	0.998802	0.001198	0.233533	0.432335	0.674251	0.972455	0.486228	0.203593	0.31018	0.07554	0.063549	0.003597	0.001198	0.247904	0.523353	0.832335	1	0.086228	0.202395	0.427545	0.790419	0.877844	0.010778	0.300599	0.51497	0.693413	0.958084	0.474251	0.338129	0.005988	0.25988	0.456287	0.673054	0.966467	0.354491
0.368715	0.340782	0.290503	0.247191	0.207865	0.202247	0.011173	0.24581	0.458101	0.748603	1	0.072626	0.307263	0.486034	0.765363	0.994413	0.005587	0.173184	0.502793	0.72067	0.98324	0.402235	0.256983	0.340782	0.106742	0.073034	0.005618	0.005587	0.184358	0.603352	0.899441	1	0.011173	0.201117	0.50838	0.726257	0.810056	0.050279	0.27933	0.363128	0.564246	0.888268	0.351955	0.438202	0.01676	0.173184	0.497207	0.687151	0.972067	0.340782
0.355422	0.36747	0.277108	0.269618	0.191147	0.181087	0.008032	0.2249	0.463855	0.753012	1	0.004016	0.263052	0.528112	0.769076	0.995984	0.002008	0.2751	0.516064	0.706827	0.981928	0.48996	0.160643	0.349398	0.078471	0.074447	0.01006	0.002008	0.251004	0.568273	0.807229	1	0.046185	0.192771	0.626506	0.773092	0.935743	0.02008	0.2751	0.445783	0.610442	0.993976	0.600402	0.321932	0.02008	0.285141	0.508032	0.706827	0.995984	0.381526
0.330909	0.334545	0.334545	0.19708	0.229927	0.226277	0.010909	0.247273	0.501818	0.763636	1	0.007273	0.236364	0.487273	0.741818	0.970909	0.003636	0.265455	0.494545	0.723636	0.985455	0.370909	0.178182	0.450909	0.051095	0.10219	0	0.003636	0.181818	0.458182	0.705455	1	0.152727	0.305455	0.392727	0.603636	0.698182	0.007273	0.261818	0.509091	0.818182	0.992727	0.541818	0.394161	0.018182	0.247273	0.469091	0.669091	0.985455	0.341818
0.370618	0.325543	0.30384	0.214047	0.217391	0.198997	0.003339	0.203673	0.479132	0.752922	0.998331	0.006678	0.257095	0.467446	0.741235	1	0.001669	0.308848	0.529215	0.732888	0.993322	0.435726	0.153589	0.410684	0.056856	0.090301	0.006689	0.001669	0.15025	0.355593	0.687813	1	0.026711	0.400668	0.589316	0.737896	0.861436	0.005008	0.327212	0.542571	0.786311	0.994992	0.482471	0.327759	0.005008	0.350584	0.524207	0.734558	0.993322	0.348915
0.37469	0.26799	0.35732	0.18408	0.261194	0.208955	0.004963	0.253102	0.533499	0.784119	1	0.009926	0.176179	0.387097	0.674938	0.997519	0.002481	0.317618	0.516129	0.761787	0.995037	0.352357	0.094293	0.55335	0.039801	0.109453	0.004975	0.002481	0.203474	0.531017	0.746898	1	0.004963	0.064516	0.148883	0.233251	0.305211	0.019851	0.364764	0.573201	0.791563	0.992556	0.593052	0.393035	0.007444	0.243176	0.466501	0.707196	0.980149	0.255583
0.409253	0.323843	0.266904	0.253571	0.257143	0.139286	0.010676	0.241993	0.512456	0.740214	1	0.007117	0.217082	0.441281	0.765125	0.992883	0.003559	0.284698	0.494662	0.72242	0.975089	0.537367	0.117438	0.345196	0.039286	0.053571	0.010714	0.003559	0.330961	0.466192	0.754448	1	0.02847	0.078292	0.615658	0.669039	0.797153	0.081851	0.181495	0.320285	0.743772	0.950178	0.44484	0.428571	0.017794	0.288256	0.508897	0.743772	0.975089	0.359431
0.304054	0.459459	0.236486	0.340136	0.142857	0.204082	0.013514	0.202703	0.445946	0.682432	1	0.02027	0.27027	0.581081	0.831081	0.993243	0.006757	0.243243	0.459459	0.614865	0.932432	0.533784	0.121622	0.344595	0.034014	0.061224	0.006803	0.006757	0.202703	0.628378	0.864865	1	0.243243	0.263514	0.344595	0.371622	0.621622	0.087838	0.378378	0.47973	0.689189	0.777027	0.405405	0.312925	0.047297	0.324324	0.459459	0.614865	0.898649	0.493243
0.42953	0.278523	0.291946	0.23569	0.272727	0.16835	0.02349	0.308725	0.533557	0.704698	1	0.006711	0.167785	0.385906	0.788591	0.996644	0.003356	0.218121	0.489933	0.771812	0.993289	0.45302	0.137584	0.409396	0.070707	0.077441	0.003367	0.003356	0.177852	0.446309	0.731544	1	0.010067	0.211409	0.768456	0.88255	0.993289	0.053691	0.302013	0.5	0.61745	0.942953	0.426174	0.383838	0.013423	0.211409	0.40604	0.778523	0.993289	0.281879
0.303644	0.4278	0.268556	0.262162	0.167568	0.228378	0.002699	0.218623	0.495277	0.723347	0.993252	0.013495	0.246964	0.483131	0.734143	1	0.00135	0.299595	0.516869	0.77193	0.997301	0.618084	0.132254	0.249663	0.052703	0.05	0.001351	0.00135	0.224022	0.461538	0.695007	1	0.126856	0.357625	0.573549	0.746289	0.881242	0.008097	0.379217	0.541161	0.898785	0.991903	0.475034	0.337838	0.012146	0.358974	0.593792	0.77193	0.997301	0.437247
0.313589	0.397213	0.289199	0.223776	0.178322	0.244755	0.038328	0.229965	0.41115	0.783972	1	0.006969	0.292683	0.526132	0.686411	0.993031	0.003484	0.191638	0.508711	0.790941	0.989547	0.606272	0.188153	0.205575	0.083916	0.048951	0	0.003484	0.355401	0.529617	0.679443	1	0.010453	0.170732	0.313589	0.853659	0.993031	0.101045	0.146341	0.348432	0.804878	0.937282	0.439024	0.405594	0.010453	0.212544	0.522648	0.763066	0.993031	0.390244
0.34058	0.362319	0.297101	0.243194	0.210526	0.219601	0.005435	0.255435	0.536232	0.797101	0.996377	0.003623	0.28442	0.528986	0.778986	1	0.001812	0.184783	0.427536	0.630435	0.992754	0.467391	0.063406	0.469203	0.019964	0.07804	0.005445	0.001812	0.26087	0.641304	0.824275	1	0.056159	0.068841	0.186594	0.373188	0.615942	0.005435	0.29529	0.461957	0.652174	0.994565	0.496377	0.315789	0.007246	0.217391	0.45471	0.625	0.992754	0.418478
0.341176	0.382353	0.276471	0.248521	0.236686	0.218935	0.023529	0.276471	0.582353	0.841176	0.994118	0.011765	0.170588	0.441176	0.705882	1	0.005882	0.205882	0.411765	0.7	0.970588	0.376471	0.170588	0.452941	0.059172	0.08284	0	0.005882	0.141176	0.364706	0.582353	1	0.023529	0.058824	0.335294	0.4	0.805882	0.135294	0.441176	0.688235	0.852941	0.988235	0.417647	0.508876	0.029412	0.229412	0.441176	0.717647	0.970588	0.417647
0.333333	0.312684	0.353982	0.213018	0.236686	0.224852	0.00885	0.250737	0.533923	0.781711	0.99705	0.0059	0.185841	0.386431	0.646018	0.99115	0.00295	0.300885	0.501475	0.761062	1	0.39233	0.19469	0.412979	0.065089	0.076923	0	0.00295	0.218289	0.427729	0.654867	1	0.156342	0.286136	0.489676	0.79941	0.952802	0.011799	0.215339	0.536873	0.831858	0.99115	0.542773	0.343195	0.00885	0.256637	0.486726	0.731563	0.9941	0.330383
0.356164	0.383562	0.260274	0.282759	0.186207	0.2	0.041096	0.212329	0.506849	0.739726	0.972603	0.013699	0.239726	0.445205	0.712329	0.986301	0.006849	0.246575	0.59589	0.780822	1	0.486301	0.212329	0.30137	0.068966	0.055172	0	0.006849	0.267123	0.390411	0.650685	1	0.184932	0.458904	0.609589	0.80137	0.890411	0.034247	0.10274	0.541096	0.69863	0.965753	0.315068	0.441379	0.075342	0.438356	0.589041	0.760274	0.979452	0.363014
0.378641	0.281553	0.339806	0.215686	0.27451	0.196078	0.058252	0.223301	0.485437	0.747573	0.990291	0.019417	0.252427	0.436893	0.669903	0.941748	0.009709	0.165049	0.495146	0.796117	1	0.417476	0.291262	0.291262	0.088235	0.04902	0.009804	0.009709	0.165049	0.466019	0.796117	1	0.067961	0.126214	0.524272	0.650485	0.92233	0.184466	0.242718	0.320388	0.737864	0.854369	0.456311	0.352941	0.067961	0.242718	0.514563	0.718447	0.912621	0.271845
0.456107	0.316794	0.227099	0.292543	0.18738	0.1587	0.015267	0.270992	0.48855	0.757634	1	0.005725	0.194656	0.480916	0.730916	0.998092	0.001908	0.200382	0.555344	0.740458	0.98855	0.553435	0.173664	0.272901	0.080306	0.072658	0.007648	0.001908	0.23855	0.505725	0.812977	1	0.020992	0.375954	0.549618	0.742366	0.990458	0.03626	0.263359	0.423664	0.631679	0.994275	0.301527	0.279159	0.01145	0.183206	0.566794	0.744275	0.98855	0.349237
0.414269	0.357883	0.227848	0.275346	0.15553	0.172811	0.009206	0.30725	0.591484	0.818182	0.998849	0.002301	0.216341	0.504028	0.735328	1	0.001151	0.207135	0.365938	0.555811	0.995397	0.513234	0.113924	0.372842	0.043779	0.085253	0.006912	0.001151	0.296893	0.573072	0.736479	1	0.04603	0.188723	0.322209	0.448792	0.904488	0.013809	0.247411	0.483314	0.777906	0.996548	0.410817	0.31106	0.011507	0.209436	0.38435	0.703107	0.995397	0.43038
0.390459	0.272085	0.337456	0.215929	0.270796	0.226549	0.0053	0.265018	0.510601	0.773852	1	0.003534	0.210247	0.484099	0.710247	0.992933	0.001767	0.256184	0.501767	0.734982	0.998233	0.397527	0.393993	0.208481	0.113274	0.046018	0.017699	0.001767	0.263251	0.558304	0.773852	1	0.040636	0.226148	0.496466	0.69258	0.925795	0.0053	0.174912	0.397527	0.779152	0.992933	0.44523	0.4	0.008834	0.240283	0.484099	0.722615	0.992933	0.305654
0.433424	0.338315	0.228261	0.236735	0.165986	0.172789	0.002717	0.173913	0.360054	0.680707	0.991848	0.005435	0.302989	0.535326	0.797554	1	0.001359	0.403533	0.600543	0.773098	0.994565	0.494565	0.127717	0.377717	0.05034	0.088435	0.004082	0.001359	0.186141	0.394022	0.695652	1	0.016304	0.487772	0.701087	0.857337	0.997283	0.021739	0.308424	0.509511	0.767663	0.970109	0.451087	0.304762	0.01087	0.411685	0.58288	0.789402	0.997283	0.407609
0.358333	0.354167	0.2875	0.284519	0.179916	0.225941	0.0125	0.208333	0.4625	0.791667	1	0.008333	0.325	0.5625	0.779167	0.991667	0.004167	0.216667	0.3875	0.625	0.9625	0.275	0.116667	0.608333	0.037657	0.121339	0.004184	0.004167	0.141667	0.391667	0.725	1	0.133333	0.758333	0.804167	0.841667	0.870833	0.029167	0.254167	0.479167	0.633333	0.983333	0.483333	0.343096	0.020833	0.220833	0.420833	0.620833	0.945833	0.3125
0.366154	0.307692	0.326154	0.240741	0.216049	0.222222	0.009231	0.283077	0.523077	0.766154	0.996923	0.006154	0.193846	0.387692	0.72	0.987692	0.003077	0.298462	0.498462	0.741538	1	0.436923	0.218462	0.344615	0.074074	0.067901	0	0.003077	0.190769	0.455385	0.704615	1	0.092308	0.230769	0.44	0.753846	0.938462	0.024615	0.387692	0.578462	0.827692	0.975385	0.532308	0.32716	0.024615	0.258462	0.486154	0.726154	0.987692	0.326154
0.282451	0.390447	0.327103	0.205821	0.199584	0.279626	0.002077	0.224299	0.476636	0.739356	0.997923	0.003115	0.283489	0.537902	0.779855	1	0.001038	0.253375	0.477674	0.724818	0.998962	0.47352	0.166147	0.360332	0.076923	0.087318	0.008316	0.001038	0.279335	0.556594	0.760125	1	0.022845	0.274143	0.507788	0.773624	0.976116	0.010384	0.226376	0.418484	0.701973	0.997923	0.615784	0.365904	0.003115	0.262721	0.477674	0.751817	0.998962	0.407061
0.363636	0.46281	0.173554	0.4	0.141667	0.1	0.016529	0.280992	0.570248	0.760331	1	0.033058	0.330579	0.578512	0.818182	0.991736	0.008264	0.132231	0.256198	0.347107	0.702479	0.61157	0.173554	0.214876	0.083333	0.066667	0	0.008264	0.231405	0.553719	0.842975	1	0.090909	0.123967	0.198347	0.280992	0.413223	0.454545	0.495868	0.694215	0.743802	0.809917	0.247934	0.266667	0.041322	0.181818	0.305785	0.371901	0.77686	0.487603
0.39483	0.373678	0.231492	0.317647	0.172941	0.174118	0.0047	0.19389	0.458284	0.728555	1	0.00235	0.243243	0.473561	0.753231	0.998825	0.001175	0.393655	0.567568	0.766157	0.99765	0.571093	0.108108	0.320799	0.04	0.068235	0.002353	0.001175	0.182139	0.383079	0.745006	1	0.130435	0.478261	0.573443	0.714454	0.915394	0.047004	0.368978	0.584019	0.760282	0.996475	0.427732	0.327059	0.005875	0.400705	0.581669	0.759107	0.99765	0.407756
0.316312	0.419858	0.26383	0.235795	0.176136	0.203125	0.002837	0.2	0.492199	0.741844	0.998582	0.004255	0.249645	0.476596	0.780142	1	0.001418	0.286525	0.539007	0.73617	0.982979	0.607092	0.15461	0.238298	0.066761	0.066761	0.007102	0.001418	0.228369	0.446809	0.780142	1	0.038298	0.324823	0.631206	0.714894	0.98156	0.008511	0.248227	0.519149	0.726241	0.950355	0.507801	0.440341	0.009929	0.273759	0.52766	0.734752	0.984397	0.41844
0.331801	0.444853	0.223346	0.285189	0.160074	0.181233	0.004596	0.241728	0.528493	0.761029	0.999081	0.001838	0.215993	0.442096	0.770221	1	0.000919	0.335478	0.536765	0.694853	0.996324	0.670037	0.098346	0.231618	0.041398	0.061638	0.00276	0.000919	0.206801	0.443015	0.807904	1	0.025735	0.471507	0.591912	0.690257	0.992647	0.073529	0.272978	0.485294	0.639706	0.988051	0.451287	0.342226	0.011029	0.390625	0.564338	0.767463	0.996324	0.434743
0.438053	0.345133	0.216814	0.306667	0.204444	0.164444	0.017699	0.247788	0.517699	0.79646	1	0.00885	0.20354	0.49115	0.734513	0.982301	0.004425	0.300885	0.464602	0.676991	0.986726	0.672566	0.123894	0.20354	0.035556	0.062222	0	0.004425	0.20354	0.455752	0.778761	1	0.345133	0.464602	0.495575	0.663717	0.69469	0.017699	0.402655	0.575221	0.743363	0.986726	0.314159	0.328889	0.022124	0.362832	0.522124	0.668142	0.986726	0.384956
0.340426	0.326241	0.333333	0.25	0.207143	0.235714	0.014184	0.269504	0.475177	0.64539	0.957447	0.021277	0.212766	0.524823	0.77305	0.985816	0.007092	0.219858	0.468085	0.794326	1	0.411348	0.319149	0.269504	0.15	0.05	0.007143	0.007092	0.22695	0.546099	0.702128	1	0.198582	0.446809	0.609929	0.822695	0.992908	0.070922	0.12766	0.262411	0.326241	0.921986	0.489362	0.414286	0.035461	0.234043	0.496454	0.787234	0.992908	0.347518
0.314488	0.353357	0.332155	0.234043	0.219858	0.244681	0.010601	0.282686	0.597173	0.809187	0.996466	0.007067	0.243816	0.466431	0.738516	1	0.003534	0.212014	0.434629	0.628975	0.985866	0.533569	0.332155	0.134276	0.113475	0.042553	0.014184	0.003534	0.293286	0.611307	0.826855	1	0.021201	0.257951	0.399293	0.572438	0.968198	0.045936	0.088339	0.469965	0.696113	0.742049	0.452297	0.411348	0.014134	0.261484	0.448763	0.600707	0.992933	0.416961
0.469945	0.202186	0.327869	0.186813	0.313187	0.131868	0.016393	0.322404	0.595628	0.819672	1	0.010929	0.245902	0.387978	0.650273	0.983607	0.005464	0.163934	0.448087	0.628415	0.989071	0.295082	0.234973	0.469945	0.076923	0.087912	0.010989	0.005464	0.180328	0.393443	0.639344	1	0.021858	0.202186	0.377049	0.546448	0.775956	0.043716	0.327869	0.672131	0.868852	0.989071	0.442623	0.384615	0.021858	0.196721	0.409836	0.628415	0.989071	0.262295
0.386831	0.308642	0.304527	0.235537	0.210744	0.202479	0.012346	0.213992	0.481481	0.72428	0.99177	0.00823	0.246914	0.563786	0.798354	0.995885	0.004115	0.263374	0.45679	0.716049	1	0.329218	0.082305	0.588477	0.033058	0.107438	0	0.004115	0.176955	0.44856	0.794239	1	0.45679	0.781893	0.835391	0.855967	0.884774	0.041152	0.26749	0.473251	0.63786	0.975309	0.485597	0.347107	0.045267	0.259259	0.45679	0.654321	0.971193	0.325103
0.406545	0.306156	0.287299	0.241398	0.241398	0.169811	0.003328	0.239046	0.507488	0.731559	0.999445	0.001109	0.289517	0.50416	0.745979	1	0.000555	0.207432	0.473655	0.770383	0.997227	0.569606	0.160843	0.269551	0.064373	0.056604	0.00444	0.000555	0.287854	0.523572	0.678314	1	0.010538	0.260677	0.445369	0.77482	0.995563	0.006656	0.143649	0.418747	0.833611	0.991681	0.468109	0.358491	0.002773	0.281198	0.494176	0.806988	0.996672	0.324459
0.322917	0.291667	0.385417	0.147368	0.263158	0.252632	0.083333	0.229167	0.4375	0.875	1	0.041667	0.28125	0.552083	0.760417	0.947917	0.010417	0.177083	0.395833	0.645833	0.9375	0.28125	0.4375	0.28125	0.115789	0.073684	0.010526	0.010417	0.21875	0.520833	0.760417	1	0.145833	0.260417	0.427083	0.614583	0.75	0.03125	0.083333	0.822917	0.895833	0.96875	0.489583	0.4	0.03125	0.260417	0.447917	0.677083	0.9375	0.322917
0.308442	0.415584	0.275974	0.201954	0.159609	0.260586	0.061688	0.308442	0.512987	0.74026	1	0.006494	0.159091	0.415584	0.743506	0.980519	0.003247	0.217532	0.535714	0.766234	0.996753	0.470779	0.201299	0.327922	0.081433	0.081433	0.016287	0.003247	0.191558	0.366883	0.688312	1	0.094156	0.204545	0.558442	0.730519	0.808442	0.042208	0.422078	0.646104	0.866883	0.993506	0.470779	0.416938	0.016234	0.279221	0.590909	0.798701	0.993506	0.428571
0.401961	0.27451	0.323529	0.188119	0.267327	0.19802	0.029412	0.186275	0.372549	0.656863	0.980392	0.019608	0.294118	0.588235	0.764706	1	0.009804	0.245098	0.519608	0.823529	0.990196	0.470588	0.441176	0.088235	0.118812	0.019802	0.019802	0.009804	0.117647	0.352941	0.686275	1	0.27451	0.411765	0.568627	0.794118	0.931373	0.166667	0.176471	0.196078	0.215686	0.588235	0.441176	0.316832	0.137255	0.313725	0.509804	0.833333	0.970588	0.313725
0.410909	0.250909	0.338182	0.222628	0.30292	0.164234	0.010909	0.250909	0.516364	0.796364	0.996364	0.014545	0.247273	0.505455	0.636364	0.992727	0.003636	0.218182	0.447273	0.734545	1	0.370909	0.174545	0.454545	0.051095	0.080292	0	0.003636	0.189091	0.425455	0.672727	1	0.12	0.283636	0.363636	0.567273	0.658182	0.021818	0.254545	0.698182	0.821818	0.985455	0.545455	0.408759	0.029091	0.232727	0.454545	0.654545	0.978182	0.261818
0.347107	0.318182	0.334711	0.215768	0.19917	0.240664	0.008264	0.22314	0.487603	0.719008	0.995868	0.016529	0.27686	0.545455	0.780992	0.979339	0.004132	0.247934	0.450413	0.714876	1	0.516529	0.330579	0.152893	0.13278	0.041494	0.016598	0.004132	0.264463	0.557851	0.818182	1	0.115702	0.285124	0.533058	0.731405	0.96281	0.008264	0.041322	0.099174	0.475207	0.987603	0.549587	0.390041	0.016529	0.31405	0.533058	0.780992	0.991736	0.285124
0.372093	0.318937	0.30897	0.213333	0.25	0.206667	0.006645	0.245847	0.551495	0.813953	1	0.019934	0.242525	0.498339	0.700997	0.990033	0.003322	0.249169	0.458472	0.684385	0.996678	0.458472	0.162791	0.378738	0.046667	0.093333	0	0.003322	0.225914	0.581395	0.833887	1	0.13289	0.282392	0.365449	0.55814	0.644518	0.016611	0.242525	0.468439	0.740864	0.960133	0.495017	0.38	0.0299	0.222591	0.438538	0.624585	0.986711	0.335548
0.313152	0.402923	0.283925	0.225941	0.202929	0.225941	0.010438	0.367432	0.551148	0.755741	1	0.004175	0.177453	0.394572	0.720251	0.997912	0.002088	0.302714	0.51357	0.762004	0.991649	0.60334	0.14405	0.25261	0.054393	0.054393	0	0.002088	0.254697	0.507307	0.764092	1	0.068894	0.411273	0.584551	0.843424	0.983299	0.010438	0.179541	0.425887	0.638831	0.956159	0.511482	0.292887	0.008351	0.160752	0.384134	0.659708	0.987474	0.413361
0.304239	0.448878	0.246883	0.2275	0.1525	0.2275	0.007481	0.304239	0.551122	0.775561	0.997506	0.009975	0.206983	0.438903	0.683292	0.985037	0.002494	0.244389	0.526185	0.795511	1	0.551122	0.084788	0.36409	0.055	0.075	0.01	0.002494	0.184539	0.531172	0.733167	1	0.029925	0.077307	0.798005	0.860349	0.937656	0.054863	0.289277	0.389027	0.665835	0.992519	0.553616	0.34	0.014963	0.256858	0.53616	0.700748	0.985037	0.428928
0.394886	0.383523	0.221591	0.264957	0.196581	0.188034	0.008523	0.196023	0.482955	0.670455	0.988636	0.011364	0.269886	0.534091	0.8125	1	0.002841	0.241477	0.446023	0.732955	0.980114	0.789773	0.116477	0.09375	0.08547	0.051282	0.005698	0.002841	0.241477	0.525568	0.772727	1	0.03125	0.284091	0.653409	0.735795	0.920455	0.116477	0.247159	0.289773	0.502841	0.957386	0.238636	0.34188	0.03125	0.252841	0.420455	0.78125	0.980114	0.451705
0.331226	0.384324	0.28445	0.264557	0.212658	0.218987	0.003793	0.235145	0.505689	0.764855	1	0.002528	0.216182	0.48799	0.740834	0.994943	0.001264	0.298357	0.506953	0.735777	0.997472	0.381795	0.109987	0.508217	0.035443	0.108861	0.002532	0.001264	0.283186	0.572693	0.816688	1	0.255373	0.453856	0.556258	0.879899	0.93426	0.020228	0.193426	0.402023	0.661188	0.997472	0.472819	0.417722	0.013906	0.288243	0.504425	0.709229	0.997472	0.4311
0.333333	0.347222	0.319444	0.230769	0.195804	0.244755	0.048611	0.3125	0.541667	0.770833	1	0.013889	0.215278	0.5	0.673611	0.979167	0.006944	0.173611	0.479167	0.701389	0.909722	0.604167	0.277778	0.118056	0.125874	0.041958	0	0.006944	0.173611	0.513889	0.8125	1	0.236111	0.319444	0.486111	0.638889	0.909722	0.0625	0.083333	0.201389	0.75	0.784722	0.416667	0.363636	0.034722	0.194444	0.423611	0.645833	0.923611	0.354167
0.357977	0.459144	0.182879	0.332031	0.175781	0.140625	0.011673	0.225681	0.521401	0.762646	0.992218	0.007782	0.241245	0.494163	0.774319	1	0.003891	0.322957	0.474708	0.66537	0.988327	0.719844	0.101167	0.178988	0.03125	0.03125	0	0.003891	0.22179	0.400778	0.762646	1	0.416342	0.513619	0.540856	0.595331	0.708171	0.035019	0.07393	0.610895	0.937743	0.984436	0.361868	0.335938	0.019455	0.272374	0.490272	0.684825	0.988327	0.501946
0.330508	0.347458	0.322034	0.212766	0.225532	0.229787	0.012712	0.199153	0.5	0.788136	1	0.008475	0.258475	0.483051	0.728814	0.991525	0.004237	0.254237	0.508475	0.720339	0.940678	0.45339	0.317797	0.228814	0.110638	0.076596	0	0.004237	0.233051	0.423729	0.665254	1	0.038136	0.173729	0.309322	0.516949	0.783898	0.432203	0.694915	0.834746	0.898305	0.987288	0.538136	0.357447	0.016949	0.258475	0.487288	0.707627	0.927966	0.34322
0.369919	0.325203	0.304878	0.261224	0.24898	0.187755	0.00813	0.235772	0.54065	0.764228	1	0.020325	0.276423	0.52439	0.796748	0.98374	0.004065	0.227642	0.422764	0.646341	0.97561	0.296748	0.121951	0.581301	0.032653	0.097959	0	0.004065	0.162602	0.406504	0.654472	1	0.414634	0.735772	0.784553	0.813008	0.853659	0.01626	0.239837	0.487805	0.670732	0.99187	0.487805	0.35102	0.028455	0.235772	0.430894	0.654472	0.97561	0.292683
0.301994	0.384615	0.31339	0.225714	0.197143	0.222857	0.014245	0.293447	0.512821	0.752137	0.997151	0.005698	0.159544	0.430199	0.749288	1	0.002849	0.290598	0.541311	0.737892	0.988604	0.481481	0.518519	0	0.188571	0	0	0.002849	0.213675	0.48433	0.732194	1	0.039886	0.267806	0.507123	0.746439	0.985755	0	0	0	0	0	0.606838	0.382857	0.008547	0.264957	0.498575	0.720798	0.982906	0.452991
0.360489	0.279022	0.360489	0.208163	0.279592	0.2	0.010183	0.252546	0.496945	0.767821	1	0.004073	0.217923	0.486762	0.729124	0.99389	0.002037	0.238289	0.501018	0.743381	0.997963	0.370672	0.124236	0.505092	0.053061	0.085714	0.012245	0.002037	0.160896	0.486762	0.729124	1	0.08554	0.313646	0.503055	0.670061	0.885947	0.008147	0.250509	0.525458	0.771894	0.985743	0.547862	0.453061	0.008147	0.272912	0.501018	0.739308	0.991853	0.285132
0.352113	0.347418	0.300469	0.264151	0.226415	0.216981	0.018779	0.253521	0.497653	0.737089	0.976526	0.00939	0.220657	0.478873	0.769953	0.995305	0.004695	0.2723	0.488263	0.723005	1	0.525822	0.230047	0.244131	0.056604	0.056604	0.009434	0.004695	0.140845	0.41784	0.680751	1	0.201878	0.314554	0.539906	0.737089	0.929577	0.122066	0.366197	0.624413	0.830986	0.953052	0.441315	0.339623	0.164319	0.361502	0.558685	0.723005	0.948357	0.384977
0.284615	0.369231	0.346154	0.209302	0.232558	0.255814	0.038462	0.276923	0.476923	0.715385	1	0.015385	0.238462	0.538462	0.792308	0.992308	0.007692	0.215385	0.461538	0.661538	0.969231	0.569231	0.369231	0.061538	0.131783	0.054264	0.007752	0.007692	0.361538	0.676923	0.838462	1	0.023077	0.138462	0.338462	0.6	0.807692	0.284615	0.292308	0.315385	0.430769	0.946154	0.423077	0.449612	0.023077	0.2	0.446154	0.676923	0.969231	0.361538
0.3	0.285714	0.414286	0.188406	0.246377	0.15942	0.042857	0.214286	0.442857	0.714286	0.957143	0.057143	0.328571	0.414286	0.642857	0.942857	0.014286	0.142857	0.557143	0.785714	1	0.4	0.4	0.2	0.188406	0.043478	0.014493	0.014286	0.314286	0.628571	0.828571	1	0.228571	0.371429	0.571429	0.785714	0.914286	0.057143	0.085714	0.142857	0.185714	0.514286	0.571429	0.26087	0.057143	0.371429	0.514286	0.771429	0.928571	0.314286
0.324228	0.350356	0.325416	0.239001	0.210464	0.224732	0.008314	0.238717	0.486936	0.73753	0.998812	0.003563	0.251781	0.534442	0.774347	0.996437	0.001188	0.239905	0.480998	0.726841	1	0.406176	0.2019	0.391924	0.070155	0.084423	0.008323	0.001188	0.249406	0.526128	0.756532	1	0.004751	0.23753	0.566508	0.700713	0.947743	0.007126	0.25772	0.396675	0.748219	0.997625	0.598575	0.35434	0.004751	0.220903	0.488124	0.752969	0.996437	0.385986
0.378788	0.32197	0.299242	0.231499	0.214421	0.201139	0.003788	0.17803	0.410985	0.714015	1	0.017045	0.219697	0.450758	0.727273	0.996212	0.001894	0.420455	0.600379	0.778409	0.998106	0.549242	0.142045	0.308712	0.051233	0.062619	0.005693	0.001894	0.136364	0.278409	0.619318	1	0.214015	0.524621	0.67803	0.844697	0.9375	0.295455	0.44697	0.604167	0.808712	0.994318	0.488636	0.349146	0.00947	0.390152	0.57197	0.791667	0.994318	0.340909
0.427184	0.330097	0.242718	0.303922	0.127451	0.176471	0.029126	0.165049	0.339806	0.621359	0.873786	0.019417	0.223301	0.582524	0.796117	1	0.009709	0.38835	0.563107	0.786408	0.990291	0.679612	0.029126	0.291262	0.039216	0.058824	0	0.009709	0.194175	0.368932	0.640777	1	0.446602	0.446602	0.446602	0.456311	0.631068	0.048544	0.533981	0.757282	0.825243	0.902913	0.320388	0.333333	0.359223	0.504854	0.650485	0.825243	0.941748	0.359223
0.33657	0.320388	0.343042	0.194805	0.224026	0.253247	0.006472	0.239482	0.504854	0.754045	1	0.012945	0.307443	0.533981	0.779935	0.990291	0.003236	0.213592	0.449838	0.711974	0.996764	0.501618	0.307443	0.190939	0.116883	0.045455	0.006494	0.003236	0.239482	0.511327	0.744337	1	0.009709	0.294498	0.543689	0.721683	0.990291	0.019417	0.084142	0.378641	0.76699	0.993528	0.537217	0.363636	0.012945	0.330097	0.530744	0.757282	0.996764	0.300971
0.427184	0.271845	0.300971	0.205882	0.245098	0.127451	0.058252	0.281553	0.495146	0.737864	0.970874	0.019417	0.252427	0.553398	0.796117	0.92233	0.009709	0.194175	0.38835	0.699029	1	0.407767	0.592233	0	0.196078	0	0	0.009709	0.281553	0.543689	0.786408	1	0.019417	0.203883	0.407767	0.699029	0.990291	0	0	0	0	0	0.38835	0.509804	0.019417	0.213592	0.475728	0.708738	0.980583	0.242718
0.372093	0.348837	0.27907	0.242991	0.172897	0.196262	0.013953	0.27907	0.534884	0.72093	1	0.009302	0.195349	0.35814	0.655814	0.990698	0.004651	0.353488	0.604651	0.818605	0.972093	0.525581	0.148837	0.325581	0.102804	0.065421	0	0.004651	0.265116	0.395349	0.646512	1	0.018605	0.074419	0.576744	0.748837	0.930233	0.097674	0.190698	0.548837	0.795349	0.986047	0.497674	0.345794	0.018605	0.32093	0.506977	0.75814	0.986047	0.32093
0.434447	0.349614	0.215938	0.292453	0.190395	0.160377	0.001714	0.27078	0.520137	0.772065	1	0.005998	0.24593	0.507284	0.712939	0.999143	0.000857	0.191088	0.429306	0.731791	0.997429	0.651243	0.126821	0.221937	0.060034	0.066895	0.005146	0.000857	0.275921	0.497858	0.724079	1	0.007712	0.130249	0.379606	0.682948	0.968295	0.004284	0.264781	0.649529	0.786632	0.996572	0.311054	0.346484	0.003428	0.208226	0.463582	0.744644	0.997429	0.401885
0.356077	0.353945	0.289979	0.267094	0.215812	0.179487	0.004264	0.204691	0.420043	0.731343	0.995736	0.027719	0.232409	0.486141	0.727079	1	0.002132	0.339019	0.5629	0.784648	0.989339	0.484009	0.025586	0.490405	0.017094	0.08547	0	0.002132	0.183369	0.309168	0.682303	1	0.014925	0.01919	0.191898	0.968017	0.974414	0.059701	0.424307	0.575693	0.771855	0.948827	0.458422	0.435897	0.014925	0.34968	0.550107	0.765458	0.989339	0.405117
0.318072	0.433735	0.248193	0.2657	0.169082	0.214976	0.004819	0.214458	0.481928	0.725301	0.990361	0.007229	0.260241	0.515663	0.785542	1	0.00241	0.26988	0.520482	0.718072	0.992771	0.583133	0.151807	0.26506	0.067633	0.082126	0	0.00241	0.286747	0.549398	0.8	1	0.115663	0.298795	0.46988	0.648193	0.763855	0.007229	0.091566	0.486747	0.718072	0.987952	0.46506	0.381643	0.007229	0.296386	0.583133	0.792771	0.995181	0.428916
0.401763	0.241814	0.356423	0.181589	0.346784	0.184111	0.006297	0.253149	0.491184	0.739295	1	0.005038	0.251889	0.532746	0.74937	0.987406	0.001259	0.234257	0.479849	0.745592	0.998741	0.481108	0.234257	0.284635	0.094578	0.054224	0.001261	0.001259	0.209068	0.447103	0.738035	1	0.040302	0.211587	0.420655	0.798489	0.997481	0.006297	0.358942	0.575567	0.707809	0.992443	0.571788	0.401009	0.003778	0.245592	0.474811	0.739295	0.998741	0.260705
0.382022	0.393258	0.224719	0.295455	0.181818	0.181818	0.033708	0.146067	0.359551	0.640449	0.966292	0.022472	0.280899	0.483146	0.685393	0.988764	0.011236	0.404494	0.696629	0.797753	1	0.348315	0.033708	0.617978	0.022727	0.090909	0	0.011236	0.483146	0.606742	0.876404	1	0.94382	0.94382	0.94382	0.955056	0.966292	0.033708	0.168539	0.325843	0.674157	0.865169	0.348315	0.409091	0.146067	0.303371	0.651685	0.786517	0.94382	0.359551
0.382775	0.338517	0.278708	0.249102	0.215569	0.196407	0.007177	0.318182	0.549043	0.758373	0.995215	0.002392	0.194976	0.458134	0.740431	0.997608	0.001196	0.217703	0.482057	0.732057	1	0.618421	0.145933	0.235646	0.064671	0.088623	0	0.001196	0.282297	0.522727	0.759569	1	0.002392	0.216507	0.393541	0.61244	0.998804	0.019139	0.253589	0.498804	0.726077	0.982057	0.450957	0.419162	0.002392	0.202153	0.42823	0.696172	0.996411	0.366029
0.436893	0.271845	0.291262	0.323529	0.254902	0.127451	0.07767	0.31068	0.533981	0.776699	1	0.029126	0.23301	0.514563	0.796117	0.970874	0.009709	0.145631	0.38835	0.660194	0.873786	0.446602	0.203883	0.349515	0.078431	0.058824	0	0.009709	0.242718	0.737864	0.883495	1	0.038835	0.281553	0.368932	0.417476	0.504854	0.067961	0.145631	0.582524	0.669903	0.873786	0.368932	0.392157	0.038835	0.242718	0.38835	0.601942	0.815534	0.330097
0.358044	0.381703	0.260252	0.254344	0.192733	0.210111	0.012618	0.250789	0.44164	0.746057	1	0.003155	0.288644	0.570978	0.757098	0.998423	0.001577	0.190852	0.455836	0.687697	0.992114	0.55205	0.167192	0.280757	0.066351	0.050553	0	0.001577	0.304416	0.621451	0.758675	1	0.004732	0.113565	0.253943	0.403785	0.569401	0.023659	0.272871	0.484227	0.913249	0.993691	0.539432	0.319115	0.003155	0.287066	0.597792	0.747634	0.988959	0.383281
0.327869	0.348361	0.32377	0.226337	0.218107	0.222222	0.032787	0.290984	0.487705	0.786885	0.995902	0.008197	0.233607	0.540984	0.692623	1	0.004098	0.168033	0.45082	0.737705	0.987705	0.536885	0.315574	0.147541	0.098765	0.032922	0.00823	0.004098	0.29918	0.545082	0.680328	1	0.012295	0.118852	0.344262	0.704918	0.848361	0.266393	0.409836	0.909836	0.946721	0.987705	0.54918	0.337449	0.016393	0.221311	0.512295	0.737705	0.987705	0.32377
0.418605	0.348837	0.232558	0.3125	0.226562	0.1875	0.062016	0.325581	0.573643	0.821705	1	0.015504	0.186047	0.472868	0.744186	0.992248	0.007752	0.193798	0.410853	0.542636	0.945736	0.534884	0.139535	0.325581	0.0625	0.078125	0	0.007752	0.302326	0.697674	0.829457	1	0.023256	0.108527	0.147287	0.503876	0.914729	0.209302	0.27907	0.44186	0.565891	0.651163	0.387597	0.421875	0.015504	0.155039	0.372093	0.627907	0.829457	0.333333
0.405567	0.266402	0.328032	0.217131	0.292829	0.175299	0.005964	0.250497	0.469185	0.741551	0.998012	0.003976	0.220676	0.491054	0.72167	1	0.001988	0.282306	0.520875	0.753479	0.994036	0.377734	0.198807	0.423459	0.057769	0.073705	0.005976	0.001988	0.153082	0.353877	0.628231	1	0.097416	0.28827	0.375746	0.479125	0.779324	0.047714	0.427435	0.701789	0.842942	0.986083	0.485089	0.434263	0.007952	0.282306	0.500994	0.725646	0.992048	0.298211
0.349372	0.332636	0.317992	0.234801	0.232704	0.192872	0.004184	0.177824	0.472803	0.723849	1	0.01046	0.330544	0.600418	0.834728	0.997908	0.002092	0.232218	0.439331	0.646444	0.972803	0.539749	0.123431	0.33682	0.052411	0.056604	0.002096	0.002092	0.320084	0.608787	0.834728	1	0.016736	0.23431	0.328452	0.650628	0.972803	0.006276	0.154812	0.399582	0.575314	0.799163	0.543933	0.343816	0.006276	0.286611	0.479079	0.73431	0.979079	0.368201
0.312253	0.375494	0.312253	0.253968	0.190476	0.234127	0.01581	0.213439	0.426877	0.731225	0.956522	0.007905	0.3083	0.549407	0.810277	1	0.003953	0.229249	0.482213	0.695652	0.988142	0.442688	0.189723	0.367589	0.063492	0.063492	0	0.003953	0.367589	0.754941	0.885375	1	0.142292	0.201581	0.355731	0.719368	0.833992	0.01581	0.110672	0.407115	0.501976	0.889328	0.41502	0.388889	0.019763	0.225296	0.442688	0.648221	0.972332	0.387352
0.342105	0.37218	0.285714	0.25283	0.2	0.188679	0.007519	0.240602	0.507519	0.781955	0.988722	0.011278	0.225564	0.496241	0.759398	1	0.003759	0.278195	0.469925	0.661654	0.966165	0.413534	0.078947	0.507519	0.030189	0.090566	0	0.003759	0.109023	0.451128	0.75188	1	0.473684	0.774436	0.819549	0.838346	0.868421	0.052632	0.296992	0.458647	0.642857	0.954887	0.466165	0.34717	0.030075	0.278195	0.466165	0.650376	0.947368	0.424812
0.349709	0.35682	0.293471	0.249677	0.209573	0.217982	0.003232	0.231416	0.499677	0.765999	0.998061	0.001293	0.264383	0.488688	0.745314	1	0.000646	0.247576	0.506141	0.741435	0.995475	0.472527	0.166774	0.360698	0.06533	0.069211	0.005821	0.000646	0.275372	0.455074	0.754363	1	0.019392	0.270847	0.461538	0.769231	0.960569	0.02521	0.173885	0.54234	0.734971	0.995475	0.528119	0.40621	0.001939	0.25404	0.500323	0.736264	0.996768	0.355527
0.359736	0.330033	0.310231	0.261589	0.192053	0.241722	0.013201	0.264026	0.452145	0.759076	1	0.006601	0.254125	0.544554	0.735974	0.993399	0.0033	0.221122	0.514851	0.726073	0.980198	0.491749	0.181518	0.326733	0.069536	0.076159	0.009934	0.0033	0.30033	0.518152	0.772277	1	0.059406	0.125413	0.570957	0.775578	0.943894	0.023102	0.237624	0.462046	0.712871	0.966997	0.429043	0.397351	0.016502	0.214521	0.438944	0.693069	0.993399	0.382838
0.401961	0.294118	0.303922	0.237624	0.207921	0.178218	0.039216	0.27451	0.558824	0.735294	1	0.019608	0.22549	0.441176	0.794118	0.990196	0.009804	0.147059	0.45098	0.686275	0.892157	0.509804	0.196078	0.294118	0.089109	0.069307	0.009901	0.009804	0.215686	0.372549	0.647059	1	0.117647	0.284314	0.54902	0.686275	0.735294	0.029412	0.392157	0.470588	0.813725	0.892157	0.401961	0.356436	0.029412	0.176471	0.421569	0.686275	0.882353	0.27451
0.371762	0.274611	0.353627	0.199741	0.300908	0.1738	0.007772	0.279793	0.541451	0.759067	0.998705	0.005181	0.220207	0.463731	0.705959	0.994819	0.001295	0.240933	0.492228	0.756477	1	0.467617	0.234456	0.297927	0.092088	0.058366	0.001297	0.001295	0.207254	0.431347	0.734456	1	0.042746	0.186528	0.436528	0.80829	0.967617	0.006477	0.331606	0.554404	0.713731	0.997409	0.572539	0.399481	0.003886	0.246114	0.487047	0.739637	0.996114	0.283679
0.29918	0.393443	0.307377	0.255144	0.160494	0.263374	0.028689	0.204918	0.512295	0.77459	1	0.008197	0.282787	0.528689	0.766393	0.987705	0.004098	0.229508	0.430328	0.639344	0.995902	0.368852	0.102459	0.528689	0.032922	0.074074	0	0.004098	0.168033	0.454918	0.778689	1	0.418033	0.75	0.77459	0.827869	0.864754	0.032787	0.237705	0.483607	0.622951	0.959016	0.483607	0.353909	0.012295	0.237705	0.487705	0.672131	0.995902	0.393443
0.358974	0.333333	0.307692	0.221963	0.235981	0.21729	0.013986	0.263403	0.503497	0.792541	0.997669	0.004662	0.226107	0.508159	0.736597	0.993007	0.002331	0.247086	0.477855	0.694639	1	0.389277	0.398601	0.212121	0.107477	0.056075	0.023364	0.002331	0.27972	0.5338	0.764569	1	0.04662	0.265734	0.543124	0.757576	0.979021	0.004662	0.09324	0.32634	0.713287	0.995338	0.480186	0.397196	0.009324	0.2331	0.487179	0.72028	0.990676	0.398601
0.344828	0.393103	0.262069	0.3125	0.194444	0.173611	0.02069	0.186207	0.537931	0.717241	1	0.041379	0.213793	0.413793	0.737931	0.993103	0.006897	0.296552	0.524138	0.731034	0.965517	0.606897	0.158621	0.234483	0.076389	0.034722	0.020833	0.006897	0.158621	0.365517	0.62069	1	0.027586	0.289655	0.468966	0.8	0.951724	0.482759	0.531034	0.689655	0.855172	0.917241	0.482759	0.347222	0.062069	0.248276	0.468966	0.696552	0.944828	0.37931
0.270833	0.34375	0.385417	0.2	0.221053	0.284211	0.020833	0.166667	0.364583	0.614583	0.979167	0.041667	0.25	0.552083	0.71875	0.96875	0.010417	0.28125	0.5	0.802083	1	0.46875	0.322917	0.208333	0.147368	0.042105	0	0.010417	0.229167	0.614583	0.84375	1	0.041667	0.270833	0.552083	0.78125	0.90625	0.125	0.166667	0.354167	0.40625	0.458333	0.34375	0.378947	0.041667	0.1875	0.416667	0.5625	0.927083	0.260417
0.310606	0.431818	0.257576	0.274809	0.183206	0.19084	0.037879	0.257576	0.568182	0.727273	0.984848	0.015152	0.280303	0.522727	0.772727	1	0.007576	0.189394	0.340909	0.583333	0.962121	0.507576	0.492424	0	0.152672	0	0	0.007576	0.363636	0.636364	0.856061	1	0.037879	0.189394	0.356061	0.598485	0.969697	0	0	0	0	0	0.340909	0.381679	0.045455	0.204545	0.416667	0.606061	0.962121	0.431818
0.281022	0.408759	0.310219	0.227771	0.202192	0.274056	0.002433	0.243309	0.489051	0.73236	1	0.004866	0.248175	0.515815	0.759124	0.995134	0.001217	0.244526	0.486618	0.738443	0.997567	0.458637	0.238443	0.30292	0.097442	0.053593	0.002436	0.001217	0.199513	0.469586	0.742092	1	0.037713	0.253041	0.409976	0.801703	0.997567	0.006083	0.312652	0.555961	0.710462	0.992701	0.564477	0.375152	0.00365	0.26764	0.491484	0.733577	0.997567	0.447689
0.417476	0.38835	0.194175	0.343137	0.147059	0.156863	0.048544	0.203883	0.436893	0.699029	0.980583	0.019417	0.271845	0.485437	0.796117	1	0.009709	0.320388	0.582524	0.728155	0.941748	0.223301	0.009709	0.76699	0.019608	0.058824	0	0.009709	0.048544	0.106796	0.718447	1	0.737864	0.737864	0.737864	0.737864	0.737864	0.126214	0.300971	0.524272	0.786408	0.980583	0.262136	0.392157	0.126214	0.359223	0.572816	0.68932	0.951456	0.436893
0.358951	0.390597	0.250452	0.236199	0.175566	0.230769	0.002712	0.246835	0.462929	0.744123	1	0.001808	0.174503	0.487342	0.737794	0.997288	0.000904	0.371609	0.566908	0.761302	0.998192	0.762206	0.090416	0.147378	0.049774	0.037104	0.000905	0.000904	0.243219	0.483725	0.697107	1	0.022604	0.367089	0.504521	0.820976	0.96745	0.001808	0.216998	0.839964	0.906872	0.983725	0.356239	0.428959	0.003617	0.138336	0.474684	0.771248	0.995479	0.468354
0.322624	0.46988	0.207497	0.266756	0.146113	0.206434	0.002677	0.263722	0.538153	0.795181	0.998661	0.004016	0.243641	0.497992	0.742972	1	0.001339	0.238286	0.444444	0.717537	0.994645	0.67336	0.10174	0.2249	0.037534	0.050938	0.002681	0.001339	0.246319	0.503347	0.738956	1	0.065596	0.219545	0.321285	0.757697	0.840696	0.088353	0.30656	0.682731	0.84739	0.995984	0.468541	0.33244	0.01071	0.219545	0.443106	0.605087	0.994645	0.453815
0.355789	0.322105	0.322105	0.202532	0.21097	0.225738	0.012632	0.256842	0.425263	0.648421	0.997895	0.004211	0.261053	0.616842	0.829474	1	0.002105	0.214737	0.507368	0.745263	0.983158	0.456842	0.168421	0.374737	0.07173	0.037975	0	0.002105	0.208421	0.646316	0.831579	1	0.056842	0.635789	0.749474	0.863158	0.972632	0.008421	0.271579	0.366316	0.458947	0.593684	0.477895	0.434599	0.012632	0.267368	0.585263	0.785263	0.978947	0.351579
0.391003	0.290657	0.318339	0.211438	0.256499	0.162912	0.00692	0.299308	0.569204	0.83218	0.99654	0.00346	0.200692	0.50173	0.721453	0.986159	0.00173	0.214533	0.451557	0.688581	1	0.366782	0.141869	0.491349	0.051993	0.083189	0.003466	0.00173	0.238754	0.532872	0.780277	1	0.084775	0.237024	0.382353	0.543253	0.756055	0.022491	0.252595	0.525952	0.83737	0.99481	0.489619	0.34662	0.010381	0.202422	0.422145	0.610727	0.99308	0.32872
0.405882	0.314706	0.279412	0.225331	0.200295	0.181149	0.005882	0.158824	0.438235	0.732353	1	0.002941	0.289706	0.514706	0.760294	0.992647	0.001471	0.364706	0.557353	0.744118	0.998529	0.491176	0.127941	0.380882	0.045655	0.07511	0.007364	0.001471	0.183824	0.377941	0.739706	1	0.126471	0.426471	0.577941	0.714706	0.926471	0.004412	0.348529	0.529412	0.801471	0.997059	0.427941	0.324006	0.007353	0.385294	0.545588	0.738235	0.997059	0.351471
0.387234	0.306383	0.306383	0.260684	0.269231	0.153846	0.012766	0.26383	0.519149	0.748936	0.982979	0.008511	0.246809	0.382979	0.723404	1	0.004255	0.174468	0.53617	0.761702	0.991489	0.540426	0.148936	0.310638	0.094017	0.068376	0	0.004255	0.259574	0.404255	0.73617	1	0.012766	0.06383	0.531915	0.757447	0.987234	0.089362	0.187234	0.578723	0.795745	0.957447	0.519149	0.358974	0.017021	0.319149	0.502128	0.753191	0.991489	0.32766
0.341394	0.364154	0.294452	0.225071	0.225071	0.202279	0.002845	0.273115	0.529161	0.773826	0.998578	0.004267	0.213371	0.416785	0.661451	0.997155	0.001422	0.295875	0.587482	0.776671	1	0.473684	0.027027	0.499289	0.011396	0.105413	0.002849	0.001422	0.220484	0.357041	0.485064	1	0.00569	0.009957	0.153627	0.290185	0.524893	0.029872	0.517781	0.678521	0.83926	0.99431	0.573257	0.430199	0.00569	0.294452	0.519203	0.739687	0.99431	0.366999
0.333333	0.303571	0.363095	0.191045	0.256716	0.235821	0.008929	0.264881	0.5	0.776786	0.991071	0.005952	0.241071	0.485119	0.744048	1	0.002976	0.232143	0.494048	0.705357	0.988095	0.458333	0.145833	0.395833	0.071642	0.065672	0	0.002976	0.270833	0.592262	0.782738	1	0.008929	0.235119	0.357143	0.6875	0.934524	0.044643	0.151786	0.473214	0.636905	0.991071	0.565476	0.346269	0.005952	0.247024	0.479167	0.705357	0.988095	0.318452
0.394737	0.324561	0.280702	0.221239	0.20354	0.176991	0.035088	0.236842	0.421053	0.754386	0.991228	0.026316	0.263158	0.535088	0.640351	1	0.008772	0.219298	0.5	0.763158	0.973684	0.403509	0.263158	0.333333	0.088496	0.070796	0.017699	0.008772	0.315789	0.508772	0.868421	1	0.04386	0.096491	0.447368	0.561404	0.824561	0.157895	0.22807	0.622807	0.701754	0.929825	0.438596	0.40708	0.026316	0.210526	0.45614	0.649123	0.973684	0.289474
0.310345	0.431034	0.258621	0.306358	0.17341	0.179191	0.028736	0.229885	0.54023	0.735632	1	0.011494	0.183908	0.511494	0.747126	0.977011	0.005747	0.247126	0.454023	0.724138	0.994253	0.591954	0.172414	0.235632	0.069364	0.080925	0	0.005747	0.16092	0.436782	0.701149	1	0.218391	0.252874	0.5	0.574713	0.95977	0.137931	0.321839	0.678161	0.752874	0.91954	0.436782	0.393064	0.017241	0.298851	0.477011	0.706897	0.965517	0.413793
0.367188	0.3125	0.320312	0.247059	0.239216	0.203922	0.015625	0.230469	0.5	0.695312	0.996094	0.007812	0.261719	0.546875	0.808594	1	0.003906	0.226562	0.472656	0.710938	0.992188	0.359375	0.121094	0.519531	0.058824	0.098039	0.003922	0.003906	0.136719	0.492188	0.753906	1	0.015625	0.152344	0.273438	0.644531	0.78125	0.027344	0.3125	0.527344	0.8125	0.992188	0.515625	0.376471	0.019531	0.222656	0.433594	0.71875	0.878906	0.320312
0.357143	0.330357	0.3125	0.2287	0.215247	0.201794	0.026786	0.245536	0.477679	0.732143	1	0.022321	0.263393	0.446429	0.75	0.986607	0.004464	0.183036	0.535714	0.736607	0.991071	0.522321	0.151786	0.325893	0.089686	0.06278	0	0.004464	0.272321	0.410714	0.696429	1	0.013393	0.066964	0.5625	0.71875	0.919643	0.09375	0.196429	0.540179	0.794643	0.986607	0.513393	0.376682	0.017857	0.330357	0.513393	0.78125	0.991071	0.357143
0.410909	0.381818	0.207273	0.29927	0.211679	0.149635	0.014545	0.250909	0.48	0.72	0.981818	0.007273	0.192727	0.436364	0.723636	1	0.003636	0.363636	0.607273	0.781818	0.996364	0.727273	0.036364	0.236364	0.021898	0.072993	0	0.003636	0.181818	0.432727	0.767273	1	0.807273	0.810909	0.872727	0.898182	0.909091	0.250909	0.356364	0.523636	0.661818	0.978182	0.243636	0.357664	0.010909	0.276364	0.549091	0.778182	0.985455	0.432727
0.368421	0.410526	0.221053	0.380952	0.164021	0.15873	0.015789	0.315789	0.610526	0.789474	1	0.010526	0.268421	0.510526	0.778947	0.984211	0.005263	0.157895	0.347368	0.515789	0.889474	0.347368	0.294737	0.357895	0.058201	0.089947	0.005291	0.005263	0.305263	0.721053	0.905263	1	0.021053	0.378947	0.463158	0.536842	0.9	0.068421	0.173684	0.273684	0.621053	0.942105	0.321053	0.359788	0.021053	0.178947	0.310526	0.478947	0.878947	0.431579
0.373434	0.358396	0.26817	0.233375	0.183187	0.196989	0.002506	0.250627	0.513784	0.753133	0.998747	0.007519	0.201754	0.451128	0.746867	1	0.001253	0.300752	0.502506	0.739348	0.997494	0.512531	0.116541	0.370927	0.046424	0.076537	0.003764	0.001253	0.129073	0.389724	0.710526	1	0.182957	0.365915	0.517544	0.672932	0.91604	0.053885	0.373434	0.615288	0.833333	0.991228	0.427318	0.311167	0.010025	0.313283	0.487469	0.720551	0.997494	0.383459
0.384123	0.357234	0.258643	0.258974	0.174359	0.180769	0.005122	0.245839	0.449424	0.745198	0.996159	0.003841	0.213828	0.448143	0.714469	1	0.00128	0.329065	0.615877	0.774648	0.997439	0.590269	0.117798	0.291933	0.042308	0.067949	0.008974	0.00128	0.215109	0.364917	0.587708	1	0.037132	0.582586	0.722151	0.854033	0.959027	0.028169	0.494238	0.65557	0.807939	0.996159	0.449424	0.364103	0.006402	0.330346	0.591549	0.796415	0.997439	0.409731
0.357909	0.348525	0.293566	0.230872	0.201342	0.2	0.004021	0.215818	0.502681	0.730563	0.993298	0.002681	0.257373	0.517426	0.816354	1	0.00134	0.246649	0.47319	0.717158	0.995979	0.549598	0.162198	0.288204	0.071141	0.079195	0.001342	0.00134	0.270777	0.525469	0.758713	1	0.096515	0.321716	0.577748	0.766756	0.997319	0.012064	0.140751	0.394102	0.678284	0.957105	0.475871	0.357047	0.012064	0.254692	0.474531	0.753351	0.997319	0.379357
0.417085	0.318593	0.264322	0.236419	0.208249	0.165996	0.005025	0.229146	0.521608	0.774874	0.998995	0.00201	0.245226	0.512563	0.767839	0.994975	0.001005	0.262312	0.464322	0.679397	1	0.517588	0.115578	0.366834	0.047284	0.091549	0.00503	0.001005	0.159799	0.527638	0.794975	1	0.123618	0.285427	0.390955	0.535678	0.868342	0.00402	0.294472	0.515578	0.676382	0.99598	0.415075	0.336016	0.003015	0.228141	0.40201	0.59598	0.980905	0.351759
0.431767	0.369128	0.199105	0.320628	0.183857	0.14574	0.008949	0.272931	0.512304	0.774049	1	0.004474	0.187919	0.42953	0.686801	0.975391	0.002237	0.304251	0.624161	0.753915	0.995526	0.753915	0.053691	0.192394	0.038117	0.05157	0.002242	0.002237	0.234899	0.427293	0.720358	1	0.053691	0.178971	0.199105	0.691275	0.832215	0.114094	0.608501	0.702461	0.760626	0.988814	0.373602	0.367713	0.013423	0.425056	0.58613	0.751678	0.995526	0.353468
0.375	0.367857	0.257143	0.275492	0.198569	0.168157	0.010714	0.225	0.492857	0.783929	1	0.003571	0.264286	0.503571	0.746429	0.998214	0.001786	0.25	0.491071	0.710714	0.996429	0.535714	0.146429	0.317857	0.062612	0.069767	0.005367	0.001786	0.219643	0.507143	0.751786	1	0.044643	0.401786	0.475	0.605357	0.991071	0.023214	0.257143	0.432143	0.785714	0.985714	0.441071	0.36136	0.007143	0.235714	0.516071	0.694643	0.996429	0.382143
0.351906	0.430108	0.217986	0.273973	0.144814	0.196673	0.00391	0.26784	0.491691	0.769306	0.997067	0.001955	0.244379	0.504399	0.740958	1	0.000978	0.230694	0.486804	0.737048	0.999022	0.69697	0.063539	0.239492	0.029354	0.056751	0.001957	0.000978	0.246334	0.499511	0.721408	1	0.061584	0.384164	0.57869	0.907136	0.979472	0.006843	0.213099	0.435973	0.750733	0.998045	0.312805	0.348337	0.005865	0.220919	0.496579	0.753666	0.99609	0.484848
0.279412	0.411765	0.308824	0.19403	0.208955	0.253731	0.029412	0.147059	0.573529	0.882353	1	0.058824	0.25	0.441176	0.676471	0.941176	0.014706	0.220588	0.367647	0.588235	0.897059	0.529412	0.25	0.220588	0.089552	0.029851	0	0.014706	0.132353	0.426471	0.647059	1	0.161765	0.205882	0.323529	0.455882	0.529412	0.691176	0.720588	0.779412	0.838235	0.897059	0.411765	0.477612	0.073529	0.264706	0.529412	0.661765	0.897059	0.382353
0.340017	0.447254	0.212729	0.246946	0.129145	0.212042	0.001744	0.243243	0.482999	0.851787	1	0.002616	0.269398	0.562337	0.737576	0.999128	0.000872	0.164778	0.460331	0.654752	0.987794	0.726242	0.058413	0.215344	0.026178	0.059337	0.005236	0.000872	0.326068	0.588492	0.786399	1	0.054926	0.444638	0.499564	0.68701	0.975588	0.001744	0.081953	0.19442	0.458588	0.967742	0.37925	0.319372	0.002616	0.248474	0.518745	0.720139	0.984307	0.465562
0.382582	0.349922	0.267496	0.274143	0.214953	0.188474	0.004666	0.317263	0.562986	0.765163	0.998445	0.00311	0.222395	0.489891	0.790047	1	0.001555	0.202177	0.412131	0.651633	0.993779	0.51633	0.144635	0.339036	0.057632	0.066978	0.007788	0.001555	0.29549	0.676516	0.861586	1	0.07154	0.283048	0.391913	0.539658	0.872473	0.012442	0.186625	0.40591	0.606532	0.85381	0.471229	0.342679	0.012442	0.202177	0.412131	0.62675	0.993779	0.387247
0.364865	0.324324	0.310811	0.217687	0.238095	0.258503	0.040541	0.283784	0.533784	0.72973	1	0.02027	0.243243	0.459459	0.831081	0.993243	0.006757	0.175676	0.452703	0.662162	0.972973	0.432432	0.175676	0.391892	0.054422	0.068027	0	0.006757	0.358108	0.77027	0.878378	1	0.128378	0.162162	0.222973	0.317568	0.972973	0.033784	0.385135	0.533784	0.655405	0.756757	0.493243	0.408163	0.027027	0.162162	0.344595	0.621622	0.912162	0.324324
0.422819	0.288591	0.288591	0.209459	0.27027	0.182432	0.013423	0.255034	0.442953	0.744966	1	0.087248	0.261745	0.516779	0.711409	0.959732	0.006711	0.194631	0.530201	0.731544	0.966443	0.362416	0.302013	0.33557	0.128378	0.047297	0.006757	0.006711	0.14094	0.557047	0.744966	1	0.013423	0.241611	0.604027	0.872483	0.973154	0.167785	0.322148	0.409396	0.637584	0.818792	0.395973	0.486486	0.020134	0.201342	0.516779	0.731544	0.966443	0.302013
0.328059	0.418776	0.253165	0.262936	0.149947	0.214361	0.003165	0.301688	0.521097	0.78481	1	0.00211	0.194093	0.482068	0.751055	0.996835	0.001055	0.285865	0.474684	0.709916	0.995781	0.530591	0.147679	0.32173	0.057022	0.07603	0.004224	0.001055	0.163502	0.418776	0.724684	1	0.006329	0.277426	0.501055	0.664557	0.986287	0.059072	0.380802	0.580169	0.825949	0.996835	0.456751	0.310454	0.005274	0.318565	0.514768	0.725738	0.995781	0.433544
0.312977	0.354962	0.332061	0.210728	0.203065	0.279693	0.007634	0.160305	0.370229	0.732824	0.992366	0.015267	0.312977	0.530534	0.782443	0.996183	0.003817	0.251908	0.5	0.698473	1	0.339695	0.064885	0.59542	0.045977	0.084291	0	0.003817	0.290076	0.515267	0.774809	1	0.015267	0.080153	0.09542	0.293893	0.969466	0.030534	0.244275	0.549618	0.755725	0.958015	0.503817	0.45977	0.015267	0.339695	0.549618	0.717557	0.977099	0.381679
0.366306	0.346213	0.287481	0.232198	0.19969	0.198142	0.021638	0.318393	0.619784	0.843895	1	0.003091	0.18238	0.462133	0.695518	0.995363	0.001546	0.222566	0.446677	0.658423	0.982998	0.446677	0.125193	0.42813	0.049536	0.080495	0.003096	0.001546	0.242658	0.542504	0.771252	1	0.097372	0.238022	0.386399	0.528594	0.982998	0.035549	0.248841	0.514683	0.791345	0.967543	0.459042	0.356037	0.027821	0.216383	0.418856	0.598145	0.982998	0.378671
0.331839	0.452915	0.215247	0.333333	0.13964	0.171171	0.026906	0.29148	0.475336	0.695067	1	0.013453	0.255605	0.560538	0.744395	0.995516	0.004484	0.174888	0.331839	0.7713	0.991031	0.479821	0.278027	0.242152	0.09009	0.081081	0.009009	0.004484	0.304933	0.524664	0.690583	1	0.008969	0.09417	0.206278	0.331839	0.820628	0.484305	0.672646	0.798206	0.892377	0.991031	0.367713	0.423423	0.008969	0.219731	0.430493	0.807175	0.991031	0.488789
0.330218	0.317757	0.352025	0.2	0.24375	0.203125	0.015576	0.224299	0.498442	0.750779	0.996885	0.018692	0.333333	0.548287	0.728972	1	0.003115	0.211838	0.464174	0.753894	0.990654	0.501558	0.267913	0.23053	0.10625	0.05625	0.00625	0.003115	0.246106	0.523364	0.772586	1	0.012461	0.274143	0.47352	0.672897	0.94704	0.037383	0.115265	0.495327	0.862928	0.993769	0.510903	0.38125	0.012461	0.327103	0.529595	0.747664	0.990654	0.271028
0.310592	0.362657	0.32675	0.239209	0.197842	0.253597	0.005386	0.247756	0.477558	0.696589	1	0.003591	0.238779	0.506284	0.775583	0.996409	0.001795	0.245961	0.51526	0.736086	0.992819	0.576302	0.143627	0.280072	0.052158	0.084532	0.008993	0.001795	0.235189	0.536804	0.815081	1	0.059246	0.346499	0.527828	0.64991	0.969479	0.005386	0.251346	0.40395	0.671454	0.958707	0.48474	0.442446	0.014363	0.314183	0.524237	0.743268	0.992819	0.348294
0.368864	0.417952	0.213184	0.280899	0.151685	0.161517	0.002805	0.235624	0.429173	0.667602	0.998597	0.004208	0.290323	0.608696	0.810659	1	0.001403	0.231417	0.464236	0.681627	0.997195	0.706872	0.145863	0.147265	0.075843	0.047753	0	0.001403	0.308555	0.605891	0.786816	1	0.00561	0.224404	0.352034	0.546985	0.995792	0.02805	0.15568	0.269285	0.509116	0.848527	0.45021	0.33427	0.007013	0.339411	0.628331	0.812062	0.99439	0.415147
0.423529	0.294118	0.282353	0.261905	0.238095	0.178571	0.023529	0.2	0.494118	0.705882	0.988235	0.070588	0.188235	0.435294	0.729412	1	0.011765	0.305882	0.517647	0.788235	0.964706	0.623529	0.035294	0.341176	0.047619	0.071429	0	0.011765	0.152941	0.423529	0.811765	1	0.235294	0.235294	0.235294	0.247059	0.458824	0.305882	0.376471	0.635294	0.717647	0.905882	0.4	0.452381	0.129412	0.329412	0.6	0.764706	0.964706	0.258824
0.390244	0.280488	0.329268	0.17284	0.308642	0.197531	0.02439	0.280488	0.597561	0.792683	1	0.073171	0.170732	0.329268	0.560976	0.902439	0.012195	0.256098	0.47561	0.731707	0.963415	0.634146	0.268293	0.097561	0.123457	0.024691	0	0.012195	0.231707	0.52439	0.841463	1	0.134146	0.182927	0.304878	0.426829	0.621951	0.682927	0.695122	0.719512	0.743902	0.768293	0.353659	0.395062	0.060976	0.268293	0.45122	0.54878	0.804878	0.304878
0.272849	0.467742	0.259409	0.22611	0.164199	0.230148	0.009409	0.307796	0.567204	0.748656	0.995968	0.004032	0.181452	0.392473	0.724462	1	0.001344	0.358871	0.571237	0.762097	0.991935	0.646505	0.120968	0.232527	0.047106	0.063257	0.004038	0.001344	0.18414	0.408602	0.776882	1	0.094086	0.525538	0.668011	0.737903	0.979839	0.163978	0.372312	0.538978	0.700269	0.97043	0.478495	0.374159	0.033602	0.194892	0.549731	0.754032	0.990591	0.452957
0.370474	0.337047	0.292479	0.215084	0.251397	0.164804	0.008357	0.253482	0.479109	0.70195	1	0.02507	0.320334	0.526462	0.777159	0.994429	0.002786	0.214485	0.51532	0.724234	0.997214	0.440111	0.197772	0.362117	0.125698	0.055866	0.011173	0.002786	0.37883	0.562674	0.802228	0.991643	0.008357	0.590529	0.715877	0.832869	1	0.011142	0.153203	0.245125	0.437326	0.902507	0.420613	0.402235	0.005571	0.197772	0.568245	0.746518	0.997214	0.376045
0.37013	0.272727	0.357143	0.117647	0.300654	0.24183	0.012987	0.318182	0.487013	0.662338	0.961039	0.038961	0.188312	0.461039	0.720779	1	0.006494	0.220779	0.532468	0.811688	0.993506	0.337662	0.298701	0.363636	0.117647	0.078431	0.013072	0.006494	0.175325	0.577922	0.766234	1	0.032468	0.25974	0.623377	0.883117	0.980519	0.012987	0.311688	0.402597	0.493506	0.824675	0.396104	0.470588	0.032468	0.220779	0.545455	0.779221	0.980519	0.272727
0.328213	0.351657	0.320129	0.217638	0.236246	0.219256	0.00485	0.206144	0.481811	0.755861	1	0.001617	0.264349	0.489086	0.731609	0.999192	0.000808	0.279709	0.524656	0.757478	0.997575	0.47211	0.144705	0.383185	0.054207	0.06877	0.005663	0.000808	0.226354	0.489895	0.770412	1	0.004042	0.219887	0.495554	0.691188	0.997575	0.058205	0.291835	0.521423	0.736459	0.991108	0.52304	0.380259	0.004042	0.292643	0.506871	0.746968	0.997575	0.354082
0.444444	0.197531	0.358025	0.225	0.3125	0.125	0.074074	0.296296	0.54321	0.765432	1	0.061728	0.197531	0.45679	0.790123	0.938272	0.012346	0.222222	0.395062	0.62963	0.950617	0.259259	0.320988	0.419753	0.1125	0.0375	0.0125	0.012346	0.185185	0.345679	0.481481	1	0.024691	0.08642	0.246914	0.358025	0.518519	0.530864	0.617284	0.728395	0.851852	0.962963	0.407407	0.425	0.024691	0.222222	0.395062	0.54321	0.938272	0.185185
0.330275	0.302752	0.366972	0.203704	0.25	0.240741	0.036697	0.247706	0.495413	0.779817	1	0.018349	0.302752	0.513761	0.733945	0.963303	0.009174	0.229358	0.440367	0.715596	0.990826	0.422018	0.577982	0	0.203704	0	0	0.009174	0.275229	0.522936	0.752294	1	0.027523	0.229358	0.449541	0.706422	0.981651	0	0	0	0	0	0.431193	0.314815	0.045872	0.238532	0.568807	0.697248	0.990826	0.357798
0.371901	0.438017	0.190083	0.274834	0.134106	0.15894	0.014876	0.249587	0.47438	0.707438	1	0.003306	0.22314	0.552066	0.801653	0.998347	0.001653	0.271074	0.442975	0.680992	0.993388	0.766942	0.049587	0.183471	0.019868	0.033113	0.003311	0.001653	0.284298	0.616529	0.808264	1	0.216529	0.300826	0.358678	0.408264	0.547107	0.008264	0.173554	0.266116	0.461157	0.606612	0.385124	0.357616	0.008264	0.264463	0.471074	0.704132	0.960331	0.446281
0.413462	0.311298	0.27524	0.202166	0.198556	0.20698	0.00601	0.183894	0.469952	0.786058	1	0.003606	0.269231	0.502404	0.716346	0.992788	0.001202	0.319712	0.550481	0.746394	0.987981	0.498798	0.122596	0.378606	0.048135	0.079422	0.00722	0.001202	0.140625	0.336538	0.645433	1	0.078125	0.371394	0.557692	0.670673	0.987981	0.010817	0.391827	0.649038	0.828125	0.984375	0.430288	0.305656	0.032452	0.292067	0.504808	0.697115	0.987981	0.347356
0.330425	0.385108	0.284468	0.237485	0.189173	0.223516	0.002909	0.237347	0.474113	0.725422	1	0.001163	0.280396	0.562536	0.803956	0.999418	0.000582	0.209424	0.452007	0.680628	0.997091	0.547411	0.162885	0.289703	0.068102	0.065774	0.00291	0.000582	0.311809	0.592787	0.826062	1	0.010471	0.379872	0.475276	0.651542	0.995346	0.001745	0.166376	0.300756	0.600349	0.990692	0.485166	0.369034	0.001745	0.197208	0.436882	0.665503	0.997091	0.37929
0.436	0.372	0.192	0.281124	0.188755	0.136546	0.012	0.208	0.492	0.776	1	0.008	0.304	0.548	0.744	0.996	0.004	0.196	0.38	0.64	0.96	0.728	0.1	0.172	0.040161	0.048193	0	0.004	0.248	0.604	0.784	1	0.26	0.36	0.384	0.444	0.936	0.016	0.052	0.32	0.476	0.856	0.356	0.305221	0.052	0.384	0.636	0.768	0.944	0.344
0.360406	0.390863	0.248731	0.260204	0.188776	0.183673	0.045685	0.203046	0.451777	0.695431	0.989848	0.010152	0.258883	0.57868	0.791878	1	0.005076	0.213198	0.441624	0.639594	0.984772	0.598985	0.182741	0.218274	0.061224	0.040816	0	0.005076	0.269036	0.634518	0.80203	1	0.025381	0.441624	0.527919	0.675127	0.908629	0.096447	0.142132	0.19797	0.416244	0.614213	0.360406	0.326531	0.040609	0.35533	0.538071	0.86802	0.984772	0.390863
0.417178	0.358896	0.223926	0.32	0.181538	0.141538	0.021472	0.300613	0.555215	0.791411	1	0.006135	0.211656	0.496933	0.769939	0.981595	0.003067	0.251534	0.43865	0.570552	0.93865	0.493865	0.095092	0.411043	0.055385	0.073846	0	0.003067	0.214724	0.411043	0.674847	1	0.01227	0.046012	0.374233	0.481595	0.601227	0.064417	0.358896	0.631902	0.858896	0.990798	0.447853	0.326154	0.01227	0.248466	0.435583	0.613497	0.981595	0.386503
0.356989	0.322581	0.32043	0.200431	0.213362	0.221983	0.004301	0.288172	0.516129	0.862366	0.997849	0.006452	0.191398	0.466667	0.705376	0.978495	0.002151	0.245161	0.492473	0.686022	1	0.490323	0.139785	0.369892	0.05819	0.084052	0.006466	0.002151	0.288172	0.670968	0.877419	1	0.010753	0.255914	0.423656	0.634409	0.748387	0.036559	0.223656	0.397849	0.565591	0.862366	0.509677	0.323276	0.008602	0.217204	0.412903	0.64086	0.995699	0.363441
0.447761	0.291045	0.261194	0.285714	0.24812	0.090226	0.052239	0.268657	0.537313	0.738806	1	0.014925	0.134328	0.402985	0.716418	0.992537	0.007463	0.19403	0.455224	0.746269	0.977612	0.470149	0.485075	0.044776	0.150376	0.015038	0	0.007463	0.335821	0.597015	0.80597	1	0.014925	0.164179	0.365672	0.58209	0.880597	0.947761	0.947761	0.962687	0.970149	0.985075	0.358209	0.43609	0.014925	0.19403	0.402985	0.589552	0.962687	0.291045
0.413043	0.25	0.336957	0.153846	0.296703	0.241758	0.021739	0.217391	0.434783	0.695652	1	0.076087	0.23913	0.456522	0.717391	0.956522	0.01087	0.184783	0.51087	0.804348	0.98913	0.445652	0.336957	0.217391	0.175824	0.043956	0	0.01087	0.315217	0.641304	0.771739	1	0.032609	0.23913	0.532609	0.793478	0.923913	0.119565	0.163043	0.358696	0.413043	0.467391	0.369565	0.395604	0.032609	0.184783	0.456522	0.771739	0.945652	0.228261
0.337748	0.342715	0.319536	0.21393	0.217247	0.218905	0.006623	0.173841	0.483444	0.738411	0.993377	0.003311	0.256623	0.471854	0.753311	1	0.001656	0.311258	0.52649	0.75	0.998344	0.465232	0.157285	0.377483	0.058043	0.087894	0.004975	0.001656	0.149007	0.400662	0.642384	1	0.004967	0.39404	0.629139	0.726821	0.895695	0.062914	0.326159	0.562914	0.799669	0.996689	0.518212	0.361526	0.004967	0.307947	0.5	0.751656	0.998344	0.360927
0.334158	0.363861	0.30198	0.265509	0.203474	0.220844	0.00495	0.279703	0.579208	0.824257	1	0.007426	0.252475	0.507426	0.747525	0.997525	0.002475	0.215347	0.418317	0.643564	0.938119	0.356436	0.059406	0.584158	0.034739	0.08933	0.004963	0.002475	0.25495	0.591584	0.871287	1	0.042079	0.079208	0.094059	0.413366	0.962871	0.007426	0.294554	0.487624	0.660891	0.908416	0.534653	0.411911	0.009901	0.277228	0.517327	0.695545	0.987624	0.39604
0.340278	0.399306	0.260417	0.273043	0.144348	0.203478	0.005208	0.199653	0.418403	0.708333	0.994792	0.006944	0.248264	0.522569	0.743056	0.996528	0.001736	0.309028	0.567708	0.776042	1	0.539931	0.125	0.335069	0.048696	0.086957	0.003478	0.001736	0.164931	0.34375	0.637153	1	0.236111	0.571181	0.696181	0.871528	0.960069	0.005208	0.380208	0.588542	0.791667	0.991319	0.520833	0.365217	0.008681	0.322917	0.538194	0.743056	0.986111	0.432292
0.335227	0.434659	0.230114	0.253561	0.190883	0.165242	0.022727	0.221591	0.451705	0.701705	0.988636	0.005682	0.309659	0.573864	0.809659	1	0.002841	0.184659	0.366477	0.650568	0.963068	0.659091	0.150568	0.190341	0.062678	0.051282	0	0.002841	0.400568	0.627841	0.835227	1	0.019886	0.113636	0.25	0.346591	0.491477	0.056818	0.15625	0.372159	0.525568	0.71875	0.53125	0.393162	0.019886	0.298295	0.571023	0.809659	0.994318	0.454545
0.362245	0.306122	0.331633	0.202046	0.263427	0.209719	0.010204	0.247449	0.528061	0.752551	0.994898	0.005102	0.229592	0.454082	0.714286	1	0.002551	0.267857	0.497449	0.755102	0.987245	0.387755	0.186224	0.42602	0.076726	0.081841	0	0.002551	0.280612	0.553571	0.77551	1	0.09949	0.262755	0.566327	0.798469	0.933673	0.007653	0.206633	0.466837	0.719388	0.987245	0.563776	0.393862	0.007653	0.27551	0.482143	0.729592	0.987245	0.27551
0.290844	0.414722	0.294434	0.23741	0.176259	0.26259	0.003591	0.240575	0.48474	0.788151	0.994614	0.005386	0.253142	0.517056	0.694794	0.998205	0.001795	0.244165	0.472172	0.745063	1	0.603232	0.213645	0.183124	0.071942	0.05036	0	0.001795	0.263914	0.517056	0.732496	1	0.014363	0.231598	0.454219	0.773788	0.994614	0.030521	0.199282	0.43088	0.745063	0.964093	0.536804	0.330935	0.005386	0.233393	0.493716	0.692998	0.992819	0.420108
0.322034	0.40113	0.276836	0.244318	0.210227	0.227273	0.016949	0.231638	0.451977	0.655367	0.977401	0.011299	0.248588	0.548023	0.779661	1	0.00565	0.214689	0.457627	0.762712	0.943503	0.40678	0.259887	0.333333	0.096591	0.0625	0.017045	0.00565	0.169492	0.519774	0.762712	1	0.112994	0.276836	0.615819	0.841808	0.926554	0.045198	0.355932	0.440678	0.649718	0.949153	0.40113	0.477273	0.028249	0.248588	0.497175	0.723164	0.949153	0.355932
0.318043	0.385321	0.296636	0.254601	0.187117	0.251534	0.012232	0.211009	0.474006	0.697248	0.996942	0.006116	0.302752	0.556575	0.779817	1	0.003058	0.235474	0.446483	0.730887	0.984709	0.501529	0.262997	0.235474	0.104294	0.04908	0.01227	0.003058	0.238532	0.544343	0.7737	1	0.006116	0.250765	0.519878	0.666667	0.929664	0.024465	0.103976	0.461774	0.840979	0.981651	0.504587	0.368098	0.009174	0.302752	0.504587	0.727829	0.984709	0.373089
0.363484	0.353434	0.283082	0.278523	0.209732	0.191275	0.0067	0.281407	0.561139	0.777219	1	0.00335	0.18258	0.450586	0.720268	0.99665	0.001675	0.283082	0.470687	0.703518	0.9866	0.467337	0.142379	0.390285	0.055369	0.075503	0.005034	0.001675	0.20268	0.561139	0.772194	1	0.0067	0.288107	0.440536	0.631491	0.931323	0.033501	0.266332	0.497487	0.785595	0.917923	0.472362	0.33557	0.011725	0.229481	0.440536	0.676717	0.9866	0.370184
0.394737	0.381579	0.223684	0.298013	0.15894	0.178808	0.013158	0.243421	0.565789	0.809211	1	0.019737	0.256579	0.460526	0.782895	0.993421	0.006579	0.184211	0.427632	0.605263	0.901316	0.407895	0.217105	0.375	0.059603	0.099338	0.019868	0.006579	0.309211	0.664474	0.881579	1	0.019737	0.092105	0.342105	0.434211	0.644737	0.144737	0.230263	0.552632	0.730263	0.907895	0.375	0.317881	0.046053	0.184211	0.381579	0.552632	0.717105	0.375
0.315985	0.3829	0.301115	0.25	0.186567	0.242537	0.007435	0.286245	0.494424	0.762082	1	0.022305	0.260223	0.572491	0.784387	0.996283	0.003717	0.200743	0.408922	0.609665	0.988848	0.773234	0.152416	0.074349	0.070896	0.033582	0.011194	0.003717	0.330855	0.550186	0.747212	1	0.011152	0.223048	0.282528	0.821561	0.918216	0.052045	0.066914	0.156134	0.472119	0.988848	0.364312	0.425373	0.01487	0.249071	0.483271	0.825279	0.988848	0.412639
0.502326	0.269767	0.227907	0.242991	0.228972	0.130841	0.009302	0.311628	0.567442	0.846512	1	0.013953	0.223256	0.455814	0.64186	0.967442	0.004651	0.162791	0.4	0.632558	0.981395	0.44186	0.12093	0.437209	0.060748	0.088785	0.004673	0.004651	0.302326	0.618605	0.809302	1	0.013953	0.037209	0.218605	0.274419	0.790698	0.069767	0.316279	0.474419	0.72093	0.962791	0.353488	0.35514	0.013953	0.190698	0.348837	0.613953	0.981395	0.255814
0.389247	0.384946	0.225806	0.25	0.200431	0.176724	0.006452	0.219355	0.498925	0.744086	1	0.004301	0.28172	0.56129	0.767742	0.995699	0.002151	0.23871	0.43871	0.660215	0.997849	0.677419	0.094624	0.227957	0.036638	0.040948	0.006466	0.002151	0.27957	0.595699	0.804301	1	0.283871	0.322581	0.436559	0.834409	0.926882	0.032258	0.126882	0.329032	0.486022	0.802151	0.408602	0.37931	0.012903	0.24086	0.443011	0.724731	0.989247	0.380645
0.459916	0.232068	0.308017	0.211864	0.292373	0.161017	0.012658	0.248945	0.489451	0.751055	1	0.008439	0.261603	0.438819	0.662447	0.995781	0.004219	0.21519	0.523207	0.767932	0.978903	0.362869	0.177215	0.459916	0.04661	0.072034	0.004237	0.004219	0.206751	0.35443	0.7173	1	0.016878	0.080169	0.160338	0.248945	0.734177	0.362869	0.493671	0.628692	0.801688	0.974684	0.333333	0.466102	0.033755	0.244726	0.514768	0.742616	0.978903	0.265823
0.40625	0.260417	0.333333	0.162304	0.272251	0.172775	0.010417	0.260417	0.546875	0.755208	1	0.020833	0.208333	0.484375	0.765625	0.96875	0.005208	0.234375	0.473958	0.682292	0.989583	0.395833	0.411458	0.192708	0.146597	0.031414	0	0.005208	0.260417	0.604167	0.848958	1	0.015625	0.145833	0.453125	0.640625	0.953125	0.317708	0.359375	0.40625	0.786458	0.838542	0.4375	0.450262	0.03125	0.348958	0.479167	0.640625	0.942708	0.229167
0.265152	0.390152	0.344697	0.235741	0.174905	0.315589	0.018939	0.227273	0.560606	0.82197	0.992424	0.007576	0.295455	0.511364	0.80303	1	0.003788	0.204545	0.412879	0.628788	0.981061	0.496212	0.348485	0.155303	0.102662	0.064639	0.003802	0.003788	0.314394	0.579545	0.863636	1	0.011364	0.246212	0.409091	0.602273	0.962121	0.05303	0.094697	0.511364	0.768939	0.82197	0.481061	0.418251	0.011364	0.261364	0.454545	0.625	0.981061	0.412879
0.359929	0.41844	0.221631	0.309059	0.152753	0.179396	0.005319	0.274823	0.489362	0.696809	0.996454	0.003546	0.265957	0.512411	0.72695	1	0.001773	0.189716	0.446809	0.810284	0.992908	0.638298	0.171986	0.189716	0.065719	0.044405	0.005329	0.001773	0.317376	0.491135	0.656028	1	0.019504	0.147163	0.324468	0.812057	0.994681	0.04078	0.191489	0.693262	0.886525	0.978723	0.379433	0.294849	0.01773	0.230496	0.402482	0.803191	0.994681	0.409574
0.316456	0.386076	0.297468	0.196825	0.231746	0.222222	0.009494	0.170886	0.490506	0.772152	1	0.03481	0.287975	0.550633	0.731013	0.993671	0.003165	0.221519	0.455696	0.667722	0.996835	0.392405	0.155063	0.452532	0.044444	0.088889	0	0.003165	0.170886	0.43038	0.686709	1	0.174051	0.329114	0.414557	0.598101	0.68038	0.037975	0.272152	0.522152	0.835443	0.993671	0.541139	0.412698	0.015823	0.253165	0.493671	0.702532	0.996835	0.427215
0.408163	0.29932	0.292517	0.232877	0.260274	0.19863	0.013605	0.258503	0.442177	0.748299	0.993197	0.088435	0.319728	0.564626	0.734694	1	0.006803	0.142857	0.469388	0.741497	0.979592	0.353741	0.312925	0.333333	0.130137	0.047945	0.006849	0.006803	0.142857	0.510204	0.748299	1	0.013605	0.244898	0.619048	0.891156	0.993197	0.170068	0.326531	0.408163	0.489796	0.829932	0.387755	0.479452	0.020408	0.204082	0.52381	0.727891	0.979592	0.306122
0.295345	0.382825	0.32183	0.211245	0.200803	0.235341	0.002408	0.271268	0.540931	0.761637	1	0.00321	0.213483	0.446228	0.716693	0.999197	0.000803	0.29053	0.520867	0.764045	0.997592	0.475923	0.108347	0.41573	0.04257	0.079518	0.004016	0.000803	0.158909	0.385233	0.684591	1	0.004815	0.307384	0.509631	0.697432	0.869984	0.024077	0.373997	0.616372	0.843499	0.998395	0.521669	0.380723	0.005618	0.284109	0.516854	0.748796	0.998395	0.403692
0.375	0.367647	0.257353	0.281481	0.177778	0.2	0.022059	0.205882	0.389706	0.654412	0.992647	0.036765	0.235294	0.558824	0.816176	1	0.007353	0.286765	0.477941	0.698529	0.948529	0.316176	0.007353	0.676471	0.014815	0.074074	0	0.007353	0.176471	0.647059	0.911765	1	0.977941	0.977941	0.977941	0.977941	0.977941	0.058824	0.272059	0.441176	0.683824	0.867647	0.411765	0.459259	0.029412	0.308824	0.492647	0.691176	0.926471	0.352941
0.295302	0.422819	0.281879	0.277027	0.168919	0.256757	0.073826	0.422819	0.590604	0.738255	0.986577	0.020134	0.161074	0.409396	0.758389	1	0.006711	0.234899	0.442953	0.697987	0.959732	0.61745	0.288591	0.09396	0.060811	0.02027	0.006757	0.006711	0.214765	0.510067	0.771812	1	0.33557	0.395973	0.503356	0.691275	0.818792	0.040268	0.053691	0.080537	0.825503	0.852349	0.33557	0.472973	0.040268	0.268456	0.456376	0.684564	0.926174	0.422819
0.35461	0.248227	0.397163	0.192857	0.271429	0.178571	0.021277	0.205674	0.48227	0.723404	1	0.035461	0.35461	0.510638	0.702128	0.985816	0.007092	0.163121	0.475177	0.758865	0.978723	0.319149	0.148936	0.531915	0.05	0.092857	0.007143	0.007092	0.319149	0.446809	0.751773	1	0.120567	0.390071	0.48227	0.51773	0.787234	0.021277	0.184397	0.567376	0.702128	0.971631	0.489362	0.414286	0.021277	0.191489	0.510638	0.716312	0.971631	0.205674
0.323529	0.433824	0.242647	0.276753	0.151292	0.214022	0.011029	0.183824	0.463235	0.720588	0.996324	0.007353	0.216912	0.518382	0.779412	1	0.003676	0.330882	0.503676	0.713235	0.974265	0.363971	0.099265	0.536765	0.02952	0.103321	0	0.003676	0.102941	0.279412	0.709559	1	0.507353	0.801471	0.841912	0.875	0.900735	0.051471	0.327206	0.496324	0.661765	0.963235	0.452206	0.309963	0.018382	0.3125	0.481618	0.669118	0.966912	0.470588
0.389091	0.4	0.210909	0.306569	0.160584	0.178832	0.007273	0.269091	0.516364	0.752727	0.996364	0.018182	0.250909	0.505455	0.781818	1	0.003636	0.207273	0.450909	0.614545	0.934545	0.494545	0.072727	0.432727	0.043796	0.072993	0	0.003636	0.163636	0.421818	0.810909	1	0.010909	0.083636	0.178182	0.276364	0.418182	0.12	0.429091	0.6	0.709091	0.930909	0.298182	0.306569	0.010909	0.254545	0.512727	0.647273	0.963636	0.385455
0.354839	0.258065	0.387097	0.184783	0.228261	0.163043	0.053763	0.268817	0.494624	0.655914	0.978495	0.021505	0.344086	0.72043	0.892473	0.989247	0.010753	0.215054	0.430108	0.688172	1	0.430108	0.397849	0.172043	0.152174	0.065217	0.021739	0.010753	0.204301	0.602151	0.892473	1	0.215054	0.322581	0.537634	0.741935	0.88172	0.032258	0.11828	0.16129	0.430108	0.483871	0.494624	0.304348	0.064516	0.236559	0.451613	0.774194	0.956989	0.301075
0.285211	0.419014	0.295775	0.226148	0.169611	0.250883	0.010563	0.21831	0.447183	0.757042	0.989437	0.007042	0.239437	0.475352	0.760563	1	0.003521	0.257042	0.507042	0.721831	0.996479	0.390845	0.172535	0.43662	0.04947	0.09894	0	0.003521	0.190141	0.454225	0.704225	1	0.169014	0.323944	0.443662	0.644366	0.735915	0.021127	0.232394	0.528169	0.834507	0.996479	0.538732	0.416961	0.017606	0.235915	0.475352	0.661972	0.996479	0.457746
0.397516	0.31677	0.285714	0.2125	0.20625	0.2	0.018634	0.167702	0.391304	0.602484	1	0.012422	0.229814	0.583851	0.850932	0.987578	0.006211	0.310559	0.596273	0.763975	0.993789	0.515528	0.15528	0.329193	0.075	0.0875	0	0.006211	0.267081	0.602484	0.857143	1	0.180124	0.571429	0.677019	0.732919	0.981366	0.018634	0.142857	0.329193	0.453416	0.78882	0.459627	0.325	0.080745	0.360248	0.614907	0.751553	0.981366	0.304348
0.307407	0.333333	0.359259	0.193309	0.230483	0.215613	0.007407	0.214815	0.47037	0.762963	0.996296	0.011111	0.225926	0.459259	0.714815	0.992593	0.003704	0.262963	0.514815	0.759259	1	0.511111	0.255556	0.233333	0.089219	0.05948	0	0.003704	0.207407	0.414815	0.722222	1	0.17037	0.27037	0.551852	0.774074	0.914815	0.051852	0.111111	0.5	0.82963	0.992593	0.537037	0.342007	0.014815	0.337037	0.548148	0.759259	0.985185	0.385185
0.336538	0.331731	0.331731	0.2657	0.251208	0.217391	0.014423	0.230769	0.552885	0.778846	1	0.009615	0.221154	0.466346	0.745192	0.995192	0.004808	0.254808	0.480769	0.697115	0.947115	0.427885	0.384615	0.1875	0.130435	0.05314	0.004831	0.004808	0.274038	0.581731	0.793269	1	0.014423	0.298077	0.447115	0.629808	0.879808	0.081731	0.221154	0.567308	0.9375	0.985577	0.418269	0.444444	0.019231	0.240385	0.451923	0.677885	0.884615	0.360577
0.32539	0.406049	0.268561	0.26055	0.16789	0.222018	0.001833	0.235564	0.489459	0.740605	1	0.003666	0.217232	0.468378	0.777269	0.999083	0.000917	0.313474	0.555454	0.730522	0.996334	0.569203	0.093492	0.337305	0.043119	0.081651	0.002752	0.000917	0.172319	0.394134	0.771769	1	0.021998	0.284143	0.385885	0.88451	0.996334	0.004583	0.497709	0.614115	0.735105	0.938588	0.509624	0.387156	0.006416	0.339138	0.560037	0.757104	0.996334	0.401467
0.388805	0.376702	0.234493	0.268182	0.183333	0.178788	0.007564	0.310136	0.518911	0.7882	0.998487	0.003026	0.183056	0.453858	0.738275	1	0.001513	0.26475	0.481089	0.70348	0.966717	0.540091	0.161876	0.298033	0.065152	0.062121	0.001515	0.001513	0.217852	0.523449	0.742814	1	0.102874	0.234493	0.376702	0.487141	0.92587	0.013616	0.325265	0.608169	0.898638	0.995461	0.490166	0.306061	0.019667	0.313162	0.596067	0.768533	0.971256	0.379728
0.45045	0.198198	0.351351	0.1	0.309091	0.118182	0.018018	0.171171	0.522523	0.765766	1	0.117117	0.207207	0.333333	0.468468	0.810811	0.009009	0.252252	0.594595	0.792793	0.990991	0.351351	0.171171	0.477477	0.072727	0.054545	0.018182	0.009009	0.171171	0.315315	0.684685	1	0.234234	0.261261	0.378378	0.720721	0.972973	0.081081	0.441441	0.558559	0.837838	0.963964	0.432432	0.381818	0.045045	0.261261	0.477477	0.72973	0.990991	0.198198
0.438017	0.272727	0.289256	0.208333	0.233333	0.191667	0.016529	0.206612	0.471074	0.719008	1	0.041322	0.256198	0.553719	0.735537	0.983471	0.008264	0.247934	0.495868	0.694215	0.991736	0.421488	0.157025	0.421488	0.041667	0.091667	0.008333	0.008264	0.198347	0.619835	0.892562	1	0.22314	0.247934	0.355372	0.396694	0.702479	0.033058	0.14876	0.520661	0.77686	0.884298	0.429752	0.35	0.057851	0.347107	0.495868	0.68595	0.917355	0.239669
0.33564	0.422145	0.242215	0.260417	0.163194	0.215278	0.010381	0.269896	0.463668	0.747405	0.979239	0.00692	0.221453	0.543253	0.820069	1	0.00346	0.242215	0.487889	0.67474	0.989619	0.519031	0.190311	0.290657	0.083333	0.055556	0	0.00346	0.214533	0.543253	0.844291	1	0.013841	0.16263	0.346021	0.643599	0.99308	0.107266	0.304498	0.508651	0.712803	0.816609	0.449827	0.354167	0.017301	0.259516	0.574394	0.747405	0.989619	0.453287
0.323308	0.390977	0.285714	0.242938	0.190207	0.220339	0.005639	0.266917	0.537594	0.802632	0.99812	0.003759	0.25188	0.520677	0.755639	0.996241	0.00188	0.214286	0.43985	0.648496	1	0.479323	0.06015	0.460526	0.016949	0.073446	0.00565	0.00188	0.257519	0.612782	0.843985	1	0.058271	0.071429	0.191729	0.389098	0.639098	0.005639	0.31203	0.477444	0.644737	0.994361	0.488722	0.308851	0.007519	0.219925	0.43609	0.62782	0.992481	0.413534
0.287671	0.369863	0.342466	0.206897	0.234483	0.255172	0.047945	0.294521	0.575342	0.780822	0.993151	0.013699	0.212329	0.479452	0.657534	1	0.006849	0.184932	0.493151	0.767123	0.986301	0.390411	0.219178	0.390411	0.068966	0.096552	0	0.006849	0.164384	0.458904	0.657534	1	0.020548	0.068493	0.431507	0.506849	0.986301	0.171233	0.308219	0.575342	0.835616	0.945205	0.479452	0.496552	0.027397	0.232877	0.479452	0.726027	0.979452	0.410959
0.378641	0.300971	0.320388	0.196078	0.254902	0.186275	0.048544	0.213592	0.446602	0.669903	0.990291	0.058252	0.262136	0.495146	0.815534	1	0.009709	0.15534	0.466019	0.68932	0.941748	0.378641	0.417476	0.203883	0.137255	0.039216	0	0.009709	0.242718	0.427184	0.815534	1	0.019417	0.281553	0.621359	0.776699	0.941748	0.145631	0.184466	0.446602	0.495146	0.553398	0.485437	0.372549	0.019417	0.291262	0.592233	0.776699	0.951456	0.252427
0.424125	0.202335	0.373541	0.175781	0.304688	0.152344	0.015564	0.249027	0.529183	0.758755	1	0.007782	0.159533	0.44358	0.642023	0.941634	0.003891	0.264591	0.501946	0.77821	0.980545	0.463035	0.307393	0.229572	0.125	0.054688	0	0.003891	0.284047	0.509728	0.747082	1	0.11284	0.229572	0.451362	0.715953	0.902724	0.007782	0.077821	0.494163	0.77821	0.953307	0.486381	0.40625	0.019455	0.303502	0.486381	0.743191	0.961089	0.217899
0.411765	0.309598	0.278638	0.26087	0.267081	0.167702	0.009288	0.244582	0.50774	0.798762	0.996904	0.006192	0.272446	0.473684	0.696594	0.96904	0.003096	0.232198	0.501548	0.721362	1	0.448916	0.151703	0.399381	0.055901	0.068323	0	0.003096	0.417957	0.640867	0.764706	1	0.099071	0.145511	0.393189	0.55418	0.869969	0.012384	0.20743	0.365325	0.795666	0.990712	0.396285	0.416149	0.021672	0.226006	0.408669	0.55418	0.98452	0.417957
0.39823	0.348673	0.253097	0.237589	0.161348	0.159574	0.00531	0.306195	0.646018	0.861947	1	0.00354	0.20708	0.460177	0.715044	0.99115	0.00177	0.235398	0.40708	0.575221	0.943363	0.60354	0.166372	0.230088	0.051418	0.065603	0.005319	0.00177	0.307965	0.688496	0.838938	1	0.00531	0.215929	0.338053	0.578761	0.642478	0.030088	0.230088	0.4	0.486726	0.906195	0.361062	0.283688	0.00708	0.20708	0.366372	0.523894	0.688496	0.380531
0.27381	0.375	0.35119	0.209581	0.161677	0.251497	0.041667	0.214286	0.440476	0.64881	0.964286	0.011905	0.244048	0.5	0.821429	1	0.005952	0.267857	0.535714	0.72619	0.994048	0.35119	0.017857	0.630952	0.011976	0.083832	0.011976	0.005952	0.095238	0.339286	0.797619	1	0.077381	0.077381	0.077381	0.083333	0.720238	0.119048	0.303571	0.535714	0.744048	0.940476	0.52381	0.39521	0.02381	0.267857	0.535714	0.744048	0.994048	0.428571
0.269355	0.485484	0.245161	0.26979	0.135703	0.263328	0.009677	0.224194	0.493548	0.746774	1	0.003226	0.279032	0.506452	0.756452	0.998387	0.001613	0.203226	0.483871	0.724194	0.995161	0.670968	0.082258	0.246774	0.029079	0.048465	0.003231	0.001613	0.359677	0.541935	0.790323	1	0.1	0.654839	0.717742	0.795161	0.859677	0.003226	0.072581	0.180645	0.333871	0.877419	0.446774	0.390953	0.004839	0.235484	0.559677	0.785484	0.987097	0.495161
0.350087	0.393414	0.256499	0.25	0.177083	0.204861	0.003466	0.279029	0.558059	0.759099	0.998267	0.008666	0.256499	0.461005	0.738302	0.996534	0.001733	0.214905	0.462738	0.740035	1	0.686308	0.117851	0.195841	0.059028	0.072917	0.003472	0.001733	0.275563	0.485269	0.7487	1	0.005199	0.155979	0.379549	0.655113	0.911612	0.031196	0.140381	0.544194	0.897747	0.991334	0.403813	0.399306	0.005199	0.239168	0.516464	0.783362	0.986135	0.40208
0.415042	0.231198	0.35376	0.165969	0.324965	0.182706	0.008357	0.236769	0.513928	0.756267	0.998607	0.005571	0.266017	0.504178	0.735376	0.994429	0.001393	0.231198	0.470752	0.739554	1	0.469359	0.224234	0.306407	0.093445	0.059972	0.004184	0.001393	0.204735	0.430362	0.707521	1	0.045961	0.192201	0.456825	0.845404	0.979109	0.006964	0.348189	0.575209	0.735376	0.997214	0.573816	0.407252	0.004178	0.253482	0.491643	0.746518	0.997214	0.256267
0.262948	0.430279	0.306773	0.205589	0.165669	0.269461	0.00996	0.260956	0.569721	0.762948	0.992032	0.003984	0.233068	0.448207	0.760956	0.998008	0.001992	0.272908	0.523904	0.723108	1	0.464143	0.053785	0.482072	0.031936	0.087824	0	0.001992	0.223108	0.50996	0.826693	1	0.005976	0.103586	0.207171	0.958167	0.978088	0.031873	0.330677	0.498008	0.667331	0.918327	0.507968	0.359281	0.005976	0.298805	0.494024	0.669323	0.99004	0.444223
0.411765	0.235294	0.352941	0.223881	0.283582	0.104478	0.044118	0.294118	0.588235	0.808824	0.985294	0.029412	0.25	0.411765	0.705882	0.970588	0.014706	0.191176	0.441176	0.617647	1	0.485294	0.161765	0.352941	0.149254	0.059701	0	0.014706	0.147059	0.279412	0.661765	1	0.058824	0.088235	0.308824	0.426471	0.470588	0.514706	0.588235	0.735294	0.823529	0.911765	0.323529	0.447761	0.058824	0.205882	0.426471	0.602941	0.838235	0.338235
0.344538	0.367647	0.287815	0.242105	0.2	0.185263	0.004202	0.25	0.476891	0.743697	0.995798	0.008403	0.228992	0.491597	0.726891	1	0.002101	0.258403	0.537815	0.773109	0.968487	0.558824	0.197479	0.243697	0.067368	0.054737	0	0.002101	0.231092	0.497899	0.741597	1	0.056723	0.210084	0.409664	0.82563	0.968487	0.079832	0.359244	0.548319	0.75	0.995798	0.47479	0.353684	0.014706	0.310924	0.533613	0.756303	0.970588	0.380252
0.250755	0.425982	0.323263	0.187879	0.178788	0.272727	0.006042	0.259819	0.528701	0.776435	1	0.012085	0.205438	0.471299	0.703927	0.996979	0.003021	0.265861	0.486405	0.746224	0.978852	0.601208	0.256798	0.141994	0.075758	0.039394	0.00303	0.003021	0.175227	0.519637	0.773414	1	0.012085	0.274924	0.410876	0.628399	0.930514	0.033233	0.335347	0.483384	0.734139	0.978852	0.577039	0.345455	0.012085	0.232628	0.438066	0.673716	0.978852	0.444109
0.342672	0.418103	0.239224	0.306695	0.181425	0.168467	0.00431	0.200431	0.463362	0.719828	0.99569	0.006466	0.273707	0.579741	0.765086	0.997845	0.002155	0.232759	0.420259	0.726293	1	0.661638	0.157328	0.181034	0.069114	0.034557	0	0.002155	0.280172	0.545259	0.730603	1	0.017241	0.165948	0.344828	0.838362	0.943966	0.06681	0.224138	0.4375	0.885776	0.982759	0.493534	0.362851	0.021552	0.338362	0.549569	0.726293	0.980603	0.459052
0.312253	0.371542	0.316206	0.230159	0.178571	0.246032	0.011858	0.185771	0.391304	0.774704	1	0.007905	0.332016	0.541502	0.72332	0.996047	0.003953	0.252964	0.490119	0.719368	0.992095	0.387352	0.01581	0.596838	0.003968	0.138889	0.011905	0.003953	0.328063	0.537549	0.648221	1	0.422925	0.422925	0.426877	0.494071	0.498024	0.01581	0.177866	0.44664	0.778656	0.992095	0.545455	0.388889	0.023715	0.26087	0.505929	0.699605	0.976285	0.403162
0.302041	0.412245	0.285714	0.237705	0.20082	0.221311	0.020408	0.191837	0.42449	0.75102	1	0.008163	0.244898	0.485714	0.714286	0.995918	0.004082	0.289796	0.567347	0.771429	0.991837	0.485714	0.257143	0.257143	0.07377	0.065574	0	0.004082	0.232653	0.379592	0.677551	1	0.089796	0.187755	0.497959	0.673469	0.820408	0.012245	0.461224	0.722449	0.902041	0.987755	0.595918	0.344262	0.016327	0.306122	0.530612	0.722449	0.991837	0.440816
0.341463	0.296167	0.362369	0.192308	0.22028	0.255245	0.006969	0.261324	0.519164	0.770035	0.993031	0.017422	0.195122	0.466899	0.724739	0.996516	0.003484	0.296167	0.512195	0.735192	1	0.400697	0.236934	0.362369	0.076923	0.055944	0	0.003484	0.191638	0.452962	0.658537	1	0.020906	0.1777	0.421603	0.801394	0.982578	0.069686	0.362369	0.567944	0.839721	0.933798	0.581882	0.328671	0.017422	0.212544	0.442509	0.71777	0.982578	0.264808
0.344749	0.424658	0.230594	0.279176	0.173913	0.196796	0.004566	0.30137	0.570776	0.787671	0.997717	0.006849	0.194064	0.388128	0.728311	0.993151	0.002283	0.351598	0.538813	0.703196	1	0.671233	0.041096	0.287671	0.02746	0.050343	0	0.002283	0.187215	0.356164	0.753425	1	0.041096	0.047945	0.860731	0.869863	0.965753	0.009132	0.525114	0.614155	0.728311	0.90411	0.390411	0.356979	0.013699	0.26484	0.497717	0.684932	0.984018	0.383562
0.311475	0.459016	0.229508	0.249315	0.150685	0.208219	0.005464	0.251366	0.461749	0.79235	0.994536	0.008197	0.259563	0.581967	0.748634	1	0.002732	0.221311	0.418033	0.631148	0.95082	0.860656	0.035519	0.103825	0.016438	0.038356	0.005479	0.002732	0.275956	0.540984	0.756831	1	0.016393	0.021858	0.297814	0.39071	0.885246	0.106557	0.139344	0.191257	0.461749	0.986339	0.363388	0.361644	0.008197	0.18306	0.47541	0.713115	0.980874	0.486339
0.41	0.25	0.34	0.151515	0.252525	0.161616	0.06	0.31	0.53	0.77	0.98	0.03	0.17	0.4	0.56	1	0.01	0.22	0.49	0.72	0.99	0.47	0.53	0	0.181818	0	0	0.01	0.3	0.53	0.8	1	0.02	0.19	0.38	0.69	0.97	0	0	0	0	0	0.36	0.484848	0.02	0.2	0.45	0.71	0.96	0.26
0.343023	0.488372	0.168605	0.303207	0.139942	0.107872	0.008721	0.203488	0.436047	0.630814	0.994186	0.005814	0.284884	0.659884	0.822674	1	0.002907	0.247093	0.415698	0.534884	0.947674	0.712209	0.168605	0.119186	0.061224	0.03207	0.002915	0.002907	0.194767	0.642442	0.819767	1	0.165698	0.27907	0.375	0.517442	0.613372	0.162791	0.223837	0.331395	0.459302	0.630814	0.514535	0.268222	0.046512	0.40407	0.697674	0.825581	0.994186	0.488372
0.438392	0.299611	0.261997	0.250649	0.218182	0.164935	0.003891	0.203632	0.478599	0.785992	1	0.002594	0.287938	0.474708	0.7393	0.994812	0.001297	0.354086	0.542153	0.721141	0.984436	0.523995	0.119326	0.35668	0.042857	0.066234	0.003896	0.001297	0.154345	0.289235	0.609598	1	0.029831	0.466926	0.601816	0.726329	0.907912	0.042802	0.453956	0.674449	0.856031	0.98703	0.404669	0.309091	0.014267	0.394293	0.538262	0.731518	0.985733	0.355383
0.315855	0.314607	0.369538	0.16625	0.25625	0.2475	0.006242	0.282147	0.526841	0.762797	0.998752	0.004994	0.23221	0.478152	0.736579	1	0.001248	0.230961	0.483146	0.745318	0.997503	0.475655	0.227216	0.297129	0.08875	0.05875	0.00625	0.001248	0.214732	0.453184	0.742821	1	0.03995	0.173533	0.414482	0.805243	0.997503	0.006242	0.343321	0.569288	0.732834	0.991261	0.570537	0.395	0.003745	0.260924	0.469413	0.736579	0.997503	0.333333
0.402299	0.229885	0.367816	0.244186	0.360465	0.127907	0.034483	0.241379	0.425287	0.666667	0.977011	0.126437	0.264368	0.655172	0.770115	0.931034	0.011494	0.172414	0.494253	0.804598	1	0.45977	0.310345	0.229885	0.116279	0.046512	0	0.011494	0.241379	0.666667	0.804598	1	0.045977	0.275862	0.574713	0.712644	0.896552	0.137931	0.183908	0.390805	0.448276	0.505747	0.344828	0.395349	0.045977	0.16092	0.448276	0.597701	0.965517	0.218391
0.340716	0.425894	0.23339	0.242321	0.158703	0.204778	0.005111	0.192504	0.449744	0.763203	1	0.006814	0.327087	0.536627	0.703578	0.998296	0.001704	0.218058	0.454855	0.79046	0.994889	0.621806	0.11414	0.264055	0.042662	0.069966	0.005119	0.001704	0.277683	0.529813	0.715503	1	0.093697	0.235094	0.340716	0.599659	0.994889	0.010221	0.192504	0.454855	0.795571	0.993186	0.402044	0.337884	0.010221	0.27598	0.446337	0.720613	0.984668	0.415673
0.400915	0.306402	0.292683	0.225954	0.206107	0.174046	0.009146	0.179878	0.448171	0.757622	1	0.003049	0.256098	0.47561	0.731707	0.993902	0.001524	0.342988	0.570122	0.76372	0.998476	0.286585	0.004573	0.708841	0.00458	0.117557	0.001527	0.001524	0.152439	0.484756	0.817073	1	0.02439	0.02439	0.02439	0.045732	0.047256	0.022866	0.286585	0.501524	0.731707	0.996951	0.507622	0.39084	0.006098	0.32622	0.525915	0.746951	0.996951	0.318598
0.374172	0.304636	0.321192	0.232558	0.259136	0.192691	0.009934	0.304636	0.516556	0.764901	0.996689	0.006623	0.178808	0.506623	0.778146	0.990066	0.003311	0.228477	0.453642	0.695364	1	0.5	0.195364	0.304636	0.07309	0.046512	0.019934	0.003311	0.304636	0.582781	0.824503	1	0.072848	0.142384	0.569536	0.695364	0.887417	0.029801	0.245033	0.377483	0.559603	0.870861	0.427152	0.358804	0.023179	0.235099	0.496689	0.675497	0.950331	0.360927
0.337134	0.338762	0.324104	0.215159	0.226569	0.203749	0.001629	0.267915	0.548046	0.824104	0.999186	0.0057	0.245928	0.502443	0.732085	0.996743	0.000814	0.232899	0.459283	0.693811	1	0.324919	0.021987	0.653094	0.012225	0.106764	0.002445	0.000814	0.280945	0.577362	0.888436	1	0.006515	0.88355	0.925896	0.947068	0.960912	0.004072	0.23127	0.460912	0.672638	0.997557	0.496743	0.378158	0.004886	0.233713	0.440554	0.679153	0.995114	0.367264
0.297483	0.359268	0.343249	0.194954	0.197248	0.21789	0.016018	0.299771	0.540046	0.782609	1	0.004577	0.19222	0.448513	0.709382	0.988558	0.002288	0.258581	0.501144	0.759725	0.997712	0.432494	0.162471	0.405034	0.052752	0.084862	0.002294	0.002288	0.203661	0.405034	0.684211	1	0.128146	0.356979	0.533181	0.87643	0.997712	0.01373	0.221968	0.560641	0.791762	0.965675	0.569794	0.302752	0.016018	0.263158	0.466819	0.732265	0.995423	0.372998
0.382812	0.257812	0.359375	0.173228	0.275591	0.188976	0.023438	0.296875	0.554688	0.804688	1	0.03125	0.1875	0.367188	0.585938	0.984375	0.007812	0.25	0.53125	0.71875	0.929688	0.421875	0.148438	0.429688	0.062992	0.07874	0	0.007812	0.140625	0.359375	0.742188	1	0.125	0.296875	0.390625	0.429688	0.726562	0.0625	0.460938	0.570312	0.828125	0.9375	0.40625	0.393701	0.046875	0.328125	0.523438	0.703125	0.929688	0.234375
0.376494	0.340637	0.282869	0.225549	0.213573	0.217565	0.003984	0.227092	0.51992	0.75498	0.994024	0.011952	0.260956	0.505976	0.729084	0.988048	0.001992	0.23506	0.464143	0.739044	1	0.511952	0.205179	0.282869	0.083832	0.051896	0	0.001992	0.241036	0.50996	0.798805	1	0.02988	0.173307	0.38247	0.59761	0.996016	0.053785	0.304781	0.569721	0.772908	0.98008	0.496016	0.335329	0.027888	0.268924	0.543825	0.800797	0.978088	0.344622
0.370771	0.373478	0.255751	0.254743	0.153117	0.189702	0.002706	0.285521	0.571042	0.779432	1	0.00406	0.294993	0.549391	0.753721	0.998647	0.001353	0.181326	0.343708	0.618403	0.994587	0.525034	0.062246	0.41272	0.02981	0.070461	0	0.001353	0.41272	0.663058	0.794317	1	0.009472	0.054127	0.14885	0.656292	0.967524	0.027064	0.209743	0.366712	0.504736	0.997294	0.453315	0.352304	0.010825	0.227334	0.37889	0.656292	0.994587	0.389716
0.367758	0.269521	0.36272	0.204545	0.262626	0.194444	0.007557	0.198992	0.438287	0.725441	1	0.020151	0.241814	0.534005	0.763224	0.994962	0.002519	0.292191	0.508816	0.778338	0.997481	0.413098	0.100756	0.486146	0.045455	0.09596	0.010101	0.002519	0.168766	0.460957	0.707809	1	0.11335	0.559194	0.70529	0.861461	0.957179	0.007557	0.282116	0.443325	0.730479	0.984887	0.478589	0.368687	0.005038	0.370277	0.576826	0.793451	0.984887	0.304786
0.330189	0.396226	0.273585	0.2	0.219048	0.219048	0.037736	0.264151	0.433962	0.716981	0.990566	0.018868	0.245283	0.59434	0.858491	0.981132	0.009434	0.179245	0.424528	0.613208	1	0.415094	0.04717	0.537736	0.019048	0.114286	0	0.009434	0.301887	0.716981	0.896226	1	0.613208	0.613208	0.622642	0.632075	0.650943	0.037736	0.179245	0.377358	0.509434	0.830189	0.330189	0.380952	0.04717	0.198113	0.386792	0.603774	0.830189	0.415094
0.269231	0.418269	0.3125	0.198068	0.236715	0.222222	0.009615	0.230769	0.427885	0.716346	0.985577	0.019231	0.192308	0.552885	0.822115	1	0.004808	0.298077	0.5	0.6875	0.913462	0.442308	0.4375	0.120192	0.130435	0.043478	0.004831	0.004808	0.302885	0.581731	0.826923	1	0.019231	0.3125	0.495192	0.658654	0.908654	0.081731	0.105769	0.235577	0.278846	0.971154	0.427885	0.454106	0.024038	0.254808	0.456731	0.677885	0.913462	0.399038
0.325967	0.314917	0.359116	0.183333	0.25	0.216667	0.016575	0.171271	0.364641	0.718232	0.977901	0.033149	0.342541	0.59116	0.723757	0.98895	0.005525	0.270718	0.458564	0.740331	1	0.486188	0.292818	0.220994	0.111111	0.055556	0	0.005525	0.237569	0.497238	0.696133	1	0.265193	0.342541	0.635359	0.823204	0.994475	0.099448	0.149171	0.226519	0.552486	0.872928	0.530387	0.411111	0.027624	0.375691	0.563536	0.78453	0.994475	0.337017
0.391129	0.403226	0.205645	0.275304	0.190283	0.161943	0.012097	0.306452	0.540323	0.790323	1	0.008065	0.165323	0.5	0.717742	0.959677	0.004032	0.262097	0.423387	0.725806	0.979839	0.762097	0.104839	0.133065	0.040486	0.040486	0	0.004032	0.217742	0.560484	0.75	1	0.048387	0.185484	0.294355	0.350806	0.459677	0.221774	0.25	0.391129	0.895161	0.991935	0.407258	0.380567	0.016129	0.193548	0.395161	0.649194	0.979839	0.483871
0.37218	0.342105	0.285714	0.279245	0.2	0.166038	0.007519	0.259398	0.578947	0.808271	1	0.018797	0.236842	0.466165	0.770677	0.992481	0.003759	0.203008	0.443609	0.62406	0.921053	0.296992	0.097744	0.605263	0.033962	0.09434	0.003774	0.003759	0.146617	0.575188	0.857143	1	0.112782	0.669173	0.710526	0.733083	0.766917	0.018797	0.225564	0.43985	0.620301	0.928571	0.43985	0.316981	0.011278	0.191729	0.413534	0.590226	0.921053	0.345865
0.338942	0.334135	0.326923	0.231325	0.243373	0.255422	0.007212	0.269231	0.5	0.740385	1	0.014423	0.216346	0.463942	0.745192	0.997596	0.002404	0.252404	0.524038	0.752404	0.995192	0.370192	0.141827	0.487981	0.062651	0.096386	0.004819	0.002404	0.242788	0.557692	0.807692	1	0.112981	0.204327	0.564904	0.915865	0.997596	0.004808	0.257212	0.449519	0.716346	0.954327	0.574519	0.375904	0.012019	0.223558	0.480769	0.6875	0.995192	0.367788
0.4	0.333333	0.266667	0.244094	0.228346	0.216535	0.011765	0.278431	0.47451	0.709804	0.988235	0.007843	0.223529	0.478431	0.760784	1	0.003922	0.262745	0.537255	0.780392	0.996078	0.396078	0.223529	0.380392	0.070866	0.055118	0	0.003922	0.231373	0.454902	0.792157	1	0.039216	0.270588	0.352941	0.772549	0.992157	0.109804	0.2	0.529412	0.698039	0.882353	0.501961	0.425197	0.019608	0.243137	0.537255	0.784314	0.976471	0.286275
0.295669	0.404896	0.299435	0.273585	0.167925	0.273585	0.003766	0.210923	0.451977	0.72693	0.998117	0.013183	0.26742	0.506591	0.745763	0.996234	0.001883	0.250471	0.512241	0.747646	1	0.399247	0.07533	0.525424	0.030189	0.09434	0.003774	0.001883	0.244821	0.610169	0.79096	1	0.05838	0.681733	0.766478	0.919021	0.964218	0.00565	0.239171	0.436911	0.606403	0.992467	0.595104	0.369811	0.007533	0.274953	0.525424	0.762712	0.990584	0.444444
0.299383	0.373457	0.32716	0.198142	0.198142	0.250774	0.006173	0.225309	0.518519	0.777778	0.990741	0.009259	0.259259	0.478395	0.712963	1	0.003086	0.231481	0.503086	0.75	0.993827	0.567901	0.197531	0.234568	0.086687	0.06192	0.012384	0.003086	0.287037	0.490741	0.759259	1	0.070988	0.268519	0.432099	0.567901	0.944444	0.021605	0.185185	0.62037	0.737654	0.885802	0.617284	0.315789	0.012346	0.253086	0.512346	0.731481	0.993827	0.376543
0.393862	0.294118	0.31202	0.194872	0.266667	0.2	0.007673	0.232737	0.462916	0.716113	0.997442	0.005115	0.240409	0.534527	0.769821	0.97954	0.002558	0.28133	0.514066	0.734015	1	0.40665	0.396419	0.196931	0.105128	0.053846	0.017949	0.002558	0.245524	0.526854	0.767263	1	0.046036	0.219949	0.501279	0.7289	0.953964	0.007673	0.250639	0.475703	0.887468	0.992327	0.450128	0.405128	0.012788	0.283887	0.521739	0.731458	0.987212	0.329923
0.299258	0.459604	0.241138	0.276289	0.12701	0.23134	0.001649	0.273289	0.622836	0.805853	0.999588	0.000824	0.248557	0.471558	0.702391	1	0.000412	0.234542	0.459604	0.686727	0.998763	0.73413	0.064303	0.201566	0.036289	0.065979	0.002474	0.000412	0.210635	0.402721	0.681781	1	0.037923	0.560594	0.607997	0.677659	0.998763	0.002061	0.430338	0.736191	0.838829	0.981451	0.363561	0.256495	0.002061	0.334295	0.435697	0.642209	0.998763	0.472795
0.296073	0.429003	0.274924	0.239394	0.190909	0.215152	0.006042	0.244713	0.477341	0.746224	0.996979	0.015106	0.326284	0.516616	0.803625	0.990937	0.003021	0.202417	0.401813	0.667674	1	0.513595	0.148036	0.338369	0.051515	0.057576	0.009091	0.003021	0.280967	0.486405	0.797583	1	0.057402	0.114804	0.537764	0.670695	0.78852	0.021148	0.241692	0.432024	0.722054	0.951662	0.41994	0.406061	0.015106	0.214502	0.486405	0.688822	0.987915	0.480363
0.328294	0.315335	0.356371	0.19697	0.225108	0.244589	0.008639	0.25486	0.511879	0.764579	1	0.00432	0.235421	0.526998	0.766739	0.99568	0.00216	0.237581	0.483801	0.693305	0.99784	0.401728	0.146868	0.451404	0.051948	0.090909	0.004329	0.00216	0.263499	0.526998	0.775378	1	0.095032	0.269978	0.444924	0.62851	0.734341	0.012959	0.209503	0.531317	0.790497	0.993521	0.552916	0.363636	0.012959	0.226782	0.447084	0.684665	0.974082	0.343413
0.398148	0.25	0.351852	0.186916	0.271028	0.242991	0.018519	0.203704	0.518519	0.768519	1	0.074074	0.185185	0.407407	0.657407	0.925926	0.009259	0.259259	0.490741	0.740741	0.990741	0.361111	0.194444	0.444444	0.074766	0.056075	0	0.009259	0.175926	0.324074	0.777778	1	0.055556	0.268519	0.37037	0.416667	0.759259	0.101852	0.462963	0.574074	0.842593	0.953704	0.481481	0.373832	0.064815	0.305556	0.5	0.722222	0.962963	0.231481
0.443182	0.227273	0.329545	0.218391	0.356322	0.126437	0.022727	0.227273	0.5	0.738636	0.988636	0.068182	0.261364	0.431818	0.818182	0.931818	0.011364	0.204545	0.488636	0.659091	1	0.329545	0.238636	0.431818	0.08046	0.057471	0.011494	0.011364	0.409091	0.488636	0.761364	1	0.306818	0.375	0.545455	0.636364	0.704545	0.034091	0.125	0.238636	0.806818	0.920455	0.375	0.482759	0.034091	0.136364	0.295455	0.579545	0.897727	0.272727
0.519048	0.309524	0.171429	0.358852	0.196172	0.105263	0.014286	0.338095	0.604762	0.8	0.995238	0.009524	0.22381	0.404762	0.62381	1	0.004762	0.157143	0.357143	0.595238	0.980952	0.690476	0.142857	0.166667	0.047847	0.028708	0.009569	0.004762	0.480952	0.652381	0.82381	1	0.028571	0.057143	0.247619	0.309524	0.452381	0.090476	0.12381	0.166667	0.37619	0.433333	0.238095	0.191388	0.033333	0.119048	0.252381	0.357143	0.447619	0.328571
0.35	0.377273	0.272727	0.242792	0.197269	0.212443	0.00303	0.233333	0.424242	0.739394	0.99697	0.006061	0.254545	0.574242	0.806061	0.995455	0.001515	0.20303	0.457576	0.674242	1	0.472727	0.127273	0.4	0.047041	0.08346	0.007587	0.001515	0.29697	0.607576	0.842424	1	0.036364	0.128788	0.345455	0.654545	0.990909	0.010606	0.263636	0.436364	0.625758	0.989394	0.509091	0.358118	0.004545	0.215152	0.475758	0.681818	0.993939	0.390909
0.427332	0.264642	0.308026	0.230435	0.263043	0.143478	0.013015	0.225597	0.442516	0.698482	1	0.017354	0.249458	0.590022	0.770065	0.993492	0.002169	0.27115	0.524946	0.767896	0.997831	0.409978	0.106291	0.483731	0.043478	0.121739	0.008696	0.002169	0.18872	0.403471	0.687636	1	0.004338	0.498915	0.691974	0.839479	0.97397	0.032538	0.299349	0.4859	0.735358	0.997831	0.440347	0.36087	0.004338	0.444685	0.633406	0.819957	0.995662	0.279826
0.335938	0.390625	0.273438	0.267717	0.15748	0.244094	0.023438	0.210938	0.398438	0.71875	0.992188	0.015625	0.21875	0.539062	0.773438	1	0.007812	0.28125	0.554688	0.734375	0.960938	0.242188	0.046875	0.710938	0.015748	0.07874	0	0.007812	0.054688	0.5625	0.703125	1	0.945312	0.945312	0.960938	0.96875	0.984375	0.0625	0.28125	0.460938	0.71875	0.914062	0.445312	0.456693	0.03125	0.328125	0.523438	0.742188	0.96875	0.375
0.209644	0.561845	0.228512	0.178571	0.119748	0.245798	0.041929	0.381551	0.607966	0.750524	0.995807	0.006289	0.24109	0.454927	0.731656	0.997904	0.002096	0.184486	0.494759	0.767296	1	0.624738	0.083857	0.291405	0.069328	0.073529	0.002101	0.002096	0.266247	0.471698	0.761006	1	0.102725	0.316562	0.559748	0.645702	0.972746	0.033543	0.238994	0.505241	0.752621	0.937107	0.33543	0.508403	0.008386	0.165618	0.473795	0.725367	0.993711	0.559748
0.379015	0.375803	0.245182	0.285102	0.181136	0.180064	0.003212	0.310493	0.594218	0.804069	1	0.002141	0.233405	0.475375	0.755889	0.994647	0.001071	0.223769	0.421842	0.624197	0.981799	0.541756	0.114561	0.343683	0.049303	0.085745	0.004287	0.001071	0.182013	0.533191	0.771949	1	0.093148	0.266595	0.431478	0.656317	0.87152	0.108137	0.283726	0.518201	0.680942	0.996788	0.395075	0.323687	0.005353	0.218415	0.404711	0.583512	0.979657	0.404711
0.403226	0.33871	0.258065	0.275676	0.194595	0.221622	0.016129	0.22043	0.505376	0.817204	1	0.010753	0.236559	0.456989	0.715054	0.973118	0.005376	0.344086	0.516129	0.72043	0.983871	0.333333	0.11828	0.548387	0.07027	0.07027	0.005405	0.005376	0.112903	0.446237	0.693548	1	0.043011	0.064516	0.473118	0.763441	0.822581	0.188172	0.317204	0.564516	0.844086	0.983871	0.408602	0.4	0.048387	0.408602	0.553763	0.752688	0.983871	0.360215
0.475129	0.307033	0.217839	0.248927	0.183691	0.142489	0.001715	0.144082	0.324185	0.642367	0.996569	0.005146	0.370497	0.614923	0.846484	0.998285	0.000858	0.435678	0.593482	0.754717	1	0.505146	0.107204	0.38765	0.046352	0.077253	0.00515	0.000858	0.20669	0.392796	0.686106	1	0.002573	0.543739	0.64494	0.750429	0.999142	0.012864	0.251286	0.556604	0.805317	0.988851	0.349914	0.291845	0.006861	0.483705	0.61235	0.755575	0.997427	0.367067
0.332898	0.402089	0.265013	0.235294	0.181699	0.188235	0.003916	0.263708	0.505222	0.738903	1	0.002611	0.18799	0.443864	0.766319	0.998695	0.001305	0.355091	0.537859	0.741514	0.993473	0.556136	0.120104	0.32376	0.047059	0.099346	0.005229	0.001305	0.193211	0.455614	0.793734	1	0.011749	0.519582	0.655352	0.727154	0.949086	0.009138	0.266319	0.468668	0.680157	0.98564	0.506527	0.420915	0.009138	0.253264	0.544386	0.75718	0.993473	0.385117
0.344828	0.403941	0.251232	0.341584	0.207921	0.193069	0.014778	0.280788	0.527094	0.812808	1	0.009852	0.251232	0.482759	0.70936	0.985222	0.004926	0.17734	0.448276	0.684729	0.960591	0.413793	0.369458	0.216749	0.148515	0.039604	0	0.004926	0.197044	0.576355	0.866995	1	0.044335	0.172414	0.541872	0.694581	0.975369	0.285714	0.418719	0.472906	0.807882	0.862069	0.438424	0.485149	0.019704	0.29064	0.502463	0.674877	0.960591	0.403941
0.358108	0.378378	0.263514	0.333333	0.210884	0.136054	0.054054	0.331081	0.540541	0.702703	0.993243	0.02027	0.22973	0.614865	0.831081	1	0.006757	0.128378	0.304054	0.513514	0.871622	0.506757	0.371622	0.121622	0.108844	0.027211	0	0.006757	0.425676	0.675676	0.810811	1	0.094595	0.189189	0.304054	0.452703	0.871622	0.027027	0.047297	0.5	0.527027	0.560811	0.47973	0.367347	0.02027	0.243243	0.452703	0.817568	0.986486	0.412162
0.311828	0.365591	0.322581	0.23913	0.184783	0.195652	0.043011	0.16129	0.451613	0.774194	1	0.021505	0.268817	0.645161	0.817204	0.978495	0.010753	0.258065	0.408602	0.602151	0.892473	0.505376	0.333333	0.16129	0.108696	0.043478	0.021739	0.010753	0.247312	0.731183	0.870968	1	0.258065	0.365591	0.483871	0.591398	0.774194	0.032258	0.107527	0.150538	0.193548	0.655914	0.451613	0.304348	0.096774	0.290323	0.451613	0.634409	0.903226	0.387097
0.314685	0.376224	0.309091	0.2493	0.194678	0.235294	0.002797	0.267133	0.551049	0.774825	1	0.008392	0.21958	0.454545	0.723077	0.995804	0.001399	0.274126	0.48951	0.728671	0.998601	0.398601	0.18042	0.420979	0.088235	0.077031	0.004202	0.001399	0.278322	0.518881	0.827972	1	0.004196	0.186014	0.360839	0.87972	0.997203	0.039161	0.286713	0.534266	0.668531	0.927273	0.524476	0.383754	0.006993	0.246154	0.46014	0.681119	0.998601	0.376224
0.417323	0.314961	0.267717	0.238095	0.246032	0.111111	0.015748	0.251969	0.433071	0.716535	1	0.03937	0.220472	0.362205	0.771654	0.992126	0.007874	0.299213	0.574803	0.732283	0.984252	0.259843	0	0.740157	0	0.079365	0	0.007874	0.181102	0.669291	0.929134	1	0	0	0	0	0	0.047244	0.267717	0.456693	0.716535	0.92126	0.433071	0.492063	0.023622	0.307087	0.511811	0.716535	0.984252	0.283465
0.33526	0.346821	0.317919	0.215116	0.238372	0.215116	0.017341	0.236994	0.450867	0.722543	0.99422	0.011561	0.219653	0.485549	0.745665	0.982659	0.00578	0.242775	0.526012	0.751445	1	0.462428	0.127168	0.410405	0.05814	0.104651	0.023256	0.00578	0.156069	0.595376	0.780347	1	0.283237	0.346821	0.699422	0.745665	0.988439	0.046243	0.312139	0.445087	0.566474	0.930636	0.462428	0.430233	0.023121	0.404624	0.572254	0.710983	0.988439	0.306358
0.353535	0.40404	0.242424	0.234694	0.193878	0.204082	0.050505	0.20202	0.383838	0.717172	0.959596	0.020202	0.242424	0.565657	0.686869	1	0.010101	0.353535	0.505051	0.818182	0.989899	0.474747	0.323232	0.20202	0.142857	0.040816	0	0.010101	0.292929	0.686869	0.878788	1	0.030303	0.242424	0.515152	0.646465	0.818182	0.111111	0.151515	0.333333	0.383838	0.434343	0.393939	0.387755	0.030303	0.222222	0.454545	0.767677	0.979798	0.383838
0.325109	0.362845	0.312046	0.231105	0.229651	0.204942	0.002903	0.267054	0.489115	0.751814	1	0.005806	0.223512	0.49492	0.748911	0.998549	0.001451	0.236575	0.503628	0.740203	0.991292	0.442671	0.149492	0.407837	0.050872	0.088663	0.001453	0.001451	0.245283	0.552975	0.764877	1	0.044993	0.153846	0.413643	0.773585	0.994194	0.013062	0.313498	0.49492	0.711176	0.984035	0.496372	0.360465	0.01016	0.236575	0.526851	0.734398	0.995646	0.384615
0.372881	0.355932	0.271186	0.264957	0.273504	0.145299	0.025424	0.220339	0.491525	0.711864	1	0.042373	0.305085	0.533898	0.855932	0.991525	0.008475	0.169492	0.372881	0.644068	0.915254	0.389831	0.262712	0.347458	0.068376	0.08547	0.017094	0.008475	0.29661	0.576271	0.847458	1	0.042373	0.09322	0.415254	0.533898	0.788136	0.144068	0.220339	0.601695	0.711864	0.974576	0.440678	0.410256	0.016949	0.194915	0.432203	0.644068	0.889831	0.381356
0.4	0.285714	0.314286	0.259615	0.221154	0.173077	0.028571	0.32381	0.552381	0.771429	0.990476	0.019048	0.266667	0.428571	0.752381	1	0.009524	0.180952	0.409524	0.695238	0.933333	0.361905	0.390476	0.247619	0.086538	0.009615	0.009615	0.009524	0.27619	0.466667	0.609524	1	0.038095	0.171429	0.266667	0.409524	0.704762	0.714286	0.761905	0.828571	0.885714	0.952381	0.390476	0.538462	0.057143	0.2	0.466667	0.72381	0.933333	0.257143
0.318428	0.375339	0.306233	0.225237	0.204885	0.257802	0.00271	0.239837	0.468835	0.742547	1	0.00813	0.234417	0.498645	0.757453	0.99458	0.001355	0.283198	0.525745	0.739837	0.99729	0.485095	0.109756	0.405149	0.061058	0.080054	0.001357	0.001355	0.288618	0.574526	0.795393	1	0.135501	0.227642	0.542005	0.753388	0.95664	0.023035	0.241192	0.394309	0.659892	0.993225	0.487805	0.474898	0.004065	0.260163	0.52439	0.772358	0.99729	0.415989
0.376645	0.320724	0.302632	0.230643	0.248764	0.181219	0.004934	0.225329	0.427632	0.725329	1	0.003289	0.305921	0.527961	0.753289	0.995066	0.001645	0.220395	0.557566	0.758224	0.996711	0.462171	0.131579	0.40625	0.051071	0.103789	0.001647	0.001645	0.335526	0.5625	0.805921	1	0.164474	0.268092	0.675987	0.810855	0.929276	0.006579	0.144737	0.361842	0.618421	0.991776	0.434211	0.401977	0.011513	0.291118	0.590461	0.782895	0.996711	0.383224
0.340659	0.395604	0.263736	0.355556	0.144444	0.2	0.043956	0.186813	0.43956	0.725275	1	0.021978	0.197802	0.516484	0.714286	0.989011	0.010989	0.32967	0.56044	0.747253	0.967033	0.593407	0.373626	0.032967	0.155556	0.022222	0	0.010989	0.142857	0.362637	0.593407	1	0.252747	0.395604	0.659341	0.769231	0.912088	0.945055	0.945055	0.945055	0.956044	0.967033	0.395604	0.333333	0.098901	0.384615	0.516484	0.67033	0.912088	0.406593
0.393443	0.360656	0.245902	0.366667	0.166667	0.15	0.04918	0.213115	0.459016	0.737705	0.967213	0.032787	0.163934	0.327869	0.606557	1	0.016393	0.42623	0.672131	0.770492	0.934426	0.639344	0.016393	0.344262	0.033333	0.1	0	0.016393	0.147541	0.360656	0.540984	1	0.442623	0.442623	0.442623	0.442623	0.442623	0.278689	0.590164	0.704918	0.786885	0.885246	0.311475	0.366667	0.344262	0.47541	0.655738	0.770492	0.934426	0.442623
0.415385	0.292308	0.292308	0.248062	0.286822	0.20155	0.030769	0.223077	0.476923	0.738462	1	0.023077	0.230769	0.538462	0.746154	0.992308	0.007692	0.238462	0.484615	0.676923	0.915385	0.484615	0.238462	0.276923	0.077519	0.062016	0	0.007692	0.123077	0.407692	0.738462	1	0.146154	0.192308	0.507692	0.861538	0.923077	0.084615	0.346154	0.661538	0.730769	0.815385	0.361538	0.372093	0.161538	0.315385	0.561538	0.715385	0.915385	0.269231
0.281893	0.465021	0.253086	0.226804	0.152577	0.249485	0.00823	0.240741	0.419753	0.769547	0.995885	0.004115	0.271605	0.549383	0.746914	1	0.002058	0.211934	0.471193	0.734568	0.979424	0.633745	0.158436	0.207819	0.061856	0.065979	0	0.002058	0.251029	0.567901	0.736626	1	0.004115	0.179012	0.366255	0.465021	0.979424	0.13786	0.290123	0.487654	0.790123	0.950617	0.580247	0.247423	0.006173	0.403292	0.611111	0.771605	0.979424	0.465021
0.348985	0.376904	0.274112	0.222363	0.212198	0.184244	0.005076	0.21066	0.430203	0.663706	0.994924	0.002538	0.248731	0.590102	0.760152	0.998731	0.001269	0.30203	0.497462	0.800761	1	0.534264	0.025381	0.440355	0.012706	0.071156	0.005083	0.001269	0.190355	0.527919	0.69797	1	0.008883	0.040609	0.130711	0.142132	0.988579	0.034264	0.335025	0.497462	0.854061	0.994924	0.461929	0.376112	0.006345	0.313452	0.545685	0.734772	0.997462	0.42132
0.330275	0.311927	0.357798	0.203704	0.231481	0.240741	0.045872	0.330275	0.623853	0.770642	1	0.018349	0.192661	0.40367	0.587156	0.972477	0.009174	0.238532	0.440367	0.779817	0.954128	0.376147	0.256881	0.366972	0.083333	0.083333	0.027778	0.009174	0.311927	0.495413	0.87156	1	0.036697	0.091743	0.449541	0.568807	0.844037	0.146789	0.229358	0.642202	0.761468	0.954128	0.458716	0.425926	0.036697	0.211009	0.477064	0.688073	0.954128	0.321101
0.284333	0.31528	0.400387	0.164729	0.218992	0.255814	0.007737	0.400387	0.617021	0.810445	0.998066	0.003868	0.199226	0.468085	0.736944	1	0.001934	0.230174	0.425532	0.702128	0.992263	0.357834	0.098646	0.54352	0.03876	0.089147	0.01938	0.001934	0.413926	0.626692	0.816248	1	0.040619	0.535783	0.62089	0.793037	0.901354	0.005803	0.185687	0.363636	0.636364	0.969052	0.636364	0.375969	0.003868	0.234043	0.468085	0.72147	0.992263	0.255319
0.377358	0.36478	0.257862	0.240506	0.183544	0.202532	0.012579	0.257862	0.603774	0.811321	1	0.037736	0.27044	0.433962	0.704403	0.987421	0.006289	0.188679	0.402516	0.616352	0.968553	0.36478	0.201258	0.433962	0.06962	0.094937	0.018987	0.006289	0.27044	0.603774	0.893082	1	0.025157	0.226415	0.314465	0.402516	0.981132	0.100629	0.201258	0.540881	0.72327	0.874214	0.371069	0.341772	0.025157	0.163522	0.377358	0.522013	0.930818	0.377358
0.405694	0.362989	0.231317	0.3	0.142857	0.192857	0.02847	0.217082	0.455516	0.686833	0.989324	0.010676	0.24911	0.494662	0.754448	0.978648	0.003559	0.256228	0.604982	0.800712	1	0.587189	0.124555	0.288256	0.057143	0.078571	0	0.003559	0.30605	0.47331	0.711744	1	0.007117	0.601423	0.697509	0.814947	0.978648	0.042705	0.11032	0.252669	0.654804	0.918149	0.320285	0.328571	0.007117	0.256228	0.654804	0.818505	0.992883	0.359431
0.333333	0.343434	0.323232	0.265306	0.193878	0.204082	0.070707	0.323232	0.565657	0.727273	1	0.020202	0.181818	0.444444	0.737374	0.979798	0.010101	0.232323	0.474747	0.686869	0.969697	0.373737	0.222222	0.40404	0.122449	0.061224	0	0.010101	0.212121	0.535354	0.888889	1	0.191919	0.474747	0.747475	0.79798	0.949495	0.060606	0.151515	0.40404	0.616162	0.717172	0.444444	0.44898	0.040404	0.262626	0.494949	0.757576	0.969697	0.292929
0.339515	0.378031	0.282454	0.25	0.207143	0.202857	0.012839	0.286733	0.510699	0.758916	0.99572	0.002853	0.18117	0.456491	0.724679	1	0.001427	0.300999	0.504993	0.74465	0.998573	0.60485	0.151213	0.243937	0.072857	0.064286	0.001429	0.001427	0.172611	0.413695	0.723252	1	0.108417	0.368046	0.550642	0.850214	0.950071	0.192582	0.356633	0.523538	0.78602	0.998573	0.467903	0.411429	0.008559	0.299572	0.526391	0.764622	0.994294	0.398003
0.407407	0.414141	0.178451	0.300676	0.148649	0.158784	0.006734	0.265993	0.555556	0.750842	1	0.010101	0.222222	0.521886	0.777778	0.986532	0.003367	0.191919	0.40404	0.535354	0.979798	0.690236	0.154882	0.154882	0.067568	0.047297	0	0.003367	0.26936	0.646465	0.818182	1	0.094276	0.272727	0.434343	0.491582	0.639731	0.03367	0.208754	0.383838	0.511785	0.905724	0.319865	0.324324	0.013468	0.222222	0.464646	0.649832	0.956229	0.417508
0.282369	0.370523	0.347107	0.209655	0.201379	0.262069	0.008264	0.279614	0.506887	0.772727	0.998623	0.002755	0.230028	0.487603	0.758953	0.997245	0.001377	0.23416	0.49449	0.719008	1	0.374656	0.11708	0.508264	0.046897	0.093793	0.002759	0.001377	0.260331	0.545455	0.790634	1	0.006887	0.085399	0.252066	0.581267	0.805785	0.0427	0.287879	0.493113	0.754821	0.993113	0.57438	0.342069	0.009642	0.230028	0.509642	0.736915	0.980716	0.402204
0.304348	0.481884	0.213768	0.341818	0.123636	0.192727	0.01087	0.231884	0.492754	0.807971	0.978261	0.007246	0.26087	0.543478	0.789855	1	0.003623	0.23913	0.405797	0.586957	0.869565	0.344203	0.083333	0.572464	0.043636	0.101818	0	0.003623	0.166667	0.442029	0.793478	1	0.413043	0.706522	0.75	0.778986	0.98913	0.050725	0.26087	0.467391	0.637681	0.931159	0.445652	0.334545	0.050725	0.23913	0.416667	0.630435	0.981884	0.48913
0.346667	0.324848	0.328485	0.234223	0.230583	0.200243	0.002424	0.281212	0.547879	0.764848	1	0.008485	0.259394	0.511515	0.818182	0.997576	0.001212	0.214545	0.430303	0.665455	0.950303	0.408485	0.191515	0.4	0.076456	0.071602	0.015777	0.001212	0.237576	0.527273	0.833939	1	0.006061	0.289697	0.541818	0.749091	0.973333	0.014545	0.252121	0.46303	0.699394	0.945455	0.524848	0.424757	0.004848	0.219394	0.442424	0.733333	0.993939	0.315152
0.405063	0.348101	0.246835	0.282092	0.196513	0.169572	0.003165	0.261076	0.52057	0.787975	0.995253	0.015823	0.280063	0.572785	0.781646	1	0.001582	0.199367	0.39557	0.620253	0.998418	0.530063	0.183544	0.286392	0.07607	0.050713	0.006339	0.001582	0.273734	0.617089	0.848101	1	0.007911	0.129747	0.27057	0.504747	0.993671	0.123418	0.299051	0.427215	0.661392	0.898734	0.463608	0.399366	0.006329	0.223101	0.43038	0.670886	0.993671	0.375
0.439535	0.32093	0.239535	0.261072	0.188811	0.181818	0.009302	0.25814	0.462791	0.748837	1	0.004651	0.181395	0.495349	0.723256	0.983721	0.002326	0.313953	0.54186	0.751163	0.953488	0.595349	0.15814	0.246512	0.072261	0.095571	0.002331	0.002326	0.197674	0.446512	0.755814	1	0.07907	0.506977	0.632558	0.772093	0.951163	0.016279	0.267442	0.372093	0.704651	0.990698	0.323256	0.344988	0.05814	0.27907	0.532558	0.723256	0.97907	0.330233
0.368421	0.355263	0.276316	0.306667	0.213333	0.146667	0.026316	0.210526	0.486842	0.763158	1	0.052632	0.328947	0.539474	0.776316	0.947368	0.013158	0.144737	0.315789	0.592105	0.921053	0.447368	0.552632	0	0.186667	0	0	0.013158	0.105263	0.394737	0.657895	1	0.118421	0.289474	0.565789	0.75	0.947368	0	0	0	0	0	0.539474	0.426667	0.092105	0.276316	0.5	0.697368	0.921053	0.368421
0.376623	0.285714	0.337662	0.200521	0.265625	0.195312	0.005195	0.184416	0.418182	0.724675	1	0.023377	0.335065	0.522078	0.742857	0.98961	0.002597	0.212987	0.501299	0.753247	0.997403	0.371429	0.228571	0.4	0.088542	0.072917	0	0.002597	0.288312	0.480519	0.792208	1	0.01039	0.187013	0.387013	0.607792	0.994805	0.051948	0.238961	0.581818	0.768831	0.979221	0.602597	0.411458	0.01039	0.301299	0.509091	0.742857	0.997403	0.322078
0.310959	0.394521	0.294521	0.163237	0.234568	0.266118	0.008219	0.19589	0.471233	0.753425	0.99863	0.00274	0.243836	0.49863	0.736986	1	0.00137	0.289041	0.515068	0.754795	0.994521	0.656164	0.1	0.243836	0.043896	0.082305	0	0.00137	0.242466	0.478082	0.689041	1	0.09863	0.161644	0.324658	0.9	0.994521	0.061644	0.347945	0.663014	0.794521	0.975342	0.673973	0.208505	0.015068	0.410959	0.583562	0.757534	0.991781	0.415068
0.407895	0.388158	0.203947	0.337748	0.15894	0.165563	0.013158	0.210526	0.460526	0.657895	1	0.026316	0.263158	0.539474	0.789474	0.967105	0.006579	0.164474	0.447368	0.730263	0.947368	0.467105	0.052632	0.480263	0.02649	0.10596	0	0.006579	0.256579	0.467105	0.651316	1	0.197368	0.203947	0.217105	0.486842	0.5	0.032895	0.184211	0.565789	0.855263	0.980263	0.388158	0.357616	0.052632	0.289474	0.605263	0.835526	0.940789	0.388158
0.279441	0.382236	0.338323	0.212787	0.202797	0.261738	0.00499	0.213573	0.44012	0.725549	0.99501	0.001996	0.280439	0.520958	0.766467	1	0.000998	0.238523	0.506986	0.737525	0.992016	0.468064	0.259481	0.272455	0.094905	0.050949	0.004995	0.000998	0.316367	0.528942	0.785429	1	0.003992	0.391218	0.615768	0.842315	0.97505	0.007984	0.091816	0.224551	0.570858	0.868263	0.632735	0.351648	0.003992	0.272455	0.541916	0.773453	0.992016	0.399202
0.290909	0.384848	0.324242	0.203647	0.221884	0.221884	0.009091	0.242424	0.445455	0.736364	0.981818	0.012121	0.272727	0.478788	0.748485	0.99697	0.00303	0.221212	0.551515	0.760606	1	0.369697	0.160606	0.469697	0.045593	0.100304	0.00304	0.00303	0.215152	0.50303	0.745455	1	0.154545	0.284848	0.521212	0.70303	0.784848	0.015152	0.245455	0.487879	0.833333	0.990909	0.518182	0.401216	0.021212	0.236364	0.527273	0.69697	0.984848	0.381818
0.27652	0.414779	0.308701	0.239857	0.168258	0.272076	0.002384	0.278903	0.533969	0.780691	0.998808	0.004768	0.24553	0.481526	0.72944	1	0.001192	0.22646	0.489869	0.741359	0.997616	0.487485	0.216925	0.29559	0.100239	0.057279	0.002387	0.001192	0.196663	0.464839	0.736591	1	0.039333	0.218117	0.406436	0.806913	0.997616	0.005959	0.333731	0.575685	0.756853	0.991657	0.561383	0.400955	0.003576	0.25149	0.475566	0.738975	0.997616	0.462455
0.52809	0.191011	0.280899	0.159091	0.284091	0.159091	0.033708	0.247191	0.516854	0.764045	1	0.022472	0.168539	0.337079	0.573034	0.876404	0.011236	0.325843	0.494382	0.752809	0.977528	0.247191	0	0.752809	0	0.090909	0	0.011236	0.191011	0.258427	0.550562	1	0	0	0	0	0	0.05618	0.314607	0.505618	0.752809	0.955056	0.393258	0.431818	0.089888	0.314607	0.483146	0.707865	0.977528	0.157303
0.349495	0.278788	0.371717	0.15587	0.299595	0.228745	0.010101	0.248485	0.50101	0.727273	1	0.00404	0.286869	0.507071	0.737374	0.989899	0.00202	0.218182	0.472727	0.761616	0.983838	0.375758	0.131313	0.492929	0.05668	0.076923	0.016194	0.00202	0.171717	0.482828	0.729293	1	0.084848	0.319192	0.571717	0.670707	0.937374	0.008081	0.244444	0.474747	0.761616	0.975758	0.547475	0.437247	0.008081	0.270707	0.50101	0.739394	0.985859	0.292929
0.3	0.413333	0.286667	0.22964	0.192256	0.221629	0.005333	0.250667	0.510667	0.78	0.998667	0.006667	0.228	0.530667	0.721333	0.997333	0.001333	0.265333	0.445333	0.753333	1	0.632	0.184	0.184	0.093458	0.058745	0.00534	0.001333	0.221333	0.528	0.730667	1	0.004	0.297333	0.446667	0.797333	0.985333	0.033333	0.286667	0.458667	0.816	0.981333	0.550667	0.368491	0.012	0.313333	0.550667	0.748	0.996	0.442667
0.275641	0.474359	0.25	0.283871	0.141935	0.2	0.025641	0.166667	0.50641	0.75641	0.99359	0.019231	0.282051	0.532051	0.807692	1	0.00641	0.198718	0.435897	0.602564	0.846154	0.583333	0.108974	0.307692	0.032258	0.045161	0.006452	0.00641	0.230769	0.378205	0.852564	1	0.185897	0.205128	0.423077	0.448718	0.685897	0.076923	0.480769	0.557692	0.75641	0.833333	0.423077	0.322581	0.051282	0.365385	0.5	0.660256	0.903846	0.467949
0.326531	0.397959	0.27551	0.216495	0.103093	0.298969	0.030612	0.214286	0.367347	0.887755	1	0.020408	0.377551	0.55102	0.765306	0.979592	0.010204	0.153061	0.408163	0.612245	0.826531	0.591837	0.214286	0.193878	0.103093	0.061856	0	0.010204	0.27551	0.683673	0.846939	1	0.306122	0.346939	0.510204	0.591837	0.816327	0.122449	0.153061	0.204082	0.428571	0.673469	0.510204	0.247423	0.05102	0.326531	0.469388	0.673469	0.816327	0.326531
0.36014	0.265734	0.374126	0.196491	0.259649	0.192982	0.006993	0.251748	0.48951	0.77972	0.993007	0.041958	0.248252	0.51049	0.716783	1	0.003497	0.237762	0.486014	0.751748	0.996503	0.405594	0.171329	0.423077	0.049123	0.077193	0	0.003497	0.178322	0.440559	0.695804	1	0.185315	0.34965	0.43007	0.632867	0.723776	0.034965	0.244755	0.527972	0.828671	0.986014	0.555944	0.414035	0.024476	0.244755	0.468531	0.674825	0.982517	0.265734
0.347826	0.336957	0.315217	0.230769	0.208791	0.197802	0.054348	0.195652	0.423913	0.836957	0.978261	0.021739	0.391304	0.630435	0.76087	1	0.01087	0.184783	0.347826	0.608696	0.804348	0.467391	0.358696	0.173913	0.10989	0.043956	0.021978	0.01087	0.315217	0.73913	0.880435	1	0.25	0.369565	0.48913	0.597826	0.782609	0.032609	0.108696	0.152174	0.195652	0.663043	0.456522	0.285714	0.097826	0.293478	0.456522	0.630435	0.793478	0.293478
0.366038	0.320755	0.313208	0.265152	0.208333	0.204545	0.007547	0.264151	0.539623	0.754717	1	0.011321	0.203774	0.430189	0.701887	0.984906	0.003774	0.260377	0.471698	0.732075	0.981132	0.388679	0.090566	0.520755	0.034091	0.102273	0.003788	0.003774	0.09434	0.34717	0.74717	1	0.211321	0.777358	0.826415	0.849057	0.879245	0.109434	0.309434	0.49434	0.645283	0.988679	0.498113	0.363636	0.022642	0.279245	0.471698	0.698113	0.981132	0.335849
0.39011	0.274725	0.335165	0.206612	0.267218	0.217631	0.005495	0.282967	0.519231	0.774725	0.997253	0.019231	0.241758	0.497253	0.695055	0.991758	0.002747	0.21978	0.478022	0.728022	1	0.543956	0.178571	0.277473	0.063361	0.052342	0.008264	0.002747	0.277473	0.480769	0.741758	1	0.076923	0.14011	0.667582	0.799451	0.994505	0.038462	0.228022	0.392857	0.722527	0.912088	0.453297	0.380165	0.016484	0.239011	0.510989	0.730769	0.986264	0.326923
0.316838	0.328522	0.354639	0.198074	0.229711	0.243466	0.004124	0.28866	0.514089	0.752577	0.996564	0.002062	0.241924	0.498282	0.743643	0.998625	0.000687	0.235739	0.487285	0.749828	1	0.54433	0.360137	0.095533	0.114168	0.037139	0.008253	0.000687	0.261856	0.498282	0.717526	1	0.002062	0.201375	0.457045	0.754639	0.936082	0.04055	0.335395	0.626117	0.958076	0.998625	0.591753	0.316369	0.001375	0.243299	0.490722	0.753952	0.997938	0.34433
0.290123	0.391975	0.317901	0.232198	0.167183	0.26935	0.018519	0.283951	0.496914	0.768519	1	0.006173	0.219136	0.521605	0.697531	0.996914	0.003086	0.246914	0.45679	0.771605	0.993827	0.623457	0.296296	0.080247	0.092879	0.037152	0	0.003086	0.225309	0.549383	0.740741	1	0.111111	0.299383	0.481481	0.756173	0.919753	0.018519	0.033951	0.058642	0.447531	0.966049	0.604938	0.28483	0.012346	0.194444	0.475309	0.712963	0.993827	0.429012
0.376045	0.328691	0.295265	0.27095	0.187151	0.192737	0.008357	0.275766	0.451253	0.771588	0.997214	0.005571	0.253482	0.551532	0.752089	0.988858	0.002786	0.200557	0.512535	0.682451	1	0.523677	0.178273	0.29805	0.053073	0.075419	0.00838	0.002786	0.337047	0.512535	0.793872	1	0.052925	0.116992	0.654596	0.777159	0.86351	0.019499	0.222841	0.328691	0.626741	0.980501	0.389972	0.357542	0.013928	0.200557	0.392758	0.668524	0.994429	0.37883
0.445783	0.337349	0.216867	0.353659	0.219512	0.134146	0.036145	0.240964	0.481928	0.698795	1	0.024096	0.228916	0.457831	0.759036	0.987952	0.012048	0.13253	0.590361	0.686747	0.951807	0.240964	0	0.759036	0	0.097561	0	0.012048	0.493976	0.759036	0.819277	1	0	0	0	0	0	0.048193	0.216867	0.421687	0.674699	0.975904	0.325301	0.463415	0.048193	0.253012	0.457831	0.650602	0.939759	0.361446
0.282051	0.389744	0.328205	0.21134	0.201031	0.257732	0.030769	0.307692	0.558974	0.764103	0.994872	0.010256	0.179487	0.425641	0.717949	1	0.005128	0.271795	0.476923	0.774359	0.989744	0.507692	0.4	0.092308	0.139175	0.036082	0.005155	0.005128	0.230769	0.482051	0.717949	1	0.035897	0.210256	0.425641	0.733333	0.933333	0.538462	0.589744	0.615385	0.953846	0.984615	0.512821	0.350515	0.025641	0.25641	0.45641	0.728205	0.989744	0.394872
0.333333	0.387387	0.279279	0.318182	0.154545	0.2	0.018018	0.189189	0.468468	0.711712	0.954955	0.036036	0.243243	0.459459	0.747748	1	0.009009	0.207207	0.495495	0.702703	0.990991	0.468468	0.315315	0.216216	0.109091	0.036364	0.018182	0.009009	0.27027	0.432432	0.81982	1	0.063063	0.387387	0.666667	0.783784	0.936937	0.054054	0.171171	0.468468	0.522523	0.576577	0.342342	0.363636	0.036036	0.135135	0.45045	0.666667	0.936937	0.396396
0.3	0.429412	0.270588	0.260355	0.16568	0.224852	0.088235	0.323529	0.488235	0.735294	0.994118	0.011765	0.217647	0.511765	0.752941	0.982353	0.005882	0.176471	0.464706	0.723529	1	0.405882	0.235294	0.358824	0.076923	0.076923	0.005917	0.005882	0.188235	0.423529	0.694118	1	0.058824	0.176471	0.470588	0.570588	0.858824	0.1	0.352941	0.652941	0.782353	0.970588	0.535294	0.284024	0.023529	0.164706	0.470588	0.729412	0.988235	0.417647
0.381089	0.372493	0.246418	0.247126	0.16092	0.201149	0.008596	0.234957	0.444126	0.716332	0.991404	0.005731	0.157593	0.446991	0.724928	0.997135	0.002865	0.378223	0.567335	0.782235	1	0.481375	0.22063	0.297994	0.063218	0.057471	0.005747	0.002865	0.140401	0.432665	0.719198	1	0.409742	0.60745	0.802292	0.876791	0.994269	0.071633	0.206304	0.312321	0.495702	0.762178	0.424069	0.287356	0.04298	0.446991	0.627507	0.805158	0.994269	0.366762
0.333333	0.466361	0.200306	0.279959	0.141254	0.193269	0.001019	0.205912	0.453109	0.700306	0.998981	0.003058	0.258919	0.492864	0.770642	0.99949	0.00051	0.286952	0.587156	0.787971	1	0.842508	0.043323	0.114169	0.028047	0.033146	0.00051	0.00051	0.253313	0.477064	0.754842	1	0.044343	0.166157	0.286952	0.546891	0.941896	0.001529	0.506626	0.712538	0.746177	0.992355	0.480632	0.321265	0.002039	0.268094	0.533639	0.817533	0.998471	0.488787
0.309278	0.340206	0.350515	0.213793	0.234483	0.237931	0.027491	0.24055	0.491409	0.718213	0.982818	0.006873	0.230241	0.450172	0.762887	1	0.003436	0.278351	0.512027	0.742268	0.996564	0.460481	0.257732	0.281787	0.089655	0.048276	0	0.003436	0.24055	0.436426	0.67354	1	0.116838	0.213058	0.474227	0.697595	0.828179	0.013746	0.360825	0.542955	0.890034	0.962199	0.536082	0.351724	0.017182	0.292096	0.505155	0.725086	0.996564	0.395189
0.370968	0.298387	0.330645	0.268293	0.235772	0.203252	0.040323	0.209677	0.483871	0.669355	0.975806	0.016129	0.217742	0.435484	0.741935	0.983871	0.008065	0.258065	0.564516	0.717742	1	0.435484	0.153226	0.41129	0.04878	0.081301	0	0.008065	0.209677	0.629032	0.774194	1	0.233871	0.258065	0.362903	0.403226	0.709677	0.040323	0.153226	0.524194	0.782258	0.887097	0.435484	0.308943	0.024194	0.354839	0.516129	0.693548	0.919355	0.266129
0.355372	0.289256	0.355372	0.207469	0.248963	0.224066	0.012397	0.239669	0.495868	0.694215	0.987603	0.008264	0.177686	0.429752	0.760331	0.995868	0.004132	0.285124	0.524793	0.747934	1	0.475207	0.371901	0.152893	0.141079	0.033195	0	0.004132	0.152893	0.5	0.768595	1	0.107438	0.446281	0.607438	0.805785	0.979339	0.024793	0.161157	0.198347	0.243802	0.487603	0.516529	0.381743	0.016529	0.268595	0.508264	0.747934	0.983471	0.280992
0.450867	0.236994	0.312139	0.209302	0.290698	0.174419	0.011561	0.277457	0.485549	0.83237	0.99422	0.075145	0.225434	0.531792	0.728324	0.988439	0.00578	0.202312	0.456647	0.65896	1	0.364162	0.283237	0.352601	0.122093	0.063953	0.005814	0.00578	0.138728	0.508671	0.722543	1	0.011561	0.213873	0.531792	0.751445	0.843931	0.052023	0.289017	0.375723	0.589595	0.976879	0.352601	0.44186	0.017341	0.179191	0.456647	0.65896	0.930636	0.265896
0.451282	0.317949	0.230769	0.319588	0.170103	0.154639	0.010256	0.312821	0.6	0.789744	1	0.015385	0.271795	0.502564	0.758974	0.989744	0.005128	0.184615	0.34359	0.512821	0.979487	0.74359	0.158974	0.097436	0.072165	0.051546	0.010309	0.005128	0.297436	0.6	0.805128	1	0.148718	0.220513	0.353846	0.420513	0.851282	0.05641	0.071795	0.138462	0.569231	0.641026	0.34359	0.268041	0.020513	0.169231	0.312821	0.507692	0.897436	0.374359
0.359459	0.348649	0.291892	0.265583	0.216802	0.197832	0.005405	0.22973	0.464865	0.762162	0.997297	0.010811	0.218919	0.481081	0.710811	1	0.002703	0.3	0.543243	0.735135	0.994595	0.483784	0.156757	0.359459	0.056911	0.067751	0.00813	0.002703	0.227027	0.540541	0.775676	1	0.235135	0.386486	0.543243	0.683784	0.994595	0.091892	0.2	0.427027	0.751351	0.918919	0.502703	0.325203	0.054054	0.291892	0.5	0.713514	0.994595	0.383784
0.321244	0.378238	0.300518	0.239583	0.255208	0.229167	0.015544	0.238342	0.476684	0.725389	1	0.010363	0.207254	0.497409	0.740933	0.979275	0.005181	0.279793	0.528497	0.73057	0.989637	0.419689	0.466321	0.11399	0.140625	0.026042	0.005208	0.005181	0.300518	0.590674	0.834197	1	0.015544	0.326425	0.523316	0.694301	0.979275	0.07772	0.098446	0.238342	0.264249	0.725389	0.46114	0.489583	0.015544	0.264249	0.476684	0.704663	0.974093	0.419689
0.308355	0.391247	0.300398	0.248839	0.162575	0.246184	0.001989	0.28382	0.540451	0.780504	0.997347	0.001326	0.246684	0.465517	0.731432	0.998011	0.000663	0.232759	0.468833	0.736074	1	0.417109	0.288462	0.29443	0.105508	0.040478	0.001991	0.000663	0.210212	0.431034	0.756631	1	0.009947	0.145889	0.284483	0.418435	0.8687	0.554377	0.653183	0.737401	0.850796	0.998011	0.555703	0.353019	0.003316	0.232759	0.458886	0.695623	0.999337	0.403846
0.358491	0.320755	0.320755	0.115385	0.288462	0.230769	0.056604	0.150943	0.54717	0.773585	1	0.037736	0.207547	0.396226	0.490566	0.90566	0.018868	0.320755	0.528302	0.735849	0.981132	0.566038	0.075472	0.358491	0.076923	0.076923	0	0.018868	0.132075	0.283019	0.471698	1	0.320755	0.320755	0.339623	0.358491	0.962264	0.490566	0.54717	0.679245	0.773585	0.867925	0.320755	0.346154	0.320755	0.509434	0.622642	0.735849	0.924528	0.320755
0.441441	0.297297	0.261261	0.290909	0.163636	0.127273	0.018018	0.288288	0.486486	0.747748	0.981982	0.063063	0.261261	0.495495	0.675676	0.990991	0.009009	0.207207	0.351351	0.684685	1	0.45045	0.54955	0	0.181818	0	0	0.009009	0.18018	0.477477	0.711712	1	0.036036	0.243243	0.567568	0.792793	0.990991	0	0	0	0	0	0.441441	0.290909	0.036036	0.243243	0.54955	0.675676	0.936937	0.315315
0.38833	0.327968	0.283702	0.274194	0.191532	0.197581	0.006036	0.217304	0.440644	0.696177	1	0.004024	0.245473	0.515091	0.746479	0.993964	0.002012	0.31992	0.561368	0.790744	0.991952	0.468813	0.092555	0.438632	0.042339	0.094758	0.006048	0.002012	0.158954	0.368209	0.661972	1	0.070423	0.593561	0.762575	0.889336	0.969819	0.004024	0.32998	0.535211	0.750503	0.991952	0.38833	0.342742	0.016097	0.484909	0.657948	0.841046	0.991952	0.358149
0.3475	0.305	0.3475	0.20802	0.245614	0.213033	0.01	0.2775	0.505	0.7875	1	0.0075	0.19	0.43	0.705	0.9975	0.0025	0.2625	0.5225	0.7625	0.985	0.345	0.0925	0.5625	0.0401	0.120301	0.005013	0.0025	0.225	0.425	0.735	1	0.055	0.115	0.1975	0.29	0.36	0.01	0.4	0.5875	0.775	0.985	0.545	0.41604	0.015	0.27	0.4625	0.6975	0.98	0.31
0.347426	0.290441	0.362132	0.174954	0.281768	0.198895	0.003676	0.28125	0.522059	0.775735	0.998162	0.007353	0.202206	0.465074	0.691176	1	0.001838	0.259191	0.514706	0.731618	0.992647	0.216912	0.022059	0.761029	0.005525	0.104972	0.001842	0.001838	0.222426	0.492647	0.737132	1	0.011029	0.014706	0.886029	0.891544	0.897059	0.020221	0.251838	0.503676	0.738971	0.992647	0.529412	0.441989	0.007353	0.262868	0.549632	0.751838	0.992647	0.268382
0.328571	0.378571	0.292857	0.302158	0.194245	0.230216	0.021429	0.171429	0.478571	0.792857	1	0.028571	0.214286	0.435714	0.678571	0.992857	0.007143	0.3	0.514286	0.735714	0.978571	0.514286	0.235714	0.25	0.100719	0.043165	0	0.007143	0.15	0.5	0.642857	1	0.057143	0.457143	0.664286	0.742857	0.957143	0.221429	0.321429	0.385714	0.814286	0.878571	0.478571	0.374101	0.064286	0.314286	0.485714	0.728571	0.942857	0.342857
0.391685	0.40919	0.199125	0.313596	0.16886	0.125	0.010941	0.260394	0.424508	0.63895	0.997812	0.004376	0.33698	0.634573	0.798687	0.978118	0.002188	0.137856	0.310722	0.682713	1	0.689278	0.113786	0.196937	0.054825	0.050439	0.002193	0.002188	0.330416	0.59081	0.785558	1	0.159737	0.310722	0.654267	0.816193	0.989059	0.026258	0.080963	0.21663	0.391685	0.608315	0.396061	0.350877	0.008753	0.183807	0.63895	0.761488	0.989059	0.396061
0.265659	0.462203	0.272138	0.207792	0.160173	0.233766	0.030238	0.278618	0.475162	0.639309	0.993521	0.00432	0.209503	0.50108	0.796976	0.99784	0.00216	0.304536	0.509719	0.742981	1	0.730022	0.079914	0.190065	0.034632	0.04329	0.004329	0.00216	0.205184	0.490281	0.794816	1	0.023758	0.159827	0.451404	0.529158	0.833693	0.220302	0.37149	0.557235	0.650108	0.948164	0.468683	0.341991	0.008639	0.263499	0.531317	0.799136	0.963283	0.475162
0.2625	0.483333	0.254167	0.205021	0.175732	0.230126	0.025	0.195833	0.3625	0.641667	1	0.008333	0.320833	0.616667	0.85	0.9875	0.004167	0.25	0.404167	0.608333	0.7875	0.375	0.333333	0.291667	0.112971	0.054393	0.004184	0.004167	0.2375	0.508333	0.691667	1	0.016667	0.2625	0.391667	0.55	0.766667	0.075	0.229167	0.825	0.895833	0.9875	0.416667	0.468619	0.020833	0.258333	0.445833	0.6625	0.970833	0.5125
0.302752	0.426606	0.270642	0.225806	0.179724	0.207373	0.009174	0.169725	0.449541	0.747706	0.958716	0.018349	0.238532	0.444954	0.711009	0.995413	0.004587	0.334862	0.56422	0.793578	1	0.582569	0.256881	0.16055	0.078341	0.032258	0.004608	0.004587	0.233945	0.440367	0.738532	1	0.266055	0.472477	0.573394	0.83945	0.940367	0.12844	0.16055	0.201835	0.637615	0.889908	0.46789	0.35023	0.142202	0.330275	0.573394	0.770642	0.990826	0.444954
0.370192	0.360577	0.269231	0.304348	0.21256	0.198068	0.014423	0.225962	0.418269	0.706731	1	0.009615	0.173077	0.475962	0.730769	0.995192	0.004808	0.427885	0.586538	0.798077	0.985577	0.456731	0.168269	0.375	0.072464	0.082126	0.024155	0.004808	0.153846	0.514423	0.706731	1	0.096154	0.293269	0.615385	0.947115	0.990385	0.043269	0.326923	0.4375	0.730769	0.923077	0.480769	0.415459	0.019231	0.346154	0.509615	0.735577	0.985577	0.346154
0.300752	0.330827	0.368421	0.212121	0.181818	0.242424	0.045113	0.263158	0.443609	0.646617	0.954887	0.015038	0.225564	0.578947	0.774436	0.947368	0.007519	0.24812	0.458647	0.744361	1	0.353383	0.360902	0.285714	0.174242	0.05303	0.007576	0.007519	0.330827	0.56391	0.729323	1	0.18797	0.398496	0.541353	0.81203	0.992481	0.037594	0.097744	0.255639	0.323308	0.917293	0.466165	0.424242	0.030075	0.233083	0.556391	0.789474	0.992481	0.293233
0.418803	0.282051	0.299145	0.224138	0.241379	0.163793	0.017094	0.282051	0.564103	0.786325	0.991453	0.034188	0.230769	0.478632	0.769231	1	0.008547	0.162393	0.384615	0.641026	0.974359	0.367521	0.239316	0.393162	0.077586	0.094828	0.025862	0.008547	0.290598	0.470085	0.82906	1	0.034188	0.08547	0.418803	0.529915	0.786325	0.136752	0.222222	0.623932	0.74359	0.974359	0.42735	0.396552	0.034188	0.196581	0.444444	0.641026	0.888889	0.290598
0.366935	0.322581	0.310484	0.271255	0.218623	0.190283	0.008065	0.221774	0.491935	0.741935	1	0.032258	0.254032	0.532258	0.822581	0.987903	0.004032	0.245968	0.439516	0.657258	0.991935	0.330645	0.084677	0.584677	0.032389	0.11336	0	0.004032	0.169355	0.447581	0.778226	1	0.439516	0.766129	0.826613	0.846774	0.879032	0.040323	0.258065	0.459677	0.620968	0.983871	0.495968	0.364372	0.016129	0.245968	0.447581	0.685484	0.987903	0.278226
0.339623	0.372642	0.287736	0.251185	0.241706	0.189573	0.009434	0.212264	0.448113	0.764151	0.990566	0.04717	0.330189	0.504717	0.712264	1	0.004717	0.174528	0.518868	0.75	0.971698	0.537736	0.141509	0.320755	0.075829	0.066351	0	0.004717	0.264151	0.400943	0.688679	1	0.014151	0.066038	0.589623	0.731132	0.915094	0.09434	0.20283	0.556604	0.787736	0.976415	0.509434	0.369668	0.014151	0.34434	0.528302	0.768868	0.971698	0.40566
0.428571	0.404762	0.166667	0.361446	0.180723	0.120482	0.02381	0.345238	0.630952	0.845238	1	0.035714	0.22619	0.416667	0.642857	0.97619	0.011905	0.142857	0.333333	0.607143	0.797619	0.630952	0.261905	0.107143	0.120482	0.024096	0	0.011905	0.22619	0.511905	0.833333	1	0.130952	0.178571	0.297619	0.428571	0.619048	0.678571	0.690476	0.714286	0.738095	0.77381	0.333333	0.361446	0.059524	0.261905	0.452381	0.547619	0.77381	0.464286
0.374813	0.388306	0.236882	0.288288	0.160661	0.171171	0.002999	0.209895	0.469265	0.73913	1	0.011994	0.266867	0.518741	0.770615	0.995502	0.001499	0.311844	0.547226	0.731634	0.997001	0.544228	0.127436	0.328336	0.046547	0.073574	0.007508	0.001499	0.151424	0.389805	0.767616	1	0.227886	0.457271	0.572714	0.709145	0.826087	0.004498	0.362819	0.56072	0.737631	0.98051	0.481259	0.327327	0.004498	0.310345	0.491754	0.667166	0.986507	0.433283
0.327125	0.37369	0.299185	0.216783	0.216783	0.201632	0.003492	0.288708	0.537835	0.76135	0.995343	0.006985	0.19092	0.521537	0.777648	1	0.001164	0.285215	0.461001	0.648428	0.998836	0.59837	0.017462	0.384168	0.01049	0.064103	0.001166	0.001164	0.152503	0.580908	0.83702	1	0.250291	0.252619	0.431898	0.778813	0.9383	0.096624	0.351572	0.488941	0.610012	0.859139	0.57858	0.428904	0.002328	0.195576	0.434226	0.67404	0.998836	0.370198
0.342857	0.409524	0.247619	0.259615	0.163462	0.192308	0.019048	0.180952	0.409524	0.628571	0.990476	0.028571	0.228571	0.485714	0.761905	1	0.009524	0.285714	0.561905	0.771429	0.961905	0.485714	0.047619	0.466667	0.038462	0.115385	0	0.009524	0.2	0.4	0.847619	1	0.295238	0.295238	0.304762	0.942857	0.961905	0.038095	0.257143	0.542857	0.714286	0.838095	0.361905	0.307692	0.057143	0.371429	0.714286	0.8	0.961905	0.361905
0.385396	0.273834	0.340771	0.207317	0.26626	0.191057	0.008114	0.247465	0.488844	0.758621	1	0.004057	0.245436	0.541582	0.74645	0.991886	0.002028	0.237323	0.470588	0.724138	0.98783	0.25355	0.083164	0.663286	0.026423	0.067073	0.006098	0.002028	0.383367	0.647059	0.805274	1	0.320487	0.375254	0.444219	0.965517	0.98783	0.008114	0.180527	0.466531	0.669371	0.945233	0.51927	0.426829	0.010142	0.31643	0.541582	0.760649	0.98783	0.281947
0.383178	0.35514	0.261682	0.28169	0.234742	0.201878	0.014019	0.219626	0.528037	0.775701	0.995327	0.009346	0.285047	0.5	0.724299	1	0.004673	0.228972	0.481308	0.682243	0.990654	0.415888	0.116822	0.46729	0.056338	0.103286	0	0.004673	0.191589	0.476636	0.682243	1	0.158879	0.182243	0.228972	0.285047	0.607477	0.056075	0.392523	0.635514	0.803738	0.985981	0.565421	0.347418	0.018692	0.247664	0.429907	0.602804	0.915888	0.32243
0.246753	0.470779	0.282468	0.214984	0.162866	0.276873	0.00974	0.237013	0.535714	0.766234	0.996753	0.006494	0.25974	0.483766	0.720779	1	0.003247	0.230519	0.474026	0.743506	0.987013	0.512987	0.288961	0.198052	0.114007	0.04886	0.009772	0.003247	0.246753	0.49026	0.75974	1	0.00974	0.279221	0.558442	0.727273	0.941558	0.035714	0.107143	0.396104	0.532468	0.993506	0.522727	0.371336	0.019481	0.327922	0.522727	0.75974	0.987013	0.461039
0.305195	0.467532	0.227273	0.286645	0.143322	0.205212	0.012987	0.211039	0.415584	0.701299	0.987013	0.006494	0.318182	0.61039	0.827922	1	0.003247	0.214286	0.376623	0.623377	0.957792	0.62013	0.090909	0.288961	0.035831	0.055375	0.009772	0.003247	0.285714	0.652597	0.844156	1	0.233766	0.253247	0.363636	0.477273	0.801948	0.029221	0.12013	0.415584	0.558442	0.75974	0.503247	0.345277	0.035714	0.301948	0.548701	0.821429	0.993506	0.477273
0.278351	0.378007	0.343643	0.224138	0.182759	0.244828	0.006873	0.250859	0.487973	0.766323	0.993127	0.017182	0.223368	0.477663	0.731959	0.996564	0.003436	0.257732	0.525773	0.745704	1	0.398625	0.168385	0.43299	0.048276	0.096552	0	0.003436	0.182131	0.429553	0.701031	1	0.202749	0.357388	0.443299	0.635739	0.725086	0.054983	0.257732	0.536082	0.821306	0.986254	0.532646	0.406897	0.041237	0.278351	0.484536	0.683849	0.982818	0.381443
0.309255	0.496614	0.194131	0.273756	0.147059	0.149321	0.004515	0.300226	0.469526	0.733634	0.997743	0.015801	0.185102	0.544018	0.790068	1	0.002257	0.291196	0.478555	0.604966	0.972912	0.724605	0.065463	0.209932	0.024887	0.052036	0.002262	0.002257	0.185102	0.532731	0.785553	1	0.34763	0.361174	0.397291	0.44921	0.896163	0.020316	0.275395	0.476298	0.593679	0.936795	0.458239	0.38009	0.024831	0.370203	0.602709	0.760722	0.993228	0.48307
0.414634	0.231707	0.353659	0.234568	0.345679	0.135802	0.02439	0.243902	0.414634	0.682927	1	0.04878	0.390244	0.585366	0.768293	0.878049	0.012195	0.182927	0.45122	0.695122	0.987805	0.341463	0.304878	0.353659	0.098765	0.049383	0	0.012195	0.243902	0.414634	0.634146	1	0.304878	0.365854	0.47561	0.621951	0.987805	0.085366	0.158537	0.682927	0.768293	0.865854	0.487805	0.469136	0.04878	0.182927	0.560976	0.743902	0.97561	0.280488
0.485265	0.310413	0.204322	0.281496	0.173228	0.151575	0.009823	0.174853	0.449902	0.75835	1	0.003929	0.330059	0.534381	0.781925	0.994106	0.001965	0.337917	0.485265	0.638507	0.950884	0.638507	0.119843	0.24165	0.05315	0.072835	0.001969	0.001965	0.267191	0.526523	0.774067	1	0.332024	0.428291	0.51277	0.626719	0.943026	0.019646	0.159136	0.373281	0.650295	0.935167	0.273084	0.287402	0.017682	0.385069	0.540275	0.666012	0.962672	0.375246
0.438776	0.255102	0.306122	0.268041	0.309278	0.123711	0.030612	0.193878	0.530612	0.714286	0.989796	0.081633	0.295918	0.428571	0.673469	0.979592	0.010204	0.22449	0.469388	0.755102	1	0.459184	0.408163	0.132653	0.092784	0.051546	0.010309	0.010204	0.193878	0.602041	0.714286	1	0.204082	0.336735	0.5	0.72449	0.908163	0.061224	0.081633	0.132653	0.918367	0.959184	0.336735	0.453608	0.040816	0.27551	0.44898	0.734694	0.969388	0.234694
0.386805	0.331177	0.282018	0.244819	0.224093	0.176166	0.002587	0.296248	0.56533	0.805951	0.996119	0.005175	0.163001	0.454075	0.717982	1	0.001294	0.27555	0.468305	0.676585	0.997413	0.457956	0.119017	0.423027	0.049223	0.082902	0.005181	0.001294	0.151358	0.508409	0.745149	1	0.086675	0.269082	0.39586	0.534282	0.956016	0.056921	0.30401	0.567917	0.807245	0.997413	0.438551	0.352332	0.010349	0.240621	0.428202	0.610608	0.997413	0.362225
0.41637	0.238434	0.345196	0.157143	0.307143	0.167857	0.032028	0.270463	0.505338	0.768683	0.989324	0.014235	0.231317	0.491103	0.718861	1	0.003559	0.234875	0.483986	0.711744	0.985765	0.3879	0.188612	0.423488	0.057143	0.078571	0	0.003559	0.19573	0.434164	0.704626	1	0.007117	0.295374	0.441281	0.644128	0.740214	0.053381	0.256228	0.537367	0.83274	0.992883	0.55516	0.414286	0.007117	0.245552	0.476868	0.66548	0.985765	0.224199
0.21097	0.565401	0.223629	0.207627	0.09322	0.224576	0.016878	0.248945	0.396624	0.565401	1	0.021097	0.274262	0.590717	0.780591	0.983122	0.004219	0.202532	0.438819	0.628692	0.995781	0.759494	0.135021	0.105485	0.067797	0.033898	0	0.004219	0.341772	0.607595	0.810127	1	0.139241	0.253165	0.312236	0.409283	0.561181	0.084388	0.198312	0.223629	0.362869	0.751055	0.544304	0.305085	0.008439	0.375527	0.64557	0.793249	0.978903	0.527426
0.313576	0.414914	0.271511	0.247126	0.166667	0.222222	0.007648	0.258126	0.48566	0.739962	0.99044	0.003824	0.225621	0.491396	0.764818	1	0.001912	0.263862	0.527725	0.726577	0.998088	0.669216	0.152964	0.17782	0.061303	0.05364	0	0.001912	0.246654	0.535373	0.808795	1	0.00956	0.208413	0.374761	0.608031	0.996176	0.128107	0.342256	0.483748	0.694073	0.982792	0.479924	0.321839	0.005736	0.3174	0.602294	0.814532	0.998088	0.409178
0.380952	0.35119	0.267857	0.298507	0.18806	0.173134	0.008929	0.232143	0.517857	0.800595	1	0.005952	0.270833	0.508929	0.75	0.994048	0.002976	0.238095	0.443452	0.642857	0.97619	0.443452	0.172619	0.383929	0.080597	0.074627	0.002985	0.002976	0.247024	0.544643	0.803571	1	0.074405	0.202381	0.494048	0.642857	0.931548	0.008929	0.264881	0.46131	0.71131	0.982143	0.369048	0.4	0.014881	0.247024	0.443452	0.645833	0.985119	0.369048
0.420213	0.324468	0.255319	0.28877	0.144385	0.203209	0.010638	0.239362	0.478723	0.680851	1	0.026596	0.223404	0.37766	0.75	0.984043	0.005319	0.319149	0.601064	0.787234	0.994681	0.617021	0.101064	0.281915	0.064171	0.064171	0	0.005319	0.164894	0.324468	0.632979	1	0.058511	0.590426	0.617021	0.680851	0.792553	0.388298	0.457447	0.734043	0.87766	0.989362	0.303191	0.352941	0.031915	0.404255	0.617021	0.81383	0.957447	0.31383
0.385841	0.320354	0.293805	0.241135	0.218085	0.205674	0.00531	0.221239	0.492035	0.785841	1	0.00354	0.256637	0.469027	0.727434	0.99646	0.00177	0.260177	0.515044	0.697345	0.99292	0.474336	0.118584	0.40708	0.058511	0.10461	0.005319	0.00177	0.315044	0.59115	0.842478	1	0.047788	0.189381	0.580531	0.697345	0.909735	0.00531	0.210619	0.39646	0.60531	0.980531	0.557522	0.35461	0.019469	0.256637	0.460177	0.637168	0.99292	0.341593
0.388704	0.303987	0.307309	0.219634	0.242928	0.1797	0.003322	0.275748	0.516611	0.795681	0.998339	0.004983	0.237542	0.503322	0.715947	0.993355	0.001661	0.217608	0.453488	0.717608	1	0.503322	0.181063	0.315615	0.071547	0.058236	0.001664	0.001661	0.260797	0.538206	0.770764	1	0.038206	0.164452	0.475083	0.60299	0.976744	0.066445	0.249169	0.430233	0.807309	0.975083	0.501661	0.339434	0.006645	0.222591	0.465116	0.709302	0.996678	0.322259
0.322422	0.407529	0.270049	0.257377	0.170492	0.221311	0.011457	0.314239	0.548282	0.765957	1	0.003273	0.170213	0.384615	0.710311	0.998363	0.001637	0.348609	0.563011	0.769231	0.99509	0.662848	0.10802	0.229133	0.054098	0.054098	0.001639	0.001637	0.165303	0.358429	0.728314	1	0.188216	0.320786	0.512275	0.695581	0.93617	0.369885	0.479542	0.636661	0.818331	0.99509	0.422259	0.383607	0.022913	0.292962	0.538462	0.752864	0.99509	0.428805
0.358779	0.305344	0.335878	0.223077	0.238462	0.246154	0.076336	0.335878	0.519084	0.778626	0.938931	0.022901	0.19084	0.412214	0.755725	1	0.007634	0.21374	0.442748	0.687023	0.992366	0.458015	0.137405	0.40458	0.046154	0.092308	0	0.007634	0.19084	0.351145	0.748092	1	0.259542	0.282443	0.381679	0.412214	0.694656	0.076336	0.465649	0.564885	0.78626	0.89313	0.419847	0.323077	0.053435	0.29771	0.503817	0.679389	0.954198	0.274809
0.475309	0.345679	0.179012	0.343653	0.126935	0.145511	0.009259	0.209877	0.435185	0.746914	0.966049	0.006173	0.314815	0.555556	0.771605	0.993827	0.003086	0.354938	0.478395	0.694444	1	0.506173	0.092593	0.401235	0.043344	0.080495	0.006192	0.003086	0.228395	0.41358	0.694444	1	0.012346	0.083333	0.395062	0.484568	0.932099	0.015432	0.367284	0.611111	0.762346	0.987654	0.287037	0.278638	0.012346	0.410494	0.574074	0.712963	0.987654	0.37963
0.372007	0.3407	0.287293	0.236866	0.213825	0.2	0.002762	0.210866	0.462247	0.744936	1	0.001842	0.237569	0.48895	0.731123	0.999079	0.000921	0.334254	0.550645	0.775322	0.994475	0.441989	0.093002	0.465009	0.042396	0.086636	0.001843	0.000921	0.190608	0.394107	0.672192	1	0.005525	0.289134	0.384899	0.569061	0.95488	0.004604	0.361878	0.609576	0.78453	0.996317	0.476059	0.337327	0.005525	0.330571	0.541436	0.757827	0.994475	0.344383
0.395904	0.331058	0.273038	0.270548	0.226027	0.167808	0.010239	0.228669	0.484642	0.764505	1	0.006826	0.204778	0.457338	0.59727	0.989761	0.003413	0.327645	0.641638	0.819113	0.996587	0.546075	0.201365	0.25256	0.085616	0.065068	0.003425	0.003413	0.255973	0.498294	0.641638	1	0.068259	0.191126	0.242321	0.720137	0.955631	0.013652	0.416382	0.682594	0.849829	0.993174	0.409556	0.349315	0.017065	0.423208	0.607509	0.8157	0.996587	0.34471
0.373606	0.405204	0.22119	0.255121	0.148976	0.188082	0.005576	0.369888	0.635688	0.834572	1	0.003717	0.224907	0.39777	0.654275	0.994424	0.001859	0.159851	0.468401	0.684015	0.996283	0.546468	0.013011	0.44052	0.009311	0.083799	0.001862	0.001859	0.245353	0.3829	0.669145	1	0.420074	0.420074	0.942379	0.990706	0.994424	0.01487	0.169145	0.615242	0.765799	0.94052	0.381041	0.357542	0.013011	0.19145	0.477695	0.674721	0.996283	0.442379
0.434211	0.236842	0.328947	0.198675	0.284768	0.198675	0.013158	0.269737	0.585526	0.822368	1	0.019737	0.157895	0.394737	0.657895	0.947368	0.006579	0.263158	0.453947	0.684211	0.973684	0.361842	0.335526	0.302632	0.10596	0.05298	0.013245	0.006579	0.25	0.434211	0.651316	1	0.019737	0.144737	0.348684	0.684211	0.789474	0.118421	0.532895	0.618421	0.894737	0.973684	0.460526	0.370861	0.026316	0.210526	0.407895	0.671053	0.953947	0.217105
0.371698	0.398113	0.230189	0.272899	0.15864	0.169027	0.003774	0.185849	0.551887	0.791509	1	0.007547	0.281132	0.44717	0.699057	0.99717	0.000943	0.279245	0.523585	0.754717	0.998113	0.674528	0.075472	0.25	0.036827	0.051936	0.002833	0.000943	0.239623	0.435849	0.685849	1	0.204717	0.50566	0.59717	0.733962	0.968868	0.00566	0.128302	0.662264	0.816981	0.993396	0.39717	0.381492	0.00566	0.285849	0.479245	0.703774	0.998113	0.4
0.335329	0.377246	0.287425	0.256	0.186	0.228	0.003992	0.275449	0.552894	0.854291	1	0.00998	0.201597	0.403194	0.704591	0.996008	0.001996	0.297405	0.512974	0.700599	0.962076	0.44511	0.157685	0.397206	0.06	0.076	0.004	0.001996	0.115768	0.349301	0.702595	1	0.125749	0.397206	0.562874	0.746507	0.848303	0.0998	0.329341	0.548902	0.858283	0.984032	0.48503	0.328	0.005988	0.301397	0.491018	0.724551	0.924152	0.411178
0.390805	0.329502	0.279693	0.2	0.257692	0.176923	0.019157	0.256705	0.521073	0.789272	1	0.007663	0.295019	0.544061	0.785441	0.965517	0.003831	0.206897	0.436782	0.643678	0.996169	0.452107	0.164751	0.383142	0.05	0.065385	0.011538	0.003831	0.344828	0.670498	0.816092	1	0.122605	0.172414	0.318008	0.643678	0.704981	0.015326	0.229885	0.394636	0.555556	0.992337	0.40613	0.4	0.02682	0.214559	0.436782	0.609195	0.969349	0.360153
0.365482	0.286802	0.347716	0.190597	0.287166	0.205845	0.002538	0.255076	0.517766	0.738579	0.998731	0.005076	0.239848	0.472081	0.756345	0.993655	0.001269	0.244924	0.496193	0.743655	1	0.468274	0.238579	0.293147	0.105464	0.062262	0.003812	0.001269	0.204315	0.44797	0.733503	1	0.03934	0.248731	0.423858	0.813452	0.998731	0.006345	0.322335	0.576142	0.706853	0.991117	0.567259	0.404066	0.003807	0.261421	0.475888	0.742386	0.997462	0.319797
0.323944	0.341549	0.334507	0.183746	0.222615	0.268551	0.010563	0.34507	0.542254	0.795775	1	0.007042	0.190141	0.380282	0.679577	0.989437	0.003521	0.214789	0.528169	0.753521	0.996479	0.475352	0.179577	0.34507	0.056537	0.070671	0.007067	0.003521	0.302817	0.59507	0.84507	1	0.010563	0.070423	0.228873	0.56338	0.883803	0.098592	0.278169	0.454225	0.725352	0.975352	0.507042	0.438163	0.014085	0.207746	0.433099	0.683099	0.985915	0.352113
0.411043	0.251534	0.337423	0.160494	0.265432	0.185185	0.02454	0.276074	0.552147	0.846626	1	0.01227	0.202454	0.460123	0.668712	0.871166	0.006135	0.220859	0.435583	0.717791	0.98773	0.404908	0.294479	0.300613	0.080247	0.04321	0.018519	0.006135	0.122699	0.380368	0.533742	1	0.079755	0.208589	0.398773	0.711656	0.803681	0.159509	0.558282	0.638037	0.90184	0.981595	0.453988	0.296296	0.079755	0.251534	0.429448	0.687117	0.957055	0.233129
0.339726	0.386301	0.273973	0.228022	0.211538	0.236264	0.005479	0.20274	0.520548	0.769863	0.994521	0.013699	0.254795	0.457534	0.70137	1	0.00274	0.265753	0.528767	0.747945	0.969863	0.69589	0.057534	0.246575	0.098901	0.098901	0.005495	0.00274	0.230137	0.468493	0.720548	1	0.019178	0.257534	0.40274	0.526027	0.857534	0.084932	0.339726	0.646575	0.8	0.994521	0.30137	0.505495	0.013699	0.271233	0.512329	0.734247	0.989041	0.383562
0.373626	0.344041	0.282333	0.236041	0.205584	0.193739	0.002536	0.202029	0.431107	0.716822	0.999155	0.001691	0.258664	0.509721	0.75317	0.995773	0.000845	0.344041	0.543533	0.764159	1	0.415046	0.114117	0.470837	0.038917	0.093063	0.003384	0.000845	0.209637	0.46492	0.726965	1	0.034658	0.474218	0.621302	0.897718	0.989856	0.003381	0.248521	0.482671	0.760778	0.993238	0.457312	0.328257	0.003381	0.393068	0.596788	0.795435	0.997464	0.373626
0.23048	0.508937	0.260583	0.231638	0.140301	0.237288	0.009407	0.160865	0.416745	0.727187	1	0.001881	0.25682	0.486359	0.746943	0.999059	0.000941	0.345249	0.554092	0.775165	0.997178	0.658514	0.130762	0.210724	0.065913	0.043315	0.003766	0.000941	0.231421	0.441204	0.736595	1	0.143932	0.249294	0.468485	0.712135	0.947319	0.008467	0.278457	0.549389	0.837253	0.995296	0.607714	0.295669	0.006585	0.328316	0.530574	0.761054	0.997178	0.523048
0.329624	0.354659	0.315716	0.220056	0.21727	0.233983	0.006954	0.305981	0.567455	0.802503	0.998609	0.002782	0.196106	0.450626	0.714882	0.995828	0.001391	0.225313	0.50904	0.727399	1	0.426982	0.109875	0.463143	0.050139	0.091922	0.005571	0.001391	0.242003	0.421419	0.659249	1	0.082058	0.214186	0.446453	0.535466	0.795549	0.019471	0.260083	0.61057	0.838665	0.987483	0.49235	0.426184	0.005563	0.261474	0.489569	0.668985	0.993046	0.392211
0.341818	0.298182	0.36	0.193078	0.271403	0.214936	0.003636	0.267273	0.512727	0.769091	1	0.012727	0.201818	0.445455	0.66	0.996364	0.001818	0.292727	0.529091	0.778182	0.992727	0.425455	0.085455	0.489091	0.041894	0.081967	0.001821	0.001818	0.256364	0.427273	0.650909	1	0.005455	0.214545	0.34	0.534545	0.612727	0.04	0.309091	0.643636	0.807273	0.996364	0.572727	0.404372	0.007273	0.232727	0.529091	0.730909	0.996364	0.336364
0.320594	0.464968	0.214437	0.240426	0.129787	0.191489	0.006369	0.212314	0.422505	0.842887	0.995754	0.004246	0.29087	0.537155	0.70276	1	0.002123	0.22293	0.443737	0.660297	0.95966	0.685775	0.080679	0.233546	0.040426	0.057447	0.002128	0.002123	0.265393	0.503185	0.675159	1	0.014862	0.150743	0.193206	0.271762	0.859873	0.029724	0.301486	0.749469	0.834395	0.980892	0.467091	0.331915	0.008493	0.216561	0.477707	0.622081	0.95966	0.469214
0.356522	0.352174	0.291304	0.231441	0.218341	0.20524	0.008696	0.195652	0.53913	0.730435	1	0.03913	0.273913	0.426087	0.743478	0.986957	0.004348	0.282609	0.517391	0.76087	0.991304	0.434783	0.282609	0.282609	0.087336	0.061135	0.008734	0.004348	0.234783	0.430435	0.678261	1	0.013043	0.213043	0.547826	0.76087	0.978261	0.091304	0.286957	0.508696	0.721739	0.873913	0.6	0.384279	0.021739	0.282609	0.486957	0.708696	0.978261	0.334783
0.297143	0.411429	0.291429	0.293103	0.172414	0.201149	0.022857	0.365714	0.571429	0.805714	1	0.011429	0.194286	0.377143	0.691429	0.994286	0.005714	0.245714	0.497143	0.754286	0.971429	0.28	0.28	0.44	0.04023	0.109195	0.017241	0.005714	0.154286	0.285714	0.588571	1	0.234286	0.76	0.828571	0.908571	0.982857	0.011429	0.2	0.445714	0.577143	0.748571	0.445714	0.505747	0.017143	0.262857	0.497143	0.691429	0.971429	0.434286
0.324042	0.412892	0.263066	0.26178	0.148342	0.230366	0.005226	0.290941	0.517422	0.745645	1	0.003484	0.249129	0.583624	0.799652	0.998258	0.001742	0.200348	0.372822	0.585366	0.994774	0.529617	0.148084	0.3223	0.052356	0.073298	0.006981	0.001742	0.336237	0.679443	0.8223	1	0.085366	0.278746	0.409408	0.574913	0.958188	0.019164	0.172474	0.355401	0.527875	0.994774	0.445993	0.279232	0.019164	0.19338	0.372822	0.578397	0.994774	0.439024
0.485537	0.245868	0.268595	0.244306	0.26501	0.140787	0.004132	0.254132	0.508264	0.716942	0.989669	0.006198	0.27686	0.553719	0.809917	0.993802	0.002066	0.188017	0.433884	0.752066	1	0.504132	0.128099	0.367769	0.060041	0.076605	0.00207	0.002066	0.402893	0.628099	0.807851	1	0.012397	0.105372	0.328512	0.433884	0.882231	0.008264	0.216942	0.382231	0.652893	0.985537	0.365702	0.430642	0.008264	0.192149	0.392562	0.727273	0.971074	0.297521
0.32153	0.40085	0.27762	0.239716	0.191489	0.204255	0.002833	0.276204	0.525496	0.774788	0.997167	0.004249	0.216714	0.432011	0.720963	1	0.001416	0.273371	0.542493	0.752125	0.990085	0.562323	0.101983	0.335694	0.036879	0.087943	0.002837	0.001416	0.314448	0.502833	0.800283	1	0.157224	0.345609	0.750708	0.827195	0.917847	0.016997	0.194051	0.466006	0.651558	0.947592	0.477337	0.371631	0.016997	0.280453	0.5	0.752125	0.990085	0.439093
0.359756	0.420732	0.219512	0.276074	0.202454	0.153374	0.02439	0.280488	0.52439	0.72561	0.97561	0.012195	0.176829	0.365854	0.670732	0.987805	0.006098	0.439024	0.634146	0.804878	1	0.45122	0.195122	0.353659	0.06135	0.07362	0	0.006098	0.317073	0.432927	0.682927	1	0.268293	0.518293	0.652439	0.823171	0.902439	0.018293	0.146341	0.5	0.707317	0.969512	0.292683	0.404908	0.030488	0.481707	0.621951	0.786585	0.981707	0.414634
0.415873	0.260317	0.32381	0.191083	0.321656	0.178344	0.009524	0.273016	0.520635	0.726984	1	0.019048	0.184127	0.422222	0.75873	0.993651	0.003175	0.247619	0.501587	0.777778	0.996825	0.212698	0.066667	0.720635	0.041401	0.079618	0.003185	0.003175	0.184127	0.412698	0.539683	1	0.11746	0.396825	0.485714	0.533333	0.996825	0.012698	0.263492	0.565079	0.755556	0.971429	0.450794	0.528662	0.012698	0.212698	0.47619	0.777778	0.996825	0.307937
0.298337	0.391892	0.309771	0.239334	0.194589	0.255983	0.005198	0.254678	0.497921	0.774428	1	0.002079	0.247401	0.515593	0.730769	0.995842	0.00104	0.241164	0.486486	0.741164	0.997921	0.489605	0.22973	0.280665	0.094693	0.057232	0.003122	0.00104	0.213098	0.493763	0.748441	1	0.003119	0.164241	0.389813	0.790021	0.997921	0.008316	0.338877	0.572765	0.726611	0.992723	0.547817	0.382934	0.003119	0.254678	0.5	0.748441	0.997921	0.432432
0.388102	0.380548	0.23135	0.258034	0.175803	0.180529	0.003777	0.189802	0.527856	0.76865	1	0.007554	0.282342	0.450425	0.699717	0.997167	0.000944	0.309726	0.538244	0.759207	0.998111	0.654391	0.081209	0.2644	0.038752	0.067108	0.004726	0.000944	0.255902	0.444759	0.685552	1	0.082153	0.422096	0.580737	0.858357	0.964117	0.005666	0.128423	0.647781	0.786591	0.990557	0.341832	0.347826	0.002833	0.325779	0.552408	0.783758	0.983003	0.413598
0.23374	0.534553	0.231707	0.224033	0.118126	0.201629	0.004065	0.174797	0.357724	0.819106	0.995935	0.006098	0.315041	0.565041	0.745935	1	0.002033	0.215447	0.424797	0.723577	0.997967	0.554878	0.160569	0.284553	0.065173	0.044807	0.008147	0.002033	0.256098	0.50813	0.729675	1	0.067073	0.172764	0.365854	0.585366	0.934959	0.083333	0.207317	0.522358	0.863821	0.987805	0.520325	0.325866	0.01626	0.310976	0.583333	0.745935	0.969512	0.52439
0.353033	0.33437	0.312597	0.224299	0.23676	0.211838	0.004666	0.203733	0.466563	0.696734	0.998445	0.00311	0.283048	0.536547	0.765163	0.99689	0.001555	0.227061	0.517885	0.760498	1	0.407465	0.066874	0.525661	0.029595	0.104361	0.001558	0.001555	0.292379	0.55832	0.810264	1	0.060653	0.11042	0.744946	0.88647	0.970451	0.00311	0.242613	0.458787	0.645412	0.993779	0.556765	0.392523	0.007776	0.255054	0.544323	0.77916	0.992224	0.362364
0.311248	0.436055	0.252696	0.226852	0.158951	0.231481	0.009245	0.249615	0.497689	0.742681	0.998459	0.003082	0.275809	0.530046	0.762712	1	0.001541	0.215716	0.454545	0.708783	0.989214	0.734977	0.104777	0.160247	0.046296	0.052469	0.003086	0.001541	0.300462	0.531587	0.745763	1	0.006163	0.228043	0.545455	0.864407	0.959938	0.01849	0.171032	0.337442	0.493066	0.924499	0.429892	0.330247	0.006163	0.223421	0.53775	0.781202	0.992296	0.428351
0.375	0.350962	0.274038	0.280193	0.198068	0.241546	0.009615	0.230769	0.509615	0.730769	1	0.024038	0.307692	0.514423	0.783654	0.990385	0.004808	0.211538	0.432692	0.716346	0.980769	0.331731	0.283654	0.384615	0.10628	0.048309	0	0.004808	0.216346	0.471154	0.798077	1	0.014423	0.197115	0.403846	0.634615	0.990385	0.052885	0.322115	0.576923	0.730769	0.879808	0.451923	0.463768	0.019231	0.288462	0.514423	0.701923	0.980769	0.326923
0.415929	0.19469	0.389381	0.116071	0.303571	0.169643	0.026549	0.185841	0.442478	0.752212	1	0.017699	0.221239	0.477876	0.654867	0.814159	0.00885	0.265487	0.566372	0.778761	0.955752	0.371681	0.221239	0.40708	0.107143	0.053571	0	0.00885	0.19469	0.353982	0.752212	1	0.035398	0.247788	0.362832	0.707965	0.831858	0.097345	0.442478	0.548673	0.876106	0.982301	0.469027	0.428571	0.035398	0.274336	0.477876	0.725664	0.955752	0.221239
0.47166	0.42915	0.09919	0.509128	0.103448	0.048682	0.006073	0.287449	0.550607	0.755061	0.997976	0.004049	0.279352	0.520243	0.787449	1	0.002024	0.078947	0.216599	0.309717	0.919028	0.789474	0.115385	0.095142	0.044625	0.024341	0	0.002024	0.38664	0.58502	0.793522	1	0.006073	0.078947	0.214575	0.291498	0.62753	0.030364	0.091093	0.240891	0.311741	0.84413	0.157895	0.154158	0.008097	0.080972	0.216599	0.275304	0.821862	0.431174
0.414414	0.283784	0.301802	0.257919	0.20362	0.18552	0.009009	0.265766	0.481982	0.783784	0.990991	0.013514	0.220721	0.536036	0.761261	0.986486	0.004505	0.207207	0.459459	0.671171	1	0.342342	0.063063	0.594595	0.027149	0.099548	0	0.004505	0.292793	0.378378	0.675676	1	0.603604	0.612613	0.630631	0.657658	0.684685	0.022523	0.225225	0.495495	0.774775	0.986486	0.481982	0.479638	0.013514	0.225225	0.486486	0.72973	0.986486	0.297297
0.214953	0.649533	0.135514	0.253521	0.089202	0.131455	0.014019	0.135514	0.299065	0.626168	1	0.009346	0.369159	0.565421	0.733645	0.995327	0.004673	0.116822	0.257009	0.747664	0.976636	0.780374	0.163551	0.056075	0.084507	0.018779	0.00939	0.004673	0.378505	0.574766	0.794393	1	0.046729	0.079439	0.168224	0.280374	0.859813	0.009346	0.018692	0.17757	0.308411	0.32243	0.635514	0.319249	0.023364	0.359813	0.584112	0.761682	0.976636	0.668224
0.271363	0.517939	0.210698	0.213446	0.106397	0.203003	0.001305	0.251794	0.478147	0.761252	0.998043	0.003262	0.223744	0.480757	0.690802	0.997391	0.000652	0.304631	0.581213	0.811481	1	0.560339	0.048271	0.391389	0.031984	0.069843	0.001958	0.000652	0.227658	0.40574	0.660144	1	0.014351	0.282453	0.531637	0.947815	0.998695	0.020874	0.393346	0.617091	0.804305	0.947162	0.630789	0.278068	0.001957	0.22244	0.493803	0.73516	0.998695	0.502283
0.375	0.326923	0.298077	0.231884	0.26087	0.15942	0.009615	0.254808	0.509615	0.730769	0.985577	0.038462	0.230769	0.403846	0.663462	1	0.004808	0.206731	0.591346	0.75	0.990385	0.519231	0.153846	0.326923	0.086957	0.067633	0	0.004808	0.278846	0.408654	0.701923	1	0.009615	0.067308	0.591346	0.75	0.9375	0.096154	0.201923	0.567308	0.802885	0.995192	0.524038	0.376812	0.014423	0.346154	0.528846	0.759615	0.995192	0.336538
0.405556	0.272222	0.322222	0.222841	0.259053	0.167131	0.005556	0.227778	0.455556	0.719444	1	0.019444	0.313889	0.569444	0.841667	0.997222	0.002778	0.205556	0.477778	0.708333	0.955556	0.352778	0.216667	0.430556	0.08078	0.075209	0.002786	0.002778	0.247222	0.483333	0.802778	1	0.008333	0.175	0.391667	0.552778	0.894444	0.022222	0.291667	0.6	0.777778	0.958333	0.541667	0.395543	0.008333	0.280556	0.541667	0.775	0.955556	0.297222
0.31694	0.196721	0.486339	0.115385	0.274725	0.192308	0.010929	0.355191	0.557377	0.879781	1	0.043716	0.240437	0.584699	0.781421	0.978142	0.005464	0.202186	0.442623	0.644809	0.989071	0.054645	0	0.945355	0	0.021978	0	0.005464	0.010929	0.972678	0.983607	1	0	0	0	0	0	0.016393	0.245902	0.480874	0.726776	0.967213	0.601093	0.318681	0.016393	0.273224	0.464481	0.693989	0.945355	0.174863
0.25641	0.452991	0.290598	0.248927	0.128755	0.291845	0.008547	0.226496	0.423077	0.709402	0.995726	0.017094	0.25641	0.555556	0.74359	0.982906	0.004274	0.24359	0.435897	0.75641	1	0.405983	0.179487	0.41453	0.072961	0.098712	0.004292	0.004274	0.179487	0.5	0.717949	1	0.012821	0.269231	0.478632	0.67094	0.905983	0.038462	0.311966	0.452991	0.769231	0.987179	0.602564	0.403433	0.012821	0.264957	0.504274	0.739316	0.991453	0.42735
0.271501	0.426644	0.301855	0.212838	0.177365	0.287162	0.010118	0.241147	0.460371	0.772344	1	0.005059	0.27656	0.56661	0.745363	0.996627	0.001686	0.219224	0.416526	0.709949	0.998314	0.448567	0.06914	0.482293	0.027027	0.091216	0.003378	0.001686	0.32715	0.504216	0.647555	1	0.180438	0.236088	0.359191	0.413153	0.6543	0.010118	0.165261	0.60371	0.827993	0.993255	0.536256	0.418919	0.006745	0.234401	0.485666	0.765599	0.989882	0.438449
0.403162	0.335968	0.26087	0.231683	0.215842	0.186139	0.003953	0.254941	0.472332	0.701581	0.998024	0.007905	0.243083	0.557312	0.822134	1	0.001976	0.235178	0.468379	0.70751	0.978261	0.312253	0.063241	0.624506	0.033663	0.069307	0.005941	0.001976	0.539526	0.754941	0.859684	1	0.766798	0.879447	0.924901	0.948617	0.976285	0.019763	0.1917	0.359684	0.55336	0.970356	0.375494	0.447525	0.009881	0.205534	0.468379	0.719368	0.978261	0.34585
0.320588	0.344118	0.335294	0.188791	0.265487	0.256637	0.005882	0.229412	0.567647	0.782353	0.991176	0.008824	0.252941	0.438235	0.688235	1	0.002941	0.247059	0.517647	0.770588	0.988235	0.426471	0.320588	0.252941	0.123894	0.058997	0.0059	0.002941	0.208824	0.397059	0.697059	1	0.008824	0.126471	0.482353	0.761765	0.988235	0.273529	0.435294	0.582353	0.732353	0.952941	0.667647	0.336283	0.008824	0.244118	0.505882	0.729412	0.988235	0.405882
0.33121	0.318471	0.350318	0.230769	0.25	0.269231	0.012739	0.312102	0.509554	0.783439	1	0.025478	0.210191	0.496815	0.694268	0.974522	0.006369	0.197452	0.452229	0.738854	0.980892	0.503185	0.165605	0.33121	0.064103	0.064103	0	0.006369	0.165605	0.573248	0.847134	1	0.082803	0.140127	0.273885	0.541401	0.923567	0.178344	0.343949	0.44586	0.700637	0.828025	0.528662	0.461538	0.019108	0.216561	0.433121	0.700637	0.980892	0.324841
0.447587	0.287854	0.264559	0.241667	0.268333	0.151667	0.003328	0.237937	0.46589	0.700499	0.996672	0.008319	0.289517	0.562396	0.806988	0.998336	0.001664	0.224626	0.472546	0.72213	1	0.299501	0.021631	0.678869	0.011667	0.075	0.001667	0.001664	0.341098	0.718802	0.843594	1	0.63228	0.732113	0.818636	0.823627	0.831947	0.021631	0.221298	0.437604	0.658902	0.991681	0.339434	0.463333	0.014975	0.241265	0.52579	0.780366	0.990017	0.30782
0.340102	0.324873	0.335025	0.180662	0.254453	0.185751	0.007614	0.256345	0.51269	0.748731	1	0.005076	0.124365	0.408629	0.751269	0.994924	0.002538	0.34264	0.540609	0.741117	0.989848	0.309645	0.030457	0.659898	0.017812	0.073791	0.002545	0.002538	0.081218	0.213198	0.761421	1	0.022843	0.106599	0.857868	0.93401	0.941624	0.162437	0.365482	0.555838	0.728426	0.98731	0.51269	0.396947	0.010152	0.340102	0.540609	0.741117	0.989848	0.35533
0.301538	0.363077	0.335385	0.240741	0.20679	0.228395	0.006154	0.246154	0.535385	0.775385	1	0.012308	0.236923	0.433846	0.673846	0.950769	0.003077	0.243077	0.553846	0.772308	0.993846	0.4	0.163077	0.436923	0.055556	0.080247	0	0.003077	0.255385	0.504615	0.72	1	0.015385	0.107692	0.44	0.572308	0.787692	0.043077	0.230769	0.56	0.818462	0.993846	0.606154	0.388889	0.012308	0.2	0.458462	0.692308	0.984615	0.36
0.344624	0.344624	0.310751	0.20649	0.20649	0.234513	0.007364	0.297496	0.478645	0.689249	0.998527	0.002946	0.189985	0.438881	0.712813	1	0.001473	0.273932	0.583211	0.795287	0.997054	0.425626	0.064801	0.509573	0.029499	0.097345	0.00885	0.001473	0.151694	0.34757	0.631811	1	0.02651	0.104566	0.207658	0.248895	0.365243	0.017673	0.480118	0.656848	0.83947	0.986745	0.452135	0.39823	0.004418	0.285714	0.600884	0.798233	0.992636	0.388807
0.325	0.291667	0.383333	0.193277	0.277311	0.226891	0.016667	0.2	0.5	0.725	0.991667	0.025	0.325	0.466667	0.716667	0.966667	0.008333	0.191667	0.45	0.741667	1	0.283333	0.016667	0.7	0.016807	0.084034	0	0.008333	0.266667	0.491667	0.791667	1	0.508333	0.508333	0.508333	0.508333	0.516667	0.016667	0.225	0.466667	0.725	0.958333	0.566667	0.436975	0.033333	0.241667	0.458333	0.741667	0.958333	0.3
0.28223	0.38676	0.33101	0.227273	0.192308	0.262238	0.010453	0.212544	0.470383	0.714286	0.996516	0.017422	0.261324	0.45993	0.738676	0.97561	0.003484	0.247387	0.526132	0.759582	1	0.376307	0.275261	0.348432	0.108392	0.094406	0.01049	0.003484	0.205575	0.383275	0.773519	1	0.006969	0.219512	0.456446	0.634146	0.979094	0.04878	0.414634	0.567944	0.735192	0.944251	0.578397	0.440559	0.006969	0.247387	0.505226	0.738676	0.993031	0.456446
0.288835	0.378641	0.332524	0.184915	0.206813	0.248175	0.026699	0.293689	0.492718	0.762136	1	0.007282	0.199029	0.451456	0.711165	0.997573	0.002427	0.257282	0.543689	0.781553	0.992718	0.485437	0.143204	0.371359	0.053528	0.072993	0.009732	0.002427	0.264563	0.548544	0.771845	1	0.009709	0.436893	0.633495	0.723301	0.973301	0.024272	0.13835	0.407767	0.606796	0.88835	0.614078	0.340633	0.009709	0.237864	0.529126	0.75	0.992718	0.400485
0.377358	0.308176	0.314465	0.253165	0.221519	0.21519	0.018868	0.226415	0.415094	0.666667	1	0.012579	0.320755	0.528302	0.779874	0.993711	0.006289	0.201258	0.503145	0.698113	0.987421	0.383648	0.18239	0.433962	0.044304	0.056962	0.006329	0.006289	0.238994	0.484277	0.798742	1	0.018868	0.056604	0.27673	0.446541	0.559748	0.132075	0.314465	0.610063	0.735849	0.899371	0.515723	0.329114	0.025157	0.283019	0.534591	0.72956	0.987421	0.320755
0.133333	0.348148	0.518519	0.074627	0.141791	0.41791	0.022222	0.251852	0.481481	0.696296	1	0.051852	0.207407	0.503704	0.762963	0.992593	0.007407	0.22963	0.474074	0.711111	0.962963	0.192593	0.059259	0.748148	0.007463	0.052239	0.007463	0.007407	0.266667	0.688889	0.733333	1	0.77037	0.777778	0.792593	0.807407	0.822222	0.014815	0.192593	0.414815	0.607407	0.977778	0.755556	0.208955	0.014815	0.214815	0.422222	0.651852	0.97037	0.362963
0.340708	0.39823	0.261062	0.302222	0.208889	0.186667	0.013274	0.256637	0.486726	0.778761	1	0.00885	0.230088	0.477876	0.738938	0.969027	0.004425	0.216814	0.513274	0.681416	0.99115	0.561947	0.234513	0.20354	0.111111	0.084444	0.004444	0.004425	0.230088	0.433628	0.783186	1	0.017699	0.185841	0.39823	0.654867	0.809735	0.039823	0.513274	0.646018	0.871681	0.946903	0.5	0.337778	0.017699	0.221239	0.460177	0.676991	0.938053	0.424779
0.414414	0.306306	0.279279	0.245455	0.245455	0.154545	0.018018	0.198198	0.495495	0.747748	0.981982	0.009009	0.225225	0.522523	0.72973	1	0.036036	0.234234	0.441441	0.648649	0.972973	0.378378	0.036036	0.585586	0.027273	0.136364	0.009091	0.009009	0.225225	0.495495	0.693694	1	0.531532	0.531532	0.540541	0.891892	0.900901	0.018018	0.252252	0.45045	0.756757	0.990991	0.387387	0.454545	0.036036	0.252252	0.522523	0.756757	0.972973	0.387387
0.367742	0.296774	0.335484	0.207792	0.266234	0.181818	0.012903	0.270968	0.451613	0.767742	1	0.058065	0.309677	0.516129	0.748387	0.987097	0.006452	0.154839	0.425806	0.703226	0.954839	0.464516	0.154839	0.380645	0.051948	0.077922	0.012987	0.006452	0.303226	0.574194	0.754839	1	0.019355	0.051613	0.845161	0.916129	0.954839	0.070968	0.232258	0.387097	0.56129	0.8	0.516129	0.454545	0.025806	0.23871	0.548387	0.780645	0.987097	0.296774
0.273585	0.386792	0.339623	0.228571	0.266667	0.228571	0.056604	0.198113	0.518868	0.688679	0.943396	0.018868	0.254717	0.481132	0.735849	0.990566	0.009434	0.235849	0.443396	0.783019	1	0.481132	0.443396	0.075472	0.171429	0.019048	0	0.009434	0.207547	0.462264	0.679245	1	0.09434	0.226415	0.443396	0.707547	0.896226	0.924528	0.933962	0.95283	0.971698	0.990566	0.443396	0.571429	0.066038	0.254717	0.443396	0.698113	0.971698	0.443396
0.417625	0.291188	0.291188	0.223077	0.223077	0.15	0.038314	0.245211	0.448276	0.678161	0.996169	0.007663	0.16092	0.425287	0.666667	1	0.003831	0.356322	0.643678	0.911877	0.992337	0.199234	0.02682	0.773946	0.007692	0.061538	0	0.003831	0.16092	0.482759	0.555556	1	0.574713	0.574713	0.582375	0.590038	0.597701	0.042146	0.252874	0.517241	0.777778	0.984674	0.32567	0.4	0.05364	0.252874	0.590038	0.739464	0.927203	0.321839
0.312392	0.385542	0.302065	0.236865	0.203273	0.243755	0.002582	0.240103	0.497418	0.746988	1	0.001721	0.254733	0.489673	0.754733	0.998279	0.000861	0.246988	0.502582	0.740103	0.999139	0.39759	0.197935	0.404475	0.087855	0.087855	0.001723	0.000861	0.263339	0.512048	0.748709	1	0.007745	0.248709	0.563683	0.747849	0.993115	0.021515	0.20654	0.459552	0.703098	0.999139	0.628227	0.37037	0.006024	0.245267	0.500861	0.748709	0.998279	0.416523
0.295374	0.3879	0.316726	0.225	0.221429	0.253571	0.049822	0.241993	0.523132	0.75089	1	0.010676	0.231317	0.469751	0.729537	0.992883	0.003559	0.24911	0.498221	0.733096	0.985765	0.572954	0.320285	0.106762	0.132143	0.053571	0.003571	0.003559	0.298932	0.558719	0.772242	1	0.007117	0.224199	0.395018	0.604982	0.893238	0.039146	0.149466	0.516014	0.836299	0.946619	0.637011	0.414286	0.007117	0.213523	0.480427	0.736655	0.985765	0.430605
0.35879	0.319885	0.321326	0.204906	0.246753	0.222222	0.004323	0.282421	0.510086	0.776657	1	0.002882	0.21902	0.471182	0.682997	0.988473	0.001441	0.239193	0.505764	0.762248	0.998559	0.298271	0.10951	0.592219	0.046176	0.08658	0.002886	0.001441	0.178674	0.404899	0.680115	1	0.007205	0.154179	0.237752	0.341499	0.951009	0.023055	0.381844	0.592219	0.81268	0.995677	0.544669	0.41847	0.007205	0.26513	0.494236	0.70317	0.995677	0.361671
0.355372	0.338843	0.305785	0.20332	0.232365	0.228216	0.016529	0.272727	0.504132	0.735537	1	0.008264	0.260331	0.545455	0.768595	0.987603	0.004132	0.177686	0.458678	0.681818	0.991736	0.541322	0.256198	0.202479	0.091286	0.041494	0	0.004132	0.380165	0.64876	0.863636	1	0.070248	0.22314	0.458678	0.68595	0.85124	0.012397	0.136364	0.18595	0.355372	0.628099	0.53719	0.373444	0.012397	0.301653	0.504132	0.690083	0.975207	0.338843
0.286111	0.388889	0.325	0.203343	0.183844	0.270195	0.041667	0.227778	0.511111	0.794444	1	0.005556	0.222222	0.475	0.713889	0.997222	0.002778	0.280556	0.508333	0.719444	0.991667	0.375	0.05	0.575	0.019499	0.086351	0.013928	0.002778	0.122222	0.405556	0.627778	1	0.011111	0.111111	0.141667	0.611111	0.788889	0.030556	0.347222	0.572222	0.794444	0.991667	0.619444	0.284123	0.005556	0.302778	0.494444	0.708333	0.994444	0.416667
0.450704	0.34507	0.204225	0.236749	0.166078	0.176678	0.024648	0.309859	0.570423	0.753521	0.996479	0.007042	0.239437	0.471831	0.742958	1	0.003521	0.183099	0.380282	0.676056	0.992958	0.609155	0.126761	0.264085	0.077739	0.056537	0.007067	0.003521	0.183099	0.426056	0.672535	1	0.038732	0.242958	0.387324	0.806338	0.897887	0.098592	0.433099	0.609155	0.911972	0.985915	0.235915	0.268551	0.014085	0.190141	0.31338	0.566901	0.985915	0.366197
0.319588	0.329897	0.350515	0.229167	0.25	0.25	0.030928	0.185567	0.43299	0.680412	0.989691	0.041237	0.309278	0.587629	0.783505	0.979381	0.010309	0.14433	0.42268	0.701031	1	0.329897	0.14433	0.525773	0.041667	0.083333	0	0.010309	0.164948	0.494845	0.639175	1	0.030928	0.051546	0.092784	0.57732	0.618557	0.195876	0.309278	0.670103	0.824742	0.958763	0.56701	0.416667	0.020619	0.28866	0.57732	0.824742	0.979381	0.371134
0.171233	0.422374	0.406393	0.169336	0.107551	0.329519	0.006849	0.141553	0.43379	0.646119	1	0.004566	0.255708	0.531963	0.757991	0.997717	0.002283	0.248858	0.5	0.760274	0.984018	0.200913	0	0.799087	0	0.064073	0	0.002283	0.050228	0.436073	0.56621	1	0	0	0	0	0	0.057078	0.26484	0.504566	0.767123	0.990868	0.762557	0.173913	0.009132	0.267123	0.502283	0.769406	0.993151	0.408676
0.363354	0.340062	0.296584	0.22395	0.237947	0.195956	0.009317	0.254658	0.458075	0.736025	1	0.003106	0.164596	0.475155	0.753106	0.995342	0.001553	0.341615	0.549689	0.77795	0.993789	0.450311	0.048137	0.501553	0.024883	0.07776	0.00311	0.001553	0.147516	0.399068	0.613354	1	0.065217	0.509317	0.537267	0.565217	0.919255	0.012422	0.321429	0.687888	0.84472	0.995342	0.467391	0.435459	0.018634	0.336957	0.551242	0.77795	0.993789	0.357143
0.172973	0.362162	0.464865	0.11413	0.146739	0.380435	0.016216	0.362162	0.572973	0.762162	0.994595	0.010811	0.216216	0.454054	0.751351	1	0.005405	0.254054	0.475676	0.718919	0.983784	0.264865	0.032432	0.702703	0.021739	0.076087	0	0.005405	0.178378	0.535135	0.740541	1	0.524324	0.524324	0.718919	0.724324	0.735135	0.037838	0.264865	0.464865	0.762162	0.978378	0.772973	0.163043	0.037838	0.248649	0.443243	0.708108	0.983784	0.340541
0.304348	0.355072	0.34058	0.262774	0.189781	0.277372	0.021739	0.15942	0.391304	0.688406	0.963768	0.014493	0.26087	0.528986	0.797101	0.985507	0.007246	0.217391	0.557971	0.724638	1	0.318841	0.101449	0.57971	0.029197	0.145985	0	0.007246	0.253623	0.362319	0.65942	1	0.391304	0.405797	0.434783	0.485507	0.514493	0.036232	0.202899	0.615942	0.826087	0.992754	0.507246	0.394161	0.028986	0.347826	0.528986	0.681159	0.971014	0.384058
0.293333	0.42	0.286667	0.257525	0.190635	0.227425	0.013333	0.213333	0.436667	0.736667	0.993333	0.006667	0.3	0.573333	0.753333	1	0.003333	0.26	0.466667	0.74	0.97	0.473333	0.243333	0.283333	0.093645	0.053512	0	0.003333	0.23	0.546667	0.746667	1	0.03	0.103333	0.253333	0.396667	0.743333	0.323333	0.446667	0.616667	0.896667	0.986667	0.536667	0.38796	0.026667	0.266667	0.466667	0.693333	0.98	0.423333
0.277186	0.381663	0.341151	0.205128	0.192308	0.262821	0.046908	0.287846	0.5629	0.765458	0.997868	0.010661	0.247335	0.452026	0.729211	1	0.002132	0.226013	0.477612	0.742004	0.993603	0.38806	0.076759	0.535181	0.036325	0.09188	0.00641	0.002132	0.240938	0.567164	0.837953	1	0.091684	0.166311	0.763326	0.797441	0.989339	0.006397	0.268657	0.469083	0.637527	0.936034	0.622601	0.311966	0.008529	0.247335	0.492537	0.746269	0.989339	0.36887
0.241843	0.525912	0.232246	0.253846	0.103846	0.225	0.011516	0.264875	0.483685	0.696737	0.988484	0.003839	0.190019	0.464491	0.723608	1	0.001919	0.347409	0.598848	0.808061	0.992322	0.658349	0.230326	0.111324	0.078846	0.021154	0.001923	0.001919	0.193858	0.412668	0.710173	1	0.264875	0.451056	0.583493	0.731286	0.865643	0.011516	0.036468	0.915547	0.942418	0.990403	0.493282	0.326923	0.007678	0.333973	0.523992	0.75048	0.992322	0.545106
0.32	0.377143	0.302857	0.247126	0.235632	0.189655	0.034286	0.291429	0.565714	0.834286	0.994286	0.028571	0.182857	0.491429	0.674286	0.988571	0.005714	0.211429	0.445714	0.737143	1	0.314286	0.342857	0.342857	0.086207	0.04023	0.005747	0.005714	0.171429	0.405714	0.662857	1	0.017143	0.24	0.451429	0.588571	0.714286	0.085714	0.377143	0.8	0.885714	0.971429	0.52	0.45977	0.028571	0.274286	0.52	0.742857	0.971429	0.371429
0.315657	0.434343	0.25	0.247788	0.166877	0.19469	0.002525	0.261364	0.503788	0.794192	0.998737	0.010101	0.207071	0.440657	0.70202	0.996212	0.001263	0.316919	0.57702	0.770202	1	0.714646	0.068182	0.217172	0.036662	0.061947	0.001264	0.001263	0.228535	0.44697	0.664141	1	0.003788	0.308081	0.578283	0.632576	0.972222	0.011364	0.368687	0.733586	0.838384	0.988636	0.400253	0.364096	0.003788	0.255051	0.536616	0.717172	0.994949	0.454545
0.37037	0.328704	0.300926	0.204651	0.227907	0.167442	0.009259	0.194444	0.50463	0.74537	1	0.018519	0.300926	0.462963	0.75	0.99537	0.00463	0.268519	0.513889	0.726852	0.962963	0.449074	0.143519	0.407407	0.055814	0.102326	0.027907	0.00463	0.217593	0.527778	0.759259	1	0.203704	0.342593	0.722222	0.824074	0.972222	0.046296	0.240741	0.398148	0.601852	0.921296	0.50463	0.390698	0.055556	0.319444	0.523148	0.726852	0.976852	0.328704
0.336788	0.284974	0.378238	0.197917	0.265625	0.1875	0.015544	0.217617	0.507772	0.746114	1	0.020725	0.207254	0.42487	0.803109	0.989637	0.005181	0.279793	0.487047	0.668394	0.994819	0.352332	0.165803	0.481865	0.0625	0.083333	0	0.005181	0.227979	0.533679	0.88601	1	0.015544	0.259067	0.357513	0.398964	0.958549	0.07772	0.279793	0.53886	0.704663	0.860104	0.595855	0.40625	0.010363	0.26943	0.466321	0.647668	0.979275	0.305699
0.281818	0.410909	0.307273	0.23133	0.191257	0.258652	0.009091	0.296364	0.503636	0.794545	0.992727	0.003636	0.243636	0.469091	0.705455	1	0.001818	0.223636	0.510909	0.745455	0.998182	0.689091	0.085455	0.225455	0.045537	0.04918	0.001821	0.001818	0.276364	0.503636	0.781818	1	0.070909	0.14	0.405455	0.656364	0.950909	0.014545	0.163636	0.476364	0.578182	0.996364	0.632727	0.309654	0.014545	0.230909	0.507273	0.729091	0.996364	0.42
0.380952	0.326531	0.292517	0.232877	0.232877	0.219178	0.013605	0.217687	0.55102	0.741497	0.979592	0.020408	0.251701	0.414966	0.727891	0.993197	0.006803	0.244898	0.517007	0.755102	1	0.544218	0.22449	0.231293	0.09589	0.082192	0.027397	0.006803	0.244898	0.462585	0.70068	1	0.020408	0.068027	0.176871	0.564626	0.952381	0.37415	0.489796	0.782313	0.836735	0.986395	0.510204	0.410959	0.020408	0.244898	0.462585	0.734694	0.952381	0.360544
0.286136	0.362832	0.351032	0.192308	0.186391	0.278107	0.0059	0.253687	0.477876	0.743363	0.9941	0.011799	0.224189	0.530973	0.740413	1	0.00295	0.241888	0.480826	0.746313	0.99705	0.448378	0.188791	0.362832	0.094675	0.088757	0	0.00295	0.221239	0.528024	0.761062	1	0.0059	0.20649	0.477876	0.707965	0.99705	0.073746	0.339233	0.513274	0.722714	0.929204	0.60177	0.378698	0.00885	0.241888	0.495575	0.731563	0.99705	0.362832
0.322667	0.357333	0.32	0.197861	0.200535	0.224599	0.008	0.258667	0.517333	0.746667	1	0.016	0.261333	0.493333	0.730667	0.992	0.002667	0.232	0.488	0.76	0.997333	0.368	0.152	0.48	0.066845	0.104278	0.002674	0.002667	0.237333	0.496	0.669333	1	0.008	0.114667	0.330667	0.514667	0.877333	0.064	0.296	0.608	0.778667	0.992	0.696	0.294118	0.008	0.282667	0.496	0.728	0.994667	0.352
0.284507	0.402817	0.312676	0.231638	0.172316	0.276836	0.011268	0.35493	0.569014	0.811268	1	0.005634	0.185915	0.439437	0.707042	0.994366	0.002817	0.267606	0.447887	0.709859	0.991549	0.594366	0.166197	0.239437	0.067797	0.050847	0	0.002817	0.174648	0.346479	0.690141	1	0.061972	0.642254	0.709859	0.819718	0.926761	0.025352	0.377465	0.467606	0.625352	0.991549	0.602817	0.361582	0.008451	0.287324	0.532394	0.735211	0.991549	0.408451
0.318841	0.357488	0.323671	0.218447	0.199029	0.208738	0.009662	0.289855	0.502415	0.73913	0.990338	0.033816	0.222222	0.52657	0.714976	0.985507	0.004831	0.202899	0.463768	0.768116	1	0.584541	0.256039	0.15942	0.101942	0.033981	0.004854	0.004831	0.304348	0.594203	0.816425	1	0.014493	0.21256	0.47343	0.676329	0.966184	0.048309	0.26087	0.347826	0.386473	0.507246	0.502415	0.368932	0.014493	0.241546	0.47343	0.763285	0.985507	0.429952
0.226415	0.311321	0.462264	0.152381	0.209524	0.314286	0.018868	0.141509	0.443396	0.556604	0.915094	0.113208	0.264151	0.566038	0.726415	1	0.009434	0.283019	0.5	0.783019	0.990566	0.386792	0.103774	0.509434	0.057143	0.057143	0	0.009434	0.169811	0.490566	0.792453	1	0.839623	0.849057	0.90566	0.933962	0.981132	0.04717	0.273585	0.40566	0.584906	0.716981	0.716981	0.266667	0.028302	0.283019	0.575472	0.754717	0.971698	0.301887
0.314363	0.360434	0.325203	0.223881	0.206242	0.226594	0.00542	0.245257	0.487805	0.727642	1	0.004065	0.252033	0.495935	0.749322	0.998645	0.001355	0.243902	0.51626	0.752033	0.98916	0.575881	0.208672	0.215447	0.089552	0.040706	0.002714	0.001355	0.300813	0.604336	0.761518	1	0.062331	0.311653	0.482385	0.598916	0.98916	0.004065	0.191057	0.298103	0.907859	0.96206	0.460705	0.455902	0.004065	0.238482	0.409214	0.714092	0.99458	0.432249
0.256966	0.464396	0.278638	0.245342	0.139752	0.236025	0.009288	0.164087	0.402477	0.690402	0.990712	0.006192	0.275542	0.517028	0.79257	1	0.003096	0.260062	0.52322	0.73065	0.996904	0.411765	0.164087	0.424149	0.083851	0.090062	0.003106	0.003096	0.204334	0.486068	0.696594	1	0.049536	0.229102	0.377709	0.640867	0.907121	0.012384	0.28483	0.517028	0.786378	0.981424	0.628483	0.347826	0.009288	0.244582	0.47678	0.712074	0.993808	0.464396
0.390909	0.318182	0.290909	0.187215	0.242009	0.200913	0.009091	0.295455	0.490909	0.672727	0.972727	0.018182	0.204545	0.495455	0.763636	1	0.004545	0.254545	0.509091	0.786364	0.990909	0.209091	0.018182	0.772727	0.009132	0.082192	0	0.004545	0.722727	0.881818	0.936364	1	0.740909	0.740909	0.745455	0.75	0.754545	0.009091	0.213636	0.422727	0.622727	0.954545	0.440909	0.511416	0.018182	0.231818	0.422727	0.722727	0.959091	0.313636
0.302583	0.343173	0.354244	0.17037	0.251852	0.255556	0.00738	0.210332	0.453875	0.730627	0.98155	0.02583	0.258303	0.520295	0.760148	1	0.00369	0.250923	0.512915	0.738007	0.99262	0.383764	0.059041	0.557196	0.014815	0.096296	0.014815	0.00369	0.280443	0.428044	0.715867	1	0.339483	0.350554	0.383764	0.797048	0.878229	0.01476	0.195572	0.535055	0.767528	0.948339	0.638376	0.385185	0.01845	0.265683	0.505535	0.697417	0.97417	0.350554
0.291667	0.435606	0.272727	0.220532	0.155894	0.220532	0.011364	0.329545	0.522727	0.795455	1	0.018939	0.19697	0.424242	0.708333	0.996212	0.003788	0.223485	0.484848	0.742424	0.981061	0.32197	0	0.67803	0	0.098859	0	0.003788	0.155303	0.401515	0.621212	1	0	0	0	0	0	0.015152	0.306818	0.5	0.761364	0.992424	0.636364	0.334601	0.015152	0.265152	0.530303	0.746212	0.984848	0.462121
0.375262	0.371069	0.253669	0.233193	0.216387	0.176471	0.010482	0.176101	0.377358	0.681342	0.997904	0.004193	0.243187	0.48847	0.731656	1	0.002096	0.404612	0.60587	0.819706	0.987421	0.530398	0.155136	0.314465	0.069328	0.048319	0.002101	0.002096	0.205451	0.396226	0.721174	1	0.32914	0.530398	0.702306	0.796646	0.989518	0.008386	0.320755	0.429769	0.660377	0.914046	0.461216	0.340336	0.008386	0.457023	0.60587	0.794549	0.993711	0.429769
0.387097	0.354839	0.258065	0.305556	0.189815	0.185185	0.009217	0.304147	0.543779	0.769585	1	0.02765	0.258065	0.552995	0.75576	0.986175	0.004608	0.142857	0.364055	0.599078	0.958525	0.382488	0.041475	0.576037	0.027778	0.064815	0.009259	0.004608	0.16129	0.423963	0.764977	1	0.078341	0.082949	0.359447	0.958525	0.97235	0.018433	0.267281	0.516129	0.732719	0.926267	0.414747	0.37037	0.023041	0.221198	0.460829	0.695853	0.958525	0.437788
0.294118	0.352941	0.352941	0.184211	0.190789	0.315789	0.019608	0.346405	0.529412	0.686275	1	0.026144	0.222222	0.457516	0.699346	0.986928	0.006536	0.196078	0.509804	0.784314	0.993464	0.51634	0.294118	0.189542	0.092105	0.026316	0	0.006536	0.281046	0.470588	0.666667	1	0.183007	0.346405	0.777778	0.895425	0.986928	0.013072	0.052288	0.098039	0.143791	0.601307	0.555556	0.421053	0.026144	0.183007	0.542484	0.764706	0.973856	0.366013
0.383721	0.476744	0.139535	0.217899	0.136187	0.101167	0.011628	0.317829	0.472868	0.817829	1	0.007752	0.20155	0.468992	0.670543	0.996124	0.003876	0.379845	0.600775	0.825581	0.957364	0.77907	0.096899	0.124031	0.050584	0.042802	0.003891	0.003876	0.271318	0.527132	0.744186	1	0.302326	0.395349	0.686047	0.856589	0.930233	0.01938	0.054264	0.085271	0.333333	0.957364	0.263566	0.311284	0.034884	0.209302	0.48062	0.674419	0.957364	0.5
0.341463	0.341463	0.317073	0.234568	0.197531	0.283951	0.036585	0.353659	0.560976	0.792683	1	0.02439	0.207317	0.341463	0.743902	0.95122	0.012195	0.182927	0.536585	0.682927	0.987805	0.609756	0.170732	0.219512	0.098765	0.049383	0	0.012195	0.195122	0.487805	0.792683	1	0.04878	0.073171	0.341463	0.439024	0.853659	0.207317	0.243902	0.634146	0.682927	0.743902	0.463415	0.345679	0.04878	0.195122	0.402439	0.621951	0.987805	0.5
0.304569	0.385787	0.309645	0.260204	0.178571	0.244898	0.020305	0.375635	0.604061	0.812183	0.984772	0.010152	0.208122	0.426396	0.670051	1	0.005076	0.238579	0.456853	0.705584	0.989848	0.28934	0.106599	0.604061	0.040816	0.112245	0.010204	0.005076	0.208122	0.380711	0.725888	1	0.010152	0.030457	0.538071	0.629442	0.86802	0.076142	0.274112	0.482234	0.781726	0.969543	0.527919	0.408163	0.010152	0.167513	0.456853	0.659898	0.964467	0.451777
0.383598	0.320106	0.296296	0.233422	0.244032	0.201592	0.010582	0.140212	0.436508	0.685185	0.994709	0.005291	0.285714	0.515873	0.724868	0.997354	0.002646	0.301587	0.560847	0.798942	1	0.462963	0.185185	0.351852	0.071618	0.087533	0.007958	0.002646	0.325397	0.537037	0.769841	1	0.177249	0.518519	0.619048	0.756614	0.939153	0.018519	0.119048	0.309524	0.730159	0.992063	0.47619	0.291777	0.02381	0.280423	0.550265	0.785714	0.992063	0.338624
0.146789	0.477064	0.376147	0.117241	0.089655	0.381609	0.004587	0.204128	0.486239	0.692661	0.993119	0.009174	0.256881	0.502294	0.770642	1	0.002294	0.238532	0.511468	0.740826	0.997706	0.190367	0.011468	0.798165	0.004598	0.068966	0.004598	0.002294	0.176606	0.479358	0.669725	1	0.029817	0.029817	0.981651	0.983945	0.988532	0.025229	0.263761	0.516055	0.75	0.963303	0.768349	0.229885	0.025229	0.268349	0.529817	0.756881	0.990826	0.454128
0.383721	0.302326	0.313953	0.247059	0.247059	0.270588	0.046512	0.197674	0.523256	0.744186	0.965116	0.023256	0.232558	0.453488	0.709302	0.988372	0.011628	0.255814	0.418605	0.686047	1	0.372093	0.093023	0.534884	0.047059	0.094118	0	0.011628	0.313953	0.581395	0.802326	1	0.069767	0.081395	0.104651	0.127907	0.837209	0.151163	0.267442	0.453488	0.709302	0.965116	0.44186	0.470588	0.069767	0.255814	0.430233	0.674419	0.976744	0.406977
0.30531	0.367257	0.327434	0.24	0.195556	0.222222	0.00885	0.238938	0.50885	0.761062	0.995575	0.035398	0.243363	0.486726	0.752212	0.982301	0.004425	0.216814	0.482301	0.712389	1	0.380531	0.128319	0.49115	0.057778	0.102222	0.004444	0.004425	0.225664	0.513274	0.756637	1	0.026549	0.053097	0.597345	0.752212	0.924779	0.09292	0.252212	0.438053	0.690265	0.982301	0.575221	0.453333	0.017699	0.230088	0.504425	0.747788	0.986726	0.438053
0.291139	0.35443	0.35443	0.230769	0.205128	0.217949	0.025316	0.316456	0.405063	0.556962	0.987342	0.037975	0.506329	0.64557	0.810127	1	0.012658	0.139241	0.303797	0.658228	0.962025	0.417722	0.151899	0.43038	0.051282	0.051282	0.025641	0.012658	0.531646	0.632911	0.810127	1	0.443038	0.64557	0.683544	0.873418	0.911392	0.025316	0.113924	0.227848	0.329114	0.936709	0.481013	0.410256	0.063291	0.164557	0.455696	0.683544	0.962025	0.468354
0.377778	0.3	0.322222	0.235955	0.213483	0.202247	0.044444	0.211111	0.5	0.755556	0.988889	0.011111	0.222222	0.422222	0.611111	0.977778	0.022222	0.244444	0.511111	0.711111	1	0.711111	0.233333	0.055556	0.134831	0.044944	0	0.011111	0.233333	0.411111	0.744444	1	0.188889	0.488889	0.688889	0.788889	0.855556	0.033333	0.033333	0.044444	0.055556	0.655556	0.344444	0.47191	0.022222	0.277778	0.488889	0.677778	0.955556	0.4
0.247951	0.315574	0.436475	0.131417	0.160164	0.299795	0.004098	0.223361	0.528689	0.764344	0.995902	0.006148	0.254098	0.522541	0.752049	0.997951	0.002049	0.247951	0.44877	0.727459	1	0.260246	0.014344	0.72541	0.010267	0.084189	0.010267	0.002049	0.280738	0.682377	0.846311	1	0.163934	0.163934	0.168033	0.456967	0.741803	0.016393	0.235656	0.463115	0.661885	0.944672	0.665984	0.2423	0.012295	0.243852	0.469262	0.743852	0.959016	0.321721
0.219718	0.321127	0.459155	0.149718	0.149718	0.29096	0.005634	0.225352	0.526761	0.8	0.997183	0.025352	0.264789	0.521127	0.774648	0.994366	0.002817	0.23662	0.473239	0.712676	1	0.295775	0.03662	0.667606	0.014124	0.042373	0.008475	0.002817	0.073239	0.495775	0.923944	1	0.405634	0.498592	0.507042	0.515493	0.822535	0.101408	0.276056	0.476056	0.715493	0.91831	0.695775	0.186441	0.008451	0.261972	0.461972	0.698592	0.921127	0.31831
0.378289	0.3125	0.309211	0.257426	0.214521	0.191419	0.016447	0.243421	0.470395	0.726974	1	0.046053	0.266447	0.555921	0.773026	0.983553	0.003289	0.200658	0.430921	0.720395	0.990132	0.338816	0.226974	0.434211	0.075908	0.082508	0.0033	0.003289	0.207237	0.467105	0.710526	1	0.105263	0.190789	0.503289	0.664474	0.993421	0.029605	0.263158	0.578947	0.825658	0.950658	0.532895	0.343234	0.006579	0.236842	0.486842	0.733553	0.986842	0.309211
0.285016	0.392508	0.322476	0.22186	0.174551	0.261011	0.003257	0.26873	0.57329	0.788274	1	0.004886	0.224756	0.462541	0.71987	0.998371	0.001629	0.2443	0.5	0.741042	0.983713	0.447883	0.167752	0.384365	0.079935	0.073409	0.008157	0.001629	0.23127	0.514658	0.750814	1	0.040717	0.257329	0.464169	0.7443	0.956026	0.045603	0.270358	0.485342	0.763844	0.986971	0.651466	0.300163	0.004886	0.241042	0.488599	0.747557	0.988599	0.416938
0.273632	0.39801	0.328358	0.255	0.165	0.275	0.00995	0.199005	0.522388	0.721393	0.99005	0.014925	0.258706	0.497512	0.781095	0.995025	0.004975	0.223881	0.452736	0.711443	1	0.442786	0.268657	0.288557	0.095	0.055	0.005	0.004975	0.308458	0.572139	0.736318	1	0.024876	0.218905	0.666667	0.766169	0.860697	0.074627	0.189055	0.333333	0.437811	0.965174	0.587065	0.34	0.0199	0.243781	0.497512	0.711443	0.955224	0.412935
0.337349	0.240964	0.421687	0.109756	0.292683	0.280488	0.072289	0.26506	0.493976	0.686747	1	0.036145	0.313253	0.590361	0.73494	0.975904	0.012048	0.156627	0.385542	0.771084	0.987952	0.156627	0.120482	0.722892	0.036585	0.036585	0.012195	0.012048	0.566265	0.60241	0.722892	1	0.53012	0.542169	0.626506	0.650602	0.686747	0.036145	0.204819	0.385542	0.771084	0.951807	0.554217	0.414634	0.036145	0.180723	0.433735	0.771084	0.963855	0.228916
0.228188	0.348993	0.422819	0.144781	0.151515	0.292929	0.040268	0.234899	0.439597	0.805369	0.996644	0.010067	0.278523	0.473154	0.738255	0.993289	0.003356	0.204698	0.533557	0.711409	1	0.348993	0.114094	0.536913	0.043771	0.063973	0.003367	0.003356	0.241611	0.395973	0.771812	1	0.151007	0.174497	0.261745	0.731544	0.788591	0.010067	0.379195	0.560403	0.714765	0.942953	0.587248	0.316498	0.010067	0.251678	0.513423	0.728188	0.986577	0.33557
0.328467	0.357664	0.313869	0.198529	0.198529	0.235294	0.021898	0.233577	0.554745	0.722628	0.978102	0.014599	0.20438	0.408759	0.686131	1	0.007299	0.248175	0.50365	0.781022	0.985401	0.372263	0.328467	0.29927	0.102941	0.029412	0	0.007299	0.20438	0.474453	0.693431	1	0.021898	0.131387	0.518248	0.664234	0.978102	0.270073	0.335766	0.408759	0.751825	0.832117	0.49635	0.455882	0.029197	0.277372	0.416058	0.671533	0.963504	0.423358
0.317869	0.436426	0.245704	0.247849	0.172117	0.177281	0.005155	0.218213	0.448454	0.733677	0.996564	0.003436	0.235395	0.54811	0.768041	1	0.001718	0.273196	0.45189	0.742268	0.991409	0.532646	0.04811	0.419244	0.017212	0.089501	0.003442	0.001718	0.21134	0.527491	0.723368	1	0.046392	0.056701	0.11512	0.158076	0.5	0.080756	0.360825	0.494845	0.769759	0.991409	0.563574	0.337349	0.015464	0.323024	0.589347	0.769759	0.989691	0.448454
0.309859	0.295775	0.394366	0.157143	0.3	0.257143	0.070423	0.225352	0.492958	0.676056	0.887324	0.042254	0.197183	0.478873	0.746479	1	0.014085	0.239437	0.450704	0.704225	0.957746	0.56338	0.295775	0.140845	0.128571	0.042857	0.014286	0.014085	0.211268	0.450704	0.690141	1	0.084507	0.140845	0.56338	0.873239	0.957746	0.323944	0.338028	0.380282	0.408451	0.760563	0.464789	0.371429	0.084507	0.366197	0.56338	0.788732	0.971831	0.309859
0.173684	0.297368	0.528947	0.102902	0.171504	0.335092	0.013158	0.307895	0.555263	0.744737	0.997368	0.005263	0.265789	0.534211	0.776316	0.976316	0.002632	0.218421	0.460526	0.7	1	0.139474	0.057895	0.802632	0.01847	0.050132	0.007916	0.002632	0.392105	0.636842	0.721053	1	0.397368	0.407895	0.723684	0.75	0.765789	0.007895	0.221053	0.473684	0.789474	0.997368	0.715789	0.248021	0.007895	0.231579	0.515789	0.784211	0.992105	0.239474
0.305737	0.427741	0.266521	0.25218	0.176599	0.228924	0.001452	0.272331	0.514887	0.758896	0.997821	0.003631	0.24183	0.485113	0.745824	0.999274	0.000726	0.217865	0.496732	0.743646	1	0.530864	0.384168	0.084967	0.15625	0.015262	0.000727	0.000726	0.256354	0.490922	0.726943	1	0.002905	0.297749	0.557008	0.813362	0.999274	0.007988	0.029049	0.15541	0.487291	0.805374	0.631082	0.366279	0.002905	0.248366	0.517066	0.761801	0.998548	0.447349
0.288889	0.472222	0.238889	0.312849	0.089385	0.251397	0.016667	0.311111	0.511111	0.766667	0.977778	0.011111	0.283333	0.544444	0.794444	1	0.005556	0.161111	0.25	0.633333	0.927778	0.6	0.055556	0.344444	0.022346	0.067039	0.011173	0.005556	0.344444	0.522222	0.783333	1	0.383333	0.722222	0.738889	0.75	0.861111	0.055556	0.161111	0.25	0.594444	0.955556	0.438889	0.24581	0.038889	0.183333	0.405556	0.627778	0.955556	0.477778
0.343612	0.334802	0.321586	0.20354	0.238938	0.221239	0.022026	0.259912	0.546256	0.757709	0.991189	0.008811	0.237885	0.45815	0.735683	0.995595	0.004405	0.22467	0.462555	0.748899	1	0.440529	0.207048	0.352423	0.070796	0.070796	0	0.004405	0.321586	0.546256	0.77533	1	0.022026	0.154185	0.343612	0.69163	0.942731	0.061674	0.202643	0.45815	0.656388	0.995595	0.528634	0.380531	0.017621	0.23348	0.45815	0.696035	0.986784	0.370044
0.368421	0.300752	0.330827	0.249057	0.245283	0.226415	0.007519	0.210526	0.481203	0.710526	1	0.011278	0.270677	0.56015	0.759398	0.996241	0.003759	0.244361	0.469925	0.740602	0.981203	0.424812	0.150376	0.424812	0.05283	0.075472	0	0.003759	0.195489	0.428571	0.661654	1	0.278195	0.379699	0.582707	0.774436	0.932331	0.026316	0.218045	0.507519	0.830827	0.992481	0.530075	0.483019	0.015038	0.274436	0.526316	0.774436	0.981203	0.349624
0.451948	0.296104	0.251948	0.244792	0.239583	0.143229	0.005195	0.27013	0.477922	0.753247	0.997403	0.018182	0.21039	0.566234	0.805195	1	0.002597	0.254545	0.454545	0.667532	0.976623	0.6	0.158442	0.241558	0.098958	0.057292	0.005208	0.002597	0.296104	0.602597	0.831169	1	0.301299	0.514286	0.58961	0.776623	0.971429	0.046753	0.168831	0.251948	0.332468	0.968831	0.415584	0.375	0.012987	0.257143	0.464935	0.672727	0.976623	0.361039
0.277778	0.393519	0.328704	0.204651	0.204651	0.269767	0.009259	0.199074	0.412037	0.75463	0.99537	0.023148	0.333333	0.550926	0.782407	0.981481	0.00463	0.208333	0.467593	0.689815	1	0.393519	0.189815	0.416667	0.07907	0.069767	0.004651	0.00463	0.296296	0.555556	0.722222	1	0.310185	0.375	0.587963	0.671296	0.87037	0.018519	0.143519	0.439815	0.800926	0.944444	0.518519	0.390698	0.018519	0.314815	0.49537	0.75463	0.990741	0.421296
0.392157	0.313725	0.294118	0.16	0.24	0.18	0.039216	0.196078	0.509804	0.627451	0.980392	0.137255	0.235294	0.490196	0.764706	1	0.019608	0.254902	0.411765	0.803922	0.960784	0.333333	0	0.666667	0	0.12	0	0.019608	0.078431	0.156863	0.45098	1	0	0	0	0	0	0.196078	0.333333	0.568627	0.764706	0.941176	0.333333	0.44	0.078431	0.313725	0.470588	0.745098	0.960784	0.372549
0.371601	0.296073	0.332326	0.221212	0.245455	0.172727	0.009063	0.250755	0.543807	0.761329	0.990937	0.006042	0.220544	0.432024	0.673716	0.996979	0.003021	0.247734	0.504532	0.731118	1	0.277946	0.018127	0.703927	0.009091	0.124242	0.009091	0.003021	0.259819	0.507553	0.800604	1	0.39577	0.39577	0.401813	0.404834	0.975831	0.018127	0.238671	0.486405	0.725076	0.957704	0.483384	0.448485	0.012085	0.253776	0.47432	0.722054	0.975831	0.34139
0.331295	0.374108	0.294597	0.228571	0.202041	0.223469	0.003058	0.248726	0.524975	0.784913	0.994903	0.005097	0.244648	0.478084	0.716616	1	0.001019	0.255861	0.504587	0.730887	0.997961	0.559633	0.30581	0.134557	0.10102	0.031633	0.00102	0.001019	0.246687	0.486239	0.740061	1	0.014271	0.186544	0.396534	0.633028	0.929664	0.327217	0.611621	0.779817	0.88685	0.989806	0.508665	0.373469	0.004077	0.265036	0.468909	0.697248	0.997961	0.393476
0.285441	0.381226	0.333333	0.199616	0.199616	0.224568	0.028736	0.295019	0.576628	0.783525	0.984674	0.005747	0.264368	0.536398	0.800766	1	0.001916	0.195402	0.411877	0.618774	0.988506	0.490421	0.130268	0.37931	0.057582	0.065259	0.003839	0.001916	0.258621	0.457854	0.819923	1	0.055556	0.168582	0.239464	0.442529	0.925287	0.01341	0.32567	0.616858	0.720307	0.98659	0.534483	0.360845	0.009579	0.214559	0.385057	0.603448	0.988506	0.388889
0.22	0.415	0.365	0.211055	0.135678	0.291457	0.015	0.18	0.4	0.725	1	0.01	0.17	0.46	0.7	0.99	0.005	0.345	0.565	0.785	0.985	0.36	0.105	0.535	0.035176	0.065327	0.005025	0.005	0.125	0.36	0.75	1	0.375	0.41	0.435	0.775	0.805	0.015	0.29	0.565	0.71	0.945	0.66	0.110553	0.02	0.385	0.575	0.775	0.94	0.44
0.357035	0.305598	0.337368	0.207576	0.25	0.213636	0.003026	0.226929	0.487141	0.733737	0.998487	0.004539	0.223903	0.478064	0.717095	0.993949	0.001513	0.273828	0.518911	0.77761	1	0.314675	0.108926	0.576399	0.042424	0.084848	0.006061	0.001513	0.27534	0.534039	0.738275	1	0.151286	0.29652	0.552194	0.659607	0.785174	0.006051	0.208775	0.467474	0.794251	0.987897	0.529501	0.381818	0.006051	0.304085	0.518911	0.75643	0.995461	0.340393
0.205941	0.358416	0.435644	0.156746	0.184524	0.30754	0.00396	0.243564	0.611881	0.845545	0.990099	0.011881	0.233663	0.439604	0.724752	0.994059	0.00198	0.257426	0.49901	0.708911	1	0.326733	0.134653	0.538614	0.053571	0.061508	0.009921	0.00198	0.316832	0.649505	0.835644	1	0.093069	0.493069	0.772277	0.841584	0.99802	0.00396	0.2	0.386139	0.592079	0.940594	0.792079	0.194444	0.005941	0.223762	0.459406	0.691089	0.992079	0.326733
0.292683	0.385366	0.321951	0.166667	0.20098	0.215686	0.009756	0.326829	0.604878	0.756098	1	0.019512	0.17561	0.414634	0.702439	0.97561	0.004878	0.258537	0.502439	0.770732	0.995122	0.409756	0.239024	0.35122	0.063725	0.093137	0.004902	0.004878	0.243902	0.546341	0.814634	1	0.02439	0.204878	0.273171	0.556098	0.995122	0.019512	0.356098	0.590244	0.721951	0.887805	0.502439	0.401961	0.02439	0.2	0.409756	0.64878	0.995122	0.409756
0.292237	0.3379	0.369863	0.183486	0.197248	0.266055	0.018265	0.328767	0.584475	0.785388	1	0.027397	0.205479	0.392694	0.639269	0.995434	0.004566	0.187215	0.506849	0.767123	0.981735	0.625571	0.196347	0.178082	0.100917	0.036697	0	0.004566	0.260274	0.461187	0.785388	1	0.018265	0.305936	0.639269	0.826484	0.972603	0.077626	0.114155	0.474886	0.56621	0.611872	0.479452	0.330275	0.013699	0.182648	0.520548	0.712329	0.981735	0.360731
0.359155	0.340962	0.299883	0.236054	0.200235	0.204345	0.003521	0.248239	0.504108	0.766432	1	0.001174	0.221244	0.482981	0.724178	0.994131	0.000587	0.286972	0.519366	0.746479	0.999413	0.535798	0.139671	0.324531	0.062243	0.069289	0.004698	0.000587	0.195423	0.454812	0.746479	1	0.003521	0.318075	0.546948	0.780516	0.890845	0.005282	0.335094	0.579812	0.751174	0.998826	0.496479	0.368761	0.002347	0.281103	0.510563	0.725352	0.995892	0.36385
0.127389	0.420382	0.452229	0.076923	0.141026	0.423077	0.031847	0.210191	0.484076	0.757962	0.993631	0.012739	0.292994	0.541401	0.745223	0.987261	0.006369	0.191083	0.43949	0.713376	1	0.184713	0.082803	0.732484	0.019231	0.070513	0.00641	0.006369	0.350318	0.541401	0.738854	1	0.159236	0.171975	0.55414	0.573248	0.598726	0.019108	0.242038	0.452229	0.77707	0.961783	0.840764	0.166667	0.019108	0.254777	0.484076	0.700637	0.968153	0.394904
0.278422	0.331787	0.389791	0.169767	0.230233	0.276744	0.00464	0.234339	0.489559	0.761021	0.99536	0.011601	0.292343	0.538283	0.767981	0.979118	0.00232	0.218097	0.468677	0.726218	1	0.438515	0.257541	0.303944	0.095349	0.072093	0.002326	0.00232	0.294664	0.535963	0.777262	1	0.167053	0.310905	0.475638	0.698376	0.990719	0.009281	0.116009	0.387471	0.74478	0.962877	0.556845	0.409302	0.009281	0.257541	0.468677	0.698376	0.990719	0.357309
0.203125	0.348214	0.448661	0.127517	0.161074	0.346756	0.006696	0.276786	0.564732	0.801339	1	0.013393	0.207589	0.450893	0.680804	0.995536	0.002232	0.270089	0.513393	0.732143	0.997768	0.314732	0.078125	0.607143	0.033557	0.069351	0.002237	0.002232	0.234375	0.546875	0.767857	1	0.241071	0.377232	0.40625	0.850446	0.997768	0.004464	0.207589	0.491071	0.694196	0.977679	0.761161	0.214765	0.004464	0.287946	0.5	0.716518	0.997768	0.345982
0.376376	0.38038	0.243243	0.290581	0.210421	0.184369	0.003003	0.244244	0.453453	0.703704	0.998999	0.002002	0.23023	0.506507	0.750751	0.994995	0.001001	0.291291	0.563564	0.783784	1	0.644645	0.282282	0.073073	0.099198	0.027054	0.001002	0.001001	0.271271	0.504505	0.718719	1	0.067067	0.294294	0.543544	0.828829	0.998999	0.005005	0.024024	0.154154	0.68969	0.961962	0.51952	0.362725	0.004004	0.247247	0.552553	0.776777	0.997998	0.378378
0.355407	0.375524	0.26907	0.271812	0.21896	0.211409	0.016764	0.282481	0.572506	0.789606	1	0.001676	0.243923	0.45767	0.699078	0.996647	0.000838	0.227158	0.463537	0.732607	0.997485	0.524728	0.070411	0.404862	0.035235	0.050336	0	0.000838	0.140821	0.333613	0.477787	1	0.004191	0.209556	0.250629	0.320201	0.531433	0.055323	0.635373	0.752724	0.874267	0.998324	0.398156	0.508389	0.002515	0.230511	0.445096	0.710813	0.997485	0.448449
0.306667	0.386667	0.306667	0.216216	0.162162	0.22973	0.08	0.173333	0.573333	0.733333	0.973333	0.026667	0.226667	0.4	0.68	1	0.013333	0.213333	0.466667	0.746667	0.92	0.306667	0	0.693333	0	0.081081	0	0.013333	0.066667	0.373333	0.653333	1	0	0	0	0	0	0.12	0.28	0.533333	0.746667	0.92	0.493333	0.405405	0.066667	0.293333	0.493333	0.653333	0.92	0.373333
0.2749	0.458167	0.266932	0.28	0.168	0.228	0.007968	0.203187	0.50996	0.74502	0.992032	0.011952	0.23506	0.442231	0.717131	1	0.003984	0.310757	0.545817	0.76494	0.996016	0.589641	0.179283	0.231076	0.088	0.048	0.008	0.003984	0.211155	0.426295	0.729084	1	0.14741	0.486056	0.677291	0.848606	0.992032	0.023904	0.374502	0.458167	0.59761	0.836653	0.50996	0.416	0.027888	0.290837	0.533865	0.784861	0.988048	0.462151
0.292614	0.40625	0.301136	0.267806	0.179487	0.239316	0.011364	0.224432	0.511364	0.772727	1	0.005682	0.241477	0.465909	0.730114	0.994318	0.002841	0.255682	0.505682	0.738636	0.960227	0.394886	0.136364	0.46875	0.059829	0.094017	0.002849	0.002841	0.303977	0.522727	0.786932	1	0.056818	0.176136	0.505682	0.772727	0.880682	0.017045	0.227273	0.460227	0.71875	0.985795	0.545455	0.353276	0.022727	0.289773	0.539773	0.727273	0.940341	0.440341
0.285403	0.392157	0.32244	0.20524	0.196507	0.251092	0.004357	0.217865	0.503268	0.801743	0.997821	0.010893	0.254902	0.448802	0.71024	1	0.002179	0.265795	0.538126	0.755991	0.993464	0.383442	0.165577	0.45098	0.076419	0.076419	0.002183	0.002179	0.172113	0.444444	0.666667	1	0.143791	0.376906	0.514161	0.684096	0.941176	0.015251	0.252723	0.553377	0.793028	0.995643	0.671024	0.30131	0.008715	0.27451	0.518519	0.723312	0.993464	0.40305
0.368852	0.372131	0.259016	0.261084	0.198686	0.192118	0.008197	0.303279	0.504918	0.752459	0.993443	0.003279	0.152459	0.427869	0.731148	0.998361	0.001639	0.331148	0.562295	0.770492	1	0.283607	0	0.716393	0	0.108374	0	0.001639	0.145902	0.360656	0.685246	1	0	0	0	0	0	0.009836	0.311475	0.532787	0.762295	0.986885	0.540984	0.407225	0.009836	0.265574	0.521311	0.740984	0.995082	0.401639
0.373494	0.277108	0.349398	0.207317	0.182927	0.231707	0.301205	0.409639	0.554217	0.710843	0.975904	0.036145	0.13253	0.325301	0.698795	0.963855	0.012048	0.156627	0.277108	0.73494	1	0.289157	0	0.710843	0	0.073171	0	0.012048	0.638554	0.746988	0.927711	1	0	0	0	0	0	0.024096	0.180723	0.361446	0.542169	0.879518	0.277108	0.268293	0.048193	0.289157	0.433735	0.807229	0.927711	0.313253
0.28	0.432	0.288	0.265688	0.17223	0.257677	0.004	0.241333	0.5	0.742667	0.993333	0.002667	0.224	0.489333	0.762667	0.998667	0.001333	0.274667	0.509333	0.725333	1	0.498667	0.077333	0.424	0.026702	0.101469	0.00534	0.001333	0.138667	0.401333	0.650667	1	0.048	0.222667	0.284	0.362667	0.788	0.094667	0.446667	0.682667	0.821333	0.989333	0.497333	0.333778	0.02	0.362667	0.584	0.774667	0.993333	0.456
0.300885	0.424779	0.274336	0.267857	0.1875	0.214286	0.017699	0.238938	0.575221	0.831858	1	0.053097	0.292035	0.442478	0.681416	0.938053	0.00885	0.168142	0.451327	0.787611	0.964602	0.504425	0.345133	0.150442	0.142857	0.053571	0	0.00885	0.238938	0.371681	0.761062	1	0.017699	0.212389	0.486726	0.725664	0.911504	0.150442	0.530973	0.566372	0.60177	0.973451	0.548673	0.428571	0.017699	0.221239	0.442478	0.619469	0.982301	0.380531
0.302469	0.395062	0.302469	0.22291	0.182663	0.22291	0.006173	0.290123	0.484568	0.719136	1	0.009259	0.197531	0.459877	0.743827	0.990741	0.003086	0.231481	0.530864	0.759259	0.981481	0.361111	0.089506	0.549383	0.034056	0.089783	0.003096	0.003086	0.29321	0.567901	0.75	1	0.037037	0.055556	0.237654	0.66358	0.743827	0.033951	0.268519	0.447531	0.780864	0.978395	0.611111	0.365325	0.012346	0.228395	0.509259	0.765432	0.987654	0.447531
0.296053	0.378289	0.325658	0.234323	0.214521	0.224422	0.006579	0.233553	0.513158	0.75	0.983553	0.019737	0.259868	0.5	0.766447	1	0.003289	0.223684	0.476974	0.723684	0.990132	0.417763	0.200658	0.381579	0.09901	0.085809	0.006601	0.003289	0.240132	0.519737	0.730263	1	0.006579	0.118421	0.427632	0.690789	0.993421	0.069079	0.299342	0.529605	0.763158	0.980263	0.631579	0.343234	0.009868	0.266447	0.473684	0.730263	0.986842	0.401316
0.272031	0.402299	0.32567	0.219231	0.207692	0.234615	0.015326	0.241379	0.448276	0.727969	1	0.007663	0.249042	0.586207	0.762452	0.988506	0.003831	0.233716	0.43295	0.693487	0.996169	0.321839	0.153257	0.524904	0.069231	0.115385	0	0.003831	0.252874	0.436782	0.804598	1	0.076628	0.183908	0.383142	0.735632	0.97318	0.011494	0.241379	0.501916	0.693487	0.992337	0.662835	0.330769	0.011494	0.268199	0.54023	0.750958	0.996169	0.429119
0.355263	0.302632	0.342105	0.211082	0.279683	0.197889	0.005263	0.257895	0.55	0.776316	0.997368	0.015789	0.221053	0.397368	0.689474	1	0.002632	0.263158	0.515789	0.752632	0.994737	0.4	0.213158	0.386842	0.079156	0.079156	0.010554	0.002632	0.223684	0.642105	0.876316	1	0.05	0.286842	0.463158	0.786842	0.981579	0.018421	0.244737	0.421053	0.565789	0.976316	0.578947	0.358839	0.007895	0.234211	0.457895	0.655263	0.994737	0.318421
0.355388	0.302457	0.342155	0.1875	0.265152	0.210227	0.011342	0.238185	0.529301	0.765595	1	0.005671	0.277883	0.514178	0.754253	0.994329	0.00189	0.234405	0.459357	0.718336	0.996219	0.453686	0.268431	0.277883	0.073864	0.054924	0.00947	0.00189	0.194707	0.478261	0.703214	1	0.045369	0.402647	0.659735	0.867675	0.982987	0.011342	0.234405	0.361059	0.614367	0.952741	0.493384	0.416667	0.007561	0.274102	0.542533	0.744802	0.990548	0.330813
0.122951	0.401639	0.47541	0.049587	0.132231	0.355372	0.016393	0.221311	0.270492	0.532787	0.97541	0.065574	0.204918	0.459016	0.696721	1	0.008197	0.286885	0.590164	0.778689	0.983607	0.204918	0	0.795082	0	0.066116	0	0.008197	0.237705	0.516393	0.778689	1	0	0	0	0	0	0.016393	0.262295	0.459016	0.696721	0.983607	0.778689	0.165289	0.02459	0.204918	0.47541	0.721311	0.967213	0.368852
0.345806	0.344516	0.309677	0.226098	0.229974	0.231266	0.010323	0.252903	0.523871	0.756129	1	0.002581	0.261935	0.485161	0.740645	0.992258	0.00129	0.230968	0.489032	0.741935	0.99871	0.56	0.178065	0.261935	0.064599	0.072351	0.002584	0.00129	0.218065	0.464516	0.741935	1	0.012903	0.134194	0.567742	0.774194	0.997419	0.055484	0.403871	0.510968	0.747097	0.901935	0.495484	0.338501	0.003871	0.258065	0.508387	0.770323	0.997419	0.388387
0.32732	0.389175	0.283505	0.232558	0.170543	0.209302	0.007732	0.255155	0.579897	0.783505	0.997423	0.005155	0.242268	0.427835	0.646907	1	0.002577	0.229381	0.551546	0.760309	0.994845	0.559278	0.046392	0.39433	0.023256	0.090439	0.002584	0.002577	0.242268	0.42268	0.615979	1	0.100515	0.108247	0.543814	0.564433	0.842784	0.020619	0.275773	0.706186	0.819588	0.979381	0.412371	0.372093	0.010309	0.221649	0.5	0.744845	0.974227	0.425258
0.362963	0.337037	0.3	0.245353	0.193309	0.152416	0.014815	0.251852	0.47037	0.7	0.974074	0.066667	0.244444	0.477778	0.781481	1	0.003704	0.218519	0.537037	0.748148	0.992593	0.577778	0.277778	0.144444	0.085502	0.048327	0.026022	0.003704	0.244444	0.466667	0.755556	1	0.025926	0.192593	0.655556	0.840741	0.974074	0.011111	0.277778	0.411111	0.540741	0.788889	0.422222	0.356877	0.011111	0.218519	0.448148	0.714815	0.992593	0.348148
0.301887	0.399371	0.298742	0.214511	0.195584	0.208202	0.006289	0.232704	0.446541	0.720126	0.974843	0.022013	0.292453	0.477987	0.713836	0.996855	0.003145	0.226415	0.544025	0.801887	1	0.584906	0.160377	0.254717	0.041009	0.072555	0.022082	0.003145	0.185535	0.36478	0.647799	1	0.012579	0.628931	0.836478	0.896226	0.962264	0.034591	0.386792	0.518868	0.691824	0.990566	0.515723	0.321767	0.009434	0.22327	0.600629	0.801887	0.990566	0.418239
0.431818	0.357955	0.210227	0.268571	0.234286	0.137143	0.017045	0.397727	0.551136	0.755682	0.982955	0.011364	0.147727	0.301136	0.602273	1	0.005682	0.215909	0.630682	0.806818	0.994318	0.4375	0.028409	0.534091	0.017143	0.062857	0.017143	0.005682	0.107955	0.272727	0.863636	1	0.210227	0.210227	0.215909	0.221591	0.982955	0.136364	0.448864	0.585227	0.721591	0.988636	0.414773	0.434286	0.028409	0.130682	0.409091	0.704545	0.977273	0.357955
0.349835	0.313531	0.336634	0.165563	0.248344	0.225166	0.009901	0.19802	0.412541	0.709571	1	0.006601	0.316832	0.547855	0.765677	0.980198	0.0033	0.221122	0.50495	0.768977	0.9967	0.392739	0.257426	0.349835	0.092715	0.092715	0.006623	0.0033	0.161716	0.382838	0.683168	1	0.033003	0.237624	0.49835	0.660066	0.980198	0.075908	0.412541	0.594059	0.749175	0.993399	0.557756	0.430464	0.019802	0.250825	0.518152	0.729373	0.993399	0.346535
0.287879	0.400673	0.311448	0.222597	0.161889	0.242833	0.006734	0.304714	0.543771	0.779461	0.994949	0.003367	0.20202	0.446128	0.688552	0.998316	0.001684	0.262626	0.510101	0.776094	1	0.525253	0.20202	0.272727	0.112985	0.072513	0.001686	0.001684	0.228956	0.547138	0.747475	1	0.060606	0.341751	0.449495	0.572391	0.93266	0.003367	0.277778	0.508418	0.801347	0.989899	0.66835	0.310287	0.005051	0.255892	0.513468	0.73064	0.988215	0.393939
0.361111	0.263889	0.375	0.253521	0.225352	0.225352	0.027778	0.152778	0.416667	0.666667	0.972222	0.138889	0.236111	0.5	0.736111	0.986111	0.013889	0.194444	0.472222	0.75	1	0.430556	0.055556	0.513889	0.028169	0.112676	0	0.013889	0.222222	0.388889	0.819444	1	0.305556	0.305556	0.319444	0.333333	0.347222	0.041667	0.152778	0.513889	0.736111	0.902778	0.486111	0.422535	0.083333	0.291667	0.444444	0.694444	0.944444	0.263889
0.349614	0.362468	0.287918	0.224227	0.185567	0.203608	0.005141	0.282776	0.534704	0.77892	1	0.015424	0.246787	0.462725	0.686375	0.992288	0.002571	0.200514	0.478149	0.758355	0.997429	0.401028	0.264781	0.33419	0.090206	0.054124	0.002577	0.002571	0.226221	0.491003	0.77635	1	0.100257	0.51671	0.652956	0.809769	0.938303	0.005141	0.18509	0.362468	0.565553	0.992288	0.550129	0.365979	0.010283	0.213368	0.449871	0.658098	0.992288	0.367609
0.248705	0.432642	0.318653	0.202597	0.163636	0.249351	0.005181	0.256477	0.510363	0.756477	1	0.010363	0.238342	0.487047	0.746114	0.981865	0.002591	0.240933	0.494819	0.733161	0.997409	0.417098	0.300518	0.282383	0.114286	0.062338	0	0.002591	0.297927	0.476684	0.733161	1	0.007772	0.227979	0.474093	0.69171	0.937824	0.028497	0.137306	0.590674	0.797927	0.994819	0.694301	0.311688	0.007772	0.248705	0.481865	0.748705	0.989637	0.479275
0.301455	0.411642	0.286902	0.225	0.16875	0.216667	0.018711	0.199584	0.467775	0.663202	1	0.004158	0.278586	0.567568	0.844075	0.991684	0.002079	0.268191	0.432432	0.696466	0.997921	0.432432	0.149688	0.417879	0.039583	0.064583	0.010417	0.002079	0.197505	0.567568	0.85447	1	0.024948	0.320166	0.386694	0.438669	0.81289	0.010395	0.274428	0.534304	0.675676	0.995842	0.467775	0.3875	0.010395	0.299376	0.490644	0.744283	0.993763	0.43659
0.267241	0.396552	0.336207	0.26087	0.156522	0.347826	0.017241	0.344828	0.603448	0.818966	0.991379	0.025862	0.25	0.431034	0.724138	0.982759	0.008621	0.112069	0.396552	0.681034	1	0.482759	0.474138	0.043103	0.173913	0.017391	0.017391	0.008621	0.232759	0.534483	0.784483	1	0.043103	0.353448	0.5	0.741379	0.956897	0.025862	0.025862	0.034483	0.103448	0.12069	0.5	0.347826	0.025862	0.146552	0.431034	0.706897	0.965517	0.37069
0.268987	0.398734	0.332278	0.206349	0.180952	0.298413	0.028481	0.25	0.39557	0.699367	0.987342	0.006329	0.237342	0.537975	0.765823	1	0.003165	0.256329	0.477848	0.75	0.968354	0.363924	0.234177	0.401899	0.08254	0.057143	0.006349	0.003165	0.300633	0.477848	0.734177	1	0.085443	0.227848	0.553797	0.765823	0.968354	0.022152	0.158228	0.506329	0.683544	0.901899	0.579114	0.349206	0.012658	0.227848	0.493671	0.712025	0.962025	0.424051
0.336538	0.293269	0.370192	0.169082	0.294686	0.236715	0.033654	0.235577	0.519231	0.735577	0.995192	0.014423	0.302885	0.509615	0.711538	0.975962	0.004808	0.192308	0.451923	0.759615	1	0.552885	0.283654	0.163462	0.115942	0.028986	0	0.004808	0.322115	0.519231	0.721154	1	0.254808	0.480769	0.711538	0.836538	0.995192	0.028846	0.0625	0.120192	0.158654	0.216346	0.519231	0.357488	0.019231	0.254808	0.5	0.75	0.990385	0.336538
0.415385	0.292308	0.292308	0.193798	0.271318	0.20155	0.038462	0.269231	0.523077	0.746154	0.976923	0.015385	0.176923	0.453846	0.723077	1	0.007692	0.192308	0.430769	0.676923	0.953846	0.276923	0	0.723077	0	0.108527	0	0.007692	0.407692	0.723077	0.792308	1	0	0	0	0	0	0.015385	0.184615	0.430769	0.623077	0.930769	0.507692	0.403101	0.030769	0.253846	0.430769	0.623077	0.969231	0.307692
0.320248	0.336777	0.342975	0.242236	0.184265	0.236025	0.004132	0.270661	0.514463	0.799587	0.991736	0.006198	0.237603	0.502066	0.727273	1	0.002066	0.231405	0.466942	0.731405	0.997934	0.458678	0.177686	0.363636	0.062112	0.078675	0.008282	0.002066	0.194215	0.539256	0.795455	1	0.061983	0.252066	0.359504	0.533058	0.983471	0.014463	0.280992	0.555785	0.716942	0.942149	0.595041	0.351967	0.020661	0.227273	0.475207	0.721074	0.997934	0.330579
0.23516	0.520548	0.244292	0.21968	0.146453	0.26087	0.015982	0.315068	0.543379	0.762557	0.993151	0.004566	0.223744	0.472603	0.726027	0.997717	0.002283	0.246575	0.479452	0.783105	1	0.515982	0.212329	0.271689	0.06865	0.059497	0	0.002283	0.296804	0.573059	0.755708	1	0.210046	0.374429	0.787671	0.883562	0.997717	0.011416	0.114155	0.326484	0.511416	0.721461	0.589041	0.338673	0.006849	0.253425	0.454338	0.675799	0.995434	0.531963
0.159574	0.351064	0.489362	0.086022	0.172043	0.387097	0.053191	0.180851	0.361702	0.56383	0.989362	0.021277	0.297872	0.478723	0.712766	0.957447	0.010638	0.159574	0.542553	0.744681	1	0.265957	0.021277	0.712766	0	0.086022	0.021505	0.010638	0.308511	0.393617	0.744681	1	0.234043	0.234043	0.234043	0.234043	0.244681	0.031915	0.191489	0.510638	0.691489	0.978723	0.787234	0.172043	0.031915	0.212766	0.531915	0.723404	0.968085	0.297872
0.391304	0.282609	0.326087	0.191257	0.273224	0.202186	0.01087	0.358696	0.554348	0.728261	1	0.027174	0.152174	0.451087	0.804348	0.994565	0.005435	0.201087	0.407609	0.76087	0.98913	0.173913	0.016304	0.809783	0.010929	0.043716	0	0.005435	0.059783	0.103261	0.690217	1	0.043478	0.043478	0.043478	0.048913	0.054348	0.13587	0.336957	0.538043	0.76087	0.978261	0.483696	0.415301	0.021739	0.168478	0.342391	0.701087	0.972826	0.288043
0.370242	0.3391	0.290657	0.274306	0.211806	0.211806	0.00692	0.242215	0.519031	0.809689	0.99654	0.013841	0.287197	0.536332	0.726644	0.989619	0.00346	0.193772	0.422145	0.692042	1	0.647059	0.276817	0.076125	0.121528	0.017361	0.003472	0.00346	0.273356	0.546713	0.775087	1	0.086505	0.280277	0.522491	0.764706	0.955017	0.010381	0.024221	0.044983	0.411765	0.432526	0.550173	0.326389	0.010381	0.224913	0.456747	0.695502	0.955017	0.401384
0.35865	0.345992	0.295359	0.237288	0.254237	0.228814	0.008439	0.223629	0.49789	0.78481	0.995781	0.016878	0.236287	0.434599	0.683544	0.983122	0.004219	0.308017	0.531646	0.738397	1	0.586498	0.109705	0.303797	0.072034	0.088983	0.004237	0.004219	0.219409	0.417722	0.683544	1	0.029536	0.506329	0.57384	0.725738	0.898734	0.046414	0.236287	0.472574	0.85654	0.970464	0.459916	0.491525	0.021097	0.371308	0.578059	0.751055	0.978903	0.341772
0.297468	0.370253	0.332278	0.225397	0.225397	0.212698	0.015823	0.246835	0.474684	0.753165	0.993671	0.006329	0.259494	0.436709	0.696203	0.984177	0.003165	0.227848	0.550633	0.781646	1	0.341772	0.265823	0.392405	0.079365	0.085714	0.003175	0.003165	0.234177	0.449367	0.64557	1	0.072785	0.18038	0.287975	0.408228	0.636076	0.009494	0.572785	0.75	0.876582	0.996835	0.512658	0.495238	0.012658	0.212025	0.512658	0.743671	0.996835	0.367089
0.264865	0.362162	0.372973	0.217391	0.217391	0.288043	0.021622	0.189189	0.524324	0.805405	0.962162	0.016216	0.232432	0.454054	0.72973	1	0.005405	0.264865	0.508108	0.708108	0.989189	0.578378	0.227027	0.194595	0.076087	0.065217	0.032609	0.005405	0.308108	0.475676	0.718919	1	0.016216	0.140541	0.291892	0.572973	0.972973	0.054054	0.302703	0.708108	0.908108	0.983784	0.610811	0.413043	0.016216	0.286486	0.513514	0.702703	0.989189	0.421622
0.393293	0.307927	0.29878	0.238532	0.2263	0.211009	0.009146	0.253049	0.478659	0.737805	0.987805	0.006098	0.20122	0.564024	0.771341	1	0.003049	0.228659	0.5	0.710366	0.993902	0.487805	0.198171	0.314024	0.088685	0.094801	0.009174	0.003049	0.307927	0.533537	0.777439	1	0.015244	0.128049	0.362805	0.631098	0.841463	0.057927	0.195122	0.515244	0.79878	0.990854	0.496951	0.440367	0.015244	0.192073	0.448171	0.655488	0.981707	0.332317
0.320588	0.388235	0.291176	0.212389	0.176991	0.259587	0.005882	0.191176	0.467647	0.691176	0.997059	0.008824	0.329412	0.567647	0.776471	0.994118	0.002941	0.197059	0.435294	0.755882	1	0.464706	0.158824	0.376471	0.091445	0.073746	0.00295	0.002941	0.323529	0.526471	0.752941	1	0.238235	0.676471	0.847059	0.891176	0.997059	0.011765	0.117647	0.282353	0.541176	0.970588	0.573529	0.353982	0.008824	0.261765	0.517647	0.779412	0.991176	0.397059
0.285714	0.397321	0.316964	0.192825	0.210762	0.278027	0.022321	0.227679	0.4375	0.700893	0.995536	0.008929	0.276786	0.549107	0.825893	1	0.004464	0.209821	0.491071	0.696429	0.991071	0.254464	0	0.745536	0	0.107623	0	0.004464	0.111607	0.330357	0.629464	1	0	0	0	0	0	0.017857	0.299107	0.53125	0.772321	0.991071	0.678571	0.349776	0.017857	0.263393	0.566964	0.75	0.991071	0.419643
0.304878	0.365854	0.329268	0.209877	0.17284	0.234568	0.02439	0.317073	0.646341	0.829268	1	0.146341	0.304878	0.45122	0.634146	0.963415	0.012195	0.109756	0.292683	0.695122	0.97561	0.353659	0.060976	0.585366	0.012346	0.135802	0.012346	0.012195	0.280488	0.365854	0.719512	1	0.402439	0.402439	0.414634	0.426829	0.45122	0.02439	0.158537	0.573171	0.780488	0.95122	0.573171	0.37037	0.04878	0.182927	0.402439	0.621951	0.853659	0.390244
0.310734	0.361582	0.327684	0.1875	0.210227	0.272727	0.028249	0.20904	0.474576	0.728814	0.99435	0.016949	0.225989	0.491525	0.734463	1	0.00565	0.254237	0.519774	0.768362	0.988701	0.367232	0.107345	0.525424	0.039773	0.073864	0.005682	0.00565	0.180791	0.502825	0.615819	1	0.045198	0.372881	0.514124	0.632768	0.661017	0.056497	0.231638	0.446328	0.79096	0.966102	0.536723	0.329545	0.011299	0.237288	0.514124	0.774011	0.983051	0.418079
0.279743	0.379421	0.340836	0.196774	0.225806	0.293548	0.009646	0.247588	0.459807	0.765273	1	0.006431	0.215434	0.488746	0.713826	0.993569	0.003215	0.270096	0.530547	0.758842	0.983923	0.421222	0.212219	0.366559	0.122581	0.083871	0.006452	0.003215	0.170418	0.427653	0.684887	1	0.028939	0.176849	0.411576	0.623794	0.864952	0.106109	0.376206	0.59164	0.842444	0.990354	0.607717	0.419355	0.022508	0.247588	0.508039	0.768489	0.983923	0.414791
0.23192	0.44389	0.32419	0.17	0.16	0.29	0.01995	0.316708	0.528678	0.735661	0.992519	0.004988	0.236908	0.478803	0.725686	0.990025	0.002494	0.219451	0.498753	0.775561	1	0.399002	0.15212	0.448878	0.0625	0.0775	0.0025	0.002494	0.311721	0.511222	0.718204	1	0.007481	0.062344	0.326683	0.503741	0.997506	0.0798	0.249377	0.558603	0.780549	0.965087	0.668329	0.3	0.007481	0.23192	0.461347	0.703242	0.995012	0.446384
0.195195	0.540541	0.264264	0.195783	0.093373	0.322289	0.018018	0.327327	0.537538	0.795796	0.996997	0.006006	0.201201	0.444444	0.72973	0.990991	0.003003	0.246246	0.516517	0.744745	1	0.441441	0.126126	0.432432	0.060241	0.084337	0	0.003003	0.168168	0.336336	0.666667	1	0.024024	0.246246	0.414414	0.753754	0.897898	0.093093	0.375375	0.597598	0.798799	0.996997	0.660661	0.36747	0.015015	0.249249	0.489489	0.750751	0.990991	0.582583
0.277056	0.398268	0.324675	0.213043	0.165217	0.317391	0.008658	0.272727	0.5671	0.787879	1	0.021645	0.251082	0.437229	0.714286	0.991342	0.004329	0.199134	0.480519	0.748918	0.982684	0.372294	0.21645	0.411255	0.086957	0.095652	0	0.004329	0.285714	0.597403	0.805195	1	0.008658	0.082251	0.385281	0.541126	0.939394	0.138528	0.294372	0.437229	0.757576	0.978355	0.636364	0.304348	0.012987	0.25974	0.424242	0.662338	0.982684	0.411255
0.315335	0.37149	0.313175	0.222944	0.192641	0.231602	0.017279	0.265659	0.526998	0.723542	0.99784	0.00432	0.24406	0.514039	0.742981	0.99568	0.00216	0.218143	0.470842	0.75378	1	0.485961	0.170626	0.343413	0.056277	0.095238	0	0.00216	0.341253	0.606911	0.809935	1	0.079914	0.302376	0.473002	0.790497	0.889849	0.008639	0.149028	0.397408	0.583153	0.984881	0.565875	0.350649	0.006479	0.269978	0.485961	0.742981	0.987041	0.347732
0.270677	0.451128	0.278195	0.25283	0.162264	0.298113	0.015038	0.428571	0.646617	0.823308	0.996241	0.007519	0.210526	0.424812	0.680451	0.984962	0.003759	0.206767	0.43985	0.718045	1	0.672932	0.12782	0.199248	0.098113	0.060377	0	0.003759	0.210526	0.43985	0.642857	1	0.255639	0.364662	0.616541	0.763158	0.977444	0.078947	0.31203	0.733083	0.842105	0.954887	0.323308	0.513208	0.022556	0.25188	0.481203	0.725564	0.992481	0.432331
0.25	0.380952	0.369048	0.228916	0.168675	0.228916	0.047619	0.166667	0.559524	0.809524	1	0.107143	0.22619	0.488095	0.690476	0.988095	0.011905	0.238095	0.428571	0.714286	0.940476	0.452381	0.190476	0.357143	0.084337	0.060241	0.036145	0.011905	0.178571	0.404762	0.607143	1	0.047619	0.083333	0.428571	0.535714	0.940476	0.190476	0.261905	0.702381	0.821429	0.928571	0.678571	0.289157	0.02381	0.25	0.428571	0.714286	0.940476	0.380952
0.221198	0.366359	0.412442	0.154734	0.154734	0.30254	0.004608	0.251152	0.536866	0.776498	0.997696	0.016129	0.25576	0.474654	0.730415	0.988479	0.002304	0.211982	0.495392	0.723502	1	0.237327	0.006912	0.75576	0.004619	0.096998	0	0.002304	0.239631	0.548387	0.695853	1	0.592166	0.592166	0.592166	0.59447	0.596774	0.004608	0.246544	0.488479	0.75576	0.993088	0.691244	0.244804	0.009217	0.246544	0.456221	0.732719	0.993088	0.331797
0.258242	0.450549	0.291209	0.236915	0.137741	0.258953	0.008242	0.25	0.571429	0.739011	0.989011	0.010989	0.214286	0.472527	0.755495	0.991758	0.002747	0.258242	0.508242	0.730769	1	0.447802	0.206044	0.346154	0.088154	0.071625	0.00551	0.002747	0.307692	0.571429	0.788462	1	0.28022	0.357143	0.497253	0.596154	0.912088	0.016484	0.137363	0.260989	0.722527	0.950549	0.596154	0.297521	0.016484	0.293956	0.505495	0.741758	0.997253	0.480769
0.226087	0.347826	0.426087	0.149123	0.210526	0.359649	0.034783	0.278261	0.478261	0.8	1	0.017391	0.269565	0.530435	0.73913	0.973913	0.008696	0.165217	0.434783	0.686957	0.991304	0.347826	0.052174	0.6	0.008772	0.096491	0.008772	0.008696	0.313043	0.73913	0.826087	1	0.904348	0.904348	0.921739	0.930435	0.947826	0.026087	0.165217	0.391304	0.6	0.895652	0.704348	0.263158	0.026087	0.2	0.53913	0.713043	0.956522	0.286957
0.401114	0.311978	0.286908	0.217877	0.240223	0.189944	0.011142	0.203343	0.476323	0.710306	0.991643	0.005571	0.284123	0.479109	0.743733	0.997214	0.002786	0.295265	0.562674	0.768802	1	0.520891	0.050139	0.428969	0.03352	0.089385	0	0.002786	0.236769	0.467967	0.707521	1	0.261838	0.554318	0.640669	0.791086	0.880223	0.019499	0.214485	0.520891	0.766017	0.963788	0.423398	0.469274	0.008357	0.359331	0.590529	0.760446	0.988858	0.337047
0.314759	0.326807	0.358434	0.177979	0.220211	0.245852	0.006024	0.246988	0.501506	0.756024	0.990964	0.003012	0.222892	0.465361	0.716867	1	0.001506	0.260542	0.50753	0.774096	0.998494	0.521084	0.302711	0.176205	0.117647	0.054299	0.00905	0.001506	0.243976	0.513554	0.728916	1	0.009036	0.162651	0.358434	0.539157	0.993976	0.158133	0.53012	0.75	0.832831	0.963855	0.588855	0.349925	0.00753	0.274096	0.506024	0.736446	0.993976	0.375
0.188679	0.320755	0.490566	0.192308	0.057692	0.346154	0.09434	0.113208	0.54717	0.90566	1	0.037736	0.207547	0.45283	0.716981	0.981132	0.018868	0.245283	0.433962	0.660377	0.849057	0.113208	0	0.886792	0	0.038462	0	0.018868	0.018868	0.943396	0.962264	1	0	0	0	0	0	0.056604	0.245283	0.471698	0.698113	0.924528	0.415094	0.269231	0.150943	0.377358	0.490566	0.716981	0.886792	0.301887
0.340136	0.404762	0.255102	0.282794	0.172061	0.197615	0.003401	0.255102	0.503401	0.743197	1	0.005102	0.207483	0.471088	0.732993	0.996599	0.001701	0.306122	0.52551	0.77381	0.998299	0.619048	0.188776	0.192177	0.064736	0.054514	0.006814	0.001701	0.236395	0.454082	0.722789	1	0.270408	0.591837	0.714286	0.942177	0.998299	0.003401	0.052721	0.357143	0.539116	0.923469	0.426871	0.303237	0.005102	0.318027	0.585034	0.840136	0.998299	0.406463
0.349206	0.222222	0.428571	0.136	0.28	0.224	0.015873	0.285714	0.547619	0.722222	0.97619	0.079365	0.246032	0.404762	0.666667	1	0.007937	0.190476	0.468254	0.777778	0.992063	0.31746	0.15873	0.52381	0.056	0.12	0.008	0.007937	0.301587	0.396825	0.746032	1	0.34127	0.587302	0.626984	0.801587	0.865079	0.055556	0.174603	0.444444	0.698413	0.984127	0.412698	0.4	0.031746	0.214286	0.539683	0.753968	0.984127	0.253968
0.286624	0.420382	0.292994	0.233227	0.15016	0.249201	0.006369	0.33758	0.570064	0.754777	0.996815	0.003185	0.175159	0.394904	0.694268	0.993631	0.076433	0.328025	0.55414	0.783439	1	0.665605	0.273885	0.06051	0.140575	0.019169	0	0.003185	0.200637	0.487261	0.748408	1	0.089172	0.270701	0.429936	0.60828	0.94586	0.286624	0.296178	0.828025	0.875796	0.89172	0.538217	0.345048	0.047771	0.286624	0.509554	0.732484	0.990446	0.449045
0.311018	0.41841	0.270572	0.223464	0.175978	0.219274	0.004184	0.277545	0.517434	0.704324	0.995816	0.002789	0.199442	0.447699	0.771269	1	0.001395	0.292887	0.527197	0.76848	0.991632	0.403068	0.097629	0.499303	0.037709	0.062849	0.001397	0.001395	0.125523	0.361227	0.8159	1	0.013947	0.841004	0.903766	0.947001	0.991632	0.006974	0.309623	0.499303	0.623431	0.803347	0.48954	0.365922	0.006974	0.246862	0.421199	0.786611	0.994421	0.414226
0.402135	0.309609	0.288256	0.289286	0.260714	0.160714	0.014235	0.298932	0.523132	0.754448	0.992883	0.007117	0.209964	0.44484	0.708185	0.985765	0.003559	0.234875	0.483986	0.736655	1	0.437722	0.323843	0.238434	0.103571	0.053571	0.003571	0.003559	0.259786	0.47331	0.786477	1	0.017794	0.238434	0.44484	0.640569	0.88968	0.010676	0.153025	0.530249	0.754448	0.97153	0.569395	0.378571	0.010676	0.256228	0.491103	0.708185	0.978648	0.345196
0.359894	0.320053	0.320053	0.226064	0.236702	0.218085	0.002656	0.310757	0.571049	0.77158	0.997344	0.007968	0.200531	0.410359	0.685259	0.998672	0.001328	0.244356	0.491368	0.755644	1	0.560425	0.193891	0.245684	0.090426	0.050532	0.005319	0.001328	0.2749	0.464807	0.718459	1	0.002656	0.193891	0.512616	0.756972	0.992032	0.023904	0.249668	0.555113	0.837981	0.98672	0.594954	0.353723	0.003984	0.211155	0.459495	0.743692	0.994688	0.34927
0.385428	0.406547	0.208025	0.249471	0.200846	0.118393	0.003168	0.372756	0.540655	0.736008	0.988384	0.002112	0.168955	0.318902	0.684266	0.99472	0.001056	0.411827	0.627244	0.871172	1	0.457233	0.014784	0.527983	0.0074	0.056025	0.005285	0.001056	0.165787	0.312566	0.734952	1	0.212249	0.214361	0.640971	0.888068	0.894403	0.011616	0.409715	0.554382	0.74868	0.998944	0.353749	0.384778	0.01056	0.26188	0.517423	0.778247	0.990496	0.428722
0.277778	0.380208	0.342014	0.198261	0.205217	0.250435	0.003472	0.298611	0.571181	0.777778	0.993056	0.008681	0.194444	0.454861	0.732639	0.998264	0.001736	0.244792	0.484375	0.755208	1	0.440972	0.144097	0.414931	0.064348	0.085217	0.005217	0.001736	0.263889	0.498264	0.734375	1	0.036458	0.177083	0.487847	0.769097	0.984375	0.010417	0.25	0.506944	0.746528	0.982639	0.670139	0.309565	0.006944	0.211806	0.473958	0.737847	0.984375	0.355903
0.294118	0.330629	0.375254	0.199187	0.199187	0.256098	0.010142	0.334686	0.525355	0.768763	0.995943	0.018256	0.21501	0.484787	0.74645	0.997972	0.002028	0.225152	0.462475	0.716024	1	0.421907	0.093306	0.484787	0.04065	0.081301	0	0.002028	0.239351	0.561866	0.819473	1	0.081136	0.160243	0.774848	0.868154	0.993915	0.004057	0.267748	0.472617	0.630832	0.929006	0.628803	0.325203	0.006085	0.237323	0.476673	0.738337	0.989858	0.326572
0.391198	0.290954	0.317848	0.203431	0.240196	0.203431	0.00489	0.210269	0.454768	0.706601	1	0.007335	0.273839	0.525672	0.757946	0.982885	0.002445	0.268949	0.542787	0.779951	0.99511	0.572127	0.136919	0.290954	0.063725	0.068627	0	0.002445	0.234719	0.513447	0.762836	1	0.02934	0.188264	0.400978	0.589242	0.9022	0.04401	0.283619	0.537897	0.867971	0.99511	0.506112	0.343137	0.017115	0.283619	0.498778	0.745721	0.97555	0.310513
0.192308	0.387574	0.420118	0.130564	0.148368	0.296736	0.014793	0.281065	0.497041	0.786982	0.997041	0.008876	0.210059	0.476331	0.745562	0.967456	0.002959	0.269231	0.511834	0.739645	1	0.289941	0.06213	0.647929	0.020772	0.074184	0.008902	0.002959	0.204142	0.431953	0.804734	1	0.109467	0.121302	0.159763	0.183432	0.609467	0.005917	0.360947	0.56213	0.760355	0.991124	0.698225	0.261128	0.011834	0.284024	0.497041	0.707101	0.991124	0.366864
0.203936	0.466905	0.329159	0.200717	0.109319	0.329749	0.007156	0.143113	0.450805	0.68873	1	0.003578	0.216458	0.479428	0.763864	0.998211	0.001789	0.34347	0.525939	0.756708	0.994633	0.386404	0.050089	0.563506	0.021505	0.064516	0.010753	0.001789	0.096601	0.42576	0.620751	1	0.144902	0.300537	0.55814	0.896243	0.994633	0.153846	0.320215	0.536673	0.769231	0.944544	0.690519	0.25448	0.014311	0.304114	0.499106	0.740608	0.991055	0.465116
0.332207	0.328829	0.338964	0.215333	0.213078	0.224352	0.005631	0.251126	0.529279	0.771396	0.996622	0.002252	0.253378	0.48536	0.769144	0.995495	0.001126	0.236486	0.486486	0.702703	1	0.46509	0.04955	0.48536	0.02593	0.093574	0.007892	0.001126	0.283784	0.563063	0.841216	1	0.011261	0.443694	0.61036	0.795045	0.998874	0.033784	0.206081	0.403153	0.670045	0.98536	0.548423	0.365276	0.004505	0.288288	0.512387	0.737613	0.997748	0.342342
0.180328	0.54918	0.270492	0.198347	0.115702	0.322314	0.02459	0.393443	0.614754	0.713115	0.983607	0.016393	0.237705	0.45082	0.745902	1	0.008197	0.163934	0.360656	0.729508	0.991803	0.344262	0	0.655738	0	0.115702	0	0.008197	0.393443	0.721311	0.885246	1	0	0	0	0	0	0.02459	0.180328	0.467213	0.655738	0.983607	0.467213	0.46281	0.040984	0.163934	0.352459	0.647541	0.967213	0.614754
0.412698	0.301587	0.285714	0.209677	0.241935	0.225806	0.031746	0.15873	0.396825	0.587302	0.984127	0.063492	0.269841	0.603175	0.746032	1	0.015873	0.190476	0.492063	0.698413	0.968254	0.587302	0.301587	0.111111	0.129032	0.032258	0	0.015873	0.238095	0.380952	0.571429	1	0.047619	0.095238	0.52381	0.666667	0.968254	0.746032	0.746032	0.777778	0.809524	0.84127	0.396825	0.516129	0.063492	0.206349	0.539683	0.698413	0.968254	0.31746
0.193146	0.361371	0.445483	0.134375	0.140625	0.328125	0.006231	0.327103	0.647975	0.82243	0.993769	0.009346	0.199377	0.442368	0.806854	0.996885	0.003115	0.233645	0.489097	0.700935	1	0.246106	0.015576	0.738318	0.003125	0.065625	0.009375	0.003115	0.05919	0.529595	0.878505	1	0.401869	0.401869	0.507788	0.510903	0.517134	0.068536	0.255452	0.476636	0.722741	0.937695	0.713396	0.1375	0.015576	0.252336	0.461059	0.707165	0.937695	0.373832
0.395604	0.233516	0.370879	0.184573	0.272727	0.203857	0.010989	0.28022	0.464286	0.68956	0.994505	0.008242	0.230769	0.508242	0.774725	1	0.002747	0.197802	0.513736	0.82967	0.997253	0.112637	0.013736	0.873626	0.011019	0.027548	0.00551	0.002747	0.049451	0.771978	0.96978	1	0.027473	0.027473	0.03022	0.057692	0.788462	0.032967	0.269231	0.489011	0.706044	0.964286	0.43956	0.424242	0.013736	0.225275	0.56044	0.851648	0.978022	0.233516
0.296167	0.351916	0.351916	0.198953	0.186736	0.272251	0.012195	0.233449	0.470383	0.729965	1	0.003484	0.226481	0.520906	0.740418	0.998258	0.001742	0.264808	0.508711	0.770035	0.996516	0.381533	0.163763	0.454704	0.073298	0.062827	0.00349	0.001742	0.369338	0.614983	0.773519	1	0.092334	0.517422	0.608014	0.749129	0.827526	0.003484	0.181185	0.332753	0.493031	0.958188	0.52439	0.373473	0.006969	0.240418	0.454704	0.684669	0.996516	0.369338
0.29932	0.348639	0.352041	0.172061	0.199319	0.25724	0.003401	0.207483	0.440476	0.719388	0.998299	0.010204	0.285714	0.554422	0.753401	0.988095	0.001701	0.234694	0.479592	0.755102	1	0.462585	0.243197	0.294218	0.103918	0.052811	0.001704	0.001701	0.418367	0.612245	0.795918	1	0.006803	0.544218	0.685374	0.833333	0.996599	0.017007	0.14966	0.239796	0.341837	0.993197	0.591837	0.374787	0.005102	0.265306	0.557823	0.77551	0.994898	0.370748
0.323442	0.403561	0.272997	0.321429	0.169643	0.22619	0.005935	0.305638	0.501484	0.735905	1	0.023739	0.249258	0.48368	0.74184	0.997033	0.002967	0.186944	0.510386	0.765579	0.994065	0.436202	0.124629	0.439169	0.053571	0.071429	0	0.002967	0.31454	0.4273	0.72997	1	0.071217	0.142433	0.302671	0.744807	0.908012	0.005935	0.243323	0.590504	0.78635	0.994065	0.480712	0.386905	0.011869	0.192878	0.52819	0.750742	0.994065	0.388724
0.219178	0.497717	0.283105	0.206422	0.142202	0.275229	0.022831	0.210046	0.493151	0.776256	0.995434	0.009132	0.30137	0.511416	0.73516	1	0.004566	0.178082	0.47032	0.712329	0.986301	0.410959	0.164384	0.424658	0.059633	0.077982	0.004587	0.004566	0.200913	0.369863	0.6621	1	0.050228	0.164384	0.292237	0.525114	0.808219	0.018265	0.447489	0.611872	0.849315	0.972603	0.6621	0.348624	0.018265	0.251142	0.488584	0.712329	0.968037	0.520548
0.311759	0.371923	0.316317	0.208029	0.195255	0.255474	0.004558	0.262534	0.509572	0.752963	0.998177	0.002735	0.244303	0.502279	0.76299	0.999088	0.000912	0.233364	0.476755	0.714676	1	0.57794	0.296263	0.125798	0.093978	0.031934	0.006387	0.000912	0.227894	0.524157	0.785779	1	0.044667	0.291705	0.44485	0.608022	0.979034	0.004558	0.099362	0.556974	0.842297	0.998177	0.519599	0.321168	0.005469	0.237922	0.476755	0.703737	0.996354	0.408387
0.144068	0.322034	0.533898	0.059829	0.179487	0.316239	0.025424	0.220339	0.347458	0.694915	0.872881	0.084746	0.271186	0.601695	0.754237	0.983051	0.008475	0.211864	0.466102	0.728814	1	0.211864	0.025424	0.762712	0	0.102564	0.034188	0.008475	0.279661	0.508475	0.610169	1	0.330508	0.330508	0.330508	0.542373	0.550847	0.016949	0.194915	0.449153	0.788136	0.983051	0.762712	0.205128	0.016949	0.20339	0.449153	0.661017	0.974576	0.330508
0.150943	0.314465	0.534591	0.107595	0.14557	0.360759	0.044025	0.207547	0.553459	0.792453	0.993711	0.012579	0.220126	0.471698	0.710692	0.968553	0.006289	0.257862	0.477987	0.742138	1	0.138365	0.050314	0.811321	0.031646	0.031646	0.006329	0.006289	0.371069	0.805031	0.924528	1	0.811321	0.81761	0.962264	0.974843	0.987421	0.025157	0.220126	0.440252	0.641509	0.893082	0.767296	0.227848	0.018868	0.220126	0.490566	0.742138	0.974843	0.314465
0.295749	0.34658	0.357671	0.172988	0.213691	0.256244	0.003697	0.256007	0.479667	0.759704	0.999076	0.001848	0.225508	0.494455	0.74122	0.997227	0.000924	0.261553	0.516636	0.749538	1	0.336414	0.069316	0.59427	0.026827	0.086031	0.004625	0.000924	0.184843	0.392791	0.639556	1	0.013863	0.195009	0.400185	0.652495	0.985213	0.023105	0.304991	0.550832	0.773567	0.995379	0.551756	0.407031	0.007394	0.283734	0.512015	0.733826	0.998152	0.341035
0.28266	0.391924	0.325416	0.221429	0.183333	0.235714	0.028504	0.301663	0.567696	0.767221	0.997625	0.004751	0.209026	0.47981	0.733967	0.992874	0.002375	0.239905	0.456057	0.71734	1	0.470309	0.256532	0.273159	0.12381	0.07619	0.004762	0.002375	0.211401	0.508314	0.767221	1	0.047506	0.28266	0.496437	0.691211	0.976247	0.030879	0.299287	0.427553	0.760095	0.952494	0.536817	0.390476	0.007126	0.258907	0.47981	0.745843	0.983373	0.36342
0.236234	0.463588	0.300178	0.211744	0.129893	0.281139	0.007105	0.207815	0.435169	0.699822	0.998224	0.003552	0.284192	0.529307	0.769094	1	0.001776	0.216696	0.488455	0.738899	0.996448	0.559503	0.168739	0.271758	0.078292	0.053381	0	0.001776	0.284192	0.522202	0.772647	1	0.063943	0.246892	0.484902	0.689165	0.978686	0.005329	0.174067	0.436945	0.753108	0.994671	0.690941	0.274021	0.005329	0.307282	0.575488	0.792185	0.996448	0.447602
0.146893	0.457627	0.39548	0.135977	0.107649	0.405099	0.016949	0.299435	0.539548	0.725989	0.983051	0.00565	0.20339	0.485876	0.740113	1	0.002825	0.259887	0.502825	0.774011	0.99435	0.257062	0.028249	0.714689	0.008499	0.087819	0.002833	0.002825	0.19774	0.460452	0.742938	1	0.39548	0.398305	0.40678	0.573446	0.581921	0.050847	0.259887	0.502825	0.774011	0.988701	0.731638	0.232295	0.008475	0.259887	0.488701	0.69774	0.991525	0.446328
0.275087	0.408304	0.316609	0.2513	0.169844	0.272097	0.031142	0.294118	0.517301	0.742215	1	0.00346	0.230104	0.480969	0.726644	0.99827	0.00173	0.211073	0.487889	0.785467	0.991349	0.49827	0.361592	0.140138	0.142114	0.041594	0	0.00173	0.301038	0.539792	0.740484	1	0.051903	0.224913	0.474048	0.686851	0.951557	0.00519	0.038062	0.366782	0.858131	0.989619	0.622837	0.322357	0.00692	0.231834	0.49481	0.782007	0.989619	0.377163
0.309524	0.321429	0.369048	0.192771	0.228916	0.216867	0.107143	0.297619	0.5	0.690476	1	0.02381	0.190476	0.404762	0.630952	0.97619	0.011905	0.166667	0.52381	0.797619	0.964286	0.511905	0.357143	0.130952	0.13253	0.060241	0.012048	0.011905	0.238095	0.488095	0.738095	1	0.035714	0.107143	0.547619	0.797619	0.952381	0.309524	0.321429	0.357143	0.702381	0.964286	0.666667	0.289157	0.035714	0.190476	0.535714	0.797619	0.964286	0.321429
0.37037	0.296296	0.333333	0.186567	0.216418	0.246269	0.014815	0.17037	0.348148	0.711111	0.985185	0.022222	0.311111	0.637037	0.807407	0.992593	0.007407	0.303704	0.503704	0.696296	1	0.481481	0.237037	0.281481	0.104478	0.044776	0.014925	0.007407	0.318519	0.562963	0.82963	1	0.207407	0.259259	0.577778	0.8	0.911111	0.02963	0.103704	0.177778	0.481481	0.725926	0.511111	0.38806	0.037037	0.37037	0.555556	0.777778	0.97037	0.333333
0.417281	0.3098	0.272919	0.251055	0.219409	0.177215	0.003161	0.210748	0.384615	0.680717	0.997893	0.002107	0.256059	0.55216	0.75764	0.998946	0.001054	0.361433	0.579557	0.792413	1	0.449947	0.187566	0.362487	0.064346	0.074895	0.003165	0.001054	0.184405	0.398314	0.685985	1	0.036881	0.551106	0.702845	0.906217	0.996839	0.004215	0.217071	0.420443	0.751317	0.965227	0.3804	0.303797	0.007376	0.487882	0.642782	0.822972	0.990516	0.33509
0.326582	0.362025	0.311392	0.258883	0.215736	0.22335	0.005063	0.232911	0.475949	0.751899	1	0.007595	0.189873	0.437975	0.711392	0.994937	0.002532	0.331646	0.564557	0.78481	0.989873	0.587342	0.126582	0.286076	0.055838	0.076142	0	0.002532	0.16962	0.387342	0.691139	1	0.086076	0.4	0.501266	0.708861	0.987342	0.217722	0.435443	0.622785	0.774684	0.951899	0.468354	0.340102	0.01519	0.341772	0.549367	0.767089	0.989873	0.367089
0.160237	0.362018	0.477745	0.107143	0.127976	0.369048	0.005935	0.178042	0.522255	0.709199	1	0.008902	0.237389	0.480712	0.765579	0.991098	0.002967	0.25816	0.489614	0.724036	0.994065	0.216617	0.026706	0.756677	0.008929	0.080357	0.002976	0.002967	0.145401	0.430267	0.68546	1	0.166172	0.169139	0.175074	0.284866	0.293769	0.014837	0.302671	0.522255	0.762611	0.979228	0.774481	0.172619	0.020772	0.287834	0.507418	0.762611	0.973294	0.364985
0.393258	0.235955	0.370787	0.163842	0.327684	0.163842	0.016854	0.219101	0.511236	0.764045	1	0.022472	0.230337	0.477528	0.719101	0.994382	0.005618	0.264045	0.483146	0.702247	0.983146	0.235955	0.140449	0.623596	0.050847	0.096045	0.00565	0.005618	0.219101	0.393258	0.752809	1	0.601124	0.629213	0.786517	0.848315	0.898876	0.02809	0.191011	0.426966	0.679775	0.983146	0.47191	0.474576	0.022472	0.264045	0.5	0.724719	0.983146	0.252809
0.214106	0.345088	0.440806	0.123737	0.141414	0.295455	0.007557	0.282116	0.586902	0.788413	1	0.032746	0.269521	0.503778	0.685139	0.982368	0.002519	0.216625	0.443325	0.735516	0.989924	0.274559	0.030227	0.695214	0.022727	0.073232	0.002525	0.002519	0.254408	0.589421	0.780856	1	0.261965	0.267003	0.282116	0.879093	0.987406	0.02267	0.216625	0.473552	0.740554	0.964736	0.730479	0.176768	0.017632	0.234257	0.473552	0.725441	0.969773	0.314861
0.296192	0.438646	0.265162	0.213277	0.15678	0.228814	0.005642	0.283498	0.480959	0.723554	0.99859	0.002821	0.200282	0.449929	0.758815	1	0.00141	0.327221	0.550071	0.736248	0.991537	0.622003	0.040903	0.337094	0.024011	0.080508	0.001412	0.00141	0.200282	0.375176	0.695346	1	0.009873	0.03244	0.052186	0.825106	0.908322	0.102962	0.513399	0.627645	0.77292	0.933709	0.425952	0.324859	0.007052	0.448519	0.610719	0.764457	0.991537	0.480959
0.352705	0.350701	0.296593	0.246988	0.230924	0.210843	0.006012	0.236473	0.466934	0.699399	0.991984	0.01002	0.256513	0.51503	0.783567	0.997996	0.002004	0.248497	0.523046	0.751503	1	0.322645	0.092184	0.58517	0.032129	0.088353	0.008032	0.002004	0.208417	0.527054	0.739479	1	0.172345	0.296593	0.677355	0.721443	0.951904	0.014028	0.256513	0.466934	0.777555	0.991984	0.563126	0.413655	0.01002	0.234469	0.49499	0.725451	0.981964	0.336673
0.359223	0.432039	0.208738	0.297561	0.112195	0.195122	0.014563	0.194175	0.398058	0.558252	0.980583	0.009709	0.38835	0.621359	0.776699	1	0.004854	0.140777	0.286408	0.694175	0.941748	0.553398	0.092233	0.354369	0.04878	0.068293	0.019512	0.004854	0.383495	0.582524	0.839806	1	0.043689	0.058252	0.276699	0.786408	0.864078	0.07767	0.203883	0.339806	0.601942	0.694175	0.38835	0.292683	0.043689	0.223301	0.626214	0.723301	0.951456	0.451456
0.330893	0.358712	0.310395	0.230205	0.209677	0.217009	0.010249	0.229868	0.510981	0.775988	0.997072	0.002928	0.295754	0.50366	0.732064	1	0.001464	0.234261	0.462665	0.746706	0.998536	0.556369	0.15959	0.284041	0.064516	0.067449	0.008798	0.001464	0.29429	0.550512	0.692533	1	0.064422	0.158126	0.718887	0.786237	0.95022	0.055637	0.225476	0.399707	0.827233	0.991215	0.489019	0.322581	0.002928	0.247438	0.486091	0.783309	0.989751	0.363104
0.263158	0.462406	0.274436	0.218868	0.143396	0.290566	0.011278	0.199248	0.398496	0.609023	0.996241	0.026316	0.293233	0.571429	0.763158	1	0.003759	0.218045	0.458647	0.718045	0.984962	0.548872	0.161654	0.289474	0.056604	0.064151	0.003774	0.003759	0.255639	0.586466	0.827068	1	0.169173	0.229323	0.447368	0.718045	0.928571	0.011278	0.142857	0.402256	0.571429	0.917293	0.62782	0.415094	0.018797	0.285714	0.56015	0.789474	0.984962	0.492481
0.188088	0.376176	0.435737	0.154088	0.119497	0.336478	0.009404	0.210031	0.426332	0.717868	1	0.043887	0.278997	0.520376	0.761755	0.984326	0.003135	0.22884	0.476489	0.758621	0.996865	0.210031	0.009404	0.780564	0.006289	0.075472	0.006289	0.003135	0.23511	0.498433	0.670846	1	0.818182	0.818182	0.818182	0.990596	0.99373	0.00627	0.278997	0.489028	0.752351	0.974922	0.774295	0.245283	0.00627	0.282132	0.498433	0.758621	0.990596	0.347962
0.294355	0.372984	0.332661	0.220202	0.20202	0.252525	0.004032	0.308468	0.53629	0.752016	1	0.014113	0.21371	0.461694	0.731855	0.997984	0.002016	0.217742	0.46371	0.747984	0.995968	0.393145	0.084677	0.522177	0.044444	0.092929	0	0.002016	0.247984	0.606855	0.842742	1	0.08871	0.159274	0.766129	0.796371	0.989919	0.006048	0.266129	0.439516	0.620968	0.921371	0.631048	0.331313	0.006048	0.245968	0.485887	0.743952	0.989919	0.356855
0.272926	0.421397	0.305677	0.231947	0.179431	0.286652	0.008734	0.251092	0.582969	0.786026	0.995633	0.004367	0.233624	0.475983	0.748908	1	0.002183	0.262009	0.469432	0.68559	0.989083	0.473799	0.203057	0.323144	0.074398	0.065646	0.008753	0.002183	0.209607	0.473799	0.764192	1	0.030568	0.227074	0.401747	0.534934	0.899563	0.017467	0.338428	0.598253	0.840611	0.960699	0.641921	0.315098	0.010917	0.277293	0.462882	0.716157	0.989083	0.449782
0.289809	0.38535	0.324841	0.239617	0.178914	0.252396	0.006369	0.22293	0.464968	0.710191	1	0.012739	0.27707	0.519108	0.738854	0.987261	0.003185	0.235669	0.493631	0.745223	0.996815	0.353503	0.133758	0.512739	0.047923	0.079872	0.003195	0.003185	0.248408	0.401274	0.56051	1	0.006369	0.10828	0.264331	0.417197	0.665605	0.041401	0.324841	0.697452	0.828025	0.968153	0.66879	0.345048	0.009554	0.273885	0.535032	0.770701	0.996815	0.382166
0.329099	0.381125	0.289776	0.250605	0.20339	0.23063	0.00121	0.240774	0.483364	0.748336	0.999395	0.004235	0.268603	0.510587	0.741682	1	0.000605	0.23654	0.500907	0.751966	0.99879	0.499093	0.334543	0.166364	0.109564	0.034504	0.000605	0.000605	0.22928	0.46219	0.699335	1	0.040532	0.245009	0.411978	0.628554	0.99879	0.001815	0.709619	0.77072	0.837871	0.992136	0.513007	0.38862	0.00242	0.258318	0.540835	0.767695	0.998185	0.411373
0.324963	0.398818	0.276219	0.260355	0.164201	0.198225	0.002954	0.254062	0.496307	0.771049	1	0.004431	0.252585	0.469719	0.700148	0.998523	0.001477	0.227474	0.57164	0.751846	0.997046	0.530281	0.091581	0.378139	0.042899	0.096154	0.004438	0.001477	0.268833	0.440177	0.629247	1	0.011817	0.206795	0.508124	0.688331	0.836041	0.019202	0.177253	0.667651	0.856721	0.994092	0.447563	0.408284	0.013294	0.221566	0.592319	0.77548	0.994092	0.440177
0.230548	0.400576	0.368876	0.190751	0.138728	0.280347	0.014409	0.305476	0.550432	0.806916	0.997118	0.005764	0.262248	0.585014	0.832853	1	0.002882	0.195965	0.414986	0.590778	0.945245	0.524496	0.04611	0.429395	0.026012	0.066474	0.00289	0.002882	0.282421	0.67147	0.841499	1	0.291066	0.314121	0.325648	0.792507	0.948127	0.014409	0.184438	0.458213	0.582133	0.92219	0.634006	0.265896	0.008646	0.207493	0.466859	0.659942	0.979827	0.409222
0.264706	0.425134	0.31016	0.254692	0.187668	0.260054	0.008021	0.229947	0.5	0.737968	1	0.013369	0.245989	0.486631	0.735294	0.997326	0.002674	0.240642	0.505348	0.780749	0.989305	0.449198	0.278075	0.272727	0.096515	0.069705	0.005362	0.002674	0.243316	0.40107	0.71123	1	0.082888	0.181818	0.417112	0.727273	0.994652	0.010695	0.475936	0.617647	0.759358	0.962567	0.647059	0.359249	0.005348	0.254011	0.505348	0.724599	0.994652	0.427807
0.431579	0.326316	0.242105	0.340426	0.191489	0.12766	0.021053	0.252632	0.578947	0.747368	0.978947	0.031579	0.2	0.431579	0.789474	0.968421	0.010526	0.210526	0.410526	0.663158	1	0.357895	0.031579	0.610526	0.021277	0.085106	0	0.010526	0.389474	0.789474	0.873684	1	0.968421	0.968421	0.968421	0.978947	0.989474	0.063158	0.2	0.368421	0.610526	0.768421	0.368421	0.510638	0.063158	0.210526	0.410526	0.631579	0.968421	0.357895
0.383333	0.254762	0.361905	0.188544	0.243437	0.207637	0.011905	0.314286	0.5	0.747619	1	0.004762	0.185714	0.502381	0.754762	0.997619	0.002381	0.240476	0.492857	0.735714	0.988095	0.392857	0.271429	0.335714	0.081146	0.062053	0.01432	0.002381	0.252381	0.480952	0.802381	1	0.17619	0.509524	0.607143	0.752381	0.985714	0.011905	0.154762	0.285714	0.67619	0.890476	0.554762	0.405728	0.009524	0.216667	0.5	0.785714	0.992857	0.3
0.298674	0.344033	0.357292	0.203911	0.204609	0.25	0.001396	0.309142	0.535939	0.779484	1	0.006281	0.242847	0.491975	0.714585	0.995115	0.000698	0.219121	0.46127	0.764131	0.997906	0.418004	0.268667	0.313329	0.107542	0.047486	0.002793	0.000698	0.311235	0.542219	0.734822	1	0.014655	0.30635	0.665736	0.801117	0.93859	0.001396	0.205862	0.358688	0.56455	0.998604	0.547802	0.420391	0.002094	0.228193	0.469644	0.741103	0.995115	0.376832
0.284173	0.359712	0.356115	0.184116	0.187726	0.285199	0.010791	0.255396	0.489209	0.81295	1	0.007194	0.23741	0.521583	0.723022	0.992806	0.003597	0.226619	0.478417	0.701439	0.989209	0.399281	0.133094	0.467626	0.050542	0.093863	0	0.003597	0.230216	0.521583	0.773381	1	0.028777	0.129496	0.316547	0.492806	0.859712	0.064748	0.28777	0.543165	0.751799	0.985612	0.636691	0.361011	0.014388	0.28777	0.503597	0.68705	0.989209	0.399281
0.290679	0.518167	0.191153	0.243671	0.113924	0.189873	0.007899	0.203791	0.413902	0.661927	0.99842	0.00316	0.345972	0.578199	0.78673	0.995261	0.00158	0.129542	0.349131	0.682464	1	0.774092	0.058452	0.167457	0.023734	0.030063	0.007911	0.00158	0.369668	0.563981	0.756714	1	0.06793	0.094787	0.118483	0.151659	0.876777	0.009479	0.050553	0.203791	0.875197	0.973144	0.225908	0.208861	0.006319	0.104265	0.21643	0.853081	0.990521	0.526066
0.276364	0.465455	0.258182	0.233577	0.149635	0.255474	0.007273	0.232727	0.461818	0.687273	1	0.014545	0.247273	0.527273	0.749091	0.974545	0.003636	0.254545	0.465455	0.8	0.996364	0.898182	0.101818	0	0.080292	0	0	0.003636	0.258182	0.498182	0.738182	1	0.036364	0.08	0.389091	0.898182	0.989091	0	0	0	0	0	0.501818	0.248175	0.025455	0.258182	0.512727	0.792727	0.996364	0.429091
0.336538	0.298077	0.365385	0.252427	0.252427	0.165049	0.028846	0.269231	0.509615	0.740385	0.990385	0.086538	0.211538	0.490385	0.701923	1	0.009615	0.221154	0.423077	0.711538	0.951923	0.355769	0.365385	0.278846	0.087379	0.029126	0.029126	0.009615	0.173077	0.355769	0.759615	1	0.038462	0.115385	0.423077	0.817308	0.961538	0.278846	0.5	0.567308	0.653846	0.730769	0.548077	0.446602	0.038462	0.240385	0.451923	0.673077	0.971154	0.278846
0.18711	0.413721	0.399168	0.164583	0.127083	0.354167	0.006237	0.174636	0.388773	0.621622	0.995842	0.004158	0.259875	0.503119	0.783784	1	0.002079	0.295218	0.548857	0.748441	0.997921	0.255717	0.054054	0.690229	0.020833	0.083333	0.004167	0.002079	0.189189	0.459459	0.827443	1	0.060291	0.070686	0.120582	0.139293	0.814969	0.006237	0.297297	0.54262	0.727651	0.983368	0.742204	0.158333	0.010395	0.351351	0.575884	0.787942	0.987526	0.424116
0.333333	0.363636	0.30303	0.214286	0.183673	0.27551	0.030303	0.414141	0.616162	0.777778	1	0.060606	0.252525	0.434343	0.767677	0.989899	0.010101	0.10101	0.333333	0.585859	0.909091	0.464646	0.141414	0.393939	0.061224	0.061224	0	0.010101	0.262626	0.424242	0.59596	1	0.131313	0.151515	0.333333	0.535354	0.575758	0.020202	0.10101	0.727273	0.828283	0.929293	0.484848	0.387755	0.040404	0.151515	0.333333	0.585859	0.89899	0.40404
0.317073	0.341463	0.341463	0.232653	0.212245	0.22449	0.00813	0.272358	0.53252	0.764228	1	0.036585	0.247967	0.48374	0.747967	0.99187	0.004065	0.215447	0.479675	0.723577	0.98374	0.601626	0.166667	0.231707	0.073469	0.057143	0	0.004065	0.276423	0.495935	0.756098	1	0.065041	0.256098	0.394309	0.691057	0.890244	0.012195	0.231707	0.536585	0.670732	0.98374	0.439024	0.408163	0.012195	0.211382	0.471545	0.719512	0.98374	0.47561
0.334211	0.372368	0.293421	0.229249	0.216074	0.237154	0.003947	0.240789	0.498684	0.748684	0.997368	0.002632	0.244737	0.490789	0.782895	0.998684	0.001316	0.253947	0.5	0.721053	1	0.406579	0.126316	0.467105	0.069829	0.090909	0.003953	0.001316	0.219737	0.485526	0.780263	1	0.096053	0.490789	0.602632	0.789474	0.996053	0.007895	0.251316	0.411842	0.701316	0.989474	0.694737	0.310935	0.010526	0.289474	0.511842	0.742105	0.996053	0.385526
0.268097	0.367292	0.364611	0.198925	0.209677	0.276882	0.018767	0.262735	0.525469	0.785523	0.986595	0.005362	0.235925	0.466488	0.689008	1	0.002681	0.254692	0.512064	0.75067	0.994638	0.522788	0.268097	0.209115	0.104839	0.040323	0.002688	0.002681	0.155496	0.434316	0.672922	1	0.013405	0.289544	0.546917	0.723861	0.994638	0.168901	0.38874	0.624665	0.836461	0.965147	0.587131	0.424731	0.010724	0.262735	0.49866	0.723861	0.994638	0.396783
0.384615	0.324786	0.290598	0.224839	0.226981	0.203426	0.004274	0.211538	0.5	0.771368	1	0.00641	0.241453	0.514957	0.737179	0.967949	0.002137	0.303419	0.49359	0.717949	0.995726	0.57265	0.130342	0.297009	0.051392	0.06424	0.008565	0.002137	0.175214	0.536325	0.775641	1	0.027778	0.25641	0.350427	0.472222	0.972222	0.008547	0.403846	0.608974	0.758547	0.989316	0.395299	0.299786	0.008547	0.352564	0.510684	0.660256	0.987179	0.344017
0.270506	0.376963	0.352531	0.215035	0.157343	0.236014	0.005236	0.212914	0.450262	0.736475	1	0.00349	0.267016	0.551483	0.832461	0.994764	0.001745	0.265271	0.495637	0.663176	0.99651	0.38918	0.041885	0.568935	0.024476	0.076923	0	0.001745	0.233857	0.542757	0.883072	1	0.21466	0.267016	0.376963	0.635253	0.968586	0.024433	0.282723	0.486911	0.682373	0.989529	0.565445	0.293706	0.017452	0.282723	0.511344	0.692845	0.99651	0.34555
0.297082	0.3687	0.334218	0.191489	0.18617	0.236702	0.01061	0.246684	0.469496	0.761273	0.997347	0.005305	0.198939	0.493369	0.708223	1	0.002653	0.29443	0.519894	0.748011	0.986737	0.437666	0.27321	0.289125	0.095745	0.069149	0	0.002653	0.177719	0.480106	0.724138	1	0.055703	0.262599	0.554377	0.875332	0.98939	0.034483	0.275862	0.450928	0.665782	0.779841	0.66313	0.292553	0.007958	0.281167	0.527851	0.758621	0.98939	0.3687
0.288671	0.399782	0.311547	0.224646	0.173391	0.270447	0.009804	0.227669	0.502179	0.727669	1	0.003268	0.253813	0.477124	0.747277	0.998911	0.001089	0.24183	0.514161	0.748366	0.996732	0.513072	0.180828	0.3061	0.070883	0.051254	0.007634	0.001089	0.171024	0.397603	0.712418	1	0.021786	0.211329	0.330065	0.444444	0.794118	0.009804	0.521786	0.705882	0.848584	0.994553	0.622004	0.322792	0.004357	0.269063	0.527233	0.745098	0.996732	0.417211
0.30719	0.405229	0.287582	0.256579	0.190789	0.243421	0.084967	0.248366	0.542484	0.712418	0.986928	0.013072	0.169935	0.418301	0.69281	0.980392	0.006536	0.30719	0.575163	0.79085	1	0.699346	0.248366	0.052288	0.105263	0.039474	0	0.006536	0.189542	0.411765	0.620915	1	0.254902	0.640523	0.823529	0.901961	0.993464	0.117647	0.124183	0.535948	0.588235	0.601307	0.45098	0.407895	0.039216	0.261438	0.424837	0.712418	0.980392	0.418301
0.302347	0.395307	0.302347	0.211382	0.163505	0.229449	0.001805	0.366426	0.610108	0.851083	1	0.009025	0.210289	0.425993	0.681408	0.991877	0.000903	0.205776	0.471119	0.723827	0.999097	0.518051	0.039711	0.442238	0.020777	0.067751	0.006323	0.000903	0.298736	0.477437	0.685018	1	0.035199	0.302347	0.624549	0.768953	0.990072	0.004513	0.186823	0.536101	0.786101	0.998195	0.546931	0.325203	0.011733	0.211191	0.487365	0.727437	0.98917	0.435921
0.276762	0.472585	0.250653	0.235602	0.115183	0.217277	0.010444	0.248042	0.402089	0.67624	0.989556	0.002611	0.24282	0.509138	0.754569	0.997389	0.020888	0.224543	0.548303	0.772846	1	0.592689	0.37859	0.028721	0.133508	0.018325	0.002618	0.002611	0.276762	0.469974	0.751958	1	0.023499	0.214099	0.522193	0.75718	0.968668	0.112272	0.114883	0.464752	0.624021	0.738903	0.396867	0.366492	0.015666	0.258486	0.509138	0.765013	0.971279	0.475196
0.297071	0.376569	0.32636	0.184874	0.197479	0.226891	0.012552	0.301255	0.535565	0.728033	1	0.046025	0.246862	0.497908	0.740586	0.991632	0.004184	0.150628	0.41841	0.76569	0.995816	0.514644	0.284519	0.200837	0.117647	0.033613	0	0.004184	0.380753	0.60251	0.761506	1	0.259414	0.405858	0.556485	0.807531	0.991632	0.008368	0.079498	0.129707	0.179916	0.966527	0.577406	0.319328	0.008368	0.267782	0.560669	0.761506	0.995816	0.405858
0.309783	0.358696	0.331522	0.218579	0.174863	0.256831	0.016304	0.25	0.554348	0.842391	0.994565	0.01087	0.304348	0.494565	0.755435	1	0.005435	0.201087	0.451087	0.63587	0.956522	0.483696	0.380435	0.13587	0.196721	0.010929	0	0.005435	0.13587	0.391304	0.657609	1	0.103261	0.244565	0.5	0.61413	0.815217	0.842391	0.869565	0.902174	0.934783	0.972826	0.630435	0.306011	0.01087	0.244565	0.48913	0.673913	0.956522	0.38587
0.420561	0.336449	0.242991	0.254717	0.169811	0.216981	0.028037	0.401869	0.598131	0.757009	1	0.018692	0.158879	0.35514	0.672897	0.981308	0.009346	0.140187	0.364486	0.663551	0.953271	0.299065	0.074766	0.626168	0.037736	0.075472	0	0.009346	0.514019	0.64486	0.850467	1	0.869159	0.878505	0.897196	0.953271	0.971963	0.028037	0.168224	0.327103	0.607477	0.803738	0.373832	0.377358	0.065421	0.149533	0.252336	0.551402	0.953271	0.317757
0.352147	0.341104	0.306748	0.19656	0.184275	0.219902	0.009816	0.206135	0.474847	0.820859	0.995092	0.004908	0.228221	0.489571	0.705521	1	0.001227	0.276074	0.512883	0.731288	0.998773	0.468712	0.068712	0.462577	0.029484	0.081081	0.004914	0.001227	0.161963	0.537423	0.792638	1	0.089571	0.477301	0.618405	0.690798	0.990184	0.028221	0.282209	0.455215	0.744785	0.96319	0.559509	0.356265	0.013497	0.263804	0.495706	0.703067	0.990184	0.397546
0.266881	0.421222	0.311897	0.241935	0.167742	0.248387	0.009646	0.228296	0.620579	0.845659	1	0.006431	0.22508	0.421222	0.623794	0.990354	0.003215	0.263666	0.559486	0.765273	0.987138	0.411576	0.18328	0.405145	0.067742	0.067742	0.003226	0.003215	0.189711	0.369775	0.678457	1	0.115756	0.26045	0.659164	0.826367	0.932476	0.051447	0.327974	0.501608	0.707395	0.987138	0.559486	0.4	0.012862	0.22508	0.491961	0.710611	0.990354	0.40836
0.191682	0.401447	0.406872	0.139493	0.115942	0.353261	0.016275	0.296564	0.564195	0.810127	1	0.003617	0.242315	0.482821	0.737794	0.998192	0.001808	0.240506	0.488246	0.728752	0.985533	0.305606	0.023508	0.670886	0.01087	0.083333	0	0.001808	0.287523	0.499096	0.851718	1	0.0217	0.025316	0.94575	0.951175	0.983725	0.005425	0.233273	0.479204	0.707052	0.994575	0.739602	0.184783	0.003617	0.244123	0.475588	0.707052	0.98915	0.423146
0.33853	0.287305	0.374165	0.167224	0.276477	0.243032	0.011136	0.227171	0.47216	0.750557	0.995546	0.002227	0.266147	0.530067	0.755011	0.998886	0.001114	0.253898	0.506682	0.741648	1	0.458797	0.132517	0.408686	0.056856	0.081382	0.003344	0.001114	0.359688	0.614699	0.815145	1	0.003341	0.319599	0.606904	0.797327	0.98441	0.012249	0.126949	0.355234	0.532294	0.96882	0.494432	0.423634	0.003341	0.267261	0.497773	0.713808	0.997773	0.316258
0.331723	0.355878	0.312399	0.225806	0.208065	0.232258	0.006441	0.256039	0.504026	0.732689	1	0.003221	0.223833	0.499195	0.78744	0.99839	0.00161	0.259259	0.489533	0.724638	0.993559	0.470209	0.169082	0.360709	0.074194	0.074194	0	0.00161	0.26087	0.495974	0.769726	1	0.030596	0.241546	0.523349	0.718196	0.937198	0.008052	0.217391	0.452496	0.745572	0.990338	0.582931	0.380645	0.025765	0.251208	0.536232	0.776167	0.993559	0.375201
0.319366	0.361268	0.319366	0.22449	0.171202	0.260771	0.003398	0.210646	0.431484	0.702152	1	0.002265	0.249151	0.516421	0.762174	0.997735	0.001133	0.285391	0.539071	0.755379	0.99547	0.325028	0.053228	0.621744	0.021542	0.103175	0.001134	0.001133	0.257078	0.502831	0.804077	1	0.141563	0.428086	0.911665	0.935447	0.989807	0.00453	0.238958	0.473386	0.685164	0.98188	0.639864	0.30839	0.007928	0.311438	0.546999	0.778029	0.99547	0.375991
0.327778	0.361111	0.311111	0.26257	0.206704	0.206704	0.022222	0.177778	0.466667	0.722222	0.994444	0.011111	0.216667	0.472222	0.7	0.972222	0.005556	0.311111	0.538889	0.788889	1	0.488889	0.483333	0.027778	0.150838	0.005587	0.005587	0.005556	0.166667	0.477778	0.727778	1	0.083333	0.327778	0.555556	0.788889	0.994444	0.283333	0.283333	0.288889	0.294444	0.305556	0.477778	0.324022	0.083333	0.3	0.494444	0.772222	0.983333	0.377778
0.154605	0.404605	0.440789	0.105611	0.128713	0.363036	0.026316	0.190789	0.578947	0.756579	1	0.006579	0.269737	0.463816	0.753289	0.990132	0.003289	0.226974	0.493421	0.730263	0.983553	0.230263	0	0.769737	0	0.079208	0	0.003289	0.055921	0.269737	0.789474	1	0	0	0	0	0	0.059211	0.3125	0.532895	0.740132	0.993421	0.697368	0.171617	0.029605	0.338816	0.546053	0.753289	0.986842	0.378289
0.30814	0.375	0.31686	0.247813	0.195335	0.209913	0.014535	0.287791	0.52907	0.770349	0.994186	0.017442	0.218023	0.494186	0.715116	1	0.002907	0.238372	0.473837	0.732558	0.982558	0.430233	0.238372	0.331395	0.090379	0.084548	0.014577	0.002907	0.281977	0.543605	0.790698	1	0.005814	0.229651	0.584302	0.80814	0.976744	0.026163	0.142442	0.450581	0.636628	0.991279	0.65407	0.332362	0.005814	0.267442	0.473837	0.715116	0.985465	0.398256
0.377863	0.446565	0.175573	0.264368	0.137931	0.172414	0.038168	0.270992	0.522901	0.729008	1	0.007634	0.20229	0.496183	0.78626	0.996183	0.003817	0.251908	0.446565	0.675573	0.98855	0.541985	0.045802	0.412214	0.019157	0.072797	0.003831	0.003817	0.183206	0.465649	0.801527	1	0.469466	0.477099	0.48855	0.835878	0.885496	0.076336	0.354962	0.599237	0.725191	0.973282	0.225191	0.252874	0.030534	0.301527	0.396947	0.652672	0.977099	0.477099
0.306542	0.37757	0.315888	0.213483	0.205993	0.220974	0.018692	0.259813	0.484112	0.723364	0.992523	0.003738	0.233645	0.502804	0.781308	0.998131	0.001869	0.242991	0.514019	0.715888	1	0.336449	0.142056	0.521495	0.058052	0.073034	0.001873	0.001869	0.229907	0.465421	0.708411	1	0.016822	0.401869	0.540187	0.669159	0.895327	0.005607	0.233645	0.51028	0.788785	0.975701	0.583178	0.385768	0.013084	0.237383	0.540187	0.760748	0.97757	0.409346
0.354201	0.326194	0.319605	0.240924	0.232673	0.214521	0.004942	0.247117	0.530478	0.734761	1	0.014827	0.271829	0.495881	0.762768	0.995058	0.001647	0.23229	0.476112	0.728171	0.975288	0.443163	0.273476	0.283361	0.10231	0.056106	0.0033	0.001647	0.283361	0.487644	0.757825	1	0.011532	0.359143	0.507414	0.726524	0.955519	0.003295	0.14168	0.545305	0.749588	0.99341	0.570016	0.366337	0.008237	0.2257	0.474465	0.731466	0.975288	0.377265
0.1875	0.375	0.4375	0.164557	0.151899	0.392405	0.025	0.0875	0.25	0.5375	1	0.05	0.225	0.45	0.7375	0.9375	0.0125	0.3	0.5625	0.7875	0.9875	0.15	0	0.85	0	0.075949	0	0.0125	0.0375	0.0875	0.125	1	0	0	0	0	0	0.0625	0.3375	0.5625	0.775	0.9875	0.7125	0.253165	0.0375	0.3625	0.5625	0.75	0.95	0.275
0.262295	0.44877	0.288934	0.24846	0.162218	0.256674	0.016393	0.256148	0.510246	0.776639	0.993852	0.004098	0.206967	0.485656	0.717213	0.995902	0.002049	0.266393	0.502049	0.762295	1	0.594262	0.209016	0.196721	0.090349	0.045175	0.008214	0.002049	0.303279	0.538934	0.770492	1	0.196721	0.397541	0.678279	0.819672	0.954918	0.008197	0.092213	0.194672	0.442623	0.897541	0.528689	0.320329	0.008197	0.266393	0.454918	0.711066	0.983607	0.461066
0.35124	0.376033	0.272727	0.267081	0.20911	0.213251	0.006198	0.260331	0.485537	0.75	0.997934	0.004132	0.225207	0.487603	0.71281	0.979339	0.002066	0.264463	0.520661	0.783058	1	0.597107	0.183884	0.219008	0.070393	0.05383	0.012422	0.002066	0.225207	0.518595	0.737603	1	0.07438	0.433884	0.609504	0.791322	0.997934	0.010331	0.18595	0.336777	0.747934	0.981405	0.634298	0.289855	0.014463	0.258264	0.504132	0.745868	0.995868	0.440083
0.404651	0.269767	0.325581	0.214953	0.299065	0.196262	0.009302	0.255814	0.47907	0.734884	0.981395	0.027907	0.186047	0.493023	0.725581	0.990698	0.004651	0.209302	0.511628	0.75814	1	0.530233	0.297674	0.172093	0.102804	0.037383	0.009346	0.004651	0.218605	0.483721	0.72093	1	0.046512	0.172093	0.437209	0.632558	0.846512	0.2	0.381395	0.753488	0.925581	0.972093	0.451163	0.401869	0.023256	0.246512	0.493023	0.72093	0.976744	0.297674
0.269231	0.353846	0.376923	0.204633	0.135135	0.320463	0.026923	0.215385	0.680769	0.823077	0.973077	0.007692	0.192308	0.403846	0.676923	0.996154	0.003846	0.315385	0.496154	0.665385	1	0.430769	0.1	0.469231	0.034749	0.073359	0.019305	0.003846	0.126923	0.234615	0.565385	1	0.042308	0.323077	0.503846	0.526923	0.957692	0.026923	0.415385	0.638462	0.757692	0.984615	0.569231	0.27027	0.030769	0.315385	0.5	0.657692	0.988462	0.407692
0.276812	0.428986	0.294203	0.208999	0.174165	0.275762	0.005797	0.214493	0.417391	0.63913	0.992754	0.002899	0.272464	0.584058	0.791304	0.998551	0.001449	0.253623	0.489855	0.72029	1	0.33913	0.071014	0.589855	0.026125	0.063861	0	0.001449	0.573913	0.681159	0.807246	1	0.011594	0.608696	0.857971	0.955072	0.995652	0.024638	0.178261	0.362319	0.521739	0.924638	0.673913	0.351234	0.004348	0.289855	0.563768	0.776812	0.997101	0.444928
0.411565	0.363946	0.22449	0.255973	0.174061	0.143345	0.020408	0.292517	0.578231	0.785714	0.982993	0.006803	0.217687	0.42517	0.765306	1	0.003401	0.231293	0.411565	0.605442	0.911565	0.384354	0.030612	0.585034	0.017065	0.064846	0.003413	0.003401	0.14966	0.360544	0.506803	1	0.163265	0.166667	0.326531	0.333333	0.989796	0.088435	0.29932	0.612245	0.758503	0.931973	0.29932	0.341297	0.102041	0.255102	0.455782	0.622449	0.986395	0.387755
0.376712	0.332192	0.291096	0.237113	0.247423	0.195876	0.010274	0.273973	0.544521	0.794521	1	0.006849	0.232877	0.472603	0.657534	0.993151	0.003425	0.239726	0.486301	0.746575	0.986301	0.452055	0.256849	0.291096	0.072165	0.085911	0.003436	0.003425	0.126712	0.410959	0.657534	1	0.047945	0.243151	0.523973	0.664384	0.989726	0.044521	0.366438	0.719178	0.811644	0.89726	0.476027	0.522337	0.020548	0.311644	0.561644	0.760274	0.986301	0.363014
0.307692	0.386588	0.30572	0.227273	0.219368	0.221344	0.00789	0.262327	0.481262	0.763314	0.998028	0.003945	0.252465	0.524655	0.747535	1	0.001972	0.22288	0.4714	0.725838	0.994083	0.512821	0.392505	0.094675	0.114625	0.023715	0	0.001972	0.311637	0.568047	0.838264	1	0.055227	0.307692	0.5286	0.678501	0.982249	0.005917	0.027613	0.071006	0.16568	0.865878	0.506903	0.438735	0.005917	0.240631	0.483235	0.715976	0.994083	0.424063
0.387283	0.352601	0.260116	0.226744	0.232558	0.203488	0.017341	0.32948	0.566474	0.768786	1	0.023121	0.16185	0.445087	0.786127	0.971098	0.00578	0.236994	0.462428	0.635838	0.976879	0.300578	0	0.699422	0	0.104651	0	0.00578	0.242775	0.606936	0.716763	1	0	0	0	0	0	0.034682	0.254335	0.485549	0.745665	0.947977	0.387283	0.453488	0.034682	0.231214	0.404624	0.693642	0.976879	0.369942
0.355769	0.351923	0.292308	0.248555	0.2158	0.194605	0.003846	0.246154	0.486538	0.780769	1	0.017308	0.282692	0.559615	0.753846	0.996154	0.001923	0.236538	0.440385	0.688462	0.936538	0.432692	0.178846	0.388462	0.067437	0.071291	0.001927	0.001923	0.248077	0.561538	0.817308	1	0.053846	0.351923	0.45	0.65	0.940385	0.003846	0.209615	0.486538	0.711538	0.994231	0.603846	0.327553	0.007692	0.288462	0.513462	0.701923	0.955769	0.371154
0.281752	0.506569	0.211679	0.194444	0.181287	0.179825	0.005839	0.354745	0.49927	0.655474	1	0.00292	0.178102	0.563504	0.849635	0.99708	0.00146	0.261314	0.440876	0.617518	0.99854	0.49927	0.089051	0.411679	0.04386	0.032164	0	0.00146	0.166423	0.522628	0.865693	1	0.007299	0.065693	0.248175	0.763504	0.99562	0.268613	0.394161	0.49781	0.632117	0.743066	0.632117	0.347953	0.005839	0.179562	0.474453	0.79708	0.99562	0.524088
0.223333	0.396667	0.38	0.180602	0.147157	0.307692	0.006667	0.286667	0.596667	0.803333	0.996667	0.01	0.223333	0.426667	0.696667	0.99	0.003333	0.213333	0.463333	0.73	1	0.233333	0.073333	0.693333	0.026756	0.053512	0	0.003333	0.363333	0.746667	0.916667	1	0.766667	0.786667	0.82	0.836667	0.946667	0.01	0.18	0.416667	0.616667	0.976667	0.693333	0.234114	0.03	0.21	0.446667	0.65	0.95	0.383333
0.171958	0.330688	0.497354	0.090186	0.151194	0.387268	0.015873	0.28836	0.539683	0.809524	1	0.007937	0.240741	0.497354	0.722222	0.992063	0.002646	0.248677	0.468254	0.740741	0.997354	0.187831	0.063492	0.748677	0.013263	0.061008	0.007958	0.002646	0.164021	0.378307	0.719577	1	0.005291	0.219577	0.396825	0.801587	0.81746	0.02381	0.275132	0.518519	0.740741	0.997354	0.761905	0.249337	0.010582	0.253968	0.473545	0.746032	0.997354	0.272487
0.301818	0.385455	0.312727	0.20438	0.178832	0.277372	0.025455	0.261818	0.578182	0.803636	1	0.007273	0.229091	0.450909	0.734545	0.996364	0.003636	0.218182	0.461818	0.712727	0.949091	0.367273	0.134545	0.498182	0.080292	0.094891	0	0.003636	0.214545	0.530909	0.694545	1	0.072727	0.185455	0.458182	0.636364	0.843636	0.021818	0.269091	0.487273	0.803636	0.974545	0.585455	0.372263	0.021818	0.236364	0.469091	0.709091	0.974545	0.407273
[truncated: 439 more rows]
[truncated: 83 more columns]
