# Supplementary material for: Prediction of RNA‐Binding Proteins by Voting Systems
Source: Hindawi journal article supplement (doi:10.1155/2011/506205), 2011-01-01
Supplement: f1 [file 506205.f1.zip › testSet7.csv]

v1	v2	v3	v4	v5	v6	v7	v8	v9	v10	v11	v12	v13	v14	v15	v16	v17	v18	v19	v20	v21	v22	v23	v24	v25	v26	v27	v28	v29	v30	v31	v32	v33	v34	v35	v36	v37	v38	v39	v40	v41	v42	v43	v44	v45	v46	v47	v48	v49	v50
0.32964	0.454294	0.216066	0.302778	0.144444	0.169444	0.00554	0.310249	0.556787	0.770083	1	0.019391	0.210526	0.421053	0.731302	0.99723	0.00277	0.32687	0.520776	0.725762	0.99446	0.66759	0.091413	0.240997	0.05	0.061111	0.011111	0.00277	0.229917	0.493075	0.750693	1	0.33241	0.470914	0.506925	0.725762	0.99169	0.00831	0.171745	0.457064	0.795014	0.98892	0.34626	0.35	0.022161	0.246537	0.498615	0.714681	0.99446	0.468144
0.432432	0.256757	0.310811	0.191781	0.246575	0.150685	0.040541	0.27027	0.554054	0.72973	0.945946	0.027027	0.148649	0.391892	0.837838	1	0.013514	0.175676	0.472973	0.608108	0.851351	0.351351	0.27027	0.378378	0.082192	0.054795	0	0.013514	0.27027	0.716216	0.905405	1	0.310811	0.608108	0.675676	0.810811	0.878378	0.067568	0.148649	0.243243	0.459459	0.554054	0.418919	0.356164	0.054054	0.162162	0.418919	0.608108	0.878378	0.27027
0.243816	0.498233	0.257951	0.216312	0.131206	0.262411	0.007067	0.212014	0.342756	0.650177	0.975265	0.010601	0.289753	0.54417	0.756184	1	0.003534	0.226148	0.508834	0.763251	0.992933	0.798587	0.120141	0.081272	0.056738	0.021277	0	0.003534	0.332155	0.55477	0.759717	1	0.120141	0.219081	0.279152	0.611307	0.992933	0.162544	0.176678	0.293286	0.314488	0.904594	0.572438	0.297872	0.021201	0.318021	0.55477	0.713781	0.992933	0.44523
0.35	0.377273	0.272727	0.242792	0.197269	0.212443	0.00303	0.233333	0.424242	0.739394	0.99697	0.006061	0.254545	0.574242	0.806061	0.995455	0.001515	0.20303	0.457576	0.674242	1	0.472727	0.127273	0.4	0.047041	0.08346	0.007587	0.001515	0.29697	0.607576	0.842424	1	0.036364	0.128788	0.345455	0.654545	0.990909	0.010606	0.263636	0.436364	0.625758	0.989394	0.509091	0.358118	0.004545	0.215152	0.475758	0.681818	0.993939	0.390909
0.38833	0.327968	0.283702	0.274194	0.191532	0.197581	0.006036	0.217304	0.440644	0.696177	1	0.004024	0.245473	0.515091	0.746479	0.993964	0.002012	0.31992	0.561368	0.790744	0.991952	0.468813	0.092555	0.438632	0.042339	0.094758	0.006048	0.002012	0.158954	0.368209	0.661972	1	0.070423	0.593561	0.762575	0.889336	0.969819	0.004024	0.32998	0.535211	0.750503	0.991952	0.38833	0.342742	0.016097	0.484909	0.657948	0.841046	0.991952	0.358149
0.340426	0.357447	0.302128	0.264957	0.205128	0.24359	0.012766	0.26383	0.468085	0.761702	0.991489	0.008511	0.221277	0.519149	0.744681	1	0.004255	0.187234	0.523404	0.731915	0.995745	0.404255	0.097872	0.497872	0.029915	0.089744	0.021368	0.004255	0.238298	0.370213	0.676596	1	0.017021	0.178723	0.310638	0.689362	0.714894	0.080851	0.391489	0.53617	0.817021	0.974468	0.544681	0.410256	0.017021	0.280851	0.523404	0.697872	0.995745	0.370213
0.368421	0.359649	0.27193	0.20354	0.230088	0.20354	0.026316	0.254386	0.491228	0.807018	1	0.017544	0.219298	0.429825	0.622807	0.95614	0.008772	0.166667	0.587719	0.798246	0.964912	0.359649	0.27193	0.368421	0.106195	0.070796	0.017699	0.008772	0.175439	0.464912	0.763158	1	0.04386	0.105263	0.394737	0.578947	0.850877	0.184211	0.263158	0.666667	0.780702	0.95614	0.429825	0.389381	0.052632	0.236842	0.473684	0.666667	0.938596	0.315789
0.388383	0.369021	0.242597	0.287343	0.191562	0.173318	0.004556	0.323462	0.595672	0.816629	0.998861	0.002278	0.224374	0.473804	0.722096	0.994305	0.001139	0.214123	0.411162	0.646925	1	0.501139	0.120729	0.378132	0.051311	0.085519	0.003421	0.001139	0.214123	0.550114	0.790433	1	0.045558	0.258542	0.41344	0.657175	0.867882	0.059226	0.266515	0.472665	0.675399	0.98861	0.403189	0.330673	0.004556	0.222096	0.414579	0.6082	0.980638	0.405467
0.37931	0.287931	0.332759	0.207254	0.253886	0.217617	0.005172	0.248276	0.482759	0.739655	1	0.003448	0.231034	0.546552	0.782759	0.998276	0.001724	0.258621	0.47069	0.722414	0.975862	0.422414	0.377586	0.2	0.1019	0.053541	0.018998	0.001724	0.284483	0.563793	0.782759	1	0.034483	0.263793	0.493103	0.72069	0.941379	0.043103	0.2	0.360345	0.658621	0.967241	0.439655	0.390328	0.012069	0.265517	0.489655	0.724138	0.948276	0.315517
0.299383	0.37037	0.330247	0.210526	0.213622	0.216718	0.012346	0.283951	0.512346	0.762346	1	0.006173	0.20679	0.478395	0.728395	0.987654	0.003086	0.256173	0.453704	0.746914	0.993827	0.444444	0.216049	0.339506	0.065015	0.058824	0.003096	0.003086	0.169753	0.435185	0.651235	1	0.012346	0.231481	0.447531	0.759259	0.938272	0.021605	0.395062	0.589506	0.82716	0.975309	0.540123	0.334365	0.009259	0.262346	0.490741	0.737654	0.987654	0.361111
0.384058	0.34058	0.275362	0.255474	0.211679	0.19708	0.036232	0.23913	0.514493	0.789855	0.992754	0.014493	0.231884	0.463768	0.681159	0.978261	0.007246	0.217391	0.456522	0.652174	1	0.391304	0.195652	0.413043	0.072993	0.072993	0	0.007246	0.181159	0.413043	0.688406	1	0.144928	0.326087	0.376812	0.586957	0.65942	0.014493	0.275362	0.557971	0.789855	0.942029	0.355072	0.350365	0.021739	0.253623	0.442029	0.637681	0.971014	0.318841
0.34143	0.438596	0.219973	0.268919	0.154054	0.195946	0.005398	0.225371	0.445344	0.748988	1	0.002699	0.261808	0.550607	0.774629	0.99865	0.00135	0.249663	0.418354	0.665317	0.983806	0.775978	0.087719	0.136302	0.051351	0.043243	0.005405	0.00135	0.249663	0.560054	0.796221	1	0.010796	0.265857	0.368421	0.483131	0.883941	0.021592	0.237517	0.34413	0.59919	0.960864	0.360324	0.32973	0.009447	0.249663	0.431849	0.574899	0.974359	0.45614
0.491018	0.293413	0.215569	0.301205	0.186747	0.144578	0.011976	0.323353	0.616766	0.820359	1	0.053892	0.185629	0.437126	0.652695	0.994012	0.005988	0.143713	0.329341	0.526946	0.928144	0.45509	0.185629	0.359281	0.072289	0.084337	0	0.005988	0.353293	0.532934	0.694611	1	0.143713	0.293413	0.341317	0.473054	0.682635	0.017964	0.215569	0.736527	0.826347	0.976048	0.281437	0.313253	0.023952	0.155689	0.323353	0.491018	0.928144	0.281437
0.286401	0.412088	0.301511	0.234364	0.172509	0.245361	0.001374	0.261676	0.476648	0.728709	0.991071	0.002747	0.233516	0.524038	0.761676	0.999313	0.000687	0.255495	0.503434	0.75206	1	0.570055	0.348901	0.081044	0.119588	0.024742	0.006873	0.000687	0.252747	0.485577	0.71978	1	0.008929	0.247253	0.510989	0.762363	0.995192	0.041896	0.181319	0.399038	0.93544	0.989011	0.60783	0.290034	0.00206	0.265797	0.527473	0.765797	0.998626	0.441621
0.356265	0.298526	0.345209	0.204182	0.254613	0.236162	0.002457	0.283784	0.540541	0.760442	1	0.004914	0.237101	0.455774	0.732187	0.995086	0.001229	0.22973	0.495086	0.735872	0.997543	0.465602	0.248157	0.286241	0.098401	0.059041	0.00246	0.001229	0.210074	0.469287	0.749386	1	0.038084	0.202703	0.423833	0.793612	0.997543	0.006143	0.318182	0.556511	0.707617	0.9914	0.563882	0.398524	0.003686	0.271499	0.484029	0.743243	0.997543	0.332924
0.388158	0.302632	0.309211	0.225166	0.284768	0.211921	0.013158	0.269737	0.447368	0.717105	1	0.039474	0.217105	0.519737	0.710526	0.967105	0.006579	0.223684	0.513158	0.789474	0.986842	0.375	0.296053	0.328947	0.119205	0.05298	0.013245	0.006579	0.197368	0.559211	0.743421	1	0.013158	0.184211	0.631579	0.881579	0.980263	0.157895	0.296053	0.381579	0.460526	0.809211	0.401316	0.503311	0.019737	0.197368	0.513158	0.723684	0.986842	0.263158
0.318627	0.352941	0.328431	0.206135	0.225767	0.24908	0.002451	0.254902	0.498775	0.729167	0.998775	0.004902	0.245098	0.503676	0.778186	1	0.001225	0.240196	0.493873	0.734069	0.996324	0.476716	0.243873	0.279412	0.104294	0.057669	0.001227	0.001225	0.230392	0.48652	0.748775	1	0.039216	0.197304	0.41299	0.800245	0.997549	0.006127	0.308824	0.525735	0.689951	0.991422	0.557598	0.38773	0.003676	0.262255	0.465686	0.735294	0.996324	0.392157
0.383356	0.326057	0.290587	0.25	0.229508	0.173497	0.005457	0.236016	0.523874	0.793997	1	0.002729	0.249659	0.492497	0.731241	0.995907	0.001364	0.255116	0.457026	0.698499	0.997271	0.480218	0.060027	0.459754	0.02459	0.095628	0.010929	0.001364	0.244202	0.476126	0.806276	1	0.155525	0.321965	0.357435	0.854025	0.897681	0.00955	0.229195	0.515689	0.695771	0.986357	0.432469	0.423497	0.008186	0.276944	0.435198	0.658936	0.994543	0.342428
0.375	0.305556	0.319444	0.181818	0.286713	0.237762	0.020833	0.222222	0.444444	0.708333	1	0.013889	0.208333	0.513889	0.791667	0.986111	0.006944	0.291667	0.534722	0.729167	0.979167	0.25	0	0.75	0	0.097902	0	0.006944	0.0625	0.326389	0.722222	1	0	0	0	0	0	0.083333	0.291667	0.506944	0.763889	0.979167	0.520833	0.377622	0.090278	0.326389	0.583333	0.756944	0.979167	0.340278
0.478972	0.292056	0.228972	0.250585	0.208431	0.140515	0.004673	0.189252	0.462617	0.768692	0.997664	0.007009	0.271028	0.514019	0.754673	1	0.002336	0.324766	0.518692	0.670561	0.995327	0.446262	0.044393	0.509346	0.023419	0.084309	0.004684	0.002336	0.175234	0.352804	0.764019	1	0.018692	0.093458	0.376168	0.983645	0.995327	0.044393	0.385514	0.542056	0.698598	0.922897	0.317757	0.388759	0.018692	0.287383	0.504673	0.623832	0.995327	0.366822
0.472727	0.276364	0.250909	0.244526	0.240876	0.156934	0.010909	0.272727	0.538182	0.792727	1	0.007273	0.243636	0.48	0.763636	0.992727	0.003636	0.225455	0.429091	0.64	0.967273	0.538182	0.127273	0.334545	0.058394	0.10219	0.007299	0.003636	0.221818	0.483636	0.770909	1	0.229091	0.345455	0.570909	0.64	0.767273	0.098182	0.2	0.530909	0.785455	0.989091	0.305455	0.313869	0.090909	0.221818	0.370909	0.592727	0.869091	0.305455
0.358416	0.346535	0.29505	0.248016	0.202381	0.19246	0.005941	0.281188	0.562376	0.772277	1	0.00396	0.160396	0.374257	0.710891	0.994059	0.00198	0.338614	0.540594	0.746535	0.99802	0.485149	0.156436	0.358416	0.053571	0.069444	0.005952	0.00198	0.120792	0.334653	0.687129	1	0.172277	0.445545	0.615842	0.79802	0.914851	0.20198	0.368317	0.544554	0.776238	0.99604	0.522772	0.353175	0.013861	0.322772	0.512871	0.752475	0.99604	0.39604
0.348315	0.286517	0.365169	0.19774	0.271186	0.231638	0.016854	0.230337	0.466292	0.713483	1	0.022472	0.179775	0.47191	0.724719	0.994382	0.005618	0.275281	0.52809	0.769663	0.977528	0.432584	0.41573	0.151685	0.141243	0.050847	0.00565	0.005618	0.196629	0.52809	0.808989	1	0.016854	0.331461	0.494382	0.696629	0.983146	0.073034	0.101124	0.258427	0.623596	0.865169	0.460674	0.508475	0.011236	0.258427	0.483146	0.730337	0.983146	0.325843
0.243094	0.48895	0.267956	0.210526	0.144044	0.240997	0.005525	0.196133	0.359116	0.505525	0.991713	0.008287	0.323204	0.646409	0.828729	1	0.002762	0.212707	0.428177	0.649171	0.986188	0.640884	0.185083	0.174033	0.074792	0.047091	0.00831	0.002762	0.323204	0.635359	0.801105	1	0.058011	0.171271	0.309392	0.428177	0.922652	0.046961	0.118785	0.353591	0.530387	0.98895	0.599448	0.243767	0.052486	0.417127	0.657459	0.823204	0.994475	0.486188
0.374172	0.304636	0.321192	0.232558	0.259136	0.192691	0.009934	0.304636	0.516556	0.764901	0.996689	0.006623	0.178808	0.506623	0.778146	0.990066	0.003311	0.228477	0.453642	0.695364	1	0.5	0.195364	0.304636	0.07309	0.046512	0.019934	0.003311	0.304636	0.582781	0.824503	1	0.072848	0.142384	0.569536	0.695364	0.887417	0.029801	0.245033	0.377483	0.559603	0.870861	0.427152	0.358804	0.023179	0.235099	0.496689	0.675497	0.950331	0.360927
0.392321	0.305509	0.30217	0.250836	0.225753	0.190635	0.021703	0.228715	0.465776	0.737896	1	0.005008	0.230384	0.504174	0.786311	0.998331	0.001669	0.287145	0.517529	0.729549	0.996661	0.347245	0.038397	0.614357	0.018395	0.091973	0.005017	0.001669	0.328881	0.616027	0.891486	1	0.006678	0.016694	0.131886	0.434057	0.813022	0.026711	0.24374	0.492487	0.686144	0.994992	0.462437	0.367893	0.005008	0.235392	0.470785	0.702838	0.996661	0.307179
0.333333	0.340476	0.32619	0.24105	0.236277	0.238663	0.009524	0.311905	0.545238	0.780952	0.995238	0.004762	0.192857	0.464286	0.709524	1	0.002381	0.235714	0.480952	0.747619	0.997619	0.354762	0.133333	0.511905	0.073986	0.102625	0.00716	0.002381	0.207143	0.535714	0.790476	1	0.078571	0.283333	0.52619	0.92619	0.997619	0.007143	0.254762	0.469048	0.707143	0.95	0.595238	0.377088	0.011905	0.242857	0.466667	0.683333	0.997619	0.364286
0.323232	0.40404	0.272727	0.258883	0.172589	0.228426	0.035354	0.328283	0.555556	0.772727	1	0.010101	0.151515	0.414141	0.651515	0.994949	0.005051	0.242424	0.575758	0.762626	0.979798	0.585859	0.20202	0.212121	0.071066	0.050761	0	0.005051	0.222222	0.434343	0.606061	1	0.080808	0.191919	0.671717	0.823232	0.89899	0.343434	0.388889	0.646465	0.757576	0.954545	0.373737	0.467005	0.025253	0.242424	0.565657	0.757576	0.979798	0.409091
0.28752	0.418641	0.293839	0.256329	0.183544	0.216772	0.00316	0.208531	0.505529	0.791469	0.99684	0.004739	0.276461	0.522907	0.772512	1	0.00158	0.229068	0.450237	0.665087	0.960506	0.492891	0.127962	0.379147	0.047468	0.079114	0.003165	0.00158	0.153239	0.503949	0.870458	1	0.022117	0.35387	0.492891	0.64613	0.900474	0.064771	0.278041	0.473934	0.734597	0.85624	0.477093	0.363924	0.011058	0.274882	0.462875	0.672986	0.982622	0.43128
0.346883	0.298103	0.355014	0.195652	0.282609	0.206522	0.02981	0.243902	0.533875	0.791328	0.99729	0.00542	0.257453	0.452575	0.728997	0.98645	0.00271	0.230352	0.517615	0.750678	1	0.368564	0.214092	0.417344	0.076087	0.081522	0	0.00271	0.284553	0.479675	0.804878	1	0.01084	0.186992	0.382114	0.528455	0.99187	0.04878	0.243902	0.590786	0.775068	0.98374	0.604336	0.413043	0.01084	0.271003	0.495935	0.734417	0.99458	0.306233
0.483221	0.278523	0.238255	0.228956	0.232323	0.141414	0.013423	0.197987	0.496644	0.761745	1	0.006711	0.248322	0.520134	0.795302	0.996644	0.003356	0.291946	0.479866	0.677852	0.939597	0.520134	0.134228	0.345638	0.047138	0.080808	0.013468	0.003356	0.157718	0.449664	0.738255	1	0.325503	0.456376	0.61745	0.674497	0.919463	0.013423	0.278523	0.503356	0.802013	0.95302	0.305369	0.296296	0.020134	0.318792	0.459732	0.66443	0.942953	0.338926
0.291405	0.395528	0.313068	0.228671	0.18951	0.246853	0.004193	0.30608	0.520615	0.762404	0.995807	0.001398	0.238994	0.51153	0.735849	0.998602	0.000699	0.228512	0.454228	0.748428	1	0.538784	0.374563	0.086653	0.11958	0.031469	0.006294	0.000699	0.255066	0.508036	0.716981	1	0.019567	0.236198	0.469602	0.75891	0.937806	0.002795	0.17051	0.590496	0.960867	0.998602	0.591195	0.28951	0.002795	0.238994	0.482879	0.763103	0.997904	0.42348
0.3711	0.417077	0.211823	0.291118	0.149671	0.179276	0.006568	0.244663	0.441708	0.71757	0.998358	0.003284	0.195402	0.44335	0.729064	0.996716	0.001642	0.45977	0.632184	0.793103	1	0.658456	0.119869	0.221675	0.03125	0.057566	0.008224	0.001642	0.167488	0.331691	0.622332	1	0.507389	0.640394	0.783251	0.876847	0.996716	0.006568	0.482759	0.632184	0.765189	0.950739	0.330049	0.223684	0.021346	0.536946	0.694581	0.834154	0.995074	0.431856
0.272311	0.491991	0.235698	0.215596	0.165138	0.224771	0.004577	0.281465	0.519451	0.839817	0.98627	0.009153	0.199085	0.510297	0.727689	0.997712	0.002288	0.240275	0.405034	0.803204	1	0.663616	0.011442	0.324943	0.009174	0.06422	0	0.002288	0.173913	0.544622	0.709382	1	0.025172	0.025172	0.02746	0.784897	0.789474	0.080092	0.279176	0.366133	0.874142	0.979405	0.510297	0.362385	0.006865	0.17849	0.368421	0.663616	0.993135	0.487414
0.282927	0.409756	0.307317	0.22549	0.196078	0.269608	0.009756	0.243902	0.404878	0.643902	0.956098	0.014634	0.22439	0.570732	0.804878	1	0.004878	0.239024	0.473171	0.702439	0.917073	0.409756	0.443902	0.146341	0.127451	0.039216	0	0.004878	0.326829	0.57561	0.809756	1	0.019512	0.297561	0.468293	0.643902	0.887805	0.078049	0.107317	0.24878	0.678049	0.970732	0.429268	0.441176	0.02439	0.253659	0.463415	0.702439	0.985366	0.419512
0.325949	0.363924	0.310127	0.228571	0.196825	0.209524	0.009494	0.281646	0.503165	0.78481	0.996835	0.006329	0.205696	0.414557	0.661392	0.984177	0.003165	0.25	0.528481	0.794304	1	0.424051	0.218354	0.357595	0.069841	0.069841	0	0.003165	0.208861	0.420886	0.632911	1	0.028481	0.170886	0.433544	0.75	0.936709	0.072785	0.389241	0.579114	0.822785	0.974684	0.553797	0.349206	0.025316	0.212025	0.458861	0.718354	0.987342	0.408228
0.302817	0.341549	0.355634	0.201413	0.215548	0.275618	0.017606	0.285211	0.507042	0.778169	0.996479	0.007042	0.228873	0.475352	0.711268	1	0.003521	0.232394	0.485915	0.725352	0.992958	0.415493	0.151408	0.433099	0.042403	0.091873	0	0.003521	0.179577	0.419014	0.690141	1	0.193662	0.285211	0.605634	0.644366	0.728873	0.045775	0.253521	0.528169	0.830986	0.992958	0.556338	0.424028	0.010563	0.235915	0.475352	0.679577	0.985915	0.352113
0.318681	0.412088	0.269231	0.287293	0.176796	0.259669	0.016484	0.274725	0.604396	0.796703	0.983516	0.010989	0.208791	0.43956	0.730769	1	0.005495	0.214286	0.467033	0.675824	0.950549	0.39011	0.406593	0.203297	0.154696	0.033149	0	0.005495	0.214286	0.571429	0.868132	1	0.016484	0.159341	0.472527	0.659341	0.961538	0.335165	0.379121	0.428571	0.796703	0.851648	0.461538	0.464088	0.032967	0.373626	0.510989	0.697802	0.950549	0.450549
0.379958	0.31524	0.304802	0.217573	0.240586	0.196653	0.010438	0.271399	0.532359	0.778706	1	0.004175	0.212944	0.442589	0.713987	0.995825	0.002088	0.258873	0.488518	0.732777	0.989562	0.409186	0.177453	0.413361	0.07113	0.083682	0.004184	0.002088	0.25261	0.517745	0.770355	1	0.087683	0.36952	0.509395	0.7119	0.993737	0.008351	0.194154	0.480167	0.734864	0.966597	0.542797	0.39749	0.008351	0.235908	0.473904	0.695198	0.995825	0.338205
0.285996	0.491124	0.22288	0.225296	0.142292	0.195652	0.005917	0.211045	0.380671	0.571992	0.948718	0.003945	0.343195	0.678501	0.82643	1	0.001972	0.157791	0.386588	0.581854	0.968442	0.717949	0.072978	0.209073	0.029644	0.033597	0.005929	0.001972	0.317554	0.621302	0.820513	1	0.005917	0.289941	0.325444	0.378698	0.591716	0.017751	0.151874	0.262327	0.4714	0.66075	0.329389	0.3083	0.00789	0.149901	0.343195	0.518738	0.936884	0.506903
0.213518	0.572965	0.213518	0.216923	0.103077	0.224615	0.010753	0.278034	0.460829	0.691244	0.990783	0.003072	0.204301	0.517665	0.752688	1	0.001536	0.310292	0.519201	0.803379	0.998464	0.726575	0.105991	0.167435	0.047692	0.032308	0.007692	0.001536	0.218126	0.579109	0.761905	1	0.225806	0.34255	0.44086	0.921659	0.996928	0.059908	0.248848	0.371736	0.511521	0.990783	0.572965	0.323077	0.00768	0.325653	0.56682	0.738863	0.998464	0.62212
0.49115	0.314159	0.19469	0.263858	0.146341	0.144124	0.00885	0.387168	0.659292	0.80531	1	0.004425	0.227876	0.415929	0.630531	0.997788	0.002212	0.152655	0.311947	0.480088	0.993363	0.679204	0.141593	0.179204	0.042129	0.064302	0.002217	0.002212	0.334071	0.637168	0.807522	1	0.013274	0.121681	0.188053	0.455752	0.993363	0.050885	0.15708	0.307522	0.411504	0.942478	0.314159	0.252772	0.019912	0.154867	0.263274	0.418142	0.995575	0.387168
0.343023	0.488372	0.168605	0.303207	0.139942	0.107872	0.008721	0.203488	0.436047	0.630814	0.994186	0.005814	0.284884	0.659884	0.822674	1	0.002907	0.247093	0.415698	0.534884	0.947674	0.712209	0.168605	0.119186	0.061224	0.03207	0.002915	0.002907	0.194767	0.642442	0.819767	1	0.165698	0.27907	0.375	0.517442	0.613372	0.162791	0.223837	0.331395	0.459302	0.630814	0.514535	0.268222	0.046512	0.40407	0.697674	0.825581	0.994186	0.488372
0.356077	0.353945	0.289979	0.267094	0.215812	0.179487	0.004264	0.204691	0.420043	0.731343	0.995736	0.027719	0.232409	0.486141	0.727079	1	0.002132	0.339019	0.5629	0.784648	0.989339	0.484009	0.025586	0.490405	0.017094	0.08547	0	0.002132	0.183369	0.309168	0.682303	1	0.014925	0.01919	0.191898	0.968017	0.974414	0.059701	0.424307	0.575693	0.771855	0.948827	0.458422	0.435897	0.014925	0.34968	0.550107	0.765458	0.989339	0.405117
0.257143	0.508163	0.234694	0.243354	0.149284	0.204499	0.012245	0.308163	0.563265	0.791837	0.993878	0.006122	0.222449	0.495918	0.718367	1	0.002041	0.238776	0.428571	0.773469	0.989796	0.687755	0.055102	0.257143	0.03681	0.04908	0.00409	0.002041	0.216327	0.504082	0.710204	1	0.059184	0.108163	0.226531	0.240816	0.708163	0.077551	0.365306	0.565306	0.908163	0.981633	0.469388	0.368098	0.008163	0.222449	0.495918	0.67551	0.989796	0.508163
0.389423	0.269231	0.341346	0.175904	0.296386	0.192771	0.009615	0.206731	0.502404	0.778846	0.997596	0.004808	0.293269	0.46875	0.728365	1	0.002404	0.242788	0.509615	0.730769	0.995192	0.408654	0.204327	0.387019	0.06988	0.079518	0.007229	0.002404	0.286058	0.53125	0.783654	1	0.086538	0.25	0.483173	0.764423	0.951923	0.007212	0.194712	0.439904	0.692308	0.978365	0.543269	0.4	0.007212	0.264423	0.478365	0.704327	0.995192	0.288462
0.402174	0.358696	0.23913	0.373626	0.186813	0.175824	0.054348	0.25	0.5	0.76087	1	0.021739	0.23913	0.521739	0.728261	0.98913	0.01087	0.141304	0.413043	0.597826	0.934783	0.315217	0.271739	0.413043	0.087912	0.10989	0.021978	0.01087	0.456522	0.673913	0.75	1	0.065217	0.130435	0.76087	0.826087	0.945652	0.032609	0.25	0.358696	0.5	0.978261	0.347826	0.43956	0.065217	0.326087	0.532609	0.695652	0.956522	0.391304
0.348238	0.407859	0.243902	0.255088	0.195387	0.170963	0.00813	0.239837	0.463415	0.701897	0.998645	0.00271	0.226287	0.440379	0.765583	0.99729	0.001355	0.314363	0.571816	0.768293	1	0.655827	0.150407	0.193767	0.067843	0.059701	0.005427	0.001355	0.222222	0.428184	0.677507	1	0.014905	0.318428	0.577236	0.754743	0.936314	0.02168	0.384824	0.558266	0.882114	0.993225	0.397019	0.415197	0.01355	0.342818	0.554201	0.772358	0.993225	0.399729
0.346341	0.395122	0.258537	0.240196	0.186275	0.20098	0.014634	0.190244	0.414634	0.717073	1	0.009756	0.346341	0.64878	0.863415	0.990244	0.004878	0.204878	0.404878	0.560976	0.8	0.360976	0.087805	0.55122	0.04902	0.068627	0	0.004878	0.170732	0.463415	0.726829	1	0.04878	0.639024	0.673171	0.702439	0.75122	0.092683	0.243902	0.453659	0.829268	0.970732	0.390244	0.392157	0.053659	0.263415	0.487805	0.619512	0.931707	0.4
0.27707	0.463376	0.259554	0.239234	0.140351	0.23445	0.009554	0.257962	0.466561	0.66879	0.988854	0.003185	0.237261	0.574841	0.835987	1	0.001592	0.248408	0.431529	0.656051	0.995223	0.55414	0.130573	0.315287	0.047847	0.060606	0.00319	0.001592	0.261146	0.625796	0.861465	1	0.133758	0.351911	0.487261	0.627389	0.708599	0.003185	0.205414	0.401274	0.600318	0.769108	0.558917	0.341308	0.003185	0.278662	0.506369	0.737261	0.996815	0.484076
0.473118	0.311828	0.215054	0.293478	0.217391	0.119565	0.053763	0.215054	0.430108	0.763441	1	0.021505	0.247312	0.537634	0.752688	0.978495	0.010753	0.322581	0.419355	0.666667	0.946237	0.193548	0.043011	0.763441	0.021739	0.065217	0	0.010753	0.043011	0.677419	0.763441	1	0.709677	0.709677	0.72043	0.731183	0.741935	0.053763	0.225806	0.419355	0.645161	0.978495	0.258065	0.369565	0.075269	0.344086	0.548387	0.688172	0.946237	0.27957
0.465714	0.35	0.184286	0.267525	0.164521	0.127325	0.002857	0.212857	0.492857	0.775714	0.998571	0.004286	0.234286	0.401429	0.664286	0.994286	0.001429	0.458571	0.604286	0.772857	1	0.607143	0.1	0.292857	0.041488	0.038627	0.001431	0.001429	0.178571	0.335714	0.607143	1	0.134286	0.468571	0.53	0.601429	0.96	0.024286	0.561429	0.734286	0.807143	0.881429	0.438571	0.309013	0.021429	0.351429	0.54	0.771429	0.994286	0.372857
0.403756	0.333333	0.262911	0.259434	0.254717	0.15566	0.014085	0.267606	0.492958	0.741784	1	0.00939	0.183099	0.408451	0.690141	0.995305	0.004695	0.319249	0.58216	0.779343	0.985915	0.488263	0.173709	0.338028	0.061321	0.070755	0.023585	0.004695	0.15493	0.516432	0.723005	1	0.230047	0.483568	0.638498	0.943662	0.99061	0.037559	0.328638	0.42723	0.737089	0.924883	0.460094	0.424528	0.018779	0.342723	0.502347	0.70892	0.985915	0.328638
0.366972	0.321101	0.311927	0.259259	0.25	0.185185	0.045872	0.266055	0.495413	0.798165	1	0.018349	0.247706	0.46789	0.66055	0.944954	0.009174	0.192661	0.486239	0.715596	0.972477	0.302752	0.266055	0.431193	0.092593	0.074074	0.018519	0.009174	0.247706	0.522936	0.642202	1	0.155963	0.211009	0.568807	0.688073	0.963303	0.027523	0.119266	0.357798	0.788991	0.926606	0.477064	0.444444	0.027523	0.220183	0.522936	0.715596	0.954128	0.302752
0.410156	0.320312	0.269531	0.25098	0.239216	0.188235	0.023438	0.265625	0.535156	0.722656	1	0.007812	0.183594	0.453125	0.691406	0.996094	0.003906	0.230469	0.523438	0.792969	0.980469	0.5625	0.28125	0.15625	0.109804	0.054902	0	0.003906	0.277344	0.523438	0.664062	1	0.027344	0.191406	0.464844	0.8125	0.980469	0.054688	0.261719	0.433594	0.886719	0.925781	0.335938	0.345098	0.015625	0.328125	0.539062	0.789062	0.980469	0.386719
0.370618	0.325543	0.30384	0.214047	0.217391	0.198997	0.003339	0.203673	0.479132	0.752922	0.998331	0.006678	0.257095	0.467446	0.741235	1	0.001669	0.308848	0.529215	0.732888	0.993322	0.435726	0.153589	0.410684	0.056856	0.090301	0.006689	0.001669	0.15025	0.355593	0.687813	1	0.026711	0.400668	0.589316	0.737896	0.861436	0.005008	0.327212	0.542571	0.786311	0.994992	0.482471	0.327759	0.005008	0.350584	0.524207	0.734558	0.993322	0.348915
0.373434	0.358396	0.26817	0.233375	0.183187	0.196989	0.002506	0.250627	0.513784	0.753133	0.998747	0.007519	0.201754	0.451128	0.746867	1	0.001253	0.300752	0.502506	0.739348	0.997494	0.512531	0.116541	0.370927	0.046424	0.076537	0.003764	0.001253	0.129073	0.389724	0.710526	1	0.182957	0.365915	0.517544	0.672932	0.91604	0.053885	0.373434	0.615288	0.833333	0.991228	0.427318	0.311167	0.010025	0.313283	0.487469	0.720551	0.997494	0.383459
0.336449	0.351135	0.312417	0.217914	0.219251	0.223262	0.004005	0.312417	0.542056	0.815754	1	0.008011	0.202937	0.479306	0.70761	0.99733	0.001335	0.222964	0.46996	0.699599	0.998665	0.403204	0.261682	0.335113	0.076203	0.057487	0.009358	0.001335	0.221629	0.516689	0.781041	1	0.006676	0.158879	0.508678	0.783712	0.923899	0.029372	0.296395	0.405874	0.716956	0.99733	0.574099	0.36631	0.012016	0.208278	0.479306	0.676903	0.998665	0.376502
0.323529	0.433824	0.242647	0.276753	0.151292	0.214022	0.011029	0.183824	0.463235	0.720588	0.996324	0.007353	0.216912	0.518382	0.779412	1	0.003676	0.330882	0.503676	0.713235	0.974265	0.363971	0.099265	0.536765	0.02952	0.103321	0	0.003676	0.102941	0.279412	0.709559	1	0.507353	0.801471	0.841912	0.875	0.900735	0.051471	0.327206	0.496324	0.661765	0.963235	0.452206	0.309963	0.018382	0.3125	0.481618	0.669118	0.966912	0.470588
0.446009	0.29108	0.262911	0.207547	0.264151	0.150943	0.00939	0.253521	0.478873	0.71831	0.995305	0.014085	0.328638	0.605634	0.816901	0.985915	0.004695	0.206573	0.408451	0.652582	1	0.516432	0.234742	0.248826	0.108491	0.042453	0.014151	0.004695	0.328638	0.525822	0.769953	1	0.032864	0.253521	0.384977	0.877934	0.948357	0.014085	0.103286	0.43662	0.58216	0.694836	0.262911	0.320755	0.018779	0.15493	0.356808	0.633803	0.938967	0.28169
0.290554	0.455852	0.253593	0.244604	0.14594	0.220966	0.002053	0.285421	0.514374	0.782341	0.997947	0.007187	0.198152	0.497947	0.762834	1	0.001027	0.287474	0.478439	0.701232	0.998973	0.559548	0.101643	0.338809	0.040082	0.068859	0.007194	0.001027	0.143737	0.428131	0.688912	1	0.00924	0.337782	0.467146	0.663244	0.932238	0.207392	0.396304	0.63963	0.799795	0.995893	0.434292	0.324769	0.007187	0.296715	0.488706	0.716632	0.99692	0.474333
0.376682	0.32287	0.300448	0.265766	0.202703	0.198198	0.013453	0.215247	0.538117	0.834081	0.986547	0.040359	0.269058	0.529148	0.735426	1	0.004484	0.197309	0.430493	0.672646	0.946188	0.816143	0.06278	0.121076	0.036036	0.063063	0.018018	0.004484	0.273543	0.524664	0.744395	1	0.03139	0.071749	0.313901	0.457399	0.946188	0.026906	0.112108	0.327354	0.901345	0.982063	0.327354	0.432432	0.017937	0.224215	0.443946	0.64574	0.955157	0.376682
0.299258	0.459604	0.241138	0.276289	0.12701	0.23134	0.001649	0.273289	0.622836	0.805853	0.999588	0.000824	0.248557	0.471558	0.702391	1	0.000412	0.234542	0.459604	0.686727	0.998763	0.73413	0.064303	0.201566	0.036289	0.065979	0.002474	0.000412	0.210635	0.402721	0.681781	1	0.037923	0.560594	0.607997	0.677659	0.998763	0.002061	0.430338	0.736191	0.838829	0.981451	0.363561	0.256495	0.002061	0.334295	0.435697	0.642209	0.998763	0.472795
0.413793	0.37931	0.206897	0.288184	0.149856	0.18732	0.011494	0.29023	0.482759	0.772989	0.971264	0.005747	0.238506	0.5	0.744253	1	0.002874	0.215517	0.436782	0.718391	0.994253	0.482759	0.20977	0.307471	0.074928	0.086455	0	0.002874	0.158046	0.408046	0.695402	1	0.126437	0.270115	0.594828	0.718391	0.994253	0.008621	0.310345	0.531609	0.795977	0.95977	0.399425	0.334294	0.020115	0.270115	0.531609	0.75	0.994253	0.41954
0.352798	0.374696	0.272506	0.270732	0.178049	0.214634	0.004866	0.257908	0.547445	0.83455	0.995134	0.014599	0.294404	0.498783	0.737226	1	0.002433	0.192214	0.437956	0.6618	0.973236	0.635036	0.07056	0.294404	0.029268	0.063415	0.004878	0.002433	0.425791	0.625304	0.798054	1	0.099757	0.114355	0.277372	0.294404	0.990268	0.014599	0.150852	0.233577	0.447689	0.924574	0.479319	0.404878	0.014599	0.194647	0.379562	0.717762	0.992701	0.423358
0.450704	0.232394	0.316901	0.184397	0.297872	0.156028	0.014085	0.225352	0.43662	0.739437	0.992958	0.021127	0.302817	0.549296	0.802817	0.957746	0.007042	0.21831	0.507042	0.690141	1	0.232394	0	0.767606	0	0.12766	0	0.007042	0.260563	0.5	0.690141	1	0	0	0	0	0	0.028169	0.239437	0.464789	0.746479	0.978873	0.535211	0.368794	0.035211	0.302817	0.521127	0.71831	0.922535	0.260563
0.373585	0.403774	0.222642	0.234139	0.164653	0.173716	0.005283	0.209811	0.438491	0.69283	0.999245	0.001509	0.273208	0.544151	0.759245	0.996226	0.000755	0.283774	0.529057	0.802264	1	0.671698	0.068679	0.259623	0.029456	0.062689	0.005287	0.000755	0.237736	0.533585	0.77283	1	0.002264	0.050566	0.480755	0.687547	0.903396	0.009811	0.306415	0.426415	0.676981	0.96	0.477736	0.291541	0.003774	0.32	0.632453	0.86717	0.996226	0.446038
0.353333	0.306667	0.34	0.202673	0.238307	0.193764	0.004444	0.302222	0.522222	0.797778	0.997778	0.006667	0.18	0.464444	0.737778	0.995556	0.002222	0.251111	0.493333	0.711111	1	0.411111	0.173333	0.415556	0.055679	0.095768	0.006682	0.002222	0.277778	0.573333	0.835556	1	0.095556	0.284444	0.466667	0.668889	0.784444	0.011111	0.195556	0.431111	0.688889	0.993333	0.542222	0.347439	0.011111	0.213333	0.413333	0.68	0.991111	0.322222
0.282451	0.390447	0.327103	0.205821	0.199584	0.279626	0.002077	0.224299	0.476636	0.739356	0.997923	0.003115	0.283489	0.537902	0.779855	1	0.001038	0.253375	0.477674	0.724818	0.998962	0.47352	0.166147	0.360332	0.076923	0.087318	0.008316	0.001038	0.279335	0.556594	0.760125	1	0.022845	0.274143	0.507788	0.773624	0.976116	0.010384	0.226376	0.418484	0.701973	0.997923	0.615784	0.365904	0.003115	0.262721	0.477674	0.751817	0.998962	0.407061
0.330827	0.488722	0.180451	0.295455	0.121212	0.189394	0.022556	0.278195	0.496241	0.699248	1	0.015038	0.240602	0.518797	0.774436	0.977444	0.007519	0.233083	0.330827	0.654135	0.992481	0.368421	0.345865	0.285714	0.174242	0.05303	0.007576	0.007519	0.330827	0.533835	0.714286	1	0.172932	0.390977	0.586466	0.81203	0.992481	0.037594	0.097744	0.240602	0.308271	0.909774	0.473684	0.393939	0.030075	0.240602	0.556391	0.796992	0.992481	0.496241
0.297297	0.335135	0.367568	0.157609	0.271739	0.266304	0.010811	0.227027	0.535135	0.751351	1	0.032432	0.2	0.383784	0.745946	0.989189	0.005405	0.264865	0.524324	0.72973	0.983784	0.416216	0.464865	0.118919	0.130435	0.032609	0	0.005405	0.291892	0.535135	0.821622	1	0.010811	0.351351	0.545946	0.718919	0.989189	0.075676	0.097297	0.243243	0.27027	0.756757	0.459459	0.51087	0.016216	0.286486	0.497297	0.735135	0.989189	0.362162
0.419355	0.236559	0.344086	0.163043	0.336957	0.152174	0.021505	0.204301	0.44086	0.677419	0.989247	0.107527	0.247312	0.569892	0.752688	1	0.010753	0.258065	0.462366	0.817204	0.967742	0.451613	0.333333	0.215054	0.173913	0.043478	0	0.010753	0.301075	0.677419	0.870968	1	0.032258	0.247312	0.537634	0.709677	0.924731	0.11828	0.16129	0.354839	0.408602	0.462366	0.387097	0.413043	0.032258	0.236559	0.462366	0.784946	0.956989	0.236559
0.335329	0.377246	0.287425	0.256	0.186	0.228	0.003992	0.275449	0.552894	0.854291	1	0.00998	0.201597	0.403194	0.704591	0.996008	0.001996	0.297405	0.512974	0.700599	0.962076	0.44511	0.157685	0.397206	0.06	0.076	0.004	0.001996	0.115768	0.349301	0.702595	1	0.125749	0.397206	0.562874	0.746507	0.848303	0.0998	0.329341	0.548902	0.858283	0.984032	0.48503	0.328	0.005988	0.301397	0.491018	0.724551	0.924152	0.411178
0.322531	0.449074	0.228395	0.285935	0.145286	0.196291	0.009259	0.228395	0.54321	0.811728	1	0.003086	0.311728	0.515432	0.780864	0.993827	0.001543	0.154321	0.429012	0.595679	0.984568	0.682099	0.057099	0.260802	0.02473	0.040185	0.009274	0.001543	0.307099	0.510802	0.819444	1	0.054012	0.08179	0.385802	0.470679	0.966049	0.021605	0.228395	0.530864	0.621914	0.720679	0.507716	0.31221	0.010802	0.216049	0.476852	0.635802	0.967593	0.453704
0.383117	0.266234	0.350649	0.183007	0.294118	0.183007	0.012987	0.272727	0.441558	0.714286	1	0.084416	0.233766	0.571429	0.785714	0.967532	0.006494	0.194805	0.487013	0.720779	0.961039	0.37013	0.311688	0.318182	0.130719	0.039216	0.013072	0.006494	0.142857	0.551948	0.766234	1	0.012987	0.24026	0.603896	0.863636	0.961039	0.162338	0.311688	0.38961	0.467532	0.798701	0.38961	0.48366	0.019481	0.201299	0.519481	0.720779	0.954545	0.25974
0.404959	0.322314	0.272727	0.225	0.241667	0.191667	0.016529	0.190083	0.413223	0.710744	0.991736	0.033058	0.305785	0.53719	0.768595	0.975207	0.008264	0.280992	0.471074	0.735537	1	0.330579	0.231405	0.438017	0.083333	0.083333	0	0.008264	0.239669	0.487603	0.809917	1	0.256198	0.330579	0.38843	0.752066	0.85124	0.041322	0.140496	0.586777	0.694215	0.958678	0.446281	0.3	0.099174	0.330579	0.487603	0.793388	0.983471	0.272727
0.337748	0.374172	0.288079	0.232558	0.20598	0.182724	0.006623	0.198675	0.456954	0.682119	0.986755	0.016556	0.344371	0.569536	0.781457	1	0.003311	0.188742	0.433775	0.748344	0.996689	0.506623	0.298013	0.195364	0.112957	0.046512	0.019934	0.003311	0.254967	0.463576	0.735099	1	0.019868	0.288079	0.566225	0.745033	0.94702	0.049669	0.115894	0.400662	0.718543	0.996689	0.529801	0.385382	0.02649	0.334437	0.523179	0.778146	0.993377	0.354305
0.332606	0.367503	0.299891	0.232533	0.20524	0.221616	0.004362	0.258451	0.507088	0.732824	1	0.002181	0.232279	0.529989	0.770992	0.997819	0.001091	0.245365	0.466739	0.726281	0.998909	0.417666	0.185387	0.396947	0.092795	0.076419	0.008734	0.001091	0.266085	0.544166	0.804798	0.996728	0.029444	0.220284	0.693566	0.865867	1	0.005453	0.25627	0.473282	0.603053	0.961832	0.502726	0.388646	0.005453	0.25627	0.454744	0.733915	0.996728	0.410033
0.308442	0.415584	0.275974	0.201954	0.159609	0.260586	0.061688	0.308442	0.512987	0.74026	1	0.006494	0.159091	0.415584	0.743506	0.980519	0.003247	0.217532	0.535714	0.766234	0.996753	0.470779	0.201299	0.327922	0.081433	0.081433	0.016287	0.003247	0.191558	0.366883	0.688312	1	0.094156	0.204545	0.558442	0.730519	0.808442	0.042208	0.422078	0.646104	0.866883	0.993506	0.470779	0.416938	0.016234	0.279221	0.590909	0.798701	0.993506	0.428571
0.391304	0.467391	0.141304	0.351648	0.120879	0.131868	0.032609	0.173913	0.369565	0.652174	1	0.021739	0.326087	0.576087	0.793478	0.98913	0.01087	0.26087	0.380435	0.630435	0.858696	0.163043	0	0.836957	0	0.065934	0	0.01087	0.032609	0.695652	0.73913	1	0	0	0	0	0	0.054348	0.25	0.478261	0.684783	0.978261	0.282609	0.417582	0.076087	0.304348	0.543478	0.717391	0.945652	0.467391
0.397576	0.345455	0.25697	0.256068	0.199029	0.163835	0.006061	0.306667	0.58303	0.803636	1	0.002424	0.220606	0.464242	0.718788	0.995152	0.001212	0.21697	0.398788	0.667879	0.997576	0.446061	0.124848	0.429091	0.052184	0.076456	0.003641	0.001212	0.236364	0.569697	0.740606	1	0.048485	0.246061	0.395152	0.574545	0.97697	0.030303	0.253333	0.521212	0.755152	0.996364	0.390303	0.300971	0.042424	0.214545	0.379394	0.552727	0.996364	0.397576
0.333333	0.466361	0.200306	0.279959	0.141254	0.193269	0.001019	0.205912	0.453109	0.700306	0.998981	0.003058	0.258919	0.492864	0.770642	0.99949	0.00051	0.286952	0.587156	0.787971	1	0.842508	0.043323	0.114169	0.028047	0.033146	0.00051	0.00051	0.253313	0.477064	0.754842	1	0.044343	0.166157	0.286952	0.546891	0.941896	0.001529	0.506626	0.712538	0.746177	0.992355	0.480632	0.321265	0.002039	0.268094	0.533639	0.817533	0.998471	0.488787
0.304997	0.390006	0.304997	0.224713	0.195977	0.227011	0.001149	0.275129	0.490523	0.7444	0.999426	0.001723	0.210224	0.469845	0.740953	0.998851	0.000574	0.257323	0.536473	0.757611	1	0.548535	0.161401	0.290063	0.071264	0.064368	0.011494	0.000574	0.179782	0.441126	0.741528	1	0.015508	0.31189	0.531304	0.761631	0.995405	0.00919	0.283171	0.57668	0.74842	0.98162	0.487076	0.402299	0.005744	0.247559	0.51637	0.757036	0.998277	0.402642
0.34058	0.362319	0.297101	0.243194	0.210526	0.219601	0.005435	0.255435	0.536232	0.797101	0.996377	0.003623	0.28442	0.528986	0.778986	1	0.001812	0.184783	0.427536	0.630435	0.992754	0.467391	0.063406	0.469203	0.019964	0.07804	0.005445	0.001812	0.26087	0.641304	0.824275	1	0.056159	0.068841	0.186594	0.373188	0.615942	0.005435	0.29529	0.461957	0.652174	0.994565	0.496377	0.315789	0.007246	0.217391	0.45471	0.625	0.992754	0.418478
0.416	0.3072	0.2768	0.25641	0.221154	0.189103	0.0048	0.2	0.4304	0.6704	0.9984	0.0032	0.2768	0.6032	0.8192	0.9968	0.0016	0.3152	0.5264	0.7376	1	0.5104	0.1616	0.328	0.070513	0.048077	0	0.0016	0.1936	0.4048	0.7904	1	0.0912	0.2816	0.7872	0.8784	0.992	0.0144	0.3472	0.4976	0.5792	0.7088	0.4192	0.394231	0.0096	0.3424	0.5968	0.8096	0.9968	0.3648
0.452632	0.178947	0.368421	0.180851	0.319149	0.095745	0.021053	0.221053	0.442105	0.736842	1	0.042105	0.168421	0.463158	0.610526	0.863158	0.010526	0.231579	0.505263	0.789474	0.957895	0.305263	0.326316	0.368421	0.085106	0.06383	0.021277	0.010526	0.147368	0.452632	0.6	1	0.042105	0.105263	0.505263	0.652632	0.968421	0.168421	0.242105	0.336842	0.8	0.926316	0.484211	0.425532	0.042105	0.231579	0.515789	0.705263	0.957895	0.2
0.329333	0.412	0.258667	0.259012	0.193591	0.189586	0.004	0.256	0.5	0.726667	1	0.002667	0.186667	0.456	0.761333	0.996	0.001333	0.34	0.554667	0.746667	0.993333	0.618667	0.128	0.253333	0.056075	0.066756	0.00267	0.001333	0.170667	0.44	0.790667	1	0.008	0.4	0.646667	0.722667	0.977333	0.08	0.322667	0.52	0.684	0.968	0.517333	0.437917	0.008	0.221333	0.530667	0.742667	0.994667	0.38
0.354535	0.285041	0.360424	0.193396	0.246462	0.205189	0.004711	0.268551	0.514723	0.791519	1	0.003534	0.281508	0.507656	0.727915	0.998822	0.001178	0.203769	0.468787	0.722026	0.992933	0.3298	0.189635	0.480565	0.069575	0.083726	0.003538	0.001178	0.314488	0.539458	0.762073	1	0.146054	0.308598	0.546525	0.829211	0.995289	0.011779	0.166078	0.436985	0.689046	0.96702	0.542992	0.382075	0.010601	0.274441	0.475854	0.705536	0.992933	0.286219
0.32153	0.40085	0.27762	0.239716	0.191489	0.204255	0.002833	0.276204	0.525496	0.774788	0.997167	0.004249	0.216714	0.432011	0.720963	1	0.001416	0.273371	0.542493	0.752125	0.990085	0.562323	0.101983	0.335694	0.036879	0.087943	0.002837	0.001416	0.314448	0.502833	0.800283	1	0.157224	0.345609	0.750708	0.827195	0.917847	0.016997	0.194051	0.466006	0.651558	0.947592	0.477337	0.371631	0.016997	0.280453	0.5	0.752125	0.990085	0.439093
0.294393	0.364486	0.341121	0.215962	0.201878	0.215962	0.023364	0.275701	0.495327	0.761682	1	0.009346	0.233645	0.415888	0.654206	0.953271	0.004673	0.196262	0.565421	0.82243	0.995327	0.537383	0.140187	0.32243	0.065728	0.065728	0	0.004673	0.261682	0.397196	0.64486	1	0.018692	0.046729	0.598131	0.752336	0.934579	0.11215	0.214953	0.565421	0.799065	0.990654	0.514019	0.356808	0.018692	0.317757	0.523364	0.757009	0.990654	0.364486
0.364217	0.36262	0.273163	0.2432	0.1792	0.2016	0.01278	0.180511	0.460064	0.785942	0.996805	0.003195	0.238019	0.461661	0.693291	0.998403	0.001597	0.367412	0.565495	0.755591	1	0.5623	0.123003	0.314696	0.0448	0.0832	0.0064	0.001597	0.167732	0.322684	0.672524	1	0.28754	0.536741	0.65655	0.803514	0.884984	0.031949	0.397764	0.578275	0.779553	0.996805	0.448882	0.3072	0.022364	0.391374	0.552716	0.761981	0.995208	0.42492
0.20283	0.584906	0.212264	0.186761	0.104019	0.219858	0.018868	0.15566	0.308962	0.455189	1	0.004717	0.391509	0.629717	0.799528	0.997642	0.002358	0.17217	0.34434	0.582547	0.995283	0.721698	0.125	0.153302	0.042553	0.047281	0	0.002358	0.398585	0.629717	0.818396	1	0.033019	0.108491	0.20283	0.308962	0.412736	0.018868	0.153302	0.28066	0.436321	0.775943	0.603774	0.335697	0.03066	0.339623	0.601415	0.778302	0.995283	0.549528
0.307087	0.401575	0.291339	0.27668	0.15415	0.245059	0.043307	0.220472	0.519685	0.755906	1	0.007874	0.275591	0.507874	0.771654	0.988189	0.003937	0.23622	0.472441	0.669291	0.992126	0.326772	0.102362	0.570866	0.039526	0.102767	0	0.003937	0.188976	0.448819	0.767717	1	0.011811	0.031496	0.80315	0.858268	0.893701	0.070866	0.295276	0.492126	0.649606	0.988189	0.503937	0.339921	0.011811	0.259843	0.437008	0.649606	0.992126	0.409449
0.39708	0.313869	0.289051	0.255848	0.21345	0.185673	0.007299	0.213139	0.515328	0.785401	1	0.011679	0.233577	0.461314	0.725547	0.99562	0.00146	0.294891	0.512409	0.705109	0.99708	0.513869	0.128467	0.357664	0.05117	0.059942	0.00731	0.00146	0.154745	0.470073	0.865693	1	0.00438	0.359124	0.519708	0.672993	0.90073	0.013139	0.328467	0.559124	0.759124	0.858394	0.486131	0.342105	0.00438	0.280292	0.472993	0.69635	0.99708	0.340146
0.37931	0.352087	0.268603	0.285455	0.198182	0.183636	0.00726	0.255898	0.537205	0.749546	0.994555	0.00363	0.232305	0.408348	0.709619	0.998185	0.001815	0.248639	0.53539	0.767695	1	0.540835	0.14882	0.310345	0.061818	0.065455	0.003636	0.001815	0.252269	0.439201	0.747731	1	0.041742	0.23775	0.491833	0.588022	0.807623	0.018149	0.274047	0.640653	0.833031	0.978221	0.459165	0.338182	0.010889	0.283122	0.586207	0.780399	0.983666	0.37931
0.38439	0.30439	0.31122	0.21582	0.234375	0.188477	0.002927	0.257561	0.523902	0.727805	1	0.001951	0.249756	0.479024	0.738537	0.997073	0.000976	0.232195	0.480976	0.778537	0.996098	0.396098	0.137561	0.466341	0.049805	0.088867	0.004883	0.000976	0.242927	0.44	0.737561	1	0.022439	0.428293	0.767805	0.916098	0.980488	0.007805	0.177561	0.499512	0.674146	0.994146	0.498537	0.398438	0.003902	0.272195	0.48	0.737561	0.995122	0.327805
0.27451	0.502451	0.223039	0.238037	0.11411	0.213497	0.002451	0.259804	0.48652	0.794118	1	0.003676	0.203431	0.457108	0.675245	0.998775	0.001225	0.340686	0.604167	0.792892	0.997549	0.682598	0.171569	0.145833	0.077301	0.040491	0.003681	0.001225	0.234069	0.498775	0.762255	1	0.04902	0.468137	0.632353	0.785539	0.991422	0.082108	0.214461	0.269608	0.405637	0.944853	0.457108	0.33865	0.01348	0.22549	0.534314	0.713235	0.992647	0.471814
0.347826	0.336957	0.315217	0.230769	0.208791	0.197802	0.054348	0.195652	0.423913	0.836957	0.978261	0.021739	0.391304	0.630435	0.76087	1	0.01087	0.184783	0.347826	0.608696	0.804348	0.467391	0.358696	0.173913	0.10989	0.043956	0.021978	0.01087	0.315217	0.73913	0.880435	1	0.25	0.369565	0.48913	0.597826	0.782609	0.032609	0.108696	0.152174	0.195652	0.663043	0.456522	0.285714	0.097826	0.293478	0.456522	0.630435	0.793478	0.293478
0.378738	0.285714	0.335548	0.22	0.223333	0.18	0.006645	0.302326	0.601329	0.797342	1	0.009967	0.182724	0.405316	0.611296	0.983389	0.003322	0.249169	0.495017	0.717608	0.980066	0.418605	0.229236	0.352159	0.08	0.066667	0	0.003322	0.189369	0.481728	0.69103	1	0.013289	0.162791	0.398671	0.747508	0.923588	0.059801	0.352159	0.551495	0.807309	0.963455	0.55814	0.346667	0.016611	0.219269	0.45515	0.707641	0.976744	0.292359
0.349206	0.361905	0.288889	0.235669	0.210191	0.203822	0.015873	0.266667	0.438095	0.688889	0.996825	0.006349	0.250794	0.536508	0.771429	0.993651	0.003175	0.206349	0.51746	0.790476	1	0.555556	0.250794	0.193651	0.124204	0.066879	0.003185	0.003175	0.266667	0.479365	0.749206	1	0.038095	0.273016	0.539683	0.796825	0.996825	0.066667	0.215873	0.406349	0.593651	0.933333	0.549206	0.33121	0.019048	0.215873	0.514286	0.730159	0.990476	0.380952
0.384615	0.384615	0.230769	0.322222	0.188889	0.111111	0.032967	0.307692	0.494505	0.78022	0.978022	0.076923	0.197802	0.461538	0.736264	1	0.010989	0.098901	0.428571	0.681319	0.912088	0.461538	0.296703	0.241758	0.111111	0.066667	0	0.010989	0.296703	0.483516	0.736264	1	0.021978	0.076923	0.230769	0.406593	0.593407	0.615385	0.659341	0.791209	0.846154	0.945055	0.450549	0.333333	0.021978	0.21978	0.428571	0.648352	0.912088	0.351648
0.308029	0.39854	0.293431	0.230994	0.185673	0.219298	0.013139	0.143066	0.420438	0.686131	1	0.00292	0.306569	0.563504	0.807299	0.99708	0.00146	0.277372	0.458394	0.712409	0.941606	0.519708	0.141606	0.338686	0.054094	0.068713	0.004386	0.00146	0.134307	0.464234	0.805839	1	0.005839	0.347445	0.490511	0.648175	0.916788	0.159124	0.332847	0.543066	0.731387	0.90219	0.50073	0.345029	0.00438	0.29927	0.510949	0.722628	0.979562	0.445255
0.343186	0.35468	0.302135	0.228618	0.182566	0.213816	0.003284	0.293924	0.505747	0.758621	0.998358	0.006568	0.211823	0.490969	0.766831	1	0.001642	0.256158	0.495895	0.727422	0.981938	0.446634	0.134647	0.418719	0.049342	0.085526	0.006579	0.001642	0.238095	0.472906	0.719212	1	0.027915	0.229885	0.422003	0.661741	0.954023	0.050903	0.249589	0.536946	0.809524	0.986864	0.500821	0.345395	0.013136	0.226601	0.464696	0.701149	0.934319	0.357964
0.325714	0.379048	0.295238	0.232824	0.192748	0.221374	0.011429	0.268571	0.48	0.805714	1	0.00381	0.241905	0.554286	0.779048	0.986667	0.001905	0.198095	0.441905	0.641905	0.998095	0.466667	0.07619	0.457143	0.028626	0.078244	0.005725	0.001905	0.262857	0.617143	0.84381	1	0.059048	0.171429	0.220952	0.598095	0.986667	0.005714	0.314286	0.48	0.645714	0.99619	0.525714	0.320611	0.007619	0.234286	0.481905	0.666667	0.99619	0.417143
0.272189	0.573964	0.153846	0.220238	0.113095	0.113095	0.017751	0.183432	0.343195	0.47929	0.934911	0.011834	0.497041	0.656805	0.816568	0.994083	0.005917	0.076923	0.218935	0.35503	1	0.650888	0.218935	0.130178	0.083333	0.02381	0	0.005917	0.431953	0.633136	0.822485	1	0.04142	0.207101	0.295858	0.455621	0.869822	0.112426	0.136095	0.171598	0.360947	0.39645	0.591716	0.321429	0.035503	0.313609	0.662722	0.822485	0.988166	0.579882
0.343949	0.343949	0.312102	0.307692	0.198718	0.230769	0.012739	0.235669	0.477707	0.738854	1	0.076433	0.242038	0.452229	0.719745	0.993631	0.006369	0.184713	0.535032	0.726115	0.961783	0.630573	0.165605	0.203822	0.057692	0.044872	0.019231	0.006369	0.191083	0.350318	0.617834	1	0.019108	0.490446	0.764331	0.821656	0.974522	0.044586	0.541401	0.66242	0.88535	0.936306	0.414013	0.410256	0.019108	0.261146	0.414013	0.707006	0.968153	0.369427
0.359375	0.317708	0.322917	0.230366	0.209424	0.26178	0.020833	0.244792	0.46875	0.755208	0.963542	0.010417	0.229167	0.489583	0.703125	0.989583	0.005208	0.25	0.510417	0.75	1	0.46875	0.208333	0.322917	0.109948	0.057592	0.005236	0.005208	0.317708	0.567708	0.713542	1	0.161458	0.338542	0.463542	0.755208	0.994792	0.015625	0.109375	0.307292	0.822917	0.96875	0.484375	0.460733	0.026042	0.270833	0.505208	0.734375	0.994792	0.307292
0.346961	0.331492	0.321547	0.221239	0.220133	0.210177	0.00221	0.275138	0.524862	0.78232	1	0.00663	0.232044	0.456354	0.717127	0.99558	0.001105	0.228729	0.496133	0.728177	0.981215	0.418785	0.128177	0.453039	0.054204	0.080752	0.001106	0.001105	0.245304	0.516022	0.770166	1	0.00221	0.342541	0.477348	0.643094	0.977901	0.014365	0.20663	0.509392	0.754696	0.994475	0.517127	0.391593	0.003315	0.257459	0.510497	0.708287	0.99337	0.358011
0.306931	0.405941	0.287129	0.31	0.16	0.25	0.029703	0.188119	0.49505	0.722772	1	0.019802	0.247525	0.455446	0.732673	0.980198	0.009901	0.29703	0.50495	0.712871	0.950495	0.425743	0.376238	0.19802	0.11	0.05	0.01	0.009901	0.237624	0.445545	0.712871	1	0.039604	0.287129	0.60396	0.762376	0.920792	0.178218	0.217822	0.485149	0.534653	0.970297	0.49505	0.4	0.039604	0.29703	0.514851	0.792079	0.960396	0.415842
0.347032	0.360731	0.292237	0.256293	0.221968	0.183066	0.006849	0.271689	0.547945	0.773973	1	0.004566	0.212329	0.488584	0.730594	0.986301	0.002283	0.244292	0.479452	0.762557	0.995434	0.360731	0.136986	0.502283	0.077803	0.10984	0.004577	0.002283	0.212329	0.518265	0.785388	1	0.06621	0.299087	0.52968	0.920091	0.995434	0.020548	0.269406	0.481735	0.710046	0.947489	0.579909	0.389016	0.011416	0.244292	0.472603	0.700913	0.995434	0.401826
0.328125	0.375	0.296875	0.215686	0.168627	0.215686	0.070312	0.300781	0.519531	0.792969	0.984375	0.007812	0.195312	0.488281	0.71875	0.996094	0.003906	0.191406	0.492188	0.6875	1	0.554688	0.246094	0.199219	0.070588	0.054902	0.007843	0.003906	0.195312	0.476562	0.804688	1	0.015625	0.527344	0.632812	0.757812	0.878906	0.019531	0.199219	0.253906	0.410156	0.972656	0.34375	0.4	0.023438	0.238281	0.5	0.691406	0.972656	0.375
0.339408	0.379651	0.280942	0.227204	0.193769	0.205927	0.002278	0.307517	0.517844	0.763857	0.999241	0.003797	0.162491	0.39104	0.692483	0.998481	0.000759	0.35915	0.589218	0.798026	1	0.607441	0.069096	0.323462	0.030395	0.068389	0.006079	0.000759	0.15186	0.303721	0.546697	1	0.350038	0.394077	0.45634	0.580866	0.901291	0.319666	0.624146	0.743356	0.88003	0.996203	0.507973	0.37386	0.001519	0.186029	0.529992	0.765376	0.997722	0.408504
0.295082	0.352459	0.352459	0.194521	0.227397	0.243836	0.016393	0.20765	0.540984	0.756831	0.997268	0.005464	0.26776	0.453552	0.674863	0.991803	0.002732	0.251366	0.513661	0.762295	1	0.404372	0.128415	0.467213	0.063014	0.079452	0.00274	0.002732	0.270492	0.494536	0.655738	1	0.010929	0.068306	0.513661	0.931694	0.986339	0.092896	0.245902	0.483607	0.743169	0.893443	0.63388	0.334247	0.010929	0.26776	0.491803	0.724044	0.991803	0.42623
0.330189	0.396226	0.273585	0.2	0.219048	0.219048	0.037736	0.264151	0.433962	0.716981	0.990566	0.018868	0.245283	0.59434	0.858491	0.981132	0.009434	0.179245	0.424528	0.613208	1	0.415094	0.04717	0.537736	0.019048	0.114286	0	0.009434	0.301887	0.716981	0.896226	1	0.613208	0.613208	0.622642	0.632075	0.650943	0.037736	0.179245	0.377358	0.509434	0.830189	0.330189	0.380952	0.04717	0.198113	0.386792	0.603774	0.830189	0.415094
0.300885	0.40708	0.292035	0.214286	0.196429	0.205357	0.026549	0.19469	0.566372	0.831858	0.982301	0.017699	0.212389	0.389381	0.646018	1	0.00885	0.353982	0.548673	0.752212	0.99115	0.451327	0.212389	0.336283	0.089286	0.035714	0	0.00885	0.106195	0.300885	0.557522	1	0.132743	0.230088	0.371681	0.548673	0.628319	0.389381	0.681416	0.769912	0.849558	0.938053	0.362832	0.375	0.070796	0.274336	0.415929	0.610619	0.938053	0.415929
0.32715	0.406408	0.266442	0.263514	0.163851	0.202703	0.003373	0.161889	0.467116	0.735245	1	0.006745	0.25801	0.526138	0.772344	0.998314	0.001686	0.317032	0.509275	0.715008	0.978078	0.50253	0.139966	0.357504	0.050676	0.077703	0.006757	0.001686	0.131535	0.376054	0.650927	1	0.183811	0.470489	0.630691	0.753794	0.887015	0.006745	0.350759	0.581788	0.789207	0.988196	0.505902	0.344595	0.006745	0.330523	0.51602	0.738617	0.966273	0.438449
0.307143	0.321429	0.371429	0.150538	0.229391	0.25448	0.017857	0.221429	0.489286	0.807143	0.982143	0.007143	0.307143	0.553571	0.696429	1	0.003571	0.210714	0.460714	0.714286	0.989286	0.364286	0.175	0.460714	0.050179	0.09319	0	0.003571	0.189286	0.442857	0.721429	1	0.157143	0.317857	0.414286	0.621429	0.714286	0.007143	0.221429	0.510714	0.810714	0.992857	0.546429	0.401434	0.014286	0.246429	0.464286	0.678571	0.989286	0.328571
0.37963	0.296296	0.324074	0.261682	0.196262	0.205607	0.027778	0.222222	0.490741	0.777778	1	0.064815	0.231481	0.481481	0.648148	0.972222	0.009259	0.259259	0.425926	0.731481	0.981481	0.416667	0.555556	0.027778	0.186916	0.018692	0	0.009259	0.305556	0.518519	0.75	1	0.055556	0.259259	0.444444	0.694444	0.972222	0.018519	0.018519	0.018519	0.027778	0.037037	0.444444	0.35514	0.055556	0.268519	0.537037	0.675926	0.981481	0.351852
0.267857	0.487013	0.24513	0.214634	0.120325	0.253659	0.00487	0.224026	0.449675	0.775974	0.993506	0.003247	0.267857	0.540584	0.727273	0.996753	0.001623	0.23539	0.465909	0.709416	1	0.714286	0.097403	0.188312	0.053659	0.043902	0.001626	0.001623	0.279221	0.599026	0.805195	1	0.012987	0.238636	0.363636	0.456169	0.965909	0.035714	0.206169	0.308442	0.491883	0.988636	0.452922	0.360976	0.01461	0.232143	0.464286	0.668831	0.998377	0.48539
0.390805	0.329502	0.279693	0.2	0.257692	0.176923	0.019157	0.256705	0.521073	0.789272	1	0.007663	0.295019	0.544061	0.785441	0.965517	0.003831	0.206897	0.436782	0.643678	0.996169	0.452107	0.164751	0.383142	0.05	0.065385	0.011538	0.003831	0.344828	0.670498	0.816092	1	0.122605	0.172414	0.318008	0.643678	0.704981	0.015326	0.229885	0.394636	0.555556	0.992337	0.40613	0.4	0.02682	0.214559	0.436782	0.609195	0.969349	0.360153
0.47619	0.222222	0.301587	0.177419	0.403226	0.064516	0.031746	0.190476	0.428571	0.714286	0.952381	0.047619	0.253968	0.555556	0.809524	1	0.015873	0.222222	0.412698	0.68254	0.904762	0.142857	0	0.857143	0	0.129032	0	0.015873	0.031746	0.15873	0.619048	1	0	0	0	0	0	0.047619	0.269841	0.492063	0.730159	0.952381	0.31746	0.451613	0.047619	0.333333	0.460317	0.730159	0.904762	0.222222
0.37051	0.321361	0.308129	0.210227	0.263258	0.193182	0.005671	0.272212	0.533081	0.754253	0.996219	0.003781	0.258979	0.489603	0.727788	1	0.00189	0.20794	0.47259	0.746692	0.99811	0.451796	0.177694	0.37051	0.087121	0.081439	0.001894	0.00189	0.336484	0.534972	0.786389	0.994329	0.069943	0.440454	0.759924	0.858223	1	0.013233	0.181474	0.325142	0.565217	0.931947	0.531191	0.390152	0.009452	0.221172	0.406427	0.708885	0.99811	0.342155
0.331169	0.383117	0.285714	0.30719	0.20915	0.24183	0.038961	0.253247	0.506494	0.75974	1	0.012987	0.266234	0.551948	0.772727	0.987013	0.006494	0.168831	0.402597	0.655844	0.993506	0.454545	0.142857	0.402597	0.091503	0.078431	0.013072	0.006494	0.233766	0.584416	0.772727	1	0.012987	0.038961	0.337662	0.727273	0.909091	0.097403	0.285714	0.435065	0.636364	0.987013	0.474026	0.398693	0.006494	0.207792	0.428571	0.714286	0.993506	0.409091
0.353646	0.328671	0.317682	0.238	0.229	0.198	0.008991	0.238761	0.481518	0.728272	1	0.001998	0.265734	0.511489	0.759241	0.995005	0.000999	0.234765	0.501499	0.737263	0.999001	0.458541	0.217782	0.323676	0.078	0.068	0.008	0.000999	0.257742	0.460539	0.696304	1	0.021978	0.317682	0.54046	0.751249	0.999001	0.007992	0.201798	0.585415	0.783217	0.989011	0.527473	0.36	0.002997	0.258741	0.548452	0.766234	0.998002	0.36963
0.369444	0.277778	0.352778	0.189415	0.261838	0.222841	0.005556	0.280556	0.508333	0.766667	0.997222	0.011111	0.191667	0.461111	0.741667	0.983333	0.002778	0.263889	0.505556	0.730556	1	0.313889	0.108333	0.577778	0.044568	0.10585	0.005571	0.002778	0.152778	0.333333	0.616667	1	0.005556	0.072222	0.169444	0.261111	0.341667	0.022222	0.433333	0.644444	0.816667	0.994444	0.583333	0.37883	0.008333	0.252778	0.455556	0.694444	0.994444	0.291667
0.304239	0.448878	0.246883	0.2275	0.1525	0.2275	0.007481	0.304239	0.551122	0.775561	0.997506	0.009975	0.206983	0.438903	0.683292	0.985037	0.002494	0.244389	0.526185	0.795511	1	0.551122	0.084788	0.36409	0.055	0.075	0.01	0.002494	0.184539	0.531172	0.733167	1	0.029925	0.077307	0.798005	0.860349	0.937656	0.054863	0.289277	0.389027	0.665835	0.992519	0.553616	0.34	0.014963	0.256858	0.53616	0.700748	0.985037	0.428928
0.325472	0.377358	0.29717	0.241706	0.189573	0.2891	0.028302	0.339623	0.589623	0.759434	1	0.009434	0.193396	0.410377	0.754717	0.995283	0.004717	0.179245	0.481132	0.693396	0.966981	0.580189	0.226415	0.193396	0.085308	0.066351	0	0.004717	0.188679	0.542453	0.778302	1	0.051887	0.283019	0.367925	0.811321	0.886792	0.014151	0.240566	0.415094	0.679245	0.79717	0.448113	0.388626	0.014151	0.283019	0.617925	0.806604	0.966981	0.377358
0.378049	0.292683	0.329268	0.259259	0.209877	0.160494	0.04878	0.256098	0.487805	0.695122	0.95122	0.060976	0.146341	0.463415	0.792683	0.97561	0.012195	0.195122	0.47561	0.768293	1	0.353659	0.304878	0.341463	0.098765	0.074074	0	0.012195	0.329268	0.560976	0.829268	1	0.036585	0.268293	0.585366	0.658537	0.804878	0.121951	0.195122	0.426829	0.512195	0.939024	0.414634	0.518519	0.036585	0.158537	0.463415	0.646341	0.963415	0.304878
0.416404	0.343849	0.239748	0.262658	0.158228	0.199367	0.028391	0.277603	0.536278	0.760252	1	0.006309	0.201893	0.460568	0.769716	0.993691	0.003155	0.246057	0.44164	0.665615	0.921136	0.637224	0.135647	0.227129	0.056962	0.063291	0	0.003155	0.176656	0.495268	0.77918	1	0.15142	0.242902	0.353312	0.85489	0.940063	0.072555	0.328076	0.523659	0.624606	0.842271	0.274448	0.322785	0.044164	0.249211	0.378549	0.599369	0.917981	0.353312
0.352941	0.333333	0.313725	0.230263	0.256579	0.243421	0.013072	0.254902	0.496732	0.751634	0.986928	0.03268	0.169935	0.339869	0.627451	0.993464	0.006536	0.359477	0.588235	0.79085	1	0.640523	0.176471	0.183007	0.052632	0.052632	0.013158	0.006536	0.169935	0.333333	0.575163	1	0.117647	0.503268	0.764706	0.810458	0.96732	0.019608	0.529412	0.633987	0.856209	0.901961	0.392157	0.394737	0.019608	0.267974	0.431373	0.718954	0.954248	0.339869
0.380952	0.306122	0.312925	0.19863	0.239726	0.191781	0.013605	0.340136	0.591837	0.829932	0.972789	0.054422	0.190476	0.401361	0.659864	1	0.006803	0.210884	0.469388	0.70068	0.952381	0.37415	0.312925	0.312925	0.089041	0.047945	0.034247	0.006803	0.251701	0.435374	0.659864	1	0.020408	0.163265	0.367347	0.707483	0.809524	0.027211	0.52381	0.612245	0.897959	0.979592	0.455782	0.369863	0.027211	0.210884	0.408163	0.680272	0.979592	0.272109
0.418367	0.340136	0.241497	0.279863	0.221843	0.177474	0.013605	0.248299	0.527211	0.772109	1	0.006803	0.261905	0.486395	0.714286	0.982993	0.003401	0.207483	0.455782	0.738095	0.962585	0.612245	0.20068	0.187075	0.081911	0.054608	0.006826	0.003401	0.261905	0.496599	0.663265	1	0.020408	0.285714	0.639456	0.812925	0.931973	0.013605	0.183673	0.336735	0.843537	0.986395	0.346939	0.327645	0.027211	0.241497	0.557823	0.758503	0.962585	0.380952
0.313152	0.402923	0.283925	0.225941	0.202929	0.225941	0.010438	0.367432	0.551148	0.755741	1	0.004175	0.177453	0.394572	0.720251	0.997912	0.002088	0.302714	0.51357	0.762004	0.991649	0.60334	0.14405	0.25261	0.054393	0.054393	0	0.002088	0.254697	0.507307	0.764092	1	0.068894	0.411273	0.584551	0.843424	0.983299	0.010438	0.179541	0.425887	0.638831	0.956159	0.511482	0.292887	0.008351	0.160752	0.384134	0.659708	0.987474	0.413361
0.325815	0.338346	0.33584	0.202008	0.224592	0.252196	0.002506	0.261905	0.498747	0.740602	0.997494	0.005013	0.244361	0.503759	0.759398	0.998747	0.001253	0.236842	0.486216	0.725564	1	0.461153	0.245614	0.293233	0.097867	0.055207	0.002509	0.001253	0.230576	0.461153	0.73183	1	0.038847	0.201754	0.421053	0.813283	0.997494	0.006266	0.315789	0.538847	0.703008	0.989975	0.558897	0.393977	0.003759	0.266917	0.477444	0.743108	0.996241	0.337093
0.309859	0.330986	0.359155	0.212766	0.241135	0.269504	0.042254	0.274648	0.471831	0.676056	0.957746	0.021127	0.197183	0.5	0.774648	0.985915	0.007042	0.253521	0.492958	0.760563	1	0.408451	0.309859	0.28169	0.148936	0.06383	0.007092	0.007042	0.211268	0.549296	0.704225	1	0.225352	0.471831	0.619718	0.830986	0.992958	0.06338	0.147887	0.28169	0.352113	0.922535	0.464789	0.411348	0.014085	0.253521	0.521127	0.795775	0.992958	0.323944
0.315855	0.314607	0.369538	0.16625	0.25625	0.2475	0.006242	0.282147	0.526841	0.762797	0.998752	0.004994	0.23221	0.478152	0.736579	1	0.001248	0.230961	0.483146	0.745318	0.997503	0.475655	0.227216	0.297129	0.08875	0.05875	0.00625	0.001248	0.214732	0.453184	0.742821	1	0.03995	0.173533	0.414482	0.805243	0.997503	0.006242	0.343321	0.569288	0.732834	0.991261	0.570537	0.395	0.003745	0.260924	0.469413	0.736579	0.997503	0.333333
0.388158	0.328947	0.282895	0.178808	0.245033	0.198675	0.019737	0.328947	0.447368	0.690789	0.973684	0.065789	0.236842	0.559211	0.736842	1	0.006579	0.151316	0.5	0.789474	0.986842	0.328947	0.282895	0.388158	0.112583	0.072848	0.019868	0.006579	0.171053	0.578947	0.763158	1	0.052632	0.276316	0.638158	0.901316	0.993421	0.026316	0.296053	0.394737	0.493421	0.835526	0.401316	0.490066	0.026316	0.217105	0.539474	0.743421	0.980263	0.361842
0.370871	0.333333	0.295796	0.245113	0.21203	0.209023	0.004505	0.243243	0.496997	0.750751	0.998498	0.006006	0.192192	0.441441	0.734234	0.992492	0.001502	0.325826	0.533033	0.749249	1	0.509009	0.124625	0.366366	0.039098	0.07218	0.009023	0.001502	0.13964	0.34985	0.737237	1	0.024024	0.405405	0.569069	0.684685	0.795796	0.013514	0.373874	0.558559	0.812312	0.947447	0.495495	0.345865	0.006006	0.301802	0.483483	0.726727	0.992492	0.34985
0.402299	0.298851	0.298851	0.242775	0.219653	0.202312	0.017241	0.281609	0.494253	0.787356	0.988506	0.011494	0.229885	0.528736	0.735632	1	0.005747	0.218391	0.431034	0.695402	0.994253	0.333333	0.08046	0.586207	0.034682	0.092486	0	0.005747	0.08046	0.402299	0.666667	1	0.413793	0.425287	0.448276	0.482759	0.522989	0.12069	0.275862	0.591954	0.804598	0.971264	0.442529	0.462428	0.04023	0.252874	0.505747	0.718391	0.971264	0.298851
0.333333	0.347222	0.319444	0.230769	0.195804	0.244755	0.048611	0.3125	0.541667	0.770833	1	0.013889	0.215278	0.5	0.673611	0.979167	0.006944	0.173611	0.479167	0.701389	0.909722	0.604167	0.277778	0.118056	0.125874	0.041958	0	0.006944	0.173611	0.513889	0.8125	1	0.236111	0.319444	0.486111	0.638889	0.909722	0.0625	0.083333	0.201389	0.75	0.784722	0.416667	0.363636	0.034722	0.194444	0.423611	0.645833	0.923611	0.354167
0.376923	0.269231	0.353846	0.185328	0.285714	0.204633	0.007692	0.219231	0.461538	0.715385	0.992308	0.015385	0.273077	0.526923	0.753846	1	0.003846	0.265385	0.511538	0.75	0.980769	0.25	0.065385	0.684615	0.019305	0.104247	0.011583	0.003846	0.284615	0.696154	0.823077	1	0.711538	0.753846	0.792308	0.807692	0.919231	0.015385	0.207692	0.411538	0.603846	0.984615	0.492308	0.416988	0.011538	0.253846	0.488462	0.734615	0.965385	0.273077
0.281893	0.465021	0.253086	0.226804	0.152577	0.249485	0.00823	0.240741	0.419753	0.769547	0.995885	0.004115	0.271605	0.549383	0.746914	1	0.002058	0.211934	0.471193	0.734568	0.979424	0.633745	0.158436	0.207819	0.061856	0.065979	0	0.002058	0.251029	0.567901	0.736626	1	0.004115	0.179012	0.366255	0.465021	0.979424	0.13786	0.290123	0.487654	0.790123	0.950617	0.580247	0.247423	0.006173	0.403292	0.611111	0.771605	0.979424	0.465021
0.44	0.261818	0.298182	0.229927	0.226277	0.171533	0.018182	0.152727	0.370909	0.694545	1	0.007273	0.367273	0.534545	0.781818	0.945455	0.003636	0.345455	0.538182	0.745455	0.985455	0.407273	0.109091	0.483636	0.069343	0.054745	0.00365	0.003636	0.370909	0.64	0.829091	1	0.283636	0.36	0.538182	0.654545	0.927273	0.032727	0.149091	0.403636	0.596364	0.992727	0.421818	0.386861	0.014545	0.396364	0.549091	0.741818	0.996364	0.298182
0.341818	0.298182	0.36	0.193078	0.271403	0.214936	0.003636	0.267273	0.512727	0.769091	1	0.012727	0.201818	0.445455	0.66	0.996364	0.001818	0.292727	0.529091	0.778182	0.992727	0.425455	0.085455	0.489091	0.041894	0.081967	0.001821	0.001818	0.256364	0.427273	0.650909	1	0.005455	0.214545	0.34	0.534545	0.612727	0.04	0.309091	0.643636	0.807273	0.996364	0.572727	0.404372	0.007273	0.232727	0.529091	0.730909	0.996364	0.336364
0.337963	0.354167	0.30787	0.25522	0.206497	0.222738	0.020833	0.256944	0.5	0.777778	1	0.00463	0.219907	0.488426	0.726852	0.997685	0.002315	0.268519	0.50463	0.715278	0.99537	0.335648	0.150463	0.513889	0.064965	0.092807	0.009281	0.002315	0.206019	0.497685	0.810185	1	0.048611	0.284722	0.50463	0.928241	0.99537	0.018519	0.263889	0.481481	0.715278	0.907407	0.571759	0.37587	0.013889	0.252315	0.456019	0.69213	0.99537	0.358796
0.389937	0.352201	0.257862	0.291139	0.208861	0.177215	0.018868	0.238994	0.45283	0.672956	1	0.012579	0.220126	0.54717	0.786164	0.949686	0.006289	0.251572	0.465409	0.754717	0.981132	0.36478	0.301887	0.333333	0.094937	0.06962	0.018987	0.006289	0.132075	0.440252	0.528302	1	0.031447	0.427673	0.792453	0.899371	0.987421	0.125786	0.27044	0.371069	0.63522	0.880503	0.421384	0.455696	0.044025	0.301887	0.566038	0.779874	0.981132	0.320755
0.333797	0.358832	0.307371	0.236769	0.192201	0.218663	0.004172	0.194715	0.458971	0.732962	0.997218	0.006954	0.260083	0.521558	0.755216	1	0.001391	0.2879	0.50904	0.752434	0.993046	0.381085	0.155772	0.463143	0.054318	0.090529	0.001393	0.001391	0.235049	0.499305	0.713491	1	0.004172	0.299026	0.478442	0.564673	0.958275	0.022253	0.21975	0.495132	0.781641	0.993046	0.561892	0.342618	0.005563	0.301808	0.522949	0.751043	0.993046	0.371349
0.36534	0.393443	0.241218	0.248535	0.173505	0.203986	0.004684	0.277518	0.514052	0.74356	0.998829	0.002342	0.208431	0.429742	0.713115	0.991803	0.001171	0.272834	0.537471	0.797424	1	0.586651	0.118267	0.295082	0.059789	0.071512	0.008206	0.001171	0.201405	0.409836	0.668618	1	0.016393	0.144028	0.377049	0.567916	0.980094	0.070258	0.482436	0.741218	0.855972	0.996487	0.352459	0.361079	0.016393	0.192037	0.47541	0.795082	0.994145	0.400468
0.37395	0.380952	0.245098	0.304348	0.165498	0.178121	0.007003	0.271709	0.528011	0.80112	1	0.002801	0.256303	0.522409	0.780112	0.997199	0.001401	0.208683	0.418768	0.64986	0.957983	0.509804	0.121849	0.368347	0.040673	0.057504	0.007013	0.001401	0.292717	0.670868	0.872549	1	0.060224	0.264706	0.414566	0.539216	0.642857	0.004202	0.190476	0.406162	0.64986	0.757703	0.487395	0.350631	0.004202	0.229692	0.441176	0.654062	0.990196	0.389356
0.368056	0.361111	0.270833	0.265734	0.20979	0.174825	0.020833	0.256944	0.534722	0.736111	0.965278	0.041667	0.201389	0.368056	0.597222	1	0.006944	0.388889	0.611111	0.833333	0.993056	0.631944	0.1875	0.180556	0.062937	0.062937	0.006993	0.006944	0.166667	0.326389	0.513889	1	0.131944	0.548611	0.805556	0.875	0.923611	0.027778	0.5625	0.666667	0.9375	0.986111	0.409722	0.405594	0.027778	0.284722	0.4375	0.729167	0.979167	0.375
0.396694	0.272727	0.330579	0.15	0.258333	0.216667	0.041322	0.256198	0.471074	0.694215	1	0.016529	0.347107	0.495868	0.801653	0.975207	0.008264	0.181818	0.429752	0.710744	0.983471	0.38843	0.272727	0.338843	0.1	0.083333	0.016667	0.008264	0.289256	0.471074	0.818182	1	0.033058	0.297521	0.421488	0.53719	0.975207	0.132231	0.206612	0.578512	0.68595	0.892562	0.446281	0.416667	0.033058	0.214876	0.487603	0.669421	0.966942	0.297521
0.375	0.367647	0.257353	0.281481	0.177778	0.2	0.022059	0.205882	0.389706	0.654412	0.992647	0.036765	0.235294	0.558824	0.816176	1	0.007353	0.286765	0.477941	0.698529	0.948529	0.316176	0.007353	0.676471	0.014815	0.074074	0	0.007353	0.176471	0.647059	0.911765	1	0.977941	0.977941	0.977941	0.977941	0.977941	0.058824	0.272059	0.441176	0.683824	0.867647	0.411765	0.459259	0.029412	0.308824	0.492647	0.691176	0.926471	0.352941
0.394089	0.37931	0.226601	0.331683	0.158416	0.153465	0.009852	0.325123	0.605911	0.788177	1	0.029557	0.251232	0.487685	0.724138	0.970443	0.004926	0.142857	0.344828	0.546798	0.995074	0.334975	0.251232	0.413793	0.039604	0.059406	0.019802	0.004926	0.231527	0.748768	0.842365	1	0.044335	0.37931	0.44335	0.517241	0.975369	0.098522	0.216749	0.600985	0.704433	0.985222	0.344828	0.376238	0.044335	0.192118	0.369458	0.527094	0.965517	0.37931
0.355789	0.322105	0.322105	0.202532	0.21097	0.225738	0.012632	0.256842	0.425263	0.648421	0.997895	0.004211	0.261053	0.616842	0.829474	1	0.002105	0.214737	0.507368	0.745263	0.983158	0.456842	0.168421	0.374737	0.07173	0.037975	0	0.002105	0.208421	0.646316	0.831579	1	0.056842	0.635789	0.749474	0.863158	0.972632	0.008421	0.271579	0.366316	0.458947	0.593684	0.477895	0.434599	0.012632	0.267368	0.585263	0.785263	0.978947	0.351579
0.293919	0.412162	0.293919	0.237288	0.166102	0.230508	0.010135	0.182432	0.5	0.780405	1	0.006757	0.243243	0.513514	0.72973	0.996622	0.003378	0.280405	0.476351	0.712838	0.97973	0.415541	0.162162	0.422297	0.047458	0.074576	0	0.003378	0.138514	0.425676	0.692568	1	0.226351	0.388514	0.456081	0.641892	0.726351	0.081081	0.283784	0.540541	0.831081	0.989865	0.533784	0.40678	0.013514	0.263514	0.489865	0.679054	0.983108	0.493243
0.323308	0.390977	0.285714	0.242938	0.190207	0.220339	0.005639	0.266917	0.537594	0.802632	0.99812	0.003759	0.25188	0.520677	0.755639	0.996241	0.00188	0.214286	0.43985	0.648496	1	0.479323	0.06015	0.460526	0.016949	0.073446	0.00565	0.00188	0.257519	0.612782	0.843985	1	0.058271	0.071429	0.191729	0.389098	0.639098	0.005639	0.31203	0.477444	0.644737	0.994361	0.488722	0.308851	0.007519	0.219925	0.43609	0.62782	0.992481	0.413534
0.330935	0.359712	0.309353	0.202899	0.217391	0.23913	0.014388	0.302158	0.503597	0.827338	0.985612	0.028777	0.280576	0.532374	0.719424	1	0.007194	0.194245	0.410072	0.647482	0.992806	0.345324	0.309353	0.345324	0.123188	0.07971	0.007246	0.007194	0.230216	0.453237	0.697842	1	0.021583	0.258993	0.489209	0.71223	0.992806	0.05036	0.129496	0.539568	0.798561	0.913669	0.539568	0.463768	0.021583	0.23741	0.489209	0.726619	0.978417	0.467626
0.405882	0.314706	0.279412	0.225331	0.200295	0.181149	0.005882	0.158824	0.438235	0.732353	1	0.002941	0.289706	0.514706	0.760294	0.992647	0.001471	0.364706	0.557353	0.744118	0.998529	0.491176	0.127941	0.380882	0.045655	0.07511	0.007364	0.001471	0.183824	0.377941	0.739706	1	0.126471	0.426471	0.577941	0.714706	0.926471	0.004412	0.348529	0.529412	0.801471	0.997059	0.427941	0.324006	0.007353	0.385294	0.545588	0.738235	0.997059	0.351471
0.34205	0.354603	0.303347	0.237049	0.206698	0.21978	0.002615	0.239017	0.496339	0.745293	0.999477	0.001046	0.289749	0.526674	0.758891	1	0.000523	0.221757	0.462343	0.748954	0.998431	0.492678	0.106695	0.400628	0.048666	0.081109	0.002616	0.000523	0.312762	0.535565	0.737448	1	0.002615	0.244247	0.401151	0.573745	0.98431	0.018305	0.194561	0.5	0.804916	0.996339	0.529812	0.376766	0.001569	0.247385	0.508368	0.749477	0.998431	0.379184
0.336788	0.357513	0.305699	0.270833	0.25	0.223958	0.015544	0.202073	0.476684	0.746114	0.994819	0.010363	0.243523	0.466321	0.725389	1	0.005181	0.274611	0.497409	0.735751	0.927461	0.440415	0.450777	0.108808	0.125	0.03125	0	0.005181	0.238342	0.590674	0.839378	1	0.020725	0.331606	0.497409	0.678756	0.932642	0.093264	0.11399	0.248705	0.274611	0.715026	0.440415	0.479167	0.025907	0.274611	0.476684	0.704663	0.937824	0.378238
0.353333	0.295556	0.351111	0.207127	0.25167	0.207127	0.006667	0.217778	0.475556	0.755556	0.971111	0.008889	0.3	0.522222	0.76	0.997778	0.002222	0.222222	0.486667	0.728889	1	0.351111	0.08	0.568889	0.028953	0.100223	0.002227	0.002222	0.251111	0.533333	0.784444	1	0.222222	0.295556	0.477778	0.544444	0.626667	0.004444	0.184444	0.504444	0.755556	0.96	0.54	0.4098	0.004444	0.264444	0.488889	0.677778	0.995556	0.333333
0.309255	0.496614	0.194131	0.273756	0.147059	0.149321	0.004515	0.300226	0.469526	0.733634	0.997743	0.015801	0.185102	0.544018	0.790068	1	0.002257	0.291196	0.478555	0.604966	0.972912	0.724605	0.065463	0.209932	0.024887	0.052036	0.002262	0.002257	0.185102	0.532731	0.785553	1	0.34763	0.361174	0.397291	0.44921	0.896163	0.020316	0.275395	0.476298	0.593679	0.936795	0.458239	0.38009	0.024831	0.370203	0.602709	0.760722	0.993228	0.48307
0.375723	0.323699	0.300578	0.209302	0.226744	0.186047	0.011561	0.283237	0.462428	0.716763	1	0.075145	0.242775	0.554913	0.797688	0.976879	0.00578	0.225434	0.468208	0.728324	0.99422	0.352601	0.254335	0.393064	0.098837	0.063953	0.017442	0.00578	0.190751	0.520231	0.693642	1	0.023121	0.219653	0.531792	0.774566	0.855491	0.052023	0.294798	0.393064	0.710983	0.99422	0.346821	0.418605	0.028902	0.184971	0.479769	0.705202	0.901734	0.33526
0.373874	0.382883	0.243243	0.312217	0.18552	0.171946	0.013514	0.225225	0.45045	0.725225	0.986486	0.009009	0.265766	0.472973	0.752252	1	0.004505	0.171171	0.558559	0.738739	0.936937	0.54955	0.130631	0.31982	0.072398	0.072398	0	0.004505	0.256757	0.405405	0.68018	1	0.018018	0.072072	0.563063	0.702703	0.878378	0.094595	0.193694	0.612613	0.828829	0.990991	0.5	0.352941	0.018018	0.31982	0.504505	0.738739	0.981982	0.396396
0.408696	0.295652	0.295652	0.280702	0.184211	0.175439	0.026087	0.147826	0.356522	0.66087	1	0.017391	0.226087	0.573913	0.8	0.973913	0.008696	0.365217	0.530435	0.791304	0.982609	0.530435	0.382609	0.086957	0.096491	0.026316	0.026316	0.008696	0.130435	0.382609	0.678261	1	0.321739	0.443478	0.582609	0.808696	0.973913	0.234783	0.243478	0.269565	0.286957	0.947826	0.443478	0.22807	0.234783	0.426087	0.556522	0.826087	0.982609	0.313043
0.458993	0.316547	0.22446	0.244957	0.197406	0.161383	0.01295	0.351079	0.509353	0.776978	1	0.002878	0.230216	0.648921	0.808633	0.995683	0.001439	0.156835	0.332374	0.6	0.997122	0.447482	0.094964	0.457554	0.036023	0.056196	0.004323	0.001439	0.230216	0.72518	0.85036	1	0.004317	0.048921	0.146763	0.305036	0.789928	0.020144	0.374101	0.489209	0.602878	0.968345	0.261871	0.268012	0.005755	0.128058	0.277698	0.666187	0.905036	0.339568
0.344	0.392	0.264	0.290323	0.145161	0.217742	0.136	0.312	0.536	0.728	0.992	0.016	0.208	0.448	0.736	1	0.008	0.176	0.456	0.72	0.96	0.392	0.184	0.424	0.064516	0.080645	0	0.008	0.24	0.392	0.72	1	0.04	0.288	0.336	0.456	0.768	0.096	0.208	0.6	0.848	0.96	0.52	0.274194	0.032	0.2	0.456	0.656	0.96	0.456
0.351598	0.410959	0.237443	0.284404	0.169725	0.155963	0.027397	0.237443	0.479452	0.721461	1	0.009132	0.242009	0.56621	0.780822	0.990868	0.004566	0.26484	0.474886	0.643836	0.876712	0.447489	0.077626	0.474886	0.045872	0.073394	0	0.004566	0.287671	0.561644	0.780822	1	0.045662	0.639269	0.666667	0.694064	0.744292	0.086758	0.219178	0.401826	0.60274	0.917808	0.420091	0.40367	0.050228	0.269406	0.520548	0.675799	0.90411	0.369863
0.302059	0.411899	0.286041	0.254587	0.176606	0.229358	0.011442	0.276888	0.530892	0.771167	0.995423	0.006865	0.244851	0.496568	0.727689	1	0.002288	0.221968	0.471396	0.741419	0.993135	0.386728	0.128146	0.485126	0.055046	0.082569	0	0.002288	0.361556	0.560641	0.773455	1	0.402746	0.576659	0.695652	0.8627	0.995423	0.02746	0.16476	0.336384	0.643021	0.90389	0.601831	0.334862	0.006865	0.240275	0.505721	0.729977	0.990847	0.475973
0.279441	0.382236	0.338323	0.212787	0.202797	0.261738	0.00499	0.213573	0.44012	0.725549	0.99501	0.001996	0.280439	0.520958	0.766467	1	0.000998	0.238523	0.506986	0.737525	0.992016	0.468064	0.259481	0.272455	0.094905	0.050949	0.004995	0.000998	0.316367	0.528942	0.785429	1	0.003992	0.391218	0.615768	0.842315	0.97505	0.007984	0.091816	0.224551	0.570858	0.868263	0.632735	0.351648	0.003992	0.272455	0.541916	0.773453	0.992016	0.399202
0.397436	0.333333	0.269231	0.245161	0.141935	0.180645	0.019231	0.205128	0.416667	0.839744	0.987179	0.012821	0.224359	0.532051	0.724359	0.99359	0.00641	0.282051	0.519231	0.666667	1	0.294872	0.115385	0.589744	0.03871	0.103226	0	0.00641	0.173077	0.448718	0.673077	1	0.467949	0.487179	0.660256	0.775641	0.807692	0.038462	0.275641	0.429487	0.833333	0.987179	0.442308	0.348387	0.089744	0.384615	0.551282	0.711538	0.980769	0.346154
0.334577	0.349502	0.31592	0.225405	0.224159	0.227895	0.007463	0.253731	0.493781	0.727612	1	0.004975	0.254975	0.504975	0.748756	0.987562	0.001244	0.235075	0.492537	0.762438	0.998756	0.466418	0.24005	0.293532	0.103362	0.053549	0.003736	0.001244	0.210199	0.46393	0.75	1	0.038557	0.207711	0.424129	0.794776	0.998756	0.006219	0.323383	0.54602	0.705224	0.992537	0.56592	0.400996	0.003731	0.263682	0.477612	0.737562	0.998756	0.369403
0.316384	0.384181	0.299435	0.249292	0.192635	0.209632	0.022599	0.268362	0.502825	0.731638	0.99435	0.00565	0.189266	0.480226	0.779661	0.997175	0.002825	0.265537	0.516949	0.734463	1	0.491525	0.163842	0.344633	0.073654	0.050992	0.011331	0.002825	0.29661	0.573446	0.841808	1	0.09887	0.305085	0.514124	0.607345	0.988701	0.025424	0.180791	0.364407	0.686441	0.943503	0.50565	0.402266	0.022599	0.20339	0.403955	0.672316	0.988701	0.403955
0.356164	0.356164	0.287671	0.236111	0.277778	0.125	0.013699	0.136986	0.410959	0.630137	0.972603	0.205479	0.369863	0.671233	0.808219	0.958904	0.041096	0.164384	0.383562	0.60274	1	0.39726	0.30137	0.30137	0.152778	0.069444	0.013889	0.013699	0.219178	0.438356	0.589041	1	0.041096	0.39726	0.671233	0.739726	0.986301	0.082192	0.136986	0.328767	0.821918	0.90411	0.369863	0.472222	0.054795	0.246575	0.493151	0.684932	0.958904	0.342466
0.427332	0.264642	0.308026	0.230435	0.263043	0.143478	0.013015	0.225597	0.442516	0.698482	1	0.017354	0.249458	0.590022	0.770065	0.993492	0.002169	0.27115	0.524946	0.767896	0.997831	0.409978	0.106291	0.483731	0.043478	0.121739	0.008696	0.002169	0.18872	0.403471	0.687636	1	0.004338	0.498915	0.691974	0.839479	0.97397	0.032538	0.299349	0.4859	0.735358	0.997831	0.440347	0.36087	0.004338	0.444685	0.633406	0.819957	0.995662	0.279826
0.2822	0.441389	0.276411	0.223188	0.153623	0.218841	0.01013	0.199711	0.435601	0.736614	0.997106	0.002894	0.267728	0.554269	0.778582	1	0.001447	0.250362	0.47178	0.685962	0.998553	0.603473	0.131693	0.264834	0.053623	0.065217	0.001449	0.001447	0.256151	0.578871	0.778582	1	0.005789	0.195369	0.273517	0.397974	0.985528	0.053546	0.290883	0.494935	0.6411	0.991317	0.513748	0.362319	0.007236	0.329957	0.541245	0.745297	0.991317	0.421129
0.324138	0.441379	0.234483	0.307958	0.16609	0.176471	0.010345	0.262069	0.524138	0.8	1	0.013793	0.303448	0.551724	0.793103	0.996552	0.003448	0.127586	0.372414	0.617241	0.934483	0.593103	0.310345	0.096552	0.100346	0.031142	0.00346	0.003448	0.324138	0.537931	0.775862	1	0.013793	0.12069	0.337931	0.603448	0.937931	0.224138	0.244828	0.834483	0.872414	0.931034	0.468966	0.32526	0.013793	0.186207	0.431034	0.62069	0.97931	0.472414
0.301691	0.511053	0.187256	0.266927	0.130208	0.154948	0.002601	0.231469	0.477243	0.708713	1	0.005202	0.240572	0.564369	0.804941	0.9987	0.0013	0.284785	0.452536	0.635891	0.958388	0.629389	0.140442	0.230169	0.061198	0.040365	0.001302	0.0013	0.224967	0.511053	0.772432	1	0.044213	0.271782	0.392718	0.544863	0.702211	0.071521	0.351105	0.576073	0.829649	0.972692	0.405722	0.346354	0.003901	0.271782	0.474642	0.724317	0.976593	0.524057
0.337017	0.359116	0.303867	0.266667	0.194444	0.2	0.01105	0.259669	0.497238	0.756906	1	0.033149	0.20442	0.469613	0.745856	0.977901	0.005525	0.265193	0.464088	0.690608	0.98895	0.486188	0.425414	0.088398	0.138889	0.05	0.005556	0.005525	0.281768	0.502762	0.762431	1	0.016575	0.18232	0.375691	0.679558	0.895028	0.524862	0.58011	0.61326	0.961326	0.98895	0.508287	0.366667	0.016575	0.20442	0.425414	0.690608	0.98895	0.392265
0.438326	0.356828	0.204846	0.324503	0.183223	0.134658	0.006608	0.185022	0.453744	0.720264	0.997797	0.004405	0.251101	0.45815	0.737885	0.993392	0.002203	0.414097	0.610132	0.810573	1	0.464758	0.218062	0.317181	0.081678	0.081678	0.002208	0.002203	0.207048	0.440529	0.740088	1	0.048458	0.286344	0.513216	0.73348	0.991189	0.008811	0.253304	0.537445	0.757709	0.993392	0.433921	0.322296	0.008811	0.244493	0.484581	0.73348	0.993392	0.400881
0.254777	0.503185	0.242038	0.24359	0.115385	0.237179	0.095541	0.522293	0.687898	0.859873	0.993631	0.012739	0.203822	0.426752	0.707006	1	0.006369	0.178344	0.407643	0.605096	0.929936	0.66879	0.165605	0.165605	0.083333	0.057692	0.00641	0.006369	0.248408	0.426752	0.694268	1	0.044586	0.165605	0.229299	0.496815	0.917197	0.363057	0.66879	0.751592	0.840764	0.88535	0.426752	0.320513	0.025478	0.216561	0.44586	0.624204	0.929936	0.528662
0.372781	0.313609	0.313609	0.238095	0.244048	0.27381	0.017751	0.349112	0.568047	0.781065	1	0.011834	0.183432	0.372781	0.704142	0.994083	0.005917	0.189349	0.47929	0.692308	0.988166	0.502959	0.118343	0.378698	0.035714	0.059524	0	0.005917	0.230769	0.550296	0.852071	1	0.260355	0.284024	0.360947	0.390533	0.952663	0.017751	0.106509	0.532544	0.662722	0.757396	0.485207	0.369048	0.023669	0.153846	0.372781	0.615385	0.952663	0.325444
0.346405	0.366013	0.287582	0.243421	0.203947	0.236842	0.026144	0.313725	0.464052	0.751634	0.980392	0.013072	0.222222	0.477124	0.718954	1	0.006536	0.215686	0.535948	0.777778	0.973856	0.359477	0.30719	0.333333	0.125	0.046053	0.006579	0.006536	0.117647	0.503268	0.751634	1	0.026144	0.248366	0.614379	0.888889	0.986928	0.176471	0.326797	0.411765	0.647059	0.830065	0.392157	0.486842	0.03268	0.215686	0.535948	0.745098	0.973856	0.379085
0.366133	0.313501	0.320366	0.227064	0.263761	0.188073	0.006865	0.240275	0.498856	0.759725	0.990847	0.009153	0.228833	0.487414	0.734554	1	0.002288	0.267735	0.496568	0.73913	0.995423	0.402746	0.189931	0.407323	0.073394	0.082569	0.004587	0.002288	0.295195	0.517162	0.773455	1	0.100686	0.249428	0.489703	0.743707	0.935927	0.009153	0.196796	0.439359	0.681922	0.981693	0.544622	0.417431	0.009153	0.265446	0.487414	0.702517	0.995423	0.340961
0.39011	0.274725	0.335165	0.206612	0.267218	0.217631	0.005495	0.282967	0.519231	0.774725	0.997253	0.019231	0.241758	0.497253	0.695055	0.991758	0.002747	0.21978	0.478022	0.728022	1	0.543956	0.178571	0.277473	0.063361	0.052342	0.008264	0.002747	0.277473	0.480769	0.741758	1	0.076923	0.14011	0.667582	0.799451	0.994505	0.038462	0.228022	0.392857	0.722527	0.912088	0.453297	0.380165	0.016484	0.239011	0.510989	0.730769	0.986264	0.326923
0.355362	0.397756	0.246883	0.267166	0.168539	0.179775	0.013716	0.278055	0.586035	0.811721	1	0.002494	0.225686	0.498753	0.766833	0.993766	0.001247	0.23192	0.405237	0.620948	0.997506	0.490025	0.117207	0.392768	0.052434	0.082397	0.002497	0.001247	0.238155	0.567332	0.812968	1	0.125935	0.286783	0.413965	0.509975	0.845387	0.03616	0.256858	0.517456	0.682045	0.997506	0.4202	0.337079	0.004988	0.216958	0.395262	0.584788	0.976309	0.413965
0.337705	0.311475	0.35082	0.203947	0.223684	0.256579	0.009836	0.206557	0.488525	0.786885	0.996721	0.006557	0.262295	0.491803	0.718033	0.990164	0.003279	0.255738	0.498361	0.72459	1	0.468852	0.265574	0.265574	0.092105	0.052632	0	0.003279	0.229508	0.422951	0.704918	1	0.019672	0.2	0.459016	0.678689	0.816393	0.029508	0.35082	0.518033	0.885246	0.957377	0.534426	0.355263	0.022951	0.285246	0.491803	0.72459	0.983607	0.370492
0.347162	0.381368	0.27147	0.248361	0.182083	0.207575	0.002183	0.269287	0.502911	0.75837	1	0.002911	0.161572	0.413392	0.713246	0.996361	0.000728	0.385735	0.565502	0.77802	0.998544	0.518923	0.077147	0.40393	0.032775	0.085215	0.003642	0.000728	0.135371	0.342795	0.614265	1	0.03639	0.417031	0.458515	0.611354	0.954876	0.026929	0.47671	0.666667	0.835517	0.998544	0.45706	0.355426	0.004367	0.377729	0.55968	0.756186	0.998544	0.372635
0.384615	0.312821	0.302564	0.216495	0.21134	0.226804	0.015385	0.174359	0.461538	0.692308	1	0.010256	0.266667	0.482051	0.723077	0.989744	0.005128	0.246154	0.523077	0.758974	0.979487	0.425641	0.220513	0.353846	0.06701	0.06701	0.005155	0.005128	0.220513	0.558974	0.779487	1	0.158974	0.430769	0.651282	0.738462	0.979487	0.035897	0.235897	0.34359	0.523077	0.948718	0.492308	0.443299	0.046154	0.266667	0.502564	0.717949	0.979487	0.338462
0.336134	0.361345	0.302521	0.237288	0.220339	0.220339	0.042017	0.268908	0.596639	0.789916	0.991597	0.02521	0.226891	0.445378	0.731092	0.915966	0.008403	0.252101	0.403361	0.689076	1	0.512605	0.142857	0.344538	0.067797	0.084746	0	0.008403	0.310924	0.714286	0.840336	1	0.02521	0.117647	0.151261	0.184874	0.991597	0.226891	0.302521	0.478992	0.613445	0.705882	0.436975	0.491525	0.016807	0.176471	0.403361	0.705882	0.983193	0.302521
0.354839	0.387097	0.258065	0.206522	0.195652	0.25	0.021505	0.354839	0.666667	0.860215	1	0.032258	0.247312	0.44086	0.602151	0.924731	0.010753	0.172043	0.397849	0.612903	0.967742	0.569892	0.236559	0.193548	0.108696	0.086957	0	0.010753	0.215054	0.462366	0.752688	1	0.107527	0.150538	0.268817	0.376344	0.548387	0.602151	0.634409	0.688172	0.817204	0.967742	0.311828	0.326087	0.053763	0.182796	0.387097	0.473118	0.688172	0.408602
0.348659	0.409962	0.241379	0.292308	0.165385	0.176923	0.011494	0.245211	0.505747	0.766284	1	0.007663	0.226054	0.51341	0.770115	0.961686	0.003831	0.241379	0.409962	0.670498	0.977011	0.643678	0.291188	0.065134	0.169231	0.030769	0	0.003831	0.275862	0.505747	0.804598	1	0.015326	0.176245	0.337165	0.56705	0.992337	0.666667	0.697318	0.712644	0.770115	0.796935	0.498084	0.284615	0.049808	0.283525	0.452107	0.685824	0.984674	0.383142
0.386364	0.295455	0.318182	0.275862	0.218391	0.183908	0.045455	0.193182	0.454545	0.693182	1	0.022727	0.25	0.534091	0.75	0.988636	0.011364	0.227273	0.5	0.738636	0.977273	0.443182	0.443182	0.113636	0.103448	0.034483	0.011494	0.011364	0.193182	0.545455	0.727273	1	0.045455	0.204545	0.386364	0.5	0.829545	0.840909	0.852273	0.886364	0.909091	0.965909	0.386364	0.482759	0.068182	0.215909	0.477273	0.704545	0.909091	0.272727
0.281022	0.408759	0.310219	0.227771	0.202192	0.274056	0.002433	0.243309	0.489051	0.73236	1	0.004866	0.248175	0.515815	0.759124	0.995134	0.001217	0.244526	0.486618	0.738443	0.997567	0.458637	0.238443	0.30292	0.097442	0.053593	0.002436	0.001217	0.199513	0.469586	0.742092	1	0.037713	0.253041	0.409976	0.801703	0.997567	0.006083	0.312652	0.555961	0.710462	0.992701	0.564477	0.375152	0.00365	0.26764	0.491484	0.733577	0.997567	0.447689
0.415011	0.337748	0.247241	0.245575	0.181416	0.192478	0.006623	0.245033	0.509934	0.737307	1	0.004415	0.216336	0.467991	0.730684	0.971302	0.002208	0.291391	0.503311	0.788079	0.969095	0.529801	0.200883	0.269316	0.070796	0.061947	0	0.002208	0.214128	0.505519	0.706402	1	0.039735	0.233996	0.419426	0.757174	0.905077	0.013245	0.293598	0.549669	0.796909	0.958057	0.430464	0.327434	0.037528	0.258278	0.459161	0.750552	0.969095	0.355408
0.316731	0.338442	0.344828	0.19821	0.234015	0.240409	0.002554	0.236271	0.480204	0.716475	0.987229	0.003831	0.256705	0.514687	0.786718	1	0.001277	0.254151	0.500639	0.739464	0.998723	0.492976	0.149425	0.357599	0.063939	0.084399	0.002558	0.001277	0.206897	0.41507	0.744572	1	0.068966	0.305236	0.606641	0.795658	0.987229	0.019157	0.401022	0.547893	0.740741	0.974457	0.50447	0.363171	0.019157	0.293742	0.485313	0.749681	0.993614	0.355045
0.26025	0.499109	0.240642	0.233929	0.125	0.241071	0.017825	0.253119	0.474153	0.782531	1	0.00713	0.272727	0.520499	0.71836	0.998217	0.001783	0.226381	0.465241	0.787879	0.994652	0.705882	0.135472	0.158645	0.060714	0.053571	0.003571	0.001783	0.301248	0.527629	0.734403	1	0.131907	0.279857	0.547237	0.809269	0.894831	0.051693	0.160428	0.286988	0.782531	0.973262	0.568627	0.346429	0.01426	0.276292	0.515152	0.766488	0.998217	0.486631
0.348548	0.240664	0.410788	0.195833	0.316667	0.195833	0.008299	0.282158	0.514523	0.73029	1	0.020747	0.190871	0.585062	0.792531	0.983402	0.004149	0.224066	0.46473	0.717842	0.995851	0.352697	0.26971	0.377593	0.079167	0.054167	0.004167	0.004149	0.211618	0.456432	0.850622	1	0.033195	0.323651	0.39834	0.755187	0.975104	0.087137	0.19917	0.510373	0.680498	0.86722	0.53527	0.458333	0.020747	0.244813	0.551867	0.771784	0.975104	0.207469
0.425197	0.326772	0.248031	0.252964	0.209486	0.150198	0.007874	0.26378	0.507874	0.818898	1	0.023622	0.299213	0.551181	0.755906	0.996063	0.003937	0.177165	0.401575	0.574803	0.968504	0.472441	0.122047	0.405512	0.047431	0.079051	0.007905	0.003937	0.358268	0.673228	0.838583	1	0.047244	0.070866	0.42126	0.543307	0.582677	0.011811	0.204724	0.397638	0.649606	0.933071	0.385827	0.332016	0.035433	0.153543	0.34252	0.547244	0.968504	0.346457
0.37247	0.303644	0.323887	0.22027	0.240541	0.214865	0.004049	0.288799	0.54386	0.784076	1	0.005398	0.194332	0.450742	0.721997	0.995951	0.00135	0.245614	0.48583	0.735493	0.99865	0.411606	0.167341	0.421053	0.07973	0.078378	0.002703	0.00135	0.306343	0.489879	0.804318	0.99865	0.004049	0.17004	0.34278	0.900135	1	0.025641	0.268556	0.541161	0.678812	0.932524	0.51552	0.378378	0.005398	0.249663	0.466937	0.680162	0.99865	0.300945
0.376623	0.285714	0.337662	0.200521	0.265625	0.195312	0.005195	0.184416	0.418182	0.724675	1	0.023377	0.335065	0.522078	0.742857	0.98961	0.002597	0.212987	0.501299	0.753247	0.997403	0.371429	0.228571	0.4	0.088542	0.072917	0	0.002597	0.288312	0.480519	0.792208	1	0.01039	0.187013	0.387013	0.607792	0.994805	0.051948	0.238961	0.581818	0.768831	0.979221	0.602597	0.411458	0.01039	0.301299	0.509091	0.742857	0.997403	0.322078
0.284501	0.388535	0.326964	0.223404	0.210638	0.246809	0.006369	0.239915	0.494692	0.734607	0.985138	0.004246	0.2569	0.505308	0.753715	1	0.002123	0.235669	0.484076	0.7431	0.997877	0.392781	0.118896	0.488323	0.070213	0.112766	0.006383	0.002123	0.205945	0.526539	0.802548	1	0.048832	0.161359	0.473461	0.927813	0.997877	0.014862	0.278132	0.450106	0.66879	0.955414	0.55414	0.387234	0.008493	0.235669	0.435244	0.660297	0.995754	0.420382
0.441057	0.306911	0.252033	0.295316	0.203666	0.120163	0.012195	0.319106	0.591463	0.808943	1	0.004065	0.213415	0.473577	0.772358	0.997967	0.002033	0.191057	0.400407	0.581301	0.945122	0.593496	0.168699	0.237805	0.077393	0.077393	0	0.002033	0.231707	0.50813	0.794715	1	0.004065	0.189024	0.319106	0.581301	0.857724	0.046748	0.373984	0.520325	0.780488	0.989837	0.373984	0.321792	0.006098	0.150407	0.337398	0.573171	0.945122	0.357724
0.257692	0.498077	0.244231	0.22158	0.132948	0.204239	0.021154	0.280769	0.488462	0.676923	0.994231	0.003846	0.201923	0.492308	0.767308	1	0.001923	0.284615	0.513462	0.775	0.998077	0.675	0.130769	0.194231	0.05395	0.026975	0.011561	0.001923	0.213462	0.582692	0.763462	1	0.007692	0.321154	0.455769	0.901923	0.996154	0.063462	0.236538	0.373077	0.544231	0.990385	0.551923	0.308285	0.005769	0.278846	0.525	0.705769	0.998077	0.526923
0.33123	0.353312	0.315457	0.259494	0.177215	0.246835	0.012618	0.271293	0.520505	0.772871	0.990536	0.006309	0.176656	0.44795	0.694006	0.996845	0.003155	0.287066	0.514196	0.744479	1	0.403785	0.22082	0.375394	0.063291	0.063291	0	0.003155	0.157729	0.40694	0.637224	1	0.059937	0.208202	0.425868	0.782334	0.949527	0.097792	0.369085	0.574132	0.829653	0.987382	0.542587	0.316456	0.056782	0.239748	0.492114	0.722397	0.993691	0.394322
0.421053	0.294737	0.284211	0.255319	0.234043	0.170213	0.021053	0.315789	0.642105	0.821053	0.989474	0.052632	0.273684	0.452632	0.621053	0.957895	0.010526	0.157895	0.368421	0.578947	1	0.6	0.263158	0.136842	0.085106	0.06383	0	0.010526	0.294737	0.505263	0.8	1	0.094737	0.147368	0.252632	0.368421	0.557895	0.610526	0.631579	0.663158	0.694737	0.968421	0.336842	0.340426	0.042105	0.178947	0.389474	0.484211	0.968421	0.336842
0.372671	0.304348	0.322981	0.225	0.19375	0.25	0.018634	0.192547	0.42236	0.726708	1	0.012422	0.223602	0.496894	0.751553	0.987578	0.006211	0.279503	0.540373	0.745342	0.956522	0.428571	0.15528	0.416149	0.0625	0.0625	0	0.006211	0.130435	0.341615	0.677019	1	0.248447	0.279503	0.453416	0.490683	0.757764	0.024845	0.509317	0.614907	0.832298	0.937888	0.403727	0.425	0.031056	0.291925	0.540373	0.745342	0.956522	0.329193
0.416129	0.329032	0.254839	0.265372	0.229773	0.18123	0.016129	0.203226	0.419355	0.712903	1	0.006452	0.287097	0.548387	0.73871	0.996774	0.003226	0.283871	0.519355	0.758065	0.993548	0.63871	0.083871	0.277419	0.058252	0.071197	0	0.003226	0.316129	0.583871	0.8	1	0.012903	0.083871	0.53871	0.6	0.993548	0.096774	0.193548	0.267742	0.564516	0.906452	0.383871	0.407767	0.009677	0.306452	0.541935	0.777419	0.993548	0.341935
0.308355	0.391247	0.300398	0.248839	0.162575	0.246184	0.001989	0.28382	0.540451	0.780504	0.997347	0.001326	0.246684	0.465517	0.731432	0.998011	0.000663	0.232759	0.468833	0.736074	1	0.417109	0.288462	0.29443	0.105508	0.040478	0.001991	0.000663	0.210212	0.431034	0.756631	1	0.009947	0.145889	0.284483	0.418435	0.8687	0.554377	0.653183	0.737401	0.850796	0.998011	0.555703	0.353019	0.003316	0.232759	0.458886	0.695623	0.999337	0.403846
0.322275	0.393365	0.28436	0.242857	0.190476	0.252381	0.014218	0.227488	0.440758	0.720379	1	0.009479	0.274882	0.57346	0.805687	0.995261	0.004739	0.241706	0.436019	0.677725	0.919431	0.445498	0.43128	0.123223	0.128571	0.052381	0.004762	0.004739	0.2891	0.56872	0.838863	1	0.028436	0.317536	0.492891	0.677725	0.886256	0.080569	0.104265	0.236967	0.279621	0.971564	0.417062	0.447619	0.018957	0.241706	0.440758	0.663507	0.890995	0.407583
0.230352	0.574526	0.195122	0.192673	0.093623	0.217096	0.004065	0.275068	0.392954	0.659892	1	0.006775	0.257453	0.51897	0.789973	0.998645	0.001355	0.178862	0.501355	0.752033	0.99729	0.5271	0.071816	0.401084	0.033921	0.058345	0.006784	0.001355	0.228997	0.542005	0.764228	1	0.004065	0.163957	0.449864	0.674797	0.960705	0.009485	0.273713	0.375339	0.758808	0.99729	0.47832	0.306649	0.00542	0.254743	0.626016	0.817073	0.99729	0.50813
0.36646	0.291925	0.341615	0.199067	0.239502	0.244168	0.003106	0.248447	0.51087	0.729814	0.995342	0.004658	0.26087	0.490683	0.751553	1	0.001553	0.237578	0.495342	0.776398	0.998447	0.416149	0.231366	0.352484	0.088647	0.060653	0.007776	0.001553	0.23913	0.431677	0.703416	1	0.051242	0.190994	0.420807	0.902174	0.987578	0.003106	0.321429	0.621118	0.756211	0.993789	0.552795	0.382582	0.006211	0.273292	0.495342	0.753106	0.998447	0.296584
0.313433	0.447761	0.238806	0.227273	0.212121	0.19697	0.029851	0.343284	0.507463	0.850746	1	0.044776	0.19403	0.402985	0.686567	0.985075	0.014925	0.238806	0.462687	0.58209	0.910448	0.522388	0.343284	0.134328	0.151515	0.030303	0	0.014925	0.119403	0.402985	0.626866	1	0.164179	0.223881	0.447761	0.641791	0.776119	0.850746	0.865672	0.895522	0.925373	0.970149	0.402985	0.484848	0.074627	0.238806	0.522388	0.641791	0.970149	0.447761
0.334582	0.360799	0.304619	0.25	0.21125	0.215	0.011236	0.245943	0.51186	0.757803	1	0.002497	0.260924	0.515605	0.755306	0.996255	0.001248	0.2397	0.469413	0.701623	0.998752	0.43196	0.174782	0.393258	0.0925	0.0775	0.0025	0.001248	0.278402	0.526841	0.787765	1	0.021223	0.194757	0.423221	0.875156	0.998752	0.041199	0.269663	0.500624	0.635456	0.957553	0.516854	0.4025	0.004994	0.25593	0.456929	0.681648	0.996255	0.39201
0.400947	0.318863	0.280189	0.237757	0.21485	0.195103	0.003946	0.201263	0.434886	0.710339	1	0.001579	0.273875	0.513812	0.737964	0.995264	0.000789	0.325967	0.575375	0.796369	0.993686	0.416732	0.1397	0.443567	0.047393	0.082148	0.00158	0.000789	0.265193	0.51618	0.766377	1	0.32281	0.468035	0.604578	0.895817	0.993686	0.003157	0.187845	0.410418	0.722968	0.973954	0.453039	0.322275	0.003157	0.384373	0.588792	0.793212	0.993686	0.343331
0.285955	0.465938	0.248108	0.237374	0.143098	0.207071	0.006728	0.222876	0.472666	0.79058	0.997477	0.001682	0.269975	0.485282	0.658537	0.998318	0.000841	0.262405	0.58032	0.813288	1	0.58873	0.052145	0.359125	0.030303	0.087542	0.005051	0.000841	0.213625	0.42725	0.6291	1	0.005887	0.158957	0.315391	0.476871	0.936081	0.002523	0.400336	0.742641	0.86291	0.981497	0.568545	0.316498	0.002523	0.283431	0.522288	0.728343	0.995795	0.46005
0.4	0.314286	0.285714	0.318841	0.246377	0.173913	0.042857	0.342857	0.642857	0.828571	1	0.028571	0.171429	0.442857	0.628571	0.985714	0.014286	0.142857	0.414286	0.614286	0.9	0.457143	0.171429	0.371429	0.144928	0.086957	0	0.014286	0.157143	0.342857	0.628571	1	0.042857	0.085714	0.3	0.414286	0.457143	0.5	0.571429	0.785714	0.871429	0.971429	0.357143	0.434783	0.057143	0.214286	0.328571	0.571429	0.9	0.342857
0.332584	0.417978	0.249438	0.283784	0.166667	0.225225	0.006742	0.193258	0.424719	0.741573	0.993258	0.013483	0.296629	0.505618	0.72809	0.997753	0.002247	0.276404	0.541573	0.759551	1	0.606742	0.161798	0.231461	0.132883	0.051802	0.002252	0.002247	0.195506	0.402247	0.669663	1	0.006742	0.18427	0.435955	0.683146	0.995506	0.164045	0.573034	0.703371	0.835955	0.98427	0.310112	0.5	0.008989	0.321348	0.537079	0.755056	0.995506	0.447191
0.38746	0.342444	0.270096	0.256039	0.247987	0.175523	0.004823	0.22508	0.488746	0.747588	1	0.003215	0.284566	0.533762	0.755627	0.996785	0.001608	0.228296	0.474277	0.729904	0.995177	0.379421	0.036977	0.583601	0.020934	0.059581	0.00161	0.001608	0.233119	0.59164	0.869775	1	0.118971	0.35209	0.432476	0.824759	0.885852	0.030547	0.249196	0.477492	0.667203	0.9791	0.442122	0.386473	0.022508	0.247588	0.491961	0.696141	0.993569	0.368167
0.314685	0.376224	0.309091	0.2493	0.194678	0.235294	0.002797	0.267133	0.551049	0.774825	1	0.008392	0.21958	0.454545	0.723077	0.995804	0.001399	0.274126	0.48951	0.728671	0.998601	0.398601	0.18042	0.420979	0.088235	0.077031	0.004202	0.001399	0.278322	0.518881	0.827972	1	0.004196	0.186014	0.360839	0.87972	0.997203	0.039161	0.286713	0.534266	0.668531	0.927273	0.524476	0.383754	0.006993	0.246154	0.46014	0.681119	0.998601	0.376224
0.289308	0.396226	0.314465	0.214173	0.162205	0.248819	0.004717	0.238994	0.449686	0.756289	1	0.003145	0.215409	0.492138	0.746855	0.993711	0.001572	0.306604	0.528302	0.743711	0.996855	0.319182	0.006289	0.674528	0	0.119685	0.006299	0.001572	0.083333	0.371069	0.68239	1	0.528302	0.528302	0.949686	0.951258	0.95283	0.012579	0.289308	0.556604	0.759434	0.996855	0.512579	0.381102	0.006289	0.306604	0.561321	0.764151	0.996855	0.404088
0.366038	0.29434	0.339623	0.212121	0.280303	0.185606	0.007547	0.286792	0.554717	0.830189	0.996226	0.05283	0.207547	0.479245	0.675472	1	0.003774	0.241509	0.449057	0.686792	0.962264	0.498113	0.301887	0.2	0.109848	0.056818	0.003788	0.003774	0.241509	0.479245	0.728302	1	0.011321	0.154717	0.283019	0.501887	0.909434	0.354717	0.649057	0.769811	0.826415	0.958491	0.516981	0.340909	0.015094	0.233962	0.456604	0.675472	0.962264	0.324528
0.412596	0.25964	0.327763	0.217503	0.256113	0.162162	0.005141	0.294344	0.524422	0.744216	0.998715	0.006427	0.191517	0.48329	0.732648	1	0.001285	0.230077	0.460154	0.757069	0.992288	0.356041	0.131105	0.512853	0.047619	0.091377	0.003861	0.001285	0.233933	0.525707	0.745501	1	0.039846	0.170951	0.489717	0.742931	0.90617	0.020566	0.294344	0.471722	0.750643	0.992288	0.521851	0.388674	0.003856	0.194087	0.458869	0.742931	0.997429	0.268638
0.388095	0.27381	0.338095	0.202864	0.264916	0.181384	0.007143	0.264286	0.535714	0.778571	0.997619	0.009524	0.2	0.45	0.678571	1	0.002381	0.254762	0.519048	0.769048	0.995238	0.338095	0.145238	0.516667	0.076372	0.100239	0.004773	0.002381	0.214286	0.545238	0.816667	1	0.085714	0.278571	0.521429	0.92381	0.997619	0.004762	0.252381	0.430952	0.697619	0.897619	0.585714	0.396181	0.011905	0.25	0.459524	0.680952	0.995238	0.278571
0.372624	0.334601	0.292776	0.221374	0.179389	0.229008	0.019011	0.190114	0.467681	0.768061	1	0.007605	0.231939	0.513308	0.73384	0.980989	0.003802	0.296578	0.494297	0.703422	0.977186	0.311787	0.102662	0.585551	0.030534	0.099237	0	0.003802	0.087452	0.277567	0.703422	1	0.498099	0.806084	0.847909	0.882129	0.908745	0.019011	0.30038	0.48289	0.661597	0.984791	0.467681	0.312977	0.04943	0.30038	0.479087	0.665399	0.977186	0.30038
0.333333	0.312684	0.353982	0.213018	0.236686	0.224852	0.00885	0.250737	0.533923	0.781711	0.99705	0.0059	0.185841	0.386431	0.646018	0.99115	0.00295	0.300885	0.501475	0.761062	1	0.39233	0.19469	0.412979	0.065089	0.076923	0	0.00295	0.218289	0.427729	0.654867	1	0.156342	0.286136	0.489676	0.79941	0.952802	0.011799	0.215339	0.536873	0.831858	0.99115	0.542773	0.343195	0.00885	0.256637	0.486726	0.731563	0.9941	0.330383
0.413408	0.385475	0.201117	0.292135	0.134831	0.191011	0.011173	0.206704	0.458101	0.73743	0.988827	0.01676	0.324022	0.530726	0.748603	0.994413	0.005587	0.27933	0.452514	0.709497	1	0.670391	0.027933	0.301676	0.011236	0.044944	0	0.005587	0.469274	0.664804	0.832402	1	0.636872	0.636872	0.642458	0.648045	0.659218	0.039106	0.106145	0.24581	0.318436	0.458101	0.329609	0.325843	0.055866	0.26257	0.452514	0.664804	0.972067	0.430168
0.516854	0.235955	0.247191	0.220339	0.231638	0.135593	0.022472	0.303371	0.550562	0.808989	0.988764	0.011236	0.191011	0.432584	0.719101	1	0.005618	0.174157	0.410112	0.657303	0.994382	0.353933	0.095506	0.550562	0.045198	0.101695	0	0.005618	0.08427	0.460674	0.769663	1	0.404494	0.421348	0.44382	0.483146	0.870787	0.117978	0.264045	0.567416	0.758427	0.977528	0.410112	0.440678	0.039326	0.224719	0.432584	0.606742	0.960674	0.230337
0.331126	0.377483	0.291391	0.229236	0.229236	0.196013	0.013245	0.235099	0.47351	0.738411	0.996689	0.006623	0.261589	0.536424	0.811258	0.986755	0.003311	0.241722	0.460265	0.675497	1	0.453642	0.162252	0.384106	0.046512	0.07309	0	0.003311	0.258278	0.509934	0.837748	1	0.122517	0.274834	0.354305	0.562914	0.649007	0.033113	0.241722	0.486755	0.761589	0.903974	0.559603	0.41196	0.019868	0.231788	0.470199	0.705298	0.986755	0.427152
0.361702	0.414894	0.223404	0.344086	0.150538	0.11828	0.031915	0.223404	0.606383	0.776596	0.978723	0.021277	0.276596	0.489362	0.797872	1	0.010638	0.180851	0.351064	0.478723	0.712766	0.670213	0.234043	0.095745	0.107527	0.021505	0	0.010638	0.234043	0.56383	0.829787	1	0.12766	0.170213	0.276596	0.382979	0.553191	0.606383	0.617021	0.638298	0.659574	0.691489	0.319149	0.344086	0.06383	0.191489	0.404255	0.489362	0.691489	0.457447
0.354839	0.270968	0.374194	0.168831	0.25974	0.24026	0.025806	0.193548	0.483871	0.793548	0.987097	0.012903	0.206452	0.445161	0.735484	1	0.006452	0.264516	0.516129	0.709677	0.993548	0.296774	0	0.703226	0	0.103896	0	0.006452	0.187097	0.348387	0.729032	1	0	0	0	0	0	0.051613	0.251613	0.516129	0.76129	0.980645	0.522581	0.363636	0.058065	0.270968	0.548387	0.741935	0.974194	0.283871
0.341463	0.382114	0.276423	0.278689	0.196721	0.245902	0.01626	0.195122	0.504065	0.699187	0.99187	0.02439	0.211382	0.479675	0.731707	0.97561	0.00813	0.276423	0.487805	0.756098	1	0.349593	0.219512	0.430894	0.081967	0.065574	0	0.00813	0.211382	0.414634	0.756098	1	0.252033	0.292683	0.373984	0.463415	0.853659	0.065041	0.162602	0.609756	0.715447	0.95935	0.447154	0.278689	0.121951	0.300813	0.471545	0.788618	0.98374	0.382114
0.409449	0.259843	0.330709	0.209486	0.300395	0.16996	0.007874	0.30315	0.480315	0.80315	1	0.019685	0.181102	0.523622	0.700787	0.952756	0.003937	0.244094	0.5	0.724409	0.988189	0.275591	0.279528	0.444882	0.071146	0.063241	0.007905	0.003937	0.133858	0.448819	0.728346	1	0.047244	0.122047	0.299213	0.807087	0.996063	0.169291	0.401575	0.531496	0.748031	0.96063	0.472441	0.474308	0.023622	0.244094	0.515748	0.744094	0.988189	0.26378
0.397177	0.358871	0.243952	0.266667	0.185859	0.181818	0.006048	0.185484	0.417339	0.72379	0.997984	0.004032	0.252016	0.495968	0.756048	0.991935	0.002016	0.403226	0.574597	0.774194	1	0.612903	0.165323	0.221774	0.068687	0.068687	0	0.002016	0.191532	0.366935	0.635081	1	0.235887	0.471774	0.671371	0.877016	0.977823	0.020161	0.316532	0.627016	0.784274	0.987903	0.342742	0.290909	0.020161	0.40121	0.594758	0.802419	0.989919	0.417339
0.393862	0.294118	0.31202	0.194872	0.266667	0.2	0.007673	0.232737	0.462916	0.716113	0.997442	0.005115	0.240409	0.534527	0.769821	0.97954	0.002558	0.28133	0.514066	0.734015	1	0.40665	0.396419	0.196931	0.105128	0.053846	0.017949	0.002558	0.245524	0.526854	0.767263	1	0.046036	0.219949	0.501279	0.7289	0.953964	0.007673	0.250639	0.475703	0.887468	0.992327	0.450128	0.405128	0.012788	0.283887	0.521739	0.731458	0.987212	0.329923
0.405303	0.367424	0.227273	0.288973	0.18251	0.171103	0.011364	0.291667	0.503788	0.772727	0.996212	0.007576	0.234848	0.560606	0.806818	1	0.003788	0.17803	0.382576	0.575758	0.901515	0.640152	0.121212	0.238636	0.038023	0.053232	0.007605	0.003788	0.227273	0.617424	0.837121	1	0.079545	0.375	0.431818	0.541667	0.666667	0.007576	0.284091	0.344697	0.575758	0.734848	0.439394	0.34981	0.015152	0.185606	0.435606	0.651515	0.992424	0.397727
0.353535	0.40404	0.242424	0.234694	0.193878	0.204082	0.050505	0.20202	0.383838	0.717172	0.959596	0.020202	0.242424	0.565657	0.686869	1	0.010101	0.353535	0.505051	0.818182	0.989899	0.474747	0.323232	0.20202	0.142857	0.040816	0	0.010101	0.292929	0.686869	0.878788	1	0.030303	0.242424	0.515152	0.646465	0.818182	0.111111	0.151515	0.333333	0.383838	0.434343	0.393939	0.387755	0.030303	0.222222	0.454545	0.767677	0.979798	0.383838
0.414894	0.212766	0.37234	0.193548	0.354839	0.150538	0.031915	0.159574	0.478723	0.723404	1	0.170213	0.265957	0.489362	0.755319	0.957447	0.010638	0.212766	0.468085	0.744681	0.93617	0.425532	0.574468	0	0.172043	0	0	0.010638	0.234043	0.5	0.744681	1	0.031915	0.265957	0.468085	0.659574	0.93617	0	0	0	0	0	0.425532	0.387097	0.042553	0.297872	0.542553	0.840426	0.946809	0.191489
0.452096	0.434132	0.113772	0.381381	0.12012	0.069069	0.011976	0.275449	0.482036	0.718563	1	0.005988	0.308383	0.649701	0.805389	0.991018	0.002994	0.07485	0.212575	0.335329	0.556886	0.898204	0.020958	0.080838	0.018018	0.036036	0	0.002994	0.236527	0.538922	0.775449	1	0.020958	0.020958	0.335329	0.341317	0.347305	0.08982	0.254491	0.38024	0.44012	0.57485	0.173653	0.198198	0.038922	0.188623	0.290419	0.416168	0.772455	0.476048
0.28551	0.392577	0.321913	0.234286	0.175714	0.248571	0.001428	0.290507	0.508922	0.758744	0.996431	0.002855	0.231263	0.473947	0.73733	0.999286	0.000714	0.243398	0.517488	0.750178	1	0.539615	0.373305	0.087081	0.117143	0.027143	0.004286	0.000714	0.24768	0.484654	0.721627	1	0.002141	0.227695	0.492505	0.744468	0.93576	0.033547	0.321199	0.660956	0.958601	0.995004	0.610992	0.29	0.002141	0.255532	0.523911	0.753747	0.998572	0.427552
0.385925	0.360953	0.253121	0.252273	0.177273	0.184091	0.00454	0.284904	0.627696	0.819523	0.998865	0.00227	0.211124	0.473326	0.711691	0.99319	0.001135	0.250851	0.417707	0.62202	1	0.500568	0.112372	0.38706	0.045455	0.079545	0.006818	0.001135	0.160045	0.494892	0.816118	1	0.095346	0.273553	0.385925	0.497162	0.860386	0.111237	0.300795	0.54143	0.683314	0.979569	0.402951	0.320455	0.003405	0.22815	0.401816	0.587968	0.99546	0.38706
0.39586	0.310479	0.293661	0.217617	0.226684	0.204663	0.003881	0.204398	0.482536	0.791721	1	0.002587	0.279431	0.542044	0.741268	0.988357	0.001294	0.26132	0.485123	0.705045	0.989651	0.495472	0.128072	0.376455	0.054404	0.07772	0.005181	0.001294	0.156533	0.398448	0.699871	1	0.023286	0.359638	0.514877	0.637775	0.97542	0.029754	0.344114	0.595084	0.83053	0.996119	0.45925	0.352332	0.007762	0.315653	0.503234	0.712807	0.989651	0.359638
0.319319	0.415415	0.265265	0.226453	0.182365	0.194389	0.002002	0.247247	0.556557	0.790791	0.994995	0.003003	0.242242	0.444444	0.731732	0.997998	0.001001	0.248248	0.510511	0.713714	1	0.593594	0.052052	0.354354	0.034068	0.074148	0.006012	0.001001	0.301301	0.484484	0.78979	1	0.132132	0.4004	0.538539	0.774775	0.952953	0.038038	0.218218	0.513514	0.714715	0.992993	0.407407	0.380762	0.004004	0.245245	0.437437	0.705706	0.996997	0.428428
0.453228	0.305665	0.241107	0.271768	0.224274	0.156992	0.013175	0.283267	0.474308	0.768116	0.998682	0.002635	0.26087	0.524374	0.783926	1	0.001318	0.188406	0.482213	0.699605	0.997365	0.513834	0.171278	0.314888	0.064644	0.077836	0.001319	0.001318	0.251647	0.549407	0.83004	1	0.006588	0.189723	0.382082	0.545455	0.747036	0.022398	0.272727	0.517787	0.732543	0.976285	0.345191	0.290237	0.00527	0.201581	0.399209	0.636364	0.997365	0.350461
0.346939	0.318367	0.334694	0.221311	0.258197	0.204918	0.008163	0.212245	0.453061	0.75102	1	0.028571	0.24898	0.502041	0.734694	0.991837	0.004082	0.261224	0.510204	0.714286	0.983673	0.4	0.183673	0.416327	0.069672	0.094262	0.004098	0.004082	0.155102	0.383673	0.689796	1	0.044898	0.232653	0.497959	0.628571	0.722449	0.061224	0.277551	0.571429	0.828571	0.983673	0.57551	0.434426	0.028571	0.240816	0.465306	0.677551	0.983673	0.257143
0.342268	0.371134	0.286598	0.245868	0.200413	0.216942	0.004124	0.224742	0.461856	0.709278	0.995876	0.014433	0.251546	0.492784	0.783505	0.989691	0.002062	0.274227	0.515464	0.764948	1	0.391753	0.098969	0.509278	0.053719	0.11157	0.012397	0.002062	0.245361	0.51134	0.795876	1	0.008247	0.294845	0.441237	0.82268	0.997938	0.020619	0.235052	0.492784	0.65567	0.950515	0.529897	0.433884	0.010309	0.286598	0.529897	0.781443	0.993814	0.391753
0.337237	0.466042	0.196721	0.309859	0.126761	0.171362	0.018735	0.274005	0.559719	0.796253	0.997658	0.004684	0.220141	0.428571	0.70726	1	0.002342	0.278689	0.526932	0.765808	0.98829	0.702576	0.105386	0.192037	0.039906	0.058685	0.007042	0.002342	0.210773	0.42623	0.70726	1	0.023419	0.283372	0.613583	0.737705	0.786885	0.098361	0.491803	0.576112	0.814988	0.971897	0.334895	0.29108	0.023419	0.241218	0.487119	0.711944	0.98829	0.477752
0.292994	0.388535	0.318471	0.214286	0.19898	0.279337	0.002548	0.264968	0.521019	0.728662	0.997452	0.005096	0.242038	0.490446	0.755414	1	0.001274	0.234395	0.487898	0.756688	0.996178	0.466242	0.263694	0.270064	0.118622	0.057398	0.003827	0.001274	0.203822	0.466242	0.721019	1	0.002548	0.257325	0.426752	0.807643	0.993631	0.006369	0.319745	0.541401	0.710828	0.984713	0.563057	0.423469	0.003822	0.266242	0.459873	0.704459	0.996178	0.383439
0.422509	0.315498	0.261993	0.297597	0.179298	0.190388	0.005535	0.191882	0.433579	0.739852	0.998155	0.00369	0.258303	0.49262	0.730627	0.99631	0.001845	0.359779	0.568266	0.761993	1	0.592251	0.226937	0.180812	0.103512	0.05915	0.003697	0.001845	0.201107	0.442804	0.774908	1	0.009225	0.383764	0.601476	0.763838	0.994465	0.04059	0.350554	0.501845	0.660517	0.98893	0.359779	0.32902	0.01107	0.400369	0.595941	0.782288	0.990775	0.376384
0.374408	0.334123	0.291469	0.228029	0.228029	0.213777	0.004739	0.303318	0.514218	0.765403	0.99763	0.007109	0.279621	0.545024	0.741706	0.983412	0.00237	0.177725	0.405213	0.684834	1	0.566351	0.094787	0.338863	0.035629	0.078385	0.007126	0.00237	0.322275	0.594787	0.78673	1	0.049763	0.263033	0.393365	0.471564	0.969194	0.023697	0.116114	0.343602	0.654028	0.995261	0.450237	0.413302	0.018957	0.189573	0.393365	0.64218	0.995261	0.372038
0.351682	0.316514	0.331804	0.192956	0.222052	0.217458	0.006116	0.262997	0.547401	0.750765	1	0.003058	0.233945	0.454128	0.698777	0.995413	0.001529	0.247706	0.486239	0.769113	0.990826	0.545872	0.172783	0.281346	0.07657	0.073507	0	0.001529	0.270642	0.550459	0.70948	1	0.067278	0.321101	0.602446	0.810398	0.990826	0.007645	0.17737	0.35474	0.732416	0.934251	0.5	0.352221	0.007645	0.233945	0.457187	0.785933	0.990826	0.334862
0.324228	0.350356	0.325416	0.239001	0.210464	0.224732	0.008314	0.238717	0.486936	0.73753	0.998812	0.003563	0.251781	0.534442	0.774347	0.996437	0.001188	0.239905	0.480998	0.726841	1	0.406176	0.2019	0.391924	0.070155	0.084423	0.008323	0.001188	0.249406	0.526128	0.756532	1	0.004751	0.23753	0.566508	0.700713	0.947743	0.007126	0.25772	0.396675	0.748219	0.997625	0.598575	0.35434	0.004751	0.220903	0.488124	0.752969	0.996437	0.385986
0.331126	0.331126	0.337748	0.246667	0.22	0.213333	0.013245	0.231788	0.443709	0.695364	0.993377	0.05298	0.225166	0.456954	0.688742	1	0.006623	0.245033	0.543046	0.794702	0.97351	0.370861	0.298013	0.331126	0.126667	0.046667	0.006667	0.006623	0.145695	0.562914	0.774834	1	0.013245	0.238411	0.596026	0.860927	0.960265	0.165563	0.317881	0.403974	0.483444	0.807947	0.384106	0.466667	0.019868	0.198675	0.523179	0.721854	0.953642	0.377483
0.262887	0.371134	0.365979	0.207254	0.207254	0.284974	0.030928	0.195876	0.515464	0.747423	0.958763	0.020619	0.273196	0.5	0.783505	1	0.005155	0.231959	0.469072	0.71134	0.979381	0.417526	0.463918	0.118557	0.124352	0.041451	0	0.005155	0.283505	0.582474	0.824742	1	0.010309	0.324742	0.510309	0.675258	0.93299	0.082474	0.103093	0.242268	0.273196	0.984536	0.453608	0.487047	0.015464	0.262887	0.474227	0.695876	0.938144	0.386598
0.340659	0.395604	0.263736	0.355556	0.144444	0.2	0.043956	0.186813	0.43956	0.725275	1	0.021978	0.197802	0.516484	0.714286	0.989011	0.010989	0.32967	0.56044	0.747253	0.967033	0.593407	0.373626	0.032967	0.155556	0.022222	0	0.010989	0.142857	0.362637	0.593407	1	0.252747	0.395604	0.659341	0.769231	0.912088	0.945055	0.945055	0.945055	0.956044	0.967033	0.395604	0.333333	0.098901	0.384615	0.516484	0.67033	0.912088	0.406593
0.306667	0.410794	0.28254	0.243329	0.190597	0.210292	0.003175	0.246349	0.475556	0.723175	1	0.00127	0.289524	0.613968	0.787302	0.99873	0.000635	0.208254	0.420317	0.624127	0.998095	0.624762	0.172698	0.20254	0.064168	0.047649	0.006989	0.000635	0.366984	0.658413	0.823492	1	0.012063	0.11746	0.236825	0.513016	0.972063	0.001905	0.222857	0.311111	0.480635	0.908571	0.462857	0.343075	0.001905	0.191111	0.39746	0.604444	0.998095	0.44127
0.220833	0.5375	0.241667	0.200837	0.125523	0.230126	0.020833	0.1625	0.258333	0.508333	0.995833	0.008333	0.429167	0.6375	0.8	1	0.004167	0.141667	0.320833	0.5875	0.979167	0.720833	0.195833	0.083333	0.037657	0.020921	0.004184	0.004167	0.408333	0.5875	0.816667	1	0.066667	0.125	0.195833	0.283333	0.35	0.025	0.041667	0.629167	0.65	0.670833	0.733333	0.217573	0.0375	0.325	0.545833	0.7375	0.979167	0.558333
0.417085	0.318593	0.264322	0.236419	0.208249	0.165996	0.005025	0.229146	0.521608	0.774874	0.998995	0.00201	0.245226	0.512563	0.767839	0.994975	0.001005	0.262312	0.464322	0.679397	1	0.517588	0.115578	0.366834	0.047284	0.091549	0.00503	0.001005	0.159799	0.527638	0.794975	1	0.123618	0.285427	0.390955	0.535678	0.868342	0.00402	0.294472	0.515578	0.676382	0.99598	0.415075	0.336016	0.003015	0.228141	0.40201	0.59598	0.980905	0.351759
0.432	0.256	0.312	0.225806	0.233871	0.177419	0.048	0.272	0.52	0.776	1	0.032	0.232	0.448	0.712	0.984	0.008	0.216	0.48	0.704	0.968	0.432	0.168	0.4	0.056452	0.072581	0.008065	0.008	0.192	0.36	0.76	1	0.2	0.232	0.384	0.68	0.976	0.024	0.424	0.536	0.784	0.888	0.464	0.354839	0.016	0.352	0.504	0.696	0.968	0.248
0.359929	0.41844	0.221631	0.309059	0.152753	0.179396	0.005319	0.274823	0.489362	0.696809	0.996454	0.003546	0.265957	0.512411	0.72695	1	0.001773	0.189716	0.446809	0.810284	0.992908	0.638298	0.171986	0.189716	0.065719	0.044405	0.005329	0.001773	0.317376	0.491135	0.656028	1	0.019504	0.147163	0.324468	0.812057	0.994681	0.04078	0.191489	0.693262	0.886525	0.978723	0.379433	0.294849	0.01773	0.230496	0.402482	0.803191	0.994681	0.409574
0.411765	0.323529	0.264706	0.237037	0.214815	0.162963	0.029412	0.242647	0.544118	0.772059	1	0.014706	0.220588	0.514706	0.779412	0.955882	0.007353	0.264706	0.404412	0.683824	0.926471	0.441176	0.191176	0.367647	0.051852	0.081481	0.022222	0.007353	0.220588	0.705882	0.830882	1	0.154412	0.191176	0.676471	0.889706	0.941176	0.029412	0.25	0.375	0.5	0.639706	0.433824	0.444444	0.051471	0.294118	0.514706	0.742647	0.926471	0.323529
0.370474	0.337047	0.292479	0.215084	0.251397	0.164804	0.008357	0.253482	0.479109	0.70195	1	0.02507	0.320334	0.526462	0.777159	0.994429	0.002786	0.214485	0.51532	0.724234	0.997214	0.440111	0.197772	0.362117	0.125698	0.055866	0.011173	0.002786	0.37883	0.562674	0.802228	0.991643	0.008357	0.590529	0.715877	0.832869	1	0.011142	0.153203	0.245125	0.437326	0.902507	0.420613	0.402235	0.005571	0.197772	0.568245	0.746518	0.997214	0.376045
0.289855	0.415459	0.294686	0.228155	0.126214	0.276699	0.043478	0.323671	0.560386	0.768116	1	0.009662	0.207729	0.42029	0.714976	0.995169	0.004831	0.193237	0.512077	0.710145	0.971014	0.565217	0.256039	0.178744	0.097087	0.038835	0.009709	0.004831	0.154589	0.362319	0.550725	1	0.024155	0.275362	0.657005	0.772947	0.966184	0.415459	0.57971	0.623188	0.884058	0.980676	0.468599	0.407767	0.024155	0.275362	0.497585	0.772947	0.971014	0.449275
0.315985	0.3829	0.301115	0.25	0.186567	0.242537	0.007435	0.286245	0.494424	0.762082	1	0.022305	0.260223	0.572491	0.784387	0.996283	0.003717	0.200743	0.408922	0.609665	0.988848	0.773234	0.152416	0.074349	0.070896	0.033582	0.011194	0.003717	0.330855	0.550186	0.747212	1	0.011152	0.223048	0.282528	0.821561	0.918216	0.052045	0.066914	0.156134	0.472119	0.988848	0.364312	0.425373	0.01487	0.249071	0.483271	0.825279	0.988848	0.412639
0.402597	0.320346	0.277056	0.273913	0.230435	0.182609	0.008658	0.199134	0.47619	0.722944	0.995671	0.030303	0.285714	0.575758	0.796537	1	0.004329	0.255411	0.428571	0.636364	0.991342	0.354978	0.095238	0.549784	0.034783	0.086957	0	0.004329	0.181818	0.471861	0.714286	1	0.450216	0.792208	0.844156	0.865801	0.900433	0.030303	0.246753	0.419913	0.658009	0.991342	0.506494	0.365217	0.034632	0.251082	0.454545	0.65368	0.991342	0.320346
0.389247	0.384946	0.225806	0.25	0.200431	0.176724	0.006452	0.219355	0.498925	0.744086	1	0.004301	0.28172	0.56129	0.767742	0.995699	0.002151	0.23871	0.43871	0.660215	0.997849	0.677419	0.094624	0.227957	0.036638	0.040948	0.006466	0.002151	0.27957	0.595699	0.804301	1	0.283871	0.322581	0.436559	0.834409	0.926882	0.032258	0.126882	0.329032	0.486022	0.802151	0.408602	0.37931	0.012903	0.24086	0.443011	0.724731	0.989247	0.380645
0.390244	0.34334	0.266417	0.229323	0.24812	0.171053	0.013133	0.247655	0.478424	0.748593	0.994371	0.003752	0.292683	0.527205	0.742964	1	0.001876	0.212008	0.474672	0.756098	0.998124	0.562852	0.135084	0.302064	0.06015	0.067669	0.007519	0.001876	0.35272	0.555347	0.818011	1	0.015009	0.566604	0.688555	0.786116	0.981238	0.018762	0.140713	0.253283	0.472795	0.938086	0.35272	0.417293	0.009381	0.21576	0.529081	0.793621	0.979362	0.377111
0.332898	0.402089	0.265013	0.235294	0.181699	0.188235	0.003916	0.263708	0.505222	0.738903	1	0.002611	0.18799	0.443864	0.766319	0.998695	0.001305	0.355091	0.537859	0.741514	0.993473	0.556136	0.120104	0.32376	0.047059	0.099346	0.005229	0.001305	0.193211	0.455614	0.793734	1	0.011749	0.519582	0.655352	0.727154	0.949086	0.009138	0.266319	0.468668	0.680157	0.98564	0.506527	0.420915	0.009138	0.253264	0.544386	0.75718	0.993473	0.385117
0.257426	0.445545	0.29703	0.18543	0.188742	0.251656	0.013201	0.29703	0.50495	0.815182	1	0.006601	0.20132	0.465347	0.722772	0.9967	0.0033	0.267327	0.524752	0.716172	0.990099	0.442244	0.171617	0.386139	0.05298	0.086093	0	0.0033	0.148515	0.425743	0.712871	1	0.026403	0.339934	0.481848	0.676568	0.762376	0.115512	0.306931	0.570957	0.848185	0.993399	0.521452	0.423841	0.023102	0.287129	0.50495	0.686469	0.986799	0.471947
0.35473	0.572635	0.072635	0.351946	0.05753	0.052453	0.005068	0.233108	0.447635	0.689189	0.996622	0.003378	0.228041	0.552365	0.790541	1	0.001689	0.407095	0.486486	0.548986	0.974662	0.902027	0.050676	0.047297	0.027073	0.013536	0	0.001689	0.239865	0.547297	0.773649	1	0.059122	0.403716	0.461149	0.488176	0.628378	0.14527	0.157095	0.427365	0.5	0.511824	0.570946	0.368866	0.011824	0.293919	0.554054	0.798986	0.996622	0.569257
0.340426	0.404255	0.255319	0.3	0.178571	0.157143	0.049645	0.22695	0.510638	0.659574	1	0.014184	0.319149	0.602837	0.843972	0.978723	0.007092	0.184397	0.361702	0.560284	0.964539	0.496454	0.446809	0.056738	0.157143	0.014286	0	0.007092	0.333333	0.602837	0.815603	1	0.014184	0.148936	0.340426	0.539007	0.77305	0.886525	0.893617	0.907801	0.921986	0.93617	0.35461	0.414286	0.014184	0.184397	0.397163	0.638298	0.907801	0.375887
0.331288	0.323108	0.345603	0.196721	0.221311	0.239754	0.00818	0.155419	0.453988	0.744376	0.997955	0.00409	0.267894	0.476483	0.762781	1	0.002045	0.306748	0.535787	0.725971	0.989775	0.486708	0.167689	0.345603	0.063525	0.071721	0.006148	0.002045	0.128834	0.321063	0.650307	1	0.014315	0.425358	0.631902	0.764826	0.9182	0.01227	0.382413	0.560327	0.785276	0.99182	0.523517	0.364754	0.006135	0.333333	0.525562	0.766871	0.97955	0.359918
0.371212	0.318182	0.310606	0.21519	0.243038	0.205063	0.005051	0.300505	0.542929	0.780303	1	0.012626	0.212121	0.436869	0.707071	0.994949	0.002525	0.25	0.494949	0.755051	0.989899	0.229798	0.007576	0.762626	0.005063	0.075949	0	0.002525	0.222222	0.542929	0.739899	1	0.138889	0.138889	0.138889	0.141414	0.143939	0.022727	0.267677	0.494949	0.770202	0.984848	0.502525	0.475949	0.010101	0.262626	0.449495	0.699495	0.989899	0.366162
0.39528	0.312684	0.292035	0.239645	0.224852	0.204142	0.014749	0.315634	0.569322	0.787611	1	0.0059	0.176991	0.427729	0.687316	0.99115	0.00295	0.224189	0.471976	0.728614	0.985251	0.622419	0.144543	0.233038	0.053254	0.059172	0	0.00295	0.188791	0.380531	0.758112	1	0.085546	0.156342	0.412979	0.539823	0.784661	0.303835	0.560472	0.710914	0.849558	0.982301	0.427729	0.420118	0.011799	0.238938	0.480826	0.666667	0.985251	0.365782
0.254464	0.428571	0.316964	0.188341	0.170404	0.242152	0.013393	0.330357	0.59375	0.78125	0.986607	0.008929	0.183036	0.415179	0.683036	0.950893	0.004464	0.227679	0.549107	0.772321	1	0.5	0.178571	0.321429	0.058296	0.085202	0.004484	0.004464	0.142857	0.330357	0.633929	1	0.026786	0.339286	0.5625	0.620536	0.9375	0.09375	0.495536	0.6875	0.870536	0.991071	0.459821	0.466368	0.022321	0.245536	0.473214	0.6875	0.991071	0.473214
0.401639	0.229508	0.368852	0.165289	0.272727	0.247934	0.02459	0.229508	0.491803	0.737705	1	0.040984	0.270492	0.47541	0.754098	0.991803	0.008197	0.254098	0.459016	0.704918	0.983607	0.418033	0.286885	0.295082	0.140496	0.057851	0.008264	0.008197	0.286885	0.680328	0.819672	1	0.016393	0.204918	0.319672	0.696721	0.95082	0.090164	0.155738	0.532787	0.606557	0.909836	0.442623	0.46281	0.016393	0.262295	0.442623	0.680328	0.983607	0.237705
0.407767	0.237864	0.354369	0.136585	0.35122	0.165854	0.014563	0.237864	0.466019	0.752427	0.995146	0.019417	0.218447	0.485437	0.631068	0.985437	0.004854	0.291262	0.524272	0.76699	1	0.461165	0.169903	0.368932	0.068293	0.087805	0.019512	0.004854	0.145631	0.504854	0.699029	1	0.218447	0.291262	0.616505	0.936893	0.980583	0.038835	0.330097	0.436893	0.73301	0.912621	0.475728	0.419512	0.019417	0.354369	0.514563	0.752427	0.980583	0.208738
0.409091	0.42562	0.165289	0.298137	0.093168	0.144928	0.006198	0.475207	0.659091	0.830579	1	0.004132	0.194215	0.417355	0.67562	0.997934	0.002066	0.163223	0.27686	0.409091	0.995868	0.716942	0.068182	0.214876	0.018634	0.093168	0.00207	0.002066	0.303719	0.61157	0.793388	1	0.010331	0.07438	0.161157	0.206612	0.225207	0.095041	0.252066	0.411157	0.528926	0.985537	0.27686	0.231884	0.008264	0.113636	0.219008	0.326446	0.995868	0.46281
0.34507	0.302817	0.352113	0.241135	0.22695	0.212766	0.035211	0.21831	0.464789	0.647887	0.957746	0.014085	0.267606	0.577465	0.823944	0.985915	0.007042	0.197183	0.450704	0.732394	1	0.380282	0.352113	0.267606	0.163121	0.049645	0.007092	0.007042	0.316901	0.556338	0.732394	1	0.169014	0.422535	0.577465	0.816901	0.992958	0.042254	0.098592	0.232394	0.295775	0.922535	0.478873	0.347518	0.035211	0.253521	0.612676	0.809859	1	0.316901
0.316327	0.346939	0.336735	0.220513	0.25641	0.261538	0.010204	0.209184	0.479592	0.688776	1	0.015306	0.229592	0.52551	0.80102	0.994898	0.005102	0.285714	0.484694	0.714286	0.933673	0.413265	0.469388	0.117347	0.123077	0.041026	0	0.005102	0.30102	0.591837	0.831633	1	0.015306	0.321429	0.489796	0.673469	0.928571	0.112245	0.132653	0.265306	0.295918	0.979592	0.44898	0.492308	0.020408	0.270408	0.479592	0.719388	0.933673	0.331633
0.410628	0.309179	0.280193	0.223301	0.252427	0.140777	0.009662	0.207729	0.497585	0.753623	0.990338	0.048309	0.285024	0.410628	0.676329	1	0.004831	0.169082	0.599034	0.78744	0.975845	0.541063	0.130435	0.328502	0.067961	0.067961	0	0.004831	0.26087	0.396135	0.647343	1	0.014493	0.067633	0.603865	0.753623	0.937198	0.091787	0.198068	0.570048	0.801932	0.995169	0.512077	0.378641	0.014493	0.31401	0.536232	0.758454	0.995169	0.304348
0.327965	0.366032	0.306003	0.266862	0.217009	0.22434	0.004392	0.222548	0.524158	0.793558	0.992679	0.002928	0.232796	0.481698	0.708638	1	0.001464	0.292826	0.49634	0.743777	0.998536	0.387994	0.17716	0.434846	0.079179	0.073314	0.005865	0.001464	0.257687	0.483163	0.82284	1	0.010249	0.18448	0.395315	0.866764	0.998536	0.033675	0.27672	0.531479	0.679356	0.926794	0.537335	0.378299	0.011713	0.25183	0.464129	0.693997	0.998536	0.382138
0.432161	0.316583	0.251256	0.257576	0.212121	0.19697	0.01005	0.261307	0.542714	0.809045	1	0.055276	0.246231	0.462312	0.723618	0.98995	0.005025	0.18593	0.447236	0.633166	0.964824	0.386935	0.236181	0.376884	0.10101	0.070707	0.010101	0.005025	0.170854	0.557789	0.834171	1	0.01005	0.180905	0.457286	0.658291	0.733668	0.045226	0.266332	0.361809	0.773869	0.959799	0.351759	0.414141	0.015075	0.19598	0.467337	0.658291	0.964824	0.321608
0.290934	0.384303	0.324763	0.210027	0.185637	0.242547	0.008119	0.286874	0.535859	0.742896	0.994587	0.002706	0.236806	0.499323	0.746955	0.997294	0.001353	0.219215	0.461434	0.753721	1	0.462788	0.253045	0.284168	0.097561	0.054201	0	0.001353	0.236806	0.50203	0.691475	1	0.005413	0.231394	0.564276	0.818674	0.97023	0.087957	0.296346	0.396482	0.7023	0.99594	0.543978	0.384824	0.006766	0.219215	0.44249	0.728011	0.99594	0.400541
0.398637	0.311755	0.289608	0.204778	0.238908	0.18942	0.015332	0.238501	0.495741	0.729131	0.998296	0.003407	0.221465	0.451448	0.778535	1	0.001704	0.270869	0.526405	0.737649	0.994889	0.374787	0.076661	0.548552	0.02901	0.087031	0.011945	0.001704	0.287905	0.551959	0.877342	1	0.006814	0.109029	0.439523	0.822828	0.993186	0.015332	0.241908	0.487223	0.67632	0.979557	0.44293	0.372014	0.006814	0.255537	0.511073	0.722317	0.994889	0.342419
0.40458	0.274809	0.320611	0.223077	0.3	0.2	0.015267	0.221374	0.435115	0.725191	0.992366	0.038168	0.236641	0.587786	0.770992	1	0.007634	0.244275	0.48855	0.717557	0.977099	0.251908	0	0.748092	0	0.123077	0	0.007634	0.259542	0.480916	0.687023	1	0	0	0	0	0	0.022901	0.229008	0.526718	0.763359	0.984733	0.534351	0.415385	0.045802	0.312977	0.572519	0.740458	0.977099	0.320611
0.378995	0.406393	0.214612	0.33945	0.174312	0.155963	0.013699	0.26484	0.493151	0.680365	0.995434	0.009132	0.315068	0.607306	0.799087	0.981735	0.004566	0.146119	0.3379	0.561644	1	0.52968	0.223744	0.246575	0.091743	0.055046	0	0.004566	0.242009	0.511416	0.684932	1	0.091324	0.26484	0.456621	0.69863	0.908676	0.022831	0.219178	0.515982	0.922374	0.986301	0.388128	0.357798	0.031963	0.255708	0.43379	0.716895	0.986301	0.410959
0.34375	0.320312	0.335938	0.267717	0.188976	0.251969	0.023438	0.242188	0.460938	0.757812	0.976562	0.015625	0.148438	0.445312	0.703125	0.953125	0.007812	0.273438	0.539062	0.773438	1	0.390625	0.140625	0.46875	0.07874	0.110236	0	0.007812	0.101562	0.476562	0.726562	1	0.273438	0.414062	0.625	0.789062	0.835938	0.03125	0.226562	0.5	0.867188	0.984375	0.523438	0.425197	0.046875	0.335938	0.53125	0.742188	0.984375	0.351562
0.352554	0.31631	0.331137	0.19637	0.239274	0.219472	0.003295	0.265239	0.518946	0.818781	0.998353	0.016474	0.243822	0.500824	0.708402	0.99341	0.001647	0.230643	0.469522	0.705107	1	0.490939	0.169687	0.339374	0.061056	0.064356	0.00495	0.001647	0.248764	0.52883	0.759473	1	0.031301	0.23888	0.444811	0.546952	0.869852	0.008237	0.261944	0.589786	0.820428	0.996705	0.439868	0.333333	0.011532	0.217463	0.500824	0.688633	0.995058	0.350906
0.290844	0.414722	0.294434	0.23741	0.176259	0.26259	0.003591	0.240575	0.48474	0.788151	0.994614	0.005386	0.253142	0.517056	0.694794	0.998205	0.001795	0.244165	0.472172	0.745063	1	0.603232	0.213645	0.183124	0.071942	0.05036	0	0.001795	0.263914	0.517056	0.732496	1	0.014363	0.231598	0.454219	0.773788	0.994614	0.030521	0.199282	0.43088	0.745063	0.964093	0.536804	0.330935	0.005386	0.233393	0.493716	0.692998	0.992819	0.420108
0.419355	0.348387	0.232258	0.28479	0.177994	0.161812	0.006452	0.232258	0.587097	0.825806	1	0.019355	0.329032	0.493548	0.735484	0.993548	0.003226	0.16129	0.387097	0.606452	0.848387	0.567742	0.264516	0.167742	0.084142	0.038835	0	0.003226	0.280645	0.483871	0.696774	1	0.009677	0.106452	0.306452	0.558065	0.725806	0.206452	0.764516	0.816129	0.858065	0.977419	0.416129	0.28479	0.009677	0.164516	0.393548	0.577419	0.935484	0.341935
0.33494	0.351807	0.313253	0.253623	0.229469	0.236715	0.004819	0.19759	0.518072	0.737349	0.987952	0.007229	0.284337	0.551807	0.775904	1	0.00241	0.236145	0.443373	0.681928	0.995181	0.566265	0.154217	0.279518	0.060386	0.060386	0.002415	0.00241	0.289157	0.554217	0.742169	1	0.151807	0.33253	0.443373	0.546988	0.850602	0.028916	0.142169	0.4	0.790361	0.927711	0.438554	0.362319	0.031325	0.236145	0.428916	0.650602	0.963855	0.387952
0.434211	0.236842	0.328947	0.198675	0.284768	0.198675	0.013158	0.269737	0.585526	0.822368	1	0.019737	0.157895	0.394737	0.657895	0.947368	0.006579	0.263158	0.453947	0.684211	0.973684	0.361842	0.335526	0.302632	0.10596	0.05298	0.013245	0.006579	0.25	0.434211	0.651316	1	0.019737	0.144737	0.348684	0.684211	0.789474	0.118421	0.532895	0.618421	0.894737	0.973684	0.460526	0.370861	0.026316	0.210526	0.407895	0.671053	0.953947	0.217105
0.325991	0.348018	0.325991	0.230088	0.199115	0.238938	0.030837	0.246696	0.506608	0.69163	1	0.008811	0.198238	0.471366	0.740088	0.995595	0.004405	0.312775	0.53304	0.770925	0.991189	0.577093	0.229075	0.193833	0.075221	0.048673	0.013274	0.004405	0.176211	0.471366	0.69163	1	0.105727	0.365639	0.453744	0.784141	0.995595	0.264317	0.30837	0.546256	0.92511	0.977974	0.471366	0.415929	0.017621	0.361233	0.568282	0.806167	0.995595	0.321586
0.375167	0.381842	0.242991	0.284759	0.168449	0.167112	0.00267	0.214953	0.453939	0.75968	1	0.004005	0.23231	0.503338	0.739653	0.995995	0.001335	0.335113	0.544726	0.735648	0.99733	0.568758	0.130841	0.300401	0.045455	0.072193	0.002674	0.001335	0.158879	0.41522	0.728972	1	0.238985	0.424566	0.611482	0.731642	0.837116	0.004005	0.359146	0.558077	0.774366	0.949266	0.425901	0.339572	0.004005	0.325768	0.522029	0.732977	0.99733	0.421896
0.33377	0.328534	0.337696	0.195282	0.242464	0.241153	0.002618	0.294503	0.526178	0.756545	0.998691	0.005236	0.240838	0.469895	0.751309	1	0.001309	0.222513	0.497382	0.740838	0.997382	0.467277	0.218586	0.314136	0.087811	0.058978	0.001311	0.001309	0.21466	0.441099	0.727749	1	0.040576	0.153141	0.498691	0.820681	0.997382	0.006545	0.328534	0.531414	0.710733	0.990838	0.574607	0.40367	0.003927	0.239529	0.472513	0.744764	0.997382	0.337696
0.316857	0.290241	0.392902	0.182741	0.27665	0.248731	0.002535	0.268695	0.52218	0.754119	0.997465	0.00507	0.226869	0.484157	0.740177	0.998733	0.001267	0.253485	0.498099	0.742712	1	0.463878	0.240811	0.295311	0.098985	0.060914	0.002538	0.001267	0.206591	0.447402	0.746515	1	0.03929	0.200253	0.423321	0.797212	0.997465	0.006337	0.323194	0.542459	0.700887	0.989861	0.57161	0.385787	0.003802	0.268695	0.47782	0.740177	0.996198	0.342205
0.340278	0.399306	0.260417	0.273043	0.144348	0.203478	0.005208	0.199653	0.418403	0.708333	0.994792	0.006944	0.248264	0.522569	0.743056	0.996528	0.001736	0.309028	0.567708	0.776042	1	0.539931	0.125	0.335069	0.048696	0.086957	0.003478	0.001736	0.164931	0.34375	0.637153	1	0.236111	0.571181	0.696181	0.871528	0.960069	0.005208	0.380208	0.588542	0.791667	0.991319	0.520833	0.365217	0.008681	0.322917	0.538194	0.743056	0.986111	0.432292
0.424125	0.202335	0.373541	0.175781	0.304688	0.152344	0.015564	0.249027	0.529183	0.758755	1	0.007782	0.159533	0.44358	0.642023	0.941634	0.003891	0.264591	0.501946	0.77821	0.980545	0.463035	0.307393	0.229572	0.125	0.054688	0	0.003891	0.284047	0.509728	0.747082	1	0.11284	0.229572	0.451362	0.715953	0.902724	0.007782	0.077821	0.494163	0.77821	0.953307	0.486381	0.40625	0.019455	0.303502	0.486381	0.743191	0.961089	0.217899
0.414414	0.283784	0.301802	0.257919	0.20362	0.18552	0.009009	0.265766	0.481982	0.783784	0.990991	0.013514	0.220721	0.536036	0.761261	0.986486	0.004505	0.207207	0.459459	0.671171	1	0.342342	0.063063	0.594595	0.027149	0.099548	0	0.004505	0.292793	0.378378	0.675676	1	0.603604	0.612613	0.630631	0.657658	0.684685	0.022523	0.225225	0.495495	0.774775	0.986486	0.481982	0.479638	0.013514	0.225225	0.486486	0.72973	0.986486	0.297297
0.349425	0.331034	0.31954	0.214039	0.242808	0.218642	0.002299	0.26092	0.512644	0.742529	1	0.004598	0.231034	0.5	0.758621	0.996552	0.001149	0.235632	0.482759	0.74023	0.997701	0.488506	0.226437	0.285057	0.097814	0.058688	0.003452	0.001149	0.217241	0.473563	0.732184	1	0.035632	0.248276	0.48046	0.808046	0.997701	0.005747	0.296552	0.578161	0.728736	0.993103	0.544828	0.393556	0.003448	0.250575	0.465517	0.748276	0.997701	0.364368
0.455263	0.357895	0.186842	0.248021	0.131926	0.163588	0.026316	0.292105	0.536842	0.668421	0.994737	0.013158	0.223684	0.434211	0.739474	0.997368	0.002632	0.181579	0.647368	0.828947	1	0.634211	0.094737	0.271053	0.042216	0.068602	0.005277	0.002632	0.278947	0.471053	0.678947	1	0.007895	0.697368	0.784211	0.855263	0.965789	0.026316	0.089474	0.378947	0.728947	0.986842	0.278947	0.28496	0.010526	0.289474	0.689474	0.810526	0.992105	0.439474
0.428317	0.385574	0.186109	0.303922	0.176471	0.123886	0.003562	0.259127	0.524488	0.771149	1	0.002671	0.215494	0.481745	0.71772	0.996438	0.00089	0.274265	0.482636	0.726625	0.99911	0.734639	0.097061	0.168299	0.048128	0.051693	0	0.00089	0.191451	0.394479	0.685663	1	0.065895	0.43366	0.58504	0.657168	0.966162	0.184328	0.545859	0.802315	0.881567	0.998219	0.398931	0.367201	0.010686	0.198575	0.446126	0.689225	0.99911	0.423865
0.376605	0.356633	0.266762	0.27	0.215714	0.174286	0.005706	0.268188	0.520685	0.761769	0.99572	0.002853	0.201141	0.445078	0.740371	1	0.001427	0.339515	0.536377	0.743224	0.998573	0.620542	0.135521	0.243937	0.065714	0.057143	0.005714	0.001427	0.225392	0.472183	0.733238	1	0.039943	0.373752	0.579173	0.825963	0.951498	0.054208	0.360913	0.529244	0.774608	0.998573	0.422254	0.402857	0.007133	0.266762	0.479315	0.699001	0.994294	0.39515
0.311239	0.380403	0.308357	0.24531	0.151515	0.251082	0.004323	0.259366	0.505764	0.769452	1	0.002882	0.262248	0.534582	0.755043	0.997118	0.001441	0.223343	0.458213	0.71902	0.962536	0.476945	0.231988	0.291066	0.079365	0.056277	0.004329	0.001441	0.211816	0.43804	0.817003	1	0.025937	0.148415	0.423631	0.827089	0.933718	0.021614	0.40634	0.587896	0.736311	0.814121	0.518732	0.334776	0.014409	0.262248	0.471182	0.713256	0.933718	0.365994
0.360444	0.391867	0.247689	0.261111	0.164815	0.216667	0.018484	0.232902	0.513863	0.735675	0.998152	0.003697	0.292052	0.504621	0.772643	0.994455	0.001848	0.195933	0.438078	0.720887	1	0.735675	0.110906	0.15342	0.064815	0.05	0.001852	0.001848	0.266174	0.48244	0.744917	1	0.005545	0.19963	0.608133	0.669131	0.863216	0.018484	0.12939	0.550832	0.946396	0.990758	0.380776	0.396296	0.007394	0.25878	0.55268	0.783734	0.992606	0.414048
0.304553	0.414443	0.281005	0.215409	0.168239	0.254717	0.006279	0.194662	0.4427	0.816327	0.99529	0.00314	0.262166	0.511774	0.682889	1	0.00157	0.260597	0.510204	0.77865	0.99686	0.637363	0.139717	0.22292	0.06761	0.064465	0.001572	0.00157	0.21978	0.527473	0.693878	1	0.100471	0.277865	0.425432	0.850863	0.981162	0.023548	0.232339	0.44898	0.77865	0.956044	0.544741	0.279874	0.015699	0.362637	0.583987	0.728414	0.99686	0.437991
0.453634	0.310777	0.235589	0.271357	0.201005	0.150754	0.010025	0.275689	0.516291	0.769424	0.994987	0.005013	0.172932	0.403509	0.724311	0.987469	0.002506	0.295739	0.546366	0.744361	1	0.536341	0.037594	0.426065	0.022613	0.082915	0.002513	0.002506	0.150376	0.365915	0.558897	1	0.152882	0.157895	0.699248	0.949875	0.974937	0.007519	0.398496	0.654135	0.814536	0.969925	0.37594	0.38191	0.007519	0.303258	0.528822	0.719298	0.992481	0.35589
0.392135	0.267416	0.340449	0.208099	0.271091	0.1991	0.004494	0.17191	0.408989	0.721348	0.998876	0.002247	0.295506	0.519101	0.793258	0.988764	0.001124	0.303371	0.540449	0.766292	1	0.333708	0.094382	0.57191	0.035996	0.094488	0.008999	0.001124	0.224719	0.41573	0.810112	1	0.053933	0.330337	0.742697	0.907865	0.988764	0.003371	0.25618	0.486517	0.704494	0.997753	0.558427	0.418448	0.003371	0.34382	0.546067	0.766292	0.996629	0.28764
0.375291	0.393939	0.230769	0.281214	0.165694	0.187865	0.003497	0.20979	0.446387	0.738928	1	0.002331	0.248252	0.509324	0.748252	0.987179	0.001166	0.332168	0.559441	0.754079	0.995338	0.486014	0.16317	0.350816	0.05951	0.087515	0.001167	0.001166	0.213287	0.441725	0.719114	1	0.003497	0.399767	0.614219	0.784382	0.924242	0.017483	0.270396	0.497669	0.744755	0.986014	0.351981	0.289382	0.002331	0.367133	0.55711	0.778555	0.987179	0.437063
0.361905	0.257143	0.380952	0.153846	0.269231	0.144231	0.057143	0.180952	0.533333	0.780952	0.971429	0.019048	0.285714	0.485714	0.67619	1	0.009524	0.209524	0.47619	0.704762	0.990476	0.438095	0.561905	0	0.173077	0	0	0.009524	0.27619	0.533333	0.790476	1	0.019048	0.190476	0.409524	0.704762	0.980952	0	0	0	0	0	0.390476	0.519231	0.019048	0.209524	0.457143	0.704762	0.980952	0.257143
0.294118	0.372549	0.333333	0.16	0.18	0.32	0.058824	0.215686	0.54902	0.823529	1	0.039216	0.196078	0.509804	0.72549	0.980392	0.019608	0.176471	0.372549	0.529412	0.941176	0.470588	0.27451	0.254902	0.08	0.12	0	0.019608	0.196078	0.509804	0.843137	1	0.058824	0.098039	0.313725	0.372549	0.45098	0.529412	0.568627	0.627451	0.686275	0.901961	0.45098	0.4	0.078431	0.294118	0.411765	0.588235	0.941176	0.431373
0.376045	0.328691	0.295265	0.27095	0.187151	0.192737	0.008357	0.275766	0.451253	0.771588	0.997214	0.005571	0.253482	0.551532	0.752089	0.988858	0.002786	0.200557	0.512535	0.682451	1	0.523677	0.178273	0.29805	0.053073	0.075419	0.00838	0.002786	0.337047	0.512535	0.793872	1	0.052925	0.116992	0.654596	0.777159	0.86351	0.019499	0.222841	0.328691	0.626741	0.980501	0.389972	0.357542	0.013928	0.200557	0.392758	0.668524	0.994429	0.37883
0.394231	0.288462	0.317308	0.262136	0.184466	0.262136	0.048077	0.259615	0.528846	0.701923	0.961538	0.019231	0.192308	0.5	0.759615	0.990385	0.009615	0.221154	0.451923	0.711538	1	0.375	0.201923	0.423077	0.097087	0.07767	0	0.009615	0.201923	0.519231	0.865385	1	0.173077	0.442308	0.490385	0.740385	0.817308	0.048077	0.144231	0.394231	0.605769	0.971154	0.442308	0.466019	0.028846	0.240385	0.471154	0.721154	0.971154	0.307692
0.344538	0.367647	0.287815	0.242105	0.2	0.185263	0.004202	0.25	0.476891	0.743697	0.995798	0.008403	0.228992	0.491597	0.726891	1	0.002101	0.258403	0.537815	0.773109	0.968487	0.558824	0.197479	0.243697	0.067368	0.054737	0	0.002101	0.231092	0.497899	0.741597	1	0.056723	0.210084	0.409664	0.82563	0.968487	0.079832	0.359244	0.548319	0.75	0.995798	0.47479	0.353684	0.014706	0.310924	0.533613	0.756303	0.970588	0.380252
0.413665	0.335404	0.250932	0.247512	0.18408	0.177861	0.004969	0.204969	0.490683	0.715528	1	0.002484	0.264596	0.493168	0.762733	0.996273	0.001242	0.309317	0.546584	0.744099	0.997516	0.565217	0.122981	0.311801	0.044776	0.069652	0.004975	0.001242	0.160248	0.356522	0.715528	1	0.032298	0.424845	0.614907	0.745342	0.991304	0.045963	0.382609	0.583851	0.802484	0.980124	0.419876	0.318408	0.040994	0.326708	0.50559	0.744099	0.997516	0.385093
0.462451	0.359684	0.177866	0.345238	0.150794	0.107143	0.011858	0.209486	0.466403	0.747036	1	0.007905	0.316206	0.533597	0.727273	0.988142	0.003953	0.193676	0.347826	0.743083	0.956522	0.758893	0.146245	0.094862	0.047619	0.031746	0.015873	0.003953	0.312253	0.549407	0.73913	1	0.106719	0.150198	0.201581	0.324111	0.391304	0.245059	0.379447	0.841897	0.865613	0.928854	0.343874	0.293651	0.110672	0.241107	0.43083	0.798419	0.956522	0.367589
0.385542	0.289157	0.325301	0.231707	0.256098	0.146341	0.072289	0.313253	0.554217	0.759036	0.927711	0.060241	0.349398	0.638554	0.915663	1	0.012048	0.144578	0.277108	0.518072	0.843373	0.385542	0.313253	0.301205	0.121951	0.04878	0	0.012048	0.313253	0.481928	0.903614	1	0.024096	0.084337	0.240964	0.349398	0.506024	0.53012	0.590361	0.662651	0.771084	0.855422	0.349398	0.414634	0.024096	0.168675	0.385542	0.518072	0.915663	0.301205
0.335714	0.371429	0.292857	0.223022	0.223022	0.201439	0.035714	0.178571	0.421429	0.692857	0.957143	0.014286	0.264286	0.45	0.721429	1	0.007143	0.25	0.557143	0.75	0.971429	0.514286	0.135714	0.35	0.043165	0.071942	0	0.007143	0.192857	0.371429	0.707143	1	0.207143	0.228571	0.464286	0.5	0.771429	0.042857	0.557143	0.642857	0.85	0.942857	0.421429	0.316547	0.021429	0.25	0.585714	0.757143	0.971429	0.371429
0.328704	0.351852	0.319444	0.176744	0.255814	0.213953	0.018519	0.259259	0.453704	0.722222	1	0.009259	0.171296	0.578704	0.796296	0.990741	0.00463	0.277778	0.458333	0.666667	0.986111	0.472222	0.407407	0.12037	0.111628	0.037209	0	0.00463	0.273148	0.564815	0.824074	1	0.023148	0.310185	0.481481	0.634259	0.861111	0.087963	0.111111	0.240741	0.657407	0.921296	0.425926	0.465116	0.027778	0.25463	0.453704	0.685185	0.986111	0.425926
0.383065	0.245968	0.370968	0.174089	0.283401	0.198381	0.012097	0.258065	0.528226	0.802419	1	0.028226	0.205645	0.459677	0.677419	0.995968	0.004032	0.237903	0.487903	0.71371	0.979839	0.383065	0.197581	0.419355	0.05668	0.089069	0.008097	0.004032	0.165323	0.419355	0.693548	1	0.133065	0.314516	0.403226	0.620968	0.725806	0.024194	0.266129	0.524194	0.83871	0.987903	0.568548	0.421053	0.016129	0.237903	0.46371	0.677419	0.979839	0.258065
0.427123	0.328264	0.244613	0.269036	0.168782	0.170051	0.010139	0.188847	0.564005	0.81749	1	0.002535	0.237009	0.47782	0.716096	0.996198	0.001267	0.30545	0.453739	0.65019	0.988593	0.528517	0.105196	0.366286	0.040609	0.098985	0.005076	0.001267	0.157161	0.466413	0.813688	1	0.007605	0.343473	0.471483	0.590621	0.752852	0.021546	0.328264	0.543726	0.727503	0.975919	0.387833	0.294416	0.003802	0.304183	0.448669	0.619772	0.993663	0.380228
0.372093	0.302326	0.325581	0.341176	0.211765	0.176471	0.034884	0.244186	0.523256	0.732558	1	0.023256	0.162791	0.395349	0.651163	0.988372	0.011628	0.313953	0.534884	0.755814	0.965116	0.348837	0.244186	0.406977	0.094118	0.047059	0	0.011628	0.244186	0.418605	0.906977	1	0.046512	0.337209	0.44186	0.5	0.604651	0.081395	0.162791	0.686047	0.790698	0.895349	0.430233	0.423529	0.046512	0.290698	0.453488	0.686047	0.965116	0.337209
0.359081	0.335073	0.305846	0.238245	0.212121	0.211076	0.003132	0.228601	0.461378	0.713987	1	0.004175	0.245303	0.505219	0.755741	0.998956	0.001044	0.276618	0.524008	0.77453	0.997912	0.460334	0.228601	0.311065	0.08255	0.059561	0.007315	0.001044	0.267223	0.461378	0.740084	1	0.006263	0.308977	0.512526	0.7881	0.968685	0.009395	0.192067	0.605428	0.755741	0.878914	0.530271	0.342738	0.007307	0.262004	0.524008	0.742171	0.982255	0.348643
0.366667	0.406667	0.226667	0.255034	0.187919	0.187919	0.02	0.14	0.38	0.72	0.993333	0.013333	0.373333	0.553333	0.74	0.966667	0.006667	0.246667	0.42	0.713333	1	0.533333	0.273333	0.193333	0.107383	0.040268	0	0.006667	0.16	0.46	0.753333	1	0.026667	0.28	0.366667	0.693333	0.886667	0.146667	0.566667	0.613333	0.766667	0.82	0.44	0.348993	0.026667	0.34	0.533333	0.726667	0.946667	0.413333
0.286371	0.502297	0.211332	0.216258	0.130368	0.187117	0.009188	0.165391	0.349158	0.575804	0.996937	0.003063	0.385911	0.601838	0.784074	1	0.001531	0.229709	0.41807	0.727412	0.993874	0.75804	0.056662	0.185299	0.027607	0.030675	0.003067	0.001531	0.304747	0.578867	0.784074	1	0.047473	0.211332	0.266462	0.316998	0.709035	0.070444	0.160796	0.333844	0.477795	0.911179	0.431853	0.328221	0.01072	0.267994	0.520674	0.686064	0.993874	0.513017
0.356522	0.352174	0.291304	0.231441	0.218341	0.20524	0.008696	0.195652	0.53913	0.730435	1	0.03913	0.273913	0.426087	0.743478	0.986957	0.004348	0.282609	0.517391	0.76087	0.991304	0.434783	0.282609	0.282609	0.087336	0.061135	0.008734	0.004348	0.234783	0.430435	0.678261	1	0.013043	0.213043	0.547826	0.76087	0.978261	0.091304	0.286957	0.508696	0.721739	0.873913	0.6	0.384279	0.021739	0.282609	0.486957	0.708696	0.978261	0.334783
0.308989	0.382022	0.308989	0.259887	0.20904	0.259887	0.016854	0.235955	0.494382	0.831461	1	0.011236	0.314607	0.52809	0.719101	0.983146	0.005618	0.202247	0.426966	0.646067	0.966292	0.421348	0.38764	0.191011	0.158192	0.022599	0	0.005618	0.207865	0.573034	0.865169	1	0.050562	0.191011	0.488764	0.651685	0.97191	0.331461	0.370787	0.421348	0.792135	0.842697	0.438202	0.497175	0.022472	0.292135	0.477528	0.651685	0.955056	0.337079
0.373093	0.278779	0.348128	0.197222	0.265278	0.211111	0.004161	0.235784	0.507628	0.732316	1	0.002774	0.242718	0.460472	0.743412	0.998613	0.001387	0.259362	0.503467	0.753121	0.997226	0.436893	0.238558	0.324549	0.0875	0.059722	0.004167	0.001387	0.231623	0.43828	0.705964	1	0.074896	0.208044	0.47018	0.897365	0.997226	0.008322	0.327323	0.615811	0.754508	0.883495	0.532594	0.372222	0.005548	0.280166	0.499307	0.750347	0.997226	0.29681
0.298137	0.39929	0.302573	0.218472	0.175844	0.251332	0.002662	0.24756	0.515528	0.738243	0.997338	0.001775	0.273292	0.516415	0.755989	1	0.000887	0.222715	0.463177	0.753327	0.992014	0.470275	0.171251	0.358474	0.087922	0.07016	0.002664	0.000887	0.193434	0.488909	0.740018	1	0.007986	0.200532	0.416149	0.748891	0.994676	0.04614	0.345164	0.571429	0.781721	0.968944	0.512866	0.40675	0.003549	0.262644	0.512866	0.762201	0.992014	0.404614
0.346304	0.451362	0.202335	0.269531	0.140625	0.167969	0.011673	0.256809	0.490272	0.766537	1	0.007782	0.303502	0.548638	0.801556	0.996109	0.003891	0.124514	0.420233	0.603113	0.856031	0.470817	0.151751	0.377432	0.070312	0.085938	0	0.003891	0.29572	0.513619	0.836576	1	0.015564	0.124514	0.175097	0.276265	0.828794	0.062257	0.412451	0.622568	0.731518	0.980545	0.396887	0.335938	0.019455	0.206226	0.420233	0.634241	0.964981	0.466926
0.374384	0.310345	0.315271	0.2357	0.247535	0.206114	0.004926	0.202956	0.439409	0.743842	0.99803	0.00197	0.234483	0.528079	0.745813	0.993103	0.000985	0.320197	0.538916	0.759606	1	0.470936	0.110345	0.418719	0.043393	0.092702	0.003945	0.000985	0.151724	0.433498	0.771429	1	0.008867	0.525123	0.611823	0.93399	0.994089	0.003941	0.298522	0.482759	0.707389	0.99803	0.430542	0.386588	0.003941	0.357635	0.551724	0.738916	0.996059	0.358621
0.374233	0.312883	0.312883	0.234568	0.234568	0.203704	0.042945	0.226994	0.546012	0.797546	0.993865	0.018405	0.269939	0.503067	0.717791	1	0.006135	0.196319	0.453988	0.705521	0.97546	0.392638	0.165644	0.441718	0.080247	0.104938	0.018519	0.006135	0.282209	0.564417	0.754601	1	0.018405	0.196319	0.263804	0.343558	0.760736	0.02454	0.380368	0.539877	0.840491	0.98773	0.607362	0.333333	0.01227	0.257669	0.478528	0.687117	0.97546	0.343558
0.323432	0.369637	0.306931	0.198347	0.178512	0.213223	0.00495	0.171617	0.39934	0.689769	0.990099	0.024752	0.339934	0.544554	0.825083	1	0.00165	0.252475	0.521452	0.727723	0.9967	0.580858	0.189769	0.229373	0.07438	0.041322	0.004959	0.00165	0.290429	0.478548	0.778878	1	0.059406	0.234323	0.524752	0.706271	0.966997	0.014851	0.19637	0.556106	0.744224	0.9967	0.5	0.390083	0.049505	0.280528	0.521452	0.762376	0.99505	0.412541
0.328244	0.332061	0.339695	0.187739	0.214559	0.226054	0.007634	0.244275	0.515267	0.767176	1	0.015267	0.206107	0.431298	0.71374	0.98855	0.003817	0.263359	0.48855	0.721374	0.996183	0.381679	0.187023	0.431298	0.05364	0.099617	0	0.003817	0.20229	0.423664	0.683206	1	0.125954	0.301527	0.39313	0.614504	0.71374	0.022901	0.255725	0.515267	0.832061	0.992366	0.553435	0.40613	0.030534	0.225191	0.442748	0.641221	0.98855	0.335878
0.389831	0.336158	0.274011	0.271955	0.229462	0.164306	0.016949	0.248588	0.471751	0.737288	1	0.00565	0.279661	0.550847	0.779661	0.997175	0.002825	0.206215	0.463277	0.683616	0.99435	0.562147	0.163842	0.274011	0.062323	0.056657	0.005666	0.002825	0.30791	0.528249	0.816384	1	0.090395	0.149718	0.542373	0.70339	0.799435	0.016949	0.234463	0.347458	0.728814	0.867232	0.412429	0.373938	0.025424	0.228814	0.432203	0.686441	0.988701	0.384181
0.341176	0.382353	0.276471	0.248521	0.236686	0.218935	0.023529	0.276471	0.582353	0.841176	0.994118	0.011765	0.170588	0.441176	0.705882	1	0.005882	0.205882	0.411765	0.7	0.970588	0.376471	0.170588	0.452941	0.059172	0.08284	0	0.005882	0.141176	0.364706	0.582353	1	0.023529	0.058824	0.335294	0.4	0.805882	0.135294	0.441176	0.688235	0.852941	0.988235	0.417647	0.508876	0.029412	0.229412	0.441176	0.717647	0.970588	0.417647
0.299363	0.464968	0.235669	0.288462	0.185897	0.217949	0.012739	0.133758	0.382166	0.636943	0.961783	0.050955	0.273885	0.528662	0.808917	1	0.006369	0.363057	0.55414	0.719745	0.942675	0.630573	0.165605	0.203822	0.051282	0.064103	0.012821	0.006369	0.165605	0.324841	0.579618	1	0.11465	0.503185	0.757962	0.796178	0.942675	0.019108	0.535032	0.636943	0.859873	0.980892	0.394904	0.397436	0.019108	0.261146	0.484076	0.713376	0.942675	0.471338
0.386831	0.308642	0.304527	0.235537	0.210744	0.202479	0.012346	0.213992	0.481481	0.72428	0.99177	0.00823	0.246914	0.563786	0.798354	0.995885	0.004115	0.263374	0.45679	0.716049	1	0.329218	0.082305	0.588477	0.033058	0.107438	0	0.004115	0.176955	0.44856	0.794239	1	0.45679	0.781893	0.835391	0.855967	0.884774	0.041152	0.26749	0.473251	0.63786	0.975309	0.485597	0.347107	0.045267	0.259259	0.45679	0.654321	0.971193	0.325103
0.296748	0.52439	0.178862	0.310204	0.126531	0.155102	0.01626	0.321138	0.528455	0.756098	1	0.00813	0.191057	0.504065	0.764228	0.987805	0.004065	0.296748	0.443089	0.601626	0.995935	0.833333	0.146341	0.020325	0.061224	0.012245	0.004082	0.004065	0.207317	0.544715	0.780488	1	0.276423	0.333333	0.443089	0.5	0.926829	0.268293	0.268293	0.272358	0.609756	0.617886	0.654472	0.253061	0.00813	0.166667	0.386179	0.752033	0.995935	0.556911
0.403226	0.33871	0.258065	0.275676	0.194595	0.221622	0.016129	0.22043	0.505376	0.817204	1	0.010753	0.236559	0.456989	0.715054	0.973118	0.005376	0.344086	0.516129	0.72043	0.983871	0.333333	0.11828	0.548387	0.07027	0.07027	0.005405	0.005376	0.112903	0.446237	0.693548	1	0.043011	0.064516	0.473118	0.763441	0.822581	0.188172	0.317204	0.564516	0.844086	0.983871	0.408602	0.4	0.048387	0.408602	0.553763	0.752688	0.983871	0.360215
0.398827	0.313783	0.28739	0.255882	0.235294	0.197059	0.017595	0.272727	0.504399	0.83871	1	0.005865	0.28739	0.560117	0.747801	0.970674	0.002933	0.178886	0.428152	0.648094	0.941349	0.390029	0.202346	0.407625	0.064706	0.052941	0.011765	0.002933	0.222874	0.636364	0.900293	1	0.02346	0.105572	0.240469	0.656891	0.806452	0.143695	0.331378	0.44868	0.71261	0.868035	0.439883	0.452941	0.008798	0.211144	0.472141	0.674487	0.970674	0.343109
0.355072	0.456522	0.188406	0.321168	0.124088	0.175182	0.014493	0.253623	0.557971	0.775362	1	0.028986	0.195652	0.550725	0.753623	0.992754	0.007246	0.231884	0.405797	0.492754	0.985507	0.753623	0.094203	0.152174	0.058394	0.058394	0.014599	0.007246	0.188406	0.565217	0.753623	1	0.398551	0.413043	0.543478	0.855072	0.978261	0.217391	0.268116	0.304348	0.463768	0.847826	0.268116	0.277372	0.036232	0.333333	0.456522	0.536232	0.985507	0.485507
0.346626	0.297546	0.355828	0.252308	0.246154	0.209231	0.015337	0.257669	0.493865	0.766871	0.98773	0.006135	0.315951	0.54908	0.730061	0.996933	0.003067	0.205521	0.46319	0.733129	1	0.52454	0.288344	0.187117	0.104615	0.049231	0.012308	0.003067	0.248466	0.530675	0.794479	1	0.009202	0.282209	0.555215	0.717791	0.92638	0.033742	0.101227	0.389571	0.52454	0.993865	0.515337	0.387692	0.01227	0.322086	0.518405	0.757669	0.993865	0.297546
0.385827	0.333071	0.281102	0.257683	0.22695	0.193065	0.007087	0.251181	0.491339	0.740157	1	0.001575	0.233071	0.514961	0.751969	0.998425	0.000787	0.258268	0.500787	0.751181	0.99685	0.414173	0.192126	0.393701	0.081166	0.08747	0.00394	0.000787	0.229921	0.520472	0.774803	1	0.00315	0.211024	0.43622	0.689764	0.969291	0.007087	0.284252	0.508661	0.755906	0.985039	0.414961	0.49015	0.00315	0.252756	0.50315	0.759843	0.99685	0.351969
0.359223	0.325243	0.315534	0.190244	0.253659	0.209756	0.009709	0.218447	0.456311	0.786408	1	0.014563	0.247573	0.524272	0.76699	0.970874	0.004854	0.271845	0.475728	0.674757	0.956311	0.417476	0.398058	0.184466	0.117073	0.068293	0.009756	0.004854	0.378641	0.650485	0.81068	1	0.009709	0.174757	0.402913	0.572816	0.849515	0.072816	0.208738	0.533981	0.883495	0.956311	0.378641	0.409756	0.014563	0.213592	0.427184	0.621359	0.956311	0.320388
0.216931	0.582011	0.201058	0.260638	0.079787	0.244681	0.015873	0.079365	0.365079	0.592593	0.883598	0.010582	0.301587	0.539683	0.78836	1	0.005291	0.222222	0.455026	0.719577	0.989418	0.878307	0.037037	0.084656	0.021277	0.021277	0	0.005291	0.26455	0.560847	0.777778	1	0.153439	0.153439	0.164021	0.312169	0.322751	0.201058	0.216931	0.42328	0.444444	0.465608	0.359788	0.276596	0.10582	0.253968	0.359788	0.619048	0.989418	0.619048
0.378641	0.300971	0.320388	0.196078	0.254902	0.186275	0.048544	0.213592	0.446602	0.669903	0.990291	0.058252	0.262136	0.495146	0.815534	1	0.009709	0.15534	0.466019	0.68932	0.941748	0.378641	0.417476	0.203883	0.137255	0.039216	0	0.009709	0.242718	0.427184	0.815534	1	0.019417	0.281553	0.621359	0.776699	0.941748	0.145631	0.184466	0.446602	0.495146	0.553398	0.485437	0.372549	0.019417	0.291262	0.592233	0.776699	0.951456	0.252427
0.383178	0.35514	0.261682	0.28169	0.234742	0.201878	0.014019	0.219626	0.528037	0.775701	0.995327	0.009346	0.285047	0.5	0.724299	1	0.004673	0.228972	0.481308	0.682243	0.990654	0.415888	0.116822	0.46729	0.056338	0.103286	0	0.004673	0.191589	0.476636	0.682243	1	0.158879	0.182243	0.228972	0.285047	0.607477	0.056075	0.392523	0.635514	0.803738	0.985981	0.565421	0.347418	0.018692	0.247664	0.429907	0.602804	0.915888	0.32243
0.367965	0.324675	0.307359	0.208696	0.265217	0.217391	0.012987	0.272727	0.502165	0.718615	1	0.008658	0.212121	0.484848	0.757576	0.987013	0.004329	0.225108	0.489177	0.748918	0.995671	0.376623	0.233766	0.38961	0.086957	0.052174	0	0.004329	0.225108	0.489177	0.831169	1	0.04329	0.251082	0.497835	0.731602	0.965368	0.116883	0.207792	0.467532	0.649351	0.874459	0.532468	0.452174	0.021645	0.229437	0.515152	0.748918	0.969697	0.320346
0.364764	0.291563	0.343672	0.231056	0.265839	0.206211	0.008685	0.272953	0.524814	0.76799	0.996278	0.007444	0.229529	0.473945	0.738213	0.993797	0.001241	0.234491	0.490074	0.745658	1	0.483871	0.225806	0.290323	0.098137	0.053416	0.001242	0.001241	0.208437	0.452854	0.735732	1	0.004963	0.186104	0.431762	0.815136	0.96402	0.008685	0.333747	0.555831	0.709677	0.995037	0.575682	0.402484	0.002481	0.263027	0.48139	0.744417	0.996278	0.291563
0.445652	0.206522	0.347826	0.175824	0.318681	0.153846	0.021739	0.206522	0.5	0.76087	1	0.119565	0.326087	0.554348	0.684783	0.891304	0.01087	0.195652	0.413043	0.73913	0.956522	0.423913	0.521739	0.054348	0.10989	0.021978	0.021978	0.01087	0.26087	0.48913	0.717391	1	0.065217	0.336957	0.521739	0.771739	0.978261	0.054348	0.054348	0.086957	0.097826	0.119565	0.369565	0.505495	0.065217	0.26087	0.478261	0.728261	0.967391	0.195652
0.4	0.295652	0.304348	0.245614	0.236842	0.140351	0.017391	0.234783	0.495652	0.756522	1	0.026087	0.243478	0.513043	0.782609	0.965217	0.008696	0.2	0.391304	0.686957	0.852174	0.347826	0.269565	0.382609	0.070175	0.070175	0.017544	0.008696	0.295652	0.486957	0.843478	1	0.034783	0.086957	0.417391	0.530435	0.8	0.13913	0.226087	0.634783	0.756522	0.956522	0.452174	0.403509	0.034783	0.2	0.452174	0.678261	0.913043	0.304348
0.411205	0.479915	0.108879	0.299471	0.100529	0.078307	0.002114	0.204017	0.464059	0.729387	0.998943	0.003171	0.352008	0.57611	0.764271	1	0.001057	0.071882	0.149049	0.654334	0.995772	0.88055	0.01797	0.10148	0.008466	0.02328	0	0.001057	0.312896	0.538055	0.757928	1	0.088795	0.091966	0.504228	0.818182	0.831924	0.020085	0.056025	0.106765	0.137421	0.984144	0.086681	0.10582	0.004228	0.05814	0.096195	0.480973	0.990486	0.48203
0.431373	0.313725	0.254902	0.257426	0.257426	0.128713	0.019608	0.22549	0.45098	0.803922	0.990196	0.039216	0.323529	0.568627	0.696078	1	0.009804	0.137255	0.470588	0.77451	0.95098	0.264706	0.460784	0.27451	0.079208	0.039604	0	0.009804	0.147059	0.784314	0.931373	1	0.019608	0.362745	0.480392	0.617647	0.901961	0.156863	0.215686	0.284314	0.705882	0.77451	0.470588	0.39604	0.039216	0.215686	0.480392	0.696078	0.892157	0.323529
0.351946	0.368866	0.279188	0.262712	0.205085	0.20678	0.003384	0.169205	0.423012	0.690355	0.998308	0.006768	0.307953	0.558376	0.778342	1	0.001692	0.277496	0.507614	0.771574	0.98308	0.516074	0.245347	0.238579	0.09661	0.049153	0.005085	0.001692	0.260575	0.519459	0.763113	1	0.093063	0.279188	0.467005	0.780034	0.984772	0.01692	0.179357	0.582064	0.725888	0.947547	0.509306	0.359322	0.015228	0.331641	0.546531	0.783418	0.986464	0.387479
0.356164	0.383562	0.260274	0.282759	0.186207	0.2	0.041096	0.212329	0.506849	0.739726	0.972603	0.013699	0.239726	0.445205	0.712329	0.986301	0.006849	0.246575	0.59589	0.780822	1	0.486301	0.212329	0.30137	0.068966	0.055172	0	0.006849	0.267123	0.390411	0.650685	1	0.184932	0.458904	0.609589	0.80137	0.890411	0.034247	0.10274	0.541096	0.69863	0.965753	0.315068	0.441379	0.075342	0.438356	0.589041	0.760274	0.979452	0.363014
0.421687	0.212851	0.365462	0.185484	0.310484	0.177419	0.02008	0.269076	0.550201	0.767068	1	0.012048	0.196787	0.461847	0.694779	0.995984	0.004016	0.232932	0.453815	0.738956	0.97992	0.457831	0.309237	0.232932	0.133065	0.052419	0.004032	0.004016	0.261044	0.461847	0.714859	1	0.13253	0.285141	0.473896	0.726908	0.915663	0.02008	0.092369	0.526104	0.791165	0.967871	0.506024	0.419355	0.036145	0.305221	0.493976	0.738956	0.967871	0.240964
0.433333	0.288889	0.277778	0.258427	0.247191	0.168539	0.033333	0.244444	0.5	0.777778	1	0.022222	0.155556	0.444444	0.622222	0.988889	0.011111	0.222222	0.433333	0.688889	0.955556	0.177778	0	0.822222	0	0.067416	0	0.011111	0.044444	0.711111	0.755556	1	0	0	0	0	0	0.055556	0.244444	0.488889	0.688889	0.977778	0.322222	0.426966	0.077778	0.355556	0.555556	0.688889	0.955556	0.266667
0.318267	0.374765	0.306968	0.19434	0.19434	0.215094	0.024482	0.231638	0.442561	0.696798	0.992467	0.003766	0.20339	0.512241	0.764595	1	0.001883	0.293785	0.544256	0.777778	0.996234	0.517891	0.171375	0.310734	0.05283	0.090566	0.003774	0.001883	0.146893	0.423729	0.696798	1	0.099812	0.274953	0.704331	0.86064	0.932203	0.050847	0.39548	0.521657	0.734463	0.996234	0.514124	0.384906	0.00565	0.278719	0.517891	0.79096	0.996234	0.397363
0.359195	0.304598	0.336207	0.227666	0.239193	0.195965	0.017241	0.198276	0.465517	0.692529	0.997126	0.005747	0.247126	0.528736	0.775862	1	0.002874	0.264368	0.485632	0.747126	0.979885	0.347701	0.106322	0.545977	0.040346	0.080692	0.005764	0.002874	0.284483	0.471264	0.718391	1	0.393678	0.485632	0.738506	0.824713	0.933908	0.008621	0.206897	0.454023	0.706897	0.994253	0.534483	0.37464	0.008621	0.341954	0.551724	0.784483	0.991379	0.324713
0.396667	0.256667	0.346667	0.207358	0.230769	0.19398	0.01	0.276667	0.493333	0.74	1	0.016667	0.193333	0.476667	0.75	0.986667	0.003333	0.266667	0.5	0.76	0.993333	0.403333	0.25	0.346667	0.073579	0.053512	0	0.003333	0.203333	0.483333	0.7	1	0.02	0.18	0.5	0.77	0.933333	0.06	0.336667	0.536667	0.68	0.976667	0.556667	0.354515	0.016667	0.21	0.466667	0.71	0.986667	0.253333
0.38121	0.368251	0.25054	0.259459	0.180541	0.175135	0.00324	0.273218	0.548596	0.780778	1	0.00216	0.240821	0.519438	0.766739	0.99892	0.00108	0.242981	0.429806	0.645788	0.967603	0.509719	0.115551	0.37473	0.04973	0.088649	0.006486	0.00108	0.181425	0.555076	0.794816	1	0.008639	0.268898	0.37473	0.518359	0.862851	0.007559	0.285097	0.488121	0.704104	0.984881	0.407127	0.330811	0.006479	0.240821	0.414687	0.595032	0.993521	0.403888
0.348214	0.366071	0.285714	0.216216	0.18018	0.153153	0.044643	0.285714	0.508929	0.776786	0.991071	0.080357	0.214286	0.428571	0.625	1	0.008929	0.1875	0.535714	0.723214	0.928571	0.446429	0.205357	0.348214	0.09009	0.09009	0	0.008929	0.232143	0.401786	0.625	1	0.017857	0.053571	0.196429	0.571429	0.741071	0.276786	0.455357	0.660714	0.883929	0.973214	0.383929	0.378378	0.026786	0.196429	0.428571	0.696429	0.928571	0.392857
0.335893	0.414587	0.24952	0.298077	0.157692	0.221154	0.005758	0.295585	0.604607	0.827255	1	0.003839	0.232246	0.445298	0.731286	0.990403	0.001919	0.224568	0.454894	0.62572	0.998081	0.485605	0.049904	0.464491	0.026923	0.084615	0.003846	0.001919	0.222649	0.583493	0.848369	1	0.101727	0.111324	0.245681	0.602687	0.857965	0.015355	0.318618	0.477927	0.65643	0.953935	0.456814	0.342308	0.011516	0.245681	0.443378	0.612284	0.996161	0.397313
0.320482	0.40241	0.277108	0.252111	0.190591	0.230398	0.00241	0.268675	0.53012	0.76506	1	0.004819	0.240964	0.491566	0.744578	0.993976	0.001205	0.237349	0.478313	0.745783	0.996386	0.486747	0.228916	0.284337	0.101327	0.057901	0.002413	0.001205	0.213253	0.486747	0.742169	1	0.037349	0.206024	0.409639	0.750602	0.996386	0.006024	0.327711	0.571084	0.703614	0.991566	0.553012	0.393245	0.003614	0.246988	0.468675	0.722892	0.996386	0.473494
0.390909	0.236364	0.372727	0.229358	0.275229	0.155963	0.036364	0.2	0.518182	0.727273	1	0.018182	0.145455	0.381818	0.581818	0.981818	0.009091	0.3	0.527273	0.772727	0.990909	0.363636	0.263636	0.372727	0.082569	0.100917	0.009174	0.009091	0.127273	0.454545	0.763636	1	0.390909	0.481818	0.8	0.872727	0.963636	0.027273	0.181818	0.318182	0.590909	0.7	0.4	0.366972	0.045455	0.4	0.590909	0.854545	0.972727	0.245455
0.375427	0.38339	0.241183	0.225513	0.173121	0.166287	0.002275	0.292378	0.522184	0.74744	0.998862	0.015927	0.17975	0.409556	0.638225	0.997725	0.001138	0.301479	0.654152	0.821388	1	0.593857	0.035267	0.370876	0.019362	0.092255	0.007973	0.001138	0.220705	0.390216	0.546075	1	0.040956	0.094425	0.12628	0.229807	0.346985	0.012514	0.634812	0.761092	0.87372	0.992036	0.54835	0.394077	0.003413	0.226394	0.511945	0.757679	0.990899	0.362912
0.35	0.353846	0.296154	0.27027	0.204633	0.200772	0.011538	0.296154	0.511538	0.788462	1	0.007692	0.153846	0.426923	0.730769	0.980769	0.003846	0.292308	0.492308	0.734615	0.984615	0.5	0.361538	0.138462	0.138996	0.03861	0	0.003846	0.157692	0.534615	0.753846	1	0.115385	0.430769	0.584615	0.811538	0.980769	0.034615	0.165385	0.203846	0.246154	0.469231	0.5	0.393822	0.015385	0.265385	0.523077	0.765385	0.984615	0.361538
0.346908	0.315234	0.337858	0.21148	0.238671	0.234139	0.003017	0.269985	0.552036	0.775264	0.996983	0.004525	0.199095	0.434389	0.707391	1	0.001508	0.28356	0.514329	0.745098	0.998492	0.411765	0.162896	0.425339	0.070997	0.070997	0.004532	0.001508	0.26546	0.496229	0.822021	1	0.003017	0.182504	0.377074	0.886878	0.998492	0.027149	0.248869	0.527903	0.671192	0.924585	0.544495	0.392749	0.004525	0.250377	0.475113	0.711916	0.998492	0.33635
0.39823	0.348673	0.253097	0.237589	0.161348	0.159574	0.00531	0.306195	0.646018	0.861947	1	0.00354	0.20708	0.460177	0.715044	0.99115	0.00177	0.235398	0.40708	0.575221	0.943363	0.60354	0.166372	0.230088	0.051418	0.065603	0.005319	0.00177	0.307965	0.688496	0.838938	1	0.00531	0.215929	0.338053	0.578761	0.642478	0.030088	0.230088	0.4	0.486726	0.906195	0.361062	0.283688	0.00708	0.20708	0.366372	0.523894	0.688496	0.380531
0.291262	0.395071	0.313667	0.227952	0.162182	0.247384	0.001494	0.26587	0.494399	0.752054	0.992532	0.002987	0.231516	0.474235	0.734877	0.999253	0.000747	0.246453	0.525019	0.754294	1	0.533234	0.394324	0.072442	0.130045	0.028401	0.005979	0.000747	0.256161	0.480956	0.716953	1	0.00224	0.228529	0.485437	0.722928	0.932786	0.003734	0.373413	0.93652	0.970127	0.994025	0.619119	0.300448	0.00224	0.245706	0.49888	0.755041	0.998506	0.436146
0.417949	0.384615	0.197436	0.291702	0.160821	0.144568	0.002564	0.189744	0.475214	0.715385	1	0.001709	0.246154	0.457265	0.724786	0.998291	0.000855	0.387179	0.582906	0.829915	0.999145	0.680342	0.123077	0.196581	0.051326	0.047904	0.003422	0.000855	0.201709	0.45812	0.717949	1	0.113675	0.406838	0.638462	0.907692	0.977778	0.11453	0.392308	0.511966	0.744444	0.994872	0.365812	0.328486	0.008547	0.37094	0.567521	0.84359	0.999145	0.429915
0.502222	0.297778	0.2	0.245536	0.205357	0.111607	0.017778	0.182222	0.444444	0.733333	1	0.008889	0.271111	0.502222	0.866667	0.982222	0.004444	0.364444	0.528889	0.684444	0.995556	0.471111	0.102222	0.426667	0.035714	0.089286	0	0.004444	0.222222	0.373333	0.622222	1	0.342222	0.36	0.506667	0.657778	0.684444	0.017778	0.151111	0.635556	0.808889	0.991111	0.266667	0.267857	0.04	0.4	0.528889	0.742222	0.982222	0.351111
0.389655	0.310345	0.3	0.269896	0.217993	0.17301	0.013793	0.227586	0.489655	0.768966	1	0.010345	0.258621	0.531034	0.827586	0.996552	0.003448	0.237931	0.475862	0.665517	0.965517	0.503448	0.251724	0.244828	0.117647	0.062284	0	0.003448	0.265517	0.534483	0.831034	1	0.113793	0.237931	0.396552	0.610345	0.768966	0.02069	0.093103	0.524138	0.796552	0.92069	0.444828	0.373702	0.031034	0.265517	0.424138	0.634483	0.982759	0.355172
0.493056	0.25	0.256944	0.300699	0.216783	0.090909	0.020833	0.166667	0.465278	0.770833	0.993056	0.013889	0.25	0.555556	0.743056	0.9375	0.006944	0.326389	0.479167	0.638889	1	0.597222	0.3125	0.090278	0.111888	0.027972	0	0.006944	0.145833	0.520833	0.819444	1	0.159722	0.270833	0.402778	0.527778	0.798611	0.673611	0.6875	0.708333	0.729167	0.979167	0.375	0.335664	0.180556	0.340278	0.520833	0.659722	0.979167	0.354167
0.293566	0.412869	0.293566	0.237584	0.17047	0.245638	0.012064	0.219839	0.461126	0.706434	0.993298	0.002681	0.245308	0.5	0.773458	0.99866	0.00134	0.272118	0.522788	0.75067	1	0.580429	0.143432	0.276139	0.061745	0.051007	0	0.00134	0.189008	0.411528	0.702413	1	0.005362	0.422252	0.630027	0.74933	0.99866	0.030831	0.266756	0.512064	0.806971	0.990617	0.462466	0.327517	0.005362	0.344504	0.591153	0.774799	0.997319	0.41555
0.385714	0.404762	0.209524	0.282297	0.162679	0.177033	0.014286	0.204762	0.461905	0.719048	1	0.009524	0.242857	0.542857	0.790476	0.995238	0.004762	0.280952	0.490476	0.671429	0.97619	0.404762	0.119048	0.47619	0.057416	0.076555	0.009569	0.004762	0.1	0.261905	0.652381	1	0.133333	0.195238	0.628571	0.671429	0.938095	0.128571	0.4	0.552381	0.785714	0.990476	0.442857	0.430622	0.133333	0.342857	0.52381	0.742857	0.980952	0.419048
0.431193	0.238532	0.330275	0.222222	0.296296	0.148148	0.027523	0.229358	0.486239	0.688073	0.981651	0.018349	0.238532	0.412844	0.724771	0.990826	0.009174	0.211009	0.495413	0.788991	1	0.449541	0.311927	0.238532	0.12963	0.055556	0	0.009174	0.238532	0.59633	0.834862	1	0.256881	0.495413	0.614679	0.779817	0.963303	0.055046	0.155963	0.220183	0.394495	0.458716	0.440367	0.388889	0.055046	0.211009	0.495413	0.816514	0.963303	0.256881
0.412346	0.353086	0.234568	0.277228	0.173267	0.163366	0.012346	0.283951	0.451852	0.725926	0.997531	0.004938	0.209877	0.503704	0.676543	0.992593	0.002469	0.22963	0.612346	0.849383	1	0.632099	0.120988	0.246914	0.049505	0.064356	0	0.002469	0.197531	0.454321	0.634568	1	0.130864	0.651852	0.765432	0.881481	0.965432	0.069136	0.293827	0.592593	0.819753	0.995062	0.360494	0.321782	0.007407	0.219753	0.562963	0.77284	0.990123	0.404938
0.37561	0.35122	0.273171	0.269608	0.254902	0.181373	0.014634	0.195122	0.419512	0.692683	1	0.009756	0.239024	0.502439	0.765854	0.995122	0.004878	0.356098	0.560976	0.77561	0.985366	0.502439	0.165854	0.331707	0.068627	0.088235	0.009804	0.004878	0.156098	0.521951	0.77561	1	0.219512	0.282927	0.619512	0.946341	0.990244	0.039024	0.341463	0.439024	0.721951	0.926829	0.458537	0.470588	0.019512	0.360976	0.517073	0.746341	0.985366	0.317073
0.450867	0.236994	0.312139	0.209302	0.290698	0.174419	0.011561	0.277457	0.485549	0.83237	0.99422	0.075145	0.225434	0.531792	0.728324	0.988439	0.00578	0.202312	0.456647	0.65896	1	0.364162	0.283237	0.352601	0.122093	0.063953	0.005814	0.00578	0.138728	0.508671	0.722543	1	0.011561	0.213873	0.531792	0.751445	0.843931	0.052023	0.289017	0.375723	0.589595	0.976879	0.352601	0.44186	0.017341	0.179191	0.456647	0.65896	0.930636	0.265896
0.425508	0.314898	0.259594	0.263277	0.219209	0.170621	0.003386	0.251693	0.475169	0.725734	1	0.002257	0.256208	0.484199	0.730248	0.993228	0.001129	0.23702	0.571106	0.786682	0.998871	0.565463	0.164786	0.269752	0.077966	0.066667	0.014689	0.001129	0.209932	0.392777	0.642212	1	0.009029	0.247178	0.651242	0.839729	0.962754	0.022573	0.469526	0.626411	0.77991	0.997743	0.457111	0.433898	0.009029	0.27088	0.566591	0.758465	0.992099	0.323928
0.374813	0.388306	0.236882	0.288288	0.160661	0.171171	0.002999	0.209895	0.469265	0.73913	1	0.011994	0.266867	0.518741	0.770615	0.995502	0.001499	0.311844	0.547226	0.731634	0.997001	0.544228	0.127436	0.328336	0.046547	0.073574	0.007508	0.001499	0.151424	0.389805	0.767616	1	0.227886	0.457271	0.572714	0.709145	0.826087	0.004498	0.362819	0.56072	0.737631	0.98051	0.481259	0.327327	0.004498	0.310345	0.491754	0.667166	0.986507	0.433283
0.363484	0.353434	0.283082	0.278523	0.209732	0.191275	0.0067	0.281407	0.561139	0.777219	1	0.00335	0.18258	0.450586	0.720268	0.99665	0.001675	0.283082	0.470687	0.703518	0.9866	0.467337	0.142379	0.390285	0.055369	0.075503	0.005034	0.001675	0.20268	0.561139	0.772194	1	0.0067	0.288107	0.440536	0.631491	0.931323	0.033501	0.266332	0.497487	0.785595	0.917923	0.472362	0.33557	0.011725	0.229481	0.440536	0.676717	0.9866	0.370184
0.339623	0.372642	0.287736	0.251185	0.241706	0.189573	0.009434	0.212264	0.448113	0.764151	0.990566	0.04717	0.330189	0.504717	0.712264	1	0.004717	0.174528	0.518868	0.75	0.971698	0.537736	0.141509	0.320755	0.075829	0.066351	0	0.004717	0.264151	0.400943	0.688679	1	0.014151	0.066038	0.589623	0.731132	0.915094	0.09434	0.20283	0.556604	0.787736	0.976415	0.509434	0.369668	0.014151	0.34434	0.528302	0.768868	0.971698	0.40566
0.568465	0.248963	0.182573	0.291667	0.1875	0.075	0.012448	0.377593	0.589212	0.788382	1	0.008299	0.190871	0.452282	0.755187	0.995851	0.004149	0.107884	0.273859	0.390041	0.929461	0.572614	0.124481	0.302905	0.05	0.1	0.008333	0.004149	0.410788	0.659751	0.813278	1	0.016598	0.041494	0.186722	0.236515	0.817427	0.053942	0.26556	0.348548	0.485477	0.962656	0.219917	0.208333	0.016598	0.112033	0.244813	0.3361	0.825726	0.240664
0.263369	0.495989	0.240642	0.261044	0.116466	0.239625	0.005348	0.160428	0.391711	0.691176	0.997326	0.002674	0.316845	0.576203	0.798128	0.990642	0.001337	0.216578	0.434492	0.681818	1	0.683155	0.112299	0.204545	0.053548	0.066934	0	0.001337	0.346257	0.614973	0.796791	1	0.006684	0.132353	0.229947	0.335561	0.969251	0.032086	0.201872	0.377005	0.506684	0.995989	0.475936	0.364123	0.006684	0.300802	0.510695	0.762032	0.991979	0.486631
0.354331	0.314961	0.330709	0.246032	0.285714	0.18254	0.015748	0.204724	0.464567	0.724409	1	0.086614	0.275591	0.480315	0.795276	0.984252	0.007874	0.23622	0.511811	0.700787	0.952756	0.472441	0.488189	0.03937	0.15873	0.015873	0	0.007874	0.307087	0.543307	0.795276	1	0.102362	0.251969	0.488189	0.700787	0.937008	0.023622	0.023622	0.031496	0.03937	0.055118	0.370079	0.47619	0.031496	0.181102	0.456693	0.700787	0.952756	0.354331
0.405694	0.362989	0.231317	0.3	0.142857	0.192857	0.02847	0.217082	0.455516	0.686833	0.989324	0.010676	0.24911	0.494662	0.754448	0.978648	0.003559	0.256228	0.604982	0.800712	1	0.587189	0.124555	0.288256	0.057143	0.078571	0	0.003559	0.30605	0.47331	0.711744	1	0.007117	0.601423	0.697509	0.814947	0.978648	0.042705	0.11032	0.252669	0.654804	0.918149	0.320285	0.328571	0.007117	0.256228	0.654804	0.818505	0.992883	0.359431
0.337025	0.356013	0.306962	0.240887	0.220285	0.202853	0.003165	0.251582	0.492089	0.724684	1	0.006329	0.21519	0.474684	0.78481	0.996835	0.001582	0.308544	0.518987	0.721519	0.985759	0.47943	0.045886	0.474684	0.019017	0.104596	0.009509	0.001582	0.126582	0.259494	0.612342	1	0.306962	0.503165	0.667722	0.963608	0.987342	0.006329	0.438291	0.620253	0.792722	0.949367	0.571203	0.393027	0.009494	0.264241	0.496835	0.716772	0.988924	0.387658
0.375	0.291667	0.333333	0.197605	0.299401	0.209581	0.017857	0.25	0.52381	0.77381	1	0.029762	0.196429	0.428571	0.702381	0.958333	0.005952	0.279762	0.535714	0.755952	0.988095	0.404762	0.261905	0.333333	0.095808	0.05988	0.011976	0.005952	0.136905	0.404762	0.660714	1	0.089286	0.47619	0.720238	0.815476	0.892857	0.154762	0.25	0.505952	0.589286	0.982143	0.410714	0.431138	0.029762	0.279762	0.517857	0.702381	0.982143	0.27381
0.433566	0.272727	0.293706	0.221053	0.22807	0.192982	0.020979	0.318182	0.552448	0.786713	0.98951	0.006993	0.206294	0.409091	0.667832	0.996503	0.003497	0.234266	0.458042	0.723776	1	0.325175	0.048951	0.625874	0.021053	0.105263	0.007018	0.003497	0.20979	0.318182	0.583916	1	0.01049	0.045455	0.27972	0.912587	0.926573	0.020979	0.36014	0.56993	0.783217	0.98951	0.409091	0.42807	0.01049	0.255245	0.51049	0.755245	0.972028	0.304196
0.320843	0.367681	0.311475	0.215962	0.201878	0.241784	0.014052	0.257611	0.487119	0.765808	0.990632	0.004684	0.266979	0.517564	0.761124	1	0.002342	0.224824	0.473068	0.69555	0.997658	0.442623	0.081967	0.47541	0.032864	0.089202	0.004695	0.002342	0.234192	0.447307	0.763466	1	0.01171	0.032787	0.222482	0.501171	0.819672	0.070258	0.358314	0.548009	0.737705	0.995316	0.559719	0.342723	0.01171	0.323185	0.533958	0.721311	0.997658	0.388759
0.295302	0.422819	0.281879	0.277027	0.168919	0.256757	0.073826	0.422819	0.590604	0.738255	0.986577	0.020134	0.161074	0.409396	0.758389	1	0.006711	0.234899	0.442953	0.697987	0.959732	0.61745	0.288591	0.09396	0.060811	0.02027	0.006757	0.006711	0.214765	0.510067	0.771812	1	0.33557	0.395973	0.503356	0.691275	0.818792	0.040268	0.053691	0.080537	0.825503	0.852349	0.33557	0.472973	0.040268	0.268456	0.456376	0.684564	0.926174	0.422819
0.347692	0.384615	0.267692	0.228395	0.182099	0.209877	0.015385	0.166154	0.486154	0.729231	1	0.006154	0.301538	0.523077	0.775385	0.990769	0.003077	0.227692	0.443077	0.698462	0.993846	0.510769	0.156923	0.332308	0.070988	0.070988	0.009259	0.003077	0.267692	0.513846	0.793846	1	0.009231	0.156923	0.224615	0.44	0.972308	0.092308	0.323077	0.646154	0.747692	0.966154	0.486154	0.345679	0.009231	0.236923	0.458462	0.673846	0.981538	0.378462
0.358974	0.333333	0.307692	0.267241	0.189655	0.198276	0.042735	0.188034	0.57265	0.794872	1	0.025641	0.299145	0.521368	0.752137	0.982906	0.008547	0.17094	0.393162	0.692308	0.965812	0.444444	0.230769	0.324786	0.103448	0.068966	0	0.008547	0.213675	0.521368	0.649573	1	0.17094	0.25641	0.350427	0.42735	0.564103	0.051282	0.119658	0.735043	0.846154	0.965812	0.410256	0.448276	0.034188	0.25641	0.478632	0.74359	0.965812	0.358974
0.358108	0.378378	0.263514	0.333333	0.210884	0.136054	0.054054	0.331081	0.540541	0.702703	0.993243	0.02027	0.22973	0.614865	0.831081	1	0.006757	0.128378	0.304054	0.513514	0.871622	0.506757	0.371622	0.121622	0.108844	0.027211	0	0.006757	0.425676	0.675676	0.810811	1	0.094595	0.189189	0.304054	0.452703	0.871622	0.027027	0.047297	0.5	0.527027	0.560811	0.47973	0.367347	0.02027	0.243243	0.452703	0.817568	0.986486	0.412162
0.386935	0.407035	0.20603	0.343434	0.156566	0.141414	0.020101	0.241206	0.572864	0.834171	1	0.01005	0.231156	0.497487	0.748744	0.979899	0.005025	0.251256	0.38191	0.60804	0.969849	0.633166	0.135678	0.231156	0.050505	0.060606	0	0.005025	0.190955	0.472362	0.763819	1	0.281407	0.41206	0.447236	0.603015	0.668342	0.025126	0.356784	0.552764	0.924623	0.984925	0.291457	0.323232	0.025126	0.331658	0.497487	0.648241	0.984925	0.437186
0.308707	0.426121	0.265172	0.241744	0.147952	0.244386	0.01847	0.257256	0.505277	0.774406	1	0.002639	0.234828	0.536939	0.773087	0.997361	0.001319	0.244063	0.437995	0.668865	0.996042	0.530343	0.139842	0.329815	0.059445	0.064729	0.001321	0.001319	0.224274	0.565963	0.864116	1	0.005277	0.275726	0.42876	0.576517	0.980211	0.025066	0.262533	0.478892	0.651715	0.832454	0.493404	0.346103	0.005277	0.275726	0.485488	0.700528	0.996042	0.465699
0.371901	0.366391	0.261708	0.270718	0.179558	0.176796	0.008264	0.256198	0.451791	0.716253	1	0.00551	0.22314	0.495868	0.77686	0.997245	0.002755	0.247934	0.526171	0.752066	0.99449	0.37741	0.057851	0.564738	0.022099	0.093923	0	0.002755	0.269972	0.407713	0.633609	1	0.630854	0.85124	0.881543	0.895317	0.917355	0.060606	0.212121	0.528926	0.716253	0.99449	0.504132	0.331492	0.011019	0.206612	0.495868	0.705234	0.986226	0.349862
0.384615	0.318681	0.296703	0.222222	0.222222	0.211111	0.021978	0.230769	0.461538	0.758242	0.967033	0.043956	0.197802	0.384615	0.637363	1	0.010989	0.241758	0.527473	0.835165	0.978022	0.32967	0.351648	0.318681	0.1	0.055556	0.011111	0.010989	0.32967	0.527473	0.692308	1	0.032967	0.10989	0.494505	0.659341	0.967033	0.153846	0.21978	0.296703	0.769231	0.901099	0.461538	0.444444	0.043956	0.197802	0.527473	0.747253	0.978022	0.263736
0.358696	0.434783	0.206522	0.384615	0.142857	0.197802	0.032609	0.163043	0.358696	0.652174	0.956522	0.021739	0.25	0.521739	0.73913	1	0.01087	0.336957	0.554348	0.782609	0.934783	0.163043	0	0.836957	0	0.065934	0	0.01087	0.032609	0.467391	0.728261	1	0	0	0	0	0	0.054348	0.25	0.48913	0.771739	0.98913	0.282609	0.417582	0.076087	0.304348	0.543478	0.673913	0.945652	0.423913
0.333805	0.500707	0.165488	0.229462	0.135977	0.127479	0.004243	0.404526	0.643564	0.78925	0.998586	0.002829	0.190948	0.335219	0.635078	0.997171	0.001414	0.442716	0.571429	0.762376	1	0.677511	0.080622	0.241867	0.033994	0.028329	0	0.001414	0.171146	0.340877	0.644979	1	0.155587	0.463932	0.526167	0.585573	0.909477	0.359264	0.608204	0.725601	0.786421	0.862801	0.428571	0.271955	0.007072	0.356436	0.579915	0.865629	0.98727	0.489392
0.408333	0.233333	0.358333	0.168067	0.285714	0.084034	0.016667	0.291667	0.541667	0.775	0.958333	0.025	0.208333	0.4	0.725	0.975	0.008333	0.233333	0.516667	0.708333	1	0.375	0.266667	0.358333	0.10084	0.084034	0.016807	0.008333	0.333333	0.466667	0.808333	1	0.033333	0.291667	0.416667	0.533333	0.991667	0.125	0.2	0.583333	0.7	0.9	0.45	0.403361	0.033333	0.208333	0.483333	0.7	0.991667	0.233333
0.333333	0.373984	0.292683	0.270492	0.172131	0.262295	0.02439	0.219512	0.422764	0.682927	0.99187	0.03252	0.243902	0.552846	0.780488	1	0.00813	0.317073	0.528455	0.764228	0.98374	0.235772	0	0.764228	0	0.081967	0	0.00813	0.056911	0.227642	0.715447	1	0	0	0	0	0	0.065041	0.300813	0.495935	0.764228	0.97561	0.430894	0.459016	0.03252	0.325203	0.528455	0.739837	0.95122	0.349593
0.423913	0.336957	0.23913	0.351648	0.186813	0.175824	0.032609	0.195652	0.434783	0.728261	1	0.021739	0.173913	0.413043	0.695652	0.934783	0.01087	0.358696	0.521739	0.804348	0.978261	0.597826	0.032609	0.369565	0.043956	0.043956	0	0.01087	0.141304	0.293478	0.554348	1	0.380435	0.380435	0.380435	0.391304	0.586957	0.445652	0.521739	0.782609	0.869565	0.967391	0.358696	0.395604	0.130435	0.434783	0.597826	0.804348	0.934783	0.347826
0.332046	0.476834	0.19112	0.257253	0.145068	0.170213	0.011583	0.222008	0.434363	0.658301	0.986486	0.003861	0.279923	0.602317	0.851351	1	0.001931	0.189189	0.444015	0.619691	0.978764	0.716216	0.073359	0.210425	0.038685	0.034816	0	0.001931	0.305019	0.635135	0.820463	1	0.007722	0.316602	0.353282	0.472973	0.623552	0.046332	0.148649	0.266409	0.494208	0.677606	0.328185	0.313346	0.007722	0.262548	0.438224	0.61583	0.957529	0.5
0.353312	0.312303	0.334385	0.205696	0.231013	0.205696	0.009464	0.246057	0.545741	0.788644	0.990536	0.006309	0.217666	0.476341	0.712934	0.996845	0.003155	0.26183	0.495268	0.722397	1	0.432177	0.173502	0.394322	0.06962	0.082278	0.012658	0.003155	0.208202	0.492114	0.776025	1	0.009464	0.11041	0.523659	0.687697	0.990536	0.07571	0.290221	0.422713	0.766562	0.987382	0.570978	0.35443	0.012618	0.264984	0.501577	0.690852	0.993691	0.29653
0.366038	0.320755	0.313208	0.265152	0.208333	0.204545	0.007547	0.264151	0.539623	0.754717	1	0.011321	0.203774	0.430189	0.701887	0.984906	0.003774	0.260377	0.471698	0.732075	0.981132	0.388679	0.090566	0.520755	0.034091	0.102273	0.003788	0.003774	0.09434	0.34717	0.74717	1	0.211321	0.777358	0.826415	0.849057	0.879245	0.109434	0.309434	0.49434	0.645283	0.988679	0.498113	0.363636	0.022642	0.279245	0.471698	0.698113	0.981132	0.335849
0.349372	0.332636	0.317992	0.234801	0.232704	0.192872	0.004184	0.177824	0.472803	0.723849	1	0.01046	0.330544	0.600418	0.834728	0.997908	0.002092	0.232218	0.439331	0.646444	0.972803	0.539749	0.123431	0.33682	0.052411	0.056604	0.002096	0.002092	0.320084	0.608787	0.834728	1	0.016736	0.23431	0.328452	0.650628	0.972803	0.006276	0.154812	0.399582	0.575314	0.799163	0.543933	0.343816	0.006276	0.286611	0.479079	0.73431	0.979079	0.368201
0.415842	0.29703	0.287129	0.23	0.27	0.17	0.029703	0.227723	0.485149	0.653465	0.970297	0.019802	0.346535	0.574257	0.772277	0.990099	0.009901	0.19802	0.415842	0.732673	1	0.366337	0.029703	0.60396	0.02	0.1	0	0.009901	0.514851	0.623762	0.772277	1	0.950495	0.950495	0.950495	0.960396	0.970297	0.029703	0.168317	0.316832	0.594059	0.881188	0.386139	0.46	0.049505	0.29703	0.623762	0.792079	0.950495	0.29703
0.35461	0.248227	0.397163	0.192857	0.271429	0.178571	0.021277	0.205674	0.48227	0.723404	1	0.035461	0.35461	0.510638	0.702128	0.985816	0.007092	0.163121	0.475177	0.758865	0.978723	0.319149	0.148936	0.531915	0.05	0.092857	0.007143	0.007092	0.319149	0.446809	0.751773	1	0.120567	0.390071	0.48227	0.51773	0.787234	0.021277	0.184397	0.567376	0.702128	0.971631	0.489362	0.414286	0.021277	0.191489	0.510638	0.716312	0.971631	0.205674
0.4	0.372222	0.227778	0.27933	0.206704	0.167598	0.011111	0.211111	0.455556	0.705556	1	0.05	0.261111	0.444444	0.755556	0.988889	0.005556	0.377778	0.577778	0.738889	0.961111	0.561111	0.166667	0.272222	0.061453	0.061453	0.01676	0.005556	0.216667	0.361111	0.522222	1	0.094444	0.533333	0.744444	0.8	0.933333	0.016667	0.444444	0.65	0.866667	0.988889	0.361111	0.379888	0.033333	0.338889	0.466667	0.727778	0.933333	0.377778
0.383562	0.324201	0.292237	0.237986	0.221968	0.19222	0.004566	0.267123	0.557078	0.853881	1	0.009132	0.230594	0.484018	0.703196	0.990868	0.002283	0.237443	0.43379	0.675799	0.97032	0.385845	0.164384	0.449772	0.059497	0.08238	0.004577	0.002283	0.237443	0.468037	0.73516	1	0.100457	0.299087	0.504566	0.682648	0.796804	0.013699	0.216895	0.531963	0.819635	0.974886	0.525114	0.347826	0.013699	0.210046	0.422374	0.680365	0.97032	0.324201
0.344749	0.424658	0.230594	0.279176	0.173913	0.196796	0.004566	0.30137	0.570776	0.787671	0.997717	0.006849	0.194064	0.388128	0.728311	0.993151	0.002283	0.351598	0.538813	0.703196	1	0.671233	0.041096	0.287671	0.02746	0.050343	0	0.002283	0.187215	0.356164	0.753425	1	0.041096	0.047945	0.860731	0.869863	0.965753	0.009132	0.525114	0.614155	0.728311	0.90411	0.390411	0.356979	0.013699	0.26484	0.497717	0.684932	0.984018	0.383562
0.385396	0.273834	0.340771	0.207317	0.26626	0.191057	0.008114	0.247465	0.488844	0.758621	1	0.004057	0.245436	0.541582	0.74645	0.991886	0.002028	0.237323	0.470588	0.724138	0.98783	0.25355	0.083164	0.663286	0.026423	0.067073	0.006098	0.002028	0.383367	0.647059	0.805274	1	0.320487	0.375254	0.444219	0.965517	0.98783	0.008114	0.180527	0.466531	0.669371	0.945233	0.51927	0.426829	0.010142	0.31643	0.541582	0.760649	0.98783	0.281947
0.38843	0.278237	0.333333	0.205517	0.314483	0.197241	0.008264	0.275482	0.548209	0.760331	1	0.004132	0.206612	0.431129	0.703857	0.99449	0.001377	0.249311	0.506887	0.758953	0.995868	0.465565	0.232782	0.301653	0.096552	0.057931	0.002759	0.001377	0.212121	0.440771	0.712121	1	0.0427	0.18595	0.42562	0.819559	0.975207	0.006887	0.348485	0.57438	0.736915	0.995868	0.578512	0.383448	0.004132	0.253444	0.49449	0.753444	0.995868	0.294766
0.323944	0.341549	0.334507	0.183746	0.222615	0.268551	0.010563	0.34507	0.542254	0.795775	1	0.007042	0.190141	0.380282	0.679577	0.989437	0.003521	0.214789	0.528169	0.753521	0.996479	0.475352	0.179577	0.34507	0.056537	0.070671	0.007067	0.003521	0.302817	0.59507	0.84507	1	0.010563	0.070423	0.228873	0.56338	0.883803	0.098592	0.278169	0.454225	0.725352	0.975352	0.507042	0.438163	0.014085	0.207746	0.433099	0.683099	0.985915	0.352113
0.333503	0.322318	0.344179	0.20295	0.232452	0.231943	0.002034	0.23335	0.474835	0.738688	0.998475	0.001017	0.252161	0.516014	0.748856	1	0.000508	0.262837	0.513981	0.75089	0.999492	0.404677	0.149975	0.445348	0.055443	0.085961	0.003561	0.000508	0.222166	0.512456	0.759532	1	0.002542	0.316726	0.551093	0.770208	0.999492	0.005592	0.259786	0.459583	0.723945	0.930859	0.563803	0.375381	0.002542	0.279105	0.509405	0.744281	0.999492	0.341129
0.375172	0.308966	0.315862	0.208564	0.243094	0.214088	0.004138	0.224828	0.526897	0.783448	1	0.002759	0.296552	0.503448	0.73931	0.995862	0.001379	0.216552	0.467586	0.704828	0.997241	0.475862	0.350345	0.173793	0.13674	0.029006	0.001381	0.001379	0.21931	0.422069	0.692414	1	0.004138	0.325517	0.517241	0.675862	0.995862	0.033103	0.147586	0.882759	0.928276	0.987586	0.49931	0.375691	0.008276	0.277241	0.503448	0.724138	0.997241	0.33931
0.321918	0.424658	0.253425	0.282759	0.165517	0.255172	0.020548	0.191781	0.506849	0.753425	1	0.013699	0.267123	0.493151	0.746575	0.965753	0.006849	0.253425	0.417808	0.657534	0.945205	0.527397	0.287671	0.184932	0.096552	0.027586	0	0.006849	0.130137	0.452055	0.746575	1	0.150685	0.253425	0.349315	0.684932	0.883562	0.527397	0.561644	0.609589	0.767123	0.815068	0.445205	0.344828	0.034247	0.328767	0.520548	0.719178	0.945205	0.431507
0.313953	0.313123	0.372924	0.203658	0.226933	0.237739	0.003322	0.215116	0.497508	0.769103	0.999169	0.001661	0.288206	0.503322	0.753322	1	0.000831	0.240033	0.486711	0.740864	0.998339	0.297342	0.017442	0.685216	0.009144	0.103907	0.002494	0.000831	0.320598	0.581395	0.789867	1	0.408638	0.608804	0.83804	0.973422	0.997508	0.002492	0.213455	0.464286	0.726744	0.9701	0.604651	0.36409	0.002492	0.262458	0.475914	0.723422	0.998339	0.354651
0.33	0.4	0.27	0.242424	0.141414	0.212121	0.06	0.27	0.48	0.67	0.94	0.02	0.22	0.59	0.82	1	0.01	0.15	0.33	0.54	0.96	0.47	0.26	0.27	0.10101	0.080808	0	0.01	0.16	0.63	0.79	1	0.28	0.33	0.59	0.72	0.86	0.07	0.18	0.25	0.45	0.95	0.37	0.40404	0.07	0.17	0.45	0.6	0.96	0.43
0.359712	0.359712	0.280576	0.217391	0.173913	0.224638	0.021583	0.338129	0.546763	0.741007	0.971223	0.014388	0.194245	0.410072	0.784173	1	0.007194	0.23741	0.467626	0.697842	0.992806	0.47482	0.129496	0.395683	0.057971	0.072464	0	0.007194	0.208633	0.553957	0.863309	1	0.230216	0.251799	0.345324	0.618705	0.913669	0.057554	0.165468	0.496403	0.748201	0.848921	0.417266	0.362319	0.028777	0.258993	0.467626	0.640288	0.964029	0.338129
0.339726	0.386301	0.273973	0.228022	0.211538	0.236264	0.005479	0.20274	0.520548	0.769863	0.994521	0.013699	0.254795	0.457534	0.70137	1	0.00274	0.265753	0.528767	0.747945	0.969863	0.69589	0.057534	0.246575	0.098901	0.098901	0.005495	0.00274	0.230137	0.468493	0.720548	1	0.019178	0.257534	0.40274	0.526027	0.857534	0.084932	0.339726	0.646575	0.8	0.994521	0.30137	0.505495	0.013699	0.271233	0.512329	0.734247	0.989041	0.383562
0.318623	0.43248	0.248897	0.242049	0.174912	0.218198	0.00353	0.247132	0.507502	0.76346	0.992056	0.001765	0.313327	0.541041	0.759047	1	0.000883	0.181818	0.399823	0.699029	0.994704	0.640777	0.059135	0.300088	0.036219	0.060954	0.00265	0.000883	0.40865	0.578994	0.768756	1	0.007944	0.227714	0.739629	0.793469	0.954987	0.031774	0.157988	0.269197	0.390997	0.969991	0.424537	0.392226	0.002648	0.217123	0.445719	0.721977	0.978817	0.43248
0.437016	0.322674	0.24031	0.262852	0.200776	0.152279	0.002907	0.16376	0.40407	0.741279	0.998062	0.001938	0.286822	0.534884	0.761628	0.997093	0.000969	0.372093	0.545543	0.732558	1	0.496124	0.125969	0.377907	0.050436	0.075655	0.00582	0.000969	0.176357	0.356589	0.69186	1	0.008721	0.460271	0.57655	0.695736	0.999031	0.061047	0.371124	0.58624	0.793605	0.987403	0.392442	0.325897	0.007752	0.407946	0.552326	0.718023	0.997093	0.360465
0.340102	0.345178	0.314721	0.229008	0.229008	0.223919	0.007614	0.271574	0.497462	0.763959	0.997462	0.005076	0.228426	0.472081	0.746193	0.989848	0.002538	0.243655	0.520305	0.738579	1	0.467005	0.213198	0.319797	0.083969	0.089059	0.017812	0.002538	0.238579	0.459391	0.751269	1	0.017766	0.335025	0.558376	0.738579	0.92132	0.048223	0.203046	0.525381	0.771574	0.984772	0.527919	0.437659	0.017766	0.261421	0.530457	0.741117	0.994924	0.383249
0.332103	0.306273	0.361624	0.185185	0.244444	0.240741	0.01845	0.258303	0.479705	0.774908	0.99631	0.01476	0.228782	0.546125	0.719557	1	0.00369	0.217712	0.461255	0.715867	0.99262	0.350554	0.177122	0.472325	0.051852	0.088889	0	0.00369	0.151292	0.383764	0.634686	1	0.121771	0.295203	0.369004	0.568266	0.660517	0.01845	0.258303	0.704797	0.826568	0.99262	0.542435	0.407407	0.01476	0.217712	0.461255	0.649446	0.98893	0.335793
0.333333	0.387387	0.279279	0.318182	0.154545	0.2	0.018018	0.189189	0.468468	0.711712	0.954955	0.036036	0.243243	0.459459	0.747748	1	0.009009	0.207207	0.495495	0.702703	0.990991	0.468468	0.315315	0.216216	0.109091	0.036364	0.018182	0.009009	0.27027	0.432432	0.81982	1	0.063063	0.387387	0.666667	0.783784	0.936937	0.054054	0.171171	0.468468	0.522523	0.576577	0.342342	0.363636	0.036036	0.135135	0.45045	0.666667	0.936937	0.396396
0.385787	0.360406	0.253807	0.265306	0.209184	0.153061	0.015228	0.238579	0.558376	0.832487	1	0.010152	0.248731	0.467005	0.71066	0.979695	0.005076	0.182741	0.390863	0.675127	0.949239	0.385787	0.208122	0.406091	0.061224	0.061224	0	0.005076	0.147208	0.436548	0.715736	1	0.030457	0.076142	0.324873	0.685279	0.959391	0.167513	0.390863	0.609137	0.791878	0.893401	0.416244	0.459184	0.035533	0.22335	0.411168	0.654822	0.949239	0.390863
0.592357	0.269639	0.138004	0.261702	0.123404	0.095745	0.006369	0.350318	0.58811	0.781316	1	0.004246	0.195329	0.358811	0.677282	0.995754	0.002123	0.142251	0.284501	0.666667	0.997877	0.783439	0.063694	0.152866	0.025532	0.038298	0	0.002123	0.390658	0.592357	0.796178	1	0.220807	0.278132	0.316348	0.36518	0.974522	0.014862	0.133758	0.171975	0.333333	0.855626	0.195329	0.187234	0.010616	0.127389	0.286624	0.403397	0.993631	0.346072
0.52809	0.191011	0.280899	0.159091	0.284091	0.159091	0.033708	0.247191	0.516854	0.764045	1	0.022472	0.168539	0.337079	0.573034	0.876404	0.011236	0.325843	0.494382	0.752809	0.977528	0.247191	0	0.752809	0	0.090909	0	0.011236	0.191011	0.258427	0.550562	1	0	0	0	0	0	0.05618	0.314607	0.505618	0.752809	0.955056	0.393258	0.431818	0.089888	0.314607	0.483146	0.707865	0.977528	0.157303
0.362708	0.309068	0.328225	0.221228	0.257033	0.195652	0.007663	0.293742	0.53129	0.749681	0.994891	0.002554	0.219668	0.473819	0.729246	0.997446	0.001277	0.217114	0.44189	0.772669	1	0.47765	0.246488	0.275862	0.086957	0.066496	0.002558	0.001277	0.236271	0.537676	0.753512	1	0.005109	0.251596	0.505747	0.772669	0.971903	0.066411	0.283525	0.402299	0.727969	0.996169	0.538953	0.375959	0.006386	0.215837	0.427842	0.722861	0.996169	0.357599
0.342488	0.386107	0.271405	0.257282	0.156958	0.229773	0.008078	0.169628	0.523425	0.780291	0.998384	0.003231	0.232633	0.450727	0.712439	1	0.001616	0.340872	0.536349	0.772213	0.983845	0.457189	0.138934	0.403877	0.045307	0.07767	0.006472	0.001616	0.122779	0.277868	0.642973	1	0.226171	0.439418	0.58643	0.754443	0.875606	0.017771	0.384491	0.621971	0.783522	0.993538	0.46042	0.326861	0.011309	0.337641	0.512116	0.739903	0.990307	0.42811
0.379348	0.354348	0.266304	0.243743	0.21654	0.189336	0.002174	0.252174	0.508696	0.738043	1	0.005435	0.253261	0.505435	0.75	0.997826	0.001087	0.226087	0.468478	0.76087	0.998913	0.592391	0.169565	0.238043	0.071817	0.054407	0.002176	0.001087	0.259783	0.55	0.765217	1	0.021739	0.191304	0.565217	0.881522	0.973913	0.031522	0.219565	0.421739	0.640217	0.993478	0.431522	0.369967	0.003261	0.291304	0.544565	0.805435	0.998913	0.369565
0.301552	0.394678	0.303769	0.242222	0.177778	0.233333	0.004435	0.226164	0.518847	0.807095	1	0.006652	0.261641	0.505543	0.740576	0.993348	0.002217	0.24612	0.474501	0.696231	0.980044	0.463415	0.121951	0.414634	0.044444	0.084444	0.004444	0.002217	0.223947	0.487805	0.804878	1	0.011086	0.093126	0.40133	0.844789	0.946785	0.108647	0.332594	0.527716	0.698448	0.984479	0.569845	0.346667	0.013304	0.312639	0.523282	0.711752	0.988914	0.392461
0.472727	0.218182	0.309091	0.211009	0.366972	0.119266	0.018182	0.281818	0.545455	0.790909	1	0.027273	0.109091	0.372727	0.581818	0.990909	0.009091	0.263636	0.527273	0.763636	0.954545	0.381818	0.290909	0.327273	0.110092	0.055046	0.018349	0.009091	0.190909	0.536364	0.809091	1	0.036364	0.118182	0.418182	0.609091	0.9	0.2	0.272727	0.527273	0.763636	0.872727	0.463636	0.422018	0.036364	0.181818	0.490909	0.709091	0.909091	0.190909
0.315789	0.421053	0.263158	0.265152	0.159091	0.272727	0.022556	0.210526	0.466165	0.691729	0.977444	0.015038	0.263158	0.548872	0.736842	1	0.007519	0.165414	0.488722	0.81203	0.969925	0.488722	0.285714	0.225564	0.075758	0.045455	0	0.007519	0.203008	0.421053	0.601504	1	0.030075	0.150376	0.473684	0.646617	0.721805	0.24812	0.774436	0.834586	0.902256	0.962406	0.406015	0.575758	0.030075	0.255639	0.541353	0.789474	0.969925	0.451128
0.23048	0.508937	0.260583	0.231638	0.140301	0.237288	0.009407	0.160865	0.416745	0.727187	1	0.001881	0.25682	0.486359	0.746943	0.999059	0.000941	0.345249	0.554092	0.775165	0.997178	0.658514	0.130762	0.210724	0.065913	0.043315	0.003766	0.000941	0.231421	0.441204	0.736595	1	0.143932	0.249294	0.468485	0.712135	0.947319	0.008467	0.278457	0.549389	0.837253	0.995296	0.607714	0.295669	0.006585	0.328316	0.530574	0.761054	0.997178	0.523048
0.3475	0.305	0.3475	0.20802	0.245614	0.213033	0.01	0.2775	0.505	0.7875	1	0.0075	0.19	0.43	0.705	0.9975	0.0025	0.2625	0.5225	0.7625	0.985	0.345	0.0925	0.5625	0.0401	0.120301	0.005013	0.0025	0.225	0.425	0.735	1	0.055	0.115	0.1975	0.29	0.36	0.01	0.4	0.5875	0.775	0.985	0.545	0.41604	0.015	0.27	0.4625	0.6975	0.98	0.31
0.335404	0.322981	0.341615	0.25625	0.21875	0.25	0.012422	0.26087	0.434783	0.745342	0.993789	0.049689	0.248447	0.52795	0.73913	1	0.006211	0.186335	0.484472	0.732919	0.956522	0.354037	0.304348	0.341615	0.13125	0.04375	0.00625	0.006211	0.136646	0.52795	0.732919	1	0.012422	0.229814	0.57764	0.826087	0.925466	0.15528	0.304348	0.391304	0.614907	0.981366	0.372671	0.4625	0.018634	0.192547	0.496894	0.689441	0.919255	0.31677
0.502326	0.269767	0.227907	0.242991	0.228972	0.130841	0.009302	0.311628	0.567442	0.846512	1	0.013953	0.223256	0.455814	0.64186	0.967442	0.004651	0.162791	0.4	0.632558	0.981395	0.44186	0.12093	0.437209	0.060748	0.088785	0.004673	0.004651	0.302326	0.618605	0.809302	1	0.013953	0.037209	0.218605	0.274419	0.790698	0.069767	0.316279	0.474419	0.72093	0.962791	0.353488	0.35514	0.013953	0.190698	0.348837	0.613953	0.981395	0.255814
0.283154	0.412186	0.304659	0.223022	0.183453	0.251799	0.089606	0.329749	0.551971	0.795699	1	0.007168	0.164875	0.405018	0.698925	0.992832	0.003584	0.318996	0.569892	0.756272	0.97491	0.483871	0.197133	0.318996	0.089928	0.082734	0.010791	0.003584	0.204301	0.523297	0.767025	1	0.007168	0.232975	0.508961	0.731183	0.939068	0.100358	0.293907	0.458781	0.655914	0.956989	0.451613	0.446043	0.010753	0.293907	0.530466	0.731183	0.971326	0.422939
0.289474	0.389474	0.321053	0.201058	0.201058	0.238095	0.010526	0.189474	0.384211	0.742105	0.994737	0.047368	0.326316	0.547368	0.757895	1	0.005263	0.242105	0.468421	0.673684	0.984211	0.463158	0.189474	0.347368	0.095238	0.084656	0	0.005263	0.336842	0.584211	0.852632	1	0.121053	0.184211	0.510526	0.715789	0.978947	0.021053	0.210526	0.357895	0.642105	0.831579	0.536842	0.359788	0.047368	0.226316	0.489474	0.657895	0.968421	0.442105
0.354037	0.515528	0.130435	0.45625	0.06875	0.15625	0.018634	0.329193	0.627329	0.782609	0.981366	0.012422	0.204969	0.453416	0.732919	0.993789	0.006211	0.136646	0.360248	0.490683	1	1	0	0	0	0	0	0.006211	0.248447	0.496894	0.745342	1	0	0	0	0	0	0	0	0	0	0	0.291925	0.475	0.031056	0.198758	0.453416	0.714286	0.956522	0.552795
0.417112	0.352941	0.229947	0.311828	0.182796	0.123656	0.032086	0.304813	0.550802	0.786096	0.994652	0.010695	0.251337	0.55615	0.759358	1	0.005348	0.176471	0.326203	0.545455	0.893048	0.347594	0.342246	0.31016	0.129032	0.021505	0	0.005348	0.240642	0.427807	0.572193	1	0.010695	0.117647	0.256684	0.406417	0.625668	0.657754	0.727273	0.823529	0.898396	0.97861	0.31016	0.430108	0.010695	0.203209	0.385027	0.604278	0.909091	0.358289
0.484375	0.242188	0.273438	0.19685	0.314961	0.11811	0.039062	0.257812	0.492188	0.773438	1	0.015625	0.15625	0.546875	0.898438	0.984375	0.007812	0.148438	0.382812	0.609375	0.796875	0.328125	0.289062	0.382812	0.070866	0.055118	0.007874	0.007812	0.304688	0.484375	0.796875	1	0.03125	0.09375	0.40625	0.515625	0.765625	0.164062	0.25	0.632812	0.828125	0.929688	0.390625	0.346457	0.054688	0.210938	0.4375	0.609375	0.773438	0.242188
0.274882	0.436019	0.2891	0.204762	0.157143	0.309524	0.066351	0.417062	0.606635	0.791469	0.990521	0.009479	0.189573	0.42654	0.725118	0.981043	0.004739	0.227488	0.412322	0.696682	1	0.492891	0.184834	0.322275	0.071429	0.061905	0.014286	0.004739	0.175355	0.317536	0.492891	1	0.085308	0.232227	0.454976	0.919431	0.995261	0.033175	0.559242	0.668246	0.758294	0.85782	0.511848	0.419048	0.014218	0.28436	0.445498	0.748815	0.995261	0.42654
0.29904	0.460905	0.240055	0.233516	0.144231	0.206044	0.004115	0.201646	0.530864	0.759945	1	0.002743	0.231824	0.41701	0.689986	0.994513	0.001372	0.29904	0.603567	0.805213	0.998628	0.714678	0.106996	0.178326	0.049451	0.052198	0.002747	0.001372	0.224966	0.441701	0.659808	1	0.009602	0.283951	0.709191	0.840878	0.997257	0.082305	0.364883	0.670782	0.875171	0.972565	0.499314	0.326923	0.005487	0.286694	0.518519	0.716049	0.995885	0.45679
0.307692	0.418269	0.274038	0.270531	0.130435	0.270531	0.028846	0.322115	0.543269	0.850962	1	0.009615	0.192308	0.418269	0.716346	0.990385	0.004808	0.240385	0.471154	0.682692	0.985577	0.514423	0.129808	0.355769	0.048309	0.10628	0	0.004808	0.173077	0.413462	0.860577	1	0.389423	0.427885	0.466346	0.668269	0.701923	0.019231	0.235577	0.596154	0.764423	0.956731	0.432692	0.347826	0.019231	0.399038	0.596154	0.735577	0.956731	0.403846
0.363014	0.363014	0.273973	0.310345	0.213793	0.17931	0.020548	0.253425	0.554795	0.753425	0.993151	0.013699	0.212329	0.410959	0.719178	1	0.006849	0.267123	0.486301	0.726027	0.90411	0.527397	0.130137	0.342466	0.041379	0.096552	0	0.006849	0.143836	0.369863	0.671233	1	0.260274	0.280822	0.452055	0.712329	0.746575	0.10274	0.513699	0.616438	0.815068	0.917808	0.39726	0.275862	0.068493	0.273973	0.554795	0.712329	0.924658	0.424658
0.326316	0.397895	0.275789	0.225738	0.166667	0.202532	0.016842	0.176842	0.376842	0.682105	0.981053	0.004211	0.269474	0.496842	0.728421	1	0.002105	0.357895	0.608421	0.821053	0.987368	0.530526	0.454737	0.014737	0.168776	0.004219	0	0.002105	0.16	0.44	0.726316	1	0.101053	0.355789	0.564211	0.776842	0.995789	0.006316	0.006316	0.010526	0.014737	0.018947	0.557895	0.371308	0.010526	0.324211	0.541053	0.741053	0.997895	0.425263
0.337449	0.358025	0.304527	0.285124	0.210744	0.202479	0.012346	0.201646	0.530864	0.773663	0.987654	0.00823	0.230453	0.481481	0.707819	0.995885	0.004115	0.288066	0.465021	0.736626	1	0.534979	0.209877	0.255144	0.057851	0.066116	0.016529	0.004115	0.152263	0.320988	0.621399	1	0.08642	0.36214	0.502058	0.740741	0.995885	0.242798	0.427984	0.658436	0.835391	0.950617	0.469136	0.31405	0.061728	0.308642	0.534979	0.728395	0.99177	0.374486
0.284289	0.411471	0.304239	0.2125	0.165	0.2725	0.007481	0.261845	0.506234	0.790524	1	0.009975	0.236908	0.488778	0.733167	0.997506	0.002494	0.25187	0.501247	0.730673	0.987531	0.361596	0.221945	0.416459	0.08	0.08	0	0.002494	0.264339	0.471322	0.783042	1	0.017456	0.194514	0.389027	0.526185	0.972569	0.054863	0.25187	0.586035	0.760599	0.992519	0.588529	0.425	0.017456	0.27182	0.488778	0.723192	0.985037	0.399002
0.338422	0.343511	0.318066	0.221939	0.232143	0.206633	0.010178	0.251908	0.491094	0.773537	0.997455	0.005089	0.24173	0.529262	0.75827	0.989822	0.002545	0.234097	0.463104	0.689567	1	0.348601	0.129771	0.521628	0.048469	0.084184	0.007653	0.002545	0.262087	0.552163	0.816794	1	0.017812	0.229008	0.287532	0.671756	0.928753	0.02799	0.312977	0.486005	0.717557	0.969466	0.56743	0.372449	0.007634	0.29771	0.562341	0.740458	0.97201	0.37659
0.306748	0.431493	0.261759	0.260246	0.157787	0.22541	0.01227	0.237219	0.478528	0.756646	0.993865	0.00409	0.282209	0.552147	0.799591	1	0.002045	0.208589	0.443763	0.654397	0.99591	0.456033	0.0818	0.462168	0.030738	0.071721	0.006148	0.002045	0.247444	0.631902	0.875256	1	0.06135	0.198364	0.415133	0.640082	0.9182	0.006135	0.265849	0.476483	0.613497	0.936605	0.531697	0.307377	0.00818	0.229039	0.474438	0.683027	0.99591	0.451943
0.341481	0.402222	0.256296	0.285397	0.180133	0.190511	0.001481	0.236296	0.484444	0.73037	0.997778	0.002963	0.258519	0.51037	0.757037	0.999259	0.000741	0.248148	0.503704	0.756296	1	0.5	0.134074	0.365926	0.13195	0.077094	0.001483	0.000741	0.234074	0.502222	0.760741	1	0.045185	0.288889	0.524444	0.752593	0.997778	0.001481	0.254815	0.485926	0.695556	0.977037	0.334074	0.530764	0.002963	0.242963	0.485926	0.747407	0.998519	0.39037
0.360775	0.271186	0.368039	0.196602	0.240291	0.201456	0.012107	0.249395	0.532688	0.774818	0.987893	0.004843	0.239709	0.472155	0.699758	0.990315	0.002421	0.251816	0.486683	0.753027	1	0.358354	0.138015	0.503632	0.082524	0.106796	0.004854	0.002421	0.208232	0.539952	0.813559	1	0.038741	0.16707	0.513317	0.917676	0.997579	0.007264	0.25908	0.464891	0.702179	0.951574	0.583535	0.373786	0.007264	0.242131	0.457627	0.677966	0.995157	0.268765
0.345196	0.405694	0.24911	0.282143	0.167857	0.207143	0.017794	0.263345	0.508897	0.864769	0.996441	0.010676	0.298932	0.572954	0.743772	1	0.003559	0.185053	0.409253	0.569395	0.967972	0.683274	0.120996	0.19573	0.064286	0.071429	0	0.003559	0.362989	0.565836	0.765125	1	0.039146	0.135231	0.19573	0.298932	0.822064	0.081851	0.227758	0.341637	0.857651	0.975089	0.430605	0.342857	0.035587	0.202847	0.476868	0.604982	0.967972	0.380783
0.303213	0.371486	0.325301	0.209256	0.225352	0.247485	0.006024	0.196787	0.518072	0.742972	0.997992	0.008032	0.289157	0.51004	0.738956	1	0.002008	0.238956	0.459839	0.757028	0.995984	0.403614	0.216867	0.379518	0.110664	0.066398	0.006036	0.002008	0.285141	0.552209	0.773092	1	0.044177	0.299197	0.526104	0.809237	0.985944	0.11245	0.226908	0.415663	0.646586	0.963855	0.644578	0.37827	0.01004	0.311245	0.512048	0.763052	0.987952	0.399598
0.369942	0.312139	0.317919	0.215116	0.255814	0.180233	0.011561	0.300578	0.50289	0.82659	1	0.040462	0.231214	0.543353	0.734104	0.99422	0.00578	0.202312	0.433526	0.66474	0.965318	0.34104	0.265896	0.393064	0.110465	0.063953	0.005814	0.00578	0.127168	0.491329	0.682081	1	0.011561	0.208092	0.526012	0.751445	0.83815	0.144509	0.306358	0.404624	0.861272	0.988439	0.358382	0.453488	0.017341	0.179191	0.479769	0.67052	0.965318	0.34104
0.411111	0.244444	0.344444	0.213483	0.280899	0.202247	0.044444	0.211111	0.511111	0.733333	0.977778	0.022222	0.222222	0.5	0.744444	1	0.011111	0.233333	0.411111	0.7	0.988889	0.3	0.344444	0.355556	0.078652	0.033708	0.011236	0.011111	0.066667	0.177778	0.811111	1	0.088889	0.411111	0.733333	0.888889	0.977778	0.188889	0.266667	0.5	0.588889	0.677778	0.444444	0.404494	0.033333	0.266667	0.433333	0.711111	0.955556	0.255556
0.369697	0.377778	0.252525	0.251012	0.198381	0.192308	0.00404	0.242424	0.547475	0.761616	0.99798	0.006061	0.193939	0.460606	0.747475	1	0.00202	0.29697	0.474747	0.731313	0.987879	0.517172	0.080808	0.40202	0.038462	0.082996	0.010121	0.00202	0.157576	0.432323	0.777778	1	0.076768	0.276768	0.39596	0.60202	0.672727	0.008081	0.361616	0.541414	0.765657	0.989899	0.448485	0.417004	0.014141	0.270707	0.466667	0.668687	0.987879	0.448485
0.401544	0.216216	0.382239	0.162791	0.302326	0.170543	0.007722	0.23166	0.46332	0.752896	0.992278	0.015444	0.339768	0.552124	0.683398	0.980695	0.003861	0.250965	0.486486	0.764479	1	0.389961	0.185328	0.42471	0.054264	0.093023	0	0.003861	0.158301	0.409266	0.675676	1	0.135135	0.305019	0.3861	0.610039	0.706564	0.030888	0.262548	0.517375	0.830116	0.988417	0.548263	0.44186	0.015444	0.23166	0.474903	0.675676	0.980695	0.235521
0.215517	0.543103	0.241379	0.208696	0.13913	0.252174	0.086207	0.267241	0.525862	0.62931	0.982759	0.017241	0.284483	0.508621	0.801724	1	0.008621	0.12069	0.362069	0.672414	0.965517	0.681034	0.224138	0.094828	0.104348	0.034783	0	0.008621	0.310345	0.543103	0.724138	1	0.094828	0.155172	0.353448	0.405172	0.810345	0.025862	0.034483	0.060345	0.956897	0.982759	0.387931	0.191304	0.025862	0.112069	0.327586	0.655172	0.965517	0.568966
0.346667	0.324848	0.328485	0.234223	0.230583	0.200243	0.002424	0.281212	0.547879	0.764848	1	0.008485	0.259394	0.511515	0.818182	0.997576	0.001212	0.214545	0.430303	0.665455	0.950303	0.408485	0.191515	0.4	0.076456	0.071602	0.015777	0.001212	0.237576	0.527273	0.833939	1	0.006061	0.289697	0.541818	0.749091	0.973333	0.014545	0.252121	0.46303	0.699394	0.945455	0.524848	0.424757	0.004848	0.219394	0.442424	0.733333	0.993939	0.315152
0.389091	0.4	0.210909	0.306569	0.160584	0.178832	0.007273	0.269091	0.516364	0.752727	0.996364	0.018182	0.250909	0.505455	0.781818	1	0.003636	0.207273	0.450909	0.614545	0.934545	0.494545	0.072727	0.432727	0.043796	0.072993	0	0.003636	0.163636	0.421818	0.810909	1	0.010909	0.083636	0.178182	0.276364	0.418182	0.12	0.429091	0.6	0.709091	0.930909	0.298182	0.306569	0.010909	0.254545	0.512727	0.647273	0.963636	0.385455
0.382524	0.328155	0.28932	0.27821	0.208171	0.200389	0.005825	0.219417	0.47767	0.749515	0.998058	0.003883	0.260194	0.518447	0.737864	0.982524	0.001942	0.252427	0.479612	0.743689	1	0.568932	0.186408	0.24466	0.066148	0.058366	0.007782	0.001942	0.198058	0.574757	0.75534	1	0.01165	0.357282	0.499029	0.798058	0.996117	0.085437	0.273786	0.438835	0.625243	0.986408	0.48932	0.350195	0.013592	0.304854	0.524272	0.790291	0.996117	0.341748
0.317627	0.373473	0.308901	0.237762	0.197552	0.237762	0.00349	0.25829	0.511344	0.776614	1	0.006981	0.239092	0.486911	0.712042	0.989529	0.001745	0.240838	0.506108	0.759162	0.998255	0.488656	0.17801	0.333333	0.066434	0.073427	0.01049	0.001745	0.172775	0.418848	0.677138	1	0.005236	0.376963	0.631763	0.762653	0.933682	0.017452	0.315881	0.516579	0.78534	0.99651	0.535777	0.332168	0.005236	0.286213	0.47993	0.762653	0.986038	0.385689
0.301136	0.400568	0.298295	0.225071	0.185185	0.239316	0.005682	0.176136	0.420455	0.644886	0.997159	0.014205	0.318182	0.568182	0.803977	1	0.002841	0.238636	0.454545	0.707386	0.985795	0.534091	0.190341	0.275568	0.068376	0.05698	0	0.002841	0.269886	0.525568	0.803977	1	0.045455	0.173295	0.332386	0.585227	0.826705	0.008523	0.255682	0.539773	0.721591	0.948864	0.471591	0.358974	0.017045	0.261364	0.556818	0.8125	0.991477	0.380682
0.306159	0.519928	0.173913	0.255898	0.098004	0.179673	0.005435	0.213768	0.568841	0.894928	1	0.003623	0.32971	0.512681	0.679348	0.998188	0.001812	0.188406	0.356884	0.67029	0.869565	0.748188	0.067029	0.184783	0.029038	0.043557	0	0.001812	0.311594	0.498188	0.684783	1	0.012681	0.134058	0.197464	0.230072	0.873188	0.028986	0.257246	0.802536	0.858696	0.994565	0.375	0.290381	0.007246	0.175725	0.396739	0.686594	0.994565	0.54529
0.362654	0.328704	0.308642	0.210201	0.22102	0.225657	0.00463	0.185185	0.496914	0.771605	1	0.003086	0.237654	0.481481	0.725309	0.986111	0.001543	0.285494	0.507716	0.757716	0.992284	0.442901	0.143519	0.41358	0.054096	0.081917	0.004637	0.001543	0.148148	0.408951	0.720679	1	0.057099	0.347222	0.513889	0.641975	0.760802	0.006173	0.316358	0.584877	0.82716	0.996914	0.540123	0.361669	0.007716	0.276235	0.481481	0.71142	0.992284	0.334877
0.317647	0.405882	0.276471	0.280236	0.179941	0.221239	0.011765	0.223529	0.523529	0.741176	0.997059	0.005882	0.226471	0.473529	0.697059	0.991176	0.002941	0.273529	0.564706	0.785294	1	0.482353	0.076471	0.441176	0.044248	0.085546	0.00295	0.002941	0.15	0.538235	0.797059	1	0.035294	0.129412	0.611765	0.952941	0.988235	0.082353	0.308824	0.467647	0.702941	0.908824	0.473529	0.39528	0.029412	0.282353	0.479412	0.732353	0.970588	0.444118
0.352632	0.384211	0.263158	0.306878	0.206349	0.169312	0.010526	0.247368	0.484211	0.747368	1	0.015789	0.263158	0.584211	0.826316	0.989474	0.005263	0.215789	0.389474	0.626316	0.978947	0.621053	0.157895	0.221053	0.068783	0.068783	0.005291	0.005263	0.184211	0.6	0.784211	1	0.136842	0.278947	0.384211	0.521053	0.973684	0.078947	0.236842	0.457895	0.747368	0.978947	0.347368	0.391534	0.131579	0.3	0.526316	0.805263	0.978947	0.363158
0.384236	0.197044	0.418719	0.108911	0.341584	0.188119	0.014778	0.275862	0.541872	0.719212	1	0.009852	0.157635	0.55665	0.827586	0.940887	0.004926	0.236453	0.438424	0.694581	0.970443	0.359606	0.246305	0.394089	0.089109	0.059406	0.009901	0.004926	0.128079	0.472906	0.82266	1	0.049261	0.275862	0.384236	0.729064	0.970443	0.133005	0.226601	0.55665	0.655172	0.8867	0.551724	0.475248	0.024631	0.256158	0.517241	0.753695	0.970443	0.167488
0.401763	0.241814	0.356423	0.181589	0.346784	0.184111	0.006297	0.253149	0.491184	0.739295	1	0.005038	0.251889	0.532746	0.74937	0.987406	0.001259	0.234257	0.479849	0.745592	0.998741	0.481108	0.234257	0.284635	0.094578	0.054224	0.001261	0.001259	0.209068	0.447103	0.738035	1	0.040302	0.211587	0.420655	0.798489	0.997481	0.006297	0.358942	0.575567	0.707809	0.992443	0.571788	0.401009	0.003778	0.245592	0.474811	0.739295	0.998741	0.260705
0.365591	0.301075	0.333333	0.204545	0.273923	0.22488	0.002389	0.281959	0.53644	0.76822	0.998805	0.004779	0.222222	0.452808	0.74552	1	0.001195	0.212664	0.477897	0.732378	0.997611	0.476703	0.23178	0.291517	0.09689	0.061005	0.003589	0.001195	0.23417	0.485066	0.739546	1	0.037037	0.194743	0.41816	0.801673	0.997611	0.005974	0.309438	0.55914	0.714456	0.991637	0.549582	0.397129	0.003584	0.264038	0.474313	0.749104	0.997611	0.339307
0.387597	0.302326	0.310078	0.21165	0.260194	0.196117	0.007752	0.251938	0.521318	0.755814	1	0.003876	0.265504	0.503876	0.746124	0.99031	0.001938	0.21124	0.467054	0.722868	0.984496	0.358527	0.075581	0.565891	0.029126	0.106796	0.001942	0.001938	0.222868	0.498062	0.757752	1	0.197674	0.261628	0.370155	0.478682	0.552326	0.003876	0.242248	0.560078	0.773256	0.994186	0.552326	0.403883	0.005814	0.26938	0.488372	0.736434	0.99031	0.348837
0.445026	0.293194	0.26178	0.273684	0.210526	0.142105	0.015707	0.267016	0.575916	0.790576	0.994764	0.010471	0.246073	0.418848	0.696335	1	0.005236	0.183246	0.434555	0.680628	0.979058	0.387435	0.209424	0.403141	0.073684	0.084211	0.010526	0.005236	0.267016	0.659686	0.853403	1	0.020942	0.193717	0.293194	0.460733	0.884817	0.08377	0.361257	0.544503	0.643979	0.984293	0.387435	0.378947	0.020942	0.235602	0.397906	0.623037	0.979058	0.267016
0.315789	0.404719	0.279492	0.249091	0.14	0.229091	0.00726	0.288566	0.529946	0.76588	0.998185	0.00363	0.206897	0.482759	0.745917	1	0.001815	0.284936	0.491833	0.725953	0.99637	0.433757	0.163339	0.402904	0.061818	0.087273	0.003636	0.001815	0.217786	0.479129	0.758621	1	0.058076	0.348457	0.566243	0.68784	0.994555	0.029038	0.23412	0.466425	0.722323	0.981851	0.526316	0.363636	0.009074	0.259528	0.45735	0.693285	0.99637	0.421053
0.37265	0.321368	0.305983	0.22774	0.239726	0.190068	0.003419	0.232479	0.482051	0.777778	1	0.008547	0.271795	0.528205	0.757265	0.998291	0.001709	0.22906	0.480342	0.702564	0.989744	0.494017	0.176068	0.329915	0.063356	0.070205	0.005137	0.001709	0.213675	0.475214	0.764103	1	0.042735	0.25812	0.452991	0.564103	0.704274	0.05812	0.283761	0.622222	0.837607	0.996581	0.466667	0.363014	0.006838	0.247863	0.488889	0.697436	0.996581	0.353846
0.285036	0.534442	0.180523	0.283333	0.116667	0.154762	0.004751	0.19715	0.384798	0.63658	0.995249	0.016627	0.406176	0.631829	0.814727	0.997625	0.002375	0.125891	0.299287	0.501188	1	0.726841	0.149644	0.123515	0.059524	0.035714	0.002381	0.002375	0.437055	0.619952	0.807601	1	0.019002	0.114014	0.230404	0.330166	0.928741	0.009501	0.066508	0.263658	0.35867	0.895487	0.638955	0.242857	0.016627	0.36342	0.591449	0.767221	0.988124	0.505938
0.492537	0.268657	0.238806	0.287879	0.363636	0.075758	0.029851	0.253731	0.462687	0.731343	1	0.044776	0.179104	0.507463	0.61194	0.955224	0.014925	0.208955	0.41791	0.686567	0.895522	0.19403	0	0.80597	0	0.090909	0	0.014925	0.044776	0.567164	0.940299	1	0	0	0	0	0	0.059701	0.268657	0.477612	0.716418	0.925373	0.313433	0.454545	0.089552	0.313433	0.432836	0.641791	0.895522	0.283582
0.377823	0.340862	0.281314	0.263374	0.193416	0.183128	0.004107	0.246407	0.505133	0.770021	0.997947	0.008214	0.250513	0.517454	0.767967	1	0.002053	0.234086	0.474333	0.698152	0.98768	0.525667	0.164271	0.310062	0.076132	0.076132	0.002058	0.002053	0.205339	0.529774	0.800821	1	0.024641	0.135524	0.474333	0.804928	0.98768	0.008214	0.36345	0.494867	0.683778	0.944559	0.466119	0.329218	0.008214	0.377823	0.511294	0.755647	0.98768	0.342916
0.327526	0.310105	0.362369	0.202797	0.276224	0.230769	0.045296	0.275261	0.54007	0.790941	1	0.006969	0.195122	0.480836	0.66899	0.982578	0.003484	0.25784	0.477352	0.735192	0.993031	0.397213	0.1777	0.425087	0.052448	0.08042	0.003497	0.003484	0.202091	0.529617	0.71777	1	0.006969	0.261324	0.393728	0.595819	0.686411	0.034843	0.240418	0.505226	0.794425	0.961672	0.550523	0.405594	0.006969	0.233449	0.445993	0.658537	0.993031	0.324042
0.279245	0.366038	0.354717	0.200758	0.231061	0.238636	0.026415	0.271698	0.464151	0.773585	0.996226	0.007547	0.181132	0.498113	0.720755	0.984906	0.003774	0.283019	0.520755	0.724528	1	0.418868	0.29434	0.286792	0.087121	0.041667	0.003788	0.003774	0.207547	0.50566	0.690566	1	0.124528	0.222642	0.460377	0.713208	0.856604	0.018868	0.362264	0.539623	0.920755	0.992453	0.566038	0.386364	0.011321	0.267925	0.509434	0.728302	0.988679	0.388679
0.306285	0.39101	0.302705	0.223637	0.19618	0.238758	0.000796	0.250597	0.491249	0.753381	1	0.001193	0.243039	0.51432	0.744232	0.999602	0.000398	0.253779	0.487271	0.74821	0.998011	0.488067	0.189737	0.322196	0.072423	0.063669	0.007163	0.000398	0.274861	0.535004	0.729515	1	0.001193	0.214002	0.38027	0.64996	0.998011	0.005171	0.246221	0.49642	0.809069	0.995227	0.539777	0.381218	0.001591	0.247017	0.484487	0.768894	0.998807	0.410899
0.33945	0.394495	0.266055	0.198157	0.239631	0.225806	0.022936	0.188073	0.522936	0.697248	1	0.009174	0.256881	0.568807	0.834862	0.995413	0.004587	0.229358	0.408257	0.642202	0.986239	0.481651	0.165138	0.353211	0.096774	0.087558	0.004608	0.004587	0.266055	0.59633	0.816514	1	0.215596	0.344037	0.412844	0.541284	0.922018	0.013761	0.12844	0.316514	0.738532	0.972477	0.522936	0.40553	0.013761	0.321101	0.610092	0.811927	0.986239	0.366972
0.376825	0.415146	0.208029	0.308676	0.174429	0.155251	0.00365	0.247263	0.512774	0.741788	1	0.001825	0.20073	0.471715	0.738139	0.999088	0.000912	0.355839	0.541971	0.788321	0.998175	0.740876	0.059307	0.199818	0.03653	0.051142	0.003653	0.000912	0.215328	0.458942	0.698905	1	0.02281	0.399635	0.455292	0.643248	0.946168	0.010949	0.414234	0.809307	0.868613	0.933394	0.362226	0.336073	0.004562	0.32573	0.559307	0.788321	0.998175	0.423358
0.273141	0.494689	0.23217	0.226444	0.12614	0.215805	0.030349	0.209408	0.488619	0.707132	0.995448	0.003035	0.227618	0.479514	0.748103	1	0.001517	0.329287	0.52959	0.772382	0.996965	0.637329	0.098634	0.264036	0.042553	0.066869	0.00304	0.001517	0.283763	0.626707	0.792109	1	0.353566	0.421851	0.518968	0.925645	0.996965	0.007587	0.162367	0.29742	0.447648	0.989378	0.538695	0.319149	0.010622	0.330804	0.581184	0.763278	0.998483	0.517451
0.331742	0.272076	0.396181	0.141148	0.26555	0.246411	0.004773	0.243437	0.472554	0.761337	0.99284	0.009547	0.188544	0.455847	0.725537	0.988067	0.002387	0.286396	0.544153	0.747017	1	0.348449	0.088305	0.563246	0.038278	0.105263	0.004785	0.002387	0.188544	0.477327	0.656325	1	0.004773	0.062053	0.138425	0.224344	0.293556	0.019093	0.381862	0.577566	0.799523	0.995227	0.601432	0.37799	0.00716	0.257757	0.48926	0.73031	0.997613	0.26969
0.367089	0.299578	0.333333	0.182203	0.237288	0.224576	0.008439	0.223629	0.472574	0.797468	1	0.012658	0.244726	0.514768	0.755274	0.995781	0.004219	0.227848	0.489451	0.675105	0.991561	0.291139	0.042194	0.666667	0.021186	0.088983	0.004237	0.004219	0.392405	0.683544	0.805907	1	0.485232	0.489451	0.662447	0.670886	0.818565	0.012658	0.194093	0.409283	0.624473	0.987342	0.540084	0.372881	0.025316	0.303797	0.493671	0.662447	0.970464	0.362869
0.414269	0.357883	0.227848	0.275346	0.15553	0.172811	0.009206	0.30725	0.591484	0.818182	0.998849	0.002301	0.216341	0.504028	0.735328	1	0.001151	0.207135	0.365938	0.555811	0.995397	0.513234	0.113924	0.372842	0.043779	0.085253	0.006912	0.001151	0.296893	0.573072	0.736479	1	0.04603	0.188723	0.322209	0.448792	0.904488	0.013809	0.247411	0.483314	0.777906	0.996548	0.410817	0.31106	0.011507	0.209436	0.38435	0.703107	0.995397	0.43038
0.314721	0.527919	0.15736	0.346939	0.107143	0.112245	0.030457	0.238579	0.532995	0.71066	1	0.010152	0.284264	0.563452	0.80203	0.994924	0.005076	0.15736	0.28934	0.482234	0.857868	0.375635	0.248731	0.375635	0.035714	0.066327	0.015306	0.005076	0.253807	0.746193	0.888325	1	0.06599	0.411168	0.472081	0.543147	0.86802	0.055838	0.218274	0.340102	0.695431	0.969543	0.335025	0.326531	0.06599	0.19797	0.340102	0.497462	0.923858	0.548223
0.388704	0.303987	0.307309	0.219634	0.242928	0.1797	0.003322	0.275748	0.516611	0.795681	0.998339	0.004983	0.237542	0.503322	0.715947	0.993355	0.001661	0.217608	0.453488	0.717608	1	0.503322	0.181063	0.315615	0.071547	0.058236	0.001664	0.001661	0.260797	0.538206	0.770764	1	0.038206	0.164452	0.475083	0.60299	0.976744	0.066445	0.249169	0.430233	0.807309	0.975083	0.501661	0.339434	0.006645	0.222591	0.465116	0.709302	0.996678	0.322259
0.341463	0.317073	0.341463	0.208889	0.244444	0.197778	0.004435	0.277162	0.485588	0.736142	0.995565	0.011086	0.266075	0.529933	0.762749	1	0.002217	0.210643	0.454545	0.738359	0.991131	0.392461	0.119734	0.487805	0.053333	0.084444	0	0.002217	0.379157	0.572062	0.773836	1	0.416851	0.583149	0.745011	0.91796	0.993348	0.013304	0.168514	0.332594	0.611973	0.906874	0.585366	0.337778	0.008869	0.235033	0.494457	0.700665	0.988914	0.345898
0.41875	0.34375	0.2375	0.238994	0.220126	0.138365	0.05	0.25625	0.4875	0.75625	1	0.0125	0.225	0.63125	0.85625	0.98125	0.00625	0.15625	0.39375	0.56875	0.7625	0.69375	0.0875	0.21875	0.081761	0.069182	0.006289	0.00625	0.24375	0.50625	0.825	1	0.15	0.1625	0.43125	0.55625	0.625	0.10625	0.19375	0.3875	0.7	0.75625	0.3375	0.339623	0.025	0.18125	0.4125	0.58125	0.90625	0.34375
0.344086	0.333333	0.322581	0.282609	0.206522	0.304348	0.032258	0.290323	0.526882	0.698925	1	0.021505	0.215054	0.451613	0.83871	0.989247	0.010753	0.204301	0.483871	0.655914	0.946237	0.333333	0.365591	0.301075	0.130435	0.043478	0	0.010753	0.11828	0.419355	0.784946	1	0.053763	0.365591	0.698925	0.860215	0.956989	0.150538	0.215054	0.430108	0.505376	0.580645	0.526882	0.326087	0.053763	0.215054	0.397849	0.602151	0.946237	0.354839
0.334247	0.386301	0.279452	0.255144	0.183813	0.1893	0.00274	0.228767	0.482192	0.715068	0.99589	0.00411	0.319178	0.636986	0.857534	0.99863	0.00137	0.216438	0.4	0.587671	1	0.49589	0.050685	0.453425	0.032922	0.093278	0.002743	0.00137	0.445205	0.683562	0.871233	1	0.009589	0.646575	0.676712	0.741096	0.889041	0.020548	0.191781	0.334247	0.478082	0.856164	0.491781	0.386831	0.005479	0.224658	0.471233	0.79589	0.99726	0.442466
0.354545	0.336364	0.309091	0.275229	0.220183	0.211009	0.018182	0.190909	0.436364	0.709091	0.990909	0.027273	0.290909	0.545455	0.781818	1	0.009091	0.2	0.472727	0.654545	0.972727	0.527273	0.227273	0.245455	0.091743	0.073394	0	0.009091	0.127273	0.445455	0.8	1	0.372727	0.590909	0.645455	0.763636	0.890909	0.145455	0.2	0.318182	0.5	0.563636	0.372727	0.422018	0.054545	0.254545	0.5	0.654545	0.972727	0.336364
0.329365	0.39881	0.271825	0.272366	0.192843	0.182903	0.005952	0.230159	0.468254	0.755952	0.998016	0.019841	0.202381	0.448413	0.71627	1	0.001984	0.35119	0.559524	0.785714	0.996032	0.464286	0.073413	0.462302	0.027833	0.087475	0.003976	0.001984	0.130952	0.339286	0.666667	1	0.599206	0.662698	0.839286	0.89881	0.974206	0.007937	0.349206	0.511905	0.75	0.996032	0.376984	0.290258	0.003968	0.515873	0.678571	0.847222	0.996032	0.44246
0.371901	0.438017	0.190083	0.274834	0.134106	0.15894	0.014876	0.249587	0.47438	0.707438	1	0.003306	0.22314	0.552066	0.801653	0.998347	0.001653	0.271074	0.442975	0.680992	0.993388	0.766942	0.049587	0.183471	0.019868	0.033113	0.003311	0.001653	0.284298	0.616529	0.808264	1	0.216529	0.300826	0.358678	0.408264	0.547107	0.008264	0.173554	0.266116	0.461157	0.606612	0.385124	0.357616	0.008264	0.264463	0.471074	0.704132	0.960331	0.446281
0.369942	0.369942	0.260116	0.284884	0.197674	0.238372	0.011561	0.202312	0.445087	0.803468	1	0.023121	0.260116	0.49711	0.716763	0.99422	0.00578	0.254335	0.520231	0.710983	0.965318	0.566474	0.179191	0.254335	0.052326	0.075581	0.005814	0.00578	0.17341	0.34104	0.624277	1	0.242775	0.393064	0.635838	0.682081	0.884393	0.023121	0.491329	0.734104	0.797688	0.965318	0.549133	0.337209	0.023121	0.33526	0.554913	0.710983	0.965318	0.398844
0.318072	0.433735	0.248193	0.2657	0.169082	0.214976	0.004819	0.214458	0.481928	0.725301	0.990361	0.007229	0.260241	0.515663	0.785542	1	0.00241	0.26988	0.520482	0.718072	0.992771	0.583133	0.151807	0.26506	0.067633	0.082126	0	0.00241	0.286747	0.549398	0.8	1	0.115663	0.298795	0.46988	0.648193	0.763855	0.007229	0.091566	0.486747	0.718072	0.987952	0.46506	0.381643	0.007229	0.296386	0.583133	0.792771	0.995181	0.428916
0.377301	0.325153	0.297546	0.230769	0.24	0.193846	0.006135	0.193252	0.466258	0.708589	1	0.039877	0.349693	0.576687	0.779141	0.996933	0.003067	0.236196	0.444785	0.693252	0.978528	0.53681	0.263804	0.199387	0.104615	0.055385	0.012308	0.003067	0.251534	0.466258	0.754601	1	0.042945	0.312883	0.555215	0.702454	0.935583	0.067485	0.138037	0.503067	0.846626	0.98773	0.503067	0.356923	0.042945	0.343558	0.527607	0.757669	0.978528	0.315951
0.406204	0.355982	0.237814	0.281065	0.183432	0.173077	0.004431	0.264402	0.539143	0.788774	0.995569	0.002954	0.286558	0.586411	0.759232	1	0.001477	0.187592	0.373708	0.54062	0.998523	0.556869	0.144756	0.298375	0.050296	0.065089	0.011834	0.001477	0.361891	0.635155	0.799114	1	0.007386	0.096012	0.190547	0.435746	0.874446	0.115214	0.29099	0.412112	0.655835	0.994092	0.415066	0.352071	0.005908	0.193501	0.389956	0.595273	0.994092	0.385524
0.391129	0.403226	0.205645	0.275304	0.190283	0.161943	0.012097	0.306452	0.540323	0.790323	1	0.008065	0.165323	0.5	0.717742	0.959677	0.004032	0.262097	0.423387	0.725806	0.979839	0.762097	0.104839	0.133065	0.040486	0.040486	0	0.004032	0.217742	0.560484	0.75	1	0.048387	0.185484	0.294355	0.350806	0.459677	0.221774	0.25	0.391129	0.895161	0.991935	0.407258	0.380567	0.016129	0.193548	0.395161	0.649194	0.979839	0.483871
0.512465	0.3241	0.163435	0.297222	0.152778	0.091667	0.019391	0.32964	0.559557	0.792244	0.98892	0.00554	0.185596	0.33795	0.587258	0.99446	0.00277	0.315789	0.567867	0.781163	1	0.401662	0.027701	0.570637	0.011111	0.072222	0	0.00277	0.157895	0.288089	0.534626	1	0.548476	0.551247	0.559557	0.565097	0.781163	0.01108	0.385042	0.65928	0.828255	0.98892	0.174515	0.255556	0.01108	0.32133	0.65374	0.775623	0.99169	0.34349
0.254902	0.511765	0.233333	0.227898	0.129666	0.206287	0.015686	0.207843	0.427451	0.727451	0.996078	0.005882	0.288235	0.562745	0.74902	1	0.001961	0.231373	0.464706	0.713725	0.998039	0.631373	0.133333	0.235294	0.05501	0.047151	0.003929	0.001961	0.25098	0.498039	0.698039	1	0.098039	0.166667	0.372549	0.837255	0.937255	0.013725	0.392157	0.641176	0.878431	0.988235	0.511765	0.369352	0.005882	0.307843	0.564706	0.72549	0.992157	0.509804
0.358491	0.320755	0.320755	0.115385	0.288462	0.230769	0.056604	0.150943	0.54717	0.773585	1	0.037736	0.207547	0.396226	0.490566	0.90566	0.018868	0.320755	0.528302	0.735849	0.981132	0.566038	0.075472	0.358491	0.076923	0.076923	0	0.018868	0.132075	0.283019	0.471698	1	0.320755	0.320755	0.339623	0.358491	0.962264	0.490566	0.54717	0.679245	0.773585	0.867925	0.320755	0.346154	0.320755	0.509434	0.622642	0.735849	0.924528	0.320755
0.365714	0.354286	0.28	0.224138	0.195402	0.224138	0.017143	0.188571	0.491429	0.777143	1	0.011429	0.285714	0.514286	0.76	0.988571	0.005714	0.245714	0.445714	0.657143	0.977143	0.382857	0.08	0.537143	0.034483	0.08046	0	0.005714	0.091429	0.474286	0.902857	1	0.411429	0.422857	0.445714	0.48	0.514286	0.12	0.262857	0.56	0.72	0.897143	0.485714	0.413793	0.04	0.268571	0.52	0.731429	0.977143	0.337143
0.289662	0.450358	0.25998	0.242828	0.148566	0.240779	0.004094	0.185261	0.455476	0.763562	0.998976	0.002047	0.27738	0.524053	0.74002	0.997953	0.001024	0.254862	0.451382	0.743091	1	0.576254	0.107472	0.316274	0.04918	0.071721	0.004098	0.001024	0.323439	0.576254	0.787103	1	0.037871	0.174002	0.30911	0.433982	0.995906	0.047083	0.209826	0.418628	0.735926	0.993859	0.426817	0.432377	0.012282	0.283521	0.510747	0.77175	0.995906	0.456499
0.320755	0.396226	0.283019	0.247619	0.219048	0.190476	0.09434	0.226415	0.575472	0.745283	1	0.018868	0.283019	0.528302	0.801887	0.981132	0.009434	0.188679	0.377358	0.59434	0.943396	0.424528	0.575472	0	0.171429	0	0	0.009434	0.292453	0.613208	0.792453	1	0.018868	0.198113	0.386792	0.669811	0.95283	0	0	0	0	0	0.358491	0.47619	0.018868	0.188679	0.443396	0.679245	0.943396	0.339623
0.436782	0.350575	0.212644	0.33526	0.156069	0.150289	0.017241	0.218391	0.494253	0.758621	1	0.011494	0.258621	0.488506	0.729885	0.971264	0.005747	0.229885	0.45977	0.683908	0.867816	0.574713	0.178161	0.247126	0.121387	0.052023	0.00578	0.005747	0.247126	0.465517	0.816092	1	0.022989	0.431034	0.591954	0.695402	0.867816	0.04023	0.166667	0.298851	0.551724	0.770115	0.33908	0.346821	0.022989	0.287356	0.482759	0.678161	0.856322	0.385057
0.5	0.164062	0.335938	0.165354	0.362205	0.102362	0.039062	0.296875	0.570312	0.789062	1	0.023438	0.195312	0.476562	0.726562	0.914062	0.007812	0.179688	0.382812	0.65625	0.945312	0.429688	0.234375	0.335938	0.062992	0.07874	0	0.007812	0.179688	0.523438	0.65625	1	0.195312	0.242188	0.328125	0.40625	0.5	0.085938	0.15625	0.726562	0.84375	0.960938	0.359375	0.425197	0.046875	0.273438	0.484375	0.75	0.945312	0.234375
0.410909	0.250909	0.338182	0.222628	0.30292	0.164234	0.010909	0.250909	0.516364	0.796364	0.996364	0.014545	0.247273	0.505455	0.636364	0.992727	0.003636	0.218182	0.447273	0.734545	1	0.370909	0.174545	0.454545	0.051095	0.080292	0	0.003636	0.189091	0.425455	0.672727	1	0.12	0.283636	0.363636	0.567273	0.658182	0.021818	0.254545	0.698182	0.821818	0.985455	0.545455	0.408759	0.029091	0.232727	0.454545	0.654545	0.978182	0.261818
0.36129	0.383871	0.254839	0.275081	0.168285	0.203883	0.006452	0.23871	0.483871	0.735484	1	0.009677	0.229032	0.493548	0.770968	0.990323	0.003226	0.251613	0.496774	0.712903	0.993548	0.651613	0.077419	0.270968	0.032362	0.090615	0	0.003226	0.241935	0.522581	0.741935	1	0.248387	0.264516	0.674194	0.83871	0.993548	0.022581	0.209677	0.332258	0.709677	0.909677	0.309677	0.355987	0.009677	0.174194	0.448387	0.696774	0.993548	0.393548
0.2134	0.506203	0.280397	0.176617	0.121891	0.288557	0.012407	0.203474	0.406948	0.66005	0.990074	0.004963	0.28536	0.558313	0.801489	1	0.002481	0.218362	0.424318	0.669975	0.992556	0.585608	0.171216	0.243176	0.069652	0.049751	0	0.002481	0.295285	0.531017	0.801489	1	0.039702	0.129032	0.290323	0.615385	0.905707	0.096774	0.208437	0.419355	0.756824	0.985112	0.516129	0.378109	0.039702	0.28536	0.513648	0.813896	0.992556	0.513648
0.352227	0.340081	0.307692	0.272358	0.223577	0.178862	0.020243	0.263158	0.550607	0.805668	0.995951	0.02834	0.251012	0.510121	0.757085	1	0.004049	0.190283	0.421053	0.688259	0.967611	0.437247	0.182186	0.380567	0.056911	0.065041	0.00813	0.004049	0.364372	0.753036	0.874494	1	0.133603	0.190283	0.340081	0.578947	0.834008	0.016194	0.105263	0.404858	0.566802	0.983806	0.425101	0.406504	0.032389	0.226721	0.449393	0.623482	0.967611	0.299595
0.37234	0.297872	0.329787	0.215054	0.247312	0.193548	0.021277	0.212766	0.478723	0.755319	1	0.042553	0.329787	0.468085	0.670213	0.93617	0.010638	0.159574	0.510638	0.797872	0.968085	0.329787	0.297872	0.37234	0.107527	0.064516	0.021505	0.010638	0.148936	0.468085	0.606383	1	0.042553	0.106383	0.521277	0.659574	0.968085	0.170213	0.244681	0.340426	0.808511	0.93617	0.489362	0.430108	0.042553	0.234043	0.521277	0.712766	0.968085	0.276596
0.4	0.363636	0.236364	0.259259	0.185185	0.111111	0.054545	0.236364	0.581818	0.745455	0.981818	0.036364	0.272727	0.381818	0.563636	0.854545	0.018182	0.163636	0.363636	0.781818	1	0.509091	0.490909	0	0.148148	0	0	0.018182	0.290909	0.509091	0.709091	1	0.127273	0.218182	0.418182	0.818182	0.945455	0	0	0	0	0	0.327273	0.407407	0.163636	0.254545	0.418182	0.672727	0.909091	0.327273
0.401575	0.23622	0.362205	0.198413	0.373016	0.142857	0.047244	0.267717	0.551181	0.748031	0.968504	0.015748	0.125984	0.519685	0.811024	1	0.007874	0.212598	0.425197	0.677165	0.976378	0.464567	0.496063	0.03937	0.15873	0.031746	0	0.007874	0.346457	0.614173	0.818898	1	0.015748	0.165354	0.362205	0.590551	0.905512	0.850394	0.850394	0.858268	0.866142	0.968504	0.354331	0.460317	0.015748	0.19685	0.409449	0.606299	0.976378	0.23622
0.348361	0.385246	0.266393	0.255144	0.209877	0.222222	0.016393	0.241803	0.483607	0.811475	1	0.008197	0.245902	0.545082	0.786885	0.983607	0.004098	0.229508	0.434426	0.606557	0.852459	0.459016	0.336066	0.204918	0.106996	0.074074	0.00823	0.004098	0.348361	0.622951	0.79918	1	0.020492	0.188525	0.385246	0.54918	0.778689	0.077869	0.209016	0.581967	0.844262	0.963115	0.393443	0.395062	0.020492	0.22541	0.401639	0.610656	0.946721	0.405738
0.359736	0.330033	0.310231	0.261589	0.192053	0.241722	0.013201	0.264026	0.452145	0.759076	1	0.006601	0.254125	0.544554	0.735974	0.993399	0.0033	0.221122	0.514851	0.726073	0.980198	0.491749	0.181518	0.326733	0.069536	0.076159	0.009934	0.0033	0.30033	0.518152	0.772277	1	0.059406	0.125413	0.570957	0.775578	0.943894	0.023102	0.237624	0.462046	0.712871	0.966997	0.429043	0.397351	0.016502	0.214521	0.438944	0.693069	0.993399	0.382838
0.419162	0.371257	0.209581	0.319277	0.156627	0.186747	0.023952	0.329341	0.586826	0.838323	1	0.011976	0.221557	0.437126	0.724551	0.976048	0.005988	0.113772	0.383234	0.616766	0.862275	0.550898	0.155689	0.293413	0.078313	0.078313	0.006024	0.005988	0.203593	0.467066	0.748503	1	0.083832	0.113772	0.245509	0.317365	0.868263	0.371257	0.502994	0.664671	0.784431	0.94012	0.299401	0.337349	0.035928	0.167665	0.401198	0.670659	0.862275	0.377246
0.405063	0.348101	0.246835	0.282092	0.196513	0.169572	0.003165	0.261076	0.52057	0.787975	0.995253	0.015823	0.280063	0.572785	0.781646	1	0.001582	0.199367	0.39557	0.620253	0.998418	0.530063	0.183544	0.286392	0.07607	0.050713	0.006339	0.001582	0.273734	0.617089	0.848101	1	0.007911	0.129747	0.27057	0.504747	0.993671	0.123418	0.299051	0.427215	0.661392	0.898734	0.463608	0.399366	0.006329	0.223101	0.43038	0.670886	0.993671	0.375
0.435685	0.360996	0.20332	0.333333	0.229167	0.158333	0.012448	0.278008	0.502075	0.738589	1	0.008299	0.224066	0.460581	0.717842	0.995851	0.004149	0.232365	0.489627	0.780083	0.991701	0.585062	0.120332	0.294606	0.075	0.091667	0	0.004149	0.319502	0.560166	0.717842	1	0.058091	0.33195	0.763485	0.846473	0.991701	0.020747	0.161826	0.26556	0.692946	0.929461	0.340249	0.466667	0.062241	0.273859	0.59751	0.792531	0.991701	0.410788
0.390244	0.280488	0.329268	0.17284	0.308642	0.197531	0.02439	0.280488	0.597561	0.792683	1	0.073171	0.170732	0.329268	0.560976	0.902439	0.012195	0.256098	0.47561	0.731707	0.963415	0.634146	0.268293	0.097561	0.123457	0.024691	0	0.012195	0.231707	0.52439	0.841463	1	0.134146	0.182927	0.304878	0.426829	0.621951	0.682927	0.695122	0.719512	0.743902	0.768293	0.353659	0.395062	0.060976	0.268293	0.45122	0.54878	0.804878	0.304878
0.321637	0.340643	0.337719	0.204978	0.222548	0.238653	0.010234	0.290936	0.545322	0.783626	0.991228	0.002924	0.23538	0.482456	0.726608	1	0.001462	0.222222	0.473684	0.74269	0.998538	0.432749	0.241228	0.326023	0.098097	0.051245	0.001464	0.001462	0.214912	0.464912	0.697368	1	0.017544	0.24269	0.562865	0.80117	0.95614	0.089181	0.333333	0.495614	0.766082	0.99269	0.574561	0.38653	0.017544	0.23538	0.459064	0.711988	0.994152	0.342105
0.372093	0.348837	0.27907	0.242991	0.172897	0.196262	0.013953	0.27907	0.534884	0.72093	1	0.009302	0.195349	0.35814	0.655814	0.990698	0.004651	0.353488	0.604651	0.818605	0.972093	0.525581	0.148837	0.325581	0.102804	0.065421	0	0.004651	0.265116	0.395349	0.646512	1	0.018605	0.074419	0.576744	0.748837	0.930233	0.097674	0.190698	0.548837	0.795349	0.986047	0.497674	0.345794	0.018605	0.32093	0.506977	0.75814	0.986047	0.32093
0.352723	0.30198	0.345297	0.206939	0.262701	0.221809	0.002475	0.263614	0.537129	0.758663	1	0.00495	0.257426	0.466584	0.722772	0.99505	0.001238	0.232673	0.49505	0.757426	0.998762	0.469059	0.243812	0.287129	0.094176	0.052045	0.002478	0.001238	0.231436	0.486386	0.752475	1	0.039604	0.201733	0.418317	0.74505	0.962871	0.006188	0.315594	0.538366	0.701733	0.992574	0.575495	0.406444	0.003713	0.256188	0.470297	0.737624	0.998762	0.310644
0.260274	0.452055	0.287671	0.21978	0.181319	0.244505	0.005479	0.210959	0.441096	0.750685	0.980822	0.008219	0.290411	0.550685	0.747945	1	0.00274	0.205479	0.435616	0.706849	0.991781	0.539726	0.2	0.260274	0.082418	0.038462	0	0.00274	0.290411	0.542466	0.712329	1	0.032877	0.134247	0.309589	0.79726	0.926027	0.09589	0.216438	0.449315	0.865753	0.99726	0.468493	0.39011	0.038356	0.276712	0.506849	0.720548	0.972603	0.468493
0.387387	0.288288	0.324324	0.245455	0.263636	0.227273	0.027027	0.189189	0.405405	0.720721	0.981982	0.036036	0.198198	0.504505	0.765766	0.990991	0.009009	0.351351	0.495495	0.711712	1	0.504505	0.243243	0.252252	0.090909	0.054545	0	0.009009	0.18018	0.351351	0.81982	1	0.099099	0.279279	0.558559	0.675676	0.936937	0.045045	0.396396	0.459459	0.738739	0.801802	0.405405	0.436364	0.045045	0.306306	0.531532	0.684685	0.972973	0.288288
0.341463	0.341463	0.317073	0.273469	0.195918	0.208163	0.00813	0.215447	0.443089	0.756098	1	0.01626	0.308943	0.528455	0.760163	0.98374	0.004065	0.235772	0.49187	0.719512	0.995935	0.390244	0.012195	0.597561	0.004082	0.142857	0.012245	0.004065	0.378049	0.544715	0.739837	1	0.414634	0.414634	0.414634	0.418699	0.49187	0.012195	0.178862	0.434959	0.752033	0.99187	0.54878	0.408163	0.01626	0.252033	0.50813	0.703252	0.98374	0.353659
0.337143	0.491429	0.171429	0.332378	0.174785	0.120344	0.008571	0.225714	0.431429	0.642857	1	0.005714	0.377143	0.682857	0.851429	0.994286	0.002857	0.154286	0.3	0.46	0.625714	0.585714	0.14	0.274286	0.045845	0.051576	0	0.002857	0.445714	0.665714	0.837143	1	0.028571	0.16	0.214286	0.425714	0.577143	0.077143	0.24	0.357143	0.471429	0.991429	0.428571	0.401146	0.014286	0.191429	0.391429	0.557143	0.925714	0.5
0.362934	0.378378	0.258687	0.290698	0.197674	0.158915	0.007722	0.23166	0.517375	0.76834	0.980695	0.011583	0.181467	0.382239	0.710425	0.996139	0.003861	0.355212	0.606178	0.752896	1	0.571429	0.196911	0.23166	0.046512	0.069767	0.015504	0.003861	0.146718	0.305019	0.633205	1	0.316602	0.401544	0.532819	0.756757	0.996139	0.023166	0.459459	0.671815	0.837838	0.942085	0.42471	0.317829	0.019305	0.3861	0.563707	0.737452	0.992278	0.409266
0.31411	0.364417	0.321472	0.210074	0.246929	0.230958	0.002454	0.280982	0.531288	0.757055	0.998773	0.004908	0.235583	0.480982	0.746012	1	0.001227	0.238037	0.493252	0.748466	0.997546	0.46135	0.245399	0.293252	0.095823	0.061425	0.004914	0.001227	0.207362	0.457669	0.728834	1	0.039264	0.257669	0.422086	0.809816	0.997546	0.006135	0.320245	0.573006	0.732515	0.991411	0.561963	0.415233	0.003681	0.257669	0.469939	0.739877	0.997546	0.402454
0.398649	0.297297	0.304054	0.244898	0.238095	0.14966	0.013514	0.22973	0.418919	0.716216	1	0.02027	0.297297	0.533784	0.844595	0.993243	0.006757	0.222973	0.5	0.702703	0.97973	0.25	0	0.75	0	0.108844	0	0.006757	0.263514	0.527027	0.797297	1	0	0	0	0	0	0.013514	0.216216	0.452703	0.716216	0.945946	0.513514	0.394558	0.027027	0.297297	0.52027	0.695946	0.905405	0.290541
0.394737	0.328947	0.276316	0.246696	0.202643	0.180617	0.013158	0.236842	0.464912	0.723684	0.986842	0.008772	0.25	0.513158	0.785088	1	0.004386	0.201754	0.473684	0.666667	0.995614	0.324561	0.118421	0.557018	0.044053	0.096916	0	0.004386	0.135965	0.539474	0.745614	1	0.013158	0.399123	0.780702	0.842105	0.881579	0.04386	0.267544	0.460526	0.618421	0.97807	0.504386	0.334802	0.008772	0.20614	0.469298	0.671053	0.991228	0.320175
0.324324	0.388514	0.287162	0.240678	0.166102	0.264407	0.006757	0.287162	0.513514	0.790541	0.996622	0.013514	0.209459	0.476351	0.739865	1	0.003378	0.253378	0.5	0.682432	0.989865	0.432432	0.158784	0.408784	0.047458	0.088136	0	0.003378	0.148649	0.432432	0.709459	1	0.219595	0.310811	0.452703	0.648649	0.733108	0.074324	0.273649	0.533784	0.824324	0.976351	0.527027	0.359322	0.013514	0.27027	0.486486	0.685811	0.966216	0.429054
0.306931	0.39604	0.29703	0.21	0.22	0.29	0.069307	0.306931	0.49505	0.861386	1	0.019802	0.158416	0.415842	0.693069	0.980198	0.009901	0.267327	0.514851	0.653465	0.990099	0.405941	0.178218	0.415842	0.06	0.04	0	0.009901	0.128713	0.405941	0.623762	1	0.069307	0.475248	0.524752	0.564356	0.663366	0.178218	0.267327	0.772277	0.871287	0.980198	0.445545	0.5	0.029703	0.237624	0.524752	0.693069	0.950495	0.39604
0.349345	0.355167	0.295488	0.247813	0.225948	0.186589	0.002911	0.269287	0.532751	0.761281	1	0.014556	0.243086	0.499272	0.742358	0.994178	0.001456	0.234352	0.462882	0.730713	0.998544	0.365357	0.211063	0.423581	0.102041	0.075802	0.005831	0.001456	0.259098	0.491994	0.820961	1	0.008734	0.206696	0.416303	0.88064	0.997089	0.032023	0.285298	0.540029	0.681223	0.925764	0.534207	0.393586	0.010189	0.247453	0.467249	0.69869	0.998544	0.378457
0.460208	0.256055	0.283737	0.232639	0.263889	0.135417	0.010381	0.238754	0.449827	0.754325	1	0.00692	0.15917	0.463668	0.6609	0.989619	0.00346	0.352941	0.557093	0.761246	0.99308	0.487889	0.16609	0.346021	0.059028	0.052083	0.003472	0.00346	0.145329	0.384083	0.681661	1	0.072664	0.432526	0.581315	0.847751	0.892734	0.148789	0.304498	0.515571	0.757785	0.965398	0.408304	0.361111	0.069204	0.394464	0.570934	0.775087	0.965398	0.301038
0.342357	0.356688	0.300955	0.236045	0.220096	0.218501	0.003185	0.213376	0.414013	0.694268	0.993631	0.007962	0.242038	0.542994	0.737261	1	0.001592	0.30414	0.523885	0.778662	0.996815	0.514331	0.171975	0.313694	0.057416	0.073365	0.00319	0.001592	0.154459	0.466561	0.711783	1	0.017516	0.211783	0.436306	0.773885	0.893312	0.179936	0.36465	0.584395	0.724522	0.996815	0.479299	0.417863	0.007962	0.242038	0.479299	0.759554	0.996815	0.390127
0.445783	0.337349	0.216867	0.353659	0.219512	0.134146	0.036145	0.240964	0.481928	0.698795	1	0.024096	0.228916	0.457831	0.759036	0.987952	0.012048	0.13253	0.590361	0.686747	0.951807	0.240964	0	0.759036	0	0.097561	0	0.012048	0.493976	0.759036	0.819277	1	0	0	0	0	0	0.048193	0.216867	0.421687	0.674699	0.975904	0.325301	0.463415	0.048193	0.253012	0.457831	0.650602	0.939759	0.361446
0.34492	0.262032	0.393048	0.168901	0.262735	0.22252	0.008021	0.205882	0.47861	0.745989	1	0.005348	0.256684	0.524064	0.735294	0.991979	0.002674	0.26738	0.516043	0.740642	0.994652	0.275401	0.181818	0.542781	0.058981	0.053619	0.021448	0.002674	0.259358	0.435829	0.794118	1	0.058824	0.360963	0.516043	0.820856	0.935829	0.010695	0.165775	0.5	0.673797	0.991979	0.502674	0.434316	0.010695	0.237968	0.441176	0.71123	0.989305	0.197861
0.315789	0.368421	0.315789	0.166667	0.204545	0.212121	0.015038	0.225564	0.503759	0.789474	1	0.022556	0.285714	0.473684	0.729323	0.992481	0.007519	0.210526	0.511278	0.699248	0.984962	0.368421	0.240602	0.390977	0.068182	0.083333	0.007576	0.007519	0.270677	0.451128	0.87218	1	0.052632	0.293233	0.390977	0.488722	0.714286	0.142857	0.233083	0.601504	0.789474	0.962406	0.413534	0.393939	0.030075	0.18797	0.413534	0.616541	0.857143	0.360902
0.350711	0.364929	0.28436	0.238095	0.261905	0.171429	0.009479	0.21327	0.445498	0.687204	1	0.037915	0.28436	0.56872	0.862559	0.985782	0.004739	0.251185	0.450237	0.677725	0.85782	0.445498	0.379147	0.175355	0.119048	0.071429	0.004762	0.004739	0.274882	0.601896	0.815166	1	0.014218	0.293839	0.436019	0.611374	0.853081	0.080569	0.218009	0.260664	0.748815	0.990521	0.421801	0.447619	0.018957	0.246445	0.436019	0.672986	0.943128	0.398104
0.316764	0.481481	0.201754	0.277073	0.12	0.187317	0.001949	0.268031	0.560429	0.760234	1	0.002924	0.199805	0.445419	0.736842	0.998051	0.000975	0.334308	0.538012	0.755361	0.999025	0.658869	0.103314	0.237817	0.046829	0.056585	0.001951	0.000975	0.229045	0.466862	0.74269	1	0.004873	0.34308	0.598441	0.737817	0.968811	0.013645	0.2846	0.536062	0.750487	0.993177	0.447368	0.308293	0.004873	0.277778	0.469786	0.71345	0.995127	0.448343
0.333938	0.402904	0.263158	0.250909	0.158182	0.229091	0.012704	0.212341	0.508167	0.818512	1	0.00363	0.205082	0.442831	0.716878	0.99637	0.001815	0.321234	0.513612	0.718693	0.970962	0.502722	0.136116	0.361162	0.049091	0.074545	0.005455	0.001815	0.127042	0.366606	0.744102	1	0.168784	0.411978	0.560799	0.720508	0.811252	0.110708	0.346642	0.540835	0.814882	0.958258	0.473684	0.330909	0.005445	0.297641	0.470054	0.693285	0.990926	0.444646
0.37276	0.286738	0.340502	0.21223	0.284173	0.194245	0.007168	0.232975	0.523297	0.781362	0.996416	0.010753	0.240143	0.433692	0.65233	1	0.003584	0.275986	0.526882	0.763441	0.989247	0.397849	0.172043	0.430108	0.05036	0.086331	0	0.003584	0.146953	0.430108	0.702509	1	0.222222	0.383513	0.458781	0.659498	0.749104	0.028674	0.272401	0.544803	0.83871	0.989247	0.55914	0.438849	0.010753	0.25448	0.480287	0.673835	0.989247	0.322581
0.488318	0.285047	0.226636	0.29274	0.234192	0.100703	0.007009	0.259346	0.495327	0.754673	1	0.004673	0.273364	0.586449	0.829439	0.995327	0.002336	0.168224	0.364486	0.61215	0.992991	0.481308	0.175234	0.343458	0.079625	0.065574	0.004684	0.002336	0.254673	0.602804	0.859813	1	0.109813	0.320093	0.544393	0.703271	0.904206	0.023364	0.154206	0.448598	0.586449	0.978972	0.315421	0.346604	0.023364	0.158879	0.36215	0.614486	0.939252	0.352804
0.30102	0.428571	0.270408	0.253197	0.173913	0.237852	0.007653	0.227041	0.47449	0.721939	1	0.015306	0.288265	0.556122	0.811224	0.997449	0.002551	0.183673	0.446429	0.69898	0.992347	0.558673	0.214286	0.227041	0.081841	0.051151	0	0.002551	0.265306	0.561224	0.859694	1	0.02551	0.178571	0.392857	0.576531	0.742347	0.056122	0.216837	0.433673	0.691327	0.795918	0.510204	0.286445	0.022959	0.295918	0.594388	0.829082	0.987245	0.428571
0.431767	0.369128	0.199105	0.320628	0.183857	0.14574	0.008949	0.272931	0.512304	0.774049	1	0.004474	0.187919	0.42953	0.686801	0.975391	0.002237	0.304251	0.624161	0.753915	0.995526	0.753915	0.053691	0.192394	0.038117	0.05157	0.002242	0.002237	0.234899	0.427293	0.720358	1	0.053691	0.178971	0.199105	0.691275	0.832215	0.114094	0.608501	0.702461	0.760626	0.988814	0.373602	0.367713	0.013423	0.425056	0.58613	0.751678	0.995526	0.353468
0.351351	0.316953	0.331695	0.184729	0.268473	0.23399	0.004914	0.206388	0.481572	0.788698	0.995086	0.007371	0.289926	0.498771	0.724816	0.980344	0.002457	0.2457	0.501229	0.746929	1	0.339066	0.223587	0.437346	0.078818	0.083744	0	0.002457	0.277641	0.459459	0.756757	1	0.012285	0.181818	0.375921	0.513514	0.95086	0.04914	0.299754	0.609337	0.798526	0.997543	0.592138	0.438424	0.007371	0.287469	0.4914	0.722359	0.997543	0.316953
0.310345	0.431034	0.258621	0.306358	0.17341	0.179191	0.028736	0.229885	0.54023	0.735632	1	0.011494	0.183908	0.511494	0.747126	0.977011	0.005747	0.247126	0.454023	0.724138	0.994253	0.591954	0.172414	0.235632	0.069364	0.080925	0	0.005747	0.16092	0.436782	0.701149	1	0.218391	0.252874	0.5	0.574713	0.95977	0.137931	0.321839	0.678161	0.752874	0.91954	0.436782	0.393064	0.017241	0.298851	0.477011	0.706897	0.965517	0.413793
0.347619	0.37619	0.27619	0.244019	0.22488	0.191388	0.014286	0.261905	0.471429	0.752381	0.995238	0.009524	0.209524	0.485714	0.714286	1	0.004762	0.3	0.5	0.747619	0.966667	0.5	0.147619	0.352381	0.057416	0.076555	0.028708	0.004762	0.157143	0.519048	0.761905	1	0.247619	0.309524	0.628571	0.933333	0.980952	0.038095	0.338095	0.442857	0.72381	0.938095	0.47619	0.421053	0.019048	0.338095	0.509524	0.728571	0.980952	0.366667
0.32526	0.404844	0.269896	0.253472	0.170139	0.21875	0.013841	0.245675	0.49827	0.799308	0.99308	0.00692	0.249135	0.515571	0.712803	0.99654	0.00346	0.231834	0.439446	0.723183	1	0.709343	0.155709	0.134948	0.090278	0.055556	0.006944	0.00346	0.33564	0.553633	0.740484	1	0.089965	0.217993	0.283737	0.854671	0.989619	0.017301	0.183391	0.311419	0.401384	0.979239	0.588235	0.319444	0.024221	0.342561	0.567474	0.726644	0.989619	0.370242
0.334615	0.388462	0.276923	0.258687	0.220077	0.216216	0.057692	0.346154	0.553846	0.773077	0.996154	0.007692	0.203846	0.419231	0.707692	1	0.003846	0.219231	0.5	0.75	0.988462	0.526923	0.246154	0.226923	0.100386	0.061776	0	0.003846	0.223077	0.369231	0.680769	1	0.015385	0.434615	0.6	0.834615	0.992308	0.042308	0.134615	0.534615	0.769231	0.930769	0.403846	0.362934	0.011538	0.188462	0.496154	0.780769	0.988462	0.396154
0.338742	0.35497	0.306288	0.227642	0.195122	0.215447	0.008114	0.269777	0.537525	0.770791	0.995943	0.010142	0.298174	0.525355	0.750507	0.997972	0.002028	0.156187	0.40568	0.713996	1	0.46856	0.125761	0.40568	0.050813	0.103659	0.006098	0.002028	0.25355	0.614604	0.8357	1	0.004057	0.085193	0.31643	0.490872	0.975659	0.05071	0.275862	0.496957	0.636917	0.914807	0.513185	0.406504	0.006085	0.206897	0.413793	0.616633	0.993915	0.389452
0.356269	0.351682	0.292049	0.222052	0.189893	0.212864	0.007645	0.321101	0.629969	0.847095	1	0.003058	0.212538	0.437309	0.678899	0.995413	0.001529	0.224771	0.443425	0.66208	0.996942	0.397554	0.134557	0.46789	0.052067	0.101072	0.006126	0.001529	0.215596	0.507645	0.764526	1	0.087156	0.255352	0.392966	0.544343	0.79052	0.025994	0.2737	0.551988	0.821101	0.990826	0.481651	0.367534	0.015291	0.203364	0.425076	0.616208	0.996942	0.368502
0.404	0.284	0.312	0.212851	0.261044	0.192771	0.012	0.244	0.444	0.748	0.988	0.008	0.252	0.592	0.776	1	0.004	0.228	0.464	0.696	0.98	0.484	0.208	0.308	0.072289	0.032129	0	0.004	0.264	0.708	0.876	1	0.04	0.232	0.412	0.628	0.828	0.112	0.184	0.476	0.552	0.692	0.516	0.401606	0.02	0.228	0.48	0.684	0.98	0.284
0.390977	0.315789	0.293233	0.265152	0.181818	0.219697	0.022556	0.24812	0.518797	0.75188	1	0.015038	0.210526	0.458647	0.721805	0.969925	0.007519	0.270677	0.473684	0.729323	0.924812	0.300752	0.360902	0.338346	0.045455	0.060606	0.015152	0.007519	0.105263	0.323308	0.609023	1	0.150376	0.654135	0.744361	0.849624	0.93985	0.06015	0.278195	0.390977	0.511278	0.631579	0.421053	0.439394	0.150376	0.308271	0.526316	0.736842	0.924812	0.323308
0.325	0.3875	0.2875	0.245283	0.169811	0.232704	0.01875	0.1875	0.4375	0.65	0.96875	0.0125	0.2625	0.48125	0.75625	0.99375	0.00625	0.26875	0.5375	0.78125	1	0.5125	0.375	0.1125	0.125786	0.037736	0	0.00625	0.2	0.3875	0.7375	1	0.09375	0.43125	0.55625	0.68125	0.9	0.01875	0.0375	0.06875	0.93125	0.9625	0.3875	0.477987	0.05	0.3125	0.50625	0.7375	0.98125	0.38125
0.391304	0.452899	0.155797	0.345455	0.138182	0.112727	0.014493	0.300725	0.532609	0.771739	1	0.025362	0.228261	0.518116	0.710145	0.996377	0.003623	0.130435	0.333333	0.706522	0.923913	0.717391	0.050725	0.231884	0.021818	0.058182	0	0.003623	0.246377	0.48913	0.666667	1	0.032609	0.039855	0.108696	0.315217	0.32971	0.130435	0.365942	0.728261	0.844203	0.92029	0.23913	0.370909	0.01087	0.221014	0.525362	0.778986	0.985507	0.463768
0.368564	0.317073	0.314363	0.222343	0.241866	0.204989	0.001626	0.268293	0.523035	0.736585	0.996206	0.003252	0.267751	0.507859	0.754472	0.999458	0.000542	0.211924	0.461247	0.755556	1	0.511111	0.102981	0.385908	0.045553	0.075922	0.003254	0.000542	0.333333	0.559892	0.762602	1	0.001084	0.124661	0.370732	0.539295	0.980488	0.007588	0.182114	0.463415	0.814092	0.995122	0.523035	0.367679	0.002168	0.239566	0.481843	0.755556	0.998374	0.345257
0.347826	0.365217	0.286957	0.307018	0.201754	0.210526	0.043478	0.217391	0.495652	0.747826	0.982609	0.017391	0.191304	0.469565	0.756522	1	0.008696	0.278261	0.504348	0.66087	0.991304	0.504348	0.234783	0.26087	0.096491	0.061404	0.008772	0.008696	0.121739	0.434783	0.773913	1	0.391304	0.6	0.66087	0.843478	0.947826	0.173913	0.226087	0.347826	0.521739	0.965217	0.330435	0.368421	0.130435	0.278261	0.530435	0.66087	0.965217	0.373913
0.369892	0.331183	0.298925	0.243534	0.226293	0.193966	0.008602	0.230108	0.492473	0.8	0.993548	0.006452	0.268817	0.505376	0.731183	1	0.002151	0.232258	0.47957	0.703226	0.948387	0.384946	0.083871	0.531183	0.036638	0.105603	0.002155	0.002151	0.221505	0.391398	0.780645	1	0.064516	0.176344	0.251613	0.313978	0.417204	0.006452	0.402151	0.591398	0.76129	0.948387	0.541935	0.362069	0.004301	0.260215	0.47957	0.703226	0.948387	0.344086
0.282369	0.370523	0.347107	0.209655	0.201379	0.262069	0.008264	0.279614	0.506887	0.772727	0.998623	0.002755	0.230028	0.487603	0.758953	0.997245	0.001377	0.23416	0.49449	0.719008	1	0.374656	0.11708	0.508264	0.046897	0.093793	0.002759	0.001377	0.260331	0.545455	0.790634	1	0.006887	0.085399	0.252066	0.581267	0.805785	0.0427	0.287879	0.493113	0.754821	0.993113	0.57438	0.342069	0.009642	0.230028	0.509642	0.736915	0.980716	0.402204
0.358779	0.305344	0.335878	0.223077	0.238462	0.246154	0.076336	0.335878	0.519084	0.778626	0.938931	0.022901	0.19084	0.412214	0.755725	1	0.007634	0.21374	0.442748	0.687023	0.992366	0.458015	0.137405	0.40458	0.046154	0.092308	0	0.007634	0.19084	0.351145	0.748092	1	0.259542	0.282443	0.381679	0.412214	0.694656	0.076336	0.465649	0.564885	0.78626	0.89313	0.419847	0.323077	0.053435	0.29771	0.503817	0.679389	0.954198	0.274809
0.431138	0.341317	0.227545	0.204819	0.174699	0.156627	0.011976	0.305389	0.443114	0.634731	1	0.017964	0.179641	0.556886	0.742515	0.964072	0.005988	0.137725	0.60479	0.808383	0.994012	0.586826	0.137725	0.275449	0.036145	0.060241	0	0.005988	0.179641	0.365269	0.532934	1	0.101796	0.125749	0.874251	0.958084	0.994012	0.257485	0.580838	0.652695	0.754491	0.826347	0.413174	0.289157	0.023952	0.197605	0.628743	0.802395	0.988024	0.323353
0.284615	0.369231	0.346154	0.209302	0.232558	0.255814	0.038462	0.276923	0.476923	0.715385	1	0.015385	0.238462	0.538462	0.792308	0.992308	0.007692	0.215385	0.461538	0.661538	0.969231	0.569231	0.369231	0.061538	0.131783	0.054264	0.007752	0.007692	0.361538	0.676923	0.838462	1	0.023077	0.138462	0.338462	0.6	0.807692	0.284615	0.292308	0.315385	0.430769	0.946154	0.423077	0.449612	0.023077	0.2	0.446154	0.676923	0.969231	0.361538
0.337004	0.328194	0.334802	0.205298	0.249448	0.161148	0.004405	0.222467	0.484581	0.753304	0.995595	0.011013	0.242291	0.486784	0.735683	0.977974	0.002203	0.277533	0.513216	0.757709	1	0.400881	0.185022	0.414097	0.066225	0.083885	0.004415	0.002203	0.26652	0.497797	0.746696	1	0.11674	0.273128	0.647577	0.770925	0.955947	0.017621	0.209251	0.451542	0.702643	0.997797	0.544053	0.401766	0.015419	0.277533	0.480176	0.711454	0.991189	0.348018
0.365546	0.323529	0.310924	0.227848	0.223629	0.244726	0.008403	0.210084	0.462185	0.773109	1	0.021008	0.260504	0.487395	0.747899	0.991597	0.004202	0.252101	0.508403	0.722689	0.987395	0.420168	0.168067	0.411765	0.075949	0.059072	0	0.004202	0.344538	0.554622	0.710084	1	0.205882	0.352941	0.453782	0.647059	0.739496	0.029412	0.12605	0.466387	0.815126	0.983193	0.470588	0.455696	0.029412	0.285714	0.512605	0.714286	0.966387	0.323529
0.289593	0.420814	0.289593	0.213636	0.159091	0.227273	0.022624	0.20362	0.542986	0.80543	0.995475	0.00905	0.208145	0.470588	0.687783	1	0.004525	0.303167	0.488688	0.764706	0.986425	0.647059	0.180995	0.171946	0.081818	0.054545	0.018182	0.004525	0.221719	0.538462	0.782805	1	0.167421	0.447964	0.651584	0.764706	0.941176	0.022624	0.117647	0.348416	0.402715	0.977376	0.533937	0.263636	0.099548	0.348416	0.547511	0.742081	0.972851	0.434389
0.380734	0.344037	0.275229	0.262069	0.209195	0.206897	0.009174	0.222477	0.461009	0.736239	1	0.004587	0.192661	0.506881	0.75	0.997706	0.002294	0.327982	0.534404	0.772936	0.993119	0.527523	0.126147	0.34633	0.045977	0.082759	0.004598	0.002294	0.149083	0.376147	0.731651	1	0.020642	0.43578	0.573394	0.71789	0.844037	0.133028	0.355505	0.534404	0.816514	0.965596	0.493119	0.349425	0.018349	0.355505	0.559633	0.756881	0.993119	0.341743
0.345997	0.324288	0.329715	0.230978	0.244565	0.221467	0.006784	0.230665	0.472185	0.721845	0.998643	0.002714	0.279512	0.529172	0.759837	1	0.001357	0.240163	0.49118	0.750339	0.997286	0.423338	0.162822	0.41384	0.065217	0.081522	0.002717	0.001357	0.240163	0.483039	0.735414	1	0.004071	0.189959	0.438263	0.616011	0.87517	0.017639	0.255088	0.56445	0.793758	0.967436	0.556309	0.388587	0.004071	0.283582	0.515604	0.729986	0.987788	0.34057
0.283978	0.447514	0.268508	0.21792	0.18031	0.220133	0.00884	0.232044	0.436464	0.674033	0.998895	0.003315	0.278453	0.59558	0.777901	0.996685	0.001105	0.227624	0.427624	0.687293	1	0.60663	0.124862	0.268508	0.063053	0.058628	0.003319	0.001105	0.303867	0.59116	0.776796	1	0.029834	0.19337	0.324862	0.470718	0.814365	0.00442	0.21326	0.38895	0.767956	0.956906	0.483978	0.435841	0.00442	0.296133	0.569061	0.775691	0.99116	0.443094
0.295652	0.42029	0.284058	0.209572	0.183466	0.211748	0.002174	0.206522	0.433333	0.672464	0.994203	0.001449	0.269565	0.595652	0.868116	1	0.000725	0.268116	0.471739	0.675362	0.991304	0.534783	0.12971	0.335507	0.052937	0.06599	0.003626	0.000725	0.242754	0.555797	0.86087	1	0.015217	0.299275	0.476087	0.562319	0.985507	0.002899	0.245652	0.464493	0.657971	0.826087	0.601449	0.31037	0.002899	0.324638	0.57971	0.845652	0.998551	0.418841
0.352617	0.311295	0.336088	0.205517	0.230345	0.216552	0.002755	0.239669	0.480716	0.731405	0.991736	0.006887	0.257576	0.517906	0.754821	0.997245	0.001377	0.241047	0.508264	0.761708	1	0.42562	0.23416	0.34022	0.084138	0.062069	0.004138	0.001377	0.241047	0.428375	0.712121	1	0.11157	0.230028	0.487603	0.898072	0.998623	0.008264	0.322314	0.578512	0.750689	0.885675	0.539945	0.377931	0.00551	0.289256	0.512397	0.758953	0.995868	0.327824
0.371324	0.341912	0.286765	0.317343	0.199262	0.225092	0.007353	0.202206	0.448529	0.764706	0.996324	0.011029	0.316176	0.573529	0.753676	1	0.003676	0.231618	0.452206	0.694853	0.981618	0.636029	0.117647	0.246324	0.055351	0.055351	0.00369	0.003676	0.1875	0.477941	0.764706	1	0.110294	0.4375	0.580882	0.731618	0.919118	0.136029	0.238971	0.481618	0.544118	0.911765	0.496324	0.383764	0.029412	0.268382	0.507353	0.705882	0.981618	0.360294
0.466501	0.305211	0.228288	0.281095	0.199005	0.146766	0.007444	0.2134	0.454094	0.751861	1	0.004963	0.260546	0.545906	0.82134	0.985112	0.002481	0.317618	0.496278	0.669975	0.997519	0.511166	0.233251	0.255583	0.089552	0.064677	0	0.002481	0.26799	0.538462	0.784119	1	0.151365	0.377171	0.468983	0.702233	0.997519	0.007444	0.131514	0.48139	0.734491	0.980149	0.37469	0.363184	0.012407	0.337469	0.513648	0.744417	0.997519	0.369727
0.422018	0.357798	0.220183	0.285714	0.142857	0.193548	0.041284	0.362385	0.619266	0.802752	1	0.009174	0.183486	0.481651	0.752294	0.995413	0.004587	0.169725	0.325688	0.550459	0.990826	0.555046	0.197248	0.247706	0.078341	0.059908	0.004608	0.004587	0.270642	0.522936	0.711009	1	0.050459	0.188073	0.348624	0.536697	0.963303	0.105505	0.288991	0.619266	0.779817	0.986239	0.311927	0.359447	0.03211	0.192661	0.348624	0.674312	0.963303	0.385321
0.381275	0.367707	0.251018	0.258152	0.177989	0.157609	0.006784	0.213026	0.518318	0.791045	1	0.004071	0.229308	0.458616	0.709634	0.998643	0.001357	0.299864	0.523745	0.724559	0.997286	0.400271	0.024423	0.575305	0.009511	0.099185	0.001359	0.001357	0.105834	0.459973	0.815468	1	0.056988	0.061058	0.876526	0.881954	0.924016	0.157395	0.327001	0.506106	0.690638	0.993216	0.431479	0.347826	0.016282	0.332429	0.503392	0.693351	0.994573	0.393487
0.372007	0.3407	0.287293	0.236866	0.213825	0.2	0.002762	0.210866	0.462247	0.744936	1	0.001842	0.237569	0.48895	0.731123	0.999079	0.000921	0.334254	0.550645	0.775322	0.994475	0.441989	0.093002	0.465009	0.042396	0.086636	0.001843	0.000921	0.190608	0.394107	0.672192	1	0.005525	0.289134	0.384899	0.569061	0.95488	0.004604	0.361878	0.609576	0.78453	0.996317	0.476059	0.337327	0.005525	0.330571	0.541436	0.757827	0.994475	0.344383
0.389423	0.331731	0.278846	0.193237	0.231884	0.188406	0.009615	0.216346	0.403846	0.697115	0.995192	0.024038	0.192308	0.538462	0.788462	1	0.004808	0.3125	0.509615	0.735577	0.990385	0.490385	0.158654	0.350962	0.067633	0.10628	0.028986	0.004808	0.153846	0.524038	0.75	1	0.221154	0.293269	0.615385	0.740385	0.980769	0.043269	0.326923	0.427885	0.725962	0.947115	0.485577	0.415459	0.024038	0.341346	0.504808	0.730769	0.980769	0.307692
0.455128	0.294872	0.25	0.303226	0.206452	0.122581	0.044872	0.301282	0.564103	0.782051	1	0.032051	0.179487	0.532051	0.717949	0.974359	0.00641	0.134615	0.403846	0.557692	0.935897	0.423077	0.166667	0.410256	0.077419	0.103226	0.012903	0.00641	0.352564	0.698718	0.871795	1	0.012821	0.237179	0.314103	0.512821	0.935897	0.044872	0.141026	0.423077	0.641026	0.839744	0.301282	0.309677	0.012821	0.179487	0.339744	0.480769	0.897436	0.269231
0.283537	0.60061	0.115854	0.30687	0.083969	0.122137	0.007622	0.329268	0.5625	0.786585	0.996951	0.003049	0.190549	0.39939	0.722561	1	0.001524	0.527439	0.632622	0.806402	0.978659	0.862805	0.04878	0.088415	0.025954	0.025954	0.001527	0.001524	0.269817	0.48628	0.772866	1	0.07622	0.551829	0.608232	0.635671	0.817073	0.012195	0.088415	0.170732	0.640244	0.990854	0.527439	0.332824	0.009146	0.344512	0.612805	0.818598	0.978659	0.58689
0.485327	0.24605	0.268623	0.210407	0.223982	0.153846	0.004515	0.27991	0.474041	0.659142	0.997743	0.018059	0.227991	0.553047	0.812641	1	0.002257	0.187359	0.514673	0.808126	0.988713	0.638826	0.158014	0.20316	0.074661	0.061086	0.002262	0.002257	0.295711	0.476298	0.668172	1	0.013544	0.137698	0.512415	0.873589	0.977427	0.065463	0.17833	0.670429	0.767494	0.943567	0.525959	0.38009	0.011287	0.320542	0.512415	0.690745	0.975169	0.21219
0.466019	0.262136	0.271845	0.284314	0.22549	0.137255	0.029126	0.31068	0.582524	0.786408	0.990291	0.019417	0.184466	0.339806	0.572816	1	0.009709	0.174757	0.495146	0.76699	0.941748	0.61165	0.097087	0.291262	0.098039	0.098039	0	0.009709	0.145631	0.359223	0.650485	1	0.15534	0.165049	0.582524	0.601942	0.76699	0.184466	0.466019	0.669903	0.883495	0.970874	0.378641	0.411765	0.087379	0.203883	0.504854	0.747573	0.970874	0.300971
0.508197	0.35363	0.138173	0.394366	0.133803	0.079812	0.007026	0.306792	0.620609	0.786885	1	0.004684	0.208431	0.454333	0.716628	0.995316	0.002342	0.114754	0.327869	0.477752	0.997658	0.716628	0.067916	0.215457	0.042254	0.046948	0	0.002342	0.320843	0.613583	0.800937	1	0.323185	0.384075	0.423888	0.477752	0.964871	0.032787	0.105386	0.250585	0.370023	0.995316	0.248244	0.267606	0.018735	0.107728	0.330211	0.447307	0.98829	0.377049
0.374126	0.297203	0.328671	0.225919	0.255692	0.211909	0.006993	0.277972	0.527972	0.774476	1	0.003497	0.236014	0.508741	0.748252	0.996503	0.001748	0.237762	0.456294	0.694056	0.991259	0.40035	0.386364	0.213287	0.113835	0.064799	0.019264	0.001748	0.26049	0.533217	0.744755	1	0.020979	0.25	0.479021	0.70979	0.935315	0.034965	0.199301	0.435315	0.802448	0.994755	0.452797	0.409807	0.005245	0.26049	0.5	0.723776	0.991259	0.335664
0.522727	0.25	0.227273	0.298851	0.264368	0.114943	0.034091	0.193182	0.409091	0.715909	1	0.022727	0.340909	0.625	0.829545	0.965909	0.011364	0.215909	0.465909	0.681818	0.863636	0.454545	0.090909	0.454545	0.057471	0.08046	0.011494	0.011364	0.25	0.465909	0.886364	1	0.306818	0.681818	0.829545	0.852273	0.875	0.090909	0.193182	0.443182	0.613636	0.784091	0.295455	0.390805	0.045455	0.363636	0.579545	0.693182	0.863636	0.261364
0.321321	0.357357	0.321321	0.192771	0.192771	0.262048	0.021021	0.234234	0.432432	0.747748	0.984985	0.006006	0.231231	0.522523	0.78979	1	0.003003	0.255255	0.498498	0.693694	0.993994	0.414414	0.048048	0.537538	0.018072	0.108434	0.006024	0.003003	0.189189	0.525526	0.798799	1	0.537538	0.774775	0.813814	0.825826	0.843844	0.006006	0.264264	0.462462	0.645646	0.984985	0.438438	0.403614	0.012012	0.264264	0.495495	0.696697	0.978979	0.372372
0.327273	0.409091	0.263636	0.302752	0.155963	0.211009	0.036364	0.209091	0.472727	0.690909	0.990909	0.018182	0.236364	0.518182	0.718182	0.981818	0.009091	0.245455	0.454545	0.763636	1	0.490909	0.418182	0.090909	0.110092	0.036697	0	0.009091	0.218182	0.527273	0.736364	1	0.036364	0.127273	0.463636	0.690909	0.954545	0.327273	0.336364	0.363636	0.381818	0.872727	0.518182	0.256881	0.036364	0.236364	0.463636	0.745455	0.972727	0.345455
0.43662	0.309859	0.253521	0.185714	0.257143	0.185714	0.028169	0.28169	0.492958	0.859155	1	0.084507	0.15493	0.535211	0.647887	0.915493	0.014085	0.197183	0.450704	0.56338	0.901408	0.478873	0.338028	0.183099	0.142857	0.028571	0	0.014085	0.112676	0.422535	0.633803	1	0.140845	0.211268	0.352113	0.492958	0.71831	0.788732	0.816901	0.859155	0.901408	0.957746	0.408451	0.428571	0.070423	0.239437	0.507042	0.619718	0.901408	0.338028
0.349921	0.349398	0.300681	0.237421	0.208071	0.21174	0.002095	0.193819	0.466213	0.751179	0.998428	0.003667	0.282347	0.521739	0.756417	1	0.000524	0.262441	0.511786	0.739654	0.999476	0.487166	0.110005	0.402829	0.045597	0.078092	0.005765	0.000524	0.194343	0.500786	0.732844	1	0.021477	0.243059	0.515977	0.638554	0.97957	0.008381	0.283918	0.489785	0.798848	0.997905	0.514929	0.368973	0.005238	0.276585	0.524882	0.728654	0.999476	0.374018
0.35625	0.35	0.29375	0.310345	0.241379	0.181818	0.015625	0.23125	0.521875	0.775	0.9875	0.00625	0.303125	0.5875	0.81875	1	0.003125	0.19375	0.403125	0.6	0.95	0.59375	0.228125	0.178125	0.056426	0.056426	0.00627	0.003125	0.321875	0.646875	0.834375	1	0.009375	0.265625	0.353125	0.490625	0.578125	0.021875	0.121875	0.371875	0.68125	0.878125	0.465625	0.382445	0.009375	0.275	0.4375	0.60625	0.965625	0.403125
0.291005	0.407407	0.301587	0.251989	0.180371	0.246684	0.021164	0.261905	0.513228	0.730159	1	0.005291	0.195767	0.462963	0.756614	0.992063	0.002646	0.280423	0.521164	0.732804	0.997354	0.410053	0.156085	0.433862	0.066313	0.082228	0.007958	0.002646	0.190476	0.399471	0.777778	1	0.121693	0.283069	0.420635	0.558201	0.796296	0.005291	0.320106	0.600529	0.759259	0.994709	0.595238	0.366048	0.007937	0.301587	0.560847	0.759259	0.997354	0.412698
0.368864	0.417952	0.213184	0.280899	0.151685	0.161517	0.002805	0.235624	0.429173	0.667602	0.998597	0.004208	0.290323	0.608696	0.810659	1	0.001403	0.231417	0.464236	0.681627	0.997195	0.706872	0.145863	0.147265	0.075843	0.047753	0	0.001403	0.308555	0.605891	0.786816	1	0.00561	0.224404	0.352034	0.546985	0.995792	0.02805	0.15568	0.269285	0.509116	0.848527	0.45021	0.33427	0.007013	0.339411	0.628331	0.812062	0.99439	0.415147
0.315789	0.361842	0.322368	0.271523	0.205298	0.18543	0.026316	0.230263	0.493421	0.730263	0.993421	0.013158	0.263158	0.519737	0.822368	1	0.006579	0.236842	0.453947	0.684211	0.927632	0.361842	0.177632	0.460526	0.07947	0.07947	0	0.006579	0.184211	0.348684	0.875	1	0.052632	0.085526	0.164474	0.230263	0.940789	0.269737	0.453947	0.598684	0.75	0.868421	0.532895	0.437086	0.052632	0.269737	0.447368	0.690789	0.934211	0.368421
0.380734	0.330275	0.288991	0.21659	0.221198	0.24424	0.022936	0.238532	0.454128	0.784404	1	0.009174	0.229358	0.545872	0.798165	0.986239	0.004587	0.247706	0.440367	0.665138	0.995413	0.481651	0.357798	0.16055	0.124424	0.050691	0.004608	0.004587	0.307339	0.633028	0.834862	1	0.009174	0.275229	0.417431	0.591743	0.926606	0.068807	0.100917	0.238532	0.715596	0.894495	0.417431	0.460829	0.018349	0.233945	0.426606	0.655963	0.96789	0.376147
0.329412	0.4	0.270588	0.22619	0.22619	0.22619	0.035294	0.294118	0.517647	0.682353	0.988235	0.023529	0.188235	0.435294	0.776471	0.976471	0.011765	0.164706	0.458824	0.670588	1	0.529412	0.258824	0.211765	0.142857	0.047619	0	0.011765	0.2	0.517647	0.788235	1	0.070588	0.552941	0.647059	0.764706	0.941176	0.141176	0.235294	0.294118	0.341176	0.4	0.447059	0.52381	0.058824	0.270588	0.6	0.776471	0.952941	0.329412
0.378446	0.323308	0.298246	0.228356	0.209536	0.200753	0.003759	0.205514	0.510025	0.775689	1	0.002506	0.243108	0.491228	0.73183	0.997494	0.001253	0.266917	0.488722	0.734336	0.998747	0.570175	0.139098	0.290727	0.058971	0.091593	0.003764	0.001253	0.263158	0.551378	0.750627	1	0.098997	0.333333	0.535088	0.738095	0.907268	0.011278	0.121554	0.373434	0.759398	0.988722	0.462406	0.311167	0.015038	0.23183	0.432331	0.740602	0.989975	0.35213
0.353884	0.31566	0.330456	0.204938	0.264198	0.218519	0.007398	0.254007	0.504316	0.745993	0.998767	0.004932	0.251541	0.488286	0.749692	1	0.001233	0.235512	0.495684	0.750925	0.997534	0.471023	0.236745	0.292232	0.101235	0.054321	0.002469	0.001233	0.210851	0.487053	0.745993	1	0.039457	0.207152	0.420469	0.755857	0.997534	0.006165	0.323058	0.54254	0.706535	0.988903	0.564735	0.414815	0.003699	0.252774	0.475956	0.729963	0.997534	0.325524
0.428571	0.404762	0.166667	0.361446	0.180723	0.120482	0.02381	0.345238	0.630952	0.845238	1	0.035714	0.22619	0.416667	0.642857	0.97619	0.011905	0.142857	0.333333	0.607143	0.797619	0.630952	0.261905	0.107143	0.120482	0.024096	0	0.011905	0.22619	0.511905	0.833333	1	0.130952	0.178571	0.297619	0.428571	0.619048	0.678571	0.690476	0.714286	0.738095	0.77381	0.333333	0.361446	0.059524	0.261905	0.452381	0.547619	0.77381	0.464286
0.320513	0.316239	0.363248	0.175966	0.23176	0.253219	0.008547	0.217949	0.482906	0.794872	1	0.012821	0.303419	0.517094	0.74359	0.995726	0.004274	0.239316	0.474359	0.692308	0.987179	0.504274	0.367521	0.128205	0.154506	0.060086	0.008584	0.004274	0.235043	0.57265	0.773504	1	0.021368	0.200855	0.474359	0.606838	0.965812	0.042735	0.363248	0.397436	0.803419	0.918803	0.538462	0.386266	0.012821	0.239316	0.5	0.717949	0.982906	0.337607
0.455172	0.282759	0.262069	0.236111	0.243056	0.194444	0.02069	0.296552	0.641379	0.834483	1	0.013793	0.241379	0.4	0.593103	0.924138	0.006897	0.172414	0.386207	0.586207	0.965517	0.475862	0.282759	0.241379	0.097222	0.083333	0	0.006897	0.241379	0.510345	0.751724	1	0.144828	0.227586	0.365517	0.434483	0.772414	0.075862	0.606897	0.668966	0.889655	0.972414	0.317241	0.375	0.034483	0.227586	0.386207	0.551724	0.965517	0.296552
0.338816	0.388158	0.273026	0.343234	0.171617	0.191419	0.013158	0.190789	0.427632	0.75	0.993421	0.006579	0.325658	0.572368	0.805921	0.996711	0.003289	0.213816	0.4375	0.684211	1	0.641447	0.296053	0.0625	0.132013	0.039604	0	0.003289	0.240132	0.539474	0.802632	1	0.009868	0.266447	0.398026	0.628289	0.980263	0.069079	0.078947	0.161184	0.819079	0.842105	0.506579	0.330033	0.009868	0.328947	0.532895	0.710526	0.973684	0.358553
0.33218	0.361592	0.306228	0.225974	0.220779	0.228571	0.00173	0.237024	0.502595	0.725779	0.99827	0.00519	0.262976	0.513841	0.767301	1	0.000865	0.242215	0.474913	0.738754	0.997405	0.487024	0.190311	0.322664	0.082251	0.05974	0.006061	0.000865	0.224913	0.515571	0.764706	1	0.00519	0.172145	0.403114	0.677336	0.965398	0.07526	0.33391	0.555363	0.732699	0.968858	0.544118	0.391342	0.002595	0.24654	0.511246	0.758651	0.995675	0.349481
0.427184	0.271845	0.300971	0.205882	0.245098	0.127451	0.058252	0.281553	0.495146	0.737864	0.970874	0.019417	0.252427	0.553398	0.796117	0.92233	0.009709	0.194175	0.38835	0.699029	1	0.407767	0.592233	0	0.196078	0	0	0.009709	0.281553	0.543689	0.786408	1	0.019417	0.203883	0.407767	0.699029	0.990291	0	0	0	0	0	0.38835	0.509804	0.019417	0.213592	0.475728	0.708738	0.980583	0.242718
0.404632	0.257493	0.337875	0.204638	0.270123	0.169168	0.002725	0.27248	0.543597	0.769755	0.99455	0.010899	0.192098	0.440054	0.69346	0.997275	0.001362	0.257493	0.50545	0.735695	1	0.43188	0.179837	0.388283	0.087312	0.065484	0.002729	0.001362	0.280654	0.549046	0.803815	1	0.00545	0.179837	0.450954	0.867847	0.998638	0.027248	0.26158	0.483651	0.610354	0.948229	0.536785	0.392906	0.006812	0.265668	0.480926	0.711172	0.995913	0.280654
0.394937	0.263291	0.341772	0.19797	0.291878	0.208122	0.005063	0.227848	0.475949	0.764557	1	0.012658	0.298734	0.577215	0.75443	0.989873	0.002532	0.225316	0.470886	0.726582	0.994937	0.321519	0.270886	0.407595	0.083756	0.068528	0.002538	0.002532	0.227848	0.546835	0.751899	1	0.106329	0.35443	0.473418	0.610127	0.918987	0.005063	0.255696	0.524051	0.855696	0.994937	0.493671	0.390863	0.010127	0.286076	0.526582	0.729114	0.994937	0.278481
0.35443	0.386076	0.259494	0.299363	0.197452	0.203822	0.025316	0.183544	0.525316	0.746835	0.993671	0.056962	0.234177	0.405063	0.727848	1	0.006329	0.303797	0.531646	0.721519	0.93038	0.575949	0.189873	0.234177	0.076433	0.038217	0.012739	0.006329	0.14557	0.322785	0.468354	1	0.28481	0.481013	0.702532	0.778481	0.936709	0.031646	0.537975	0.594937	0.848101	0.974684	0.481013	0.343949	0.101266	0.310127	0.487342	0.71519	0.955696	0.360759
0.298343	0.439227	0.262431	0.246537	0.166205	0.213296	0.008287	0.298343	0.533149	0.803867	1	0.005525	0.207182	0.455801	0.743094	0.997238	0.002762	0.273481	0.5	0.720994	0.991713	0.502762	0.11326	0.383978	0.066482	0.121884	0	0.002762	0.212707	0.436464	0.726519	1	0.013812	0.171271	0.417127	0.571823	0.690608	0.066298	0.345304	0.599448	0.823204	0.991713	0.480663	0.415512	0.01105	0.245856	0.447514	0.68232	0.991713	0.417127
0.306261	0.423012	0.270728	0.250847	0.169492	0.186441	0.01692	0.203046	0.465313	0.736041	0.984772	0.003384	0.189509	0.482234	0.717428	0.998308	0.001692	0.341794	0.585448	0.780034	1	0.649746	0.189509	0.160745	0.067797	0.030508	0	0.001692	0.192893	0.519459	0.747885	1	0.05753	0.329949	0.489002	0.766497	0.99154	0.023689	0.287648	0.453469	0.741117	0.956007	0.467005	0.376271	0.023689	0.291032	0.519459	0.705584	0.994924	0.43824
0.477477	0.189189	0.333333	0.2	0.327273	0.127273	0.018018	0.279279	0.54955	0.783784	0.981982	0.027027	0.18018	0.333333	0.45045	0.972973	0.009009	0.252252	0.504505	0.711712	1	0.315315	0.198198	0.486486	0.072727	0.109091	0	0.009009	0.207207	0.387387	0.657658	1	0.162162	0.225225	0.279279	0.675676	0.72973	0.054054	0.414414	0.558559	0.810811	0.963964	0.477477	0.381818	0.036036	0.342342	0.495495	0.702703	0.972973	0.18018
0.347911	0.330418	0.321672	0.218872	0.216926	0.236381	0.001944	0.237123	0.458698	0.718173	0.996113	0.007775	0.242954	0.50826	0.750243	0.999028	0.000972	0.262391	0.52964	0.773567	1	0.471331	0.200194	0.328474	0.070039	0.064202	0.007782	0.000972	0.272109	0.456754	0.746356	1	0.004859	0.283771	0.489796	0.742468	0.979592	0.015549	0.195335	0.601555	0.783285	0.897959	0.535471	0.340467	0.002915	0.250729	0.52964	0.762877	0.998056	0.360544
0.403846	0.25641	0.339744	0.167742	0.258065	0.180645	0.019231	0.25641	0.551282	0.788462	0.99359	0.012821	0.185897	0.455128	0.74359	0.974359	0.00641	0.24359	0.423077	0.647436	1	0.333333	0.089744	0.576923	0.03871	0.090323	0	0.00641	0.083333	0.365385	0.717949	1	0.461538	0.474359	0.5	0.538462	0.576923	0.134615	0.288462	0.615385	0.788462	0.974359	0.455128	0.451613	0.044872	0.275641	0.544872	0.75	0.987179	0.217949
0.39599	0.397243	0.206767	0.331242	0.159348	0.16813	0.005013	0.256892	0.52381	0.799499	1	0.002506	0.276942	0.467419	0.734336	0.996241	0.001253	0.179198	0.484962	0.685464	0.997494	0.714286	0.070175	0.215539	0.035132	0.067754	0	0.001253	0.239348	0.457393	0.695489	1	0.070175	0.358396	0.754386	0.883459	0.938596	0.005013	0.186717	0.552632	0.834586	0.997494	0.327068	0.351317	0.003759	0.229323	0.541353	0.775689	0.997494	0.442356
0.30465	0.367106	0.328244	0.221528	0.210417	0.239583	0.004164	0.278279	0.51839	0.740458	0.99653	0.001388	0.235947	0.496183	0.745316	0.999306	0.000694	0.240805	0.477446	0.754337	1	0.528105	0.376128	0.095767	0.117361	0.034028	0.004861	0.000694	0.258848	0.509368	0.725191	1	0.002082	0.226232	0.475364	0.754337	0.936155	0.00347	0.279667	0.528105	0.957668	0.998612	0.598196	0.313889	0.002082	0.240805	0.490632	0.761971	0.997918	0.392783
0.393777	0.378755	0.227468	0.276047	0.167562	0.166488	0.002146	0.22103	0.453863	0.759657	1	0.006438	0.265021	0.498927	0.762876	0.995708	0.001073	0.362661	0.531116	0.712446	0.993562	0.533262	0.100858	0.36588	0.038668	0.079484	0.004296	0.001073	0.201717	0.378755	0.727468	1	0.045064	0.403433	0.555794	0.684549	0.767167	0.01073	0.374464	0.567597	0.804721	0.966738	0.407725	0.322234	0.022532	0.370172	0.519313	0.712446	0.993562	0.4603
0.369034	0.441211	0.189756	0.257576	0.160839	0.131702	0.002328	0.202561	0.474971	0.696158	1	0.022119	0.291036	0.596042	0.85099	0.998836	0.001164	0.257276	0.423749	0.569267	0.973225	0.683353	0.126892	0.189756	0.052448	0.054779	0.003497	0.001164	0.252619	0.54482	0.827707	1	0.005821	0.301513	0.383003	0.445867	0.677532	0.004657	0.182771	0.537835	0.625146	0.963912	0.427241	0.328671	0.003492	0.307334	0.493597	0.718277	0.995343	0.434226
0.363333	0.325	0.311667	0.198664	0.237062	0.215359	0.005	0.233333	0.5	0.793333	1	0.013333	0.291667	0.51	0.771667	0.998333	0.001667	0.23	0.461667	0.675	0.996667	0.506667	0.143333	0.35	0.0601	0.106845	0.006678	0.001667	0.286667	0.53	0.775	1	0.048333	0.173333	0.578333	0.728333	0.945	0.006667	0.233333	0.393333	0.651667	0.996667	0.488333	0.404007	0.01	0.236667	0.515	0.725	0.995	0.326667
0.294872	0.394872	0.310256	0.254499	0.161954	0.290488	0.015385	0.241026	0.515385	0.751282	0.984615	0.005128	0.230769	0.461538	0.717949	0.992308	0.002564	0.274359	0.525641	0.748718	1	0.458974	0.079487	0.461538	0.046272	0.097686	0	0.002564	0.215385	0.45641	0.746154	1	0.153846	0.528205	0.825641	0.869231	0.997436	0.007692	0.264103	0.476923	0.710256	0.951282	0.466667	0.421594	0.007692	0.3	0.541026	0.753846	0.994872	0.369231
0.393162	0.290598	0.316239	0.266094	0.206009	0.214592	0.008547	0.183761	0.508547	0.769231	0.991453	0.038462	0.290598	0.491453	0.75641	0.995726	0.004274	0.239316	0.495726	0.705128	1	0.299145	0.102564	0.598291	0.038627	0.11588	0.004292	0.004274	0.149573	0.423077	0.75641	1	0.111111	0.773504	0.816239	0.84188	0.876068	0.017094	0.25641	0.474359	0.632479	0.982906	0.504274	0.351931	0.017094	0.222222	0.42735	0.632479	0.965812	0.269231
0.35284	0.337349	0.309811	0.237931	0.203448	0.218966	0.008606	0.32358	0.537005	0.753873	0.998279	0.006885	0.199656	0.500861	0.777969	1	0.001721	0.239243	0.432014	0.703959	0.996558	0.447504	0.170396	0.3821	0.067241	0.081034	0.005172	0.001721	0.173838	0.435456	0.784854	1	0.012048	0.211704	0.493976	0.738382	0.907057	0.089501	0.313253	0.526678	0.714286	0.958692	0.564544	0.324138	0.005164	0.246127	0.487091	0.707401	0.958692	0.380379
0.416321	0.35408	0.229599	0.288089	0.16482	0.160665	0.004149	0.300138	0.634855	0.807746	1	0.002766	0.271093	0.504841	0.767635	0.998617	0.001383	0.164592	0.334716	0.507607	0.917012	0.550484	0.230982	0.218534	0.087258	0.054017	0.006925	0.001383	0.305671	0.608575	0.771784	1	0.006916	0.142462	0.297372	0.475795	0.781466	0.062241	0.405256	0.626556	0.816044	0.97787	0.385892	0.33518	0.006916	0.193638	0.355463	0.539419	0.917012	0.39834
0.35274	0.344178	0.303082	0.272727	0.221269	0.185249	0.003425	0.217466	0.479452	0.743151	0.993151	0.005137	0.191781	0.453767	0.707192	1	0.001712	0.325342	0.535959	0.773973	0.998288	0.530822	0.150685	0.318493	0.060034	0.073756	0.005146	0.001712	0.133562	0.318493	0.667808	1	0.008562	0.481164	0.631849	0.828767	0.962329	0.212329	0.412671	0.571918	0.77911	0.989726	0.496575	0.367067	0.005137	0.32363	0.501712	0.743151	0.994863	0.34589
0.352181	0.318255	0.329564	0.223301	0.221683	0.197411	0.008078	0.232633	0.516963	0.77706	1	0.006462	0.197092	0.439418	0.736672	0.996769	0.001616	0.311793	0.53958	0.731826	0.983845	0.49273	0.163166	0.344103	0.063107	0.079288	0.004854	0.001616	0.159935	0.336026	0.647819	1	0.009693	0.308562	0.568659	0.728595	0.886914	0.077544	0.415186	0.599354	0.817447	0.995153	0.508885	0.355987	0.009693	0.345719	0.523425	0.731826	0.988691	0.360258
0.378571	0.360714	0.260714	0.25448	0.175627	0.215054	0.014286	0.307143	0.646429	0.825	0.992857	0.010714	0.192857	0.428571	0.625	1	0.003571	0.25	0.460714	0.725	0.989286	0.407143	0.128571	0.464286	0.046595	0.075269	0.003584	0.003571	0.189286	0.375	0.589286	1	0.082143	0.214286	0.314286	0.439286	0.739286	0.010714	0.464286	0.646429	0.860714	0.978571	0.364286	0.336918	0.028571	0.221429	0.428571	0.639286	0.989286	0.35
0.347239	0.309202	0.343558	0.197789	0.275184	0.224816	0.002454	0.257669	0.51411	0.768098	1	0.004908	0.242945	0.450307	0.744785	0.996319	0.001227	0.239264	0.506748	0.733742	0.997546	0.480982	0.226994	0.292025	0.092138	0.052826	0.003686	0.001227	0.225767	0.426994	0.732515	1	0.038037	0.251534	0.43681	0.801227	0.997546	0.006135	0.310429	0.581595	0.711656	0.992638	0.557055	0.385749	0.003681	0.262577	0.48589	0.743558	0.997546	0.331288
0.423529	0.294118	0.282353	0.261905	0.238095	0.178571	0.023529	0.2	0.494118	0.705882	0.988235	0.070588	0.188235	0.435294	0.729412	1	0.011765	0.305882	0.517647	0.788235	0.964706	0.623529	0.035294	0.341176	0.047619	0.071429	0	0.011765	0.152941	0.423529	0.811765	1	0.235294	0.235294	0.235294	0.247059	0.458824	0.305882	0.376471	0.635294	0.717647	0.905882	0.4	0.452381	0.129412	0.329412	0.6	0.764706	0.964706	0.258824
0.45092	0.392638	0.156442	0.378462	0.12	0.098462	0.006135	0.315951	0.527607	0.760736	0.993865	0.009202	0.340491	0.625767	0.834356	1	0.003067	0.113497	0.199387	0.312883	0.745399	0.671779	0.101227	0.226994	0.067692	0.092308	0	0.003067	0.346626	0.558282	0.757669	1	0.052147	0.122699	0.233129	0.325153	0.518405	0.01227	0.171779	0.47546	0.806748	0.98773	0.220859	0.276923	0.009202	0.156442	0.257669	0.441718	0.97546	0.380368
0.29771	0.419847	0.282443	0.192308	0.161538	0.284615	0.022901	0.251908	0.580153	0.80916	0.992366	0.015267	0.229008	0.427481	0.671756	0.923664	0.007634	0.19084	0.480916	0.748092	1	0.526718	0.244275	0.229008	0.076923	0.046154	0	0.007634	0.221374	0.396947	0.839695	1	0.099237	0.183206	0.282443	0.603053	0.801527	0.40458	0.450382	0.51145	0.687023	0.984733	0.473282	0.4	0.068702	0.198473	0.419847	0.656489	0.977099	0.435115
0.411576	0.315113	0.273312	0.287097	0.251613	0.151613	0.009646	0.263666	0.530547	0.768489	1	0.061093	0.289389	0.540193	0.810289	0.990354	0.003215	0.202572	0.427653	0.620579	0.974277	0.421222	0.102894	0.475884	0.03871	0.090323	0	0.003215	0.273312	0.633441	0.864952	1	0.366559	0.623794	0.675241	0.951768	0.980707	0.006431	0.205788	0.405145	0.527331	0.823151	0.430868	0.341935	0.006431	0.212219	0.401929	0.569132	0.980707	0.315113
0.367816	0.275862	0.356322	0.255814	0.290698	0.186047	0.034483	0.252874	0.482759	0.770115	1	0.126437	0.275862	0.574713	0.747126	0.965517	0.011494	0.114943	0.413793	0.643678	0.988506	0.448276	0.321839	0.229885	0.139535	0.046512	0	0.011494	0.229885	0.643678	0.793103	1	0.045977	0.298851	0.597701	0.816092	0.954023	0.137931	0.183908	0.390805	0.448276	0.505747	0.367816	0.418605	0.045977	0.206897	0.45977	0.62069	0.977011	0.321839
0.2625	0.483333	0.254167	0.205021	0.175732	0.230126	0.025	0.195833	0.3625	0.641667	1	0.008333	0.320833	0.616667	0.85	0.9875	0.004167	0.25	0.404167	0.608333	0.7875	0.375	0.333333	0.291667	0.112971	0.054393	0.004184	0.004167	0.2375	0.508333	0.691667	1	0.016667	0.2625	0.391667	0.55	0.766667	0.075	0.229167	0.825	0.895833	0.9875	0.416667	0.468619	0.020833	0.258333	0.445833	0.6625	0.970833	0.5125
0.346154	0.380342	0.273504	0.257511	0.141631	0.214592	0.012821	0.264957	0.5	0.773504	1	0.008547	0.209402	0.482906	0.717949	0.987179	0.004274	0.25641	0.504274	0.752137	0.978632	0.487179	0.376068	0.136752	0.137339	0.034335	0	0.004274	0.149573	0.542735	0.777778	1	0.094017	0.418803	0.581197	0.803419	0.961538	0.017094	0.166667	0.200855	0.24359	0.487179	0.521368	0.351931	0.017094	0.277778	0.517094	0.752137	0.965812	0.405983
0.316964	0.379464	0.303571	0.215247	0.188341	0.273543	0.035714	0.1875	0.522321	0.763393	0.995536	0.008929	0.227679	0.441964	0.727679	1	0.004464	0.272321	0.508929	0.732143	0.96875	0.598214	0.147321	0.254464	0.044843	0.053812	0	0.004464	0.147321	0.361607	0.598214	1	0.236607	0.5625	0.732143	0.785714	0.9375	0.299107	0.388393	0.625	0.6875	0.955357	0.441964	0.313901	0.102679	0.379464	0.5625	0.732143	0.982143	0.361607
0.327273	0.327273	0.345455	0.247706	0.247706	0.201835	0.045455	0.2	0.472727	0.672727	0.981818	0.018182	0.272727	0.509091	0.790909	1	0.009091	0.209091	0.536364	0.745455	0.990909	0.454545	0.454545	0.090909	0.174312	0.045872	0.009174	0.009091	0.345455	0.563636	0.818182	1	0.081818	0.181818	0.418182	0.718182	0.981818	0.036364	0.045455	0.072727	0.509091	0.536364	0.490909	0.477064	0.018182	0.272727	0.536364	0.736364	0.990909	0.372727
0.304029	0.364469	0.331502	0.231193	0.20367	0.234862	0.009158	0.20696	0.470696	0.741758	1	0.003663	0.254579	0.485348	0.747253	0.998168	0.001832	0.282051	0.512821	0.739927	0.992674	0.441392	0.161172	0.397436	0.06055	0.093578	0.005505	0.001832	0.217949	0.498168	0.771062	1	0.043956	0.382784	0.604396	0.778388	0.921245	0.010989	0.250916	0.456044	0.705128	0.974359	0.540293	0.344954	0.010989	0.296703	0.489011	0.739927	0.992674	0.391941
0.452381	0.25	0.297619	0.277108	0.240964	0.13253	0.071429	0.309524	0.595238	0.761905	1	0.059524	0.321429	0.511905	0.72619	0.964286	0.011905	0.154762	0.27381	0.5	0.892857	0.380952	0.309524	0.309524	0.120482	0.072289	0	0.011905	0.309524	0.47619	0.904762	1	0.02381	0.083333	0.238095	0.345238	0.5	0.52381	0.583333	0.666667	0.809524	0.892857	0.369048	0.433735	0.02381	0.166667	0.392857	0.559524	0.892857	0.321429
0.413223	0.280992	0.305785	0.175	0.258333	0.175	0.016529	0.305785	0.520661	0.77686	0.966942	0.033058	0.181818	0.38843	0.743802	0.991736	0.008264	0.231405	0.495868	0.702479	1	0.404959	0.157025	0.438017	0.05	0.1	0	0.008264	0.181818	0.338843	0.735537	1	0.256198	0.280992	0.380165	0.421488	0.727273	0.07438	0.471074	0.578512	0.826446	0.942149	0.454545	0.35	0.041322	0.305785	0.512397	0.702479	0.92562	0.256198
0.417178	0.358896	0.223926	0.32	0.181538	0.141538	0.021472	0.300613	0.555215	0.791411	1	0.006135	0.211656	0.496933	0.769939	0.981595	0.003067	0.251534	0.43865	0.570552	0.93865	0.493865	0.095092	0.411043	0.055385	0.073846	0	0.003067	0.214724	0.411043	0.674847	1	0.01227	0.046012	0.374233	0.481595	0.601227	0.064417	0.358896	0.631902	0.858896	0.990798	0.447853	0.326154	0.01227	0.248466	0.435583	0.613497	0.981595	0.386503
0.467005	0.294416	0.238579	0.244275	0.193384	0.157761	0.007614	0.203046	0.406091	0.695431	0.992386	0.020305	0.256345	0.525381	0.779188	0.984772	0.002538	0.393401	0.604061	0.77665	1	0.5	0.203046	0.296954	0.061069	0.066158	0.005089	0.002538	0.182741	0.43401	0.72335	1	0.007614	0.634518	0.738579	0.878173	0.964467	0.111675	0.27665	0.370558	0.527919	0.984772	0.393401	0.26972	0.010152	0.48731	0.659898	0.819797	0.977157	0.347716
0.324042	0.412892	0.263066	0.26178	0.148342	0.230366	0.005226	0.290941	0.517422	0.745645	1	0.003484	0.249129	0.583624	0.799652	0.998258	0.001742	0.200348	0.372822	0.585366	0.994774	0.529617	0.148084	0.3223	0.052356	0.073298	0.006981	0.001742	0.336237	0.679443	0.8223	1	0.085366	0.278746	0.409408	0.574913	0.958188	0.019164	0.172474	0.355401	0.527875	0.994774	0.445993	0.279232	0.019164	0.19338	0.372822	0.578397	0.994774	0.439024
0.336683	0.336683	0.326633	0.227273	0.207071	0.207071	0.025126	0.226131	0.487437	0.738693	0.98995	0.01005	0.211055	0.437186	0.703518	0.984925	0.005025	0.266332	0.527638	0.788945	1	0.301508	0.276382	0.422111	0.035354	0.075758	0.015152	0.005025	0.115578	0.351759	0.81407	1	0.055276	0.180905	0.537688	0.61809	0.688442	0.150754	0.326633	0.482412	0.849246	0.984925	0.517588	0.393939	0.020101	0.261307	0.507538	0.79397	0.984925	0.311558
0.368421	0.245614	0.385965	0.132743	0.318584	0.185841	0.026316	0.201754	0.5	0.649123	1	0.04386	0.298246	0.508772	0.807018	0.991228	0.008772	0.245614	0.447368	0.754386	0.95614	0.385965	0.166667	0.447368	0.053097	0.106195	0	0.008772	0.114035	0.350877	0.710526	1	0.280702	0.307018	0.412281	0.45614	0.780702	0.078947	0.473684	0.605263	0.868421	0.982456	0.45614	0.353982	0.052632	0.333333	0.561404	0.754386	0.982456	0.201754
0.52193	0.302632	0.175439	0.273128	0.136564	0.114537	0.013158	0.254386	0.526316	0.789474	1	0.008772	0.311404	0.513158	0.719298	0.991228	0.004386	0.175439	0.399123	0.557018	0.881579	0.45614	0.087719	0.45614	0.035242	0.044053	0	0.004386	0.421053	0.596491	0.837719	1	0.100877	0.118421	0.486842	0.508772	0.885965	0.135965	0.245614	0.359649	0.714912	0.95614	0.289474	0.334802	0.030702	0.241228	0.425439	0.535088	0.881579	0.337719
0.329293	0.345455	0.325253	0.216599	0.234818	0.220648	0.008081	0.20404	0.484848	0.753535	1	0.00404	0.29697	0.557576	0.771717	0.99596	0.00202	0.226263	0.458586	0.69697	0.99798	0.531313	0.171717	0.29697	0.076923	0.040486	0	0.00202	0.220202	0.50303	0.745455	1	0.107071	0.311111	0.470707	0.670707	0.830303	0.074747	0.260606	0.620202	0.872727	0.987879	0.507071	0.287449	0.022222	0.333333	0.561616	0.713131	0.993939	0.371717
0.264612	0.432519	0.302869	0.223404	0.17234	0.271277	0.004251	0.21254	0.426142	0.687566	0.995749	0.002125	0.277365	0.545165	0.772582	1	0.001063	0.236982	0.497343	0.733262	0.993624	0.509033	0.138151	0.352816	0.058511	0.079787	0.009574	0.001063	0.29543	0.561105	0.782147	1	0.005313	0.320935	0.534538	0.611052	0.923486	0.018066	0.190223	0.4017	0.726886	0.992561	0.595112	0.419149	0.005313	0.277365	0.504782	0.737513	0.993624	0.446334
0.311475	0.459016	0.229508	0.249315	0.150685	0.208219	0.005464	0.251366	0.461749	0.79235	0.994536	0.008197	0.259563	0.581967	0.748634	1	0.002732	0.221311	0.418033	0.631148	0.95082	0.860656	0.035519	0.103825	0.016438	0.038356	0.005479	0.002732	0.275956	0.540984	0.756831	1	0.016393	0.021858	0.297814	0.39071	0.885246	0.106557	0.139344	0.191257	0.461749	0.986339	0.363388	0.361644	0.008197	0.18306	0.47541	0.713115	0.980874	0.486339
0.360294	0.283088	0.356618	0.173432	0.269373	0.214022	0.007353	0.261029	0.511029	0.779412	0.996324	0.022059	0.268382	0.522059	0.702206	1	0.003676	0.209559	0.455882	0.713235	0.988971	0.404412	0.172794	0.422794	0.055351	0.092251	0.00369	0.003676	0.205882	0.525735	0.713235	1	0.128676	0.227941	0.555147	0.599265	0.985294	0.022059	0.246324	0.485294	0.797794	0.981618	0.569853	0.398524	0.014706	0.227941	0.466912	0.672794	0.988971	0.3125
0.386905	0.321429	0.291667	0.251497	0.215569	0.215569	0.029762	0.255952	0.434524	0.630952	0.964286	0.011905	0.303571	0.577381	0.779762	0.982143	0.005952	0.190476	0.47619	0.77381	1	0.434524	0.339286	0.22619	0.149701	0.053892	0.005988	0.005952	0.386905	0.52381	0.708333	1	0.142857	0.321429	0.565476	0.833333	0.994048	0.029762	0.077381	0.202381	0.64881	0.934524	0.505952	0.371257	0.029762	0.238095	0.571429	0.791667	0.994048	0.309524
0.406452	0.258065	0.335484	0.181818	0.279221	0.181818	0.019355	0.245161	0.483871	0.741935	1	0.012903	0.264516	0.470968	0.677419	0.993548	0.006452	0.225806	0.496774	0.787097	0.974194	0.335484	0.270968	0.393548	0.097403	0.071429	0.019481	0.006452	0.187097	0.587097	0.767742	1	0.058065	0.277419	0.632258	0.890323	0.980645	0.019355	0.212903	0.387097	0.483871	0.825806	0.380645	0.467532	0.03871	0.219355	0.535484	0.748387	0.967742	0.264516
0.42236	0.282609	0.295031	0.242991	0.208723	0.161994	0.015528	0.167702	0.385093	0.717391	1	0.006211	0.279503	0.509317	0.751553	0.990683	0.003106	0.357143	0.568323	0.776398	0.996894	0.335404	0.114907	0.549689	0.05919	0.05296	0.003115	0.003106	0.462733	0.686335	0.854037	1	0.416149	0.459627	0.664596	0.763975	0.937888	0.052795	0.186335	0.322981	0.571429	0.993789	0.381988	0.386293	0.037267	0.431677	0.57764	0.757764	0.996894	0.304348
0.355372	0.297521	0.347107	0.204969	0.267081	0.186335	0.018595	0.229339	0.541322	0.791322	0.997934	0.004132	0.204545	0.42562	0.702479	1	0.002066	0.289256	0.506198	0.741736	0.995868	0.450413	0.173554	0.376033	0.066253	0.086957	0.004141	0.002066	0.130165	0.402893	0.719008	1	0.008264	0.419421	0.621901	0.762397	0.927686	0.115702	0.316116	0.52686	0.739669	0.993802	0.528926	0.356108	0.004132	0.318182	0.514463	0.764463	0.995868	0.340909
0.463087	0.288591	0.248322	0.236486	0.243243	0.128378	0.013423	0.261745	0.510067	0.838926	1	0.026846	0.201342	0.52349	0.66443	0.986577	0.006711	0.241611	0.449664	0.644295	0.865772	0.422819	0.248322	0.328859	0.128378	0.087838	0.02027	0.006711	0.288591	0.496644	0.731544	1	0.026846	0.348993	0.463087	0.57047	0.838926	0.060403	0.154362	0.657718	0.805369	0.979866	0.315436	0.364865	0.114094	0.302013	0.47651	0.651007	0.946309	0.275168
0.313589	0.397213	0.289199	0.223776	0.178322	0.244755	0.038328	0.229965	0.41115	0.783972	1	0.006969	0.292683	0.526132	0.686411	0.993031	0.003484	0.191638	0.508711	0.790941	0.989547	0.606272	0.188153	0.205575	0.083916	0.048951	0	0.003484	0.355401	0.529617	0.679443	1	0.010453	0.170732	0.313589	0.853659	0.993031	0.101045	0.146341	0.348432	0.804878	0.937282	0.439024	0.405594	0.010453	0.212544	0.522648	0.763066	0.993031	0.390244
0.40724	0.276018	0.316742	0.245455	0.240909	0.154545	0.00905	0.280543	0.579186	0.773756	1	0.054299	0.20362	0.502262	0.760181	0.995475	0.004525	0.226244	0.420814	0.633484	0.9819	0.316742	0.095023	0.588235	0.040909	0.086364	0.004545	0.004525	0.153846	0.447964	0.755656	1	0.117647	0.773756	0.828054	0.850679	0.886878	0.0181	0.235294	0.470588	0.633484	0.986425	0.502262	0.363636	0.0181	0.21267	0.434389	0.628959	0.9819	0.244344
0.35	0.45	0.2	0.305439	0.125523	0.138075	0.008333	0.1875	0.5125	0.766667	1	0.029167	0.2375	0.420833	0.583333	0.9875	0.004167	0.575	0.725	0.85	0.995833	0.645833	0.083333	0.270833	0.033473	0.09205	0	0.004167	0.1875	0.366667	0.5625	1	0.575	0.666667	0.6875	0.733333	0.8875	0.0125	0.5125	0.779167	0.904167	0.979167	0.2875	0.292887	0.025	0.404167	0.683333	0.829167	0.983333	0.4875
0.401198	0.365269	0.233533	0.259036	0.174699	0.180723	0.017964	0.215569	0.562874	0.856287	0.994012	0.011976	0.179641	0.39521	0.682635	1	0.005988	0.293413	0.508982	0.694611	0.958084	0.42515	0.281437	0.293413	0.078313	0.054217	0.018072	0.005988	0.131737	0.389222	0.54491	1	0.107784	0.227545	0.407186	0.718563	0.808383	0.047904	0.562874	0.640719	0.898204	0.976048	0.437126	0.325301	0.107784	0.275449	0.449102	0.694611	0.958084	0.341317
0.250755	0.425982	0.323263	0.187879	0.178788	0.272727	0.006042	0.259819	0.528701	0.776435	1	0.012085	0.205438	0.471299	0.703927	0.996979	0.003021	0.265861	0.486405	0.746224	0.978852	0.601208	0.256798	0.141994	0.075758	0.039394	0.00303	0.003021	0.175227	0.519637	0.773414	1	0.012085	0.274924	0.410876	0.628399	0.930514	0.033233	0.335347	0.483384	0.734139	0.978852	0.577039	0.345455	0.012085	0.232628	0.438066	0.673716	0.978852	0.444109
0.28022	0.406593	0.313187	0.21547	0.198895	0.270718	0.06044	0.247253	0.5	0.791209	1	0.010989	0.258242	0.538462	0.703297	0.967033	0.005495	0.164835	0.428571	0.774725	0.994505	0.554945	0.417582	0.027473	0.127072	0.005525	0.005525	0.005495	0.357143	0.604396	0.741758	1	0.027473	0.17033	0.340659	0.824176	0.994505	0.428571	0.428571	0.434066	0.43956	0.450549	0.576923	0.364641	0.016484	0.21978	0.527473	0.747253	0.994505	0.368132
0.37	0.31	0.32	0.20202	0.262626	0.191919	0.1	0.24	0.47	0.69	0.98	0.03	0.21	0.53	0.83	1	0.01	0.22	0.41	0.68	0.97	0.46	0.54	0	0.181818	0	0	0.01	0.3	0.53	0.79	1	0.02	0.19	0.39	0.68	0.96	0	0	0	0	0	0.36	0.505051	0.02	0.2	0.42	0.7	0.97	0.24
0.375	0.326923	0.298077	0.231884	0.26087	0.15942	0.009615	0.254808	0.509615	0.730769	0.985577	0.038462	0.230769	0.403846	0.663462	1	0.004808	0.206731	0.591346	0.75	0.990385	0.519231	0.153846	0.326923	0.086957	0.067633	0	0.004808	0.278846	0.408654	0.701923	1	0.009615	0.067308	0.591346	0.75	0.9375	0.096154	0.201923	0.567308	0.802885	0.995192	0.524038	0.376812	0.014423	0.346154	0.528846	0.759615	0.995192	0.336538
0.359459	0.348649	0.291892	0.265583	0.216802	0.197832	0.005405	0.22973	0.464865	0.762162	0.997297	0.010811	0.218919	0.481081	0.710811	1	0.002703	0.3	0.543243	0.735135	0.994595	0.483784	0.156757	0.359459	0.056911	0.067751	0.00813	0.002703	0.227027	0.540541	0.775676	1	0.235135	0.386486	0.543243	0.683784	0.994595	0.091892	0.2	0.427027	0.751351	0.918919	0.502703	0.325203	0.054054	0.291892	0.5	0.713514	0.994595	0.383784
0.459902	0.418985	0.121113	0.340984	0.106557	0.108197	0.00982	0.304419	0.513912	0.734861	1	0.003273	0.230769	0.518822	0.780687	0.998363	0.001637	0.162029	0.263502	0.621931	0.978723	0.783961	0.06874	0.1473	0.027869	0.040984	0.001639	0.001637	0.296236	0.492635	0.779051	1	0.022913	0.198036	0.230769	0.584288	0.978723	0.00491	0.242226	0.623568	0.679214	0.968903	0.343699	0.288525	0.008183	0.168576	0.343699	0.494272	0.978723	0.500818
0.425676	0.256757	0.317568	0.183673	0.29932	0.129252	0.013514	0.25	0.412162	0.702703	1	0.087838	0.243243	0.547297	0.675676	0.986486	0.006757	0.202703	0.533784	0.790541	0.993243	0.391892	0.297297	0.310811	0.142857	0.061224	0.006803	0.006757	0.155405	0.5	0.736486	1	0.013514	0.243243	0.614865	0.885135	0.97973	0.060811	0.310811	0.391892	0.648649	0.824324	0.391892	0.47619	0.02027	0.202703	0.533784	0.743243	0.972973	0.304054
0.457143	0.285714	0.257143	0.259615	0.192308	0.163462	0.019048	0.142857	0.428571	0.752381	1	0.028571	0.4	0.6	0.828571	0.990476	0.009524	0.238095	0.438095	0.685714	0.857143	0.714286	0.028571	0.257143	0.038462	0.038462	0	0.009524	0.171429	0.457143	0.819048	1	0.257143	0.257143	0.257143	0.266667	0.438095	0.314286	0.361905	0.571429	0.638095	0.704762	0.32381	0.384615	0.171429	0.342857	0.561905	0.695238	0.904762	0.295238
0.349206	0.392416	0.258377	0.269197	0.172992	0.203883	0.002646	0.250441	0.516755	0.77866	1	0.001764	0.22134	0.492063	0.76455	0.998236	0.000882	0.263668	0.477072	0.687831	0.989418	0.600529	0.13933	0.260141	0.067961	0.064431	0.004413	0.000882	0.208995	0.511464	0.75485	1	0.034392	0.382716	0.529982	0.708995	0.935626	0.008818	0.236332	0.371252	0.783069	0.989418	0.492945	0.372462	0.008818	0.203704	0.442681	0.671958	0.992945	0.385362
0.298969	0.357388	0.343643	0.213793	0.22069	0.241379	0.006873	0.268041	0.542955	0.783505	0.996564	0.017182	0.230241	0.47079	0.707904	0.993127	0.003436	0.243986	0.484536	0.725086	1	0.388316	0.168385	0.443299	0.048276	0.110345	0	0.003436	0.19244	0.450172	0.694158	1	0.168385	0.323024	0.439863	0.639175	0.728522	0.020619	0.230241	0.52921	0.824742	0.986254	0.546392	0.406897	0.010309	0.243986	0.477663	0.676976	0.982818	0.347079
0.309577	0.447661	0.242762	0.261161	0.189732	0.178571	0.013363	0.200445	0.427617	0.697105	0.995546	0.008909	0.33853	0.565702	0.815145	1	0.002227	0.18931	0.365256	0.694878	0.997773	0.632517	0.160356	0.207127	0.060268	0.060268	0.002232	0.002227	0.298441	0.550111	0.790646	1	0.024499	0.135857	0.342984	0.708241	0.975501	0.053452	0.211581	0.423163	0.757238	0.993318	0.510022	0.334821	0.004454	0.267261	0.550111	0.806236	0.988864	0.432071
0.4	0.266667	0.333333	0.201681	0.252101	0.210084	0.016667	0.216667	0.516667	0.775	0.991667	0.041667	0.325	0.5	0.75	1	0.008333	0.175	0.408333	0.716667	0.916667	0.383333	0.166667	0.45	0.042017	0.092437	0.008403	0.008333	0.116667	0.341667	0.683333	1	0.266667	0.3	0.4	0.708333	0.75	0.075	0.45	0.591667	0.85	0.966667	0.441667	0.352941	0.05	0.366667	0.525	0.716667	0.95	0.166667
0.397436	0.337607	0.264957	0.23176	0.227468	0.188841	0.008547	0.188034	0.397436	0.688034	1	0.025641	0.264957	0.504274	0.730769	0.974359	0.004274	0.350427	0.559829	0.777778	0.995726	0.495726	0.179487	0.324786	0.072961	0.081545	0.012876	0.004274	0.136752	0.273504	0.623932	1	0.247863	0.41453	0.478632	0.666667	0.747863	0.111111	0.512821	0.769231	0.884615	0.995726	0.440171	0.377682	0.017094	0.435897	0.645299	0.777778	0.991453	0.337607
0.353695	0.333005	0.3133	0.218935	0.229783	0.216963	0.00197	0.224631	0.493596	0.744828	1	0.011823	0.231527	0.454187	0.725123	0.99803	0.000985	0.28867	0.544828	0.776355	0.997044	0.44335	0.13202	0.424631	0.059172	0.086785	0.005917	0.000985	0.155665	0.359606	0.744828	1	0.025616	0.24335	0.545813	0.848276	0.990148	0.00197	0.400985	0.565517	0.712315	0.996059	0.504433	0.378698	0.003941	0.29064	0.539901	0.781281	0.997044	0.330049
0.290909	0.384848	0.324242	0.203647	0.221884	0.221884	0.009091	0.242424	0.445455	0.736364	0.981818	0.012121	0.272727	0.478788	0.748485	0.99697	0.00303	0.221212	0.551515	0.760606	1	0.369697	0.160606	0.469697	0.045593	0.100304	0.00304	0.00303	0.215152	0.50303	0.745455	1	0.154545	0.284848	0.521212	0.70303	0.784848	0.015152	0.245455	0.487879	0.833333	0.990909	0.518182	0.401216	0.021212	0.236364	0.527273	0.69697	0.984848	0.381818
0.30084	0.431933	0.267227	0.208754	0.171717	0.239057	0.003361	0.193277	0.411765	0.69916	0.991597	0.005042	0.315966	0.584874	0.828571	0.998319	0.001681	0.231933	0.445378	0.721008	1	0.531092	0.2	0.268908	0.089226	0.055556	0.001684	0.001681	0.242017	0.559664	0.709244	1	0.05042	0.215126	0.388235	0.630252	0.986555	0.028571	0.321008	0.52437	0.852101	0.963025	0.563025	0.350168	0.018487	0.305882	0.584874	0.764706	0.993277	0.411765
0.30303	0.400932	0.296037	0.261682	0.186916	0.247664	0.006993	0.268065	0.515152	0.780886	0.993007	0.004662	0.205128	0.459207	0.731935	0.997669	0.002331	0.272727	0.51049	0.724942	1	0.386946	0.090909	0.522145	0.035047	0.114486	0.002336	0.002331	0.228438	0.454545	0.685315	1	0.048951	0.104895	0.181818	0.223776	0.344988	0.013986	0.389277	0.594406	0.804196	0.993007	0.599068	0.411215	0.009324	0.261072	0.477855	0.729604	0.995338	0.435897
0.408654	0.278846	0.3125	0.21256	0.2657	0.164251	0.014423	0.259615	0.5	0.778846	1	0.009615	0.173077	0.418269	0.639423	0.971154	0.004808	0.307692	0.514423	0.75	0.990385	0.475962	0.149038	0.375	0.062802	0.072464	0.033816	0.004808	0.149038	0.514423	0.711538	1	0.230769	0.293269	0.596154	0.697115	0.961538	0.038462	0.346154	0.456731	0.745192	0.985577	0.461538	0.396135	0.019231	0.360577	0.514423	0.745192	0.975962	0.254808
0.323484	0.412131	0.264386	0.260125	0.165109	0.266355	0.00311	0.211509	0.438569	0.727838	1	0.006221	0.264386	0.513219	0.744946	0.99689	0.001555	0.261275	0.531882	0.77916	0.990669	0.525661	0.111975	0.362364	0.101246	0.095016	0.010903	0.001555	0.227061	0.438569	0.741835	1	0.066874	0.276827	0.528771	0.734059	0.970451	0.031104	0.311042	0.539658	0.755832	0.968896	0.342146	0.507788	0.018663	0.258165	0.517885	0.755832	0.987558	0.421462
0.397638	0.334646	0.267717	0.272727	0.229249	0.193676	0.011811	0.185039	0.452756	0.818898	1	0.007874	0.283465	0.503937	0.669291	0.996063	0.003937	0.275591	0.484252	0.700787	0.96063	0.401575	0.188976	0.409449	0.090909	0.090909	0.011858	0.003937	0.153543	0.440945	0.724409	1	0.031496	0.26378	0.326772	0.515748	0.944882	0.015748	0.38189	0.673228	0.799213	0.984252	0.456693	0.411067	0.027559	0.318898	0.519685	0.669291	0.96063	0.330709
0.425676	0.310811	0.263514	0.265306	0.190476	0.210884	0.013514	0.202703	0.540541	0.810811	1	0.094595	0.22973	0.47973	0.682432	0.993243	0.006757	0.236486	0.412162	0.689189	0.952703	0.547297	0.22973	0.222973	0.108844	0.040816	0	0.006757	0.175676	0.459459	0.763514	1	0.040541	0.222973	0.425676	0.648649	0.858108	0.297297	0.344595	0.587838	0.912162	0.972973	0.344595	0.367347	0.027027	0.256757	0.439189	0.621622	0.959459	0.304054
0.315018	0.43956	0.245421	0.294118	0.154412	0.1875	0.007326	0.21978	0.424908	0.695971	0.981685	0.010989	0.227106	0.567766	0.81685	1	0.003663	0.249084	0.472527	0.699634	0.989011	0.626374	0.113553	0.260073	0.036765	0.051471	0	0.003663	0.186813	0.520147	0.842491	1	0.054945	0.527473	0.630037	0.688645	0.791209	0.091575	0.289377	0.380952	0.575092	0.74359	0.347985	0.352941	0.018315	0.201465	0.538462	0.699634	0.989011	0.428571
0.331155	0.361656	0.30719	0.235808	0.200873	0.21179	0.015251	0.285403	0.503268	0.732026	0.989107	0.004357	0.189542	0.492375	0.751634	1	0.002179	0.267974	0.494553	0.753813	0.993464	0.3878	0.052288	0.559913	0.021834	0.078603	0	0.002179	0.095861	0.28976	0.581699	1	0.124183	0.156863	0.187364	0.200436	0.405229	0.139434	0.461874	0.627451	0.797386	0.954248	0.407407	0.423581	0.010893	0.287582	0.555556	0.793028	0.995643	0.37037
0.330739	0.354086	0.315175	0.247563	0.210526	0.251462	0.003891	0.241245	0.464981	0.741245	1	0.009728	0.247082	0.548638	0.768482	0.998054	0.001946	0.249027	0.476654	0.731518	0.986381	0.540856	0.138132	0.321012	0.076023	0.099415	0.005848	0.001946	0.235409	0.447471	0.731518	1	0.005837	0.13035	0.389105	0.525292	0.889105	0.040856	0.33463	0.605058	0.797665	0.992218	0.571984	0.382066	0.005837	0.254864	0.507782	0.749027	0.988327	0.381323
0.318447	0.353398	0.328155	0.233463	0.225681	0.266537	0.009709	0.223301	0.446602	0.71068	0.992233	0.003883	0.264078	0.506796	0.759223	1	0.001942	0.262136	0.524272	0.763107	0.998058	0.438835	0.231068	0.330097	0.103113	0.05642	0.001946	0.001942	0.248544	0.481553	0.726214	1	0.005825	0.287379	0.434951	0.825243	0.996117	0.015534	0.225243	0.553398	0.730097	0.970874	0.580583	0.357977	0.007767	0.248544	0.473786	0.768932	0.998058	0.347573
0.170306	0.384279	0.445415	0.127193	0.118421	0.315789	0.008734	0.131004	0.371179	0.615721	0.877729	0.017467	0.270742	0.576419	0.79476	1	0.004367	0.213974	0.471616	0.724891	0.995633	0.148472	0	0.851528	0	0.078947	0	0.004367	0.222707	0.515284	0.624454	1	0	0	0	0	0	0.0131	0.270742	0.484716	0.772926	0.995633	0.803493	0.210526	0.017467	0.279476	0.502183	0.755459	0.991266	0.349345
0.257143	0.428571	0.314286	0.247126	0.178161	0.275862	0.04	0.262857	0.48	0.742857	0.96	0.011429	0.194286	0.457143	0.708571	1	0.005714	0.234286	0.502857	0.754286	0.982857	0.56	0.32	0.12	0.103448	0.057471	0	0.005714	0.245714	0.52	0.76	1	0.131429	0.348571	0.554286	0.737143	0.868571	0.028571	0.068571	0.417143	0.451429	0.965714	0.537143	0.321839	0.017143	0.24	0.497143	0.72	0.971429	0.462857
0.331541	0.304659	0.363799	0.199282	0.260323	0.184919	0.003584	0.252688	0.521505	0.774194	0.998208	0.026882	0.243728	0.473118	0.741935	0.982079	0.001792	0.236559	0.503584	0.729391	1	0.483871	0.154122	0.362007	0.077199	0.070018	0.001795	0.001792	0.232975	0.521505	0.732975	1	0.107527	0.37276	0.740143	0.817204	0.96595	0.005376	0.175627	0.453405	0.688172	0.994624	0.587814	0.355476	0.012545	0.301075	0.53405	0.741935	0.992832	0.310036
0.211679	0.405109	0.383212	0.179487	0.164835	0.274725	0.007299	0.284672	0.587591	0.777372	0.967153	0.021898	0.211679	0.569343	0.788321	0.99635	0.00365	0.237226	0.419708	0.613139	1	0.416058	0.186131	0.39781	0.076923	0.025641	0.010989	0.00365	0.5	0.664234	0.868613	1	0.014599	0.510949	0.613139	0.759124	0.930657	0.029197	0.226277	0.324818	0.423358	0.857664	0.653285	0.307692	0.010949	0.277372	0.459854	0.718978	0.992701	0.394161
0.284192	0.399645	0.316163	0.231317	0.179715	0.245552	0.003552	0.238011	0.433393	0.722913	1	0.010657	0.26643	0.513321	0.774423	0.996448	0.001776	0.236234	0.497336	0.719361	0.994671	0.479574	0.161634	0.358792	0.069395	0.069395	0.005338	0.001776	0.360568	0.603908	0.825933	1	0.055062	0.129663	0.522202	0.689165	0.994671	0.005329	0.204263	0.337478	0.598579	0.912966	0.664298	0.327402	0.005329	0.236234	0.499112	0.717584	0.994671	0.381883
0.223881	0.502488	0.273632	0.23	0.14	0.215	0.014925	0.238806	0.437811	0.746269	0.975124	0.00995	0.218905	0.542289	0.751244	1	0.004975	0.278607	0.442786	0.661692	0.955224	0.567164	0.318408	0.114428	0.115	0.035	0.005	0.004975	0.233831	0.477612	0.746269	1	0.029851	0.199005	0.373134	0.562189	0.686567	0.368159	0.865672	0.895522	0.925373	0.965174	0.606965	0.26	0.0199	0.238806	0.457711	0.646766	0.970149	0.517413
0.270588	0.482353	0.247059	0.261905	0.154762	0.27381	0.011765	0.211765	0.388235	0.611765	0.976471	0.023529	0.188235	0.411765	0.670588	1	0.082353	0.423529	0.623529	0.823529	0.964706	0.611765	0.164706	0.223529	0.178571	0.107143	0.011905	0.011765	0.247059	0.564706	0.788235	1	0.070588	0.541176	0.717647	0.823529	0.964706	0.141176	0.176471	0.294118	0.447059	0.529412	0.329412	0.357143	0.047059	0.270588	0.564706	0.835294	0.952941	0.552941
0.264516	0.425806	0.309677	0.207792	0.175325	0.285714	0.025806	0.232258	0.503226	0.780645	1	0.032258	0.219355	0.4	0.632258	0.987097	0.006452	0.309677	0.606452	0.806452	0.974194	0.496774	0.006452	0.496774	0.012987	0.077922	0	0.006452	0.122581	0.303226	0.606452	1	0.348387	0.348387	0.348387	0.348387	0.348387	0.174194	0.477419	0.625806	0.774194	0.941935	0.470968	0.38961	0.019355	0.380645	0.606452	0.787097	0.974194	0.445161
0.31135	0.368098	0.320552	0.228879	0.207373	0.230415	0.01227	0.25	0.470859	0.697853	0.993865	0.003067	0.256135	0.509202	0.791411	1	0.001534	0.239264	0.48773	0.726994	0.996933	0.43865	0.196319	0.365031	0.078341	0.084485	0.004608	0.001534	0.243865	0.506135	0.754601	1	0.09816	0.18865	0.404908	0.773006	0.969325	0.006135	0.282209	0.529141	0.711656	0.976994	0.570552	0.384025	0.003067	0.27454	0.501534	0.745399	0.996933	0.377301
0.31528	0.365571	0.319149	0.203488	0.199612	0.238372	0.009671	0.288201	0.555126	0.764023	0.998066	0.007737	0.2147	0.444874	0.731141	0.992263	0.001934	0.245648	0.500967	0.748549	1	0.653772	0.346228	0	0.135659	0	0	0.001934	0.224371	0.462282	0.663443	1	0.007737	0.303675	0.564797	0.820116	0.996132	0	0	0	0	0	0.59381	0.329457	0.007737	0.237911	0.481625	0.767892	0.994197	0.39265
0.274336	0.265487	0.460177	0.142857	0.232143	0.321429	0.035398	0.141593	0.292035	0.725664	0.99115	0.053097	0.318584	0.575221	0.716814	0.973451	0.00885	0.309735	0.486726	0.761062	1	0.362832	0.185841	0.451327	0.0625	0.098214	0.026786	0.00885	0.283186	0.513274	0.619469	1	0.132743	0.168142	0.318584	0.380531	0.477876	0.017699	0.115044	0.699115	0.849558	0.964602	0.584071	0.392857	0.053097	0.336283	0.522124	0.769912	0.964602	0.256637
0.2	0.342	0.458	0.154309	0.150301	0.316633	0.012	0.258	0.51	0.758	0.996	0.006	0.248	0.508	0.776	1	0.002	0.238	0.486	0.738	0.998	0.202	0.026	0.772	0.01002	0.078156	0.002004	0.002	0.234	0.506	0.83	1	0.106	0.11	0.848	0.878	0.886	0.02	0.26	0.488	0.724	0.996	0.718	0.220441	0.02	0.282	0.496	0.752	0.992	0.314
0.349481	0.314879	0.33564	0.204861	0.197917	0.190972	0.072664	0.217993	0.404844	0.629758	0.982699	0.00692	0.269896	0.508651	0.785467	0.99654	0.00346	0.256055	0.529412	0.771626	1	0.401384	0.089965	0.508651	0.03125	0.086806	0.003472	0.00346	0.242215	0.456747	0.813149	1	0.467128	0.484429	0.816609	0.903114	0.99654	0.013841	0.211073	0.429066	0.622837	0.982699	0.477509	0.3125	0.010381	0.352941	0.595156	0.785467	0.989619	0.311419
0.376254	0.376254	0.247492	0.268007	0.224456	0.180905	0.008361	0.294314	0.489967	0.727425	0.998328	0.003344	0.198997	0.454849	0.712375	0.979933	0.001672	0.319398	0.575251	0.807692	1	0.361204	0.003344	0.635452	0.00335	0.117253	0	0.001672	0.157191	0.351171	0.645485	1	0.489967	0.489967	0.489967	0.489967	0.491639	0.026756	0.337793	0.575251	0.780936	0.994983	0.43311	0.438861	0.005017	0.282609	0.580268	0.785953	0.996656	0.392977
0.256065	0.450135	0.293801	0.202703	0.143243	0.259459	0.016173	0.239892	0.625337	0.832884	0.994609	0.005391	0.247978	0.455526	0.695418	1	0.002695	0.229111	0.477089	0.719677	0.973046	0.455526	0.272237	0.272237	0.089189	0.051351	0.002703	0.002695	0.277628	0.455526	0.708895	1	0.024259	0.221024	0.444744	0.614555	0.924528	0.048518	0.239892	0.665768	0.789757	0.991914	0.544474	0.383784	0.021563	0.256065	0.487871	0.716981	0.983827	0.460916
0.22365	0.349614	0.426735	0.170103	0.164948	0.306701	0.005141	0.321337	0.51928	0.8509	0.997429	0.007712	0.22108	0.478149	0.748072	1	0.002571	0.231362	0.514139	0.727506	0.992288	0.287918	0.071979	0.640103	0.025773	0.07732	0.015464	0.002571	0.305913	0.503856	0.701799	1	0.03599	0.323907	0.488432	0.920308	0.956298	0.056555	0.236504	0.452442	0.732648	0.984576	0.699229	0.262887	0.010283	0.251928	0.478149	0.717224	0.992288	0.326478
0.337079	0.292135	0.370787	0.204545	0.272727	0.272727	0.022472	0.247191	0.550562	0.775281	0.988764	0.033708	0.224719	0.539326	0.707865	0.955056	0.011236	0.179775	0.41573	0.640449	1	0.314607	0.235955	0.449438	0.079545	0.079545	0.011364	0.011236	0.146067	0.460674	0.629213	1	0.033708	0.078652	0.47191	0.52809	0.865169	0.157303	0.258427	0.651685	0.764045	0.977528	0.606742	0.386364	0.033708	0.202247	0.404494	0.640449	0.966292	0.348315
0.349432	0.286932	0.363636	0.182336	0.264957	0.22792	0.019886	0.315341	0.528409	0.758523	1	0.005682	0.230114	0.497159	0.78125	0.977273	0.002841	0.161932	0.471591	0.715909	0.994318	0.267045	0.144886	0.588068	0.045584	0.051282	0.011396	0.002841	0.392045	0.650568	0.857955	1	0.008523	0.247159	0.747159	0.795455	0.980114	0.019886	0.190341	0.380682	0.588068	0.920455	0.536932	0.39886	0.008523	0.204545	0.465909	0.710227	0.980114	0.309659
0.320588	0.344118	0.335294	0.188791	0.265487	0.256637	0.005882	0.229412	0.567647	0.782353	0.991176	0.008824	0.252941	0.438235	0.688235	1	0.002941	0.247059	0.517647	0.770588	0.988235	0.426471	0.320588	0.252941	0.123894	0.058997	0.0059	0.002941	0.208824	0.397059	0.697059	1	0.008824	0.126471	0.482353	0.761765	0.988235	0.273529	0.435294	0.582353	0.732353	0.952941	0.667647	0.336283	0.008824	0.244118	0.505882	0.729412	0.988235	0.405882
0.444444	0.240741	0.314815	0.273292	0.26087	0.136646	0.012346	0.265432	0.444444	0.623457	0.993827	0.030864	0.240741	0.506173	0.734568	0.962963	0.006173	0.179012	0.635802	0.82716	1	0.462963	0.265432	0.271605	0.10559	0.043478	0.006211	0.006173	0.401235	0.518519	0.722222	1	0.030864	0.635802	0.746914	0.845679	0.950617	0.061728	0.123457	0.277778	0.345679	0.987654	0.41358	0.385093	0.018519	0.209877	0.660494	0.833333	0.981481	0.271605
0.291971	0.379562	0.328467	0.169118	0.095588	0.227941	0.014599	0.145985	0.40146	0.510949	0.970803	0.021898	0.277372	0.583942	0.744526	0.992701	0.007299	0.328467	0.554745	0.817518	1	0.562044	0.218978	0.218978	0.110294	0.051471	0.007353	0.007299	0.233577	0.445255	0.642336	1	0.087591	0.306569	0.481752	0.671533	0.934307	0.145985	0.189781	0.759124	0.810219	0.890511	0.518248	0.25	0.021898	0.321168	0.562044	0.832117	0.985401	0.40146
0.194503	0.43129	0.374207	0.150424	0.127119	0.319915	0.004228	0.300211	0.621564	0.805497	1	0.010571	0.249471	0.498943	0.731501	0.995772	0.002114	0.236786	0.471459	0.693446	0.997886	0.422833	0.118393	0.458774	0.063559	0.072034	0.004237	0.002114	0.226216	0.562368	0.767442	1	0.006342	0.086681	0.41649	0.477801	0.989429	0.099366	0.272727	0.513742	0.678647	0.957717	0.794926	0.194915	0.006342	0.234672	0.490486	0.727273	0.991543	0.403805
0.2	0.416949	0.383051	0.163265	0.119048	0.312925	0.00678	0.284746	0.589831	0.905085	1	0.016949	0.250847	0.532203	0.789831	0.99661	0.00339	0.213559	0.40339	0.627119	0.918644	0.376271	0.030508	0.59322	0.006803	0.088435	0	0.00339	0.288136	0.698305	0.905085	1	0.491525	0.494915	0.501695	0.508475	0.518644	0.010169	0.19661	0.389831	0.644068	0.844068	0.691525	0.244898	0.010169	0.233898	0.437288	0.671186	0.932203	0.349153
0.356923	0.283077	0.36	0.209877	0.259259	0.175926	0.018462	0.283077	0.541538	0.775385	0.987692	0.009231	0.301538	0.495385	0.750769	1	0.003077	0.175385	0.415385	0.652308	0.990769	0.387692	0.172308	0.44	0.055556	0.074074	0.012346	0.003077	0.243077	0.550769	0.803077	1	0.070769	0.375385	0.569231	0.704615	0.944615	0.012308	0.138462	0.458462	0.636923	0.993846	0.510769	0.32716	0.006154	0.224615	0.452308	0.683077	0.993846	0.307692
0.287792	0.395844	0.316364	0.219854	0.18659	0.256757	0.002078	0.289351	0.588052	0.808831	0.999481	0.001039	0.201039	0.442597	0.691429	1	0.000519	0.275844	0.518961	0.75013	0.997922	0.536623	0.22961	0.233766	0.086798	0.0421	0.001559	0.000519	0.214545	0.417143	0.629091	1	0.031688	0.251429	0.438442	0.583896	0.998442	0.005195	0.66961	0.759481	0.896623	0.994805	0.529351	0.390852	0.002078	0.221818	0.484156	0.74961	0.998442	0.420779
0.28866	0.412371	0.298969	0.196891	0.170984	0.248705	0.07732	0.350515	0.551546	0.742268	1	0.010309	0.216495	0.489691	0.757732	0.994845	0.005155	0.221649	0.438144	0.71134	0.989691	0.56701	0.128866	0.304124	0.072539	0.051813	0.010363	0.005155	0.304124	0.592784	0.829897	1	0.180412	0.309278	0.340206	0.78866	0.948454	0.020619	0.087629	0.381443	0.5	0.845361	0.417526	0.435233	0.015464	0.164948	0.365979	0.659794	0.984536	0.43299
0.384466	0.35534	0.260194	0.275024	0.206025	0.18173	0.004854	0.282524	0.526214	0.762136	1	0.001942	0.237864	0.523301	0.728155	0.999029	0.000971	0.209709	0.440777	0.734951	0.996117	0.498058	0.153398	0.348544	0.068027	0.060253	0.005831	0.000971	0.251456	0.536893	0.704854	1	0.01068	0.141748	0.371845	0.635922	0.825243	0.007767	0.28835	0.452427	0.881553	0.996117	0.428155	0.371234	0.002913	0.167961	0.381553	0.686408	0.996117	0.380583
0.303614	0.378313	0.318072	0.205314	0.178744	0.28744	0.012048	0.236145	0.489157	0.773494	1	0.004819	0.238554	0.46747	0.720482	0.995181	0.00241	0.26506	0.518072	0.759036	0.987952	0.450602	0.253012	0.296386	0.091787	0.057971	0.004831	0.00241	0.185542	0.424096	0.679518	1	0.014458	0.122892	0.436145	0.766265	0.990361	0.166265	0.395181	0.612048	0.787952	0.978313	0.549398	0.434783	0.016867	0.293976	0.559036	0.773494	0.987952	0.409639
0.383648	0.273585	0.342767	0.211356	0.264984	0.179811	0.025157	0.264151	0.455975	0.795597	1	0.006289	0.213836	0.525157	0.698113	0.996855	0.003145	0.232704	0.484277	0.72956	0.981132	0.459119	0.213836	0.327044	0.078864	0.091483	0.009464	0.003145	0.245283	0.474843	0.751572	1	0.009434	0.22327	0.446541	0.688679	0.842767	0.078616	0.320755	0.528302	0.889937	0.990566	0.493711	0.429022	0.009434	0.301887	0.531447	0.713836	0.981132	0.305031
0.146667	0.693333	0.16	0.228188	0.013423	0.161074	0.02	0.2	0.506667	0.626667	0.886667	0.013333	0.286667	0.486667	0.72	0.993333	0.006667	0.06	0.526667	0.933333	1	0.826667	0.073333	0.1	0.006711	0.020134	0.006711	0.006667	0.3	0.506667	0.713333	1	0.92	0.926667	0.946667	0.966667	0.986667	0.013333	0.026667	0.053333	0.08	0.913333	0.253333	0.107383	0.026667	0.08	0.28	0.92	0.986667	0.733333
0.24734	0.465426	0.287234	0.229333	0.138667	0.261333	0.005319	0.24734	0.422872	0.760638	0.99734	0.007979	0.231383	0.534574	0.736702	0.992021	0.00266	0.25266	0.476064	0.757979	1	0.406915	0.204787	0.388298	0.08	0.074667	0	0.00266	0.361702	0.529255	0.744681	1	0.037234	0.287234	0.632979	0.845745	0.981383	0.010638	0.210106	0.351064	0.659574	0.944149	0.630319	0.373333	0.023936	0.260638	0.473404	0.731383	0.992021	0.510638
0.268939	0.458333	0.272727	0.254753	0.152091	0.262357	0.011364	0.227273	0.488636	0.746212	1	0.007576	0.204545	0.458333	0.704545	0.996212	0.003788	0.295455	0.609848	0.795455	0.992424	0.587121	0.272727	0.140152	0.106464	0.038023	0	0.003788	0.19697	0.454545	0.662879	1	0.015152	0.337121	0.469697	0.689394	0.818182	0.060606	0.113636	0.886364	0.931818	0.992424	0.57197	0.357414	0.018939	0.30303	0.503788	0.765152	0.988636	0.435606
0.28	0.432	0.288	0.265688	0.17223	0.257677	0.004	0.241333	0.5	0.742667	0.993333	0.002667	0.224	0.489333	0.762667	0.998667	0.001333	0.274667	0.509333	0.725333	1	0.498667	0.077333	0.424	0.026702	0.101469	0.00534	0.001333	0.138667	0.401333	0.650667	1	0.048	0.222667	0.284	0.362667	0.788	0.094667	0.446667	0.682667	0.821333	0.989333	0.497333	0.333778	0.02	0.362667	0.584	0.774667	0.993333	0.456
0.352632	0.352632	0.294737	0.253298	0.176781	0.221636	0.005263	0.268421	0.478947	0.776316	1	0.015789	0.265789	0.523684	0.736842	0.997368	0.002632	0.181579	0.463158	0.739474	0.992105	0.528947	0.236842	0.234211	0.084433	0.047493	0.005277	0.002632	0.278947	0.534211	0.778947	1	0.068421	0.444737	0.634211	0.828947	0.976316	0.021053	0.105263	0.342105	0.581579	0.910526	0.55	0.311346	0.013158	0.257895	0.455263	0.713158	0.992105	0.360526
0.235294	0.375	0.389706	0.185185	0.17037	0.251852	0.051471	0.25	0.455882	0.801471	0.955882	0.029412	0.272059	0.470588	0.742647	1	0.007353	0.205882	0.5	0.727941	0.977941	0.455882	0.169118	0.375	0.074074	0.059259	0	0.007353	0.286765	0.433824	0.816176	1	0.308824	0.477941	0.522059	0.852941	0.985294	0.051471	0.132353	0.573529	0.683824	0.801471	0.617647	0.296296	0.022059	0.242647	0.514706	0.698529	0.977941	0.301471
0.254613	0.414207	0.331181	0.190212	0.173592	0.268698	0.001845	0.256458	0.505535	0.75	0.99262	0.00369	0.267528	0.499077	0.74631	1	0.000923	0.228782	0.48893	0.749077	0.999077	0.429889	0.160517	0.409594	0.065559	0.078486	0.00277	0.000923	0.225092	0.438192	0.711255	1	0.009225	0.210332	0.389299	0.714022	0.98893	0.017528	0.276753	0.554428	0.785978	0.987085	0.664207	0.32687	0.008303	0.24262	0.48893	0.72786	0.997232	0.432657
0.396396	0.297297	0.306306	0.190909	0.290909	0.209091	0.036036	0.234234	0.495495	0.72973	1	0.018018	0.216216	0.486486	0.756757	0.990991	0.009009	0.243243	0.45045	0.711712	0.981982	0.495495	0.396396	0.108108	0.127273	0.036364	0	0.009009	0.216216	0.486486	0.756757	1	0.225225	0.36036	0.576577	0.783784	0.927928	0.072072	0.09009	0.117117	0.144144	0.315315	0.477477	0.418182	0.054054	0.324324	0.54955	0.702703	0.963964	0.297297
0.308086	0.377687	0.314227	0.230533	0.209016	0.253074	0.005118	0.224156	0.472876	0.761515	1	0.003071	0.254862	0.485159	0.72262	0.997953	0.001024	0.257932	0.529171	0.781986	0.995906	0.311157	0.060389	0.628454	0.025615	0.099385	0.001025	0.001024	0.401228	0.667349	0.797339	1	0.605937	0.643808	0.726714	0.819857	0.990788	0.002047	0.194473	0.387922	0.619243	0.978506	0.614125	0.405738	0.004094	0.268168	0.515865	0.746162	0.995906	0.373593
0.263441	0.397849	0.33871	0.194595	0.205405	0.27027	0.016129	0.198925	0.5	0.688172	0.951613	0.010753	0.241935	0.473118	0.736559	0.994624	0.005376	0.258065	0.494624	0.795699	1	0.403226	0.306452	0.290323	0.097297	0.064865	0	0.005376	0.172043	0.516129	0.741935	1	0.123656	0.483871	0.61828	0.833333	0.994624	0.05914	0.215054	0.301075	0.451613	0.935484	0.575269	0.389189	0.021505	0.290323	0.483871	0.758065	0.989247	0.456989
0.301321	0.358944	0.339736	0.201923	0.194712	0.260817	0.003601	0.256903	0.537815	0.767107	0.995198	0.002401	0.234094	0.471789	0.735894	1	0.0012	0.247299	0.495798	0.747899	0.980792	0.382953	0.097239	0.519808	0.036058	0.084135	0.009615	0.0012	0.165666	0.466987	0.713085	1	0.022809	0.151261	0.40096	0.516206	0.973589	0.007203	0.301321	0.559424	0.783914	0.987995	0.626651	0.319712	0.007203	0.2497	0.469388	0.729892	0.979592	0.339736
0.347727	0.393182	0.259091	0.273349	0.182232	0.207289	0.006818	0.238636	0.479545	0.779545	0.995455	0.004545	0.245455	0.497727	0.722727	1	0.002273	0.247727	0.527273	0.738636	0.993182	0.568182	0.218182	0.213636	0.107062	0.052392	0.006834	0.002273	0.229545	0.390909	0.618182	1	0.015909	0.268182	0.529545	0.743182	0.997727	0.118182	0.584091	0.775	0.884091	0.981818	0.513636	0.378132	0.011364	0.320455	0.579545	0.759091	0.997727	0.388636
0.287711	0.502621	0.209668	0.276224	0.126457	0.198135	0.001747	0.199185	0.492137	0.75364	1	0.001165	0.279557	0.501456	0.77053	0.999418	0.000582	0.238206	0.502038	0.678509	0.998835	0.825859	0.030868	0.143273	0.018648	0.031469	0	0.000582	0.221899	0.428655	0.777519	1	0.035527	0.105999	0.472918	0.744321	0.998253	0.002912	0.52184	0.591147	0.681421	0.983692	0.32848	0.293706	0.003494	0.453116	0.604543	0.72452	0.998835	0.512522
0.37156	0.321101	0.307339	0.230415	0.211982	0.207373	0.013761	0.211009	0.5	0.756881	0.986239	0.009174	0.233945	0.477064	0.692661	1	0.004587	0.252294	0.513761	0.747706	0.990826	0.362385	0.316514	0.321101	0.087558	0.078341	0.004608	0.004587	0.137615	0.440367	0.775229	1	0.238532	0.344037	0.509174	0.862385	0.986239	0.045872	0.165138	0.490826	0.651376	0.90367	0.412844	0.414747	0.045872	0.256881	0.458716	0.802752	0.977064	0.316514
0.153061	0.540816	0.306122	0.154639	0.113402	0.309278	0.071429	0.214286	0.469388	0.683673	0.908163	0.010204	0.22449	0.438776	0.755102	0.989796	0.030612	0.244898	0.571429	0.744898	1	0.336735	0.061224	0.602041	0.061856	0.123711	0	0.010204	0.357143	0.438776	0.765306	1	0.020408	0.020408	0.744898	0.755102	0.836735	0.05102	0.183673	0.469388	0.632653	0.979592	0.5	0.515464	0.030612	0.285714	0.479592	0.744898	0.969388	0.581633
0.30033	0.359736	0.339934	0.215232	0.211921	0.254967	0.013201	0.181518	0.554455	0.775578	1	0.006601	0.231023	0.438944	0.676568	0.9967	0.0033	0.273927	0.508251	0.772277	0.976898	0.518152	0.30033	0.181518	0.119205	0.05298	0	0.0033	0.313531	0.481848	0.712871	1	0.009901	0.343234	0.613861	0.881188	0.976898	0.033003	0.072607	0.234323	0.541254	0.825083	0.547855	0.390728	0.009901	0.264026	0.49835	0.739274	0.976898	0.353135
0.267045	0.508523	0.224432	0.259259	0.139601	0.210826	0.017045	0.224432	0.571023	0.721591	0.997159	0.005682	0.272727	0.471591	0.744318	1	0.002841	0.173295	0.482955	0.752841	0.988636	0.778409	0.116477	0.105114	0.051282	0.02849	0	0.002841	0.309659	0.505682	0.75	1	0.008523	0.051136	0.144886	0.840909	0.931818	0.105114	0.1875	0.633523	0.698864	0.96875	0.392045	0.404558	0.008523	0.176136	0.514205	0.755682	0.988636	0.528409
0.234114	0.354515	0.411371	0.171141	0.154362	0.298658	0.006689	0.274247	0.508361	0.876254	1	0.010033	0.254181	0.555184	0.755853	0.979933	0.003344	0.22408	0.438127	0.675585	0.989967	0.317726	0.040134	0.64214	0.016779	0.07047	0.003356	0.003344	0.190635	0.548495	0.90301	1	0.314381	0.32107	0.468227	0.478261	0.926421	0.010033	0.247492	0.494983	0.695652	0.963211	0.685619	0.161074	0.013378	0.254181	0.474916	0.665552	0.973244	0.304348
0.245614	0.315789	0.438596	0.196429	0.196429	0.232143	0.035088	0.385965	0.596491	0.789474	0.982456	0.087719	0.315789	0.578947	0.77193	0.929825	0.017544	0.157895	0.280702	0.508772	1	0.473684	0.087719	0.438596	0.053571	0.053571	0.017857	0.017544	0.473684	0.596491	0.877193	1	0.052632	0.052632	0.385965	0.403509	0.438596	0.070175	0.157895	0.263158	0.631579	0.754386	0.561404	0.392857	0.052632	0.245614	0.403509	0.614035	0.964912	0.403509
0.230088	0.433628	0.336283	0.151786	0.196429	0.294643	0.017699	0.132743	0.575221	0.876106	1	0.035398	0.230088	0.460177	0.663717	0.973451	0.00885	0.283186	0.469027	0.699115	0.946903	0.371681	0.159292	0.469027	0.0625	0.044643	0.008929	0.00885	0.141593	0.238938	0.522124	1	0.026549	0.274336	0.318584	0.362832	0.902655	0.106195	0.504425	0.637168	0.752212	0.876106	0.619469	0.303571	0.026549	0.345133	0.530973	0.725664	0.946903	0.362832
0.391447	0.332237	0.276316	0.245267	0.230453	0.171193	0.004112	0.263158	0.555921	0.820724	0.997533	0.001645	0.266447	0.476974	0.712171	0.999178	0.000822	0.206414	0.464638	0.666118	1	0.458882	0.111842	0.429276	0.041975	0.069959	0.002469	0.000822	0.259868	0.435033	0.683388	1	0.007401	0.095395	0.495888	0.604441	0.654605	0.015625	0.241776	0.669408	0.851974	0.989309	0.430921	0.353909	0.003289	0.245066	0.470395	0.629934	0.996711	0.349507
0.193182	0.443182	0.363636	0.16092	0.137931	0.321839	0.022727	0.25	0.375	0.704545	0.977273	0.056818	0.261364	0.579545	0.806818	0.988636	0.011364	0.136364	0.477273	0.625	1	0.545455	0	0.454545	0	0.068966	0	0.011364	0.306818	0.727273	0.863636	1	0	0	0	0	0	0.034091	0.136364	0.431818	0.545455	0.659091	0.443182	0.206897	0.045455	0.136364	0.386364	0.590909	0.909091	0.511364
0.350877	0.321053	0.32807	0.212654	0.224956	0.212654	0.003509	0.25614	0.501754	0.721053	1	0.010526	0.273684	0.57193	0.814035	0.996491	0.001754	0.219298	0.442105	0.712281	0.985965	0.414035	0.098246	0.487719	0.042179	0.077329	0	0.001754	0.249123	0.485965	0.815789	1	0.040351	0.122807	0.305263	0.457895	0.935088	0.005263	0.287719	0.540351	0.684211	0.963158	0.503509	0.358524	0.005263	0.229825	0.424561	0.740351	0.989474	0.312281
0.406977	0.328488	0.264535	0.260553	0.195051	0.176128	0.00436	0.261628	0.468023	0.696221	1	0.002907	0.197674	0.484012	0.736919	0.997093	0.001453	0.334302	0.598837	0.792151	0.992733	0.505814	0.119186	0.375	0.053857	0.077147	0.007278	0.001453	0.184593	0.49564	0.786337	1	0.007267	0.132267	0.611919	0.694767	0.818314	0.031977	0.356105	0.478198	0.752907	0.994186	0.375	0.346434	0.007267	0.324128	0.639535	0.809593	0.992733	0.359012
0.336923	0.381538	0.281538	0.234206	0.172573	0.215716	0.009231	0.243077	0.492308	0.756923	0.998462	0.003077	0.215385	0.498462	0.750769	0.996923	0.001538	0.283077	0.5	0.713846	1	0.532308	0.201538	0.266154	0.084746	0.053929	0.001541	0.001538	0.2	0.513846	0.784615	1	0.004615	0.5	0.646154	0.878462	0.990769	0.015385	0.253846	0.390769	0.607692	0.781538	0.552308	0.348228	0.004615	0.275385	0.501538	0.709231	0.992308	0.407692
0.262195	0.323171	0.414634	0.208589	0.196319	0.306748	0.030488	0.317073	0.481707	0.670732	0.969512	0.018293	0.158537	0.408537	0.695122	0.993902	0.006098	0.280488	0.573171	0.835366	1	0.329268	0.164634	0.506098	0.055215	0.079755	0.042945	0.006098	0.256098	0.573171	0.664634	1	0.02439	0.182927	0.29878	0.835366	0.987805	0.04878	0.207317	0.463415	0.768293	0.97561	0.707317	0.319018	0.02439	0.25	0.5	0.77439	0.987805	0.317073
0.465517	0.16092	0.373563	0.156069	0.358382	0.132948	0.011494	0.258621	0.54023	0.747126	1	0.017241	0.189655	0.390805	0.568966	0.982759	0.005747	0.212644	0.488506	0.741379	0.994253	0.229885	0.022989	0.747126	0.011561	0.104046	0	0.005747	0.08046	0.425287	0.5	1	0.965517	0.965517	0.971264	0.977011	0.982759	0.017241	0.287356	0.551724	0.752874	0.954023	0.396552	0.508671	0.017241	0.270115	0.505747	0.741379	0.994253	0.143678
0.305556	0.438889	0.255556	0.251397	0.122905	0.206704	0.116667	0.322222	0.572222	0.861111	1	0.016667	0.194444	0.461111	0.705556	0.972222	0.005556	0.105556	0.377778	0.616667	0.983333	0.616667	0.061111	0.322222	0.027933	0.072626	0.005587	0.005556	0.227778	0.438889	0.633333	1	0.333333	0.338889	0.355556	0.383333	0.666667	0.033333	0.105556	0.766667	0.844444	0.983333	0.4	0.312849	0.022222	0.144444	0.388889	0.611111	0.922222	0.466667
0.287709	0.407821	0.304469	0.237762	0.176224	0.239161	0.005587	0.25838	0.506983	0.72486	0.993017	0.00419	0.261173	0.5	0.75	1	0.001397	0.21648	0.490223	0.755587	0.998603	0.480447	0.196927	0.322626	0.07972	0.074126	0.004196	0.001397	0.226257	0.488827	0.72067	1	0.074022	0.248603	0.473464	0.748603	0.972067	0.005587	0.319832	0.546089	0.821229	0.997207	0.664804	0.307692	0.002793	0.22067	0.47067	0.72067	0.997207	0.428771
0.367347	0.289796	0.342857	0.209016	0.217213	0.209016	0.016327	0.310204	0.526531	0.734694	0.97551	0.020408	0.167347	0.42449	0.742857	0.987755	0.004082	0.22449	0.502041	0.746939	1	0.383673	0.191837	0.42449	0.04918	0.098361	0	0.004082	0.208163	0.42449	0.804082	1	0.289796	0.640816	0.726531	0.906122	0.995918	0.008163	0.179592	0.379592	0.522449	0.869388	0.542857	0.418033	0.012245	0.191837	0.481633	0.746939	0.987755	0.277551
0.176101	0.355346	0.468553	0.154574	0.11041	0.328076	0.009434	0.188679	0.443396	0.738994	0.996855	0.006289	0.273585	0.518868	0.764151	1	0.003145	0.245283	0.484277	0.707547	0.993711	0.301887	0.09434	0.603774	0.031546	0.069401	0.006309	0.003145	0.194969	0.446541	0.751572	1	0.012579	0.327044	0.40566	0.537736	0.965409	0.059748	0.242138	0.509434	0.783019	0.993711	0.754717	0.157729	0.012579	0.261006	0.496855	0.742138	0.993711	0.323899
0.313953	0.363372	0.322674	0.198251	0.206997	0.244898	0.005814	0.264535	0.517442	0.831395	1	0.014535	0.212209	0.465116	0.665698	0.997093	0.002907	0.25	0.523256	0.758721	0.982558	0.331395	0.125	0.543605	0.052478	0.099125	0	0.002907	0.203488	0.447674	0.726744	1	0.008721	0.090116	0.290698	0.436047	0.956395	0.031977	0.331395	0.578488	0.793605	0.991279	0.671512	0.367347	0.011628	0.284884	0.514535	0.706395	0.982558	0.383721
0.31384	0.376218	0.309942	0.230469	0.203125	0.234375	0.007797	0.276803	0.51462	0.793372	0.994152	0.003899	0.212476	0.479532	0.701754	0.998051	0.001949	0.259259	0.493177	0.752437	1	0.481481	0.159844	0.358674	0.074219	0.074219	0.003906	0.001949	0.218324	0.407407	0.684211	1	0.007797	0.157895	0.356725	0.670565	0.935673	0.037037	0.461988	0.604288	0.844055	0.996101	0.614035	0.355469	0.009747	0.269006	0.502924	0.707602	0.980507	0.395712
0.288732	0.362676	0.348592	0.190813	0.226148	0.257951	0.007042	0.264085	0.528169	0.704225	0.957746	0.014085	0.257042	0.538732	0.788732	1	0.003521	0.193662	0.419014	0.676056	0.996479	0.464789	0.306338	0.228873	0.123675	0.031802	0.017668	0.003521	0.271127	0.489437	0.728873	1	0.035211	0.46831	0.697183	0.859155	0.992958	0.021127	0.080986	0.25	0.588028	0.647887	0.605634	0.360424	0.010563	0.267606	0.485915	0.746479	0.985915	0.288732
0.245283	0.399371	0.355346	0.201893	0.164038	0.299685	0.028302	0.235849	0.600629	0.77673	0.996855	0.009434	0.251572	0.471698	0.738994	1	0.003145	0.238994	0.465409	0.713836	0.993711	0.389937	0.141509	0.468553	0.063091	0.082019	0.006309	0.003145	0.27044	0.481132	0.738994	1	0.009434	0.289308	0.465409	0.694969	0.899371	0.050314	0.22956	0.5	0.761006	0.990566	0.610063	0.410095	0.009434	0.232704	0.465409	0.742138	0.993711	0.374214
0.398693	0.320261	0.281046	0.22623	0.216393	0.186885	0.006536	0.215686	0.424837	0.735294	1	0.019608	0.277778	0.496732	0.699346	0.996732	0.003268	0.281046	0.578431	0.794118	0.98366	0.640523	0.169935	0.189542	0.078689	0.059016	0	0.003268	0.245098	0.415033	0.735294	1	0.013072	0.522876	0.673203	0.800654	0.980392	0.058824	0.127451	0.54902	0.630719	0.954248	0.418301	0.4	0.013072	0.271242	0.571895	0.754902	0.98366	0.310458
0.315457	0.350158	0.334385	0.227848	0.240506	0.186709	0.012618	0.249211	0.507886	0.766562	0.993691	0.006309	0.287066	0.488959	0.722397	1	0.003155	0.236593	0.498423	0.744479	0.984227	0.413249	0.268139	0.318612	0.107595	0.06962	0	0.003155	0.223975	0.432177	0.684543	1	0.012618	0.173502	0.504732	0.70347	0.892744	0.066246	0.340694	0.574132	0.817035	0.990536	0.630915	0.373418	0.009464	0.268139	0.479495	0.735016	0.987382	0.388013
0.30916	0.389313	0.301527	0.23949	0.179618	0.244586	0.006361	0.256997	0.549618	0.762087	1	0.002545	0.279898	0.536896	0.773537	0.989822	0.001272	0.211196	0.403308	0.670483	0.997455	0.609415	0.094148	0.296438	0.036943	0.06242	0.003822	0.001272	0.253181	0.636132	0.821883	1	0.019084	0.10687	0.276081	0.451654	0.946565	0.012723	0.272265	0.428753	0.541985	0.996183	0.469466	0.371975	0.01145	0.225191	0.384224	0.619593	0.997455	0.436387
0.223301	0.368932	0.407767	0.127451	0.196078	0.284314	0.038835	0.126214	0.601942	0.825243	1	0.019417	0.368932	0.543689	0.76699	0.990291	0.009709	0.165049	0.349515	0.592233	0.980583	0.514563	0	0.485437	0	0.058824	0	0.009709	0.368932	0.737864	0.864078	1	0	0	0	0	0	0.019417	0.126214	0.252427	0.514563	0.640777	0.631068	0.352941	0.029126	0.213592	0.456311	0.640777	0.980583	0.378641
0.17931	0.368966	0.451724	0.148789	0.134948	0.349481	0.017241	0.241379	0.406897	0.596552	0.993103	0.031034	0.27931	0.531034	0.744828	0.996552	0.003448	0.227586	0.489655	0.803448	1	0.248276	0	0.751724	0	0.076125	0	0.003448	0.158621	0.513793	0.634483	1	0	0	0	0	0	0.010345	0.251724	0.496552	0.758621	0.97931	0.706897	0.214533	0.010345	0.22069	0.475862	0.713793	0.986207	0.331034
0.306011	0.360656	0.333333	0.236264	0.186813	0.236264	0.038251	0.311475	0.530055	0.781421	1	0.027322	0.234973	0.453552	0.666667	0.983607	0.005464	0.218579	0.497268	0.726776	0.994536	0.448087	0.333333	0.218579	0.120879	0.043956	0.010989	0.005464	0.20765	0.415301	0.688525	1	0.010929	0.147541	0.289617	0.814208	0.978142	0.448087	0.497268	0.617486	0.721311	0.983607	0.617486	0.307692	0.010929	0.229508	0.459016	0.699454	0.994536	0.387978
0.131944	0.444444	0.423611	0.118881	0.090909	0.356643	0.013889	0.118056	0.25	0.763889	0.965278	0.034722	0.243056	0.5	0.722222	0.993056	0.006944	0.319444	0.493056	0.75	1	0.326389	0	0.673611	0	0.083916	0	0.006944	0.076389	0.229167	0.541667	1	0	0	0	0	0	0.083333	0.388889	0.583333	0.756944	0.986111	0.722222	0.181818	0.076389	0.361111	0.576389	0.756944	0.979167	0.423611
0.322259	0.385382	0.292359	0.253333	0.18	0.25	0.009967	0.222591	0.465116	0.750831	0.990033	0.016611	0.262458	0.524917	0.747508	1	0.003322	0.259136	0.491694	0.727575	0.996678	0.259136	0.136213	0.604651	0.046667	0.046667	0	0.003322	0.295681	0.495017	0.667774	1	0.053156	0.332226	0.511628	0.644518	0.687708	0.006645	0.222591	0.48505	0.843854	0.996678	0.554817	0.413333	0.016611	0.252492	0.508306	0.787375	0.986711	0.385382
0.378109	0.313433	0.308458	0.26	0.24	0.205	0.014925	0.21393	0.462687	0.756219	0.975124	0.00995	0.18408	0.477612	0.666667	1	0.004975	0.313433	0.532338	0.781095	0.995025	0.447761	0.208955	0.343284	0.105	0.095	0.005	0.004975	0.174129	0.452736	0.651741	1	0.228856	0.437811	0.567164	0.681592	0.761194	0.024876	0.263682	0.383085	0.860697	0.970149	0.462687	0.36	0.0199	0.328358	0.507463	0.761194	0.955224	0.343284
0.285714	0.386905	0.327381	0.238806	0.18806	0.292537	0.011905	0.244048	0.502976	0.779762	1	0.005952	0.25	0.52381	0.732143	0.997024	0.002976	0.235119	0.464286	0.741071	0.991071	0.407738	0.175595	0.416667	0.092537	0.080597	0.002985	0.002976	0.232143	0.4375	0.708333	1	0.017857	0.235119	0.520833	0.738095	0.931548	0.026786	0.291667	0.559524	0.791667	0.994048	0.636905	0.316418	0.017857	0.28869	0.526786	0.75	0.994048	0.392857
0.301158	0.413127	0.285714	0.267442	0.151163	0.205426	0.023166	0.27027	0.552124	0.779923	0.996139	0.007722	0.216216	0.459459	0.683398	0.980695	0.003861	0.235521	0.501931	0.772201	1	0.718147	0.104247	0.177606	0.062016	0.046512	0	0.003861	0.293436	0.540541	0.737452	1	0.011583	0.235521	0.559846	0.92278	0.992278	0.042471	0.081081	0.389961	0.513514	0.88417	0.447876	0.348837	0.015444	0.177606	0.432432	0.752896	0.988417	0.46332
0.341463	0.368902	0.289634	0.232416	0.198777	0.262997	0.02439	0.283537	0.539634	0.731707	1	0.009146	0.219512	0.426829	0.740854	0.987805	0.003049	0.222561	0.512195	0.762195	0.996951	0.536585	0.073171	0.390244	0.042813	0.079511	0	0.003049	0.192073	0.393293	0.612805	1	0.131098	0.381098	0.503049	0.817073	0.984756	0.027439	0.29878	0.646341	0.77439	0.948171	0.472561	0.385321	0.021341	0.280488	0.545732	0.814024	0.987805	0.39939
0.31875	0.3375	0.34375	0.264151	0.251572	0.150943	0.0125	0.16875	0.43125	0.75	0.99375	0.01875	0.31875	0.5625	0.775	0.975	0.00625	0.225	0.39375	0.71875	1	0.35625	0.43125	0.2125	0.125786	0.037736	0	0.00625	0.28125	0.55625	0.78125	1	0.025	0.15625	0.3875	0.8375	0.99375	0.29375	0.3375	0.66875	0.71875	0.775	0.50625	0.402516	0.01875	0.21875	0.45625	0.7	0.9875	0.34375
0.29375	0.39375	0.3125	0.238994	0.18239	0.264151	0.06875	0.23125	0.4	0.61875	1	0.0125	0.275	0.525	0.76875	0.99375	0.00625	0.19375	0.53125	0.7375	0.95625	0.38125	0.15	0.46875	0.050314	0.062893	0	0.00625	0.25625	0.5125	0.71875	1	0.01875	0.05	0.2375	0.49375	0.68125	0.08125	0.325	0.55625	0.78125	0.95625	0.5125	0.352201	0.01875	0.325	0.58125	0.81875	0.95	0.3875
0.321429	0.3125	0.366071	0.147982	0.237668	0.237668	0.03125	0.334821	0.602679	0.78125	0.995536	0.013393	0.236607	0.464286	0.647321	0.96875	0.004464	0.15625	0.486607	0.741071	1	0.379464	0.004464	0.616071	0.008969	0.053812	0	0.004464	0.165179	0.392857	0.754464	1	0.352679	0.352679	0.352679	0.352679	0.352679	0.044643	0.272321	0.553571	0.732143	0.973214	0.549107	0.430493	0.013393	0.196429	0.486607	0.723214	0.977679	0.366071
0.391198	0.290954	0.317848	0.203431	0.240196	0.203431	0.00489	0.210269	0.454768	0.706601	1	0.007335	0.273839	0.525672	0.757946	0.982885	0.002445	0.268949	0.542787	0.779951	0.99511	0.572127	0.136919	0.290954	0.063725	0.068627	0	0.002445	0.234719	0.513447	0.762836	1	0.02934	0.188264	0.400978	0.589242	0.9022	0.04401	0.283619	0.537897	0.867971	0.99511	0.506112	0.343137	0.017115	0.283619	0.498778	0.745721	0.97555	0.310513
0.20524	0.449782	0.344978	0.179825	0.135965	0.307018	0.043668	0.244541	0.545852	0.759825	0.995633	0.008734	0.213974	0.436681	0.746725	1	0.004367	0.262009	0.50655	0.716157	0.978166	0.414847	0.165939	0.419214	0.057018	0.092105	0.004386	0.004367	0.270742	0.484716	0.737991	1	0.0131	0.152838	0.572052	0.71179	0.9869	0.065502	0.253275	0.524017	0.768559	0.969432	0.650655	0.307018	0.0131	0.253275	0.515284	0.716157	0.9869	0.471616
0.457593	0.287963	0.254444	0.264736	0.247459	0.145833	0.002031	0.312341	0.55612	0.775521	0.998984	0.001016	0.196546	0.426105	0.722194	0.998476	0.000508	0.226511	0.423565	0.721686	1	0.189436	0.056374	0.75419	0.024898	0.044207	0.002541	0.000508	0.105637	0.22905	0.330117	1	0.018791	0.058405	0.132047	0.23616	0.395632	0.002539	0.415439	0.608431	0.798375	0.997969	0.390046	0.448171	0.003555	0.18131	0.363636	0.6516	0.995429	0.315389
0.239645	0.47929	0.281065	0.216617	0.163205	0.267062	0.005917	0.266272	0.58284	0.784024	0.994083	0.026627	0.236686	0.505917	0.754438	1	0.002959	0.198225	0.446746	0.704142	0.961538	0.414201	0.162722	0.423077	0.068249	0.086053	0.002967	0.002959	0.272189	0.544379	0.763314	1	0.153846	0.201183	0.381657	0.553254	0.881657	0.008876	0.115385	0.523669	0.801775	0.961538	0.656805	0.350148	0.011834	0.248521	0.494083	0.698225	0.988166	0.494083
0.288	0.38	0.332	0.176707	0.196787	0.257028	0.012	0.196	0.488	0.732	1	0.008	0.28	0.44	0.748	0.988	0.004	0.232	0.524	0.744	0.992	0.412	0.116	0.472	0.052209	0.108434	0.004016	0.004	0.172	0.544	0.772	1	0.028	0.128	0.28	0.704	0.856	0.06	0.304	0.5	0.752	0.98	0.632	0.337349	0.02	0.232	0.452	0.712	0.992	0.356
0.414815	0.237037	0.348148	0.19403	0.328358	0.216418	0.02963	0.259259	0.518519	0.748148	0.985185	0.014815	0.251852	0.503704	0.77037	1	0.007407	0.207407	0.459259	0.711111	0.992593	0.348148	0.540741	0.111111	0.149254	0.029851	0	0.007407	0.192593	0.496296	0.681481	1	0.051852	0.37037	0.622222	0.814815	0.985185	0.125926	0.140741	0.207407	0.237037	0.266667	0.377778	0.626866	0.037037	0.244444	0.481481	0.792593	0.992593	0.303704
0.263158	0.380861	0.355981	0.186782	0.184866	0.27682	0.005742	0.267943	0.526316	0.747368	0.995215	0.001914	0.235407	0.522488	0.770335	0.998086	0.000957	0.24689	0.463158	0.71866	1	0.379904	0.141627	0.478469	0.045019	0.077586	0.002874	0.000957	0.266986	0.520574	0.742584	1	0.082297	0.402871	0.673684	0.76555	0.913876	0.004785	0.216268	0.380861	0.727273	0.97512	0.622967	0.310345	0.002871	0.244019	0.485167	0.77512	0.994258	0.380861
0.248424	0.411097	0.340479	0.20202	0.136364	0.282828	0.006305	0.247163	0.568726	0.791929	0.998739	0.002522	0.21942	0.474149	0.760404	0.997478	0.001261	0.283733	0.485498	0.688525	1	0.501892	0.064313	0.433796	0.030303	0.060606	0	0.001261	0.177806	0.455233	0.828499	1	0.042875	0.491803	0.746532	0.769231	0.929382	0.016393	0.325347	0.481715	0.655738	0.992434	0.562421	0.353535	0.008827	0.293821	0.479193	0.680958	0.994956	0.431274
0.292308	0.344231	0.363462	0.198459	0.219653	0.252408	0.005769	0.288462	0.498077	0.715385	1	0.007692	0.201923	0.492308	0.757692	0.996154	0.001923	0.255769	0.5	0.748077	0.998077	0.3	0.094231	0.605769	0.036609	0.086705	0.009634	0.001923	0.267308	0.521154	0.713462	1	0.042308	0.317308	0.482692	0.609615	0.969231	0.003846	0.226923	0.455769	0.788462	0.998077	0.628846	0.404624	0.003846	0.226923	0.501923	0.742308	0.996154	0.325
0.321888	0.381974	0.296137	0.219828	0.181034	0.228448	0.012876	0.180258	0.437768	0.751073	1	0.008584	0.240343	0.446352	0.72103	0.991416	0.004292	0.347639	0.600858	0.763948	0.987124	0.377682	0	0.622318	0	0.086207	0	0.004292	0.150215	0.266094	0.48927	1	0	0	0	0	0	0.021459	0.429185	0.626609	0.7897	0.991416	0.493562	0.327586	0.021459	0.386266	0.609442	0.802575	0.991416	0.390558
0.290698	0.406977	0.302326	0.226107	0.181818	0.249417	0.009302	0.248837	0.488372	0.769767	1	0.004651	0.251163	0.476744	0.744186	0.995349	0.002326	0.223256	0.509302	0.734884	0.993023	0.465116	0.172093	0.362791	0.053613	0.072261	0.006993	0.002326	0.132558	0.539535	0.867442	1	0.097674	0.262791	0.5	0.734884	0.855814	0.060465	0.327907	0.486047	0.623256	0.986047	0.576744	0.321678	0.006977	0.230233	0.434884	0.65814	0.981395	0.469767
0.301282	0.333333	0.365385	0.193548	0.206452	0.258065	0.025641	0.147436	0.570513	0.788462	0.948718	0.044872	0.24359	0.448718	0.74359	0.987179	0.00641	0.237179	0.455128	0.685897	1	0.358974	0.282051	0.358974	0.090323	0.077419	0.025806	0.00641	0.24359	0.621795	0.852564	1	0.025641	0.339744	0.429487	0.679487	0.980769	0.051282	0.134615	0.512821	0.602564	0.910256	0.551282	0.4	0.019231	0.269231	0.455128	0.679487	0.980769	0.314103
0.266667	0.442105	0.291228	0.295775	0.137324	0.246479	0.010526	0.22807	0.470175	0.782456	1	0.017544	0.238596	0.508772	0.750877	0.996491	0.003509	0.291228	0.484211	0.663158	0.989474	0.494737	0.119298	0.385965	0.052817	0.102113	0.017606	0.003509	0.178947	0.519298	0.803509	1	0.354386	0.484211	0.564912	0.824561	0.94386	0.049123	0.242105	0.396491	0.687719	0.898246	0.512281	0.380282	0.035088	0.298246	0.494737	0.680702	0.989474	0.484211
0.194611	0.365269	0.44012	0.153153	0.15015	0.381381	0.020958	0.260479	0.511976	0.787425	1	0.005988	0.269461	0.505988	0.715569	0.997006	0.002994	0.197605	0.467066	0.757485	0.991018	0.251497	0.083832	0.664671	0.021021	0.063063	0.009009	0.002994	0.257485	0.523952	0.805389	1	0.209581	0.242515	0.422156	0.949102	0.97006	0.020958	0.191617	0.479042	0.715569	0.916168	0.748503	0.192192	0.008982	0.236527	0.458084	0.721557	0.991018	0.353293
0.350242	0.345411	0.304348	0.222491	0.212817	0.199516	0.002415	0.254831	0.51087	0.741546	0.995169	0.007246	0.251208	0.492754	0.756039	1	0.001208	0.231884	0.502415	0.75	0.997585	0.495169	0.154589	0.350242	0.082225	0.072551	0.002418	0.001208	0.248792	0.5	0.68599	1	0.134058	0.301932	0.443237	0.614734	0.94686	0.004831	0.181159	0.706522	0.853865	0.997585	0.562802	0.360339	0.004831	0.263285	0.503623	0.774155	0.997585	0.381643
0.186047	0.318937	0.495017	0.11	0.143333	0.34	0.056478	0.255814	0.528239	0.664452	0.996678	0.006645	0.212625	0.48505	0.744186	1	0.003322	0.259136	0.475083	0.76412	0.993355	0.186047	0.039867	0.774086	0.016667	0.05	0.003333	0.003322	0.295681	0.548173	0.684385	1	0.581395	0.58804	0.611296	0.700997	0.710963	0.006645	0.232558	0.438538	0.780731	0.986711	0.724252	0.2	0.009967	0.255814	0.475083	0.747508	0.990033	0.265781
0.217712	0.450185	0.332103	0.181481	0.174074	0.274074	0.01476	0.291513	0.505535	0.726937	0.98155	0.01107	0.225092	0.520295	0.789668	1	0.00369	0.236162	0.468635	0.701107	0.99262	0.564576	0.295203	0.140221	0.162963	0.02963	0	0.00369	0.206642	0.490775	0.675277	1	0.173432	0.298893	0.498155	0.774908	0.940959	0.00738	0.0369	0.324723	0.948339	0.98524	0.601476	0.362963	0.01107	0.236162	0.490775	0.778598	0.98524	0.487085
0.333333	0.354167	0.3125	0.178947	0.252632	0.284211	0.020833	0.333333	0.5625	0.729167	1	0.0625	0.197917	0.479167	0.760417	0.979167	0.010417	0.135417	0.395833	0.6875	0.96875	0.510417	0.125	0.364583	0.063158	0.084211	0.021053	0.010417	0.260417	0.5625	0.770833	1	0.041667	0.489583	0.604167	0.6875	0.71875	0.0625	0.177083	0.34375	0.479167	0.9375	0.427083	0.526316	0.041667	0.145833	0.385417	0.666667	0.96875	0.385417
0.295455	0.342657	0.361888	0.2021	0.177603	0.255468	0.002622	0.266608	0.502622	0.776224	0.999126	0.001748	0.271853	0.475524	0.73514	1	0.000874	0.202797	0.519231	0.736014	0.997378	0.361888	0.128497	0.509615	0.038495	0.061242	0	0.000874	0.375	0.494755	0.812063	1	0.013986	0.282343	0.398601	0.907343	0.979021	0.045455	0.20542	0.518357	0.689685	0.957168	0.616259	0.265967	0.006119	0.202797	0.497378	0.73514	0.996503	0.352273
0.23516	0.520548	0.244292	0.21968	0.146453	0.26087	0.015982	0.315068	0.543379	0.762557	0.993151	0.004566	0.223744	0.472603	0.726027	0.997717	0.002283	0.246575	0.479452	0.783105	1	0.515982	0.212329	0.271689	0.06865	0.059497	0	0.002283	0.296804	0.573059	0.755708	1	0.210046	0.374429	0.787671	0.883562	0.997717	0.011416	0.114155	0.326484	0.511416	0.721461	0.589041	0.338673	0.006849	0.253425	0.454338	0.675799	0.995434	0.531963
0.280148	0.397032	0.32282	0.217472	0.224907	0.224907	0.009276	0.270872	0.491651	0.742115	0.962894	0.003711	0.233766	0.504638	0.755102	0.994434	0.001855	0.241187	0.493506	0.74026	1	0.734694	0.165121	0.100186	0.066914	0.033457	0.007435	0.001855	0.313544	0.595547	0.788497	1	0.046382	0.244898	0.304267	0.48423	0.814471	0.003711	0.025974	0.333952	0.526902	0.985158	0.541744	0.442379	0.005566	0.215213	0.439703	0.686456	0.996289	0.447124
0.232955	0.454545	0.3125	0.219373	0.128205	0.321937	0.005682	0.272727	0.588068	0.795455	0.991477	0.014205	0.258523	0.491477	0.744318	0.994318	0.002841	0.215909	0.417614	0.713068	1	0.375	0.15625	0.46875	0.051282	0.074074	0.005698	0.002841	0.346591	0.556818	0.818182	1	0.005682	0.053977	0.301136	0.40625	0.829545	0.088068	0.269886	0.525568	0.735795	0.985795	0.667614	0.347578	0.008523	0.241477	0.443182	0.710227	0.985795	0.440341
0.235149	0.477723	0.287129	0.198511	0.148883	0.265509	0.007426	0.277228	0.569307	0.762376	0.987624	0.00495	0.232673	0.465347	0.727723	1	0.002475	0.272277	0.497525	0.74505	0.980198	0.425743	0.25495	0.319307	0.081886	0.066998	0.01737	0.002475	0.220297	0.475248	0.787129	1	0.014851	0.136139	0.455446	0.814356	0.985149	0.007426	0.344059	0.534653	0.685644	0.977723	0.618812	0.342432	0.009901	0.227723	0.487624	0.712871	0.99505	0.544554
0.367021	0.265957	0.367021	0.165775	0.245989	0.187166	0.069149	0.297872	0.547872	0.776596	1	0.031915	0.159574	0.420213	0.659574	0.989362	0.005319	0.218085	0.473404	0.728723	0.984043	0.335106	0.12766	0.537234	0.048128	0.080214	0.005348	0.005319	0.223404	0.404255	0.696809	1	0.010638	0.143617	0.388298	0.478723	0.734043	0.069149	0.31383	0.611702	0.81383	0.957447	0.542553	0.417112	0.010638	0.170213	0.457447	0.664894	0.984043	0.303191
0.243956	0.345055	0.410989	0.156388	0.147577	0.314978	0.013187	0.178022	0.567033	0.742857	0.978022	0.004396	0.281319	0.487912	0.70989	0.997802	0.002198	0.250549	0.459341	0.795604	1	0.454945	0.015385	0.52967	0.013216	0.048458	0	0.002198	0.184615	0.589011	0.703297	1	0.008791	0.008791	0.410989	0.457143	0.461538	0.105495	0.246154	0.474725	0.830769	0.993407	0.523077	0.185022	0.004396	0.23956	0.393407	0.832967	0.995604	0.336264
0.276624	0.4501	0.273275	0.245979	0.158847	0.218499	0.002679	0.244474	0.476892	0.730074	0.996651	0.00134	0.300737	0.539183	0.780308	1	0.00067	0.200938	0.45211	0.705291	0.997991	0.622237	0.345613	0.03215	0.121314	0.006032	0.002011	0.00067	0.300067	0.569993	0.813128	1	0.006698	0.180174	0.374414	0.572672	0.96919	0.002679	0.841259	0.917616	0.989953	0.997991	0.425318	0.398123	0.002009	0.249833	0.505693	0.77428	0.997991	0.455459
0.360656	0.360656	0.278689	0.231405	0.14876	0.206612	0.02459	0.262295	0.491803	0.877049	0.983607	0.016393	0.204918	0.459016	0.688525	1	0.008197	0.270492	0.557377	0.663934	0.909836	0.327869	0	0.672131	0	0.099174	0	0.008197	0.213115	0.704918	0.918033	1	0	0	0	0	0	0.04918	0.254098	0.442623	0.655738	0.901639	0.418033	0.297521	0.04918	0.254098	0.442623	0.647541	0.868852	0.409836
0.355769	0.346154	0.298077	0.23301	0.23301	0.135922	0.076923	0.307692	0.461538	0.730769	0.990385	0.019231	0.240385	0.490385	0.644231	0.971154	0.009615	0.144231	0.509615	0.836538	1	0.346154	0.259615	0.394231	0.097087	0.07767	0	0.009615	0.201923	0.423077	0.605769	1	0.038462	0.115385	0.221154	0.451923	0.567308	0.298077	0.625	0.721154	0.846154	0.971154	0.451923	0.330097	0.038462	0.153846	0.336538	0.605769	0.951923	0.288462
0.432927	0.231707	0.335366	0.171779	0.288344	0.171779	0.012195	0.237805	0.45122	0.70122	1	0.018293	0.243902	0.567073	0.737805	0.969512	0.006098	0.176829	0.493902	0.756098	0.993902	0.371951	0.073171	0.554878	0.03681	0.08589	0	0.006098	0.432927	0.731707	0.871951	1	0.780488	0.792683	0.829268	0.932927	0.95122	0.018293	0.164634	0.335366	0.52439	0.920732	0.481707	0.368098	0.018293	0.176829	0.493902	0.682927	0.957317	0.219512
0.386383	0.318298	0.295319	0.245315	0.231687	0.194208	0.002553	0.26383	0.53617	0.806809	0.995745	0.001702	0.265532	0.486809	0.719149	0.998298	0.000851	0.217021	0.466383	0.69617	1	0.442553	0.114894	0.442553	0.045145	0.075809	0.002555	0.000851	0.242553	0.434043	0.627234	1	0.018723	0.097872	0.553191	0.654468	0.999149	0.011915	0.251915	0.625532	0.88	0.994043	0.44	0.359455	0.005957	0.24766	0.501277	0.666383	0.993191	0.333617
0.323442	0.403561	0.272997	0.321429	0.169643	0.22619	0.005935	0.305638	0.501484	0.735905	1	0.023739	0.249258	0.48368	0.74184	0.997033	0.002967	0.186944	0.510386	0.765579	0.994065	0.436202	0.124629	0.439169	0.053571	0.071429	0	0.002967	0.31454	0.4273	0.72997	1	0.071217	0.142433	0.302671	0.744807	0.908012	0.005935	0.243323	0.590504	0.78635	0.994065	0.480712	0.386905	0.011869	0.192878	0.52819	0.750742	0.994065	0.388724
0.304348	0.374224	0.321429	0.230171	0.18507	0.255054	0.01087	0.290373	0.504658	0.774845	1	0.003106	0.229814	0.481366	0.73913	0.993789	0.001553	0.223602	0.507764	0.742236	0.996894	0.562112	0.231366	0.206522	0.090202	0.037325	0.006221	0.001553	0.267081	0.51087	0.762422	1	0.052795	0.18323	0.32764	0.450311	0.917702	0.004658	0.588509	0.641304	0.864907	0.996894	0.523292	0.385692	0.006211	0.206522	0.484472	0.708075	0.992236	0.369565
0.420382	0.33758	0.242038	0.223642	0.204473	0.182109	0.006369	0.299363	0.522293	0.732484	0.996815	0.009554	0.136943	0.353503	0.694268	1	0.003185	0.347134	0.570064	0.799363	0.990446	0.369427	0.015924	0.61465	0.009585	0.111821	0.003195	0.003185	0.095541	0.509554	0.808917	1	0.783439	0.783439	0.786624	0.789809	0.815287	0.019108	0.286624	0.474522	0.675159	0.977707	0.452229	0.389776	0.044586	0.296178	0.547771	0.799363	0.990446	0.353503
0.185714	0.357143	0.457143	0.144928	0.173913	0.26087	0.085714	0.171429	0.314286	0.628571	0.957143	0.057143	0.242857	0.585714	0.8	0.942857	0.014286	0.271429	0.5	0.657143	1	0.471429	0.2	0.328571	0.072464	0.043478	0.072464	0.014286	0.271429	0.714286	0.828571	1	0.042857	0.071429	0.128571	0.214286	0.914286	0.357143	0.442857	0.528571	0.614286	0.9	0.614286	0.492754	0.042857	0.342857	0.542857	0.742857	0.971429	0.357143
0.419825	0.294461	0.285714	0.236842	0.24269	0.219298	0.008746	0.189504	0.539359	0.813411	0.991254	0.005831	0.259475	0.446064	0.688047	0.994169	0.002915	0.285714	0.521866	0.728863	1	0.632653	0.090379	0.276968	0.061404	0.102339	0.002924	0.002915	0.297376	0.495627	0.71137	1	0.212828	0.341108	0.466472	0.658892	0.804665	0.011662	0.125364	0.501458	0.865889	0.991254	0.349854	0.526316	0.020408	0.300292	0.536443	0.74344	0.979592	0.314869
0.333333	0.315315	0.351351	0.163636	0.145455	0.290909	0.018018	0.117117	0.522523	0.630631	0.981982	0.054054	0.243243	0.387387	0.693694	0.990991	0.009009	0.279279	0.531532	0.846847	1	0.342342	0.099099	0.558559	0.018182	0.090909	0.018182	0.009009	0.234234	0.396396	0.810811	1	0.261261	0.27027	0.297297	0.432432	0.459459	0.027027	0.189189	0.567568	0.747748	0.90991	0.477477	0.309091	0.036036	0.306306	0.495495	0.792793	0.972973	0.279279
0.267352	0.401028	0.33162	0.234536	0.18299	0.260309	0.005141	0.300771	0.511568	0.750643	0.989717	0.007712	0.200514	0.455013	0.70437	0.997429	0.002571	0.244216	0.508997	0.804627	1	0.573265	0.339332	0.087404	0.123711	0.025773	0.005155	0.002571	0.254499	0.48329	0.735219	1	0.203085	0.398458	0.609254	0.820051	0.997429	0.082262	0.100257	0.143959	0.169666	0.956298	0.619537	0.278351	0.069409	0.308483	0.529563	0.745501	0.994859	0.390746
0.294278	0.354223	0.351499	0.180328	0.202186	0.262295	0.013624	0.26703	0.482289	0.743869	0.99455	0.00545	0.231608	0.487738	0.735695	0.997275	0.002725	0.237057	0.523161	0.760218	1	0.487738	0.414169	0.098093	0.131148	0.016393	0	0.002725	0.269755	0.525886	0.741144	1	0.144414	0.356948	0.572207	0.80109	0.986376	0.013624	0.035422	0.06812	0.092643	0.125341	0.613079	0.311475	0.008174	0.291553	0.504087	0.72752	0.989101	0.354223
0.397727	0.335227	0.267045	0.239316	0.250712	0.165242	0.008523	0.278409	0.508523	0.730114	0.997159	0.011364	0.204545	0.497159	0.8125	0.991477	0.002841	0.235795	0.480114	0.693182	1	0.377841	0.059659	0.5625	0.02849	0.034188	0.011396	0.002841	0.627841	0.775568	0.869318	1	0.613636	0.659091	0.690341	0.909091	0.931818	0.005682	0.207386	0.349432	0.488636	0.928977	0.372159	0.421652	0.014205	0.267045	0.545455	0.696023	0.982955	0.383523
0.155172	0.310345	0.534483	0.104348	0.104348	0.286957	0.224138	0.267241	0.37069	0.594828	0.974138	0.034483	0.327586	0.517241	0.793103	1	0.008621	0.146552	0.508621	0.689655	0.991379	0.353448	0	0.646552	0	0.069565	0	0.008621	0.301724	0.387931	0.663793	1	0	0	0	0	0	0.025862	0.172414	0.543103	0.775862	0.939655	0.534483	0.347826	0.025862	0.241379	0.5	0.681034	0.965517	0.318966
0.109677	0.354839	0.535484	0.090909	0.11039	0.376623	0.129032	0.451613	0.625806	0.722581	1	0.032258	0.225806	0.490323	0.787097	0.993548	0.006452	0.193548	0.425806	0.735484	0.987097	0.290323	0.006452	0.703226	0.012987	0.077922	0	0.006452	0.458065	0.612903	0.703226	1	0.619355	0.619355	0.619355	0.619355	0.619355	0.019355	0.212903	0.393548	0.806452	0.987097	0.670968	0.233766	0.019355	0.193548	0.516129	0.741935	0.987097	0.316129
0.378613	0.32948	0.291908	0.26087	0.211594	0.191304	0.017341	0.254335	0.471098	0.719653	1	0.00578	0.184971	0.49711	0.702312	0.99422	0.00289	0.274566	0.528902	0.780347	0.991329	0.303468	0.00578	0.690751	0.008696	0.118841	0.002899	0.00289	0.205202	0.537572	0.716763	1	0.725434	0.725434	0.725434	0.725434	0.742775	0.008671	0.251445	0.482659	0.768786	0.991329	0.560694	0.423188	0.008671	0.300578	0.543353	0.789017	0.991329	0.361272
0.34585	0.337945	0.316206	0.225743	0.229703	0.239604	0.007905	0.272727	0.511858	0.778656	0.992095	0.003953	0.187747	0.460474	0.749012	1	0.001976	0.245059	0.509881	0.737154	0.998024	0.357708	0.090909	0.551383	0.043564	0.10297	0.007921	0.001976	0.183794	0.458498	0.699605	1	0.013834	0.136364	0.229249	0.492095	0.66996	0.045455	0.335968	0.551383	0.812253	0.992095	0.596838	0.392079	0.005929	0.237154	0.486166	0.747036	0.994071	0.320158
0.288571	0.382857	0.328571	0.201717	0.184549	0.238913	0.008571	0.237143	0.497143	0.741429	0.998571	0.002857	0.274286	0.52	0.755714	0.997143	0.001429	0.214286	0.464286	0.745714	1	0.378571	0.085714	0.535714	0.037196	0.082976	0	0.001429	0.181429	0.36	0.677143	1	0.17	0.247143	0.295714	0.347143	0.93	0.03	0.447143	0.601429	0.804286	0.997143	0.641429	0.320458	0.004286	0.268571	0.508571	0.73	0.994286	0.384286
0.267218	0.347107	0.385675	0.151934	0.234807	0.254144	0.011019	0.261708	0.4573	0.713499	0.99449	0.00551	0.146006	0.421488	0.69146	1	0.002755	0.316804	0.578512	0.779614	0.997245	0.53719	0.258953	0.203857	0.09116	0.058011	0.002762	0.002755	0.14876	0.476584	0.749311	1	0.082645	0.534435	0.705234	0.834711	0.972452	0.140496	0.206612	0.305785	0.410468	0.933884	0.512397	0.40884	0.033058	0.294766	0.548209	0.754821	0.975207	0.366391
0.322581	0.41129	0.266129	0.238866	0.153846	0.230769	0.008065	0.310484	0.540323	0.778226	1	0.024194	0.21371	0.475806	0.693548	0.983871	0.004032	0.185484	0.467742	0.721774	0.991935	0.383065	0.024194	0.592742	0.004049	0.117409	0.012146	0.004032	0.197581	0.41129	0.616935	1	0.020161	0.020161	0.028226	0.032258	0.084677	0.012097	0.322581	0.572581	0.802419	0.991935	0.685484	0.331984	0.020161	0.254032	0.532258	0.766129	0.979839	0.431452
0.340541	0.318919	0.340541	0.190217	0.201087	0.23913	0.027027	0.237838	0.475676	0.686486	0.972973	0.010811	0.32973	0.605405	0.816216	1	0.005405	0.172973	0.437838	0.659459	0.994595	0.416216	0.2	0.383784	0.054348	0.076087	0	0.005405	0.286486	0.513514	0.778378	1	0.075676	0.227027	0.383784	0.545946	0.735135	0.016216	0.189189	0.583784	0.864865	0.972973	0.540541	0.336957	0.016216	0.243243	0.508108	0.745946	0.978378	0.313514
0.168	0.336	0.496	0.137097	0.137097	0.379032	0.024	0.08	0.272	0.52	0.848	0.016	0.168	0.36	0.672	0.96	0.008	0.368	0.584	0.8	1	0.248	0.024	0.728	0.016129	0.048387	0	0.008	0.056	0.12	0.44	1	0.152	0.152	0.152	0.16	0.168	0.2	0.368	0.584	0.768	0.992	0.72	0.209677	0.064	0.296	0.512	0.688	0.928	0.336
0.390501	0.229551	0.379947	0.169312	0.285714	0.174603	0.005277	0.229551	0.474934	0.741425	0.994723	0.039578	0.253298	0.511873	0.699208	0.986807	0.002639	0.266491	0.498681	0.759894	1	0.337731	0.102902	0.559367	0.044974	0.07672	0.007937	0.002639	0.208443	0.432718	0.691293	1	0.063325	0.14248	0.411609	0.588391	0.941953	0.015831	0.300792	0.559367	0.762533	0.997361	0.51715	0.433862	0.007916	0.240106	0.493404	0.691293	0.989446	0.248021
0.363203	0.303146	0.333651	0.216603	0.236641	0.187977	0.00286	0.246902	0.506196	0.755958	1	0.003813	0.224023	0.486177	0.760724	0.99142	0.000953	0.279314	0.49857	0.732126	0.99714	0.368923	0.120114	0.510963	0.042939	0.08874	0.008588	0.000953	0.224023	0.445186	0.689228	1	0.015253	0.135367	0.320305	0.479504	0.966635	0.00286	0.332698	0.577693	0.800763	0.99714	0.534795	0.406489	0.003813	0.257388	0.477598	0.738799	0.99714	0.310772
0.357143	0.285714	0.357143	0.156627	0.361446	0.180723	0.035714	0.27381	0.511905	0.714286	1	0.02381	0.119048	0.547619	0.880952	0.964286	0.011905	0.25	0.47619	0.72619	0.988095	0.333333	0.119048	0.547619	0.024096	0.048193	0.024096	0.011905	0.083333	0.52381	0.916667	1	0.154762	0.166667	0.202381	0.833333	0.869048	0.22619	0.357143	0.5	0.678571	0.821429	0.452381	0.481928	0.047619	0.166667	0.357143	0.571429	0.869048	0.321429
0.479554	0.286245	0.234201	0.227612	0.223881	0.123134	0.022305	0.245353	0.527881	0.821561	1	0.007435	0.167286	0.475836	0.665428	0.962825	0.003717	0.282528	0.442379	0.66171	0.925651	0.561338	0.126394	0.312268	0.044776	0.052239	0	0.003717	0.408922	0.639405	0.858736	1	0.416357	0.468401	0.535316	0.64684	0.843866	0.100372	0.174721	0.252788	0.356877	0.806691	0.356877	0.365672	0.048327	0.29368	0.472119	0.724907	0.95539	0.349442
0.287634	0.397849	0.314516	0.188679	0.202156	0.264151	0.024194	0.217742	0.475806	0.706989	1	0.005376	0.255376	0.502688	0.771505	0.991935	0.002688	0.258065	0.518817	0.733871	0.994624	0.446237	0.182796	0.370968	0.06469	0.091644	0.005391	0.002688	0.209677	0.513441	0.75	1	0.010753	0.201613	0.526882	0.744624	0.849462	0.026882	0.260753	0.41129	0.704301	0.994624	0.615591	0.339623	0.010753	0.287634	0.483871	0.736559	0.981183	0.419355
0.316327	0.326531	0.357143	0.185567	0.185567	0.226804	0.040816	0.316327	0.602041	0.755102	0.989796	0.020408	0.22449	0.438776	0.673469	0.979592	0.010204	0.153061	0.428571	0.72449	1	0.540816	0.142857	0.316327	0.082474	0.082474	0.020619	0.010204	0.408163	0.561224	0.77551	1	0.255102	0.540816	0.785714	0.816327	0.969388	0.020408	0.081633	0.163265	0.336735	0.612245	0.459184	0.371134	0.05102	0.22449	0.459184	0.653061	0.969388	0.418367
0.295732	0.411585	0.292683	0.235474	0.17737	0.244648	0.003049	0.243902	0.521341	0.777439	0.996951	0.012195	0.277439	0.484756	0.728659	1	0.009146	0.237805	0.496951	0.737805	0.984756	0.5	0.405488	0.094512	0.2263	0.024465	0	0.003049	0.243902	0.490854	0.795732	1	0.033537	0.304878	0.545732	0.759146	0.978659	0.20122	0.22561	0.32622	0.35061	0.594512	0.54878	0.391437	0.009146	0.271341	0.542683	0.77439	0.984756	0.445122
0.454412	0.286765	0.258824	0.251841	0.260677	0.14433	0.002941	0.282353	0.525	0.742647	0.998529	0.007353	0.163235	0.485294	0.766176	1	0.001471	0.241176	0.464706	0.719118	0.994118	0.177941	0.045588	0.776471	0.019146	0.007364	0.001473	0.001471	0.063235	0.129412	0.954412	1	0.016176	0.032353	0.072059	0.083824	0.144118	0.048529	0.354412	0.548529	0.742647	0.942647	0.301471	0.483063	0.014706	0.255882	0.547059	0.805882	0.994118	0.326471
0.194313	0.554502	0.251185	0.247619	0.085714	0.309524	0.009479	0.222749	0.526066	0.739336	0.933649	0.018957	0.28436	0.49763	0.725118	1	0.004739	0.161137	0.445498	0.748815	0.990521	0.327014	0.526066	0.146919	0.119048	0.033333	0.004762	0.004739	0.146919	0.421801	0.625592	1	0.156398	0.336493	0.587678	0.739336	0.990521	0.009479	0.037915	0.184834	0.824645	0.862559	0.521327	0.4	0.014218	0.260664	0.49763	0.748815	0.990521	0.516588
0.28	0.431429	0.288571	0.25788	0.183381	0.266476	0.011429	0.282857	0.505714	0.665714	0.965714	0.008571	0.242857	0.548571	0.811429	1	0.002857	0.211429	0.442857	0.702857	0.994286	0.44	0.125714	0.434286	0.051576	0.097421	0	0.002857	0.217143	0.468571	0.728571	1	0.125714	0.28	0.48	0.688571	0.897143	0.005714	0.3	0.537143	0.791429	0.994286	0.62	0.395415	0.005714	0.234286	0.485714	0.762857	0.991429	0.451429
0.174905	0.357414	0.467681	0.087786	0.125954	0.40458	0.095057	0.235741	0.593156	0.760456	0.988593	0.007605	0.224335	0.463878	0.722433	1	0.003802	0.250951	0.494297	0.752852	0.996198	0.171103	0	0.828897	0	0.061069	0	0.003802	0.212928	0.43346	0.612167	1	0	0	0	0	0	0.011407	0.269962	0.524715	0.760456	0.996198	0.787072	0.160305	0.011407	0.250951	0.490494	0.73384	0.992395	0.319392
0.272549	0.309804	0.417647	0.172888	0.212181	0.237721	0.009804	0.205882	0.405882	0.74902	0.994118	0.003922	0.254902	0.480392	0.72549	1	0.001961	0.268627	0.541176	0.764706	0.992157	0.341176	0.219608	0.439216	0.084479	0.049116	0.009823	0.001961	0.196078	0.329412	0.641176	1	0.011765	0.123529	0.264706	0.370588	0.764706	0.005882	0.521569	0.680392	0.872549	0.990196	0.684314	0.220039	0.005882	0.278431	0.523529	0.754902	0.992157	0.317647
0.349754	0.315271	0.334975	0.207921	0.227723	0.237624	0.014778	0.310345	0.517241	0.773399	0.985222	0.039409	0.197044	0.46798	0.738916	0.995074	0.004926	0.206897	0.433498	0.699507	1	0.280788	0.1133	0.605911	0.049505	0.118812	0.009901	0.004926	0.147783	0.37931	0.743842	1	0.019704	0.039409	0.566502	0.660099	0.990148	0.083744	0.285714	0.482759	0.773399	0.975369	0.546798	0.425743	0.009852	0.172414	0.458128	0.674877	0.995074	0.295567
0.31686	0.313953	0.369186	0.186589	0.250729	0.218659	0.005814	0.197674	0.508721	0.726744	0.982558	0.014535	0.258721	0.5	0.81686	1	0.002907	0.255814	0.491279	0.703488	0.994186	0.424419	0.063953	0.511628	0.020408	0.084548	0.008746	0.002907	0.340116	0.642442	0.857558	1	0.366279	0.776163	0.828488	0.962209	0.985465	0.023256	0.215116	0.398256	0.59593	0.979651	0.572674	0.344023	0.026163	0.252907	0.468023	0.668605	0.994186	0.360465
0.295775	0.373239	0.330986	0.234043	0.205674	0.297872	0.014085	0.316901	0.570423	0.767606	0.992958	0.042254	0.232394	0.521127	0.732394	1	0.007042	0.161972	0.373239	0.661972	0.985915	0.43662	0.211268	0.352113	0.099291	0.070922	0	0.007042	0.288732	0.647887	0.795775	1	0.204225	0.521127	0.746479	0.823944	0.93662	0.035211	0.112676	0.34507	0.450704	0.964789	0.5	0.425532	0.021127	0.133803	0.316901	0.577465	0.971831	0.429577
0.331378	0.334311	0.334311	0.214706	0.267647	0.229412	0.005865	0.196481	0.442815	0.703812	0.991202	0.008798	0.252199	0.495601	0.727273	1	0.002933	0.290323	0.554252	0.794721	0.997067	0.392962	0.193548	0.41349	0.070588	0.076471	0.005882	0.002933	0.351906	0.501466	0.785924	1	0.296188	0.554252	0.636364	0.768328	0.912023	0.005865	0.1261	0.240469	0.659824	0.994135	0.580645	0.382353	0.014663	0.390029	0.59824	0.777126	0.994135	0.378299
0.351163	0.32093	0.327907	0.228438	0.2331	0.223776	0.004651	0.218605	0.47907	0.732558	0.997674	0.009302	0.276744	0.513953	0.739535	0.981395	0.002326	0.253488	0.495349	0.753488	1	0.432558	0.172093	0.395349	0.09324	0.074592	0.004662	0.002326	0.227907	0.553488	0.806977	1	0.067442	0.183721	0.583721	0.869767	0.95814	0.006977	0.276744	0.437209	0.681395	0.995349	0.602326	0.41958	0.006977	0.260465	0.523256	0.748837	0.995349	0.32093
0.320988	0.382716	0.296296	0.2375	0.1625	0.2125	0.024691	0.382716	0.580247	0.790123	0.975309	0.049383	0.234568	0.45679	0.814815	0.987654	0.012346	0.160494	0.308642	0.592593	1	0.592593	0.197531	0.209877	0.05	0.05	0	0.012346	0.432099	0.691358	0.851852	1	0.061728	0.098765	0.54321	0.592593	0.641975	0.160494	0.197531	0.246914	0.296296	0.765432	0.419753	0.325	0.049383	0.135802	0.271605	0.469136	0.814815	0.358025
0.165138	0.376147	0.458716	0.111111	0.092593	0.407407	0.155963	0.229358	0.495413	0.706422	0.788991	0.045872	0.238532	0.486239	0.66055	0.972477	0.009174	0.183486	0.46789	0.798165	1	0.247706	0.100917	0.651376	0.027778	0.083333	0.009259	0.009174	0.238532	0.46789	0.59633	1	0.027523	0.036697	0.06422	0.53211	0.559633	0.073394	0.293578	0.623853	0.816514	0.981651	0.706422	0.185185	0.018349	0.192661	0.422018	0.642202	0.93578	0.33945
0.278261	0.411594	0.310145	0.203488	0.171512	0.261628	0.028986	0.388406	0.637681	0.797101	1	0.005797	0.226087	0.455072	0.721739	0.976812	0.002899	0.194203	0.405797	0.652174	0.997101	0.295652	0.04058	0.663768	0.017442	0.087209	0	0.002899	0.376812	0.747826	0.843478	1	0.365217	0.371014	0.605797	0.846377	0.857971	0.005797	0.194203	0.428986	0.594203	0.991304	0.655072	0.313953	0.008696	0.197101	0.391304	0.608696	0.965217	0.391304
0.236686	0.461538	0.301775	0.190476	0.190476	0.214286	0.023669	0.284024	0.615385	0.745562	0.970414	0.017751	0.195266	0.443787	0.816568	0.988166	0.005917	0.260355	0.455621	0.698225	1	0.52071	0.16568	0.313609	0.071429	0.035714	0.011905	0.005917	0.207101	0.43787	0.840237	1	0.035503	0.071006	0.218935	0.585799	0.988166	0.272189	0.47929	0.556213	0.686391	0.863905	0.508876	0.404762	0.029586	0.183432	0.372781	0.639053	0.982249	0.420118
0.265789	0.431579	0.302632	0.224274	0.166227	0.274406	0.065789	0.284211	0.497368	0.747368	0.992105	0.005263	0.223684	0.492105	0.763158	1	0.002632	0.244737	0.494737	0.734211	0.989474	0.536842	0.052632	0.410526	0.068602	0.08971	0.005277	0.002632	0.365789	0.581579	0.85	1	0.394737	0.557895	0.647368	0.692105	0.926316	0.005263	0.165789	0.336842	0.597368	0.886842	0.55	0.379947	0.007895	0.242105	0.463158	0.692105	0.994737	0.510526
0.100962	0.495192	0.403846	0.101449	0.062802	0.415459	0.192308	0.413462	0.567308	0.663462	0.971154	0.019231	0.25	0.528846	0.769231	1	0.004808	0.197115	0.456731	0.735577	0.990385	0.245192	0.033654	0.721154	0.014493	0.05314	0.004831	0.004808	0.221154	0.413462	0.913462	1	0.009615	0.009615	0.019231	0.028846	0.192308	0.0625	0.269231	0.519231	0.75	0.975962	0.764423	0.222222	0.009615	0.245192	0.509615	0.774038	0.980769	0.485577
0.313158	0.326316	0.360526	0.192612	0.224274	0.253298	0.005263	0.265789	0.481579	0.836842	0.997368	0.010526	0.223684	0.463158	0.689474	1	0.002632	0.239474	0.536842	0.763158	0.992105	0.284211	0.128947	0.586842	0.05277	0.08971	0	0.002632	0.25	0.45	0.668421	1	0.005263	0.228947	0.315789	0.589474	0.760526	0.034211	0.265789	0.557895	0.797368	0.994737	0.634211	0.358839	0.007895	0.234211	0.5	0.728947	0.992105	0.323684
0.27686	0.38843	0.334711	0.174274	0.178423	0.273859	0.041322	0.272727	0.508264	0.768595	1	0.008264	0.190083	0.466942	0.669421	0.995868	0.004132	0.280992	0.53719	0.752066	0.975207	0.429752	0.157025	0.413223	0.070539	0.070539	0.004149	0.004132	0.260331	0.471074	0.731405	1	0.012397	0.144628	0.495868	0.690083	0.830579	0.061983	0.326446	0.545455	0.772727	0.954545	0.607438	0.315353	0.012397	0.22314	0.487603	0.690083	0.987603	0.371901
0.281879	0.449664	0.268456	0.236486	0.182432	0.256757	0.080537	0.228188	0.503356	0.704698	0.979866	0.013423	0.255034	0.463087	0.744966	1	0.006711	0.241611	0.550336	0.771812	0.966443	0.483221	0.295302	0.221477	0.108108	0.067568	0	0.006711	0.241611	0.469799	0.671141	1	0.020134	0.107383	0.389262	0.496644	0.832215	0.221477	0.738255	0.798658	0.899329	0.986577	0.550336	0.405405	0.020134	0.241611	0.510067	0.751678	0.966443	0.436242
0.2	0.414815	0.385185	0.176252	0.111317	0.313544	0.024074	0.255556	0.47037	0.707407	1	0.003704	0.212963	0.472222	0.725926	0.996296	0.001852	0.277778	0.553704	0.77037	0.975926	0.309259	0.027778	0.662963	0.011132	0.081633	0.003711	0.001852	0.133333	0.512963	0.848148	1	0.053704	0.057407	0.57037	0.577778	0.774074	0.05	0.277778	0.488889	0.701852	0.981481	0.701852	0.148423	0.003704	0.251852	0.462963	0.724074	0.972222	0.414815
0.231884	0.39372	0.374396	0.16707	0.162228	0.276029	0.009662	0.297101	0.519324	0.719807	0.975845	0.021739	0.2343	0.536232	0.850242	1	0.002415	0.214976	0.451691	0.657005	0.997585	0.379227	0.096618	0.524155	0.031477	0.075061	0.031477	0.002415	0.277778	0.657005	0.891304	1	0.007246	0.289855	0.403382	0.748792	0.963768	0.019324	0.21256	0.427536	0.625604	0.92029	0.717391	0.285714	0.007246	0.236715	0.5	0.756039	0.990338	0.391304
0.34902	0.345098	0.305882	0.232283	0.216535	0.208661	0.007843	0.235294	0.537255	0.803922	0.996078	0.027451	0.25098	0.486275	0.709804	0.976471	0.003922	0.223529	0.505882	0.756863	1	0.443137	0.223529	0.333333	0.090551	0.066929	0.003937	0.003922	0.239216	0.486275	0.717647	1	0.007843	0.192157	0.466667	0.694118	0.996078	0.05098	0.364706	0.584314	0.756863	0.968627	0.596078	0.370079	0.011765	0.270588	0.494118	0.721569	0.988235	0.341176
0.377358	0.308176	0.314465	0.253165	0.221519	0.21519	0.018868	0.226415	0.415094	0.666667	1	0.012579	0.320755	0.528302	0.779874	0.993711	0.006289	0.201258	0.503145	0.698113	0.987421	0.383648	0.18239	0.433962	0.044304	0.056962	0.006329	0.006289	0.238994	0.484277	0.798742	1	0.018868	0.056604	0.27673	0.446541	0.559748	0.132075	0.314465	0.610063	0.735849	0.899371	0.515723	0.329114	0.025157	0.283019	0.534591	0.72956	0.987421	0.320755
0.245833	0.479167	0.275	0.1841	0.1841	0.251046	0.008333	0.291667	0.570833	0.825	0.995833	0.0125	0.204167	0.466667	0.683333	0.991667	0.004167	0.195833	0.479167	0.770833	1	0.55	0.379167	0.070833	0.100418	0.008368	0	0.004167	0.245833	0.479167	0.729167	1	0.158333	0.408333	0.616667	0.804167	0.995833	0.0125	0.025	0.041667	0.058333	0.079167	0.708333	0.276151	0.0125	0.216667	0.4875	0.725	0.991667	0.479167
0.29386	0.390351	0.315789	0.198238	0.180617	0.273128	0.057018	0.27193	0.54386	0.802632	0.995614	0.013158	0.210526	0.495614	0.75	1	0.004386	0.22807	0.45614	0.666667	0.938596	0.54386	0.096491	0.359649	0.044053	0.088106	0	0.004386	0.245614	0.535088	0.780702	1	0.02193	0.039474	0.434211	0.517544	0.631579	0.061404	0.144737	0.399123	0.697368	0.969298	0.552632	0.405286	0.017544	0.22807	0.491228	0.701754	0.964912	0.364035
0.281159	0.386473	0.332367	0.190522	0.204062	0.258221	0.004831	0.228986	0.497585	0.737198	0.996135	0.001932	0.275362	0.490821	0.7343	0.999034	0.000966	0.227053	0.528502	0.771014	1	0.555556	0.228019	0.216425	0.088008	0.047389	0.004836	0.000966	0.243478	0.438647	0.715942	1	0.03285	0.17971	0.386473	0.512077	0.8	0.004831	0.552657	0.75942	0.891787	0.994203	0.53913	0.377176	0.003865	0.219324	0.497585	0.755556	0.993237	0.404831
0.272727	0.373206	0.354067	0.1875	0.1875	0.216346	0.019139	0.191388	0.502392	0.741627	0.995215	0.009569	0.253589	0.45933	0.751196	0.985646	0.004785	0.23445	0.492823	0.717703	1	0.382775	0.244019	0.373206	0.067308	0.076923	0.009615	0.004785	0.114833	0.617225	0.837321	1	0.043062	0.263158	0.559809	0.889952	0.995215	0.038278	0.320574	0.416268	0.665072	0.808612	0.641148	0.288462	0.043062	0.287081	0.521531	0.736842	0.990431	0.349282
0.329457	0.344961	0.325581	0.241245	0.178988	0.225681	0.011628	0.232558	0.515504	0.755814	0.992248	0.007752	0.197674	0.48062	0.732558	0.957364	0.003876	0.27907	0.476744	0.728682	1	0.422481	0.20155	0.375969	0.07393	0.089494	0.019455	0.003876	0.24031	0.5	0.717054	1	0.127907	0.333333	0.399225	0.682171	0.860465	0.011628	0.116279	0.589147	0.77907	0.984496	0.503876	0.350195	0.031008	0.263566	0.465116	0.74031	0.976744	0.379845
0.232117	0.340146	0.427737	0.144737	0.182749	0.27193	0.005839	0.265693	0.594161	0.865693	0.99562	0.00292	0.261314	0.519708	0.785401	1	0.00146	0.236496	0.446715	0.648175	0.99708	0.29927	0.024818	0.675912	0.01462	0.055556	0.002924	0.00146	0.540146	0.840876	0.916788	1	0.070073	0.659854	0.788321	0.913869	0.932847	0.00292	0.2	0.388321	0.589781	0.827737	0.694891	0.216374	0.010219	0.216058	0.416058	0.630657	0.99708	0.332847
0.393293	0.307927	0.29878	0.238532	0.2263	0.211009	0.009146	0.253049	0.478659	0.737805	0.987805	0.006098	0.20122	0.564024	0.771341	1	0.003049	0.228659	0.5	0.710366	0.993902	0.487805	0.198171	0.314024	0.088685	0.094801	0.009174	0.003049	0.307927	0.533537	0.777439	1	0.015244	0.128049	0.362805	0.631098	0.841463	0.057927	0.195122	0.515244	0.79878	0.990854	0.496951	0.440367	0.015244	0.192073	0.448171	0.655488	0.981707	0.332317
0.277778	0.416667	0.305556	0.236934	0.188153	0.271777	0.006944	0.302083	0.5625	0.774306	0.996528	0.013889	0.173611	0.430556	0.673611	0.993056	0.003472	0.28125	0.493056	0.795139	1	0.440972	0.107639	0.451389	0.041812	0.069686	0	0.003472	0.170139	0.440972	0.6875	1	0.100694	0.284722	0.395833	0.621528	0.8125	0.041667	0.336806	0.513889	0.829861	0.989583	0.635417	0.397213	0.010417	0.243056	0.413194	0.677083	0.986111	0.4375
0.385399	0.29202	0.322581	0.185374	0.268707	0.205782	0.003396	0.24618	0.531409	0.758913	1	0.010187	0.232598	0.444822	0.733447	0.996604	0.001698	0.252971	0.514431	0.747029	0.986418	0.380306	0.256367	0.363328	0.103741	0.062925	0.008503	0.001698	0.225806	0.451613	0.702886	1	0.010187	0.242784	0.560272	0.765705	0.972835	0.023769	0.303905	0.49236	0.803056	0.994907	0.587436	0.346939	0.01528	0.271647	0.511036	0.736842	0.993209	0.281834
0.368932	0.339806	0.291262	0.22549	0.245098	0.196078	0.019417	0.223301	0.407767	0.728155	0.980583	0.038835	0.174757	0.543689	0.708738	1	0.009709	0.291262	0.485437	0.757282	0.951456	0.349515	0.281553	0.368932	0.107843	0.04902	0.009804	0.009709	0.291262	0.446602	0.776699	1	0.300971	0.38835	0.514563	0.650485	0.76699	0.029126	0.106796	0.203883	0.84466	0.941748	0.466019	0.392157	0.058252	0.31068	0.495146	0.660194	0.951456	0.359223
0.325444	0.337278	0.337278	0.232143	0.202381	0.267857	0.017751	0.284024	0.544379	0.816568	1	0.029586	0.189349	0.461538	0.710059	0.994083	0.005917	0.230769	0.443787	0.692308	0.988166	0.508876	0.254438	0.236686	0.089286	0.053571	0.005952	0.005917	0.248521	0.467456	0.804734	1	0.017751	0.094675	0.497041	0.745562	0.970414	0.16568	0.218935	0.52071	0.656805	0.893491	0.514793	0.380952	0.011834	0.218935	0.47929	0.686391	0.95858	0.343195
0.355177	0.327654	0.317169	0.211286	0.257218	0.203412	0.002621	0.243775	0.549148	0.779817	1	0.006553	0.309305	0.471822	0.676278	0.996068	0.001311	0.187418	0.482307	0.770642	0.997379	0.478375	0.256881	0.264744	0.107612	0.055118	0.007874	0.001311	0.235911	0.427261	0.707733	1	0.068152	0.444299	0.74574	0.878113	0.993447	0.017038	0.14941	0.458716	0.581913	0.984273	0.652687	0.341207	0.003932	0.249017	0.499345	0.731324	0.994758	0.343381
0.29932	0.348639	0.352041	0.172061	0.199319	0.25724	0.003401	0.207483	0.440476	0.719388	0.998299	0.010204	0.285714	0.554422	0.753401	0.988095	0.001701	0.234694	0.479592	0.755102	1	0.462585	0.243197	0.294218	0.103918	0.052811	0.001704	0.001701	0.418367	0.612245	0.795918	1	0.006803	0.544218	0.685374	0.833333	0.996599	0.017007	0.14966	0.239796	0.341837	0.993197	0.591837	0.374787	0.005102	0.265306	0.557823	0.77551	0.994898	0.370748
0.367089	0.350211	0.2827	0.232558	0.207188	0.175476	0.006329	0.28692	0.609705	0.835443	0.99789	0.010549	0.234177	0.455696	0.721519	1	0.00211	0.21097	0.43038	0.588608	0.993671	0.445148	0.090717	0.464135	0.054968	0.084567	0.008457	0.00211	0.160338	0.42827	0.708861	1	0.088608	0.128692	0.2173	0.331224	0.991561	0.080169	0.348101	0.624473	0.808017	0.987342	0.483122	0.38055	0.004219	0.301688	0.476793	0.704641	0.995781	0.379747
0.366154	0.332308	0.301538	0.211094	0.20339	0.208012	0.006154	0.287692	0.566154	0.8	1	0.003077	0.243077	0.435385	0.666154	0.996923	0.001538	0.238462	0.518462	0.718462	0.993846	0.490769	0.143077	0.366154	0.05547	0.067797	0.003082	0.001538	0.209231	0.378462	0.609231	1	0.153846	0.301538	0.575385	0.718462	0.996923	0.010769	0.384615	0.649231	0.789231	0.976923	0.455385	0.412943	0.013846	0.258462	0.503077	0.681538	0.993846	0.367692
0.263158	0.444444	0.292398	0.264706	0.170588	0.276471	0.017544	0.181287	0.397661	0.684211	0.982456	0.011696	0.309942	0.555556	0.760234	0.994152	0.005848	0.269006	0.473684	0.719298	1	0.48538	0.304094	0.210526	0.158824	0.052941	0.005882	0.005848	0.192982	0.502924	0.730994	1	0.017544	0.175439	0.467836	0.77193	0.894737	0.22807	0.385965	0.51462	0.94152	0.994152	0.538012	0.388235	0.023392	0.327485	0.51462	0.760234	0.994152	0.479532
0.292929	0.387205	0.319865	0.209459	0.192568	0.222973	0.006734	0.242424	0.383838	0.703704	1	0.010101	0.228956	0.552189	0.79798	0.996633	0.003367	0.239057	0.538721	0.750842	0.993266	0.447811	0.191919	0.360269	0.077703	0.070946	0.010135	0.003367	0.242424	0.464646	0.690236	1	0.010101	0.279461	0.393939	0.531987	0.993266	0.030303	0.232323	0.656566	0.774411	0.962963	0.498316	0.398649	0.010101	0.262626	0.569024	0.838384	0.993266	0.414141
0.348485	0.380303	0.271212	0.233687	0.195751	0.194234	0.004545	0.242424	0.493939	0.775758	1	0.00303	0.312121	0.536364	0.754545	0.99697	0.001515	0.180303	0.384848	0.69697	0.995455	0.687879	0.128788	0.183333	0.050076	0.050076	0.001517	0.001515	0.339394	0.559091	0.8	1	0.033333	0.143939	0.287879	0.472727	0.987879	0.009091	0.095455	0.256061	0.625758	0.930303	0.465152	0.367223	0.013636	0.225758	0.472727	0.760606	0.995455	0.390909
0.306011	0.385246	0.308743	0.232877	0.252055	0.210959	0.019126	0.254098	0.494536	0.737705	1	0.005464	0.226776	0.513661	0.748634	0.997268	0.002732	0.265027	0.489071	0.745902	0.991803	0.344262	0.480874	0.174863	0.109589	0.043836	0	0.002732	0.172131	0.54918	0.786885	1	0.030055	0.204918	0.396175	0.726776	0.997268	0.349727	0.453552	0.513661	0.800546	0.964481	0.401639	0.465753	0.008197	0.262295	0.595628	0.789617	0.997268	0.398907
0.290323	0.483871	0.225806	0.196721	0.147541	0.180328	0.048387	0.177419	0.322581	0.741935	1	0.016129	0.241935	0.516129	0.629032	0.919355	0.096774	0.354839	0.645161	0.790323	0.967742	0.66129	0.193548	0.145161	0.278689	0.04918	0.016393	0.016129	0.290323	0.564516	0.774194	1	0.209677	0.322581	0.467742	0.645161	0.967742	0.064516	0.080645	0.112903	0.145161	0.387097	0.33871	0.360656	0.096774	0.354839	0.645161	0.870968	0.967742	0.564516
0.457249	0.267658	0.275093	0.238806	0.264925	0.156716	0.007435	0.234201	0.490706	0.736059	1	0.01487	0.304833	0.565056	0.765799	0.981413	0.003717	0.211896	0.423792	0.684015	0.98513	0.275093	0.066914	0.657993	0.029851	0.089552	0	0.003717	0.163569	0.520446	0.769517	1	0.011152	0.022305	0.055762	0.070632	0.159851	0.111524	0.301115	0.531599	0.747212	0.966543	0.405204	0.447761	0.011152	0.237918	0.438662	0.695167	0.959108	0.271375
0.276762	0.472585	0.250653	0.235602	0.115183	0.217277	0.010444	0.248042	0.402089	0.67624	0.989556	0.002611	0.24282	0.509138	0.754569	0.997389	0.020888	0.224543	0.548303	0.772846	1	0.592689	0.37859	0.028721	0.133508	0.018325	0.002618	0.002611	0.276762	0.469974	0.751958	1	0.023499	0.214099	0.522193	0.75718	0.968668	0.112272	0.114883	0.464752	0.624021	0.738903	0.396867	0.366492	0.015666	0.258486	0.509138	0.765013	0.971279	0.475196
0.297203	0.370629	0.332168	0.22807	0.161404	0.235088	0.027972	0.248252	0.5	0.741259	1	0.006993	0.22028	0.461538	0.734266	0.996503	0.003497	0.244755	0.531469	0.751748	0.982517	0.34965	0.234266	0.416084	0.084211	0.070175	0	0.003497	0.202797	0.496503	0.730769	1	0.01049	0.125874	0.573427	0.821678	0.982517	0.052448	0.332168	0.475524	0.65035	0.881119	0.601399	0.364912	0.01049	0.283217	0.472028	0.713287	0.982517	0.391608
0.339912	0.383772	0.276316	0.279121	0.202198	0.186813	0.006579	0.22807	0.471491	0.739035	1	0.004386	0.234649	0.513158	0.776316	0.997807	0.002193	0.276316	0.515351	0.730263	0.991228	0.403509	0.184211	0.412281	0.076923	0.076923	0.006593	0.002193	0.164474	0.394737	0.701754	1	0.131579	0.278509	0.596491	0.826754	0.958333	0.08114	0.370614	0.52193	0.741228	0.995614	0.548246	0.356044	0.054825	0.276316	0.464912	0.701754	0.989035	0.394737
0.318333	0.468333	0.213333	0.283806	0.126878	0.230384	0.003333	0.231667	0.488333	0.736667	0.998333	0.015	0.25	0.471667	0.733333	0.993333	0.001667	0.273333	0.541667	0.793333	1	0.758333	0.075	0.166667	0.040067	0.053422	0.006678	0.001667	0.211667	0.433333	0.665	1	0.053333	0.388333	0.578333	0.716667	0.923333	0.008333	0.486667	0.793333	0.906667	0.996667	0.37	0.353923	0.021667	0.395	0.598333	0.798333	0.995	0.516667
0.287958	0.408377	0.303665	0.247368	0.226316	0.194737	0.026178	0.172775	0.350785	0.727749	0.994764	0.020942	0.319372	0.581152	0.811518	0.989529	0.005236	0.219895	0.471204	0.712042	1	0.570681	0.324607	0.104712	0.126316	0.042105	0	0.005236	0.26178	0.554974	0.832461	1	0.089005	0.371728	0.497382	0.670157	0.801047	0.026178	0.04712	0.125654	0.544503	0.963351	0.549738	0.336842	0.020942	0.267016	0.497382	0.649215	0.973822	0.418848
0.348066	0.40884	0.243094	0.222222	0.161111	0.222222	0.022099	0.259669	0.39779	0.60221	1	0.01105	0.143646	0.535912	0.751381	0.98895	0.005525	0.320442	0.618785	0.790055	0.994475	0.243094	0.022099	0.734807	0.011111	0.077778	0	0.005525	0.430939	0.674033	0.878453	1	0.850829	0.850829	0.856354	0.861878	0.867403	0.027624	0.226519	0.40884	0.657459	0.955801	0.480663	0.433333	0.033149	0.154696	0.552486	0.790055	0.983425	0.414365
0.246847	0.385586	0.367568	0.18231	0.146209	0.268953	0.003604	0.362162	0.581982	0.866667	0.989189	0.010811	0.227027	0.484685	0.727928	0.998198	0.001802	0.223423	0.481081	0.695495	1	0.322523	0.034234	0.643243	0.009025	0.077617	0.005415	0.001802	0.358559	0.706306	0.90991	1	0.010811	0.016216	0.511712	0.699099	0.926126	0.007207	0.232432	0.437838	0.636036	0.922523	0.69009	0.176895	0.007207	0.212613	0.473874	0.677477	0.994595	0.38018
0.344193	0.315864	0.339943	0.188652	0.252482	0.214184	0.011331	0.286119	0.511331	0.787535	1	0.004249	0.195467	0.46034	0.696884	0.998584	0.001416	0.243626	0.514164	0.763456	0.997167	0.529745	0.194051	0.276204	0.080851	0.078014	0.004255	0.001416	0.201133	0.450425	0.699717	1	0.025496	0.342776	0.55949	0.82153	0.971671	0.01983	0.249292	0.563739	0.774788	0.997167	0.558074	0.377305	0.002833	0.266289	0.524079	0.763456	0.984419	0.310198
0.29563	0.367609	0.336761	0.229381	0.198454	0.226804	0.010283	0.25964	0.570694	0.784062	0.997429	0.005141	0.218509	0.496144	0.719794	1	0.002571	0.244216	0.465296	0.70437	0.969152	0.416452	0.182519	0.401028	0.064433	0.059278	0.002577	0.002571	0.285347	0.506427	0.758355	1	0.010283	0.07455	0.267352	0.424165	0.917738	0.113111	0.323907	0.652956	0.77635	0.96144	0.573265	0.396907	0.007712	0.244216	0.447301	0.678663	0.982005	0.365039
0.312292	0.352159	0.335548	0.193333	0.223333	0.24	0.009967	0.262458	0.568106	0.797342	1	0.006645	0.196013	0.478405	0.69103	0.986711	0.003322	0.265781	0.481728	0.704319	0.993355	0.305648	0.159468	0.534884	0.07	0.11	0.003333	0.003322	0.189369	0.465116	0.734219	1	0.079734	0.196013	0.348837	0.551495	0.754153	0.006645	0.27907	0.598007	0.813953	0.980066	0.604651	0.373333	0.006645	0.299003	0.531561	0.717608	0.973422	0.368771
0.234667	0.456	0.309333	0.208556	0.144385	0.254011	0.010667	0.253333	0.501333	0.733333	0.981333	0.005333	0.224	0.512	0.72	1	0.002667	0.24	0.461333	0.802667	0.997333	0.464	0.194667	0.341333	0.09893	0.050802	0.002674	0.002667	0.242667	0.568	0.813333	1	0.077333	0.173333	0.610667	0.904	0.994667	0.021333	0.272	0.418667	0.68	0.781333	0.618667	0.395722	0.016	0.277333	0.536	0.762667	0.997333	0.474667
0.356828	0.314537	0.328634	0.223104	0.262787	0.20194	0.001762	0.259912	0.52511	0.747137	1	0.003524	0.226432	0.457269	0.74185	0.995595	0.000881	0.248458	0.503084	0.754185	0.999119	0.511013	0.25022	0.238767	0.095238	0.07231	0.007055	0.000881	0.188546	0.489868	0.760352	1	0.00793	0.29163	0.484581	0.788546	0.998238	0.077533	0.252863	0.52511	0.739207	0.995595	0.490749	0.395062	0.002643	0.217621	0.497797	0.74978	0.998238	0.346256
0.375254	0.286004	0.338742	0.211382	0.262195	0.174797	0.004057	0.245436	0.523327	0.754564	1	0.014199	0.273834	0.509128	0.760649	0.995943	0.002028	0.233266	0.464503	0.701826	0.98783	0.472617	0.141988	0.385396	0.065041	0.060976	0.004065	0.002028	0.267748	0.525355	0.758621	1	0.008114	0.21501	0.338742	0.74645	0.98783	0.044625	0.243408	0.46856	0.681542	0.981744	0.527383	0.394309	0.006085	0.241379	0.46856	0.687627	0.98783	0.31643
0.189084	0.352827	0.45809	0.136719	0.140625	0.34375	0.003899	0.325536	0.526316	0.719298	0.986355	0.007797	0.28655	0.522417	0.781676	0.998051	0.001949	0.212476	0.477583	0.732943	1	0.191033	0.011696	0.797271	0.001953	0.068359	0.001953	0.001949	0.333333	0.475634	0.789474	1	0.793372	0.793372	0.797271	0.79922	0.803119	0.009747	0.239766	0.497076	0.727096	0.986355	0.74269	0.253906	0.009747	0.237817	0.469786	0.756335	0.994152	0.346979
0.368124	0.32158	0.310296	0.200565	0.237288	0.210452	0.005642	0.311707	0.5811	0.753173	0.99859	0.004231	0.205924	0.435825	0.732017	1	0.00141	0.218618	0.480959	0.757405	0.990127	0.61213	0.100141	0.287729	0.056497	0.064972	0	0.00141	0.232722	0.51622	0.767278	1	0.052186	0.293371	0.554302	0.799718	0.956276	0.007052	0.270804	0.493653	0.706629	0.946403	0.559944	0.355932	0.002821	0.19323	0.431594	0.698166	0.992948	0.320169
0.325893	0.368304	0.305804	0.255034	0.205817	0.212528	0.004464	0.274554	0.522321	0.754464	0.997768	0.006696	0.207589	0.399554	0.678571	1	0.002232	0.303571	0.575893	0.785714	0.995536	0.450893	0.120536	0.428571	0.04698	0.096197	0.006711	0.002232	0.174107	0.439732	0.665179	1	0.006696	0.430804	0.591518	0.727679	0.84375	0.084821	0.247768	0.544643	0.803571	0.977679	0.589286	0.384787	0.006696	0.245536	0.484375	0.720982	0.995536	0.357143
0.281879	0.395973	0.322148	0.202703	0.243243	0.236486	0.053691	0.463087	0.630872	0.812081	0.993289	0.026846	0.174497	0.355705	0.624161	1	0.006711	0.214765	0.516779	0.771812	0.973154	0.281879	0.053691	0.66443	0.013514	0.135135	0.013514	0.006711	0.241611	0.563758	0.657718	1	0.33557	0.342282	0.355705	0.369128	0.946309	0.026846	0.201342	0.503356	0.744966	0.932886	0.577181	0.513514	0.020134	0.241611	0.469799	0.771812	0.973154	0.395973
0.477273	0.272727	0.25	0.310345	0.264368	0.08046	0.022727	0.227273	0.420455	0.590909	0.965909	0.034091	0.147727	0.625	0.772727	0.988636	0.011364	0.318182	0.568182	0.840909	1	0.568182	0.147727	0.284091	0.022989	0.045977	0.045977	0.011364	0.136364	0.534091	0.772727	1	0.477273	0.5	0.693182	0.727273	0.909091	0.272727	0.329545	0.397727	0.465909	0.931818	0.272727	0.298851	0.238636	0.431818	0.670455	0.761364	0.943182	0.420455
0.305882	0.380392	0.313725	0.208251	0.222004	0.227898	0.005882	0.180392	0.464706	0.715686	1	0.003922	0.260784	0.5	0.737255	0.992157	0.001961	0.268627	0.52549	0.788235	0.996078	0.405882	0.22549	0.368627	0.094303	0.066798	0.007859	0.001961	0.307843	0.480392	0.741176	1	0.12549	0.323529	0.676471	0.82549	0.972549	0.007843	0.111765	0.462745	0.631373	0.994118	0.639216	0.341847	0.02549	0.288235	0.531373	0.754902	0.996078	0.415686
0.277778	0.428241	0.293981	0.227378	0.176334	0.241299	0.006944	0.287037	0.532407	0.729167	0.986111	0.00463	0.219907	0.44213	0.743056	0.99537	0.002315	0.215278	0.509259	0.805556	1	0.502315	0.171296	0.326389	0.064965	0.083527	0.023202	0.002315	0.261574	0.428241	0.708333	1	0.071759	0.412037	0.55787	0.625	0.912037	0.020833	0.162037	0.643519	0.856481	0.993056	0.537037	0.348028	0.020833	0.219907	0.490741	0.780093	0.993056	0.44213
0.345455	0.369697	0.284848	0.25	0.182927	0.213415	0.012121	0.290909	0.581818	0.769697	1	0.024242	0.278788	0.557576	0.751515	0.969697	0.006061	0.175758	0.333333	0.551515	0.993939	0.551515	0.284848	0.163636	0.109756	0.060976	0.012195	0.006061	0.278788	0.672727	0.836364	1	0.169697	0.315152	0.442424	0.545455	0.993939	0.060606	0.090909	0.133333	0.539394	0.733333	0.49697	0.280488	0.018182	0.181818	0.424242	0.569697	0.993939	0.430303
0.359375	0.421875	0.21875	0.274151	0.164491	0.211488	0.013021	0.190104	0.388021	0.645833	0.997396	0.005208	0.341146	0.604167	0.820312	0.992188	0.002604	0.205729	0.458333	0.716146	1	0.5625	0.057292	0.380208	0.036554	0.078329	0.005222	0.002604	0.268229	0.565104	0.828125	1	0.013021	0.481771	0.507812	0.567708	0.71875	0.007812	0.15625	0.390625	0.75	0.880208	0.325521	0.391645	0.007812	0.299479	0.513021	0.721354	0.979167	0.419271
0.387195	0.371951	0.240854	0.302752	0.174312	0.149847	0.045732	0.286585	0.527439	0.756098	0.996951	0.012195	0.176829	0.439024	0.713415	0.990854	0.003049	0.216463	0.503049	0.759146	1	0.466463	0.015244	0.518293	0.030581	0.116208	0	0.003049	0.158537	0.460366	0.72561	1	0.295732	0.295732	0.405488	0.557927	0.942073	0.015244	0.307927	0.518293	0.746951	0.984756	0.439024	0.40367	0.009146	0.243902	0.5	0.75	0.978659	0.393293
0.320388	0.368932	0.31068	0.284314	0.186275	0.264706	0.029126	0.184466	0.485437	0.68932	0.941748	0.019417	0.281553	0.456311	0.737864	0.980583	0.009709	0.271845	0.524272	0.718447	1	0.252427	0.174757	0.572816	0.058824	0.078431	0	0.009709	0.281553	0.456311	0.621359	1	0.300971	0.330097	0.427184	0.495146	0.543689	0.058252	0.184466	0.640777	0.786408	0.932039	0.446602	0.529412	0.058252	0.262136	0.436893	0.699029	0.961165	0.417476
0.257143	0.371429	0.371429	0.246377	0.188406	0.26087	0.028571	0.357143	0.571429	0.728571	0.942857	0.085714	0.3	0.528571	0.757143	1	0.014286	0.128571	0.4	0.628571	0.985714	0.714286	0.285714	0	0.057971	0	0	0.014286	0.457143	0.642857	0.814286	1	0.057143	0.114286	0.185714	0.257143	0.442857	0	0	0	0	0	0.442857	0.405797	0.057143	0.142857	0.257143	0.6	0.985714	0.457143
0.316092	0.350575	0.333333	0.213873	0.213873	0.225434	0.028736	0.218391	0.482759	0.758621	0.982759	0.011494	0.281609	0.511494	0.775862	0.994253	0.005747	0.195402	0.488506	0.678161	1	0.488506	0.155172	0.356322	0.080925	0.069364	0.011561	0.005747	0.304598	0.54023	0.741379	1	0.235632	0.344828	0.5	0.597701	0.770115	0.022989	0.103448	0.425287	0.856322	0.982759	0.477011	0.416185	0.017241	0.172414	0.425287	0.683908	0.971264	0.373563
0.327526	0.348432	0.324042	0.213287	0.206294	0.234266	0.02439	0.268293	0.491289	0.738676	0.982578	0.010453	0.202091	0.515679	0.728223	0.996516	0.003484	0.261324	0.487805	0.749129	1	0.355401	0.264808	0.379791	0.066434	0.066434	0.01049	0.003484	0.327526	0.592334	0.738676	1	0.020906	0.421603	0.58885	0.749129	0.850174	0.013937	0.12892	0.268293	0.522648	0.986063	0.56446	0.377622	0.013937	0.236934	0.567944	0.766551	0.989547	0.372822
0.35514	0.317757	0.327103	0.198113	0.254717	0.188679	0.046729	0.186916	0.542056	0.757009	0.990654	0.018692	0.252336	0.448598	0.71028	1	0.009346	0.224299	0.504673	0.728972	0.981308	0.327103	0.261682	0.411215	0.09434	0.075472	0	0.009346	0.196262	0.485981	0.682243	1	0.018692	0.233645	0.53271	0.757009	0.841121	0.065421	0.299065	0.401869	0.878505	0.981308	0.495327	0.396226	0.037383	0.280374	0.485981	0.682243	0.981308	0.345794
0.333333	0.266667	0.4	0.189189	0.189189	0.162162	0.026667	0.333333	0.52	0.746667	0.986667	0.066667	0.346667	0.533333	0.626667	0.96	0.013333	0.173333	0.32	0.693333	1	0.52	0.066667	0.413333	0.027027	0.027027	0.027027	0.013333	0.56	0.693333	0.826667	1	0.306667	0.306667	0.32	0.906667	0.933333	0.04	0.12	0.226667	0.36	0.466667	0.506667	0.378378	0.08	0.186667	0.4	0.64	0.96	0.413333
0.370062	0.403326	0.226611	0.304167	0.154167	0.175	0.008316	0.280665	0.511435	0.758836	0.997921	0.004158	0.261954	0.513514	0.760915	0.995842	0.002079	0.185031	0.451143	0.692308	1	0.68815	0.051975	0.259875	0.035417	0.05625	0.010417	0.002079	0.24948	0.528067	0.765073	1	0.014553	0.110187	0.182952	0.490644	0.742204	0.031185	0.370062	0.496881	0.663202	0.954262	0.363825	0.35	0.014553	0.189189	0.453222	0.673597	0.987526	0.459459
0.260684	0.431624	0.307692	0.207709	0.132762	0.284797	0.004274	0.363248	0.688034	0.852564	1	0.010684	0.224359	0.529915	0.762821	0.972222	0.002137	0.207265	0.410256	0.566239	0.989316	0.512821	0.025641	0.461538	0.014989	0.074946	0.002141	0.002137	0.40812	0.685897	0.82906	1	0.029915	0.034188	0.162393	0.350427	0.925214	0.044872	0.175214	0.318376	0.519231	0.995726	0.510684	0.175589	0.00641	0.16453	0.320513	0.491453	0.989316	0.463675
0.324022	0.379888	0.296089	0.207865	0.241573	0.247191	0.01676	0.268156	0.469274	0.659218	0.994413	0.011173	0.201117	0.47486	0.726257	1	0.005587	0.284916	0.536313	0.815642	0.98324	0.620112	0.22905	0.150838	0.106742	0.02809	0.016854	0.005587	0.217877	0.497207	0.726257	1	0.039106	0.184358	0.446927	0.804469	0.98324	0.296089	0.351955	0.52514	0.564246	0.871508	0.569832	0.337079	0.03352	0.234637	0.435754	0.804469	0.98324	0.368715
0.197128	0.390339	0.412533	0.135948	0.130719	0.34902	0.002611	0.167102	0.477807	0.711488	0.992167	0.005222	0.258486	0.486945	0.745431	1	0.001305	0.272846	0.522193	0.761097	0.997389	0.348564	0.079634	0.571802	0.037908	0.071895	0.00915	0.001305	0.174935	0.463446	0.781984	1	0.009138	0.13577	0.370757	0.789817	0.992167	0.075718	0.292428	0.539164	0.72846	0.951697	0.751958	0.19085	0.009138	0.284595	0.522193	0.746736	0.998695	0.381201
0.305085	0.379661	0.315254	0.238095	0.156463	0.227891	0.020339	0.298305	0.511864	0.725424	0.99322	0.00678	0.20678	0.440678	0.691525	1	0.00339	0.213559	0.535593	0.769492	0.99661	0.413559	0.352542	0.233898	0.132653	0.030612	0.003401	0.00339	0.274576	0.477966	0.769492	1	0.125424	0.250847	0.474576	0.637288	0.823729	0.030508	0.084746	0.613559	0.894915	0.955932	0.440678	0.340136	0.013559	0.169492	0.430508	0.644068	0.945763	0.389831
0.418367	0.234694	0.346939	0.14433	0.319588	0.247423	0.020408	0.234694	0.520408	0.795918	1	0.061224	0.295918	0.44898	0.642857	0.969388	0.010204	0.193878	0.469388	0.693878	0.959184	0.489796	0.408163	0.102041	0.164948	0.020619	0	0.010204	0.244898	0.44898	0.744898	1	0.040816	0.326531	0.622449	0.77551	0.979592	0.071429	0.081633	0.112245	0.132653	0.163265	0.510204	0.391753	0.030612	0.27551	0.44898	0.693878	0.969388	0.255102
0.288678	0.401897	0.309425	0.209964	0.212337	0.247331	0.001186	0.264375	0.534084	0.78364	0.998814	0.004149	0.250741	0.503853	0.716064	1	0.000593	0.229401	0.466509	0.751037	0.999407	0.45406	0.259632	0.286307	0.071767	0.061091	0.002966	0.000593	0.289864	0.573207	0.774748	1	0.01719	0.155898	0.53112	0.812092	0.996443	0.001778	0.238886	0.339656	0.596325	0.998222	0.517487	0.385528	0.001778	0.255483	0.463545	0.742739	0.999407	0.395376
0.338875	0.38491	0.276215	0.245839	0.189501	0.213828	0.002558	0.249361	0.485934	0.696931	0.996164	0.011509	0.258312	0.517903	0.80179	1	0.001279	0.230179	0.484655	0.745524	0.998721	0.558824	0.318414	0.122762	0.107554	0.035851	0.002561	0.001279	0.258312	0.524297	0.805627	1	0.035806	0.200767	0.388747	0.571611	0.933504	0.002558	0.554987	0.777494	0.900256	0.987212	0.505115	0.353393	0.002558	0.237852	0.512788	0.7289	0.987212	0.401535
0.217054	0.476744	0.306202	0.229572	0.136187	0.33463	0.007752	0.232558	0.511628	0.755814	0.957364	0.011628	0.27907	0.503876	0.736434	1	0.003876	0.205426	0.472868	0.74031	0.996124	0.368217	0.224806	0.406977	0.077821	0.077821	0	0.003876	0.20155	0.465116	0.751938	1	0.023256	0.244186	0.542636	0.77907	0.879845	0.054264	0.286822	0.484496	0.70155	0.992248	0.627907	0.342412	0.01938	0.282946	0.496124	0.75969	0.996124	0.496124
0.362676	0.355634	0.28169	0.261484	0.187279	0.212014	0.010563	0.200704	0.461268	0.721831	1	0.007042	0.274648	0.535211	0.799296	0.992958	0.003521	0.246479	0.510563	0.68662	0.978873	0.40493	0.172535	0.422535	0.077739	0.084806	0	0.003521	0.295775	0.644366	0.802817	1	0.102113	0.239437	0.440141	0.661972	0.96831	0.014085	0.21831	0.383803	0.623239	0.93662	0.598592	0.353357	0.017606	0.278169	0.528169	0.704225	0.971831	0.43662
0.303468	0.384393	0.312139	0.228986	0.17971	0.246377	0.00578	0.265896	0.520231	0.722543	1	0.008671	0.219653	0.459538	0.765896	0.99711	0.00289	0.248555	0.488439	0.748555	0.99422	0.482659	0.245665	0.271676	0.092754	0.057971	0	0.00289	0.245665	0.49422	0.760116	1	0.060694	0.280347	0.462428	0.803468	0.968208	0.095376	0.196532	0.526012	0.702312	0.939306	0.621387	0.382609	0.014451	0.263006	0.473988	0.710983	0.976879	0.375723
0.264535	0.476744	0.258721	0.259475	0.125364	0.268222	0.034884	0.392442	0.543605	0.805233	0.991279	0.005814	0.174419	0.430233	0.715116	1	0.002907	0.284884	0.511628	0.738372	0.979651	0.328488	0.011628	0.659884	0.005831	0.122449	0	0.002907	0.15407	0.415698	0.752907	1	0.965116	0.965116	0.968023	0.97093	0.973837	0.031977	0.284884	0.520349	0.735465	0.947674	0.479651	0.396501	0.02907	0.25	0.485465	0.729651	0.979651	0.485465
0.282178	0.519802	0.19802	0.218905	0.119403	0.189055	0.074257	0.277228	0.445545	0.59901	0.99505	0.00495	0.247525	0.638614	0.811881	1	0.024752	0.222772	0.351485	0.623762	0.985149	0.673267	0.128713	0.19802	0.039801	0.049751	0	0.00495	0.272277	0.544554	0.762376	1	0.20297	0.351485	0.856436	0.950495	0.985149	0.029703	0.113861	0.316832	0.514851	0.628713	0.5	0.348259	0.024752	0.267327	0.554455	0.806931	0.985149	0.539604
0.118919	0.427027	0.454054	0.11413	0.059783	0.38587	0.145946	0.189189	0.318919	0.567568	0.994595	0.010811	0.232432	0.47027	0.735135	0.972973	0.005405	0.297297	0.524324	0.772973	1	0.189189	0.016216	0.794595	0.01087	0.076087	0	0.005405	0.189189	0.405405	0.545946	1	0.513514	0.513514	0.513514	0.518919	0.524324	0.010811	0.275676	0.556757	0.756757	0.983784	0.767568	0.152174	0.016216	0.248649	0.481081	0.751351	0.972973	0.410811
0.225989	0.436911	0.3371	0.173585	0.139623	0.298113	0.003766	0.263653	0.487759	0.711864	0.998117	0.007533	0.244821	0.448211	0.751412	0.996234	0.001883	0.235405	0.559322	0.768362	1	0.457627	0.090395	0.451977	0.049057	0.067925	0.007547	0.001883	0.182674	0.372881	0.514124	1	0.016949	0.250471	0.435028	0.826742	0.988701	0.052731	0.316384	0.666667	0.800377	0.964218	0.629002	0.264151	0.011299	0.26177	0.630885	0.809793	0.996234	0.451977
0.259669	0.38895	0.351381	0.205752	0.186947	0.238938	0.003315	0.201105	0.512707	0.767956	1	0.00221	0.288398	0.523757	0.769061	0.996685	0.001105	0.250829	0.458564	0.699448	0.990055	0.355801	0.106077	0.538122	0.049779	0.060841	0.001106	0.001105	0.187845	0.577901	0.823204	1	0.037569	0.590055	0.8	0.865193	0.966851	0.048619	0.246409	0.454144	0.629834	0.98674	0.632044	0.300885	0.005525	0.283978	0.487293	0.702762	0.990055	0.375691
0.335616	0.321918	0.342466	0.208238	0.254005	0.217391	0.004566	0.242009	0.472603	0.742009	0.984018	0.015982	0.239726	0.495434	0.746575	0.995434	0.002283	0.255708	0.5	0.739726	1	0.46347	0.232877	0.303653	0.093822	0.057208	0.002288	0.002283	0.273973	0.577626	0.803653	1	0.006849	0.255708	0.570776	0.739726	0.958904	0.057078	0.221461	0.349315	0.545662	0.997717	0.652968	0.347826	0.006849	0.257991	0.515982	0.755708	0.997717	0.328767
0.312661	0.346253	0.341085	0.194301	0.251295	0.194301	0.005168	0.258398	0.501292	0.72093	0.989664	0.007752	0.268734	0.50646	0.754522	0.992248	0.002584	0.229974	0.478036	0.739018	1	0.581395	0.403101	0.015504	0.150259	0.010363	0	0.002584	0.25323	0.475452	0.73385	1	0.074935	0.317829	0.529716	0.770026	0.997416	0.020672	0.020672	0.02584	0.028424	0.286822	0.633075	0.326425	0.010336	0.27907	0.529716	0.751938	0.994832	0.413437
0.172986	0.43128	0.395735	0.144893	0.135392	0.32304	0.018957	0.203791	0.518957	0.810427	0.988152	0.004739	0.305687	0.526066	0.798578	1	0.00237	0.225118	0.443128	0.684834	0.99763	0.405213	0.06872	0.526066	0.026128	0.073634	0.007126	0.00237	0.407583	0.64218	0.869668	1	0.274882	0.372038	0.772512	0.7891	0.985782	0.009479	0.187204	0.36019	0.620853	0.959716	0.701422	0.270784	0.009479	0.277251	0.485782	0.696682	0.990521	0.407583
0.327902	0.338086	0.334012	0.212245	0.212245	0.240816	0.004073	0.209776	0.492872	0.775967	0.995927	0.008147	0.270876	0.509165	0.763747	0.983707	0.002037	0.258656	0.484725	0.727088	1	0.462322	0.1222	0.415479	0.046939	0.079592	0.002041	0.002037	0.215886	0.464358	0.767821	1	0.197556	0.344196	0.458248	0.556008	0.989817	0.016293	0.287169	0.608961	0.749491	0.940937	0.501018	0.379592	0.016293	0.248473	0.468432	0.688391	0.989817	0.372709
0.310748	0.35514	0.334112	0.215457	0.208431	0.252927	0.021028	0.254673	0.497664	0.686916	1	0.007009	0.240654	0.483645	0.768692	0.997664	0.002336	0.259346	0.523364	0.771028	0.990654	0.483645	0.130841	0.385514	0.035129	0.053864	0.007026	0.002336	0.226636	0.439252	0.759346	1	0.011682	0.121495	0.443925	0.843458	0.988318	0.030374	0.327103	0.542056	0.668224	0.971963	0.60514	0.332553	0.004673	0.233645	0.471963	0.726636	0.992991	0.366822
0.37395	0.315126	0.310924	0.248945	0.236287	0.223629	0.029412	0.260504	0.537815	0.752101	1	0.008403	0.172269	0.466387	0.718487	0.995798	0.004202	0.281513	0.478992	0.731092	0.991597	0.327731	0.037815	0.634454	0.025316	0.084388	0	0.004202	0.117647	0.306723	0.521008	1	0.012605	0.016807	0.02521	0.067227	0.096639	0.138655	0.369748	0.60084	0.794118	0.987395	0.504202	0.405063	0.012605	0.319328	0.470588	0.731092	0.991597	0.336134
0.164706	0.376471	0.458824	0.142857	0.083333	0.380952	0.058824	0.117647	0.458824	0.552941	1	0.047059	0.305882	0.517647	0.741176	0.964706	0.011765	0.223529	0.505882	0.764706	0.941176	0.282353	0.070588	0.647059	0.035714	0.083333	0.011905	0.011765	0.129412	0.517647	0.894118	1	0.447059	0.447059	0.470588	0.905882	0.929412	0.035294	0.223529	0.388235	0.682353	0.847059	0.682353	0.261905	0.070588	0.329412	0.576471	0.752941	0.952941	0.329412
0.226027	0.363014	0.410959	0.172414	0.158621	0.310345	0.041096	0.308219	0.547945	0.787671	0.972603	0.006849	0.328767	0.527397	0.732877	1	0.034247	0.150685	0.376712	0.726027	0.993151	0.568493	0.267123	0.164384	0.055172	0.013793	0	0.006849	0.410959	0.554795	0.856164	1	0.267123	0.356164	0.575342	0.643836	0.780822	0.027397	0.061644	0.10274	0.143836	0.184932	0.534247	0.358621	0.034247	0.157534	0.376712	0.636986	0.979452	0.445205
0.343612	0.334802	0.321586	0.20354	0.238938	0.221239	0.022026	0.259912	0.546256	0.757709	0.991189	0.008811	0.237885	0.45815	0.735683	0.995595	0.004405	0.22467	0.462555	0.748899	1	0.440529	0.207048	0.352423	0.070796	0.070796	0	0.004405	0.321586	0.546256	0.77533	1	0.022026	0.154185	0.343612	0.69163	0.942731	0.061674	0.202643	0.45815	0.656388	0.995595	0.528634	0.380531	0.017621	0.23348	0.45815	0.696035	0.986784	0.370044
0.28327	0.363118	0.353612	0.209524	0.186667	0.257143	0.011407	0.249049	0.5	0.714829	0.998099	0.013308	0.254753	0.519011	0.785171	1	0.001901	0.237643	0.486692	0.720532	0.988593	0.302281	0.140684	0.557034	0.072381	0.087619	0.00381	0.001901	0.262357	0.509506	0.78327	1	0.009506	0.353612	0.422053	0.606464	0.889734	0.007605	0.220532	0.534221	0.771863	0.990494	0.532319	0.411429	0.009506	0.277567	0.5	0.781369	0.990494	0.389734
0.323877	0.373522	0.3026	0.241706	0.194313	0.234597	0.007092	0.245863	0.48227	0.770686	0.990544	0.01182	0.217494	0.475177	0.72104	1	0.002364	0.27896	0.522459	0.763593	0.995272	0.413712	0.158392	0.427896	0.07346	0.078199	0.007109	0.002364	0.250591	0.444444	0.661939	1	0.080378	0.27896	0.486998	0.680851	0.947991	0.028369	0.238771	0.55792	0.79669	0.997636	0.65721	0.312796	0.004728	0.286052	0.515366	0.723404	0.995272	0.375887
0.203936	0.466905	0.329159	0.200717	0.109319	0.329749	0.007156	0.143113	0.450805	0.68873	1	0.003578	0.216458	0.479428	0.763864	0.998211	0.001789	0.34347	0.525939	0.756708	0.994633	0.386404	0.050089	0.563506	0.021505	0.064516	0.010753	0.001789	0.096601	0.42576	0.620751	1	0.144902	0.300537	0.55814	0.896243	0.994633	0.153846	0.320215	0.536673	0.769231	0.944544	0.690519	0.25448	0.014311	0.304114	0.499106	0.740608	0.991055	0.465116
0.294737	0.368421	0.336842	0.216931	0.243386	0.238095	0.015789	0.189474	0.494737	0.810526	1	0.010526	0.236842	0.473684	0.7	0.994737	0.005263	0.294737	0.531579	0.794737	0.989474	0.589474	0.394737	0.015789	0.137566	0.031746	0	0.005263	0.2	0.447368	0.694737	1	0.015789	0.321053	0.584211	0.784211	0.989474	0.047368	0.047368	0.047368	0.821053	0.831579	0.589474	0.42328	0.021053	0.268421	0.510526	0.731579	0.984211	0.405263
0.313333	0.36	0.326667	0.200669	0.207358	0.254181	0.013333	0.26	0.49	0.723333	0.996667	0.006667	0.25	0.503333	0.75	0.973333	0.003333	0.226667	0.51	0.76	1	0.416667	0.223333	0.36	0.086957	0.073579	0.013378	0.003333	0.226667	0.473333	0.666667	1	0.023333	0.263333	0.386667	0.596667	0.916667	0.05	0.326667	0.68	0.82	0.99	0.623333	0.38796	0.01	0.256667	0.476667	0.706667	0.993333	0.33
0.239437	0.43662	0.323944	0.1	0.171429	0.271429	0.028169	0.366197	0.774648	0.887324	1	0.042254	0.197183	0.309859	0.619718	0.985915	0.014085	0.323944	0.507042	0.661972	0.84507	0.267606	0.028169	0.704225	0.028571	0.142857	0	0.014085	0.070423	0.15493	0.422535	1	0.169014	0.169014	0.169014	0.169014	0.183099	0.056338	0.380282	0.605634	0.774648	0.957746	0.647887	0.2	0.056338	0.225352	0.492958	0.647887	0.84507	0.422535
0.459184	0.346939	0.193878	0.278351	0.195876	0.123711	0.05102	0.173469	0.397959	0.72449	0.989796	0.020408	0.367347	0.622449	0.765306	1	0.010204	0.22449	0.438776	0.612245	0.857143	0.714286	0.081633	0.204082	0.061856	0.103093	0	0.010204	0.306122	0.591837	0.785714	1	0.030612	0.040816	0.336735	0.418367	0.438776	0.132653	0.204082	0.255102	0.489796	0.857143	0.265306	0.371134	0.193878	0.346939	0.591837	0.693878	0.857143	0.336735
0.371951	0.335366	0.292683	0.269939	0.190184	0.196319	0.036585	0.262195	0.536585	0.77439	1	0.012195	0.231707	0.414634	0.676829	0.969512	0.006098	0.219512	0.469512	0.743902	0.993902	0.591463	0.164634	0.243902	0.07362	0.04908	0.01227	0.006098	0.256098	0.640244	0.79878	1	0.04878	0.140244	0.219512	0.463415	0.987805	0.085366	0.396341	0.536585	0.597561	0.902439	0.420732	0.417178	0.018293	0.207317	0.463415	0.713415	0.993902	0.365854
0.342105	0.299342	0.358553	0.188119	0.247525	0.194719	0.006579	0.220395	0.480263	0.769737	0.993421	0.009868	0.226974	0.490132	0.746711	0.996711	0.003289	0.263158	0.519737	0.740132	1	0.401316	0.151316	0.447368	0.059406	0.105611	0.006601	0.003289	0.190789	0.473684	0.746711	1	0.029605	0.111842	0.210526	0.684211	0.871711	0.0625	0.325658	0.565789	0.736842	0.990132	0.575658	0.422442	0.023026	0.259868	0.444079	0.703947	0.986842	0.282895
0.370968	0.251613	0.377419	0.161812	0.330097	0.190939	0.012903	0.241935	0.516129	0.719355	0.993548	0.022581	0.216129	0.458065	0.790323	1	0.003226	0.248387	0.5	0.745161	0.983871	0.441935	0.193548	0.364516	0.064725	0.071197	0	0.003226	0.180645	0.474194	0.754839	1	0.032258	0.280645	0.496774	0.764516	0.867742	0.135484	0.319355	0.519355	0.690323	0.993548	0.558065	0.427184	0.006452	0.235484	0.480645	0.729032	0.983871	0.293548
0.329099	0.381125	0.289776	0.250605	0.20339	0.23063	0.00121	0.240774	0.483364	0.748336	0.999395	0.004235	0.268603	0.510587	0.741682	1	0.000605	0.23654	0.500907	0.751966	0.99879	0.499093	0.334543	0.166364	0.109564	0.034504	0.000605	0.000605	0.22928	0.46219	0.699335	1	0.040532	0.245009	0.411978	0.628554	0.99879	0.001815	0.709619	0.77072	0.837871	0.992136	0.513007	0.38862	0.00242	0.258318	0.540835	0.767695	0.998185	0.411373
0.369565	0.340062	0.290373	0.242613	0.208398	0.18818	0.003106	0.254658	0.534161	0.799689	0.996894	0.009317	0.229814	0.46118	0.714286	1	0.001553	0.234472	0.479814	0.729814	0.993789	0.372671	0.068323	0.559006	0.026439	0.104199	0.004666	0.001553	0.259317	0.458075	0.67236	1	0.10559	0.299689	0.32764	0.503106	0.930124	0.004658	0.242236	0.56677	0.784161	0.995342	0.534161	0.423017	0.004658	0.245342	0.468944	0.704969	0.993789	0.324534
0.435294	0.176471	0.388235	0.107143	0.25	0.154762	0.035294	0.411765	0.541176	0.705882	0.988235	0.023529	0.129412	0.670588	0.882353	0.952941	0.011765	0.188235	0.294118	0.588235	1	0.270588	0	0.729412	0	0.047619	0	0.011765	0.658824	0.729412	0.929412	1	0	0	0	0	0	0.035294	0.2	0.388235	0.564706	0.882353	0.376471	0.380952	0.070588	0.258824	0.505882	0.823529	0.976471	0.176471
0.331768	0.338028	0.330203	0.219436	0.224138	0.206897	0.00626	0.259781	0.456964	0.758998	1	0.004695	0.245696	0.502347	0.723005	0.998435	0.001565	0.228482	0.533646	0.755869	0.99687	0.455399	0.165884	0.378717	0.07837	0.075235	0.003135	0.001565	0.208138	0.416275	0.690141	1	0.007825	0.197183	0.564945	0.710485	0.965571	0.040689	0.292645	0.546166	0.780908	0.99687	0.619718	0.347962	0.00939	0.29108	0.527387	0.748044	0.995305	0.359937
[truncated: 438 more rows]
[truncated: 83 more columns]
