# Supplementary material for: Prediction of RNA‐Binding Proteins by Voting Systems
Source: Hindawi journal article supplement (doi:10.1155/2011/506205), 2011-01-01
Supplement: f1 [file 506205.f1.zip › testSet8.csv]

v1	v2	v3	v4	v5	v6	v7	v8	v9	v10	v11	v12	v13	v14	v15	v16	v17	v18	v19	v20	v21	v22	v23	v24	v25	v26	v27	v28	v29	v30	v31	v32	v33	v34	v35	v36	v37	v38	v39	v40	v41	v42	v43	v44	v45	v46	v47	v48	v49	v50
0.337587	0.349188	0.313225	0.261324	0.207898	0.212544	0.00464	0.24826	0.470998	0.700696	0.99536	0.00232	0.213457	0.490719	0.75522	0.99884	0.00116	0.287703	0.537123	0.769142	1	0.515081	0.216937	0.267981	0.091754	0.049942	0.001161	0.00116	0.183295	0.429234	0.693735	1	0.0058	0.227378	0.527842	0.75522	0.99884	0.100928	0.400232	0.598608	0.796984	0.991879	0.529002	0.376307	0.00348	0.301624	0.580046	0.793503	0.99768	0.354988
0.373434	0.358396	0.26817	0.233375	0.183187	0.196989	0.002506	0.250627	0.513784	0.753133	0.998747	0.007519	0.201754	0.451128	0.746867	1	0.001253	0.300752	0.502506	0.739348	0.997494	0.512531	0.116541	0.370927	0.046424	0.076537	0.003764	0.001253	0.129073	0.389724	0.710526	1	0.182957	0.365915	0.517544	0.672932	0.91604	0.053885	0.373434	0.615288	0.833333	0.991228	0.427318	0.311167	0.010025	0.313283	0.487469	0.720551	0.997494	0.383459
0.344928	0.321739	0.333333	0.22061	0.243832	0.217707	0.004348	0.257971	0.517391	0.769565	0.991304	0.002899	0.211594	0.468116	0.713043	0.995652	0.001449	0.266667	0.515942	0.750725	1	0.401449	0.205797	0.392754	0.089985	0.063861	0.011611	0.001449	0.302899	0.508696	0.805797	1	0.005797	0.202899	0.434783	0.830435	0.998551	0.028986	0.201449	0.52029	0.649275	0.952174	0.562319	0.409289	0.007246	0.265217	0.488406	0.718841	0.997101	0.328986
0.318912	0.346106	0.334981	0.209158	0.226485	0.237624	0.002472	0.254635	0.50309	0.746601	0.998764	0.004944	0.245983	0.487021	0.736712	1	0.001236	0.228677	0.494438	0.751545	0.997528	0.469716	0.236094	0.29419	0.09901	0.054455	0.002475	0.001236	0.229913	0.484549	0.744129	1	0.038319	0.197775	0.415328	0.803461	0.997528	0.00618	0.320148	0.537701	0.708282	0.991347	0.552534	0.398515	0.003708	0.255871	0.469716	0.735476	0.997528	0.385661
0.338983	0.317797	0.34322	0.221277	0.259574	0.246809	0.012712	0.190678	0.394068	0.682203	1	0.008475	0.326271	0.550847	0.792373	0.991525	0.004237	0.241525	0.512712	0.741525	0.995763	0.45339	0.165254	0.381356	0.076596	0.102128	0.008511	0.004237	0.186441	0.525424	0.690678	1	0.275424	0.34322	0.402542	0.648305	0.987288	0.012712	0.211864	0.487288	0.834746	0.966102	0.533898	0.451064	0.021186	0.351695	0.588983	0.75	0.995763	0.326271
0.479532	0.251462	0.269006	0.264706	0.282353	0.158824	0.017544	0.216374	0.497076	0.748538	1	0.011696	0.204678	0.444444	0.80117	0.964912	0.005848	0.274854	0.48538	0.707602	0.976608	0.561404	0.105263	0.333333	0.052941	0.1	0.005882	0.005848	0.222222	0.561404	0.836257	1	0.064327	0.263158	0.292398	0.678363	0.97076	0.076023	0.339181	0.473684	0.701754	0.789474	0.415205	0.4	0.035088	0.28655	0.502924	0.730994	0.97076	0.263158
0.339928	0.348921	0.311151	0.236036	0.236036	0.185586	0.008993	0.206835	0.458633	0.735612	0.98741	0.007194	0.269784	0.501799	0.767986	0.998201	0.001799	0.242806	0.516187	0.733813	1	0.381295	0.07554	0.543165	0.030631	0.113514	0.001802	0.001799	0.278777	0.561151	0.834532	1	0.214029	0.273381	0.420863	0.476619	0.744604	0.003597	0.194245	0.494604	0.715827	0.989209	0.56295	0.410811	0.005396	0.285971	0.505396	0.77518	0.996403	0.372302
0.300813	0.439024	0.260163	0.286885	0.147541	0.254098	0.02439	0.235772	0.544715	0.715447	1	0.01626	0.195122	0.430894	0.772358	0.99187	0.00813	0.268293	0.487805	0.739837	0.98374	0.373984	0.138211	0.487805	0.04918	0.081967	0	0.00813	0.195122	0.341463	0.691057	1	0.260163	0.284553	0.422764	0.455285	0.764228	0.065041	0.479675	0.601626	0.869919	0.99187	0.471545	0.377049	0.04878	0.292683	0.495935	0.731707	0.98374	0.447154
0.41637	0.238434	0.345196	0.157143	0.307143	0.167857	0.032028	0.270463	0.505338	0.768683	0.989324	0.014235	0.231317	0.491103	0.718861	1	0.003559	0.234875	0.483986	0.711744	0.985765	0.3879	0.188612	0.423488	0.057143	0.078571	0	0.003559	0.19573	0.434164	0.704626	1	0.007117	0.295374	0.441281	0.644128	0.740214	0.053381	0.256228	0.537367	0.83274	0.992883	0.55516	0.414286	0.007117	0.245552	0.476868	0.66548	0.985765	0.224199
0.301887	0.40566	0.292453	0.251185	0.227488	0.21327	0.009434	0.221698	0.438679	0.669811	1	0.014151	0.240566	0.570755	0.84434	0.990566	0.004717	0.287736	0.495283	0.660377	0.886792	0.438679	0.363208	0.198113	0.127962	0.07109	0.004739	0.004717	0.273585	0.570755	0.783019	1	0.018868	0.283019	0.438679	0.613208	0.858491	0.080189	0.216981	0.556604	0.900943	0.985849	0.40566	0.454976	0.023585	0.245283	0.448113	0.660377	0.929245	0.415094
0.330882	0.404412	0.264706	0.251852	0.185185	0.177778	0.014706	0.286765	0.514706	0.705882	1	0.022059	0.235294	0.448529	0.757353	0.992647	0.007353	0.205882	0.470588	0.654412	0.919118	0.316176	0.139706	0.544118	0.044444	0.074074	0	0.007353	0.110294	0.301471	0.617647	1	0.242647	0.264706	0.352941	0.632353	0.669118	0.044118	0.419118	0.558824	0.801471	0.941176	0.404412	0.340741	0.051471	0.338235	0.507353	0.683824	0.919118	0.419118
0.404	0.284	0.312	0.212851	0.261044	0.192771	0.012	0.244	0.444	0.748	0.988	0.008	0.252	0.592	0.776	1	0.004	0.228	0.464	0.696	0.98	0.484	0.208	0.308	0.072289	0.032129	0	0.004	0.264	0.708	0.876	1	0.04	0.232	0.412	0.628	0.828	0.112	0.184	0.476	0.552	0.692	0.516	0.401606	0.02	0.228	0.48	0.684	0.98	0.284
0.352632	0.384211	0.263158	0.306878	0.206349	0.169312	0.010526	0.247368	0.484211	0.747368	1	0.015789	0.263158	0.584211	0.826316	0.989474	0.005263	0.215789	0.389474	0.626316	0.978947	0.621053	0.157895	0.221053	0.068783	0.068783	0.005291	0.005263	0.184211	0.6	0.784211	1	0.136842	0.278947	0.384211	0.521053	0.973684	0.078947	0.236842	0.457895	0.747368	0.978947	0.347368	0.391534	0.131579	0.3	0.526316	0.805263	0.978947	0.363158
0.340467	0.330739	0.328794	0.206628	0.230019	0.216374	0.009728	0.233463	0.527237	0.741245	0.988327	0.003891	0.287938	0.480545	0.770428	1	0.001946	0.219844	0.474708	0.717899	0.994163	0.429961	0.18677	0.383268	0.072125	0.068226	0.005848	0.001946	0.27821	0.595331	0.784047	1	0.116732	0.268482	0.692607	0.848249	0.980545	0.009728	0.206226	0.414397	0.570039	0.957198	0.461089	0.440546	0.005837	0.264591	0.494163	0.712062	0.994163	0.33463
0.369942	0.369942	0.260116	0.284884	0.197674	0.238372	0.011561	0.202312	0.445087	0.803468	1	0.023121	0.260116	0.49711	0.716763	0.99422	0.00578	0.254335	0.520231	0.710983	0.965318	0.566474	0.179191	0.254335	0.052326	0.075581	0.005814	0.00578	0.17341	0.34104	0.624277	1	0.242775	0.393064	0.635838	0.682081	0.884393	0.023121	0.491329	0.734104	0.797688	0.965318	0.549133	0.337209	0.023121	0.33526	0.554913	0.710983	0.965318	0.398844
0.340278	0.399306	0.260417	0.273043	0.144348	0.203478	0.005208	0.199653	0.418403	0.708333	0.994792	0.006944	0.248264	0.522569	0.743056	0.996528	0.001736	0.309028	0.567708	0.776042	1	0.539931	0.125	0.335069	0.048696	0.086957	0.003478	0.001736	0.164931	0.34375	0.637153	1	0.236111	0.571181	0.696181	0.871528	0.960069	0.005208	0.380208	0.588542	0.791667	0.991319	0.520833	0.365217	0.008681	0.322917	0.538194	0.743056	0.986111	0.432292
0.39759	0.361446	0.240964	0.304878	0.170732	0.231707	0.048193	0.253012	0.506024	0.710843	1	0.024096	0.180723	0.421687	0.662651	0.987952	0.012048	0.301205	0.481928	0.795181	0.975904	0.554217	0.120482	0.325301	0.073171	0.04878	0	0.012048	0.13253	0.373494	0.626506	1	0.180723	0.192771	0.313253	0.337349	0.566265	0.39759	0.457831	0.722892	0.807229	0.891566	0.349398	0.365854	0.192771	0.39759	0.566265	0.795181	0.927711	0.385542
0.354839	0.258065	0.387097	0.184783	0.228261	0.163043	0.053763	0.268817	0.494624	0.655914	0.978495	0.021505	0.344086	0.72043	0.892473	0.989247	0.010753	0.215054	0.430108	0.688172	1	0.430108	0.397849	0.172043	0.152174	0.065217	0.021739	0.010753	0.204301	0.602151	0.892473	1	0.215054	0.322581	0.537634	0.741935	0.88172	0.032258	0.11828	0.16129	0.430108	0.483871	0.494624	0.304348	0.064516	0.236559	0.451613	0.774194	0.956989	0.301075
0.236842	0.52193	0.241228	0.211454	0.123348	0.229075	0.013158	0.298246	0.447368	0.75	0.995614	0.008772	0.197368	0.548246	0.745614	0.991228	0.004386	0.232456	0.451754	0.719298	1	0.79386	0.096491	0.109649	0.044053	0.026432	0	0.004386	0.25	0.574561	0.77193	1	0.149123	0.258772	0.285088	0.342105	0.460526	0.201754	0.223684	0.377193	0.403509	0.97807	0.570175	0.325991	0.017544	0.315789	0.596491	0.741228	0.986842	0.486842
0.330544	0.401674	0.267782	0.268908	0.205882	0.193277	0.012552	0.225941	0.506276	0.769874	1	0.008368	0.242678	0.543933	0.757322	0.995816	0.004184	0.251046	0.430962	0.623431	0.970711	0.322176	0.09205	0.585774	0.042017	0.109244	0	0.004184	0.175732	0.472803	0.790795	1	0.435146	0.76569	0.824268	0.853556	0.979079	0.029289	0.242678	0.447699	0.610879	0.953975	0.485356	0.352941	0.050209	0.242678	0.439331	0.65272	0.970711	0.426778
0.455285	0.235772	0.308943	0.196721	0.270492	0.180328	0.01626	0.211382	0.463415	0.723577	1	0.121951	0.349593	0.569106	0.756098	0.97561	0.00813	0.235772	0.512195	0.674797	0.99187	0.365854	0.219512	0.414634	0.081967	0.114754	0	0.00813	0.284553	0.569106	0.747967	1	0.170732	0.235772	0.341463	0.666667	0.98374	0.03252	0.146341	0.495935	0.756098	0.861789	0.447154	0.360656	0.056911	0.333333	0.487805	0.682927	0.97561	0.227642
0.334365	0.331269	0.334365	0.22314	0.231405	0.245868	0.004128	0.214654	0.480908	0.726522	0.998968	0.008256	0.257998	0.522188	0.75645	0.992776	0.001032	0.260062	0.49742	0.762642	1	0.465428	0.224974	0.309598	0.083678	0.069215	0.005165	0.001032	0.220846	0.449948	0.657379	1	0.003096	0.216718	0.499484	0.675955	0.988648	0.038184	0.293086	0.608875	0.816305	0.996904	0.561404	0.380165	0.007224	0.30031	0.54902	0.77709	0.996904	0.345717
0.411111	0.244444	0.344444	0.213483	0.280899	0.202247	0.044444	0.211111	0.511111	0.733333	0.977778	0.022222	0.222222	0.5	0.744444	1	0.011111	0.233333	0.411111	0.7	0.988889	0.3	0.344444	0.355556	0.078652	0.033708	0.011236	0.011111	0.066667	0.177778	0.811111	1	0.088889	0.411111	0.733333	0.888889	0.977778	0.188889	0.266667	0.5	0.588889	0.677778	0.444444	0.404494	0.033333	0.266667	0.433333	0.711111	0.955556	0.255556
0.397516	0.31677	0.285714	0.2125	0.20625	0.2	0.018634	0.167702	0.391304	0.602484	1	0.012422	0.229814	0.583851	0.850932	0.987578	0.006211	0.310559	0.596273	0.763975	0.993789	0.515528	0.15528	0.329193	0.075	0.0875	0	0.006211	0.267081	0.602484	0.857143	1	0.180124	0.571429	0.677019	0.732919	0.981366	0.018634	0.142857	0.329193	0.453416	0.78882	0.459627	0.325	0.080745	0.360248	0.614907	0.751553	0.981366	0.304348
0.36377	0.416789	0.21944	0.262537	0.179941	0.165192	0.002946	0.265096	0.477172	0.734904	0.994109	0.005891	0.216495	0.546392	0.740795	0.997054	0.001473	0.253314	0.458027	0.762887	1	0.689249	0.029455	0.281296	0.022124	0.081121	0.013274	0.001473	0.215022	0.5243	0.733432	1	0.032401	0.409426	0.425626	0.837997	0.949926	0.050074	0.301915	0.466863	0.904271	0.991163	0.322533	0.39823	0.011782	0.284242	0.513991	0.751105	0.995582	0.409426
0.319319	0.415415	0.265265	0.226453	0.182365	0.194389	0.002002	0.247247	0.556557	0.790791	0.994995	0.003003	0.242242	0.444444	0.731732	0.997998	0.001001	0.248248	0.510511	0.713714	1	0.593594	0.052052	0.354354	0.034068	0.074148	0.006012	0.001001	0.301301	0.484484	0.78979	1	0.132132	0.4004	0.538539	0.774775	0.952953	0.038038	0.218218	0.513514	0.714715	0.992993	0.407407	0.380762	0.004004	0.245245	0.437437	0.705706	0.996997	0.428428
0.20283	0.584906	0.212264	0.186761	0.104019	0.219858	0.018868	0.15566	0.308962	0.455189	1	0.004717	0.391509	0.629717	0.799528	0.997642	0.002358	0.17217	0.34434	0.582547	0.995283	0.721698	0.125	0.153302	0.042553	0.047281	0	0.002358	0.398585	0.629717	0.818396	1	0.033019	0.108491	0.20283	0.308962	0.412736	0.018868	0.153302	0.28066	0.436321	0.775943	0.603774	0.335697	0.03066	0.339623	0.601415	0.778302	0.995283	0.549528
0.354839	0.354839	0.290323	0.26087	0.206522	0.217391	0.043011	0.247312	0.430108	0.709677	1	0.021505	0.225806	0.526882	0.698925	0.956989	0.010753	0.129032	0.451613	0.731183	0.978495	0.451613	0.215054	0.333333	0.086957	0.108696	0	0.010753	0.236559	0.505376	0.677419	1	0.032258	0.075269	0.129032	0.55914	0.752688	0.193548	0.387097	0.473118	0.892473	0.978495	0.419355	0.413043	0.032258	0.11828	0.451613	0.709677	0.946237	0.397849
0.369085	0.456362	0.174553	0.294737	0.115789	0.146316	0.008412	0.233438	0.542587	0.771819	0.995794	0.002103	0.293375	0.481598	0.769716	1	0.001052	0.221872	0.409043	0.663512	0.994742	0.679285	0.068349	0.252366	0.041053	0.045263	0.009474	0.001052	0.277603	0.543638	0.796004	1	0.037855	0.241851	0.42061	0.602524	0.968454	0.019979	0.218717	0.480547	0.701367	0.993691	0.300736	0.263158	0.009464	0.160883	0.377497	0.528917	0.994742	0.462671
0.485537	0.245868	0.268595	0.244306	0.26501	0.140787	0.004132	0.254132	0.508264	0.716942	0.989669	0.006198	0.27686	0.553719	0.809917	0.993802	0.002066	0.188017	0.433884	0.752066	1	0.504132	0.128099	0.367769	0.060041	0.076605	0.00207	0.002066	0.402893	0.628099	0.807851	1	0.012397	0.105372	0.328512	0.433884	0.882231	0.008264	0.216942	0.382231	0.652893	0.985537	0.365702	0.430642	0.008264	0.192149	0.392562	0.727273	0.971074	0.297521
0.34058	0.362319	0.297101	0.243194	0.210526	0.219601	0.005435	0.255435	0.536232	0.797101	0.996377	0.003623	0.28442	0.528986	0.778986	1	0.001812	0.184783	0.427536	0.630435	0.992754	0.467391	0.063406	0.469203	0.019964	0.07804	0.005445	0.001812	0.26087	0.641304	0.824275	1	0.056159	0.068841	0.186594	0.373188	0.615942	0.005435	0.29529	0.461957	0.652174	0.994565	0.496377	0.315789	0.007246	0.217391	0.45471	0.625	0.992754	0.418478
0.391153	0.355064	0.253783	0.235431	0.184149	0.194639	0.005821	0.314319	0.610012	0.798603	0.997672	0.002328	0.237485	0.477299	0.735739	1	0.001164	0.215367	0.400466	0.601863	0.996508	0.473807	0.124563	0.40163	0.050117	0.08042	0.003497	0.001164	0.231665	0.542491	0.759022	1	0.055879	0.243306	0.402794	0.599534	0.976717	0.036088	0.260768	0.522701	0.738068	0.996508	0.423749	0.344988	0.003492	0.215367	0.392317	0.573923	0.996508	0.391153
0.352617	0.311295	0.336088	0.205517	0.230345	0.216552	0.002755	0.239669	0.480716	0.731405	0.991736	0.006887	0.257576	0.517906	0.754821	0.997245	0.001377	0.241047	0.508264	0.761708	1	0.42562	0.23416	0.34022	0.084138	0.062069	0.004138	0.001377	0.241047	0.428375	0.712121	1	0.11157	0.230028	0.487603	0.898072	0.998623	0.008264	0.322314	0.578512	0.750689	0.885675	0.539945	0.377931	0.00551	0.289256	0.512397	0.758953	0.995868	0.327824
0.390572	0.446128	0.1633	0.269815	0.136594	0.141653	0.008418	0.265993	0.537037	0.821549	1	0.003367	0.250842	0.513468	0.708754	0.998316	0.001684	0.215488	0.363636	0.572391	0.838384	0.698653	0.080808	0.220539	0.047218	0.077572	0	0.001684	0.249158	0.510101	0.717172	1	0.055556	0.217172	0.388889	0.538721	0.686869	0.008418	0.265993	0.5	0.845118	0.905724	0.294613	0.306914	0.010101	0.205387	0.355219	0.60101	0.867003	0.469697
0.328244	0.332061	0.339695	0.187739	0.214559	0.226054	0.007634	0.244275	0.515267	0.767176	1	0.015267	0.206107	0.431298	0.71374	0.98855	0.003817	0.263359	0.48855	0.721374	0.996183	0.381679	0.187023	0.431298	0.05364	0.099617	0	0.003817	0.20229	0.423664	0.683206	1	0.125954	0.301527	0.39313	0.614504	0.71374	0.022901	0.255725	0.515267	0.832061	0.992366	0.553435	0.40613	0.030534	0.225191	0.442748	0.641221	0.98855	0.335878
0.39521	0.275449	0.329341	0.210843	0.301205	0.210843	0.017964	0.245509	0.54491	0.826347	1	0.011976	0.203593	0.491018	0.706587	0.922156	0.005988	0.215569	0.461078	0.712575	0.988024	0.365269	0.191617	0.443114	0.060241	0.084337	0	0.005988	0.131737	0.371257	0.664671	1	0.023952	0.305389	0.353293	0.556886	0.820359	0.137725	0.437126	0.658683	0.850299	0.988024	0.407186	0.481928	0.02994	0.239521	0.461078	0.736527	0.988024	0.311377
0.387352	0.304348	0.3083	0.222222	0.238095	0.174603	0.011858	0.26087	0.505929	0.699605	0.972332	0.007905	0.245059	0.474308	0.750988	0.996047	0.003953	0.197628	0.517787	0.802372	1	0.407115	0.26087	0.332016	0.09127	0.059524	0.003968	0.003953	0.328063	0.525692	0.640316	1	0.011858	0.300395	0.743083	0.889328	0.988142	0.055336	0.150198	0.458498	0.667984	0.818182	0.41502	0.380952	0.011858	0.201581	0.399209	0.802372	0.988142	0.312253
0.431373	0.313725	0.254902	0.257426	0.257426	0.128713	0.019608	0.22549	0.45098	0.803922	0.990196	0.039216	0.323529	0.568627	0.696078	1	0.009804	0.137255	0.470588	0.77451	0.95098	0.264706	0.460784	0.27451	0.079208	0.039604	0	0.009804	0.147059	0.784314	0.931373	1	0.019608	0.362745	0.480392	0.617647	0.901961	0.156863	0.215686	0.284314	0.705882	0.77451	0.470588	0.39604	0.039216	0.215686	0.480392	0.696078	0.892157	0.323529
0.328592	0.361309	0.3101	0.270655	0.19943	0.252137	0.008535	0.28734	0.524893	0.780939	0.995733	0.002845	0.201991	0.450925	0.69559	1	0.001422	0.27596	0.523471	0.761024	0.998578	0.409673	0.186344	0.403983	0.086895	0.066952	0.007123	0.001422	0.302987	0.499289	0.796586	1	0.009957	0.186344	0.418208	0.890469	0.997155	0.032717	0.278805	0.550498	0.687055	0.927454	0.536273	0.378917	0.01138	0.26458	0.480797	0.708393	0.998578	0.376956
0.433424	0.338315	0.228261	0.236735	0.165986	0.172789	0.002717	0.173913	0.360054	0.680707	0.991848	0.005435	0.302989	0.535326	0.797554	1	0.001359	0.403533	0.600543	0.773098	0.994565	0.494565	0.127717	0.377717	0.05034	0.088435	0.004082	0.001359	0.186141	0.394022	0.695652	1	0.016304	0.487772	0.701087	0.857337	0.997283	0.021739	0.308424	0.509511	0.767663	0.970109	0.451087	0.304762	0.01087	0.411685	0.58288	0.789402	0.997283	0.407609
0.412969	0.290102	0.296928	0.219178	0.267123	0.174658	0.010239	0.283276	0.542662	0.819113	0.989761	0.006826	0.276451	0.508532	0.672355	1	0.003413	0.1843	0.40273	0.679181	0.993174	0.518771	0.1843	0.296928	0.061644	0.054795	0	0.003413	0.34471	0.713311	0.843003	1	0.03413	0.197952	0.273038	0.52901	0.703072	0.09215	0.16041	0.416382	0.491468	0.921502	0.457338	0.390411	0.017065	0.194539	0.423208	0.610922	0.952218	0.317406
0.415094	0.301887	0.283019	0.272152	0.21519	0.234177	0.012579	0.245283	0.54717	0.792453	1	0.037736	0.257862	0.446541	0.679245	0.987421	0.006289	0.213836	0.471698	0.691824	0.974843	0.27673	0.314465	0.408805	0.050633	0.063291	0.012658	0.006289	0.150943	0.345912	0.742138	1	0.025157	0.610063	0.691824	0.779874	0.861635	0.075472	0.283019	0.408805	0.540881	0.974843	0.402516	0.43038	0.018868	0.301887	0.496855	0.691824	0.981132	0.295597
0.349112	0.352663	0.298225	0.218009	0.204976	0.218009	0.007101	0.23432	0.433136	0.71716	1	0.002367	0.228402	0.491124	0.759763	0.99645	0.001183	0.293491	0.553846	0.757396	0.997633	0.512426	0.102959	0.384615	0.0391	0.074645	0.003555	0.001183	0.247337	0.376331	0.624852	1	0.033136	0.576331	0.700592	0.785799	0.99645	0.00355	0.182249	0.586982	0.804734	0.984615	0.459172	0.381517	0.005917	0.336095	0.583432	0.782249	0.995266	0.391716
0.371901	0.285124	0.342975	0.224066	0.278008	0.182573	0.012397	0.256198	0.582645	0.77686	1	0.008264	0.210744	0.433884	0.652893	0.983471	0.004132	0.227273	0.454545	0.735537	0.987603	0.446281	0.305785	0.247934	0.13278	0.058091	0	0.004132	0.252066	0.471074	0.698347	1	0.115702	0.260331	0.454545	0.72314	0.913223	0.008264	0.086777	0.590909	0.801653	0.983471	0.528926	0.456432	0.016529	0.301653	0.491736	0.739669	0.987603	0.264463
0.328125	0.375	0.296875	0.215686	0.168627	0.215686	0.070312	0.300781	0.519531	0.792969	0.984375	0.007812	0.195312	0.488281	0.71875	0.996094	0.003906	0.191406	0.492188	0.6875	1	0.554688	0.246094	0.199219	0.070588	0.054902	0.007843	0.003906	0.195312	0.476562	0.804688	1	0.015625	0.527344	0.632812	0.757812	0.878906	0.019531	0.199219	0.253906	0.410156	0.972656	0.34375	0.4	0.023438	0.238281	0.5	0.691406	0.972656	0.375
0.449123	0.284211	0.266667	0.253521	0.232394	0.15493	0.007018	0.224561	0.494737	0.722807	0.992982	0.010526	0.245614	0.491228	0.761404	0.975439	0.003509	0.284211	0.508772	0.768421	1	0.421053	0.207018	0.37193	0.070423	0.077465	0	0.003509	0.249123	0.480702	0.701754	1	0.161404	0.333333	0.65614	0.789474	0.922807	0.017544	0.133333	0.491228	0.726316	0.992982	0.336842	0.302817	0.02807	0.305263	0.568421	0.761404	0.996491	0.34386
0.356828	0.330396	0.312775	0.256637	0.212389	0.212389	0.008811	0.202643	0.488987	0.726872	0.991189	0.013216	0.255507	0.54185	0.770925	0.977974	0.004405	0.246696	0.440529	0.678414	1	0.30837	0.101322	0.590308	0.035398	0.115044	0	0.004405	0.14978	0.431718	0.757709	1	0.440529	0.788546	0.845815	0.881057	0.907489	0.017621	0.255507	0.46696	0.629956	0.982379	0.502203	0.353982	0.017621	0.22467	0.431718	0.625551	0.986784	0.295154
0.347162	0.381368	0.27147	0.248361	0.182083	0.207575	0.002183	0.269287	0.502911	0.75837	1	0.002911	0.161572	0.413392	0.713246	0.996361	0.000728	0.385735	0.565502	0.77802	0.998544	0.518923	0.077147	0.40393	0.032775	0.085215	0.003642	0.000728	0.135371	0.342795	0.614265	1	0.03639	0.417031	0.458515	0.611354	0.954876	0.026929	0.47671	0.666667	0.835517	0.998544	0.45706	0.355426	0.004367	0.377729	0.55968	0.756186	0.998544	0.372635
0.413408	0.385475	0.201117	0.292135	0.134831	0.191011	0.011173	0.206704	0.458101	0.73743	0.988827	0.01676	0.324022	0.530726	0.748603	0.994413	0.005587	0.27933	0.452514	0.709497	1	0.670391	0.027933	0.301676	0.011236	0.044944	0	0.005587	0.469274	0.664804	0.832402	1	0.636872	0.636872	0.642458	0.648045	0.659218	0.039106	0.106145	0.24581	0.318436	0.458101	0.329609	0.325843	0.055866	0.26257	0.452514	0.664804	0.972067	0.430168
0.282051	0.389744	0.328205	0.21134	0.201031	0.257732	0.030769	0.307692	0.558974	0.764103	0.994872	0.010256	0.179487	0.425641	0.717949	1	0.005128	0.271795	0.476923	0.774359	0.989744	0.507692	0.4	0.092308	0.139175	0.036082	0.005155	0.005128	0.230769	0.482051	0.717949	1	0.035897	0.210256	0.425641	0.733333	0.933333	0.538462	0.589744	0.615385	0.953846	0.984615	0.512821	0.350515	0.025641	0.25641	0.45641	0.728205	0.989744	0.394872
0.361963	0.343558	0.294479	0.185185	0.185185	0.265432	0.018405	0.190184	0.429448	0.668712	0.98773	0.01227	0.263804	0.582822	0.785276	1	0.006135	0.257669	0.546012	0.766871	0.981595	0.361963	0.104294	0.533742	0.037037	0.08642	0	0.006135	0.08589	0.263804	0.674847	1	0.527607	0.546012	0.705521	0.822086	0.852761	0.122699	0.337423	0.478528	0.760736	0.98773	0.460123	0.358025	0.03681	0.361963	0.588957	0.754601	0.97546	0.349693
0.456522	0.333333	0.210145	0.335766	0.138686	0.189781	0.021739	0.210145	0.442029	0.746377	1	0.014493	0.202899	0.42029	0.644928	0.992754	0.007246	0.369565	0.57971	0.797101	0.971014	0.5	0.318841	0.181159	0.080292	0.080292	0.007299	0.007246	0.253623	0.42029	0.76087	1	0.369565	0.5	0.615942	0.818841	0.956522	0.021739	0.094203	0.137681	0.246377	0.978261	0.326087	0.452555	0.108696	0.268116	0.550725	0.746377	0.971014	0.384058
0.331818	0.336364	0.331818	0.210046	0.246575	0.223744	0.013636	0.231818	0.490909	0.781818	0.995455	0.018182	0.286364	0.454545	0.663636	1	0.004545	0.204545	0.586364	0.759091	0.990909	0.536364	0.145455	0.318182	0.091324	0.073059	0	0.004545	0.277273	0.422727	0.659091	1	0.018182	0.118182	0.618182	0.759091	0.936364	0.05	0.240909	0.586364	0.804545	0.990909	0.513636	0.401826	0.009091	0.309091	0.545455	0.759091	0.990909	0.359091
0.438326	0.356828	0.204846	0.324503	0.183223	0.134658	0.006608	0.185022	0.453744	0.720264	0.997797	0.004405	0.251101	0.45815	0.737885	0.993392	0.002203	0.414097	0.610132	0.810573	1	0.464758	0.218062	0.317181	0.081678	0.081678	0.002208	0.002203	0.207048	0.440529	0.740088	1	0.048458	0.286344	0.513216	0.73348	0.991189	0.008811	0.253304	0.537445	0.757709	0.993392	0.433921	0.322296	0.008811	0.244493	0.484581	0.73348	0.993392	0.400881
0.418605	0.348837	0.232558	0.3125	0.226562	0.1875	0.062016	0.325581	0.573643	0.821705	1	0.015504	0.186047	0.472868	0.744186	0.992248	0.007752	0.193798	0.410853	0.542636	0.945736	0.534884	0.139535	0.325581	0.0625	0.078125	0	0.007752	0.302326	0.697674	0.829457	1	0.023256	0.108527	0.147287	0.503876	0.914729	0.209302	0.27907	0.44186	0.565891	0.651163	0.387597	0.421875	0.015504	0.155039	0.372093	0.627907	0.829457	0.333333
0.463158	0.305263	0.231579	0.287234	0.212766	0.138298	0.031579	0.178947	0.421053	0.631579	1	0.021053	0.4	0.642105	0.810526	0.989474	0.010526	0.252632	0.463158	0.694737	0.926316	0.2	0.010526	0.789474	0.021277	0.06383	0	0.010526	0.431579	0.694737	0.947368	1	0.705263	0.705263	0.705263	0.705263	0.705263	0.042105	0.221053	0.421053	0.652632	0.926316	0.273684	0.382979	0.042105	0.336842	0.568421	0.694737	0.926316	0.336842
0.438776	0.255102	0.306122	0.268041	0.309278	0.123711	0.030612	0.193878	0.530612	0.714286	0.989796	0.081633	0.295918	0.428571	0.673469	0.979592	0.010204	0.22449	0.469388	0.755102	1	0.459184	0.408163	0.132653	0.092784	0.051546	0.010309	0.010204	0.193878	0.602041	0.714286	1	0.204082	0.336735	0.5	0.72449	0.908163	0.061224	0.081633	0.132653	0.918367	0.959184	0.336735	0.453608	0.040816	0.27551	0.44898	0.734694	0.969388	0.234694
0.270548	0.428082	0.30137	0.213058	0.182131	0.254296	0.013699	0.277397	0.558219	0.773973	1	0.006849	0.208904	0.462329	0.705479	0.989726	0.003425	0.284247	0.510274	0.739726	0.996575	0.428082	0.164384	0.407534	0.04811	0.082474	0	0.003425	0.14726	0.424658	0.691781	1	0.232877	0.383562	0.462329	0.657534	0.743151	0.085616	0.287671	0.554795	0.842466	0.993151	0.534247	0.398625	0.013699	0.263699	0.486301	0.671233	0.986301	0.462329
0.422018	0.192661	0.385321	0.12963	0.305556	0.148148	0.018349	0.165138	0.449541	0.642202	1	0.174312	0.348624	0.431193	0.697248	0.899083	0.009174	0.247706	0.577982	0.770642	0.990826	0.385321	0.174312	0.440367	0.046296	0.064815	0.009259	0.009174	0.091743	0.330275	0.724771	1	0.247706	0.275229	0.385321	0.431193	0.779817	0.100917	0.477064	0.587156	0.87156	0.981651	0.477064	0.37037	0.06422	0.376147	0.541284	0.752294	0.990826	0.165138
0.398438	0.328125	0.273438	0.251969	0.220472	0.15748	0.023438	0.25	0.5	0.742188	0.976562	0.015625	0.28125	0.539062	0.796875	0.992188	0.007812	0.148438	0.335938	0.632812	1	0.3125	0.21875	0.46875	0.07874	0.062992	0.015748	0.007812	0.265625	0.421875	0.734375	1	0.03125	0.078125	0.382812	0.484375	0.71875	0.125	0.234375	0.648438	0.859375	0.976562	0.40625	0.362205	0.03125	0.179688	0.40625	0.609375	0.8125	0.375
0.37037	0.422222	0.207407	0.358209	0.171642	0.134328	0.022222	0.274074	0.518519	0.740741	1	0.014815	0.162963	0.348148	0.644444	0.992593	0.007407	0.481481	0.62963	0.837037	0.97037	0.533333	0.340741	0.125926	0.074627	0.074627	0.014925	0.007407	0.266667	0.4	0.755556	1	0.22963	0.474074	0.6	0.718519	0.955556	0.02963	0.088889	0.118519	0.148148	0.977778	0.377778	0.492537	0.081481	0.244444	0.488889	0.725926	0.97037	0.42963
0.22449	0.462585	0.312925	0.205479	0.136986	0.287671	0.034014	0.217687	0.346939	0.496599	0.986395	0.013605	0.367347	0.659864	0.85034	0.993197	0.006803	0.197279	0.442177	0.612245	1	0.632653	0.312925	0.054422	0.061644	0.020548	0.006849	0.006803	0.37415	0.680272	0.836735	1	0.088435	0.183673	0.29932	0.44898	0.557823	0.020408	0.027211	0.040816	0.489796	0.503401	0.612245	0.315068	0.040816	0.251701	0.52381	0.727891	0.979592	0.462585
0.308989	0.382022	0.308989	0.259887	0.20904	0.259887	0.016854	0.235955	0.494382	0.831461	1	0.011236	0.314607	0.52809	0.719101	0.983146	0.005618	0.202247	0.426966	0.646067	0.966292	0.421348	0.38764	0.191011	0.158192	0.022599	0	0.005618	0.207865	0.573034	0.865169	1	0.050562	0.191011	0.488764	0.651685	0.97191	0.331461	0.370787	0.421348	0.792135	0.842697	0.438202	0.497175	0.022472	0.292135	0.477528	0.651685	0.955056	0.337079
0.281893	0.465021	0.253086	0.226804	0.152577	0.249485	0.00823	0.240741	0.419753	0.769547	0.995885	0.004115	0.271605	0.549383	0.746914	1	0.002058	0.211934	0.471193	0.734568	0.979424	0.633745	0.158436	0.207819	0.061856	0.065979	0	0.002058	0.251029	0.567901	0.736626	1	0.004115	0.179012	0.366255	0.465021	0.979424	0.13786	0.290123	0.487654	0.790123	0.950617	0.580247	0.247423	0.006173	0.403292	0.611111	0.771605	0.979424	0.465021
0.389831	0.336158	0.274011	0.271955	0.229462	0.164306	0.016949	0.248588	0.471751	0.737288	1	0.00565	0.279661	0.550847	0.779661	0.997175	0.002825	0.206215	0.463277	0.683616	0.99435	0.562147	0.163842	0.274011	0.062323	0.056657	0.005666	0.002825	0.30791	0.528249	0.816384	1	0.090395	0.149718	0.542373	0.70339	0.799435	0.016949	0.234463	0.347458	0.728814	0.867232	0.412429	0.373938	0.025424	0.228814	0.432203	0.686441	0.988701	0.384181
0.35284	0.337349	0.309811	0.237931	0.203448	0.218966	0.008606	0.32358	0.537005	0.753873	0.998279	0.006885	0.199656	0.500861	0.777969	1	0.001721	0.239243	0.432014	0.703959	0.996558	0.447504	0.170396	0.3821	0.067241	0.081034	0.005172	0.001721	0.173838	0.435456	0.784854	1	0.012048	0.211704	0.493976	0.738382	0.907057	0.089501	0.313253	0.526678	0.714286	0.958692	0.564544	0.324138	0.005164	0.246127	0.487091	0.707401	0.958692	0.380379
0.465347	0.217822	0.316832	0.18	0.29	0.1	0.029703	0.277228	0.544554	0.782178	1	0.128713	0.168317	0.316832	0.60396	0.841584	0.009901	0.237624	0.514851	0.742574	0.990099	0.425743	0.287129	0.287129	0.12	0.06	0	0.009901	0.178218	0.643564	0.792079	1	0.29703	0.544554	0.613861	0.821782	0.950495	0.049505	0.108911	0.237624	0.435644	0.514851	0.376238	0.4	0.079208	0.178218	0.465347	0.613861	0.960396	0.188119
0.32439	0.346341	0.329268	0.200244	0.238095	0.234432	0.002439	0.273171	0.55122	0.787805	1	0.004878	0.218293	0.45122	0.709756	0.996341	0.00122	0.260976	0.507317	0.752439	0.99878	0.468293	0.242683	0.289024	0.107448	0.051282	0.002442	0.00122	0.210976	0.464634	0.740244	1	0.037805	0.202439	0.420732	0.80122	0.99878	0.006098	0.32439	0.541463	0.702439	0.992683	0.559756	0.398046	0.003659	0.265854	0.47439	0.74878	0.99878	0.371951
0.349372	0.332636	0.317992	0.234801	0.232704	0.192872	0.004184	0.177824	0.472803	0.723849	1	0.01046	0.330544	0.600418	0.834728	0.997908	0.002092	0.232218	0.439331	0.646444	0.972803	0.539749	0.123431	0.33682	0.052411	0.056604	0.002096	0.002092	0.320084	0.608787	0.834728	1	0.016736	0.23431	0.328452	0.650628	0.972803	0.006276	0.154812	0.399582	0.575314	0.799163	0.543933	0.343816	0.006276	0.286611	0.479079	0.73431	0.979079	0.368201
0.367965	0.324675	0.307359	0.208696	0.265217	0.217391	0.012987	0.272727	0.502165	0.718615	1	0.008658	0.212121	0.484848	0.757576	0.987013	0.004329	0.225108	0.489177	0.748918	0.995671	0.376623	0.233766	0.38961	0.086957	0.052174	0	0.004329	0.225108	0.489177	0.831169	1	0.04329	0.251082	0.497835	0.731602	0.965368	0.116883	0.207792	0.467532	0.649351	0.874459	0.532468	0.452174	0.021645	0.229437	0.515152	0.748918	0.969697	0.320346
0.385827	0.254593	0.35958	0.184211	0.305263	0.194737	0.005249	0.199475	0.493438	0.748031	0.994751	0.018373	0.312336	0.496063	0.771654	0.965879	0.002625	0.233596	0.480315	0.716535	1	0.367454	0.24147	0.391076	0.073684	0.073684	0	0.002625	0.330709	0.553806	0.83727	1	0.007874	0.146982	0.39895	0.511811	0.860892	0.065617	0.265092	0.598425	0.748031	0.989501	0.606299	0.421053	0.010499	0.270341	0.519685	0.740157	0.992126	0.275591
0.299258	0.459604	0.241138	0.276289	0.12701	0.23134	0.001649	0.273289	0.622836	0.805853	0.999588	0.000824	0.248557	0.471558	0.702391	1	0.000412	0.234542	0.459604	0.686727	0.998763	0.73413	0.064303	0.201566	0.036289	0.065979	0.002474	0.000412	0.210635	0.402721	0.681781	1	0.037923	0.560594	0.607997	0.677659	0.998763	0.002061	0.430338	0.736191	0.838829	0.981451	0.363561	0.256495	0.002061	0.334295	0.435697	0.642209	0.998763	0.472795
0.32526	0.404844	0.269896	0.253472	0.170139	0.21875	0.013841	0.245675	0.49827	0.799308	0.99308	0.00692	0.249135	0.515571	0.712803	0.99654	0.00346	0.231834	0.439446	0.723183	1	0.709343	0.155709	0.134948	0.090278	0.055556	0.006944	0.00346	0.33564	0.553633	0.740484	1	0.089965	0.217993	0.283737	0.854671	0.989619	0.017301	0.183391	0.311419	0.401384	0.979239	0.588235	0.319444	0.024221	0.342561	0.567474	0.726644	0.989619	0.370242
0.313576	0.414914	0.271511	0.247126	0.166667	0.222222	0.007648	0.258126	0.48566	0.739962	0.99044	0.003824	0.225621	0.491396	0.764818	1	0.001912	0.263862	0.527725	0.726577	0.998088	0.669216	0.152964	0.17782	0.061303	0.05364	0	0.001912	0.246654	0.535373	0.808795	1	0.00956	0.208413	0.374761	0.608031	0.996176	0.128107	0.342256	0.483748	0.694073	0.982792	0.479924	0.321839	0.005736	0.3174	0.602294	0.814532	0.998088	0.409178
0.365591	0.301075	0.333333	0.204545	0.273923	0.22488	0.002389	0.281959	0.53644	0.76822	0.998805	0.004779	0.222222	0.452808	0.74552	1	0.001195	0.212664	0.477897	0.732378	0.997611	0.476703	0.23178	0.291517	0.09689	0.061005	0.003589	0.001195	0.23417	0.485066	0.739546	1	0.037037	0.194743	0.41816	0.801673	0.997611	0.005974	0.309438	0.55914	0.714456	0.991637	0.549582	0.397129	0.003584	0.264038	0.474313	0.749104	0.997611	0.339307
0.395722	0.315508	0.28877	0.241935	0.268817	0.123656	0.010695	0.294118	0.55615	0.786096	1	0.026738	0.160428	0.395722	0.727273	0.962567	0.005348	0.235294	0.518717	0.705882	0.994652	0.411765	0.085561	0.502674	0.05914	0.080645	0.005376	0.005348	0.197861	0.44385	0.684492	1	0.139037	0.176471	0.299465	0.320856	0.989305	0.032086	0.374332	0.566845	0.775401	0.967914	0.411765	0.397849	0.02139	0.165775	0.385027	0.657754	0.983957	0.347594
0.367188	0.3125	0.320312	0.247059	0.239216	0.203922	0.015625	0.230469	0.5	0.695312	0.996094	0.007812	0.261719	0.546875	0.808594	1	0.003906	0.226562	0.472656	0.710938	0.992188	0.359375	0.121094	0.519531	0.058824	0.098039	0.003922	0.003906	0.136719	0.492188	0.753906	1	0.015625	0.152344	0.273438	0.644531	0.78125	0.027344	0.3125	0.527344	0.8125	0.992188	0.515625	0.376471	0.019531	0.222656	0.433594	0.71875	0.878906	0.320312
0.40367	0.275229	0.321101	0.203704	0.25	0.222222	0.027523	0.302752	0.633028	0.816514	1	0.018349	0.211009	0.53211	0.678899	0.990826	0.009174	0.201835	0.394495	0.577982	0.981651	0.522936	0.302752	0.174312	0.101852	0.046296	0.027778	0.009174	0.275229	0.669725	0.798165	1	0.201835	0.302752	0.40367	0.504587	0.926606	0.073394	0.100917	0.146789	0.53211	0.908257	0.449541	0.314815	0.06422	0.247706	0.40367	0.559633	0.981651	0.284404
0.345291	0.340807	0.313901	0.256757	0.207207	0.193694	0.03139	0.26009	0.493274	0.766816	1	0.008969	0.269058	0.538117	0.780269	0.995516	0.004484	0.201794	0.426009	0.681614	0.977578	0.457399	0.103139	0.439462	0.04955	0.094595	0.004505	0.004484	0.125561	0.300448	0.623318	1	0.013453	0.179372	0.641256	0.668161	0.713004	0.165919	0.443946	0.587444	0.807175	0.991031	0.484305	0.459459	0.017937	0.309417	0.506726	0.748879	0.982063	0.358744
0.267857	0.487013	0.24513	0.214634	0.120325	0.253659	0.00487	0.224026	0.449675	0.775974	0.993506	0.003247	0.267857	0.540584	0.727273	0.996753	0.001623	0.23539	0.465909	0.709416	1	0.714286	0.097403	0.188312	0.053659	0.043902	0.001626	0.001623	0.279221	0.599026	0.805195	1	0.012987	0.238636	0.363636	0.456169	0.965909	0.035714	0.206169	0.308442	0.491883	0.988636	0.452922	0.360976	0.01461	0.232143	0.464286	0.668831	0.998377	0.48539
0.359375	0.317708	0.322917	0.230366	0.209424	0.26178	0.020833	0.244792	0.46875	0.755208	0.963542	0.010417	0.229167	0.489583	0.703125	0.989583	0.005208	0.25	0.510417	0.75	1	0.46875	0.208333	0.322917	0.109948	0.057592	0.005236	0.005208	0.317708	0.567708	0.713542	1	0.161458	0.338542	0.463542	0.755208	0.994792	0.015625	0.109375	0.307292	0.822917	0.96875	0.484375	0.460733	0.026042	0.270833	0.505208	0.734375	0.994792	0.307292
0.341818	0.298182	0.36	0.193078	0.271403	0.214936	0.003636	0.267273	0.512727	0.769091	1	0.012727	0.201818	0.445455	0.66	0.996364	0.001818	0.292727	0.529091	0.778182	0.992727	0.425455	0.085455	0.489091	0.041894	0.081967	0.001821	0.001818	0.256364	0.427273	0.650909	1	0.005455	0.214545	0.34	0.534545	0.612727	0.04	0.309091	0.643636	0.807273	0.996364	0.572727	0.404372	0.007273	0.232727	0.529091	0.730909	0.996364	0.336364
0.411765	0.309598	0.278638	0.26087	0.267081	0.167702	0.009288	0.244582	0.50774	0.798762	0.996904	0.006192	0.272446	0.473684	0.696594	0.96904	0.003096	0.232198	0.501548	0.721362	1	0.448916	0.151703	0.399381	0.055901	0.068323	0	0.003096	0.417957	0.640867	0.764706	1	0.099071	0.145511	0.393189	0.55418	0.869969	0.012384	0.20743	0.365325	0.795666	0.990712	0.396285	0.416149	0.021672	0.226006	0.408669	0.55418	0.98452	0.417957
0.349034	0.30314	0.347826	0.200726	0.243047	0.229746	0.002415	0.248792	0.486715	0.7343	1	0.003623	0.258454	0.492754	0.745169	0.992754	0.001208	0.227053	0.503623	0.76087	0.998792	0.477053	0.2343	0.288647	0.099154	0.053204	0.002418	0.001208	0.204106	0.431159	0.733092	1	0.043478	0.205314	0.443237	0.806763	0.998792	0.013285	0.352657	0.561594	0.724638	0.992754	0.561594	0.406288	0.004831	0.256039	0.481884	0.742754	0.998792	0.31401
0.334764	0.347639	0.317597	0.215517	0.211207	0.25	0.017167	0.309013	0.506438	0.738197	1	0.008584	0.23176	0.429185	0.716738	0.991416	0.004292	0.2103	0.527897	0.776824	0.995708	0.540773	0.27897	0.180258	0.094828	0.051724	0.008621	0.004292	0.167382	0.381974	0.622318	1	0.042918	0.334764	0.695279	0.793991	0.991416	0.021459	0.44206	0.540773	0.583691	0.961373	0.416309	0.396552	0.021459	0.227468	0.527897	0.776824	0.957082	0.347639
0.342395	0.326231	0.331374	0.210294	0.2125	0.236765	0.00147	0.271859	0.502572	0.755327	1	0.002939	0.229243	0.481999	0.722998	0.997796	0.000735	0.23953	0.509184	0.762675	0.995591	0.533431	0.366642	0.099927	0.118382	0.031618	0.008088	0.000735	0.237325	0.459956	0.710507	1	0.008817	0.262307	0.506245	0.76047	0.927259	0.002939	0.316679	0.578986	0.954445	0.994857	0.609111	0.308824	0.002204	0.261572	0.515062	0.747979	0.995591	0.3446
0.388298	0.340426	0.271277	0.261333	0.210667	0.165333	0.007979	0.319149	0.510638	0.771277	1	0.005319	0.239362	0.473404	0.718085	0.992021	0.00266	0.18883	0.56117	0.74734	0.99734	0.523936	0.180851	0.295213	0.104	0.066667	0.002667	0.00266	0.337766	0.529255	0.792553	1	0.148936	0.582447	0.702128	0.784574	0.981383	0.007979	0.114362	0.255319	0.462766	0.885638	0.412234	0.336	0.010638	0.204787	0.569149	0.744681	0.99734	0.37766
0.368056	0.361111	0.270833	0.265734	0.20979	0.174825	0.020833	0.256944	0.534722	0.736111	0.965278	0.041667	0.201389	0.368056	0.597222	1	0.006944	0.388889	0.611111	0.833333	0.993056	0.631944	0.1875	0.180556	0.062937	0.062937	0.006993	0.006944	0.166667	0.326389	0.513889	1	0.131944	0.548611	0.805556	0.875	0.923611	0.027778	0.5625	0.666667	0.9375	0.986111	0.409722	0.405594	0.027778	0.284722	0.4375	0.729167	0.979167	0.375
0.330579	0.342975	0.326446	0.257261	0.19917	0.219917	0.016529	0.231405	0.520661	0.768595	0.991736	0.012397	0.293388	0.508264	0.780992	1	0.004132	0.18595	0.438017	0.677686	0.995868	0.326446	0.090909	0.582645	0.037344	0.095436	0.004149	0.004132	0.173554	0.392562	0.772727	1	0.165289	0.793388	0.847107	0.867769	0.900826	0.049587	0.280992	0.483471	0.644628	0.983471	0.512397	0.373444	0.008264	0.247934	0.438017	0.64876	0.987603	0.326446
0.327586	0.327586	0.344828	0.226087	0.26087	0.226087	0.017241	0.258621	0.491379	0.715517	0.982759	0.025862	0.163793	0.508621	0.741379	0.939655	0.008621	0.241379	0.474138	0.732759	1	0.215517	0.405172	0.37931	0.043478	0.06087	0.026087	0.008621	0.137931	0.37931	0.577586	1	0.077586	0.655172	0.758621	0.87931	0.982759	0.051724	0.224138	0.353448	0.491379	0.62931	0.474138	0.486957	0.068966	0.241379	0.474138	0.689655	0.965517	0.327586
0.335165	0.412088	0.252747	0.331492	0.165746	0.20442	0.027473	0.192308	0.423077	0.664835	0.994505	0.016484	0.291209	0.587912	0.840659	1	0.005495	0.225275	0.456044	0.631868	0.989011	0.587912	0.175824	0.236264	0.077348	0.044199	0	0.005495	0.208791	0.483516	0.807692	1	0.043956	0.357143	0.516484	0.576923	0.747253	0.17033	0.258242	0.318681	0.67033	0.912088	0.423077	0.375691	0.049451	0.258242	0.412088	0.593407	0.972527	0.417582
0.354331	0.314961	0.330709	0.246032	0.285714	0.18254	0.015748	0.204724	0.464567	0.724409	1	0.086614	0.275591	0.480315	0.795276	0.984252	0.007874	0.23622	0.511811	0.700787	0.952756	0.472441	0.488189	0.03937	0.15873	0.015873	0	0.007874	0.307087	0.543307	0.795276	1	0.102362	0.251969	0.488189	0.700787	0.937008	0.023622	0.023622	0.031496	0.03937	0.055118	0.370079	0.47619	0.031496	0.181102	0.456693	0.700787	0.952756	0.354331
0.395105	0.347902	0.256993	0.276708	0.194396	0.206655	0.036713	0.211538	0.38986	0.706294	1	0.003497	0.269231	0.538462	0.77972	0.998252	0.001748	0.323427	0.554196	0.76049	0.996503	0.174825	0.054196	0.770979	0.019264	0.057793	0.005254	0.001748	0.512238	0.711538	0.840909	1	0.45979	0.486014	0.536713	0.91958	0.986014	0.006993	0.202797	0.398601	0.692308	0.996503	0.454545	0.392294	0.005245	0.403846	0.606643	0.800699	0.993007	0.367133
0.379705	0.333879	0.286416	0.211475	0.213115	0.185246	0.00982	0.247136	0.479542	0.728314	1	0.003273	0.237316	0.513912	0.782324	0.99509	0.001637	0.256956	0.500818	0.736498	0.996727	0.481178	0.212766	0.306056	0.091803	0.068852	0.003279	0.001637	0.212766	0.479542	0.746318	1	0.006547	0.201309	0.404255	0.649755	0.944354	0.070376	0.376432	0.585925	0.833061	0.991817	0.443535	0.337705	0.006547	0.268412	0.543372	0.762684	0.996727	0.322422
0.297143	0.411429	0.291429	0.293103	0.172414	0.201149	0.022857	0.365714	0.571429	0.805714	1	0.011429	0.194286	0.377143	0.691429	0.994286	0.005714	0.245714	0.497143	0.754286	0.971429	0.28	0.28	0.44	0.04023	0.109195	0.017241	0.005714	0.154286	0.285714	0.588571	1	0.234286	0.76	0.828571	0.908571	0.982857	0.011429	0.2	0.445714	0.577143	0.748571	0.445714	0.505747	0.017143	0.262857	0.497143	0.691429	0.971429	0.434286
0.378788	0.32197	0.299242	0.231499	0.214421	0.201139	0.003788	0.17803	0.410985	0.714015	1	0.017045	0.219697	0.450758	0.727273	0.996212	0.001894	0.420455	0.600379	0.778409	0.998106	0.549242	0.142045	0.308712	0.051233	0.062619	0.005693	0.001894	0.136364	0.278409	0.619318	1	0.214015	0.524621	0.67803	0.844697	0.9375	0.295455	0.44697	0.604167	0.808712	0.994318	0.488636	0.349146	0.00947	0.390152	0.57197	0.791667	0.994318	0.340909
0.306159	0.519928	0.173913	0.255898	0.098004	0.179673	0.005435	0.213768	0.568841	0.894928	1	0.003623	0.32971	0.512681	0.679348	0.998188	0.001812	0.188406	0.356884	0.67029	0.869565	0.748188	0.067029	0.184783	0.029038	0.043557	0	0.001812	0.311594	0.498188	0.684783	1	0.012681	0.134058	0.197464	0.230072	0.873188	0.028986	0.257246	0.802536	0.858696	0.994565	0.375	0.290381	0.007246	0.175725	0.396739	0.686594	0.994565	0.54529
0.324841	0.469214	0.205945	0.234043	0.134043	0.174468	0.006369	0.218684	0.41189	0.647558	1	0.012739	0.397028	0.636943	0.823779	0.995754	0.002123	0.133758	0.318471	0.564756	0.974522	0.683652	0.144374	0.171975	0.061702	0.048936	0.002128	0.002123	0.36518	0.622081	0.815287	1	0.070064	0.159236	0.269639	0.360934	0.974522	0.04034	0.178344	0.309979	0.456476	0.794055	0.484076	0.323404	0.065817	0.326964	0.539278	0.683652	0.976645	0.454352
0.415873	0.260317	0.32381	0.191083	0.321656	0.178344	0.009524	0.273016	0.520635	0.726984	1	0.019048	0.184127	0.422222	0.75873	0.993651	0.003175	0.247619	0.501587	0.777778	0.996825	0.212698	0.066667	0.720635	0.041401	0.079618	0.003185	0.003175	0.184127	0.412698	0.539683	1	0.11746	0.396825	0.485714	0.533333	0.996825	0.012698	0.263492	0.565079	0.755556	0.971429	0.450794	0.528662	0.012698	0.212698	0.47619	0.777778	0.996825	0.307937
0.323484	0.412131	0.264386	0.260125	0.165109	0.266355	0.00311	0.211509	0.438569	0.727838	1	0.006221	0.264386	0.513219	0.744946	0.99689	0.001555	0.261275	0.531882	0.77916	0.990669	0.525661	0.111975	0.362364	0.101246	0.095016	0.010903	0.001555	0.227061	0.438569	0.741835	1	0.066874	0.276827	0.528771	0.734059	0.970451	0.031104	0.311042	0.539658	0.755832	0.968896	0.342146	0.507788	0.018663	0.258165	0.517885	0.755832	0.987558	0.421462
0.356164	0.383562	0.260274	0.282759	0.186207	0.2	0.041096	0.212329	0.506849	0.739726	0.972603	0.013699	0.239726	0.445205	0.712329	0.986301	0.006849	0.246575	0.59589	0.780822	1	0.486301	0.212329	0.30137	0.068966	0.055172	0	0.006849	0.267123	0.390411	0.650685	1	0.184932	0.458904	0.609589	0.80137	0.890411	0.034247	0.10274	0.541096	0.69863	0.965753	0.315068	0.441379	0.075342	0.438356	0.589041	0.760274	0.979452	0.363014
0.459916	0.232068	0.308017	0.211864	0.292373	0.161017	0.012658	0.248945	0.489451	0.751055	1	0.008439	0.261603	0.438819	0.662447	0.995781	0.004219	0.21519	0.523207	0.767932	0.978903	0.362869	0.177215	0.459916	0.04661	0.072034	0.004237	0.004219	0.206751	0.35443	0.7173	1	0.016878	0.080169	0.160338	0.248945	0.734177	0.362869	0.493671	0.628692	0.801688	0.974684	0.333333	0.466102	0.033755	0.244726	0.514768	0.742616	0.978903	0.265823
0.336879	0.347518	0.315603	0.216696	0.218472	0.220249	0.003546	0.264184	0.535461	0.785461	1	0.005319	0.216312	0.475177	0.760638	0.998227	0.001773	0.248227	0.468085	0.705674	0.992908	0.400709	0.078014	0.521277	0.033748	0.104796	0.001776	0.001773	0.175532	0.475177	0.771277	1	0.005319	0.322695	0.466312	0.567376	0.636525	0.039007	0.260638	0.530142	0.753546	0.968085	0.498227	0.408526	0.007092	0.312057	0.501773	0.671986	0.992908	0.393617
0.389247	0.384946	0.225806	0.25	0.200431	0.176724	0.006452	0.219355	0.498925	0.744086	1	0.004301	0.28172	0.56129	0.767742	0.995699	0.002151	0.23871	0.43871	0.660215	0.997849	0.677419	0.094624	0.227957	0.036638	0.040948	0.006466	0.002151	0.27957	0.595699	0.804301	1	0.283871	0.322581	0.436559	0.834409	0.926882	0.032258	0.126882	0.329032	0.486022	0.802151	0.408602	0.37931	0.012903	0.24086	0.443011	0.724731	0.989247	0.380645
0.326316	0.397895	0.275789	0.225738	0.166667	0.202532	0.016842	0.176842	0.376842	0.682105	0.981053	0.004211	0.269474	0.496842	0.728421	1	0.002105	0.357895	0.608421	0.821053	0.987368	0.530526	0.454737	0.014737	0.168776	0.004219	0	0.002105	0.16	0.44	0.726316	1	0.101053	0.355789	0.564211	0.776842	0.995789	0.006316	0.006316	0.010526	0.014737	0.018947	0.557895	0.371308	0.010526	0.324211	0.541053	0.741053	0.997895	0.425263
0.367816	0.275862	0.356322	0.255814	0.290698	0.186047	0.034483	0.252874	0.482759	0.770115	1	0.126437	0.275862	0.574713	0.747126	0.965517	0.011494	0.114943	0.413793	0.643678	0.988506	0.448276	0.321839	0.229885	0.139535	0.046512	0	0.011494	0.229885	0.643678	0.793103	1	0.045977	0.298851	0.597701	0.816092	0.954023	0.137931	0.183908	0.390805	0.448276	0.505747	0.367816	0.418605	0.045977	0.206897	0.45977	0.62069	0.977011	0.321839
0.359929	0.41844	0.221631	0.309059	0.152753	0.179396	0.005319	0.274823	0.489362	0.696809	0.996454	0.003546	0.265957	0.512411	0.72695	1	0.001773	0.189716	0.446809	0.810284	0.992908	0.638298	0.171986	0.189716	0.065719	0.044405	0.005329	0.001773	0.317376	0.491135	0.656028	1	0.019504	0.147163	0.324468	0.812057	0.994681	0.04078	0.191489	0.693262	0.886525	0.978723	0.379433	0.294849	0.01773	0.230496	0.402482	0.803191	0.994681	0.409574
0.389655	0.310345	0.3	0.269896	0.217993	0.17301	0.013793	0.227586	0.489655	0.768966	1	0.010345	0.258621	0.531034	0.827586	0.996552	0.003448	0.237931	0.475862	0.665517	0.965517	0.503448	0.251724	0.244828	0.117647	0.062284	0	0.003448	0.265517	0.534483	0.831034	1	0.113793	0.237931	0.396552	0.610345	0.768966	0.02069	0.093103	0.524138	0.796552	0.92069	0.444828	0.373702	0.031034	0.265517	0.424138	0.634483	0.982759	0.355172
0.395904	0.331058	0.273038	0.270548	0.226027	0.167808	0.010239	0.228669	0.484642	0.764505	1	0.006826	0.204778	0.457338	0.59727	0.989761	0.003413	0.327645	0.641638	0.819113	0.996587	0.546075	0.201365	0.25256	0.085616	0.065068	0.003425	0.003413	0.255973	0.498294	0.641638	1	0.068259	0.191126	0.242321	0.720137	0.955631	0.013652	0.416382	0.682594	0.849829	0.993174	0.409556	0.349315	0.017065	0.423208	0.607509	0.8157	0.996587	0.34471
0.391892	0.314189	0.293919	0.216949	0.250847	0.162712	0.006757	0.280405	0.469595	0.783784	0.986486	0.016892	0.209459	0.439189	0.685811	0.996622	0.003378	0.222973	0.557432	0.756757	1	0.5	0.125	0.375	0.054237	0.067797	0	0.003378	0.202703	0.415541	0.641892	1	0.064189	0.162162	0.219595	0.310811	0.574324	0.10473	0.587838	0.692568	0.861486	0.97973	0.452703	0.40678	0.016892	0.256757	0.547297	0.722973	0.989865	0.35473
0.401544	0.216216	0.382239	0.162791	0.302326	0.170543	0.007722	0.23166	0.46332	0.752896	0.992278	0.015444	0.339768	0.552124	0.683398	0.980695	0.003861	0.250965	0.486486	0.764479	1	0.389961	0.185328	0.42471	0.054264	0.093023	0	0.003861	0.158301	0.409266	0.675676	1	0.135135	0.305019	0.3861	0.610039	0.706564	0.030888	0.262548	0.517375	0.830116	0.988417	0.548263	0.44186	0.015444	0.23166	0.474903	0.675676	0.980695	0.235521
0.448878	0.361596	0.189526	0.254682	0.153558	0.139825	0.003741	0.157107	0.38404	0.690773	1	0.002494	0.34414	0.59601	0.793017	0.995012	0.001247	0.305486	0.493766	0.680798	0.997506	0.715711	0.088529	0.195761	0.036205	0.041199	0.001248	0.001247	0.183292	0.418953	0.724439	1	0.314214	0.452618	0.571072	0.63217	0.796758	0.032419	0.391521	0.684539	0.886534	0.997506	0.273067	0.277154	0.23192	0.452618	0.598504	0.721945	0.993766	0.392768
0.359667	0.334719	0.305613	0.227083	0.235417	0.216667	0.02079	0.243243	0.471933	0.742204	0.989605	0.004158	0.266112	0.588358	0.844075	1	0.002079	0.234927	0.449064	0.650728	0.991684	0.403326	0.367983	0.22869	0.095833	0.058333	0.020833	0.002079	0.22869	0.50104	0.735967	1	0.02079	0.261954	0.463617	0.663202	0.898129	0.039501	0.245322	0.596674	0.900208	0.991684	0.440748	0.4	0.006237	0.27027	0.474012	0.677755	0.991684	0.367983
0.404624	0.289017	0.306358	0.244186	0.255814	0.180233	0.011561	0.260116	0.433526	0.705202	0.988439	0.046243	0.231214	0.624277	0.803468	1	0.00578	0.179191	0.445087	0.67052	0.976879	0.369942	0.265896	0.364162	0.104651	0.05814	0.011628	0.00578	0.138728	0.508671	0.722543	1	0.011561	0.208092	0.526012	0.757225	0.843931	0.144509	0.294798	0.387283	0.606936	0.988439	0.364162	0.465116	0.017341	0.179191	0.456647	0.676301	0.976879	0.289017
0.445652	0.206522	0.347826	0.175824	0.318681	0.153846	0.021739	0.206522	0.5	0.76087	1	0.119565	0.326087	0.554348	0.684783	0.891304	0.01087	0.195652	0.413043	0.73913	0.956522	0.423913	0.521739	0.054348	0.10989	0.021978	0.021978	0.01087	0.26087	0.48913	0.717391	1	0.065217	0.336957	0.521739	0.771739	0.978261	0.054348	0.054348	0.086957	0.097826	0.119565	0.369565	0.505495	0.065217	0.26087	0.478261	0.728261	0.967391	0.195652
0.257692	0.498077	0.244231	0.22158	0.132948	0.204239	0.021154	0.280769	0.488462	0.676923	0.994231	0.003846	0.201923	0.492308	0.767308	1	0.001923	0.284615	0.513462	0.775	0.998077	0.675	0.130769	0.194231	0.05395	0.026975	0.011561	0.001923	0.213462	0.582692	0.763462	1	0.007692	0.321154	0.455769	0.901923	0.996154	0.063462	0.236538	0.373077	0.544231	0.990385	0.551923	0.308285	0.005769	0.278846	0.525	0.705769	0.998077	0.526923
0.270833	0.34375	0.385417	0.2	0.221053	0.284211	0.020833	0.166667	0.364583	0.614583	0.979167	0.041667	0.25	0.552083	0.71875	0.96875	0.010417	0.28125	0.5	0.802083	1	0.46875	0.322917	0.208333	0.147368	0.042105	0	0.010417	0.229167	0.614583	0.84375	1	0.041667	0.270833	0.552083	0.78125	0.90625	0.125	0.166667	0.354167	0.40625	0.458333	0.34375	0.378947	0.041667	0.1875	0.416667	0.5625	0.927083	0.260417
0.267663	0.419837	0.3125	0.217687	0.170068	0.228571	0.008152	0.210598	0.411685	0.663043	1	0.002717	0.304348	0.581522	0.808424	0.995924	0.001359	0.21875	0.467391	0.710598	0.998641	0.578804	0.157609	0.263587	0.061224	0.066667	0.001361	0.001359	0.304348	0.581522	0.800272	1	0.009511	0.305707	0.485054	0.671196	0.995924	0.036685	0.160326	0.330163	0.633152	0.978261	0.523098	0.353741	0.009511	0.273098	0.576087	0.813859	0.998641	0.422554
0.38756	0.296651	0.315789	0.197115	0.235577	0.201923	0.014354	0.239234	0.449761	0.717703	0.995215	0.009569	0.167464	0.511962	0.77512	1	0.004785	0.311005	0.516746	0.746411	0.980861	0.45933	0.15311	0.38756	0.057692	0.067308	0.019231	0.004785	0.148325	0.521531	0.755981	1	0.210526	0.473684	0.607656	0.942584	0.980861	0.038278	0.30622	0.416268	0.712919	0.913876	0.492823	0.432692	0.019139	0.334928	0.502392	0.727273	0.980861	0.301435
0.37931	0.352087	0.268603	0.285455	0.198182	0.183636	0.00726	0.255898	0.537205	0.749546	0.994555	0.00363	0.232305	0.408348	0.709619	0.998185	0.001815	0.248639	0.53539	0.767695	1	0.540835	0.14882	0.310345	0.061818	0.065455	0.003636	0.001815	0.252269	0.439201	0.747731	1	0.041742	0.23775	0.491833	0.588022	0.807623	0.018149	0.274047	0.640653	0.833031	0.978221	0.459165	0.338182	0.010889	0.283122	0.586207	0.780399	0.983666	0.37931
0.383249	0.398477	0.218274	0.333333	0.16285	0.160305	0.01269	0.274112	0.467005	0.753807	1	0.005076	0.271574	0.527919	0.730964	0.994924	0.002538	0.180203	0.489848	0.769036	0.989848	0.713198	0.137056	0.149746	0.05598	0.050891	0.005089	0.002538	0.225888	0.428934	0.695431	1	0.010152	0.251269	0.64467	0.784264	0.98731	0.058376	0.489848	0.593909	0.819797	0.939086	0.357868	0.300254	0.040609	0.203046	0.451777	0.730964	0.989848	0.439086
0.367704	0.340467	0.291829	0.231969	0.208577	0.208577	0.007782	0.252918	0.501946	0.774319	0.992218	0.005837	0.214008	0.470817	0.710117	0.998054	0.001946	0.270428	0.519455	0.7393	1	0.439689	0.16537	0.394942	0.05653	0.076023	0.005848	0.001946	0.138132	0.375486	0.727626	1	0.040856	0.445525	0.634241	0.787938	0.957198	0.005837	0.299611	0.540856	0.756809	0.990272	0.550584	0.335283	0.005837	0.309339	0.509728	0.752918	0.996109	0.344358
0.352227	0.340081	0.307692	0.272358	0.223577	0.178862	0.020243	0.263158	0.550607	0.805668	0.995951	0.02834	0.251012	0.510121	0.757085	1	0.004049	0.190283	0.421053	0.688259	0.967611	0.437247	0.182186	0.380567	0.056911	0.065041	0.00813	0.004049	0.364372	0.753036	0.874494	1	0.133603	0.190283	0.340081	0.578947	0.834008	0.016194	0.105263	0.404858	0.566802	0.983806	0.425101	0.406504	0.032389	0.226721	0.449393	0.623482	0.967611	0.299595
0.406545	0.306156	0.287299	0.241398	0.241398	0.169811	0.003328	0.239046	0.507488	0.731559	0.999445	0.001109	0.289517	0.50416	0.745979	1	0.000555	0.207432	0.473655	0.770383	0.997227	0.569606	0.160843	0.269551	0.064373	0.056604	0.00444	0.000555	0.287854	0.523572	0.678314	1	0.010538	0.260677	0.445369	0.77482	0.995563	0.006656	0.143649	0.418747	0.833611	0.991681	0.468109	0.358491	0.002773	0.281198	0.494176	0.806988	0.996672	0.324459
0.293403	0.374132	0.332465	0.212858	0.19722	0.259774	0.005208	0.18316	0.479167	0.724826	0.997396	0.001736	0.261285	0.500868	0.74566	0.999132	0.000868	0.27691	0.510417	0.767361	1	0.463542	0.131944	0.404514	0.054735	0.068636	0.000869	0.000868	0.232639	0.488715	0.776042	1	0.127604	0.228299	0.554688	0.802951	0.994792	0.015625	0.280382	0.503472	0.736979	0.985243	0.540799	0.385752	0.007812	0.289931	0.511285	0.749132	0.998264	0.384549
0.333913	0.422609	0.243478	0.25784	0.160279	0.210801	0.003478	0.24	0.45913	0.72	0.998261	0.02087	0.290435	0.516522	0.77913	1	0.001739	0.215652	0.493913	0.713043	0.982609	0.593043	0.102609	0.304348	0.04878	0.04878	0.003484	0.001739	0.351304	0.535652	0.787826	1	0.113043	0.584348	0.65913	0.758261	0.866087	0.008696	0.092174	0.215652	0.615652	0.996522	0.427826	0.379791	0.012174	0.226087	0.594783	0.782609	0.982609	0.426087
0.319635	0.424658	0.255708	0.302752	0.169725	0.192661	0.013699	0.260274	0.515982	0.789954	1	0.009132	0.200913	0.520548	0.73516	0.995434	0.004566	0.296804	0.479452	0.666667	0.894977	0.406393	0.420091	0.173516	0.119266	0.055046	0	0.004566	0.273973	0.611872	0.789954	1	0.027397	0.30137	0.47032	0.598174	0.821918	0.086758	0.123288	0.26484	0.872146	0.986301	0.406393	0.412844	0.031963	0.251142	0.43379	0.648402	0.858447	0.43379
0.350482	0.379421	0.270096	0.267311	0.170692	0.219002	0.009646	0.220257	0.504823	0.78135	0.998392	0.003215	0.263666	0.493569	0.721865	0.977492	0.001608	0.249196	0.490354	0.734727	1	0.530547	0.162379	0.307074	0.062802	0.062802	0.00161	0.001608	0.226688	0.501608	0.721865	1	0.049839	0.28135	0.469453	0.553055	0.871383	0.028939	0.250804	0.564309	0.836013	0.996785	0.437299	0.347826	0.004823	0.245981	0.469453	0.70418	0.993569	0.419614
0.425676	0.310811	0.263514	0.265306	0.190476	0.210884	0.013514	0.202703	0.540541	0.810811	1	0.094595	0.22973	0.47973	0.682432	0.993243	0.006757	0.236486	0.412162	0.689189	0.952703	0.547297	0.22973	0.222973	0.108844	0.040816	0	0.006757	0.175676	0.459459	0.763514	1	0.040541	0.222973	0.425676	0.648649	0.858108	0.297297	0.344595	0.587838	0.912162	0.972973	0.344595	0.367347	0.027027	0.256757	0.439189	0.621622	0.959459	0.304054
0.375	0.305556	0.319444	0.181818	0.286713	0.237762	0.020833	0.222222	0.444444	0.708333	1	0.013889	0.208333	0.513889	0.791667	0.986111	0.006944	0.291667	0.534722	0.729167	0.979167	0.25	0	0.75	0	0.097902	0	0.006944	0.0625	0.326389	0.722222	1	0	0	0	0	0	0.083333	0.291667	0.506944	0.763889	0.979167	0.520833	0.377622	0.090278	0.326389	0.583333	0.756944	0.979167	0.340278
0.348115	0.341463	0.310421	0.206667	0.242222	0.195556	0.008869	0.305987	0.536585	0.747228	0.986696	0.004435	0.179601	0.416851	0.767184	1	0.002217	0.274945	0.498891	0.733925	0.997783	0.43459	0.168514	0.396896	0.053333	0.088889	0.008889	0.002217	0.179601	0.492239	0.780488	1	0.219512	0.414634	0.656319	0.813747	0.922395	0.011086	0.241685	0.452328	0.691796	0.964523	0.545455	0.373333	0.015521	0.288248	0.492239	0.75388	0.984479	0.385809
0.584416	0.255411	0.160173	0.247826	0.165217	0.073913	0.008658	0.290043	0.52381	0.722944	1	0.017316	0.220779	0.688312	0.844156	0.987013	0.004329	0.181818	0.294372	0.372294	0.978355	0.480519	0.004329	0.515152	0.008696	0.078261	0	0.004329	0.116883	0.359307	0.865801	1	0.229437	0.229437	0.229437	0.229437	0.229437	0.17316	0.385281	0.519481	0.658009	0.878788	0.147186	0.156522	0.034632	0.181818	0.268398	0.333333	0.532468	0.272727
0.312925	0.459184	0.227891	0.208191	0.116041	0.201365	0.047619	0.241497	0.452381	0.591837	1	0.006803	0.238095	0.588435	0.772109	0.993197	0.003401	0.302721	0.482993	0.789116	0.996599	0.721088	0.108844	0.170068	0.037543	0.030717	0.003413	0.003401	0.261905	0.578231	0.758503	1	0.064626	0.340136	0.387755	0.428571	0.482993	0.122449	0.159864	0.520408	0.887755	0.952381	0.411565	0.279863	0.010204	0.183673	0.656463	0.836735	0.986395	0.506803
0.305668	0.502024	0.192308	0.273834	0.133874	0.188641	0.006073	0.261134	0.530364	0.730769	1	0.004049	0.248988	0.481781	0.740891	0.993927	0.002024	0.226721	0.51417	0.765182	0.997976	0.732794	0.058704	0.208502	0.032454	0.064909	0.008114	0.002024	0.202429	0.502024	0.757085	1	0.115385	0.483806	0.665992	0.807692	0.995951	0.109312	0.259109	0.319838	0.591093	0.965587	0.508097	0.267748	0.016194	0.291498	0.508097	0.805668	0.997976	0.45749
0.272189	0.573964	0.153846	0.220238	0.113095	0.113095	0.017751	0.183432	0.343195	0.47929	0.934911	0.011834	0.497041	0.656805	0.816568	0.994083	0.005917	0.076923	0.218935	0.35503	1	0.650888	0.218935	0.130178	0.083333	0.02381	0	0.005917	0.431953	0.633136	0.822485	1	0.04142	0.207101	0.295858	0.455621	0.869822	0.112426	0.136095	0.171598	0.360947	0.39645	0.591716	0.321429	0.035503	0.313609	0.662722	0.822485	0.988166	0.579882
0.290123	0.391975	0.317901	0.232198	0.167183	0.26935	0.018519	0.283951	0.496914	0.768519	1	0.006173	0.219136	0.521605	0.697531	0.996914	0.003086	0.246914	0.45679	0.771605	0.993827	0.623457	0.296296	0.080247	0.092879	0.037152	0	0.003086	0.225309	0.549383	0.740741	1	0.111111	0.299383	0.481481	0.756173	0.919753	0.018519	0.033951	0.058642	0.447531	0.966049	0.604938	0.28483	0.012346	0.194444	0.475309	0.712963	0.993827	0.429012
0.347619	0.457143	0.195238	0.296651	0.177033	0.162679	0.014286	0.271429	0.485714	0.709524	1	0.009524	0.190476	0.42381	0.704762	0.985714	0.004762	0.409524	0.671429	0.828571	0.990476	0.542857	0.128571	0.328571	0.057416	0.095694	0.009569	0.004762	0.304762	0.471429	0.619048	1	0.219048	0.671429	0.833333	0.880952	0.995238	0.038095	0.114286	0.271429	0.757143	0.966667	0.342857	0.392344	0.090476	0.404762	0.580952	0.771429	0.990476	0.461905
0.353884	0.31566	0.330456	0.204938	0.264198	0.218519	0.007398	0.254007	0.504316	0.745993	0.998767	0.004932	0.251541	0.488286	0.749692	1	0.001233	0.235512	0.495684	0.750925	0.997534	0.471023	0.236745	0.292232	0.101235	0.054321	0.002469	0.001233	0.210851	0.487053	0.745993	1	0.039457	0.207152	0.420469	0.755857	0.997534	0.006165	0.323058	0.54254	0.706535	0.988903	0.564735	0.414815	0.003699	0.252774	0.475956	0.729963	0.997534	0.325524
0.477273	0.329545	0.193182	0.333333	0.172414	0.091954	0.034091	0.193182	0.420455	0.715909	0.954545	0.022727	0.25	0.556818	0.772727	1	0.011364	0.318182	0.545455	0.647727	0.943182	0.215909	0	0.784091	0	0.068966	0	0.011364	0.045455	0.727273	0.784091	1	0	0	0	0	0	0.090909	0.284091	0.477273	0.670455	0.965909	0.306818	0.413793	0.045455	0.363636	0.534091	0.659091	0.943182	0.352273
0.45045	0.198198	0.351351	0.1	0.309091	0.118182	0.018018	0.171171	0.522523	0.765766	1	0.117117	0.207207	0.333333	0.468468	0.810811	0.009009	0.252252	0.594595	0.792793	0.990991	0.351351	0.171171	0.477477	0.072727	0.054545	0.018182	0.009009	0.171171	0.315315	0.684685	1	0.234234	0.261261	0.378378	0.720721	0.972973	0.081081	0.441441	0.558559	0.837838	0.963964	0.432432	0.381818	0.045045	0.261261	0.477477	0.72973	0.990991	0.198198
0.390244	0.34334	0.266417	0.229323	0.24812	0.171053	0.013133	0.247655	0.478424	0.748593	0.994371	0.003752	0.292683	0.527205	0.742964	1	0.001876	0.212008	0.474672	0.756098	0.998124	0.562852	0.135084	0.302064	0.06015	0.067669	0.007519	0.001876	0.35272	0.555347	0.818011	1	0.015009	0.566604	0.688555	0.786116	0.981238	0.018762	0.140713	0.253283	0.472795	0.938086	0.35272	0.417293	0.009381	0.21576	0.529081	0.793621	0.979362	0.377111
0.396296	0.3	0.303704	0.200743	0.263941	0.200743	0.007407	0.211111	0.466667	0.737037	1	0.011111	0.248148	0.459259	0.733333	0.948148	0.003704	0.318519	0.533333	0.755556	0.996296	0.418519	0.111111	0.47037	0.070632	0.063197	0.003717	0.003704	0.114815	0.585185	0.840741	1	0.040741	0.422222	0.540741	0.696296	0.925926	0.107407	0.248148	0.366667	0.651852	0.992593	0.411111	0.446097	0.014815	0.418519	0.585185	0.77037	0.996296	0.266667
0.351906	0.430108	0.217986	0.273973	0.144814	0.196673	0.00391	0.26784	0.491691	0.769306	0.997067	0.001955	0.244379	0.504399	0.740958	1	0.000978	0.230694	0.486804	0.737048	0.999022	0.69697	0.063539	0.239492	0.029354	0.056751	0.001957	0.000978	0.246334	0.499511	0.721408	1	0.061584	0.384164	0.57869	0.907136	0.979472	0.006843	0.213099	0.435973	0.750733	0.998045	0.312805	0.348337	0.005865	0.220919	0.496579	0.753666	0.99609	0.484848
0.338721	0.334007	0.327273	0.227763	0.229784	0.218329	0.00404	0.244444	0.481481	0.727273	1	0.001347	0.288215	0.546801	0.800673	0.999327	0.000673	0.206734	0.459259	0.724579	0.986532	0.420875	0.108418	0.470707	0.039757	0.09097	0.003369	0.000673	0.356902	0.549495	0.798653	1	0.006061	0.381145	0.522559	0.76431	0.986532	0.010101	0.156229	0.343434	0.678788	0.989899	0.523906	0.373315	0.006734	0.241751	0.485522	0.734007	0.996633	0.33064
0.336449	0.351135	0.312417	0.217914	0.219251	0.223262	0.004005	0.312417	0.542056	0.815754	1	0.008011	0.202937	0.479306	0.70761	0.99733	0.001335	0.222964	0.46996	0.699599	0.998665	0.403204	0.261682	0.335113	0.076203	0.057487	0.009358	0.001335	0.221629	0.516689	0.781041	1	0.006676	0.158879	0.508678	0.783712	0.923899	0.029372	0.296395	0.405874	0.716956	0.99733	0.574099	0.36631	0.012016	0.208278	0.479306	0.676903	0.998665	0.376502
0.435374	0.369615	0.195011	0.322727	0.152273	0.163636	0.015873	0.285714	0.478458	0.705215	1	0.004535	0.24263	0.487528	0.739229	0.997732	0.002268	0.176871	0.53288	0.777778	0.99093	0.698413	0.097506	0.204082	0.056818	0.061364	0.006818	0.002268	0.23356	0.430839	0.693878	1	0.00907	0.21542	0.337868	0.77551	0.922902	0.040816	0.517007	0.623583	0.825397	0.988662	0.340136	0.286364	0.031746	0.181406	0.344671	0.741497	0.99093	0.39229
0.28551	0.392577	0.321913	0.234286	0.175714	0.248571	0.001428	0.290507	0.508922	0.758744	0.996431	0.002855	0.231263	0.473947	0.73733	0.999286	0.000714	0.243398	0.517488	0.750178	1	0.539615	0.373305	0.087081	0.117143	0.027143	0.004286	0.000714	0.24768	0.484654	0.721627	1	0.002141	0.227695	0.492505	0.744468	0.93576	0.033547	0.321199	0.660956	0.958601	0.995004	0.610992	0.29	0.002141	0.255532	0.523911	0.753747	0.998572	0.427552
0.433333	0.327381	0.239286	0.280095	0.1764	0.16329	0.004762	0.205952	0.466667	0.8	1	0.002381	0.27619	0.464286	0.733333	0.99881	0.00119	0.385714	0.557143	0.719048	0.991667	0.560714	0.105952	0.333333	0.039333	0.082241	0.003576	0.00119	0.17619	0.345238	0.732143	1	0.014286	0.470238	0.597619	0.704762	0.795238	0.036905	0.415476	0.582143	0.807143	0.997619	0.392857	0.297974	0.008333	0.40119	0.536905	0.709524	0.964286	0.392857
0.339408	0.379651	0.280942	0.227204	0.193769	0.205927	0.002278	0.307517	0.517844	0.763857	0.999241	0.003797	0.162491	0.39104	0.692483	0.998481	0.000759	0.35915	0.589218	0.798026	1	0.607441	0.069096	0.323462	0.030395	0.068389	0.006079	0.000759	0.15186	0.303721	0.546697	1	0.350038	0.394077	0.45634	0.580866	0.901291	0.319666	0.624146	0.743356	0.88003	0.996203	0.507973	0.37386	0.001519	0.186029	0.529992	0.765376	0.997722	0.408504
0.469945	0.202186	0.327869	0.186813	0.313187	0.131868	0.016393	0.322404	0.595628	0.819672	1	0.010929	0.245902	0.387978	0.650273	0.983607	0.005464	0.163934	0.448087	0.628415	0.989071	0.295082	0.234973	0.469945	0.076923	0.087912	0.010989	0.005464	0.180328	0.393443	0.639344	1	0.021858	0.202186	0.377049	0.546448	0.775956	0.043716	0.327869	0.672131	0.868852	0.989071	0.442623	0.384615	0.021858	0.196721	0.409836	0.628415	0.989071	0.262295
0.357895	0.315789	0.326316	0.276596	0.180851	0.191489	0.031579	0.221053	0.473684	0.747368	1	0.042105	0.136842	0.4	0.642105	0.989474	0.010526	0.326316	0.547368	0.831579	0.968421	0.6	0.031579	0.368421	0.042553	0.085106	0	0.010526	0.221053	0.368421	0.631579	1	0.421053	0.421053	0.421053	0.431579	0.621053	0.136842	0.484211	0.736842	0.831579	0.936842	0.347368	0.382979	0.157895	0.473684	0.631579	0.831579	0.957895	0.336842
0.31094	0.370441	0.318618	0.240385	0.205769	0.242308	0.015355	0.307102	0.556622	0.771593	0.998081	0.007678	0.236084	0.491363	0.775432	1	0.001919	0.21881	0.441459	0.683301	0.996161	0.429942	0.153551	0.416507	0.053846	0.076923	0.015385	0.001919	0.170825	0.476008	0.754319	1	0.038388	0.357006	0.577735	0.715931	0.857965	0.072937	0.25144	0.491363	0.742802	0.975048	0.558541	0.357692	0.003839	0.234165	0.462572	0.68906	0.950096	0.385797
0.337931	0.37931	0.282759	0.238342	0.200345	0.193437	0.005172	0.281034	0.487931	0.762069	0.998276	0.003448	0.193103	0.412069	0.684483	0.994828	0.001724	0.291379	0.581034	0.77931	1	0.501724	0.106897	0.391379	0.034542	0.08981	0.003454	0.001724	0.239655	0.548276	0.806897	1	0.246552	0.57069	0.744828	0.834483	0.943103	0.008621	0.212069	0.394828	0.606897	0.977586	0.45	0.390328	0.008621	0.287931	0.575862	0.774138	0.994828	0.427586
0.368564	0.317073	0.314363	0.222343	0.241866	0.204989	0.001626	0.268293	0.523035	0.736585	0.996206	0.003252	0.267751	0.507859	0.754472	0.999458	0.000542	0.211924	0.461247	0.755556	1	0.511111	0.102981	0.385908	0.045553	0.075922	0.003254	0.000542	0.333333	0.559892	0.762602	1	0.001084	0.124661	0.370732	0.539295	0.980488	0.007588	0.182114	0.463415	0.814092	0.995122	0.523035	0.367679	0.002168	0.239566	0.481843	0.755556	0.998374	0.345257
0.441727	0.305036	0.253237	0.255043	0.197406	0.184438	0.002878	0.283453	0.507914	0.720863	0.998561	0.008633	0.233094	0.494964	0.753957	1	0.001439	0.227338	0.446043	0.795683	0.994245	0.397122	0.047482	0.555396	0.023055	0.083573	0.002882	0.001439	0.146763	0.381295	0.765468	1	0.03741	0.08777	0.241727	0.264748	0.805755	0.010072	0.382734	0.568345	0.72518	0.995683	0.353957	0.377522	0.015827	0.221583	0.42446	0.743885	0.992806	0.320863
0.48125	0.275	0.24375	0.27044	0.238994	0.119497	0.01875	0.2375	0.51875	0.75625	1	0.0125	0.29375	0.54375	0.8	0.9875	0.00625	0.1625	0.4375	0.5625	0.95625	0.31875	0.175	0.50625	0.050314	0.075472	0.012579	0.00625	0.24375	0.4125	0.64375	1	0.025	0.0625	0.29375	0.375	0.575	0.1	0.4375	0.675	0.8	0.95625	0.4125	0.415094	0.025	0.1875	0.3875	0.55625	0.975	0.2375
0.327434	0.376106	0.29646	0.262222	0.213333	0.226667	0.00885	0.225664	0.469027	0.716814	1	0.013274	0.230088	0.495575	0.743363	0.995575	0.004425	0.265487	0.513274	0.747788	0.99115	0.464602	0.216814	0.318584	0.097778	0.08	0	0.004425	0.163717	0.393805	0.716814	1	0.088496	0.256637	0.49115	0.752212	0.973451	0.017699	0.371681	0.539823	0.787611	0.99115	0.460177	0.462222	0.017699	0.269912	0.495575	0.738938	0.973451	0.402655
0.384615	0.318681	0.296703	0.222222	0.222222	0.211111	0.021978	0.230769	0.461538	0.758242	0.967033	0.043956	0.197802	0.384615	0.637363	1	0.010989	0.241758	0.527473	0.835165	0.978022	0.32967	0.351648	0.318681	0.1	0.055556	0.011111	0.010989	0.32967	0.527473	0.692308	1	0.032967	0.10989	0.494505	0.659341	0.967033	0.153846	0.21978	0.296703	0.769231	0.901099	0.461538	0.444444	0.043956	0.197802	0.527473	0.747253	0.978022	0.263736
0.214953	0.649533	0.135514	0.253521	0.089202	0.131455	0.014019	0.135514	0.299065	0.626168	1	0.009346	0.369159	0.565421	0.733645	0.995327	0.004673	0.116822	0.257009	0.747664	0.976636	0.780374	0.163551	0.056075	0.084507	0.018779	0.00939	0.004673	0.378505	0.574766	0.794393	1	0.046729	0.079439	0.168224	0.280374	0.859813	0.009346	0.018692	0.17757	0.308411	0.32243	0.635514	0.319249	0.023364	0.359813	0.584112	0.761682	0.976636	0.668224
0.38121	0.368251	0.25054	0.259459	0.180541	0.175135	0.00324	0.273218	0.548596	0.780778	1	0.00216	0.240821	0.519438	0.766739	0.99892	0.00108	0.242981	0.429806	0.645788	0.967603	0.509719	0.115551	0.37473	0.04973	0.088649	0.006486	0.00108	0.181425	0.555076	0.794816	1	0.008639	0.268898	0.37473	0.518359	0.862851	0.007559	0.285097	0.488121	0.704104	0.984881	0.407127	0.330811	0.006479	0.240821	0.414687	0.595032	0.993521	0.403888
0.36	0.368	0.272	0.261044	0.212851	0.212851	0.012	0.316	0.544	0.744	0.964	0.008	0.244	0.468	0.708	0.996	0.004	0.18	0.46	0.776	1	0.596	0.056	0.348	0.040161	0.11245	0	0.004	0.192	0.476	0.796	1	0.04	0.048	0.292	0.928	0.988	0.068	0.328	0.508	0.668	0.908	0.452	0.393574	0.02	0.236	0.432	0.836	0.992	0.384
0.329412	0.4	0.270588	0.22619	0.22619	0.22619	0.035294	0.294118	0.517647	0.682353	0.988235	0.023529	0.188235	0.435294	0.776471	0.976471	0.011765	0.164706	0.458824	0.670588	1	0.529412	0.258824	0.211765	0.142857	0.047619	0	0.011765	0.2	0.517647	0.788235	1	0.070588	0.552941	0.647059	0.764706	0.941176	0.141176	0.235294	0.294118	0.341176	0.4	0.447059	0.52381	0.058824	0.270588	0.6	0.776471	0.952941	0.329412
0.328213	0.351657	0.320129	0.217638	0.236246	0.219256	0.00485	0.206144	0.481811	0.755861	1	0.001617	0.264349	0.489086	0.731609	0.999192	0.000808	0.279709	0.524656	0.757478	0.997575	0.47211	0.144705	0.383185	0.054207	0.06877	0.005663	0.000808	0.226354	0.489895	0.770412	1	0.004042	0.219887	0.495554	0.691188	0.997575	0.058205	0.291835	0.521423	0.736459	0.991108	0.52304	0.380259	0.004042	0.292643	0.506871	0.746968	0.997575	0.354082
0.410628	0.309179	0.280193	0.223301	0.252427	0.140777	0.009662	0.207729	0.497585	0.753623	0.990338	0.048309	0.285024	0.410628	0.676329	1	0.004831	0.169082	0.599034	0.78744	0.975845	0.541063	0.130435	0.328502	0.067961	0.067961	0	0.004831	0.26087	0.396135	0.647343	1	0.014493	0.067633	0.603865	0.753623	0.937198	0.091787	0.198068	0.570048	0.801932	0.995169	0.512077	0.378641	0.014493	0.31401	0.536232	0.758454	0.995169	0.304348
0.372937	0.323432	0.30363	0.219835	0.213223	0.219835	0.006601	0.29868	0.610561	0.841584	0.988449	0.0033	0.221122	0.442244	0.706271	0.99835	0.00165	0.235974	0.432343	0.660066	1	0.40429	0.128713	0.466997	0.046281	0.105785	0.006612	0.00165	0.280528	0.542904	0.785479	1	0.067657	0.222772	0.382838	0.519802	0.948845	0.00495	0.239274	0.49835	0.737624	0.988449	0.5	0.366942	0.00495	0.19802	0.430693	0.630363	0.9967	0.351485
0.360825	0.371134	0.268041	0.28125	0.166667	0.177083	0.020619	0.247423	0.536082	0.793814	1	0.051546	0.278351	0.515464	0.721649	0.989691	0.010309	0.123711	0.381443	0.659794	0.969072	0.484536	0.175258	0.340206	0.083333	0.104167	0	0.010309	0.195876	0.484536	0.659794	1	0.072165	0.103093	0.14433	0.71134	0.762887	0.206186	0.402062	0.628866	0.876289	0.969072	0.42268	0.375	0.072165	0.247423	0.453608	0.701031	0.938144	0.329897
0.327965	0.366032	0.306003	0.266862	0.217009	0.22434	0.004392	0.222548	0.524158	0.793558	0.992679	0.002928	0.232796	0.481698	0.708638	1	0.001464	0.292826	0.49634	0.743777	0.998536	0.387994	0.17716	0.434846	0.079179	0.073314	0.005865	0.001464	0.257687	0.483163	0.82284	1	0.010249	0.18448	0.395315	0.866764	0.998536	0.033675	0.27672	0.531479	0.679356	0.926794	0.537335	0.378299	0.011713	0.25183	0.464129	0.693997	0.998536	0.382138
0.379913	0.326055	0.294032	0.252187	0.218659	0.173469	0.002911	0.190684	0.481805	0.787482	1	0.007278	0.279476	0.525473	0.764192	0.995633	0.001456	0.272198	0.464338	0.695779	0.997089	0.515284	0.141194	0.343523	0.048105	0.077259	0.004373	0.001456	0.171761	0.481805	0.783115	1	0.004367	0.363901	0.554585	0.655022	0.803493	0.018923	0.295488	0.471616	0.739447	0.992722	0.455604	0.3207	0.004367	0.294032	0.464338	0.6754	0.997089	0.344978
0.323353	0.402695	0.273952	0.22039	0.176912	0.235382	0.004491	0.278443	0.476048	0.760479	1	0.010479	0.229042	0.552395	0.751497	0.998503	0.001497	0.238024	0.477545	0.717066	0.994012	0.571856	0.151198	0.276946	0.056972	0.05997	0	0.001497	0.212575	0.525449	0.738024	1	0.068862	0.200599	0.33982	0.447605	0.601796	0.086826	0.363772	0.609281	0.911677	0.992515	0.519461	0.311844	0.005988	0.308383	0.618263	0.763473	0.994012	0.404192
0.396914	0.237027	0.366059	0.179775	0.327247	0.174157	0.008415	0.26648	0.527349	0.771388	1	0.00561	0.246844	0.486676	0.704067	0.997195	0.001403	0.232819	0.472651	0.740533	0.998597	0.460028	0.225806	0.314165	0.095506	0.064607	0.002809	0.001403	0.210379	0.436185	0.750351	1	0.044881	0.151473	0.420757	0.837307	0.976157	0.007013	0.342216	0.565217	0.726508	0.997195	0.59467	0.41573	0.004208	0.255259	0.486676	0.741935	0.997195	0.237027
0.431818	0.272727	0.295455	0.172414	0.252874	0.195402	0.045455	0.215909	0.511364	0.715909	1	0.034091	0.25	0.465909	0.761364	0.897727	0.011364	0.159091	0.454545	0.738636	0.977273	0.261364	0	0.738636	0	0.091954	0	0.011364	0.170455	0.238636	0.545455	1	0	0	0	0	0	0.045455	0.329545	0.568182	0.75	0.954545	0.386364	0.413793	0.079545	0.306818	0.477273	0.704545	0.954545	0.25
0.364469	0.302198	0.333333	0.218349	0.269725	0.19633	0.005495	0.25641	0.489011	0.760073	0.996337	0.007326	0.203297	0.446886	0.736264	0.998168	0.001832	0.287546	0.529304	0.747253	1	0.342491	0.087912	0.569597	0.034862	0.104587	0.005505	0.001832	0.254579	0.470696	0.727106	1	0.043956	0.197802	0.239927	0.267399	0.377289	0.003663	0.362637	0.564103	0.800366	0.994505	0.569597	0.418349	0.003663	0.260073	0.483516	0.738095	0.998168	0.309524
0.345997	0.324288	0.329715	0.230978	0.244565	0.221467	0.006784	0.230665	0.472185	0.721845	0.998643	0.002714	0.279512	0.529172	0.759837	1	0.001357	0.240163	0.49118	0.750339	0.997286	0.423338	0.162822	0.41384	0.065217	0.081522	0.002717	0.001357	0.240163	0.483039	0.735414	1	0.004071	0.189959	0.438263	0.616011	0.87517	0.017639	0.255088	0.56445	0.793758	0.967436	0.556309	0.388587	0.004071	0.283582	0.515604	0.729986	0.987788	0.34057
0.339726	0.386301	0.273973	0.228022	0.211538	0.236264	0.005479	0.20274	0.520548	0.769863	0.994521	0.013699	0.254795	0.457534	0.70137	1	0.00274	0.265753	0.528767	0.747945	0.969863	0.69589	0.057534	0.246575	0.098901	0.098901	0.005495	0.00274	0.230137	0.468493	0.720548	1	0.019178	0.257534	0.40274	0.526027	0.857534	0.084932	0.339726	0.646575	0.8	0.994521	0.30137	0.505495	0.013699	0.271233	0.512329	0.734247	0.989041	0.383562
0.325967	0.314917	0.359116	0.183333	0.25	0.216667	0.016575	0.171271	0.364641	0.718232	0.977901	0.033149	0.342541	0.59116	0.723757	0.98895	0.005525	0.270718	0.458564	0.740331	1	0.486188	0.292818	0.220994	0.111111	0.055556	0	0.005525	0.237569	0.497238	0.696133	1	0.265193	0.342541	0.635359	0.823204	0.994475	0.099448	0.149171	0.226519	0.552486	0.872928	0.530387	0.411111	0.027624	0.375691	0.563536	0.78453	0.994475	0.337017
0.345588	0.294118	0.360294	0.214815	0.251852	0.22963	0.022059	0.220588	0.455882	0.647059	1	0.014706	0.25	0.522059	0.801471	0.933824	0.007353	0.227941	0.463235	0.757353	0.992647	0.389706	0.330882	0.279412	0.17037	0.051852	0.007407	0.007353	0.338235	0.536765	0.713235	1	0.169118	0.411765	0.588235	0.808824	0.985294	0.036765	0.095588	0.235294	0.301471	0.904412	0.477941	0.459259	0.029412	0.257353	0.602941	0.786765	0.992647	0.294118
0.396694	0.272727	0.330579	0.15	0.258333	0.216667	0.041322	0.256198	0.471074	0.694215	1	0.016529	0.347107	0.495868	0.801653	0.975207	0.008264	0.181818	0.429752	0.710744	0.983471	0.38843	0.272727	0.338843	0.1	0.083333	0.016667	0.008264	0.289256	0.471074	0.818182	1	0.033058	0.297521	0.421488	0.53719	0.975207	0.132231	0.206612	0.578512	0.68595	0.892562	0.446281	0.416667	0.033058	0.214876	0.487603	0.669421	0.966942	0.297521
0.318267	0.374765	0.306968	0.19434	0.19434	0.215094	0.024482	0.231638	0.442561	0.696798	0.992467	0.003766	0.20339	0.512241	0.764595	1	0.001883	0.293785	0.544256	0.777778	0.996234	0.517891	0.171375	0.310734	0.05283	0.090566	0.003774	0.001883	0.146893	0.423729	0.696798	1	0.099812	0.274953	0.704331	0.86064	0.932203	0.050847	0.39548	0.521657	0.734463	0.996234	0.514124	0.384906	0.00565	0.278719	0.517891	0.79096	0.996234	0.397363
0.297189	0.369478	0.333333	0.229839	0.21371	0.258065	0.012048	0.26506	0.574297	0.815261	0.995984	0.008032	0.200803	0.425703	0.690763	1	0.004016	0.248996	0.506024	0.710843	0.951807	0.457831	0.321285	0.220884	0.108871	0.068548	0.004032	0.004016	0.220884	0.457831	0.682731	1	0.024096	0.180723	0.321285	0.526104	0.783133	0.405622	0.662651	0.835341	0.899598	0.955823	0.550201	0.330645	0.028112	0.269076	0.502008	0.706827	0.951807	0.365462
0.320805	0.377181	0.302013	0.232527	0.204301	0.216398	0.010738	0.230872	0.491275	0.711409	1	0.002685	0.328859	0.614765	0.809396	0.990604	0.001342	0.220134	0.395973	0.61745	0.997315	0.586577	0.126174	0.287248	0.051075	0.051075	0.002688	0.001342	0.314094	0.66443	0.830872	1	0.128859	0.22953	0.589262	0.755705	0.997315	0.044295	0.174497	0.33557	0.491275	0.672483	0.500671	0.352151	0.004027	0.244295	0.424161	0.632215	0.997315	0.397315
0.284884	0.337209	0.377907	0.19883	0.210526	0.274854	0.046512	0.302326	0.546512	0.802326	0.965116	0.017442	0.226744	0.418605	0.662791	1	0.005814	0.255814	0.488372	0.738372	0.994186	0.406977	0.494186	0.098837	0.152047	0.023392	0	0.005814	0.319767	0.656977	0.773256	1	0.011628	0.30814	0.505814	0.744186	0.94186	0.087209	0.127907	0.151163	0.174419	0.203488	0.569767	0.397661	0.011628	0.27907	0.534884	0.744186	0.994186	0.354651
0.401763	0.241814	0.356423	0.181589	0.346784	0.184111	0.006297	0.253149	0.491184	0.739295	1	0.005038	0.251889	0.532746	0.74937	0.987406	0.001259	0.234257	0.479849	0.745592	0.998741	0.481108	0.234257	0.284635	0.094578	0.054224	0.001261	0.001259	0.209068	0.447103	0.738035	1	0.040302	0.211587	0.420655	0.798489	0.997481	0.006297	0.358942	0.575567	0.707809	0.992443	0.571788	0.401009	0.003778	0.245592	0.474811	0.739295	0.998741	0.260705
0.456522	0.326087	0.217391	0.296703	0.263736	0.142857	0.021739	0.25	0.456522	0.717391	1	0.043478	0.217391	0.543478	0.706522	0.934783	0.01087	0.152174	0.391304	0.771739	0.978261	0.532609	0.326087	0.141304	0.175824	0.043956	0	0.01087	0.326087	0.597826	0.793478	1	0.021739	0.097826	0.228261	0.75	0.98913	0.380435	0.402174	0.434783	0.467391	0.576087	0.206522	0.373626	0.108696	0.184783	0.456522	0.75	0.956522	0.347826
0.373333	0.36	0.266667	0.263393	0.214286	0.174107	0.008889	0.253333	0.475556	0.715556	1	0.022222	0.315556	0.551111	0.746667	0.991111	0.004444	0.182222	0.4	0.755556	0.977778	0.555556	0.2	0.244444	0.089286	0.053571	0	0.004444	0.306667	0.511111	0.666667	1	0.035556	0.231111	0.364444	0.808889	0.986667	0.088889	0.142222	0.408889	0.755556	0.92	0.408889	0.375	0.035556	0.226667	0.404444	0.742222	0.986667	0.355556
0.352717	0.341277	0.306006	0.212786	0.228053	0.22042	0.00572	0.285033	0.508103	0.769304	0.999047	0.001907	0.22307	0.485224	0.730219	0.996187	0.000953	0.242135	0.490944	0.716873	1	0.319352	0.102955	0.577693	0.039122	0.08874	0.002863	0.000953	0.335558	0.522402	0.754051	1	0.225929	0.442326	0.645377	0.703527	0.931363	0.00858	0.182078	0.382269	0.748332	0.999047	0.502383	0.391221	0.009533	0.239276	0.510963	0.743565	0.99428	0.375596
0.347032	0.360731	0.292237	0.256293	0.221968	0.183066	0.006849	0.271689	0.547945	0.773973	1	0.004566	0.212329	0.488584	0.730594	0.986301	0.002283	0.244292	0.479452	0.762557	0.995434	0.360731	0.136986	0.502283	0.077803	0.10984	0.004577	0.002283	0.212329	0.518265	0.785388	1	0.06621	0.299087	0.52968	0.920091	0.995434	0.020548	0.269406	0.481735	0.710046	0.947489	0.579909	0.389016	0.011416	0.244292	0.472603	0.700913	0.995434	0.401826
0.302817	0.341549	0.355634	0.201413	0.215548	0.275618	0.017606	0.285211	0.507042	0.778169	0.996479	0.007042	0.228873	0.475352	0.711268	1	0.003521	0.232394	0.485915	0.725352	0.992958	0.415493	0.151408	0.433099	0.042403	0.091873	0	0.003521	0.179577	0.419014	0.690141	1	0.193662	0.285211	0.605634	0.644366	0.728873	0.045775	0.253521	0.528169	0.830986	0.992958	0.556338	0.424028	0.010563	0.235915	0.475352	0.679577	0.985915	0.352113
0.455263	0.357895	0.186842	0.248021	0.131926	0.163588	0.026316	0.292105	0.536842	0.668421	0.994737	0.013158	0.223684	0.434211	0.739474	0.997368	0.002632	0.181579	0.647368	0.828947	1	0.634211	0.094737	0.271053	0.042216	0.068602	0.005277	0.002632	0.278947	0.471053	0.678947	1	0.007895	0.697368	0.784211	0.855263	0.965789	0.026316	0.089474	0.378947	0.728947	0.986842	0.278947	0.28496	0.010526	0.289474	0.689474	0.810526	0.992105	0.439474
0.406433	0.368421	0.225146	0.31085	0.14956	0.187683	0.011696	0.25731	0.549708	0.774854	1	0.005848	0.216374	0.461988	0.736842	0.997076	0.002924	0.263158	0.491228	0.701754	0.97076	0.584795	0.154971	0.260234	0.064516	0.070381	0	0.002924	0.192982	0.385965	0.74269	1	0.105263	0.184211	0.5	0.614035	0.979532	0.049708	0.476608	0.681287	0.868421	0.935673	0.418129	0.357771	0.023392	0.25731	0.5	0.74269	0.98538	0.397661
0.358951	0.390597	0.250452	0.236199	0.175566	0.230769	0.002712	0.246835	0.462929	0.744123	1	0.001808	0.174503	0.487342	0.737794	0.997288	0.000904	0.371609	0.566908	0.761302	0.998192	0.762206	0.090416	0.147378	0.049774	0.037104	0.000905	0.000904	0.243219	0.483725	0.697107	1	0.022604	0.367089	0.504521	0.820976	0.96745	0.001808	0.216998	0.839964	0.906872	0.983725	0.356239	0.428959	0.003617	0.138336	0.474684	0.771248	0.995479	0.468354
0.364407	0.338983	0.29661	0.238298	0.255319	0.221277	0.012712	0.237288	0.466102	0.711864	0.995763	0.008475	0.241525	0.516949	0.745763	0.978814	0.004237	0.254237	0.521186	0.775424	1	0.355932	0.237288	0.40678	0.085106	0.051064	0	0.004237	0.25	0.54661	0.851695	1	0.042373	0.275424	0.5	0.737288	0.966102	0.118644	0.216102	0.461864	0.648305	0.877119	0.533898	0.451064	0.021186	0.245763	0.512712	0.745763	0.970339	0.29661
0.413793	0.37931	0.206897	0.288184	0.149856	0.18732	0.011494	0.29023	0.482759	0.772989	0.971264	0.005747	0.238506	0.5	0.744253	1	0.002874	0.215517	0.436782	0.718391	0.994253	0.482759	0.20977	0.307471	0.074928	0.086455	0	0.002874	0.158046	0.408046	0.695402	1	0.126437	0.270115	0.594828	0.718391	0.994253	0.008621	0.310345	0.531609	0.795977	0.95977	0.399425	0.334294	0.020115	0.270115	0.531609	0.75	0.994253	0.41954
0.467005	0.294416	0.238579	0.244275	0.193384	0.157761	0.007614	0.203046	0.406091	0.695431	0.992386	0.020305	0.256345	0.525381	0.779188	0.984772	0.002538	0.393401	0.604061	0.77665	1	0.5	0.203046	0.296954	0.061069	0.066158	0.005089	0.002538	0.182741	0.43401	0.72335	1	0.007614	0.634518	0.738579	0.878173	0.964467	0.111675	0.27665	0.370558	0.527919	0.984772	0.393401	0.26972	0.010152	0.48731	0.659898	0.819797	0.977157	0.347716
0.435685	0.360996	0.20332	0.333333	0.229167	0.158333	0.012448	0.278008	0.502075	0.738589	1	0.008299	0.224066	0.460581	0.717842	0.995851	0.004149	0.232365	0.489627	0.780083	0.991701	0.585062	0.120332	0.294606	0.075	0.091667	0	0.004149	0.319502	0.560166	0.717842	1	0.058091	0.33195	0.763485	0.846473	0.991701	0.020747	0.161826	0.26556	0.692946	0.929461	0.340249	0.466667	0.062241	0.273859	0.59751	0.792531	0.991701	0.410788
0.354545	0.336364	0.309091	0.275229	0.220183	0.211009	0.018182	0.190909	0.436364	0.709091	0.990909	0.027273	0.290909	0.545455	0.781818	1	0.009091	0.2	0.472727	0.654545	0.972727	0.527273	0.227273	0.245455	0.091743	0.073394	0	0.009091	0.127273	0.445455	0.8	1	0.372727	0.590909	0.645455	0.763636	0.890909	0.145455	0.2	0.318182	0.5	0.563636	0.372727	0.422018	0.054545	0.254545	0.5	0.654545	0.972727	0.336364
0.375	0.306818	0.318182	0.252874	0.229885	0.16092	0.034091	0.238636	0.477273	0.647727	0.988636	0.022727	0.193182	0.534091	0.727273	0.965909	0.011364	0.284091	0.465909	0.761364	1	0.454545	0.511364	0.034091	0.114943	0.022989	0.022989	0.011364	0.215909	0.556818	0.670455	1	0.102273	0.284091	0.477273	0.738636	0.988636	0.045455	0.045455	0.045455	0.943182	0.954545	0.363636	0.45977	0.125	0.272727	0.465909	0.761364	0.965909	0.284091
0.324176	0.516484	0.159341	0.297521	0.101928	0.121212	0.008242	0.362637	0.60989	0.791209	1	0.005495	0.17033	0.46978	0.752747	0.991758	0.002747	0.252747	0.379121	0.612637	0.997253	0.835165	0.131868	0.032967	0.046832	0.019284	0.008264	0.002747	0.285714	0.574176	0.785714	1	0.065934	0.25	0.296703	0.376374	0.994505	0.008242	0.013736	0.021978	0.343407	0.71978	0.318681	0.292011	0.010989	0.137363	0.35989	0.642857	0.994505	0.53022
0.321244	0.378238	0.300518	0.239583	0.255208	0.229167	0.015544	0.238342	0.476684	0.725389	1	0.010363	0.207254	0.497409	0.740933	0.979275	0.005181	0.279793	0.528497	0.73057	0.989637	0.419689	0.466321	0.11399	0.140625	0.026042	0.005208	0.005181	0.300518	0.590674	0.834197	1	0.015544	0.326425	0.523316	0.694301	0.979275	0.07772	0.098446	0.238342	0.264249	0.725389	0.46114	0.489583	0.015544	0.264249	0.476684	0.704663	0.974093	0.419689
0.348361	0.336066	0.315574	0.246914	0.213992	0.205761	0.016393	0.258197	0.487705	0.709016	0.979508	0.008197	0.180328	0.483607	0.741803	0.995902	0.004098	0.266393	0.5	0.745902	1	0.479508	0.381148	0.139344	0.139918	0.041152	0	0.004098	0.155738	0.536885	0.75	1	0.110656	0.446721	0.594262	0.819672	0.995902	0.028689	0.159836	0.20082	0.241803	0.479508	0.520492	0.386831	0.020492	0.270492	0.52459	0.766393	0.991803	0.352459
0.3	0.429412	0.270588	0.260355	0.16568	0.224852	0.088235	0.323529	0.488235	0.735294	0.994118	0.011765	0.217647	0.511765	0.752941	0.982353	0.005882	0.176471	0.464706	0.723529	1	0.405882	0.235294	0.358824	0.076923	0.076923	0.005917	0.005882	0.188235	0.423529	0.694118	1	0.058824	0.176471	0.470588	0.570588	0.858824	0.1	0.352941	0.652941	0.782353	0.970588	0.535294	0.284024	0.023529	0.164706	0.470588	0.729412	0.988235	0.417647
0.398329	0.275766	0.325905	0.230126	0.249651	0.171548	0.002786	0.238162	0.498607	0.736769	0.995822	0.005571	0.246518	0.491643	0.745125	0.998607	0.001393	0.264624	0.511142	0.764624	1	0.451253	0.083565	0.465181	0.034868	0.079498	0.001395	0.001393	0.17688	0.423398	0.678273	1	0.006964	0.383008	0.604457	0.859331	0.915042	0.016713	0.303621	0.58078	0.763231	0.995822	0.456825	0.387727	0.005571	0.331476	0.529248	0.75766	0.993036	0.295265
0.293217	0.382932	0.323851	0.223684	0.221491	0.258772	0.017505	0.28884	0.544858	0.761488	1	0.004376	0.229759	0.47046	0.750547	0.984683	0.002188	0.234136	0.501094	0.719912	0.997812	0.380744	0.185996	0.43326	0.070175	0.100877	0.004386	0.002188	0.236324	0.527352	0.741794	1	0.094092	0.326039	0.483589	0.719912	0.995624	0.008753	0.205689	0.496718	0.761488	0.967177	0.573304	0.390351	0.008753	0.234136	0.477024	0.719912	0.991247	0.437637
0.357942	0.328859	0.313199	0.226457	0.235426	0.215247	0.004474	0.234899	0.47651	0.758389	0.997763	0.008949	0.279642	0.52349	0.744966	1	0.002237	0.210291	0.480984	0.749441	0.991051	0.389262	0.120805	0.489933	0.053812	0.089686	0.004484	0.002237	0.395973	0.581655	0.780761	1	0.404922	0.57047	0.686801	0.847875	0.995526	0.011186	0.147651	0.322148	0.606264	0.98434	0.590604	0.331839	0.013423	0.232662	0.503356	0.711409	0.991051	0.357942
0.331839	0.452915	0.215247	0.333333	0.13964	0.171171	0.026906	0.29148	0.475336	0.695067	1	0.013453	0.255605	0.560538	0.744395	0.995516	0.004484	0.174888	0.331839	0.7713	0.991031	0.479821	0.278027	0.242152	0.09009	0.081081	0.009009	0.004484	0.304933	0.524664	0.690583	1	0.008969	0.09417	0.206278	0.331839	0.820628	0.484305	0.672646	0.798206	0.892377	0.991031	0.367713	0.423423	0.008969	0.219731	0.430493	0.807175	0.991031	0.488789
0.385629	0.337725	0.276647	0.272182	0.201439	0.183453	0.003593	0.235928	0.51497	0.776048	1	0.002395	0.273054	0.535329	0.760479	0.998802	0.001198	0.233533	0.432335	0.674251	0.972455	0.486228	0.203593	0.31018	0.07554	0.063549	0.003597	0.001198	0.247904	0.523353	0.832335	1	0.086228	0.202395	0.427545	0.790419	0.877844	0.010778	0.300599	0.51497	0.693413	0.958084	0.474251	0.338129	0.005988	0.25988	0.456287	0.673054	0.966467	0.354491
0.364692	0.29036	0.344948	0.206977	0.265116	0.206977	0.003484	0.229965	0.516841	0.761905	0.998839	0.009292	0.2741	0.505226	0.747967	0.996516	0.001161	0.24158	0.490128	0.739837	1	0.377468	0.038328	0.584204	0.019767	0.084884	0.005814	0.001161	0.28223	0.458769	0.684088	1	0.278746	0.384437	0.653891	0.832753	0.911731	0.036005	0.210221	0.511034	0.772358	0.996516	0.545877	0.355814	0.026713	0.296167	0.508711	0.757259	0.996516	0.305459
0.351852	0.277778	0.37037	0.197026	0.256506	0.197026	0.011111	0.2	0.462963	0.677778	0.996296	0.007407	0.277778	0.618519	0.833333	0.988889	0.003704	0.240741	0.42963	0.711111	1	0.377778	0.148148	0.474074	0.052045	0.074349	0.01487	0.003704	0.240741	0.577778	0.759259	1	0.251852	0.533333	0.707407	0.774074	0.914815	0.051852	0.207407	0.362963	0.618519	0.988889	0.518519	0.386617	0.037037	0.277778	0.459259	0.748148	0.992593	0.296296
0.391129	0.403226	0.205645	0.275304	0.190283	0.161943	0.012097	0.306452	0.540323	0.790323	1	0.008065	0.165323	0.5	0.717742	0.959677	0.004032	0.262097	0.423387	0.725806	0.979839	0.762097	0.104839	0.133065	0.040486	0.040486	0	0.004032	0.217742	0.560484	0.75	1	0.048387	0.185484	0.294355	0.350806	0.459677	0.221774	0.25	0.391129	0.895161	0.991935	0.407258	0.380567	0.016129	0.193548	0.395161	0.649194	0.979839	0.483871
0.422907	0.273128	0.303965	0.247788	0.252212	0.176991	0.039648	0.281938	0.550661	0.837004	1	0.035242	0.264317	0.497797	0.665198	0.929515	0.004405	0.15859	0.405286	0.660793	0.982379	0.370044	0.246696	0.38326	0.088496	0.079646	0	0.004405	0.237885	0.488987	0.85022	1	0.008811	0.123348	0.436123	0.612335	0.955947	0.101322	0.334802	0.585903	0.779736	0.903084	0.480176	0.460177	0.008811	0.246696	0.471366	0.665198	0.982379	0.299559
0.375427	0.38339	0.241183	0.225513	0.173121	0.166287	0.002275	0.292378	0.522184	0.74744	0.998862	0.015927	0.17975	0.409556	0.638225	0.997725	0.001138	0.301479	0.654152	0.821388	1	0.593857	0.035267	0.370876	0.019362	0.092255	0.007973	0.001138	0.220705	0.390216	0.546075	1	0.040956	0.094425	0.12628	0.229807	0.346985	0.012514	0.634812	0.761092	0.87372	0.992036	0.54835	0.394077	0.003413	0.226394	0.511945	0.757679	0.990899	0.362912
0.437427	0.290058	0.272515	0.203747	0.237705	0.168618	0.003509	0.197661	0.490058	0.792982	1	0.004678	0.28538	0.511111	0.727485	0.997661	0.00117	0.28655	0.493567	0.701754	0.988304	0.490058	0.139181	0.37076	0.052693	0.07377	0.005855	0.00117	0.180117	0.397661	0.697076	1	0.003509	0.239766	0.449123	0.592982	0.739181	0.016374	0.375439	0.633918	0.847953	0.989474	0.425731	0.332553	0.005848	0.326316	0.504094	0.698246	0.988304	0.327485
0.359801	0.26799	0.372208	0.190062	0.277019	0.224845	0.006203	0.248139	0.522333	0.751861	0.998759	0.004963	0.258065	0.486352	0.734491	0.980149	0.001241	0.241935	0.495037	0.754342	1	0.48139	0.222084	0.296526	0.095652	0.055901	0.003727	0.001241	0.210918	0.451613	0.736973	1	0.040943	0.183623	0.426799	0.800248	0.997519	0.006203	0.332506	0.554591	0.7134	0.991315	0.57072	0.404969	0.003722	0.244417	0.478908	0.743176	0.997519	0.290323
0.353535	0.252525	0.393939	0.163265	0.295918	0.163265	0.040404	0.252525	0.535354	0.767677	1	0.020202	0.191919	0.454545	0.717172	0.919192	0.010101	0.232323	0.474747	0.626263	0.979798	0.414141	0.30303	0.282828	0.122449	0.061224	0	0.010101	0.262626	0.636364	0.787879	1	0.282828	0.535354	0.616162	0.818182	0.949495	0.040404	0.10101	0.232323	0.434343	0.505051	0.373737	0.428571	0.060606	0.191919	0.454545	0.606061	0.949495	0.222222
0.47619	0.238095	0.285714	0.240385	0.269231	0.163462	0.038095	0.171429	0.352381	0.666667	1	0.133333	0.361905	0.638095	0.790476	0.961905	0.009524	0.333333	0.52381	0.761905	0.980952	0.533333	0.133333	0.333333	0.067308	0.105769	0.009615	0.009524	0.161905	0.333333	0.647619	1	0.180952	0.2	0.409524	0.495238	0.685714	0.066667	0.571429	0.790476	0.87619	0.971429	0.333333	0.365385	0.028571	0.495238	0.657143	0.857143	0.980952	0.27619
0.389423	0.269231	0.341346	0.175904	0.296386	0.192771	0.009615	0.206731	0.502404	0.778846	0.997596	0.004808	0.293269	0.46875	0.728365	1	0.002404	0.242788	0.509615	0.730769	0.995192	0.408654	0.204327	0.387019	0.06988	0.079518	0.007229	0.002404	0.286058	0.53125	0.783654	1	0.086538	0.25	0.483173	0.764423	0.951923	0.007212	0.194712	0.439904	0.692308	0.978365	0.543269	0.4	0.007212	0.264423	0.478365	0.704327	0.995192	0.288462
0.464072	0.302395	0.233533	0.267267	0.225225	0.147147	0.01497	0.230539	0.508982	0.772455	0.994012	0.005988	0.242515	0.461078	0.679641	0.961078	0.002994	0.275449	0.535928	0.733533	1	0.443114	0.062874	0.494012	0.03003	0.09009	0	0.002994	0.200599	0.398204	0.661677	1	0.131737	0.143713	0.377246	0.458084	0.54491	0.008982	0.335329	0.628743	0.766467	0.997006	0.299401	0.318318	0.011976	0.371257	0.538922	0.679641	0.997006	0.314371
0.376344	0.268817	0.354839	0.228261	0.282609	0.206522	0.021505	0.236559	0.526882	0.741935	1	0.043011	0.215054	0.397849	0.602151	0.924731	0.010753	0.225806	0.494624	0.784946	0.978495	0.333333	0.290323	0.376344	0.108696	0.065217	0.021739	0.010753	0.354839	0.494624	0.698925	1	0.043011	0.096774	0.397849	0.634409	0.956989	0.150538	0.225806	0.322581	0.795699	0.924731	0.505376	0.434783	0.043011	0.215054	0.505376	0.741935	0.956989	0.290323
0.274648	0.426056	0.299296	0.241623	0.164021	0.268078	0.010563	0.25	0.540493	0.785211	0.996479	0.003521	0.227113	0.43838	0.693662	1	0.001761	0.265845	0.554577	0.767606	0.984155	0.651408	0.109155	0.239437	0.05291	0.059965	0.003527	0.001761	0.205986	0.415493	0.679577	1	0.179577	0.602113	0.72007	0.816901	0.984155	0.010563	0.278169	0.579225	0.859155	0.975352	0.514085	0.388007	0.005282	0.271127	0.498239	0.762324	0.984155	0.478873
0.369748	0.302521	0.327731	0.211864	0.254237	0.177966	0.033613	0.252101	0.529412	0.689076	1	0.016807	0.201681	0.403361	0.705882	0.966387	0.008403	0.277311	0.554622	0.789916	0.983193	0.352941	0.151261	0.495798	0.042373	0.076271	0.008475	0.008403	0.084034	0.285714	0.420168	1	0.310924	0.336134	0.453782	0.756303	0.798319	0.109244	0.487395	0.613445	0.848739	0.983193	0.462185	0.355932	0.058824	0.361345	0.579832	0.764706	0.983193	0.294118
0.396739	0.298913	0.304348	0.262295	0.234973	0.218579	0.016304	0.222826	0.483696	0.782609	1	0.01087	0.244565	0.51087	0.793478	0.983696	0.005435	0.23913	0.478261	0.673913	0.923913	0.440217	0.375	0.184783	0.153005	0.021858	0	0.005435	0.211957	0.592391	0.853261	1	0.048913	0.190217	0.478261	0.663043	0.940217	0.326087	0.36413	0.413043	0.766304	0.815217	0.434783	0.502732	0.021739	0.347826	0.48913	0.673913	0.923913	0.293478
0.413665	0.335404	0.250932	0.247512	0.18408	0.177861	0.004969	0.204969	0.490683	0.715528	1	0.002484	0.264596	0.493168	0.762733	0.996273	0.001242	0.309317	0.546584	0.744099	0.997516	0.565217	0.122981	0.311801	0.044776	0.069652	0.004975	0.001242	0.160248	0.356522	0.715528	1	0.032298	0.424845	0.614907	0.745342	0.991304	0.045963	0.382609	0.583851	0.802484	0.980124	0.419876	0.318408	0.040994	0.326708	0.50559	0.744099	0.997516	0.385093
0.376605	0.356633	0.266762	0.27	0.215714	0.174286	0.005706	0.268188	0.520685	0.761769	0.99572	0.002853	0.201141	0.445078	0.740371	1	0.001427	0.339515	0.536377	0.743224	0.998573	0.620542	0.135521	0.243937	0.065714	0.057143	0.005714	0.001427	0.225392	0.472183	0.733238	1	0.039943	0.373752	0.579173	0.825963	0.951498	0.054208	0.360913	0.529244	0.774608	0.998573	0.422254	0.402857	0.007133	0.266762	0.479315	0.699001	0.994294	0.39515
0.404153	0.311502	0.284345	0.2256	0.2272	0.1904	0.003195	0.289137	0.485623	0.746006	1	0.004792	0.242812	0.541534	0.784345	0.998403	0.001597	0.194888	0.460064	0.677316	0.996805	0.560703	0.051118	0.388179	0.0384	0.0864	0.0064	0.001597	0.400958	0.565495	0.813099	1	0.100639	0.522364	0.714058	0.771565	0.950479	0.007987	0.134185	0.329073	0.635783	0.996805	0.365815	0.3936	0.01278	0.185304	0.482428	0.709265	0.996805	0.321086
0.350365	0.321168	0.328467	0.169118	0.220588	0.242647	0.080292	0.328467	0.532847	0.773723	1	0.014599	0.189781	0.372263	0.729927	0.970803	0.007299	0.240876	0.481752	0.737226	0.978102	0.328467	0.153285	0.518248	0.051471	0.080882	0.007353	0.007299	0.189781	0.343066	0.773723	1	0.218978	0.262774	0.29927	0.386861	0.708029	0.080292	0.474453	0.605839	0.810219	0.978102	0.467153	0.426471	0.051095	0.284672	0.481752	0.729927	0.978102	0.291971
0.309108	0.366145	0.324747	0.229282	0.221915	0.223757	0.00184	0.26219	0.515179	0.765409	0.99724	0.00368	0.25115	0.484821	0.74057	0.99908	0.00092	0.23827	0.5023	0.74609	1	0.414903	0.130635	0.454462	0.046961	0.069061	0.000921	0.00092	0.282429	0.49126	0.74425	1	0.048758	0.135235	0.477461	0.73781	0.955842	0.00736	0.228151	0.536339	0.766329	0.980681	0.5023	0.441989	0.00276	0.25115	0.49954	0.74977	0.99632	0.402944
0.379971	0.33137	0.28866	0.255162	0.225664	0.171091	0.007364	0.21944	0.493373	0.75405	0.998527	0.004418	0.151694	0.427099	0.720177	1	0.001473	0.381443	0.578792	0.759941	0.995582	0.544919	0.142857	0.312224	0.048673	0.066372	0.007375	0.001473	0.148748	0.291605	0.628866	1	0.0162	0.509573	0.677467	0.801178	0.916053	0.125184	0.446244	0.606775	0.821797	0.989691	0.455081	0.327434	0.004418	0.416789	0.57732	0.78056	0.994109	0.37408
0.379015	0.375803	0.245182	0.285102	0.181136	0.180064	0.003212	0.310493	0.594218	0.804069	1	0.002141	0.233405	0.475375	0.755889	0.994647	0.001071	0.223769	0.421842	0.624197	0.981799	0.541756	0.114561	0.343683	0.049303	0.085745	0.004287	0.001071	0.182013	0.533191	0.771949	1	0.093148	0.266595	0.431478	0.656317	0.87152	0.108137	0.283726	0.518201	0.680942	0.996788	0.395075	0.323687	0.005353	0.218415	0.404711	0.583512	0.979657	0.404711
0.36831	0.307746	0.323944	0.212121	0.230444	0.206483	0.001408	0.234507	0.45	0.734507	0.999296	0.002113	0.273944	0.529577	0.748592	0.997183	0.000704	0.247183	0.505634	0.764789	1	0.538732	0.35493	0.106338	0.11346	0.03876	0.007752	0.000704	0.249296	0.502817	0.716901	1	0.009155	0.232394	0.467606	0.740141	0.933099	0.002113	0.25	0.673239	0.95493	0.998592	0.585915	0.283298	0.002113	0.25493	0.494366	0.761972	0.997887	0.347183
0.358491	0.311321	0.330189	0.218009	0.222749	0.180095	0.009434	0.25	0.54717	0.801887	1	0.014151	0.193396	0.424528	0.698113	0.976415	0.004717	0.29717	0.523585	0.688679	0.995283	0.556604	0.169811	0.273585	0.056872	0.066351	0	0.004717	0.141509	0.396226	0.660377	1	0.174528	0.528302	0.693396	0.754717	0.985849	0.066038	0.334906	0.584906	0.792453	0.929245	0.45283	0.331754	0.099057	0.34434	0.566038	0.707547	0.995283	0.353774
0.355691	0.349593	0.294715	0.258656	0.221996	0.183299	0.004065	0.20935	0.473577	0.73374	0.997967	0.006098	0.292683	0.54878	0.735772	1	0.002033	0.25813	0.455285	0.784553	0.995935	0.477642	0.119919	0.402439	0.05499	0.06721	0.022403	0.002033	0.243902	0.546748	0.715447	1	0.018293	0.237805	0.412602	0.878049	0.95935	0.081301	0.247967	0.479675	0.780488	0.995935	0.46748	0.403259	0.014228	0.268293	0.485772	0.808943	0.995935	0.333333
0.359844	0.380704	0.259452	0.249347	0.165796	0.184073	0.005215	0.284224	0.571056	0.837027	0.993481	0.002608	0.228162	0.507171	0.730117	0.994785	0.001304	0.237288	0.436767	0.649283	1	0.435463	0.11734	0.447197	0.049608	0.073107	0.005222	0.001304	0.249022	0.505867	0.756193	1	0.02086	0.241199	0.380704	0.542373	0.998696	0.039113	0.26206	0.550196	0.799218	0.986962	0.448501	0.336815	0.023468	0.209909	0.413299	0.601043	0.997392	0.422425
0.307407	0.333333	0.359259	0.193309	0.230483	0.215613	0.007407	0.214815	0.47037	0.762963	0.996296	0.011111	0.225926	0.459259	0.714815	0.992593	0.003704	0.262963	0.514815	0.759259	1	0.511111	0.255556	0.233333	0.089219	0.05948	0	0.003704	0.207407	0.414815	0.722222	1	0.17037	0.27037	0.551852	0.774074	0.914815	0.051852	0.111111	0.5	0.82963	0.992593	0.537037	0.342007	0.014815	0.337037	0.548148	0.759259	0.985185	0.385185
0.498559	0.270893	0.230548	0.242775	0.231214	0.138728	0.008646	0.216138	0.414986	0.752161	0.994236	0.005764	0.311239	0.527378	0.723343	0.991354	0.002882	0.308357	0.510086	0.731988	1	0.487032	0.069164	0.443804	0.040462	0.080925	0	0.002882	0.247839	0.420749	0.668588	1	0.011527	0.051873	0.423631	0.504323	0.59366	0.095101	0.345821	0.616715	0.778098	0.994236	0.291066	0.312139	0.014409	0.420749	0.585014	0.720461	0.997118	0.340058
0.316832	0.368317	0.314851	0.240079	0.188492	0.257937	0.005941	0.275248	0.534653	0.790099	0.99604	0.011881	0.253465	0.510891	0.730693	1	0.00198	0.19604	0.457426	0.720792	0.99802	0.524752	0.160396	0.314851	0.081349	0.077381	0.001984	0.00198	0.273267	0.566337	0.809901	1	0.071287	0.285149	0.481188	0.718812	0.972277	0.011881	0.19604	0.423762	0.669307	0.990099	0.534653	0.365079	0.007921	0.243564	0.471287	0.752475	0.990099	0.39802
0.414634	0.231707	0.353659	0.234568	0.345679	0.135802	0.02439	0.243902	0.414634	0.682927	1	0.04878	0.390244	0.585366	0.768293	0.878049	0.012195	0.182927	0.45122	0.695122	0.987805	0.341463	0.304878	0.353659	0.098765	0.049383	0	0.012195	0.243902	0.414634	0.634146	1	0.304878	0.365854	0.47561	0.621951	0.987805	0.085366	0.158537	0.682927	0.768293	0.865854	0.487805	0.469136	0.04878	0.182927	0.560976	0.743902	0.97561	0.280488
0.446429	0.196429	0.357143	0.153153	0.306306	0.171171	0.017857	0.1875	0.535714	0.821429	1	0.044643	0.276786	0.401786	0.625	0.955357	0.008929	0.223214	0.464286	0.714286	0.991071	0.294643	0.232143	0.473214	0.09009	0.072072	0	0.008929	0.1875	0.401786	0.678571	1	0.035714	0.196429	0.276786	0.366071	0.723214	0.098214	0.446429	0.5625	0.839286	0.964286	0.428571	0.396396	0.044643	0.276786	0.464286	0.705357	0.928571	0.160714
0.307971	0.362319	0.32971	0.210909	0.221818	0.210909	0.021739	0.26087	0.518116	0.768116	1	0.007246	0.221014	0.42029	0.721014	0.996377	0.003623	0.289855	0.51087	0.742754	0.98913	0.460145	0.257246	0.282609	0.087273	0.058182	0	0.003623	0.242754	0.423913	0.677536	1	0.123188	0.221014	0.5	0.721014	0.858696	0.007246	0.380435	0.561594	0.913043	0.985507	0.550725	0.356364	0.014493	0.304348	0.528986	0.742754	0.98913	0.427536
0.361345	0.305322	0.333333	0.202247	0.219101	0.233146	0.016807	0.243697	0.518207	0.759104	0.994398	0.005602	0.252101	0.47619	0.722689	1	0.002801	0.232493	0.464986	0.739496	0.997199	0.408964	0.140056	0.45098	0.058989	0.070225	0.008427	0.002801	0.226891	0.509804	0.680672	1	0.011204	0.173669	0.27451	0.621849	0.831933	0.078431	0.319328	0.518207	0.826331	0.983193	0.467787	0.376404	0.011204	0.260504	0.467787	0.770308	0.985994	0.308123
0.329082	0.42602	0.244898	0.255754	0.153453	0.196931	0.010204	0.247449	0.408163	0.719388	0.969388	0.005102	0.331633	0.540816	0.790816	1	0.002551	0.196429	0.431122	0.709184	0.997449	0.553571	0.145408	0.30102	0.061381	0.066496	0.005115	0.002551	0.32398	0.538265	0.80102	1	0.081633	0.135204	0.454082	0.704082	0.84949	0.015306	0.221939	0.367347	0.729592	0.987245	0.471939	0.373402	0.012755	0.239796	0.5	0.790816	0.997449	0.469388
0.415842	0.29703	0.287129	0.23	0.27	0.17	0.029703	0.227723	0.485149	0.653465	0.970297	0.019802	0.346535	0.574257	0.772277	0.990099	0.009901	0.19802	0.415842	0.732673	1	0.366337	0.029703	0.60396	0.02	0.1	0	0.009901	0.514851	0.623762	0.772277	1	0.950495	0.950495	0.950495	0.960396	0.970297	0.029703	0.168317	0.316832	0.594059	0.881188	0.386139	0.46	0.049505	0.29703	0.623762	0.792079	0.950495	0.29703
0.346961	0.331492	0.321547	0.221239	0.220133	0.210177	0.00221	0.275138	0.524862	0.78232	1	0.00663	0.232044	0.456354	0.717127	0.99558	0.001105	0.228729	0.496133	0.728177	0.981215	0.418785	0.128177	0.453039	0.054204	0.080752	0.001106	0.001105	0.245304	0.516022	0.770166	1	0.00221	0.342541	0.477348	0.643094	0.977901	0.014365	0.20663	0.509392	0.754696	0.994475	0.517127	0.391593	0.003315	0.257459	0.510497	0.708287	0.99337	0.358011
0.340426	0.326241	0.333333	0.25	0.207143	0.235714	0.014184	0.269504	0.475177	0.64539	0.957447	0.021277	0.212766	0.524823	0.77305	0.985816	0.007092	0.219858	0.468085	0.794326	1	0.411348	0.319149	0.269504	0.15	0.05	0.007143	0.007092	0.22695	0.546099	0.702128	1	0.198582	0.446809	0.609929	0.822695	0.992908	0.070922	0.12766	0.262411	0.326241	0.921986	0.489362	0.414286	0.035461	0.234043	0.496454	0.787234	0.992908	0.347518
0.392694	0.307458	0.299848	0.243902	0.22561	0.193598	0.018265	0.304414	0.5586	0.785388	0.998478	0.003044	0.200913	0.462709	0.724505	1	0.001522	0.21309	0.459665	0.704718	0.987823	0.445967	0.028919	0.525114	0.01372	0.105183	0.001524	0.001522	0.296804	0.519026	0.774734	1	0.266362	0.270928	0.283105	0.452055	0.916286	0.016743	0.208524	0.494673	0.741248	0.987823	0.4414	0.39939	0.012177	0.222222	0.462709	0.710807	0.987823	0.340944
0.295082	0.472131	0.232787	0.223684	0.190789	0.180921	0.013115	0.2	0.367213	0.580328	0.993443	0.006557	0.390164	0.652459	0.829508	1	0.003279	0.134426	0.380328	0.645902	0.996721	0.691803	0.098361	0.209836	0.039474	0.072368	0	0.003279	0.321311	0.514754	0.740984	1	0.013115	0.101639	0.134426	0.213115	0.354098	0.052459	0.163934	0.609836	0.84918	0.95082	0.468852	0.440789	0.009836	0.285246	0.531148	0.72459	0.937705	0.47541
0.413534	0.270677	0.315789	0.242424	0.212121	0.128788	0.030075	0.240602	0.556391	0.796992	0.992481	0.022556	0.225564	0.413534	0.578947	1	0.007519	0.255639	0.503759	0.699248	0.984962	0.270677	0.360902	0.368421	0.045455	0.075758	0.015152	0.007519	0.120301	0.330827	0.609023	1	0.150376	0.669173	0.759398	0.864662	0.954887	0.052632	0.263158	0.383459	0.518797	0.977444	0.406015	0.424242	0.150376	0.300752	0.511278	0.699248	0.93985	0.300752
0.319635	0.328767	0.351598	0.229358	0.206422	0.229358	0.009132	0.242009	0.493151	0.762557	1	0.027397	0.255708	0.406393	0.634703	0.981735	0.004566	0.214612	0.575342	0.789954	0.986301	0.515982	0.173516	0.310502	0.073394	0.055046	0	0.004566	0.292237	0.420091	0.703196	1	0.009132	0.050228	0.13242	0.744292	0.931507	0.16895	0.242009	0.579909	0.808219	0.986301	0.506849	0.394495	0.013699	0.242009	0.52968	0.785388	0.986301	0.310502
0.287671	0.369863	0.342466	0.206897	0.234483	0.255172	0.047945	0.294521	0.575342	0.780822	0.993151	0.013699	0.212329	0.479452	0.657534	1	0.006849	0.184932	0.493151	0.767123	0.986301	0.390411	0.219178	0.390411	0.068966	0.096552	0	0.006849	0.164384	0.458904	0.657534	1	0.020548	0.068493	0.431507	0.506849	0.986301	0.171233	0.308219	0.575342	0.835616	0.945205	0.479452	0.496552	0.027397	0.232877	0.479452	0.726027	0.979452	0.410959
0.363333	0.325	0.311667	0.198664	0.237062	0.215359	0.005	0.233333	0.5	0.793333	1	0.013333	0.291667	0.51	0.771667	0.998333	0.001667	0.23	0.461667	0.675	0.996667	0.506667	0.143333	0.35	0.0601	0.106845	0.006678	0.001667	0.286667	0.53	0.775	1	0.048333	0.173333	0.578333	0.728333	0.945	0.006667	0.233333	0.393333	0.651667	0.996667	0.488333	0.404007	0.01	0.236667	0.515	0.725	0.995	0.326667
0.37037	0.259259	0.37037	0.175	0.3	0.1875	0.074074	0.234568	0.493827	0.666667	0.975309	0.024691	0.08642	0.37037	0.716049	1	0.012346	0.333333	0.518519	0.753086	0.987654	0.432099	0.444444	0.123457	0.1625	0.0375	0.0125	0.012346	0.185185	0.54321	0.802469	1	0.209877	0.358025	0.580247	0.753086	0.950617	0.098765	0.111111	0.148148	0.17284	0.481481	0.493827	0.375	0.08642	0.37037	0.518519	0.777778	0.987654	0.296296
0.386207	0.324138	0.289655	0.298611	0.1875	0.229167	0.034483	0.289655	0.462069	0.703448	0.986207	0.013793	0.241379	0.517241	0.751724	0.993103	0.006897	0.151724	0.434483	0.724138	1	0.462069	0.144828	0.393103	0.097222	0.083333	0.013889	0.006897	0.234483	0.510345	0.772414	1	0.068966	0.117241	0.268966	0.703448	0.903448	0.131034	0.289655	0.427586	0.655172	0.958621	0.42069	0.333333	0.062069	0.17931	0.372414	0.696552	0.972414	0.372414
0.350746	0.264925	0.384328	0.168539	0.265918	0.202247	0.018657	0.242537	0.503731	0.742537	0.992537	0.007463	0.186567	0.414179	0.664179	1	0.003731	0.291045	0.570896	0.779851	0.996269	0.380597	0.175373	0.44403	0.052434	0.097378	0	0.003731	0.156716	0.455224	0.675373	1	0.126866	0.287313	0.395522	0.608209	0.701493	0.022388	0.253731	0.507463	0.824627	0.988806	0.552239	0.419476	0.018657	0.238806	0.477612	0.679104	0.996269	0.257463
0.385396	0.273834	0.340771	0.207317	0.26626	0.191057	0.008114	0.247465	0.488844	0.758621	1	0.004057	0.245436	0.541582	0.74645	0.991886	0.002028	0.237323	0.470588	0.724138	0.98783	0.25355	0.083164	0.663286	0.026423	0.067073	0.006098	0.002028	0.383367	0.647059	0.805274	1	0.320487	0.375254	0.444219	0.965517	0.98783	0.008114	0.180527	0.466531	0.669371	0.945233	0.51927	0.426829	0.010142	0.31643	0.541582	0.760649	0.98783	0.281947
0.414414	0.283784	0.301802	0.257919	0.20362	0.18552	0.009009	0.265766	0.481982	0.783784	0.990991	0.013514	0.220721	0.536036	0.761261	0.986486	0.004505	0.207207	0.459459	0.671171	1	0.342342	0.063063	0.594595	0.027149	0.099548	0	0.004505	0.292793	0.378378	0.675676	1	0.603604	0.612613	0.630631	0.657658	0.684685	0.022523	0.225225	0.495495	0.774775	0.986486	0.481982	0.479638	0.013514	0.225225	0.486486	0.72973	0.986486	0.297297
0.399123	0.312865	0.288012	0.240117	0.199122	0.207906	0.004386	0.182749	0.394737	0.767544	0.998538	0.002924	0.288012	0.523392	0.755848	0.989766	0.001462	0.352339	0.542398	0.716374	1	0.577485	0.109649	0.312865	0.054173	0.083455	0.001464	0.001462	0.194444	0.428363	0.760234	1	0.00731	0.410819	0.498538	0.679825	0.973684	0.019006	0.374269	0.568713	0.748538	0.998538	0.409357	0.330893	0.008772	0.394737	0.559942	0.72076	0.994152	0.340643
0.427711	0.355422	0.216867	0.260606	0.169697	0.163636	0.03012	0.319277	0.572289	0.777108	1	0.012048	0.210843	0.493976	0.807229	0.993976	0.006024	0.174699	0.36747	0.536145	0.879518	0.554217	0.174699	0.271084	0.060606	0.060606	0.012121	0.006024	0.343373	0.722892	0.861446	1	0.024096	0.060241	0.295181	0.373494	0.554217	0.096386	0.156627	0.433735	0.518072	0.710843	0.445783	0.387879	0.024096	0.222892	0.433735	0.753012	0.975904	0.39759
0.307159	0.422633	0.270208	0.24537	0.324074	0.203704	0.004619	0.233256	0.48037	0.745958	0.993072	0.002309	0.242494	0.491917	0.743649	1	0.006928	0.251732	0.498845	0.732102	0.995381	0.817552	0.182448	0	0.111111	0	0	0.002309	0.240185	0.48037	0.73903	1	0.057737	0.307159	0.575058	0.833718	0.979215	0	0	0	0	0	0.406467	0.74537	0.011547	0.254042	0.512702	0.732102	0.995381	0.602771
0.376623	0.272727	0.350649	0.184211	0.328947	0.184211	0.064935	0.207792	0.532468	0.714286	1	0.168831	0.363636	0.467532	0.74026	0.974026	0.012987	0.12987	0.376623	0.636364	0.948052	0.311688	0.272727	0.415584	0.105263	0.052632	0	0.012987	0.25974	0.428571	0.597403	1	0.051948	0.376623	0.493506	0.558442	0.675325	0.090909	0.181818	0.766234	0.87013	0.974026	0.441558	0.421053	0.051948	0.233766	0.493506	0.662338	0.948052	0.272727
0.324228	0.350356	0.325416	0.239001	0.210464	0.224732	0.008314	0.238717	0.486936	0.73753	0.998812	0.003563	0.251781	0.534442	0.774347	0.996437	0.001188	0.239905	0.480998	0.726841	1	0.406176	0.2019	0.391924	0.070155	0.084423	0.008323	0.001188	0.249406	0.526128	0.756532	1	0.004751	0.23753	0.566508	0.700713	0.947743	0.007126	0.25772	0.396675	0.748219	0.997625	0.598575	0.35434	0.004751	0.220903	0.488124	0.752969	0.996437	0.385986
0.369863	0.332192	0.297945	0.250859	0.209622	0.216495	0.010274	0.222603	0.520548	0.760274	0.993151	0.006849	0.318493	0.486301	0.719178	0.996575	0.003425	0.215753	0.476027	0.732877	1	0.30137	0.089041	0.609589	0.030928	0.079038	0.003436	0.003425	0.178082	0.506849	0.770548	1	0.010274	0.027397	0.078767	0.106164	0.174658	0.143836	0.349315	0.547945	0.75	0.962329	0.506849	0.357388	0.013699	0.267123	0.493151	0.722603	0.952055	0.291096
0.371698	0.398113	0.230189	0.272899	0.15864	0.169027	0.003774	0.185849	0.551887	0.791509	1	0.007547	0.281132	0.44717	0.699057	0.99717	0.000943	0.279245	0.523585	0.754717	0.998113	0.674528	0.075472	0.25	0.036827	0.051936	0.002833	0.000943	0.239623	0.435849	0.685849	1	0.204717	0.50566	0.59717	0.733962	0.968868	0.00566	0.128302	0.662264	0.816981	0.993396	0.39717	0.381492	0.00566	0.285849	0.479245	0.703774	0.998113	0.4
0.379032	0.419355	0.201613	0.341463	0.170732	0.130081	0.032258	0.217742	0.395161	0.653226	1	0.016129	0.258065	0.556452	0.830645	0.983871	0.008065	0.16129	0.483871	0.66129	0.951613	0.572581	0.048387	0.379032	0.056911	0.04065	0.00813	0.008065	0.258065	0.669355	0.814516	1	0.66129	0.66129	0.879032	0.887097	0.951613	0.080645	0.16129	0.33871	0.435484	0.653226	0.346774	0.406504	0.104839	0.193548	0.459677	0.677419	0.951613	0.435484
0.378687	0.355852	0.265461	0.260952	0.217143	0.202857	0.001903	0.221694	0.49001	0.736441	0.996194	0.002854	0.24548	0.47098	0.75452	1	0.000951	0.284491	0.533777	0.758325	0.994291	0.574691	0.137964	0.287345	0.069524	0.082857	0.012381	0.000951	0.2255	0.472883	0.745956	1	0.003806	0.23216	0.440533	0.771646	0.973359	0.031399	0.328259	0.579448	0.699334	0.995243	0.378687	0.447619	0.002854	0.276879	0.510942	0.778306	0.994291	0.392008
0.404255	0.223404	0.37234	0.204301	0.301075	0.182796	0.042553	0.265957	0.542553	0.744681	1	0.021277	0.244681	0.478723	0.712766	0.978723	0.010638	0.202128	0.425532	0.670213	0.946809	0.404255	0.43617	0.159574	0.150538	0.043011	0.021505	0.010638	0.159574	0.62766	0.776596	1	0.106383	0.361702	0.5	0.755319	0.93617	0.085106	0.170213	0.212766	0.255319	0.56383	0.553191	0.408602	0.095745	0.297872	0.5	0.691489	0.946809	0.223404
0.272849	0.467742	0.259409	0.22611	0.164199	0.230148	0.009409	0.307796	0.567204	0.748656	0.995968	0.004032	0.181452	0.392473	0.724462	1	0.001344	0.358871	0.571237	0.762097	0.991935	0.646505	0.120968	0.232527	0.047106	0.063257	0.004038	0.001344	0.18414	0.408602	0.776882	1	0.094086	0.525538	0.668011	0.737903	0.979839	0.163978	0.372312	0.538978	0.700269	0.97043	0.478495	0.374159	0.033602	0.194892	0.549731	0.754032	0.990591	0.452957
0.388797	0.341021	0.270181	0.264026	0.188119	0.168317	0.009885	0.172982	0.425041	0.721582	0.998353	0.004942	0.266886	0.520593	0.759473	0.990115	0.001647	0.359143	0.555189	0.769357	1	0.487644	0.149918	0.362438	0.054455	0.087459	0.00495	0.001647	0.16145	0.299835	0.609555	1	0.008237	0.494234	0.68369	0.843493	0.924217	0.06425	0.410214	0.593081	0.785832	0.996705	0.484349	0.359736	0.003295	0.390445	0.561779	0.775947	0.99341	0.372323
0.331412	0.391931	0.276657	0.291908	0.196532	0.205202	0.005764	0.221902	0.455331	0.731988	1	0.017291	0.25072	0.510086	0.78098	0.994236	0.002882	0.236311	0.51585	0.73487	0.988473	0.299712	0.288184	0.412104	0.078035	0.072254	0.00289	0.002882	0.319885	0.501441	0.729107	1	0.123919	0.342939	0.489914	0.639769	0.933718	0.008646	0.227666	0.538905	0.861671	0.994236	0.501441	0.358382	0.011527	0.270893	0.530259	0.740634	0.991354	0.420749
0.390459	0.272085	0.337456	0.215929	0.270796	0.226549	0.0053	0.265018	0.510601	0.773852	1	0.003534	0.210247	0.484099	0.710247	0.992933	0.001767	0.256184	0.501767	0.734982	0.998233	0.397527	0.393993	0.208481	0.113274	0.046018	0.017699	0.001767	0.263251	0.558304	0.773852	1	0.040636	0.226148	0.496466	0.69258	0.925795	0.0053	0.174912	0.397527	0.779152	0.992933	0.44523	0.4	0.008834	0.240283	0.484099	0.722615	0.992933	0.305654
0.411111	0.288889	0.3	0.258427	0.247191	0.191011	0.055556	0.266667	0.544444	0.788889	1	0.022222	0.177778	0.377778	0.611111	0.988889	0.011111	0.277778	0.477778	0.744444	0.966667	0.277778	0	0.722222	0	0.089888	0	0.011111	0.177778	0.244444	0.544444	1	0	0	0	0	0	0.055556	0.333333	0.566667	0.744444	0.944444	0.4	0.449438	0.033333	0.311111	0.477778	0.733333	0.966667	0.288889
0.358108	0.304054	0.337838	0.231293	0.244898	0.217687	0.040541	0.263514	0.452703	0.648649	0.986486	0.013514	0.141892	0.466216	0.695946	0.993243	0.006757	0.310811	0.608108	0.837838	1	0.310811	0.364865	0.324324	0.095238	0.054422	0	0.006757	0.209459	0.52027	0.709459	1	0.047297	0.141892	0.263514	0.587838	0.695946	0.378378	0.452703	0.804054	0.885135	0.966216	0.567568	0.353741	0.047297	0.25	0.533784	0.777027	0.97973	0.304054
0.356955	0.370079	0.272966	0.226316	0.2	0.181579	0.007874	0.314961	0.608924	0.834646	0.997375	0.005249	0.160105	0.430446	0.658793	1	0.002625	0.257218	0.493438	0.708661	0.955381	0.614173	0.175853	0.209974	0.065789	0.039474	0.002632	0.002625	0.223097	0.490814	0.779528	1	0.115486	0.204724	0.446194	0.690289	0.818898	0.073491	0.278215	0.564304	0.750656	0.989501	0.364829	0.342105	0.010499	0.259843	0.480315	0.711286	0.955381	0.391076
0.358974	0.325444	0.315582	0.195652	0.241107	0.219368	0.005917	0.228797	0.420118	0.704142	1	0.013807	0.301775	0.57002	0.753452	0.988166	0.001972	0.230769	0.536489	0.771203	0.996055	0.43787	0.187377	0.374753	0.065217	0.081028	0.005929	0.001972	0.303748	0.526627	0.77712	1	0.045365	0.187377	0.542406	0.798817	0.954635	0.00789	0.224852	0.416174	0.700197	0.994083	0.493097	0.387352	0.00789	0.266272	0.581854	0.765286	0.996055	0.380671
0.329258	0.380786	0.289956	0.246503	0.181818	0.222028	0.004367	0.230568	0.510044	0.719651	0.998253	0.001747	0.273362	0.50393	0.777293	0.999127	0.000873	0.256769	0.478603	0.737991	1	0.464629	0.126638	0.408734	0.050699	0.082168	0.003497	0.000873	0.215721	0.50131	0.761572	1	0.039301	0.28821	0.396507	0.669869	0.988646	0.020087	0.259389	0.527511	0.764192	0.99738	0.526638	0.358392	0.017467	0.254148	0.468996	0.71441	0.993886	0.401747
0.396694	0.198347	0.404959	0.175	0.308333	0.183333	0.016529	0.214876	0.495868	0.694215	0.983471	0.049587	0.280992	0.454545	0.793388	1	0.008264	0.247934	0.479339	0.743802	0.991736	0.214876	0.173554	0.61157	0.066667	0.1	0.016667	0.008264	0.082645	0.396694	0.793388	1	0.024793	0.330579	0.413223	0.743802	0.85124	0.090909	0.231405	0.545455	0.719008	0.983471	0.53719	0.45	0.024793	0.247934	0.454545	0.752066	0.966942	0.157025
0.346908	0.315234	0.337858	0.21148	0.238671	0.234139	0.003017	0.269985	0.552036	0.775264	0.996983	0.004525	0.199095	0.434389	0.707391	1	0.001508	0.28356	0.514329	0.745098	0.998492	0.411765	0.162896	0.425339	0.070997	0.070997	0.004532	0.001508	0.26546	0.496229	0.822021	1	0.003017	0.182504	0.377074	0.886878	0.998492	0.027149	0.248869	0.527903	0.671192	0.924585	0.544495	0.392749	0.004525	0.250377	0.475113	0.711916	0.998492	0.33635
0.381443	0.313402	0.305155	0.239669	0.247934	0.181818	0.008247	0.23299	0.51134	0.754639	0.997938	0.004124	0.265979	0.492784	0.750515	0.985567	0.002062	0.253608	0.496907	0.740206	1	0.397938	0.179381	0.42268	0.070248	0.103306	0.004132	0.002062	0.290722	0.519588	0.773196	1	0.096907	0.239175	0.501031	0.748454	0.925773	0.006186	0.191753	0.453608	0.676289	0.995876	0.529897	0.409091	0.006186	0.270103	0.474227	0.707216	0.991753	0.346392
0.373606	0.405204	0.22119	0.255121	0.148976	0.188082	0.005576	0.369888	0.635688	0.834572	1	0.003717	0.224907	0.39777	0.654275	0.994424	0.001859	0.159851	0.468401	0.684015	0.996283	0.546468	0.013011	0.44052	0.009311	0.083799	0.001862	0.001859	0.245353	0.3829	0.669145	1	0.420074	0.420074	0.942379	0.990706	0.994424	0.01487	0.169145	0.615242	0.765799	0.94052	0.381041	0.357542	0.013011	0.19145	0.477695	0.674721	0.996283	0.442379
0.340836	0.363344	0.29582	0.245161	0.183871	0.2	0.009646	0.308682	0.578778	0.778135	1	0.006431	0.167203	0.434084	0.649518	0.996785	0.003215	0.276527	0.517685	0.77492	0.990354	0.421222	0.221865	0.356913	0.077419	0.058065	0	0.003215	0.167203	0.44373	0.649518	1	0.051447	0.196141	0.418006	0.755627	0.945338	0.096463	0.366559	0.572347	0.829582	0.983923	0.546624	0.335484	0.054662	0.237942	0.472669	0.726688	0.990354	0.379421
0.377358	0.330189	0.292453	0.266667	0.228571	0.2	0.018868	0.188679	0.40566	0.754717	0.981132	0.066038	0.301887	0.528302	0.745283	1	0.009434	0.226415	0.471698	0.679245	0.990566	0.443396	0.556604	0	0.190476	0	0	0.009434	0.188679	0.481132	0.726415	1	0.037736	0.235849	0.537736	0.773585	0.981132	0	0	0	0	0	0.45283	0.32381	0.037736	0.254717	0.537736	0.669811	0.971698	0.358491
0.278245	0.489183	0.232572	0.243536	0.129886	0.230307	0.002404	0.246394	0.461538	0.798077	1	0.001202	0.278846	0.527043	0.740986	0.996394	0.000601	0.218149	0.451322	0.701322	0.998798	0.798077	0.061899	0.140024	0.036681	0.039086	0.003007	0.000601	0.289062	0.507212	0.715745	1	0.03125	0.220553	0.719952	0.859375	0.971154	0.001803	0.092548	0.28726	0.846154	0.998798	0.291466	0.340349	0.007212	0.167067	0.413462	0.751803	0.998798	0.521034
0.259542	0.381679	0.358779	0.215385	0.215385	0.284615	0.022901	0.167939	0.412214	0.618321	0.954198	0.015267	0.274809	0.610687	0.80916	1	0.007634	0.244275	0.465649	0.732824	0.992366	0.381679	0.343511	0.274809	0.176923	0.053846	0.007692	0.007634	0.328244	0.549618	0.717557	1	0.175573	0.381679	0.580153	0.80916	0.992366	0.038168	0.099237	0.251908	0.687023	0.916031	0.48855	0.430769	0.030534	0.267176	0.580153	0.78626	0.992366	0.335878
0.375167	0.381842	0.242991	0.284759	0.168449	0.167112	0.00267	0.214953	0.453939	0.75968	1	0.004005	0.23231	0.503338	0.739653	0.995995	0.001335	0.335113	0.544726	0.735648	0.99733	0.568758	0.130841	0.300401	0.045455	0.072193	0.002674	0.001335	0.158879	0.41522	0.728972	1	0.238985	0.424566	0.611482	0.731642	0.837116	0.004005	0.359146	0.558077	0.774366	0.949266	0.425901	0.339572	0.004005	0.325768	0.522029	0.732977	0.99733	0.421896
0.332	0.368	0.3	0.228916	0.164659	0.232932	0.008	0.22	0.528	0.832	0.996	0.044	0.204	0.4	0.68	1	0.004	0.296	0.54	0.76	0.984	0.464	0.184	0.352	0.052209	0.052209	0.012048	0.004	0.144	0.356	0.624	1	0.18	0.24	0.308	0.564	0.856	0.012	0.472	0.684	0.9	0.988	0.544	0.337349	0.024	0.312	0.552	0.756	0.984	0.412
0.37561	0.35122	0.273171	0.269608	0.254902	0.181373	0.014634	0.195122	0.419512	0.692683	1	0.009756	0.239024	0.502439	0.765854	0.995122	0.004878	0.356098	0.560976	0.77561	0.985366	0.502439	0.165854	0.331707	0.068627	0.088235	0.009804	0.004878	0.156098	0.521951	0.77561	1	0.219512	0.282927	0.619512	0.946341	0.990244	0.039024	0.341463	0.439024	0.721951	0.926829	0.458537	0.470588	0.019512	0.360976	0.517073	0.746341	0.985366	0.317073
0.454545	0.222222	0.323232	0.244898	0.357143	0.081633	0.020202	0.252525	0.454545	0.727273	1	0.030303	0.333333	0.565657	0.666667	0.949495	0.010101	0.171717	0.383838	0.777778	0.979798	0.353535	0.272727	0.373737	0.081633	0.061224	0	0.010101	0.080808	0.434343	0.626263	1	0.10101	0.151515	0.525253	0.646465	0.717172	0.242424	0.323232	0.757576	0.848485	0.979798	0.484848	0.428571	0.050505	0.222222	0.555556	0.777778	0.979798	0.161616
0.341176	0.382353	0.276471	0.248521	0.236686	0.218935	0.023529	0.276471	0.582353	0.841176	0.994118	0.011765	0.170588	0.441176	0.705882	1	0.005882	0.205882	0.411765	0.7	0.970588	0.376471	0.170588	0.452941	0.059172	0.08284	0	0.005882	0.141176	0.364706	0.582353	1	0.023529	0.058824	0.335294	0.4	0.805882	0.135294	0.441176	0.688235	0.852941	0.988235	0.417647	0.508876	0.029412	0.229412	0.441176	0.717647	0.970588	0.417647
0.321321	0.357357	0.321321	0.192771	0.192771	0.262048	0.021021	0.234234	0.432432	0.747748	0.984985	0.006006	0.231231	0.522523	0.78979	1	0.003003	0.255255	0.498498	0.693694	0.993994	0.414414	0.048048	0.537538	0.018072	0.108434	0.006024	0.003003	0.189189	0.525526	0.798799	1	0.537538	0.774775	0.813814	0.825826	0.843844	0.006006	0.264264	0.462462	0.645646	0.984985	0.438438	0.403614	0.012012	0.264264	0.495495	0.696697	0.978979	0.372372
0.412596	0.25964	0.327763	0.217503	0.256113	0.162162	0.005141	0.294344	0.524422	0.744216	0.998715	0.006427	0.191517	0.48329	0.732648	1	0.001285	0.230077	0.460154	0.757069	0.992288	0.356041	0.131105	0.512853	0.047619	0.091377	0.003861	0.001285	0.233933	0.525707	0.745501	1	0.039846	0.170951	0.489717	0.742931	0.90617	0.020566	0.294344	0.471722	0.750643	0.992288	0.521851	0.388674	0.003856	0.194087	0.458869	0.742931	0.997429	0.268638
0.336207	0.327586	0.336207	0.234783	0.234783	0.2	0.017241	0.206897	0.474138	0.681034	0.965517	0.051724	0.275862	0.517241	0.741379	0.982759	0.008621	0.232759	0.465517	0.758621	1	0.224138	0.422414	0.353448	0.052174	0.052174	0.017391	0.008621	0.051724	0.284483	0.577586	1	0.068966	0.655172	0.758621	0.87931	0.991379	0.172414	0.25	0.37069	0.5	0.637931	0.482759	0.486957	0.077586	0.25	0.482759	0.706897	0.982759	0.327586
0.447761	0.291045	0.261194	0.285714	0.24812	0.090226	0.052239	0.268657	0.537313	0.738806	1	0.014925	0.134328	0.402985	0.716418	0.992537	0.007463	0.19403	0.455224	0.746269	0.977612	0.470149	0.485075	0.044776	0.150376	0.015038	0	0.007463	0.335821	0.597015	0.80597	1	0.014925	0.164179	0.365672	0.58209	0.880597	0.947761	0.947761	0.962687	0.970149	0.985075	0.358209	0.43609	0.014925	0.19403	0.402985	0.589552	0.962687	0.291045
0.368932	0.300971	0.330097	0.205882	0.245098	0.205882	0.029126	0.252427	0.475728	0.728155	0.980583	0.048544	0.203883	0.533981	0.757282	0.902913	0.009709	0.15534	0.495146	0.679612	1	0.427184	0.330097	0.242718	0.117647	0.039216	0.019608	0.009709	0.271845	0.640777	0.815534	1	0.116505	0.320388	0.592233	0.708738	0.970874	0.07767	0.194175	0.252427	0.436893	0.504854	0.359223	0.411765	0.038835	0.15534	0.339806	0.572816	0.970874	0.291262
0.417391	0.243478	0.33913	0.192982	0.307018	0.157895	0.017391	0.2	0.469565	0.713043	1	0.052174	0.46087	0.634783	0.852174	0.982609	0.008696	0.182609	0.391304	0.669565	0.991304	0.408696	0.243478	0.347826	0.105263	0.070175	0	0.008696	0.182609	0.46087	0.634783	1	0.2	0.286957	0.391304	0.478261	0.565217	0.078261	0.156522	0.721739	0.843478	0.965217	0.417391	0.491228	0.034783	0.26087	0.486957	0.730435	0.956522	0.278261
0.334694	0.338776	0.326531	0.239782	0.202997	0.220708	0.005442	0.216327	0.482993	0.74966	1	0.002721	0.220408	0.493878	0.736054	0.998639	0.001361	0.296599	0.510204	0.753741	0.994558	0.404082	0.14966	0.446259	0.049046	0.095368	0	0.001361	0.236735	0.526531	0.759184	1	0.134694	0.27483	0.481633	0.536054	0.95102	0.013605	0.206803	0.553741	0.771429	0.987755	0.559184	0.318801	0.004082	0.285714	0.506122	0.729252	0.995918	0.357823
0.419162	0.371257	0.209581	0.319277	0.156627	0.186747	0.023952	0.329341	0.586826	0.838323	1	0.011976	0.221557	0.437126	0.724551	0.976048	0.005988	0.113772	0.383234	0.616766	0.862275	0.550898	0.155689	0.293413	0.078313	0.078313	0.006024	0.005988	0.203593	0.467066	0.748503	1	0.083832	0.113772	0.245509	0.317365	0.868263	0.371257	0.502994	0.664671	0.784431	0.94012	0.299401	0.337349	0.035928	0.167665	0.401198	0.670659	0.862275	0.377246
0.306931	0.39604	0.29703	0.21	0.22	0.29	0.069307	0.306931	0.49505	0.861386	1	0.019802	0.158416	0.415842	0.693069	0.980198	0.009901	0.267327	0.514851	0.653465	0.990099	0.405941	0.178218	0.415842	0.06	0.04	0	0.009901	0.128713	0.405941	0.623762	1	0.069307	0.475248	0.524752	0.564356	0.663366	0.178218	0.267327	0.772277	0.871287	0.980198	0.445545	0.5	0.029703	0.237624	0.524752	0.693069	0.950495	0.39604
0.444142	0.299728	0.256131	0.262295	0.243169	0.136612	0.010899	0.26703	0.550409	0.760218	1	0.00545	0.188011	0.373297	0.629428	0.997275	0.002725	0.3297	0.561308	0.752044	0.989101	0.509537	0.177112	0.313351	0.062842	0.07377	0.002732	0.002725	0.182561	0.362398	0.634877	1	0.029973	0.313351	0.517711	0.790191	0.904632	0.024523	0.46594	0.648501	0.861035	0.991826	0.370572	0.31694	0.016349	0.155313	0.476839	0.73297	0.989101	0.356948
0.413043	0.25	0.336957	0.153846	0.296703	0.241758	0.021739	0.217391	0.434783	0.695652	1	0.076087	0.23913	0.456522	0.717391	0.956522	0.01087	0.184783	0.51087	0.804348	0.98913	0.445652	0.336957	0.217391	0.175824	0.043956	0	0.01087	0.315217	0.641304	0.771739	1	0.032609	0.23913	0.532609	0.793478	0.923913	0.119565	0.163043	0.358696	0.413043	0.467391	0.369565	0.395604	0.032609	0.184783	0.456522	0.771739	0.945652	0.228261
0.401639	0.229508	0.368852	0.165289	0.272727	0.247934	0.02459	0.229508	0.491803	0.737705	1	0.040984	0.270492	0.47541	0.754098	0.991803	0.008197	0.254098	0.459016	0.704918	0.983607	0.418033	0.286885	0.295082	0.140496	0.057851	0.008264	0.008197	0.286885	0.680328	0.819672	1	0.016393	0.204918	0.319672	0.696721	0.95082	0.090164	0.155738	0.532787	0.606557	0.909836	0.442623	0.46281	0.016393	0.262295	0.442623	0.680328	0.983607	0.237705
0.335893	0.414587	0.24952	0.298077	0.157692	0.221154	0.005758	0.295585	0.604607	0.827255	1	0.003839	0.232246	0.445298	0.731286	0.990403	0.001919	0.224568	0.454894	0.62572	0.998081	0.485605	0.049904	0.464491	0.026923	0.084615	0.003846	0.001919	0.222649	0.583493	0.848369	1	0.101727	0.111324	0.245681	0.602687	0.857965	0.015355	0.318618	0.477927	0.65643	0.953935	0.456814	0.342308	0.011516	0.245681	0.443378	0.612284	0.996161	0.397313
0.341677	0.319149	0.339174	0.218045	0.25188	0.223058	0.002503	0.276596	0.516896	0.770964	1	0.005006	0.226533	0.466834	0.71965	0.993742	0.001252	0.242804	0.494368	0.744681	0.997497	0.47184	0.245307	0.282854	0.107769	0.055138	0.002506	0.001252	0.235294	0.491865	0.734668	1	0.038798	0.198999	0.419274	0.797247	0.997497	0.006258	0.315394	0.536921	0.772215	0.992491	0.569462	0.41604	0.003755	0.26408	0.476846	0.743429	0.997497	0.331665
0.344749	0.424658	0.230594	0.279176	0.173913	0.196796	0.004566	0.30137	0.570776	0.787671	0.997717	0.006849	0.194064	0.388128	0.728311	0.993151	0.002283	0.351598	0.538813	0.703196	1	0.671233	0.041096	0.287671	0.02746	0.050343	0	0.002283	0.187215	0.356164	0.753425	1	0.041096	0.047945	0.860731	0.869863	0.965753	0.009132	0.525114	0.614155	0.728311	0.90411	0.390411	0.356979	0.013699	0.26484	0.497717	0.684932	0.984018	0.383562
0.38843	0.38961	0.22196	0.276596	0.165485	0.161939	0.003542	0.272727	0.57379	0.782763	0.998819	0.002361	0.199528	0.433294	0.720189	1	0.001181	0.271547	0.493506	0.668241	0.988194	0.641086	0.085006	0.273908	0.037825	0.082742	0.007092	0.001181	0.250295	0.478158	0.752066	1	0.101535	0.475797	0.5549	0.635183	0.946871	0.023613	0.167651	0.486423	0.787485	0.995277	0.453365	0.352246	0.005903	0.257379	0.439197	0.624557	0.988194	0.416765
0.36747	0.337349	0.295181	0.2	0.254545	0.248485	0.024096	0.319277	0.560241	0.753012	1	0.012048	0.174699	0.421687	0.716867	0.987952	0.006024	0.222892	0.487952	0.73494	0.981928	0.427711	0.180723	0.391566	0.084848	0.084848	0	0.006024	0.150602	0.403614	0.620482	1	0.060241	0.096386	0.391566	0.445783	0.975904	0.180723	0.319277	0.674699	0.789157	0.945783	0.415663	0.472727	0.03012	0.253012	0.475904	0.740964	0.981928	0.39759
0.414938	0.244813	0.340249	0.18711	0.288981	0.191268	0.006224	0.248963	0.497925	0.763485	1	0.008299	0.215768	0.473029	0.690871	0.987552	0.002075	0.26556	0.526971	0.761411	0.993776	0.292531	0.226141	0.481328	0.064449	0.081081	0.002079	0.002075	0.182573	0.495851	0.686722	1	0.093361	0.290456	0.385892	0.558091	0.995851	0.006224	0.242739	0.653527	0.821577	0.966805	0.481328	0.428274	0.010373	0.282158	0.504149	0.732365	0.993776	0.288382
0.398649	0.297297	0.304054	0.244898	0.238095	0.14966	0.013514	0.22973	0.418919	0.716216	1	0.02027	0.297297	0.533784	0.844595	0.993243	0.006757	0.222973	0.5	0.702703	0.97973	0.25	0	0.75	0	0.108844	0	0.006757	0.263514	0.527027	0.797297	1	0	0	0	0	0	0.013514	0.216216	0.452703	0.716216	0.945946	0.513514	0.394558	0.027027	0.297297	0.52027	0.695946	0.905405	0.290541
0.38565	0.318386	0.295964	0.252252	0.247748	0.162162	0.017937	0.224215	0.502242	0.721973	1	0.008969	0.273543	0.430493	0.690583	0.950673	0.004484	0.210762	0.600897	0.798206	0.986547	0.506726	0.125561	0.367713	0.058559	0.058559	0.004505	0.004484	0.295964	0.421525	0.704036	1	0.080717	0.139013	0.609865	0.762332	0.932735	0.017937	0.201794	0.55157	0.793722	0.986547	0.497758	0.378378	0.026906	0.300448	0.533632	0.789238	0.986547	0.331839
0.383562	0.321918	0.294521	0.213793	0.255172	0.213793	0.013699	0.253425	0.589041	0.808219	0.986301	0.109589	0.280822	0.479452	0.719178	0.993151	0.006849	0.171233	0.376712	0.657534	1	0.575342	0.260274	0.164384	0.075862	0.062069	0.006897	0.006849	0.349315	0.547945	0.821918	1	0.09589	0.178082	0.280822	0.561644	0.657534	0.020548	0.054795	0.458904	0.719178	0.90411	0.417808	0.413793	0.020548	0.246575	0.431507	0.616438	0.931507	0.356164
0.271357	0.522613	0.20603	0.262626	0.121212	0.207071	0.01005	0.226131	0.502513	0.743719	0.98995	0.045226	0.271357	0.562814	0.798995	1	0.005025	0.231156	0.40201	0.547739	0.964824	0.648241	0.201005	0.150754	0.070707	0.020202	0	0.005025	0.180905	0.60804	0.834171	1	0.025126	0.326633	0.492462	0.638191	0.698492	0.226131	0.256281	0.361809	0.396985	0.437186	0.351759	0.262626	0.020101	0.251256	0.386935	0.532663	0.964824	0.537688
0.295172	0.423448	0.281379	0.251381	0.189227	0.226519	0.006897	0.22069	0.502069	0.754483	1	0.002759	0.263448	0.504828	0.765517	0.994483	0.001379	0.24	0.474483	0.715862	0.998621	0.394483	0.17931	0.426207	0.087017	0.075967	0.006906	0.001379	0.246897	0.528276	0.827586	1	0.026207	0.195862	0.368276	0.871724	0.983448	0.048276	0.296552	0.521379	0.678621	0.924138	0.515862	0.361878	0.009655	0.25931	0.468966	0.691034	0.998621	0.431724
0.289308	0.396226	0.314465	0.214173	0.162205	0.248819	0.004717	0.238994	0.449686	0.756289	1	0.003145	0.215409	0.492138	0.746855	0.993711	0.001572	0.306604	0.528302	0.743711	0.996855	0.319182	0.006289	0.674528	0	0.119685	0.006299	0.001572	0.083333	0.371069	0.68239	1	0.528302	0.528302	0.949686	0.951258	0.95283	0.012579	0.289308	0.556604	0.759434	0.996855	0.512579	0.381102	0.006289	0.306604	0.561321	0.764151	0.996855	0.404088
0.316312	0.419858	0.26383	0.235795	0.176136	0.203125	0.002837	0.2	0.492199	0.741844	0.998582	0.004255	0.249645	0.476596	0.780142	1	0.001418	0.286525	0.539007	0.73617	0.982979	0.607092	0.15461	0.238298	0.066761	0.066761	0.007102	0.001418	0.228369	0.446809	0.780142	1	0.038298	0.324823	0.631206	0.714894	0.98156	0.008511	0.248227	0.519149	0.726241	0.950355	0.507801	0.440341	0.009929	0.273759	0.52766	0.734752	0.984397	0.41844
0.366133	0.313501	0.320366	0.227064	0.263761	0.188073	0.006865	0.240275	0.498856	0.759725	0.990847	0.009153	0.228833	0.487414	0.734554	1	0.002288	0.267735	0.496568	0.73913	0.995423	0.402746	0.189931	0.407323	0.073394	0.082569	0.004587	0.002288	0.295195	0.517162	0.773455	1	0.100686	0.249428	0.489703	0.743707	0.935927	0.009153	0.196796	0.439359	0.681922	0.981693	0.544622	0.417431	0.009153	0.265446	0.487414	0.702517	0.995423	0.340961
0.295775	0.394366	0.309859	0.257143	0.142857	0.285714	0.084507	0.239437	0.492958	0.704225	0.929577	0.070423	0.295775	0.577465	0.859155	0.985915	0.014085	0.169014	0.323944	0.56338	1	0.43662	0.366197	0.197183	0.142857	0.028571	0	0.014085	0.239437	0.549296	0.887324	1	0.028169	0.098592	0.28169	0.408451	0.591549	0.619718	0.647887	0.704225	0.746479	0.802817	0.366197	0.371429	0.028169	0.169014	0.352113	0.521127	0.71831	0.394366
0.419708	0.383212	0.19708	0.285714	0.190476	0.14652	0.014599	0.215328	0.452555	0.711679	0.992701	0.007299	0.262774	0.554745	0.773723	0.99635	0.00365	0.310219	0.419708	0.726277	1	0.656934	0.083942	0.259124	0.029304	0.058608	0	0.00365	0.208029	0.448905	0.715328	1	0.313869	0.328467	0.423358	0.474453	0.576642	0.010949	0.372263	0.605839	0.828467	0.992701	0.357664	0.380952	0.010949	0.321168	0.474453	0.806569	0.989051	0.39781
0.45092	0.392638	0.156442	0.378462	0.12	0.098462	0.006135	0.315951	0.527607	0.760736	0.993865	0.009202	0.340491	0.625767	0.834356	1	0.003067	0.113497	0.199387	0.312883	0.745399	0.671779	0.101227	0.226994	0.067692	0.092308	0	0.003067	0.346626	0.558282	0.757669	1	0.052147	0.122699	0.233129	0.325153	0.518405	0.01227	0.171779	0.47546	0.806748	0.98773	0.220859	0.276923	0.009202	0.156442	0.257669	0.441718	0.97546	0.380368
0.396694	0.280992	0.322314	0.195021	0.282158	0.186722	0.012397	0.22314	0.446281	0.735537	1	0.008264	0.305785	0.508264	0.719008	0.979339	0.004132	0.206612	0.516529	0.77686	0.991736	0.458678	0.202479	0.338843	0.091286	0.091286	0	0.004132	0.165289	0.442149	0.702479	1	0.086777	0.256198	0.479339	0.72314	0.929752	0.012397	0.355372	0.533058	0.772727	0.983471	0.429752	0.431535	0.020661	0.305785	0.520661	0.739669	0.991736	0.280992
0.334247	0.386301	0.279452	0.255144	0.183813	0.1893	0.00274	0.228767	0.482192	0.715068	0.99589	0.00411	0.319178	0.636986	0.857534	0.99863	0.00137	0.216438	0.4	0.587671	1	0.49589	0.050685	0.453425	0.032922	0.093278	0.002743	0.00137	0.445205	0.683562	0.871233	1	0.009589	0.646575	0.676712	0.741096	0.889041	0.020548	0.191781	0.334247	0.478082	0.856164	0.491781	0.386831	0.005479	0.224658	0.471233	0.79589	0.99726	0.442466
0.383721	0.302326	0.313953	0.235294	0.235294	0.211765	0.023256	0.255814	0.430233	0.709302	0.953488	0.034884	0.186047	0.569767	0.72093	0.976744	0.011628	0.197674	0.453488	0.755814	1	0.383721	0.290698	0.325581	0.094118	0.070588	0	0.011628	0.139535	0.55814	0.825581	1	0.081395	0.302326	0.604651	0.674419	0.813953	0.162791	0.232558	0.453488	0.534884	0.94186	0.406977	0.494118	0.046512	0.151163	0.395349	0.651163	0.965116	0.325581
0.473896	0.228916	0.297189	0.205645	0.290323	0.133065	0.016064	0.24498	0.48996	0.751004	1	0.036145	0.240964	0.554217	0.767068	0.97992	0.004016	0.220884	0.433735	0.698795	0.987952	0.48996	0.236948	0.273092	0.092742	0.068548	0.004032	0.004016	0.168675	0.522088	0.751004	1	0.076305	0.273092	0.441767	0.702811	0.915663	0.008032	0.349398	0.48996	0.803213	0.951807	0.341365	0.33871	0.008032	0.248996	0.570281	0.759036	0.987952	0.261044
0.47166	0.42915	0.09919	0.509128	0.103448	0.048682	0.006073	0.287449	0.550607	0.755061	0.997976	0.004049	0.279352	0.520243	0.787449	1	0.002024	0.078947	0.216599	0.309717	0.919028	0.789474	0.115385	0.095142	0.044625	0.024341	0	0.002024	0.38664	0.58502	0.793522	1	0.006073	0.078947	0.214575	0.291498	0.62753	0.030364	0.091093	0.240891	0.311741	0.84413	0.157895	0.154158	0.008097	0.080972	0.216599	0.275304	0.821862	0.431174
0.37395	0.380952	0.245098	0.304348	0.165498	0.178121	0.007003	0.271709	0.528011	0.80112	1	0.002801	0.256303	0.522409	0.780112	0.997199	0.001401	0.208683	0.418768	0.64986	0.957983	0.509804	0.121849	0.368347	0.040673	0.057504	0.007013	0.001401	0.292717	0.670868	0.872549	1	0.060224	0.264706	0.414566	0.539216	0.642857	0.004202	0.190476	0.406162	0.64986	0.757703	0.487395	0.350631	0.004202	0.229692	0.441176	0.654062	0.990196	0.389356
0.262664	0.476548	0.260788	0.214286	0.148496	0.236842	0.030019	0.249531	0.439024	0.727955	1	0.007505	0.26454	0.534709	0.78424	0.998124	0.001876	0.213884	0.500938	0.724203	0.994371	0.686679	0.166979	0.146341	0.067669	0.037594	0.003759	0.001876	0.275797	0.553471	0.804878	1	0.015009	0.238274	0.377111	0.690432	0.981238	0.016886	0.195122	0.341463	0.716698	0.834897	0.484053	0.368421	0.009381	0.358349	0.641651	0.827392	0.994371	0.45591
0.301552	0.394678	0.303769	0.242222	0.177778	0.233333	0.004435	0.226164	0.518847	0.807095	1	0.006652	0.261641	0.505543	0.740576	0.993348	0.002217	0.24612	0.474501	0.696231	0.980044	0.463415	0.121951	0.414634	0.044444	0.084444	0.004444	0.002217	0.223947	0.487805	0.804878	1	0.011086	0.093126	0.40133	0.844789	0.946785	0.108647	0.332594	0.527716	0.698448	0.984479	0.569845	0.346667	0.013304	0.312639	0.523282	0.711752	0.988914	0.392461
0.302521	0.436975	0.260504	0.254237	0.161017	0.20339	0.042017	0.184874	0.554622	0.865546	1	0.02521	0.268908	0.428571	0.722689	0.932773	0.008403	0.252101	0.487395	0.689076	0.966387	0.436975	0.151261	0.411765	0.050847	0.084746	0	0.008403	0.193277	0.352941	0.714286	1	0.243697	0.268908	0.436975	0.731092	0.773109	0.033613	0.487395	0.596639	0.857143	0.966387	0.453782	0.355932	0.067227	0.394958	0.537815	0.739496	0.966387	0.411765
0.387234	0.306383	0.306383	0.260684	0.269231	0.153846	0.012766	0.26383	0.519149	0.748936	0.982979	0.008511	0.246809	0.382979	0.723404	1	0.004255	0.174468	0.53617	0.761702	0.991489	0.540426	0.148936	0.310638	0.094017	0.068376	0	0.004255	0.259574	0.404255	0.73617	1	0.012766	0.06383	0.531915	0.757447	0.987234	0.089362	0.187234	0.578723	0.795745	0.957447	0.519149	0.358974	0.017021	0.319149	0.502128	0.753191	0.991489	0.32766
0.464103	0.310256	0.225641	0.275064	0.195373	0.151671	0.007692	0.292308	0.551282	0.771795	1	0.005128	0.212821	0.441026	0.725641	0.997436	0.002564	0.238462	0.45641	0.717949	0.946154	0.497436	0.158974	0.34359	0.071979	0.061697	0	0.002564	0.202564	0.446154	0.764103	1	0.007692	0.323077	0.5	0.689744	0.866667	0.048718	0.248718	0.584615	0.728205	0.928205	0.346154	0.359897	0.010256	0.238462	0.464103	0.725641	0.992308	0.317949
0.378641	0.349515	0.271845	0.239024	0.2	0.214634	0.019417	0.203883	0.42233	0.713592	0.995146	0.009709	0.23301	0.519417	0.776699	1	0.004854	0.34466	0.567961	0.747573	0.966019	0.466019	0.169903	0.364078	0.073171	0.073171	0.034146	0.004854	0.150485	0.509709	0.703883	1	0.048544	0.247573	0.592233	0.699029	0.980583	0.033981	0.354369	0.461165	0.757282	0.946602	0.461165	0.419512	0.014563	0.349515	0.509709	0.728155	0.980583	0.339806
0.441441	0.297297	0.261261	0.290909	0.163636	0.127273	0.018018	0.288288	0.486486	0.747748	0.981982	0.063063	0.261261	0.495495	0.675676	0.990991	0.009009	0.207207	0.351351	0.684685	1	0.45045	0.54955	0	0.181818	0	0	0.009009	0.18018	0.477477	0.711712	1	0.036036	0.243243	0.567568	0.792793	0.990991	0	0	0	0	0	0.441441	0.290909	0.036036	0.243243	0.54955	0.675676	0.936937	0.315315
0.37051	0.321361	0.308129	0.210227	0.263258	0.193182	0.005671	0.272212	0.533081	0.754253	0.996219	0.003781	0.258979	0.489603	0.727788	1	0.00189	0.20794	0.47259	0.746692	0.99811	0.451796	0.177694	0.37051	0.087121	0.081439	0.001894	0.00189	0.336484	0.534972	0.786389	0.994329	0.069943	0.440454	0.759924	0.858223	1	0.013233	0.181474	0.325142	0.565217	0.931947	0.531191	0.390152	0.009452	0.221172	0.406427	0.708885	0.99811	0.342155
0.353659	0.292683	0.353659	0.197531	0.246914	0.222222	0.060976	0.256098	0.414634	0.621951	0.95122	0.02439	0.158537	0.634146	0.841463	0.97561	0.012195	0.195122	0.439024	0.682927	1	0.378049	0.292683	0.329268	0.098765	0.074074	0	0.012195	0.121951	0.54878	0.829268	1	0.036585	0.280488	0.597561	0.731707	0.804878	0.134146	0.195122	0.426829	0.512195	0.939024	0.426829	0.493827	0.036585	0.170732	0.463415	0.646341	0.963415	0.292683
0.36534	0.393443	0.241218	0.248535	0.173505	0.203986	0.004684	0.277518	0.514052	0.74356	0.998829	0.002342	0.208431	0.429742	0.713115	0.991803	0.001171	0.272834	0.537471	0.797424	1	0.586651	0.118267	0.295082	0.059789	0.071512	0.008206	0.001171	0.201405	0.409836	0.668618	1	0.016393	0.144028	0.377049	0.567916	0.980094	0.070258	0.482436	0.741218	0.855972	0.996487	0.352459	0.361079	0.016393	0.192037	0.47541	0.795082	0.994145	0.400468
0.357441	0.336579	0.305981	0.207521	0.228412	0.221448	0.004172	0.250348	0.553547	0.84701	1	0.002782	0.264256	0.45758	0.698192	0.997218	0.001391	0.226704	0.49096	0.724618	0.993046	0.485396	0.32267	0.191933	0.125348	0.033426	0.005571	0.001391	0.216968	0.433936	0.67733	1	0.005563	0.357441	0.543811	0.685675	0.988873	0.009736	0.166898	0.860918	0.909597	0.995828	0.50765	0.401114	0.006954	0.268428	0.488178	0.724618	0.990264	0.360223
0.446809	0.333333	0.219858	0.307143	0.157143	0.164286	0.014184	0.184397	0.475177	0.758865	1	0.021277	0.319149	0.588652	0.801418	0.992908	0.007092	0.134752	0.404255	0.659574	0.978723	0.48227	0.134752	0.382979	0.042857	0.1	0	0.007092	0.269504	0.439716	0.851064	1	0.205674	0.22695	0.375887	0.411348	0.680851	0.028369	0.134752	0.539007	0.765957	0.879433	0.404255	0.285714	0.06383	0.361702	0.489362	0.666667	0.964539	0.347518
0.502222	0.297778	0.2	0.245536	0.205357	0.111607	0.017778	0.182222	0.444444	0.733333	1	0.008889	0.271111	0.502222	0.866667	0.982222	0.004444	0.364444	0.528889	0.684444	0.995556	0.471111	0.102222	0.426667	0.035714	0.089286	0	0.004444	0.222222	0.373333	0.622222	1	0.342222	0.36	0.506667	0.657778	0.684444	0.017778	0.151111	0.635556	0.808889	0.991111	0.266667	0.267857	0.04	0.4	0.528889	0.742222	0.982222	0.351111
0.346977	0.382326	0.270698	0.250466	0.17784	0.216015	0.00186	0.28093	0.538605	0.823256	0.996279	0.006512	0.185116	0.426977	0.72093	1	0.00093	0.300465	0.537674	0.705116	0.992558	0.619535	0.073488	0.306977	0.040037	0.062384	0.004655	0.00093	0.204651	0.421395	0.817674	1	0.021395	0.091163	0.274419	0.84186	0.996279	0.004651	0.490233	0.59814	0.707907	0.873488	0.555349	0.396648	0.006512	0.335814	0.541395	0.76	0.99814	0.382326
0.356265	0.298526	0.345209	0.204182	0.254613	0.236162	0.002457	0.283784	0.540541	0.760442	1	0.004914	0.237101	0.455774	0.732187	0.995086	0.001229	0.22973	0.495086	0.735872	0.997543	0.465602	0.248157	0.286241	0.098401	0.059041	0.00246	0.001229	0.210074	0.469287	0.749386	1	0.038084	0.202703	0.423833	0.793612	0.997543	0.006143	0.318182	0.556511	0.707617	0.9914	0.563882	0.398524	0.003686	0.271499	0.484029	0.743243	0.997543	0.332924
0.430446	0.301837	0.267717	0.234211	0.2	0.192105	0.018373	0.278215	0.593176	0.800525	1	0.005249	0.186352	0.469816	0.71916	0.976378	0.002625	0.265092	0.451444	0.627297	0.971129	0.430446	0.094488	0.475066	0.044737	0.102632	0.002632	0.002625	0.115486	0.39895	0.700787	1	0.086614	0.24147	0.372703	0.48294	0.687664	0.12336	0.354331	0.587927	0.800525	0.992126	0.362205	0.342105	0.089239	0.270341	0.427822	0.56168	0.971129	0.32021
0.378788	0.363636	0.257576	0.384615	0.215385	0.138462	0.045455	0.19697	0.484848	0.666667	1	0.030303	0.272727	0.469697	0.681818	0.984848	0.015152	0.212121	0.378788	0.757576	0.939394	0.515152	0.212121	0.272727	0.076923	0.076923	0.015385	0.015152	0.272727	0.5	0.666667	1	0.19697	0.227273	0.348485	0.393939	0.772727	0.106061	0.151515	0.621212	0.848485	0.924242	0.318182	0.369231	0.136364	0.257576	0.378788	0.757576	0.939394	0.348485
0.33	0.31	0.36	0.262626	0.252525	0.222222	0.07	0.26	0.55	0.81	1	0.03	0.17	0.38	0.71	0.98	0.01	0.27	0.49	0.7	0.97	0.4	0.34	0.26	0.090909	0.050505	0.010101	0.01	0.16	0.38	0.61	1	0.09	0.41	0.54	0.68	0.96	0.19	0.24	0.73	0.79	0.89	0.46	0.464646	0.04	0.19	0.53	0.71	0.95	0.32
0.33123	0.353312	0.315457	0.259494	0.177215	0.246835	0.012618	0.271293	0.520505	0.772871	0.990536	0.006309	0.176656	0.44795	0.694006	0.996845	0.003155	0.287066	0.514196	0.744479	1	0.403785	0.22082	0.375394	0.063291	0.063291	0	0.003155	0.157729	0.40694	0.637224	1	0.059937	0.208202	0.425868	0.782334	0.949527	0.097792	0.369085	0.574132	0.829653	0.987382	0.542587	0.316456	0.056782	0.239748	0.492114	0.722397	0.993691	0.394322
0.289662	0.450358	0.25998	0.242828	0.148566	0.240779	0.004094	0.185261	0.455476	0.763562	0.998976	0.002047	0.27738	0.524053	0.74002	0.997953	0.001024	0.254862	0.451382	0.743091	1	0.576254	0.107472	0.316274	0.04918	0.071721	0.004098	0.001024	0.323439	0.576254	0.787103	1	0.037871	0.174002	0.30911	0.433982	0.995906	0.047083	0.209826	0.418628	0.735926	0.993859	0.426817	0.432377	0.012282	0.283521	0.510747	0.77175	0.995906	0.456499
0.297483	0.359268	0.343249	0.194954	0.197248	0.21789	0.016018	0.299771	0.540046	0.782609	1	0.004577	0.19222	0.448513	0.709382	0.988558	0.002288	0.258581	0.501144	0.759725	0.997712	0.432494	0.162471	0.405034	0.052752	0.084862	0.002294	0.002288	0.203661	0.405034	0.684211	1	0.128146	0.356979	0.533181	0.87643	0.997712	0.01373	0.221968	0.560641	0.791762	0.965675	0.569794	0.302752	0.016018	0.263158	0.466819	0.732265	0.995423	0.372998
0.389474	0.315789	0.294737	0.253968	0.232804	0.190476	0.015789	0.231579	0.5	0.715789	0.994737	0.010526	0.252632	0.468421	0.752632	0.973684	0.005263	0.247368	0.531579	0.736842	1	0.452632	0.163158	0.384211	0.074074	0.084656	0	0.005263	0.321053	0.484211	0.689474	1	0.015789	0.305263	0.715789	0.8	0.994737	0.047368	0.173684	0.415789	0.668421	0.963158	0.447368	0.455026	0.021053	0.242105	0.494737	0.678947	0.989474	0.415789
0.263369	0.495989	0.240642	0.261044	0.116466	0.239625	0.005348	0.160428	0.391711	0.691176	0.997326	0.002674	0.316845	0.576203	0.798128	0.990642	0.001337	0.216578	0.434492	0.681818	1	0.683155	0.112299	0.204545	0.053548	0.066934	0	0.001337	0.346257	0.614973	0.796791	1	0.006684	0.132353	0.229947	0.335561	0.969251	0.032086	0.201872	0.377005	0.506684	0.995989	0.475936	0.364123	0.006684	0.300802	0.510695	0.762032	0.991979	0.486631
0.236667	0.413333	0.35	0.200669	0.200669	0.277592	0.02	0.22	0.396667	0.76	0.996667	0.006667	0.243333	0.566667	0.763333	1	0.003333	0.256667	0.496667	0.686667	0.993333	0.613333	0.146667	0.24	0.053512	0.060201	0	0.003333	0.336667	0.646667	0.813333	1	0.023333	0.083333	0.133333	0.356667	0.993333	0.203333	0.31	0.496667	0.556667	0.93	0.51	0.421405	0.013333	0.21	0.436667	0.663333	0.993333	0.42
0.302059	0.411899	0.286041	0.254587	0.176606	0.229358	0.011442	0.276888	0.530892	0.771167	0.995423	0.006865	0.244851	0.496568	0.727689	1	0.002288	0.221968	0.471396	0.741419	0.993135	0.386728	0.128146	0.485126	0.055046	0.082569	0	0.002288	0.361556	0.560641	0.773455	1	0.402746	0.576659	0.695652	0.8627	0.995423	0.02746	0.16476	0.336384	0.643021	0.90389	0.601831	0.334862	0.006865	0.240275	0.505721	0.729977	0.990847	0.475973
0.344828	0.387931	0.267241	0.252174	0.208696	0.2	0.025862	0.301724	0.474138	0.784483	1	0.017241	0.189655	0.448276	0.715517	0.956897	0.008621	0.232759	0.525862	0.706897	0.991379	0.310345	0.232759	0.456897	0.069565	0.086957	0.017391	0.008621	0.215517	0.577586	0.715517	1	0.362069	0.508621	0.568966	0.706897	0.982759	0.051724	0.155172	0.301724	0.741379	0.905172	0.405172	0.504348	0.043103	0.267241	0.517241	0.715517	0.991379	0.413793
0.377203	0.359577	0.26322	0.289412	0.196471	0.188235	0.003525	0.303173	0.589894	0.804935	1	0.00235	0.19624	0.473561	0.772033	0.998825	0.001175	0.245593	0.427732	0.626322	0.992949	0.475911	0.115159	0.408931	0.048235	0.092941	0.005882	0.001175	0.26322	0.59577	0.835488	1	0.042303	0.229142	0.346651	0.459459	0.811986	0.024677	0.251469	0.502938	0.668625	0.943596	0.413631	0.329412	0.0047	0.20564	0.379553	0.596945	0.992949	0.374853
0.337004	0.328194	0.334802	0.205298	0.249448	0.161148	0.004405	0.222467	0.484581	0.753304	0.995595	0.011013	0.242291	0.486784	0.735683	0.977974	0.002203	0.277533	0.513216	0.757709	1	0.400881	0.185022	0.414097	0.066225	0.083885	0.004415	0.002203	0.26652	0.497797	0.746696	1	0.11674	0.273128	0.647577	0.770925	0.955947	0.017621	0.209251	0.451542	0.702643	0.997797	0.544053	0.401766	0.015419	0.277533	0.480176	0.711454	0.991189	0.348018
0.348092	0.367939	0.283969	0.266055	0.201835	0.203364	0.010687	0.276336	0.534351	0.778626	0.998473	0.006107	0.236641	0.50687	0.758779	1	0.001527	0.225954	0.453435	0.690076	0.983206	0.471756	0.120611	0.407634	0.042813	0.076453	0.006116	0.001527	0.233588	0.561832	0.871756	1	0.076336	0.305344	0.468702	0.601527	0.719084	0.00458	0.225954	0.459542	0.734351	0.885496	0.479389	0.318043	0.003053	0.267176	0.468702	0.677863	0.972519	0.39542
0.249012	0.442688	0.3083	0.206349	0.162698	0.261905	0.031621	0.256917	0.529644	0.758893	1	0.007905	0.213439	0.478261	0.774704	0.996047	0.003953	0.26087	0.474308	0.695652	0.988142	0.418972	0.189723	0.391304	0.055556	0.087302	0	0.003953	0.217391	0.537549	0.853755	1	0.142292	0.316206	0.395257	0.608696	0.70751	0.027668	0.205534	0.490119	0.790514	0.913043	0.525692	0.373016	0.043478	0.237154	0.442688	0.624506	0.988142	0.422925
0.281421	0.442623	0.275956	0.221918	0.169863	0.271233	0.008197	0.234973	0.519126	0.70765	1	0.005464	0.215847	0.437158	0.740437	0.997268	0.002732	0.303279	0.540984	0.770492	0.989071	0.535519	0.155738	0.308743	0.049315	0.076712	0	0.002732	0.273224	0.407104	0.699454	1	0.128415	0.185792	0.527322	0.844262	0.920765	0.010929	0.248634	0.590164	0.808743	0.991803	0.387978	0.361644	0.038251	0.256831	0.622951	0.838798	0.991803	0.472678
0.30303	0.400932	0.296037	0.261682	0.186916	0.247664	0.006993	0.268065	0.515152	0.780886	0.993007	0.004662	0.205128	0.459207	0.731935	0.997669	0.002331	0.272727	0.51049	0.724942	1	0.386946	0.090909	0.522145	0.035047	0.114486	0.002336	0.002331	0.228438	0.454545	0.685315	1	0.048951	0.104895	0.181818	0.223776	0.344988	0.013986	0.389277	0.594406	0.804196	0.993007	0.599068	0.411215	0.009324	0.261072	0.477855	0.729604	0.995338	0.435897
0.40625	0.291667	0.302083	0.242105	0.157895	0.221053	0.020833	0.25	0.541667	0.770833	0.958333	0.03125	0.28125	0.447917	0.635417	0.989583	0.010417	0.208333	0.427083	0.697917	1	0.46875	0.53125	0	0.168421	0	0	0.010417	0.3125	0.53125	0.802083	1	0.020833	0.197917	0.385417	0.6875	0.979167	0	0	0	0	0	0.302083	0.4	0.03125	0.208333	0.416667	0.697917	0.96875	0.291667
0.391555	0.301344	0.307102	0.230769	0.215385	0.198077	0.003839	0.337812	0.59309	0.823417	0.998081	0.011516	0.190019	0.433781	0.68714	1	0.001919	0.209213	0.426104	0.644914	0.990403	0.428023	0.143954	0.428023	0.046154	0.088462	0.007692	0.001919	0.241843	0.602687	0.873321	1	0.090211	0.289827	0.428023	0.587332	0.681382	0.017274	0.230326	0.466411	0.740883	0.988484	0.474088	0.319231	0.011516	0.1881	0.380038	0.600768	0.934741	0.347409
0.359223	0.349515	0.291262	0.303922	0.137255	0.205882	0.048544	0.174757	0.466019	0.728155	1	0.019417	0.300971	0.485437	0.708738	0.980583	0.009709	0.223301	0.514563	0.757282	0.961165	0.601942	0.106796	0.291262	0.078431	0.078431	0	0.009709	0.165049	0.368932	0.640777	1	0.126214	0.291262	0.320388	0.427184	0.61165	0.038835	0.533981	0.757282	0.825243	0.951456	0.378641	0.372549	0.038835	0.320388	0.553398	0.805825	0.961165	0.330097
0.340102	0.345178	0.314721	0.229008	0.229008	0.223919	0.007614	0.271574	0.497462	0.763959	0.997462	0.005076	0.228426	0.472081	0.746193	0.989848	0.002538	0.243655	0.520305	0.738579	1	0.467005	0.213198	0.319797	0.083969	0.089059	0.017812	0.002538	0.238579	0.459391	0.751269	1	0.017766	0.335025	0.558376	0.738579	0.92132	0.048223	0.203046	0.525381	0.771574	0.984772	0.527919	0.437659	0.017766	0.261421	0.530457	0.741117	0.994924	0.383249
0.325472	0.377358	0.29717	0.241706	0.189573	0.2891	0.028302	0.339623	0.589623	0.759434	1	0.009434	0.193396	0.410377	0.754717	0.995283	0.004717	0.179245	0.481132	0.693396	0.966981	0.580189	0.226415	0.193396	0.085308	0.066351	0	0.004717	0.188679	0.542453	0.778302	1	0.051887	0.283019	0.367925	0.811321	0.886792	0.014151	0.240566	0.415094	0.679245	0.79717	0.448113	0.388626	0.014151	0.283019	0.617925	0.806604	0.966981	0.377358
0.38843	0.278237	0.333333	0.205517	0.314483	0.197241	0.008264	0.275482	0.548209	0.760331	1	0.004132	0.206612	0.431129	0.703857	0.99449	0.001377	0.249311	0.506887	0.758953	0.995868	0.465565	0.232782	0.301653	0.096552	0.057931	0.002759	0.001377	0.212121	0.440771	0.712121	1	0.0427	0.18595	0.42562	0.819559	0.975207	0.006887	0.348485	0.57438	0.736915	0.995868	0.578512	0.383448	0.004132	0.253444	0.49449	0.753444	0.995868	0.294766
0.320482	0.40241	0.277108	0.252111	0.190591	0.230398	0.00241	0.268675	0.53012	0.76506	1	0.004819	0.240964	0.491566	0.744578	0.993976	0.001205	0.237349	0.478313	0.745783	0.996386	0.486747	0.228916	0.284337	0.101327	0.057901	0.002413	0.001205	0.213253	0.486747	0.742169	1	0.037349	0.206024	0.409639	0.750602	0.996386	0.006024	0.327711	0.571084	0.703614	0.991566	0.553012	0.393245	0.003614	0.246988	0.468675	0.722892	0.996386	0.473494
0.310526	0.373684	0.315789	0.216931	0.195767	0.306878	0.042105	0.142105	0.426316	0.694737	0.973684	0.010526	0.242105	0.521053	0.726316	1	0.005263	0.294737	0.510526	0.773684	0.994737	0.373684	0.273684	0.352632	0.079365	0.100529	0.005291	0.005263	0.205263	0.531579	0.810526	1	0.142105	0.268421	0.357895	0.815789	0.931579	0.031579	0.110526	0.489474	0.7	0.863158	0.452632	0.42328	0.036842	0.278947	0.521053	0.763158	0.978947	0.389474
0.282927	0.409756	0.307317	0.22549	0.196078	0.269608	0.009756	0.243902	0.404878	0.643902	0.956098	0.014634	0.22439	0.570732	0.804878	1	0.004878	0.239024	0.473171	0.702439	0.917073	0.409756	0.443902	0.146341	0.127451	0.039216	0	0.004878	0.326829	0.57561	0.809756	1	0.019512	0.297561	0.468293	0.643902	0.887805	0.078049	0.107317	0.24878	0.678049	0.970732	0.429268	0.441176	0.02439	0.253659	0.463415	0.702439	0.985366	0.419512
0.355183	0.314024	0.330793	0.210687	0.232061	0.218321	0.003049	0.272866	0.551829	0.78811	0.989329	0.006098	0.190549	0.419207	0.696646	1	0.001524	0.282012	0.493902	0.731707	0.998476	0.403963	0.16311	0.432927	0.071756	0.077863	0.00458	0.001524	0.304878	0.510671	0.821646	1	0.004573	0.179878	0.394817	0.868902	0.998476	0.028963	0.26372	0.530488	0.676829	0.92378	0.544207	0.381679	0.006098	0.245427	0.449695	0.690549	0.998476	0.306402
0.402174	0.358696	0.23913	0.373626	0.186813	0.175824	0.054348	0.25	0.5	0.76087	1	0.021739	0.23913	0.521739	0.728261	0.98913	0.01087	0.141304	0.413043	0.597826	0.934783	0.315217	0.271739	0.413043	0.087912	0.10989	0.021978	0.01087	0.456522	0.673913	0.75	1	0.065217	0.130435	0.76087	0.826087	0.945652	0.032609	0.25	0.358696	0.5	0.978261	0.347826	0.43956	0.065217	0.326087	0.532609	0.695652	0.956522	0.391304
0.313589	0.397213	0.289199	0.223776	0.178322	0.244755	0.038328	0.229965	0.41115	0.783972	1	0.006969	0.292683	0.526132	0.686411	0.993031	0.003484	0.191638	0.508711	0.790941	0.989547	0.606272	0.188153	0.205575	0.083916	0.048951	0	0.003484	0.355401	0.529617	0.679443	1	0.010453	0.170732	0.313589	0.853659	0.993031	0.101045	0.146341	0.348432	0.804878	0.937282	0.439024	0.405594	0.010453	0.212544	0.522648	0.763066	0.993031	0.390244
0.465714	0.35	0.184286	0.267525	0.164521	0.127325	0.002857	0.212857	0.492857	0.775714	0.998571	0.004286	0.234286	0.401429	0.664286	0.994286	0.001429	0.458571	0.604286	0.772857	1	0.607143	0.1	0.292857	0.041488	0.038627	0.001431	0.001429	0.178571	0.335714	0.607143	1	0.134286	0.468571	0.53	0.601429	0.96	0.024286	0.561429	0.734286	0.807143	0.881429	0.438571	0.309013	0.021429	0.351429	0.54	0.771429	0.994286	0.372857
0.385925	0.360953	0.253121	0.252273	0.177273	0.184091	0.00454	0.284904	0.627696	0.819523	0.998865	0.00227	0.211124	0.473326	0.711691	0.99319	0.001135	0.250851	0.417707	0.62202	1	0.500568	0.112372	0.38706	0.045455	0.079545	0.006818	0.001135	0.160045	0.494892	0.816118	1	0.095346	0.273553	0.385925	0.497162	0.860386	0.111237	0.300795	0.54143	0.683314	0.979569	0.402951	0.320455	0.003405	0.22815	0.401816	0.587968	0.99546	0.38706
0.384793	0.428571	0.186636	0.290993	0.124711	0.180139	0.009217	0.292627	0.490783	0.741935	0.993088	0.004608	0.202765	0.421659	0.718894	0.997696	0.002304	0.336406	0.645161	0.781106	1	0.677419	0.073733	0.248848	0.039261	0.080831	0.006928	0.002304	0.25576	0.426267	0.668203	1	0.043779	0.12212	0.18894	0.576037	0.836406	0.006912	0.605991	0.709677	0.78341	0.958525	0.366359	0.332564	0.071429	0.437788	0.580645	0.732719	0.974654	0.400922
0.334604	0.52439	0.141006	0.278413	0.09077	0.138063	0.001524	0.259146	0.490854	0.719512	0.992378	0.005335	0.253811	0.502287	0.747713	0.999238	0.000762	0.176067	0.528201	0.832317	1	0.733994	0.057165	0.208841	0.023646	0.04958	0.005339	0.000762	0.253811	0.496189	0.724848	1	0.04878	0.279726	0.351372	0.640244	0.887957	0.023628	0.216463	0.532774	0.852134	0.974848	0.25	0.230359	0.022104	0.17378	0.370427	0.835366	0.997713	0.568598
0.295652	0.42029	0.284058	0.209572	0.183466	0.211748	0.002174	0.206522	0.433333	0.672464	0.994203	0.001449	0.269565	0.595652	0.868116	1	0.000725	0.268116	0.471739	0.675362	0.991304	0.534783	0.12971	0.335507	0.052937	0.06599	0.003626	0.000725	0.242754	0.555797	0.86087	1	0.015217	0.299275	0.476087	0.562319	0.985507	0.002899	0.245652	0.464493	0.657971	0.826087	0.601449	0.31037	0.002899	0.324638	0.57971	0.845652	0.998551	0.418841
0.363014	0.363014	0.273973	0.310345	0.213793	0.17931	0.020548	0.253425	0.554795	0.753425	0.993151	0.013699	0.212329	0.410959	0.719178	1	0.006849	0.267123	0.486301	0.726027	0.90411	0.527397	0.130137	0.342466	0.041379	0.096552	0	0.006849	0.143836	0.369863	0.671233	1	0.260274	0.280822	0.452055	0.712329	0.746575	0.10274	0.513699	0.616438	0.815068	0.917808	0.39726	0.275862	0.068493	0.273973	0.554795	0.712329	0.924658	0.424658
0.410909	0.381818	0.207273	0.29927	0.211679	0.149635	0.014545	0.250909	0.48	0.72	0.981818	0.007273	0.192727	0.436364	0.723636	1	0.003636	0.363636	0.607273	0.781818	0.996364	0.727273	0.036364	0.236364	0.021898	0.072993	0	0.003636	0.181818	0.432727	0.767273	1	0.807273	0.810909	0.872727	0.898182	0.909091	0.250909	0.356364	0.523636	0.661818	0.978182	0.243636	0.357664	0.010909	0.276364	0.549091	0.778182	0.985455	0.432727
0.455172	0.282759	0.262069	0.236111	0.243056	0.194444	0.02069	0.296552	0.641379	0.834483	1	0.013793	0.241379	0.4	0.593103	0.924138	0.006897	0.172414	0.386207	0.586207	0.965517	0.475862	0.282759	0.241379	0.097222	0.083333	0	0.006897	0.241379	0.510345	0.751724	1	0.144828	0.227586	0.365517	0.434483	0.772414	0.075862	0.606897	0.668966	0.889655	0.972414	0.317241	0.375	0.034483	0.227586	0.386207	0.551724	0.965517	0.296552
0.284133	0.398524	0.317343	0.203704	0.207407	0.248148	0.055351	0.383764	0.549815	0.789668	1	0.00738	0.199262	0.464945	0.734317	0.99262	0.00369	0.206642	0.453875	0.730627	0.98893	0.608856	0.321033	0.070111	0.1	0.040741	0.003704	0.00369	0.232472	0.542435	0.763838	1	0.01107	0.284133	0.494465	0.664207	0.95572	0.04059	0.051661	0.132841	0.457565	0.575646	0.538745	0.288889	0.01107	0.254613	0.542435	0.752768	0.9631	0.394834
0.338028	0.352113	0.309859	0.240566	0.25	0.245283	0.023474	0.258216	0.488263	0.807512	0.985915	0.014085	0.267606	0.507042	0.760563	1	0.004695	0.192488	0.469484	0.694836	0.995305	0.464789	0.375587	0.159624	0.160377	0.018868	0	0.004695	0.169014	0.422535	0.802817	1	0.065728	0.248826	0.389671	0.694836	0.971831	0.441315	0.474178	0.516432	0.821596	0.86385	0.474178	0.490566	0.018779	0.183099	0.492958	0.666667	0.957746	0.361502
0.416404	0.343849	0.239748	0.262658	0.158228	0.199367	0.028391	0.277603	0.536278	0.760252	1	0.006309	0.201893	0.460568	0.769716	0.993691	0.003155	0.246057	0.44164	0.665615	0.921136	0.637224	0.135647	0.227129	0.056962	0.063291	0	0.003155	0.176656	0.495268	0.77918	1	0.15142	0.242902	0.353312	0.85489	0.940063	0.072555	0.328076	0.523659	0.624606	0.842271	0.274448	0.322785	0.044164	0.249211	0.378549	0.599369	0.917981	0.353312
0.41339	0.331562	0.255048	0.253191	0.21383	0.161702	0.002125	0.255048	0.518597	0.760893	1	0.003188	0.217853	0.520723	0.749203	0.98831	0.001063	0.274176	0.463337	0.662062	0.997875	0.472901	0.077577	0.449522	0.034043	0.085106	0.008511	0.001063	0.157279	0.642933	0.77577	1	0.035069	0.223167	0.409139	0.81509	0.954304	0.003188	0.277365	0.461211	0.603613	0.996812	0.416578	0.33617	0.007439	0.274176	0.463337	0.636557	0.996812	0.35813
0.448485	0.369697	0.181818	0.317073	0.189024	0.121951	0.024242	0.242424	0.509091	0.775758	1	0.012121	0.163636	0.381818	0.727273	0.981818	0.006061	0.406061	0.557576	0.69697	0.884848	0.575758	0.151515	0.272727	0.054878	0.054878	0.030488	0.006061	0.139394	0.30303	0.624242	1	0.242424	0.4	0.606061	0.666667	0.860606	0.406061	0.466667	0.775758	0.866667	0.939394	0.436364	0.390244	0.078788	0.278788	0.466667	0.69697	0.933333	0.430303
0.325109	0.362845	0.312046	0.231105	0.229651	0.204942	0.002903	0.267054	0.489115	0.751814	1	0.005806	0.223512	0.49492	0.748911	0.998549	0.001451	0.236575	0.503628	0.740203	0.991292	0.442671	0.149492	0.407837	0.050872	0.088663	0.001453	0.001451	0.245283	0.552975	0.764877	1	0.044993	0.153846	0.413643	0.773585	0.994194	0.013062	0.313498	0.49492	0.711176	0.984035	0.496372	0.360465	0.01016	0.236575	0.526851	0.734398	0.995646	0.384615
0.352448	0.334266	0.313287	0.22549	0.232493	0.214286	0.002797	0.278322	0.535664	0.777622	1	0.004196	0.205594	0.448951	0.696503	0.994406	0.001399	0.272727	0.527273	0.759441	0.998601	0.373427	0.19021	0.436364	0.095238	0.072829	0.005602	0.001399	0.254545	0.507692	0.8	1	0.012587	0.193007	0.441958	0.881119	0.998601	0.034965	0.286713	0.531469	0.683916	0.93007	0.525874	0.386555	0.013986	0.26993	0.48951	0.724476	0.998601	0.352448
0.37247	0.303644	0.323887	0.22027	0.240541	0.214865	0.004049	0.288799	0.54386	0.784076	1	0.005398	0.194332	0.450742	0.721997	0.995951	0.00135	0.245614	0.48583	0.735493	0.99865	0.411606	0.167341	0.421053	0.07973	0.078378	0.002703	0.00135	0.306343	0.489879	0.804318	0.99865	0.004049	0.17004	0.34278	0.900135	1	0.025641	0.268556	0.541161	0.678812	0.932524	0.51552	0.378378	0.005398	0.249663	0.466937	0.680162	0.99865	0.300945
0.416667	0.25	0.333333	0.259542	0.274809	0.145038	0.037879	0.234848	0.469697	0.787879	0.984848	0.015152	0.181818	0.477273	0.674242	1	0.007576	0.325758	0.507576	0.734848	0.977273	0.507576	0.492424	0	0.167939	0	0	0.007576	0.265152	0.484848	0.719697	1	0.030303	0.204545	0.545455	0.742424	0.977273	0	0	0	0	0	0.393939	0.290076	0.045455	0.227273	0.545455	0.659091	0.977273	0.265152
0.351464	0.341004	0.307531	0.232704	0.220126	0.21174	0.004184	0.215481	0.435146	0.682008	0.997908	0.006276	0.257322	0.556485	0.801255	0.98954	0.002092	0.251046	0.502092	0.746862	1	0.493724	0.186192	0.320084	0.073375	0.077568	0.010482	0.002092	0.221757	0.506276	0.748954	1	0.008368	0.083682	0.405858	0.809623	0.939331	0.09205	0.380753	0.514644	0.723849	0.993724	0.502092	0.368973	0.006276	0.33682	0.518828	0.769874	0.979079	0.32636
0.311881	0.387789	0.30033	0.22314	0.190083	0.271074	0.006601	0.221122	0.457096	0.712871	0.9967	0.0033	0.262376	0.4967	0.762376	1	0.00165	0.242574	0.536304	0.764026	0.99835	0.528053	0.20132	0.270627	0.072727	0.056198	0.003306	0.00165	0.277228	0.468647	0.712871	1	0.087459	0.227723	0.59736	0.744224	0.99505	0.013201	0.193069	0.544554	0.80363	0.963696	0.539604	0.37686	0.009901	0.249175	0.531353	0.767327	0.99505	0.419142
0.362934	0.378378	0.258687	0.290698	0.197674	0.158915	0.007722	0.23166	0.517375	0.76834	0.980695	0.011583	0.181467	0.382239	0.710425	0.996139	0.003861	0.355212	0.606178	0.752896	1	0.571429	0.196911	0.23166	0.046512	0.069767	0.015504	0.003861	0.146718	0.305019	0.633205	1	0.316602	0.401544	0.532819	0.756757	0.996139	0.023166	0.459459	0.671815	0.837838	0.942085	0.42471	0.317829	0.019305	0.3861	0.563707	0.737452	0.992278	0.409266
0.358242	0.432967	0.208791	0.248899	0.167401	0.143172	0.006593	0.224176	0.437363	0.672527	1	0.004396	0.27033	0.586813	0.815385	0.997802	0.002198	0.276923	0.483516	0.643956	0.995604	0.657143	0.063736	0.279121	0.030837	0.044053	0.004405	0.002198	0.210989	0.586813	0.784615	1	0.068132	0.32967	0.364835	0.417582	0.643956	0.101099	0.259341	0.501099	0.718681	0.947253	0.4	0.352423	0.017582	0.274725	0.483516	0.694505	0.971429	0.452747
0.376068	0.299145	0.324786	0.258621	0.25	0.189655	0.034188	0.230769	0.512821	0.777778	1	0.017094	0.222222	0.487179	0.65812	0.982906	0.008547	0.239316	0.461538	0.760684	0.965812	0.478632	0.435897	0.08547	0.094828	0.025862	0.008621	0.008547	0.162393	0.512821	0.717949	1	0.034188	0.299145	0.452991	0.606838	0.897436	0.119658	0.128205	0.91453	0.931624	0.957265	0.401709	0.586207	0.025641	0.25641	0.42735	0.726496	0.940171	0.316239
0.338677	0.478958	0.182365	0.261044	0.126506	0.160643	0.014028	0.250501	0.533066	0.767535	1	0.006012	0.298597	0.507014	0.751503	0.993988	0.002004	0.182365	0.388778	0.673347	0.985972	0.795591	0.06012	0.144289	0.024096	0.052209	0	0.002004	0.304609	0.503006	0.769539	1	0.136273	0.188377	0.222445	0.272545	0.663327	0.160321	0.250501	0.58517	0.733467	0.985972	0.478958	0.305221	0.016032	0.336673	0.462926	0.699399	0.98998	0.41483
0.390244	0.280488	0.329268	0.17284	0.308642	0.197531	0.02439	0.280488	0.597561	0.792683	1	0.073171	0.170732	0.329268	0.560976	0.902439	0.012195	0.256098	0.47561	0.731707	0.963415	0.634146	0.268293	0.097561	0.123457	0.024691	0	0.012195	0.231707	0.52439	0.841463	1	0.134146	0.182927	0.304878	0.426829	0.621951	0.682927	0.695122	0.719512	0.743902	0.768293	0.353659	0.395062	0.060976	0.268293	0.45122	0.54878	0.804878	0.304878
0.386905	0.321429	0.291667	0.251497	0.215569	0.215569	0.029762	0.255952	0.434524	0.630952	0.964286	0.011905	0.303571	0.577381	0.779762	0.982143	0.005952	0.190476	0.47619	0.77381	1	0.434524	0.339286	0.22619	0.149701	0.053892	0.005988	0.005952	0.386905	0.52381	0.708333	1	0.142857	0.321429	0.565476	0.833333	0.994048	0.029762	0.077381	0.202381	0.64881	0.934524	0.505952	0.371257	0.029762	0.238095	0.571429	0.791667	0.994048	0.309524
0.36612	0.273224	0.360656	0.192308	0.296703	0.192308	0.016393	0.256831	0.47541	0.759563	1	0.027322	0.169399	0.437158	0.639344	0.934426	0.005464	0.31694	0.562842	0.781421	0.994536	0.420765	0.42623	0.153005	0.137363	0.049451	0.005495	0.005464	0.213115	0.540984	0.814208	1	0.027322	0.344262	0.508197	0.710383	0.994536	0.103825	0.136612	0.289617	0.644809	0.879781	0.448087	0.494505	0.032787	0.278689	0.502732	0.748634	0.994536	0.311475
0.400947	0.318863	0.280189	0.237757	0.21485	0.195103	0.003946	0.201263	0.434886	0.710339	1	0.001579	0.273875	0.513812	0.737964	0.995264	0.000789	0.325967	0.575375	0.796369	0.993686	0.416732	0.1397	0.443567	0.047393	0.082148	0.00158	0.000789	0.265193	0.51618	0.766377	1	0.32281	0.468035	0.604578	0.895817	0.993686	0.003157	0.187845	0.410418	0.722968	0.973954	0.453039	0.322275	0.003157	0.384373	0.588792	0.793212	0.993686	0.343331
0.32153	0.40085	0.27762	0.239716	0.191489	0.204255	0.002833	0.276204	0.525496	0.774788	0.997167	0.004249	0.216714	0.432011	0.720963	1	0.001416	0.273371	0.542493	0.752125	0.990085	0.562323	0.101983	0.335694	0.036879	0.087943	0.002837	0.001416	0.314448	0.502833	0.800283	1	0.157224	0.345609	0.750708	0.827195	0.917847	0.016997	0.194051	0.466006	0.651558	0.947592	0.477337	0.371631	0.016997	0.280453	0.5	0.752125	0.990085	0.439093
0.359459	0.348649	0.291892	0.265583	0.216802	0.197832	0.005405	0.22973	0.464865	0.762162	0.997297	0.010811	0.218919	0.481081	0.710811	1	0.002703	0.3	0.543243	0.735135	0.994595	0.483784	0.156757	0.359459	0.056911	0.067751	0.00813	0.002703	0.227027	0.540541	0.775676	1	0.235135	0.386486	0.543243	0.683784	0.994595	0.091892	0.2	0.427027	0.751351	0.918919	0.502703	0.325203	0.054054	0.291892	0.5	0.713514	0.994595	0.383784
0.331226	0.384324	0.28445	0.264557	0.212658	0.218987	0.003793	0.235145	0.505689	0.764855	1	0.002528	0.216182	0.48799	0.740834	0.994943	0.001264	0.298357	0.506953	0.735777	0.997472	0.381795	0.109987	0.508217	0.035443	0.108861	0.002532	0.001264	0.283186	0.572693	0.816688	1	0.255373	0.453856	0.556258	0.879899	0.93426	0.020228	0.193426	0.402023	0.661188	0.997472	0.472819	0.417722	0.013906	0.288243	0.504425	0.709229	0.997472	0.4311
0.392381	0.361905	0.245714	0.257634	0.179389	0.177481	0.005714	0.238095	0.451429	0.729524	1	0.00381	0.31619	0.506667	0.75619	0.994286	0.001905	0.167619	0.539048	0.752381	0.998095	0.700952	0.049524	0.249524	0.032443	0.051527	0.001908	0.001905	0.375238	0.579048	0.801905	1	0.344762	0.36	0.647619	0.857143	0.965714	0.005714	0.07619	0.150476	0.228571	0.96	0.348571	0.412214	0.011429	0.173333	0.499048	0.75619	0.980952	0.4
0.385768	0.35206	0.262172	0.263158	0.210526	0.229323	0.007491	0.220974	0.434457	0.737828	0.996255	0.011236	0.333333	0.610487	0.812734	1	0.003745	0.179775	0.40824	0.64794	0.985019	0.303371	0.265918	0.430712	0.075188	0.067669	0.007519	0.003745	0.134831	0.531835	0.76779	1	0.044944	0.138577	0.28839	0.794007	0.985019	0.161049	0.385768	0.509363	0.726592	0.93633	0.464419	0.473684	0.022472	0.2397	0.505618	0.722846	0.985019	0.430712
0.28022	0.406593	0.313187	0.21547	0.198895	0.270718	0.06044	0.247253	0.5	0.791209	1	0.010989	0.258242	0.538462	0.703297	0.967033	0.005495	0.164835	0.428571	0.774725	0.994505	0.554945	0.417582	0.027473	0.127072	0.005525	0.005525	0.005495	0.357143	0.604396	0.741758	1	0.027473	0.17033	0.340659	0.824176	0.994505	0.428571	0.428571	0.434066	0.43956	0.450549	0.576923	0.364641	0.016484	0.21978	0.527473	0.747253	0.994505	0.368132
0.3	0.404545	0.295455	0.205479	0.191781	0.260274	0.013636	0.236364	0.518182	0.763636	1	0.009091	0.254545	0.540909	0.818182	0.995455	0.004545	0.240909	0.427273	0.613636	0.918182	0.436364	0.372727	0.190909	0.127854	0.063927	0.009132	0.004545	0.313636	0.590909	0.8	1	0.018182	0.209091	0.427273	0.604545	0.840909	0.077273	0.213636	0.540909	0.881818	0.990909	0.413636	0.429224	0.022727	0.240909	0.431818	0.65	0.909091	0.422727
0.333333	0.347222	0.319444	0.230769	0.195804	0.244755	0.048611	0.3125	0.541667	0.770833	1	0.013889	0.215278	0.5	0.673611	0.979167	0.006944	0.173611	0.479167	0.701389	0.909722	0.604167	0.277778	0.118056	0.125874	0.041958	0	0.006944	0.173611	0.513889	0.8125	1	0.236111	0.319444	0.486111	0.638889	0.909722	0.0625	0.083333	0.201389	0.75	0.784722	0.416667	0.363636	0.034722	0.194444	0.423611	0.645833	0.923611	0.354167
0.33617	0.370213	0.293617	0.252137	0.217949	0.226496	0.008511	0.204255	0.493617	0.73617	0.961702	0.034043	0.302128	0.519149	0.761702	0.995745	0.004255	0.208511	0.459574	0.719149	1	0.459574	0.323404	0.217021	0.141026	0.055556	0.004274	0.004255	0.255319	0.480851	0.723404	1	0.114894	0.268085	0.468085	0.740426	0.940426	0.008511	0.076596	0.510638	0.795745	0.978723	0.485106	0.418803	0.012766	0.297872	0.489362	0.744681	0.978723	0.387234
0.290554	0.455852	0.253593	0.244604	0.14594	0.220966	0.002053	0.285421	0.514374	0.782341	0.997947	0.007187	0.198152	0.497947	0.762834	1	0.001027	0.287474	0.478439	0.701232	0.998973	0.559548	0.101643	0.338809	0.040082	0.068859	0.007194	0.001027	0.143737	0.428131	0.688912	1	0.00924	0.337782	0.467146	0.663244	0.932238	0.207392	0.396304	0.63963	0.799795	0.995893	0.434292	0.324769	0.007187	0.296715	0.488706	0.716632	0.99692	0.474333
0.335404	0.322981	0.341615	0.25625	0.21875	0.25	0.012422	0.26087	0.434783	0.745342	0.993789	0.049689	0.248447	0.52795	0.73913	1	0.006211	0.186335	0.484472	0.732919	0.956522	0.354037	0.304348	0.341615	0.13125	0.04375	0.00625	0.006211	0.136646	0.52795	0.732919	1	0.012422	0.229814	0.57764	0.826087	0.925466	0.15528	0.304348	0.391304	0.614907	0.981366	0.372671	0.4625	0.018634	0.192547	0.496894	0.689441	0.919255	0.31677
0.297872	0.333333	0.368794	0.185714	0.228571	0.264286	0.021277	0.255319	0.531915	0.730496	0.985816	0.014184	0.212766	0.425532	0.751773	1	0.007092	0.262411	0.510638	0.744681	0.971631	0.283688	0	0.716312	0	0.128571	0	0.007092	0.198582	0.524823	0.730496	1	0	0	0	0	0	0.06383	0.262411	0.489362	0.765957	0.978723	0.539007	0.371429	0.070922	0.35461	0.560284	0.744681	0.971631	0.382979
0.396117	0.378641	0.225243	0.287938	0.169261	0.182879	0.01165	0.314563	0.537864	0.776699	1	0.003883	0.24466	0.473786	0.700971	0.990291	0.001942	0.194175	0.421359	0.753398	0.992233	0.737864	0.102913	0.159223	0.038911	0.027237	0.007782	0.001942	0.357282	0.541748	0.726214	1	0.052427	0.159223	0.223301	0.291262	0.968932	0.009709	0.124272	0.174757	0.848544	0.91068	0.221359	0.206226	0.005825	0.11068	0.219417	0.718447	0.968932	0.392233
0.30102	0.428571	0.270408	0.253197	0.173913	0.237852	0.007653	0.227041	0.47449	0.721939	1	0.015306	0.288265	0.556122	0.811224	0.997449	0.002551	0.183673	0.446429	0.69898	0.992347	0.558673	0.214286	0.227041	0.081841	0.051151	0	0.002551	0.265306	0.561224	0.859694	1	0.02551	0.178571	0.392857	0.576531	0.742347	0.056122	0.216837	0.433673	0.691327	0.795918	0.510204	0.286445	0.022959	0.295918	0.594388	0.829082	0.987245	0.428571
0.375	0.291667	0.333333	0.221053	0.305263	0.178947	0.020833	0.260417	0.5	0.6875	0.979167	0.03125	0.1875	0.479167	0.791667	0.989583	0.010417	0.229167	0.489583	0.739583	1	0.4375	0.302083	0.260417	0.126316	0.063158	0	0.010417	0.239583	0.635417	0.78125	1	0.260417	0.520833	0.59375	0.822917	0.958333	0.03125	0.145833	0.208333	0.416667	0.489583	0.375	0.442105	0.041667	0.208333	0.479167	0.75	0.96875	0.302083
0.354535	0.285041	0.360424	0.193396	0.246462	0.205189	0.004711	0.268551	0.514723	0.791519	1	0.003534	0.281508	0.507656	0.727915	0.998822	0.001178	0.203769	0.468787	0.722026	0.992933	0.3298	0.189635	0.480565	0.069575	0.083726	0.003538	0.001178	0.314488	0.539458	0.762073	1	0.146054	0.308598	0.546525	0.829211	0.995289	0.011779	0.166078	0.436985	0.689046	0.96702	0.542992	0.382075	0.010601	0.274441	0.475854	0.705536	0.992933	0.286219
0.403409	0.329545	0.267045	0.302857	0.171429	0.2	0.017045	0.204545	0.522727	0.806818	1	0.011364	0.170455	0.448864	0.676136	0.977273	0.005682	0.306818	0.5	0.744318	0.982955	0.414773	0.261364	0.323864	0.074286	0.074286	0.017143	0.005682	0.159091	0.397727	0.573864	1	0.176136	0.295455	0.465909	0.75	0.840909	0.017045	0.267045	0.642045	0.903409	0.988636	0.403409	0.297143	0.176136	0.329545	0.494318	0.727273	0.982955	0.335227
0.341121	0.327103	0.331776	0.211268	0.234742	0.248826	0.023364	0.28972	0.485981	0.799065	1	0.009346	0.228972	0.514019	0.733645	0.957944	0.004673	0.182243	0.481308	0.719626	0.995327	0.397196	0.364486	0.238318	0.140845	0.028169	0	0.004673	0.28972	0.602804	0.878505	1	0.11215	0.242991	0.406542	0.668224	0.939252	0.014019	0.065421	0.471963	0.53271	0.869159	0.481308	0.450704	0.014019	0.200935	0.495327	0.672897	0.962617	0.32243
0.291105	0.361186	0.347709	0.194595	0.194595	0.259459	0.024259	0.210243	0.458221	0.684636	0.994609	0.005391	0.239892	0.512129	0.733154	0.997305	0.002695	0.277628	0.509434	0.778976	1	0.45283	0.221024	0.326146	0.083784	0.056757	0.002703	0.002695	0.207547	0.487871	0.754717	1	0.016173	0.28841	0.433962	0.762803	0.894879	0.021563	0.253369	0.568733	0.74124	0.994609	0.528302	0.362162	0.013477	0.296496	0.54717	0.816712	0.989218	0.380054
0.291005	0.449735	0.259259	0.207447	0.18617	0.260638	0.058201	0.333333	0.62963	0.851852	0.978836	0.010582	0.179894	0.417989	0.608466	0.989418	0.005291	0.275132	0.455026	0.730159	1	0.375661	0.132275	0.492063	0.053191	0.085106	0	0.005291	0.126984	0.248677	0.502646	1	0.15873	0.26455	0.666667	0.867725	0.994709	0.015873	0.407407	0.566138	0.761905	0.962963	0.460317	0.393617	0.015873	0.174603	0.417989	0.666667	0.984127	0.486772
0.329208	0.361386	0.309406	0.2134	0.188586	0.26799	0.00495	0.264851	0.490099	0.777228	0.997525	0.007426	0.215347	0.509901	0.727723	0.987624	0.002475	0.25	0.487624	0.720297	1	0.371287	0.084158	0.544554	0.034739	0.114144	0.004963	0.002475	0.222772	0.425743	0.735149	1	0.05198	0.108911	0.195545	0.287129	0.35396	0.014851	0.393564	0.574257	0.772277	0.985149	0.534653	0.436725	0.009901	0.247525	0.435644	0.685644	0.980198	0.376238
0.303614	0.361446	0.33494	0.248792	0.214976	0.241546	0.004819	0.289157	0.546988	0.754217	0.992771	0.007229	0.221687	0.489157	0.73494	1	0.00241	0.238554	0.448193	0.742169	0.99759	0.60241	0.120482	0.277108	0.05314	0.082126	0	0.00241	0.291566	0.53012	0.746988	1	0.012048	0.077108	0.286747	0.395181	0.86506	0.036145	0.250602	0.554217	0.845783	0.995181	0.522892	0.371981	0.009639	0.204819	0.404819	0.778313	0.99759	0.361446
0.337079	0.41573	0.247191	0.278873	0.15493	0.216901	0.005618	0.230337	0.474719	0.755618	0.997191	0.008427	0.27809	0.542135	0.764045	0.988764	0.002809	0.219101	0.469101	0.716292	1	0.542135	0.168539	0.289326	0.070423	0.053521	0.008451	0.002809	0.272472	0.530899	0.794944	1	0.087079	0.148876	0.491573	0.733146	0.977528	0.05618	0.247191	0.441011	0.679775	0.896067	0.424157	0.383099	0.022472	0.241573	0.438202	0.69382	0.994382	0.455056
0.335938	0.390625	0.273438	0.267717	0.15748	0.244094	0.023438	0.210938	0.398438	0.71875	0.992188	0.015625	0.21875	0.539062	0.773438	1	0.007812	0.28125	0.554688	0.734375	0.960938	0.242188	0.046875	0.710938	0.015748	0.07874	0	0.007812	0.054688	0.5625	0.703125	1	0.945312	0.945312	0.960938	0.96875	0.984375	0.0625	0.28125	0.460938	0.71875	0.914062	0.445312	0.456693	0.03125	0.328125	0.523438	0.742188	0.96875	0.375
0.321918	0.424658	0.253425	0.282759	0.165517	0.255172	0.020548	0.191781	0.506849	0.753425	1	0.013699	0.267123	0.493151	0.746575	0.965753	0.006849	0.253425	0.417808	0.657534	0.945205	0.527397	0.287671	0.184932	0.096552	0.027586	0	0.006849	0.130137	0.452055	0.746575	1	0.150685	0.253425	0.349315	0.684932	0.883562	0.527397	0.561644	0.609589	0.767123	0.815068	0.445205	0.344828	0.034247	0.328767	0.520548	0.719178	0.945205	0.431507
0.285036	0.534442	0.180523	0.283333	0.116667	0.154762	0.004751	0.19715	0.384798	0.63658	0.995249	0.016627	0.406176	0.631829	0.814727	0.997625	0.002375	0.125891	0.299287	0.501188	1	0.726841	0.149644	0.123515	0.059524	0.035714	0.002381	0.002375	0.437055	0.619952	0.807601	1	0.019002	0.114014	0.230404	0.330166	0.928741	0.009501	0.066508	0.263658	0.35867	0.895487	0.638955	0.242857	0.016627	0.36342	0.591449	0.767221	0.988124	0.505938
0.31441	0.366812	0.318777	0.236842	0.22807	0.232456	0.0131	0.257642	0.49345	0.733624	0.995633	0.004367	0.209607	0.406114	0.71179	0.982533	0.034934	0.28821	0.576419	0.772926	1	0.349345	0.017467	0.633188	0.008772	0.078947	0	0.004367	0.087336	0.454148	0.855895	1	0.41048	0.41048	0.414847	0.419214	0.423581	0.091703	0.28821	0.532751	0.703057	0.991266	0.49345	0.473684	0.017467	0.222707	0.471616	0.694323	0.9869	0.406114
0.416667	0.270833	0.3125	0.231579	0.231579	0.178947	0.052083	0.3125	0.552083	0.75	0.979167	0.03125	0.166667	0.40625	0.71875	1	0.010417	0.21875	0.479167	0.6875	0.989583	0.333333	0.25	0.416667	0.126316	0.063158	0	0.010417	0.208333	0.53125	0.885417	1	0.177083	0.479167	0.760417	0.84375	0.979167	0.041667	0.135417	0.395833	0.614583	0.71875	0.4375	0.421053	0.0625	0.25	0.489583	0.739583	0.96875	0.28125
0.279236	0.389021	0.331742	0.203349	0.19378	0.222488	0.026253	0.324582	0.515513	0.799523	0.99284	0.004773	0.164678	0.463007	0.711217	0.995227	0.002387	0.272076	0.522673	0.74463	1	0.48926	0.147971	0.362768	0.055024	0.083732	0.011962	0.002387	0.236277	0.527446	0.756563	1	0.023866	0.097852	0.26253	0.460621	0.961814	0.038186	0.317422	0.548926	0.794749	0.995227	0.587112	0.37799	0.01432	0.26969	0.477327	0.725537	0.995227	0.396181
0.347911	0.330418	0.321672	0.218872	0.216926	0.236381	0.001944	0.237123	0.458698	0.718173	0.996113	0.007775	0.242954	0.50826	0.750243	0.999028	0.000972	0.262391	0.52964	0.773567	1	0.471331	0.200194	0.328474	0.070039	0.064202	0.007782	0.000972	0.272109	0.456754	0.746356	1	0.004859	0.283771	0.489796	0.742468	0.979592	0.015549	0.195335	0.601555	0.783285	0.897959	0.535471	0.340467	0.002915	0.250729	0.52964	0.762877	0.998056	0.360544
0.380952	0.35119	0.267857	0.298507	0.18806	0.173134	0.008929	0.232143	0.517857	0.800595	1	0.005952	0.270833	0.508929	0.75	0.994048	0.002976	0.238095	0.443452	0.642857	0.97619	0.443452	0.172619	0.383929	0.080597	0.074627	0.002985	0.002976	0.247024	0.544643	0.803571	1	0.074405	0.202381	0.494048	0.642857	0.931548	0.008929	0.264881	0.46131	0.71131	0.982143	0.369048	0.4	0.014881	0.247024	0.443452	0.645833	0.985119	0.369048
0.459854	0.29781	0.242336	0.247076	0.192982	0.168129	0.00292	0.265693	0.49635	0.770803	1	0.005839	0.251095	0.50219	0.728467	0.99708	0.00146	0.227737	0.490511	0.713869	0.986861	0.477372	0.191241	0.331387	0.068713	0.065789	0.004386	0.00146	0.205839	0.437956	0.716788	1	0.039416	0.256934	0.465693	0.681752	0.932847	0.056934	0.331387	0.629197	0.835036	0.99562	0.410219	0.330409	0.014599	0.258394	0.464234	0.684672	0.986861	0.359124
0.390977	0.315789	0.293233	0.265152	0.181818	0.219697	0.022556	0.24812	0.518797	0.75188	1	0.015038	0.210526	0.458647	0.721805	0.969925	0.007519	0.270677	0.473684	0.729323	0.924812	0.300752	0.360902	0.338346	0.045455	0.060606	0.015152	0.007519	0.105263	0.323308	0.609023	1	0.150376	0.654135	0.744361	0.849624	0.93985	0.06015	0.278195	0.390977	0.511278	0.631579	0.421053	0.439394	0.150376	0.308271	0.526316	0.736842	0.924812	0.323308
0.434211	0.25	0.315789	0.205298	0.304636	0.165563	0.013158	0.276316	0.460526	0.684211	1	0.085526	0.256579	0.552632	0.769737	0.986842	0.006579	0.164474	0.539474	0.796053	0.993421	0.355263	0.315789	0.328947	0.13245	0.05298	0.013245	0.006579	0.144737	0.552632	0.763158	1	0.013158	0.243421	0.605263	0.868421	0.967105	0.059211	0.309211	0.394737	0.473684	0.802632	0.375	0.450331	0.019737	0.197368	0.506579	0.723684	0.953947	0.263158
0.398827	0.313783	0.28739	0.255882	0.235294	0.197059	0.017595	0.272727	0.504399	0.83871	1	0.005865	0.28739	0.560117	0.747801	0.970674	0.002933	0.178886	0.428152	0.648094	0.941349	0.390029	0.202346	0.407625	0.064706	0.052941	0.011765	0.002933	0.222874	0.636364	0.900293	1	0.02346	0.105572	0.240469	0.656891	0.806452	0.143695	0.331378	0.44868	0.71261	0.868035	0.439883	0.452941	0.008798	0.211144	0.472141	0.674487	0.970674	0.343109
0.362708	0.309068	0.328225	0.221228	0.257033	0.195652	0.007663	0.293742	0.53129	0.749681	0.994891	0.002554	0.219668	0.473819	0.729246	0.997446	0.001277	0.217114	0.44189	0.772669	1	0.47765	0.246488	0.275862	0.086957	0.066496	0.002558	0.001277	0.236271	0.537676	0.753512	1	0.005109	0.251596	0.505747	0.772669	0.971903	0.066411	0.283525	0.402299	0.727969	0.996169	0.538953	0.375959	0.006386	0.215837	0.427842	0.722861	0.996169	0.357599
0.385496	0.299618	0.314885	0.223709	0.240918	0.189293	0.01145	0.209924	0.398855	0.688931	1	0.003817	0.354962	0.597328	0.79771	0.998092	0.001908	0.221374	0.5	0.721374	0.996183	0.183206	0.05916	0.757634	0.021033	0.059273	0.001912	0.001908	0.480916	0.688931	0.826336	1	0.410305	0.437023	0.492366	0.912214	0.984733	0.005725	0.192748	0.387405	0.69084	0.996183	0.486641	0.413002	0.005725	0.377863	0.593511	0.782443	0.992366	0.30916
0.423729	0.262712	0.313559	0.196581	0.316239	0.196581	0.016949	0.211864	0.516949	0.720339	0.991525	0.042373	0.245763	0.457627	0.754237	0.974576	0.008475	0.237288	0.449153	0.745763	1	0.338983	0.220339	0.440678	0.08547	0.068376	0	0.008475	0.220339	0.533898	0.805085	1	0.228814	0.271186	0.355932	0.440678	0.847458	0.033898	0.135593	0.601695	0.711864	0.957627	0.423729	0.25641	0.127119	0.322034	0.474576	0.788136	0.983051	0.29661
0.397576	0.345455	0.25697	0.256068	0.199029	0.163835	0.006061	0.306667	0.58303	0.803636	1	0.002424	0.220606	0.464242	0.718788	0.995152	0.001212	0.21697	0.398788	0.667879	0.997576	0.446061	0.124848	0.429091	0.052184	0.076456	0.003641	0.001212	0.236364	0.569697	0.740606	1	0.048485	0.246061	0.395152	0.574545	0.97697	0.030303	0.253333	0.521212	0.755152	0.996364	0.390303	0.300971	0.042424	0.214545	0.379394	0.552727	0.996364	0.397576
0.333333	0.373984	0.292683	0.270492	0.172131	0.262295	0.02439	0.219512	0.422764	0.682927	0.99187	0.03252	0.243902	0.552846	0.780488	1	0.00813	0.317073	0.528455	0.764228	0.98374	0.235772	0	0.764228	0	0.081967	0	0.00813	0.056911	0.227642	0.715447	1	0	0	0	0	0	0.065041	0.300813	0.495935	0.764228	0.97561	0.430894	0.459016	0.03252	0.325203	0.528455	0.739837	0.95122	0.349593
0.309859	0.380282	0.309859	0.2	0.257143	0.214286	0.028169	0.211268	0.535211	0.859155	0.985915	0.056338	0.267606	0.521127	0.661972	1	0.014085	0.169014	0.43662	0.591549	0.887324	0.549296	0.323944	0.126761	0.142857	0.028571	0	0.014085	0.126761	0.408451	0.661972	1	0.15493	0.211268	0.422535	0.605634	0.774648	0.830986	0.84507	0.873239	0.901408	0.943662	0.366197	0.428571	0.070423	0.225352	0.492958	0.605634	0.943662	0.394366
0.360759	0.316456	0.322785	0.229299	0.242038	0.197452	0.018987	0.234177	0.468354	0.753165	0.993671	0.012658	0.208861	0.518987	0.71519	1	0.006329	0.265823	0.474684	0.746835	0.987342	0.341772	0.139241	0.518987	0.050955	0.089172	0.012739	0.006329	0.082278	0.436709	0.721519	1	0.462025	0.487342	0.544304	0.949367	0.987342	0.126582	0.265823	0.417722	0.734177	0.943038	0.481013	0.458599	0.044304	0.278481	0.550633	0.759494	0.987342	0.291139
0.360294	0.25	0.389706	0.177778	0.251852	0.162963	0.036765	0.25	0.477941	0.735294	0.985294	0.051471	0.330882	0.514706	0.625	0.977941	0.007353	0.205882	0.404412	0.786765	1	0.595588	0.397059	0.007353	0.140741	0.007407	0.007407	0.007353	0.367647	0.544118	0.691176	1	0.014706	0.161765	0.316176	0.794118	0.992647	0.397059	0.397059	0.397059	0.397059	0.397059	0.536765	0.340741	0.014706	0.323529	0.558824	0.772059	0.977941	0.227941
0.39759	0.277108	0.325301	0.207317	0.207317	0.207317	0.036145	0.277108	0.46988	0.710843	0.951807	0.024096	0.13253	0.39759	0.759036	0.975904	0.012048	0.192771	0.493976	0.674699	1	0.385542	0.289157	0.325301	0.097561	0.073171	0	0.012048	0.13253	0.542169	0.819277	1	0.048193	0.301205	0.60241	0.674699	0.807229	0.144578	0.204819	0.445783	0.53012	0.951807	0.39759	0.487805	0.048193	0.180723	0.445783	0.650602	0.963855	0.301205
0.419355	0.305806	0.274839	0.245478	0.22093	0.180879	0.003871	0.27871	0.597419	0.816774	1	0.005161	0.229677	0.447742	0.71871	0.99871	0.00129	0.223226	0.437419	0.636129	0.997419	0.454194	0.123871	0.421935	0.059432	0.080103	0.002584	0.00129	0.243871	0.534194	0.748387	1	0.046452	0.255484	0.384516	0.512258	0.975484	0.024516	0.263226	0.531613	0.774194	0.996129	0.414194	0.325581	0.005161	0.210323	0.389677	0.574194	0.996129	0.357419
0.407407	0.333333	0.259259	0.308411	0.186916	0.196262	0.027778	0.203704	0.509259	0.722222	1	0.018519	0.222222	0.388889	0.703704	0.962963	0.009259	0.416667	0.564815	0.833333	0.981481	0.675926	0.046296	0.277778	0.056075	0.074766	0	0.009259	0.166667	0.351852	0.537037	1	0.194444	0.194444	0.203704	0.509259	0.685185	0.546296	0.611111	0.824074	0.888889	0.972222	0.361111	0.429907	0.037037	0.444444	0.62963	0.861111	0.981481	0.361111
0.312925	0.37415	0.312925	0.225256	0.204778	0.242321	0.010204	0.190476	0.5	0.744898	0.996599	0.006803	0.285714	0.486395	0.734694	1	0.003401	0.231293	0.537415	0.765306	0.993197	0.452381	0.238095	0.309524	0.088737	0.081911	0.013652	0.003401	0.227891	0.455782	0.693878	1	0.030612	0.210884	0.380952	0.489796	0.996599	0.085034	0.323129	0.690476	0.880952	0.972789	0.527211	0.354949	0.034014	0.309524	0.486395	0.714286	0.989796	0.391156
0.357977	0.459144	0.182879	0.332031	0.175781	0.140625	0.011673	0.225681	0.521401	0.762646	0.992218	0.007782	0.241245	0.494163	0.774319	1	0.003891	0.322957	0.474708	0.66537	0.988327	0.719844	0.101167	0.178988	0.03125	0.03125	0	0.003891	0.22179	0.400778	0.762646	1	0.416342	0.513619	0.540856	0.595331	0.708171	0.035019	0.07393	0.610895	0.937743	0.984436	0.361868	0.335938	0.019455	0.272374	0.490272	0.684825	0.988327	0.501946
0.373626	0.344041	0.282333	0.236041	0.205584	0.193739	0.002536	0.202029	0.431107	0.716822	0.999155	0.001691	0.258664	0.509721	0.75317	0.995773	0.000845	0.344041	0.543533	0.764159	1	0.415046	0.114117	0.470837	0.038917	0.093063	0.003384	0.000845	0.209637	0.46492	0.726965	1	0.034658	0.474218	0.621302	0.897718	0.989856	0.003381	0.248521	0.482671	0.760778	0.993238	0.457312	0.328257	0.003381	0.393068	0.596788	0.795435	0.997464	0.373626
0.302158	0.316547	0.381295	0.181159	0.217391	0.23913	0.014388	0.230216	0.402878	0.647482	1	0.064748	0.215827	0.52518	0.719424	0.971223	0.007194	0.273381	0.546763	0.776978	0.985612	0.338129	0.323741	0.338129	0.115942	0.057971	0	0.007194	0.244604	0.482014	0.669065	1	0.028777	0.100719	0.208633	0.553957	0.697842	0.309353	0.381295	0.755396	0.899281	0.985612	0.553957	0.434783	0.035971	0.273381	0.568345	0.726619	0.985612	0.280576
0.41791	0.313433	0.268657	0.263158	0.218045	0.180451	0.037313	0.261194	0.514925	0.813433	0.985075	0.022388	0.201493	0.462687	0.701493	1	0.007463	0.216418	0.477612	0.69403	0.992537	0.402985	0.268657	0.328358	0.135338	0.075188	0.015038	0.007463	0.298507	0.514925	0.686567	1	0.19403	0.373134	0.5	0.656716	0.985075	0.044776	0.141791	0.268657	0.850746	0.932836	0.335821	0.421053	0.104478	0.313433	0.5	0.69403	0.895522	0.30597
0.330275	0.302752	0.366972	0.203704	0.25	0.240741	0.036697	0.247706	0.495413	0.779817	1	0.018349	0.302752	0.513761	0.733945	0.963303	0.009174	0.229358	0.440367	0.715596	0.990826	0.422018	0.577982	0	0.203704	0	0	0.009174	0.275229	0.522936	0.752294	1	0.027523	0.229358	0.449541	0.706422	0.981651	0	0	0	0	0	0.431193	0.314815	0.045872	0.238532	0.568807	0.697248	0.990826	0.357798
0.313316	0.441253	0.245431	0.244444	0.154248	0.215686	0.003916	0.201044	0.385117	0.651436	1	0.002611	0.308094	0.552219	0.805483	0.997389	0.001305	0.259791	0.549608	0.711488	0.989556	0.672324	0.122715	0.204961	0.060131	0.049673	0.007843	0.001305	0.234987	0.47389	0.780679	1	0.020888	0.437337	0.579634	0.677546	0.964752	0.018277	0.244125	0.422977	0.685379	0.920366	0.458225	0.360784	0.007833	0.362924	0.584856	0.800261	0.993473	0.432115
0.27027	0.525799	0.203931	0.275862	0.110837	0.192118	0.004914	0.199017	0.371007	0.55774	1	0.009828	0.358722	0.628993	0.798526	0.995086	0.002457	0.154791	0.353808	0.58231	0.987715	0.710074	0.149877	0.140049	0.059113	0.039409	0	0.002457	0.429975	0.643735	0.820639	1	0.027027	0.125307	0.206388	0.375921	0.459459	0.017199	0.149877	0.240786	0.334152	0.484029	0.513514	0.305419	0.022113	0.336609	0.565111	0.712531	0.990172	0.530713
0.362245	0.306122	0.331633	0.202046	0.263427	0.209719	0.010204	0.247449	0.528061	0.752551	0.994898	0.005102	0.229592	0.454082	0.714286	1	0.002551	0.267857	0.497449	0.755102	0.987245	0.387755	0.186224	0.42602	0.076726	0.081841	0	0.002551	0.280612	0.553571	0.77551	1	0.09949	0.262755	0.566327	0.798469	0.933673	0.007653	0.206633	0.466837	0.719388	0.987245	0.563776	0.393862	0.007653	0.27551	0.482143	0.729592	0.987245	0.27551
0.428941	0.302326	0.268734	0.266839	0.256477	0.176166	0.005168	0.217054	0.457364	0.751938	0.994832	0.020672	0.299742	0.542636	0.77261	1	0.002584	0.224806	0.488372	0.726098	0.997416	0.364341	0.25323	0.382429	0.072539	0.072539	0.005181	0.002584	0.21447	0.403101	0.682171	1	0.142119	0.387597	0.503876	0.635659	0.899225	0.007752	0.22739	0.583979	0.873385	0.994832	0.475452	0.398964	0.01292	0.30491	0.534884	0.73385	0.989664	0.310078
0.383178	0.35514	0.261682	0.28169	0.234742	0.201878	0.014019	0.219626	0.528037	0.775701	0.995327	0.009346	0.285047	0.5	0.724299	1	0.004673	0.228972	0.481308	0.682243	0.990654	0.415888	0.116822	0.46729	0.056338	0.103286	0	0.004673	0.191589	0.476636	0.682243	1	0.158879	0.182243	0.228972	0.285047	0.607477	0.056075	0.392523	0.635514	0.803738	0.985981	0.565421	0.347418	0.018692	0.247664	0.429907	0.602804	0.915888	0.32243
0.376721	0.352941	0.270338	0.243108	0.174185	0.197995	0.005006	0.176471	0.434293	0.71214	1	0.010013	0.28035	0.555695	0.773467	0.996245	0.001252	0.345432	0.530663	0.743429	0.998748	0.515645	0.117647	0.366708	0.04386	0.068922	0.006266	0.001252	0.188986	0.379224	0.692115	1	0.005006	0.390488	0.555695	0.710889	0.997497	0.015019	0.366708	0.624531	0.841051	0.992491	0.428035	0.333333	0.003755	0.360451	0.543179	0.763454	0.997497	0.387985
0.334577	0.349502	0.31592	0.225405	0.224159	0.227895	0.007463	0.253731	0.493781	0.727612	1	0.004975	0.254975	0.504975	0.748756	0.987562	0.001244	0.235075	0.492537	0.762438	0.998756	0.466418	0.24005	0.293532	0.103362	0.053549	0.003736	0.001244	0.210199	0.46393	0.75	1	0.038557	0.207711	0.424129	0.794776	0.998756	0.006219	0.323383	0.54602	0.705224	0.992537	0.56592	0.400996	0.003731	0.263682	0.477612	0.737562	0.998756	0.369403
0.375587	0.422535	0.201878	0.292453	0.150943	0.193396	0.014085	0.183099	0.483568	0.699531	0.985915	0.023474	0.29108	0.619718	0.798122	1	0.004695	0.201878	0.441315	0.671362	0.892019	0.657277	0.056338	0.286385	0.033019	0.061321	0.004717	0.004695	0.28169	0.610329	0.807512	1	0.244131	0.253521	0.666667	0.774648	0.896714	0.051643	0.169014	0.455399	0.535211	0.882629	0.338028	0.386792	0.089202	0.309859	0.558685	0.812207	0.967136	0.450704
0.316327	0.346939	0.336735	0.220513	0.25641	0.261538	0.010204	0.209184	0.479592	0.688776	1	0.015306	0.229592	0.52551	0.80102	0.994898	0.005102	0.285714	0.484694	0.714286	0.933673	0.413265	0.469388	0.117347	0.123077	0.041026	0	0.005102	0.30102	0.591837	0.831633	1	0.015306	0.321429	0.489796	0.673469	0.928571	0.112245	0.132653	0.265306	0.295918	0.979592	0.44898	0.492308	0.020408	0.270408	0.479592	0.719388	0.933673	0.331633
0.385542	0.373494	0.240964	0.333333	0.218182	0.163636	0.012048	0.216867	0.475904	0.728916	1	0.018072	0.295181	0.554217	0.837349	0.993976	0.006024	0.210843	0.439759	0.596386	0.957831	0.36747	0.307229	0.325301	0.09697	0.060606	0	0.006024	0.174699	0.445783	0.801205	1	0.036145	0.271084	0.391566	0.487952	0.927711	0.060241	0.596386	0.698795	0.777108	0.885542	0.379518	0.387879	0.03012	0.23494	0.415663	0.614458	0.957831	0.39759
0.397177	0.358871	0.243952	0.266667	0.185859	0.181818	0.006048	0.185484	0.417339	0.72379	0.997984	0.004032	0.252016	0.495968	0.756048	0.991935	0.002016	0.403226	0.574597	0.774194	1	0.612903	0.165323	0.221774	0.068687	0.068687	0	0.002016	0.191532	0.366935	0.635081	1	0.235887	0.471774	0.671371	0.877016	0.977823	0.020161	0.316532	0.627016	0.784274	0.987903	0.342742	0.290909	0.020161	0.40121	0.594758	0.802419	0.989919	0.417339
0.419094	0.326861	0.254045	0.246353	0.19611	0.171799	0.006472	0.173139	0.377023	0.731392	1	0.003236	0.323625	0.555016	0.770227	0.995146	0.001618	0.33657	0.532362	0.736246	0.982201	0.524272	0.090615	0.385113	0.038898	0.08752	0	0.001618	0.174757	0.490291	0.822006	1	0.440129	0.564725	0.650485	0.771845	0.886731	0.027508	0.286408	0.415858	0.665049	0.977346	0.438511	0.311183	0.021036	0.346278	0.543689	0.695793	0.988673	0.375405
0.338028	0.28169	0.380282	0.242857	0.257143	0.242857	0.042254	0.309859	0.605634	0.71831	1	0.028169	0.183099	0.394366	0.704225	0.929577	0.014085	0.197183	0.450704	0.774648	0.985915	0.43662	0.309859	0.253521	0.171429	0.057143	0.028571	0.014085	0.323944	0.591549	0.760563	1	0.056338	0.169014	0.633803	0.84507	0.985915	0.140845	0.211268	0.28169	0.422535	0.492958	0.380282	0.514286	0.070423	0.211268	0.394366	0.746479	0.985915	0.323944
0.313152	0.402923	0.283925	0.225941	0.202929	0.225941	0.010438	0.367432	0.551148	0.755741	1	0.004175	0.177453	0.394572	0.720251	0.997912	0.002088	0.302714	0.51357	0.762004	0.991649	0.60334	0.14405	0.25261	0.054393	0.054393	0	0.002088	0.254697	0.507307	0.764092	1	0.068894	0.411273	0.584551	0.843424	0.983299	0.010438	0.179541	0.425887	0.638831	0.956159	0.511482	0.292887	0.008351	0.160752	0.384134	0.659708	0.987474	0.413361
0.39483	0.373678	0.231492	0.317647	0.172941	0.174118	0.0047	0.19389	0.458284	0.728555	1	0.00235	0.243243	0.473561	0.753231	0.998825	0.001175	0.393655	0.567568	0.766157	0.99765	0.571093	0.108108	0.320799	0.04	0.068235	0.002353	0.001175	0.182139	0.383079	0.745006	1	0.130435	0.478261	0.573443	0.714454	0.915394	0.047004	0.368978	0.584019	0.760282	0.996475	0.427732	0.327059	0.005875	0.400705	0.581669	0.759107	0.99765	0.407756
0.423729	0.378531	0.19774	0.335227	0.102273	0.1875	0.028249	0.231638	0.564972	0.841808	1	0.011299	0.214689	0.457627	0.689266	0.99435	0.00565	0.265537	0.435028	0.632768	0.943503	0.463277	0.259887	0.276836	0.073864	0.039773	0.017045	0.00565	0.112994	0.367232	0.553672	1	0.146893	0.265537	0.435028	0.717514	0.80226	0.220339	0.570621	0.644068	0.887006	0.960452	0.446328	0.306818	0.016949	0.271186	0.451977	0.694915	0.943503	0.367232
0.295597	0.399371	0.305031	0.189274	0.192429	0.258675	0.015723	0.204403	0.525157	0.779874	1	0.006289	0.261006	0.522013	0.786164	0.996855	0.003145	0.22956	0.462264	0.654088	0.918239	0.45283	0.157233	0.389937	0.053628	0.085174	0.003155	0.003145	0.191824	0.443396	0.713836	1	0.015723	0.27673	0.424528	0.606918	0.688679	0.012579	0.248428	0.522013	0.795597	0.933962	0.506289	0.410095	0.009434	0.245283	0.462264	0.650943	0.927673	0.424528
0.347826	0.336957	0.315217	0.230769	0.208791	0.197802	0.054348	0.195652	0.423913	0.836957	0.978261	0.021739	0.391304	0.630435	0.76087	1	0.01087	0.184783	0.347826	0.608696	0.804348	0.467391	0.358696	0.173913	0.10989	0.043956	0.021978	0.01087	0.315217	0.73913	0.880435	1	0.25	0.369565	0.48913	0.597826	0.782609	0.032609	0.108696	0.152174	0.195652	0.663043	0.456522	0.285714	0.097826	0.293478	0.456522	0.630435	0.793478	0.293478
0.40081	0.323887	0.275304	0.284553	0.203252	0.182927	0.016194	0.230769	0.51417	0.753036	0.995951	0.008097	0.283401	0.510121	0.789474	1	0.004049	0.246964	0.449393	0.651822	0.983806	0.291498	0.109312	0.59919	0.03252	0.105691	0	0.004049	0.182186	0.34413	0.708502	1	0.469636	0.801619	0.846154	0.882591	0.910931	0.032389	0.275304	0.481781	0.647773	0.979757	0.493927	0.357724	0.032389	0.271255	0.469636	0.668016	0.983806	0.287449
0.378641	0.339806	0.281553	0.303922	0.205882	0.156863	0.038835	0.252427	0.427184	0.728155	0.990291	0.067961	0.242718	0.563107	0.786408	1	0.009709	0.116505	0.407767	0.699029	0.912621	0.61165	0.097087	0.291262	0.098039	0.098039	0	0.009709	0.203883	0.368932	0.679612	1	0.097087	0.106796	0.524272	0.543689	0.708738	0.126214	0.407767	0.61165	0.825243	0.912621	0.38835	0.392157	0.07767	0.252427	0.495146	0.699029	0.961165	0.349515
0.347107	0.318182	0.334711	0.215768	0.19917	0.240664	0.008264	0.22314	0.487603	0.719008	0.995868	0.016529	0.27686	0.545455	0.780992	0.979339	0.004132	0.247934	0.450413	0.714876	1	0.516529	0.330579	0.152893	0.13278	0.041494	0.016598	0.004132	0.264463	0.557851	0.818182	1	0.115702	0.285124	0.533058	0.731405	0.96281	0.008264	0.041322	0.099174	0.475207	0.987603	0.549587	0.390041	0.016529	0.31405	0.533058	0.780992	0.991736	0.285124
0.361905	0.342857	0.295238	0.240385	0.307692	0.182692	0.028571	0.209524	0.542857	0.72381	1	0.019048	0.257143	0.4	0.733333	0.990476	0.009524	0.219048	0.47619	0.780952	0.961905	0.380952	0.27619	0.342857	0.086538	0.048077	0.009615	0.009524	0.361905	0.533333	0.838095	1	0.028571	0.085714	0.438095	0.685714	0.961905	0.12381	0.2	0.571429	0.657143	0.819048	0.419048	0.519231	0.038095	0.257143	0.495238	0.695238	0.952381	0.352381
0.370618	0.325543	0.30384	0.214047	0.217391	0.198997	0.003339	0.203673	0.479132	0.752922	0.998331	0.006678	0.257095	0.467446	0.741235	1	0.001669	0.308848	0.529215	0.732888	0.993322	0.435726	0.153589	0.410684	0.056856	0.090301	0.006689	0.001669	0.15025	0.355593	0.687813	1	0.026711	0.400668	0.589316	0.737896	0.861436	0.005008	0.327212	0.542571	0.786311	0.994992	0.482471	0.327759	0.005008	0.350584	0.524207	0.734558	0.993322	0.348915
0.456107	0.316794	0.227099	0.292543	0.18738	0.1587	0.015267	0.270992	0.48855	0.757634	1	0.005725	0.194656	0.480916	0.730916	0.998092	0.001908	0.200382	0.555344	0.740458	0.98855	0.553435	0.173664	0.272901	0.080306	0.072658	0.007648	0.001908	0.23855	0.505725	0.812977	1	0.020992	0.375954	0.549618	0.742366	0.990458	0.03626	0.263359	0.423664	0.631679	0.994275	0.301527	0.279159	0.01145	0.183206	0.566794	0.744275	0.98855	0.349237
0.446629	0.407303	0.146067	0.340845	0.152113	0.070423	0.005618	0.244382	0.511236	0.747191	1	0.008427	0.303371	0.578652	0.780899	0.994382	0.002809	0.109551	0.283708	0.438202	0.966292	0.713483	0.16573	0.120787	0.067606	0.028169	0	0.002809	0.342697	0.623596	0.803371	1	0.008427	0.115169	0.345506	0.435393	0.932584	0.042135	0.067416	0.154494	0.393258	0.783708	0.300562	0.321127	0.011236	0.154494	0.370787	0.58427	0.974719	0.426966
0.370871	0.333333	0.295796	0.245113	0.21203	0.209023	0.004505	0.243243	0.496997	0.750751	0.998498	0.006006	0.192192	0.441441	0.734234	0.992492	0.001502	0.325826	0.533033	0.749249	1	0.509009	0.124625	0.366366	0.039098	0.07218	0.009023	0.001502	0.13964	0.34985	0.737237	1	0.024024	0.405405	0.569069	0.684685	0.795796	0.013514	0.373874	0.558559	0.812312	0.947447	0.495495	0.345865	0.006006	0.301802	0.483483	0.726727	0.992492	0.34985
0.380952	0.342857	0.27619	0.230769	0.269231	0.182692	0.095238	0.27619	0.504762	0.72381	0.971429	0.047619	0.333333	0.590476	0.819048	1	0.009524	0.114286	0.314286	0.628571	0.952381	0.228571	0	0.771429	0	0.076923	0	0.009524	0.057143	0.561905	0.809524	1	0	0	0	0	0	0.07619	0.285714	0.47619	0.695238	0.961905	0.333333	0.461538	0.028571	0.142857	0.466667	0.714286	0.952381	0.32381
0.34188	0.32906	0.32906	0.236052	0.236052	0.240343	0.025641	0.299145	0.508547	0.75641	0.995726	0.008547	0.15812	0.461538	0.679487	1	0.004274	0.252137	0.470085	0.747863	0.991453	0.461538	0.376068	0.162393	0.137339	0.034335	0	0.004274	0.153846	0.495726	0.75641	1	0.115385	0.444444	0.606838	0.82906	0.978632	0.025641	0.17094	0.213675	0.260684	0.512821	0.525641	0.377682	0.017094	0.277778	0.521368	0.764957	0.978632	0.299145
0.2134	0.506203	0.280397	0.176617	0.121891	0.288557	0.012407	0.203474	0.406948	0.66005	0.990074	0.004963	0.28536	0.558313	0.801489	1	0.002481	0.218362	0.424318	0.669975	0.992556	0.585608	0.171216	0.243176	0.069652	0.049751	0	0.002481	0.295285	0.531017	0.801489	1	0.039702	0.129032	0.290323	0.615385	0.905707	0.096774	0.208437	0.419355	0.756824	0.985112	0.516129	0.378109	0.039702	0.28536	0.513648	0.813896	0.992556	0.513648
0.365854	0.273171	0.360976	0.190709	0.249389	0.215159	0.004878	0.290244	0.560976	0.814634	0.997561	0.009756	0.236585	0.502439	0.736585	0.990244	0.002439	0.226829	0.436585	0.687805	1	0.356098	0.182927	0.460976	0.056235	0.100244	0.007335	0.002439	0.25122	0.54878	0.760976	1	0.085366	0.241463	0.443902	0.656098	0.780488	0.012195	0.209756	0.5	0.804878	0.973171	0.52439	0.337408	0.007317	0.202439	0.392683	0.663415	0.94878	0.256098
0.377049	0.306011	0.31694	0.214286	0.241758	0.236264	0.010929	0.229508	0.459016	0.775956	1	0.060109	0.256831	0.513661	0.748634	0.961749	0.005464	0.213115	0.480874	0.68306	0.978142	0.47541	0.284153	0.240437	0.098901	0.032967	0	0.005464	0.349727	0.513661	0.797814	1	0.021858	0.360656	0.579235	0.89071	0.983607	0.054645	0.10929	0.256831	0.617486	0.677596	0.513661	0.373626	0.038251	0.240437	0.519126	0.693989	0.978142	0.349727
0.281065	0.517751	0.201183	0.275903	0.119597	0.209591	0.004142	0.259172	0.489941	0.708284	0.998817	0.001183	0.230178	0.471006	0.759172	0.999408	0.000592	0.284615	0.577515	0.784615	1	0.878698	0.026627	0.094675	0.022499	0.023683	0.001184	0.000592	0.233136	0.457396	0.736686	1	0.03787	0.100592	0.606509	0.912426	0.935503	0.065089	0.663905	0.701183	0.897041	0.992308	0.491716	0.359976	0.007692	0.195266	0.512426	0.786391	0.997041	0.535503
0.298343	0.439227	0.262431	0.246537	0.166205	0.213296	0.008287	0.298343	0.533149	0.803867	1	0.005525	0.207182	0.455801	0.743094	0.997238	0.002762	0.273481	0.5	0.720994	0.991713	0.502762	0.11326	0.383978	0.066482	0.121884	0	0.002762	0.212707	0.436464	0.726519	1	0.013812	0.171271	0.417127	0.571823	0.690608	0.066298	0.345304	0.599448	0.823204	0.991713	0.480663	0.415512	0.01105	0.245856	0.447514	0.68232	0.991713	0.417127
0.338742	0.35497	0.306288	0.227642	0.195122	0.215447	0.008114	0.269777	0.537525	0.770791	0.995943	0.010142	0.298174	0.525355	0.750507	0.997972	0.002028	0.156187	0.40568	0.713996	1	0.46856	0.125761	0.40568	0.050813	0.103659	0.006098	0.002028	0.25355	0.614604	0.8357	1	0.004057	0.085193	0.31643	0.490872	0.975659	0.05071	0.275862	0.496957	0.636917	0.914807	0.513185	0.406504	0.006085	0.206897	0.413793	0.616633	0.993915	0.389452
0.344942	0.33665	0.318408	0.242525	0.232558	0.200997	0.021559	0.271973	0.474295	0.752902	0.996683	0.004975	0.189055	0.45937	0.721393	1	0.001658	0.283582	0.560531	0.78607	0.998342	0.532338	0.140962	0.3267	0.053156	0.066445	0.006645	0.001658	0.15257	0.344942	0.648425	1	0.238806	0.504146	0.681592	0.817579	0.961857	0.013267	0.361526	0.595357	0.792703	0.995025	0.547264	0.352159	0.00995	0.320066	0.533997	0.756219	0.993367	0.353234
0.320819	0.34471	0.334471	0.232877	0.191781	0.236301	0.013652	0.262799	0.467577	0.764505	0.996587	0.006826	0.194539	0.501706	0.706485	1	0.003413	0.245734	0.508532	0.771331	0.986348	0.443686	0.276451	0.279863	0.10274	0.054795	0.006849	0.003413	0.150171	0.406143	0.607509	1	0.010239	0.194539	0.307167	0.505119	0.699659	0.051195	0.744027	0.825939	0.914676	0.989761	0.566553	0.369863	0.006826	0.262799	0.498294	0.737201	0.982935	0.354949
0.306931	0.356436	0.336634	0.18	0.22	0.27	0.019802	0.19802	0.465347	0.762376	0.980198	0.059406	0.277228	0.544554	0.70297	1	0.009901	0.217822	0.425743	0.712871	0.920792	0.346535	0.306931	0.346535	0.08	0.06	0.02	0.009901	0.148515	0.524752	0.811881	1	0.039604	0.09901	0.475248	0.613861	0.910891	0.158416	0.227723	0.316832	0.752475	0.871287	0.475248	0.42	0.039604	0.217822	0.485149	0.70297	0.920792	0.336634
0.377778	0.316667	0.305556	0.251397	0.27933	0.184358	0.016667	0.2	0.5	0.772222	1	0.027778	0.277778	0.455556	0.7	0.977778	0.005556	0.238889	0.516667	0.727778	0.988889	0.4	0.394444	0.205556	0.145251	0.03352	0	0.005556	0.222222	0.538889	0.866667	1	0.038889	0.177778	0.483333	0.672222	0.972222	0.338889	0.383333	0.433333	0.805556	0.861111	0.488889	0.469274	0.027778	0.372222	0.516667	0.716667	0.961111	0.327778
0.441441	0.252252	0.306306	0.263636	0.290909	0.172727	0.018018	0.288288	0.531532	0.756757	1	0.045045	0.189189	0.378378	0.702703	0.927928	0.009009	0.234234	0.495495	0.72973	0.972973	0.432432	0.297297	0.27027	0.118182	0.063636	0.009091	0.009009	0.27027	0.630631	0.774775	1	0.036036	0.333333	0.603604	0.801802	0.963964	0.081081	0.135135	0.261261	0.45045	0.927928	0.396396	0.418182	0.036036	0.189189	0.45045	0.783784	0.972973	0.288288
0.466501	0.305211	0.228288	0.281095	0.199005	0.146766	0.007444	0.2134	0.454094	0.751861	1	0.004963	0.260546	0.545906	0.82134	0.985112	0.002481	0.317618	0.496278	0.669975	0.997519	0.511166	0.233251	0.255583	0.089552	0.064677	0	0.002481	0.26799	0.538462	0.784119	1	0.151365	0.377171	0.468983	0.702233	0.997519	0.007444	0.131514	0.48139	0.734491	0.980149	0.37469	0.363184	0.012407	0.337469	0.513648	0.744417	0.997519	0.369727
0.277027	0.405405	0.317568	0.258503	0.163265	0.285714	0.033784	0.175676	0.371622	0.662162	0.986486	0.013514	0.358108	0.533784	0.783784	0.993243	0.006757	0.202703	0.506757	0.716216	1	0.445946	0.256757	0.297297	0.081633	0.054422	0.013605	0.006757	0.216216	0.452703	0.797297	1	0.175676	0.263514	0.689189	0.824324	0.97973	0.060811	0.128378	0.5	0.594595	0.668919	0.655405	0.244898	0.060811	0.331081	0.540541	0.716216	0.97973	0.358108
0.346154	0.380342	0.273504	0.257511	0.141631	0.214592	0.012821	0.264957	0.5	0.773504	1	0.008547	0.209402	0.482906	0.717949	0.987179	0.004274	0.25641	0.504274	0.752137	0.978632	0.487179	0.376068	0.136752	0.137339	0.034335	0	0.004274	0.149573	0.542735	0.777778	1	0.094017	0.418803	0.581197	0.803419	0.961538	0.017094	0.166667	0.200855	0.24359	0.487179	0.521368	0.351931	0.017094	0.277778	0.517094	0.752137	0.965812	0.405983
0.364621	0.3213	0.314079	0.246377	0.257246	0.202899	0.01083	0.288809	0.498195	0.761733	1	0.00722	0.209386	0.527076	0.765343	0.981949	0.00361	0.220217	0.433213	0.696751	0.98556	0.285199	0.267148	0.447653	0.068841	0.061594	0.01087	0.00361	0.129964	0.451264	0.722022	1	0.028881	0.148014	0.314079	0.711191	0.99278	0.039711	0.407942	0.537906	0.750903	0.960289	0.472924	0.478261	0.025271	0.231047	0.527076	0.743682	0.98556	0.303249
0.453634	0.310777	0.235589	0.271357	0.201005	0.150754	0.010025	0.275689	0.516291	0.769424	0.994987	0.005013	0.172932	0.403509	0.724311	0.987469	0.002506	0.295739	0.546366	0.744361	1	0.536341	0.037594	0.426065	0.022613	0.082915	0.002513	0.002506	0.150376	0.365915	0.558897	1	0.152882	0.157895	0.699248	0.949875	0.974937	0.007519	0.398496	0.654135	0.814536	0.969925	0.37594	0.38191	0.007519	0.303258	0.528822	0.719298	0.992481	0.35589
0.409722	0.194444	0.395833	0.160839	0.307692	0.202797	0.013889	0.236111	0.458333	0.756944	1	0.048611	0.291667	0.548611	0.791667	0.979167	0.006944	0.215278	0.472222	0.673611	0.986111	0.361111	0.298611	0.340278	0.118881	0.076923	0.006993	0.006944	0.222222	0.451389	0.6875	1	0.041667	0.277778	0.5	0.722222	0.993056	0.069444	0.145833	0.534722	0.791667	0.909722	0.513889	0.48951	0.020833	0.215278	0.486111	0.729167	0.986111	0.201389
0.384333	0.328029	0.287638	0.275735	0.207108	0.208333	0.004896	0.26683	0.531212	0.780906	0.998776	0.002448	0.253366	0.495716	0.74541	1	0.001224	0.215422	0.451652	0.682987	0.986536	0.485924	0.21175	0.302326	0.077206	0.055147	0.003676	0.001224	0.244798	0.517748	0.831089	1	0.063647	0.179927	0.392901	0.784578	0.877601	0.003672	0.312118	0.559364	0.70257	0.964504	0.485924	0.333333	0.003672	0.255814	0.455324	0.679315	0.986536	0.334149
0.250755	0.425982	0.323263	0.187879	0.178788	0.272727	0.006042	0.259819	0.528701	0.776435	1	0.012085	0.205438	0.471299	0.703927	0.996979	0.003021	0.265861	0.486405	0.746224	0.978852	0.601208	0.256798	0.141994	0.075758	0.039394	0.00303	0.003021	0.175227	0.519637	0.773414	1	0.012085	0.274924	0.410876	0.628399	0.930514	0.033233	0.335347	0.483384	0.734139	0.978852	0.577039	0.345455	0.012085	0.232628	0.438066	0.673716	0.978852	0.444109
0.413793	0.275862	0.310345	0.207921	0.287129	0.20297	0.014778	0.231527	0.497537	0.763547	0.995074	0.068966	0.261084	0.502463	0.729064	1	0.004926	0.226601	0.463054	0.714286	0.955665	0.433498	0.438424	0.128079	0.118812	0.039604	0	0.004926	0.285714	0.576355	0.837438	1	0.009852	0.305419	0.463054	0.635468	0.881773	0.078818	0.103448	0.241379	0.660099	0.955665	0.428571	0.435644	0.014778	0.236453	0.44335	0.674877	0.8867	0.295567
0.411576	0.315113	0.273312	0.287097	0.251613	0.151613	0.009646	0.263666	0.530547	0.768489	1	0.061093	0.289389	0.540193	0.810289	0.990354	0.003215	0.202572	0.427653	0.620579	0.974277	0.421222	0.102894	0.475884	0.03871	0.090323	0	0.003215	0.273312	0.633441	0.864952	1	0.366559	0.623794	0.675241	0.951768	0.980707	0.006431	0.205788	0.405145	0.527331	0.823151	0.430868	0.341935	0.006431	0.212219	0.401929	0.569132	0.980707	0.315113
0.310959	0.394521	0.294521	0.163237	0.234568	0.266118	0.008219	0.19589	0.471233	0.753425	0.99863	0.00274	0.243836	0.49863	0.736986	1	0.00137	0.289041	0.515068	0.754795	0.994521	0.656164	0.1	0.243836	0.043896	0.082305	0	0.00137	0.242466	0.478082	0.689041	1	0.09863	0.161644	0.324658	0.9	0.994521	0.061644	0.347945	0.663014	0.794521	0.975342	0.673973	0.208505	0.015068	0.410959	0.583562	0.757534	0.991781	0.415068
0.331288	0.323108	0.345603	0.196721	0.221311	0.239754	0.00818	0.155419	0.453988	0.744376	0.997955	0.00409	0.267894	0.476483	0.762781	1	0.002045	0.306748	0.535787	0.725971	0.989775	0.486708	0.167689	0.345603	0.063525	0.071721	0.006148	0.002045	0.128834	0.321063	0.650307	1	0.014315	0.425358	0.631902	0.764826	0.9182	0.01227	0.382413	0.560327	0.785276	0.99182	0.523517	0.364754	0.006135	0.333333	0.525562	0.766871	0.97955	0.359918
0.355789	0.322105	0.322105	0.202532	0.21097	0.225738	0.012632	0.256842	0.425263	0.648421	0.997895	0.004211	0.261053	0.616842	0.829474	1	0.002105	0.214737	0.507368	0.745263	0.983158	0.456842	0.168421	0.374737	0.07173	0.037975	0	0.002105	0.208421	0.646316	0.831579	1	0.056842	0.635789	0.749474	0.863158	0.972632	0.008421	0.271579	0.366316	0.458947	0.593684	0.477895	0.434599	0.012632	0.267368	0.585263	0.785263	0.978947	0.351579
0.351351	0.316953	0.331695	0.184729	0.268473	0.23399	0.004914	0.206388	0.481572	0.788698	0.995086	0.007371	0.289926	0.498771	0.724816	0.980344	0.002457	0.2457	0.501229	0.746929	1	0.339066	0.223587	0.437346	0.078818	0.083744	0	0.002457	0.277641	0.459459	0.756757	1	0.012285	0.181818	0.375921	0.513514	0.95086	0.04914	0.299754	0.609337	0.798526	0.997543	0.592138	0.438424	0.007371	0.287469	0.4914	0.722359	0.997543	0.316953
0.30084	0.431933	0.267227	0.208754	0.171717	0.239057	0.003361	0.193277	0.411765	0.69916	0.991597	0.005042	0.315966	0.584874	0.828571	0.998319	0.001681	0.231933	0.445378	0.721008	1	0.531092	0.2	0.268908	0.089226	0.055556	0.001684	0.001681	0.242017	0.559664	0.709244	1	0.05042	0.215126	0.388235	0.630252	0.986555	0.028571	0.321008	0.52437	0.852101	0.963025	0.563025	0.350168	0.018487	0.305882	0.584874	0.764706	0.993277	0.411765
0.378378	0.27027	0.351351	0.19661	0.281356	0.216949	0.02027	0.216216	0.422297	0.702703	1	0.006757	0.266892	0.547297	0.777027	0.993243	0.003378	0.256757	0.510135	0.760135	0.996622	0.405405	0.081081	0.513514	0.044068	0.084746	0.016949	0.003378	0.27027	0.570946	0.783784	1	0.256757	0.287162	0.47973	0.625	0.77027	0.023649	0.182432	0.5	0.746622	0.989865	0.459459	0.508475	0.010135	0.280405	0.570946	0.760135	0.986486	0.320946
0.294393	0.364486	0.341121	0.215962	0.201878	0.215962	0.023364	0.275701	0.495327	0.761682	1	0.009346	0.233645	0.415888	0.654206	0.953271	0.004673	0.196262	0.565421	0.82243	0.995327	0.537383	0.140187	0.32243	0.065728	0.065728	0	0.004673	0.261682	0.397196	0.64486	1	0.018692	0.046729	0.598131	0.752336	0.934579	0.11215	0.214953	0.565421	0.799065	0.990654	0.514019	0.356808	0.018692	0.317757	0.523364	0.757009	0.990654	0.364486
0.592357	0.269639	0.138004	0.261702	0.123404	0.095745	0.006369	0.350318	0.58811	0.781316	1	0.004246	0.195329	0.358811	0.677282	0.995754	0.002123	0.142251	0.284501	0.666667	0.997877	0.783439	0.063694	0.152866	0.025532	0.038298	0	0.002123	0.390658	0.592357	0.796178	1	0.220807	0.278132	0.316348	0.36518	0.974522	0.014862	0.133758	0.171975	0.333333	0.855626	0.195329	0.187234	0.010616	0.127389	0.286624	0.403397	0.993631	0.346072
0.387931	0.344828	0.267241	0.26087	0.156522	0.147826	0.017241	0.189655	0.387931	0.715517	0.974138	0.025862	0.284483	0.612069	0.853448	1	0.008621	0.232759	0.413793	0.560345	0.844828	0.715517	0.077586	0.206897	0.052174	0.052174	0	0.008621	0.284483	0.603448	0.784483	1	0.362069	0.517241	0.534483	0.948276	0.974138	0.155172	0.198276	0.25	0.431034	0.482759	0.232759	0.173913	0.094828	0.318966	0.422414	0.5	0.767241	0.37931
0.376344	0.290323	0.333333	0.219424	0.26259	0.172662	0.007168	0.25448	0.494624	0.727599	0.978495	0.02509	0.243728	0.544803	0.777778	1	0.003584	0.240143	0.458781	0.709677	0.97491	0.387097	0.168459	0.444444	0.05036	0.086331	0	0.003584	0.193548	0.455197	0.698925	1	0.16129	0.258065	0.390681	0.591398	0.681004	0.007168	0.225806	0.498208	0.799283	0.960573	0.55914	0.417266	0.017921	0.243728	0.46595	0.666667	0.97491	0.297491
0.294404	0.389294	0.316302	0.209756	0.185366	0.24878	0.009732	0.182482	0.440389	0.705596	0.995134	0.007299	0.26764	0.515815	0.768856	0.997567	0.002433	0.248175	0.513382	0.781022	1	0.547445	0.184915	0.26764	0.063415	0.058537	0	0.002433	0.23601	0.540146	0.746959	1	0.082725	0.22871	0.403893	0.579075	0.885645	0.043796	0.277372	0.549878	0.79562	0.987835	0.532847	0.4	0.012165	0.291971	0.586375	0.798054	0.992701	0.386861
0.359629	0.322506	0.317865	0.22093	0.202326	0.216279	0.013921	0.243619	0.468677	0.807425	0.986079	0.00464	0.276102	0.522042	0.721578	0.99536	0.00232	0.234339	0.470998	0.700696	1	0.461717	0.092807	0.445476	0.037209	0.088372	0.004651	0.00232	0.211137	0.477958	0.791183	1	0.006961	0.090487	0.25522	0.802784	0.911833	0.109049	0.354988	0.531323	0.712297	0.99536	0.554524	0.344186	0.009281	0.315545	0.524362	0.712297	0.990719	0.345708
0.322034	0.40113	0.276836	0.244318	0.210227	0.227273	0.016949	0.231638	0.451977	0.655367	0.977401	0.011299	0.248588	0.548023	0.779661	1	0.00565	0.214689	0.457627	0.762712	0.943503	0.40678	0.259887	0.333333	0.096591	0.0625	0.017045	0.00565	0.169492	0.519774	0.762712	1	0.112994	0.276836	0.615819	0.841808	0.926554	0.045198	0.355932	0.440678	0.649718	0.949153	0.40113	0.477273	0.028249	0.248588	0.497175	0.723164	0.949153	0.355932
0.337971	0.437101	0.224928	0.262761	0.166473	0.185615	0.002319	0.290435	0.536232	0.754783	0.998841	0.001159	0.201159	0.418551	0.713623	1	0.00058	0.31942	0.584348	0.766377	0.99942	0.683478	0.045217	0.271304	0.029002	0.056845	0.00232	0.00058	0.195362	0.413913	0.66087	1	0.008696	0.217971	0.312464	0.358261	0.678261	0.014493	0.53913	0.706667	0.903768	0.998841	0.388986	0.360789	0.008696	0.256232	0.569275	0.791884	0.99942	0.443478
0.289931	0.465278	0.244792	0.21913	0.154783	0.24	0.005208	0.239583	0.522569	0.690972	1	0.003472	0.237847	0.475694	0.776042	0.996528	0.001736	0.286458	0.503472	0.722222	0.994792	0.642361	0.090278	0.267361	0.046957	0.085217	0.001739	0.001736	0.220486	0.510417	0.805556	1	0.128472	0.407986	0.479167	0.654514	0.723958	0.026042	0.256944	0.505208	0.670139	0.96875	0.449653	0.389565	0.017361	0.256944	0.529514	0.774306	0.994792	0.472222
0.401015	0.284264	0.314721	0.214286	0.25	0.173469	0.015228	0.253807	0.527919	0.761421	1	0.010152	0.208122	0.446701	0.715736	0.994924	0.005076	0.243655	0.502538	0.741117	0.984772	0.467005	0.187817	0.345178	0.066327	0.066327	0.02551	0.005076	0.152284	0.522843	0.766497	1	0.071066	0.274112	0.614213	0.939086	0.989848	0.040609	0.324873	0.426396	0.720812	0.918782	0.502538	0.408163	0.020305	0.329949	0.502538	0.746193	0.984772	0.279188
0.368421	0.359649	0.27193	0.20354	0.230088	0.20354	0.026316	0.254386	0.491228	0.807018	1	0.017544	0.219298	0.429825	0.622807	0.95614	0.008772	0.166667	0.587719	0.798246	0.964912	0.359649	0.27193	0.368421	0.106195	0.070796	0.017699	0.008772	0.175439	0.464912	0.763158	1	0.04386	0.105263	0.394737	0.578947	0.850877	0.184211	0.263158	0.666667	0.780702	0.95614	0.429825	0.389381	0.052632	0.236842	0.473684	0.666667	0.938596	0.315789
0.405714	0.434286	0.16	0.270115	0.086207	0.143678	0.022857	0.217143	0.451429	0.651429	0.977143	0.011429	0.285714	0.491429	0.805714	0.988571	0.005714	0.148571	0.657143	0.788571	1	0.782857	0.04	0.177143	0.034483	0.068966	0	0.005714	0.274286	0.474286	0.748571	1	0.034286	0.034286	0.045714	0.782857	0.794286	0.137143	0.194286	0.662857	0.708571	0.948571	0.257143	0.275862	0.028571	0.228571	0.662857	0.805714	0.965714	0.422857
0.329365	0.39881	0.271825	0.272366	0.192843	0.182903	0.005952	0.230159	0.468254	0.755952	0.998016	0.019841	0.202381	0.448413	0.71627	1	0.001984	0.35119	0.559524	0.785714	0.996032	0.464286	0.073413	0.462302	0.027833	0.087475	0.003976	0.001984	0.130952	0.339286	0.666667	1	0.599206	0.662698	0.839286	0.89881	0.974206	0.007937	0.349206	0.511905	0.75	0.996032	0.376984	0.290258	0.003968	0.515873	0.678571	0.847222	0.996032	0.44246
0.388158	0.282895	0.328947	0.208791	0.261538	0.18022	0.004386	0.256579	0.508772	0.780702	0.997807	0.017544	0.22807	0.482456	0.717105	1	0.002193	0.258772	0.486842	0.734649	0.995614	0.385965	0.184211	0.429825	0.076923	0.09011	0.002198	0.002193	0.298246	0.513158	0.758772	1	0.100877	0.254386	0.526316	0.774123	0.949561	0.006579	0.199561	0.440789	0.701754	0.989035	0.541667	0.408791	0.006579	0.267544	0.482456	0.717105	0.995614	0.285088
0.453782	0.369748	0.176471	0.297335	0.15007	0.134642	0.004202	0.2493	0.415966	0.689076	1	0.007003	0.184874	0.54902	0.809524	0.995798	0.001401	0.383754	0.561625	0.746499	0.998599	0.661064	0.180672	0.158263	0.091164	0.057504	0.004208	0.001401	0.205882	0.396359	0.731092	1	0.004202	0.39916	0.588235	0.77451	0.906162	0.110644	0.455182	0.619048	0.7507	0.910364	0.364146	0.2777	0.005602	0.464986	0.645658	0.858543	0.985994	0.432773
0.475936	0.304813	0.219251	0.311828	0.225806	0.11828	0.048128	0.304813	0.545455	0.721925	0.994652	0.016043	0.26738	0.55615	0.780749	0.973262	0.005348	0.13369	0.342246	0.459893	1	0.641711	0.251337	0.106952	0.075269	0.021505	0	0.005348	0.395722	0.663102	0.823529	1	0.074866	0.144385	0.224599	0.374332	0.994652	0.02139	0.042781	0.454545	0.481283	0.508021	0.417112	0.387097	0.016043	0.203209	0.427807	0.727273	0.946524	0.272727
0.352181	0.318255	0.329564	0.223301	0.221683	0.197411	0.008078	0.232633	0.516963	0.77706	1	0.006462	0.197092	0.439418	0.736672	0.996769	0.001616	0.311793	0.53958	0.731826	0.983845	0.49273	0.163166	0.344103	0.063107	0.079288	0.004854	0.001616	0.159935	0.336026	0.647819	1	0.009693	0.308562	0.568659	0.728595	0.886914	0.077544	0.415186	0.599354	0.817447	0.995153	0.508885	0.355987	0.009693	0.345719	0.523425	0.731826	0.988691	0.360258
0.312775	0.396476	0.290749	0.212389	0.199115	0.230088	0.008811	0.277533	0.506608	0.722467	1	0.013216	0.154185	0.475771	0.762115	0.995595	0.004405	0.286344	0.502203	0.726872	0.969163	0.348018	0.140969	0.511013	0.048673	0.084071	0.004425	0.004405	0.105727	0.30837	0.585903	1	0.013216	0.321586	0.444934	0.678414	0.726872	0.176211	0.365639	0.621145	0.85022	0.977974	0.488987	0.433628	0.013216	0.30837	0.515419	0.731278	0.951542	0.365639
0.375	0.267857	0.357143	0.16129	0.265233	0.261649	0.007143	0.192857	0.428571	0.703571	1	0.032143	0.282143	0.546429	0.764286	0.996429	0.003571	0.275	0.510714	0.75	0.992857	0.271429	0.096429	0.632143	0.032258	0.082437	0.003584	0.003571	0.139286	0.510714	0.775	1	0.010714	0.039286	0.078571	0.107143	0.175	0.142857	0.357143	0.564286	0.767857	0.985714	0.517857	0.394265	0.010714	0.271429	0.510714	0.739286	0.975	0.271429
0.390805	0.329502	0.279693	0.2	0.257692	0.176923	0.019157	0.256705	0.521073	0.789272	1	0.007663	0.295019	0.544061	0.785441	0.965517	0.003831	0.206897	0.436782	0.643678	0.996169	0.452107	0.164751	0.383142	0.05	0.065385	0.011538	0.003831	0.344828	0.670498	0.816092	1	0.122605	0.172414	0.318008	0.643678	0.704981	0.015326	0.229885	0.394636	0.555556	0.992337	0.40613	0.4	0.02682	0.214559	0.436782	0.609195	0.969349	0.360153
0.341394	0.364154	0.294452	0.225071	0.225071	0.202279	0.002845	0.273115	0.529161	0.773826	0.998578	0.004267	0.213371	0.416785	0.661451	0.997155	0.001422	0.295875	0.587482	0.776671	1	0.473684	0.027027	0.499289	0.011396	0.105413	0.002849	0.001422	0.220484	0.357041	0.485064	1	0.00569	0.009957	0.153627	0.290185	0.524893	0.029872	0.517781	0.678521	0.83926	0.99431	0.573257	0.430199	0.00569	0.294452	0.519203	0.739687	0.99431	0.366999
0.332031	0.332031	0.335938	0.227451	0.235294	0.243137	0.011719	0.214844	0.4375	0.730469	0.988281	0.019531	0.292969	0.539062	0.71875	0.996094	0.003906	0.246094	0.5	0.761719	1	0.460938	0.292969	0.246094	0.12549	0.062745	0	0.003906	0.230469	0.441406	0.699219	1	0.164062	0.304688	0.503906	0.761719	0.941406	0.050781	0.125	0.53125	0.8125	0.988281	0.5	0.423529	0.015625	0.324219	0.511719	0.761719	0.992188	0.382812
0.387387	0.288288	0.324324	0.245455	0.263636	0.227273	0.027027	0.189189	0.405405	0.720721	0.981982	0.036036	0.198198	0.504505	0.765766	0.990991	0.009009	0.351351	0.495495	0.711712	1	0.504505	0.243243	0.252252	0.090909	0.054545	0	0.009009	0.18018	0.351351	0.81982	1	0.099099	0.279279	0.558559	0.675676	0.936937	0.045045	0.396396	0.459459	0.738739	0.801802	0.405405	0.436364	0.045045	0.306306	0.531532	0.684685	0.972973	0.288288
0.273141	0.494689	0.23217	0.226444	0.12614	0.215805	0.030349	0.209408	0.488619	0.707132	0.995448	0.003035	0.227618	0.479514	0.748103	1	0.001517	0.329287	0.52959	0.772382	0.996965	0.637329	0.098634	0.264036	0.042553	0.066869	0.00304	0.001517	0.283763	0.626707	0.792109	1	0.353566	0.421851	0.518968	0.925645	0.996965	0.007587	0.162367	0.29742	0.447648	0.989378	0.538695	0.319149	0.010622	0.330804	0.581184	0.763278	0.998483	0.517451
0.4	0.372222	0.227778	0.27933	0.206704	0.167598	0.011111	0.211111	0.455556	0.705556	1	0.05	0.261111	0.444444	0.755556	0.988889	0.005556	0.377778	0.577778	0.738889	0.961111	0.561111	0.166667	0.272222	0.061453	0.061453	0.01676	0.005556	0.216667	0.361111	0.522222	1	0.094444	0.533333	0.744444	0.8	0.933333	0.016667	0.444444	0.65	0.866667	0.988889	0.361111	0.379888	0.033333	0.338889	0.466667	0.727778	0.933333	0.377778
0.299465	0.358289	0.342246	0.22043	0.204301	0.241935	0.037433	0.294118	0.44385	0.721925	1	0.016043	0.176471	0.582888	0.780749	0.994652	0.005348	0.278075	0.486631	0.73262	0.946524	0.44385	0.427807	0.128342	0.155914	0.037634	0.005376	0.005348	0.299465	0.604278	0.84492	1	0.02139	0.315508	0.481283	0.663102	0.935829	0.085561	0.112299	0.256684	0.28877	0.823529	0.449198	0.473118	0.02139	0.278075	0.481283	0.716578	0.941176	0.379679
0.357827	0.359425	0.282748	0.2416	0.2176	0.1936	0.004792	0.204473	0.448882	0.720447	1	0.003195	0.21246	0.535144	0.765176	0.995208	0.001597	0.338658	0.539936	0.755591	0.998403	0.507987	0.159744	0.332268	0.0592	0.0752	0.0016	0.001597	0.13738	0.436102	0.670927	1	0.094249	0.246006	0.472843	0.803514	0.86901	0.047923	0.383387	0.619808	0.753994	0.996805	0.48722	0.4128	0.01278	0.27476	0.528754	0.782748	0.996805	0.394569
0.356917	0.427666	0.215417	0.27907	0.150106	0.174419	0.002112	0.192186	0.472017	0.731785	0.998944	0.006336	0.270327	0.589229	0.797254	1	0.001056	0.275607	0.43717	0.599789	0.997888	0.644139	0.105597	0.250264	0.039112	0.053911	0.003171	0.001056	0.210137	0.618796	0.829989	1	0.020063	0.372756	0.481521	0.582893	0.965153	0.040127	0.277719	0.407603	0.560718	0.800422	0.475185	0.325581	0.003168	0.319958	0.501584	0.739176	0.986272	0.451954
0.262887	0.371134	0.365979	0.207254	0.207254	0.284974	0.030928	0.195876	0.515464	0.747423	0.958763	0.020619	0.273196	0.5	0.783505	1	0.005155	0.231959	0.469072	0.71134	0.979381	0.417526	0.463918	0.118557	0.124352	0.041451	0	0.005155	0.283505	0.582474	0.824742	1	0.010309	0.324742	0.510309	0.675258	0.93299	0.082474	0.103093	0.242268	0.273196	0.984536	0.453608	0.487047	0.015464	0.262887	0.474227	0.695876	0.938144	0.386598
0.403756	0.333333	0.262911	0.259434	0.254717	0.15566	0.014085	0.267606	0.492958	0.741784	1	0.00939	0.183099	0.408451	0.690141	0.995305	0.004695	0.319249	0.58216	0.779343	0.985915	0.488263	0.173709	0.338028	0.061321	0.070755	0.023585	0.004695	0.15493	0.516432	0.723005	1	0.230047	0.483568	0.638498	0.943662	0.99061	0.037559	0.328638	0.42723	0.737089	0.924883	0.460094	0.424528	0.018779	0.342723	0.502347	0.70892	0.985915	0.328638
0.396226	0.306604	0.29717	0.218009	0.274882	0.146919	0.014151	0.240566	0.528302	0.740566	0.995283	0.009434	0.169811	0.481132	0.745283	1	0.004717	0.283019	0.471698	0.716981	0.966981	0.466981	0.150943	0.382075	0.056872	0.066351	0.028436	0.004717	0.146226	0.495283	0.768868	1	0.20283	0.264151	0.575472	0.896226	0.981132	0.037736	0.311321	0.419811	0.712264	0.948113	0.457547	0.417062	0.018868	0.325472	0.476415	0.698113	0.981132	0.287736
0.29918	0.393443	0.307377	0.255144	0.160494	0.263374	0.028689	0.204918	0.512295	0.77459	1	0.008197	0.282787	0.528689	0.766393	0.987705	0.004098	0.229508	0.430328	0.639344	0.995902	0.368852	0.102459	0.528689	0.032922	0.074074	0	0.004098	0.168033	0.454918	0.778689	1	0.418033	0.75	0.77459	0.827869	0.864754	0.032787	0.237705	0.483607	0.622951	0.959016	0.483607	0.353909	0.012295	0.237705	0.487705	0.672131	0.995902	0.393443
0.435233	0.259067	0.305699	0.203125	0.291667	0.192708	0.015544	0.259067	0.502591	0.772021	1	0.010363	0.176166	0.435233	0.694301	0.984456	0.005181	0.248705	0.507772	0.73057	0.994819	0.455959	0.450777	0.093264	0.125	0.03125	0	0.005181	0.274611	0.580311	0.854922	1	0.015544	0.305699	0.492228	0.65285	0.906736	0.07772	0.093264	0.227979	0.248705	0.683938	0.42487	0.458333	0.025907	0.284974	0.46114	0.694301	0.911917	0.26943
0.323308	0.390977	0.285714	0.242938	0.190207	0.220339	0.005639	0.266917	0.537594	0.802632	0.99812	0.003759	0.25188	0.520677	0.755639	0.996241	0.00188	0.214286	0.43985	0.648496	1	0.479323	0.06015	0.460526	0.016949	0.073446	0.00565	0.00188	0.257519	0.612782	0.843985	1	0.058271	0.071429	0.191729	0.389098	0.639098	0.005639	0.31203	0.477444	0.644737	0.994361	0.488722	0.308851	0.007519	0.219925	0.43609	0.62782	0.992481	0.413534
0.364379	0.349673	0.285948	0.216039	0.198036	0.225859	0.009804	0.19281	0.45098	0.727124	1	0.006536	0.267974	0.485294	0.735294	0.998366	0.001634	0.346405	0.54902	0.767974	0.99183	0.612745	0.199346	0.187908	0.086743	0.040917	0.008183	0.001634	0.230392	0.455882	0.699346	1	0.003268	0.220588	0.53268	0.76634	0.978758	0.062092	0.401961	0.573529	0.79085	0.955882	0.485294	0.356792	0.004902	0.218954	0.441176	0.736928	0.986928	0.362745
0.460526	0.263158	0.276316	0.238411	0.298013	0.15894	0.013158	0.25	0.480263	0.703947	1	0.072368	0.263158	0.539474	0.717105	0.993421	0.006579	0.190789	0.532895	0.782895	0.967105	0.348684	0.309211	0.342105	0.125828	0.059603	0.006623	0.006579	0.144737	0.559211	0.75	1	0.013158	0.236842	0.605263	0.875	0.973684	0.059211	0.315789	0.401316	0.638158	0.822368	0.401316	0.476821	0.019737	0.203947	0.513158	0.723684	0.967105	0.25
0.371648	0.310345	0.318008	0.191939	0.25144	0.211132	0.007663	0.249042	0.503831	0.798851	1	0.003831	0.226054	0.522989	0.747126	0.994253	0.001916	0.254789	0.471264	0.691571	0.992337	0.519157	0.116858	0.363985	0.047985	0.06334	0.005758	0.001916	0.283525	0.613027	0.862069	1	0.113027	0.237548	0.632184	0.747126	0.952107	0.005747	0.176245	0.371648	0.570881	0.954023	0.534483	0.349328	0.009579	0.254789	0.434866	0.641762	0.984674	0.333333
0.387781	0.284289	0.32793	0.208489	0.278402	0.179775	0.002494	0.253117	0.508728	0.760599	0.998753	0.004988	0.219451	0.445137	0.735661	1	0.001247	0.260599	0.516209	0.744389	0.997506	0.456359	0.249377	0.294264	0.099875	0.057428	0.002497	0.001247	0.23192	0.483791	0.745636	1	0.038653	0.170823	0.415212	0.78803	0.997506	0.006234	0.322943	0.573566	0.761845	0.991272	0.562344	0.39201	0.003741	0.269327	0.472569	0.738155	0.997506	0.336658
0.311649	0.461422	0.226929	0.254545	0.14697	0.215152	0.003026	0.267776	0.476551	0.74584	1	0.004539	0.249622	0.529501	0.747352	0.995461	0.001513	0.23298	0.459909	0.738275	0.996974	0.744327	0.125567	0.130106	0.062121	0.040909	0.001515	0.001513	0.29652	0.538578	0.742814	1	0.006051	0.231467	0.461422	0.856278	0.984871	0.055976	0.18003	0.26475	0.670197	0.910741	0.443268	0.336364	0.006051	0.22239	0.512859	0.771558	0.996974	0.458396
0.398305	0.29661	0.305085	0.205128	0.273504	0.25641	0.016949	0.161017	0.432203	0.711864	0.991525	0.025424	0.322034	0.542373	0.822034	0.974576	0.008475	0.228814	0.449153	0.745763	1	0.313559	0.228814	0.457627	0.08547	0.068376	0	0.008475	0.262712	0.508475	0.754237	1	0.271186	0.313559	0.398305	0.491525	0.847458	0.025424	0.127119	0.59322	0.70339	0.957627	0.457627	0.324786	0.042373	0.29661	0.483051	0.779661	0.983051	0.305085
0.384712	0.270677	0.344612	0.205772	0.292346	0.200753	0.007519	0.263158	0.501253	0.756892	1	0.005013	0.236842	0.483709	0.734336	0.994987	0.001253	0.240602	0.508772	0.746867	0.997494	0.463659	0.241855	0.294486	0.105395	0.055207	0.002509	0.001253	0.23183	0.483709	0.739348	1	0.038847	0.197995	0.41604	0.795739	0.997494	0.006266	0.319549	0.541353	0.703008	0.992481	0.570175	0.409034	0.003759	0.264411	0.47619	0.741855	0.997494	0.303258
0.333797	0.358832	0.307371	0.236769	0.192201	0.218663	0.004172	0.194715	0.458971	0.732962	0.997218	0.006954	0.260083	0.521558	0.755216	1	0.001391	0.2879	0.50904	0.752434	0.993046	0.381085	0.155772	0.463143	0.054318	0.090529	0.001393	0.001391	0.235049	0.499305	0.713491	1	0.004172	0.299026	0.478442	0.564673	0.958275	0.022253	0.21975	0.495132	0.781641	0.993046	0.561892	0.342618	0.005563	0.301808	0.522949	0.751043	0.993046	0.371349
0.52809	0.191011	0.280899	0.159091	0.284091	0.159091	0.033708	0.247191	0.516854	0.764045	1	0.022472	0.168539	0.337079	0.573034	0.876404	0.011236	0.325843	0.494382	0.752809	0.977528	0.247191	0	0.752809	0	0.090909	0	0.011236	0.191011	0.258427	0.550562	1	0	0	0	0	0	0.05618	0.314607	0.505618	0.752809	0.955056	0.393258	0.431818	0.089888	0.314607	0.483146	0.707865	0.977528	0.157303
0.405063	0.348101	0.246835	0.282092	0.196513	0.169572	0.003165	0.261076	0.52057	0.787975	0.995253	0.015823	0.280063	0.572785	0.781646	1	0.001582	0.199367	0.39557	0.620253	0.998418	0.530063	0.183544	0.286392	0.07607	0.050713	0.006339	0.001582	0.273734	0.617089	0.848101	1	0.007911	0.129747	0.27057	0.504747	0.993671	0.123418	0.299051	0.427215	0.661392	0.898734	0.463608	0.399366	0.006329	0.223101	0.43038	0.670886	0.993671	0.375
0.423529	0.294118	0.282353	0.261905	0.238095	0.178571	0.023529	0.2	0.494118	0.705882	0.988235	0.070588	0.188235	0.435294	0.729412	1	0.011765	0.305882	0.517647	0.788235	0.964706	0.623529	0.035294	0.341176	0.047619	0.071429	0	0.011765	0.152941	0.423529	0.811765	1	0.235294	0.235294	0.235294	0.247059	0.458824	0.305882	0.376471	0.635294	0.717647	0.905882	0.4	0.452381	0.129412	0.329412	0.6	0.764706	0.964706	0.258824
0.391304	0.271739	0.336957	0.191257	0.300546	0.174863	0.016304	0.206522	0.375	0.744565	0.994565	0.043478	0.358696	0.554348	0.733696	1	0.005435	0.184783	0.532609	0.73913	0.98913	0.347826	0.086957	0.565217	0.054645	0.087432	0	0.005435	0.211957	0.505435	0.836957	1	0.119565	0.75	0.798913	0.820652	0.869565	0.01087	0.244565	0.418478	0.625	0.945652	0.445652	0.502732	0.027174	0.266304	0.516304	0.690217	0.978261	0.304348
0.472727	0.218182	0.309091	0.211009	0.366972	0.119266	0.018182	0.281818	0.545455	0.790909	1	0.027273	0.109091	0.372727	0.581818	0.990909	0.009091	0.263636	0.527273	0.763636	0.954545	0.381818	0.290909	0.327273	0.110092	0.055046	0.018349	0.009091	0.190909	0.536364	0.809091	1	0.036364	0.118182	0.418182	0.609091	0.9	0.2	0.272727	0.527273	0.763636	0.872727	0.463636	0.422018	0.036364	0.181818	0.490909	0.709091	0.909091	0.190909
0.323529	0.433824	0.242647	0.276753	0.151292	0.214022	0.011029	0.183824	0.463235	0.720588	0.996324	0.007353	0.216912	0.518382	0.779412	1	0.003676	0.330882	0.503676	0.713235	0.974265	0.363971	0.099265	0.536765	0.02952	0.103321	0	0.003676	0.102941	0.279412	0.709559	1	0.507353	0.801471	0.841912	0.875	0.900735	0.051471	0.327206	0.496324	0.661765	0.963235	0.452206	0.309963	0.018382	0.3125	0.481618	0.669118	0.966912	0.470588
0.33945	0.376147	0.284404	0.225806	0.202765	0.262673	0.041284	0.302752	0.518349	0.779817	1	0.009174	0.233945	0.509174	0.729358	0.986239	0.004587	0.188073	0.46789	0.692661	0.90367	0.440367	0.426606	0.133028	0.119816	0.046083	0	0.004587	0.311927	0.642202	0.848624	1	0.013761	0.288991	0.440367	0.605505	0.834862	0.077982	0.105505	0.233945	0.880734	0.958716	0.422018	0.460829	0.018349	0.270642	0.440367	0.669725	0.894495	0.357798
0.372093	0.302326	0.325581	0.341176	0.211765	0.176471	0.034884	0.244186	0.523256	0.732558	1	0.023256	0.162791	0.395349	0.651163	0.988372	0.011628	0.313953	0.534884	0.755814	0.965116	0.348837	0.244186	0.406977	0.094118	0.047059	0	0.011628	0.244186	0.418605	0.906977	1	0.046512	0.337209	0.44186	0.5	0.604651	0.081395	0.162791	0.686047	0.790698	0.895349	0.430233	0.423529	0.046512	0.290698	0.453488	0.686047	0.965116	0.337209
0.381526	0.313253	0.305221	0.245968	0.225806	0.205645	0.012048	0.228916	0.445783	0.722892	1	0.008032	0.248996	0.502008	0.702811	0.951807	0.004016	0.269076	0.514056	0.783133	0.995984	0.457831	0.301205	0.240964	0.129032	0.064516	0	0.004016	0.257028	0.485944	0.714859	1	0.116466	0.261044	0.465863	0.73494	0.935743	0.008032	0.084337	0.51004	0.795181	0.987952	0.46988	0.41129	0.02008	0.309237	0.502008	0.738956	0.987952	0.349398
0.357013	0.417122	0.225865	0.279197	0.156934	0.184307	0.007286	0.313297	0.546448	0.757741	1	0.005464	0.205829	0.477231	0.695811	0.992714	0.001821	0.233151	0.45173	0.797814	0.998179	0.71949	0.061931	0.218579	0.043796	0.069343	0.007299	0.001821	0.198543	0.48816	0.708561	1	0.116576	0.227687	0.318761	0.68306	0.994536	0.005464	0.418944	0.557377	0.899818	0.969035	0.433515	0.39781	0.010929	0.213115	0.473588	0.766849	0.994536	0.420765
0.310734	0.449153	0.240113	0.246459	0.144476	0.229462	0.011299	0.288136	0.545198	0.740113	0.99435	0.00565	0.180791	0.432203	0.757062	0.988701	0.002825	0.327684	0.522599	0.725989	1	0.615819	0.186441	0.19774	0.073654	0.045326	0	0.002825	0.158192	0.381356	0.793785	1	0.149718	0.426554	0.536723	0.677966	0.813559	0.262712	0.403955	0.632768	0.757062	0.963277	0.548023	0.322946	0.008475	0.206215	0.488701	0.748588	0.997175	0.440678
0.355362	0.397756	0.246883	0.267166	0.168539	0.179775	0.013716	0.278055	0.586035	0.811721	1	0.002494	0.225686	0.498753	0.766833	0.993766	0.001247	0.23192	0.405237	0.620948	0.997506	0.490025	0.117207	0.392768	0.052434	0.082397	0.002497	0.001247	0.238155	0.567332	0.812968	1	0.125935	0.286783	0.413965	0.509975	0.845387	0.03616	0.256858	0.517456	0.682045	0.997506	0.4202	0.337079	0.004988	0.216958	0.395262	0.584788	0.976309	0.413965
0.414894	0.212766	0.37234	0.193548	0.354839	0.150538	0.031915	0.159574	0.478723	0.723404	1	0.170213	0.265957	0.489362	0.755319	0.957447	0.010638	0.212766	0.468085	0.744681	0.93617	0.425532	0.574468	0	0.172043	0	0	0.010638	0.234043	0.5	0.744681	1	0.031915	0.265957	0.468085	0.659574	0.93617	0	0	0	0	0	0.425532	0.387097	0.042553	0.297872	0.542553	0.840426	0.946809	0.191489
0.346304	0.451362	0.202335	0.269531	0.140625	0.167969	0.011673	0.256809	0.490272	0.766537	1	0.007782	0.303502	0.548638	0.801556	0.996109	0.003891	0.124514	0.420233	0.603113	0.856031	0.470817	0.151751	0.377432	0.070312	0.085938	0	0.003891	0.29572	0.513619	0.836576	1	0.015564	0.124514	0.175097	0.276265	0.828794	0.062257	0.412451	0.622568	0.731518	0.980545	0.396887	0.335938	0.019455	0.206226	0.420233	0.634241	0.964981	0.466926
0.445545	0.277228	0.277228	0.25	0.26	0.11	0.019802	0.247525	0.534653	0.772277	1	0.029703	0.277228	0.435644	0.663366	0.980198	0.009901	0.217822	0.425743	0.752475	0.910891	0.366337	0.306931	0.326733	0.11	0.05	0.01	0.009901	0.326733	0.475248	0.80198	1	0.039604	0.09901	0.49505	0.623762	0.920792	0.158416	0.227723	0.306931	0.752475	0.871287	0.475248	0.42	0.039604	0.227723	0.49505	0.722772	0.930693	0.29703
0.336	0.4192	0.2448	0.258013	0.152244	0.189103	0.0144	0.2976	0.5424	0.7664	0.9984	0.0032	0.2576	0.592	0.8224	1	0.0016	0.2096	0.3584	0.5344	0.9408	0.5872	0.1152	0.2976	0.041667	0.076923	0.003205	0.0016	0.2896	0.6848	0.8432	1	0.1216	0.2576	0.4016	0.5264	0.6048	0.016	0.1872	0.3648	0.536	0.9952	0.4032	0.307692	0.0192	0.2176	0.3776	0.5568	0.976	0.4192
0.365482	0.286802	0.347716	0.190597	0.287166	0.205845	0.002538	0.255076	0.517766	0.738579	0.998731	0.005076	0.239848	0.472081	0.756345	0.993655	0.001269	0.244924	0.496193	0.743655	1	0.468274	0.238579	0.293147	0.105464	0.062262	0.003812	0.001269	0.204315	0.44797	0.733503	1	0.03934	0.248731	0.423858	0.813452	0.998731	0.006345	0.322335	0.576142	0.706853	0.991117	0.567259	0.404066	0.003807	0.261421	0.475888	0.742386	0.997462	0.319797
0.403846	0.25641	0.339744	0.167742	0.258065	0.180645	0.019231	0.25641	0.551282	0.788462	0.99359	0.012821	0.185897	0.455128	0.74359	0.974359	0.00641	0.24359	0.423077	0.647436	1	0.333333	0.089744	0.576923	0.03871	0.090323	0	0.00641	0.083333	0.365385	0.717949	1	0.461538	0.474359	0.5	0.538462	0.576923	0.134615	0.288462	0.615385	0.788462	0.974359	0.455128	0.451613	0.044872	0.275641	0.544872	0.75	0.987179	0.217949
0.300752	0.345865	0.353383	0.234848	0.204545	0.257576	0.037594	0.270677	0.466165	0.684211	0.924812	0.045113	0.225564	0.578947	0.774436	1	0.007519	0.210526	0.473684	0.766917	0.992481	0.398496	0.330827	0.270677	0.143939	0.037879	0.007576	0.007519	0.338346	0.548872	0.714286	1	0.18797	0.451128	0.593985	0.819549	0.992481	0.045113	0.105263	0.240602	0.308271	0.917293	0.458647	0.409091	0.037594	0.233083	0.488722	0.789474	0.992481	0.323308
0.353312	0.312303	0.334385	0.205696	0.231013	0.205696	0.009464	0.246057	0.545741	0.788644	0.990536	0.006309	0.217666	0.476341	0.712934	0.996845	0.003155	0.26183	0.495268	0.722397	1	0.432177	0.173502	0.394322	0.06962	0.082278	0.012658	0.003155	0.208202	0.492114	0.776025	1	0.009464	0.11041	0.523659	0.687697	0.990536	0.07571	0.290221	0.422713	0.766562	0.987382	0.570978	0.35443	0.012618	0.264984	0.501577	0.690852	0.993691	0.29653
0.325714	0.379048	0.295238	0.232824	0.192748	0.221374	0.011429	0.268571	0.48	0.805714	1	0.00381	0.241905	0.554286	0.779048	0.986667	0.001905	0.198095	0.441905	0.641905	0.998095	0.466667	0.07619	0.457143	0.028626	0.078244	0.005725	0.001905	0.262857	0.617143	0.84381	1	0.059048	0.171429	0.220952	0.598095	0.986667	0.005714	0.314286	0.48	0.645714	0.99619	0.525714	0.320611	0.007619	0.234286	0.481905	0.666667	0.99619	0.417143
0.3509	0.312339	0.336761	0.20592	0.243243	0.221364	0.006427	0.258355	0.51671	0.760925	1	0.005141	0.235219	0.48329	0.736504	0.997429	0.001285	0.22108	0.488432	0.733933	0.998715	0.471722	0.22365	0.304627	0.095238	0.059202	0.005148	0.001285	0.24036	0.456298	0.74036	1	0.041131	0.152956	0.494859	0.818766	0.998715	0.006427	0.327763	0.537275	0.706941	0.992288	0.569409	0.42471	0.003856	0.236504	0.474293	0.744216	0.998715	0.347044
0.40625	0.260417	0.333333	0.162304	0.272251	0.172775	0.010417	0.260417	0.546875	0.755208	1	0.020833	0.208333	0.484375	0.765625	0.96875	0.005208	0.234375	0.473958	0.682292	0.989583	0.395833	0.411458	0.192708	0.146597	0.031414	0	0.005208	0.260417	0.604167	0.848958	1	0.015625	0.145833	0.453125	0.640625	0.953125	0.317708	0.359375	0.40625	0.786458	0.838542	0.4375	0.450262	0.03125	0.348958	0.479167	0.640625	0.942708	0.229167
0.301587	0.465608	0.232804	0.245583	0.130742	0.242049	0.003527	0.243386	0.530864	0.763668	1	0.005291	0.229277	0.446208	0.744268	0.998236	0.001764	0.326279	0.552028	0.723104	0.957672	0.679012	0.119929	0.201058	0.060071	0.053004	0	0.001764	0.296296	0.479718	0.797178	1	0.008818	0.522046	0.601411	0.723104	0.809524	0.012346	0.223986	0.287478	0.700176	0.885362	0.573192	0.279152	0.007055	0.291005	0.481481	0.768959	0.987654	0.433862
0.310954	0.374558	0.314488	0.237589	0.202128	0.237589	0.010601	0.24735	0.477032	0.713781	0.985866	0.053004	0.257951	0.45583	0.717314	0.989399	0.003534	0.219081	0.565371	0.805654	1	0.540636	0.130742	0.328622	0.074468	0.088652	0.003546	0.003534	0.268551	0.424028	0.685512	1	0.09894	0.144876	0.597173	0.798587	0.957597	0.007067	0.219081	0.547703	0.749117	0.992933	0.501767	0.404255	0.007067	0.325088	0.501767	0.763251	0.996466	0.363958
0.37037	0.34321	0.28642	0.24505	0.200495	0.207921	0.012346	0.259259	0.45679	0.745679	0.995062	0.017284	0.2	0.488889	0.730864	1	0.002469	0.296296	0.535802	0.77037	0.97037	0.592593	0.14321	0.264198	0.061881	0.061881	0.002475	0.002469	0.2	0.365432	0.68642	1	0.004938	0.219753	0.590123	0.859259	0.940741	0.032099	0.412346	0.548148	0.738272	0.851852	0.444444	0.351485	0.004938	0.28642	0.550617	0.740741	0.97037	0.375309
0.351171	0.392977	0.255853	0.234506	0.20268	0.201005	0.003344	0.22408	0.466555	0.759197	1	0.008361	0.29097	0.5301	0.744147	0.994983	0.001672	0.207358	0.493311	0.729097	0.988294	0.525084	0.22408	0.250836	0.092127	0.045226	0.001675	0.001672	0.282609	0.538462	0.747492	1	0.005017	0.204013	0.468227	0.704013	0.906355	0.025084	0.217391	0.505017	0.780936	0.939799	0.436455	0.38861	0.006689	0.252508	0.510033	0.72408	0.989967	0.391304
0.374251	0.405689	0.22006	0.278861	0.173913	0.164918	0.002994	0.223054	0.450599	0.732036	0.997006	0.004491	0.303892	0.570359	0.775449	0.982036	0.001497	0.226048	0.47006	0.702096	1	0.637725	0.088323	0.273952	0.049475	0.076462	0.004498	0.001497	0.241018	0.519461	0.784431	1	0.073353	0.176647	0.321856	0.642216	0.859281	0.019461	0.278443	0.511976	0.738024	0.991018	0.362275	0.377811	0.008982	0.320359	0.501497	0.714072	0.986527	0.387725
0.448276	0.364532	0.187192	0.337171	0.143092	0.157895	0.004926	0.228243	0.382594	0.650246	0.995074	0.003284	0.188834	0.472906	0.727422	1	0.001642	0.546798	0.692939	0.863711	0.996716	0.663383	0.085386	0.251232	0.03125	0.067434	0.004934	0.001642	0.183908	0.349754	0.617406	1	0.047619	0.614122	0.707718	0.821018	0.906404	0.029557	0.535304	0.668309	0.885057	0.995074	0.308703	0.213816	0.00821	0.579639	0.706076	0.850575	0.99179	0.425287
0.345397	0.398899	0.255704	0.258268	0.174803	0.219685	0.001574	0.250197	0.442958	0.804091	0.998426	0.00236	0.270653	0.536585	0.734854	1	0.000787	0.203777	0.488592	0.704957	0.993706	0.70417	0.060582	0.235248	0.037795	0.059843	0.00315	0.000787	0.338316	0.594807	0.795437	1	0.04878	0.399685	0.449253	0.641227	0.994493	0.001574	0.087333	0.20535	0.390244	0.976397	0.40834	0.370079	0.00236	0.284815	0.535012	0.738788	0.993706	0.422502
0.201258	0.553459	0.245283	0.177215	0.082278	0.265823	0.018868	0.18239	0.27044	0.383648	1	0.012579	0.345912	0.540881	0.748428	0.987421	0.006289	0.257862	0.572327	0.767296	0.968553	0.754717	0.012579	0.232704	0.012658	0.025316	0	0.006289	0.433962	0.622642	0.811321	1	0.069182	0.069182	0.069182	0.069182	0.075472	0.113208	0.188679	0.245283	0.301887	0.36478	0.679245	0.291139	0.025157	0.358491	0.610063	0.786164	0.968553	0.54717
0.412346	0.353086	0.234568	0.277228	0.173267	0.163366	0.012346	0.283951	0.451852	0.725926	0.997531	0.004938	0.209877	0.503704	0.676543	0.992593	0.002469	0.22963	0.612346	0.849383	1	0.632099	0.120988	0.246914	0.049505	0.064356	0	0.002469	0.197531	0.454321	0.634568	1	0.130864	0.651852	0.765432	0.881481	0.965432	0.069136	0.293827	0.592593	0.819753	0.995062	0.360494	0.321782	0.007407	0.219753	0.562963	0.77284	0.990123	0.404938
0.434447	0.349614	0.215938	0.292453	0.190395	0.160377	0.001714	0.27078	0.520137	0.772065	1	0.005998	0.24593	0.507284	0.712939	0.999143	0.000857	0.191088	0.429306	0.731791	0.997429	0.651243	0.126821	0.221937	0.060034	0.066895	0.005146	0.000857	0.275921	0.497858	0.724079	1	0.007712	0.130249	0.379606	0.682948	0.968295	0.004284	0.264781	0.649529	0.786632	0.996572	0.311054	0.346484	0.003428	0.208226	0.463582	0.744644	0.997429	0.401885
0.357955	0.306818	0.335227	0.245714	0.245714	0.211429	0.017045	0.232955	0.471591	0.647727	0.965909	0.028409	0.267045	0.539773	0.8125	0.988636	0.005682	0.198864	0.494318	0.755682	1	0.431818	0.306818	0.261364	0.142857	0.062857	0.005714	0.005682	0.369318	0.585227	0.721591	1	0.130682	0.323864	0.431818	0.846591	0.994318	0.022727	0.079545	0.210227	0.5625	0.9375	0.448864	0.422857	0.022727	0.221591	0.579545	0.818182	0.994318	0.284091
0.337705	0.311475	0.35082	0.203947	0.223684	0.256579	0.009836	0.206557	0.488525	0.786885	0.996721	0.006557	0.262295	0.491803	0.718033	0.990164	0.003279	0.255738	0.498361	0.72459	1	0.468852	0.265574	0.265574	0.092105	0.052632	0	0.003279	0.229508	0.422951	0.704918	1	0.019672	0.2	0.459016	0.678689	0.816393	0.029508	0.35082	0.518033	0.885246	0.957377	0.534426	0.355263	0.022951	0.285246	0.491803	0.72459	0.983607	0.370492
0.343023	0.488372	0.168605	0.303207	0.139942	0.107872	0.008721	0.203488	0.436047	0.630814	0.994186	0.005814	0.284884	0.659884	0.822674	1	0.002907	0.247093	0.415698	0.534884	0.947674	0.712209	0.168605	0.119186	0.061224	0.03207	0.002915	0.002907	0.194767	0.642442	0.819767	1	0.165698	0.27907	0.375	0.517442	0.613372	0.162791	0.223837	0.331395	0.459302	0.630814	0.514535	0.268222	0.046512	0.40407	0.697674	0.825581	0.994186	0.488372
0.325991	0.348018	0.325991	0.230088	0.199115	0.238938	0.030837	0.246696	0.506608	0.69163	1	0.008811	0.198238	0.471366	0.740088	0.995595	0.004405	0.312775	0.53304	0.770925	0.991189	0.577093	0.229075	0.193833	0.075221	0.048673	0.013274	0.004405	0.176211	0.471366	0.69163	1	0.105727	0.365639	0.453744	0.784141	0.995595	0.264317	0.30837	0.546256	0.92511	0.977974	0.471366	0.415929	0.017621	0.361233	0.568282	0.806167	0.995595	0.321586
0.37013	0.272727	0.357143	0.117647	0.300654	0.24183	0.012987	0.318182	0.487013	0.662338	0.961039	0.038961	0.188312	0.461039	0.720779	1	0.006494	0.220779	0.532468	0.811688	0.993506	0.337662	0.298701	0.363636	0.117647	0.078431	0.013072	0.006494	0.175325	0.577922	0.766234	1	0.032468	0.25974	0.623377	0.883117	0.980519	0.012987	0.311688	0.402597	0.493506	0.824675	0.396104	0.470588	0.032468	0.220779	0.545455	0.779221	0.980519	0.272727
0.294671	0.46395	0.241379	0.27044	0.147799	0.213836	0.009404	0.188088	0.470219	0.717868	1	0.00627	0.200627	0.45768	0.755486	0.996865	0.003135	0.360502	0.570533	0.777429	0.978056	0.489028	0.153605	0.357367	0.044025	0.069182	0	0.003135	0.122257	0.341693	0.69906	1	0.275862	0.423197	0.485893	0.658307	0.739812	0.184953	0.369906	0.586207	0.830721	0.968652	0.485893	0.358491	0.012539	0.322884	0.526646	0.702194	0.968652	0.460815
0.405694	0.362989	0.231317	0.3	0.142857	0.192857	0.02847	0.217082	0.455516	0.686833	0.989324	0.010676	0.24911	0.494662	0.754448	0.978648	0.003559	0.256228	0.604982	0.800712	1	0.587189	0.124555	0.288256	0.057143	0.078571	0	0.003559	0.30605	0.47331	0.711744	1	0.007117	0.601423	0.697509	0.814947	0.978648	0.042705	0.11032	0.252669	0.654804	0.918149	0.320285	0.328571	0.007117	0.256228	0.654804	0.818505	0.992883	0.359431
0.308029	0.39854	0.293431	0.230994	0.185673	0.219298	0.013139	0.143066	0.420438	0.686131	1	0.00292	0.306569	0.563504	0.807299	0.99708	0.00146	0.277372	0.458394	0.712409	0.941606	0.519708	0.141606	0.338686	0.054094	0.068713	0.004386	0.00146	0.134307	0.464234	0.805839	1	0.005839	0.347445	0.490511	0.648175	0.916788	0.159124	0.332847	0.543066	0.731387	0.90219	0.50073	0.345029	0.00438	0.29927	0.510949	0.722628	0.979562	0.445255
0.321053	0.373684	0.305263	0.253968	0.216931	0.222222	0.015789	0.189474	0.484211	0.757895	1	0.010526	0.263158	0.531579	0.784211	0.984211	0.005263	0.242105	0.473684	0.678947	0.994737	0.310526	0.031579	0.657895	0.010582	0.126984	0	0.005263	0.236842	0.531579	0.863158	1	0.968421	0.968421	0.978947	0.984211	0.994737	0.047368	0.221053	0.473684	0.684211	0.915789	0.521053	0.412698	0.042105	0.294737	0.5	0.694737	0.994737	0.415789
0.315018	0.43956	0.245421	0.294118	0.154412	0.1875	0.007326	0.21978	0.424908	0.695971	0.981685	0.010989	0.227106	0.567766	0.81685	1	0.003663	0.249084	0.472527	0.699634	0.989011	0.626374	0.113553	0.260073	0.036765	0.051471	0	0.003663	0.186813	0.520147	0.842491	1	0.054945	0.527473	0.630037	0.688645	0.791209	0.091575	0.289377	0.380952	0.575092	0.74359	0.347985	0.352941	0.018315	0.201465	0.538462	0.699634	0.989011	0.428571
0.425197	0.326772	0.248031	0.252964	0.209486	0.150198	0.007874	0.26378	0.507874	0.818898	1	0.023622	0.299213	0.551181	0.755906	0.996063	0.003937	0.177165	0.401575	0.574803	0.968504	0.472441	0.122047	0.405512	0.047431	0.079051	0.007905	0.003937	0.358268	0.673228	0.838583	1	0.047244	0.070866	0.42126	0.543307	0.582677	0.011811	0.204724	0.397638	0.649606	0.933071	0.385827	0.332016	0.035433	0.153543	0.34252	0.547244	0.968504	0.346457
0.275641	0.474359	0.25	0.283871	0.141935	0.2	0.025641	0.166667	0.50641	0.75641	0.99359	0.019231	0.282051	0.532051	0.807692	1	0.00641	0.198718	0.435897	0.602564	0.846154	0.583333	0.108974	0.307692	0.032258	0.045161	0.006452	0.00641	0.230769	0.378205	0.852564	1	0.185897	0.205128	0.423077	0.448718	0.685897	0.076923	0.480769	0.557692	0.75641	0.833333	0.423077	0.322581	0.051282	0.365385	0.5	0.660256	0.903846	0.467949
0.365678	0.401168	0.233154	0.269663	0.186067	0.174831	0.002246	0.252022	0.498203	0.749775	0.999102	0.000898	0.234052	0.464061	0.72956	1	0.000449	0.28257	0.570979	0.789757	0.990117	0.649146	0.119946	0.230907	0.054382	0.059775	0.006742	0.000449	0.240791	0.486074	0.730907	1	0.021114	0.375562	0.59434	0.709793	0.969901	0.002695	0.224618	0.466307	0.761456	0.993261	0.367475	0.343371	0.001348	0.268643	0.592992	0.784367	0.990117	0.427673
0.351211	0.356401	0.292388	0.2513	0.187175	0.202773	0.00346	0.193772	0.456747	0.721453	1	0.019031	0.276817	0.49654	0.757785	0.991349	0.00173	0.283737	0.527682	0.766436	0.99827	0.432526	0.16782	0.399654	0.062392	0.07279	0.003466	0.00173	0.207612	0.423875	0.717993	1	0.00692	0.415225	0.645329	0.771626	0.99654	0.034602	0.259516	0.487889	0.749135	0.970588	0.531142	0.315425	0.00519	0.32526	0.508651	0.738754	0.99827	0.382353
0.375635	0.340102	0.284264	0.259542	0.201018	0.198473	0.010152	0.258883	0.535533	0.769036	1	0.005076	0.261421	0.5	0.753807	0.997462	0.002538	0.218274	0.431472	0.71066	0.982234	0.469543	0.192893	0.337563	0.076336	0.061069	0	0.002538	0.243655	0.520305	0.769036	1	0.19797	0.286802	0.510152	0.624365	0.845178	0.01269	0.126904	0.423858	0.741117	0.98731	0.505076	0.340967	0.025381	0.263959	0.461929	0.692893	0.959391	0.36802
0.478972	0.292056	0.228972	0.250585	0.208431	0.140515	0.004673	0.189252	0.462617	0.768692	0.997664	0.007009	0.271028	0.514019	0.754673	1	0.002336	0.324766	0.518692	0.670561	0.995327	0.446262	0.044393	0.509346	0.023419	0.084309	0.004684	0.002336	0.175234	0.352804	0.764019	1	0.018692	0.093458	0.376168	0.983645	0.995327	0.044393	0.385514	0.542056	0.698598	0.922897	0.317757	0.388759	0.018692	0.287383	0.504673	0.623832	0.995327	0.366822
0.358779	0.305344	0.335878	0.223077	0.238462	0.246154	0.076336	0.335878	0.519084	0.778626	0.938931	0.022901	0.19084	0.412214	0.755725	1	0.007634	0.21374	0.442748	0.687023	0.992366	0.458015	0.137405	0.40458	0.046154	0.092308	0	0.007634	0.19084	0.351145	0.748092	1	0.259542	0.282443	0.381679	0.412214	0.694656	0.076336	0.465649	0.564885	0.78626	0.89313	0.419847	0.323077	0.053435	0.29771	0.503817	0.679389	0.954198	0.274809
0.427123	0.328264	0.244613	0.269036	0.168782	0.170051	0.010139	0.188847	0.564005	0.81749	1	0.002535	0.237009	0.47782	0.716096	0.996198	0.001267	0.30545	0.453739	0.65019	0.988593	0.528517	0.105196	0.366286	0.040609	0.098985	0.005076	0.001267	0.157161	0.466413	0.813688	1	0.007605	0.343473	0.471483	0.590621	0.752852	0.021546	0.328264	0.543726	0.727503	0.975919	0.387833	0.294416	0.003802	0.304183	0.448669	0.619772	0.993663	0.380228
0.34647	0.372742	0.280788	0.236842	0.192434	0.220395	0.019704	0.295567	0.481117	0.761905	1	0.003284	0.203612	0.533662	0.737274	0.996716	0.001642	0.226601	0.492611	0.748768	0.998358	0.543514	0.178982	0.277504	0.074013	0.050987	0.001645	0.001642	0.247947	0.54023	0.750411	1	0.003284	0.159278	0.303777	0.500821	0.996716	0.060755	0.356322	0.587849	0.891626	0.986864	0.513957	0.332237	0.003284	0.269294	0.563218	0.740558	0.995074	0.3711
0.40724	0.276018	0.316742	0.245455	0.240909	0.154545	0.00905	0.280543	0.579186	0.773756	1	0.054299	0.20362	0.502262	0.760181	0.995475	0.004525	0.226244	0.420814	0.633484	0.9819	0.316742	0.095023	0.588235	0.040909	0.086364	0.004545	0.004525	0.153846	0.447964	0.755656	1	0.117647	0.773756	0.828054	0.850679	0.886878	0.0181	0.235294	0.470588	0.633484	0.986425	0.502262	0.363636	0.0181	0.21267	0.434389	0.628959	0.9819	0.244344
0.403642	0.29742	0.298938	0.237082	0.212766	0.18541	0.004552	0.2261	0.482549	0.737481	0.990895	0.003035	0.233687	0.508346	0.778452	0.998483	0.001517	0.291351	0.505311	0.740516	1	0.509863	0.171472	0.318665	0.072948	0.06079	0	0.001517	0.224583	0.465857	0.770865	1	0.013657	0.233687	0.405159	0.585736	0.907436	0.047041	0.294385	0.599393	0.889226	0.992413	0.491654	0.325228	0.01214	0.280728	0.566009	0.799697	0.996965	0.306525
0.319088	0.413105	0.267806	0.205714	0.182857	0.222857	0.017094	0.299145	0.501425	0.672365	0.980057	0.005698	0.262108	0.509972	0.792023	0.991453	0.002849	0.19943	0.444444	0.698006	1	0.723647	0.193732	0.082621	0.085714	0.034286	0.005714	0.002849	0.296296	0.561254	0.777778	1	0.079772	0.148148	0.267806	0.358974	0.917379	0.008547	0.45584	0.481481	0.940171	0.962963	0.452991	0.308571	0.014245	0.239316	0.501425	0.774929	0.982906	0.421652
0.439535	0.32093	0.239535	0.261072	0.188811	0.181818	0.009302	0.25814	0.462791	0.748837	1	0.004651	0.181395	0.495349	0.723256	0.983721	0.002326	0.313953	0.54186	0.751163	0.953488	0.595349	0.15814	0.246512	0.072261	0.095571	0.002331	0.002326	0.197674	0.446512	0.755814	1	0.07907	0.506977	0.632558	0.772093	0.951163	0.016279	0.267442	0.372093	0.704651	0.990698	0.323256	0.344988	0.05814	0.27907	0.532558	0.723256	0.97907	0.330233
0.450867	0.236994	0.312139	0.209302	0.290698	0.174419	0.011561	0.277457	0.485549	0.83237	0.99422	0.075145	0.225434	0.531792	0.728324	0.988439	0.00578	0.202312	0.456647	0.65896	1	0.364162	0.283237	0.352601	0.122093	0.063953	0.005814	0.00578	0.138728	0.508671	0.722543	1	0.011561	0.213873	0.531792	0.751445	0.843931	0.052023	0.289017	0.375723	0.589595	0.976879	0.352601	0.44186	0.017341	0.179191	0.456647	0.65896	0.930636	0.265896
0.300173	0.473183	0.226644	0.231169	0.137662	0.227706	0.004325	0.345156	0.58737	0.799308	0.999135	0.00173	0.207612	0.372837	0.643599	0.991349	0.000865	0.360727	0.634948	0.803633	1	0.758651	0.08045	0.1609	0.029437	0.036364	0.001732	0.000865	0.200692	0.390138	0.579585	1	0.009516	0.705882	0.801038	0.872837	0.958478	0.079585	0.687716	0.787197	0.897924	0.987889	0.675606	0.245887	0.002595	0.219723	0.393599	0.690311	0.985294	0.525087
0.338983	0.345763	0.315254	0.221088	0.183673	0.248299	0.020339	0.257627	0.518644	0.779661	1	0.00678	0.213559	0.481356	0.701695	0.99322	0.00339	0.267797	0.491525	0.732203	0.983051	0.386441	0.166102	0.447458	0.047619	0.108844	0	0.00339	0.189831	0.464407	0.701695	1	0.159322	0.311864	0.4	0.59661	0.684746	0.013559	0.257627	0.505085	0.80339	0.979661	0.535593	0.408163	0.023729	0.240678	0.454237	0.657627	0.983051	0.349153
0.432432	0.256757	0.310811	0.191781	0.246575	0.150685	0.040541	0.27027	0.554054	0.72973	0.945946	0.027027	0.148649	0.391892	0.837838	1	0.013514	0.175676	0.472973	0.608108	0.851351	0.351351	0.27027	0.378378	0.082192	0.054795	0	0.013514	0.27027	0.716216	0.905405	1	0.310811	0.608108	0.675676	0.810811	0.878378	0.067568	0.148649	0.243243	0.459459	0.554054	0.418919	0.356164	0.054054	0.162162	0.418919	0.608108	0.878378	0.27027
0.458993	0.316547	0.22446	0.244957	0.197406	0.161383	0.01295	0.351079	0.509353	0.776978	1	0.002878	0.230216	0.648921	0.808633	0.995683	0.001439	0.156835	0.332374	0.6	0.997122	0.447482	0.094964	0.457554	0.036023	0.056196	0.004323	0.001439	0.230216	0.72518	0.85036	1	0.004317	0.048921	0.146763	0.305036	0.789928	0.020144	0.374101	0.489209	0.602878	0.968345	0.261871	0.268012	0.005755	0.128058	0.277698	0.666187	0.905036	0.339568
0.30303	0.381313	0.315657	0.23038	0.235443	0.217722	0.005051	0.239899	0.479798	0.795455	0.997475	0.007576	0.234848	0.472222	0.709596	1	0.002525	0.262626	0.527778	0.755051	0.994949	0.363636	0.214646	0.421717	0.075949	0.081013	0	0.002525	0.300505	0.512626	0.805556	1	0.012626	0.141414	0.381313	0.517677	0.878788	0.04798	0.252525	0.580808	0.772727	0.989899	0.608586	0.410127	0.007576	0.282828	0.5	0.734848	0.994949	0.378788
0.34126	0.311534	0.347206	0.211905	0.264286	0.213095	0.003567	0.248514	0.483948	0.751486	0.995244	0.002378	0.241379	0.543401	0.776457	1	0.001189	0.250892	0.48038	0.709869	0.998811	0.454221	0.197384	0.348395	0.080952	0.085714	0.007143	0.001189	0.24019	0.487515	0.740785	1	0.005945	0.210464	0.428062	0.812128	0.902497	0.070155	0.262782	0.551724	0.758621	0.997622	0.521998	0.457143	0.004756	0.239001	0.488704	0.760999	0.998811	0.323424
0.306383	0.32766	0.365957	0.213675	0.230769	0.230769	0.029787	0.26383	0.582979	0.812766	0.987234	0.008511	0.238298	0.421277	0.689362	0.995745	0.004255	0.221277	0.493617	0.72766	1	0.438298	0.374468	0.187234	0.136752	0.051282	0.017094	0.004255	0.246809	0.468085	0.67234	1	0.008511	0.170213	0.331915	0.574468	0.804255	0.391489	0.719149	0.86383	0.919149	0.965957	0.561702	0.350427	0.008511	0.27234	0.510638	0.72766	0.948936	0.357447
0.333938	0.402904	0.263158	0.250909	0.158182	0.229091	0.012704	0.212341	0.508167	0.818512	1	0.00363	0.205082	0.442831	0.716878	0.99637	0.001815	0.321234	0.513612	0.718693	0.970962	0.502722	0.136116	0.361162	0.049091	0.074545	0.005455	0.001815	0.127042	0.366606	0.744102	1	0.168784	0.411978	0.560799	0.720508	0.811252	0.110708	0.346642	0.540835	0.814882	0.958258	0.473684	0.330909	0.005445	0.297641	0.470054	0.693285	0.990926	0.444646
0.369628	0.332378	0.297994	0.272989	0.264368	0.181034	0.005731	0.237822	0.472779	0.713467	1	0.011461	0.17765	0.484241	0.767908	0.991404	0.002865	0.332378	0.535817	0.744986	0.994269	0.541547	0.151862	0.30659	0.048851	0.077586	0.002874	0.002865	0.209169	0.424069	0.773639	1	0.191977	0.369628	0.441261	0.489971	0.908309	0.037249	0.234957	0.60745	0.796562	0.919771	0.484241	0.362069	0.031519	0.289398	0.512894	0.73639	0.985673	0.363897
0.31358	0.346914	0.339506	0.211372	0.236094	0.236094	0.002469	0.261728	0.541975	0.765432	0.998765	0.004938	0.249383	0.460494	0.720988	0.993827	0.001235	0.225926	0.507407	0.744444	1	0.465432	0.246914	0.287654	0.100124	0.053152	0.003708	0.001235	0.208642	0.488889	0.749383	1	0.039506	0.2	0.409877	0.748148	0.998765	0.006173	0.316049	0.565432	0.693827	0.990123	0.55679	0.407911	0.003704	0.245679	0.462963	0.737037	0.996296	0.380247
0.3711	0.417077	0.211823	0.291118	0.149671	0.179276	0.006568	0.244663	0.441708	0.71757	0.998358	0.003284	0.195402	0.44335	0.729064	0.996716	0.001642	0.45977	0.632184	0.793103	1	0.658456	0.119869	0.221675	0.03125	0.057566	0.008224	0.001642	0.167488	0.331691	0.622332	1	0.507389	0.640394	0.783251	0.876847	0.996716	0.006568	0.482759	0.632184	0.765189	0.950739	0.330049	0.223684	0.021346	0.536946	0.694581	0.834154	0.995074	0.431856
0.437956	0.321168	0.240876	0.323529	0.198529	0.132353	0.014599	0.291971	0.518248	0.781022	1	0.021898	0.182482	0.474453	0.70073	0.970803	0.007299	0.211679	0.459854	0.635036	0.934307	0.467153	0.211679	0.321168	0.088235	0.088235	0	0.007299	0.226277	0.459854	0.722628	1	0.036496	0.080292	0.489051	0.817518	0.890511	0.138686	0.29927	0.583942	0.664234	0.978102	0.386861	0.352941	0.036496	0.226277	0.452555	0.635036	0.934307	0.277372
0.385542	0.289157	0.325301	0.231707	0.256098	0.146341	0.072289	0.313253	0.554217	0.759036	0.927711	0.060241	0.349398	0.638554	0.915663	1	0.012048	0.144578	0.277108	0.518072	0.843373	0.385542	0.313253	0.301205	0.121951	0.04878	0	0.012048	0.313253	0.481928	0.903614	1	0.024096	0.084337	0.240964	0.349398	0.506024	0.53012	0.590361	0.662651	0.771084	0.855422	0.349398	0.414634	0.024096	0.168675	0.385542	0.518072	0.915663	0.301205
0.384516	0.27871	0.336774	0.222222	0.276486	0.189922	0.002581	0.267097	0.509677	0.752258	0.99871	0.005161	0.23871	0.487742	0.736774	1	0.00129	0.224516	0.494194	0.747097	0.997419	0.443871	0.255484	0.300645	0.104651	0.05814	0.003876	0.00129	0.207742	0.450323	0.734194	1	0.04129	0.206452	0.492903	0.809032	0.997419	0.006452	0.317419	0.543226	0.708387	0.990968	0.574194	0.408269	0.003871	0.258065	0.477419	0.745806	0.997419	0.287742
0.38125	0.425	0.19375	0.319415	0.14405	0.179541	0.008333	0.241667	0.522917	0.745833	0.997917	0.00625	0.24375	0.466667	0.785417	1	0.002083	0.2625	0.464583	0.689583	0.975	0.604167	0.122917	0.272917	0.056367	0.08977	0.002088	0.002083	0.2125	0.41875	0.7625	1	0.01875	0.139583	0.275	0.570833	0.70625	0.0375	0.460417	0.63125	0.79375	0.977083	0.466667	0.338205	0.01875	0.297917	0.535417	0.74375	0.985417	0.452083
0.295345	0.382825	0.32183	0.211245	0.200803	0.235341	0.002408	0.271268	0.540931	0.761637	1	0.00321	0.213483	0.446228	0.716693	0.999197	0.000803	0.29053	0.520867	0.764045	0.997592	0.475923	0.108347	0.41573	0.04257	0.079518	0.004016	0.000803	0.158909	0.385233	0.684591	1	0.004815	0.307384	0.509631	0.697432	0.869984	0.024077	0.373997	0.616372	0.843499	0.998395	0.521669	0.380723	0.005618	0.284109	0.516854	0.748796	0.998395	0.403692
0.403226	0.306452	0.290323	0.227642	0.211382	0.195122	0.024194	0.16129	0.427419	0.701613	0.991935	0.016129	0.233871	0.540323	0.741935	0.975806	0.008065	0.258065	0.556452	0.782258	1	0.274194	0	0.725806	0	0.081301	0	0.008065	0.177419	0.596774	0.741935	1	0	0	0	0	0	0.064516	0.290323	0.475806	0.709677	0.959677	0.427419	0.471545	0.032258	0.322581	0.524194	0.75	0.967742	0.25
0.35082	0.321311	0.327869	0.226974	0.246711	0.213816	0.013115	0.209836	0.459016	0.721311	0.996721	0.022951	0.288525	0.508197	0.708197	0.980328	0.003279	0.242623	0.514754	0.780328	1	0.52459	0.285246	0.190164	0.111842	0.039474	0.013158	0.003279	0.245902	0.465574	0.767213	1	0.006557	0.304918	0.563934	0.72459	0.954098	0.039344	0.098361	0.501639	0.806557	0.996721	0.537705	0.388158	0.009836	0.337705	0.511475	0.770492	0.990164	0.318033
0.364035	0.355263	0.280702	0.251101	0.220264	0.180617	0.008772	0.22807	0.52193	0.837719	1	0.013158	0.236842	0.508772	0.789474	0.982456	0.004386	0.263158	0.447368	0.635965	0.820175	0.438596	0.390351	0.171053	0.105727	0.052863	0	0.004386	0.289474	0.592105	0.807018	1	0.008772	0.276316	0.434211	0.578947	0.798246	0.065789	0.192982	0.600877	0.881579	0.986842	0.385965	0.414097	0.017544	0.245614	0.407895	0.614035	0.925439	0.407895
0.336283	0.323009	0.340708	0.195556	0.24	0.217778	0.00885	0.221239	0.575221	0.840708	0.986726	0.022124	0.247788	0.486726	0.712389	1	0.004425	0.243363	0.460177	0.681416	0.995575	0.438053	0.225664	0.336283	0.093333	0.066667	0.013333	0.004425	0.181416	0.433628	0.668142	1	0.026549	0.115044	0.393805	0.597345	0.99115	0.154867	0.345133	0.623894	0.849558	0.986726	0.561947	0.328889	0.017699	0.292035	0.482301	0.668142	0.99115	0.371681
0.367521	0.316239	0.316239	0.24339	0.232504	0.195179	0.002331	0.216006	0.483294	0.749029	0.993007	0.001554	0.227661	0.452991	0.71251	0.999223	0.000777	0.307692	0.556333	0.787102	1	0.477078	0.099456	0.423465	0.044323	0.081649	0.003888	0.000777	0.177933	0.401709	0.700078	1	0.027195	0.324786	0.540016	0.714064	0.995338	0.006216	0.346542	0.610723	0.836053	0.997669	0.503497	0.402799	0.003885	0.285936	0.531469	0.756022	0.998446	0.33411
0.372236	0.347666	0.280098	0.253383	0.212792	0.186962	0.002457	0.244472	0.493857	0.79484	1	0.004914	0.146192	0.416462	0.681818	0.996314	0.001229	0.371007	0.587224	0.771499	0.995086	0.514742	0.293612	0.191646	0.105781	0.04428	0	0.001229	0.157248	0.384521	0.65602	1	0.070025	0.457002	0.604423	0.739558	0.993857	0.004914	0.212531	0.363636	0.925061	0.985258	0.472973	0.378844	0.004914	0.359951	0.54914	0.753071	0.995086	0.388206
0.362218	0.402946	0.234835	0.296618	0.155247	0.187337	0.0026	0.282496	0.577123	0.790295	1	0.001733	0.22357	0.511265	0.761698	0.999133	0.000867	0.237435	0.422877	0.630849	0.966205	0.506066	0.116118	0.377816	0.049436	0.085863	0.004337	0.000867	0.185442	0.52513	0.793761	1	0.016464	0.292894	0.409879	0.681976	0.886482	0.003466	0.281629	0.541594	0.70104	0.988735	0.444541	0.348656	0.003466	0.218371	0.414211	0.665511	0.966205	0.443674
0.339623	0.372642	0.287736	0.251185	0.241706	0.189573	0.009434	0.212264	0.448113	0.764151	0.990566	0.04717	0.330189	0.504717	0.712264	1	0.004717	0.174528	0.518868	0.75	0.971698	0.537736	0.141509	0.320755	0.075829	0.066351	0	0.004717	0.264151	0.400943	0.688679	1	0.014151	0.066038	0.589623	0.731132	0.915094	0.09434	0.20283	0.556604	0.787736	0.976415	0.509434	0.369668	0.014151	0.34434	0.528302	0.768868	0.971698	0.40566
0.257426	0.445545	0.29703	0.18543	0.188742	0.251656	0.013201	0.29703	0.50495	0.815182	1	0.006601	0.20132	0.465347	0.722772	0.9967	0.0033	0.267327	0.524752	0.716172	0.990099	0.442244	0.171617	0.386139	0.05298	0.086093	0	0.0033	0.148515	0.425743	0.712871	1	0.026403	0.339934	0.481848	0.676568	0.762376	0.115512	0.306931	0.570957	0.848185	0.993399	0.521452	0.423841	0.023102	0.287129	0.50495	0.686469	0.986799	0.471947
0.375	0.291667	0.333333	0.197605	0.299401	0.209581	0.017857	0.25	0.52381	0.77381	1	0.029762	0.196429	0.428571	0.702381	0.958333	0.005952	0.279762	0.535714	0.755952	0.988095	0.404762	0.261905	0.333333	0.095808	0.05988	0.011976	0.005952	0.136905	0.404762	0.660714	1	0.089286	0.47619	0.720238	0.815476	0.892857	0.154762	0.25	0.505952	0.589286	0.982143	0.410714	0.431138	0.029762	0.279762	0.517857	0.702381	0.982143	0.27381
0.292994	0.388535	0.318471	0.214286	0.19898	0.279337	0.002548	0.264968	0.521019	0.728662	0.997452	0.005096	0.242038	0.490446	0.755414	1	0.001274	0.234395	0.487898	0.756688	0.996178	0.466242	0.263694	0.270064	0.118622	0.057398	0.003827	0.001274	0.203822	0.466242	0.721019	1	0.002548	0.257325	0.426752	0.807643	0.993631	0.006369	0.319745	0.541401	0.710828	0.984713	0.563057	0.423469	0.003822	0.266242	0.459873	0.704459	0.996178	0.383439
0.362069	0.333333	0.304598	0.208092	0.236994	0.219653	0.011494	0.281609	0.505747	0.775862	1	0.017241	0.195402	0.494253	0.729885	0.982759	0.005747	0.212644	0.442529	0.655172	0.988506	0.494253	0.097701	0.408046	0.034682	0.080925	0	0.005747	0.304598	0.477011	0.758621	1	0.327586	0.643678	0.666667	0.804598	0.833333	0.045977	0.183908	0.408046	0.563218	0.982759	0.385057	0.404624	0.017241	0.247126	0.511494	0.712644	0.971264	0.258621
0.375172	0.308966	0.315862	0.208564	0.243094	0.214088	0.004138	0.224828	0.526897	0.783448	1	0.002759	0.296552	0.503448	0.73931	0.995862	0.001379	0.216552	0.467586	0.704828	0.997241	0.475862	0.350345	0.173793	0.13674	0.029006	0.001381	0.001379	0.21931	0.422069	0.692414	1	0.004138	0.325517	0.517241	0.675862	0.995862	0.033103	0.147586	0.882759	0.928276	0.987586	0.49931	0.375691	0.008276	0.277241	0.503448	0.724138	0.997241	0.33931
0.360656	0.344262	0.295082	0.240132	0.220395	0.223684	0.019672	0.288525	0.521311	0.790164	0.996721	0.006557	0.17377	0.44918	0.714754	1	0.003279	0.268852	0.514754	0.737705	0.990164	0.42623	0.413115	0.160656	0.108553	0.055921	0.016447	0.003279	0.229508	0.504918	0.754098	1	0.101639	0.272131	0.527869	0.727869	0.977049	0.039344	0.07541	0.354098	0.622951	0.901639	0.455738	0.401316	0.04918	0.272131	0.481967	0.727869	0.990164	0.35082
0.299383	0.373457	0.32716	0.198142	0.198142	0.250774	0.006173	0.225309	0.518519	0.777778	0.990741	0.009259	0.259259	0.478395	0.712963	1	0.003086	0.231481	0.503086	0.75	0.993827	0.567901	0.197531	0.234568	0.086687	0.06192	0.012384	0.003086	0.287037	0.490741	0.759259	1	0.070988	0.268519	0.432099	0.567901	0.944444	0.021605	0.185185	0.62037	0.737654	0.885802	0.617284	0.315789	0.012346	0.253086	0.512346	0.731481	0.993827	0.376543
0.349315	0.303653	0.347032	0.19222	0.26087	0.185355	0.004566	0.260274	0.520548	0.757991	0.995434	0.011416	0.194064	0.477169	0.746575	1	0.002283	0.276256	0.486301	0.737443	0.997717	0.420091	0.196347	0.383562	0.070938	0.070938	0.006865	0.002283	0.180365	0.474886	0.780822	1	0.020548	0.321918	0.543379	0.762557	0.881279	0.077626	0.269406	0.465753	0.730594	0.954338	0.563927	0.338673	0.009132	0.255708	0.461187	0.737443	0.997717	0.305936
0.355372	0.297521	0.347107	0.204969	0.267081	0.186335	0.018595	0.229339	0.541322	0.791322	0.997934	0.004132	0.204545	0.42562	0.702479	1	0.002066	0.289256	0.506198	0.741736	0.995868	0.450413	0.173554	0.376033	0.066253	0.086957	0.004141	0.002066	0.130165	0.402893	0.719008	1	0.008264	0.419421	0.621901	0.762397	0.927686	0.115702	0.316116	0.52686	0.739669	0.993802	0.528926	0.356108	0.004132	0.318182	0.514463	0.764463	0.995868	0.340909
0.349345	0.355167	0.295488	0.247813	0.225948	0.186589	0.002911	0.269287	0.532751	0.761281	1	0.014556	0.243086	0.499272	0.742358	0.994178	0.001456	0.234352	0.462882	0.730713	0.998544	0.365357	0.211063	0.423581	0.102041	0.075802	0.005831	0.001456	0.259098	0.491994	0.820961	1	0.008734	0.206696	0.416303	0.88064	0.997089	0.032023	0.285298	0.540029	0.681223	0.925764	0.534207	0.393586	0.010189	0.247453	0.467249	0.69869	0.998544	0.378457
0.37	0.31	0.32	0.20202	0.262626	0.191919	0.1	0.24	0.47	0.69	0.98	0.03	0.21	0.53	0.83	1	0.01	0.22	0.41	0.68	0.97	0.46	0.54	0	0.181818	0	0	0.01	0.3	0.53	0.79	1	0.02	0.19	0.39	0.68	0.96	0	0	0	0	0	0.36	0.505051	0.02	0.2	0.42	0.7	0.97	0.24
0.295302	0.422819	0.281879	0.277027	0.168919	0.256757	0.073826	0.422819	0.590604	0.738255	0.986577	0.020134	0.161074	0.409396	0.758389	1	0.006711	0.234899	0.442953	0.697987	0.959732	0.61745	0.288591	0.09396	0.060811	0.02027	0.006757	0.006711	0.214765	0.510067	0.771812	1	0.33557	0.395973	0.503356	0.691275	0.818792	0.040268	0.053691	0.080537	0.825503	0.852349	0.33557	0.472973	0.040268	0.268456	0.456376	0.684564	0.926174	0.422819
0.341646	0.260599	0.397756	0.167291	0.259675	0.224719	0.002494	0.25187	0.507481	0.761845	0.996259	0.004988	0.24813	0.473815	0.716958	0.988778	0.001247	0.238155	0.508728	0.760599	1	0.470075	0.233167	0.296758	0.093633	0.053683	0.001248	0.001247	0.234414	0.456359	0.738155	1	0.037406	0.195761	0.418953	0.811721	0.992519	0.006234	0.317955	0.538653	0.697007	0.985037	0.573566	0.409488	0.003741	0.259352	0.471322	0.721945	0.997506	0.279302
0.386364	0.378788	0.234848	0.267176	0.160305	0.152672	0.037879	0.30303	0.560606	0.780303	0.992424	0.045455	0.25	0.537879	0.787879	1	0.007576	0.098485	0.310606	0.530303	0.833333	0.469697	0.19697	0.333333	0.061069	0.045802	0.015267	0.007576	0.295455	0.469697	0.878788	1	0.015152	0.212121	0.424242	0.5	0.818182	0.05303	0.128788	0.590909	0.674242	0.80303	0.310606	0.274809	0.022727	0.181818	0.416667	0.590909	0.863636	0.378788
0.364865	0.324324	0.310811	0.217687	0.238095	0.258503	0.040541	0.283784	0.533784	0.72973	1	0.02027	0.243243	0.459459	0.831081	0.993243	0.006757	0.175676	0.452703	0.662162	0.972973	0.432432	0.175676	0.391892	0.054422	0.068027	0	0.006757	0.358108	0.77027	0.878378	1	0.128378	0.162162	0.222973	0.317568	0.972973	0.033784	0.385135	0.533784	0.655405	0.756757	0.493243	0.408163	0.027027	0.162162	0.344595	0.621622	0.912162	0.324324
0.357143	0.295918	0.346939	0.201365	0.238908	0.228669	0.010204	0.27551	0.520408	0.778912	1	0.006803	0.214286	0.486395	0.690476	0.996599	0.003401	0.238095	0.493197	0.734694	0.989796	0.387755	0.166667	0.445578	0.047782	0.095563	0	0.003401	0.173469	0.442177	0.707483	1	0.180272	0.357143	0.455782	0.653061	0.741497	0.034014	0.241497	0.534014	0.833333	0.993197	0.540816	0.395904	0.02381	0.255102	0.486395	0.676871	0.989796	0.326531
0.352554	0.31631	0.331137	0.19637	0.239274	0.219472	0.003295	0.265239	0.518946	0.818781	0.998353	0.016474	0.243822	0.500824	0.708402	0.99341	0.001647	0.230643	0.469522	0.705107	1	0.490939	0.169687	0.339374	0.061056	0.064356	0.00495	0.001647	0.248764	0.52883	0.759473	1	0.031301	0.23888	0.444811	0.546952	0.869852	0.008237	0.261944	0.589786	0.820428	0.996705	0.439868	0.333333	0.011532	0.217463	0.500824	0.688633	0.995058	0.350906
0.391198	0.410758	0.198044	0.316176	0.169118	0.139706	0.012225	0.315403	0.552567	0.819071	0.997555	0.00489	0.210269	0.425428	0.682152	0.99022	0.002445	0.259169	0.542787	0.728606	1	0.748166	0.09291	0.158924	0.036765	0.061275	0.007353	0.002445	0.217604	0.440098	0.753056	1	0.03912	0.276284	0.584352	0.731051	0.973105	0.09291	0.486553	0.625917	0.772616	0.93643	0.352078	0.303922	0.03423	0.227384	0.381418	0.674817	0.987775	0.471883
0.446541	0.279088	0.274371	0.223446	0.211644	0.174666	0.003145	0.198899	0.451258	0.779088	1	0.001572	0.258648	0.507862	0.745283	0.997642	0.000786	0.301887	0.538522	0.724843	0.994497	0.40173	0.043239	0.555031	0.01967	0.09048	0.005507	0.000786	0.333333	0.562107	0.830189	1	0.033019	0.524371	0.860849	0.922956	0.995283	0.032233	0.194969	0.464623	0.654874	0.970912	0.397799	0.352478	0.013365	0.290881	0.538522	0.704403	0.996069	0.31761
0.375	0.381579	0.243421	0.317881	0.178808	0.145695	0.026316	0.269737	0.519737	0.717105	1	0.013158	0.217105	0.546053	0.815789	0.993421	0.006579	0.197368	0.375	0.585526	0.967105	0.592105	0.394737	0.013158	0.13245	0.013245	0	0.006579	0.282895	0.638158	0.848684	1	0.125	0.25	0.388158	0.585526	0.776316	0.085526	0.085526	0.085526	0.085526	0.092105	0.342105	0.384106	0.019737	0.203947	0.440789	0.611842	0.947368	0.381579
0.421687	0.212851	0.365462	0.185484	0.310484	0.177419	0.02008	0.269076	0.550201	0.767068	1	0.012048	0.196787	0.461847	0.694779	0.995984	0.004016	0.232932	0.453815	0.738956	0.97992	0.457831	0.309237	0.232932	0.133065	0.052419	0.004032	0.004016	0.261044	0.461847	0.714859	1	0.13253	0.285141	0.473896	0.726908	0.915663	0.02008	0.092369	0.526104	0.791165	0.967871	0.506024	0.419355	0.036145	0.305221	0.493976	0.738956	0.967871	0.240964
0.379348	0.354348	0.266304	0.243743	0.21654	0.189336	0.002174	0.252174	0.508696	0.738043	1	0.005435	0.253261	0.505435	0.75	0.997826	0.001087	0.226087	0.468478	0.76087	0.998913	0.592391	0.169565	0.238043	0.071817	0.054407	0.002176	0.001087	0.259783	0.55	0.765217	1	0.021739	0.191304	0.565217	0.881522	0.973913	0.031522	0.219565	0.421739	0.640217	0.993478	0.431522	0.369967	0.003261	0.291304	0.544565	0.805435	0.998913	0.369565
0.353646	0.328671	0.317682	0.238	0.229	0.198	0.008991	0.238761	0.481518	0.728272	1	0.001998	0.265734	0.511489	0.759241	0.995005	0.000999	0.234765	0.501499	0.737263	0.999001	0.458541	0.217782	0.323676	0.078	0.068	0.008	0.000999	0.257742	0.460539	0.696304	1	0.021978	0.317682	0.54046	0.751249	0.999001	0.007992	0.201798	0.585415	0.783217	0.989011	0.527473	0.36	0.002997	0.258741	0.548452	0.766234	0.998002	0.36963
0.366038	0.320755	0.313208	0.265152	0.208333	0.204545	0.007547	0.264151	0.539623	0.754717	1	0.011321	0.203774	0.430189	0.701887	0.984906	0.003774	0.260377	0.471698	0.732075	0.981132	0.388679	0.090566	0.520755	0.034091	0.102273	0.003788	0.003774	0.09434	0.34717	0.74717	1	0.211321	0.777358	0.826415	0.849057	0.879245	0.109434	0.309434	0.49434	0.645283	0.988679	0.498113	0.363636	0.022642	0.279245	0.471698	0.698113	0.981132	0.335849
0.359756	0.420732	0.219512	0.276074	0.202454	0.153374	0.02439	0.280488	0.52439	0.72561	0.97561	0.012195	0.176829	0.365854	0.670732	0.987805	0.006098	0.439024	0.634146	0.804878	1	0.45122	0.195122	0.353659	0.06135	0.07362	0	0.006098	0.317073	0.432927	0.682927	1	0.268293	0.518293	0.652439	0.823171	0.902439	0.018293	0.146341	0.5	0.707317	0.969512	0.292683	0.404908	0.030488	0.481707	0.621951	0.786585	0.981707	0.414634
0.318264	0.385172	0.296564	0.228261	0.199275	0.226449	0.01085	0.244123	0.468354	0.76311	0.994575	0.003617	0.253165	0.520796	0.759494	1	0.001808	0.240506	0.481013	0.712477	0.998192	0.481013	0.063291	0.455696	0.019928	0.077899	0.005435	0.001808	0.249548	0.636528	0.831826	1	0.056058	0.068716	0.206148	0.381555	0.942134	0.005425	0.305606	0.468354	0.650995	0.985533	0.533454	0.358696	0.007233	0.233273	0.471971	0.654611	0.990958	0.396022
0.329588	0.363296	0.307116	0.244361	0.221805	0.203008	0.011236	0.254682	0.456929	0.745318	0.988764	0.007491	0.277154	0.539326	0.7603	1	0.003745	0.235955	0.460674	0.689139	0.996255	0.434457	0.359551	0.205993	0.131579	0.033835	0.003759	0.003745	0.209738	0.498127	0.70412	1	0.097378	0.40824	0.595506	0.745318	0.925094	0.022472	0.161049	0.220974	0.940075	0.992509	0.509363	0.360902	0.014981	0.307116	0.520599	0.722846	0.985019	0.367041
0.314251	0.382306	0.303443	0.224269	0.203044	0.24189	0.000801	0.254604	0.504404	0.748599	1	0.001601	0.242594	0.489592	0.734988	0.9996	0.0004	0.252602	0.505204	0.771817	0.997998	0.48799	0.180144	0.331865	0.074089	0.067681	0.006808	0.0004	0.270616	0.520817	0.724179	1	0.002002	0.210568	0.368295	0.652522	0.997998	0.006005	0.255004	0.545236	0.835869	0.995196	0.540032	0.387665	0.001601	0.244596	0.48799	0.76221	0.998399	0.400721
0.319048	0.37619	0.304762	0.248804	0.181818	0.205742	0.009524	0.219048	0.509524	0.766667	0.995238	0.02381	0.242857	0.433333	0.680952	1	0.004762	0.195238	0.585714	0.809524	0.980952	0.533333	0.152381	0.314286	0.076555	0.066986	0	0.004762	0.257143	0.4	0.695238	1	0.014286	0.080952	0.590476	0.747619	0.92381	0.109524	0.209524	0.566667	0.790476	0.980952	0.509524	0.373206	0.019048	0.319048	0.519048	0.752381	0.980952	0.37619
0.361345	0.243697	0.394958	0.186441	0.313559	0.220339	0.016807	0.159664	0.453782	0.613445	1	0.058824	0.327731	0.470588	0.789916	0.991597	0.008403	0.243697	0.521008	0.731092	0.966387	0.319328	0.394958	0.285714	0.118644	0.050847	0.016949	0.008403	0.159664	0.327731	0.764706	1	0.05042	0.193277	0.352941	0.714286	0.932773	0.462185	0.521008	0.596639	0.815126	0.89916	0.588235	0.372881	0.05042	0.285714	0.579832	0.764706	0.966387	0.218487
0.376623	0.313853	0.309524	0.262473	0.225597	0.193059	0.006494	0.218615	0.495671	0.761905	1	0.008658	0.268398	0.512987	0.746753	0.991342	0.002165	0.253247	0.469697	0.727273	0.995671	0.493506	0.188312	0.318182	0.086768	0.065076	0.004338	0.002165	0.192641	0.536797	0.785714	1	0.012987	0.077922	0.474026	0.850649	0.97619	0.207792	0.311688	0.448052	0.701299	0.989177	0.489177	0.368764	0.008658	0.322511	0.465368	0.735931	0.991342	0.322511
0.294698	0.40074	0.304562	0.253086	0.164198	0.244444	0.003699	0.268804	0.521578	0.734895	0.995068	0.002466	0.22688	0.491985	0.745993	1	0.001233	0.250308	0.489519	0.763255	0.998767	0.442663	0.187423	0.369914	0.080247	0.07284	0.003704	0.001233	0.297164	0.532676	0.786683	1	0.003699	0.173859	0.414303	0.875462	0.991369	0.023428	0.241677	0.484587	0.614057	0.95561	0.520345	0.402469	0.004932	0.244143	0.452528	0.691739	0.996301	0.418002
0.40038	0.337761	0.26186	0.285171	0.224335	0.15019	0.005693	0.225806	0.426945	0.709677	0.996205	0.003795	0.210626	0.455408	0.732448	1	0.001898	0.42315	0.601518	0.802657	0.998102	0.563567	0.148008	0.288425	0.060837	0.04943	0.015209	0.001898	0.189753	0.347249	0.658444	1	0.055028	0.402277	0.667932	0.793169	0.973435	0.00759	0.442125	0.593928	0.806452	0.994307	0.436433	0.406844	0.013283	0.383302	0.574953	0.798861	0.99241	0.368121
0.328244	0.343511	0.328244	0.269231	0.192308	0.223077	0.015267	0.175573	0.412214	0.732824	0.977099	0.007634	0.282443	0.458015	0.709924	1	0.022901	0.251908	0.519084	0.80916	0.992366	0.412214	0.374046	0.21374	0.115385	0.038462	0.007692	0.007634	0.160305	0.305344	0.59542	1	0.030534	0.328244	0.465649	0.587786	0.70229	0.229008	0.78626	0.839695	0.908397	0.961832	0.450382	0.507692	0.022901	0.244275	0.541985	0.78626	0.969466	0.374046
0.374408	0.334123	0.291469	0.228029	0.228029	0.213777	0.004739	0.303318	0.514218	0.765403	0.99763	0.007109	0.279621	0.545024	0.741706	0.983412	0.00237	0.177725	0.405213	0.684834	1	0.566351	0.094787	0.338863	0.035629	0.078385	0.007126	0.00237	0.322275	0.594787	0.78673	1	0.049763	0.263033	0.393365	0.471564	0.969194	0.023697	0.116114	0.343602	0.654028	0.995261	0.450237	0.413302	0.018957	0.189573	0.393365	0.64218	0.995261	0.372038
0.346667	0.32	0.333333	0.243243	0.22973	0.216216	0.026667	0.2	0.573333	0.706667	1	0.04	0.306667	0.493333	0.76	0.96	0.013333	0.226667	0.413333	0.653333	0.973333	0.453333	0.453333	0.093333	0.162162	0.027027	0	0.013333	0.2	0.573333	0.733333	1	0.226667	0.36	0.533333	0.8	0.946667	0.08	0.08	0.106667	0.133333	0.16	0.466667	0.378378	0.066667	0.28	0.506667	0.8	0.933333	0.346667
0.315789	0.368421	0.315789	0.166667	0.204545	0.212121	0.015038	0.225564	0.503759	0.789474	1	0.022556	0.285714	0.473684	0.729323	0.992481	0.007519	0.210526	0.511278	0.699248	0.984962	0.368421	0.240602	0.390977	0.068182	0.083333	0.007576	0.007519	0.270677	0.451128	0.87218	1	0.052632	0.293233	0.390977	0.488722	0.714286	0.142857	0.233083	0.601504	0.789474	0.962406	0.413534	0.393939	0.030075	0.18797	0.413534	0.616541	0.857143	0.360902
0.385965	0.311404	0.302632	0.232796	0.237189	0.171303	0.004386	0.219298	0.495614	0.744152	1	0.002924	0.25731	0.517544	0.763158	0.998538	0.001462	0.248538	0.479532	0.745614	0.942982	0.535088	0.159357	0.305556	0.068814	0.089312	0.001464	0.001462	0.274854	0.538012	0.72076	1	0.096491	0.326023	0.592105	0.766082	0.921053	0.002924	0.121345	0.407895	0.744152	0.997076	0.488304	0.339678	0.020468	0.251462	0.457602	0.75731	0.99269	0.349415
0.279441	0.382236	0.338323	0.212787	0.202797	0.261738	0.00499	0.213573	0.44012	0.725549	0.99501	0.001996	0.280439	0.520958	0.766467	1	0.000998	0.238523	0.506986	0.737525	0.992016	0.468064	0.259481	0.272455	0.094905	0.050949	0.004995	0.000998	0.316367	0.528942	0.785429	1	0.003992	0.391218	0.615768	0.842315	0.97505	0.007984	0.091816	0.224551	0.570858	0.868263	0.632735	0.351648	0.003992	0.272455	0.541916	0.773453	0.992016	0.399202
0.323136	0.445507	0.231358	0.260536	0.130268	0.204981	0.003824	0.248566	0.487572	0.711281	0.994264	0.005736	0.229446	0.51434	0.741874	1	0.001912	0.273423	0.470363	0.780115	0.99044	0.695985	0.049713	0.254302	0.032567	0.051724	0.001916	0.001912	0.239006	0.516252	0.699809	1	0.049713	0.210325	0.443595	0.537285	0.837476	0.133843	0.328872	0.424474	0.921606	0.994264	0.386233	0.383142	0.00956	0.273423	0.539197	0.776291	0.99044	0.435946
0.353333	0.295556	0.351111	0.207127	0.25167	0.207127	0.006667	0.217778	0.475556	0.755556	0.971111	0.008889	0.3	0.522222	0.76	0.997778	0.002222	0.222222	0.486667	0.728889	1	0.351111	0.08	0.568889	0.028953	0.100223	0.002227	0.002222	0.251111	0.533333	0.784444	1	0.222222	0.295556	0.477778	0.544444	0.626667	0.004444	0.184444	0.504444	0.755556	0.96	0.54	0.4098	0.004444	0.264444	0.488889	0.677778	0.995556	0.333333
0.432668	0.329177	0.238155	0.27965	0.217228	0.147316	0.003741	0.235661	0.485037	0.761845	0.998753	0.002494	0.274314	0.493766	0.729426	0.997506	0.001247	0.244389	0.514963	0.778055	1	0.451372	0.01995	0.528678	0.012484	0.077403	0	0.001247	0.253117	0.445137	0.605985	1	0.498753	0.502494	0.612219	0.765586	0.84414	0.016209	0.233167	0.637157	0.865337	0.997506	0.361596	0.401998	0.007481	0.279302	0.528678	0.784289	0.995012	0.342893
0.405797	0.289855	0.304348	0.264706	0.25	0.147059	0.043478	0.275362	0.449275	0.652174	1	0.072464	0.144928	0.434783	0.681159	0.985507	0.014493	0.217391	0.608696	0.782609	0.971014	0.565217	0.15942	0.275362	0.088235	0.058824	0	0.014493	0.130435	0.362319	0.565217	1	0.173913	0.188406	0.231884	0.478261	0.956522	0.608696	0.652174	0.73913	0.811594	0.884058	0.333333	0.382353	0.144928	0.231884	0.623188	0.753623	0.927536	0.275362
0.326923	0.370192	0.302885	0.270531	0.207729	0.241546	0.009615	0.225962	0.432692	0.677885	1	0.014423	0.264423	0.5625	0.807692	0.995192	0.004808	0.235577	0.475962	0.706731	0.908654	0.418269	0.394231	0.1875	0.130435	0.05314	0.004831	0.004808	0.283654	0.596154	0.807692	1	0.014423	0.293269	0.442308	0.610577	0.884615	0.076923	0.115385	0.264423	0.783654	0.961538	0.427885	0.444444	0.019231	0.25	0.456731	0.682692	0.889423	0.360577
0.316294	0.400958	0.282748	0.216	0.16	0.232	0.00639	0.34984	0.63738	0.857827	1	0.003195	0.215655	0.460064	0.710863	0.996805	0.001597	0.201278	0.429712	0.635783	0.998403	0.416933	0.119808	0.463259	0.048	0.0864	0.0064	0.001597	0.217252	0.5	0.777955	1	0.004792	0.244409	0.378594	0.538339	0.99361	0.027157	0.303514	0.539936	0.771565	0.979233	0.485623	0.3552	0.004792	0.198083	0.408946	0.608626	0.998403	0.413738
0.452632	0.178947	0.368421	0.180851	0.319149	0.095745	0.021053	0.221053	0.442105	0.736842	1	0.042105	0.168421	0.463158	0.610526	0.863158	0.010526	0.231579	0.505263	0.789474	0.957895	0.305263	0.326316	0.368421	0.085106	0.06383	0.021277	0.010526	0.147368	0.452632	0.6	1	0.042105	0.105263	0.505263	0.652632	0.968421	0.168421	0.242105	0.336842	0.8	0.926316	0.484211	0.425532	0.042105	0.231579	0.515789	0.705263	0.957895	0.2
0.40404	0.318182	0.277778	0.233503	0.218274	0.162437	0.040404	0.232323	0.464646	0.762626	1	0.015152	0.247475	0.570707	0.828283	0.979798	0.005051	0.237374	0.494949	0.661616	0.878788	0.469697	0.09596	0.434343	0.060914	0.081218	0	0.005051	0.328283	0.671717	0.858586	1	0.025253	0.065657	0.712121	0.747475	0.80303	0.111111	0.232323	0.373737	0.545455	0.914141	0.449495	0.406091	0.030303	0.277778	0.510101	0.656566	0.939394	0.313131
0.366154	0.307692	0.326154	0.240741	0.216049	0.222222	0.009231	0.283077	0.523077	0.766154	0.996923	0.006154	0.193846	0.387692	0.72	0.987692	0.003077	0.298462	0.498462	0.741538	1	0.436923	0.218462	0.344615	0.074074	0.067901	0	0.003077	0.190769	0.455385	0.704615	1	0.092308	0.230769	0.44	0.753846	0.938462	0.024615	0.387692	0.578462	0.827692	0.975385	0.532308	0.32716	0.024615	0.258462	0.486154	0.726154	0.987692	0.326154
0.328571	0.332143	0.339286	0.207885	0.229391	0.240143	0.007143	0.3	0.571429	0.803571	0.989286	0.046429	0.235714	0.439286	0.642857	1	0.003571	0.189286	0.482143	0.760714	0.992857	0.392857	0.217857	0.389286	0.064516	0.078853	0.014337	0.003571	0.307143	0.564286	0.832143	1	0.010714	0.078571	0.246429	0.585714	0.896429	0.110714	0.296429	0.475	0.75	0.985714	0.492857	0.444444	0.010714	0.242857	0.467857	0.721429	0.992857	0.375
0.442308	0.427885	0.129808	0.415459	0.111111	0.10628	0.014423	0.269231	0.514423	0.716346	1	0.009615	0.307692	0.581731	0.807692	0.990385	0.004808	0.100962	0.192308	0.326923	0.947115	0.759615	0.129808	0.110577	0.048309	0.048309	0	0.004808	0.413462	0.605769	0.802885	1	0.014423	0.139423	0.1875	0.307692	0.341346	0.072115	0.091346	0.216346	0.245192	0.879808	0.278846	0.318841	0.019231	0.158654	0.322115	0.673077	0.961538	0.466346
0.282451	0.390447	0.327103	0.205821	0.199584	0.279626	0.002077	0.224299	0.476636	0.739356	0.997923	0.003115	0.283489	0.537902	0.779855	1	0.001038	0.253375	0.477674	0.724818	0.998962	0.47352	0.166147	0.360332	0.076923	0.087318	0.008316	0.001038	0.279335	0.556594	0.760125	1	0.022845	0.274143	0.507788	0.773624	0.976116	0.010384	0.226376	0.418484	0.701973	0.997923	0.615784	0.365904	0.003115	0.262721	0.477674	0.751817	0.998962	0.407061
0.363014	0.363014	0.273973	0.255172	0.248276	0.186207	0.013699	0.321918	0.445205	0.739726	1	0.054795	0.246575	0.5	0.678082	0.986301	0.006849	0.191781	0.520548	0.767123	0.972603	0.335616	0.328767	0.335616	0.131034	0.048276	0.006897	0.006849	0.150685	0.561644	0.746575	1	0.013699	0.19863	0.60274	0.883562	0.986301	0.164384	0.321918	0.40411	0.486301	0.821918	0.39726	0.482759	0.020548	0.19863	0.534247	0.732877	0.972603	0.369863
0.408805	0.27044	0.320755	0.227848	0.227848	0.189873	0.018868	0.201258	0.427673	0.72327	0.987421	0.012579	0.339623	0.534591	0.773585	0.981132	0.006289	0.194969	0.45283	0.660377	1	0.339623	0.08805	0.572327	0.037975	0.088608	0	0.006289	0.081761	0.427673	0.710692	1	0.45283	0.465409	0.490566	0.528302	0.566038	0.132075	0.283019	0.603774	0.792453	0.981132	0.459119	0.443038	0.044025	0.264151	0.534591	0.742138	0.981132	0.264151
0.323944	0.341549	0.334507	0.183746	0.222615	0.268551	0.010563	0.34507	0.542254	0.795775	1	0.007042	0.190141	0.380282	0.679577	0.989437	0.003521	0.214789	0.528169	0.753521	0.996479	0.475352	0.179577	0.34507	0.056537	0.070671	0.007067	0.003521	0.302817	0.59507	0.84507	1	0.010563	0.070423	0.228873	0.56338	0.883803	0.098592	0.278169	0.454225	0.725352	0.975352	0.507042	0.438163	0.014085	0.207746	0.433099	0.683099	0.985915	0.352113
0.402299	0.229885	0.367816	0.244186	0.360465	0.127907	0.034483	0.241379	0.425287	0.666667	0.977011	0.126437	0.264368	0.655172	0.770115	0.931034	0.011494	0.172414	0.494253	0.804598	1	0.45977	0.310345	0.229885	0.116279	0.046512	0	0.011494	0.241379	0.666667	0.804598	1	0.045977	0.275862	0.574713	0.712644	0.896552	0.137931	0.183908	0.390805	0.448276	0.505747	0.344828	0.395349	0.045977	0.16092	0.448276	0.597701	0.965517	0.218391
0.323432	0.369637	0.306931	0.198347	0.178512	0.213223	0.00495	0.171617	0.39934	0.689769	0.990099	0.024752	0.339934	0.544554	0.825083	1	0.00165	0.252475	0.521452	0.727723	0.9967	0.580858	0.189769	0.229373	0.07438	0.041322	0.004959	0.00165	0.290429	0.478548	0.778878	1	0.059406	0.234323	0.524752	0.706271	0.966997	0.014851	0.19637	0.556106	0.744224	0.9967	0.5	0.390083	0.049505	0.280528	0.521452	0.762376	0.99505	0.412541
0.452991	0.17094	0.376068	0.163793	0.284483	0.137931	0.025641	0.239316	0.512821	0.760684	0.991453	0.017094	0.222222	0.401709	0.675214	1	0.008547	0.273504	0.538462	0.74359	0.982906	0.376068	0.188034	0.435897	0.068966	0.103448	0	0.008547	0.094017	0.376068	0.675214	1	0.213675	0.273504	0.324786	0.700855	0.752137	0.111111	0.444444	0.57265	0.82906	0.957265	0.470085	0.37931	0.042735	0.307692	0.521368	0.726496	0.982906	0.188034
0.30625	0.325	0.36875	0.176101	0.201258	0.27673	0.04375	0.26875	0.49375	0.725	0.975	0.0125	0.21875	0.425	0.7375	0.99375	0.00625	0.2375	0.50625	0.75	1	0.34375	0.025	0.63125	0.012579	0.075472	0.012579	0.00625	0.08125	0.3625	0.83125	1	0.0875	0.0875	0.09375	0.1	0.74375	0.13125	0.3125	0.5125	0.6875	0.93125	0.53125	0.339623	0.025	0.21875	0.50625	0.69375	0.9875	0.34375
0.344023	0.393586	0.262391	0.272993	0.178102	0.179562	0.004373	0.290087	0.559767	0.778426	1	0.002915	0.193878	0.514577	0.760933	0.997085	0.001458	0.244898	0.443149	0.712828	0.995627	0.460641	0.144315	0.395044	0.046715	0.105109	0.005839	0.001458	0.186589	0.529155	0.798834	1	0.144315	0.319242	0.46793	0.607872	0.717201	0.016035	0.266764	0.48688	0.758017	0.947522	0.48105	0.347445	0.016035	0.239067	0.450437	0.666181	0.995627	0.411079
0.296788	0.424142	0.27907	0.233925	0.149667	0.247228	0.00443	0.251384	0.417497	0.702104	0.993355	0.002215	0.241417	0.500554	0.730897	0.998893	0.001107	0.250277	0.554817	0.790698	1	0.728682	0.135105	0.136213	0.052106	0.043237	0.003326	0.001107	0.231451	0.440753	0.646733	1	0.045404	0.676633	0.787375	0.874862	0.991141	0.003322	0.178295	0.527132	0.82392	0.984496	0.334441	0.330377	0.005537	0.385382	0.677741	0.844961	0.996678	0.459579
0.411765	0.323529	0.264706	0.237037	0.214815	0.162963	0.029412	0.242647	0.544118	0.772059	1	0.014706	0.220588	0.514706	0.779412	0.955882	0.007353	0.264706	0.404412	0.683824	0.926471	0.441176	0.191176	0.367647	0.051852	0.081481	0.022222	0.007353	0.220588	0.705882	0.830882	1	0.154412	0.191176	0.676471	0.889706	0.941176	0.029412	0.25	0.375	0.5	0.639706	0.433824	0.444444	0.051471	0.294118	0.514706	0.742647	0.926471	0.323529
0.293907	0.46595	0.240143	0.240575	0.16158	0.149013	0.005376	0.277778	0.491039	0.783154	0.994624	0.008961	0.218638	0.507168	0.700717	1	0.001792	0.286738	0.464158	0.756272	0.987455	0.648746	0.200717	0.150538	0.071813	0.039497	0	0.001792	0.240143	0.505376	0.741935	1	0.005376	0.247312	0.417563	0.752688	0.987455	0.150538	0.318996	0.59319	0.731183	0.951613	0.546595	0.330341	0.003584	0.295699	0.528674	0.700717	0.991039	0.453405
0.408654	0.278846	0.3125	0.21256	0.2657	0.164251	0.014423	0.259615	0.5	0.778846	1	0.009615	0.173077	0.418269	0.639423	0.971154	0.004808	0.307692	0.514423	0.75	0.990385	0.475962	0.149038	0.375	0.062802	0.072464	0.033816	0.004808	0.149038	0.514423	0.711538	1	0.230769	0.293269	0.596154	0.697115	0.961538	0.038462	0.346154	0.456731	0.745192	0.985577	0.461538	0.396135	0.019231	0.360577	0.514423	0.745192	0.975962	0.254808
0.307359	0.385281	0.307359	0.234783	0.213043	0.226087	0.008658	0.268398	0.493506	0.722944	1	0.012987	0.21645	0.47619	0.800866	0.987013	0.004329	0.229437	0.489177	0.69697	0.995671	0.337662	0.095238	0.5671	0.034783	0.104348	0	0.004329	0.116883	0.406926	0.692641	1	0.398268	0.78355	0.835498	0.857143	0.891775	0.051948	0.272727	0.467532	0.614719	0.978355	0.493506	0.330435	0.025974	0.21645	0.47619	0.688312	0.991342	0.385281
0.380645	0.322581	0.296774	0.230603	0.256466	0.18319	0.008602	0.283871	0.522581	0.772043	0.963441	0.015054	0.24086	0.47957	0.733333	0.997849	0.002151	0.217204	0.494624	0.737634	1	0.354839	0.083871	0.56129	0.032328	0.092672	0.002155	0.002151	0.286022	0.537634	0.789247	1	0.210753	0.27957	0.395699	0.516129	0.597849	0.004301	0.178495	0.486022	0.731183	0.954839	0.541935	0.405172	0.006452	0.260215	0.48172	0.703226	0.995699	0.412903
0.291262	0.395071	0.313667	0.227952	0.162182	0.247384	0.001494	0.26587	0.494399	0.752054	0.992532	0.002987	0.231516	0.474235	0.734877	0.999253	0.000747	0.246453	0.525019	0.754294	1	0.533234	0.394324	0.072442	0.130045	0.028401	0.005979	0.000747	0.256161	0.480956	0.716953	1	0.00224	0.228529	0.485437	0.722928	0.932786	0.003734	0.373413	0.93652	0.970127	0.994025	0.619119	0.300448	0.00224	0.245706	0.49888	0.755041	0.998506	0.436146
0.255605	0.423019	0.321375	0.209581	0.178144	0.260479	0.014948	0.261584	0.502242	0.751868	1	0.00299	0.22272	0.490284	0.730942	0.998505	0.001495	0.2571	0.511211	0.768311	0.994021	0.5142	0.281016	0.204783	0.101796	0.050898	0.008982	0.001495	0.258595	0.520179	0.724963	1	0.040359	0.4858	0.656203	0.857997	0.99701	0.011958	0.161435	0.282511	0.41704	0.899851	0.666667	0.335329	0.013453	0.261584	0.499253	0.77429	0.99701	0.406577
0.329596	0.329596	0.340807	0.208989	0.238202	0.226966	0.015695	0.262332	0.506726	0.786996	1	0.004484	0.2287	0.441704	0.699552	0.993274	0.002242	0.248879	0.517937	0.73991	0.997758	0.486547	0.197309	0.316143	0.07191	0.058427	0	0.002242	0.282511	0.482063	0.76009	1	0.015695	0.275785	0.428251	0.860987	0.995516	0.049327	0.197309	0.511211	0.717489	0.852018	0.535874	0.4	0.017937	0.248879	0.502242	0.713004	0.997758	0.349776
0.5	0.342373	0.157627	0.351443	0.135823	0.103565	0.00339	0.252542	0.523729	0.755932	1	0.008475	0.240678	0.50678	0.798305	0.984746	0.001695	0.161017	0.435593	0.569492	0.998305	0.820339	0.077966	0.101695	0.044143	0.040747	0.010187	0.001695	0.250847	0.540678	0.776271	1	0.005085	0.379661	0.515254	0.6	0.972881	0.011864	0.044068	0.425424	0.476271	0.916949	0.235593	0.244482	0.005085	0.127119	0.289831	0.459322	0.998305	0.384746
0.304516	0.36	0.335484	0.20801	0.197674	0.248062	0.003871	0.276129	0.536774	0.770323	0.993548	0.002581	0.2	0.455484	0.716129	1	0.00129	0.286452	0.503226	0.757419	0.997419	0.477419	0.175484	0.347097	0.065891	0.091731	0.016796	0.00129	0.190968	0.402581	0.735484	1	0.067097	0.298065	0.503226	0.682581	0.931613	0.003871	0.407742	0.574194	0.794839	0.990968	0.552258	0.364341	0.006452	0.273548	0.485161	0.772903	0.994839	0.367742
0.347727	0.393182	0.259091	0.273349	0.182232	0.207289	0.006818	0.238636	0.479545	0.779545	0.995455	0.004545	0.245455	0.497727	0.722727	1	0.002273	0.247727	0.527273	0.738636	0.993182	0.568182	0.218182	0.213636	0.107062	0.052392	0.006834	0.002273	0.229545	0.390909	0.618182	1	0.015909	0.268182	0.529545	0.743182	0.997727	0.118182	0.584091	0.775	0.884091	0.981818	0.513636	0.378132	0.011364	0.320455	0.579545	0.759091	0.997727	0.388636
0.248175	0.363747	0.388078	0.161998	0.155907	0.281364	0.004866	0.343066	0.675182	0.824818	1	0.007299	0.23236	0.476886	0.754258	0.998783	0.001217	0.222628	0.413625	0.616788	0.995134	0.412409	0.026764	0.560827	0.014616	0.070646	0.002436	0.001217	0.192214	0.694647	0.880779	1	0.00365	0.115572	0.319951	0.93674	0.954988	0.019465	0.262774	0.437956	0.613139	0.973236	0.603406	0.272838	0.00365	0.238443	0.414842	0.60219	0.995134	0.355231
0.424528	0.273585	0.301887	0.180952	0.314286	0.2	0.018868	0.292453	0.481132	0.726415	0.990566	0.028302	0.169811	0.59434	0.754717	0.943396	0.009434	0.198113	0.471698	0.716981	1	0.292453	0	0.707547	0	0.133333	0	0.009434	0.377358	0.707547	0.783019	1	0	0	0	0	0	0.037736	0.226415	0.433962	0.650943	0.971698	0.462264	0.533333	0.028302	0.216981	0.471698	0.735849	0.981132	0.292453
0.19222	0.473684	0.334096	0.167431	0.15367	0.307339	0.025172	0.279176	0.487414	0.775744	0.98627	0.004577	0.226545	0.480549	0.723112	1	0.002288	0.24714	0.524027	0.76659	0.997712	0.411899	0.187643	0.400458	0.087156	0.06422	0.004587	0.002288	0.157895	0.418764	0.663616	1	0.08238	0.263158	0.501144	0.681922	0.933638	0.022883	0.302059	0.556064	0.791762	0.993135	0.688787	0.284404	0.018307	0.272311	0.512586	0.727689	0.990847	0.487414
0.378099	0.328512	0.293388	0.258799	0.219462	0.180124	0.008264	0.272727	0.475207	0.727273	1	0.004132	0.229339	0.506198	0.783058	0.997934	0.002066	0.21281	0.5	0.729339	0.993802	0.419421	0.047521	0.533058	0.026915	0.084886	0.00207	0.002066	0.22314	0.535124	0.752066	1	0.076446	0.084711	0.171488	0.194215	0.863636	0.030992	0.301653	0.506198	0.762397	0.989669	0.481405	0.397516	0.006198	0.204545	0.400826	0.654959	0.985537	0.322314
0.282383	0.380829	0.336788	0.220779	0.2	0.249351	0.012953	0.194301	0.510363	0.738342	0.987047	0.010363	0.261658	0.494819	0.76943	1	0.002591	0.259067	0.487047	0.733161	0.994819	0.525907	0.199482	0.274611	0.075325	0.075325	0.002597	0.002591	0.209845	0.458549	0.751295	1	0.093264	0.303109	0.481865	0.795337	0.945596	0.025907	0.277202	0.528497	0.670984	0.992228	0.580311	0.348052	0.005181	0.238342	0.440415	0.699482	0.987047	0.388601
0.334646	0.338583	0.326772	0.229249	0.209486	0.229249	0.007874	0.216535	0.527559	0.755906	1	0.019685	0.271654	0.492126	0.700787	0.968504	0.003937	0.200787	0.46063	0.732283	0.984252	0.452756	0.208661	0.338583	0.090909	0.083004	0.003953	0.003937	0.224409	0.484252	0.724409	1	0.011811	0.161417	0.370079	0.574803	0.862205	0.07874	0.287402	0.53937	0.791339	0.992126	0.594488	0.355731	0.011811	0.299213	0.519685	0.751969	0.984252	0.38189
0.129442	0.431472	0.439086	0.119593	0.089059	0.391858	0.005076	0.314721	0.484772	0.80203	0.992386	0.017766	0.241117	0.507614	0.779188	1	0.002538	0.233503	0.489848	0.713198	0.997462	0.167513	0	0.832487	0	0.081425	0	0.002538	0.362944	0.588832	0.893401	1	0	0	0	0	0	0.007614	0.238579	0.48731	0.720812	0.961929	0.819797	0.122137	0.007614	0.246193	0.494924	0.736041	0.954315	0.403553
0.287183	0.390679	0.322138	0.242798	0.164609	0.233196	0.004798	0.228924	0.457162	0.779301	0.996573	0.002056	0.270048	0.501714	0.771076	0.999315	0.000685	0.252228	0.531186	0.711446	1	0.553804	0.17889	0.267306	0.072702	0.042524	0.002743	0.000685	0.263194	0.52159	0.82865	1	0.032214	0.156271	0.26525	0.542152	0.998629	0.004112	0.390679	0.587389	0.697053	0.939685	0.595613	0.323731	0.003427	0.244003	0.516107	0.733379	0.997944	0.403701
0.205128	0.371795	0.423077	0.135484	0.129032	0.290323	0.038462	0.134615	0.532051	0.75	1	0.019231	0.205128	0.461538	0.762821	0.980769	0.00641	0.301282	0.487179	0.685897	0.942308	0.25	0	0.75	0	0.090323	0	0.00641	0.070513	0.160256	0.737179	1	0	0	0	0	0	0.025641	0.320513	0.50641	0.75641	0.955128	0.705128	0.219355	0.025641	0.320513	0.519231	0.724359	0.961538	0.403846
0.380734	0.261468	0.357798	0.175115	0.258065	0.193548	0.009174	0.192661	0.481651	0.747706	0.986239	0.022936	0.238532	0.43578	0.651376	0.977064	0.004587	0.275229	0.53211	0.733945	1	0.408257	0.169725	0.422018	0.073733	0.092166	0	0.004587	0.261468	0.417431	0.706422	1	0.233945	0.293578	0.527523	0.724771	0.876147	0.022936	0.151376	0.545872	0.775229	0.977064	0.577982	0.387097	0.013761	0.298165	0.527523	0.724771	0.990826	0.270642
0.350598	0.314741	0.334661	0.188	0.28	0.24	0.003984	0.207171	0.462151	0.685259	0.984064	0.01992	0.290837	0.422311	0.737052	1	0.007968	0.250996	0.585657	0.800797	0.996016	0.498008	0.055777	0.446215	0.032	0.112	0.008	0.003984	0.23506	0.390438	0.697211	1	0.10757	0.12749	0.223108	0.258964	0.286853	0.015936	0.494024	0.629482	0.820717	0.98008	0.422311	0.488	0.023904	0.227092	0.533865	0.76494	0.972112	0.350598
0.227273	0.272727	0.5	0.092308	0.184615	0.261538	0.030303	0.075758	0.606061	0.787879	0.878788	0.181818	0.378788	0.69697	0.909091	1	0.015152	0.166667	0.333333	0.530303	0.969697	0.393939	0	0.606061	0	0.092308	0	0.015152	0.681818	0.787879	0.893939	1	0	0	0	0	0	0.045455	0.181818	0.333333	0.484848	0.80303	0.348485	0.4	0.060606	0.333333	0.439394	0.575758	0.893939	0.257576
0.302222	0.395556	0.302222	0.224944	0.187082	0.238307	0.006667	0.22	0.5	0.746667	1	0.004444	0.231111	0.511111	0.744444	0.993333	0.002222	0.268889	0.488889	0.748889	0.986667	0.395556	0.04	0.564444	0.022272	0.089087	0	0.002222	0.2	0.486667	0.755556	1	0.322222	0.328889	0.564444	0.704444	0.984444	0.011111	0.275556	0.493333	0.746667	0.957778	0.633333	0.316258	0.011111	0.284444	0.513333	0.771111	0.986667	0.388889
0.259524	0.433333	0.307143	0.212411	0.155131	0.293556	0.014286	0.297619	0.514286	0.733333	0.966667	0.007143	0.238095	0.571429	0.802381	0.997619	0.002381	0.2	0.404762	0.607143	1	0.728571	0.12381	0.147619	0.088305	0.050119	0.002387	0.002381	0.27619	0.485714	0.77381	1	0.1	0.209524	0.438095	0.609524	0.82619	0.007143	0.05	0.645238	0.72619	0.995238	0.502381	0.501193	0.004762	0.242857	0.519048	0.778571	0.992857	0.459524
0.318885	0.359133	0.321981	0.226708	0.217391	0.208075	0.04644	0.263158	0.547988	0.817337	1	0.006192	0.23839	0.458204	0.671827	0.987616	0.003096	0.213622	0.513932	0.752322	0.993808	0.408669	0.201238	0.390093	0.090062	0.096273	0.003106	0.003096	0.260062	0.470588	0.733746	1	0.012384	0.204334	0.594427	0.817337	0.96904	0.040248	0.23839	0.436533	0.705882	0.993808	0.557276	0.335404	0.009288	0.219814	0.495356	0.687307	0.993808	0.393189
0.184615	0.446154	0.369231	0.140625	0.15625	0.296875	0.092308	0.415385	0.569231	0.676923	1	0.030769	0.307692	0.553846	0.815385	0.969231	0.015385	0.169231	0.292308	0.584615	0.984615	0.507692	0.061538	0.430769	0.046875	0.046875	0.015625	0.015385	0.507692	0.630769	0.815385	1	0.415385	0.415385	0.846154	0.861538	0.876923	0.046154	0.138462	0.246154	0.353846	0.723077	0.6	0.40625	0.061538	0.2	0.369231	0.707692	0.984615	0.492308
0.221374	0.465649	0.312977	0.215385	0.130769	0.292308	0.045802	0.335878	0.51145	0.755725	1	0.022901	0.221374	0.450382	0.732824	0.961832	0.007634	0.19084	0.480916	0.671756	0.992366	0.473282	0.381679	0.145038	0.207692	0.023077	0.007692	0.007634	0.274809	0.572519	0.725191	1	0.183206	0.389313	0.557252	0.816794	0.992366	0.030534	0.053435	0.091603	0.129771	0.312977	0.473282	0.461538	0.030534	0.160305	0.427481	0.740458	0.992366	0.458015
0.348285	0.3219	0.329815	0.195767	0.238095	0.206349	0.010554	0.234828	0.55409	0.804749	0.997361	0.005277	0.28496	0.538259	0.725594	0.986807	0.002639	0.216359	0.430079	0.6781	1	0.356201	0.139842	0.503958	0.055556	0.087302	0.007937	0.002639	0.448549	0.604222	0.796834	1	0.292876	0.469657	0.575198	0.664908	0.944591	0.010554	0.147757	0.319261	0.720317	0.994723	0.525066	0.386243	0.013193	0.226913	0.424802	0.662269	0.992084	0.337731
0.160237	0.418398	0.421365	0.111441	0.109955	0.384844	0.002967	0.264095	0.557864	0.77003	1	0.007418	0.272997	0.510386	0.740356	0.995549	0.001484	0.222552	0.458457	0.744807	0.998516	0.250742	0.091988	0.65727	0.034175	0.069837	0.013373	0.001484	0.264095	0.563798	0.716617	1	0.005935	0.094955	0.154303	0.670623	0.95549	0.037092	0.277448	0.485163	0.781899	0.997033	0.795252	0.213967	0.005935	0.228487	0.470326	0.719585	0.992582	0.367953
0.304348	0.355072	0.34058	0.262774	0.189781	0.277372	0.021739	0.15942	0.391304	0.688406	0.963768	0.014493	0.26087	0.528986	0.797101	0.985507	0.007246	0.217391	0.557971	0.724638	1	0.318841	0.101449	0.57971	0.029197	0.145985	0	0.007246	0.253623	0.362319	0.65942	1	0.391304	0.405797	0.434783	0.485507	0.514493	0.036232	0.202899	0.615942	0.826087	0.992754	0.507246	0.394161	0.028986	0.347826	0.528986	0.681159	0.971014	0.384058
0.313901	0.376682	0.309417	0.265766	0.202703	0.234234	0.008969	0.246637	0.452915	0.73991	0.995516	0.026906	0.219731	0.520179	0.753363	1	0.004484	0.26009	0.484305	0.699552	0.977578	0.439462	0.139013	0.421525	0.054054	0.09009	0	0.004484	0.269058	0.511211	0.748879	1	0.008969	0.139013	0.479821	0.64574	0.892377	0.06278	0.255605	0.457399	0.726457	0.977578	0.64574	0.342342	0.013453	0.246637	0.511211	0.70852	0.986547	0.35426
0.303468	0.384393	0.312139	0.228986	0.17971	0.246377	0.00578	0.265896	0.520231	0.722543	1	0.008671	0.219653	0.459538	0.765896	0.99711	0.00289	0.248555	0.488439	0.748555	0.99422	0.482659	0.245665	0.271676	0.092754	0.057971	0	0.00289	0.245665	0.49422	0.760116	1	0.060694	0.280347	0.462428	0.803468	0.968208	0.095376	0.196532	0.526012	0.702312	0.939306	0.621387	0.382609	0.014451	0.263006	0.473988	0.710983	0.976879	0.375723
0.417281	0.3098	0.272919	0.251055	0.219409	0.177215	0.003161	0.210748	0.384615	0.680717	0.997893	0.002107	0.256059	0.55216	0.75764	0.998946	0.001054	0.361433	0.579557	0.792413	1	0.449947	0.187566	0.362487	0.064346	0.074895	0.003165	0.001054	0.184405	0.398314	0.685985	1	0.036881	0.551106	0.702845	0.906217	0.996839	0.004215	0.217071	0.420443	0.751317	0.965227	0.3804	0.303797	0.007376	0.487882	0.642782	0.822972	0.990516	0.33509
0.306122	0.384354	0.309524	0.204778	0.180887	0.279863	0.013605	0.227891	0.496599	0.693878	1	0.006803	0.258503	0.571429	0.778912	0.996599	0.003401	0.221088	0.462585	0.690476	0.969388	0.52381	0.187075	0.289116	0.105802	0.071672	0.003413	0.003401	0.197279	0.418367	0.710884	1	0.027211	0.268707	0.35034	0.62585	0.959184	0.14966	0.47619	0.673469	0.87415	0.94898	0.598639	0.327645	0.017007	0.251701	0.435374	0.636054	0.965986	0.435374
0.376307	0.296167	0.327526	0.22028	0.237762	0.185315	0.010453	0.261324	0.512195	0.714286	1	0.006969	0.198606	0.41115	0.620209	0.993031	0.003484	0.268293	0.602787	0.84669	0.996516	0.181185	0.003484	0.815331	0.006993	0.048951	0	0.003484	0.04878	0.209059	0.526132	1	0.013937	0.013937	0.013937	0.013937	0.013937	0.083624	0.303136	0.554007	0.770035	0.982578	0.365854	0.454545	0.013937	0.278746	0.512195	0.735192	0.986063	0.320557
0.294118	0.352941	0.352941	0.184211	0.190789	0.315789	0.019608	0.346405	0.529412	0.686275	1	0.026144	0.222222	0.457516	0.699346	0.986928	0.006536	0.196078	0.509804	0.784314	0.993464	0.51634	0.294118	0.189542	0.092105	0.026316	0	0.006536	0.281046	0.470588	0.666667	1	0.183007	0.346405	0.777778	0.895425	0.986928	0.013072	0.052288	0.098039	0.143791	0.601307	0.555556	0.421053	0.026144	0.183007	0.542484	0.764706	0.973856	0.366013
0.182891	0.418879	0.39823	0.189349	0.12426	0.322485	0.0059	0.150442	0.477876	0.663717	0.9941	0.00885	0.274336	0.495575	0.761062	1	0.00295	0.253687	0.530973	0.746313	0.99705	0.289086	0.00295	0.707965	0	0.071006	0.005917	0.00295	0.132743	0.457227	0.60767	1	0.259587	0.259587	0.259587	0.259587	0.259587	0.014749	0.286136	0.569322	0.778761	0.99705	0.699115	0.136095	0.017699	0.274336	0.557522	0.749263	0.99115	0.424779
0.248705	0.432642	0.318653	0.202597	0.163636	0.249351	0.005181	0.256477	0.510363	0.756477	1	0.010363	0.238342	0.487047	0.746114	0.981865	0.002591	0.240933	0.494819	0.733161	0.997409	0.417098	0.300518	0.282383	0.114286	0.062338	0	0.002591	0.297927	0.476684	0.733161	1	0.007772	0.227979	0.474093	0.69171	0.937824	0.028497	0.137306	0.590674	0.797927	0.994819	0.694301	0.311688	0.007772	0.248705	0.481865	0.748705	0.989637	0.479275
0.133333	0.348148	0.518519	0.074627	0.141791	0.41791	0.022222	0.251852	0.481481	0.696296	1	0.051852	0.207407	0.503704	0.762963	0.992593	0.007407	0.22963	0.474074	0.711111	0.962963	0.192593	0.059259	0.748148	0.007463	0.052239	0.007463	0.007407	0.266667	0.688889	0.733333	1	0.77037	0.777778	0.792593	0.807407	0.822222	0.014815	0.192593	0.414815	0.607407	0.977778	0.755556	0.208955	0.014815	0.214815	0.422222	0.651852	0.97037	0.362963
0.385428	0.406547	0.208025	0.249471	0.200846	0.118393	0.003168	0.372756	0.540655	0.736008	0.988384	0.002112	0.168955	0.318902	0.684266	0.99472	0.001056	0.411827	0.627244	0.871172	1	0.457233	0.014784	0.527983	0.0074	0.056025	0.005285	0.001056	0.165787	0.312566	0.734952	1	0.212249	0.214361	0.640971	0.888068	0.894403	0.011616	0.409715	0.554382	0.74868	0.998944	0.353749	0.384778	0.01056	0.26188	0.517423	0.778247	0.990496	0.428722
0.364486	0.383178	0.252336	0.339623	0.150943	0.226415	0.018692	0.280374	0.551402	0.747664	0.990654	0.028037	0.158879	0.401869	0.719626	0.981308	0.009346	0.214953	0.448598	0.775701	1	0.401869	0.009346	0.588785	0.009434	0.066038	0.009434	0.009346	0.093458	0.252336	0.35514	1	0.214953	0.214953	0.214953	0.214953	0.214953	0.168224	0.457944	0.635514	0.831776	0.981308	0.411215	0.415094	0.037383	0.233645	0.476636	0.719626	0.971963	0.364486
0.221198	0.366359	0.412442	0.154734	0.154734	0.30254	0.004608	0.251152	0.536866	0.776498	0.997696	0.016129	0.25576	0.474654	0.730415	0.988479	0.002304	0.211982	0.495392	0.723502	1	0.237327	0.006912	0.75576	0.004619	0.096998	0	0.002304	0.239631	0.548387	0.695853	1	0.592166	0.592166	0.592166	0.59447	0.596774	0.004608	0.246544	0.488479	0.75576	0.993088	0.691244	0.244804	0.009217	0.246544	0.456221	0.732719	0.993088	0.331797
0.315335	0.37149	0.313175	0.222944	0.192641	0.231602	0.017279	0.265659	0.526998	0.723542	0.99784	0.00432	0.24406	0.514039	0.742981	0.99568	0.00216	0.218143	0.470842	0.75378	1	0.485961	0.170626	0.343413	0.056277	0.095238	0	0.00216	0.341253	0.606911	0.809935	1	0.079914	0.302376	0.473002	0.790497	0.889849	0.008639	0.149028	0.397408	0.583153	0.984881	0.565875	0.350649	0.006479	0.269978	0.485961	0.742981	0.987041	0.347732
0.266904	0.421708	0.311388	0.199643	0.183601	0.306595	0.003559	0.218861	0.503559	0.798932	1	0.007117	0.252669	0.491103	0.717082	0.996441	0.001779	0.265125	0.496441	0.734875	0.994662	0.544484	0.448399	0.007117	0.210339	0.003565	0	0.001779	0.206406	0.503559	0.766904	1	0.005338	0.284698	0.492883	0.733096	0.996441	0.768683	0.768683	0.770463	0.772242	0.774021	0.507117	0.459893	0.010676	0.30427	0.567616	0.782918	0.996441	0.430605
0.423913	0.282609	0.293478	0.263736	0.241758	0.175824	0.065217	0.336957	0.521739	0.771739	0.98913	0.021739	0.119565	0.282609	0.630435	0.956522	0.01087	0.26087	0.445652	0.728261	1	0.576087	0	0.423913	0	0.065934	0	0.01087	0.141304	0.282609	0.847826	1	0	0	0	0	0	0.315217	0.402174	0.543478	0.652174	0.815217	0.304348	0.417582	0.043478	0.23913	0.413043	0.663043	0.847826	0.358696
0.256757	0.445946	0.297297	0.246575	0.136986	0.328767	0.027027	0.135135	0.459459	0.783784	0.945946	0.040541	0.22973	0.445946	0.621622	0.986486	0.013514	0.324324	0.567568	0.689189	1	0.459459	0.081081	0.459459	0.068493	0.041096	0.041096	0.013514	0.108108	0.432432	0.540541	1	0.351351	0.351351	0.391892	0.635135	0.675676	0.135135	0.22973	0.72973	0.837838	0.959459	0.581081	0.383562	0.067568	0.337838	0.540541	0.72973	0.959459	0.472973
0.314759	0.326807	0.358434	0.177979	0.220211	0.245852	0.006024	0.246988	0.501506	0.756024	0.990964	0.003012	0.222892	0.465361	0.716867	1	0.001506	0.260542	0.50753	0.774096	0.998494	0.521084	0.302711	0.176205	0.117647	0.054299	0.00905	0.001506	0.243976	0.513554	0.728916	1	0.009036	0.162651	0.358434	0.539157	0.993976	0.158133	0.53012	0.75	0.832831	0.963855	0.588855	0.349925	0.00753	0.274096	0.506024	0.736446	0.993976	0.375
0.317308	0.338462	0.344231	0.211946	0.2158	0.248555	0.007692	0.286538	0.528846	0.734615	0.998077	0.005769	0.180769	0.438462	0.719231	1	0.001923	0.296154	0.526923	0.782692	0.986538	0.434615	0.078846	0.486538	0.042389	0.096339	0	0.001923	0.165385	0.480769	0.819231	1	0.059615	0.190385	0.780769	0.809615	0.982692	0.005769	0.315385	0.492308	0.651923	0.925	0.634615	0.304432	0.005769	0.244231	0.488462	0.742308	0.982692	0.319231
0.286822	0.364341	0.348837	0.225681	0.182879	0.241245	0.011628	0.197674	0.457364	0.825581	1	0.03876	0.306202	0.542636	0.755814	0.98062	0.003876	0.217054	0.465116	0.717054	0.949612	0.5	0.25969	0.24031	0.085603	0.054475	0	0.003876	0.217054	0.44186	0.709302	1	0.255814	0.379845	0.472868	0.624031	0.879845	0.015504	0.069767	0.751938	0.810078	0.965116	0.48062	0.303502	0.015504	0.267442	0.472868	0.670543	0.96124	0.379845
0.272727	0.373206	0.354067	0.1875	0.1875	0.216346	0.019139	0.191388	0.502392	0.741627	0.995215	0.009569	0.253589	0.45933	0.751196	0.985646	0.004785	0.23445	0.492823	0.717703	1	0.382775	0.244019	0.373206	0.067308	0.076923	0.009615	0.004785	0.114833	0.617225	0.837321	1	0.043062	0.263158	0.559809	0.889952	0.995215	0.038278	0.320574	0.416268	0.665072	0.808612	0.641148	0.288462	0.043062	0.287081	0.521531	0.736842	0.990431	0.349282
0.344615	0.393846	0.261538	0.283951	0.188272	0.179012	0.015385	0.227692	0.507692	0.744615	1	0.006154	0.252308	0.476923	0.766154	0.996923	0.003077	0.249231	0.535385	0.698462	0.978462	0.289231	0.123077	0.587692	0.04321	0.049383	0	0.003077	0.264615	0.504615	0.658462	1	0.230769	0.350769	0.575385	0.612308	0.735385	0.012308	0.153846	0.486154	0.836923	0.984615	0.523077	0.364198	0.012308	0.276923	0.529231	0.790769	0.978462	0.406154
0.334266	0.33986	0.325874	0.22549	0.231092	0.207283	0.002797	0.286713	0.509091	0.773427	0.997203	0.013986	0.227972	0.46014	0.717483	1	0.001399	0.233566	0.488112	0.756643	0.995804	0.45035	0.327273	0.222378	0.119048	0.043417	0.004202	0.001399	0.204196	0.45035	0.695105	1	0.004196	0.212587	0.370629	0.620979	0.956643	0.039161	0.490909	0.815385	0.907692	0.995804	0.59021	0.361345	0.004196	0.232168	0.444755	0.717483	0.995804	0.362238
0.316327	0.316327	0.367347	0.226804	0.185567	0.257732	0.020408	0.387755	0.683673	0.816327	0.979592	0.040816	0.234694	0.44898	0.714286	1	0.010204	0.132653	0.336735	0.612245	0.908163	0.489796	0.204082	0.306122	0.113402	0.051546	0.010309	0.010204	0.27551	0.408163	0.714286	1	0.367347	0.489796	0.581633	0.663265	0.765306	0.030612	0.091837	0.173469	0.846939	0.928571	0.459184	0.371134	0.040816	0.142857	0.306122	0.632653	0.908163	0.367347
0.305447	0.44358	0.250973	0.233918	0.157895	0.241715	0.003891	0.229572	0.542802	0.723735	1	0.005837	0.276265	0.463035	0.741245	0.994163	0.001946	0.22179	0.484436	0.774319	0.998054	0.429961	0.114786	0.455253	0.060429	0.095517	0.001949	0.001946	0.249027	0.447471	0.727626	1	0.077821	0.227626	0.379377	0.568093	0.964981	0.011673	0.241245	0.597276	0.7607	0.998054	0.694553	0.335283	0.011673	0.284047	0.476654	0.754864	0.996109	0.48249
0.193333	0.573333	0.233333	0.234899	0.087248	0.302013	0.04	0.226667	0.36	0.66	0.993333	0.013333	0.246667	0.546667	0.76	0.986667	0.006667	0.233333	0.446667	0.7	1	0.92	0.08	0	0.053691	0	0	0.006667	0.253333	0.506667	0.733333	1	0.026667	0.24	0.446667	0.84	0.86	0	0	0	0	0	0.673333	0.402685	0.02	0.28	0.58	0.78	0.973333	0.513333
0.392435	0.36052	0.247045	0.259172	0.201183	0.164497	0.002364	0.250591	0.509456	0.743499	1	0.004728	0.242317	0.42435	0.6513	0.998818	0.001182	0.258865	0.591017	0.826241	0.997636	0.614657	0.128842	0.256501	0.056805	0.080473	0.004734	0.001182	0.231678	0.423168	0.638298	1	0.01182	0.061466	0.334515	0.583924	0.817967	0.078014	0.548463	0.801418	0.916076	0.996454	0.392435	0.36213	0.004728	0.287234	0.583924	0.822695	0.997636	0.373522
0.357259	0.377651	0.26509	0.24	0.185306	0.197551	0.001631	0.222675	0.473899	0.762643	1	0.003263	0.247961	0.504894	0.736542	0.998369	0.000816	0.301794	0.516313	0.747145	0.991028	0.569331	0.064437	0.366232	0.027755	0.073469	0.004898	0.000816	0.203915	0.423328	0.724307	1	0.115824	0.230832	0.650082	0.741436	0.991843	0.004078	0.377651	0.592985	0.855628	0.982055	0.423328	0.385306	0.004078	0.354812	0.566069	0.756933	0.997553	0.402936
0.218978	0.50365	0.277372	0.205882	0.147059	0.272059	0.145985	0.277372	0.518248	0.678832	0.941606	0.014599	0.262774	0.547445	0.759124	1	0.007299	0.124088	0.386861	0.664234	0.985401	0.452555	0.459854	0.087591	0.176471	0.029412	0.014706	0.007299	0.240876	0.459854	0.693431	1	0.043796	0.306569	0.554745	0.810219	0.985401	0.029197	0.058394	0.080292	0.10219	0.79562	0.620438	0.323529	0.021898	0.284672	0.489051	0.759124	0.985401	0.467153
0.302326	0.356589	0.341085	0.1875	0.265625	0.242188	0.015504	0.294574	0.542636	0.751938	0.984496	0.054264	0.193798	0.457364	0.75969	1	0.007752	0.255814	0.511628	0.697674	0.976744	0.410853	0.271318	0.317829	0.132812	0.054688	0.007812	0.007752	0.124031	0.294574	0.620155	1	0.023256	0.20155	0.581395	0.844961	0.976744	0.356589	0.426357	0.534884	0.689922	0.899225	0.581395	0.375	0.031008	0.232558	0.527132	0.790698	0.976744	0.403101
0.261097	0.438642	0.300261	0.219895	0.159686	0.219895	0.020888	0.336815	0.590078	0.775457	1	0.013055	0.18799	0.464752	0.736292	0.997389	0.002611	0.234987	0.467363	0.72846	0.979112	0.45953	0.266319	0.274151	0.146597	0.073298	0.005236	0.002611	0.27154	0.498695	0.762402	1	0.015666	0.279373	0.469974	0.712794	0.89295	0.007833	0.18799	0.516971	0.817232	0.986945	0.532637	0.403141	0.005222	0.203655	0.472585	0.738903	0.971279	0.472585
0.1375	0.575	0.2875	0.240506	0.037975	0.278481	0.0375	0.1	0.45	0.6125	0.7875	0.025	0.3375	0.525	0.725	1	0.0125	0.1375	0.2375	0.8625	0.975	0.5	0.05	0.45	0.025316	0.050633	0	0.0125	0.3875	0.5125	0.6375	1	0.2875	0.2875	0.3	0.3125	0.325	0.0375	0.1375	0.75	0.8625	0.975	0.525	0.227848	0.05	0.175	0.3125	0.8125	0.95	0.5375
0.333333	0.374631	0.292035	0.248521	0.171598	0.210059	0.00885	0.256637	0.528024	0.728614	0.982301	0.035398	0.244838	0.471976	0.764012	1	0.00295	0.230088	0.486726	0.749263	0.99705	0.439528	0.365782	0.19469	0.156805	0.050296	0.002959	0.00295	0.277286	0.551622	0.752212	1	0.020649	0.362832	0.628319	0.825959	0.9941	0.038348	0.150442	0.306785	0.383481	0.882006	0.489676	0.39645	0.0059	0.20649	0.442478	0.719764	0.99705	0.380531
0.307888	0.413486	0.278626	0.257325	0.182166	0.221656	0.006361	0.217557	0.506361	0.737913	1	0.003817	0.250636	0.422392	0.69084	0.998728	0.001272	0.276081	0.581425	0.79771	0.997455	0.563613	0.204835	0.231552	0.086624	0.048408	0.007643	0.001272	0.273537	0.43257	0.711196	1	0.017812	0.1743	0.486005	0.669211	0.843511	0.033079	0.234097	0.725191	0.898219	0.994911	0.515267	0.35414	0.013995	0.272265	0.552163	0.79771	0.993639	0.399491
0.129496	0.374101	0.496403	0.123188	0.094203	0.333333	0.05036	0.201439	0.489209	0.690647	0.985612	0.014388	0.18705	0.438849	0.748201	1	0.007194	0.316547	0.532374	0.726619	0.971223	0.352518	0.244604	0.402878	0.050725	0.07971	0.036232	0.007194	0.143885	0.230216	0.661871	1	0.064748	0.52518	0.625899	0.726619	0.978417	0.05036	0.316547	0.417266	0.805755	0.913669	0.805755	0.217391	0.021583	0.280576	0.510791	0.71223	0.978417	0.395683
0.280148	0.397032	0.32282	0.217472	0.224907	0.224907	0.009276	0.270872	0.491651	0.742115	0.962894	0.003711	0.233766	0.504638	0.755102	0.994434	0.001855	0.241187	0.493506	0.74026	1	0.734694	0.165121	0.100186	0.066914	0.033457	0.007435	0.001855	0.313544	0.595547	0.788497	1	0.046382	0.244898	0.304267	0.48423	0.814471	0.003711	0.025974	0.333952	0.526902	0.985158	0.541744	0.442379	0.005566	0.215213	0.439703	0.686456	0.996289	0.447124
0.399038	0.259615	0.341346	0.178744	0.270531	0.15942	0.014423	0.278846	0.552885	0.774038	1	0.009615	0.182692	0.379808	0.625	0.975962	0.004808	0.274038	0.509615	0.759615	0.995192	0.394231	0.197115	0.408654	0.072464	0.082126	0.004831	0.004808	0.201923	0.375	0.75	1	0.024038	0.216346	0.317308	0.519231	0.802885	0.014423	0.413462	0.586538	0.850962	0.990385	0.538462	0.396135	0.009615	0.211538	0.451923	0.658654	0.995192	0.278846
0.314088	0.364896	0.321016	0.224537	0.208333	0.252315	0.004619	0.237875	0.526559	0.752887	1	0.011547	0.265589	0.482679	0.720554	0.995381	0.002309	0.233256	0.503464	0.769053	0.997691	0.524249	0.293303	0.182448	0.111111	0.046296	0.00463	0.002309	0.210162	0.48037	0.722864	1	0.053118	0.337182	0.605081	0.849885	0.997691	0.138568	0.281755	0.369515	0.570439	0.678984	0.593533	0.337963	0.013857	0.247113	0.501155	0.741339	0.997691	0.3903
0.330808	0.371212	0.29798	0.232911	0.2	0.248101	0.007576	0.234848	0.479798	0.755051	1	0.010101	0.262626	0.502525	0.732323	0.987374	0.002525	0.214646	0.482323	0.739899	0.997475	0.39899	0.113636	0.487374	0.050633	0.086076	0	0.002525	0.214646	0.462121	0.699495	1	0.156566	0.232323	0.558081	0.674242	0.868687	0.012626	0.285354	0.532828	0.767677	0.994949	0.616162	0.329114	0.012626	0.280303	0.494949	0.709596	0.987374	0.386364
0.322785	0.367089	0.310127	0.203822	0.191083	0.210191	0.031646	0.158228	0.56962	0.727848	0.892405	0.012658	0.259494	0.43038	0.613924	1	0.006329	0.335443	0.544304	0.803797	0.987342	0.329114	0.107595	0.563291	0.044586	0.082803	0.019108	0.006329	0.082278	0.259494	0.398734	1	0.132911	0.35443	0.379747	0.632911	0.917722	0.14557	0.443038	0.582278	0.791139	0.981013	0.56962	0.305732	0.025316	0.348101	0.506329	0.78481	0.987342	0.373418
0.305164	0.366197	0.328638	0.198113	0.235849	0.254717	0.051643	0.276995	0.460094	0.760563	0.99061	0.00939	0.183099	0.483568	0.685446	0.976526	0.004695	0.295775	0.525822	0.769953	1	0.211268	0.126761	0.661972	0.04717	0.084906	0.009434	0.004695	0.328638	0.474178	0.704225	1	0.150235	0.666667	0.812207	0.868545	0.910798	0.014085	0.206573	0.422535	0.619718	0.985915	0.474178	0.443396	0.028169	0.225352	0.511737	0.741784	0.981221	0.375587
0.385542	0.301205	0.313253	0.256098	0.243902	0.158537	0.036145	0.228916	0.46988	0.650602	1	0.024096	0.216867	0.53012	0.795181	0.987952	0.012048	0.301205	0.481928	0.722892	0.939759	0.277108	0	0.722892	0	0.04878	0	0.012048	0.060241	0.506024	0.578313	1	0	0	0	0	0	0.120482	0.289157	0.46988	0.771084	0.951807	0.337349	0.365854	0.144578	0.385542	0.662651	0.795181	0.927711	0.385542
0.326667	0.346667	0.326667	0.217391	0.210702	0.247492	0.01	0.293333	0.5	0.8	0.98	0.006667	0.22	0.533333	0.74	1	0.003333	0.236667	0.46	0.71	0.993333	0.393333	0.266667	0.34	0.107023	0.080268	0	0.003333	0.29	0.553333	0.796667	1	0.016667	0.113333	0.273333	0.523333	0.993333	0.2	0.376667	0.583333	0.826667	0.946667	0.646667	0.354515	0.006667	0.226667	0.456667	0.686667	0.993333	0.32
0.362694	0.321244	0.316062	0.166667	0.21875	0.223958	0.015544	0.341969	0.559585	0.709845	0.989637	0.010363	0.150259	0.46114	0.818653	1	0.005181	0.207254	0.450777	0.658031	0.994819	0.373057	0.139896	0.487047	0.0625	0.09375	0	0.005181	0.243523	0.595855	0.829016	1	0.031088	0.056995	0.450777	0.512953	0.813472	0.093264	0.26943	0.544041	0.689119	0.979275	0.544041	0.385417	0.025907	0.186528	0.430052	0.642487	0.917098	0.336788
0.346774	0.346774	0.306452	0.203252	0.252033	0.195122	0.032258	0.169355	0.387097	0.556452	0.943548	0.016129	0.233871	0.572581	0.798387	1	0.008065	0.25	0.596774	0.774194	0.983871	0.435484	0.241935	0.322581	0.073171	0.056911	0.00813	0.008065	0.370968	0.508065	0.733871	1	0.403226	0.629032	0.693548	0.798387	0.991935	0.032258	0.104839	0.25	0.330645	0.943548	0.459677	0.292683	0.056452	0.290323	0.637097	0.806452	0.975806	0.41129
0.385408	0.399142	0.215451	0.273196	0.145189	0.170103	0.002575	0.279828	0.511588	0.744206	1	0.001717	0.2	0.443777	0.700429	0.998283	0.000858	0.23176	0.573391	0.806009	0.995708	0.76824	0.127039	0.104721	0.061856	0.039519	0.005155	0.000858	0.252361	0.478112	0.700429	1	0.006009	0.507296	0.786266	0.87382	0.990558	0.002575	0.174249	0.412876	0.792275	0.96824	0.363948	0.340206	0.006867	0.223176	0.648927	0.793991	0.995708	0.420601
0.110553	0.552764	0.336683	0.121212	0.050505	0.414141	0.130653	0.21608	0.472362	0.819095	0.934673	0.015075	0.271357	0.517588	0.728643	0.994975	0.005025	0.251256	0.452261	0.78392	1	0.236181	0.005025	0.758794	0.005051	0.09596	0.005051	0.005025	0.135678	0.542714	0.628141	1	0.201005	0.201005	0.201005	0.201005	0.201005	0.040201	0.291457	0.487437	0.768844	0.98995	0.809045	0.171717	0.020101	0.256281	0.477387	0.733668	0.969849	0.562814
0.262391	0.399417	0.338192	0.184211	0.172515	0.30117	0.008746	0.218659	0.562682	0.784257	0.985423	0.005831	0.250729	0.495627	0.717201	0.997085	0.002915	0.259475	0.44898	0.731778	1	0.381924	0.163265	0.45481	0.064327	0.076023	0	0.002915	0.247813	0.533528	0.696793	1	0.023324	0.075802	0.326531	0.437318	0.874636	0.110787	0.291545	0.556851	0.763848	0.991254	0.667638	0.309942	0.011662	0.253644	0.437318	0.720117	0.988338	0.411079
0.363636	0.418182	0.218182	0.166667	0.240741	0.166667	0.236364	0.327273	0.490909	0.8	0.981818	0.018182	0.109091	0.363636	0.709091	1	0.090909	0.290909	0.472727	0.745455	0.945455	0.581818	0.145455	0.272727	0.037037	0.111111	0	0.018182	0.145455	0.545455	0.836364	1	0.690909	0.709091	0.745455	0.781818	0.818182	0.2	0.236364	0.345455	0.418182	0.927273	0.345455	0.444444	0.090909	0.290909	0.545455	0.745455	0.945455	0.545455
0.3	0.32	0.38	0.151515	0.222222	0.252525	0.02	0.41	0.57	0.72	1	0.04	0.19	0.44	0.8	0.99	0.01	0.25	0.39	0.65	0.94	0.61	0.21	0.18	0.070707	0.010101	0.010101	0.01	0.18	0.67	0.82	1	0.05	0.21	0.26	0.57	0.88	0.27	0.3	0.35	0.39	0.44	0.49	0.424242	0.04	0.24	0.39	0.62	0.94	0.37
0.347048	0.354204	0.298748	0.225806	0.21147	0.224014	0.012522	0.198569	0.466905	0.769231	0.998211	0.003578	0.273703	0.49195	0.694097	1	0.001789	0.300537	0.538462	0.790698	0.992844	0.432916	0.280859	0.286225	0.091398	0.037634	0.005376	0.001789	0.218247	0.416816	0.679785	1	0.227191	0.398927	0.576029	0.67263	0.992844	0.014311	0.123435	0.681574	0.754919	0.88551	0.57424	0.304659	0.017889	0.329159	0.497317	0.68873	0.992844	0.355993
0.365079	0.365079	0.269841	0.213636	0.268182	0.152273	0.027211	0.353741	0.54195	0.752834	0.986395	0.011338	0.145125	0.328798	0.68254	1	0.002268	0.276644	0.521542	0.811791	0.995465	0.292517	0.092971	0.614512	0.036364	0.031818	0	0.002268	0.079365	0.156463	0.365079	1	0.004535	0.387755	0.938776	0.965986	0.995465	0.204082	0.405896	0.598639	0.755102	0.909297	0.485261	0.45	0.004535	0.151927	0.385488	0.666667	0.995465	0.394558
0.375	0.309524	0.315476	0.215569	0.191617	0.263473	0.017857	0.238095	0.5	0.791667	0.994048	0.011905	0.244048	0.505952	0.755952	0.964286	0.005952	0.232143	0.458333	0.690476	1	0.446429	0.309524	0.244048	0.113772	0.065868	0.005988	0.005952	0.315476	0.559524	0.809524	1	0.029762	0.130952	0.464286	0.714286	0.982143	0.166667	0.220238	0.339286	0.613095	0.827381	0.52381	0.383234	0.029762	0.25	0.470238	0.696429	0.970238	0.297619
0.448276	0.229885	0.321839	0.209302	0.27907	0.209302	0.045977	0.183908	0.45977	0.689655	0.988506	0.022989	0.264368	0.528736	0.770115	0.942529	0.011494	0.195402	0.517241	0.827586	1	0.37931	0.08046	0.54023	0.034884	0.104651	0.011628	0.011494	0.287356	0.436782	0.724138	1	0.333333	0.333333	0.356322	0.505747	0.528736	0.045977	0.16092	0.586207	0.793103	0.965517	0.356322	0.372093	0.068966	0.333333	0.563218	0.816092	0.965517	0.218391
0.455556	0.277778	0.266667	0.256506	0.237918	0.167286	0.007407	0.255556	0.522222	0.748148	1	0.011111	0.259259	0.437037	0.777778	0.974074	0.003704	0.2	0.481481	0.718519	0.981481	0.466667	0.274074	0.259259	0.078067	0.048327	0.003717	0.003704	0.274074	0.496296	0.788889	1	0.307407	0.425926	0.618519	0.837037	0.962963	0.011111	0.07037	0.192593	0.6	0.781481	0.42963	0.379182	0.014815	0.240741	0.444444	0.711111	0.97037	0.292593
0.414013	0.248408	0.33758	0.191693	0.284345	0.159744	0.009554	0.257962	0.522293	0.72293	1	0.022293	0.210191	0.449045	0.792994	0.990446	0.003185	0.251592	0.5	0.738854	0.996815	0.410828	0.073248	0.515924	0.038339	0.083067	0.025559	0.003185	0.181529	0.302548	0.89172	1	0.012739	0.076433	0.242038	0.850318	0.88535	0.035032	0.401274	0.557325	0.72293	0.93949	0.429936	0.357827	0.012739	0.264331	0.452229	0.713376	0.974522	0.292994
0.240476	0.32381	0.435714	0.152745	0.183771	0.300716	0.004762	0.240476	0.488095	0.771429	1	0.007143	0.221429	0.538095	0.769048	0.992857	0.002381	0.261905	0.490476	0.72381	0.997619	0.240476	0.007143	0.752381	0.004773	0.090692	0	0.002381	0.32381	0.583333	0.795238	1	0.6	0.6	0.6	0.602381	0.604762	0.004762	0.245238	0.459524	0.740476	0.985714	0.688095	0.238663	0.009524	0.230952	0.459524	0.735714	0.995238	0.309524
0.319366	0.361268	0.319366	0.22449	0.171202	0.260771	0.003398	0.210646	0.431484	0.702152	1	0.002265	0.249151	0.516421	0.762174	0.997735	0.001133	0.285391	0.539071	0.755379	0.99547	0.325028	0.053228	0.621744	0.021542	0.103175	0.001134	0.001133	0.257078	0.502831	0.804077	1	0.141563	0.428086	0.911665	0.935447	0.989807	0.00453	0.238958	0.473386	0.685164	0.98188	0.639864	0.30839	0.007928	0.311438	0.546999	0.778029	0.99547	0.375991
0.275956	0.368852	0.355191	0.164384	0.186301	0.284932	0.010929	0.196721	0.491803	0.789617	0.997268	0.005464	0.29235	0.535519	0.737705	0.994536	0.002732	0.243169	0.459016	0.704918	1	0.393443	0.122951	0.483607	0.057534	0.09589	0.00274	0.002732	0.229508	0.469945	0.781421	1	0.040984	0.112022	0.245902	0.456284	0.953552	0.010929	0.303279	0.581967	0.765027	0.934426	0.614754	0.350685	0.032787	0.270492	0.510929	0.699454	0.983607	0.404372
0.320588	0.388235	0.291176	0.212389	0.176991	0.259587	0.005882	0.191176	0.467647	0.691176	0.997059	0.008824	0.329412	0.567647	0.776471	0.994118	0.002941	0.197059	0.435294	0.755882	1	0.464706	0.158824	0.376471	0.091445	0.073746	0.00295	0.002941	0.323529	0.526471	0.752941	1	0.238235	0.676471	0.847059	0.891176	0.997059	0.011765	0.117647	0.282353	0.541176	0.970588	0.573529	0.353982	0.008824	0.261765	0.517647	0.779412	0.991176	0.397059
0.230964	0.36802	0.401015	0.167939	0.155216	0.315522	0.007614	0.230964	0.558376	0.850254	1	0.01269	0.236041	0.48731	0.751269	0.989848	0.002538	0.256345	0.479695	0.677665	0.994924	0.373096	0.119289	0.507614	0.058524	0.048346	0.007634	0.002538	0.230964	0.568528	0.873096	1	0.020305	0.045685	0.121827	0.649746	0.982234	0.017766	0.281726	0.464467	0.672589	0.959391	0.664975	0.274809	0.015228	0.258883	0.472081	0.687817	0.982234	0.35533
0.400552	0.29558	0.303867	0.238227	0.216066	0.171745	0.030387	0.312155	0.530387	0.765193	0.997238	0.01105	0.196133	0.447514	0.729282	0.991713	0.002762	0.190608	0.461326	0.712707	1	0.458564	0.016575	0.524862	0.027701	0.121884	0.00554	0.002762	0.179558	0.472376	0.751381	1	0.016575	0.016575	0.433702	0.596685	0.922652	0.013812	0.337017	0.527624	0.729282	0.991713	0.497238	0.426593	0.008287	0.201657	0.453039	0.723757	0.991713	0.328729
0.366995	0.347291	0.285714	0.246914	0.190123	0.22716	0.017241	0.253695	0.497537	0.753695	1	0.004926	0.256158	0.514778	0.761084	0.997537	0.002463	0.224138	0.485222	0.669951	0.987685	0.495074	0.194581	0.310345	0.074074	0.064198	0	0.002463	0.261084	0.517241	0.758621	1	0.054187	0.133005	0.332512	0.504926	0.756158	0.14532	0.231527	0.591133	0.889163	0.992611	0.497537	0.335802	0.012315	0.238916	0.428571	0.647783	0.987685	0.396552
0.372573	0.365291	0.262136	0.241798	0.218712	0.193196	0.003641	0.260922	0.520631	0.781553	1	0.007282	0.203883	0.479369	0.740291	0.998786	0.001214	0.276699	0.48665	0.713592	0.997573	0.383495	0.003641	0.612864	0	0.102066	0.00486	0.001214	0.112864	0.417476	0.894417	1	0.214806	0.214806	0.214806	0.217233	0.218447	0.035194	0.330097	0.51335	0.703883	0.991505	0.519417	0.388821	0.006068	0.245146	0.476942	0.694175	0.997573	0.373786
0.348365	0.335964	0.315671	0.225734	0.235892	0.21219	0.003382	0.259301	0.494927	0.726043	1	0.002255	0.208568	0.487035	0.759865	0.996618	0.001127	0.249154	0.53664	0.767756	0.997745	0.42841	0.142052	0.429538	0.047404	0.074492	0	0.001127	0.184893	0.419391	0.669673	1	0.006764	0.10372	0.245772	0.711387	0.877114	0.039459	0.396843	0.600902	0.824126	0.997745	0.534386	0.408578	0.007892	0.264938	0.54115	0.775648	0.997745	0.354002
0.322165	0.340206	0.337629	0.217054	0.250646	0.217054	0.005155	0.201031	0.520619	0.793814	1	0.015464	0.260309	0.448454	0.680412	0.987113	0.002577	0.280928	0.533505	0.742268	0.997423	0.396907	0.108247	0.494845	0.041344	0.082687	0.005168	0.002577	0.257732	0.453608	0.75	1	0.206186	0.28866	0.613402	0.768041	0.904639	0.010309	0.216495	0.533505	0.731959	0.992268	0.569588	0.341085	0.015464	0.304124	0.510309	0.703608	0.992268	0.378866
0.345794	0.261682	0.392523	0.198113	0.292453	0.188679	0.018692	0.317757	0.457944	0.719626	0.981308	0.028037	0.186916	0.485981	0.728972	1	0.009346	0.168224	0.495327	0.757009	0.990654	0.439252	0.224299	0.336449	0.113208	0.056604	0	0.009346	0.373832	0.495327	0.794393	1	0.28972	0.663551	0.747664	0.859813	0.990654	0.018692	0.093458	0.17757	0.523364	0.607477	0.495327	0.377358	0.046729	0.158879	0.439252	0.738318	0.971963	0.299065
0.353383	0.315789	0.330827	0.184906	0.196226	0.25283	0.018797	0.259398	0.522556	0.804511	1	0.007519	0.263158	0.488722	0.672932	0.996241	0.003759	0.221805	0.466165	0.744361	0.992481	0.503759	0.135338	0.360902	0.05283	0.090566	0	0.003759	0.199248	0.43985	0.669173	1	0.011278	0.071429	0.176692	0.778195	0.902256	0.041353	0.394737	0.609023	0.845865	0.992481	0.62782	0.34717	0.011278	0.285714	0.507519	0.718045	0.992481	0.319549
0.383966	0.367089	0.248945	0.292373	0.173729	0.169492	0.008439	0.28692	0.523207	0.755274	0.987342	0.016878	0.227848	0.421941	0.71308	1	0.004219	0.181435	0.506329	0.742616	0.991561	0.670886	0.194093	0.135021	0.038136	0.029661	0.004237	0.004219	0.236287	0.443038	0.611814	1	0.303797	0.632911	0.704641	0.767932	0.894515	0.008439	0.037975	0.07173	0.924051	0.978903	0.485232	0.355932	0.016878	0.223629	0.468354	0.746835	0.987342	0.367089
0.150943	0.314465	0.534591	0.107595	0.14557	0.360759	0.044025	0.207547	0.553459	0.792453	0.993711	0.012579	0.220126	0.471698	0.710692	0.968553	0.006289	0.257862	0.477987	0.742138	1	0.138365	0.050314	0.811321	0.031646	0.031646	0.006329	0.006289	0.371069	0.805031	0.924528	1	0.811321	0.81761	0.962264	0.974843	0.987421	0.025157	0.220126	0.440252	0.641509	0.893082	0.767296	0.227848	0.018868	0.220126	0.490566	0.742138	0.974843	0.314465
0.242489	0.418455	0.339056	0.212903	0.156989	0.28172	0.006438	0.324034	0.596567	0.811159	0.995708	0.004292	0.182403	0.437768	0.708155	0.98927	0.002146	0.311159	0.527897	0.718884	1	0.407725	0.081545	0.51073	0.04086	0.066667	0.006452	0.002146	0.109442	0.33691	0.748927	1	0.083691	0.317597	0.761803	0.890558	0.974249	0.143777	0.351931	0.5	0.667382	0.939914	0.678112	0.283871	0.015021	0.26824	0.450644	0.675966	0.987124	0.429185
0.353741	0.363946	0.282313	0.235495	0.21843	0.187713	0.006803	0.312925	0.564626	0.795918	1	0.034014	0.217687	0.438776	0.690476	0.989796	0.003401	0.173469	0.469388	0.761905	0.993197	0.55102	0.231293	0.217687	0.085324	0.037543	0.003413	0.003401	0.27551	0.517007	0.693878	1	0.098639	0.248299	0.459184	0.768707	0.989796	0.006803	0.057823	0.486395	0.819728	0.952381	0.455782	0.313993	0.017007	0.251701	0.42517	0.761905	0.993197	0.35034
0.246847	0.385586	0.367568	0.18231	0.146209	0.268953	0.003604	0.362162	0.581982	0.866667	0.989189	0.010811	0.227027	0.484685	0.727928	0.998198	0.001802	0.223423	0.481081	0.695495	1	0.322523	0.034234	0.643243	0.009025	0.077617	0.005415	0.001802	0.358559	0.706306	0.90991	1	0.010811	0.016216	0.511712	0.699099	0.926126	0.007207	0.232432	0.437838	0.636036	0.922523	0.69009	0.176895	0.007207	0.212613	0.473874	0.677477	0.994595	0.38018
0.3056	0.3824	0.312	0.198718	0.201923	0.229167	0.0112	0.2352	0.488	0.7744	0.9936	0.0032	0.2624	0.5024	0.7568	1	0.0016	0.192	0.4944	0.7136	0.9968	0.5744	0.0832	0.3424	0.028846	0.080128	0.00641	0.0016	0.2624	0.5344	0.8208	1	0.0048	0.3744	0.4592	0.5968	0.9568	0.016	0.1216	0.4768	0.704	0.9952	0.4896	0.320513	0.0032	0.2368	0.5088	0.6784	0.9968	0.424
0.375358	0.446991	0.17765	0.298851	0.12069	0.149425	0.017192	0.22063	0.487106	0.713467	0.994269	0.005731	0.30086	0.52149	0.7851	0.991404	0.002865	0.186246	0.401146	0.573066	1	0.770774	0.034384	0.194842	0.020115	0.037356	0.002874	0.002865	0.255014	0.587393	0.77937	1	0.011461	0.194842	0.553009	0.561605	0.570201	0.091691	0.163324	0.30086	0.429799	0.962751	0.289398	0.333333	0.008596	0.272206	0.507163	0.722063	0.962751	0.487106
0.321285	0.429719	0.248996	0.25	0.125	0.217742	0.016064	0.37751	0.562249	0.783133	1	0.012048	0.212851	0.518072	0.718876	0.995984	0.004016	0.13253	0.321285	0.64257	0.955823	0.586345	0.056225	0.35743	0.032258	0.080645	0	0.004016	0.413655	0.598394	0.823293	1	0.502008	0.60241	0.795181	0.807229	0.863454	0.016064	0.120482	0.313253	0.405622	0.959839	0.349398	0.25	0.044177	0.128514	0.301205	0.554217	0.971888	0.429719
0.348485	0.340909	0.310606	0.236641	0.221374	0.19084	0.015152	0.318182	0.515152	0.666667	0.954545	0.030303	0.234848	0.401515	0.734848	0.992424	0.007576	0.181818	0.507576	0.75	1	0.363636	0.136364	0.5	0.068702	0.038168	0.007634	0.007576	0.143939	0.295455	0.621212	1	0.030303	0.05303	0.166667	0.242424	0.659091	0.310606	0.462121	0.674242	0.795455	0.924242	0.492424	0.366412	0.030303	0.19697	0.477273	0.727273	0.962121	0.318182
0.299744	0.398465	0.30179	0.214432	0.181679	0.223644	0.001535	0.235806	0.493095	0.741688	0.997954	0.003069	0.272634	0.520716	0.779028	0.999488	0.000512	0.232225	0.480818	0.712532	1	0.582097	0.347826	0.070077	0.106448	0.018424	0.002047	0.000512	0.268542	0.544246	0.794373	1	0.004092	0.195908	0.376471	0.564194	0.99335	0.001535	0.719182	0.802558	0.88491	0.97954	0.451662	0.384852	0.001023	0.235294	0.467519	0.695652	0.992839	0.422506
0.265306	0.441327	0.293367	0.232737	0.15601	0.263427	0.020408	0.227041	0.571429	0.72449	0.989796	0.005102	0.25	0.454082	0.765306	0.997449	0.002551	0.252551	0.487245	0.727041	1	0.339286	0.221939	0.438776	0.058824	0.053708	0.002558	0.002551	0.232143	0.408163	0.594388	1	0.07398	0.147959	0.318878	0.571429	0.994898	0.022959	0.390306	0.640306	0.765306	0.94898	0.586735	0.363171	0.022959	0.270408	0.471939	0.75	0.994898	0.441327
0.306075	0.404206	0.28972	0.234192	0.185012	0.229508	0.016355	0.28271	0.488318	0.700935	1	0.004673	0.233645	0.441589	0.731308	0.990654	0.002336	0.198598	0.593458	0.824766	0.997664	0.492991	0.233645	0.273364	0.098361	0.056206	0.004684	0.002336	0.221963	0.376168	0.67757	1	0.007009	0.11215	0.525701	0.815421	0.932243	0.198598	0.490654	0.602804	0.761682	0.995327	0.481308	0.309133	0.014019	0.364486	0.626168	0.827103	0.995327	0.415888
0.202797	0.377622	0.41958	0.112676	0.140845	0.338028	0.020979	0.090909	0.461538	0.881119	0.986014	0.013986	0.251748	0.503497	0.748252	0.951049	0.006993	0.265734	0.496503	0.699301	1	0.272727	0.076923	0.65035	0.028169	0.028169	0	0.006993	0.335664	0.832168	0.902098	1	0.363636	0.370629	0.391608	0.916084	0.937063	0.055944	0.20979	0.482517	0.643357	0.811189	0.685315	0.267606	0.062937	0.244755	0.503497	0.678322	0.951049	0.398601
0.233083	0.355263	0.411654	0.135593	0.146893	0.310734	0.005639	0.263158	0.505639	0.789474	0.994361	0.003759	0.231203	0.468045	0.744361	1	0.00188	0.25188	0.531955	0.727444	0.996241	0.293233	0.033835	0.672932	0.013183	0.077213	0.00565	0.00188	0.144737	0.424812	0.618421	1	0.056391	0.090226	0.221805	0.413534	0.422932	0.022556	0.302632	0.586466	0.766917	0.994361	0.75188	0.165725	0.011278	0.25188	0.488722	0.736842	0.996241	0.359023
0.426174	0.281879	0.291946	0.205042	0.231933	0.186555	0.006711	0.364094	0.592282	0.770134	0.994966	0.003356	0.182886	0.417785	0.746644	1	0.001678	0.221477	0.387584	0.692953	0.998322	0.268456	0.077181	0.654362	0.036975	0.047059	0.010084	0.001678	0.171141	0.364094	0.916107	1	0.067114	0.35906	0.397651	0.439597	0.994966	0.005034	0.290268	0.598993	0.761745	0.968121	0.36745	0.373109	0.005034	0.194631	0.342282	0.600671	0.998322	0.286913
0.328571	0.328571	0.342857	0.210526	0.239234	0.22488	0.02381	0.214286	0.519048	0.704762	0.980952	0.009524	0.295238	0.485714	0.8	1	0.004762	0.228571	0.471429	0.714286	0.961905	0.3	0.104762	0.595238	0.047847	0.105263	0	0.004762	0.22381	0.380952	0.738095	1	0.019048	0.038095	0.161905	0.280952	0.72381	0.061905	0.390476	0.571429	0.780952	0.971429	0.590476	0.344498	0.019048	0.247619	0.447619	0.719048	0.97619	0.333333
0.33441	0.384491	0.281099	0.242718	0.20712	0.224919	0.004847	0.224556	0.49273	0.736672	0.988691	0.008078	0.252019	0.510501	0.783522	1	0.001616	0.253635	0.489499	0.714055	0.982229	0.410339	0.169628	0.420032	0.058252	0.07767	0.003236	0.001616	0.156704	0.432956	0.668821	1	0.098546	0.329564	0.66559	0.825525	0.925687	0.004847	0.28433	0.512116	0.723748	0.993538	0.589661	0.385113	0.008078	0.25525	0.471729	0.686591	0.991922	0.407108
0.34767	0.336918	0.315412	0.223022	0.23741	0.208633	0.007168	0.250896	0.491039	0.731183	0.996416	0.010753	0.200717	0.451613	0.716846	0.989247	0.003584	0.286738	0.519713	0.78853	1	0.541219	0.164875	0.293907	0.079137	0.071942	0.014388	0.003584	0.175627	0.408602	0.634409	1	0.02509	0.519713	0.792115	0.870968	0.928315	0.050179	0.290323	0.46595	0.716846	0.992832	0.505376	0.395683	0.017921	0.308244	0.526882	0.738351	0.989247	0.354839
0.387097	0.327189	0.285714	0.240741	0.222222	0.189815	0.018433	0.239631	0.419355	0.635945	0.990783	0.009217	0.202765	0.557604	0.815668	1	0.004608	0.281106	0.539171	0.741935	0.986175	0.322581	0.142857	0.534562	0.060185	0.060185	0.00463	0.004608	0.165899	0.59447	0.834101	1	0.073733	0.124424	0.884793	0.949309	0.986175	0.009217	0.308756	0.442396	0.589862	0.815668	0.442396	0.37037	0.023041	0.184332	0.516129	0.78341	0.986175	0.336406
0.308008	0.37577	0.316222	0.1893	0.226337	0.213992	0.00616	0.305955	0.554415	0.792608	0.997947	0.008214	0.190965	0.420945	0.73306	0.99384	0.002053	0.275154	0.517454	0.747433	1	0.537988	0.069815	0.392197	0.022634	0.092593	0.002058	0.002053	0.2423	0.466119	0.790554	1	0.164271	0.178645	0.75154	0.862423	0.985626	0.016427	0.26694	0.517454	0.655031	0.99384	0.552361	0.403292	0.008214	0.223819	0.50924	0.743326	0.989733	0.392197
0.274168	0.394612	0.33122	0.201587	0.179365	0.273016	0.007924	0.226624	0.510301	0.776545	0.995246	0.00317	0.255151	0.499208	0.692552	1	0.001585	0.242472	0.481775	0.767036	0.998415	0.434231	0.277338	0.288431	0.112698	0.065079	0.007937	0.001585	0.256735	0.521395	0.736926	1	0.004754	0.488114	0.706815	0.846276	0.998415	0.009509	0.134707	0.288431	0.451664	0.946117	0.698891	0.307937	0.006339	0.275753	0.48336	0.713154	0.99683	0.364501
0.301105	0.38674	0.312155	0.218837	0.188366	0.229917	0.005525	0.314917	0.555249	0.81768	1	0.008287	0.19337	0.411602	0.712707	0.98895	0.002762	0.270718	0.502762	0.685083	0.997238	0.497238	0.052486	0.450276	0.030471	0.063712	0.00831	0.002762	0.168508	0.375691	0.823204	1	0.016575	0.024862	0.212707	0.400552	0.922652	0.033149	0.422652	0.555249	0.68232	0.994475	0.627072	0.304709	0.01105	0.301105	0.51105	0.70442	0.997238	0.364641
0.301939	0.390582	0.307479	0.205556	0.2	0.227778	0.024931	0.232687	0.448753	0.731302	0.99723	0.00554	0.307479	0.609418	0.781163	0.975069	0.00277	0.193906	0.429363	0.65374	1	0.592798	0.066482	0.34072	0.019444	0.063889	0.002778	0.00277	0.296399	0.695291	0.850416	1	0.00554	0.019391	0.041551	0.246537	0.581717	0.113573	0.279778	0.443213	0.534626	0.819945	0.398892	0.316667	0.00554	0.246537	0.421053	0.592798	0.977839	0.385042
0.38	0.23	0.39	0.170854	0.301508	0.175879	0.015	0.175	0.455	0.68	0.99	0.025	0.305	0.575	0.81	1	0.005	0.28	0.51	0.755	0.995	0.385	0.24	0.375	0.065327	0.075377	0.025126	0.005	0.18	0.465	0.74	1	0.015	0.24	0.675	0.91	0.99	0.055	0.3	0.425	0.57	0.845	0.565	0.371859	0.01	0.3	0.495	0.75	0.985	0.28
0.292929	0.491582	0.215488	0.310811	0.10473	0.189189	0.010101	0.286195	0.538721	0.744108	1	0.006734	0.299663	0.498316	0.804714	0.996633	0.003367	0.151515	0.279461	0.589226	0.939394	0.740741	0.037037	0.222222	0.027027	0.013514	0	0.003367	0.387205	0.589226	0.804714	1	0.255892	0.259259	0.441077	0.558923	0.83165	0.030303	0.080808	0.138047	0.191919	0.632997	0.333333	0.304054	0.03367	0.144781	0.309764	0.592593	0.952862	0.488215
0.278689	0.245902	0.47541	0.116667	0.316667	0.166667	0.032787	0.377049	0.557377	0.754098	0.95082	0.081967	0.295082	0.442623	0.672131	1	0.016393	0.147541	0.311475	0.721311	0.983607	0.442623	0.081967	0.47541	0.033333	0.1	0	0.016393	0.409836	0.52459	0.803279	1	0.918033	0.918033	0.934426	0.95082	0.983607	0.04918	0.147541	0.262295	0.622951	0.786885	0.491803	0.433333	0.04918	0.163934	0.311475	0.639344	0.934426	0.377049
0.321637	0.368421	0.309942	0.170588	0.194118	0.252941	0.02924	0.298246	0.584795	0.80117	0.994152	0.011696	0.187135	0.450292	0.660819	0.964912	0.005848	0.210526	0.432749	0.748538	1	0.397661	0.19883	0.403509	0.076471	0.076471	0.041176	0.005848	0.192982	0.362573	0.783626	1	0.046784	0.152047	0.309942	0.853801	0.994152	0.070175	0.409357	0.526316	0.625731	0.877193	0.51462	0.458824	0.023392	0.204678	0.438596	0.695906	0.982456	0.426901
0.242152	0.428251	0.329596	0.220225	0.161798	0.321348	0.042601	0.295964	0.522422	0.690583	0.993274	0.004484	0.264574	0.488789	0.721973	1	0.002242	0.188341	0.479821	0.829596	0.997758	0.349776	0.192825	0.457399	0.065169	0.074157	0.006742	0.002242	0.275785	0.466368	0.650224	1	0.071749	0.150224	0.41704	0.600897	0.699552	0.004484	0.23991	0.713004	0.852018	0.997758	0.598655	0.332584	0.008969	0.235426	0.515695	0.809417	0.995516	0.430493
0.411565	0.363946	0.22449	0.255973	0.174061	0.143345	0.020408	0.292517	0.578231	0.785714	0.982993	0.006803	0.217687	0.42517	0.765306	1	0.003401	0.231293	0.411565	0.605442	0.911565	0.384354	0.030612	0.585034	0.017065	0.064846	0.003413	0.003401	0.14966	0.360544	0.506803	1	0.163265	0.166667	0.326531	0.333333	0.989796	0.088435	0.29932	0.612245	0.758503	0.931973	0.29932	0.341297	0.102041	0.255102	0.455782	0.622449	0.986395	0.387755
0.374502	0.346614	0.278884	0.248	0.204	0.232	0.007968	0.282869	0.525896	0.796813	1	0.015936	0.199203	0.517928	0.749004	0.988048	0.003984	0.247012	0.438247	0.63745	0.984064	0.517928	0.047809	0.434263	0.02	0.116	0.02	0.003984	0.306773	0.653386	0.796813	1	0.123506	0.131474	0.561753	0.577689	0.944223	0.01992	0.247012	0.378486	0.537849	0.98008	0.486056	0.4	0.011952	0.318725	0.501992	0.685259	0.984064	0.346614
0.271715	0.429844	0.298441	0.216518	0.178571	0.274554	0.004454	0.253898	0.525612	0.788419	1	0.008909	0.216036	0.478842	0.737194	0.988864	0.002227	0.247216	0.476615	0.721604	0.991091	0.416481	0.242762	0.340757	0.113839	0.078125	0.002232	0.002227	0.269488	0.530067	0.746102	1	0.017817	0.305122	0.536748	0.777283	0.944321	0.033408	0.184855	0.412027	0.712695	0.995546	0.641425	0.388393	0.008909	0.240535	0.501114	0.76392	0.991091	0.445434
0.290698	0.406977	0.302326	0.226107	0.181818	0.249417	0.009302	0.248837	0.488372	0.769767	1	0.004651	0.251163	0.476744	0.744186	0.995349	0.002326	0.223256	0.509302	0.734884	0.993023	0.465116	0.172093	0.362791	0.053613	0.072261	0.006993	0.002326	0.132558	0.539535	0.867442	1	0.097674	0.262791	0.5	0.734884	0.855814	0.060465	0.327907	0.486047	0.623256	0.986047	0.576744	0.321678	0.006977	0.230233	0.434884	0.65814	0.981395	0.469767
0.397906	0.314136	0.287958	0.278947	0.257895	0.184211	0.010471	0.235602	0.486911	0.691099	0.926702	0.015707	0.225131	0.570681	0.801047	0.994764	0.005236	0.251309	0.471204	0.780105	1	0.403141	0.026178	0.570681	0.015789	0.1	0.005263	0.005236	0.17801	0.502618	0.790576	1	0.712042	0.712042	0.717277	0.722513	0.82199	0.036649	0.267016	0.455497	0.643979	0.989529	0.366492	0.463158	0.031414	0.267016	0.47644	0.717277	0.984293	0.324607
0.2589	0.278317	0.462783	0.142857	0.233766	0.246753	0.012945	0.278317	0.553398	0.822006	0.996764	0.016181	0.262136	0.466019	0.724919	0.97411	0.003236	0.216828	0.443366	0.71521	1	0.158576	0.093851	0.747573	0.029221	0.042208	0.00974	0.003236	0.488673	0.66343	0.851133	1	0.006472	0.02589	0.828479	0.970874	0.996764	0.042071	0.223301	0.427184	0.669903	0.951456	0.734628	0.233766	0.009709	0.213592	0.433657	0.695793	0.990291	0.262136
0.298429	0.329843	0.371728	0.194226	0.223097	0.257218	0.007853	0.248691	0.494764	0.764398	1	0.005236	0.235602	0.460733	0.691099	0.986911	0.002618	0.243455	0.52356	0.751309	0.997382	0.502618	0.39267	0.104712	0.125984	0.015748	0	0.002618	0.277487	0.536649	0.767016	1	0.149215	0.348168	0.565445	0.780105	0.994764	0.015707	0.04712	0.073298	0.104712	0.13089	0.594241	0.304462	0.010471	0.303665	0.513089	0.751309	0.997382	0.366492
0.432624	0.301925	0.265451	0.220081	0.229209	0.165314	0.00304	0.25228	0.588652	0.771023	1	0.002026	0.273556	0.502533	0.876393	0.997974	0.001013	0.208713	0.403242	0.601824	0.989868	0.264438	0.013171	0.722391	0.006085	0.052738	0.002028	0.001013	0.342452	0.545086	0.933131	1	0.133739	0.471125	0.503546	0.506586	0.514691	0.007092	0.213779	0.475177	0.694022	0.899696	0.365755	0.401623	0.004053	0.201621	0.362715	0.561297	0.989868	0.315096
0.326316	0.347368	0.326316	0.148936	0.297872	0.223404	0.063158	0.2	0.389474	0.621053	0.978947	0.021053	0.305263	0.568421	0.789474	1	0.010526	0.168421	0.421053	0.726316	0.968421	0.568421	0.378947	0.052632	0.223404	0.010638	0.010638	0.010526	0.242105	0.463158	0.768421	1	0.052632	0.284211	0.578947	0.747368	0.978947	0.073684	0.073684	0.084211	0.094737	0.115789	0.389474	0.553191	0.052632	0.252632	0.473684	0.694737	0.968421	0.4
0.241935	0.43871	0.319355	0.200647	0.18123	0.278317	0.016129	0.23871	0.503226	0.764516	0.983871	0.009677	0.245161	0.483871	0.725806	0.996774	0.003226	0.235484	0.53871	0.767742	1	0.274194	0	0.725806	0	0.10356	0	0.003226	0.190323	0.496774	0.796774	1	0	0	0	0	0	0.041935	0.274194	0.483871	0.735484	0.964516	0.754839	0.135922	0.006452	0.274194	0.522581	0.745161	0.993548	0.451613
0.227139	0.359882	0.412979	0.150888	0.177515	0.304734	0.0059	0.230088	0.566372	0.80531	1	0.011799	0.283186	0.492625	0.705015	0.9941	0.00295	0.238938	0.474926	0.746313	0.99705	0.20059	0.00295	0.79646	0.005917	0.053254	0	0.00295	0.286136	0.510324	0.563422	1	0.530973	0.530973	0.530973	0.530973	0.530973	0.014749	0.241888	0.492625	0.772861	0.9941	0.722714	0.213018	0.011799	0.238938	0.460177	0.728614	0.99705	0.312684
0.254011	0.350267	0.395722	0.168901	0.152815	0.300268	0.010695	0.278075	0.513369	0.847594	0.994652	0.005348	0.229947	0.47861	0.76738	1	0.002674	0.235294	0.473262	0.68984	0.957219	0.283422	0.029412	0.687166	0.018767	0.0563	0.002681	0.002674	0.173797	0.430481	0.914439	1	0.010695	0.045455	0.053476	0.192513	0.957219	0.042781	0.286096	0.510695	0.681818	0.986631	0.649733	0.203753	0.008021	0.240642	0.467914	0.676471	0.975936	0.299465
0.294574	0.426357	0.27907	0.249027	0.194553	0.217899	0.007752	0.263566	0.484496	0.744186	0.996124	0.027132	0.248062	0.511628	0.736434	0.988372	0.003876	0.213178	0.503876	0.751938	1	0.608527	0.282946	0.108527	0.116732	0.038911	0	0.003876	0.217054	0.468992	0.713178	1	0.093023	0.496124	0.651163	0.860465	0.992248	0.011628	0.034884	0.232558	0.25969	0.290698	0.631783	0.311284	0.015504	0.321705	0.554264	0.748062	0.992248	0.426357
0.491124	0.272189	0.236686	0.303571	0.238095	0.125	0.029586	0.260355	0.508876	0.727811	1	0.011834	0.201183	0.449704	0.745562	0.988166	0.005917	0.242604	0.455621	0.804734	0.976331	0.331361	0.023669	0.64497	0.047619	0.083333	0	0.005917	0.230769	0.633136	0.846154	1	0.153846	0.153846	0.366864	0.668639	0.881657	0.029586	0.272189	0.485207	0.698225	0.952663	0.420118	0.5	0.011834	0.224852	0.431953	0.704142	0.976331	0.331361
0.136364	0.530303	0.333333	0.138462	0.061538	0.323077	0.030303	0.045455	0.166667	0.651515	1	0.060606	0.333333	0.636364	0.833333	0.969697	0.015152	0.151515	0.348485	0.454545	0.757576	0.378788	0	0.621212	0	0.153846	0	0.015152	0.136364	0.727273	0.863636	1	0	0	0	0	0	0.090909	0.272727	0.424242	0.606061	0.954545	0.530303	0.338462	0.060606	0.227273	0.363636	0.515152	0.848485	0.484848
0.344633	0.363465	0.291902	0.239623	0.198113	0.226415	0.009416	0.265537	0.527307	0.747646	0.996234	0.003766	0.218456	0.480226	0.783427	1	0.001883	0.256121	0.483992	0.709981	0.998117	0.408663	0.103578	0.487759	0.056604	0.113208	0.003774	0.001883	0.220339	0.493409	0.719397	1	0.180791	0.393597	0.487759	0.709981	0.962335	0.003766	0.252354	0.525424	0.768362	0.996234	0.596987	0.377358	0.007533	0.258004	0.489642	0.728814	0.998117	0.391714
0.317121	0.406615	0.276265	0.263158	0.187135	0.189084	0.007782	0.287938	0.513619	0.747082	1	0.003891	0.22179	0.48249	0.714008	0.976654	0.001946	0.223735	0.486381	0.766537	0.994163	0.501946	0.178988	0.319066	0.066277	0.066277	0	0.001946	0.2607	0.457198	0.696498	1	0.060311	0.27821	0.451362	0.766537	0.996109	0.005837	0.227626	0.575875	0.772374	0.924125	0.554475	0.374269	0.009728	0.247082	0.498054	0.750973	0.994163	0.406615
0.168739	0.39254	0.438721	0.122776	0.117438	0.329181	0.007105	0.206039	0.433393	0.731794	1	0.01421	0.232682	0.492007	0.742451	0.989343	0.001776	0.268206	0.541741	0.77087	0.996448	0.328597	0.031972	0.639432	0.016014	0.080071	0.005338	0.001776	0.307282	0.48135	0.674956	1	0.300178	0.497336	0.529307	0.854352	0.872114	0.007105	0.206039	0.541741	0.777975	0.996448	0.708703	0.245552	0.017762	0.236234	0.48135	0.731794	0.996448	0.351687
0.31291	0.297593	0.389497	0.173246	0.267544	0.256579	0.004376	0.196937	0.520788	0.781182	1	0.008753	0.293217	0.496718	0.704595	0.995624	0.002188	0.218818	0.4814	0.752735	0.997812	0.483589	0	0.516411	0	0.127193	0	0.002188	0.221007	0.4814	0.741794	1	0	0	0	0	0	0.021882	0.269147	0.512035	0.754923	0.986871	0.586433	0.381579	0.006565	0.262582	0.492341	0.733042	0.984683	0.317287
0.29375	0.39375	0.3125	0.238994	0.18239	0.264151	0.06875	0.23125	0.4	0.61875	1	0.0125	0.275	0.525	0.76875	0.99375	0.00625	0.19375	0.53125	0.7375	0.95625	0.38125	0.15	0.46875	0.050314	0.062893	0	0.00625	0.25625	0.5125	0.71875	1	0.01875	0.05	0.2375	0.49375	0.68125	0.08125	0.325	0.55625	0.78125	0.95625	0.5125	0.352201	0.01875	0.325	0.58125	0.81875	0.95	0.3875
0.167816	0.349425	0.482759	0.110599	0.14977	0.359447	0.036782	0.23908	0.404598	0.712644	1	0.004598	0.22069	0.466667	0.758621	0.988506	0.002299	0.25977	0.537931	0.74023	0.997701	0.232184	0.066667	0.701149	0.029954	0.089862	0.002304	0.002299	0.264368	0.365517	0.609195	1	0.073563	0.324138	0.595402	0.972414	0.997701	0.006897	0.241379	0.526437	0.767816	0.956322	0.813793	0.170507	0.009195	0.275862	0.533333	0.767816	0.997701	0.310345
0.372727	0.272727	0.354545	0.165138	0.311927	0.155963	0.018182	0.163636	0.336364	0.7	0.990909	0.136364	0.363636	0.536364	0.745455	1	0.009091	0.209091	0.518182	0.736364	0.972727	0.372727	0.272727	0.354545	0.091743	0.073394	0	0.009091	0.245455	0.5	0.863636	1	0.036364	0.090909	0.190909	0.454545	0.927273	0.254545	0.327273	0.581818	0.672727	0.972727	0.518182	0.40367	0.036364	0.254545	0.518182	0.7	0.936364	0.336364
0.277419	0.406452	0.316129	0.221325	0.172859	0.277868	0.003226	0.254839	0.51129	0.76129	0.998387	0.004839	0.251613	0.506452	0.745161	1	0.001613	0.241935	0.475806	0.748387	0.990323	0.591935	0.291935	0.116129	0.100162	0.038772	0.009693	0.001613	0.267742	0.5	0.785484	1	0.085484	0.272581	0.48871	0.691935	0.991935	0.025806	0.054839	0.548387	0.814516	0.901613	0.616129	0.345719	0.008065	0.253226	0.508065	0.725806	0.991935	0.391935
0.343333	0.32	0.336667	0.173913	0.247492	0.227425	0.01	0.246667	0.513333	0.756667	0.99	0.023333	0.24	0.446667	0.723333	0.996667	0.003333	0.243333	0.51	0.75	1	0.383333	0.223333	0.393333	0.080268	0.060201	0	0.003333	0.166667	0.42	0.676667	1	0.006667	0.103333	0.466667	0.816667	0.986667	0.173333	0.343333	0.626667	0.733333	0.91	0.626667	0.354515	0.006667	0.27	0.463333	0.716667	0.976667	0.33
0.331541	0.304659	0.363799	0.199282	0.260323	0.184919	0.003584	0.252688	0.521505	0.774194	0.998208	0.026882	0.243728	0.473118	0.741935	0.982079	0.001792	0.236559	0.503584	0.729391	1	0.483871	0.154122	0.362007	0.077199	0.070018	0.001795	0.001792	0.232975	0.521505	0.732975	1	0.107527	0.37276	0.740143	0.817204	0.96595	0.005376	0.175627	0.453405	0.688172	0.994624	0.587814	0.355476	0.012545	0.301075	0.53405	0.741935	0.992832	0.310036
0.234043	0.478723	0.287234	0.240642	0.181818	0.240642	0.010638	0.207447	0.468085	0.760638	1	0.015957	0.244681	0.494681	0.728723	0.994681	0.005319	0.228723	0.5	0.718085	0.989362	0.585106	0.340426	0.074468	0.13369	0.048128	0.005348	0.005319	0.154255	0.457447	0.734043	1	0.037234	0.388298	0.585106	0.819149	0.957447	0.244681	0.255319	0.324468	0.569149	0.728723	0.558511	0.385027	0.047872	0.361702	0.537234	0.755319	0.984043	0.484043
0.404762	0.27381	0.321429	0.228916	0.26506	0.180723	0.071429	0.22619	0.440476	0.678571	1	0.02381	0.095238	0.5	0.75	0.97619	0.011905	0.214286	0.511905	0.77381	0.928571	0.27381	0.083333	0.642857	0.036145	0.13253	0.012048	0.011905	0.285714	0.452381	0.821429	1	0.702381	0.702381	0.880952	0.904762	0.928571	0.047619	0.190476	0.440476	0.619048	0.97619	0.416667	0.433735	0.059524	0.27381	0.559524	0.77381	0.964286	0.345238
0.170732	0.463415	0.365854	0.246914	0.098765	0.333333	0.02439	0.243902	0.463415	0.756098	0.95122	0.134146	0.329268	0.536585	0.743902	1	0.012195	0.097561	0.365854	0.670732	0.926829	0.695122	0.073171	0.231707	0.037037	0.037037	0.012346	0.012195	0.353659	0.52439	0.695122	1	0.036585	0.036585	0.060976	0.073171	0.939024	0.097561	0.134146	0.195122	0.780488	0.841463	0.536585	0.469136	0.036585	0.170732	0.341463	0.682927	0.939024	0.5
0.299885	0.394495	0.305619	0.215146	0.200229	0.262192	0.001147	0.272936	0.513188	0.787271	0.999427	0.00344	0.259748	0.513761	0.731078	0.99828	0.000573	0.220757	0.475344	0.729931	1	0.475344	0.328555	0.196101	0.094091	0.041308	0.001147	0.000573	0.267775	0.50172	0.772936	1	0.012615	0.163991	0.328555	0.761468	0.981078	0.001147	0.421445	0.653096	0.733372	0.997133	0.511468	0.398164	0.00172	0.262615	0.490252	0.729358	0.998853	0.40711
0.291624	0.382627	0.32575	0.203934	0.199793	0.248447	0.003102	0.299897	0.57394	0.808687	0.998966	0.002068	0.215098	0.440538	0.699069	1	0.001034	0.256463	0.510858	0.7394	0.995863	0.391934	0.180972	0.427094	0.05383	0.060041	0.00207	0.001034	0.193382	0.386763	0.640124	1	0.005171	0.136505	0.236815	0.379524	0.655636	0.009307	0.45605	0.706308	0.855222	0.996898	0.557394	0.356108	0.004137	0.286453	0.487073	0.743537	0.995863	0.367115
0.353488	0.353488	0.293023	0.247664	0.242991	0.182243	0.013953	0.302326	0.613953	0.823256	1	0.009302	0.209302	0.44186	0.660465	0.95814	0.004651	0.246512	0.446512	0.767442	0.995349	0.437209	0.12093	0.44186	0.065421	0.093458	0	0.004651	0.232558	0.413953	0.711628	1	0.106977	0.162791	0.24186	0.316279	0.404651	0.013953	0.488372	0.646512	0.809302	0.995349	0.437209	0.457944	0.013953	0.232558	0.427907	0.669767	0.995349	0.376744
0.422535	0.29108	0.286385	0.231132	0.235849	0.165094	0.014085	0.258216	0.521127	0.779343	1	0.023474	0.239437	0.42723	0.732394	0.981221	0.004695	0.215962	0.492958	0.671362	0.99061	0.516432	0.187793	0.295775	0.089623	0.070755	0.004717	0.004695	0.178404	0.474178	0.840376	1	0.075117	0.384977	0.450704	0.610329	0.694836	0.018779	0.314554	0.713615	0.788732	0.920188	0.492958	0.349057	0.028169	0.262911	0.464789	0.671362	0.99061	0.314554
0.462366	0.268817	0.268817	0.23913	0.206522	0.173913	0.032258	0.204301	0.537634	0.763441	1	0.021505	0.301075	0.483871	0.591398	0.946237	0.010753	0.129032	0.451613	0.677419	0.913978	0.387097	0.096774	0.516129	0.032609	0.054348	0.01087	0.010753	0.150538	0.526882	0.903226	1	0.075269	0.086022	0.107527	0.473118	0.505376	0.182796	0.301075	0.634409	0.763441	0.892473	0.44086	0.434783	0.075269	0.322581	0.483871	0.655914	0.924731	0.301075
0.23511	0.376176	0.388715	0.179245	0.154088	0.339623	0.040752	0.335423	0.473354	0.749216	0.978056	0.00627	0.269592	0.53605	0.76489	1	0.003135	0.191223	0.454545	0.708464	0.996865	0.23511	0.015674	0.749216	0.012579	0.081761	0	0.003135	0.244514	0.592476	0.833856	1	0.818182	0.818182	0.84953	0.852665	0.858934	0.00627	0.238245	0.460815	0.677116	0.990596	0.755486	0.213836	0.00627	0.23511	0.492163	0.69906	0.987461	0.401254
0.223368	0.532646	0.243986	0.258621	0.113793	0.231034	0.006873	0.285223	0.501718	0.707904	0.982818	0.020619	0.199313	0.491409	0.745704	0.996564	0.003436	0.257732	0.457045	0.762887	1	0.371134	0.209622	0.419244	0.093103	0.072414	0.003448	0.003436	0.261168	0.474227	0.701031	1	0.134021	0.295533	0.75945	0.869416	0.931271	0.006873	0.237113	0.457045	0.652921	0.996564	0.57732	0.372414	0.017182	0.247423	0.47079	0.728522	0.993127	0.5189
0.251366	0.420765	0.327869	0.159341	0.164835	0.291209	0.010929	0.234973	0.448087	0.754098	1	0.027322	0.273224	0.530055	0.715847	0.983607	0.005464	0.218579	0.453552	0.73224	0.918033	0.404372	0.289617	0.306011	0.098901	0.043956	0.021978	0.005464	0.284153	0.469945	0.699454	1	0.120219	0.251366	0.437158	0.590164	0.737705	0.010929	0.081967	0.79235	0.868852	0.945355	0.584699	0.318681	0.016393	0.245902	0.52459	0.79235	0.956284	0.420765
0.278422	0.331787	0.389791	0.169767	0.230233	0.276744	0.00464	0.234339	0.489559	0.761021	0.99536	0.011601	0.292343	0.538283	0.767981	0.979118	0.00232	0.218097	0.468677	0.726218	1	0.438515	0.257541	0.303944	0.095349	0.072093	0.002326	0.00232	0.294664	0.535963	0.777262	1	0.167053	0.310905	0.475638	0.698376	0.990719	0.009281	0.116009	0.387471	0.74478	0.962877	0.556845	0.409302	0.009281	0.257541	0.468677	0.698376	0.990719	0.357309
0.228188	0.371365	0.400447	0.174888	0.14574	0.32287	0.004474	0.165548	0.501119	0.642058	1	0.008949	0.250559	0.480984	0.749441	0.995526	0.002237	0.266219	0.514541	0.774049	0.966443	0.324385	0.013423	0.662192	0.011211	0.069507	0.002242	0.002237	0.10962	0.494407	0.709172	1	0.111857	0.111857	0.337808	0.409396	0.41387	0.008949	0.290828	0.510067	0.762864	0.966443	0.659955	0.197309	0.013423	0.286353	0.514541	0.767338	0.96868	0.391499
0.282297	0.373206	0.344498	0.167866	0.167866	0.318945	0.014354	0.258373	0.507177	0.772727	0.992823	0.004785	0.232057	0.473684	0.69378	1	0.002392	0.260766	0.535885	0.758373	0.997608	0.45933	0.145933	0.394737	0.057554	0.071942	0.004796	0.002392	0.267943	0.4689	0.770335	1	0.052632	0.380383	0.535885	0.72488	0.997608	0.011962	0.198565	0.495215	0.748804	0.971292	0.57177	0.340528	0.011962	0.349282	0.559809	0.760766	0.997608	0.354067
0.271622	0.435135	0.293243	0.216509	0.179973	0.262517	0.005405	0.236486	0.506757	0.766216	1	0.002703	0.235135	0.482432	0.72027	0.995946	0.001351	0.264865	0.485135	0.751351	0.998649	0.409459	0.064865	0.525676	0.040595	0.083897	0	0.001351	0.206757	0.439189	0.682432	1	0.016216	0.160811	0.332432	0.560811	0.963514	0.040541	0.317568	0.587838	0.766216	0.997297	0.628378	0.338295	0.004054	0.27027	0.508108	0.697297	0.998649	0.433784
0.322523	0.304505	0.372973	0.189531	0.250903	0.243682	0.005405	0.181982	0.432432	0.724324	0.971171	0.003604	0.299099	0.493694	0.763964	0.996396	0.001802	0.273874	0.536937	0.769369	1	0.448649	0.072072	0.479279	0.036101	0.072202	0.01083	0.001802	0.275676	0.511712	0.727928	1	0.010811	0.210811	0.315315	0.809009	0.998198	0.05045	0.25045	0.463063	0.758559	0.983784	0.594595	0.306859	0.007207	0.293694	0.542342	0.76036	0.990991	0.30991
0.367021	0.295213	0.337766	0.192	0.274667	0.24	0.005319	0.25266	0.555851	0.803191	1	0.029255	0.25	0.476064	0.702128	0.99734	0.00266	0.220745	0.465426	0.742021	0.994681	0.409574	0.090426	0.5	0.037333	0.08	0	0.00266	0.300532	0.593085	0.704787	1	0.093085	0.18883	0.56383	0.773936	0.81383	0.007979	0.242021	0.412234	0.845745	0.986702	0.553191	0.362667	0.007979	0.231383	0.449468	0.670213	0.981383	0.271277
0.342857	0.334694	0.322449	0.22541	0.229508	0.217213	0.012245	0.326531	0.526531	0.734694	1	0.036735	0.220408	0.428571	0.714286	0.995918	0.004082	0.22449	0.481633	0.763265	0.991837	0.35102	0.126531	0.522449	0.053279	0.086066	0.004098	0.004082	0.159184	0.391837	0.767347	1	0.012245	0.24898	0.35102	0.677551	0.710204	0.053061	0.318367	0.563265	0.791837	0.991837	0.591837	0.385246	0.008163	0.265306	0.461224	0.714286	0.987755	0.342857
0.355388	0.302457	0.342155	0.1875	0.265152	0.210227	0.011342	0.238185	0.529301	0.765595	1	0.005671	0.277883	0.514178	0.754253	0.994329	0.00189	0.234405	0.459357	0.718336	0.996219	0.453686	0.268431	0.277883	0.073864	0.054924	0.00947	0.00189	0.194707	0.478261	0.703214	1	0.045369	0.402647	0.659735	0.867675	0.982987	0.011342	0.234405	0.361059	0.614367	0.952741	0.493384	0.416667	0.007561	0.274102	0.542533	0.744802	0.990548	0.330813
0.281818	0.410909	0.307273	0.23133	0.191257	0.258652	0.009091	0.296364	0.503636	0.794545	0.992727	0.003636	0.243636	0.469091	0.705455	1	0.001818	0.223636	0.510909	0.745455	0.998182	0.689091	0.085455	0.225455	0.045537	0.04918	0.001821	0.001818	0.276364	0.503636	0.781818	1	0.070909	0.14	0.405455	0.656364	0.950909	0.014545	0.163636	0.476364	0.578182	0.996364	0.632727	0.309654	0.014545	0.230909	0.507273	0.729091	0.996364	0.42
0.334545	0.379394	0.286061	0.242718	0.199029	0.237864	0.006061	0.242424	0.495758	0.762424	0.998788	0.002424	0.247273	0.473939	0.716364	0.997576	0.001212	0.260606	0.54303	0.772121	1	0.598788	0.092121	0.309091	0.044903	0.066748	0.003641	0.001212	0.180606	0.421818	0.584242	1	0.055758	0.229091	0.299394	0.355152	0.866667	0.030303	0.653333	0.758788	0.892121	0.996364	0.475152	0.427184	0.007273	0.28	0.574545	0.780606	0.987879	0.402424
0.405229	0.24183	0.352941	0.217105	0.256579	0.203947	0.013072	0.228758	0.496732	0.705882	0.993464	0.019608	0.156863	0.418301	0.653595	0.941176	0.006536	0.294118	0.542484	0.784314	1	0.326797	0.137255	0.535948	0.078947	0.078947	0	0.006536	0.124183	0.346405	0.48366	1	0.045752	0.163399	0.30719	0.431373	0.797386	0.071895	0.379085	0.614379	0.849673	0.986928	0.509804	0.407895	0.039216	0.287582	0.51634	0.784314	0.973856	0.189542
0.321759	0.395833	0.282407	0.25522	0.171694	0.171694	0.020833	0.25	0.476852	0.743056	0.990741	0.00463	0.136574	0.409722	0.678241	0.99537	0.002315	0.37963	0.622685	0.787037	1	0.456019	0.104167	0.439815	0.037123	0.097448	0.00464	0.002315	0.125	0.395833	0.685185	1	0.173611	0.613426	0.643519	0.724537	0.923611	0.083333	0.354167	0.502315	0.773148	0.990741	0.49537	0.394432	0.009259	0.3125	0.560185	0.761574	0.993056	0.421296
0.291322	0.382231	0.326446	0.213251	0.213251	0.250518	0.016529	0.239669	0.448347	0.716942	0.983471	0.004132	0.252066	0.514463	0.745868	0.995868	0.002066	0.241736	0.506198	0.766529	1	0.547521	0.340909	0.11157	0.093168	0.018634	0.006211	0.002066	0.301653	0.522727	0.770661	1	0.051653	0.316116	0.580579	0.799587	0.989669	0.03719	0.107438	0.14876	0.17562	0.735537	0.626033	0.3147	0.039256	0.334711	0.541322	0.752066	0.997934	0.384298
0.402985	0.246269	0.350746	0.218045	0.285714	0.18797	0.014925	0.335821	0.559701	0.723881	1	0.022388	0.261194	0.529851	0.865672	0.992537	0.007463	0.11194	0.328358	0.664179	0.977612	0.402985	0.052239	0.544776	0.030075	0.075188	0	0.007463	0.38806	0.559701	0.865672	1	0.514925	0.514925	0.529851	0.962687	0.977612	0.029851	0.156716	0.30597	0.679104	0.850746	0.522388	0.421053	0.029851	0.171642	0.425373	0.664179	0.977612	0.320896
0.17433	0.415709	0.409962	0.140115	0.128599	0.381958	0.019157	0.237548	0.568966	0.791188	0.994253	0.005747	0.233716	0.463602	0.733716	0.98659	0.001916	0.262452	0.511494	0.749042	1	0.289272	0.045977	0.664751	0.015355	0.069098	0.011516	0.001916	0.157088	0.551724	0.818008	1	0.136015	0.145594	0.683908	0.877395	0.998084	0.01341	0.260536	0.457854	0.678161	0.965517	0.773946	0.214971	0.007663	0.250958	0.492337	0.741379	0.996169	0.371648
0.306452	0.349462	0.344086	0.259459	0.216216	0.243243	0.048387	0.317204	0.553763	0.801075	0.994624	0.010753	0.204301	0.456989	0.688172	1	0.005376	0.247312	0.451613	0.715054	0.989247	0.430108	0.172043	0.397849	0.064865	0.086486	0.010811	0.005376	0.231183	0.489247	0.698925	1	0.010753	0.258065	0.44086	0.521505	0.736559	0.096774	0.225806	0.607527	0.844086	0.962366	0.580645	0.389189	0.016129	0.231183	0.446237	0.666667	0.989247	0.327957
0.305389	0.383234	0.311377	0.228916	0.216867	0.186747	0.011976	0.275449	0.54491	0.778443	0.994012	0.035928	0.287425	0.491018	0.718563	1	0.005988	0.149701	0.437126	0.724551	0.982036	0.526946	0.197605	0.275449	0.168675	0.036145	0.012048	0.005988	0.227545	0.431138	0.796407	1	0.017964	0.437126	0.556886	0.820359	0.97006	0.02994	0.347305	0.568862	0.658683	0.730539	0.556886	0.373494	0.017964	0.197605	0.419162	0.694611	0.982036	0.42515
0.337793	0.307692	0.354515	0.187919	0.234899	0.218121	0.010033	0.237458	0.488294	0.765886	0.989967	0.006689	0.207358	0.494983	0.715719	1	0.003344	0.270903	0.501672	0.735786	0.996656	0.525084	0.183946	0.29097	0.07047	0.07047	0.016779	0.003344	0.16388	0.561873	0.792642	1	0.113712	0.177258	0.307692	0.501672	0.742475	0.234114	0.397993	0.488294	0.789298	0.986622	0.518395	0.33557	0.120401	0.341137	0.525084	0.722408	0.996656	0.254181
0.361204	0.298774	0.340022	0.190848	0.246652	0.214286	0.004459	0.240803	0.527313	0.772575	0.998885	0.00223	0.234114	0.440357	0.666667	1	0.001115	0.268673	0.522854	0.777035	0.996656	0.406912	0.162765	0.430323	0.085938	0.074777	0.00558	0.001115	0.249721	0.412486	0.662207	1	0.056856	0.239688	0.437012	0.615385	0.972129	0.006689	0.221851	0.628763	0.794872	0.995541	0.600892	0.354911	0.005574	0.265329	0.507246	0.726867	0.995541	0.302118
0.358255	0.271028	0.370717	0.203125	0.278125	0.2	0.012461	0.239875	0.489097	0.785047	0.996885	0.05296	0.211838	0.520249	0.713396	1	0.003115	0.252336	0.47352	0.732087	0.993769	0.323988	0.105919	0.570093	0.0375	0.1	0.00625	0.003115	0.193146	0.445483	0.719626	1	0.071651	0.158879	0.451713	0.542056	0.925234	0.015576	0.271028	0.510903	0.772586	0.993769	0.535826	0.44375	0.015576	0.221184	0.507788	0.722741	0.993769	0.258567
0.251058	0.417489	0.331453	0.213277	0.166667	0.283898	0.002821	0.291961	0.559944	0.782793	1	0.005642	0.234133	0.472496	0.727786	0.991537	0.00141	0.222849	0.489422	0.74048	0.99859	0.576869	0.411848	0.011283	0.162429	0.009887	0.001412	0.00141	0.255289	0.502116	0.748942	1	0.023977	0.25952	0.507757	0.760226	0.997179	0.03103	0.03244	0.035261	0.159379	0.372355	0.620592	0.327684	0.012694	0.244006	0.478138	0.716502	0.997179	0.390691
0.28581	0.464525	0.249665	0.241125	0.141326	0.242465	0.001339	0.283802	0.598394	0.822624	1	0.002008	0.240295	0.455823	0.703481	0.999331	0.000669	0.239625	0.503347	0.731593	0.998661	0.710843	0.080321	0.208835	0.048895	0.042197	0.002009	0.000669	0.226908	0.457831	0.711513	1	0.012718	0.186747	0.555556	0.76573	0.986613	0.029451	0.430388	0.657296	0.851406	0.981928	0.439759	0.407234	0.004685	0.240964	0.507363	0.733601	0.991968	0.465863
0.363636	0.343434	0.292929	0.306122	0.214286	0.244898	0.020202	0.20202	0.515152	0.767677	1	0.030303	0.272727	0.484848	0.757576	0.949495	0.010101	0.212121	0.40404	0.656566	0.929293	0.282828	0.121212	0.59596	0.081633	0.081633	0	0.010101	0.080808	0.707071	0.919192	1	0.050505	0.10101	0.131313	0.555556	0.929293	0.161616	0.292929	0.474747	0.686869	0.909091	0.464646	0.530612	0.050505	0.282828	0.494949	0.666667	0.939394	0.343434
0.175904	0.359036	0.46506	0.140097	0.115942	0.342995	0.004819	0.187952	0.440964	0.686747	0.990361	0.007229	0.257831	0.513253	0.725301	0.966265	0.00241	0.248193	0.493976	0.766265	1	0.110843	0.007229	0.881928	0.004831	0.062802	0	0.00241	0.183133	0.479518	0.677108	1	0.992771	0.992771	0.992771	0.995181	0.99759	0.009639	0.248193	0.513253	0.746988	0.983133	0.843373	0.125604	0.019277	0.257831	0.513253	0.746988	0.995181	0.339759
0.269802	0.415842	0.314356	0.238213	0.166253	0.248139	0.00495	0.237624	0.477723	0.712871	1	0.022277	0.25495	0.490099	0.740099	0.997525	0.002475	0.222772	0.509901	0.767327	0.99505	0.391089	0.247525	0.361386	0.08933	0.054591	0	0.002475	0.284653	0.485149	0.663366	1	0.007426	0.341584	0.60396	0.774752	0.950495	0.039604	0.180693	0.415842	0.792079	0.990099	0.633663	0.342432	0.007426	0.25	0.472772	0.732673	0.990099	0.433168
0.215569	0.407186	0.377246	0.141141	0.162162	0.327327	0.011976	0.341317	0.461078	0.739521	1	0.017964	0.200599	0.44012	0.745509	0.994012	0.002994	0.263473	0.541916	0.748503	0.991018	0.344311	0.011976	0.643713	0.006006	0.09009	0	0.002994	0.101796	0.5	0.667665	1	0.637725	0.637725	0.640719	0.643713	0.646707	0.008982	0.299401	0.476048	0.784431	0.991018	0.652695	0.276276	0.008982	0.251497	0.541916	0.727545	0.991018	0.398204
0.165049	0.475728	0.359223	0.166667	0.127451	0.27451	0.067961	0.116505	0.213592	0.669903	0.990291	0.019417	0.291262	0.553398	0.728155	1	0.009709	0.262136	0.475728	0.660194	0.980583	0.563107	0.165049	0.271845	0.088235	0.009804	0.04902	0.009709	0.135922	0.582524	0.825243	1	0.485437	0.572816	0.679612	0.776699	0.873786	0.242718	0.300971	0.368932	0.436893	0.76699	0.543689	0.313725	0.048544	0.398058	0.533981	0.747573	0.912621	0.524272
0.367737	0.327982	0.304281	0.219587	0.212701	0.198164	0.001529	0.33945	0.536697	0.742355	1	0.002294	0.181193	0.444954	0.751529	0.998471	0.000765	0.240061	0.487768	0.750765	0.999235	0.279052	0.066514	0.654434	0.026779	0.063504	0.002295	0.000765	0.090979	0.225535	0.700306	1	0.061927	0.127676	0.185015	0.219419	0.982416	0.00841	0.39526	0.570336	0.756881	0.997706	0.454128	0.425402	0.007645	0.220948	0.470948	0.747706	0.997706	0.34633
0.2	0.41	0.39	0.222222	0.050505	0.30303	0.23	0.39	0.76	0.88	1	0.02	0.3	0.46	0.73	0.99	0.01	0.14	0.41	0.63	0.84	0.5	0.02	0.48	0.020202	0.040404	0	0.01	0.34	0.75	0.87	1	0.41	0.41	0.41	0.41	0.42	0.02	0.13	0.49	0.61	0.73	0.48	0.20202	0.04	0.31	0.5	0.63	0.88	0.39
0.329412	0.335294	0.335294	0.195266	0.213018	0.230769	0.011765	0.217647	0.470588	0.729412	1	0.076471	0.347059	0.535294	0.764706	0.982353	0.005882	0.188235	0.441176	0.694118	0.970588	0.488235	0.217647	0.294118	0.088757	0.088757	0.005917	0.005882	0.335294	0.552941	0.817647	1	0.141176	0.205882	0.694118	0.776471	0.970588	0.017647	0.082353	0.270588	0.452941	0.635294	0.647059	0.366864	0.017647	0.229412	0.517647	0.741176	0.976471	0.335294
0.357453	0.337192	0.305355	0.2	0.217391	0.194203	0.01013	0.305355	0.522431	0.795948	0.998553	0.002894	0.243126	0.523878	0.703329	0.995658	0.001447	0.211288	0.454414	0.704776	1	0.567294	0.144718	0.287988	0.053623	0.068116	0.007246	0.001447	0.303907	0.626628	0.788712	1	0.004342	0.16932	0.429812	0.752533	0.991317	0.033285	0.269175	0.384949	0.586107	0.97974	0.439942	0.353623	0.004342	0.211288	0.421129	0.60492	0.991317	0.345876
0.278689	0.459016	0.262295	0.233333	0.166667	0.25	0.081967	0.245902	0.508197	0.737705	0.983607	0.032787	0.262295	0.442623	0.852459	1	0.016393	0.147541	0.540984	0.688525	0.868852	0.721311	0.180328	0.098361	0.183333	0.05	0.016667	0.016393	0.262295	0.57377	0.770492	1	0.065574	0.081967	0.213115	0.622951	0.852459	0.327869	0.327869	0.360656	0.491803	0.52459	0.311475	0.433333	0.065574	0.147541	0.393443	0.639344	0.868852	0.590164
0.44557	0.272152	0.282278	0.207858	0.286439	0.155894	0.002532	0.310127	0.494937	0.727848	0.994937	0.003797	0.168354	0.324051	0.720253	1	0.001266	0.316456	0.575949	0.81519	0.998734	0.2	0.017722	0.782278	0.011407	0.04436	0.001267	0.001266	0.062025	0.144304	0.212658	1	0.035443	0.167089	0.194937	0.207595	0.977215	0.005063	0.38481	0.583544	0.778481	0.998734	0.268354	0.420786	0.005063	0.258228	0.536709	0.793671	0.997468	0.279747
0.153846	0.43787	0.408284	0.130952	0.107143	0.428571	0.04142	0.153846	0.266272	0.615385	0.887574	0.011834	0.278107	0.47929	0.727811	0.994083	0.005917	0.284024	0.538462	0.763314	1	0.248521	0.017751	0.733728	0.011905	0.083333	0	0.005917	0.171598	0.301775	0.550296	1	0.337278	0.337278	0.337278	0.343195	0.349112	0.011834	0.372781	0.579882	0.781065	0.994083	0.674556	0.261905	0.011834	0.343195	0.526627	0.727811	0.940828	0.39645
0.311239	0.365994	0.322767	0.205202	0.179191	0.274566	0.005764	0.21902	0.498559	0.737752	1	0.008646	0.273775	0.475504	0.778098	0.994236	0.002882	0.239193	0.501441	0.70317	0.991354	0.590778	0.285303	0.123919	0.135838	0.026012	0.00289	0.002882	0.242075	0.481268	0.743516	1	0.126801	0.351585	0.504323	0.70317	0.956772	0.008646	0.034582	0.412104	0.962536	0.994236	0.54755	0.34104	0.011527	0.302594	0.527378	0.78098	0.991354	0.391931
0.28882	0.381988	0.329193	0.211838	0.199377	0.23676	0.006211	0.164596	0.400621	0.729814	0.990683	0.009317	0.236025	0.506211	0.714286	0.993789	0.003106	0.310559	0.562112	0.773292	1	0.428571	0.086957	0.484472	0.034268	0.096573	0.003115	0.003106	0.208075	0.357143	0.590062	1	0.080745	0.118012	0.276398	0.332298	0.726708	0.02795	0.437888	0.63354	0.850932	0.996894	0.5	0.386293	0.018634	0.338509	0.583851	0.748447	0.987578	0.413043
0.242545	0.435388	0.322068	0.219124	0.111554	0.260956	0.003976	0.316103	0.467197	0.628231	0.968191	0.00994	0.248509	0.536779	0.747515	1	0.001988	0.166998	0.518887	0.7833	0.998012	0.502982	0.05169	0.445328	0.027888	0.059761	0.003984	0.001988	0.272366	0.439364	0.596421	1	0.06163	0.204771	0.429423	0.497018	0.71173	0.00994	0.170974	0.727634	0.852883	0.998012	0.620278	0.250996	0.007952	0.202783	0.600398	0.803181	0.998012	0.419483
0.264151	0.417191	0.318658	0.214286	0.184874	0.277311	0.035639	0.245283	0.503145	0.735849	0.962264	0.004193	0.262055	0.509434	0.748428	0.995807	0.002096	0.213836	0.459119	0.75891	1	0.473795	0.161426	0.36478	0.067227	0.058824	0	0.002096	0.331237	0.566038	0.754717	1	0.048218	0.236897	0.459119	0.710692	0.9413	0.004193	0.169811	0.381551	0.675052	0.997904	0.595388	0.361345	0.004193	0.24109	0.484277	0.744235	0.995807	0.431866
0.333333	0.266667	0.4	0.189189	0.189189	0.162162	0.026667	0.333333	0.52	0.746667	0.986667	0.066667	0.346667	0.533333	0.626667	0.96	0.013333	0.173333	0.32	0.693333	1	0.52	0.066667	0.413333	0.027027	0.027027	0.027027	0.013333	0.56	0.693333	0.826667	1	0.306667	0.306667	0.32	0.906667	0.933333	0.04	0.12	0.226667	0.36	0.466667	0.506667	0.378378	0.08	0.186667	0.4	0.64	0.96	0.413333
0.319927	0.400366	0.279707	0.239927	0.181319	0.252747	0.005484	0.210238	0.460695	0.689214	0.989031	0.003656	0.239488	0.493601	0.753199	1	0.001828	0.277879	0.510055	0.773309	0.996344	0.409506	0.246801	0.343693	0.104396	0.071429	0.005495	0.001828	0.213894	0.473492	0.722121	1	0.009141	0.360146	0.563071	0.702011	0.932358	0.031079	0.246801	0.482633	0.751371	0.978062	0.586837	0.435897	0.010969	0.268739	0.521024	0.780622	0.996344	0.420475
0.372093	0.363636	0.264271	0.271186	0.186441	0.197034	0.006342	0.257928	0.46723	0.691332	0.995772	0.019027	0.300211	0.54334	0.77167	1	0.002114	0.160677	0.484144	0.761099	0.991543	0.289641	0.164905	0.545455	0.069915	0.052966	0.006356	0.002114	0.274841	0.604651	0.809725	1	0.095137	0.710359	0.828753	0.890063	0.961945	0.008457	0.230444	0.397463	0.564482	0.991543	0.386892	0.436441	0.012685	0.241015	0.551797	0.803383	0.991543	0.363636
0.153996	0.393762	0.452242	0.099609	0.126953	0.351562	0.005848	0.210526	0.483431	0.789474	0.994152	0.003899	0.31384	0.549708	0.773879	1	0.001949	0.230019	0.438596	0.699805	0.986355	0.245614	0.037037	0.717349	0.011719	0.066406	0.003906	0.001949	0.140351	0.407407	0.651072	1	0.288499	0.294347	0.382066	0.526316	0.536062	0.007797	0.259259	0.57115	0.764133	0.996101	0.818713	0.167969	0.007797	0.255361	0.502924	0.725146	0.988304	0.384016
0.332	0.388	0.28	0.216867	0.204819	0.2249	0.012	0.24	0.504	0.74	1	0.008	0.264	0.496	0.744	0.996	0.004	0.224	0.48	0.732	0.992	0.296	0.028	0.676	0.016064	0.096386	0	0.004	0.276	0.608	0.892	1	0.612	0.612	0.62	0.628	0.98	0.016	0.208	0.452	0.708	0.956	0.524	0.481928	0.016	0.22	0.48	0.7	0.984	0.368
0.300885	0.424779	0.274336	0.267857	0.1875	0.214286	0.017699	0.238938	0.575221	0.831858	1	0.053097	0.292035	0.442478	0.681416	0.938053	0.00885	0.168142	0.451327	0.787611	0.964602	0.504425	0.345133	0.150442	0.142857	0.053571	0	0.00885	0.238938	0.371681	0.761062	1	0.017699	0.212389	0.486726	0.725664	0.911504	0.150442	0.530973	0.566372	0.60177	0.973451	0.548673	0.428571	0.017699	0.221239	0.442478	0.619469	0.982301	0.380531
0.275908	0.40646	0.317631	0.225067	0.171159	0.238544	0.005384	0.223419	0.492598	0.738896	0.998654	0.004038	0.266487	0.48856	0.725437	0.997308	0.001346	0.240915	0.512786	0.783311	1	0.468371	0.020188	0.51144	0.008086	0.080863	0.005391	0.001346	0.297443	0.573351	0.73755	1	0.58681	0.589502	0.729475	0.920592	0.95424	0.002692	0.181696	0.461642	0.757739	0.974428	0.549125	0.366577	0.006729	0.282638	0.51144	0.755047	0.989233	0.411844
0.241758	0.516484	0.241758	0.233333	0.111111	0.311111	0.032967	0.263736	0.527473	0.78022	1	0.010989	0.175824	0.461538	0.714286	0.978022	0.10989	0.307692	0.494505	0.736264	0.989011	0.461538	0	0.538462	0	0.088889	0	0.010989	0.274725	0.395604	0.637363	1	0	0	0	0	0	0.043956	0.164835	0.494505	0.802198	0.967033	0.417582	0.4	0.076923	0.208791	0.428571	0.747253	0.956044	0.56044
0.246602	0.466019	0.287379	0.217899	0.132296	0.297665	0.007767	0.299029	0.51068	0.763107	0.998058	0.003883	0.231068	0.481553	0.737864	1	0.001942	0.246602	0.500971	0.75534	0.992233	0.427184	0.192233	0.380583	0.066148	0.054475	0	0.001942	0.192233	0.51068	0.772816	1	0.023301	0.174757	0.493204	0.64466	0.928155	0.097087	0.287379	0.454369	0.794175	0.994175	0.638835	0.315175	0.01165	0.281553	0.557282	0.757282	0.994175	0.506796
0.402834	0.253036	0.34413	0.200811	0.292089	0.139959	0.004049	0.263158	0.516194	0.767206	1	0.010121	0.222672	0.465587	0.704453	0.991903	0.002024	0.230769	0.504049	0.734818	0.995951	0.433198	0.117409	0.449393	0.056795	0.081136	0.004057	0.002024	0.236842	0.44332	0.684211	1	0.04251	0.107287	0.483806	0.582996	0.939271	0.012146	0.283401	0.621457	0.789474	0.977733	0.481781	0.389452	0.016194	0.255061	0.506073	0.706478	0.993927	0.309717
0.333333	0.382456	0.284211	0.193662	0.183099	0.242958	0.007018	0.252632	0.568421	0.831579	1	0.010526	0.175439	0.431579	0.645614	0.992982	0.003509	0.270175	0.512281	0.694737	0.954386	0.340351	0.080702	0.578947	0.021127	0.112676	0.014085	0.003509	0.126316	0.378947	0.754386	1	0.077193	0.494737	0.515789	0.550877	0.635088	0.038596	0.312281	0.575439	0.764912	0.947368	0.585965	0.239437	0.035088	0.291228	0.494737	0.649123	0.954386	0.392982
0.14534	0.472354	0.382306	0.113924	0.085443	0.386076	0.045814	0.222749	0.503949	0.848341	0.99684	0.00316	0.273302	0.516588	0.745656	0.988942	0.00158	0.218009	0.467615	0.736177	1	0.218009	0.083728	0.698262	0.028481	0.06962	0.015823	0.00158	0.262243	0.578199	0.718799	1	0.085308	0.120063	0.382306	0.696682	0.952607	0.004739	0.259084	0.478673	0.766193	0.99684	0.819905	0.18038	0.009479	0.238547	0.480253	0.736177	0.995261	0.453397
0.361248	0.351396	0.287356	0.271382	0.215461	0.185855	0.004926	0.238095	0.518883	0.768473	0.996716	0.003284	0.220033	0.479475	0.730706	0.998358	0.001642	0.27422	0.515599	0.748768	1	0.415435	0.111658	0.472906	0.041118	0.097039	0.008224	0.001642	0.279146	0.481117	0.704433	1	0.167488	0.29064	0.397373	0.605911	0.958949	0.009852	0.216749	0.561576	0.80624	0.988506	0.510673	0.430921	0.014778	0.285714	0.517241	0.730706	0.995074	0.399015
0.40404	0.323232	0.272727	0.255102	0.255102	0.163265	0.060606	0.212121	0.444444	0.676768	0.959596	0.020202	0.20202	0.545455	0.727273	1	0.010101	0.292929	0.525253	0.848485	0.989899	0.353535	0.060606	0.585859	0.020408	0.122449	0	0.010101	0.272727	0.515152	0.818182	1	0.868687	0.868687	0.888889	0.89899	0.919192	0.070707	0.212121	0.424242	0.626263	0.979798	0.414141	0.44898	0.121212	0.353535	0.585859	0.777778	0.949495	0.373737
0.321053	0.373684	0.305263	0.248021	0.189974	0.234828	0.005263	0.278947	0.513158	0.794737	0.997368	0.013158	0.231579	0.5	0.739474	1	0.002632	0.226316	0.455263	0.710526	0.968421	0.428947	0.297368	0.273684	0.063325	0.026385	0	0.002632	0.176316	0.468421	0.705263	1	0.142105	0.339474	0.434211	0.778947	0.881579	0.005263	0.205263	0.513158	0.689474	0.984211	0.581579	0.258575	0.007895	0.223684	0.431579	0.713158	0.968421	0.394737
0.530303	0.257576	0.212121	0.276923	0.261538	0.153846	0.045455	0.272727	0.530303	0.757576	1	0.030303	0.166667	0.363636	0.651515	0.924242	0.015152	0.151515	0.424242	0.712121	0.939394	0.727273	0.19697	0.075758	0.123077	0.061538	0	0.015152	0.287879	0.515152	0.69697	1	0.212121	0.242424	0.712121	0.818182	0.878788	0.106061	0.106061	0.121212	0.136364	0.484848	0.212121	0.430769	0.090909	0.212121	0.424242	0.712121	0.939394	0.318182
0.28125	0.2875	0.43125	0.169811	0.106918	0.245283	0.025	0.21875	0.63125	0.8875	0.975	0.0125	0.2125	0.48125	0.675	0.98125	0.00625	0.26875	0.45	0.7375	1	0.35625	0.1125	0.53125	0.044025	0.081761	0.006289	0.00625	0.0875	0.54375	0.66875	1	0.38125	0.43125	0.4625	0.5	0.5875	0.1	0.23125	0.375	0.8	0.9875	0.5375	0.238994	0.01875	0.26875	0.4375	0.7125	0.875	0.31875
0.327526	0.400697	0.271777	0.248252	0.171329	0.22028	0.006969	0.268293	0.550523	0.780488	0.993031	0.017422	0.222997	0.452962	0.745645	0.996516	0.003484	0.202091	0.491289	0.710801	1	0.505226	0.038328	0.456446	0.01049	0.094406	0.003497	0.003484	0.1777	0.418118	0.773519	1	0.379791	0.383275	0.393728	0.484321	0.494774	0.121951	0.313589	0.595819	0.738676	0.968641	0.578397	0.328671	0.010453	0.278746	0.501742	0.714286	0.986063	0.432056
0.210526	0.417004	0.37247	0.180527	0.099391	0.326572	0.030364	0.406883	0.58502	0.906883	0.993927	0.004049	0.200405	0.463563	0.714575	0.997976	0.002024	0.232794	0.495951	0.710526	1	0.273279	0	0.726721	0	0.064909	0	0.002024	0.408907	0.510121	0.931174	1	0	0	0	0	0	0.034413	0.224696	0.493927	0.712551	0.921053	0.710526	0.117647	0.026316	0.222672	0.497976	0.706478	0.98583	0.419028
0.313656	0.343172	0.343172	0.204936	0.20758	0.23182	0.000881	0.277533	0.501762	0.75022	0.998678	0.004405	0.24978	0.498678	0.756388	1	0.000441	0.222467	0.491189	0.744934	0.999119	0.393833	0.038326	0.567841	0.016747	0.094315	0.005289	0.000441	0.262996	0.478855	0.736123	1	0.096035	0.284581	0.440529	0.80793	0.972247	0.001322	0.214978	0.537004	0.754626	0.998238	0.543172	0.346408	0.003524	0.221586	0.525991	0.752423	0.999119	0.35815
0.340426	0.322188	0.337386	0.176829	0.210366	0.256098	0.009119	0.316109	0.592705	0.781155	1	0.006079	0.234043	0.483283	0.765957	0.990881	0.00304	0.200608	0.480243	0.708207	0.984802	0.398176	0.197568	0.404255	0.067073	0.085366	0.006098	0.00304	0.31307	0.49848	0.784195	1	0.012158	0.258359	0.480243	0.732523	0.899696	0.039514	0.176292	0.504559	0.68997	0.990881	0.559271	0.414634	0.012158	0.25228	0.492401	0.708207	0.987842	0.328267
0.267218	0.347107	0.385675	0.151934	0.234807	0.254144	0.011019	0.261708	0.4573	0.713499	0.99449	0.00551	0.146006	0.421488	0.69146	1	0.002755	0.316804	0.578512	0.779614	0.997245	0.53719	0.258953	0.203857	0.09116	0.058011	0.002762	0.002755	0.14876	0.476584	0.749311	1	0.082645	0.534435	0.705234	0.834711	0.972452	0.140496	0.206612	0.305785	0.410468	0.933884	0.512397	0.40884	0.033058	0.294766	0.548209	0.754821	0.975207	0.366391
0.240291	0.332524	0.427184	0.160584	0.192214	0.282238	0.009709	0.203883	0.441748	0.796117	1	0.007282	0.264563	0.485437	0.691748	0.995146	0.002427	0.254854	0.548544	0.76699	0.997573	0.220874	0.019417	0.759709	0.009732	0.043796	0	0.002427	0.089806	0.444175	0.75	1	0.463592	0.466019	0.915049	0.919903	0.924757	0.050971	0.281553	0.531553	0.737864	0.995146	0.73301	0.248175	0.024272	0.264563	0.507282	0.747573	0.995146	0.286408
0.226415	0.311321	0.462264	0.152381	0.209524	0.314286	0.018868	0.141509	0.443396	0.556604	0.915094	0.113208	0.264151	0.566038	0.726415	1	0.009434	0.283019	0.5	0.783019	0.990566	0.386792	0.103774	0.509434	0.057143	0.057143	0	0.009434	0.169811	0.490566	0.792453	1	0.839623	0.849057	0.90566	0.933962	0.981132	0.04717	0.273585	0.40566	0.584906	0.716981	0.716981	0.266667	0.028302	0.283019	0.575472	0.754717	0.971698	0.301887
0.328921	0.422607	0.248473	0.258919	0.165138	0.198777	0.003055	0.274949	0.496945	0.776986	0.992872	0.002037	0.286151	0.515275	0.716904	1	0.001018	0.190428	0.442974	0.754582	0.994908	0.60998	0.057026	0.332994	0.022426	0.063201	0.004077	0.001018	0.294297	0.497963	0.656823	1	0.020367	0.03666	0.083503	0.171079	0.984725	0.052953	0.265784	0.695519	0.845214	0.98167	0.433809	0.348624	0.015275	0.213849	0.533605	0.736253	0.994908	0.433809
0.551724	0.149425	0.298851	0.151163	0.418605	0.081395	0.022989	0.287356	0.517241	0.793103	1	0.045977	0.126437	0.229885	0.678161	0.770115	0.011494	0.218391	0.45977	0.747126	0.954023	0.310345	0.011494	0.678161	0	0.139535	0.023256	0.011494	0.114943	0.505747	0.701149	1	0.563218	0.563218	0.563218	0.563218	0.563218	0.057471	0.275862	0.448276	0.781609	0.965517	0.356322	0.534884	0.034483	0.252874	0.45977	0.701149	0.954023	0.229885
0.383838	0.333333	0.282828	0.285714	0.193878	0.204082	0.020202	0.282828	0.555556	0.828283	1	0.030303	0.212121	0.434343	0.666667	0.89899	0.010101	0.161616	0.454545	0.656566	0.959596	0.444444	0.141414	0.414141	0.091837	0.071429	0.010204	0.010101	0.393939	0.686869	0.79798	1	0.040404	0.333333	0.434343	0.464646	0.656566	0.050505	0.141414	0.242424	0.585859	0.969697	0.454545	0.44898	0.030303	0.161616	0.424242	0.585859	0.959596	0.343434
0.215686	0.490196	0.294118	0.2	0.16	0.26	0.039216	0.078431	0.235294	0.509804	0.901961	0.019608	0.294118	0.568627	0.705882	0.980392	0.058824	0.137255	0.470588	0.784314	1	0.745098	0	0.254902	0	0.12	0	0.019608	0.215686	0.411765	0.647059	1	0	0	0	0	0	0.078431	0.490196	0.784314	0.843137	0.921569	0.411765	0.44	0.058824	0.27451	0.470588	0.686275	0.941176	0.705882
0.346154	0.346154	0.307692	0.300971	0.174757	0.242718	0.057692	0.211538	0.5	0.759615	1	0.019231	0.201923	0.413462	0.740385	0.980769	0.009615	0.288462	0.567308	0.711538	0.932692	0.346154	0.288462	0.365385	0.097087	0.07767	0.019417	0.009615	0.346154	0.519231	0.75	1	0.028846	0.557692	0.673077	0.769231	0.942308	0.057692	0.134615	0.259615	0.394231	0.923077	0.490385	0.466019	0.028846	0.25	0.557692	0.711538	0.942308	0.288462
0.22695	0.425532	0.347518	0.192857	0.2	0.264286	0.014184	0.425532	0.624113	0.744681	1	0.028369	0.184397	0.382979	0.765957	0.985816	0.007092	0.269504	0.496454	0.716312	0.921986	0.439716	0.262411	0.297872	0.064286	0.05	0.021429	0.007092	0.106383	0.460993	0.77305	1	0.148936	0.205674	0.602837	0.723404	0.815603	0.141844	0.326241	0.510638	0.666667	0.943262	0.737589	0.228571	0.035461	0.283688	0.489362	0.723404	0.957447	0.453901
0.217054	0.476744	0.306202	0.229572	0.136187	0.33463	0.007752	0.232558	0.511628	0.755814	0.957364	0.011628	0.27907	0.503876	0.736434	1	0.003876	0.205426	0.472868	0.74031	0.996124	0.368217	0.224806	0.406977	0.077821	0.077821	0	0.003876	0.20155	0.465116	0.751938	1	0.023256	0.244186	0.542636	0.77907	0.879845	0.054264	0.286822	0.484496	0.70155	0.992248	0.627907	0.342412	0.01938	0.282946	0.496124	0.75969	0.996124	0.496124
0.305233	0.390988	0.303779	0.225619	0.206696	0.248908	0.023256	0.292151	0.527616	0.760174	1	0.00436	0.235465	0.491279	0.732558	0.99564	0.001453	0.219477	0.475291	0.738372	0.986919	0.607558	0.347384	0.045058	0.138282	0.016012	0.001456	0.001453	0.252907	0.501453	0.74564	1	0.031977	0.223837	0.460756	0.718023	0.969477	0.010174	0.693314	0.864826	0.976744	0.988372	0.524709	0.378457	0.002907	0.232558	0.489826	0.764535	0.986919	0.418605
0.42268	0.268041	0.309278	0.229167	0.28125	0.145833	0.030928	0.216495	0.463918	0.649485	1	0.041237	0.134021	0.43299	0.824742	0.989691	0.010309	0.268041	0.505155	0.742268	0.948454	0.443299	0.061856	0.494845	0.03125	0.072917	0.010417	0.010309	0.103093	0.319588	0.453608	1	0.371134	0.371134	0.463918	0.474227	0.494845	0.14433	0.515464	0.639175	0.762887	0.917526	0.453608	0.354167	0.154639	0.391753	0.628866	0.824742	0.948454	0.278351
0.148438	0.445312	0.40625	0.102362	0.125984	0.338583	0.015625	0.273438	0.414062	0.648438	1	0.03125	0.242188	0.445312	0.710938	0.984375	0.007812	0.179688	0.601562	0.796875	0.992188	0.398438	0	0.601562	0	0.094488	0	0.007812	0.3125	0.414062	0.515625	1	0	0	0	0	0	0.03125	0.171875	0.601562	0.796875	0.953125	0.625	0.23622	0.03125	0.210938	0.546875	0.703125	0.96875	0.414062
0.30618	0.370787	0.323034	0.191549	0.202817	0.233803	0.008427	0.143258	0.418539	0.699438	0.991573	0.005618	0.300562	0.52809	0.744382	1	0.002809	0.266854	0.505618	0.77809	0.997191	0.452247	0.483146	0.064607	0.169014	0.011268	0	0.002809	0.227528	0.519663	0.744382	1	0.016854	0.331461	0.539326	0.775281	0.997191	0.050562	0.061798	0.078652	0.095506	0.129213	0.643258	0.349296	0.019663	0.272472	0.508427	0.744382	0.997191	0.44382
0.100917	0.394495	0.504587	0.092593	0.092593	0.305556	0.055046	0.146789	0.651376	0.706422	0.963303	0.018349	0.110092	0.357798	0.614679	1	0.009174	0.311927	0.550459	0.798165	0.990826	0.275229	0	0.724771	0	0.055556	0	0.009174	0.06422	0.348624	0.642202	1	0	0	0	0	0	0.137615	0.302752	0.53211	0.788991	0.972477	0.614679	0.185185	0.119266	0.275229	0.495413	0.724771	0.981651	0.348624
0.388889	0.209877	0.401235	0.136646	0.248447	0.173913	0.018519	0.209877	0.487654	0.691358	0.993827	0.012346	0.228395	0.382716	0.722222	0.975309	0.006173	0.253086	0.537037	0.740741	1	0.401235	0.265432	0.333333	0.099379	0.062112	0.024845	0.006173	0.203704	0.41358	0.617284	1	0.092593	0.234568	0.481481	0.783951	0.876543	0.018519	0.259259	0.580247	0.895062	0.981481	0.524691	0.372671	0.030864	0.283951	0.574074	0.777778	0.975309	0.240741
0.363057	0.276008	0.360934	0.178723	0.306383	0.206383	0.006369	0.269639	0.484076	0.723992	0.997877	0.002123	0.201699	0.511677	0.749469	0.995754	0.004246	0.250531	0.501062	0.768577	1	0.373673	0.214437	0.41189	0.085106	0.055319	0.008511	0.002123	0.26327	0.566879	0.73673	1	0.055202	0.484076	0.575372	0.730361	0.825902	0.019108	0.212314	0.363057	0.842887	0.96603	0.532909	0.417021	0.008493	0.225053	0.435244	0.687898	0.991507	0.244161
0.25	0.380952	0.369048	0.228916	0.168675	0.228916	0.047619	0.166667	0.559524	0.809524	1	0.107143	0.22619	0.488095	0.690476	0.988095	0.011905	0.238095	0.428571	0.714286	0.940476	0.452381	0.190476	0.357143	0.084337	0.060241	0.036145	0.011905	0.178571	0.404762	0.607143	1	0.047619	0.083333	0.428571	0.535714	0.940476	0.190476	0.261905	0.702381	0.821429	0.928571	0.678571	0.289157	0.02381	0.25	0.428571	0.714286	0.940476	0.380952
0.383784	0.281081	0.335135	0.206522	0.25	0.217391	0.07027	0.264865	0.535135	0.756757	0.994595	0.032432	0.205405	0.491892	0.697297	0.989189	0.005405	0.210811	0.459459	0.745946	1	0.291892	0.124324	0.583784	0.054348	0.097826	0	0.005405	0.221622	0.475676	0.691892	1	0.010811	0.032432	0.459459	0.6	0.875676	0.07027	0.286486	0.518919	0.772973	0.989189	0.535135	0.423913	0.010811	0.178378	0.464865	0.681081	0.983784	0.308108
0.462617	0.261682	0.275701	0.230047	0.2723	0.15493	0.009346	0.280374	0.528037	0.71028	1	0.03271	0.247664	0.523364	0.808411	0.990654	0.004673	0.149533	0.425234	0.728972	0.981308	0.518692	0.042056	0.439252	0.018779	0.122066	0.018779	0.004673	0.196262	0.457944	0.808411	1	0.014019	0.018692	0.752336	0.775701	0.78972	0.023364	0.303738	0.528037	0.663551	0.976636	0.406542	0.441315	0.014019	0.158879	0.471963	0.738318	0.981308	0.285047
0.285383	0.433875	0.280742	0.255814	0.153488	0.239535	0.023202	0.241299	0.457077	0.703016	0.990719	0.00464	0.264501	0.524362	0.765661	1	0.00232	0.225058	0.50348	0.740139	0.99768	0.647332	0.322506	0.030162	0.132558	0.011628	0.002326	0.00232	0.218097	0.4942	0.74942	1	0.018561	0.338747	0.482599	0.777262	0.967517	0.067285	0.071926	0.582367	0.62181	0.63109	0.642691	0.334884	0.013921	0.269142	0.517401	0.74942	0.993039	0.447796
0.335835	0.397749	0.266417	0.274436	0.193609	0.233083	0.003752	0.210131	0.448405	0.72045	1	0.009381	0.273921	0.536585	0.778612	0.994371	0.001876	0.238274	0.478424	0.741088	0.996248	0.185741	0.005629	0.80863	0.005639	0.050752	0.00188	0.001876	0.165103	0.39212	0.934334	1	0.401501	0.401501	0.401501	0.403377	0.921201	0.005629	0.290807	0.517824	0.73546	0.986867	0.474672	0.432331	0.009381	0.227017	0.454034	0.694184	0.996248	0.433396
0.162037	0.351852	0.486111	0.093023	0.130233	0.330233	0.037037	0.314815	0.578704	0.810185	0.99537	0.009259	0.226852	0.458333	0.74537	1	0.00463	0.231481	0.490741	0.722222	0.990741	0.152778	0	0.847222	0	0.055814	0	0.00463	0.402778	0.527778	0.791667	1	0	0	0	0	0	0.009259	0.212963	0.490741	0.740741	0.990741	0.791667	0.186047	0.013889	0.217593	0.481481	0.731481	0.990741	0.356481
0.365733	0.345964	0.288303	0.224422	0.244224	0.183168	0.009885	0.196046	0.365733	0.660626	0.998353	0.003295	0.332784	0.550247	0.76771	1	0.001647	0.255354	0.570016	0.78089	0.995058	0.377265	0.301483	0.321252	0.113861	0.011551	0.00495	0.001647	0.420099	0.604613	0.803954	1	0.397035	0.558484	0.700165	0.846787	0.995058	0.018122	0.135091	0.215815	0.29654	0.522241	0.520593	0.419142	0.008237	0.364086	0.596376	0.792422	0.995058	0.392092
0.192982	0.561404	0.245614	0.196429	0.160714	0.25	0.263158	0.368421	0.596491	0.684211	0.912281	0.035088	0.175439	0.350877	0.719298	1	0.017544	0.315789	0.578947	0.736842	0.964912	0.807018	0.140351	0.052632	0.035714	0.035714	0	0.017544	0.192982	0.45614	0.789474	1	0.596491	0.614035	0.649123	0.684211	0.719298	0.350877	0.350877	0.350877	0.368421	0.385965	0.350877	0.464286	0.070175	0.350877	0.578947	0.807018	0.964912	0.526316
0.354331	0.275591	0.370079	0.174603	0.277778	0.222222	0.023622	0.19685	0.511811	0.755906	1	0.047244	0.307087	0.417323	0.637795	0.976378	0.007874	0.23622	0.519685	0.732283	0.968504	0.440945	0.267717	0.291339	0.079365	0.063492	0	0.007874	0.188976	0.440945	0.76378	1	0.023622	0.110236	0.566929	0.787402	0.858268	0.204724	0.267717	0.511811	0.692913	0.984252	0.566929	0.31746	0.031496	0.267717	0.472441	0.708661	0.968504	0.267717
0.295775	0.211268	0.492958	0.071429	0.271429	0.242857	0.225352	0.492958	0.577465	0.816901	0.985915	0.070423	0.126761	0.267606	0.661972	0.887324	0.014085	0.169014	0.380282	0.71831	1	0.380282	0.169014	0.450704	0.028571	0.114286	0.028571	0.014085	0.239437	0.478873	0.859155	1	0.169014	0.197183	0.309859	0.352113	0.394366	0.084507	0.422535	0.605634	0.71831	0.901408	0.633803	0.342857	0.056338	0.253521	0.422535	0.704225	0.915493	0.239437
0.272031	0.402299	0.32567	0.219231	0.207692	0.234615	0.015326	0.241379	0.448276	0.727969	1	0.007663	0.249042	0.586207	0.762452	0.988506	0.003831	0.233716	0.43295	0.693487	0.996169	0.321839	0.153257	0.524904	0.069231	0.115385	0	0.003831	0.252874	0.436782	0.804598	1	0.076628	0.183908	0.383142	0.735632	0.97318	0.011494	0.241379	0.501916	0.693487	0.992337	0.662835	0.330769	0.011494	0.268199	0.54023	0.750958	0.996169	0.429119
0.311164	0.380048	0.308789	0.22619	0.22381	0.221429	0.014252	0.266033	0.517815	0.769596	1	0.004751	0.232779	0.467933	0.726841	0.997625	0.002375	0.24228	0.503563	0.745843	0.985748	0.4038	0.251781	0.344418	0.1	0.052381	0	0.002375	0.273159	0.491686	0.693587	1	0.007126	0.31829	0.605701	0.805226	0.990499	0.038005	0.168646	0.472684	0.767221	0.961995	0.634204	0.347619	0.007126	0.239905	0.477435	0.719715	0.992874	0.432304
0.322222	0.355556	0.322222	0.247191	0.191011	0.247191	0.055556	0.355556	0.644444	0.811111	1	0.022222	0.211111	0.433333	0.655556	0.988889	0.011111	0.155556	0.466667	0.6	0.955556	0.388889	0.222222	0.388889	0.089888	0.067416	0	0.011111	0.155556	0.455556	0.755556	1	0.044444	0.088889	0.388889	0.677778	0.733333	0.177778	0.255556	0.544444	0.822222	0.922222	0.488889	0.494382	0.066667	0.222222	0.522222	0.711111	0.955556	0.366667
0.343066	0.273723	0.383212	0.153846	0.263736	0.227106	0.010949	0.270073	0.474453	0.781022	0.992701	0.007299	0.20073	0.49635	0.726277	0.937956	0.00365	0.229927	0.50365	0.733577	1	0.430657	0.208029	0.361314	0.091575	0.076923	0.003663	0.00365	0.262774	0.507299	0.788321	1	0.007299	0.226277	0.379562	0.547445	0.992701	0.080292	0.313869	0.576642	0.79562	0.967153	0.583942	0.395604	0.007299	0.226277	0.478102	0.766423	0.99635	0.29562
0.356757	0.340541	0.302703	0.23913	0.206522	0.195652	0.010811	0.340541	0.578378	0.794595	0.994595	0.016216	0.275676	0.475676	0.67027	0.978378	0.005405	0.113514	0.318919	0.762162	1	0.464865	0.048649	0.486486	0.027174	0.081522	0.005435	0.005405	0.351351	0.47027	0.681081	1	0.227027	0.232432	0.243243	0.264865	0.659459	0.021622	0.135135	0.572973	0.794595	0.989189	0.6	0.326087	0.021622	0.178378	0.475676	0.697297	0.983784	0.372973
0.34127	0.444444	0.214286	0.328	0.128	0.168	0.02381	0.246032	0.595238	0.801587	1	0.015873	0.190476	0.365079	0.571429	0.97619	0.007937	0.31746	0.611111	0.738095	0.944444	0.5	0.269841	0.230159	0.096	0.048	0	0.007937	0.150794	0.373016	0.68254	1	0.222222	0.309524	0.468254	0.730159	0.849206	0.079365	0.579365	0.634921	0.912698	0.97619	0.34127	0.384	0.174603	0.277778	0.468254	0.642857	0.97619	0.47619
0.26615	0.462532	0.271318	0.243523	0.147668	0.264249	0.005168	0.248062	0.501292	0.682171	1	0.007752	0.255814	0.498708	0.777778	0.997416	0.002584	0.222222	0.459948	0.736434	0.992248	0.447028	0.160207	0.392765	0.062176	0.072539	0.005181	0.002584	0.26615	0.496124	0.710594	1	0.02584	0.098191	0.348837	0.516796	0.992248	0.124031	0.242894	0.586563	0.754522	0.935401	0.635659	0.326425	0.02584	0.271318	0.465116	0.751938	0.994832	0.503876
[truncated: 438 more rows]
[truncated: 83 more columns]
