# Supplementary material for: Prediction of RNA‐Binding Proteins by Voting Systems
Source: Hindawi journal article supplement (doi:10.1155/2011/506205), 2011-01-01
Supplement: f1 [file 506205.f1.zip › testSet9.csv]

v1	v2	v3	v4	v5	v6	v7	v8	v9	v10	v11	v12	v13	v14	v15	v16	v17	v18	v19	v20	v21	v22	v23	v24	v25	v26	v27	v28	v29	v30	v31	v32	v33	v34	v35	v36	v37	v38	v39	v40	v41	v42	v43	v44	v45	v46	v47	v48	v49	v50
0.364865	0.369369	0.265766	0.264108	0.194131	0.187359	0.018018	0.326577	0.563063	0.822072	1	0.004505	0.191441	0.475225	0.759009	0.995495	0.002252	0.236486	0.441441	0.673423	0.984234	0.457207	0.171171	0.371622	0.054176	0.081264	0.009029	0.002252	0.286036	0.666667	0.880631	1	0.099099	0.297297	0.5	0.677928	0.792793	0.013514	0.198198	0.380631	0.596847	0.954955	0.506757	0.320542	0.013514	0.204955	0.394144	0.646396	0.961712	0.380631
0.349034	0.30314	0.347826	0.200726	0.243047	0.229746	0.002415	0.248792	0.486715	0.7343	1	0.003623	0.258454	0.492754	0.745169	0.992754	0.001208	0.227053	0.503623	0.76087	0.998792	0.477053	0.2343	0.288647	0.099154	0.053204	0.002418	0.001208	0.204106	0.431159	0.733092	1	0.043478	0.205314	0.443237	0.806763	0.998792	0.013285	0.352657	0.561594	0.724638	0.992754	0.561594	0.406288	0.004831	0.256039	0.481884	0.742754	0.998792	0.31401
0.315011	0.422833	0.262156	0.269068	0.152542	0.252119	0.014799	0.160677	0.418605	0.687104	1	0.004228	0.287526	0.54334	0.805497	0.995772	0.002114	0.293869	0.545455	0.729387	0.991543	0.632135	0.164905	0.20296	0.055085	0.038136	0	0.002114	0.188161	0.526427	0.841438	1	0.065539	0.289641	0.458774	0.649049	0.786469	0.084567	0.312896	0.51797	0.682875	0.82241	0.450317	0.322034	0.021142	0.319239	0.556025	0.818182	0.97463	0.427061
0.315789	0.421053	0.263158	0.265152	0.159091	0.272727	0.022556	0.210526	0.466165	0.691729	0.977444	0.015038	0.263158	0.548872	0.736842	1	0.007519	0.165414	0.488722	0.81203	0.969925	0.488722	0.285714	0.225564	0.075758	0.045455	0	0.007519	0.203008	0.421053	0.601504	1	0.030075	0.150376	0.473684	0.646617	0.721805	0.24812	0.774436	0.834586	0.902256	0.962406	0.406015	0.575758	0.030075	0.255639	0.541353	0.789474	0.969925	0.451128
0.331169	0.383117	0.285714	0.30719	0.20915	0.24183	0.038961	0.253247	0.506494	0.75974	1	0.012987	0.266234	0.551948	0.772727	0.987013	0.006494	0.168831	0.402597	0.655844	0.993506	0.454545	0.142857	0.402597	0.091503	0.078431	0.013072	0.006494	0.233766	0.584416	0.772727	1	0.012987	0.038961	0.337662	0.727273	0.909091	0.097403	0.285714	0.435065	0.636364	0.987013	0.474026	0.398693	0.006494	0.207792	0.428571	0.714286	0.993506	0.409091
0.357909	0.348525	0.293566	0.230872	0.201342	0.2	0.004021	0.215818	0.502681	0.730563	0.993298	0.002681	0.257373	0.517426	0.816354	1	0.00134	0.246649	0.47319	0.717158	0.995979	0.549598	0.162198	0.288204	0.071141	0.079195	0.001342	0.00134	0.270777	0.525469	0.758713	1	0.096515	0.321716	0.577748	0.766756	0.997319	0.012064	0.140751	0.394102	0.678284	0.957105	0.475871	0.357047	0.012064	0.254692	0.474531	0.753351	0.997319	0.379357
0.371762	0.274611	0.353627	0.199741	0.300908	0.1738	0.007772	0.279793	0.541451	0.759067	0.998705	0.005181	0.220207	0.463731	0.705959	0.994819	0.001295	0.240933	0.492228	0.756477	1	0.467617	0.234456	0.297927	0.092088	0.058366	0.001297	0.001295	0.207254	0.431347	0.734456	1	0.042746	0.186528	0.436528	0.80829	0.967617	0.006477	0.331606	0.554404	0.713731	0.997409	0.572539	0.399481	0.003886	0.246114	0.487047	0.739637	0.996114	0.283679
0.405694	0.362989	0.231317	0.3	0.142857	0.192857	0.02847	0.217082	0.455516	0.686833	0.989324	0.010676	0.24911	0.494662	0.754448	0.978648	0.003559	0.256228	0.604982	0.800712	1	0.587189	0.124555	0.288256	0.057143	0.078571	0	0.003559	0.30605	0.47331	0.711744	1	0.007117	0.601423	0.697509	0.814947	0.978648	0.042705	0.11032	0.252669	0.654804	0.918149	0.320285	0.328571	0.007117	0.256228	0.654804	0.818505	0.992883	0.359431
0.310484	0.423387	0.266129	0.259109	0.17004	0.222672	0.008065	0.217742	0.475806	0.733871	0.979839	0.016129	0.266129	0.512097	0.762097	1	0.004032	0.258065	0.455645	0.677419	0.983871	0.306452	0.100806	0.592742	0.032389	0.11336	0	0.004032	0.153226	0.375	0.754032	1	0.451613	0.782258	0.830645	0.862903	0.891129	0.052419	0.274194	0.475806	0.641129	0.971774	0.475806	0.331984	0.064516	0.266129	0.459677	0.66129	0.983871	0.439516
0.415842	0.277228	0.306931	0.24	0.23	0.2	0.029703	0.267327	0.544554	0.821782	1	0.059406	0.257426	0.485149	0.623762	0.960396	0.009901	0.118812	0.39604	0.693069	0.90099	0.485149	0.158416	0.356436	0.06	0.1	0	0.009901	0.19802	0.346535	0.633663	1	0.069307	0.09901	0.138614	0.673267	0.712871	0.267327	0.405941	0.762376	0.851485	0.970297	0.386139	0.36	0.059406	0.138614	0.455446	0.673267	0.90099	0.247525
0.345932	0.363717	0.290351	0.242883	0.205961	0.207295	0.003112	0.266785	0.536683	0.738995	1	0.000889	0.241885	0.470431	0.752334	0.998666	0.000445	0.228991	0.489551	0.767452	0.998221	0.501112	0.102268	0.396621	0.047153	0.08452	0.003559	0.000445	0.30458	0.53446	0.746109	1	0.001779	0.251667	0.435305	0.603824	0.986661	0.008004	0.185416	0.468208	0.781236	0.996443	0.501112	0.395018	0.001334	0.242775	0.494442	0.767452	0.998221	0.392174
0.324042	0.412892	0.263066	0.26178	0.148342	0.230366	0.005226	0.290941	0.517422	0.745645	1	0.003484	0.249129	0.583624	0.799652	0.998258	0.001742	0.200348	0.372822	0.585366	0.994774	0.529617	0.148084	0.3223	0.052356	0.073298	0.006981	0.001742	0.336237	0.679443	0.8223	1	0.085366	0.278746	0.409408	0.574913	0.958188	0.019164	0.172474	0.355401	0.527875	0.994774	0.445993	0.279232	0.019164	0.19338	0.372822	0.578397	0.994774	0.439024
0.315305	0.402762	0.281933	0.240783	0.192396	0.248848	0.005754	0.243959	0.475259	0.713464	0.998849	0.002301	0.254315	0.508631	0.758343	1	0.001151	0.227848	0.517837	0.75374	0.997699	0.497123	0.228999	0.273878	0.102535	0.056452	0.003456	0.001151	0.216341	0.471807	0.741082	1	0.039125	0.180667	0.43153	0.812428	0.997699	0.006904	0.331415	0.542002	0.697353	0.991945	0.562716	0.40553	0.003452	0.247411	0.479862	0.733026	0.997699	0.432681
0.349593	0.406504	0.243902	0.226069	0.181263	0.189409	0.006098	0.21748	0.481707	0.697154	0.993902	0.004065	0.270325	0.565041	0.778455	0.995935	0.002033	0.268293	0.455285	0.711382	1	0.603659	0.103659	0.292683	0.03666	0.089613	0.004073	0.002033	0.221545	0.518293	0.776423	1	0.030488	0.26626	0.380081	0.528455	0.955285	0.028455	0.24187	0.449187	0.713415	0.932927	0.392276	0.362525	0.028455	0.24187	0.46748	0.73374	0.997967	0.418699
0.330827	0.463659	0.205514	0.272271	0.150565	0.146801	0.003759	0.238095	0.449875	0.695489	1	0.002506	0.209273	0.482456	0.815789	0.998747	0.001253	0.390977	0.571429	0.724311	0.997494	0.661654	0.114035	0.224311	0.046424	0.048934	0.003764	0.001253	0.180451	0.360902	0.778195	1	0.005013	0.47619	0.617794	0.736842	0.830827	0.017544	0.446115	0.591479	0.726817	0.870927	0.52381	0.33877	0.005013	0.274436	0.536341	0.754386	0.997494	0.469925
0.411765	0.235294	0.352941	0.223881	0.283582	0.104478	0.044118	0.294118	0.588235	0.808824	0.985294	0.029412	0.25	0.411765	0.705882	0.970588	0.014706	0.191176	0.441176	0.617647	1	0.485294	0.161765	0.352941	0.149254	0.059701	0	0.014706	0.147059	0.279412	0.661765	1	0.058824	0.088235	0.308824	0.426471	0.470588	0.514706	0.588235	0.735294	0.823529	0.911765	0.323529	0.447761	0.058824	0.205882	0.426471	0.602941	0.838235	0.338235
0.313225	0.387471	0.299304	0.248837	0.174419	0.239535	0.006961	0.264501	0.461717	0.75174	0.990719	0.00464	0.213457	0.491879	0.7471	0.99768	0.00232	0.2529	0.519722	0.714617	1	0.445476	0.076566	0.477958	0.034884	0.086047	0.006977	0.00232	0.208817	0.37123	0.728538	1	0.076566	0.111369	0.278422	0.336427	0.99536	0.025522	0.396752	0.559165	0.767981	0.944316	0.508121	0.372093	0.020882	0.334107	0.549884	0.726218	0.99536	0.38051
0.442953	0.248322	0.308725	0.202703	0.290541	0.148649	0.020134	0.322148	0.449664	0.724832	1	0.013423	0.187919	0.456376	0.657718	0.993289	0.006711	0.214765	0.536913	0.791946	0.986577	0.322148	0.302013	0.375839	0.121622	0.054054	0.013514	0.006711	0.167785	0.577181	0.765101	1	0.026846	0.261745	0.624161	0.885906	0.986577	0.060403	0.322148	0.416107	0.510067	0.832215	0.402685	0.5	0.026846	0.221477	0.536913	0.758389	0.979866	0.275168
0.295669	0.404896	0.299435	0.273585	0.167925	0.273585	0.003766	0.210923	0.451977	0.72693	0.998117	0.013183	0.26742	0.506591	0.745763	0.996234	0.001883	0.250471	0.512241	0.747646	1	0.399247	0.07533	0.525424	0.030189	0.09434	0.003774	0.001883	0.244821	0.610169	0.79096	1	0.05838	0.681733	0.766478	0.919021	0.964218	0.00565	0.239171	0.436911	0.606403	0.992467	0.595104	0.369811	0.007533	0.274953	0.525424	0.762712	0.990584	0.444444
0.372236	0.347666	0.280098	0.253383	0.212792	0.186962	0.002457	0.244472	0.493857	0.79484	1	0.004914	0.146192	0.416462	0.681818	0.996314	0.001229	0.371007	0.587224	0.771499	0.995086	0.514742	0.293612	0.191646	0.105781	0.04428	0	0.001229	0.157248	0.384521	0.65602	1	0.070025	0.457002	0.604423	0.739558	0.993857	0.004914	0.212531	0.363636	0.925061	0.985258	0.472973	0.378844	0.004914	0.359951	0.54914	0.753071	0.995086	0.388206
0.396694	0.272727	0.330579	0.15	0.258333	0.216667	0.041322	0.256198	0.471074	0.694215	1	0.016529	0.347107	0.495868	0.801653	0.975207	0.008264	0.181818	0.429752	0.710744	0.983471	0.38843	0.272727	0.338843	0.1	0.083333	0.016667	0.008264	0.289256	0.471074	0.818182	1	0.033058	0.297521	0.421488	0.53719	0.975207	0.132231	0.206612	0.578512	0.68595	0.892562	0.446281	0.416667	0.033058	0.214876	0.487603	0.669421	0.966942	0.297521
0.316731	0.372925	0.310345	0.21867	0.212276	0.236573	0.006386	0.293742	0.49553	0.766284	1	0.002554	0.229885	0.517241	0.756066	0.998723	0.001277	0.234994	0.480204	0.727969	0.989783	0.421456	0.254151	0.324393	0.076726	0.058824	0.005115	0.001277	0.190294	0.512133	0.720307	1	0.010217	0.199234	0.598978	0.828863	0.992337	0.034483	0.323116	0.430396	0.733078	0.971903	0.590038	0.355499	0.003831	0.218391	0.485313	0.688378	0.983397	0.403576
0.302041	0.412245	0.285714	0.237705	0.20082	0.221311	0.020408	0.191837	0.42449	0.75102	1	0.008163	0.244898	0.485714	0.714286	0.995918	0.004082	0.289796	0.567347	0.771429	0.991837	0.485714	0.257143	0.257143	0.07377	0.065574	0	0.004082	0.232653	0.379592	0.677551	1	0.089796	0.187755	0.497959	0.673469	0.820408	0.012245	0.461224	0.722449	0.902041	0.987755	0.595918	0.344262	0.016327	0.306122	0.530612	0.722449	0.991837	0.440816
0.385542	0.373494	0.240964	0.333333	0.218182	0.163636	0.012048	0.216867	0.475904	0.728916	1	0.018072	0.295181	0.554217	0.837349	0.993976	0.006024	0.210843	0.439759	0.596386	0.957831	0.36747	0.307229	0.325301	0.09697	0.060606	0	0.006024	0.174699	0.445783	0.801205	1	0.036145	0.271084	0.391566	0.487952	0.927711	0.060241	0.596386	0.698795	0.777108	0.885542	0.379518	0.387879	0.03012	0.23494	0.415663	0.614458	0.957831	0.39759
0.335821	0.380597	0.283582	0.293233	0.18797	0.233083	0.037313	0.246269	0.455224	0.701493	0.985075	0.014925	0.223881	0.514925	0.723881	0.977612	0.007463	0.238806	0.5	0.768657	1	0.373134	0.350746	0.276119	0.172932	0.052632	0.007519	0.007463	0.328358	0.559701	0.723881	1	0.179104	0.380597	0.552239	0.813433	0.992537	0.037313	0.097015	0.246269	0.313433	0.91791	0.477612	0.406015	0.037313	0.246269	0.567164	0.791045	0.992537	0.373134
0.434343	0.313131	0.252525	0.265306	0.244898	0.132653	0.040404	0.191919	0.444444	0.747475	0.979798	0.020202	0.242424	0.555556	0.767677	1	0.010101	0.30303	0.464646	0.686869	0.949495	0.313131	0	0.686869	0	0.061224	0	0.010101	0.070707	0.151515	0.777778	1	0	0	0	0	0	0.181818	0.343434	0.515152	0.717172	0.969697	0.252525	0.346939	0.181818	0.424242	0.616162	0.727273	0.949495	0.333333
0.338983	0.317797	0.34322	0.221277	0.259574	0.246809	0.012712	0.190678	0.394068	0.682203	1	0.008475	0.326271	0.550847	0.792373	0.991525	0.004237	0.241525	0.512712	0.741525	0.995763	0.45339	0.165254	0.381356	0.076596	0.102128	0.008511	0.004237	0.186441	0.525424	0.690678	1	0.275424	0.34322	0.402542	0.648305	0.987288	0.012712	0.211864	0.487288	0.834746	0.966102	0.533898	0.451064	0.021186	0.351695	0.588983	0.75	0.995763	0.326271
0.448598	0.364486	0.186916	0.276995	0.150235	0.14554	0.014019	0.200935	0.457944	0.635514	1	0.009346	0.317757	0.556075	0.803738	0.995327	0.004673	0.242991	0.565421	0.813084	0.985981	0.593458	0.018692	0.38785	0.018779	0.037559	0	0.004673	0.341121	0.691589	0.841121	1	0.373832	0.373832	0.378505	0.873832	0.878505	0.065421	0.154206	0.266355	0.537383	0.668224	0.294393	0.356808	0.079439	0.247664	0.640187	0.836449	0.985981	0.406542
0.326241	0.326241	0.347518	0.185714	0.171429	0.235714	0.028369	0.22695	0.475177	0.680851	0.985816	0.014184	0.326241	0.553191	0.822695	1	0.007092	0.212766	0.446809	0.666667	0.950355	0.304965	0.156028	0.539007	0.064286	0.078571	0.007143	0.007092	0.170213	0.319149	0.617021	1	0.021277	0.049645	0.134752	0.191489	0.262411	0.269504	0.510638	0.673759	0.822695	0.957447	0.567376	0.428571	0.021277	0.234043	0.432624	0.680851	0.943262	0.319149
0.348985	0.376904	0.274112	0.222363	0.212198	0.184244	0.005076	0.21066	0.430203	0.663706	0.994924	0.002538	0.248731	0.590102	0.760152	0.998731	0.001269	0.30203	0.497462	0.800761	1	0.534264	0.025381	0.440355	0.012706	0.071156	0.005083	0.001269	0.190355	0.527919	0.69797	1	0.008883	0.040609	0.130711	0.142132	0.988579	0.034264	0.335025	0.497462	0.854061	0.994924	0.461929	0.376112	0.006345	0.313452	0.545685	0.734772	0.997462	0.42132
0.330882	0.492647	0.176471	0.266667	0.103704	0.185185	0.014706	0.360294	0.507353	0.639706	0.992647	0.022059	0.257353	0.595588	0.838235	1	0.007353	0.183824	0.264706	0.492647	0.985294	0.852941	0.102941	0.044118	0.074074	0.02963	0	0.007353	0.301471	0.522059	0.779412	1	0.191176	0.205882	0.242647	0.272059	0.911765	0.610294	0.610294	0.639706	0.647059	0.661765	0.205882	0.207407	0.058824	0.220588	0.272059	0.463235	0.985294	0.522059
0.376068	0.367521	0.25641	0.301724	0.198276	0.172414	0.025641	0.264957	0.470085	0.675214	0.991453	0.017094	0.25641	0.564103	0.871795	1	0.008547	0.179487	0.452991	0.623932	0.854701	0.521368	0.384615	0.094017	0.094828	0.043103	0.008621	0.008547	0.376068	0.555556	0.854701	1	0.034188	0.17094	0.307692	0.504274	0.692308	0.666667	0.675214	0.74359	0.769231	0.871795	0.376068	0.534483	0.051282	0.188034	0.470085	0.65812	0.897436	0.367521
0.425676	0.310811	0.263514	0.265306	0.190476	0.210884	0.013514	0.202703	0.540541	0.810811	1	0.094595	0.22973	0.47973	0.682432	0.993243	0.006757	0.236486	0.412162	0.689189	0.952703	0.547297	0.22973	0.222973	0.108844	0.040816	0	0.006757	0.175676	0.459459	0.763514	1	0.040541	0.222973	0.425676	0.648649	0.858108	0.297297	0.344595	0.587838	0.912162	0.972973	0.344595	0.367347	0.027027	0.256757	0.439189	0.621622	0.959459	0.304054
0.366133	0.313501	0.320366	0.227064	0.263761	0.188073	0.006865	0.240275	0.498856	0.759725	0.990847	0.009153	0.228833	0.487414	0.734554	1	0.002288	0.267735	0.496568	0.73913	0.995423	0.402746	0.189931	0.407323	0.073394	0.082569	0.004587	0.002288	0.295195	0.517162	0.773455	1	0.100686	0.249428	0.489703	0.743707	0.935927	0.009153	0.196796	0.439359	0.681922	0.981693	0.544622	0.417431	0.009153	0.265446	0.487414	0.702517	0.995423	0.340961
0.281065	0.517751	0.201183	0.275903	0.119597	0.209591	0.004142	0.259172	0.489941	0.708284	0.998817	0.001183	0.230178	0.471006	0.759172	0.999408	0.000592	0.284615	0.577515	0.784615	1	0.878698	0.026627	0.094675	0.022499	0.023683	0.001184	0.000592	0.233136	0.457396	0.736686	1	0.03787	0.100592	0.606509	0.912426	0.935503	0.065089	0.663905	0.701183	0.897041	0.992308	0.491716	0.359976	0.007692	0.195266	0.512426	0.786391	0.997041	0.535503
0.307125	0.371007	0.321867	0.236453	0.197044	0.268473	0.012285	0.262899	0.461916	0.746929	0.997543	0.009828	0.211302	0.520885	0.744472	1	0.002457	0.260442	0.5086	0.734644	0.985258	0.331695	0.088452	0.579853	0.034483	0.1133	0.004926	0.002457	0.19656	0.366093	0.692875	1	0.063882	0.12285	0.206388	0.297297	0.363636	0.019656	0.410319	0.597052	0.786241	0.990172	0.550369	0.438424	0.007371	0.257985	0.454545	0.690418	0.987715	0.385749
0.323353	0.402695	0.273952	0.22039	0.176912	0.235382	0.004491	0.278443	0.476048	0.760479	1	0.010479	0.229042	0.552395	0.751497	0.998503	0.001497	0.238024	0.477545	0.717066	0.994012	0.571856	0.151198	0.276946	0.056972	0.05997	0	0.001497	0.212575	0.525449	0.738024	1	0.068862	0.200599	0.33982	0.447605	0.601796	0.086826	0.363772	0.609281	0.911677	0.992515	0.519461	0.311844	0.005988	0.308383	0.618263	0.763473	0.994012	0.404192
0.295597	0.399371	0.305031	0.189274	0.192429	0.258675	0.015723	0.204403	0.525157	0.779874	1	0.006289	0.261006	0.522013	0.786164	0.996855	0.003145	0.22956	0.462264	0.654088	0.918239	0.45283	0.157233	0.389937	0.053628	0.085174	0.003155	0.003145	0.191824	0.443396	0.713836	1	0.015723	0.27673	0.424528	0.606918	0.688679	0.012579	0.248428	0.522013	0.795597	0.933962	0.506289	0.410095	0.009434	0.245283	0.462264	0.650943	0.927673	0.424528
0.351171	0.392977	0.255853	0.234506	0.20268	0.201005	0.003344	0.22408	0.466555	0.759197	1	0.008361	0.29097	0.5301	0.744147	0.994983	0.001672	0.207358	0.493311	0.729097	0.988294	0.525084	0.22408	0.250836	0.092127	0.045226	0.001675	0.001672	0.282609	0.538462	0.747492	1	0.005017	0.204013	0.468227	0.704013	0.906355	0.025084	0.217391	0.505017	0.780936	0.939799	0.436455	0.38861	0.006689	0.252508	0.510033	0.72408	0.989967	0.391304
0.388889	0.333333	0.277778	0.280374	0.233645	0.224299	0.027778	0.305556	0.555556	0.768519	1	0.018519	0.222222	0.453704	0.657407	0.990741	0.009259	0.138889	0.398148	0.666667	0.962963	0.435185	0.564815	0	0.186916	0	0	0.009259	0.287037	0.518519	0.75	1	0.027778	0.231481	0.407407	0.666667	0.962963	0	0	0	0	0	0.398148	0.35514	0.037037	0.222222	0.537037	0.666667	0.962963	0.37037
0.360775	0.271186	0.368039	0.196602	0.240291	0.201456	0.012107	0.249395	0.532688	0.774818	0.987893	0.004843	0.239709	0.472155	0.699758	0.990315	0.002421	0.251816	0.486683	0.753027	1	0.358354	0.138015	0.503632	0.082524	0.106796	0.004854	0.002421	0.208232	0.539952	0.813559	1	0.038741	0.16707	0.513317	0.917676	0.997579	0.007264	0.25908	0.464891	0.702179	0.951574	0.583535	0.373786	0.007264	0.242131	0.457627	0.677966	0.995157	0.268765
0.403846	0.317308	0.278846	0.262136	0.184466	0.223301	0.086538	0.230769	0.509615	0.759615	0.932692	0.019231	0.240385	0.461538	0.711538	0.990385	0.009615	0.201923	0.471154	0.692308	1	0.413462	0.586538	0	0.174757	0	0	0.009615	0.278846	0.528846	0.778846	1	0.019231	0.201923	0.403846	0.701923	0.990385	0	0	0	0	0	0.384615	0.504854	0.019231	0.211538	0.471154	0.701923	0.971154	0.278846
0.31456	0.46978	0.215659	0.233838	0.169188	0.181568	0.004121	0.274725	0.524725	0.752747	1	0.002747	0.251374	0.471154	0.755495	0.997253	0.001374	0.230769	0.504121	0.718407	0.995879	0.678571	0.023352	0.298077	0.022008	0.055021	0	0.001374	0.299451	0.494505	0.725275	1	0.024725	0.255495	0.537088	0.726648	0.929945	0.063187	0.203297	0.506868	0.854396	0.989011	0.504121	0.404402	0.005495	0.243132	0.559066	0.718407	0.993132	0.48489
0.423913	0.293478	0.282609	0.274725	0.263736	0.142857	0.021739	0.282609	0.5	0.782609	1	0.032609	0.152174	0.402174	0.619565	0.967391	0.01087	0.23913	0.48913	0.728261	0.934783	0.543478	0.119565	0.336957	0.10989	0.087912	0	0.01087	0.206522	0.467391	0.663043	1	0.032609	0.043478	0.304348	0.543478	0.728261	0.076087	0.391304	0.619565	0.891304	0.978261	0.413043	0.43956	0.032609	0.217391	0.48913	0.706522	0.967391	0.25
0.321513	0.420804	0.257683	0.263033	0.14455	0.222749	0.004728	0.385343	0.531915	0.756501	0.973995	0.007092	0.156028	0.371158	0.725768	1	0.002364	0.3026	0.536643	0.768322	0.997636	0.631206	0.101655	0.267139	0.106635	0.07346	0.00237	0.002364	0.200946	0.510638	0.747045	1	0.104019	0.189125	0.375887	0.607565	0.992908	0.047281	0.345154	0.503546	0.758865	0.983452	0.3026	0.50237	0.018913	0.27896	0.524823	0.754137	0.985816	0.439716
0.366372	0.339823	0.293805	0.239362	0.214539	0.214539	0.00354	0.235398	0.490265	0.752212	0.99823	0.00708	0.233628	0.513274	0.778761	0.984071	0.00177	0.258407	0.474336	0.722124	1	0.559292	0.152212	0.288496	0.069149	0.072695	0.001773	0.00177	0.2	0.488496	0.677876	1	0.042478	0.210619	0.428319	0.555752	0.929204	0.017699	0.325664	0.693805	0.780531	0.99292	0.442478	0.397163	0.00708	0.261947	0.467257	0.713274	0.99115	0.362832
0.362805	0.365854	0.271341	0.264122	0.169466	0.20916	0.01372	0.248476	0.477134	0.762195	0.995427	0.003049	0.219512	0.48628	0.722561	0.996951	0.001524	0.27439	0.544207	0.759146	1	0.490854	0.135671	0.373476	0.047328	0.083969	0.010687	0.001524	0.1875	0.387195	0.722561	1	0.030488	0.503049	0.660061	0.86128	0.964939	0.006098	0.291159	0.52439	0.728659	0.993902	0.493902	0.345038	0.006098	0.324695	0.542683	0.759146	0.993902	0.381098
0.295082	0.352459	0.352459	0.194521	0.227397	0.243836	0.016393	0.20765	0.540984	0.756831	0.997268	0.005464	0.26776	0.453552	0.674863	0.991803	0.002732	0.251366	0.513661	0.762295	1	0.404372	0.128415	0.467213	0.063014	0.079452	0.00274	0.002732	0.270492	0.494536	0.655738	1	0.010929	0.068306	0.513661	0.931694	0.986339	0.092896	0.245902	0.483607	0.743169	0.893443	0.63388	0.334247	0.010929	0.26776	0.491803	0.724044	0.991803	0.42623
0.411043	0.251534	0.337423	0.160494	0.265432	0.185185	0.02454	0.276074	0.552147	0.846626	1	0.01227	0.202454	0.460123	0.668712	0.871166	0.006135	0.220859	0.435583	0.717791	0.98773	0.404908	0.294479	0.300613	0.080247	0.04321	0.018519	0.006135	0.122699	0.380368	0.533742	1	0.079755	0.208589	0.398773	0.711656	0.803681	0.159509	0.558282	0.638037	0.90184	0.981595	0.453988	0.296296	0.079755	0.251534	0.429448	0.687117	0.957055	0.233129
0.337017	0.359116	0.303867	0.266667	0.194444	0.2	0.01105	0.259669	0.497238	0.756906	1	0.033149	0.20442	0.469613	0.745856	0.977901	0.005525	0.265193	0.464088	0.690608	0.98895	0.486188	0.425414	0.088398	0.138889	0.05	0.005556	0.005525	0.281768	0.502762	0.762431	1	0.016575	0.18232	0.375691	0.679558	0.895028	0.524862	0.58011	0.61326	0.961326	0.98895	0.508287	0.366667	0.016575	0.20442	0.425414	0.690608	0.98895	0.392265
0.324324	0.416462	0.259214	0.276753	0.153752	0.211562	0.003686	0.214988	0.476658	0.79484	0.997543	0.002457	0.234644	0.525799	0.740786	1	0.001229	0.302211	0.471744	0.712531	0.998771	0.492629	0.12285	0.384521	0.04797	0.092251	0.00369	0.001229	0.137592	0.41769	0.67199	1	0.009828	0.321867	0.471744	0.594595	0.716216	0.040541	0.361179	0.641278	0.821867	0.995086	0.44226	0.305043	0.0086	0.289926	0.488943	0.701474	0.996314	0.444717
0.359223	0.325243	0.315534	0.190244	0.253659	0.209756	0.009709	0.218447	0.456311	0.786408	1	0.014563	0.247573	0.524272	0.76699	0.970874	0.004854	0.271845	0.475728	0.674757	0.956311	0.417476	0.398058	0.184466	0.117073	0.068293	0.009756	0.004854	0.378641	0.650485	0.81068	1	0.009709	0.174757	0.402913	0.572816	0.849515	0.072816	0.208738	0.533981	0.883495	0.956311	0.378641	0.409756	0.014563	0.213592	0.427184	0.621359	0.956311	0.320388
0.39708	0.313869	0.289051	0.255848	0.21345	0.185673	0.007299	0.213139	0.515328	0.785401	1	0.011679	0.233577	0.461314	0.725547	0.99562	0.00146	0.294891	0.512409	0.705109	0.99708	0.513869	0.128467	0.357664	0.05117	0.059942	0.00731	0.00146	0.154745	0.470073	0.865693	1	0.00438	0.359124	0.519708	0.672993	0.90073	0.013139	0.328467	0.559124	0.759124	0.858394	0.486131	0.342105	0.00438	0.280292	0.472993	0.69635	0.99708	0.340146
0.37037	0.34321	0.28642	0.24505	0.200495	0.207921	0.012346	0.259259	0.45679	0.745679	0.995062	0.017284	0.2	0.488889	0.730864	1	0.002469	0.296296	0.535802	0.77037	0.97037	0.592593	0.14321	0.264198	0.061881	0.061881	0.002475	0.002469	0.2	0.365432	0.68642	1	0.004938	0.219753	0.590123	0.859259	0.940741	0.032099	0.412346	0.548148	0.738272	0.851852	0.444444	0.351485	0.004938	0.28642	0.550617	0.740741	0.97037	0.375309
0.292135	0.5	0.207865	0.305085	0.101695	0.186441	0.02809	0.207865	0.426966	0.702247	0.91573	0.011236	0.292135	0.61236	0.831461	1	0.005618	0.11236	0.41573	0.533708	0.97191	0.752809	0.146067	0.101124	0.084746	0.039548	0.016949	0.005618	0.258427	0.55618	0.775281	1	0.314607	0.393258	0.5	0.601124	0.876404	0.039326	0.05618	0.089888	0.11236	0.842697	0.38764	0.293785	0.022472	0.325843	0.494382	0.735955	0.97191	0.516854
0.283978	0.447514	0.268508	0.21792	0.18031	0.220133	0.00884	0.232044	0.436464	0.674033	0.998895	0.003315	0.278453	0.59558	0.777901	0.996685	0.001105	0.227624	0.427624	0.687293	1	0.60663	0.124862	0.268508	0.063053	0.058628	0.003319	0.001105	0.303867	0.59116	0.776796	1	0.029834	0.19337	0.324862	0.470718	0.814365	0.00442	0.21326	0.38895	0.767956	0.956906	0.483978	0.435841	0.00442	0.296133	0.569061	0.775691	0.99116	0.443094
0.368421	0.357895	0.273684	0.265957	0.191489	0.180851	0.042105	0.221053	0.515789	0.768421	1	0.021053	0.210526	0.442105	0.642105	0.989474	0.010526	0.284211	0.589474	0.705263	0.915789	0.315789	0	0.684211	0	0.085106	0	0.010526	0.178947	0.484211	0.915789	1	0	0	0	0	0	0.052632	0.315789	0.536842	0.705263	0.894737	0.389474	0.446809	0.031579	0.284211	0.442105	0.663158	0.915789	0.357895
0.295302	0.422819	0.281879	0.277027	0.168919	0.256757	0.073826	0.422819	0.590604	0.738255	0.986577	0.020134	0.161074	0.409396	0.758389	1	0.006711	0.234899	0.442953	0.697987	0.959732	0.61745	0.288591	0.09396	0.060811	0.02027	0.006757	0.006711	0.214765	0.510067	0.771812	1	0.33557	0.395973	0.503356	0.691275	0.818792	0.040268	0.053691	0.080537	0.825503	0.852349	0.33557	0.472973	0.040268	0.268456	0.456376	0.684564	0.926174	0.422819
0.464103	0.310256	0.225641	0.275064	0.195373	0.151671	0.007692	0.292308	0.551282	0.771795	1	0.005128	0.212821	0.441026	0.725641	0.997436	0.002564	0.238462	0.45641	0.717949	0.946154	0.497436	0.158974	0.34359	0.071979	0.061697	0	0.002564	0.202564	0.446154	0.764103	1	0.007692	0.323077	0.5	0.689744	0.866667	0.048718	0.248718	0.584615	0.728205	0.928205	0.346154	0.359897	0.010256	0.238462	0.464103	0.725641	0.992308	0.317949
0.291762	0.429062	0.279176	0.262314	0.167239	0.239404	0.005721	0.24714	0.528604	0.772311	1	0.002288	0.273455	0.491991	0.749428	0.997712	0.001144	0.226545	0.482838	0.696796	0.998856	0.575515	0.114416	0.310069	0.04811	0.064147	0.004582	0.001144	0.265446	0.52746	0.757437	1	0.004577	0.138444	0.41762	0.59611	0.966819	0.049199	0.215103	0.5	0.726545	0.997712	0.456522	0.318442	0.004577	0.243707	0.5	0.718535	0.998856	0.467963
0.333333	0.373984	0.292683	0.270492	0.172131	0.262295	0.02439	0.219512	0.422764	0.682927	0.99187	0.03252	0.243902	0.552846	0.780488	1	0.00813	0.317073	0.528455	0.764228	0.98374	0.235772	0	0.764228	0	0.081967	0	0.00813	0.056911	0.227642	0.715447	1	0	0	0	0	0	0.065041	0.300813	0.495935	0.764228	0.97561	0.430894	0.459016	0.03252	0.325203	0.528455	0.739837	0.95122	0.349593
0.376344	0.290323	0.333333	0.219424	0.26259	0.172662	0.007168	0.25448	0.494624	0.727599	0.978495	0.02509	0.243728	0.544803	0.777778	1	0.003584	0.240143	0.458781	0.709677	0.97491	0.387097	0.168459	0.444444	0.05036	0.086331	0	0.003584	0.193548	0.455197	0.698925	1	0.16129	0.258065	0.390681	0.591398	0.681004	0.007168	0.225806	0.498208	0.799283	0.960573	0.55914	0.417266	0.017921	0.243728	0.46595	0.666667	0.97491	0.297491
0.35119	0.392857	0.255952	0.250373	0.187779	0.183308	0.005952	0.25744	0.488095	0.738095	0.985119	0.004464	0.241071	0.525298	0.779762	1	0.001488	0.25	0.467262	0.699405	0.998512	0.64881	0.169643	0.181548	0.065574	0.068554	0	0.001488	0.27381	0.544643	0.809524	1	0.052083	0.18006	0.333333	0.540179	0.885417	0.06994	0.306548	0.495536	0.696429	0.973214	0.508929	0.354694	0.00744	0.315476	0.592262	0.808036	0.994048	0.388393
0.446043	0.244604	0.309353	0.246377	0.326087	0.086957	0.021583	0.28777	0.539568	0.76259	1	0.035971	0.23741	0.410072	0.870504	0.964029	0.007194	0.208633	0.460432	0.647482	0.978417	0.388489	0.165468	0.446043	0.057971	0.072464	0	0.007194	0.316547	0.705036	0.899281	1	0.021583	0.05036	0.258993	0.42446	0.467626	0.107914	0.208633	0.57554	0.683453	0.805755	0.359712	0.376812	0.035971	0.179856	0.446043	0.625899	0.877698	0.251799
0.38565	0.318386	0.295964	0.252252	0.247748	0.162162	0.017937	0.224215	0.502242	0.721973	1	0.008969	0.273543	0.430493	0.690583	0.950673	0.004484	0.210762	0.600897	0.798206	0.986547	0.506726	0.125561	0.367713	0.058559	0.058559	0.004505	0.004484	0.295964	0.421525	0.704036	1	0.080717	0.139013	0.609865	0.762332	0.932735	0.017937	0.201794	0.55157	0.793722	0.986547	0.497758	0.378378	0.026906	0.300448	0.533632	0.789238	0.986547	0.331839
0.340426	0.326241	0.333333	0.25	0.207143	0.235714	0.014184	0.269504	0.475177	0.64539	0.957447	0.021277	0.212766	0.524823	0.77305	0.985816	0.007092	0.219858	0.468085	0.794326	1	0.411348	0.319149	0.269504	0.15	0.05	0.007143	0.007092	0.22695	0.546099	0.702128	1	0.198582	0.446809	0.609929	0.822695	0.992908	0.070922	0.12766	0.262411	0.326241	0.921986	0.489362	0.414286	0.035461	0.234043	0.496454	0.787234	0.992908	0.347518
0.45092	0.392638	0.156442	0.378462	0.12	0.098462	0.006135	0.315951	0.527607	0.760736	0.993865	0.009202	0.340491	0.625767	0.834356	1	0.003067	0.113497	0.199387	0.312883	0.745399	0.671779	0.101227	0.226994	0.067692	0.092308	0	0.003067	0.346626	0.558282	0.757669	1	0.052147	0.122699	0.233129	0.325153	0.518405	0.01227	0.171779	0.47546	0.806748	0.98773	0.220859	0.276923	0.009202	0.156442	0.257669	0.441718	0.97546	0.380368
0.364469	0.302198	0.333333	0.218349	0.269725	0.19633	0.005495	0.25641	0.489011	0.760073	0.996337	0.007326	0.203297	0.446886	0.736264	0.998168	0.001832	0.287546	0.529304	0.747253	1	0.342491	0.087912	0.569597	0.034862	0.104587	0.005505	0.001832	0.254579	0.470696	0.727106	1	0.043956	0.197802	0.239927	0.267399	0.377289	0.003663	0.362637	0.564103	0.800366	0.994505	0.569597	0.418349	0.003663	0.260073	0.483516	0.738095	0.998168	0.309524
0.334247	0.386301	0.279452	0.255144	0.183813	0.1893	0.00274	0.228767	0.482192	0.715068	0.99589	0.00411	0.319178	0.636986	0.857534	0.99863	0.00137	0.216438	0.4	0.587671	1	0.49589	0.050685	0.453425	0.032922	0.093278	0.002743	0.00137	0.445205	0.683562	0.871233	1	0.009589	0.646575	0.676712	0.741096	0.889041	0.020548	0.191781	0.334247	0.478082	0.856164	0.491781	0.386831	0.005479	0.224658	0.471233	0.79589	0.99726	0.442466
0.303644	0.4278	0.268556	0.262162	0.167568	0.228378	0.002699	0.218623	0.495277	0.723347	0.993252	0.013495	0.246964	0.483131	0.734143	1	0.00135	0.299595	0.516869	0.77193	0.997301	0.618084	0.132254	0.249663	0.052703	0.05	0.001351	0.00135	0.224022	0.461538	0.695007	1	0.126856	0.357625	0.573549	0.746289	0.881242	0.008097	0.379217	0.541161	0.898785	0.991903	0.475034	0.337838	0.012146	0.358974	0.593792	0.77193	0.997301	0.437247
0.378687	0.355852	0.265461	0.260952	0.217143	0.202857	0.001903	0.221694	0.49001	0.736441	0.996194	0.002854	0.24548	0.47098	0.75452	1	0.000951	0.284491	0.533777	0.758325	0.994291	0.574691	0.137964	0.287345	0.069524	0.082857	0.012381	0.000951	0.2255	0.472883	0.745956	1	0.003806	0.23216	0.440533	0.771646	0.973359	0.031399	0.328259	0.579448	0.699334	0.995243	0.378687	0.447619	0.002854	0.276879	0.510942	0.778306	0.994291	0.392008
0.506369	0.288217	0.205414	0.299841	0.236045	0.118022	0.006369	0.246815	0.549363	0.765924	0.998408	0.003185	0.227707	0.452229	0.66879	0.992038	0.001592	0.261146	0.480892	0.742038	1	0.568471	0.082803	0.348726	0.031898	0.095694	0.00319	0.001592	0.187898	0.47293	0.753185	1	0.052548	0.237261	0.414013	0.468153	0.882166	0.020701	0.363057	0.578025	0.780255	0.984076	0.294586	0.299841	0.007962	0.270701	0.444268	0.652866	0.980892	0.363057
0.416404	0.343849	0.239748	0.262658	0.158228	0.199367	0.028391	0.277603	0.536278	0.760252	1	0.006309	0.201893	0.460568	0.769716	0.993691	0.003155	0.246057	0.44164	0.665615	0.921136	0.637224	0.135647	0.227129	0.056962	0.063291	0	0.003155	0.176656	0.495268	0.77918	1	0.15142	0.242902	0.353312	0.85489	0.940063	0.072555	0.328076	0.523659	0.624606	0.842271	0.274448	0.322785	0.044164	0.249211	0.378549	0.599369	0.917981	0.353312
0.367816	0.275862	0.356322	0.255814	0.290698	0.186047	0.034483	0.252874	0.482759	0.770115	1	0.126437	0.275862	0.574713	0.747126	0.965517	0.011494	0.114943	0.413793	0.643678	0.988506	0.448276	0.321839	0.229885	0.139535	0.046512	0	0.011494	0.229885	0.643678	0.793103	1	0.045977	0.298851	0.597701	0.816092	0.954023	0.137931	0.183908	0.390805	0.448276	0.505747	0.367816	0.418605	0.045977	0.206897	0.45977	0.62069	0.977011	0.321839
0.363529	0.375294	0.261176	0.270907	0.175501	0.204947	0.004706	0.238824	0.417647	0.716471	1	0.002353	0.228235	0.475294	0.732941	0.998824	0.001176	0.331765	0.603529	0.771765	0.996471	0.563529	0.123529	0.312941	0.04947	0.061249	0.002356	0.001176	0.210588	0.351765	0.598824	1	0.009412	0.498824	0.637647	0.758824	0.875294	0.021176	0.485882	0.66	0.884706	0.987059	0.487059	0.374558	0.005882	0.277647	0.556471	0.76	0.996471	0.423529
0.35	0.353846	0.296154	0.27027	0.204633	0.200772	0.011538	0.296154	0.511538	0.788462	1	0.007692	0.153846	0.426923	0.730769	0.980769	0.003846	0.292308	0.492308	0.734615	0.984615	0.5	0.361538	0.138462	0.138996	0.03861	0	0.003846	0.157692	0.534615	0.753846	1	0.115385	0.430769	0.584615	0.811538	0.980769	0.034615	0.165385	0.203846	0.246154	0.469231	0.5	0.393822	0.015385	0.265385	0.523077	0.765385	0.984615	0.361538
0.405882	0.314706	0.279412	0.225331	0.200295	0.181149	0.005882	0.158824	0.438235	0.732353	1	0.002941	0.289706	0.514706	0.760294	0.992647	0.001471	0.364706	0.557353	0.744118	0.998529	0.491176	0.127941	0.380882	0.045655	0.07511	0.007364	0.001471	0.183824	0.377941	0.739706	1	0.126471	0.426471	0.577941	0.714706	0.926471	0.004412	0.348529	0.529412	0.801471	0.997059	0.427941	0.324006	0.007353	0.385294	0.545588	0.738235	0.997059	0.351471
0.446541	0.279088	0.274371	0.223446	0.211644	0.174666	0.003145	0.198899	0.451258	0.779088	1	0.001572	0.258648	0.507862	0.745283	0.997642	0.000786	0.301887	0.538522	0.724843	0.994497	0.40173	0.043239	0.555031	0.01967	0.09048	0.005507	0.000786	0.333333	0.562107	0.830189	1	0.033019	0.524371	0.860849	0.922956	0.995283	0.032233	0.194969	0.464623	0.654874	0.970912	0.397799	0.352478	0.013365	0.290881	0.538522	0.704403	0.996069	0.31761
0.348214	0.366071	0.285714	0.216216	0.18018	0.153153	0.044643	0.285714	0.508929	0.776786	0.991071	0.080357	0.214286	0.428571	0.625	1	0.008929	0.1875	0.535714	0.723214	0.928571	0.446429	0.205357	0.348214	0.09009	0.09009	0	0.008929	0.232143	0.401786	0.625	1	0.017857	0.053571	0.196429	0.571429	0.741071	0.276786	0.455357	0.660714	0.883929	0.973214	0.383929	0.378378	0.026786	0.196429	0.428571	0.696429	0.928571	0.392857
0.357143	0.337662	0.305195	0.313725	0.189542	0.20915	0.051948	0.318182	0.545455	0.818182	1	0.012987	0.175325	0.376623	0.694805	0.974026	0.006494	0.266234	0.454545	0.720779	0.993506	0.448052	0.097403	0.454545	0.039216	0.091503	0	0.006494	0.116883	0.324675	0.681818	1	0.123377	0.266234	0.292208	0.396104	0.422078	0.051948	0.5	0.623377	0.766234	0.915584	0.454545	0.352941	0.032468	0.285714	0.474026	0.720779	0.935065	0.331169
0.371901	0.285124	0.342975	0.224066	0.278008	0.182573	0.012397	0.256198	0.582645	0.77686	1	0.008264	0.210744	0.433884	0.652893	0.983471	0.004132	0.227273	0.454545	0.735537	0.987603	0.446281	0.305785	0.247934	0.13278	0.058091	0	0.004132	0.252066	0.471074	0.698347	1	0.115702	0.260331	0.454545	0.72314	0.913223	0.008264	0.086777	0.590909	0.801653	0.983471	0.528926	0.456432	0.016529	0.301653	0.491736	0.739669	0.987603	0.264463
0.311558	0.386935	0.301508	0.20202	0.207071	0.232323	0.060302	0.211055	0.422111	0.738693	1	0.01005	0.286432	0.582915	0.809045	0.974874	0.005025	0.201005	0.427136	0.663317	0.994975	0.638191	0.100503	0.261307	0.050505	0.080808	0	0.005025	0.286432	0.552764	0.788945	1	0.015075	0.035176	0.105528	0.326633	0.623116	0.120603	0.211055	0.427136	0.733668	0.934673	0.457286	0.414141	0.020101	0.251256	0.542714	0.748744	0.974874	0.396985
0.351682	0.316514	0.331804	0.192956	0.222052	0.217458	0.006116	0.262997	0.547401	0.750765	1	0.003058	0.233945	0.454128	0.698777	0.995413	0.001529	0.247706	0.486239	0.769113	0.990826	0.545872	0.172783	0.281346	0.07657	0.073507	0	0.001529	0.270642	0.550459	0.70948	1	0.067278	0.321101	0.602446	0.810398	0.990826	0.007645	0.17737	0.35474	0.732416	0.934251	0.5	0.352221	0.007645	0.233945	0.457187	0.785933	0.990826	0.334862
0.378995	0.406393	0.214612	0.33945	0.174312	0.155963	0.013699	0.26484	0.493151	0.680365	0.995434	0.009132	0.315068	0.607306	0.799087	0.981735	0.004566	0.146119	0.3379	0.561644	1	0.52968	0.223744	0.246575	0.091743	0.055046	0	0.004566	0.242009	0.511416	0.684932	1	0.091324	0.26484	0.456621	0.69863	0.908676	0.022831	0.219178	0.515982	0.922374	0.986301	0.388128	0.357798	0.031963	0.255708	0.43379	0.716895	0.986301	0.410959
0.282051	0.447552	0.270396	0.240654	0.170561	0.238318	0.016317	0.202797	0.463869	0.701632	0.979021	0.004662	0.321678	0.543124	0.839161	1	0.002331	0.2331	0.431235	0.645688	0.997669	0.636364	0.216783	0.146853	0.070093	0.037383	0	0.002331	0.284382	0.554779	0.839161	1	0.044289	0.212121	0.368298	0.638695	0.769231	0.072261	0.165501	0.375291	0.613054	0.706294	0.536131	0.359813	0.02331	0.300699	0.582751	0.820513	0.997669	0.414918
0.331742	0.272076	0.396181	0.141148	0.26555	0.246411	0.004773	0.243437	0.472554	0.761337	0.99284	0.009547	0.188544	0.455847	0.725537	0.988067	0.002387	0.286396	0.544153	0.747017	1	0.348449	0.088305	0.563246	0.038278	0.105263	0.004785	0.002387	0.188544	0.477327	0.656325	1	0.004773	0.062053	0.138425	0.224344	0.293556	0.019093	0.381862	0.577566	0.799523	0.995227	0.601432	0.37799	0.00716	0.257757	0.48926	0.73031	0.997613	0.26969
0.390244	0.260163	0.349593	0.212245	0.302041	0.17551	0.012195	0.235772	0.48374	0.731707	0.995935	0.00813	0.268293	0.54878	0.821138	1	0.004065	0.239837	0.47561	0.699187	0.979675	0.321138	0.219512	0.45935	0.065306	0.065306	0	0.004065	0.109756	0.443089	0.857724	1	0.04065	0.280488	0.365854	0.772358	0.98374	0.113821	0.231707	0.5	0.682927	0.886179	0.520325	0.44898	0.020325	0.264228	0.556911	0.784553	0.98374	0.272358
0.384712	0.270677	0.344612	0.205772	0.292346	0.200753	0.007519	0.263158	0.501253	0.756892	1	0.005013	0.236842	0.483709	0.734336	0.994987	0.001253	0.240602	0.508772	0.746867	0.997494	0.463659	0.241855	0.294486	0.105395	0.055207	0.002509	0.001253	0.23183	0.483709	0.739348	1	0.038847	0.197995	0.41604	0.795739	0.997494	0.006266	0.319549	0.541353	0.703008	0.992481	0.570175	0.409034	0.003759	0.264411	0.47619	0.741855	0.997494	0.303258
0.33218	0.361592	0.306228	0.225974	0.220779	0.228571	0.00173	0.237024	0.502595	0.725779	0.99827	0.00519	0.262976	0.513841	0.767301	1	0.000865	0.242215	0.474913	0.738754	0.997405	0.487024	0.190311	0.322664	0.082251	0.05974	0.006061	0.000865	0.224913	0.515571	0.764706	1	0.00519	0.172145	0.403114	0.677336	0.965398	0.07526	0.33391	0.555363	0.732699	0.968858	0.544118	0.391342	0.002595	0.24654	0.511246	0.758651	0.995675	0.349481
0.336207	0.327586	0.336207	0.234783	0.234783	0.2	0.017241	0.206897	0.474138	0.681034	0.965517	0.051724	0.275862	0.517241	0.741379	0.982759	0.008621	0.232759	0.465517	0.758621	1	0.224138	0.422414	0.353448	0.052174	0.052174	0.017391	0.008621	0.051724	0.284483	0.577586	1	0.068966	0.655172	0.758621	0.87931	0.991379	0.172414	0.25	0.37069	0.5	0.637931	0.482759	0.486957	0.077586	0.25	0.482759	0.706897	0.982759	0.327586
0.364621	0.3213	0.314079	0.246377	0.257246	0.202899	0.01083	0.288809	0.498195	0.761733	1	0.00722	0.209386	0.527076	0.765343	0.981949	0.00361	0.220217	0.433213	0.696751	0.98556	0.285199	0.267148	0.447653	0.068841	0.061594	0.01087	0.00361	0.129964	0.451264	0.722022	1	0.028881	0.148014	0.314079	0.711191	0.99278	0.039711	0.407942	0.537906	0.750903	0.960289	0.472924	0.478261	0.025271	0.231047	0.527076	0.743682	0.98556	0.303249
0.374652	0.264624	0.360724	0.205021	0.304045	0.188285	0.008357	0.252089	0.506964	0.747911	1	0.005571	0.267409	0.550139	0.770195	0.998607	0.001393	0.225627	0.456825	0.714485	0.997214	0.470752	0.231198	0.29805	0.090656	0.059972	0.001395	0.001393	0.203343	0.435933	0.71727	1	0.044568	0.194986	0.44429	0.834262	0.980501	0.006964	0.345404	0.558496	0.725627	0.994429	0.575209	0.421199	0.004178	0.253482	0.48468	0.743733	0.997214	0.275766
0.349624	0.443609	0.206767	0.25283	0.184906	0.143396	0.026316	0.255639	0.541353	0.819549	0.996241	0.007519	0.327068	0.515038	0.729323	1	0.003759	0.139098	0.300752	0.567669	0.981203	0.684211	0.116541	0.199248	0.045283	0.060377	0	0.003759	0.338346	0.639098	0.827068	1	0.041353	0.139098	0.199248	0.304511	0.394737	0.086466	0.240602	0.481203	0.552632	0.808271	0.496241	0.316981	0.037594	0.263158	0.533835	0.774436	0.981203	0.413534
0.396552	0.327586	0.275862	0.313043	0.269565	0.156522	0.017241	0.275862	0.534483	0.706897	1	0.034483	0.232759	0.62931	0.844828	0.974138	0.008621	0.189655	0.396552	0.525862	0.87931	0.508621	0.241379	0.25	0.104348	0.052174	0	0.008621	0.318966	0.663793	0.87069	1	0.241379	0.465517	0.525862	0.706897	0.810345	0.025862	0.077586	0.189655	0.362069	0.431034	0.336207	0.330435	0.051724	0.163793	0.422414	0.698276	0.853448	0.344828
0.386861	0.357664	0.255474	0.245421	0.212454	0.194139	0.010949	0.222628	0.489051	0.733577	1	0.007299	0.244526	0.514599	0.656934	0.985401	0.00365	0.259124	0.474453	0.79562	0.992701	0.594891	0.259124	0.145985	0.080586	0.058608	0	0.00365	0.310219	0.50365	0.671533	1	0.032847	0.127737	0.30292	0.813869	0.978102	0.171533	0.354015	0.620438	0.886861	0.923358	0.368613	0.336996	0.014599	0.277372	0.474453	0.773723	0.974453	0.379562
0.338028	0.28169	0.380282	0.242857	0.257143	0.242857	0.042254	0.309859	0.605634	0.71831	1	0.028169	0.183099	0.394366	0.704225	0.929577	0.014085	0.197183	0.450704	0.774648	0.985915	0.43662	0.309859	0.253521	0.171429	0.057143	0.028571	0.014085	0.323944	0.591549	0.760563	1	0.056338	0.169014	0.633803	0.84507	0.985915	0.140845	0.211268	0.28169	0.422535	0.492958	0.380282	0.514286	0.070423	0.211268	0.394366	0.746479	0.985915	0.323944
0.392157	0.411765	0.196078	0.336634	0.148515	0.158416	0.019608	0.27451	0.539216	0.833333	1	0.029412	0.205882	0.568627	0.735294	0.980392	0.009804	0.215686	0.333333	0.421569	0.990196	0.745098	0.137255	0.117647	0.059406	0.059406	0	0.009804	0.186275	0.558824	0.745098	1	0.254902	0.27451	0.323529	0.352941	0.441176	0.490196	0.509804	0.833333	0.872549	0.901961	0.22549	0.158416	0.078431	0.254902	0.333333	0.431373	0.892157	0.45098
0.289593	0.420814	0.289593	0.213636	0.159091	0.227273	0.022624	0.20362	0.542986	0.80543	0.995475	0.00905	0.208145	0.470588	0.687783	1	0.004525	0.303167	0.488688	0.764706	0.986425	0.647059	0.180995	0.171946	0.081818	0.054545	0.018182	0.004525	0.221719	0.538462	0.782805	1	0.167421	0.447964	0.651584	0.764706	0.941176	0.022624	0.117647	0.348416	0.402715	0.977376	0.533937	0.263636	0.099548	0.348416	0.547511	0.742081	0.972851	0.434389
0.484375	0.242188	0.273438	0.19685	0.314961	0.11811	0.039062	0.257812	0.492188	0.773438	1	0.015625	0.15625	0.546875	0.898438	0.984375	0.007812	0.148438	0.382812	0.609375	0.796875	0.328125	0.289062	0.382812	0.070866	0.055118	0.007874	0.007812	0.304688	0.484375	0.796875	1	0.03125	0.09375	0.40625	0.515625	0.765625	0.164062	0.25	0.632812	0.828125	0.929688	0.390625	0.346457	0.054688	0.210938	0.4375	0.609375	0.773438	0.242188
0.369942	0.369942	0.260116	0.284884	0.197674	0.238372	0.011561	0.202312	0.445087	0.803468	1	0.023121	0.260116	0.49711	0.716763	0.99422	0.00578	0.254335	0.520231	0.710983	0.965318	0.566474	0.179191	0.254335	0.052326	0.075581	0.005814	0.00578	0.17341	0.34104	0.624277	1	0.242775	0.393064	0.635838	0.682081	0.884393	0.023121	0.491329	0.734104	0.797688	0.965318	0.549133	0.337209	0.023121	0.33526	0.554913	0.710983	0.965318	0.398844
0.4	0.2	0.4	0.202703	0.297297	0.148649	0.026667	0.226667	0.44	0.64	1	0.146667	0.213333	0.613333	0.8	0.933333	0.013333	0.173333	0.466667	0.76	0.986667	0.346667	0.32	0.333333	0.108108	0.054054	0	0.013333	0.24	0.52	0.64	1	0.253333	0.32	0.453333	0.906667	0.986667	0.026667	0.093333	0.173333	0.733333	0.826667	0.44	0.405405	0.053333	0.28	0.56	0.733333	0.946667	0.226667
0.341584	0.386139	0.272277	0.273632	0.199005	0.19403	0.014851	0.267327	0.460396	0.69802	1	0.009901	0.183168	0.415842	0.752475	0.99505	0.00495	0.361386	0.594059	0.821782	0.990099	0.485149	0.173267	0.341584	0.059701	0.069652	0.0199	0.00495	0.153465	0.519802	0.712871	1	0.232673	0.292079	0.628713	0.945545	0.990099	0.039604	0.336634	0.435644	0.727723	0.920792	0.475248	0.41791	0.019802	0.346535	0.509901	0.747525	0.985149	0.371287
0.377939	0.298373	0.323689	0.21558	0.23913	0.20471	0.003617	0.218807	0.504521	0.768535	1	0.009042	0.253165	0.495479	0.748644	0.996383	0.001808	0.25859	0.479204	0.721519	0.998192	0.491863	0.133816	0.374322	0.059783	0.077899	0.001812	0.001808	0.218807	0.396022	0.696203	1	0.018083	0.40868	0.459313	0.576854	0.998192	0.065099	0.251356	0.638336	0.820976	0.981917	0.468354	0.384058	0.019892	0.282098	0.497288	0.725136	0.998192	0.334539
0.360563	0.416901	0.222535	0.330042	0.124118	0.188999	0.004225	0.21831	0.453521	0.721127	0.995775	0.008451	0.226761	0.477465	0.752113	0.997183	0.001408	0.360563	0.602817	0.791549	1	0.587324	0.112676	0.3	0.039492	0.059238	0.005642	0.001408	0.164789	0.311268	0.612676	1	0.040845	0.592958	0.709859	0.895775	0.967606	0.004225	0.43662	0.633803	0.778873	0.997183	0.497183	0.358251	0.007042	0.31831	0.547887	0.75493	0.994366	0.457746
0.355372	0.297521	0.347107	0.204969	0.267081	0.186335	0.018595	0.229339	0.541322	0.791322	0.997934	0.004132	0.204545	0.42562	0.702479	1	0.002066	0.289256	0.506198	0.741736	0.995868	0.450413	0.173554	0.376033	0.066253	0.086957	0.004141	0.002066	0.130165	0.402893	0.719008	1	0.008264	0.419421	0.621901	0.762397	0.927686	0.115702	0.316116	0.52686	0.739669	0.993802	0.528926	0.356108	0.004132	0.318182	0.514463	0.764463	0.995868	0.340909
0.29771	0.419847	0.282443	0.192308	0.161538	0.284615	0.022901	0.251908	0.580153	0.80916	0.992366	0.015267	0.229008	0.427481	0.671756	0.923664	0.007634	0.19084	0.480916	0.748092	1	0.526718	0.244275	0.229008	0.076923	0.046154	0	0.007634	0.221374	0.396947	0.839695	1	0.099237	0.183206	0.282443	0.603053	0.801527	0.40458	0.450382	0.51145	0.687023	0.984733	0.473282	0.4	0.068702	0.198473	0.419847	0.656489	0.977099	0.435115
0.3	0.285714	0.414286	0.188406	0.246377	0.15942	0.042857	0.214286	0.442857	0.714286	0.957143	0.057143	0.328571	0.414286	0.642857	0.942857	0.014286	0.142857	0.557143	0.785714	1	0.4	0.4	0.2	0.188406	0.043478	0.014493	0.014286	0.314286	0.628571	0.828571	1	0.228571	0.371429	0.571429	0.785714	0.914286	0.057143	0.085714	0.142857	0.185714	0.514286	0.571429	0.26087	0.057143	0.371429	0.514286	0.771429	0.928571	0.314286
0.29703	0.391089	0.311881	0.19403	0.233831	0.258706	0.009901	0.242574	0.445545	0.673267	0.985149	0.014851	0.232673	0.584158	0.80198	1	0.00495	0.237624	0.460396	0.69802	0.955446	0.430693	0.39604	0.173267	0.134328	0.054726	0.004975	0.00495	0.272277	0.579208	0.80198	1	0.014851	0.29703	0.450495	0.643564	0.89604	0.079208	0.113861	0.262376	0.777228	0.960396	0.425743	0.447761	0.019802	0.252475	0.455446	0.678218	0.90099	0.410891
0.325279	0.330855	0.343866	0.212291	0.208566	0.264432	0.003717	0.202602	0.44052	0.672862	0.996283	0.007435	0.273234	0.539033	0.769517	0.992565	0.001859	0.258364	0.522305	0.767658	1	0.414498	0.072491	0.513011	0.031657	0.094972	0.001862	0.001859	0.262082	0.574349	0.79368	1	0.042751	0.087361	0.765799	0.86803	0.964684	0.007435	0.234201	0.436803	0.6171	0.992565	0.581784	0.387337	0.009294	0.245353	0.520446	0.767658	0.992565	0.355019
0.328059	0.418776	0.253165	0.262936	0.149947	0.214361	0.003165	0.301688	0.521097	0.78481	1	0.00211	0.194093	0.482068	0.751055	0.996835	0.001055	0.285865	0.474684	0.709916	0.995781	0.530591	0.147679	0.32173	0.057022	0.07603	0.004224	0.001055	0.163502	0.418776	0.724684	1	0.006329	0.277426	0.501055	0.664557	0.986287	0.059072	0.380802	0.580169	0.825949	0.996835	0.456751	0.310454	0.005274	0.318565	0.514768	0.725738	0.995781	0.433544
0.30303	0.400932	0.296037	0.261682	0.186916	0.247664	0.006993	0.268065	0.515152	0.780886	0.993007	0.004662	0.205128	0.459207	0.731935	0.997669	0.002331	0.272727	0.51049	0.724942	1	0.386946	0.090909	0.522145	0.035047	0.114486	0.002336	0.002331	0.228438	0.454545	0.685315	1	0.048951	0.104895	0.181818	0.223776	0.344988	0.013986	0.389277	0.594406	0.804196	0.993007	0.599068	0.411215	0.009324	0.261072	0.477855	0.729604	0.995338	0.435897
0.350649	0.402597	0.246753	0.342105	0.236842	0.171053	0.025974	0.168831	0.467532	0.805195	0.987013	0.077922	0.25974	0.441558	0.662338	1	0.012987	0.181818	0.480519	0.701299	0.935065	0.584416	0.298701	0.116883	0.131579	0.026316	0	0.012987	0.233766	0.519481	0.727273	1	0.142857	0.194805	0.311688	0.493506	0.701299	0.766234	0.779221	0.805195	0.831169	0.87013	0.363636	0.394737	0.064935	0.285714	0.506494	0.61039	0.87013	0.428571
0.423729	0.378531	0.19774	0.335227	0.102273	0.1875	0.028249	0.231638	0.564972	0.841808	1	0.011299	0.214689	0.457627	0.689266	0.99435	0.00565	0.265537	0.435028	0.632768	0.943503	0.463277	0.259887	0.276836	0.073864	0.039773	0.017045	0.00565	0.112994	0.367232	0.553672	1	0.146893	0.265537	0.435028	0.717514	0.80226	0.220339	0.570621	0.644068	0.887006	0.960452	0.446328	0.306818	0.016949	0.271186	0.451977	0.694915	0.943503	0.367232
0.289062	0.351562	0.359375	0.204724	0.251969	0.19685	0.0625	0.28125	0.523438	0.679688	0.960938	0.03125	0.21875	0.414062	0.71875	1	0.007812	0.234375	0.5	0.757812	0.992188	0.476562	0.164062	0.359375	0.047244	0.094488	0	0.007812	0.1875	0.359375	0.710938	1	0.226562	0.257812	0.445312	0.75	0.796875	0.039062	0.492188	0.601562	0.867188	0.960938	0.4375	0.425197	0.023438	0.25	0.46875	0.75	0.96875	0.328125
0.398305	0.29661	0.305085	0.205128	0.273504	0.25641	0.016949	0.161017	0.432203	0.711864	0.991525	0.025424	0.322034	0.542373	0.822034	0.974576	0.008475	0.228814	0.449153	0.745763	1	0.313559	0.228814	0.457627	0.08547	0.068376	0	0.008475	0.262712	0.508475	0.754237	1	0.271186	0.313559	0.398305	0.491525	0.847458	0.025424	0.127119	0.59322	0.70339	0.957627	0.457627	0.324786	0.042373	0.29661	0.483051	0.779661	0.983051	0.305085
0.275	0.454167	0.270833	0.217573	0.179916	0.217573	0.0125	0.158333	0.4125	0.675	1	0.008333	0.2875	0.566667	0.854167	0.991667	0.004167	0.2625	0.441667	0.6125	0.816667	0.441667	0.325	0.233333	0.117155	0.066946	0.008368	0.004167	0.304167	0.6125	0.779167	1	0.0125	0.183333	0.379167	0.5375	0.754167	0.066667	0.208333	0.658333	0.866667	0.925	0.4	0.426778	0.016667	0.241667	0.425	0.625	0.966667	0.454167
0.379032	0.419355	0.201613	0.341463	0.170732	0.130081	0.032258	0.217742	0.395161	0.653226	1	0.016129	0.258065	0.556452	0.830645	0.983871	0.008065	0.16129	0.483871	0.66129	0.951613	0.572581	0.048387	0.379032	0.056911	0.04065	0.00813	0.008065	0.258065	0.669355	0.814516	1	0.66129	0.66129	0.879032	0.887097	0.951613	0.080645	0.16129	0.33871	0.435484	0.653226	0.346774	0.406504	0.104839	0.193548	0.459677	0.677419	0.951613	0.435484
0.408	0.344	0.248	0.290323	0.241935	0.177419	0.016	0.216	0.44	0.728	0.984	0.048	0.296	0.552	0.76	0.992	0.008	0.136	0.368	0.616	1	0.464	0.536	0	0.193548	0	0	0.008	0.272	0.528	0.76	1	0.04	0.224	0.488	0.712	0.992	0	0	0	0	0	0.416	0.322581	0.048	0.248	0.496	0.616	0.944	0.336
0.380645	0.322581	0.296774	0.230603	0.256466	0.18319	0.008602	0.283871	0.522581	0.772043	0.963441	0.015054	0.24086	0.47957	0.733333	0.997849	0.002151	0.217204	0.494624	0.737634	1	0.354839	0.083871	0.56129	0.032328	0.092672	0.002155	0.002151	0.286022	0.537634	0.789247	1	0.210753	0.27957	0.395699	0.516129	0.597849	0.004301	0.178495	0.486022	0.731183	0.954839	0.541935	0.405172	0.006452	0.260215	0.48172	0.703226	0.995699	0.412903
0.313316	0.441253	0.245431	0.244444	0.154248	0.215686	0.003916	0.201044	0.385117	0.651436	1	0.002611	0.308094	0.552219	0.805483	0.997389	0.001305	0.259791	0.549608	0.711488	0.989556	0.672324	0.122715	0.204961	0.060131	0.049673	0.007843	0.001305	0.234987	0.47389	0.780679	1	0.020888	0.437337	0.579634	0.677546	0.964752	0.018277	0.244125	0.422977	0.685379	0.920366	0.458225	0.360784	0.007833	0.362924	0.584856	0.800261	0.993473	0.432115
0.37395	0.380952	0.245098	0.304348	0.165498	0.178121	0.007003	0.271709	0.528011	0.80112	1	0.002801	0.256303	0.522409	0.780112	0.997199	0.001401	0.208683	0.418768	0.64986	0.957983	0.509804	0.121849	0.368347	0.040673	0.057504	0.007013	0.001401	0.292717	0.670868	0.872549	1	0.060224	0.264706	0.414566	0.539216	0.642857	0.004202	0.190476	0.406162	0.64986	0.757703	0.487395	0.350631	0.004202	0.229692	0.441176	0.654062	0.990196	0.389356
0.293646	0.336829	0.369525	0.195062	0.214815	0.23642	0.001234	0.247378	0.511413	0.763726	0.999383	0.003701	0.188155	0.447872	0.711289	1	0.000617	0.291795	0.534238	0.758174	0.995682	0.328192	0.05182	0.619988	0.02037	0.108025	0.004321	0.000617	0.243677	0.509562	0.828501	1	0.122764	0.249229	0.715608	0.920419	0.978408	0.001234	0.254164	0.480568	0.712523	0.996299	0.579889	0.37037	0.001851	0.257249	0.487353	0.735349	0.995065	0.359655
0.315789	0.361842	0.322368	0.271523	0.205298	0.18543	0.026316	0.230263	0.493421	0.730263	0.993421	0.013158	0.263158	0.519737	0.822368	1	0.006579	0.236842	0.453947	0.684211	0.927632	0.361842	0.177632	0.460526	0.07947	0.07947	0	0.006579	0.184211	0.348684	0.875	1	0.052632	0.085526	0.164474	0.230263	0.940789	0.269737	0.453947	0.598684	0.75	0.868421	0.532895	0.437086	0.052632	0.269737	0.447368	0.690789	0.934211	0.368421
0.391304	0.452899	0.155797	0.345455	0.138182	0.112727	0.014493	0.300725	0.532609	0.771739	1	0.025362	0.228261	0.518116	0.710145	0.996377	0.003623	0.130435	0.333333	0.706522	0.923913	0.717391	0.050725	0.231884	0.021818	0.058182	0	0.003623	0.246377	0.48913	0.666667	1	0.032609	0.039855	0.108696	0.315217	0.32971	0.130435	0.365942	0.728261	0.844203	0.92029	0.23913	0.370909	0.01087	0.221014	0.525362	0.778986	0.985507	0.463768
0.35206	0.303371	0.344569	0.229323	0.244361	0.233083	0.026217	0.284644	0.546816	0.790262	0.996255	0.007491	0.250936	0.475655	0.764045	1	0.003745	0.217228	0.449438	0.662921	0.973783	0.445693	0.333333	0.220974	0.086466	0.06391	0.018797	0.003745	0.307116	0.565543	0.842697	1	0.011236	0.247191	0.393258	0.546816	0.962547	0.037453	0.093633	0.629213	0.764045	0.917603	0.490637	0.421053	0.014981	0.269663	0.47191	0.662921	0.985019	0.325843
0.330645	0.4	0.269355	0.253635	0.15832	0.208401	0.022581	0.3	0.530645	0.820968	1	0.003226	0.204839	0.45	0.695161	0.985484	0.001613	0.282258	0.529032	0.724194	0.974194	0.540323	0.140323	0.319355	0.050081	0.072698	0.004847	0.001613	0.143548	0.408065	0.759677	1	0.174194	0.403226	0.614516	0.727419	0.848387	0.006452	0.340323	0.551613	0.746774	0.977419	0.503226	0.310178	0.006452	0.287097	0.491935	0.696774	0.974194	0.440323
0.34058	0.362319	0.297101	0.243194	0.210526	0.219601	0.005435	0.255435	0.536232	0.797101	0.996377	0.003623	0.28442	0.528986	0.778986	1	0.001812	0.184783	0.427536	0.630435	0.992754	0.467391	0.063406	0.469203	0.019964	0.07804	0.005445	0.001812	0.26087	0.641304	0.824275	1	0.056159	0.068841	0.186594	0.373188	0.615942	0.005435	0.29529	0.461957	0.652174	0.994565	0.496377	0.315789	0.007246	0.217391	0.45471	0.625	0.992754	0.418478
0.387387	0.288288	0.324324	0.245455	0.263636	0.227273	0.027027	0.189189	0.405405	0.720721	0.981982	0.036036	0.198198	0.504505	0.765766	0.990991	0.009009	0.351351	0.495495	0.711712	1	0.504505	0.243243	0.252252	0.090909	0.054545	0	0.009009	0.18018	0.351351	0.81982	1	0.099099	0.279279	0.558559	0.675676	0.936937	0.045045	0.396396	0.459459	0.738739	0.801802	0.405405	0.436364	0.045045	0.306306	0.531532	0.684685	0.972973	0.288288
0.373585	0.403774	0.222642	0.234139	0.164653	0.173716	0.005283	0.209811	0.438491	0.69283	0.999245	0.001509	0.273208	0.544151	0.759245	0.996226	0.000755	0.283774	0.529057	0.802264	1	0.671698	0.068679	0.259623	0.029456	0.062689	0.005287	0.000755	0.237736	0.533585	0.77283	1	0.002264	0.050566	0.480755	0.687547	0.903396	0.009811	0.306415	0.426415	0.676981	0.96	0.477736	0.291541	0.003774	0.32	0.632453	0.86717	0.996226	0.446038
0.341463	0.341463	0.317073	0.273469	0.195918	0.208163	0.00813	0.215447	0.443089	0.756098	1	0.01626	0.308943	0.528455	0.760163	0.98374	0.004065	0.235772	0.49187	0.719512	0.995935	0.390244	0.012195	0.597561	0.004082	0.142857	0.012245	0.004065	0.378049	0.544715	0.739837	1	0.414634	0.414634	0.414634	0.418699	0.49187	0.012195	0.178862	0.434959	0.752033	0.99187	0.54878	0.408163	0.01626	0.252033	0.50813	0.703252	0.98374	0.353659
0.285036	0.534442	0.180523	0.283333	0.116667	0.154762	0.004751	0.19715	0.384798	0.63658	0.995249	0.016627	0.406176	0.631829	0.814727	0.997625	0.002375	0.125891	0.299287	0.501188	1	0.726841	0.149644	0.123515	0.059524	0.035714	0.002381	0.002375	0.437055	0.619952	0.807601	1	0.019002	0.114014	0.230404	0.330166	0.928741	0.009501	0.066508	0.263658	0.35867	0.895487	0.638955	0.242857	0.016627	0.36342	0.591449	0.767221	0.988124	0.505938
0.290909	0.384848	0.324242	0.203647	0.221884	0.221884	0.009091	0.242424	0.445455	0.736364	0.981818	0.012121	0.272727	0.478788	0.748485	0.99697	0.00303	0.221212	0.551515	0.760606	1	0.369697	0.160606	0.469697	0.045593	0.100304	0.00304	0.00303	0.215152	0.50303	0.745455	1	0.154545	0.284848	0.521212	0.70303	0.784848	0.015152	0.245455	0.487879	0.833333	0.990909	0.518182	0.401216	0.021212	0.236364	0.527273	0.69697	0.984848	0.381818
0.311475	0.459016	0.229508	0.249315	0.150685	0.208219	0.005464	0.251366	0.461749	0.79235	0.994536	0.008197	0.259563	0.581967	0.748634	1	0.002732	0.221311	0.418033	0.631148	0.95082	0.860656	0.035519	0.103825	0.016438	0.038356	0.005479	0.002732	0.275956	0.540984	0.756831	1	0.016393	0.021858	0.297814	0.39071	0.885246	0.106557	0.139344	0.191257	0.461749	0.986339	0.363388	0.361644	0.008197	0.18306	0.47541	0.713115	0.980874	0.486339
0.390805	0.356322	0.252874	0.267442	0.174419	0.209302	0.057471	0.183908	0.413793	0.563218	0.965517	0.022989	0.264368	0.574713	0.781609	1	0.011494	0.275862	0.586207	0.758621	0.988506	0.149425	0.011494	0.83908	0.023256	0.069767	0	0.011494	0.034483	0.494253	0.758621	1	0.770115	0.770115	0.770115	0.770115	0.770115	0.045977	0.241379	0.448276	0.689655	0.988506	0.287356	0.418605	0.08046	0.356322	0.574713	0.712644	0.954023	0.321839
0.363636	0.46281	0.173554	0.4	0.141667	0.1	0.016529	0.280992	0.570248	0.760331	1	0.033058	0.330579	0.578512	0.818182	0.991736	0.008264	0.132231	0.256198	0.347107	0.702479	0.61157	0.173554	0.214876	0.083333	0.066667	0	0.008264	0.231405	0.553719	0.842975	1	0.090909	0.123967	0.198347	0.280992	0.413223	0.454545	0.495868	0.694215	0.743802	0.809917	0.247934	0.266667	0.041322	0.181818	0.305785	0.371901	0.77686	0.487603
0.438326	0.356828	0.204846	0.324503	0.183223	0.134658	0.006608	0.185022	0.453744	0.720264	0.997797	0.004405	0.251101	0.45815	0.737885	0.993392	0.002203	0.414097	0.610132	0.810573	1	0.464758	0.218062	0.317181	0.081678	0.081678	0.002208	0.002203	0.207048	0.440529	0.740088	1	0.048458	0.286344	0.513216	0.73348	0.991189	0.008811	0.253304	0.537445	0.757709	0.993392	0.433921	0.322296	0.008811	0.244493	0.484581	0.73348	0.993392	0.400881
0.385802	0.322531	0.291667	0.230294	0.224111	0.157651	0.003086	0.180556	0.395062	0.692901	0.99537	0.007716	0.287037	0.555556	0.790123	1	0.001543	0.337963	0.552469	0.774691	0.996914	0.342593	0.037037	0.62037	0.018547	0.092736	0.006182	0.001543	0.097222	0.291667	0.728395	1	0.009259	0.061728	0.438272	0.455247	0.859568	0.100309	0.353395	0.554012	0.753086	0.996914	0.472222	0.36476	0.013889	0.373457	0.569444	0.782407	0.996914	0.330247
0.362245	0.306122	0.331633	0.202046	0.263427	0.209719	0.010204	0.247449	0.528061	0.752551	0.994898	0.005102	0.229592	0.454082	0.714286	1	0.002551	0.267857	0.497449	0.755102	0.987245	0.387755	0.186224	0.42602	0.076726	0.081841	0	0.002551	0.280612	0.553571	0.77551	1	0.09949	0.262755	0.566327	0.798469	0.933673	0.007653	0.206633	0.466837	0.719388	0.987245	0.563776	0.393862	0.007653	0.27551	0.482143	0.729592	0.987245	0.27551
0.41573	0.2397	0.344569	0.184211	0.255639	0.199248	0.007491	0.247191	0.516854	0.794007	1	0.018727	0.235955	0.531835	0.696629	0.996255	0.003745	0.243446	0.464419	0.715356	0.981273	0.374532	0.183521	0.441948	0.06015	0.097744	0	0.003745	0.157303	0.426966	0.692884	1	0.048689	0.292135	0.404494	0.621723	0.719101	0.018727	0.265918	0.520599	0.82397	0.992509	0.546816	0.398496	0.011236	0.228464	0.464419	0.674157	0.996255	0.265918
0.437427	0.290058	0.272515	0.203747	0.237705	0.168618	0.003509	0.197661	0.490058	0.792982	1	0.004678	0.28538	0.511111	0.727485	0.997661	0.00117	0.28655	0.493567	0.701754	0.988304	0.490058	0.139181	0.37076	0.052693	0.07377	0.005855	0.00117	0.180117	0.397661	0.697076	1	0.003509	0.239766	0.449123	0.592982	0.739181	0.016374	0.375439	0.633918	0.847953	0.989474	0.425731	0.332553	0.005848	0.326316	0.504094	0.698246	0.988304	0.327485
0.357013	0.417122	0.225865	0.279197	0.156934	0.184307	0.007286	0.313297	0.546448	0.757741	1	0.005464	0.205829	0.477231	0.695811	0.992714	0.001821	0.233151	0.45173	0.797814	0.998179	0.71949	0.061931	0.218579	0.043796	0.069343	0.007299	0.001821	0.198543	0.48816	0.708561	1	0.116576	0.227687	0.318761	0.68306	0.994536	0.005464	0.418944	0.557377	0.899818	0.969035	0.433515	0.39781	0.010929	0.213115	0.473588	0.766849	0.994536	0.420765
0.336683	0.336683	0.326633	0.227273	0.207071	0.207071	0.025126	0.226131	0.487437	0.738693	0.98995	0.01005	0.211055	0.437186	0.703518	0.984925	0.005025	0.266332	0.527638	0.788945	1	0.301508	0.276382	0.422111	0.035354	0.075758	0.015152	0.005025	0.115578	0.351759	0.81407	1	0.055276	0.180905	0.537688	0.61809	0.688442	0.150754	0.326633	0.482412	0.849246	0.984925	0.517588	0.393939	0.020101	0.261307	0.507538	0.79397	0.984925	0.311558
0.357955	0.306818	0.335227	0.245714	0.245714	0.211429	0.017045	0.232955	0.471591	0.647727	0.965909	0.028409	0.267045	0.539773	0.8125	0.988636	0.005682	0.198864	0.494318	0.755682	1	0.431818	0.306818	0.261364	0.142857	0.062857	0.005714	0.005682	0.369318	0.585227	0.721591	1	0.130682	0.323864	0.431818	0.846591	0.994318	0.022727	0.079545	0.210227	0.5625	0.9375	0.448864	0.422857	0.022727	0.221591	0.579545	0.818182	0.994318	0.284091
0.334158	0.363861	0.30198	0.265509	0.203474	0.220844	0.00495	0.279703	0.579208	0.824257	1	0.007426	0.252475	0.507426	0.747525	0.997525	0.002475	0.215347	0.418317	0.643564	0.938119	0.356436	0.059406	0.584158	0.034739	0.08933	0.004963	0.002475	0.25495	0.591584	0.871287	1	0.042079	0.079208	0.094059	0.413366	0.962871	0.007426	0.294554	0.487624	0.660891	0.908416	0.534653	0.411911	0.009901	0.277228	0.517327	0.695545	0.987624	0.39604
0.334365	0.331269	0.334365	0.22314	0.231405	0.245868	0.004128	0.214654	0.480908	0.726522	0.998968	0.008256	0.257998	0.522188	0.75645	0.992776	0.001032	0.260062	0.49742	0.762642	1	0.465428	0.224974	0.309598	0.083678	0.069215	0.005165	0.001032	0.220846	0.449948	0.657379	1	0.003096	0.216718	0.499484	0.675955	0.988648	0.038184	0.293086	0.608875	0.816305	0.996904	0.561404	0.380165	0.007224	0.30031	0.54902	0.77709	0.996904	0.345717
0.33123	0.353312	0.315457	0.259494	0.177215	0.246835	0.012618	0.271293	0.520505	0.772871	0.990536	0.006309	0.176656	0.44795	0.694006	0.996845	0.003155	0.287066	0.514196	0.744479	1	0.403785	0.22082	0.375394	0.063291	0.063291	0	0.003155	0.157729	0.40694	0.637224	1	0.059937	0.208202	0.425868	0.782334	0.949527	0.097792	0.369085	0.574132	0.829653	0.987382	0.542587	0.316456	0.056782	0.239748	0.492114	0.722397	0.993691	0.394322
0.329333	0.412	0.258667	0.259012	0.193591	0.189586	0.004	0.256	0.5	0.726667	1	0.002667	0.186667	0.456	0.761333	0.996	0.001333	0.34	0.554667	0.746667	0.993333	0.618667	0.128	0.253333	0.056075	0.066756	0.00267	0.001333	0.170667	0.44	0.790667	1	0.008	0.4	0.646667	0.722667	0.977333	0.08	0.322667	0.52	0.684	0.968	0.517333	0.437917	0.008	0.221333	0.530667	0.742667	0.994667	0.38
0.333333	0.387387	0.279279	0.318182	0.154545	0.2	0.018018	0.189189	0.468468	0.711712	0.954955	0.036036	0.243243	0.459459	0.747748	1	0.009009	0.207207	0.495495	0.702703	0.990991	0.468468	0.315315	0.216216	0.109091	0.036364	0.018182	0.009009	0.27027	0.432432	0.81982	1	0.063063	0.387387	0.666667	0.783784	0.936937	0.054054	0.171171	0.468468	0.522523	0.576577	0.342342	0.363636	0.036036	0.135135	0.45045	0.666667	0.936937	0.396396
0.358974	0.333333	0.307692	0.267241	0.189655	0.198276	0.042735	0.188034	0.57265	0.794872	1	0.025641	0.299145	0.521368	0.752137	0.982906	0.008547	0.17094	0.393162	0.692308	0.965812	0.444444	0.230769	0.324786	0.103448	0.068966	0	0.008547	0.213675	0.521368	0.649573	1	0.17094	0.25641	0.350427	0.42735	0.564103	0.051282	0.119658	0.735043	0.846154	0.965812	0.410256	0.448276	0.034188	0.25641	0.478632	0.74359	0.965812	0.358974
0.327434	0.376106	0.29646	0.262222	0.213333	0.226667	0.00885	0.225664	0.469027	0.716814	1	0.013274	0.230088	0.495575	0.743363	0.995575	0.004425	0.265487	0.513274	0.747788	0.99115	0.464602	0.216814	0.318584	0.097778	0.08	0	0.004425	0.163717	0.393805	0.716814	1	0.088496	0.256637	0.49115	0.752212	0.973451	0.017699	0.371681	0.539823	0.787611	0.99115	0.460177	0.462222	0.017699	0.269912	0.495575	0.738938	0.973451	0.402655
0.313433	0.343284	0.343284	0.207265	0.230769	0.232906	0.004264	0.277186	0.528785	0.771855	1	0.014925	0.204691	0.462687	0.71855	0.997868	0.002132	0.245203	0.492537	0.739872	0.98081	0.439232	0.179104	0.381663	0.066239	0.074786	0.010684	0.002132	0.19403	0.428571	0.641791	1	0.040512	0.206823	0.351812	0.47548	0.73774	0.004264	0.307036	0.720682	0.861407	0.968017	0.573561	0.384615	0.006397	0.206823	0.441365	0.692964	0.98081	0.356077
0.353884	0.31566	0.330456	0.204938	0.264198	0.218519	0.007398	0.254007	0.504316	0.745993	0.998767	0.004932	0.251541	0.488286	0.749692	1	0.001233	0.235512	0.495684	0.750925	0.997534	0.471023	0.236745	0.292232	0.101235	0.054321	0.002469	0.001233	0.210851	0.487053	0.745993	1	0.039457	0.207152	0.420469	0.755857	0.997534	0.006165	0.323058	0.54254	0.706535	0.988903	0.564735	0.414815	0.003699	0.252774	0.475956	0.729963	0.997534	0.325524
0.339869	0.48366	0.176471	0.311475	0.147541	0.137705	0.055556	0.316993	0.470588	0.761438	0.973856	0.006536	0.153595	0.434641	0.748366	1	0.003268	0.398693	0.575163	0.718954	0.986928	0.699346	0.094771	0.205882	0.045902	0.039344	0	0.003268	0.205882	0.490196	0.816993	1	0.323529	0.578431	0.666667	0.718954	0.957516	0.006536	0.395425	0.447712	0.614379	0.75817	0.415033	0.334426	0.052288	0.199346	0.624183	0.862745	0.993464	0.477124
0.38843	0.38961	0.22196	0.276596	0.165485	0.161939	0.003542	0.272727	0.57379	0.782763	0.998819	0.002361	0.199528	0.433294	0.720189	1	0.001181	0.271547	0.493506	0.668241	0.988194	0.641086	0.085006	0.273908	0.037825	0.082742	0.007092	0.001181	0.250295	0.478158	0.752066	1	0.101535	0.475797	0.5549	0.635183	0.946871	0.023613	0.167651	0.486423	0.787485	0.995277	0.453365	0.352246	0.005903	0.257379	0.439197	0.624557	0.988194	0.416765
0.366154	0.307692	0.326154	0.240741	0.216049	0.222222	0.009231	0.283077	0.523077	0.766154	0.996923	0.006154	0.193846	0.387692	0.72	0.987692	0.003077	0.298462	0.498462	0.741538	1	0.436923	0.218462	0.344615	0.074074	0.067901	0	0.003077	0.190769	0.455385	0.704615	1	0.092308	0.230769	0.44	0.753846	0.938462	0.024615	0.387692	0.578462	0.827692	0.975385	0.532308	0.32716	0.024615	0.258462	0.486154	0.726154	0.987692	0.326154
0.436975	0.319328	0.243697	0.271186	0.177966	0.186441	0.016807	0.176471	0.512605	0.764706	1	0.033613	0.319328	0.546218	0.739496	0.991597	0.008403	0.252101	0.352941	0.571429	0.966387	0.722689	0.07563	0.201681	0.042373	0.076271	0.025424	0.008403	0.294118	0.571429	0.747899	1	0.260504	0.268908	0.285714	0.428571	0.789916	0.067227	0.12605	0.319328	0.369748	0.915966	0.252101	0.220339	0.10084	0.252101	0.336134	0.411765	0.89916	0.386555
0.382883	0.301802	0.315315	0.198646	0.23702	0.189616	0.004505	0.292793	0.538288	0.77027	1	0.006757	0.168919	0.405405	0.655405	0.997748	0.002252	0.29955	0.540541	0.761261	0.995495	0.445946	0.236486	0.317568	0.090293	0.076749	0	0.002252	0.177928	0.466216	0.725225	1	0.094595	0.254505	0.432432	0.707207	0.95045	0.058559	0.308559	0.603604	0.824324	0.995495	0.418919	0.329571	0.015766	0.274775	0.488739	0.716216	0.993243	0.31982
0.348765	0.354938	0.296296	0.225657	0.213292	0.208655	0.013889	0.268519	0.516975	0.794753	0.996914	0.003086	0.179012	0.447531	0.722222	1	0.001543	0.299383	0.537037	0.740741	0.998457	0.50463	0.166667	0.328704	0.068006	0.071097	0.006182	0.001543	0.16821	0.344136	0.649691	1	0.018519	0.353395	0.609568	0.760802	0.912037	0.050926	0.41821	0.583333	0.810185	0.976852	0.513889	0.374034	0.010802	0.32716	0.537037	0.746914	0.998457	0.376543
0.37561	0.35122	0.273171	0.269608	0.254902	0.181373	0.014634	0.195122	0.419512	0.692683	1	0.009756	0.239024	0.502439	0.765854	0.995122	0.004878	0.356098	0.560976	0.77561	0.985366	0.502439	0.165854	0.331707	0.068627	0.088235	0.009804	0.004878	0.156098	0.521951	0.77561	1	0.219512	0.282927	0.619512	0.946341	0.990244	0.039024	0.341463	0.439024	0.721951	0.926829	0.458537	0.470588	0.019512	0.360976	0.517073	0.746341	0.985366	0.317073
0.38756	0.296651	0.315789	0.197115	0.235577	0.201923	0.014354	0.239234	0.449761	0.717703	0.995215	0.009569	0.167464	0.511962	0.77512	1	0.004785	0.311005	0.516746	0.746411	0.980861	0.45933	0.15311	0.38756	0.057692	0.067308	0.019231	0.004785	0.148325	0.521531	0.755981	1	0.210526	0.473684	0.607656	0.942584	0.980861	0.038278	0.30622	0.416268	0.712919	0.913876	0.492823	0.432692	0.019139	0.334928	0.502392	0.727273	0.980861	0.301435
0.373626	0.344041	0.282333	0.236041	0.205584	0.193739	0.002536	0.202029	0.431107	0.716822	0.999155	0.001691	0.258664	0.509721	0.75317	0.995773	0.000845	0.344041	0.543533	0.764159	1	0.415046	0.114117	0.470837	0.038917	0.093063	0.003384	0.000845	0.209637	0.46492	0.726965	1	0.034658	0.474218	0.621302	0.897718	0.989856	0.003381	0.248521	0.482671	0.760778	0.993238	0.457312	0.328257	0.003381	0.393068	0.596788	0.795435	0.997464	0.373626
0.282369	0.370523	0.347107	0.209655	0.201379	0.262069	0.008264	0.279614	0.506887	0.772727	0.998623	0.002755	0.230028	0.487603	0.758953	0.997245	0.001377	0.23416	0.49449	0.719008	1	0.374656	0.11708	0.508264	0.046897	0.093793	0.002759	0.001377	0.260331	0.545455	0.790634	1	0.006887	0.085399	0.252066	0.581267	0.805785	0.0427	0.287879	0.493113	0.754821	0.993113	0.57438	0.342069	0.009642	0.230028	0.509642	0.736915	0.980716	0.402204
0.377323	0.29368	0.328996	0.227188	0.236499	0.216015	0.005576	0.249071	0.494424	0.728625	1	0.003717	0.230483	0.5	0.750929	0.994424	0.001859	0.254647	0.492565	0.756506	0.996283	0.364312	0.105948	0.52974	0.037244	0.096834	0	0.001859	0.217472	0.468401	0.633829	1	0.072491	0.386617	0.494424	0.929368	0.960967	0.037175	0.249071	0.557621	0.767658	0.992565	0.535316	0.372439	0.007435	0.226766	0.475836	0.715613	0.994424	0.258364
0.359736	0.330033	0.310231	0.261589	0.192053	0.241722	0.013201	0.264026	0.452145	0.759076	1	0.006601	0.254125	0.544554	0.735974	0.993399	0.0033	0.221122	0.514851	0.726073	0.980198	0.491749	0.181518	0.326733	0.069536	0.076159	0.009934	0.0033	0.30033	0.518152	0.772277	1	0.059406	0.125413	0.570957	0.775578	0.943894	0.023102	0.237624	0.462046	0.712871	0.966997	0.429043	0.397351	0.016502	0.214521	0.438944	0.693069	0.993399	0.382838
0.360902	0.323308	0.315789	0.272727	0.227273	0.174242	0.037594	0.285714	0.466165	0.706767	0.984962	0.015038	0.180451	0.526316	0.774436	1	0.007519	0.240602	0.481203	0.766917	0.992481	0.368421	0.345865	0.285714	0.143939	0.05303	0.007576	0.007519	0.338346	0.556391	0.721805	1	0.180451	0.383459	0.586466	0.81203	0.992481	0.030075	0.090226	0.24812	0.315789	0.917293	0.458647	0.439394	0.037594	0.240602	0.503759	0.789474	0.992481	0.338346
0.384615	0.438034	0.17735	0.351178	0.119914	0.139186	0.008547	0.241453	0.542735	0.799145	0.997863	0.004274	0.237179	0.459402	0.692308	1	0.002137	0.262821	0.514957	0.730769	0.976496	0.75	0.123932	0.126068	0.047109	0.055675	0.008565	0.002137	0.224359	0.440171	0.724359	1	0.044872	0.311966	0.730769	0.846154	0.978632	0.141026	0.482906	0.523504	0.653846	0.948718	0.344017	0.295503	0.047009	0.258547	0.491453	0.698718	0.980769	0.463675
0.344828	0.301724	0.353448	0.246753	0.229437	0.212121	0.021552	0.206897	0.530172	0.784483	0.991379	0.008621	0.258621	0.400862	0.668103	0.99569	0.00431	0.271552	0.50431	0.758621	1	0.456897	0.288793	0.25431	0.095238	0.051948	0.008658	0.00431	0.168103	0.375	0.663793	1	0.025862	0.185345	0.456897	0.75	0.978448	0.25	0.405172	0.586207	0.780172	0.87069	0.603448	0.380952	0.012931	0.271552	0.482759	0.711207	0.982759	0.275862
0.396914	0.237027	0.366059	0.179775	0.327247	0.174157	0.008415	0.26648	0.527349	0.771388	1	0.00561	0.246844	0.486676	0.704067	0.997195	0.001403	0.232819	0.472651	0.740533	0.998597	0.460028	0.225806	0.314165	0.095506	0.064607	0.002809	0.001403	0.210379	0.436185	0.750351	1	0.044881	0.151473	0.420757	0.837307	0.976157	0.007013	0.342216	0.565217	0.726508	0.997195	0.59467	0.41573	0.004208	0.255259	0.486676	0.741935	0.997195	0.237027
0.388005	0.359853	0.252142	0.259804	0.189951	0.186275	0.002448	0.198286	0.477356	0.74541	1	0.004896	0.27907	0.511628	0.761322	0.995104	0.001224	0.307222	0.50918	0.728274	0.996328	0.518972	0.132191	0.348837	0.050245	0.08701	0.006127	0.001224	0.177479	0.396573	0.725826	1	0.04284	0.358629	0.559364	0.698898	0.990208	0.045288	0.365973	0.575275	0.80661	0.979192	0.433293	0.311275	0.04284	0.362301	0.528764	0.734394	0.996328	0.400245
0.297143	0.411429	0.291429	0.293103	0.172414	0.201149	0.022857	0.365714	0.571429	0.805714	1	0.011429	0.194286	0.377143	0.691429	0.994286	0.005714	0.245714	0.497143	0.754286	0.971429	0.28	0.28	0.44	0.04023	0.109195	0.017241	0.005714	0.154286	0.285714	0.588571	1	0.234286	0.76	0.828571	0.908571	0.982857	0.011429	0.2	0.445714	0.577143	0.748571	0.445714	0.505747	0.017143	0.262857	0.497143	0.691429	0.971429	0.434286
0.312253	0.371542	0.316206	0.230159	0.178571	0.246032	0.011858	0.185771	0.391304	0.774704	1	0.007905	0.332016	0.541502	0.72332	0.996047	0.003953	0.252964	0.490119	0.719368	0.992095	0.387352	0.01581	0.596838	0.003968	0.138889	0.011905	0.003953	0.328063	0.537549	0.648221	1	0.422925	0.422925	0.426877	0.494071	0.498024	0.01581	0.177866	0.44664	0.778656	0.992095	0.545455	0.388889	0.023715	0.26087	0.505929	0.699605	0.976285	0.403162
0.479339	0.256198	0.264463	0.225	0.25	0.158333	0.016529	0.272727	0.603306	0.818182	1	0.033058	0.132231	0.404959	0.661157	0.975207	0.008264	0.247934	0.429752	0.669421	0.85124	0.396694	0.239669	0.363636	0.083333	0.083333	0.016667	0.008264	0.338843	0.553719	0.826446	1	0.033058	0.082645	0.404959	0.512397	0.760331	0.132231	0.214876	0.595041	0.710744	0.966942	0.429752	0.4	0.033058	0.214876	0.479339	0.652893	0.942149	0.214876
0.358696	0.434783	0.206522	0.384615	0.142857	0.197802	0.032609	0.163043	0.358696	0.652174	0.956522	0.021739	0.25	0.521739	0.73913	1	0.01087	0.336957	0.554348	0.782609	0.934783	0.163043	0	0.836957	0	0.065934	0	0.01087	0.032609	0.467391	0.728261	1	0	0	0	0	0	0.054348	0.25	0.48913	0.771739	0.98913	0.282609	0.417582	0.076087	0.304348	0.543478	0.673913	0.945652	0.423913
0.331126	0.331126	0.337748	0.246667	0.22	0.213333	0.013245	0.231788	0.443709	0.695364	0.993377	0.05298	0.225166	0.456954	0.688742	1	0.006623	0.245033	0.543046	0.794702	0.97351	0.370861	0.298013	0.331126	0.126667	0.046667	0.006667	0.006623	0.145695	0.562914	0.774834	1	0.013245	0.238411	0.596026	0.860927	0.960265	0.165563	0.317881	0.403974	0.483444	0.807947	0.384106	0.466667	0.019868	0.198675	0.523179	0.721854	0.953642	0.377483
0.415873	0.260317	0.32381	0.191083	0.321656	0.178344	0.009524	0.273016	0.520635	0.726984	1	0.019048	0.184127	0.422222	0.75873	0.993651	0.003175	0.247619	0.501587	0.777778	0.996825	0.212698	0.066667	0.720635	0.041401	0.079618	0.003185	0.003175	0.184127	0.412698	0.539683	1	0.11746	0.396825	0.485714	0.533333	0.996825	0.012698	0.263492	0.565079	0.755556	0.971429	0.450794	0.528662	0.012698	0.212698	0.47619	0.777778	0.996825	0.307937
0.318267	0.374765	0.306968	0.19434	0.19434	0.215094	0.024482	0.231638	0.442561	0.696798	0.992467	0.003766	0.20339	0.512241	0.764595	1	0.001883	0.293785	0.544256	0.777778	0.996234	0.517891	0.171375	0.310734	0.05283	0.090566	0.003774	0.001883	0.146893	0.423729	0.696798	1	0.099812	0.274953	0.704331	0.86064	0.932203	0.050847	0.39548	0.521657	0.734463	0.996234	0.514124	0.384906	0.00565	0.278719	0.517891	0.79096	0.996234	0.397363
0.344322	0.379121	0.276557	0.247706	0.19633	0.190826	0.005495	0.241758	0.525641	0.74359	0.994505	0.003663	0.161172	0.404762	0.750916	1	0.001832	0.347985	0.542125	0.749084	0.992674	0.532967	0.152015	0.315018	0.056881	0.06422	0.005505	0.001832	0.135531	0.283883	0.652015	1	0.227106	0.490842	0.64652	0.809524	0.915751	0.038462	0.423077	0.580586	0.785714	0.990842	0.492674	0.366972	0.010989	0.364469	0.542125	0.763736	0.990842	0.443223
0.325967	0.314917	0.359116	0.183333	0.25	0.216667	0.016575	0.171271	0.364641	0.718232	0.977901	0.033149	0.342541	0.59116	0.723757	0.98895	0.005525	0.270718	0.458564	0.740331	1	0.486188	0.292818	0.220994	0.111111	0.055556	0	0.005525	0.237569	0.497238	0.696133	1	0.265193	0.342541	0.635359	0.823204	0.994475	0.099448	0.149171	0.226519	0.552486	0.872928	0.530387	0.411111	0.027624	0.375691	0.563536	0.78453	0.994475	0.337017
0.39011	0.274725	0.335165	0.206612	0.267218	0.217631	0.005495	0.282967	0.519231	0.774725	0.997253	0.019231	0.241758	0.497253	0.695055	0.991758	0.002747	0.21978	0.478022	0.728022	1	0.543956	0.178571	0.277473	0.063361	0.052342	0.008264	0.002747	0.277473	0.480769	0.741758	1	0.076923	0.14011	0.667582	0.799451	0.994505	0.038462	0.228022	0.392857	0.722527	0.912088	0.453297	0.380165	0.016484	0.239011	0.510989	0.730769	0.986264	0.326923
0.353712	0.371179	0.275109	0.219298	0.197368	0.201754	0.0131	0.174672	0.471616	0.768559	1	0.008734	0.218341	0.414847	0.68559	0.978166	0.004367	0.393013	0.580786	0.772926	0.9869	0.572052	0.270742	0.157205	0.083333	0.030702	0.004386	0.004367	0.231441	0.436681	0.759825	1	0.253275	0.449782	0.554585	0.812227	0.991266	0.117904	0.152838	0.19214	0.606987	0.847162	0.454148	0.359649	0.135371	0.318777	0.558952	0.746725	0.9869	0.393013
0.359629	0.322506	0.317865	0.22093	0.202326	0.216279	0.013921	0.243619	0.468677	0.807425	0.986079	0.00464	0.276102	0.522042	0.721578	0.99536	0.00232	0.234339	0.470998	0.700696	1	0.461717	0.092807	0.445476	0.037209	0.088372	0.004651	0.00232	0.211137	0.477958	0.791183	1	0.006961	0.090487	0.25522	0.802784	0.911833	0.109049	0.354988	0.531323	0.712297	0.99536	0.554524	0.344186	0.009281	0.315545	0.524362	0.712297	0.990719	0.345708
0.431579	0.210526	0.357895	0.148936	0.297872	0.191489	0.031579	0.2	0.431579	0.663158	0.968421	0.021053	0.463158	0.673684	0.894737	0.989474	0.010526	0.242105	0.421053	0.705263	1	0.4	0.042105	0.557895	0.042553	0.085106	0	0.010526	0.494737	0.610526	0.757895	1	0.568421	0.568421	0.947368	0.957895	0.968421	0.031579	0.157895	0.336842	0.694737	0.873684	0.4	0.425532	0.052632	0.378947	0.631579	0.768421	0.947368	0.189474
0.33526	0.346821	0.317919	0.215116	0.238372	0.215116	0.017341	0.236994	0.450867	0.722543	0.99422	0.011561	0.219653	0.485549	0.745665	0.982659	0.00578	0.242775	0.526012	0.751445	1	0.462428	0.127168	0.410405	0.05814	0.104651	0.023256	0.00578	0.156069	0.595376	0.780347	1	0.283237	0.346821	0.699422	0.745665	0.988439	0.046243	0.312139	0.445087	0.566474	0.930636	0.462428	0.430233	0.023121	0.404624	0.572254	0.710983	0.988439	0.306358
0.358108	0.378378	0.263514	0.333333	0.210884	0.136054	0.054054	0.331081	0.540541	0.702703	0.993243	0.02027	0.22973	0.614865	0.831081	1	0.006757	0.128378	0.304054	0.513514	0.871622	0.506757	0.371622	0.121622	0.108844	0.027211	0	0.006757	0.425676	0.675676	0.810811	1	0.094595	0.189189	0.304054	0.452703	0.871622	0.027027	0.047297	0.5	0.527027	0.560811	0.47973	0.367347	0.02027	0.243243	0.452703	0.817568	0.986486	0.412162
0.378007	0.257732	0.364261	0.2	0.275862	0.17931	0.006873	0.316151	0.553265	0.742268	0.975945	0.010309	0.158076	0.38488	0.745704	0.993127	0.003436	0.278351	0.501718	0.735395	1	0.381443	0.268041	0.350515	0.072414	0.051724	0.003448	0.003436	0.216495	0.446735	0.752577	1	0.013746	0.182131	0.522337	0.783505	0.955326	0.054983	0.274914	0.491409	0.67354	0.910653	0.573883	0.337931	0.010309	0.199313	0.43299	0.714777	0.989691	0.278351
0.325714	0.379048	0.295238	0.232824	0.192748	0.221374	0.011429	0.268571	0.48	0.805714	1	0.00381	0.241905	0.554286	0.779048	0.986667	0.001905	0.198095	0.441905	0.641905	0.998095	0.466667	0.07619	0.457143	0.028626	0.078244	0.005725	0.001905	0.262857	0.617143	0.84381	1	0.059048	0.171429	0.220952	0.598095	0.986667	0.005714	0.314286	0.48	0.645714	0.99619	0.525714	0.320611	0.007619	0.234286	0.481905	0.666667	0.99619	0.417143
0.357895	0.315789	0.326316	0.276596	0.180851	0.191489	0.031579	0.221053	0.473684	0.747368	1	0.042105	0.136842	0.4	0.642105	0.989474	0.010526	0.326316	0.547368	0.831579	0.968421	0.6	0.031579	0.368421	0.042553	0.085106	0	0.010526	0.221053	0.368421	0.631579	1	0.421053	0.421053	0.421053	0.431579	0.621053	0.136842	0.484211	0.736842	0.831579	0.936842	0.347368	0.382979	0.157895	0.473684	0.631579	0.831579	0.957895	0.336842
0.341463	0.296167	0.362369	0.192308	0.22028	0.255245	0.006969	0.261324	0.519164	0.770035	0.993031	0.017422	0.195122	0.466899	0.724739	0.996516	0.003484	0.296167	0.512195	0.735192	1	0.400697	0.236934	0.362369	0.076923	0.055944	0	0.003484	0.191638	0.452962	0.658537	1	0.020906	0.1777	0.421603	0.801394	0.982578	0.069686	0.362369	0.567944	0.839721	0.933798	0.581882	0.328671	0.017422	0.212544	0.442509	0.71777	0.982578	0.264808
0.300173	0.473183	0.226644	0.231169	0.137662	0.227706	0.004325	0.345156	0.58737	0.799308	0.999135	0.00173	0.207612	0.372837	0.643599	0.991349	0.000865	0.360727	0.634948	0.803633	1	0.758651	0.08045	0.1609	0.029437	0.036364	0.001732	0.000865	0.200692	0.390138	0.579585	1	0.009516	0.705882	0.801038	0.872837	0.958478	0.079585	0.687716	0.787197	0.897924	0.987889	0.675606	0.245887	0.002595	0.219723	0.393599	0.690311	0.985294	0.525087
0.34188	0.358974	0.299145	0.215517	0.215517	0.224138	0.051282	0.213675	0.42735	0.709402	0.991453	0.017094	0.299145	0.615385	0.735043	1	0.008547	0.179487	0.444444	0.74359	0.982906	0.367521	0.179487	0.452991	0.086207	0.103448	0	0.008547	0.358974	0.57265	0.760684	1	0.025641	0.059829	0.393162	0.623932	0.820513	0.094017	0.196581	0.478632	0.709402	0.982906	0.512821	0.396552	0.034188	0.324786	0.512821	0.717949	0.982906	0.367521
0.358416	0.346535	0.29505	0.248016	0.202381	0.19246	0.005941	0.281188	0.562376	0.772277	1	0.00396	0.160396	0.374257	0.710891	0.994059	0.00198	0.338614	0.540594	0.746535	0.99802	0.485149	0.156436	0.358416	0.053571	0.069444	0.005952	0.00198	0.120792	0.334653	0.687129	1	0.172277	0.445545	0.615842	0.79802	0.914851	0.20198	0.368317	0.544554	0.776238	0.99604	0.522772	0.353175	0.013861	0.322772	0.512871	0.752475	0.99604	0.39604
0.331126	0.377483	0.291391	0.229236	0.229236	0.196013	0.013245	0.235099	0.47351	0.738411	0.996689	0.006623	0.261589	0.536424	0.811258	0.986755	0.003311	0.241722	0.460265	0.675497	1	0.453642	0.162252	0.384106	0.046512	0.07309	0	0.003311	0.258278	0.509934	0.837748	1	0.122517	0.274834	0.354305	0.562914	0.649007	0.033113	0.241722	0.486755	0.761589	0.903974	0.559603	0.41196	0.019868	0.231788	0.470199	0.705298	0.986755	0.427152
0.305753	0.37037	0.323877	0.235804	0.180599	0.240536	0.00394	0.251379	0.503546	0.762805	0.998424	0.001576	0.263987	0.492514	0.718676	0.994484	0.000788	0.233255	0.506698	0.768322	1	0.483846	0.431836	0.084318	0.136435	0.021293	0.003943	0.000788	0.245863	0.465721	0.711584	1	0.010244	0.222222	0.494878	0.739165	0.925138	0.002364	0.371946	0.929866	0.970843	0.998424	0.639874	0.301262	0.002364	0.256107	0.513002	0.745469	0.999212	0.399527
0.328063	0.355731	0.316206	0.238095	0.202381	0.230159	0.01581	0.252964	0.466403	0.750988	1	0.011858	0.245059	0.549407	0.794466	0.988142	0.003953	0.217391	0.462451	0.699605	0.992095	0.312253	0.083004	0.604743	0.035714	0.115079	0.003968	0.003953	0.150198	0.462451	0.782609	1	0.201581	0.806324	0.857708	0.87747	0.909091	0.011858	0.27668	0.454545	0.648221	0.992095	0.529644	0.365079	0.007905	0.256917	0.438735	0.656126	0.992095	0.383399
0.216567	0.502994	0.280439	0.155844	0.135864	0.308691	0.005988	0.316367	0.478044	0.611776	0.996008	0.001996	0.233533	0.552894	0.769461	1	0.000998	0.231537	0.474052	0.720559	0.999002	0.737525	0.132735	0.129741	0.053946	0.033966	0	0.000998	0.243513	0.52994	0.763473	1	0.001996	0.287425	0.463074	0.615768	0.999002	0.015968	0.316367	0.449102	0.597804	0.98503	0.583832	0.337662	0.001996	0.261477	0.58982	0.795409	0.999002	0.503992
0.296748	0.52439	0.178862	0.310204	0.126531	0.155102	0.01626	0.321138	0.528455	0.756098	1	0.00813	0.191057	0.504065	0.764228	0.987805	0.004065	0.296748	0.443089	0.601626	0.995935	0.833333	0.146341	0.020325	0.061224	0.012245	0.004082	0.004065	0.207317	0.544715	0.780488	1	0.276423	0.333333	0.443089	0.5	0.926829	0.268293	0.268293	0.272358	0.609756	0.617886	0.654472	0.253061	0.00813	0.166667	0.386179	0.752033	0.995935	0.556911
0.350711	0.364929	0.28436	0.238095	0.261905	0.171429	0.009479	0.21327	0.445498	0.687204	1	0.037915	0.28436	0.56872	0.862559	0.985782	0.004739	0.251185	0.450237	0.677725	0.85782	0.445498	0.379147	0.175355	0.119048	0.071429	0.004762	0.004739	0.274882	0.601896	0.815166	1	0.014218	0.293839	0.436019	0.611374	0.853081	0.080569	0.218009	0.260664	0.748815	0.990521	0.421801	0.447619	0.018957	0.246445	0.436019	0.672986	0.943128	0.398104
0.309091	0.4	0.290909	0.22561	0.213415	0.231707	0.024242	0.224242	0.442424	0.739394	0.987879	0.012121	0.272727	0.539394	0.775758	1	0.006061	0.212121	0.436364	0.709091	0.957576	0.266667	0.157576	0.575758	0.054878	0.103659	0.006098	0.006061	0.2	0.466667	0.70303	1	0.151515	0.309091	0.490909	0.648485	0.709091	0.030303	0.242424	0.551515	0.824242	0.987879	0.49697	0.47561	0.048485	0.30303	0.50303	0.715152	0.957576	0.418182
0.448276	0.364532	0.187192	0.337171	0.143092	0.157895	0.004926	0.228243	0.382594	0.650246	0.995074	0.003284	0.188834	0.472906	0.727422	1	0.001642	0.546798	0.692939	0.863711	0.996716	0.663383	0.085386	0.251232	0.03125	0.067434	0.004934	0.001642	0.183908	0.349754	0.617406	1	0.047619	0.614122	0.707718	0.821018	0.906404	0.029557	0.535304	0.668309	0.885057	0.995074	0.308703	0.213816	0.00821	0.579639	0.706076	0.850575	0.99179	0.425287
0.434555	0.356021	0.209424	0.335958	0.160105	0.15748	0.007853	0.267016	0.486911	0.730366	1	0.005236	0.269634	0.554974	0.740838	0.997382	0.002618	0.175393	0.390052	0.753927	0.994764	0.725131	0.086387	0.188482	0.031496	0.068241	0.010499	0.002618	0.209424	0.429319	0.667539	1	0.235602	0.298429	0.649215	0.798429	0.984293	0.099476	0.510471	0.696335	0.856021	0.989529	0.329843	0.278215	0.028796	0.240838	0.5	0.743455	0.994764	0.387435
0.346977	0.382326	0.270698	0.250466	0.17784	0.216015	0.00186	0.28093	0.538605	0.823256	0.996279	0.006512	0.185116	0.426977	0.72093	1	0.00093	0.300465	0.537674	0.705116	0.992558	0.619535	0.073488	0.306977	0.040037	0.062384	0.004655	0.00093	0.204651	0.421395	0.817674	1	0.021395	0.091163	0.274419	0.84186	0.996279	0.004651	0.490233	0.59814	0.707907	0.873488	0.555349	0.396648	0.006512	0.335814	0.541395	0.76	0.99814	0.382326
0.316832	0.368317	0.314851	0.240079	0.188492	0.257937	0.005941	0.275248	0.534653	0.790099	0.99604	0.011881	0.253465	0.510891	0.730693	1	0.00198	0.19604	0.457426	0.720792	0.99802	0.524752	0.160396	0.314851	0.081349	0.077381	0.001984	0.00198	0.273267	0.566337	0.809901	1	0.071287	0.285149	0.481188	0.718812	0.972277	0.011881	0.19604	0.423762	0.669307	0.990099	0.534653	0.365079	0.007921	0.243564	0.471287	0.752475	0.990099	0.39802
0.268293	0.436585	0.295122	0.233211	0.168498	0.279609	0.002439	0.276829	0.521951	0.760976	1	0.004878	0.221951	0.496341	0.726829	0.995122	0.00122	0.235366	0.480488	0.757317	0.996341	0.465854	0.263415	0.270732	0.108669	0.064713	0.003663	0.00122	0.209756	0.446341	0.704878	1	0.002439	0.25	0.431707	0.803659	0.960976	0.006098	0.32439	0.563415	0.767073	0.997561	0.55122	0.400488	0.003659	0.27439	0.481707	0.742683	0.992683	0.465854
0.294118	0.372549	0.333333	0.16	0.18	0.32	0.058824	0.215686	0.54902	0.823529	1	0.039216	0.196078	0.509804	0.72549	0.980392	0.019608	0.176471	0.372549	0.529412	0.941176	0.470588	0.27451	0.254902	0.08	0.12	0	0.019608	0.196078	0.509804	0.843137	1	0.058824	0.098039	0.313725	0.372549	0.45098	0.529412	0.568627	0.627451	0.686275	0.901961	0.45098	0.4	0.078431	0.294118	0.411765	0.588235	0.941176	0.431373
0.356209	0.398693	0.245098	0.291803	0.157377	0.22623	0.006536	0.271242	0.5	0.751634	1	0.009804	0.24183	0.53268	0.781046	0.996732	0.003268	0.232026	0.447712	0.669935	0.980392	0.565359	0.169935	0.264706	0.068852	0.068852	0.003279	0.003268	0.20915	0.398693	0.702614	1	0.101307	0.156863	0.447712	0.578431	0.869281	0.01634	0.519608	0.696078	0.908497	0.977124	0.418301	0.367213	0.019608	0.248366	0.473856	0.650327	0.990196	0.401961
0.325112	0.369955	0.304933	0.229213	0.211236	0.240449	0.011211	0.206278	0.419283	0.704036	0.997758	0.006726	0.295964	0.538117	0.784753	1	0.002242	0.230942	0.484305	0.737668	0.993274	0.381166	0.123318	0.495516	0.053933	0.094382	0	0.002242	0.394619	0.585202	0.782511	1	0.403587	0.571749	0.690583	0.85426	0.995516	0.008969	0.165919	0.320628	0.607623	0.896861	0.585202	0.319101	0.008969	0.226457	0.506726	0.706278	0.993274	0.396861
0.384236	0.197044	0.418719	0.108911	0.341584	0.188119	0.014778	0.275862	0.541872	0.719212	1	0.009852	0.157635	0.55665	0.827586	0.940887	0.004926	0.236453	0.438424	0.694581	0.970443	0.359606	0.246305	0.394089	0.089109	0.059406	0.009901	0.004926	0.128079	0.472906	0.82266	1	0.049261	0.275862	0.384236	0.729064	0.970443	0.133005	0.226601	0.55665	0.655172	0.8867	0.551724	0.475248	0.024631	0.256158	0.517241	0.753695	0.970443	0.167488
0.28363	0.458671	0.257699	0.23539	0.167208	0.211039	0.003241	0.333874	0.549433	0.764992	0.983793	0.004862	0.19611	0.439222	0.748784	1	0.001621	0.28363	0.487844	0.71799	0.996759	0.675851	0.111831	0.212318	0.053571	0.056818	0.001623	0.001621	0.212318	0.453809	0.753647	1	0.037277	0.371151	0.539708	0.692058	0.952998	0.004862	0.23987	0.555916	0.779579	0.983793	0.452188	0.36039	0.008104	0.215559	0.491086	0.740681	0.990276	0.442464
0.388298	0.340426	0.271277	0.261333	0.210667	0.165333	0.007979	0.319149	0.510638	0.771277	1	0.005319	0.239362	0.473404	0.718085	0.992021	0.00266	0.18883	0.56117	0.74734	0.99734	0.523936	0.180851	0.295213	0.104	0.066667	0.002667	0.00266	0.337766	0.529255	0.792553	1	0.148936	0.582447	0.702128	0.784574	0.981383	0.007979	0.114362	0.255319	0.462766	0.885638	0.412234	0.336	0.010638	0.204787	0.569149	0.744681	0.99734	0.37766
0.378446	0.323308	0.298246	0.228356	0.209536	0.200753	0.003759	0.205514	0.510025	0.775689	1	0.002506	0.243108	0.491228	0.73183	0.997494	0.001253	0.266917	0.488722	0.734336	0.998747	0.570175	0.139098	0.290727	0.058971	0.091593	0.003764	0.001253	0.263158	0.551378	0.750627	1	0.098997	0.333333	0.535088	0.738095	0.907268	0.011278	0.121554	0.373434	0.759398	0.988722	0.462406	0.311167	0.015038	0.23183	0.432331	0.740602	0.989975	0.35213
0.295652	0.42029	0.284058	0.209572	0.183466	0.211748	0.002174	0.206522	0.433333	0.672464	0.994203	0.001449	0.269565	0.595652	0.868116	1	0.000725	0.268116	0.471739	0.675362	0.991304	0.534783	0.12971	0.335507	0.052937	0.06599	0.003626	0.000725	0.242754	0.555797	0.86087	1	0.015217	0.299275	0.476087	0.562319	0.985507	0.002899	0.245652	0.464493	0.657971	0.826087	0.601449	0.31037	0.002899	0.324638	0.57971	0.845652	0.998551	0.418841
0.354535	0.285041	0.360424	0.193396	0.246462	0.205189	0.004711	0.268551	0.514723	0.791519	1	0.003534	0.281508	0.507656	0.727915	0.998822	0.001178	0.203769	0.468787	0.722026	0.992933	0.3298	0.189635	0.480565	0.069575	0.083726	0.003538	0.001178	0.314488	0.539458	0.762073	1	0.146054	0.308598	0.546525	0.829211	0.995289	0.011779	0.166078	0.436985	0.689046	0.96702	0.542992	0.382075	0.010601	0.274441	0.475854	0.705536	0.992933	0.286219
0.400915	0.306402	0.292683	0.225954	0.206107	0.174046	0.009146	0.179878	0.448171	0.757622	1	0.003049	0.256098	0.47561	0.731707	0.993902	0.001524	0.342988	0.570122	0.76372	0.998476	0.286585	0.004573	0.708841	0.00458	0.117557	0.001527	0.001524	0.152439	0.484756	0.817073	1	0.02439	0.02439	0.02439	0.045732	0.047256	0.022866	0.286585	0.501524	0.731707	0.996951	0.507622	0.39084	0.006098	0.32622	0.525915	0.746951	0.996951	0.318598
0.342357	0.356688	0.300955	0.236045	0.220096	0.218501	0.003185	0.213376	0.414013	0.694268	0.993631	0.007962	0.242038	0.542994	0.737261	1	0.001592	0.30414	0.523885	0.778662	0.996815	0.514331	0.171975	0.313694	0.057416	0.073365	0.00319	0.001592	0.154459	0.466561	0.711783	1	0.017516	0.211783	0.436306	0.773885	0.893312	0.179936	0.36465	0.584395	0.724522	0.996815	0.479299	0.417863	0.007962	0.242038	0.479299	0.759554	0.996815	0.390127
0.350515	0.247423	0.402062	0.177083	0.322917	0.239583	0.092784	0.237113	0.525773	0.721649	0.969072	0.030928	0.134021	0.340206	0.618557	0.989691	0.010309	0.298969	0.515464	0.752577	1	0.350515	0.443299	0.206186	0.177083	0.052083	0.010417	0.010309	0.134021	0.525773	0.71134	1	0.030928	0.298969	0.649485	0.793814	0.989691	0.14433	0.185567	0.453608	0.505155	0.587629	0.474227	0.5	0.020619	0.28866	0.525773	0.773196	0.979381	0.237113
0.395722	0.315508	0.28877	0.241935	0.268817	0.123656	0.010695	0.294118	0.55615	0.786096	1	0.026738	0.160428	0.395722	0.727273	0.962567	0.005348	0.235294	0.518717	0.705882	0.994652	0.411765	0.085561	0.502674	0.05914	0.080645	0.005376	0.005348	0.197861	0.44385	0.684492	1	0.139037	0.176471	0.299465	0.320856	0.989305	0.032086	0.374332	0.566845	0.775401	0.967914	0.411765	0.397849	0.02139	0.165775	0.385027	0.657754	0.983957	0.347594
0.320482	0.40241	0.277108	0.252111	0.190591	0.230398	0.00241	0.268675	0.53012	0.76506	1	0.004819	0.240964	0.491566	0.744578	0.993976	0.001205	0.237349	0.478313	0.745783	0.996386	0.486747	0.228916	0.284337	0.101327	0.057901	0.002413	0.001205	0.213253	0.486747	0.742169	1	0.037349	0.206024	0.409639	0.750602	0.996386	0.006024	0.327711	0.571084	0.703614	0.991566	0.553012	0.393245	0.003614	0.246988	0.468675	0.722892	0.996386	0.473494
0.370474	0.337047	0.292479	0.215084	0.251397	0.164804	0.008357	0.253482	0.479109	0.70195	1	0.02507	0.320334	0.526462	0.777159	0.994429	0.002786	0.214485	0.51532	0.724234	0.997214	0.440111	0.197772	0.362117	0.125698	0.055866	0.011173	0.002786	0.37883	0.562674	0.802228	0.991643	0.008357	0.590529	0.715877	0.832869	1	0.011142	0.153203	0.245125	0.437326	0.902507	0.420613	0.402235	0.005571	0.197772	0.568245	0.746518	0.997214	0.376045
0.450704	0.309859	0.239437	0.271429	0.285714	0.128571	0.098592	0.28169	0.591549	0.816901	1	0.028169	0.211268	0.521127	0.619718	0.915493	0.014085	0.084507	0.338028	0.661972	0.943662	0.295775	0	0.704225	0	0.114286	0	0.014085	0.070423	0.535211	0.605634	1	0	0	0	0	0	0.084507	0.28169	0.464789	0.746479	0.957746	0.338028	0.457143	0.056338	0.295775	0.450704	0.71831	0.943662	0.352113
0.209644	0.561845	0.228512	0.178571	0.119748	0.245798	0.041929	0.381551	0.607966	0.750524	0.995807	0.006289	0.24109	0.454927	0.731656	0.997904	0.002096	0.184486	0.494759	0.767296	1	0.624738	0.083857	0.291405	0.069328	0.073529	0.002101	0.002096	0.266247	0.471698	0.761006	1	0.102725	0.316562	0.559748	0.645702	0.972746	0.033543	0.238994	0.505241	0.752621	0.937107	0.33543	0.508403	0.008386	0.165618	0.473795	0.725367	0.993711	0.559748
0.338983	0.345763	0.315254	0.221088	0.183673	0.248299	0.020339	0.257627	0.518644	0.779661	1	0.00678	0.213559	0.481356	0.701695	0.99322	0.00339	0.267797	0.491525	0.732203	0.983051	0.386441	0.166102	0.447458	0.047619	0.108844	0	0.00339	0.189831	0.464407	0.701695	1	0.159322	0.311864	0.4	0.59661	0.684746	0.013559	0.257627	0.505085	0.80339	0.979661	0.535593	0.408163	0.023729	0.240678	0.454237	0.657627	0.983051	0.349153
0.325758	0.337121	0.337121	0.205323	0.235741	0.250951	0.007576	0.219697	0.454545	0.738636	0.981061	0.015152	0.268939	0.537879	0.772727	0.996212	0.003788	0.231061	0.511364	0.708333	1	0.367424	0.265152	0.367424	0.076046	0.076046	0.015209	0.003788	0.284091	0.473485	0.852273	1	0.060606	0.140152	0.587121	0.753788	0.94697	0.007576	0.227273	0.435606	0.69697	0.931818	0.55303	0.460076	0.003788	0.231061	0.522727	0.723485	0.984848	0.359848
0.414269	0.357883	0.227848	0.275346	0.15553	0.172811	0.009206	0.30725	0.591484	0.818182	0.998849	0.002301	0.216341	0.504028	0.735328	1	0.001151	0.207135	0.365938	0.555811	0.995397	0.513234	0.113924	0.372842	0.043779	0.085253	0.006912	0.001151	0.296893	0.573072	0.736479	1	0.04603	0.188723	0.322209	0.448792	0.904488	0.013809	0.247411	0.483314	0.777906	0.996548	0.410817	0.31106	0.011507	0.209436	0.38435	0.703107	0.995397	0.43038
0.313589	0.397213	0.289199	0.223776	0.178322	0.244755	0.038328	0.229965	0.41115	0.783972	1	0.006969	0.292683	0.526132	0.686411	0.993031	0.003484	0.191638	0.508711	0.790941	0.989547	0.606272	0.188153	0.205575	0.083916	0.048951	0	0.003484	0.355401	0.529617	0.679443	1	0.010453	0.170732	0.313589	0.853659	0.993031	0.101045	0.146341	0.348432	0.804878	0.937282	0.439024	0.405594	0.010453	0.212544	0.522648	0.763066	0.993031	0.390244
0.321168	0.364964	0.313869	0.241463	0.202439	0.253659	0.014599	0.238443	0.474453	0.749392	0.997567	0.004866	0.226277	0.513382	0.751825	1	0.002433	0.274939	0.493917	0.729927	0.995134	0.442822	0.36983	0.187348	0.097561	0.058537	0.019512	0.002433	0.265207	0.527981	0.778589	1	0.075426	0.3382	0.554745	0.742092	0.985401	0.004866	0.167883	0.304136	0.625304	0.849148	0.462287	0.380488	0.009732	0.277372	0.515815	0.759124	0.995134	0.403893
0.454545	0.222222	0.323232	0.244898	0.357143	0.081633	0.020202	0.252525	0.454545	0.727273	1	0.030303	0.333333	0.565657	0.666667	0.949495	0.010101	0.171717	0.383838	0.777778	0.979798	0.353535	0.272727	0.373737	0.081633	0.061224	0	0.010101	0.080808	0.434343	0.626263	1	0.10101	0.151515	0.525253	0.646465	0.717172	0.242424	0.323232	0.757576	0.848485	0.979798	0.484848	0.428571	0.050505	0.222222	0.555556	0.777778	0.979798	0.161616
0.398438	0.328125	0.273438	0.251969	0.220472	0.15748	0.023438	0.25	0.5	0.742188	0.976562	0.015625	0.28125	0.539062	0.796875	0.992188	0.007812	0.148438	0.335938	0.632812	1	0.3125	0.21875	0.46875	0.07874	0.062992	0.015748	0.007812	0.265625	0.421875	0.734375	1	0.03125	0.078125	0.382812	0.484375	0.71875	0.125	0.234375	0.648438	0.859375	0.976562	0.40625	0.362205	0.03125	0.179688	0.40625	0.609375	0.8125	0.375
0.425197	0.326772	0.248031	0.252964	0.209486	0.150198	0.007874	0.26378	0.507874	0.818898	1	0.023622	0.299213	0.551181	0.755906	0.996063	0.003937	0.177165	0.401575	0.574803	0.968504	0.472441	0.122047	0.405512	0.047431	0.079051	0.007905	0.003937	0.358268	0.673228	0.838583	1	0.047244	0.070866	0.42126	0.543307	0.582677	0.011811	0.204724	0.397638	0.649606	0.933071	0.385827	0.332016	0.035433	0.153543	0.34252	0.547244	0.968504	0.346457
0.329412	0.4	0.270588	0.22619	0.22619	0.22619	0.035294	0.294118	0.517647	0.682353	0.988235	0.023529	0.188235	0.435294	0.776471	0.976471	0.011765	0.164706	0.458824	0.670588	1	0.529412	0.258824	0.211765	0.142857	0.047619	0	0.011765	0.2	0.517647	0.788235	1	0.070588	0.552941	0.647059	0.764706	0.941176	0.141176	0.235294	0.294118	0.341176	0.4	0.447059	0.52381	0.058824	0.270588	0.6	0.776471	0.952941	0.329412
0.376923	0.269231	0.353846	0.185328	0.285714	0.204633	0.007692	0.219231	0.461538	0.715385	0.992308	0.015385	0.273077	0.526923	0.753846	1	0.003846	0.265385	0.511538	0.75	0.980769	0.25	0.065385	0.684615	0.019305	0.104247	0.011583	0.003846	0.284615	0.696154	0.823077	1	0.711538	0.753846	0.792308	0.807692	0.919231	0.015385	0.207692	0.411538	0.603846	0.984615	0.492308	0.416988	0.011538	0.253846	0.488462	0.734615	0.965385	0.273077
0.389831	0.336158	0.274011	0.271955	0.229462	0.164306	0.016949	0.248588	0.471751	0.737288	1	0.00565	0.279661	0.550847	0.779661	0.997175	0.002825	0.206215	0.463277	0.683616	0.99435	0.562147	0.163842	0.274011	0.062323	0.056657	0.005666	0.002825	0.30791	0.528249	0.816384	1	0.090395	0.149718	0.542373	0.70339	0.799435	0.016949	0.234463	0.347458	0.728814	0.867232	0.412429	0.373938	0.025424	0.228814	0.432203	0.686441	0.988701	0.384181
0.315789	0.368421	0.315789	0.166667	0.204545	0.212121	0.015038	0.225564	0.503759	0.789474	1	0.022556	0.285714	0.473684	0.729323	0.992481	0.007519	0.210526	0.511278	0.699248	0.984962	0.368421	0.240602	0.390977	0.068182	0.083333	0.007576	0.007519	0.270677	0.451128	0.87218	1	0.052632	0.293233	0.390977	0.488722	0.714286	0.142857	0.233083	0.601504	0.789474	0.962406	0.413534	0.393939	0.030075	0.18797	0.413534	0.616541	0.857143	0.360902
0.349359	0.416667	0.233974	0.292135	0.144462	0.224719	0.004808	0.248397	0.49359	0.703526	0.995192	0.003205	0.233974	0.509615	0.759615	0.996795	0.001603	0.258013	0.490385	0.764423	1	0.612179	0.116987	0.270833	0.048154	0.057785	0	0.001603	0.232372	0.496795	0.735577	1	0.041667	0.262821	0.418269	0.589744	0.940705	0.016026	0.302885	0.525641	0.793269	0.985577	0.392628	0.382022	0.014423	0.270833	0.554487	0.783654	0.99359	0.405449
0.388158	0.302632	0.309211	0.225166	0.284768	0.211921	0.013158	0.269737	0.447368	0.717105	1	0.039474	0.217105	0.519737	0.710526	0.967105	0.006579	0.223684	0.513158	0.789474	0.986842	0.375	0.296053	0.328947	0.119205	0.05298	0.013245	0.006579	0.197368	0.559211	0.743421	1	0.013158	0.184211	0.631579	0.881579	0.980263	0.157895	0.296053	0.381579	0.460526	0.809211	0.401316	0.503311	0.019737	0.197368	0.513158	0.723684	0.986842	0.263158
0.313576	0.414914	0.271511	0.247126	0.166667	0.222222	0.007648	0.258126	0.48566	0.739962	0.99044	0.003824	0.225621	0.491396	0.764818	1	0.001912	0.263862	0.527725	0.726577	0.998088	0.669216	0.152964	0.17782	0.061303	0.05364	0	0.001912	0.246654	0.535373	0.808795	1	0.00956	0.208413	0.374761	0.608031	0.996176	0.128107	0.342256	0.483748	0.694073	0.982792	0.479924	0.321839	0.005736	0.3174	0.602294	0.814532	0.998088	0.409178
0.459854	0.29781	0.242336	0.247076	0.192982	0.168129	0.00292	0.265693	0.49635	0.770803	1	0.005839	0.251095	0.50219	0.728467	0.99708	0.00146	0.227737	0.490511	0.713869	0.986861	0.477372	0.191241	0.331387	0.068713	0.065789	0.004386	0.00146	0.205839	0.437956	0.716788	1	0.039416	0.256934	0.465693	0.681752	0.932847	0.056934	0.331387	0.629197	0.835036	0.99562	0.410219	0.330409	0.014599	0.258394	0.464234	0.684672	0.986861	0.359124
0.299383	0.373457	0.32716	0.198142	0.198142	0.250774	0.006173	0.225309	0.518519	0.777778	0.990741	0.009259	0.259259	0.478395	0.712963	1	0.003086	0.231481	0.503086	0.75	0.993827	0.567901	0.197531	0.234568	0.086687	0.06192	0.012384	0.003086	0.287037	0.490741	0.759259	1	0.070988	0.268519	0.432099	0.567901	0.944444	0.021605	0.185185	0.62037	0.737654	0.885802	0.617284	0.315789	0.012346	0.253086	0.512346	0.731481	0.993827	0.376543
0.418367	0.340136	0.241497	0.279863	0.221843	0.177474	0.013605	0.248299	0.527211	0.772109	1	0.006803	0.261905	0.486395	0.714286	0.982993	0.003401	0.207483	0.455782	0.738095	0.962585	0.612245	0.20068	0.187075	0.081911	0.054608	0.006826	0.003401	0.261905	0.496599	0.663265	1	0.020408	0.285714	0.639456	0.812925	0.931973	0.013605	0.183673	0.336735	0.843537	0.986395	0.346939	0.327645	0.027211	0.241497	0.557823	0.758503	0.962585	0.380952
0.295345	0.382825	0.32183	0.211245	0.200803	0.235341	0.002408	0.271268	0.540931	0.761637	1	0.00321	0.213483	0.446228	0.716693	0.999197	0.000803	0.29053	0.520867	0.764045	0.997592	0.475923	0.108347	0.41573	0.04257	0.079518	0.004016	0.000803	0.158909	0.385233	0.684591	1	0.004815	0.307384	0.509631	0.697432	0.869984	0.024077	0.373997	0.616372	0.843499	0.998395	0.521669	0.380723	0.005618	0.284109	0.516854	0.748796	0.998395	0.403692
0.335893	0.414587	0.24952	0.298077	0.157692	0.221154	0.005758	0.295585	0.604607	0.827255	1	0.003839	0.232246	0.445298	0.731286	0.990403	0.001919	0.224568	0.454894	0.62572	0.998081	0.485605	0.049904	0.464491	0.026923	0.084615	0.003846	0.001919	0.222649	0.583493	0.848369	1	0.101727	0.111324	0.245681	0.602687	0.857965	0.015355	0.318618	0.477927	0.65643	0.953935	0.456814	0.342308	0.011516	0.245681	0.443378	0.612284	0.996161	0.397313
0.396667	0.256667	0.346667	0.207358	0.230769	0.19398	0.01	0.276667	0.493333	0.74	1	0.016667	0.193333	0.476667	0.75	0.986667	0.003333	0.266667	0.5	0.76	0.993333	0.403333	0.25	0.346667	0.073579	0.053512	0	0.003333	0.203333	0.483333	0.7	1	0.02	0.18	0.5	0.77	0.933333	0.06	0.336667	0.536667	0.68	0.976667	0.556667	0.354515	0.016667	0.21	0.466667	0.71	0.986667	0.253333
0.466501	0.305211	0.228288	0.281095	0.199005	0.146766	0.007444	0.2134	0.454094	0.751861	1	0.004963	0.260546	0.545906	0.82134	0.985112	0.002481	0.317618	0.496278	0.669975	0.997519	0.511166	0.233251	0.255583	0.089552	0.064677	0	0.002481	0.26799	0.538462	0.784119	1	0.151365	0.377171	0.468983	0.702233	0.997519	0.007444	0.131514	0.48139	0.734491	0.980149	0.37469	0.363184	0.012407	0.337469	0.513648	0.744417	0.997519	0.369727
0.339928	0.348921	0.311151	0.236036	0.236036	0.185586	0.008993	0.206835	0.458633	0.735612	0.98741	0.007194	0.269784	0.501799	0.767986	0.998201	0.001799	0.242806	0.516187	0.733813	1	0.381295	0.07554	0.543165	0.030631	0.113514	0.001802	0.001799	0.278777	0.561151	0.834532	1	0.214029	0.273381	0.420863	0.476619	0.744604	0.003597	0.194245	0.494604	0.715827	0.989209	0.56295	0.410811	0.005396	0.285971	0.505396	0.77518	0.996403	0.372302
0.394737	0.328947	0.276316	0.246696	0.202643	0.180617	0.013158	0.236842	0.464912	0.723684	0.986842	0.008772	0.25	0.513158	0.785088	1	0.004386	0.201754	0.473684	0.666667	0.995614	0.324561	0.118421	0.557018	0.044053	0.096916	0	0.004386	0.135965	0.539474	0.745614	1	0.013158	0.399123	0.780702	0.842105	0.881579	0.04386	0.267544	0.460526	0.618421	0.97807	0.504386	0.334802	0.008772	0.20614	0.469298	0.671053	0.991228	0.320175
0.485537	0.245868	0.268595	0.244306	0.26501	0.140787	0.004132	0.254132	0.508264	0.716942	0.989669	0.006198	0.27686	0.553719	0.809917	0.993802	0.002066	0.188017	0.433884	0.752066	1	0.504132	0.128099	0.367769	0.060041	0.076605	0.00207	0.002066	0.402893	0.628099	0.807851	1	0.012397	0.105372	0.328512	0.433884	0.882231	0.008264	0.216942	0.382231	0.652893	0.985537	0.365702	0.430642	0.008264	0.192149	0.392562	0.727273	0.971074	0.297521
0.448485	0.369697	0.181818	0.317073	0.189024	0.121951	0.024242	0.242424	0.509091	0.775758	1	0.012121	0.163636	0.381818	0.727273	0.981818	0.006061	0.406061	0.557576	0.69697	0.884848	0.575758	0.151515	0.272727	0.054878	0.054878	0.030488	0.006061	0.139394	0.30303	0.624242	1	0.242424	0.4	0.606061	0.666667	0.860606	0.406061	0.466667	0.775758	0.866667	0.939394	0.436364	0.390244	0.078788	0.278788	0.466667	0.69697	0.933333	0.430303
0.414938	0.244813	0.340249	0.18711	0.288981	0.191268	0.006224	0.248963	0.497925	0.763485	1	0.008299	0.215768	0.473029	0.690871	0.987552	0.002075	0.26556	0.526971	0.761411	0.993776	0.292531	0.226141	0.481328	0.064449	0.081081	0.002079	0.002075	0.182573	0.495851	0.686722	1	0.093361	0.290456	0.385892	0.558091	0.995851	0.006224	0.242739	0.653527	0.821577	0.966805	0.481328	0.428274	0.010373	0.282158	0.504149	0.732365	0.993776	0.288382
0.389423	0.331731	0.278846	0.193237	0.231884	0.188406	0.009615	0.216346	0.403846	0.697115	0.995192	0.024038	0.192308	0.538462	0.788462	1	0.004808	0.3125	0.509615	0.735577	0.990385	0.490385	0.158654	0.350962	0.067633	0.10628	0.028986	0.004808	0.153846	0.524038	0.75	1	0.221154	0.293269	0.615385	0.740385	0.980769	0.043269	0.326923	0.427885	0.725962	0.947115	0.485577	0.415459	0.024038	0.341346	0.504808	0.730769	0.980769	0.307692
0.323432	0.369637	0.306931	0.198347	0.178512	0.213223	0.00495	0.171617	0.39934	0.689769	0.990099	0.024752	0.339934	0.544554	0.825083	1	0.00165	0.252475	0.521452	0.727723	0.9967	0.580858	0.189769	0.229373	0.07438	0.041322	0.004959	0.00165	0.290429	0.478548	0.778878	1	0.059406	0.234323	0.524752	0.706271	0.966997	0.014851	0.19637	0.556106	0.744224	0.9967	0.5	0.390083	0.049505	0.280528	0.521452	0.762376	0.99505	0.412541
0.347826	0.365217	0.286957	0.307018	0.201754	0.210526	0.043478	0.217391	0.495652	0.747826	0.982609	0.017391	0.191304	0.469565	0.756522	1	0.008696	0.278261	0.504348	0.66087	0.991304	0.504348	0.234783	0.26087	0.096491	0.061404	0.008772	0.008696	0.121739	0.434783	0.773913	1	0.391304	0.6	0.66087	0.843478	0.947826	0.173913	0.226087	0.347826	0.521739	0.965217	0.330435	0.368421	0.130435	0.278261	0.530435	0.66087	0.965217	0.373913
0.395876	0.347423	0.256701	0.251806	0.201238	0.169247	0.006186	0.253608	0.543299	0.760825	1	0.002062	0.337113	0.527835	0.769072	0.997938	0.001031	0.160825	0.375258	0.690722	0.996907	0.687629	0.073196	0.239175	0.037152	0.068111	0.004128	0.001031	0.34433	0.556701	0.754639	1	0.027835	0.174227	0.290722	0.724742	0.981443	0.005155	0.084536	0.247423	0.735052	0.997938	0.374227	0.352941	0.003093	0.157732	0.378351	0.672165	0.996907	0.375258
0.295082	0.327869	0.377049	0.197802	0.258242	0.274725	0.016393	0.245902	0.47541	0.73224	1	0.038251	0.196721	0.469945	0.704918	0.983607	0.005464	0.273224	0.513661	0.786885	0.994536	0.409836	0.480874	0.10929	0.142857	0.032967	0	0.005464	0.213115	0.535519	0.825137	1	0.016393	0.349727	0.530055	0.721311	0.994536	0.092896	0.114754	0.256831	0.284153	0.759563	0.453552	0.494505	0.021858	0.26776	0.497268	0.748634	0.994536	0.387978
0.329624	0.354659	0.315716	0.220056	0.21727	0.233983	0.006954	0.305981	0.567455	0.802503	0.998609	0.002782	0.196106	0.450626	0.714882	0.995828	0.001391	0.225313	0.50904	0.727399	1	0.426982	0.109875	0.463143	0.050139	0.091922	0.005571	0.001391	0.242003	0.421419	0.659249	1	0.082058	0.214186	0.446453	0.535466	0.795549	0.019471	0.260083	0.61057	0.838665	0.987483	0.49235	0.426184	0.005563	0.261474	0.489569	0.668985	0.993046	0.392211
0.344643	0.403571	0.251786	0.26297	0.168157	0.187835	0.005357	0.276786	0.457143	0.721429	1	0.003571	0.219643	0.508929	0.767857	0.998214	0.001786	0.298214	0.516071	0.744643	0.991071	0.551786	0.164286	0.283929	0.069767	0.069767	0.0161	0.001786	0.216071	0.423214	0.705357	1	0.132143	0.194643	0.475	0.798214	0.951786	0.005357	0.417857	0.521429	0.735714	0.994643	0.451786	0.368515	0.025	0.296429	0.542857	0.771429	0.991071	0.403571
0.401639	0.229508	0.368852	0.165289	0.272727	0.247934	0.02459	0.229508	0.491803	0.737705	1	0.040984	0.270492	0.47541	0.754098	0.991803	0.008197	0.254098	0.459016	0.704918	0.983607	0.418033	0.286885	0.295082	0.140496	0.057851	0.008264	0.008197	0.286885	0.680328	0.819672	1	0.016393	0.204918	0.319672	0.696721	0.95082	0.090164	0.155738	0.532787	0.606557	0.909836	0.442623	0.46281	0.016393	0.262295	0.442623	0.680328	0.983607	0.237705
0.465714	0.35	0.184286	0.267525	0.164521	0.127325	0.002857	0.212857	0.492857	0.775714	0.998571	0.004286	0.234286	0.401429	0.664286	0.994286	0.001429	0.458571	0.604286	0.772857	1	0.607143	0.1	0.292857	0.041488	0.038627	0.001431	0.001429	0.178571	0.335714	0.607143	1	0.134286	0.468571	0.53	0.601429	0.96	0.024286	0.561429	0.734286	0.807143	0.881429	0.438571	0.309013	0.021429	0.351429	0.54	0.771429	0.994286	0.372857
0.460208	0.256055	0.283737	0.232639	0.263889	0.135417	0.010381	0.238754	0.449827	0.754325	1	0.00692	0.15917	0.463668	0.6609	0.989619	0.00346	0.352941	0.557093	0.761246	0.99308	0.487889	0.16609	0.346021	0.059028	0.052083	0.003472	0.00346	0.145329	0.384083	0.681661	1	0.072664	0.432526	0.581315	0.847751	0.892734	0.148789	0.304498	0.515571	0.757785	0.965398	0.408304	0.361111	0.069204	0.394464	0.570934	0.775087	0.965398	0.301038
0.345133	0.300885	0.353982	0.179601	0.241685	0.217295	0.004425	0.280973	0.539823	0.785398	0.995575	0.006637	0.227876	0.480088	0.761062	1	0.002212	0.232301	0.475664	0.696903	0.986726	0.35177	0.159292	0.488938	0.050998	0.086475	0.011086	0.002212	0.232301	0.480088	0.719027	1	0.097345	0.285398	0.460177	0.663717	0.774336	0.013274	0.221239	0.526549	0.814159	0.980088	0.550885	0.385809	0.00885	0.212389	0.422566	0.690265	0.986726	0.311947
0.30465	0.367106	0.328244	0.221528	0.210417	0.239583	0.004164	0.278279	0.51839	0.740458	0.99653	0.001388	0.235947	0.496183	0.745316	0.999306	0.000694	0.240805	0.477446	0.754337	1	0.528105	0.376128	0.095767	0.117361	0.034028	0.004861	0.000694	0.258848	0.509368	0.725191	1	0.002082	0.226232	0.475364	0.754337	0.936155	0.00347	0.279667	0.528105	0.957668	0.998612	0.598196	0.313889	0.002082	0.240805	0.490632	0.761971	0.997918	0.392783
0.341176	0.382353	0.276471	0.248521	0.236686	0.218935	0.023529	0.276471	0.582353	0.841176	0.994118	0.011765	0.170588	0.441176	0.705882	1	0.005882	0.205882	0.411765	0.7	0.970588	0.376471	0.170588	0.452941	0.059172	0.08284	0	0.005882	0.141176	0.364706	0.582353	1	0.023529	0.058824	0.335294	0.4	0.805882	0.135294	0.441176	0.688235	0.852941	0.988235	0.417647	0.508876	0.029412	0.229412	0.441176	0.717647	0.970588	0.417647
0.358621	0.468966	0.172414	0.347222	0.083333	0.166667	0.027586	0.296552	0.448276	0.668966	0.972414	0.013793	0.248276	0.510345	0.82069	0.986207	0.006897	0.227586	0.524138	0.772414	1	0.717241	0.131034	0.151724	0.048611	0.048611	0.006944	0.006897	0.268966	0.448276	0.8	1	0.068966	0.089655	0.234483	0.537931	0.855172	0.151724	0.558621	0.682759	0.717241	0.758621	0.289655	0.25	0.062069	0.241379	0.565517	0.834483	0.958621	0.462069
0.419492	0.266949	0.313559	0.242553	0.225532	0.178723	0.008475	0.228814	0.504237	0.745763	0.995763	0.072034	0.245763	0.495763	0.771186	1	0.004237	0.237288	0.466102	0.720339	0.970339	0.34322	0.09322	0.563559	0.025532	0.093617	0	0.004237	0.169492	0.474576	0.758475	1	0.444915	0.779661	0.834746	0.855932	0.881356	0.012712	0.233051	0.411017	0.648305	0.978814	0.512712	0.374468	0.025424	0.233051	0.444915	0.644068	0.970339	0.271186
0.337766	0.329787	0.332447	0.205333	0.237333	0.24	0.029255	0.281915	0.518617	0.781915	0.989362	0.013298	0.207447	0.444149	0.702128	1	0.00266	0.242021	0.494681	0.742021	0.99734	0.281915	0.101064	0.617021	0.042667	0.117333	0.005333	0.00266	0.183511	0.329787	0.632979	1	0.045213	0.109043	0.196809	0.244681	0.367021	0.007979	0.417553	0.617021	0.81383	0.99734	0.606383	0.421333	0.005319	0.25	0.470745	0.736702	0.99734	0.353723
0.302817	0.341549	0.355634	0.201413	0.215548	0.275618	0.017606	0.285211	0.507042	0.778169	0.996479	0.007042	0.228873	0.475352	0.711268	1	0.003521	0.232394	0.485915	0.725352	0.992958	0.415493	0.151408	0.433099	0.042403	0.091873	0	0.003521	0.179577	0.419014	0.690141	1	0.193662	0.285211	0.605634	0.644366	0.728873	0.045775	0.253521	0.528169	0.830986	0.992958	0.556338	0.424028	0.010563	0.235915	0.475352	0.679577	0.985915	0.352113
0.376623	0.313853	0.309524	0.262473	0.225597	0.193059	0.006494	0.218615	0.495671	0.761905	1	0.008658	0.268398	0.512987	0.746753	0.991342	0.002165	0.253247	0.469697	0.727273	0.995671	0.493506	0.188312	0.318182	0.086768	0.065076	0.004338	0.002165	0.192641	0.536797	0.785714	1	0.012987	0.077922	0.474026	0.850649	0.97619	0.207792	0.311688	0.448052	0.701299	0.989177	0.489177	0.368764	0.008658	0.322511	0.465368	0.735931	0.991342	0.322511
0.278351	0.378007	0.343643	0.224138	0.182759	0.244828	0.006873	0.250859	0.487973	0.766323	0.993127	0.017182	0.223368	0.477663	0.731959	0.996564	0.003436	0.257732	0.525773	0.745704	1	0.398625	0.168385	0.43299	0.048276	0.096552	0	0.003436	0.182131	0.429553	0.701031	1	0.202749	0.357388	0.443299	0.635739	0.725086	0.054983	0.257732	0.536082	0.821306	0.986254	0.532646	0.406897	0.041237	0.278351	0.484536	0.683849	0.982818	0.381443
0.313152	0.402923	0.283925	0.225941	0.202929	0.225941	0.010438	0.367432	0.551148	0.755741	1	0.004175	0.177453	0.394572	0.720251	0.997912	0.002088	0.302714	0.51357	0.762004	0.991649	0.60334	0.14405	0.25261	0.054393	0.054393	0	0.002088	0.254697	0.507307	0.764092	1	0.068894	0.411273	0.584551	0.843424	0.983299	0.010438	0.179541	0.425887	0.638831	0.956159	0.511482	0.292887	0.008351	0.160752	0.384134	0.659708	0.987474	0.413361
0.4	0.372222	0.227778	0.27933	0.206704	0.167598	0.011111	0.211111	0.455556	0.705556	1	0.05	0.261111	0.444444	0.755556	0.988889	0.005556	0.377778	0.577778	0.738889	0.961111	0.561111	0.166667	0.272222	0.061453	0.061453	0.01676	0.005556	0.216667	0.361111	0.522222	1	0.094444	0.533333	0.744444	0.8	0.933333	0.016667	0.444444	0.65	0.866667	0.988889	0.361111	0.379888	0.033333	0.338889	0.466667	0.727778	0.933333	0.377778
0.355556	0.288889	0.355556	0.235955	0.292135	0.235955	0.077778	0.311111	0.566667	0.833333	1	0.022222	0.233333	0.455556	0.666667	0.933333	0.011111	0.177778	0.4	0.711111	0.977778	0.388889	0.466667	0.144444	0.101124	0.05618	0.011236	0.011111	0.088889	0.444444	0.866667	1	0.222222	0.355556	0.533333	0.666667	0.833333	0.1	0.122222	0.155556	0.766667	0.955556	0.444444	0.292135	0.088889	0.344444	0.477778	0.733333	0.955556	0.311111
0.411215	0.299065	0.28972	0.320755	0.283019	0.150943	0.046729	0.280374	0.514019	0.738318	0.981308	0.018692	0.233645	0.429907	0.728972	0.953271	0.009346	0.205607	0.504673	0.757009	1	0.504673	0.252336	0.242991	0.113208	0.056604	0	0.009346	0.121495	0.439252	0.794393	1	0.373832	0.420561	0.663551	0.859813	0.971963	0.168224	0.271028	0.336449	0.514019	0.579439	0.364486	0.415094	0.037383	0.242991	0.420561	0.654206	0.971963	0.280374
0.432161	0.316583	0.251256	0.257576	0.212121	0.19697	0.01005	0.261307	0.542714	0.809045	1	0.055276	0.246231	0.462312	0.723618	0.98995	0.005025	0.18593	0.447236	0.633166	0.964824	0.386935	0.236181	0.376884	0.10101	0.070707	0.010101	0.005025	0.170854	0.557789	0.834171	1	0.01005	0.180905	0.457286	0.658291	0.733668	0.045226	0.266332	0.361809	0.773869	0.959799	0.351759	0.414141	0.015075	0.19598	0.467337	0.658291	0.964824	0.321608
0.382609	0.365217	0.252174	0.27193	0.219298	0.105263	0.017391	0.234783	0.426087	0.695652	0.973913	0.113043	0.382609	0.652174	0.852174	1	0.008696	0.104348	0.356522	0.6	0.913043	0.443478	0.478261	0.078261	0.175439	0.017544	0	0.008696	0.165217	0.452174	0.678261	1	0.069565	0.217391	0.382609	0.695652	0.878261	0.913043	0.921739	0.93913	0.956522	0.982609	0.443478	0.333333	0.026087	0.226087	0.495652	0.626087	0.965217	0.408696
0.34589	0.400685	0.253425	0.254296	0.164948	0.185567	0.013699	0.25	0.417808	0.712329	0.993151	0.006849	0.273973	0.571918	0.777397	0.996575	0.003425	0.208904	0.523973	0.763699	1	0.59589	0.325342	0.078767	0.140893	0.024055	0.003436	0.003425	0.236301	0.462329	0.722603	1	0.034247	0.369863	0.530822	0.80137	0.986301	0.174658	0.188356	0.208904	0.732877	0.760274	0.489726	0.343643	0.010274	0.202055	0.486301	0.756849	0.989726	0.44863
0.337838	0.351351	0.310811	0.236806	0.215156	0.2341	0.008108	0.27973	0.521622	0.75	0.997297	0.002703	0.214865	0.468919	0.739189	0.998649	0.001351	0.262162	0.497297	0.754054	1	0.497297	0.164865	0.337838	0.069012	0.071719	0.006766	0.001351	0.217568	0.387838	0.718919	1	0.056757	0.262162	0.491892	0.693243	0.997297	0.005405	0.402703	0.571622	0.841892	0.985135	0.524324	0.359946	0.005405	0.222973	0.471622	0.744595	0.995946	0.378378
0.28551	0.392577	0.321913	0.234286	0.175714	0.248571	0.001428	0.290507	0.508922	0.758744	0.996431	0.002855	0.231263	0.473947	0.73733	0.999286	0.000714	0.243398	0.517488	0.750178	1	0.539615	0.373305	0.087081	0.117143	0.027143	0.004286	0.000714	0.24768	0.484654	0.721627	1	0.002141	0.227695	0.492505	0.744468	0.93576	0.033547	0.321199	0.660956	0.958601	0.995004	0.610992	0.29	0.002141	0.255532	0.523911	0.753747	0.998572	0.427552
0.43662	0.309859	0.253521	0.185714	0.257143	0.185714	0.028169	0.28169	0.492958	0.859155	1	0.084507	0.15493	0.535211	0.647887	0.915493	0.014085	0.197183	0.450704	0.56338	0.901408	0.478873	0.338028	0.183099	0.142857	0.028571	0	0.014085	0.112676	0.422535	0.633803	1	0.140845	0.211268	0.352113	0.492958	0.71831	0.788732	0.816901	0.859155	0.901408	0.957746	0.408451	0.428571	0.070423	0.239437	0.507042	0.619718	0.901408	0.338028
0.353952	0.358534	0.287514	0.248853	0.209862	0.207569	0.002291	0.271478	0.500573	0.735395	0.998855	0.005727	0.213058	0.429553	0.722795	0.996564	0.001145	0.280641	0.533792	0.778923	1	0.568156	0.106529	0.325315	0.040138	0.108945	0.008028	0.001145	0.186712	0.457045	0.739977	1	0.17984	0.616266	0.73425	0.799542	0.981672	0.005727	0.30126	0.467354	0.680412	0.973654	0.568156	0.383028	0.004582	0.183276	0.453608	0.737686	0.981672	0.363116
0.359801	0.26799	0.372208	0.190062	0.277019	0.224845	0.006203	0.248139	0.522333	0.751861	0.998759	0.004963	0.258065	0.486352	0.734491	0.980149	0.001241	0.241935	0.495037	0.754342	1	0.48139	0.222084	0.296526	0.095652	0.055901	0.003727	0.001241	0.210918	0.451613	0.736973	1	0.040943	0.183623	0.426799	0.800248	0.997519	0.006203	0.332506	0.554591	0.7134	0.991315	0.57072	0.404969	0.003722	0.244417	0.478908	0.743176	0.997519	0.290323
0.341463	0.429268	0.229268	0.303922	0.151961	0.215686	0.029268	0.2	0.560976	0.795122	1	0.009756	0.282927	0.439024	0.717073	0.985366	0.004878	0.214634	0.497561	0.668293	0.980488	0.521951	0.121951	0.356098	0.058824	0.088235	0	0.004878	0.253659	0.55122	0.814634	1	0.165854	0.190244	0.239024	0.297561	0.629268	0.058537	0.336585	0.463415	0.702439	0.878049	0.556098	0.382353	0.019512	0.24878	0.439024	0.614634	0.965854	0.443902
0.384516	0.27871	0.336774	0.222222	0.276486	0.189922	0.002581	0.267097	0.509677	0.752258	0.99871	0.005161	0.23871	0.487742	0.736774	1	0.00129	0.224516	0.494194	0.747097	0.997419	0.443871	0.255484	0.300645	0.104651	0.05814	0.003876	0.00129	0.207742	0.450323	0.734194	1	0.04129	0.206452	0.492903	0.809032	0.997419	0.006452	0.317419	0.543226	0.708387	0.990968	0.574194	0.408269	0.003871	0.258065	0.477419	0.745806	0.997419	0.287742
0.344985	0.369301	0.285714	0.270928	0.191781	0.191781	0.004559	0.232523	0.466565	0.740122	0.99696	0.007599	0.217325	0.515198	0.756839	0.99848	0.00152	0.288754	0.510638	0.727964	1	0.489362	0.133739	0.3769	0.039574	0.073059	0.009132	0.00152	0.158055	0.474164	0.787234	1	0.004559	0.303951	0.484802	0.600304	0.75228	0.010638	0.325228	0.566869	0.772036	0.908815	0.50304	0.374429	0.00304	0.276596	0.486322	0.712766	0.993921	0.395137
0.356757	0.308108	0.335135	0.173913	0.255435	0.271739	0.016216	0.27027	0.524324	0.735135	1	0.010811	0.151351	0.394595	0.718919	0.983784	0.005405	0.254054	0.497297	0.745946	0.967568	0.427027	0.194595	0.378378	0.086957	0.097826	0	0.005405	0.351351	0.594595	0.772973	1	0.183784	0.227027	0.491892	0.718919	0.967568	0.021622	0.113514	0.335135	0.605405	0.945946	0.508108	0.478261	0.016216	0.248649	0.518919	0.740541	0.967568	0.318919
0.356265	0.298526	0.345209	0.204182	0.254613	0.236162	0.002457	0.283784	0.540541	0.760442	1	0.004914	0.237101	0.455774	0.732187	0.995086	0.001229	0.22973	0.495086	0.735872	0.997543	0.465602	0.248157	0.286241	0.098401	0.059041	0.00246	0.001229	0.210074	0.469287	0.749386	1	0.038084	0.202703	0.423833	0.793612	0.997543	0.006143	0.318182	0.556511	0.707617	0.9914	0.563882	0.398524	0.003686	0.271499	0.484029	0.743243	0.997543	0.332924
0.333333	0.312684	0.353982	0.213018	0.236686	0.224852	0.00885	0.250737	0.533923	0.781711	0.99705	0.0059	0.185841	0.386431	0.646018	0.99115	0.00295	0.300885	0.501475	0.761062	1	0.39233	0.19469	0.412979	0.065089	0.076923	0	0.00295	0.218289	0.427729	0.654867	1	0.156342	0.286136	0.489676	0.79941	0.952802	0.011799	0.215339	0.536873	0.831858	0.99115	0.542773	0.343195	0.00885	0.256637	0.486726	0.731563	0.9941	0.330383
0.41339	0.331562	0.255048	0.253191	0.21383	0.161702	0.002125	0.255048	0.518597	0.760893	1	0.003188	0.217853	0.520723	0.749203	0.98831	0.001063	0.274176	0.463337	0.662062	0.997875	0.472901	0.077577	0.449522	0.034043	0.085106	0.008511	0.001063	0.157279	0.642933	0.77577	1	0.035069	0.223167	0.409139	0.81509	0.954304	0.003188	0.277365	0.461211	0.603613	0.996812	0.416578	0.33617	0.007439	0.274176	0.463337	0.636557	0.996812	0.35813
0.354118	0.335294	0.310588	0.244994	0.208481	0.207303	0.005882	0.277647	0.550588	0.762353	1	0.007059	0.214118	0.46	0.712941	0.998824	0.001176	0.263529	0.489412	0.754118	0.997647	0.418824	0.150588	0.430588	0.058893	0.08245	0.009423	0.001176	0.211765	0.511765	0.730588	1	0.002353	0.169412	0.365882	0.578824	0.985882	0.021176	0.329412	0.56	0.814118	0.997647	0.503529	0.414605	0.003529	0.229412	0.465882	0.695294	0.997647	0.335294
0.35284	0.337349	0.309811	0.237931	0.203448	0.218966	0.008606	0.32358	0.537005	0.753873	0.998279	0.006885	0.199656	0.500861	0.777969	1	0.001721	0.239243	0.432014	0.703959	0.996558	0.447504	0.170396	0.3821	0.067241	0.081034	0.005172	0.001721	0.173838	0.435456	0.784854	1	0.012048	0.211704	0.493976	0.738382	0.907057	0.089501	0.313253	0.526678	0.714286	0.958692	0.564544	0.324138	0.005164	0.246127	0.487091	0.707401	0.958692	0.380379
0.304553	0.414443	0.281005	0.215409	0.168239	0.254717	0.006279	0.194662	0.4427	0.816327	0.99529	0.00314	0.262166	0.511774	0.682889	1	0.00157	0.260597	0.510204	0.77865	0.99686	0.637363	0.139717	0.22292	0.06761	0.064465	0.001572	0.00157	0.21978	0.527473	0.693878	1	0.100471	0.277865	0.425432	0.850863	0.981162	0.023548	0.232339	0.44898	0.77865	0.956044	0.544741	0.279874	0.015699	0.362637	0.583987	0.728414	0.99686	0.437991
0.302158	0.316547	0.381295	0.181159	0.217391	0.23913	0.014388	0.230216	0.402878	0.647482	1	0.064748	0.215827	0.52518	0.719424	0.971223	0.007194	0.273381	0.546763	0.776978	0.985612	0.338129	0.323741	0.338129	0.115942	0.057971	0	0.007194	0.244604	0.482014	0.669065	1	0.028777	0.100719	0.208633	0.553957	0.697842	0.309353	0.381295	0.755396	0.899281	0.985612	0.553957	0.434783	0.035971	0.273381	0.568345	0.726619	0.985612	0.280576
0.478972	0.292056	0.228972	0.250585	0.208431	0.140515	0.004673	0.189252	0.462617	0.768692	0.997664	0.007009	0.271028	0.514019	0.754673	1	0.002336	0.324766	0.518692	0.670561	0.995327	0.446262	0.044393	0.509346	0.023419	0.084309	0.004684	0.002336	0.175234	0.352804	0.764019	1	0.018692	0.093458	0.376168	0.983645	0.995327	0.044393	0.385514	0.542056	0.698598	0.922897	0.317757	0.388759	0.018692	0.287383	0.504673	0.623832	0.995327	0.366822
0.329915	0.355556	0.31453	0.202055	0.205479	0.241438	0.006838	0.232479	0.480342	0.781197	0.998291	0.003419	0.241026	0.51453	0.77265	1	0.001709	0.261538	0.495726	0.692308	0.993162	0.512821	0.124786	0.362393	0.053082	0.070205	0.001712	0.001709	0.230769	0.512821	0.782906	1	0.011966	0.191453	0.430769	0.564103	0.994872	0.044444	0.324786	0.494017	0.688889	0.964103	0.495726	0.335616	0.005128	0.254701	0.528205	0.709402	0.993162	0.384615
0.36	0.384	0.256	0.289157	0.172691	0.232932	0.028	0.292	0.56	0.832	1	0.008	0.232	0.504	0.772	0.996	0.004	0.22	0.42	0.644	0.904	0.448	0.312	0.24	0.096386	0.088353	0.008032	0.004	0.216	0.548	0.756	1	0.084	0.308	0.428	0.58	0.78	0.024	0.26	0.616	0.868	0.992	0.408	0.433735	0.016	0.196	0.416	0.608	0.904	0.416
0.30084	0.431933	0.267227	0.208754	0.171717	0.239057	0.003361	0.193277	0.411765	0.69916	0.991597	0.005042	0.315966	0.584874	0.828571	0.998319	0.001681	0.231933	0.445378	0.721008	1	0.531092	0.2	0.268908	0.089226	0.055556	0.001684	0.001681	0.242017	0.559664	0.709244	1	0.05042	0.215126	0.388235	0.630252	0.986555	0.028571	0.321008	0.52437	0.852101	0.963025	0.563025	0.350168	0.018487	0.305882	0.584874	0.764706	0.993277	0.411765
0.3125	0.375	0.3125	0.264151	0.201258	0.220126	0.0375	0.21875	0.41875	0.675	0.95625	0.05	0.28125	0.525	0.775	1	0.00625	0.1875	0.5	0.725	0.975	0.35625	0.29375	0.35	0.125786	0.062893	0.012579	0.00625	0.14375	0.5375	0.7375	1	0.0125	0.225	0.56875	0.8125	0.90625	0.05625	0.30625	0.39375	0.6125	0.95	0.375	0.465409	0.01875	0.19375	0.49375	0.7125	0.98125	0.375
0.402571	0.329499	0.26793	0.232905	0.182126	0.181449	0.003383	0.274019	0.560893	0.81935	1	0.002706	0.284844	0.521651	0.759134	0.999323	0.000677	0.185386	0.384303	0.594723	0.983085	0.441137	0.02977	0.529093	0.010833	0.102911	0.005416	0.000677	0.34912	0.728687	0.854533	1	0.021651	0.093369	0.432341	0.520298	0.650203	0.003383	0.227334	0.402571	0.613667	0.99797	0.412043	0.291131	0.00203	0.186062	0.370771	0.564276	0.972936	0.343708
0.32	0.429565	0.250435	0.252613	0.155052	0.236934	0.005217	0.170435	0.415652	0.695652	0.984348	0.003478	0.332174	0.582609	0.786087	1	0.001739	0.198261	0.429565	0.726957	0.998261	0.732174	0.109565	0.158261	0.041812	0.04878	0.003484	0.001739	0.349565	0.58087	0.8	1	0.062609	0.18087	0.246957	0.328696	0.956522	0.073043	0.163478	0.34087	0.426087	0.733913	0.438261	0.327526	0.024348	0.276522	0.549565	0.812174	0.991304	0.445217
0.386905	0.321429	0.291667	0.251497	0.215569	0.215569	0.029762	0.255952	0.434524	0.630952	0.964286	0.011905	0.303571	0.577381	0.779762	0.982143	0.005952	0.190476	0.47619	0.77381	1	0.434524	0.339286	0.22619	0.149701	0.053892	0.005988	0.005952	0.386905	0.52381	0.708333	1	0.142857	0.321429	0.565476	0.833333	0.994048	0.029762	0.077381	0.202381	0.64881	0.934524	0.505952	0.371257	0.029762	0.238095	0.571429	0.791667	0.994048	0.309524
0.454545	0.363636	0.181818	0.367816	0.172414	0.114943	0.034091	0.227273	0.454545	0.795455	1	0.022727	0.272727	0.534091	0.704545	0.988636	0.011364	0.318182	0.443182	0.75	0.943182	0.170455	0.011364	0.818182	0.022989	0.068966	0	0.011364	0.034091	0.488636	0.772727	1	0.761364	0.761364	0.761364	0.761364	0.761364	0.056818	0.25	0.454545	0.693182	0.977273	0.340909	0.45977	0.079545	0.352273	0.579545	0.75	0.943182	0.386364
0.369942	0.312139	0.317919	0.215116	0.255814	0.180233	0.011561	0.300578	0.50289	0.82659	1	0.040462	0.231214	0.543353	0.734104	0.99422	0.00578	0.202312	0.433526	0.66474	0.965318	0.34104	0.265896	0.393064	0.110465	0.063953	0.005814	0.00578	0.127168	0.491329	0.682081	1	0.011561	0.208092	0.526012	0.751445	0.83815	0.144509	0.306358	0.404624	0.861272	0.988439	0.358382	0.453488	0.017341	0.179191	0.479769	0.67052	0.965318	0.34104
0.35	0.45	0.2	0.305439	0.125523	0.138075	0.008333	0.1875	0.5125	0.766667	1	0.029167	0.2375	0.420833	0.583333	0.9875	0.004167	0.575	0.725	0.85	0.995833	0.645833	0.083333	0.270833	0.033473	0.09205	0	0.004167	0.1875	0.366667	0.5625	1	0.575	0.666667	0.6875	0.733333	0.8875	0.0125	0.5125	0.779167	0.904167	0.979167	0.2875	0.292887	0.025	0.404167	0.683333	0.829167	0.983333	0.4875
0.359844	0.380704	0.259452	0.249347	0.165796	0.184073	0.005215	0.284224	0.571056	0.837027	0.993481	0.002608	0.228162	0.507171	0.730117	0.994785	0.001304	0.237288	0.436767	0.649283	1	0.435463	0.11734	0.447197	0.049608	0.073107	0.005222	0.001304	0.249022	0.505867	0.756193	1	0.02086	0.241199	0.380704	0.542373	0.998696	0.039113	0.26206	0.550196	0.799218	0.986962	0.448501	0.336815	0.023468	0.209909	0.413299	0.601043	0.997392	0.422425
0.37	0.41	0.22	0.304348	0.197324	0.147157	0.006667	0.243333	0.45	0.703333	0.996667	0.01	0.213333	0.643333	0.823333	1	0.003333	0.253333	0.433333	0.586667	0.93	0.7	0.083333	0.216667	0.033445	0.040134	0	0.003333	0.306667	0.643333	0.816667	1	0.36	0.446667	0.466667	0.513333	0.613333	0.033333	0.223333	0.276667	0.423333	0.936667	0.28	0.32107	0.01	0.16	0.383333	0.513333	0.976667	0.396667
0.338235	0.448529	0.213235	0.237037	0.17037	0.118519	0.036765	0.25	0.470588	0.676471	1	0.044118	0.323529	0.654412	0.875	0.992647	0.007353	0.095588	0.294118	0.514706	0.691176	0.323529	0.161765	0.514706	0.059259	0.088889	0	0.007353	0.25	0.330882	0.463235	1	0.014706	0.205882	0.411765	0.477941	0.522059	0.051471	0.544118	0.676471	0.852941	0.992647	0.316176	0.281481	0.022059	0.176471	0.411765	0.588235	0.963235	0.477941
0.364789	0.370423	0.264789	0.248237	0.197461	0.211566	0.002817	0.215493	0.502817	0.757746	0.998592	0.005634	0.28169	0.504225	0.752113	0.997183	0.001408	0.253521	0.456338	0.694366	1	0.54507	0.207042	0.247887	0.084626	0.059238	0.002821	0.001408	0.201408	0.484507	0.760563	1	0.025352	0.287324	0.440845	0.646479	0.997183	0.042254	0.356338	0.566197	0.743662	0.95493	0.44507	0.344147	0.011268	0.257746	0.457746	0.738028	0.995775	0.384507
0.307971	0.362319	0.32971	0.210909	0.221818	0.210909	0.021739	0.26087	0.518116	0.768116	1	0.007246	0.221014	0.42029	0.721014	0.996377	0.003623	0.289855	0.51087	0.742754	0.98913	0.460145	0.257246	0.282609	0.087273	0.058182	0	0.003623	0.242754	0.423913	0.677536	1	0.123188	0.221014	0.5	0.721014	0.858696	0.007246	0.380435	0.561594	0.913043	0.985507	0.550725	0.356364	0.014493	0.304348	0.528986	0.742754	0.98913	0.427536
0.381275	0.367707	0.251018	0.258152	0.177989	0.157609	0.006784	0.213026	0.518318	0.791045	1	0.004071	0.229308	0.458616	0.709634	0.998643	0.001357	0.299864	0.523745	0.724559	0.997286	0.400271	0.024423	0.575305	0.009511	0.099185	0.001359	0.001357	0.105834	0.459973	0.815468	1	0.056988	0.061058	0.876526	0.881954	0.924016	0.157395	0.327001	0.506106	0.690638	0.993216	0.431479	0.347826	0.016282	0.332429	0.503392	0.693351	0.994573	0.393487
0.390244	0.280488	0.329268	0.17284	0.308642	0.197531	0.02439	0.280488	0.597561	0.792683	1	0.073171	0.170732	0.329268	0.560976	0.902439	0.012195	0.256098	0.47561	0.731707	0.963415	0.634146	0.268293	0.097561	0.123457	0.024691	0	0.012195	0.231707	0.52439	0.841463	1	0.134146	0.182927	0.304878	0.426829	0.621951	0.682927	0.695122	0.719512	0.743902	0.768293	0.353659	0.395062	0.060976	0.268293	0.45122	0.54878	0.804878	0.304878
0.406433	0.368421	0.225146	0.31085	0.14956	0.187683	0.011696	0.25731	0.549708	0.774854	1	0.005848	0.216374	0.461988	0.736842	0.997076	0.002924	0.263158	0.491228	0.701754	0.97076	0.584795	0.154971	0.260234	0.064516	0.070381	0	0.002924	0.192982	0.385965	0.74269	1	0.105263	0.184211	0.5	0.614035	0.979532	0.049708	0.476608	0.681287	0.868421	0.935673	0.418129	0.357771	0.023392	0.25731	0.5	0.74269	0.98538	0.397661
0.441727	0.305036	0.253237	0.255043	0.197406	0.184438	0.002878	0.283453	0.507914	0.720863	0.998561	0.008633	0.233094	0.494964	0.753957	1	0.001439	0.227338	0.446043	0.795683	0.994245	0.397122	0.047482	0.555396	0.023055	0.083573	0.002882	0.001439	0.146763	0.381295	0.765468	1	0.03741	0.08777	0.241727	0.264748	0.805755	0.010072	0.382734	0.568345	0.72518	0.995683	0.353957	0.377522	0.015827	0.221583	0.42446	0.743885	0.992806	0.320863
0.375	0.367647	0.257353	0.214815	0.2	0.177778	0.022059	0.242647	0.426471	0.676471	0.985294	0.014706	0.220588	0.536765	0.786765	1	0.007353	0.227941	0.477941	0.735294	0.977941	0.294118	0	0.705882	0	0.074074	0	0.007353	0.176471	0.639706	0.926471	1	0	0	0	0	0	0.058824	0.279412	0.455882	0.705882	0.897059	0.419118	0.474074	0.029412	0.308824	0.492647	0.698529	0.977941	0.338235
0.389937	0.339623	0.27044	0.303797	0.170886	0.164557	0.037736	0.257862	0.591195	0.767296	1	0.018868	0.27044	0.477987	0.679245	0.981132	0.006289	0.144654	0.433962	0.660377	0.987421	0.257862	0.314465	0.427673	0.050633	0.050633	0.012658	0.006289	0.251572	0.572327	0.918239	1	0.018868	0.446541	0.528302	0.616352	0.930818	0.08805	0.213836	0.352201	0.773585	0.880503	0.36478	0.392405	0.018868	0.18239	0.358491	0.540881	0.937107	0.358491
0.232877	0.554795	0.212329	0.223368	0.089347	0.216495	0.006849	0.363014	0.503425	0.756849	1	0.010274	0.243151	0.469178	0.688356	0.986301	0.003425	0.215753	0.527397	0.767123	0.996575	0.719178	0.075342	0.205479	0.054983	0.041237	0.006873	0.003425	0.239726	0.469178	0.763699	1	0.071918	0.099315	0.777397	0.821918	0.90411	0.14726	0.421233	0.5	0.558219	0.835616	0.469178	0.302405	0.013699	0.212329	0.441781	0.599315	0.907534	0.59589
0.345196	0.405694	0.24911	0.282143	0.167857	0.207143	0.017794	0.263345	0.508897	0.864769	0.996441	0.010676	0.298932	0.572954	0.743772	1	0.003559	0.185053	0.409253	0.569395	0.967972	0.683274	0.120996	0.19573	0.064286	0.071429	0	0.003559	0.362989	0.565836	0.765125	1	0.039146	0.135231	0.19573	0.298932	0.822064	0.081851	0.227758	0.341637	0.857651	0.975089	0.430605	0.342857	0.035587	0.202847	0.476868	0.604982	0.967972	0.380783
0.401763	0.241814	0.356423	0.181589	0.346784	0.184111	0.006297	0.253149	0.491184	0.739295	1	0.005038	0.251889	0.532746	0.74937	0.987406	0.001259	0.234257	0.479849	0.745592	0.998741	0.481108	0.234257	0.284635	0.094578	0.054224	0.001261	0.001259	0.209068	0.447103	0.738035	1	0.040302	0.211587	0.420655	0.798489	0.997481	0.006297	0.358942	0.575567	0.707809	0.992443	0.571788	0.401009	0.003778	0.245592	0.474811	0.739295	0.998741	0.260705
0.40458	0.274809	0.320611	0.176923	0.238462	0.176923	0.022901	0.305344	0.473282	0.687023	0.954198	0.053435	0.221374	0.541985	0.80916	0.984733	0.007634	0.198473	0.381679	0.778626	1	0.343511	0.366412	0.290076	0.176923	0.053846	0.007692	0.007634	0.335878	0.564885	0.725191	1	0.175573	0.389313	0.549618	0.80916	0.992366	0.022901	0.083969	0.244275	0.312977	0.916031	0.458015	0.430769	0.030534	0.244275	0.557252	0.793893	0.992366	0.267176
0.363014	0.363014	0.273973	0.310345	0.213793	0.17931	0.020548	0.253425	0.554795	0.753425	0.993151	0.013699	0.212329	0.410959	0.719178	1	0.006849	0.267123	0.486301	0.726027	0.90411	0.527397	0.130137	0.342466	0.041379	0.096552	0	0.006849	0.143836	0.369863	0.671233	1	0.260274	0.280822	0.452055	0.712329	0.746575	0.10274	0.513699	0.616438	0.815068	0.917808	0.39726	0.275862	0.068493	0.273973	0.554795	0.712329	0.924658	0.424658
0.403642	0.29742	0.298938	0.237082	0.212766	0.18541	0.004552	0.2261	0.482549	0.737481	0.990895	0.003035	0.233687	0.508346	0.778452	0.998483	0.001517	0.291351	0.505311	0.740516	1	0.509863	0.171472	0.318665	0.072948	0.06079	0	0.001517	0.224583	0.465857	0.770865	1	0.013657	0.233687	0.405159	0.585736	0.907436	0.047041	0.294385	0.599393	0.889226	0.992413	0.491654	0.325228	0.01214	0.280728	0.566009	0.799697	0.996965	0.306525
0.284404	0.449541	0.266055	0.271889	0.175115	0.235023	0.013761	0.243119	0.53211	0.738532	1	0.009174	0.215596	0.5	0.798165	0.986239	0.004587	0.233945	0.477064	0.674312	0.894495	0.440367	0.408257	0.151376	0.110599	0.036866	0	0.004587	0.266055	0.545872	0.779817	1	0.018349	0.302752	0.472477	0.623853	0.857798	0.082569	0.114679	0.247706	0.908257	0.949541	0.412844	0.442396	0.022936	0.243119	0.440367	0.655963	0.922018	0.454128
0.52193	0.302632	0.175439	0.273128	0.136564	0.114537	0.013158	0.254386	0.526316	0.789474	1	0.008772	0.311404	0.513158	0.719298	0.991228	0.004386	0.175439	0.399123	0.557018	0.881579	0.45614	0.087719	0.45614	0.035242	0.044053	0	0.004386	0.421053	0.596491	0.837719	1	0.100877	0.118421	0.486842	0.508772	0.885965	0.135965	0.245614	0.359649	0.714912	0.95614	0.289474	0.334802	0.030702	0.241228	0.425439	0.535088	0.881579	0.337719
0.354839	0.270968	0.374194	0.168831	0.25974	0.24026	0.025806	0.193548	0.483871	0.793548	0.987097	0.012903	0.206452	0.445161	0.735484	1	0.006452	0.264516	0.516129	0.709677	0.993548	0.296774	0	0.703226	0	0.103896	0	0.006452	0.187097	0.348387	0.729032	1	0	0	0	0	0	0.051613	0.251613	0.516129	0.76129	0.980645	0.522581	0.363636	0.058065	0.270968	0.548387	0.741935	0.974194	0.283871
0.36747	0.337349	0.295181	0.2	0.254545	0.248485	0.024096	0.319277	0.560241	0.753012	1	0.012048	0.174699	0.421687	0.716867	0.987952	0.006024	0.222892	0.487952	0.73494	0.981928	0.427711	0.180723	0.391566	0.084848	0.084848	0	0.006024	0.150602	0.403614	0.620482	1	0.060241	0.096386	0.391566	0.445783	0.975904	0.180723	0.319277	0.674699	0.789157	0.945783	0.415663	0.472727	0.03012	0.253012	0.475904	0.740964	0.981928	0.39759
0.386777	0.366942	0.246281	0.254967	0.165563	0.167219	0.009917	0.327273	0.560331	0.735537	0.990083	0.003306	0.221488	0.519008	0.803306	1	0.001653	0.18843	0.416529	0.628099	0.998347	0.619835	0.152066	0.228099	0.059603	0.062914	0	0.001653	0.261157	0.566942	0.743802	1	0.003306	0.161983	0.284298	0.522314	0.973554	0.036364	0.358678	0.505785	0.833058	0.995041	0.429752	0.304636	0.004959	0.191736	0.447934	0.852893	0.993388	0.428099
0.390418	0.346585	0.262997	0.272449	0.210204	0.184694	0.011213	0.264016	0.5158	0.715596	1	0.002039	0.234455	0.529052	0.792049	0.993884	0.001019	0.249745	0.447503	0.739042	0.997961	0.426096	0.061162	0.512742	0.026531	0.085714	0.002041	0.001019	0.246687	0.663609	0.833843	1	0.188583	0.739042	0.807339	0.866463	0.910296	0.004077	0.238532	0.398573	0.560652	0.997961	0.43527	0.355102	0.029562	0.258919	0.471967	0.768603	0.996942	0.359837
0.316838	0.328522	0.354639	0.198074	0.229711	0.243466	0.004124	0.28866	0.514089	0.752577	0.996564	0.002062	0.241924	0.498282	0.743643	0.998625	0.000687	0.235739	0.487285	0.749828	1	0.54433	0.360137	0.095533	0.114168	0.037139	0.008253	0.000687	0.261856	0.498282	0.717526	1	0.002062	0.201375	0.457045	0.754639	0.936082	0.04055	0.335395	0.626117	0.958076	0.998625	0.591753	0.316369	0.001375	0.243299	0.490722	0.753952	0.997938	0.34433
0.372007	0.3407	0.287293	0.236866	0.213825	0.2	0.002762	0.210866	0.462247	0.744936	1	0.001842	0.237569	0.48895	0.731123	0.999079	0.000921	0.334254	0.550645	0.775322	0.994475	0.441989	0.093002	0.465009	0.042396	0.086636	0.001843	0.000921	0.190608	0.394107	0.672192	1	0.005525	0.289134	0.384899	0.569061	0.95488	0.004604	0.361878	0.609576	0.78453	0.996317	0.476059	0.337327	0.005525	0.330571	0.541436	0.757827	0.994475	0.344383
0.25784	0.407666	0.334495	0.164336	0.188811	0.269231	0.006969	0.170732	0.508711	0.773519	1	0.010453	0.229965	0.463415	0.707317	0.993031	0.003484	0.278746	0.505226	0.763066	0.982578	0.425087	0.243902	0.33101	0.097902	0.076923	0	0.003484	0.156794	0.341463	0.567944	1	0.020906	0.191638	0.313589	0.466899	0.95122	0.348432	0.672474	0.783972	0.87108	0.982578	0.54007	0.398601	0.017422	0.28223	0.494774	0.752613	0.982578	0.390244
0.332226	0.421927	0.245847	0.32	0.163333	0.16	0.006645	0.23588	0.511628	0.76412	1	0.013289	0.245847	0.465116	0.770764	0.996678	0.003322	0.225914	0.518272	0.657807	0.966777	0.581395	0.106312	0.312292	0.06	0.073333	0	0.003322	0.245847	0.501661	0.777409	1	0.016611	0.053156	0.418605	0.528239	0.657807	0.079734	0.365449	0.554817	0.717608	0.990033	0.495017	0.326667	0.016611	0.285714	0.498339	0.757475	0.966777	0.458472
0.5	0.164062	0.335938	0.165354	0.362205	0.102362	0.039062	0.296875	0.570312	0.789062	1	0.023438	0.195312	0.476562	0.726562	0.914062	0.007812	0.179688	0.382812	0.65625	0.945312	0.429688	0.234375	0.335938	0.062992	0.07874	0	0.007812	0.179688	0.523438	0.65625	1	0.195312	0.242188	0.328125	0.40625	0.5	0.085938	0.15625	0.726562	0.84375	0.960938	0.359375	0.425197	0.046875	0.273438	0.484375	0.75	0.945312	0.234375
0.475129	0.307033	0.217839	0.248927	0.183691	0.142489	0.001715	0.144082	0.324185	0.642367	0.996569	0.005146	0.370497	0.614923	0.846484	0.998285	0.000858	0.435678	0.593482	0.754717	1	0.505146	0.107204	0.38765	0.046352	0.077253	0.00515	0.000858	0.20669	0.392796	0.686106	1	0.002573	0.543739	0.64494	0.750429	0.999142	0.012864	0.251286	0.556604	0.805317	0.988851	0.349914	0.291845	0.006861	0.483705	0.61235	0.755575	0.997427	0.367067
0.236842	0.52193	0.241228	0.211454	0.123348	0.229075	0.013158	0.298246	0.447368	0.75	0.995614	0.008772	0.197368	0.548246	0.745614	0.991228	0.004386	0.232456	0.451754	0.719298	1	0.79386	0.096491	0.109649	0.044053	0.026432	0	0.004386	0.25	0.574561	0.77193	1	0.149123	0.258772	0.285088	0.342105	0.460526	0.201754	0.223684	0.377193	0.403509	0.97807	0.570175	0.325991	0.017544	0.315789	0.596491	0.741228	0.986842	0.486842
0.27685	0.505967	0.217184	0.236842	0.145933	0.215311	0.00716	0.21957	0.424821	0.747017	0.99284	0.016706	0.362768	0.575179	0.782816	1	0.002387	0.150358	0.334129	0.630072	0.968974	0.653938	0.133652	0.212411	0.047847	0.066986	0	0.002387	0.393795	0.572792	0.792363	1	0.00716	0.090692	0.188544	0.272076	0.565632	0.0358	0.221957	0.377088	0.761337	0.995227	0.639618	0.315789	0.004773	0.315036	0.536993	0.718377	0.990453	0.465394
0.367089	0.299578	0.333333	0.182203	0.237288	0.224576	0.008439	0.223629	0.472574	0.797468	1	0.012658	0.244726	0.514768	0.755274	0.995781	0.004219	0.227848	0.489451	0.675105	0.991561	0.291139	0.042194	0.666667	0.021186	0.088983	0.004237	0.004219	0.392405	0.683544	0.805907	1	0.485232	0.489451	0.662447	0.670886	0.818565	0.012658	0.194093	0.409283	0.624473	0.987342	0.540084	0.372881	0.025316	0.303797	0.493671	0.662447	0.970464	0.362869
0.383562	0.369863	0.246575	0.275862	0.186207	0.165517	0.020548	0.315068	0.60274	0.842466	1	0.013699	0.19863	0.458904	0.650685	0.979452	0.006849	0.191781	0.452055	0.69863	0.972603	0.5	0.150685	0.349315	0.075862	0.048276	0.02069	0.006849	0.30137	0.438356	0.630137	1	0.191781	0.445205	0.547945	0.657534	0.979452	0.075342	0.171233	0.678082	0.767123	0.856164	0.363014	0.386207	0.034247	0.19863	0.431507	0.657534	0.910959	0.376712
0.389474	0.315789	0.294737	0.253968	0.232804	0.190476	0.015789	0.231579	0.5	0.715789	0.994737	0.010526	0.252632	0.468421	0.752632	0.973684	0.005263	0.247368	0.531579	0.736842	1	0.452632	0.163158	0.384211	0.074074	0.084656	0	0.005263	0.321053	0.484211	0.689474	1	0.015789	0.305263	0.715789	0.8	0.994737	0.047368	0.173684	0.415789	0.668421	0.963158	0.447368	0.455026	0.021053	0.242105	0.494737	0.678947	0.989474	0.415789
0.392	0.296	0.312	0.224449	0.260521	0.194389	0.004	0.232	0.466	0.744	0.998	0.014	0.302	0.532	0.752	1	0.002	0.252	0.506	0.748	0.992	0.39	0.194	0.416	0.058116	0.078156	0.006012	0.002	0.174	0.358	0.65	1	0.09	0.28	0.38	0.482	0.782	0.04	0.432	0.706	0.846	0.986	0.496	0.428858	0.01	0.282	0.51	0.75	0.992	0.37
0.318386	0.300448	0.381166	0.184685	0.247748	0.238739	0.017937	0.251121	0.479821	0.820628	0.986547	0.008969	0.192825	0.434978	0.641256	0.982063	0.004484	0.29148	0.529148	0.753363	1	0.430493	0.286996	0.282511	0.09009	0.045045	0	0.004484	0.201794	0.452915	0.704036	1	0.008969	0.116592	0.408072	0.64574	0.995516	0.295964	0.367713	0.686099	0.896861	0.96861	0.591928	0.333333	0.013453	0.295964	0.511211	0.726457	0.991031	0.376682
0.301887	0.40566	0.292453	0.251185	0.227488	0.21327	0.009434	0.221698	0.438679	0.669811	1	0.014151	0.240566	0.570755	0.84434	0.990566	0.004717	0.287736	0.495283	0.660377	0.886792	0.438679	0.363208	0.198113	0.127962	0.07109	0.004739	0.004717	0.273585	0.570755	0.783019	1	0.018868	0.283019	0.438679	0.613208	0.858491	0.080189	0.216981	0.556604	0.900943	0.985849	0.40566	0.454976	0.023585	0.245283	0.448113	0.660377	0.929245	0.415094
0.322292	0.388541	0.289167	0.248208	0.194444	0.236559	0.002686	0.231871	0.451209	0.724261	0.993733	0.001791	0.234557	0.495971	0.733214	1	0.000895	0.29991	0.558639	0.784244	0.999105	0.57744	0.145031	0.277529	0.083333	0.068996	0.002688	0.000895	0.233662	0.519248	0.734109	1	0.025962	0.594449	0.711728	0.840645	0.999105	0.007162	0.185318	0.406446	0.574754	0.991047	0.489705	0.387097	0.007162	0.313339	0.576544	0.772605	0.997314	0.402865
0.356828	0.330396	0.312775	0.256637	0.212389	0.212389	0.008811	0.202643	0.488987	0.726872	0.991189	0.013216	0.255507	0.54185	0.770925	0.977974	0.004405	0.246696	0.440529	0.678414	1	0.30837	0.101322	0.590308	0.035398	0.115044	0	0.004405	0.14978	0.431718	0.757709	1	0.440529	0.788546	0.845815	0.881057	0.907489	0.017621	0.255507	0.46696	0.629956	0.982379	0.502203	0.353982	0.017621	0.22467	0.431718	0.625551	0.986784	0.295154
0.359929	0.41844	0.221631	0.309059	0.152753	0.179396	0.005319	0.274823	0.489362	0.696809	0.996454	0.003546	0.265957	0.512411	0.72695	1	0.001773	0.189716	0.446809	0.810284	0.992908	0.638298	0.171986	0.189716	0.065719	0.044405	0.005329	0.001773	0.317376	0.491135	0.656028	1	0.019504	0.147163	0.324468	0.812057	0.994681	0.04078	0.191489	0.693262	0.886525	0.978723	0.379433	0.294849	0.01773	0.230496	0.402482	0.803191	0.994681	0.409574
0.37013	0.272727	0.357143	0.117647	0.300654	0.24183	0.012987	0.318182	0.487013	0.662338	0.961039	0.038961	0.188312	0.461039	0.720779	1	0.006494	0.220779	0.532468	0.811688	0.993506	0.337662	0.298701	0.363636	0.117647	0.078431	0.013072	0.006494	0.175325	0.577922	0.766234	1	0.032468	0.25974	0.623377	0.883117	0.980519	0.012987	0.311688	0.402597	0.493506	0.824675	0.396104	0.470588	0.032468	0.220779	0.545455	0.779221	0.980519	0.272727
0.361905	0.257143	0.380952	0.153846	0.269231	0.144231	0.057143	0.180952	0.533333	0.780952	0.971429	0.019048	0.285714	0.485714	0.67619	1	0.009524	0.209524	0.47619	0.704762	0.990476	0.438095	0.561905	0	0.173077	0	0	0.009524	0.27619	0.533333	0.790476	1	0.019048	0.190476	0.409524	0.704762	0.980952	0	0	0	0	0	0.390476	0.519231	0.019048	0.209524	0.457143	0.704762	0.980952	0.257143
0.364764	0.291563	0.343672	0.231056	0.265839	0.206211	0.008685	0.272953	0.524814	0.76799	0.996278	0.007444	0.229529	0.473945	0.738213	0.993797	0.001241	0.234491	0.490074	0.745658	1	0.483871	0.225806	0.290323	0.098137	0.053416	0.001242	0.001241	0.208437	0.452854	0.735732	1	0.004963	0.186104	0.431762	0.815136	0.96402	0.008685	0.333747	0.555831	0.709677	0.995037	0.575682	0.402484	0.002481	0.263027	0.48139	0.744417	0.996278	0.291563
0.299363	0.464968	0.235669	0.288462	0.185897	0.217949	0.012739	0.133758	0.382166	0.636943	0.961783	0.050955	0.273885	0.528662	0.808917	1	0.006369	0.363057	0.55414	0.719745	0.942675	0.630573	0.165605	0.203822	0.051282	0.064103	0.012821	0.006369	0.165605	0.324841	0.579618	1	0.11465	0.503185	0.757962	0.796178	0.942675	0.019108	0.535032	0.636943	0.859873	0.980892	0.394904	0.397436	0.019108	0.261146	0.484076	0.713376	0.942675	0.471338
0.403756	0.333333	0.262911	0.259434	0.254717	0.15566	0.014085	0.267606	0.492958	0.741784	1	0.00939	0.183099	0.408451	0.690141	0.995305	0.004695	0.319249	0.58216	0.779343	0.985915	0.488263	0.173709	0.338028	0.061321	0.070755	0.023585	0.004695	0.15493	0.516432	0.723005	1	0.230047	0.483568	0.638498	0.943662	0.99061	0.037559	0.328638	0.42723	0.737089	0.924883	0.460094	0.424528	0.018779	0.342723	0.502347	0.70892	0.985915	0.328638
0.394286	0.285714	0.32	0.212644	0.229885	0.224138	0.028571	0.234286	0.531429	0.811429	1	0.022857	0.24	0.497143	0.731429	0.982857	0.005714	0.251429	0.474286	0.725714	0.988571	0.377143	0.268571	0.354286	0.074713	0.074713	0.017241	0.005714	0.2	0.411429	0.588571	1	0.177143	0.297143	0.468571	0.76	0.845714	0.028571	0.125714	0.628571	0.897143	0.988571	0.468571	0.287356	0.017143	0.257143	0.457143	0.657143	0.965714	0.268571
0.391837	0.338776	0.269388	0.22541	0.20082	0.147541	0.008163	0.142857	0.432653	0.722449	0.991837	0.028571	0.244898	0.428571	0.759184	1	0.004082	0.412245	0.620408	0.746939	0.995918	0.563265	0.216327	0.220408	0.057377	0.04918	0.008197	0.004082	0.15102	0.318367	0.718367	1	0.244898	0.359184	0.559184	0.738776	0.959184	0.020408	0.395918	0.608163	0.783673	0.902041	0.432653	0.319672	0.020408	0.37551	0.555102	0.706122	0.987755	0.363265
0.340136	0.340136	0.319728	0.253425	0.246575	0.226027	0.034014	0.285714	0.557823	0.748299	1	0.020408	0.176871	0.360544	0.591837	0.993197	0.006803	0.319728	0.564626	0.755102	0.972789	0.639456	0.156463	0.204082	0.054795	0.054795	0.013699	0.006803	0.170068	0.333333	0.591837	1	0.129252	0.52381	0.761905	0.823129	0.986395	0.027211	0.557823	0.659864	0.884354	0.938776	0.408163	0.410959	0.027211	0.285714	0.455782	0.741497	0.972789	0.360544
0.322531	0.449074	0.228395	0.285935	0.145286	0.196291	0.009259	0.228395	0.54321	0.811728	1	0.003086	0.311728	0.515432	0.780864	0.993827	0.001543	0.154321	0.429012	0.595679	0.984568	0.682099	0.057099	0.260802	0.02473	0.040185	0.009274	0.001543	0.307099	0.510802	0.819444	1	0.054012	0.08179	0.385802	0.470679	0.966049	0.021605	0.228395	0.530864	0.621914	0.720679	0.507716	0.31221	0.010802	0.216049	0.476852	0.635802	0.967593	0.453704
0.321429	0.401786	0.276786	0.198198	0.189189	0.288288	0.0625	0.366071	0.633929	0.821429	1	0.017857	0.151786	0.383929	0.678571	0.9375	0.008929	0.205357	0.446429	0.6875	0.991071	0.598214	0.232143	0.169643	0.09009	0.036036	0	0.008929	0.142857	0.491071	0.839286	1	0.178571	0.410714	0.553571	0.776786	0.973214	0.285714	0.3125	0.357143	0.651786	0.696429	0.357143	0.324324	0.026786	0.241071	0.455357	0.598214	0.982143	0.375
0.353695	0.333005	0.3133	0.218935	0.229783	0.216963	0.00197	0.224631	0.493596	0.744828	1	0.011823	0.231527	0.454187	0.725123	0.99803	0.000985	0.28867	0.544828	0.776355	0.997044	0.44335	0.13202	0.424631	0.059172	0.086785	0.005917	0.000985	0.155665	0.359606	0.744828	1	0.025616	0.24335	0.545813	0.848276	0.990148	0.00197	0.400985	0.565517	0.712315	0.996059	0.504433	0.378698	0.003941	0.29064	0.539901	0.781281	0.997044	0.330049
0.38125	0.425	0.19375	0.319415	0.14405	0.179541	0.008333	0.241667	0.522917	0.745833	0.997917	0.00625	0.24375	0.466667	0.785417	1	0.002083	0.2625	0.464583	0.689583	0.975	0.604167	0.122917	0.272917	0.056367	0.08977	0.002088	0.002083	0.2125	0.41875	0.7625	1	0.01875	0.139583	0.275	0.570833	0.70625	0.0375	0.460417	0.63125	0.79375	0.977083	0.466667	0.338205	0.01875	0.297917	0.535417	0.74375	0.985417	0.452083
0.281022	0.408759	0.310219	0.227771	0.202192	0.274056	0.002433	0.243309	0.489051	0.73236	1	0.004866	0.248175	0.515815	0.759124	0.995134	0.001217	0.244526	0.486618	0.738443	0.997567	0.458637	0.238443	0.30292	0.097442	0.053593	0.002436	0.001217	0.199513	0.469586	0.742092	1	0.037713	0.253041	0.409976	0.801703	0.997567	0.006083	0.312652	0.555961	0.710462	0.992701	0.564477	0.375152	0.00365	0.26764	0.491484	0.733577	0.997567	0.447689
0.336	0.5136	0.1504	0.264423	0.129808	0.11859	0.0064	0.2992	0.4912	0.6992	0.9984	0.0032	0.184	0.5392	0.8	1	0.0016	0.2912	0.4624	0.6224	0.9712	0.7136	0.056	0.2304	0.030449	0.033654	0.004808	0.0016	0.2	0.496	0.7536	1	0.1488	0.4016	0.4304	0.5024	0.992	0.128	0.3376	0.5232	0.9008	0.9808	0.4544	0.384615	0.0048	0.3296	0.5632	0.8176	0.992	0.5232
0.3	0.413333	0.286667	0.22964	0.192256	0.221629	0.005333	0.250667	0.510667	0.78	0.998667	0.006667	0.228	0.530667	0.721333	0.997333	0.001333	0.265333	0.445333	0.753333	1	0.632	0.184	0.184	0.093458	0.058745	0.00534	0.001333	0.221333	0.528	0.730667	1	0.004	0.297333	0.446667	0.797333	0.985333	0.033333	0.286667	0.458667	0.816	0.981333	0.550667	0.368491	0.012	0.313333	0.550667	0.748	0.996	0.442667
0.330144	0.330144	0.339713	0.232614	0.247002	0.230216	0.014354	0.244019	0.483254	0.739234	0.997608	0.004785	0.241627	0.511962	0.755981	1	0.002392	0.258373	0.504785	0.712919	0.992823	0.394737	0.148325	0.456938	0.06235	0.091127	0.004796	0.002392	0.222488	0.538278	0.80622	1	0.08134	0.282297	0.516746	0.906699	0.961722	0.009569	0.244019	0.421053	0.669856	0.866029	0.569378	0.364508	0.009569	0.239234	0.452153	0.698565	0.992823	0.349282
0.410156	0.320312	0.269531	0.25098	0.239216	0.188235	0.023438	0.265625	0.535156	0.722656	1	0.007812	0.183594	0.453125	0.691406	0.996094	0.003906	0.230469	0.523438	0.792969	0.980469	0.5625	0.28125	0.15625	0.109804	0.054902	0	0.003906	0.277344	0.523438	0.664062	1	0.027344	0.191406	0.464844	0.8125	0.980469	0.054688	0.261719	0.433594	0.886719	0.925781	0.335938	0.345098	0.015625	0.328125	0.539062	0.789062	0.980469	0.386719
0.407407	0.333333	0.259259	0.308411	0.186916	0.196262	0.027778	0.203704	0.509259	0.722222	1	0.018519	0.222222	0.388889	0.703704	0.962963	0.009259	0.416667	0.564815	0.833333	0.981481	0.675926	0.046296	0.277778	0.056075	0.074766	0	0.009259	0.166667	0.351852	0.537037	1	0.194444	0.194444	0.203704	0.509259	0.685185	0.546296	0.611111	0.824074	0.888889	0.972222	0.361111	0.429907	0.037037	0.444444	0.62963	0.861111	0.981481	0.361111
0.388235	0.329412	0.282353	0.25	0.214286	0.178571	0.070588	0.223529	0.517647	0.658824	1	0.058824	0.341176	0.623529	0.835294	0.988235	0.011765	0.152941	0.352941	0.6	0.894118	0.317647	0.305882	0.376471	0.119048	0.047619	0	0.011765	0.188235	0.435294	0.917647	1	0.023529	0.082353	0.235294	0.341176	0.494118	0.517647	0.6	0.694118	0.811765	0.905882	0.388235	0.47619	0.023529	0.211765	0.4	0.564706	0.929412	0.4
0.320388	0.383495	0.296117	0.253659	0.239024	0.214634	0.029126	0.26699	0.480583	0.728155	1	0.009709	0.199029	0.538835	0.868932	0.995146	0.004854	0.262136	0.456311	0.669903	0.864078	0.398058	0.446602	0.15534	0.126829	0.058537	0	0.004854	0.276699	0.558252	0.81068	1	0.019417	0.300971	0.480583	0.621359	0.859223	0.082524	0.116505	0.257282	0.917476	0.990291	0.412621	0.429268	0.024272	0.257282	0.441748	0.65534	0.864078	0.432039
0.481928	0.253012	0.26506	0.268293	0.231707	0.121951	0.060241	0.289157	0.46988	0.686747	1	0.024096	0.26506	0.506024	0.831325	0.987952	0.012048	0.180723	0.481928	0.698795	0.903614	0.253012	0	0.746988	0	0.073171	0	0.012048	0.060241	0.325301	0.771084	1	0	0	0	0	0	0.072289	0.240964	0.493976	0.674699	0.927711	0.325301	0.365854	0.072289	0.192771	0.566265	0.795181	0.915663	0.277108
0.300373	0.419776	0.279851	0.214953	0.181308	0.246729	0.005597	0.20709	0.43097	0.76306	0.996269	0.009328	0.31903	0.576493	0.742537	1	0.001866	0.231343	0.466418	0.73694	0.981343	0.632463	0.160448	0.20709	0.059813	0.052336	0	0.001866	0.276119	0.567164	0.727612	1	0.016791	0.171642	0.335821	0.848881	0.981343	0.035448	0.218284	0.438433	0.779851	0.955224	0.626866	0.261682	0.009328	0.333955	0.552239	0.723881	0.981343	0.440299
0.386831	0.308642	0.304527	0.235537	0.210744	0.202479	0.012346	0.213992	0.481481	0.72428	0.99177	0.00823	0.246914	0.563786	0.798354	0.995885	0.004115	0.263374	0.45679	0.716049	1	0.329218	0.082305	0.588477	0.033058	0.107438	0	0.004115	0.176955	0.44856	0.794239	1	0.45679	0.781893	0.835391	0.855967	0.884774	0.041152	0.26749	0.473251	0.63786	0.975309	0.485597	0.347107	0.045267	0.259259	0.45679	0.654321	0.971193	0.325103
0.283753	0.487414	0.228833	0.243119	0.133028	0.213303	0.006865	0.228833	0.430206	0.677346	0.997712	0.004577	0.235698	0.553776	0.764302	1	0.002288	0.299771	0.498856	0.748284	0.961098	0.702517	0.141876	0.155606	0.057339	0.048165	0.002294	0.002288	0.281465	0.610984	0.789474	1	0.032037	0.210526	0.304348	0.421053	0.963387	0.048055	0.270023	0.437071	0.521739	0.938215	0.585812	0.330275	0.011442	0.322654	0.592677	0.750572	0.988558	0.462243
0.379001	0.370038	0.25096	0.289744	0.166667	0.203846	0.002561	0.211268	0.482714	0.742638	0.99872	0.005122	0.265045	0.536492	0.769526	1	0.00128	0.254802	0.462228	0.724712	0.997439	0.582586	0.15749	0.259923	0.062821	0.057692	0.003846	0.00128	0.294494	0.556978	0.848912	1	0.014085	0.284251	0.454545	0.641485	0.81306	0.058899	0.183099	0.362356	0.650448	0.988476	0.475032	0.379487	0.003841	0.290653	0.53009	0.800256	0.997439	0.357234
0.378788	0.32197	0.299242	0.231499	0.214421	0.201139	0.003788	0.17803	0.410985	0.714015	1	0.017045	0.219697	0.450758	0.727273	0.996212	0.001894	0.420455	0.600379	0.778409	0.998106	0.549242	0.142045	0.308712	0.051233	0.062619	0.005693	0.001894	0.136364	0.278409	0.619318	1	0.214015	0.524621	0.67803	0.844697	0.9375	0.295455	0.44697	0.604167	0.808712	0.994318	0.488636	0.349146	0.00947	0.390152	0.57197	0.791667	0.994318	0.340909
0.334928	0.294258	0.370813	0.194245	0.280576	0.218225	0.004785	0.289474	0.509569	0.748804	0.997608	0.011962	0.200957	0.507177	0.729665	0.995215	0.002392	0.251196	0.4689	0.772727	1	0.361244	0.138756	0.5	0.076739	0.100719	0.004796	0.002392	0.212919	0.54067	0.799043	1	0.047847	0.174641	0.533493	0.92823	0.995215	0.009569	0.258373	0.476077	0.712919	0.942584	0.586124	0.364508	0.009569	0.244019	0.471292	0.674641	0.995215	0.322967
0.366935	0.322581	0.310484	0.271255	0.218623	0.190283	0.008065	0.221774	0.491935	0.741935	1	0.032258	0.254032	0.532258	0.822581	0.987903	0.004032	0.245968	0.439516	0.657258	0.991935	0.330645	0.084677	0.584677	0.032389	0.11336	0	0.004032	0.169355	0.447581	0.778226	1	0.439516	0.766129	0.826613	0.846774	0.879032	0.040323	0.258065	0.459677	0.620968	0.983871	0.495968	0.364372	0.016129	0.245968	0.447581	0.685484	0.987903	0.278226
0.397516	0.31677	0.285714	0.2125	0.20625	0.2	0.018634	0.167702	0.391304	0.602484	1	0.012422	0.229814	0.583851	0.850932	0.987578	0.006211	0.310559	0.596273	0.763975	0.993789	0.515528	0.15528	0.329193	0.075	0.0875	0	0.006211	0.267081	0.602484	0.857143	1	0.180124	0.571429	0.677019	0.732919	0.981366	0.018634	0.142857	0.329193	0.453416	0.78882	0.459627	0.325	0.080745	0.360248	0.614907	0.751553	0.981366	0.304348
0.325472	0.377358	0.29717	0.241706	0.189573	0.2891	0.028302	0.339623	0.589623	0.759434	1	0.009434	0.193396	0.410377	0.754717	0.995283	0.004717	0.179245	0.481132	0.693396	0.966981	0.580189	0.226415	0.193396	0.085308	0.066351	0	0.004717	0.188679	0.542453	0.778302	1	0.051887	0.283019	0.367925	0.811321	0.886792	0.014151	0.240566	0.415094	0.679245	0.79717	0.448113	0.388626	0.014151	0.283019	0.617925	0.806604	0.966981	0.377358
0.357143	0.330357	0.3125	0.2287	0.215247	0.201794	0.026786	0.245536	0.477679	0.732143	1	0.022321	0.263393	0.446429	0.75	0.986607	0.004464	0.183036	0.535714	0.736607	0.991071	0.522321	0.151786	0.325893	0.089686	0.06278	0	0.004464	0.272321	0.410714	0.696429	1	0.013393	0.066964	0.5625	0.71875	0.919643	0.09375	0.196429	0.540179	0.794643	0.986607	0.513393	0.376682	0.017857	0.330357	0.513393	0.78125	0.991071	0.357143
0.456522	0.304348	0.23913	0.252747	0.197802	0.142857	0.032609	0.26087	0.641304	0.858696	1	0.021739	0.23913	0.521739	0.706522	0.934783	0.01087	0.184783	0.380435	0.5	0.793478	0.630435	0.25	0.119565	0.10989	0.043956	0	0.01087	0.217391	0.5	0.815217	1	0.141304	0.184783	0.304348	0.423913	0.597826	0.641304	0.652174	0.684783	0.717391	0.836957	0.347826	0.351648	0.065217	0.206522	0.434783	0.532609	0.728261	0.369565
0.417178	0.358896	0.223926	0.32	0.181538	0.141538	0.021472	0.300613	0.555215	0.791411	1	0.006135	0.211656	0.496933	0.769939	0.981595	0.003067	0.251534	0.43865	0.570552	0.93865	0.493865	0.095092	0.411043	0.055385	0.073846	0	0.003067	0.214724	0.411043	0.674847	1	0.01227	0.046012	0.374233	0.481595	0.601227	0.064417	0.358896	0.631902	0.858896	0.990798	0.447853	0.326154	0.01227	0.248466	0.435583	0.613497	0.981595	0.386503
0.377358	0.36478	0.257862	0.240506	0.183544	0.202532	0.012579	0.257862	0.603774	0.811321	1	0.037736	0.27044	0.433962	0.704403	0.987421	0.006289	0.188679	0.402516	0.616352	0.968553	0.36478	0.201258	0.433962	0.06962	0.094937	0.018987	0.006289	0.27044	0.603774	0.893082	1	0.025157	0.226415	0.314465	0.402516	0.981132	0.100629	0.201258	0.540881	0.72327	0.874214	0.371069	0.341772	0.025157	0.163522	0.377358	0.522013	0.930818	0.377358
0.3657	0.310214	0.324086	0.20202	0.268939	0.207071	0.002522	0.254729	0.491803	0.742749	1	0.005044	0.240858	0.535939	0.784363	0.993695	0.001261	0.221942	0.479193	0.722573	0.996217	0.464061	0.235813	0.300126	0.102273	0.056818	0.003788	0.001261	0.208071	0.448928	0.737705	1	0.039092	0.199243	0.423707	0.79319	0.996217	0.006305	0.325347	0.577554	0.751576	0.991173	0.57377	0.424242	0.003783	0.266078	0.482976	0.747793	0.996217	0.364439
0.456522	0.326087	0.217391	0.296703	0.263736	0.142857	0.021739	0.25	0.456522	0.717391	1	0.043478	0.217391	0.543478	0.706522	0.934783	0.01087	0.152174	0.391304	0.771739	0.978261	0.532609	0.326087	0.141304	0.175824	0.043956	0	0.01087	0.326087	0.597826	0.793478	1	0.021739	0.097826	0.228261	0.75	0.98913	0.380435	0.402174	0.434783	0.467391	0.576087	0.206522	0.373626	0.108696	0.184783	0.456522	0.75	0.956522	0.347826
0.297101	0.427536	0.275362	0.255474	0.160584	0.211679	0.014493	0.224638	0.485507	0.811594	1	0.028986	0.304348	0.521739	0.753623	0.963768	0.007246	0.137681	0.456522	0.666667	0.985507	0.681159	0.188406	0.130435	0.10219	0.043796	0.014599	0.007246	0.268116	0.442029	0.746377	1	0.449275	0.550725	0.688406	0.818841	0.985507	0.065217	0.086957	0.130435	0.15942	0.673913	0.405797	0.321168	0.021739	0.137681	0.550725	0.702899	0.985507	0.434783
0.335329	0.377246	0.287425	0.256	0.186	0.228	0.003992	0.275449	0.552894	0.854291	1	0.00998	0.201597	0.403194	0.704591	0.996008	0.001996	0.297405	0.512974	0.700599	0.962076	0.44511	0.157685	0.397206	0.06	0.076	0.004	0.001996	0.115768	0.349301	0.702595	1	0.125749	0.397206	0.562874	0.746507	0.848303	0.0998	0.329341	0.548902	0.858283	0.984032	0.48503	0.328	0.005988	0.301397	0.491018	0.724551	0.924152	0.411178
0.444444	0.261111	0.294444	0.256983	0.307263	0.122905	0.011111	0.25	0.494444	0.738889	1	0.016667	0.194444	0.394444	0.688889	0.977778	0.005556	0.283333	0.533333	0.788889	0.966667	0.383333	0.283333	0.333333	0.094972	0.050279	0.01676	0.005556	0.116667	0.466667	0.727778	1	0.083333	0.211111	0.516667	0.866667	0.972222	0.088889	0.394444	0.588889	0.766667	0.911111	0.427778	0.435754	0.083333	0.283333	0.544444	0.761111	0.977778	0.283333
0.322917	0.291667	0.385417	0.147368	0.263158	0.252632	0.083333	0.229167	0.4375	0.875	1	0.041667	0.28125	0.552083	0.760417	0.947917	0.010417	0.177083	0.395833	0.645833	0.9375	0.28125	0.4375	0.28125	0.115789	0.073684	0.010526	0.010417	0.21875	0.520833	0.760417	1	0.145833	0.260417	0.427083	0.614583	0.75	0.03125	0.083333	0.822917	0.895833	0.96875	0.489583	0.4	0.03125	0.260417	0.447917	0.677083	0.9375	0.322917
0.36534	0.393443	0.241218	0.248535	0.173505	0.203986	0.004684	0.277518	0.514052	0.74356	0.998829	0.002342	0.208431	0.429742	0.713115	0.991803	0.001171	0.272834	0.537471	0.797424	1	0.586651	0.118267	0.295082	0.059789	0.071512	0.008206	0.001171	0.201405	0.409836	0.668618	1	0.016393	0.144028	0.377049	0.567916	0.980094	0.070258	0.482436	0.741218	0.855972	0.996487	0.352459	0.361079	0.016393	0.192037	0.47541	0.795082	0.994145	0.400468
0.327273	0.42303	0.249697	0.275485	0.163835	0.206311	0.002424	0.241212	0.470303	0.779394	0.997576	0.006061	0.247273	0.558788	0.76	1	0.001212	0.270303	0.446061	0.681212	0.998788	0.486061	0.13697	0.37697	0.050971	0.080097	0.002427	0.001212	0.139394	0.408485	0.689697	1	0.007273	0.309091	0.473939	0.606061	0.718788	0.110303	0.344242	0.642424	0.835152	0.995152	0.442424	0.288835	0.006061	0.284848	0.493333	0.687273	0.996364	0.458182
0.21097	0.565401	0.223629	0.207627	0.09322	0.224576	0.016878	0.248945	0.396624	0.565401	1	0.021097	0.274262	0.590717	0.780591	0.983122	0.004219	0.202532	0.438819	0.628692	0.995781	0.759494	0.135021	0.105485	0.067797	0.033898	0	0.004219	0.341772	0.607595	0.810127	1	0.139241	0.253165	0.312236	0.409283	0.561181	0.084388	0.198312	0.223629	0.362869	0.751055	0.544304	0.305085	0.008439	0.375527	0.64557	0.793249	0.978903	0.527426
0.337963	0.37963	0.282407	0.269767	0.15814	0.237209	0.009259	0.277778	0.509259	0.731481	0.986111	0.018519	0.240741	0.430556	0.763889	1	0.00463	0.185185	0.523148	0.717593	0.944444	0.541667	0.143519	0.314815	0.083721	0.065116	0	0.00463	0.273148	0.416667	0.722222	1	0.009259	0.055556	0.564815	0.712963	0.893519	0.092593	0.194444	0.541667	0.763889	0.949074	0.49537	0.353488	0.013889	0.324074	0.509259	0.75	0.949074	0.375
0.314168	0.471253	0.214579	0.265159	0.127441	0.197328	0.00308	0.341889	0.534908	0.778234	0.997947	0.002053	0.163244	0.36345	0.655031	0.991786	0.001027	0.408624	0.644764	0.808008	1	0.727926	0.090349	0.181725	0.033916	0.046249	0.003083	0.001027	0.186858	0.371663	0.565708	1	0.290554	0.678645	0.786448	0.867556	0.945585	0.00924	0.626283	0.734086	0.859343	0.977413	0.568789	0.343268	0.005133	0.183778	0.475359	0.727926	0.99076	0.511294
0.330275	0.311927	0.357798	0.203704	0.231481	0.240741	0.045872	0.330275	0.623853	0.770642	1	0.018349	0.192661	0.40367	0.587156	0.972477	0.009174	0.238532	0.440367	0.779817	0.954128	0.376147	0.256881	0.366972	0.083333	0.083333	0.027778	0.009174	0.311927	0.495413	0.87156	1	0.036697	0.091743	0.449541	0.568807	0.844037	0.146789	0.229358	0.642202	0.761468	0.954128	0.458716	0.425926	0.036697	0.211009	0.477064	0.688073	0.954128	0.321101
0.351852	0.277778	0.37037	0.197026	0.256506	0.197026	0.011111	0.2	0.462963	0.677778	0.996296	0.007407	0.277778	0.618519	0.833333	0.988889	0.003704	0.240741	0.42963	0.711111	1	0.377778	0.148148	0.474074	0.052045	0.074349	0.01487	0.003704	0.240741	0.577778	0.759259	1	0.251852	0.533333	0.707407	0.774074	0.914815	0.051852	0.207407	0.362963	0.618519	0.988889	0.518519	0.386617	0.037037	0.277778	0.459259	0.748148	0.992593	0.296296
0.321321	0.357357	0.321321	0.192771	0.192771	0.262048	0.021021	0.234234	0.432432	0.747748	0.984985	0.006006	0.231231	0.522523	0.78979	1	0.003003	0.255255	0.498498	0.693694	0.993994	0.414414	0.048048	0.537538	0.018072	0.108434	0.006024	0.003003	0.189189	0.525526	0.798799	1	0.537538	0.774775	0.813814	0.825826	0.843844	0.006006	0.264264	0.462462	0.645646	0.984985	0.438438	0.403614	0.012012	0.264264	0.495495	0.696697	0.978979	0.372372
0.389671	0.239437	0.370892	0.152941	0.284706	0.183529	0.004695	0.253521	0.502347	0.753521	0.997653	0.035211	0.232394	0.521127	0.751174	1	0.002347	0.239437	0.474178	0.730047	0.992958	0.359155	0.140845	0.5	0.070588	0.089412	0.004706	0.002347	0.206573	0.549296	0.809859	1	0.039906	0.279343	0.518779	0.91784	0.995305	0.007042	0.253521	0.460094	0.704225	0.946009	0.586854	0.343529	0.00939	0.246479	0.462441	0.669014	0.992958	0.239437
0.317181	0.351164	0.331655	0.209068	0.222922	0.22796	0.001259	0.246067	0.473254	0.751416	0.996224	0.005035	0.229704	0.510384	0.765261	0.998112	0.000629	0.268722	0.505979	0.737571	1	0.451857	0.126495	0.421649	0.051637	0.081864	0.005038	0.000629	0.293266	0.535557	0.75708	1	0.003147	0.294525	0.487099	0.599119	0.98112	0.008181	0.240403	0.445563	0.743864	0.996853	0.518565	0.381612	0.003147	0.24292	0.487728	0.701699	0.995595	0.372561
0.308219	0.424658	0.267123	0.237113	0.195876	0.237113	0.034247	0.321918	0.554795	0.797945	0.996575	0.006849	0.178082	0.496575	0.688356	0.986301	0.003425	0.205479	0.400685	0.743151	1	0.575342	0.208904	0.215753	0.085911	0.051546	0.003436	0.003425	0.19863	0.434932	0.702055	1	0.044521	0.39726	0.523973	0.815068	0.969178	0.020548	0.35274	0.5	0.763699	0.921233	0.39726	0.309278	0.017123	0.311644	0.496575	0.791096	0.972603	0.465753
0.328592	0.361309	0.3101	0.270655	0.19943	0.252137	0.008535	0.28734	0.524893	0.780939	0.995733	0.002845	0.201991	0.450925	0.69559	1	0.001422	0.27596	0.523471	0.761024	0.998578	0.409673	0.186344	0.403983	0.086895	0.066952	0.007123	0.001422	0.302987	0.499289	0.796586	1	0.009957	0.186344	0.418208	0.890469	0.997155	0.032717	0.278805	0.550498	0.687055	0.927454	0.536273	0.378917	0.01138	0.26458	0.480797	0.708393	0.998578	0.376956
0.332898	0.402089	0.265013	0.235294	0.181699	0.188235	0.003916	0.263708	0.505222	0.738903	1	0.002611	0.18799	0.443864	0.766319	0.998695	0.001305	0.355091	0.537859	0.741514	0.993473	0.556136	0.120104	0.32376	0.047059	0.099346	0.005229	0.001305	0.193211	0.455614	0.793734	1	0.011749	0.519582	0.655352	0.727154	0.949086	0.009138	0.266319	0.468668	0.680157	0.98564	0.506527	0.420915	0.009138	0.253264	0.544386	0.75718	0.993473	0.385117
0.405229	0.326797	0.267974	0.263158	0.223684	0.171053	0.013072	0.215686	0.503268	0.712418	0.986928	0.045752	0.20915	0.418301	0.784314	0.980392	0.006536	0.320261	0.529412	0.771242	1	0.653595	0.137255	0.20915	0.065789	0.052632	0.013158	0.006536	0.176471	0.339869	0.614379	1	0.117647	0.496732	0.777778	0.843137	0.993464	0.019608	0.529412	0.653595	0.908497	0.960784	0.392157	0.407895	0.019608	0.267974	0.424837	0.69281	0.980392	0.359477
0.348238	0.407859	0.243902	0.255088	0.195387	0.170963	0.00813	0.239837	0.463415	0.701897	0.998645	0.00271	0.226287	0.440379	0.765583	0.99729	0.001355	0.314363	0.571816	0.768293	1	0.655827	0.150407	0.193767	0.067843	0.059701	0.005427	0.001355	0.222222	0.428184	0.677507	1	0.014905	0.318428	0.577236	0.754743	0.936314	0.02168	0.384824	0.558266	0.882114	0.993225	0.397019	0.415197	0.01355	0.342818	0.554201	0.772358	0.993225	0.399729
0.389831	0.305085	0.305085	0.222222	0.273504	0.145299	0.025424	0.262712	0.508475	0.720339	0.991525	0.059322	0.372881	0.584746	0.822034	1	0.008475	0.161017	0.347458	0.669492	0.898305	0.423729	0.245763	0.330508	0.08547	0.051282	0	0.008475	0.254237	0.576271	0.737288	1	0.033898	0.220339	0.440678	0.542373	0.694915	0.101695	0.169492	0.364407	0.830508	0.915254	0.389831	0.410256	0.033898	0.211864	0.449153	0.728814	0.923729	0.254237
0.388797	0.341021	0.270181	0.264026	0.188119	0.168317	0.009885	0.172982	0.425041	0.721582	0.998353	0.004942	0.266886	0.520593	0.759473	0.990115	0.001647	0.359143	0.555189	0.769357	1	0.487644	0.149918	0.362438	0.054455	0.087459	0.00495	0.001647	0.16145	0.299835	0.609555	1	0.008237	0.494234	0.68369	0.843493	0.924217	0.06425	0.410214	0.593081	0.785832	0.996705	0.484349	0.359736	0.003295	0.390445	0.561779	0.775947	0.99341	0.372323
0.330275	0.302752	0.366972	0.203704	0.25	0.240741	0.036697	0.247706	0.495413	0.779817	1	0.018349	0.302752	0.513761	0.733945	0.963303	0.009174	0.229358	0.440367	0.715596	0.990826	0.422018	0.577982	0	0.203704	0	0	0.009174	0.275229	0.522936	0.752294	1	0.027523	0.229358	0.449541	0.706422	0.981651	0	0	0	0	0	0.431193	0.314815	0.045872	0.238532	0.568807	0.697248	0.990826	0.357798
0.353312	0.312303	0.334385	0.205696	0.231013	0.205696	0.009464	0.246057	0.545741	0.788644	0.990536	0.006309	0.217666	0.476341	0.712934	0.996845	0.003155	0.26183	0.495268	0.722397	1	0.432177	0.173502	0.394322	0.06962	0.082278	0.012658	0.003155	0.208202	0.492114	0.776025	1	0.009464	0.11041	0.523659	0.687697	0.990536	0.07571	0.290221	0.422713	0.766562	0.987382	0.570978	0.35443	0.012618	0.264984	0.501577	0.690852	0.993691	0.29653
0.31746	0.376984	0.305556	0.215139	0.195219	0.247012	0.02381	0.301587	0.527778	0.797619	1	0.007937	0.257937	0.511905	0.738095	0.972222	0.003968	0.202381	0.43254	0.68254	0.996032	0.305556	0.011905	0.68254	0.007968	0.12749	0	0.003968	0.206349	0.428571	0.666667	1	0.984127	0.984127	0.984127	0.988095	0.992063	0.011905	0.25	0.507937	0.75	0.968254	0.555556	0.390438	0.011905	0.265873	0.511905	0.706349	0.996032	0.380952
0.30814	0.383721	0.30814	0.251462	0.187135	0.216374	0.011628	0.174419	0.395349	0.715116	1	0.034884	0.290698	0.540698	0.755814	0.994186	0.005814	0.203488	0.5	0.703488	0.988372	0.348837	0.232558	0.418605	0.093567	0.081871	0.011696	0.005814	0.244186	0.453488	0.697674	1	0.087209	0.186047	0.267442	0.540698	0.627907	0.052326	0.354651	0.709302	0.843023	0.988372	0.552326	0.421053	0.063953	0.30814	0.552326	0.72093	0.988372	0.412791
0.401575	0.23622	0.362205	0.198413	0.373016	0.142857	0.047244	0.267717	0.551181	0.748031	0.968504	0.015748	0.125984	0.519685	0.811024	1	0.007874	0.212598	0.425197	0.677165	0.976378	0.464567	0.496063	0.03937	0.15873	0.031746	0	0.007874	0.346457	0.614173	0.818898	1	0.015748	0.165354	0.362205	0.590551	0.905512	0.850394	0.850394	0.858268	0.866142	0.968504	0.354331	0.460317	0.015748	0.19685	0.409449	0.606299	0.976378	0.23622
0.428941	0.302326	0.268734	0.266839	0.256477	0.176166	0.005168	0.217054	0.457364	0.751938	0.994832	0.020672	0.299742	0.542636	0.77261	1	0.002584	0.224806	0.488372	0.726098	0.997416	0.364341	0.25323	0.382429	0.072539	0.072539	0.005181	0.002584	0.21447	0.403101	0.682171	1	0.142119	0.387597	0.503876	0.635659	0.899225	0.007752	0.22739	0.583979	0.873385	0.994832	0.475452	0.398964	0.01292	0.30491	0.534884	0.73385	0.989664	0.310078
0.412969	0.290102	0.296928	0.219178	0.267123	0.174658	0.010239	0.283276	0.542662	0.819113	0.989761	0.006826	0.276451	0.508532	0.672355	1	0.003413	0.1843	0.40273	0.679181	0.993174	0.518771	0.1843	0.296928	0.061644	0.054795	0	0.003413	0.34471	0.713311	0.843003	1	0.03413	0.197952	0.273038	0.52901	0.703072	0.09215	0.16041	0.416382	0.491468	0.921502	0.457338	0.390411	0.017065	0.194539	0.423208	0.610922	0.952218	0.317406
0.331915	0.310638	0.357447	0.213675	0.247863	0.230769	0.017021	0.251064	0.553191	0.791489	0.995745	0.008511	0.178723	0.429787	0.66383	0.931915	0.004255	0.297872	0.489362	0.73617	1	0.451064	0.323404	0.225532	0.106838	0.07265	0.004274	0.004255	0.208511	0.442553	0.634043	1	0.046809	0.187234	0.32766	0.570213	0.812766	0.025532	0.685106	0.851064	0.906383	0.974468	0.53617	0.34188	0.046809	0.27234	0.510638	0.731915	0.961702	0.33617
0.385757	0.25816	0.356083	0.181548	0.282738	0.181548	0.011869	0.204748	0.4273	0.694362	0.991098	0.005935	0.252226	0.519288	0.813056	0.997033	0.002967	0.267062	0.52819	0.724036	1	0.20178	0.089021	0.709199	0.041667	0.089286	0.005952	0.002967	0.237389	0.566766	0.777448	1	0.011869	0.181009	0.388724	0.747774	0.795252	0.017804	0.255193	0.492582	0.712166	0.991098	0.492582	0.464286	0.014837	0.278932	0.513353	0.750742	0.988131	0.195846
0.283784	0.418919	0.297297	0.273973	0.219178	0.205479	0.027027	0.148649	0.472973	0.662162	0.945946	0.054054	0.297297	0.513514	0.756757	1	0.013514	0.202703	0.459459	0.702703	0.986486	0.540541	0.418919	0.040541	0.136986	0	0.027397	0.013514	0.337838	0.581081	0.810811	1	0.027027	0.108108	0.27027	0.662162	0.891892	0.418919	0.418919	0.418919	0.432432	0.445946	0.391892	0.410959	0.054054	0.202703	0.391892	0.567568	0.905405	0.405405
0.375566	0.321267	0.303167	0.254545	0.25	0.227273	0.0181	0.244344	0.533937	0.733032	1	0.013575	0.221719	0.425339	0.78733	0.995475	0.004525	0.248869	0.502262	0.705882	0.972851	0.21267	0	0.78733	0	0.109091	0	0.004525	0.117647	0.660633	0.873303	1	0	0	0	0	0	0.022624	0.262443	0.470588	0.710407	0.945701	0.506787	0.381818	0.045249	0.271493	0.538462	0.746606	0.972851	0.348416
0.400947	0.318863	0.280189	0.237757	0.21485	0.195103	0.003946	0.201263	0.434886	0.710339	1	0.001579	0.273875	0.513812	0.737964	0.995264	0.000789	0.325967	0.575375	0.796369	0.993686	0.416732	0.1397	0.443567	0.047393	0.082148	0.00158	0.000789	0.265193	0.51618	0.766377	1	0.32281	0.468035	0.604578	0.895817	0.993686	0.003157	0.187845	0.410418	0.722968	0.973954	0.453039	0.322275	0.003157	0.384373	0.588792	0.793212	0.993686	0.343331
0.331307	0.410334	0.258359	0.323171	0.170732	0.246951	0.033435	0.346505	0.56535	0.787234	0.993921	0.006079	0.173252	0.413374	0.699088	1	0.00304	0.191489	0.510638	0.753799	0.969605	0.537994	0.221884	0.240122	0.088415	0.051829	0.003049	0.00304	0.243161	0.422492	0.723404	1	0.015198	0.288754	0.583587	0.756839	0.969605	0.036474	0.197568	0.504559	0.784195	0.927052	0.422492	0.353659	0.012158	0.164134	0.477204	0.75076	0.972644	0.43465
0.378531	0.378531	0.242938	0.244318	0.210227	0.181818	0.016949	0.231638	0.480226	0.757062	0.977401	0.011299	0.180791	0.474576	0.711864	1	0.00565	0.293785	0.508475	0.774011	0.99435	0.485876	0.265537	0.248588	0.090909	0.068182	0	0.00565	0.163842	0.474576	0.672316	1	0.175141	0.299435	0.559322	0.785311	0.99435	0.039548	0.333333	0.40678	0.830508	0.892655	0.536723	0.386364	0.028249	0.305085	0.514124	0.706215	0.983051	0.378531
0.369919	0.325203	0.304878	0.261224	0.24898	0.187755	0.00813	0.235772	0.54065	0.764228	1	0.020325	0.276423	0.52439	0.796748	0.98374	0.004065	0.227642	0.422764	0.646341	0.97561	0.296748	0.121951	0.581301	0.032653	0.097959	0	0.004065	0.162602	0.406504	0.654472	1	0.414634	0.735772	0.784553	0.813008	0.853659	0.01626	0.239837	0.487805	0.670732	0.99187	0.487805	0.35102	0.028455	0.235772	0.430894	0.654472	0.97561	0.292683
0.445652	0.206522	0.347826	0.175824	0.318681	0.153846	0.021739	0.206522	0.5	0.76087	1	0.119565	0.326087	0.554348	0.684783	0.891304	0.01087	0.195652	0.413043	0.73913	0.956522	0.423913	0.521739	0.054348	0.10989	0.021978	0.021978	0.01087	0.26087	0.48913	0.717391	1	0.065217	0.336957	0.521739	0.771739	0.978261	0.054348	0.054348	0.086957	0.097826	0.119565	0.369565	0.505495	0.065217	0.26087	0.478261	0.728261	0.967391	0.195652
0.326531	0.397959	0.27551	0.216495	0.103093	0.298969	0.030612	0.214286	0.367347	0.887755	1	0.020408	0.377551	0.55102	0.765306	0.979592	0.010204	0.153061	0.408163	0.612245	0.826531	0.591837	0.214286	0.193878	0.103093	0.061856	0	0.010204	0.27551	0.683673	0.846939	1	0.306122	0.346939	0.510204	0.591837	0.816327	0.122449	0.153061	0.204082	0.428571	0.673469	0.510204	0.247423	0.05102	0.326531	0.469388	0.673469	0.816327	0.326531
0.369309	0.323777	0.306914	0.214527	0.222973	0.190878	0.003373	0.165261	0.514334	0.777403	1	0.016863	0.252951	0.448567	0.733558	0.998314	0.001686	0.29511	0.49747	0.708263	0.989882	0.522766	0.150084	0.32715	0.052365	0.072635	0.005068	0.001686	0.129848	0.403035	0.76054	1	0.163575	0.413153	0.598651	0.718381	0.848229	0.145025	0.340641	0.509275	0.743676	0.920742	0.480607	0.320946	0.015177	0.303541	0.485666	0.706577	0.919056	0.367622
0.333503	0.322318	0.344179	0.20295	0.232452	0.231943	0.002034	0.23335	0.474835	0.738688	0.998475	0.001017	0.252161	0.516014	0.748856	1	0.000508	0.262837	0.513981	0.75089	0.999492	0.404677	0.149975	0.445348	0.055443	0.085961	0.003561	0.000508	0.222166	0.512456	0.759532	1	0.002542	0.316726	0.551093	0.770208	0.999492	0.005592	0.259786	0.459583	0.723945	0.930859	0.563803	0.375381	0.002542	0.279105	0.509405	0.744281	0.999492	0.341129
0.407855	0.29003	0.302115	0.22379	0.241935	0.169355	0.005035	0.283988	0.529708	0.767372	0.998993	0.002014	0.213494	0.48137	0.738167	0.997986	0.001007	0.248741	0.460222	0.736153	1	0.471299	0.145015	0.383686	0.063508	0.085685	0.001008	0.001007	0.260826	0.598187	0.826788	1	0.038268	0.240685	0.524673	0.803625	0.984894	0.014099	0.230614	0.407855	0.632427	0.992951	0.453172	0.395161	0.004028	0.209466	0.444109	0.673716	0.993958	0.328298
0.411111	0.244444	0.344444	0.213483	0.280899	0.202247	0.044444	0.211111	0.511111	0.733333	0.977778	0.022222	0.222222	0.5	0.744444	1	0.011111	0.233333	0.411111	0.7	0.988889	0.3	0.344444	0.355556	0.078652	0.033708	0.011236	0.011111	0.066667	0.177778	0.811111	1	0.088889	0.411111	0.733333	0.888889	0.977778	0.188889	0.266667	0.5	0.588889	0.677778	0.444444	0.404494	0.033333	0.266667	0.433333	0.711111	0.955556	0.255556
0.339568	0.464748	0.195683	0.29683	0.131124	0.164265	0.002878	0.22446	0.428777	0.738129	1	0.007194	0.240288	0.502158	0.741007	0.997122	0.001439	0.352518	0.604317	0.784173	0.992806	0.697842	0.096403	0.205755	0.063401	0.060519	0.005764	0.001439	0.21295	0.456115	0.732374	1	0.053237	0.243165	0.506475	0.782734	0.98705	0.035971	0.348201	0.633094	0.811511	0.974101	0.368345	0.345821	0.025899	0.27482	0.582734	0.771223	0.992806	0.433094
0.321053	0.373684	0.305263	0.253968	0.216931	0.222222	0.015789	0.189474	0.484211	0.757895	1	0.010526	0.263158	0.531579	0.784211	0.984211	0.005263	0.242105	0.473684	0.678947	0.994737	0.310526	0.031579	0.657895	0.010582	0.126984	0	0.005263	0.236842	0.531579	0.863158	1	0.968421	0.968421	0.978947	0.984211	0.994737	0.047368	0.221053	0.473684	0.684211	0.915789	0.521053	0.412698	0.042105	0.294737	0.5	0.694737	0.994737	0.415789
0.346883	0.298103	0.355014	0.195652	0.282609	0.206522	0.02981	0.243902	0.533875	0.791328	0.99729	0.00542	0.257453	0.452575	0.728997	0.98645	0.00271	0.230352	0.517615	0.750678	1	0.368564	0.214092	0.417344	0.076087	0.081522	0	0.00271	0.284553	0.479675	0.804878	1	0.01084	0.186992	0.382114	0.528455	0.99187	0.04878	0.243902	0.590786	0.775068	0.98374	0.604336	0.413043	0.01084	0.271003	0.495935	0.734417	0.99458	0.306233
0.424125	0.202335	0.373541	0.175781	0.304688	0.152344	0.015564	0.249027	0.529183	0.758755	1	0.007782	0.159533	0.44358	0.642023	0.941634	0.003891	0.264591	0.501946	0.77821	0.980545	0.463035	0.307393	0.229572	0.125	0.054688	0	0.003891	0.284047	0.509728	0.747082	1	0.11284	0.229572	0.451362	0.715953	0.902724	0.007782	0.077821	0.494163	0.77821	0.953307	0.486381	0.40625	0.019455	0.303502	0.486381	0.743191	0.961089	0.217899
0.512465	0.3241	0.163435	0.297222	0.152778	0.091667	0.019391	0.32964	0.559557	0.792244	0.98892	0.00554	0.185596	0.33795	0.587258	0.99446	0.00277	0.315789	0.567867	0.781163	1	0.401662	0.027701	0.570637	0.011111	0.072222	0	0.00277	0.157895	0.288089	0.534626	1	0.548476	0.551247	0.559557	0.565097	0.781163	0.01108	0.385042	0.65928	0.828255	0.98892	0.174515	0.255556	0.01108	0.32133	0.65374	0.775623	0.99169	0.34349
0.295082	0.472131	0.232787	0.223684	0.190789	0.180921	0.013115	0.2	0.367213	0.580328	0.993443	0.006557	0.390164	0.652459	0.829508	1	0.003279	0.134426	0.380328	0.645902	0.996721	0.691803	0.098361	0.209836	0.039474	0.072368	0	0.003279	0.321311	0.514754	0.740984	1	0.013115	0.101639	0.134426	0.213115	0.354098	0.052459	0.163934	0.609836	0.84918	0.95082	0.468852	0.440789	0.009836	0.285246	0.531148	0.72459	0.937705	0.47541
0.316667	0.35	0.333333	0.226891	0.226891	0.260504	0.05	0.216667	0.508333	0.733333	0.991667	0.025	0.266667	0.483333	0.741667	0.983333	0.008333	0.241667	0.458333	0.725	1	0.383333	0.166667	0.45	0.05042	0.084034	0	0.008333	0.183333	0.341667	0.691667	1	0.233333	0.266667	0.4	0.7	0.741667	0.033333	0.458333	0.583333	0.85	0.966667	0.491667	0.369748	0.05	0.375	0.525	0.725	0.966667	0.391667
0.445545	0.277228	0.277228	0.25	0.26	0.11	0.019802	0.247525	0.534653	0.772277	1	0.029703	0.277228	0.435644	0.663366	0.980198	0.009901	0.217822	0.425743	0.752475	0.910891	0.366337	0.306931	0.326733	0.11	0.05	0.01	0.009901	0.326733	0.475248	0.80198	1	0.039604	0.09901	0.49505	0.623762	0.920792	0.158416	0.227723	0.306931	0.752475	0.871287	0.475248	0.42	0.039604	0.227723	0.49505	0.722772	0.930693	0.29703
0.369748	0.302521	0.327731	0.211864	0.254237	0.177966	0.033613	0.252101	0.529412	0.689076	1	0.016807	0.201681	0.403361	0.705882	0.966387	0.008403	0.277311	0.554622	0.789916	0.983193	0.352941	0.151261	0.495798	0.042373	0.076271	0.008475	0.008403	0.084034	0.285714	0.420168	1	0.310924	0.336134	0.453782	0.756303	0.798319	0.109244	0.487395	0.613445	0.848739	0.983193	0.462185	0.355932	0.058824	0.361345	0.579832	0.764706	0.983193	0.294118
0.365546	0.323529	0.310924	0.227848	0.223629	0.244726	0.008403	0.210084	0.462185	0.773109	1	0.021008	0.260504	0.487395	0.747899	0.991597	0.004202	0.252101	0.508403	0.722689	0.987395	0.420168	0.168067	0.411765	0.075949	0.059072	0	0.004202	0.344538	0.554622	0.710084	1	0.205882	0.352941	0.453782	0.647059	0.739496	0.029412	0.12605	0.466387	0.815126	0.983193	0.470588	0.455696	0.029412	0.285714	0.512605	0.714286	0.966387	0.323529
0.345397	0.398899	0.255704	0.258268	0.174803	0.219685	0.001574	0.250197	0.442958	0.804091	0.998426	0.00236	0.270653	0.536585	0.734854	1	0.000787	0.203777	0.488592	0.704957	0.993706	0.70417	0.060582	0.235248	0.037795	0.059843	0.00315	0.000787	0.338316	0.594807	0.795437	1	0.04878	0.399685	0.449253	0.641227	0.994493	0.001574	0.087333	0.20535	0.390244	0.976397	0.40834	0.370079	0.00236	0.284815	0.535012	0.738788	0.993706	0.422502
0.286371	0.502297	0.211332	0.216258	0.130368	0.187117	0.009188	0.165391	0.349158	0.575804	0.996937	0.003063	0.385911	0.601838	0.784074	1	0.001531	0.229709	0.41807	0.727412	0.993874	0.75804	0.056662	0.185299	0.027607	0.030675	0.003067	0.001531	0.304747	0.578867	0.784074	1	0.047473	0.211332	0.266462	0.316998	0.709035	0.070444	0.160796	0.333844	0.477795	0.911179	0.431853	0.328221	0.01072	0.267994	0.520674	0.686064	0.993874	0.513017
0.322353	0.409412	0.268235	0.231132	0.188679	0.233491	0.018824	0.228235	0.435294	0.651765	0.990588	0.004706	0.329412	0.595294	0.837647	1	0.002353	0.188235	0.454118	0.687059	0.976471	0.644706	0.129412	0.225882	0.049528	0.063679	0.007075	0.002353	0.331765	0.569412	0.830588	1	0.051765	0.112941	0.390588	0.621176	0.710588	0.056471	0.228235	0.317647	0.576471	0.974118	0.529412	0.34434	0.023529	0.263529	0.583529	0.825882	0.985882	0.444706
0.394444	0.298148	0.307407	0.250464	0.261596	0.165121	0.003704	0.233333	0.501852	0.737037	0.998148	0.009259	0.322222	0.572222	0.848148	0.987037	0.001852	0.212963	0.438889	0.644444	1	0.405556	0.207407	0.387037	0.064935	0.068646	0.001855	0.001852	0.314815	0.590741	0.881481	1	0.094444	0.27963	0.374074	0.52963	0.944444	0.012963	0.216667	0.507407	0.709259	0.848148	0.446296	0.378479	0.009259	0.27037	0.464815	0.644444	0.994444	0.346296
0.345638	0.295302	0.35906	0.198653	0.259259	0.239057	0.013423	0.234899	0.432886	0.758389	0.989933	0.026846	0.244966	0.567114	0.738255	0.996644	0.003356	0.241611	0.483221	0.721477	1	0.392617	0.157718	0.449664	0.057239	0.117845	0.003367	0.003356	0.174497	0.419463	0.684564	1	0.010067	0.268456	0.442953	0.637584	0.721477	0.026846	0.298658	0.536913	0.828859	0.989933	0.54698	0.397306	0.006711	0.244966	0.473154	0.671141	0.983221	0.332215
0.416	0.3072	0.2768	0.25641	0.221154	0.189103	0.0048	0.2	0.4304	0.6704	0.9984	0.0032	0.2768	0.6032	0.8192	0.9968	0.0016	0.3152	0.5264	0.7376	1	0.5104	0.1616	0.328	0.070513	0.048077	0	0.0016	0.1936	0.4048	0.7904	1	0.0912	0.2816	0.7872	0.8784	0.992	0.0144	0.3472	0.4976	0.5792	0.7088	0.4192	0.394231	0.0096	0.3424	0.5968	0.8096	0.9968	0.3648
0.289855	0.415459	0.294686	0.228155	0.126214	0.276699	0.043478	0.323671	0.560386	0.768116	1	0.009662	0.207729	0.42029	0.714976	0.995169	0.004831	0.193237	0.512077	0.710145	0.971014	0.565217	0.256039	0.178744	0.097087	0.038835	0.009709	0.004831	0.154589	0.362319	0.550725	1	0.024155	0.275362	0.657005	0.772947	0.966184	0.415459	0.57971	0.623188	0.884058	0.980676	0.468599	0.407767	0.024155	0.275362	0.497585	0.772947	0.971014	0.449275
0.368421	0.245614	0.385965	0.132743	0.318584	0.185841	0.026316	0.201754	0.5	0.649123	1	0.04386	0.298246	0.508772	0.807018	0.991228	0.008772	0.245614	0.447368	0.754386	0.95614	0.385965	0.166667	0.447368	0.053097	0.106195	0	0.008772	0.114035	0.350877	0.710526	1	0.280702	0.307018	0.412281	0.45614	0.780702	0.078947	0.473684	0.605263	0.868421	0.982456	0.45614	0.353982	0.052632	0.333333	0.561404	0.754386	0.982456	0.201754
0.336134	0.386555	0.277311	0.20339	0.152542	0.245763	0.016807	0.159664	0.378151	0.638655	0.991597	0.05042	0.302521	0.605042	0.798319	1	0.008403	0.218487	0.462185	0.697479	0.97479	0.403361	0.168067	0.428571	0.067797	0.067797	0	0.008403	0.176471	0.336134	0.689076	1	0.033613	0.226891	0.394958	0.436975	0.747899	0.067227	0.487395	0.596639	0.87395	0.983193	0.453782	0.355932	0.033613	0.386555	0.537815	0.731092	0.97479	0.403361
0.421505	0.337634	0.24086	0.297414	0.252155	0.155172	0.006452	0.27957	0.546237	0.744086	1	0.004301	0.24086	0.462366	0.812903	0.997849	0.002151	0.206452	0.445161	0.675269	0.888172	0.376344	0.139785	0.483871	0.034483	0.077586	0	0.002151	0.253763	0.470968	0.898925	1	0.008602	0.227957	0.275269	0.387097	0.494624	0.043011	0.296774	0.595699	0.746237	0.931183	0.372043	0.49569	0.008602	0.227957	0.453763	0.713978	0.980645	0.36129
0.485327	0.24605	0.268623	0.210407	0.223982	0.153846	0.004515	0.27991	0.474041	0.659142	0.997743	0.018059	0.227991	0.553047	0.812641	1	0.002257	0.187359	0.514673	0.808126	0.988713	0.638826	0.158014	0.20316	0.074661	0.061086	0.002262	0.002257	0.295711	0.476298	0.668172	1	0.013544	0.137698	0.512415	0.873589	0.977427	0.065463	0.17833	0.670429	0.767494	0.943567	0.525959	0.38009	0.011287	0.320542	0.512415	0.690745	0.975169	0.21219
0.375172	0.308966	0.315862	0.208564	0.243094	0.214088	0.004138	0.224828	0.526897	0.783448	1	0.002759	0.296552	0.503448	0.73931	0.995862	0.001379	0.216552	0.467586	0.704828	0.997241	0.475862	0.350345	0.173793	0.13674	0.029006	0.001381	0.001379	0.21931	0.422069	0.692414	1	0.004138	0.325517	0.517241	0.675862	0.995862	0.033103	0.147586	0.882759	0.928276	0.987586	0.49931	0.375691	0.008276	0.277241	0.503448	0.724138	0.997241	0.33931
0.373344	0.31043	0.316225	0.195526	0.243579	0.203811	0.001656	0.24255	0.514073	0.695364	0.999172	0.002483	0.286424	0.53394	0.816225	0.998344	0.000828	0.235099	0.444536	0.733444	1	0.428808	0.086093	0.485099	0.033969	0.075394	0.0058	0.000828	0.264901	0.53394	0.835265	1	0.00745	0.235927	0.299669	0.509934	0.961921	0.005795	0.196192	0.499172	0.698675	0.976821	0.419702	0.404308	0.003311	0.226821	0.418874	0.711093	0.997517	0.332781
0.56	0.24	0.2	0.306122	0.163265	0.102041	0.06	0.28	0.62	0.8	1	0.04	0.14	0.4	0.6	0.96	0.02	0.24	0.5	0.54	0.86	0.62	0.1	0.28	0.040816	0.081633	0	0.02	0.34	0.6	0.84	1	0.48	0.48	0.5	0.52	0.56	0.12	0.16	0.24	0.3	0.7	0.24	0.244898	0.24	0.44	0.5	0.56	0.86	0.28
0.294671	0.46395	0.241379	0.27044	0.147799	0.213836	0.009404	0.188088	0.470219	0.717868	1	0.00627	0.200627	0.45768	0.755486	0.996865	0.003135	0.360502	0.570533	0.777429	0.978056	0.489028	0.153605	0.357367	0.044025	0.069182	0	0.003135	0.122257	0.341693	0.69906	1	0.275862	0.423197	0.485893	0.658307	0.739812	0.184953	0.369906	0.586207	0.830721	0.968652	0.485893	0.358491	0.012539	0.322884	0.526646	0.702194	0.968652	0.460815
0.47619	0.238095	0.285714	0.240385	0.269231	0.163462	0.038095	0.171429	0.352381	0.666667	1	0.133333	0.361905	0.638095	0.790476	0.961905	0.009524	0.333333	0.52381	0.761905	0.980952	0.533333	0.133333	0.333333	0.067308	0.105769	0.009615	0.009524	0.161905	0.333333	0.647619	1	0.180952	0.2	0.409524	0.495238	0.685714	0.066667	0.571429	0.790476	0.87619	0.971429	0.333333	0.365385	0.028571	0.495238	0.657143	0.857143	0.980952	0.27619
0.35473	0.572635	0.072635	0.351946	0.05753	0.052453	0.005068	0.233108	0.447635	0.689189	0.996622	0.003378	0.228041	0.552365	0.790541	1	0.001689	0.407095	0.486486	0.548986	0.974662	0.902027	0.050676	0.047297	0.027073	0.013536	0	0.001689	0.239865	0.547297	0.773649	1	0.059122	0.403716	0.461149	0.488176	0.628378	0.14527	0.157095	0.427365	0.5	0.511824	0.570946	0.368866	0.011824	0.293919	0.554054	0.798986	0.996622	0.569257
0.388102	0.380548	0.23135	0.258034	0.175803	0.180529	0.003777	0.189802	0.527856	0.76865	1	0.007554	0.282342	0.450425	0.699717	0.997167	0.000944	0.309726	0.538244	0.759207	0.998111	0.654391	0.081209	0.2644	0.038752	0.067108	0.004726	0.000944	0.255902	0.444759	0.685552	1	0.082153	0.422096	0.580737	0.858357	0.964117	0.005666	0.128423	0.647781	0.786591	0.990557	0.341832	0.347826	0.002833	0.325779	0.552408	0.783758	0.983003	0.413598
0.316857	0.290241	0.392902	0.182741	0.27665	0.248731	0.002535	0.268695	0.52218	0.754119	0.997465	0.00507	0.226869	0.484157	0.740177	0.998733	0.001267	0.253485	0.498099	0.742712	1	0.463878	0.240811	0.295311	0.098985	0.060914	0.002538	0.001267	0.206591	0.447402	0.746515	1	0.03929	0.200253	0.423321	0.797212	0.997465	0.006337	0.323194	0.542459	0.700887	0.989861	0.57161	0.385787	0.003802	0.268695	0.47782	0.740177	0.996198	0.342205
0.345133	0.510324	0.144543	0.322485	0.076923	0.180473	0.014749	0.20059	0.380531	0.59882	1	0.011799	0.315634	0.572271	0.766962	0.9941	0.00295	0.292035	0.557522	0.80236	0.985251	0.935103	0.020649	0.044248	0.023669	0.04142	0	0.00295	0.265487	0.519174	0.755162	1	0.032448	0.032448	0.132743	0.442478	0.852507	0.20059	0.20649	0.218289	0.410029	0.973451	0.233038	0.337278	0.00885	0.433628	0.690265	0.855457	0.982301	0.466077
0.349495	0.278788	0.371717	0.15587	0.299595	0.228745	0.010101	0.248485	0.50101	0.727273	1	0.00404	0.286869	0.507071	0.737374	0.989899	0.00202	0.218182	0.472727	0.761616	0.983838	0.375758	0.131313	0.492929	0.05668	0.076923	0.016194	0.00202	0.171717	0.482828	0.729293	1	0.084848	0.319192	0.571717	0.670707	0.937374	0.008081	0.244444	0.474747	0.761616	0.975758	0.547475	0.437247	0.008081	0.270707	0.50101	0.739394	0.985859	0.292929
0.375	0.291667	0.333333	0.221053	0.305263	0.178947	0.020833	0.260417	0.5	0.6875	0.979167	0.03125	0.1875	0.479167	0.791667	0.989583	0.010417	0.229167	0.489583	0.739583	1	0.4375	0.302083	0.260417	0.126316	0.063158	0	0.010417	0.239583	0.635417	0.78125	1	0.260417	0.520833	0.59375	0.822917	0.958333	0.03125	0.145833	0.208333	0.416667	0.489583	0.375	0.442105	0.041667	0.208333	0.479167	0.75	0.96875	0.302083
0.304348	0.347826	0.347826	0.208791	0.208791	0.21978	0.043478	0.326087	0.586957	0.771739	0.978261	0.021739	0.184783	0.423913	0.630435	1	0.01087	0.25	0.532609	0.728261	0.98913	0.347826	0.347826	0.304348	0.10989	0.043956	0	0.01087	0.130435	0.597826	0.804348	1	0.054348	0.369565	0.695652	0.891304	0.978261	0.152174	0.217391	0.434783	0.51087	0.586957	0.576087	0.307692	0.054348	0.206522	0.413043	0.597826	0.967391	0.369565
0.324324	0.388514	0.287162	0.240678	0.166102	0.264407	0.006757	0.287162	0.513514	0.790541	0.996622	0.013514	0.209459	0.476351	0.739865	1	0.003378	0.253378	0.5	0.682432	0.989865	0.432432	0.158784	0.408784	0.047458	0.088136	0	0.003378	0.148649	0.432432	0.709459	1	0.219595	0.310811	0.452703	0.648649	0.733108	0.074324	0.273649	0.533784	0.824324	0.976351	0.527027	0.359322	0.013514	0.27027	0.486486	0.685811	0.966216	0.429054
0.387234	0.306383	0.306383	0.260684	0.269231	0.153846	0.012766	0.26383	0.519149	0.748936	0.982979	0.008511	0.246809	0.382979	0.723404	1	0.004255	0.174468	0.53617	0.761702	0.991489	0.540426	0.148936	0.310638	0.094017	0.068376	0	0.004255	0.259574	0.404255	0.73617	1	0.012766	0.06383	0.531915	0.757447	0.987234	0.089362	0.187234	0.578723	0.795745	0.957447	0.519149	0.358974	0.017021	0.319149	0.502128	0.753191	0.991489	0.32766
0.364583	0.354167	0.28125	0.263158	0.242105	0.189474	0.03125	0.21875	0.416667	0.677083	0.958333	0.020833	0.270833	0.5625	0.770833	1	0.010417	0.197917	0.40625	0.697917	0.947917	0.239583	0	0.760417	0	0.063158	0	0.010417	0.4375	0.708333	0.9375	1	0	0	0	0	0	0.052083	0.229167	0.416667	0.635417	0.90625	0.3125	0.463158	0.072917	0.25	0.53125	0.697917	0.947917	0.34375
0.386364	0.375	0.238636	0.275862	0.137931	0.218391	0.045455	0.215909	0.511364	0.738636	0.943182	0.022727	0.147727	0.443182	0.715909	1	0.011364	0.261364	0.431818	0.681818	0.988636	0.568182	0.045455	0.386364	0.045977	0.068966	0	0.011364	0.136364	0.318182	0.556818	1	0.284091	0.284091	0.295455	0.306818	0.5	0.352273	0.431818	0.704545	0.795455	0.965909	0.363636	0.436782	0.181818	0.375	0.602273	0.772727	0.988636	0.420455
0.277978	0.415162	0.306859	0.210145	0.166667	0.257246	0.025271	0.202166	0.512635	0.758123	0.99639	0.00722	0.245487	0.458484	0.700361	1	0.00361	0.281588	0.505415	0.740072	0.99278	0.422383	0.169675	0.407942	0.050725	0.072464	0	0.00361	0.184116	0.429603	0.700361	1	0.216606	0.314079	0.447653	0.65343	0.743682	0.054152	0.270758	0.537906	0.833935	0.99278	0.541516	0.376812	0.061372	0.285199	0.490975	0.689531	0.99278	0.436823
0.411765	0.323529	0.264706	0.237037	0.214815	0.162963	0.029412	0.242647	0.544118	0.772059	1	0.014706	0.220588	0.514706	0.779412	0.955882	0.007353	0.264706	0.404412	0.683824	0.926471	0.441176	0.191176	0.367647	0.051852	0.081481	0.022222	0.007353	0.220588	0.705882	0.830882	1	0.154412	0.191176	0.676471	0.889706	0.941176	0.029412	0.25	0.375	0.5	0.639706	0.433824	0.444444	0.051471	0.294118	0.514706	0.742647	0.926471	0.323529
0.455172	0.282759	0.262069	0.236111	0.243056	0.194444	0.02069	0.296552	0.641379	0.834483	1	0.013793	0.241379	0.4	0.593103	0.924138	0.006897	0.172414	0.386207	0.586207	0.965517	0.475862	0.282759	0.241379	0.097222	0.083333	0	0.006897	0.241379	0.510345	0.751724	1	0.144828	0.227586	0.365517	0.434483	0.772414	0.075862	0.606897	0.668966	0.889655	0.972414	0.317241	0.375	0.034483	0.227586	0.386207	0.551724	0.965517	0.296552
0.3125	0.34375	0.34375	0.231579	0.210526	0.263158	0.0625	0.291667	0.520833	0.770833	0.958333	0.020833	0.1875	0.489583	0.739583	1	0.010417	0.239583	0.46875	0.645833	0.979167	0.489583	0.385417	0.125	0.115789	0.052632	0.010526	0.010417	0.40625	0.75	0.875	1	0.125	0.25	0.447917	0.614583	0.739583	0.03125	0.052083	0.083333	0.333333	0.364583	0.541667	0.336842	0.052083	0.270833	0.416667	0.65625	0.979167	0.375
0.328904	0.328904	0.342193	0.203333	0.25	0.216667	0.023256	0.252492	0.451827	0.780731	0.993355	0.009967	0.196013	0.481728	0.727575	0.990033	0.003322	0.259136	0.531561	0.754153	1	0.375415	0.17608	0.448505	0.053333	0.106667	0	0.003322	0.212625	0.461794	0.717608	1	0.149502	0.302326	0.481728	0.677741	0.767442	0.013289	0.252492	0.541528	0.843854	0.996678	0.548173	0.426667	0.006645	0.23588	0.498339	0.684385	0.990033	0.328904
0.385496	0.299618	0.314885	0.223709	0.240918	0.189293	0.01145	0.209924	0.398855	0.688931	1	0.003817	0.354962	0.597328	0.79771	0.998092	0.001908	0.221374	0.5	0.721374	0.996183	0.183206	0.05916	0.757634	0.021033	0.059273	0.001912	0.001908	0.480916	0.688931	0.826336	1	0.410305	0.437023	0.492366	0.912214	0.984733	0.005725	0.192748	0.387405	0.69084	0.996183	0.486641	0.413002	0.005725	0.377863	0.593511	0.782443	0.992366	0.30916
0.401961	0.284314	0.313725	0.267327	0.306931	0.138614	0.039216	0.333333	0.54902	0.715686	0.980392	0.019608	0.186275	0.401961	0.794118	1	0.009804	0.205882	0.431373	0.656863	0.931373	0.411765	0.303922	0.284314	0.079208	0.039604	0	0.009804	0.127451	0.588235	0.794118	1	0.078431	0.362745	0.656863	0.852941	0.931373	0.156863	0.215686	0.284314	0.480392	0.558824	0.529412	0.29703	0.029412	0.205882	0.401961	0.568627	0.931373	0.323529
0.39759	0.361446	0.240964	0.304878	0.170732	0.231707	0.048193	0.253012	0.506024	0.710843	1	0.024096	0.180723	0.421687	0.662651	0.987952	0.012048	0.301205	0.481928	0.795181	0.975904	0.554217	0.120482	0.325301	0.073171	0.04878	0	0.012048	0.13253	0.373494	0.626506	1	0.180723	0.192771	0.313253	0.337349	0.566265	0.39759	0.457831	0.722892	0.807229	0.891566	0.349398	0.365854	0.192771	0.39759	0.566265	0.795181	0.927711	0.385542
0.346304	0.451362	0.202335	0.269531	0.140625	0.167969	0.011673	0.256809	0.490272	0.766537	1	0.007782	0.303502	0.548638	0.801556	0.996109	0.003891	0.124514	0.420233	0.603113	0.856031	0.470817	0.151751	0.377432	0.070312	0.085938	0	0.003891	0.29572	0.513619	0.836576	1	0.015564	0.124514	0.175097	0.276265	0.828794	0.062257	0.412451	0.622568	0.731518	0.980545	0.396887	0.335938	0.019455	0.206226	0.420233	0.634241	0.964981	0.466926
0.313433	0.380597	0.30597	0.233083	0.18797	0.157895	0.037313	0.238806	0.567164	0.761194	0.985075	0.029851	0.261194	0.440299	0.649254	0.977612	0.007463	0.179104	0.514925	0.738806	1	0.574627	0.350746	0.074627	0.225564	0.030075	0	0.007463	0.261194	0.477612	0.746269	1	0.014925	0.149254	0.410448	0.604478	0.992537	0.873134	0.880597	0.925373	0.940299	0.962687	0.5	0.345865	0.044776	0.253731	0.552239	0.738806	0.970149	0.425373
0.366038	0.29434	0.339623	0.212121	0.280303	0.185606	0.007547	0.286792	0.554717	0.830189	0.996226	0.05283	0.207547	0.479245	0.675472	1	0.003774	0.241509	0.449057	0.686792	0.962264	0.498113	0.301887	0.2	0.109848	0.056818	0.003788	0.003774	0.241509	0.479245	0.728302	1	0.011321	0.154717	0.283019	0.501887	0.909434	0.354717	0.649057	0.769811	0.826415	0.958491	0.516981	0.340909	0.015094	0.233962	0.456604	0.675472	0.962264	0.324528
0.309859	0.380282	0.309859	0.2	0.257143	0.214286	0.028169	0.211268	0.535211	0.859155	0.985915	0.056338	0.267606	0.521127	0.661972	1	0.014085	0.169014	0.43662	0.591549	0.887324	0.549296	0.323944	0.126761	0.142857	0.028571	0	0.014085	0.126761	0.408451	0.661972	1	0.15493	0.211268	0.422535	0.605634	0.774648	0.830986	0.84507	0.873239	0.901408	0.943662	0.366197	0.428571	0.070423	0.225352	0.492958	0.605634	0.943662	0.394366
0.321918	0.424658	0.253425	0.282759	0.165517	0.255172	0.020548	0.191781	0.506849	0.753425	1	0.013699	0.267123	0.493151	0.746575	0.965753	0.006849	0.253425	0.417808	0.657534	0.945205	0.527397	0.287671	0.184932	0.096552	0.027586	0	0.006849	0.130137	0.452055	0.746575	1	0.150685	0.253425	0.349315	0.684932	0.883562	0.527397	0.561644	0.609589	0.767123	0.815068	0.445205	0.344828	0.034247	0.328767	0.520548	0.719178	0.945205	0.431507
0.310087	0.315068	0.374844	0.190773	0.269327	0.24813	0.002491	0.234122	0.486924	0.740971	1	0.004981	0.265255	0.499377	0.752179	0.996264	0.001245	0.250311	0.496887	0.742217	0.998755	0.466999	0.242839	0.290162	0.100998	0.05611	0.003741	0.001245	0.231631	0.460772	0.737235	1	0.038605	0.200498	0.420922	0.803238	0.998755	0.006227	0.32005	0.542964	0.703611	0.992528	0.570361	0.408978	0.003736	0.255293	0.473225	0.726027	0.998755	0.303861
0.434211	0.25	0.315789	0.205298	0.304636	0.165563	0.013158	0.276316	0.460526	0.684211	1	0.085526	0.256579	0.552632	0.769737	0.986842	0.006579	0.164474	0.539474	0.796053	0.993421	0.355263	0.315789	0.328947	0.13245	0.05298	0.013245	0.006579	0.144737	0.552632	0.763158	1	0.013158	0.243421	0.605263	0.868421	0.967105	0.059211	0.309211	0.394737	0.473684	0.802632	0.375	0.450331	0.019737	0.197368	0.506579	0.723684	0.953947	0.263158
0.319088	0.413105	0.267806	0.205714	0.182857	0.222857	0.017094	0.299145	0.501425	0.672365	0.980057	0.005698	0.262108	0.509972	0.792023	0.991453	0.002849	0.19943	0.444444	0.698006	1	0.723647	0.193732	0.082621	0.085714	0.034286	0.005714	0.002849	0.296296	0.561254	0.777778	1	0.079772	0.148148	0.267806	0.358974	0.917379	0.008547	0.45584	0.481481	0.940171	0.962963	0.452991	0.308571	0.014245	0.239316	0.501425	0.774929	0.982906	0.421652
0.341667	0.333333	0.325	0.193277	0.193277	0.285714	0.016667	0.216667	0.5	0.641667	0.991667	0.033333	0.208333	0.433333	0.8	1	0.008333	0.275	0.533333	0.725	0.966667	0.416667	0.208333	0.375	0.092437	0.07563	0.008403	0.008333	0.208333	0.458333	0.791667	1	0.041667	0.225	0.308333	0.416667	0.741667	0.133333	0.483333	0.575	0.783333	0.908333	0.441667	0.352941	0.05	0.316667	0.516667	0.708333	0.966667	0.333333
0.359712	0.359712	0.280576	0.217391	0.173913	0.224638	0.021583	0.338129	0.546763	0.741007	0.971223	0.014388	0.194245	0.410072	0.784173	1	0.007194	0.23741	0.467626	0.697842	0.992806	0.47482	0.129496	0.395683	0.057971	0.072464	0	0.007194	0.208633	0.553957	0.863309	1	0.230216	0.251799	0.345324	0.618705	0.913669	0.057554	0.165468	0.496403	0.748201	0.848921	0.417266	0.362319	0.028777	0.258993	0.467626	0.640288	0.964029	0.338129
0.34126	0.311534	0.347206	0.211905	0.264286	0.213095	0.003567	0.248514	0.483948	0.751486	0.995244	0.002378	0.241379	0.543401	0.776457	1	0.001189	0.250892	0.48038	0.709869	0.998811	0.454221	0.197384	0.348395	0.080952	0.085714	0.007143	0.001189	0.24019	0.487515	0.740785	1	0.005945	0.210464	0.428062	0.812128	0.902497	0.070155	0.262782	0.551724	0.758621	0.997622	0.521998	0.457143	0.004756	0.239001	0.488704	0.760999	0.998811	0.323424
0.428115	0.364217	0.207668	0.298077	0.189103	0.141026	0.01278	0.300319	0.635783	0.837061	0.996805	0.00639	0.246006	0.447284	0.626198	1	0.003195	0.146965	0.345048	0.642173	0.926518	0.635783	0.118211	0.246006	0.057692	0.051282	0	0.003195	0.313099	0.511182	0.821086	1	0.054313	0.140575	0.175719	0.261981	0.830671	0.095847	0.217252	0.629393	0.690096	0.923323	0.316294	0.333333	0.015974	0.175719	0.399361	0.495208	0.926518	0.434505
0.314961	0.370079	0.314961	0.261905	0.222222	0.206349	0.015748	0.228346	0.456693	0.732283	1	0.007874	0.173228	0.488189	0.740157	0.992126	0.031496	0.267717	0.527559	0.80315	0.984252	0.393701	0.322835	0.283465	0.111111	0.063492	0.015873	0.007874	0.370079	0.559055	0.748031	1	0.023622	0.322835	0.511811	0.700787	0.952756	0.07874	0.141732	0.212598	0.779528	0.858268	0.472441	0.47619	0.031496	0.283465	0.566929	0.740157	0.968504	0.409449
0.379705	0.333879	0.286416	0.211475	0.213115	0.185246	0.00982	0.247136	0.479542	0.728314	1	0.003273	0.237316	0.513912	0.782324	0.99509	0.001637	0.256956	0.500818	0.736498	0.996727	0.481178	0.212766	0.306056	0.091803	0.068852	0.003279	0.001637	0.212766	0.479542	0.746318	1	0.006547	0.201309	0.404255	0.649755	0.944354	0.070376	0.376432	0.585925	0.833061	0.991817	0.443535	0.337705	0.006547	0.268412	0.543372	0.762684	0.996727	0.322422
0.385396	0.273834	0.340771	0.207317	0.26626	0.191057	0.008114	0.247465	0.488844	0.758621	1	0.004057	0.245436	0.541582	0.74645	0.991886	0.002028	0.237323	0.470588	0.724138	0.98783	0.25355	0.083164	0.663286	0.026423	0.067073	0.006098	0.002028	0.383367	0.647059	0.805274	1	0.320487	0.375254	0.444219	0.965517	0.98783	0.008114	0.180527	0.466531	0.669371	0.945233	0.51927	0.426829	0.010142	0.31643	0.541582	0.760649	0.98783	0.281947
0.385827	0.333071	0.281102	0.257683	0.22695	0.193065	0.007087	0.251181	0.491339	0.740157	1	0.001575	0.233071	0.514961	0.751969	0.998425	0.000787	0.258268	0.500787	0.751181	0.99685	0.414173	0.192126	0.393701	0.081166	0.08747	0.00394	0.000787	0.229921	0.520472	0.774803	1	0.00315	0.211024	0.43622	0.689764	0.969291	0.007087	0.284252	0.508661	0.755906	0.985039	0.414961	0.49015	0.00315	0.252756	0.50315	0.759843	0.99685	0.351969
0.363484	0.353434	0.283082	0.278523	0.209732	0.191275	0.0067	0.281407	0.561139	0.777219	1	0.00335	0.18258	0.450586	0.720268	0.99665	0.001675	0.283082	0.470687	0.703518	0.9866	0.467337	0.142379	0.390285	0.055369	0.075503	0.005034	0.001675	0.20268	0.561139	0.772194	1	0.0067	0.288107	0.440536	0.631491	0.931323	0.033501	0.266332	0.497487	0.785595	0.917923	0.472362	0.33557	0.011725	0.229481	0.440536	0.676717	0.9866	0.370184
0.302752	0.426606	0.270642	0.225806	0.179724	0.207373	0.009174	0.169725	0.449541	0.747706	0.958716	0.018349	0.238532	0.444954	0.711009	0.995413	0.004587	0.334862	0.56422	0.793578	1	0.582569	0.256881	0.16055	0.078341	0.032258	0.004608	0.004587	0.233945	0.440367	0.738532	1	0.266055	0.472477	0.573394	0.83945	0.940367	0.12844	0.16055	0.201835	0.637615	0.889908	0.46789	0.35023	0.142202	0.330275	0.573394	0.770642	0.990826	0.444954
0.447368	0.245614	0.307018	0.274336	0.274336	0.123894	0.017544	0.22807	0.54386	0.72807	0.991228	0.026316	0.245614	0.508772	0.824561	1	0.008772	0.219298	0.385965	0.692982	0.95614	0.403509	0.245614	0.350877	0.088496	0.070796	0	0.008772	0.201754	0.535088	0.631579	1	0.166667	0.254386	0.342105	0.421053	0.5	0.04386	0.122807	0.72807	0.842105	0.95614	0.412281	0.460177	0.026316	0.245614	0.464912	0.72807	0.95614	0.280702
0.378788	0.363636	0.257576	0.384615	0.215385	0.138462	0.045455	0.19697	0.484848	0.666667	1	0.030303	0.272727	0.469697	0.681818	0.984848	0.015152	0.212121	0.378788	0.757576	0.939394	0.515152	0.212121	0.272727	0.076923	0.076923	0.015385	0.015152	0.272727	0.5	0.666667	1	0.19697	0.227273	0.348485	0.393939	0.772727	0.106061	0.151515	0.621212	0.848485	0.924242	0.318182	0.369231	0.136364	0.257576	0.378788	0.757576	0.939394	0.348485
0.347239	0.309202	0.343558	0.197789	0.275184	0.224816	0.002454	0.257669	0.51411	0.768098	1	0.004908	0.242945	0.450307	0.744785	0.996319	0.001227	0.239264	0.506748	0.733742	0.997546	0.480982	0.226994	0.292025	0.092138	0.052826	0.003686	0.001227	0.225767	0.426994	0.732515	1	0.038037	0.251534	0.43681	0.801227	0.997546	0.006135	0.310429	0.581595	0.711656	0.992638	0.557055	0.385749	0.003681	0.262577	0.48589	0.743558	0.997546	0.331288
0.379791	0.324913	0.295296	0.236269	0.204882	0.186574	0.002613	0.189895	0.455575	0.749129	0.999129	0.001742	0.256969	0.506969	0.71777	1	0.000871	0.301394	0.539199	0.786585	0.994774	0.389373	0.12108	0.489547	0.040105	0.083697	0.001744	0.000871	0.267422	0.517422	0.766551	1	0.221254	0.341463	0.528746	0.813589	0.993902	0.010453	0.195993	0.459059	0.74216	0.981707	0.481707	0.322581	0.013066	0.319686	0.544425	0.762195	0.994774	0.355401
0.362218	0.402946	0.234835	0.296618	0.155247	0.187337	0.0026	0.282496	0.577123	0.790295	1	0.001733	0.22357	0.511265	0.761698	0.999133	0.000867	0.237435	0.422877	0.630849	0.966205	0.506066	0.116118	0.377816	0.049436	0.085863	0.004337	0.000867	0.185442	0.52513	0.793761	1	0.016464	0.292894	0.409879	0.681976	0.886482	0.003466	0.281629	0.541594	0.70104	0.988735	0.444541	0.348656	0.003466	0.218371	0.414211	0.665511	0.966205	0.443674
0.257692	0.498077	0.244231	0.22158	0.132948	0.204239	0.021154	0.280769	0.488462	0.676923	0.994231	0.003846	0.201923	0.492308	0.767308	1	0.001923	0.284615	0.513462	0.775	0.998077	0.675	0.130769	0.194231	0.05395	0.026975	0.011561	0.001923	0.213462	0.582692	0.763462	1	0.007692	0.321154	0.455769	0.901923	0.996154	0.063462	0.236538	0.373077	0.544231	0.990385	0.551923	0.308285	0.005769	0.278846	0.525	0.705769	0.998077	0.526923
0.434211	0.236842	0.328947	0.198675	0.284768	0.198675	0.013158	0.269737	0.585526	0.822368	1	0.019737	0.157895	0.394737	0.657895	0.947368	0.006579	0.263158	0.453947	0.684211	0.973684	0.361842	0.335526	0.302632	0.10596	0.05298	0.013245	0.006579	0.25	0.434211	0.651316	1	0.019737	0.144737	0.348684	0.684211	0.789474	0.118421	0.532895	0.618421	0.894737	0.973684	0.460526	0.370861	0.026316	0.210526	0.407895	0.671053	0.953947	0.217105
0.396296	0.3	0.303704	0.200743	0.263941	0.200743	0.007407	0.211111	0.466667	0.737037	1	0.011111	0.248148	0.459259	0.733333	0.948148	0.003704	0.318519	0.533333	0.755556	0.996296	0.418519	0.111111	0.47037	0.070632	0.063197	0.003717	0.003704	0.114815	0.585185	0.840741	1	0.040741	0.422222	0.540741	0.696296	0.925926	0.107407	0.248148	0.366667	0.651852	0.992593	0.411111	0.446097	0.014815	0.418519	0.585185	0.77037	0.996296	0.266667
0.405797	0.289855	0.304348	0.264706	0.25	0.147059	0.043478	0.275362	0.449275	0.652174	1	0.072464	0.144928	0.434783	0.681159	0.985507	0.014493	0.217391	0.608696	0.782609	0.971014	0.565217	0.15942	0.275362	0.088235	0.058824	0	0.014493	0.130435	0.362319	0.565217	1	0.173913	0.188406	0.231884	0.478261	0.956522	0.608696	0.652174	0.73913	0.811594	0.884058	0.333333	0.382353	0.144928	0.231884	0.623188	0.753623	0.927536	0.275362
0.28022	0.406593	0.313187	0.21547	0.198895	0.270718	0.06044	0.247253	0.5	0.791209	1	0.010989	0.258242	0.538462	0.703297	0.967033	0.005495	0.164835	0.428571	0.774725	0.994505	0.554945	0.417582	0.027473	0.127072	0.005525	0.005525	0.005495	0.357143	0.604396	0.741758	1	0.027473	0.17033	0.340659	0.824176	0.994505	0.428571	0.428571	0.434066	0.43956	0.450549	0.576923	0.364641	0.016484	0.21978	0.527473	0.747253	0.994505	0.368132
0.391198	0.410758	0.198044	0.316176	0.169118	0.139706	0.012225	0.315403	0.552567	0.819071	0.997555	0.00489	0.210269	0.425428	0.682152	0.99022	0.002445	0.259169	0.542787	0.728606	1	0.748166	0.09291	0.158924	0.036765	0.061275	0.007353	0.002445	0.217604	0.440098	0.753056	1	0.03912	0.276284	0.584352	0.731051	0.973105	0.09291	0.486553	0.625917	0.772616	0.93643	0.352078	0.303922	0.03423	0.227384	0.381418	0.674817	0.987775	0.471883
0.568465	0.248963	0.182573	0.291667	0.1875	0.075	0.012448	0.377593	0.589212	0.788382	1	0.008299	0.190871	0.452282	0.755187	0.995851	0.004149	0.107884	0.273859	0.390041	0.929461	0.572614	0.124481	0.302905	0.05	0.1	0.008333	0.004149	0.410788	0.659751	0.813278	1	0.016598	0.041494	0.186722	0.236515	0.817427	0.053942	0.26556	0.348548	0.485477	0.962656	0.219917	0.208333	0.016598	0.112033	0.244813	0.3361	0.825726	0.240664
0.288413	0.394207	0.31738	0.213115	0.17024	0.282472	0.002519	0.29597	0.559194	0.787154	0.998741	0.005038	0.244332	0.482368	0.72796	1	0.001259	0.230479	0.474811	0.739295	0.997481	0.459698	0.244332	0.29597	0.099622	0.054224	0.003783	0.001259	0.209068	0.462217	0.746851	1	0.039043	0.206549	0.423174	0.788413	0.955919	0.006297	0.324937	0.575567	0.700252	0.988665	0.56801	0.398487	0.003778	0.260705	0.478589	0.734257	0.997481	0.384131
0.263543	0.508053	0.228404	0.228739	0.139296	0.193548	0.002928	0.351391	0.549048	0.774524	1	0.005857	0.219619	0.491947	0.727672	0.998536	0.001464	0.20937	0.415813	0.749634	0.994143	0.626647	0.152269	0.221083	0.060117	0.054252	0.001466	0.001464	0.254758	0.491947	0.79063	1	0.143485	0.27672	0.420205	0.740849	0.85798	0.019034	0.228404	0.562225	0.711567	0.992679	0.484627	0.343109	0.007321	0.238653	0.474378	0.761347	0.997072	0.528551
0.344086	0.392473	0.263441	0.286486	0.189189	0.205405	0.010753	0.241935	0.5	0.790323	0.994624	0.021505	0.172043	0.397849	0.704301	1	0.005376	0.349462	0.516129	0.698925	0.989247	0.580645	0.155914	0.263441	0.054054	0.064865	0.021622	0.005376	0.155914	0.317204	0.623656	1	0.096774	0.413978	0.645161	0.682796	0.967742	0.016129	0.456989	0.688172	0.752688	0.930108	0.403226	0.421622	0.016129	0.274194	0.456989	0.72043	0.951613	0.38172
0.350365	0.321168	0.328467	0.169118	0.220588	0.242647	0.080292	0.328467	0.532847	0.773723	1	0.014599	0.189781	0.372263	0.729927	0.970803	0.007299	0.240876	0.481752	0.737226	0.978102	0.328467	0.153285	0.518248	0.051471	0.080882	0.007353	0.007299	0.189781	0.343066	0.773723	1	0.218978	0.262774	0.29927	0.386861	0.708029	0.080292	0.474453	0.605839	0.810219	0.978102	0.467153	0.426471	0.051095	0.284672	0.481752	0.729927	0.978102	0.291971
0.298182	0.386667	0.315152	0.228155	0.218447	0.253641	0.002424	0.254545	0.515152	0.763636	0.998788	0.004848	0.250909	0.490909	0.739394	1	0.001212	0.233939	0.484848	0.726061	0.997576	0.483636	0.233939	0.282424	0.105583	0.054612	0.003641	0.001212	0.206061	0.459394	0.738182	1	0.002424	0.254545	0.419394	0.752727	0.997576	0.006061	0.317576	0.585455	0.773333	0.991515	0.566061	0.38835	0.003636	0.266667	0.476364	0.744242	0.997576	0.412121
0.346405	0.366013	0.287582	0.243421	0.203947	0.236842	0.026144	0.313725	0.464052	0.751634	0.980392	0.013072	0.222222	0.477124	0.718954	1	0.006536	0.215686	0.535948	0.777778	0.973856	0.359477	0.30719	0.333333	0.125	0.046053	0.006579	0.006536	0.117647	0.503268	0.751634	1	0.026144	0.248366	0.614379	0.888889	0.986928	0.176471	0.326797	0.411765	0.647059	0.830065	0.392157	0.486842	0.03268	0.215686	0.535948	0.745098	0.973856	0.379085
0.38746	0.342444	0.270096	0.256039	0.247987	0.175523	0.004823	0.22508	0.488746	0.747588	1	0.003215	0.284566	0.533762	0.755627	0.996785	0.001608	0.228296	0.474277	0.729904	0.995177	0.379421	0.036977	0.583601	0.020934	0.059581	0.00161	0.001608	0.233119	0.59164	0.869775	1	0.118971	0.35209	0.432476	0.824759	0.885852	0.030547	0.249196	0.477492	0.667203	0.9791	0.442122	0.386473	0.022508	0.247588	0.491961	0.696141	0.993569	0.368167
0.411765	0.309598	0.278638	0.26087	0.267081	0.167702	0.009288	0.244582	0.50774	0.798762	0.996904	0.006192	0.272446	0.473684	0.696594	0.96904	0.003096	0.232198	0.501548	0.721362	1	0.448916	0.151703	0.399381	0.055901	0.068323	0	0.003096	0.417957	0.640867	0.764706	1	0.099071	0.145511	0.393189	0.55418	0.869969	0.012384	0.20743	0.365325	0.795666	0.990712	0.396285	0.416149	0.021672	0.226006	0.408669	0.55418	0.98452	0.417957
0.306306	0.441441	0.252252	0.257919	0.158371	0.262443	0.009009	0.27027	0.522523	0.743243	0.995495	0.013514	0.234234	0.468468	0.707207	1	0.004505	0.225225	0.527027	0.806306	0.981982	0.761261	0.126126	0.112613	0.049774	0.040724	0.004525	0.004505	0.297297	0.486486	0.702703	1	0.036036	0.509009	0.797297	0.837838	0.927928	0.045045	0.067568	0.112613	0.252252	0.981982	0.333333	0.334842	0.027027	0.234234	0.522523	0.797297	0.981982	0.495495
0.41	0.25	0.34	0.151515	0.252525	0.161616	0.06	0.31	0.53	0.77	0.98	0.03	0.17	0.4	0.56	1	0.01	0.22	0.49	0.72	0.99	0.47	0.53	0	0.181818	0	0	0.01	0.3	0.53	0.8	1	0.02	0.19	0.38	0.69	0.97	0	0	0	0	0	0.36	0.484848	0.02	0.2	0.45	0.71	0.96	0.26
0.322624	0.46988	0.207497	0.266756	0.146113	0.206434	0.002677	0.263722	0.538153	0.795181	0.998661	0.004016	0.243641	0.497992	0.742972	1	0.001339	0.238286	0.444444	0.717537	0.994645	0.67336	0.10174	0.2249	0.037534	0.050938	0.002681	0.001339	0.246319	0.503347	0.738956	1	0.065596	0.219545	0.321285	0.757697	0.840696	0.088353	0.30656	0.682731	0.84739	0.995984	0.468541	0.33244	0.01071	0.219545	0.443106	0.605087	0.994645	0.453815
0.374707	0.351288	0.274005	0.269953	0.206573	0.185446	0.009368	0.229508	0.437939	0.735363	1	0.004684	0.177986	0.496487	0.744731	0.985948	0.002342	0.35363	0.550351	0.747073	0.995316	0.461358	0.133489	0.405152	0.061033	0.075117	0.004695	0.002342	0.154567	0.468384	0.723653	1	0.051522	0.447307	0.5363	0.704918	0.995316	0.01171	0.257611	0.480094	0.800937	0.960187	0.470726	0.328638	0.01171	0.344262	0.543326	0.737705	0.995316	0.381733
0.323484	0.412131	0.264386	0.260125	0.165109	0.266355	0.00311	0.211509	0.438569	0.727838	1	0.006221	0.264386	0.513219	0.744946	0.99689	0.001555	0.261275	0.531882	0.77916	0.990669	0.525661	0.111975	0.362364	0.101246	0.095016	0.010903	0.001555	0.227061	0.438569	0.741835	1	0.066874	0.276827	0.528771	0.734059	0.970451	0.031104	0.311042	0.539658	0.755832	0.968896	0.342146	0.507788	0.018663	0.258165	0.517885	0.755832	0.987558	0.421462
0.308989	0.382022	0.308989	0.259887	0.20904	0.259887	0.016854	0.235955	0.494382	0.831461	1	0.011236	0.314607	0.52809	0.719101	0.983146	0.005618	0.202247	0.426966	0.646067	0.966292	0.421348	0.38764	0.191011	0.158192	0.022599	0	0.005618	0.207865	0.573034	0.865169	1	0.050562	0.191011	0.488764	0.651685	0.97191	0.331461	0.370787	0.421348	0.792135	0.842697	0.438202	0.497175	0.022472	0.292135	0.477528	0.651685	0.955056	0.337079
0.446809	0.333333	0.219858	0.307143	0.157143	0.164286	0.014184	0.184397	0.475177	0.758865	1	0.021277	0.319149	0.588652	0.801418	0.992908	0.007092	0.134752	0.404255	0.659574	0.978723	0.48227	0.134752	0.382979	0.042857	0.1	0	0.007092	0.269504	0.439716	0.851064	1	0.205674	0.22695	0.375887	0.411348	0.680851	0.028369	0.134752	0.539007	0.765957	0.879433	0.404255	0.285714	0.06383	0.361702	0.489362	0.666667	0.964539	0.347518
0.455882	0.25	0.294118	0.298507	0.238806	0.149254	0.029412	0.176471	0.455882	0.720588	0.985294	0.117647	0.235294	0.441176	0.602941	0.911765	0.014706	0.308824	0.485294	0.838235	1	0.558824	0.029412	0.411765	0.029851	0.059701	0	0.014706	0.132353	0.411765	0.573529	1	0.470588	0.470588	0.470588	0.470588	0.485294	0.279412	0.367647	0.676471	0.779412	0.882353	0.367647	0.447761	0.073529	0.323529	0.544118	0.764706	0.926471	0.264706
0.400283	0.404526	0.195191	0.303116	0.148725	0.11898	0.004243	0.280057	0.437058	0.704385	1	0.002829	0.186704	0.424328	0.721358	0.998586	0.001414	0.490806	0.681754	0.838755	0.984441	0.591231	0.11174	0.29703	0.048159	0.073654	0.008499	0.001414	0.248939	0.408769	0.653465	1	0.015559	0.509194	0.623762	0.717115	0.902405	0.008487	0.189533	0.660537	0.826025	0.988685	0.417256	0.29745	0.009901	0.492221	0.663366	0.820368	0.990099	0.473833
0.410628	0.309179	0.280193	0.223301	0.252427	0.140777	0.009662	0.207729	0.497585	0.753623	0.990338	0.048309	0.285024	0.410628	0.676329	1	0.004831	0.169082	0.599034	0.78744	0.975845	0.541063	0.130435	0.328502	0.067961	0.067961	0	0.004831	0.26087	0.396135	0.647343	1	0.014493	0.067633	0.603865	0.753623	0.937198	0.091787	0.198068	0.570048	0.801932	0.995169	0.512077	0.378641	0.014493	0.31401	0.536232	0.758454	0.995169	0.304348
0.380952	0.342857	0.27619	0.230769	0.269231	0.182692	0.095238	0.27619	0.504762	0.72381	0.971429	0.047619	0.333333	0.590476	0.819048	1	0.009524	0.114286	0.314286	0.628571	0.952381	0.228571	0	0.771429	0	0.076923	0	0.009524	0.057143	0.561905	0.809524	1	0	0	0	0	0	0.07619	0.285714	0.47619	0.695238	0.961905	0.333333	0.461538	0.028571	0.142857	0.466667	0.714286	0.952381	0.32381
0.423077	0.330769	0.246154	0.302326	0.248062	0.100775	0.069231	0.238462	0.492308	0.753846	1	0.023077	0.284615	0.561538	0.692308	0.961538	0.007692	0.169231	0.330769	0.746154	0.992308	0.469231	0.215385	0.315385	0.077519	0.093023	0	0.007692	0.207692	0.523077	0.669231	1	0.192308	0.253846	0.323077	0.392308	0.484615	0.076923	0.146154	0.761538	0.869231	0.984615	0.361538	0.434109	0.015385	0.169231	0.392308	0.792308	0.992308	0.461538
0.364706	0.308235	0.327059	0.209906	0.259434	0.186321	0.004706	0.244706	0.505882	0.734118	1	0.011765	0.211765	0.416471	0.769412	0.995294	0.002353	0.263529	0.508235	0.741176	0.997647	0.425882	0.167059	0.407059	0.061321	0.080189	0.004717	0.002353	0.141176	0.416471	0.738824	1	0.183529	0.381176	0.6	0.811765	0.931765	0.023529	0.282353	0.529412	0.724706	0.990588	0.569412	0.358491	0.009412	0.258824	0.470588	0.748235	0.992941	0.345882
0.3675	0.28	0.3525	0.192982	0.303258	0.218045	0.005	0.2575	0.4725	0.73	0.9975	0.01	0.1725	0.4375	0.745	0.9925	0.0025	0.3025	0.54	0.7625	1	0.34	0.1	0.56	0.0401	0.105263	0.005013	0.0025	0.2175	0.3875	0.7175	1	0.055	0.1725	0.2025	0.2875	0.36	0.0175	0.41	0.6175	0.7825	0.9925	0.5375	0.441103	0.0125	0.2475	0.4425	0.6925	0.995	0.2925
0.320594	0.464968	0.214437	0.240426	0.129787	0.191489	0.006369	0.212314	0.422505	0.842887	0.995754	0.004246	0.29087	0.537155	0.70276	1	0.002123	0.22293	0.443737	0.660297	0.95966	0.685775	0.080679	0.233546	0.040426	0.057447	0.002128	0.002123	0.265393	0.503185	0.675159	1	0.014862	0.150743	0.193206	0.271762	0.859873	0.029724	0.301486	0.749469	0.834395	0.980892	0.467091	0.331915	0.008493	0.216561	0.477707	0.622081	0.95966	0.469214
0.365385	0.326923	0.307692	0.223301	0.281553	0.194175	0.019231	0.240385	0.480769	0.711538	0.990385	0.086538	0.25	0.567308	0.778846	1	0.009615	0.182692	0.461538	0.692308	0.961538	0.413462	0.298077	0.288462	0.106796	0.048544	0.009709	0.009615	0.288462	0.663462	0.798077	1	0.115385	0.365385	0.625	0.836538	0.961538	0.028846	0.144231	0.221154	0.461538	0.538462	0.346154	0.38835	0.028846	0.153846	0.413462	0.625	0.961538	0.336538
0.379913	0.326055	0.294032	0.252187	0.218659	0.173469	0.002911	0.190684	0.481805	0.787482	1	0.007278	0.279476	0.525473	0.764192	0.995633	0.001456	0.272198	0.464338	0.695779	0.997089	0.515284	0.141194	0.343523	0.048105	0.077259	0.004373	0.001456	0.171761	0.481805	0.783115	1	0.004367	0.363901	0.554585	0.655022	0.803493	0.018923	0.295488	0.471616	0.739447	0.992722	0.455604	0.3207	0.004367	0.294032	0.464338	0.6754	0.997089	0.344978
0.328767	0.394521	0.276712	0.252747	0.173077	0.17033	0.005479	0.219178	0.463014	0.726027	1	0.016438	0.252055	0.542466	0.805479	0.989041	0.00274	0.30137	0.479452	0.673973	0.994521	0.545205	0.189041	0.265753	0.07967	0.074176	0.002747	0.00274	0.249315	0.536986	0.772603	1	0.035616	0.391781	0.512329	0.641096	0.936986	0.005479	0.139726	0.276712	0.789041	0.917808	0.471233	0.368132	0.010959	0.345205	0.515068	0.715068	0.994521	0.405479
0.373239	0.366197	0.260563	0.276596	0.212766	0.120567	0.014085	0.267606	0.542254	0.760563	1	0.021127	0.28169	0.492958	0.866197	0.992958	0.007042	0.161972	0.338028	0.570423	0.746479	0.443662	0.197183	0.359155	0.070922	0.099291	0.014184	0.007042	0.309859	0.669014	0.859155	1	0.028169	0.070423	0.34507	0.43662	0.647887	0.112676	0.190141	0.528169	0.732394	0.943662	0.380282	0.340426	0.028169	0.161972	0.408451	0.556338	0.943662	0.246479
0.384615	0.306122	0.309262	0.218553	0.231132	0.187107	0.00314	0.288854	0.577708	0.839874	0.99843	0.00471	0.233909	0.480377	0.722135	0.993721	0.00157	0.21821	0.437991	0.660911	1	0.408163	0.128728	0.463108	0.048742	0.095912	0.004717	0.00157	0.22135	0.491366	0.769231	1	0.078493	0.246468	0.401884	0.572998	0.990581	0.018838	0.265306	0.55573	0.828885	0.971743	0.477237	0.352201	0.007849	0.213501	0.430141	0.624804	0.992151	0.33124
0.440771	0.316804	0.242424	0.279006	0.198895	0.179558	0.008264	0.294766	0.570248	0.763085	1	0.00551	0.206612	0.4573	0.757576	0.986226	0.002755	0.239669	0.446281	0.69697	0.975207	0.592287	0.143251	0.264463	0.060773	0.071823	0.005525	0.002755	0.206612	0.413223	0.757576	1	0.013774	0.231405	0.471074	0.586777	0.977961	0.024793	0.432507	0.628099	0.790634	0.969697	0.38292	0.364641	0.013774	0.250689	0.471074	0.699725	0.986226	0.369146
0.272189	0.573964	0.153846	0.220238	0.113095	0.113095	0.017751	0.183432	0.343195	0.47929	0.934911	0.011834	0.497041	0.656805	0.816568	0.994083	0.005917	0.076923	0.218935	0.35503	1	0.650888	0.218935	0.130178	0.083333	0.02381	0	0.005917	0.431953	0.633136	0.822485	1	0.04142	0.207101	0.295858	0.455621	0.869822	0.112426	0.136095	0.171598	0.360947	0.39645	0.591716	0.321429	0.035503	0.313609	0.662722	0.822485	0.988166	0.579882
0.367521	0.316239	0.316239	0.24339	0.232504	0.195179	0.002331	0.216006	0.483294	0.749029	0.993007	0.001554	0.227661	0.452991	0.71251	0.999223	0.000777	0.307692	0.556333	0.787102	1	0.477078	0.099456	0.423465	0.044323	0.081649	0.003888	0.000777	0.177933	0.401709	0.700078	1	0.027195	0.324786	0.540016	0.714064	0.995338	0.006216	0.346542	0.610723	0.836053	0.997669	0.503497	0.402799	0.003885	0.285936	0.531469	0.756022	0.998446	0.33411
0.375723	0.323699	0.300578	0.209302	0.226744	0.186047	0.011561	0.283237	0.462428	0.716763	1	0.075145	0.242775	0.554913	0.797688	0.976879	0.00578	0.225434	0.468208	0.728324	0.99422	0.352601	0.254335	0.393064	0.098837	0.063953	0.017442	0.00578	0.190751	0.520231	0.693642	1	0.023121	0.219653	0.531792	0.774566	0.855491	0.052023	0.294798	0.393064	0.710983	0.99422	0.346821	0.418605	0.028902	0.184971	0.479769	0.705202	0.901734	0.33526
0.375167	0.381842	0.242991	0.284759	0.168449	0.167112	0.00267	0.214953	0.453939	0.75968	1	0.004005	0.23231	0.503338	0.739653	0.995995	0.001335	0.335113	0.544726	0.735648	0.99733	0.568758	0.130841	0.300401	0.045455	0.072193	0.002674	0.001335	0.158879	0.41522	0.728972	1	0.238985	0.424566	0.611482	0.731642	0.837116	0.004005	0.359146	0.558077	0.774366	0.949266	0.425901	0.339572	0.004005	0.325768	0.522029	0.732977	0.99733	0.421896
0.488318	0.285047	0.226636	0.29274	0.234192	0.100703	0.007009	0.259346	0.495327	0.754673	1	0.004673	0.273364	0.586449	0.829439	0.995327	0.002336	0.168224	0.364486	0.61215	0.992991	0.481308	0.175234	0.343458	0.079625	0.065574	0.004684	0.002336	0.254673	0.602804	0.859813	1	0.109813	0.320093	0.544393	0.703271	0.904206	0.023364	0.154206	0.448598	0.586449	0.978972	0.315421	0.346604	0.023364	0.158879	0.36215	0.614486	0.939252	0.352804
0.346667	0.32	0.333333	0.243243	0.22973	0.216216	0.026667	0.2	0.573333	0.706667	1	0.04	0.306667	0.493333	0.76	0.96	0.013333	0.226667	0.413333	0.653333	0.973333	0.453333	0.453333	0.093333	0.162162	0.027027	0	0.013333	0.2	0.573333	0.733333	1	0.226667	0.36	0.533333	0.8	0.946667	0.08	0.08	0.106667	0.133333	0.16	0.466667	0.378378	0.066667	0.28	0.506667	0.8	0.933333	0.346667
0.34492	0.262032	0.393048	0.168901	0.262735	0.22252	0.008021	0.205882	0.47861	0.745989	1	0.005348	0.256684	0.524064	0.735294	0.991979	0.002674	0.26738	0.516043	0.740642	0.994652	0.275401	0.181818	0.542781	0.058981	0.053619	0.021448	0.002674	0.259358	0.435829	0.794118	1	0.058824	0.360963	0.516043	0.820856	0.935829	0.010695	0.165775	0.5	0.673797	0.991979	0.502674	0.434316	0.010695	0.237968	0.441176	0.71123	0.989305	0.197861
0.446429	0.267857	0.285714	0.306306	0.234234	0.153153	0.026786	0.241071	0.571429	0.8125	0.991071	0.035714	0.267857	0.491071	0.633929	1	0.008929	0.1875	0.4375	0.732143	0.982143	0.392857	0.267857	0.339286	0.063063	0.081081	0.027027	0.008929	0.098214	0.464286	0.696429	1	0.125	0.178571	0.526786	0.642857	0.919643	0.241071	0.3125	0.714286	0.794643	0.973214	0.4375	0.396396	0.107143	0.267857	0.526786	0.696429	0.982143	0.241071
0.366925	0.421189	0.211886	0.264249	0.129534	0.173575	0.020672	0.310078	0.434109	0.723514	0.989664	0.007752	0.178295	0.472868	0.687339	1	0.002584	0.242894	0.630491	0.819121	0.992248	0.635659	0.118863	0.245478	0.041451	0.041451	0	0.002584	0.165375	0.447028	0.651163	1	0.124031	0.630491	0.739018	0.863049	0.94832	0.25323	0.333333	0.563307	0.777778	0.96124	0.364341	0.316062	0.007752	0.263566	0.565891	0.751938	0.992248	0.44186
0.410345	0.258621	0.331034	0.197232	0.276817	0.16263	0.006897	0.341379	0.544828	0.782759	1	0.010345	0.12069	0.37931	0.675862	0.910345	0.003448	0.248276	0.451724	0.765517	0.996552	0.396552	0.251724	0.351724	0.083045	0.062284	0	0.003448	0.203448	0.482759	0.631034	1	0.013793	0.17931	0.496552	0.775862	0.944828	0.055172	0.344828	0.544828	0.696552	0.993103	0.565517	0.366782	0.010345	0.210345	0.465517	0.713793	0.993103	0.265517
0.214953	0.649533	0.135514	0.253521	0.089202	0.131455	0.014019	0.135514	0.299065	0.626168	1	0.009346	0.369159	0.565421	0.733645	0.995327	0.004673	0.116822	0.257009	0.747664	0.976636	0.780374	0.163551	0.056075	0.084507	0.018779	0.00939	0.004673	0.378505	0.574766	0.794393	1	0.046729	0.079439	0.168224	0.280374	0.859813	0.009346	0.018692	0.17757	0.308411	0.32243	0.635514	0.319249	0.023364	0.359813	0.584112	0.761682	0.976636	0.668224
0.412791	0.319767	0.267442	0.233918	0.210526	0.204678	0.017442	0.296512	0.494186	0.755814	0.994186	0.011628	0.22093	0.569767	0.819767	1	0.005814	0.174419	0.401163	0.593023	0.848837	0.517442	0.075581	0.406977	0.035088	0.105263	0	0.005814	0.325581	0.540698	0.77907	1	0.133721	0.145349	0.162791	0.180233	0.837209	0.023256	0.238372	0.395349	0.645349	0.947674	0.389535	0.362573	0.040698	0.174419	0.383721	0.610465	0.848837	0.331395
0.358974	0.333333	0.307692	0.221963	0.235981	0.21729	0.013986	0.263403	0.503497	0.792541	0.997669	0.004662	0.226107	0.508159	0.736597	0.993007	0.002331	0.247086	0.477855	0.694639	1	0.389277	0.398601	0.212121	0.107477	0.056075	0.023364	0.002331	0.27972	0.5338	0.764569	1	0.04662	0.265734	0.543124	0.757576	0.979021	0.004662	0.09324	0.32634	0.713287	0.995338	0.480186	0.397196	0.009324	0.2331	0.487179	0.72028	0.990676	0.398601
0.373333	0.36	0.266667	0.263393	0.214286	0.174107	0.008889	0.253333	0.475556	0.715556	1	0.022222	0.315556	0.551111	0.746667	0.991111	0.004444	0.182222	0.4	0.755556	0.977778	0.555556	0.2	0.244444	0.089286	0.053571	0	0.004444	0.306667	0.511111	0.666667	1	0.035556	0.231111	0.364444	0.808889	0.986667	0.088889	0.142222	0.408889	0.755556	0.92	0.408889	0.375	0.035556	0.226667	0.404444	0.742222	0.986667	0.355556
0.393782	0.300518	0.305699	0.230104	0.212803	0.186851	0.003454	0.193437	0.490501	0.761658	0.996546	0.013817	0.222798	0.481865	0.770294	1	0.001727	0.319516	0.512953	0.713299	0.979275	0.468048	0.150259	0.381693	0.050173	0.077855	0.00519	0.001727	0.127807	0.352332	0.716753	1	0.005181	0.414508	0.590674	0.713299	0.841105	0.022453	0.340242	0.568221	0.804836	0.989637	0.502591	0.318339	0.005181	0.303972	0.492228	0.708117	0.991364	0.348877
0.384615	0.318681	0.296703	0.222222	0.222222	0.211111	0.021978	0.230769	0.461538	0.758242	0.967033	0.043956	0.197802	0.384615	0.637363	1	0.010989	0.241758	0.527473	0.835165	0.978022	0.32967	0.351648	0.318681	0.1	0.055556	0.011111	0.010989	0.32967	0.527473	0.692308	1	0.032967	0.10989	0.494505	0.659341	0.967033	0.153846	0.21978	0.296703	0.769231	0.901099	0.461538	0.444444	0.043956	0.197802	0.527473	0.747253	0.978022	0.263736
0.488235	0.264706	0.247059	0.272189	0.201183	0.201183	0.029412	0.235294	0.494118	0.794118	0.994118	0.011765	0.205882	0.441176	0.729412	0.988235	0.005882	0.294118	0.517647	0.652941	1	0.770588	0.041176	0.188235	0.053254	0.029586	0.005917	0.005882	0.188235	0.441176	0.8	1	0.358824	0.358824	0.470588	0.741176	0.852941	0.394118	0.435294	0.570588	0.617647	0.705882	0.247059	0.284024	0.047059	0.405882	0.570588	0.647059	0.976471	0.252941
0.321918	0.452055	0.226027	0.275862	0.17931	0.186207	0.020548	0.171233	0.472603	0.753425	0.993151	0.013699	0.205479	0.452055	0.691781	1	0.006849	0.383562	0.568493	0.746575	0.958904	0.363014	0.342466	0.294521	0.048276	0.048276	0.02069	0.006849	0.089041	0.191781	0.5	1	0.10274	0.69863	0.787671	0.883562	0.972603	0.226027	0.363014	0.465753	0.575342	0.691781	0.438356	0.372414	0.109589	0.349315	0.547945	0.767123	0.958904	0.452055
0.422269	0.302521	0.27521	0.231579	0.233684	0.16	0.006303	0.222689	0.44958	0.726891	1	0.004202	0.210084	0.504202	0.737395	0.989496	0.002101	0.367647	0.569328	0.773109	0.991597	0.489496	0.117647	0.392857	0.046316	0.08	0.004211	0.002101	0.189076	0.430672	0.733193	1	0.184874	0.531513	0.602941	0.72479	0.821429	0.010504	0.313025	0.489496	0.802521	0.993697	0.434874	0.336842	0.014706	0.42437	0.605042	0.777311	0.991597	0.338235
0.491018	0.293413	0.215569	0.301205	0.186747	0.144578	0.011976	0.323353	0.616766	0.820359	1	0.053892	0.185629	0.437126	0.652695	0.994012	0.005988	0.143713	0.329341	0.526946	0.928144	0.45509	0.185629	0.359281	0.072289	0.084337	0	0.005988	0.353293	0.532934	0.694611	1	0.143713	0.293413	0.341317	0.473054	0.682635	0.017964	0.215569	0.736527	0.826347	0.976048	0.281437	0.313253	0.023952	0.155689	0.323353	0.491018	0.928144	0.281437
0.333797	0.358832	0.307371	0.236769	0.192201	0.218663	0.004172	0.194715	0.458971	0.732962	0.997218	0.006954	0.260083	0.521558	0.755216	1	0.001391	0.2879	0.50904	0.752434	0.993046	0.381085	0.155772	0.463143	0.054318	0.090529	0.001393	0.001391	0.235049	0.499305	0.713491	1	0.004172	0.299026	0.478442	0.564673	0.958275	0.022253	0.21975	0.495132	0.781641	0.993046	0.561892	0.342618	0.005563	0.301808	0.522949	0.751043	0.993046	0.371349
0.389247	0.384946	0.225806	0.25	0.200431	0.176724	0.006452	0.219355	0.498925	0.744086	1	0.004301	0.28172	0.56129	0.767742	0.995699	0.002151	0.23871	0.43871	0.660215	0.997849	0.677419	0.094624	0.227957	0.036638	0.040948	0.006466	0.002151	0.27957	0.595699	0.804301	1	0.283871	0.322581	0.436559	0.834409	0.926882	0.032258	0.126882	0.329032	0.486022	0.802151	0.408602	0.37931	0.012903	0.24086	0.443011	0.724731	0.989247	0.380645
0.355422	0.36747	0.277108	0.269618	0.191147	0.181087	0.008032	0.2249	0.463855	0.753012	1	0.004016	0.263052	0.528112	0.769076	0.995984	0.002008	0.2751	0.516064	0.706827	0.981928	0.48996	0.160643	0.349398	0.078471	0.074447	0.01006	0.002008	0.251004	0.568273	0.807229	1	0.046185	0.192771	0.626506	0.773092	0.935743	0.02008	0.2751	0.445783	0.610442	0.993976	0.600402	0.321932	0.02008	0.285141	0.508032	0.706827	0.995984	0.381526
0.386567	0.337313	0.276119	0.237668	0.192825	0.170404	0.01791	0.241791	0.574627	0.810448	0.998507	0.002985	0.185075	0.425373	0.716418	1	0.001493	0.316418	0.492537	0.679104	0.997015	0.502985	0.114925	0.38209	0.049327	0.085202	0.004484	0.001493	0.176119	0.532836	0.773134	1	0.031343	0.302985	0.459701	0.6	0.995522	0.002985	0.274627	0.501493	0.777612	0.956716	0.456716	0.337818	0.004478	0.255224	0.428358	0.68209	0.958209	0.383582
0.413885	0.365821	0.220294	0.264706	0.17246	0.171123	0.00534	0.242991	0.516689	0.82243	1	0.00267	0.311081	0.512684	0.715621	0.993324	0.001335	0.214953	0.449933	0.676903	0.94259	0.594126	0.06008	0.345794	0.028075	0.076203	0.004011	0.001335	0.252336	0.495327	0.735648	1	0.024032	0.165554	0.316422	0.58745	0.715621	0.021362	0.284379	0.519359	0.817089	0.995995	0.356475	0.342246	0.004005	0.194927	0.427236	0.604806	0.94259	0.383178
0.310592	0.362657	0.32675	0.239209	0.197842	0.253597	0.005386	0.247756	0.477558	0.696589	1	0.003591	0.238779	0.506284	0.775583	0.996409	0.001795	0.245961	0.51526	0.736086	0.992819	0.576302	0.143627	0.280072	0.052158	0.084532	0.008993	0.001795	0.235189	0.536804	0.815081	1	0.059246	0.346499	0.527828	0.64991	0.969479	0.005386	0.251346	0.40395	0.671454	0.958707	0.48474	0.442446	0.014363	0.314183	0.524237	0.743268	0.992819	0.348294
0.43609	0.353383	0.210526	0.219697	0.181818	0.159091	0.015038	0.210526	0.451128	0.631579	1	0.022556	0.360902	0.609023	0.819549	0.984962	0.007519	0.157895	0.511278	0.721805	0.977444	0.609023	0.120301	0.270677	0.060606	0.060606	0	0.007519	0.255639	0.406015	0.81203	1	0.045113	0.067669	0.135338	0.24812	0.969925	0.180451	0.496241	0.56391	0.729323	0.796992	0.368421	0.257576	0.030075	0.135338	0.503759	0.714286	0.962406	0.398496
0.347286	0.339412	0.313303	0.221808	0.22927	0.21476	0.004973	0.237464	0.478243	0.736842	0.998757	0.000829	0.22586	0.507667	0.750104	1	0.000414	0.27932	0.521343	0.760464	0.999586	0.420638	0.138417	0.440945	0.05597	0.075041	0.006219	0.000414	0.183589	0.494405	0.756734	1	0.012433	0.452549	0.670949	0.878574	0.984252	0.033154	0.279735	0.445089	0.688355	0.999171	0.565271	0.396352	0.004559	0.270203	0.507667	0.741815	0.999586	0.334853
0.391892	0.288288	0.31982	0.253394	0.248869	0.199095	0.009009	0.225225	0.45045	0.743243	1	0.027027	0.279279	0.576577	0.72973	0.959459	0.004505	0.220721	0.504505	0.756757	0.990991	0.36036	0.252252	0.387387	0.085973	0.067873	0.004525	0.004505	0.198198	0.405405	0.738739	1	0.144144	0.301802	0.522523	0.774775	0.981982	0.036036	0.337838	0.490991	0.675676	0.882883	0.432432	0.470588	0.027027	0.306306	0.536036	0.765766	0.981982	0.310811
0.31185	0.361746	0.326403	0.227083	0.220833	0.260417	0.014553	0.241164	0.54262	0.762994	1	0.004158	0.24948	0.480249	0.765073	0.997921	0.002079	0.251559	0.461538	0.700624	0.989605	0.392931	0.2079	0.399168	0.079167	0.083333	0	0.002079	0.328482	0.586279	0.804574	1	0.006237	0.147609	0.31185	0.569647	0.945946	0.035343	0.24948	0.532225	0.748441	0.966736	0.569647	0.420833	0.006237	0.253638	0.449064	0.654886	0.989605	0.388773
0.418605	0.348837	0.232558	0.3125	0.226562	0.1875	0.062016	0.325581	0.573643	0.821705	1	0.015504	0.186047	0.472868	0.744186	0.992248	0.007752	0.193798	0.410853	0.542636	0.945736	0.534884	0.139535	0.325581	0.0625	0.078125	0	0.007752	0.302326	0.697674	0.829457	1	0.023256	0.108527	0.147287	0.503876	0.914729	0.209302	0.27907	0.44186	0.565891	0.651163	0.387597	0.421875	0.015504	0.155039	0.372093	0.627907	0.829457	0.333333
0.394231	0.288462	0.317308	0.213592	0.271845	0.174757	0.019231	0.278846	0.461538	0.701923	0.990385	0.048077	0.173077	0.442308	0.721154	0.971154	0.009615	0.240385	0.490385	0.788462	1	0.326923	0.336538	0.336538	0.116505	0.058252	0.019417	0.009615	0.125	0.5	0.625	1	0.028846	0.153846	0.480769	0.692308	0.990385	0.259615	0.326923	0.413462	0.836538	0.951923	0.490385	0.407767	0.038462	0.211538	0.528846	0.730769	0.980769	0.269231
0.284133	0.398524	0.317343	0.203704	0.207407	0.248148	0.055351	0.383764	0.549815	0.789668	1	0.00738	0.199262	0.464945	0.734317	0.99262	0.00369	0.206642	0.453875	0.730627	0.98893	0.608856	0.321033	0.070111	0.1	0.040741	0.003704	0.00369	0.232472	0.542435	0.763838	1	0.01107	0.284133	0.494465	0.664207	0.95572	0.04059	0.051661	0.132841	0.457565	0.575646	0.538745	0.288889	0.01107	0.254613	0.542435	0.752768	0.9631	0.394834
0.311828	0.365591	0.322581	0.23913	0.184783	0.195652	0.043011	0.16129	0.451613	0.774194	1	0.021505	0.268817	0.645161	0.817204	0.978495	0.010753	0.258065	0.408602	0.602151	0.892473	0.505376	0.333333	0.16129	0.108696	0.043478	0.021739	0.010753	0.247312	0.731183	0.870968	1	0.258065	0.365591	0.483871	0.591398	0.774194	0.032258	0.107527	0.150538	0.193548	0.655914	0.451613	0.304348	0.096774	0.290323	0.451613	0.634409	0.903226	0.387097
0.301587	0.465608	0.232804	0.245583	0.130742	0.242049	0.003527	0.243386	0.530864	0.763668	1	0.005291	0.229277	0.446208	0.744268	0.998236	0.001764	0.326279	0.552028	0.723104	0.957672	0.679012	0.119929	0.201058	0.060071	0.053004	0	0.001764	0.296296	0.479718	0.797178	1	0.008818	0.522046	0.601411	0.723104	0.809524	0.012346	0.223986	0.287478	0.700176	0.885362	0.573192	0.279152	0.007055	0.291005	0.481481	0.768959	0.987654	0.433862
0.294872	0.394872	0.310256	0.254499	0.161954	0.290488	0.015385	0.241026	0.515385	0.751282	0.984615	0.005128	0.230769	0.461538	0.717949	0.992308	0.002564	0.274359	0.525641	0.748718	1	0.458974	0.079487	0.461538	0.046272	0.097686	0	0.002564	0.215385	0.45641	0.746154	1	0.153846	0.528205	0.825641	0.869231	0.997436	0.007692	0.264103	0.476923	0.710256	0.951282	0.466667	0.421594	0.007692	0.3	0.541026	0.753846	0.994872	0.369231
0.34375	0.330357	0.325893	0.215247	0.282511	0.206278	0.017857	0.245536	0.477679	0.799107	1	0.008929	0.200893	0.513393	0.709821	0.995536	0.004464	0.254464	0.482143	0.705357	0.9375	0.459821	0.379464	0.160714	0.116592	0.06278	0.008969	0.004464	0.325893	0.629464	0.821429	1	0.022321	0.209821	0.424107	0.607143	0.857143	0.089286	0.125	0.272321	0.732143	0.924107	0.40625	0.430493	0.026786	0.25	0.4375	0.651786	0.9375	0.370536
0.346626	0.297546	0.355828	0.252308	0.246154	0.209231	0.015337	0.257669	0.493865	0.766871	0.98773	0.006135	0.315951	0.54908	0.730061	0.996933	0.003067	0.205521	0.46319	0.733129	1	0.52454	0.288344	0.187117	0.104615	0.049231	0.012308	0.003067	0.248466	0.530675	0.794479	1	0.009202	0.282209	0.555215	0.717791	0.92638	0.033742	0.101227	0.389571	0.52454	0.993865	0.515337	0.387692	0.01227	0.322086	0.518405	0.757669	0.993865	0.297546
0.306159	0.519928	0.173913	0.255898	0.098004	0.179673	0.005435	0.213768	0.568841	0.894928	1	0.003623	0.32971	0.512681	0.679348	0.998188	0.001812	0.188406	0.356884	0.67029	0.869565	0.748188	0.067029	0.184783	0.029038	0.043557	0	0.001812	0.311594	0.498188	0.684783	1	0.012681	0.134058	0.197464	0.230072	0.873188	0.028986	0.257246	0.802536	0.858696	0.994565	0.375	0.290381	0.007246	0.175725	0.396739	0.686594	0.994565	0.54529
0.376682	0.32287	0.300448	0.265766	0.202703	0.198198	0.013453	0.215247	0.538117	0.834081	0.986547	0.040359	0.269058	0.529148	0.735426	1	0.004484	0.197309	0.430493	0.672646	0.946188	0.816143	0.06278	0.121076	0.036036	0.063063	0.018018	0.004484	0.273543	0.524664	0.744395	1	0.03139	0.071749	0.313901	0.457399	0.946188	0.026906	0.112108	0.327354	0.901345	0.982063	0.327354	0.432432	0.017937	0.224215	0.443946	0.64574	0.955157	0.376682
0.35461	0.248227	0.397163	0.192857	0.271429	0.178571	0.021277	0.205674	0.48227	0.723404	1	0.035461	0.35461	0.510638	0.702128	0.985816	0.007092	0.163121	0.475177	0.758865	0.978723	0.319149	0.148936	0.531915	0.05	0.092857	0.007143	0.007092	0.319149	0.446809	0.751773	1	0.120567	0.390071	0.48227	0.51773	0.787234	0.021277	0.184397	0.567376	0.702128	0.971631	0.489362	0.414286	0.021277	0.191489	0.510638	0.716312	0.971631	0.205674
0.37931	0.287931	0.332759	0.207254	0.253886	0.217617	0.005172	0.248276	0.482759	0.739655	1	0.003448	0.231034	0.546552	0.782759	0.998276	0.001724	0.258621	0.47069	0.722414	0.975862	0.422414	0.377586	0.2	0.1019	0.053541	0.018998	0.001724	0.284483	0.563793	0.782759	1	0.034483	0.263793	0.493103	0.72069	0.941379	0.043103	0.2	0.360345	0.658621	0.967241	0.439655	0.390328	0.012069	0.265517	0.489655	0.724138	0.948276	0.315517
0.298137	0.39929	0.302573	0.218472	0.175844	0.251332	0.002662	0.24756	0.515528	0.738243	0.997338	0.001775	0.273292	0.516415	0.755989	1	0.000887	0.222715	0.463177	0.753327	0.992014	0.470275	0.171251	0.358474	0.087922	0.07016	0.002664	0.000887	0.193434	0.488909	0.740018	1	0.007986	0.200532	0.416149	0.748891	0.994676	0.04614	0.345164	0.571429	0.781721	0.968944	0.512866	0.40675	0.003549	0.262644	0.512866	0.762201	0.992014	0.404614
0.213518	0.572965	0.213518	0.216923	0.103077	0.224615	0.010753	0.278034	0.460829	0.691244	0.990783	0.003072	0.204301	0.517665	0.752688	1	0.001536	0.310292	0.519201	0.803379	0.998464	0.726575	0.105991	0.167435	0.047692	0.032308	0.007692	0.001536	0.218126	0.579109	0.761905	1	0.225806	0.34255	0.44086	0.921659	0.996928	0.059908	0.248848	0.371736	0.511521	0.990783	0.572965	0.323077	0.00768	0.325653	0.56682	0.738863	0.998464	0.62212
0.359223	0.349515	0.291262	0.303922	0.137255	0.205882	0.048544	0.174757	0.466019	0.728155	1	0.019417	0.300971	0.485437	0.708738	0.980583	0.009709	0.223301	0.514563	0.757282	0.961165	0.601942	0.106796	0.291262	0.078431	0.078431	0	0.009709	0.165049	0.368932	0.640777	1	0.126214	0.291262	0.320388	0.427184	0.61165	0.038835	0.533981	0.757282	0.825243	0.951456	0.378641	0.372549	0.038835	0.320388	0.553398	0.805825	0.961165	0.330097
0.401198	0.365269	0.233533	0.259036	0.174699	0.180723	0.017964	0.215569	0.562874	0.856287	0.994012	0.011976	0.179641	0.39521	0.682635	1	0.005988	0.293413	0.508982	0.694611	0.958084	0.42515	0.281437	0.293413	0.078313	0.054217	0.018072	0.005988	0.131737	0.389222	0.54491	1	0.107784	0.227545	0.407186	0.718563	0.808383	0.047904	0.562874	0.640719	0.898204	0.976048	0.437126	0.325301	0.107784	0.275449	0.449102	0.694611	0.958084	0.341317
0.390071	0.37234	0.237589	0.245552	0.206406	0.19573	0.01773	0.241135	0.478723	0.765957	1	0.007092	0.280142	0.510638	0.670213	0.992908	0.003546	0.202128	0.475177	0.783688	0.98227	0.539007	0.280142	0.180851	0.092527	0.049822	0	0.003546	0.265957	0.496454	0.680851	1	0.08156	0.184397	0.453901	0.826241	0.985816	0.223404	0.386525	0.567376	0.787234	0.929078	0.379433	0.298932	0.031915	0.322695	0.570922	0.808511	0.98227	0.439716
0.493056	0.25	0.256944	0.300699	0.216783	0.090909	0.020833	0.166667	0.465278	0.770833	0.993056	0.013889	0.25	0.555556	0.743056	0.9375	0.006944	0.326389	0.479167	0.638889	1	0.597222	0.3125	0.090278	0.111888	0.027972	0	0.006944	0.145833	0.520833	0.819444	1	0.159722	0.270833	0.402778	0.527778	0.798611	0.673611	0.6875	0.708333	0.729167	0.979167	0.375	0.335664	0.180556	0.340278	0.520833	0.659722	0.979167	0.354167
0.413793	0.37931	0.206897	0.288184	0.149856	0.18732	0.011494	0.29023	0.482759	0.772989	0.971264	0.005747	0.238506	0.5	0.744253	1	0.002874	0.215517	0.436782	0.718391	0.994253	0.482759	0.20977	0.307471	0.074928	0.086455	0	0.002874	0.158046	0.408046	0.695402	1	0.126437	0.270115	0.594828	0.718391	0.994253	0.008621	0.310345	0.531609	0.795977	0.95977	0.399425	0.334294	0.020115	0.270115	0.531609	0.75	0.994253	0.41954
0.340467	0.330739	0.328794	0.206628	0.230019	0.216374	0.009728	0.233463	0.527237	0.741245	0.988327	0.003891	0.287938	0.480545	0.770428	1	0.001946	0.219844	0.474708	0.717899	0.994163	0.429961	0.18677	0.383268	0.072125	0.068226	0.005848	0.001946	0.27821	0.595331	0.784047	1	0.116732	0.268482	0.692607	0.848249	0.980545	0.009728	0.206226	0.414397	0.570039	0.957198	0.461089	0.440546	0.005837	0.264591	0.494163	0.712062	0.994163	0.33463
0.343023	0.488372	0.168605	0.303207	0.139942	0.107872	0.008721	0.203488	0.436047	0.630814	0.994186	0.005814	0.284884	0.659884	0.822674	1	0.002907	0.247093	0.415698	0.534884	0.947674	0.712209	0.168605	0.119186	0.061224	0.03207	0.002915	0.002907	0.194767	0.642442	0.819767	1	0.165698	0.27907	0.375	0.517442	0.613372	0.162791	0.223837	0.331395	0.459302	0.630814	0.514535	0.268222	0.046512	0.40407	0.697674	0.825581	0.994186	0.488372
0.407407	0.414141	0.178451	0.300676	0.148649	0.158784	0.006734	0.265993	0.555556	0.750842	1	0.010101	0.222222	0.521886	0.777778	0.986532	0.003367	0.191919	0.40404	0.535354	0.979798	0.690236	0.154882	0.154882	0.067568	0.047297	0	0.003367	0.26936	0.646465	0.818182	1	0.094276	0.272727	0.434343	0.491582	0.639731	0.03367	0.208754	0.383838	0.511785	0.905724	0.319865	0.324324	0.013468	0.222222	0.464646	0.649832	0.956229	0.417508
0.275641	0.474359	0.25	0.283871	0.141935	0.2	0.025641	0.166667	0.50641	0.75641	0.99359	0.019231	0.282051	0.532051	0.807692	1	0.00641	0.198718	0.435897	0.602564	0.846154	0.583333	0.108974	0.307692	0.032258	0.045161	0.006452	0.00641	0.230769	0.378205	0.852564	1	0.185897	0.205128	0.423077	0.448718	0.685897	0.076923	0.480769	0.557692	0.75641	0.833333	0.423077	0.322581	0.051282	0.365385	0.5	0.660256	0.903846	0.467949
0.45045	0.198198	0.351351	0.1	0.309091	0.118182	0.018018	0.171171	0.522523	0.765766	1	0.117117	0.207207	0.333333	0.468468	0.810811	0.009009	0.252252	0.594595	0.792793	0.990991	0.351351	0.171171	0.477477	0.072727	0.054545	0.018182	0.009009	0.171171	0.315315	0.684685	1	0.234234	0.261261	0.378378	0.720721	0.972973	0.081081	0.441441	0.558559	0.837838	0.963964	0.432432	0.381818	0.045045	0.261261	0.477477	0.72973	0.990991	0.198198
0.408318	0.302457	0.289225	0.227273	0.236742	0.185606	0.020794	0.238185	0.470699	0.73724	1	0.003781	0.293006	0.514178	0.776938	0.994329	0.00189	0.234405	0.512287	0.73535	0.996219	0.190926	0.069943	0.73913	0.022727	0.05303	0.003788	0.00189	0.480151	0.714556	0.829868	1	0.410208	0.470699	0.886578	0.969754	0.988658	0.009452	0.190926	0.379962	0.671078	0.952741	0.47259	0.401515	0.007561	0.383743	0.597353	0.780718	0.984877	0.293006
0.377203	0.359577	0.26322	0.289412	0.196471	0.188235	0.003525	0.303173	0.589894	0.804935	1	0.00235	0.19624	0.473561	0.772033	0.998825	0.001175	0.245593	0.427732	0.626322	0.992949	0.475911	0.115159	0.408931	0.048235	0.092941	0.005882	0.001175	0.26322	0.59577	0.835488	1	0.042303	0.229142	0.346651	0.459459	0.811986	0.024677	0.251469	0.502938	0.668625	0.943596	0.413631	0.329412	0.0047	0.20564	0.379553	0.596945	0.992949	0.374853
0.473118	0.311828	0.215054	0.293478	0.217391	0.119565	0.053763	0.215054	0.430108	0.763441	1	0.021505	0.247312	0.537634	0.752688	0.978495	0.010753	0.322581	0.419355	0.666667	0.946237	0.193548	0.043011	0.763441	0.021739	0.065217	0	0.010753	0.043011	0.677419	0.763441	1	0.709677	0.709677	0.72043	0.731183	0.741935	0.053763	0.225806	0.419355	0.645161	0.978495	0.258065	0.369565	0.075269	0.344086	0.548387	0.688172	0.946237	0.27957
0.340839	0.458547	0.200614	0.260246	0.143443	0.17418	0.002047	0.25998	0.54043	0.734903	0.993859	0.003071	0.209826	0.463664	0.730809	0.997953	0.001024	0.322416	0.511771	0.823951	1	0.699079	0.138178	0.162743	0.052254	0.042008	0.009221	0.001024	0.203685	0.462641	0.692938	1	0.030706	0.243603	0.467758	0.86694	0.986694	0.016377	0.437052	0.711361	0.912999	0.998976	0.392016	0.286885	0.013306	0.288639	0.490276	0.811668	0.995906	0.489253
0.417062	0.331754	0.251185	0.333333	0.166667	0.171429	0.014218	0.28436	0.601896	0.819905	1	0.009479	0.165877	0.417062	0.672986	0.990521	0.004739	0.255924	0.488152	0.649289	0.981043	0.488152	0.218009	0.293839	0.061905	0.071429	0.014286	0.004739	0.14218	0.421801	0.819905	1	0.123223	0.222749	0.364929	0.601896	0.672986	0.075829	0.488152	0.71564	0.78673	0.971564	0.374408	0.314286	0.042654	0.255924	0.407583	0.606635	0.981043	0.298578
0.375	0.359375	0.265625	0.285714	0.206349	0.222222	0.046875	0.25	0.5	0.8125	1	0.03125	0.109375	0.375	0.640625	0.9375	0.015625	0.3125	0.53125	0.71875	0.984375	0.71875	0.171875	0.109375	0.126984	0.063492	0	0.015625	0.234375	0.5625	0.734375	1	0.265625	0.28125	0.421875	0.53125	0.875	0.078125	0.078125	0.109375	0.78125	0.8125	0.28125	0.380952	0.265625	0.328125	0.53125	0.625	0.875	0.375
0.410909	0.381818	0.207273	0.29927	0.211679	0.149635	0.014545	0.250909	0.48	0.72	0.981818	0.007273	0.192727	0.436364	0.723636	1	0.003636	0.363636	0.607273	0.781818	0.996364	0.727273	0.036364	0.236364	0.021898	0.072993	0	0.003636	0.181818	0.432727	0.767273	1	0.807273	0.810909	0.872727	0.898182	0.909091	0.250909	0.356364	0.523636	0.661818	0.978182	0.243636	0.357664	0.010909	0.276364	0.549091	0.778182	0.985455	0.432727
0.293919	0.412162	0.293919	0.237288	0.166102	0.230508	0.010135	0.182432	0.5	0.780405	1	0.006757	0.243243	0.513514	0.72973	0.996622	0.003378	0.280405	0.476351	0.712838	0.97973	0.415541	0.162162	0.422297	0.047458	0.074576	0	0.003378	0.138514	0.425676	0.692568	1	0.226351	0.388514	0.456081	0.641892	0.726351	0.081081	0.283784	0.540541	0.831081	0.989865	0.533784	0.40678	0.013514	0.263514	0.489865	0.679054	0.983108	0.493243
0.412371	0.28866	0.298969	0.197917	0.21875	0.260417	0.030928	0.195876	0.42268	0.701031	0.979381	0.020619	0.268041	0.536082	0.783505	0.989691	0.010309	0.319588	0.515464	0.721649	1	0.216495	0	0.783505	0	0.0625	0	0.010309	0.453608	0.71134	0.762887	1	0	0	0	0	0	0.041237	0.226804	0.42268	0.670103	0.948454	0.309278	0.395833	0.061856	0.319588	0.56701	0.721649	0.969072	0.278351
0.360406	0.390863	0.248731	0.260204	0.188776	0.183673	0.045685	0.203046	0.451777	0.695431	0.989848	0.010152	0.258883	0.57868	0.791878	1	0.005076	0.213198	0.441624	0.639594	0.984772	0.598985	0.182741	0.218274	0.061224	0.040816	0	0.005076	0.269036	0.634518	0.80203	1	0.025381	0.441624	0.527919	0.675127	0.908629	0.096447	0.142132	0.19797	0.416244	0.614213	0.360406	0.326531	0.040609	0.35533	0.538071	0.86802	0.984772	0.390863
0.394737	0.324561	0.280702	0.221239	0.20354	0.176991	0.035088	0.236842	0.421053	0.754386	0.991228	0.026316	0.263158	0.535088	0.640351	1	0.008772	0.219298	0.5	0.763158	0.973684	0.403509	0.263158	0.333333	0.088496	0.070796	0.017699	0.008772	0.315789	0.508772	0.868421	1	0.04386	0.096491	0.447368	0.561404	0.824561	0.157895	0.22807	0.622807	0.701754	0.929825	0.438596	0.40708	0.026316	0.210526	0.45614	0.649123	0.973684	0.289474
0.265152	0.390152	0.344697	0.235741	0.174905	0.315589	0.018939	0.227273	0.560606	0.82197	0.992424	0.007576	0.295455	0.511364	0.80303	1	0.003788	0.204545	0.412879	0.628788	0.981061	0.496212	0.348485	0.155303	0.102662	0.064639	0.003802	0.003788	0.314394	0.579545	0.863636	1	0.011364	0.246212	0.409091	0.602273	0.962121	0.05303	0.094697	0.511364	0.768939	0.82197	0.481061	0.418251	0.011364	0.261364	0.454545	0.625	0.981061	0.412879
0.325	0.3875	0.2875	0.245283	0.169811	0.232704	0.01875	0.1875	0.4375	0.65	0.96875	0.0125	0.2625	0.48125	0.75625	0.99375	0.00625	0.26875	0.5375	0.78125	1	0.5125	0.375	0.1125	0.125786	0.037736	0	0.00625	0.2	0.3875	0.7375	1	0.09375	0.43125	0.55625	0.68125	0.9	0.01875	0.0375	0.06875	0.93125	0.9625	0.3875	0.477987	0.05	0.3125	0.50625	0.7375	0.98125	0.38125
0.452991	0.17094	0.376068	0.163793	0.284483	0.137931	0.025641	0.239316	0.512821	0.760684	0.991453	0.017094	0.222222	0.401709	0.675214	1	0.008547	0.273504	0.538462	0.74359	0.982906	0.376068	0.188034	0.435897	0.068966	0.103448	0	0.008547	0.094017	0.376068	0.675214	1	0.213675	0.273504	0.324786	0.700855	0.752137	0.111111	0.444444	0.57265	0.82906	0.957265	0.470085	0.37931	0.042735	0.307692	0.521368	0.726496	0.982906	0.188034
0.341667	0.308333	0.35	0.205021	0.246862	0.205021	0.008333	0.254167	0.475	0.745833	0.9875	0.029167	0.2	0.483333	0.795833	0.991667	0.004167	0.245833	0.525	0.725	1	0.491667	0.2875	0.220833	0.07113	0.054393	0.012552	0.004167	0.179167	0.470833	0.829167	1	0.016667	0.2125	0.329167	0.683333	0.983333	0.283333	0.391667	0.6	0.770833	0.925	0.45	0.32636	0.020833	0.320833	0.525	0.7	0.995833	0.354167
0.285996	0.491124	0.22288	0.225296	0.142292	0.195652	0.005917	0.211045	0.380671	0.571992	0.948718	0.003945	0.343195	0.678501	0.82643	1	0.001972	0.157791	0.386588	0.581854	0.968442	0.717949	0.072978	0.209073	0.029644	0.033597	0.005929	0.001972	0.317554	0.621302	0.820513	1	0.005917	0.289941	0.325444	0.378698	0.591716	0.017751	0.151874	0.262327	0.4714	0.66075	0.329389	0.3083	0.00789	0.149901	0.343195	0.518738	0.936884	0.506903
0.359649	0.302632	0.337719	0.237885	0.268722	0.193833	0.026316	0.223684	0.442982	0.688596	1	0.017544	0.302632	0.600877	0.798246	0.986842	0.004386	0.210526	0.447368	0.714912	0.995614	0.355263	0.20614	0.438596	0.070485	0.061674	0	0.004386	0.311404	0.627193	0.885965	1	0.013158	0.263158	0.438596	0.846491	0.973684	0.030702	0.144737	0.482456	0.596491	0.820175	0.517544	0.475771	0.008772	0.27193	0.52193	0.745614	0.969298	0.298246
0.349709	0.35682	0.293471	0.249677	0.209573	0.217982	0.003232	0.231416	0.499677	0.765999	0.998061	0.001293	0.264383	0.488688	0.745314	1	0.000646	0.247576	0.506141	0.741435	0.995475	0.472527	0.166774	0.360698	0.06533	0.069211	0.005821	0.000646	0.275372	0.455074	0.754363	1	0.019392	0.270847	0.461538	0.769231	0.960569	0.02521	0.173885	0.54234	0.734971	0.995475	0.528119	0.40621	0.001939	0.25404	0.500323	0.736264	0.996768	0.355527
0.315855	0.314607	0.369538	0.16625	0.25625	0.2475	0.006242	0.282147	0.526841	0.762797	0.998752	0.004994	0.23221	0.478152	0.736579	1	0.001248	0.230961	0.483146	0.745318	0.997503	0.475655	0.227216	0.297129	0.08875	0.05875	0.00625	0.001248	0.214732	0.453184	0.742821	1	0.03995	0.173533	0.414482	0.805243	0.997503	0.006242	0.343321	0.569288	0.732834	0.991261	0.570537	0.395	0.003745	0.260924	0.469413	0.736579	0.997503	0.333333
0.336538	0.331731	0.331731	0.2657	0.251208	0.217391	0.014423	0.230769	0.552885	0.778846	1	0.009615	0.221154	0.466346	0.745192	0.995192	0.004808	0.254808	0.480769	0.697115	0.947115	0.427885	0.384615	0.1875	0.130435	0.05314	0.004831	0.004808	0.274038	0.581731	0.793269	1	0.014423	0.298077	0.447115	0.629808	0.879808	0.081731	0.221154	0.567308	0.9375	0.985577	0.418269	0.444444	0.019231	0.240385	0.451923	0.677885	0.884615	0.360577
0.356955	0.370079	0.272966	0.226316	0.2	0.181579	0.007874	0.314961	0.608924	0.834646	0.997375	0.005249	0.160105	0.430446	0.658793	1	0.002625	0.257218	0.493438	0.708661	0.955381	0.614173	0.175853	0.209974	0.065789	0.039474	0.002632	0.002625	0.223097	0.490814	0.779528	1	0.115486	0.204724	0.446194	0.690289	0.818898	0.073491	0.278215	0.564304	0.750656	0.989501	0.364829	0.342105	0.010499	0.259843	0.480315	0.711286	0.955381	0.391076
0.324841	0.469214	0.205945	0.234043	0.134043	0.174468	0.006369	0.218684	0.41189	0.647558	1	0.012739	0.397028	0.636943	0.823779	0.995754	0.002123	0.133758	0.318471	0.564756	0.974522	0.683652	0.144374	0.171975	0.061702	0.048936	0.002128	0.002123	0.36518	0.622081	0.815287	1	0.070064	0.159236	0.269639	0.360934	0.974522	0.04034	0.178344	0.309979	0.456476	0.794055	0.484076	0.323404	0.065817	0.326964	0.539278	0.683652	0.976645	0.454352
0.52809	0.191011	0.280899	0.159091	0.284091	0.159091	0.033708	0.247191	0.516854	0.764045	1	0.022472	0.168539	0.337079	0.573034	0.876404	0.011236	0.325843	0.494382	0.752809	0.977528	0.247191	0	0.752809	0	0.090909	0	0.011236	0.191011	0.258427	0.550562	1	0	0	0	0	0	0.05618	0.314607	0.505618	0.752809	0.955056	0.393258	0.431818	0.089888	0.314607	0.483146	0.707865	0.977528	0.157303
0.317422	0.348449	0.334129	0.198565	0.236842	0.205742	0.011933	0.195704	0.47494	0.754177	0.988067	0.004773	0.288783	0.5179	0.71599	1	0.002387	0.23389	0.472554	0.74463	0.997613	0.417661	0.217184	0.365155	0.078947	0.064593	0.002392	0.002387	0.300716	0.53222	0.799523	1	0.114558	0.281623	0.539379	0.789976	0.983294	0.009547	0.195704	0.396181	0.625298	0.940334	0.560859	0.392344	0.009547	0.28401	0.4821	0.725537	0.990453	0.338902
0.284615	0.415385	0.3	0.224806	0.224806	0.263566	0.030769	0.215385	0.430769	0.646154	0.969231	0.015385	0.269231	0.530769	0.792308	1	0.007692	0.2	0.523077	0.730769	0.992308	0.315385	0.492308	0.192308	0.093023	0.046512	0	0.007692	0.107692	0.323077	0.746154	1	0.061538	0.246154	0.461538	0.6	0.723077	0.3	0.776923	0.823077	0.869231	0.953846	0.469231	0.418605	0.038462	0.238462	0.530769	0.730769	0.946154	0.430769
0.356917	0.427666	0.215417	0.27907	0.150106	0.174419	0.002112	0.192186	0.472017	0.731785	0.998944	0.006336	0.270327	0.589229	0.797254	1	0.001056	0.275607	0.43717	0.599789	0.997888	0.644139	0.105597	0.250264	0.039112	0.053911	0.003171	0.001056	0.210137	0.618796	0.829989	1	0.020063	0.372756	0.481521	0.582893	0.965153	0.040127	0.277719	0.407603	0.560718	0.800422	0.475185	0.325581	0.003168	0.319958	0.501584	0.739176	0.986272	0.451954
0.349372	0.332636	0.317992	0.234801	0.232704	0.192872	0.004184	0.177824	0.472803	0.723849	1	0.01046	0.330544	0.600418	0.834728	0.997908	0.002092	0.232218	0.439331	0.646444	0.972803	0.539749	0.123431	0.33682	0.052411	0.056604	0.002096	0.002092	0.320084	0.608787	0.834728	1	0.016736	0.23431	0.328452	0.650628	0.972803	0.006276	0.154812	0.399582	0.575314	0.799163	0.543933	0.343816	0.006276	0.286611	0.479079	0.73431	0.979079	0.368201
0.388158	0.282895	0.328947	0.208791	0.261538	0.18022	0.004386	0.256579	0.508772	0.780702	0.997807	0.017544	0.22807	0.482456	0.717105	1	0.002193	0.258772	0.486842	0.734649	0.995614	0.385965	0.184211	0.429825	0.076923	0.09011	0.002198	0.002193	0.298246	0.513158	0.758772	1	0.100877	0.254386	0.526316	0.774123	0.949561	0.006579	0.199561	0.440789	0.701754	0.989035	0.541667	0.408791	0.006579	0.267544	0.482456	0.717105	0.995614	0.285088
0.350482	0.379421	0.270096	0.267311	0.170692	0.219002	0.009646	0.220257	0.504823	0.78135	0.998392	0.003215	0.263666	0.493569	0.721865	0.977492	0.001608	0.249196	0.490354	0.734727	1	0.530547	0.162379	0.307074	0.062802	0.062802	0.00161	0.001608	0.226688	0.501608	0.721865	1	0.049839	0.28135	0.469453	0.553055	0.871383	0.028939	0.250804	0.564309	0.836013	0.996785	0.437299	0.347826	0.004823	0.245981	0.469453	0.70418	0.993569	0.419614
0.308355	0.391247	0.300398	0.248839	0.162575	0.246184	0.001989	0.28382	0.540451	0.780504	0.997347	0.001326	0.246684	0.465517	0.731432	0.998011	0.000663	0.232759	0.468833	0.736074	1	0.417109	0.288462	0.29443	0.105508	0.040478	0.001991	0.000663	0.210212	0.431034	0.756631	1	0.009947	0.145889	0.284483	0.418435	0.8687	0.554377	0.653183	0.737401	0.850796	0.998011	0.555703	0.353019	0.003316	0.232759	0.458886	0.695623	0.999337	0.403846
0.282051	0.389744	0.328205	0.21134	0.201031	0.257732	0.030769	0.307692	0.558974	0.764103	0.994872	0.010256	0.179487	0.425641	0.717949	1	0.005128	0.271795	0.476923	0.774359	0.989744	0.507692	0.4	0.092308	0.139175	0.036082	0.005155	0.005128	0.230769	0.482051	0.717949	1	0.035897	0.210256	0.425641	0.733333	0.933333	0.538462	0.589744	0.615385	0.953846	0.984615	0.512821	0.350515	0.025641	0.25641	0.45641	0.728205	0.989744	0.394872
0.337134	0.338762	0.324104	0.215159	0.226569	0.203749	0.001629	0.267915	0.548046	0.824104	0.999186	0.0057	0.245928	0.502443	0.732085	0.996743	0.000814	0.232899	0.459283	0.693811	1	0.324919	0.021987	0.653094	0.012225	0.106764	0.002445	0.000814	0.280945	0.577362	0.888436	1	0.006515	0.88355	0.925896	0.947068	0.960912	0.004072	0.23127	0.460912	0.672638	0.997557	0.496743	0.378158	0.004886	0.233713	0.440554	0.679153	0.995114	0.367264
0.410959	0.214612	0.374429	0.178899	0.348624	0.169725	0.013699	0.255708	0.484018	0.707763	1	0.009132	0.136986	0.60274	0.849315	0.968037	0.004566	0.246575	0.488584	0.69863	0.990868	0.365297	0.228311	0.406393	0.073394	0.055046	0	0.004566	0.228311	0.392694	0.844749	1	0.045662	0.260274	0.515982	0.757991	0.995434	0.127854	0.223744	0.575342	0.680365	0.885845	0.557078	0.449541	0.022831	0.242009	0.534247	0.767123	0.990868	0.210046
0.385185	0.377778	0.237037	0.276119	0.208955	0.216418	0.044444	0.281481	0.511111	0.8	1	0.02963	0.237037	0.4	0.711111	0.985185	0.007407	0.155556	0.577778	0.762963	0.955556	0.674074	0.17037	0.155556	0.052239	0.067164	0.022388	0.007407	0.2	0.37037	0.651852	1	0.022222	0.555556	0.822222	0.888889	0.933333	0.037037	0.459259	0.622222	0.718519	0.97037	0.377778	0.41791	0.022222	0.377778	0.474074	0.718519	0.985185	0.355556
0.262948	0.430279	0.306773	0.205589	0.165669	0.269461	0.00996	0.260956	0.569721	0.762948	0.992032	0.003984	0.233068	0.448207	0.760956	0.998008	0.001992	0.272908	0.523904	0.723108	1	0.464143	0.053785	0.482072	0.031936	0.087824	0	0.001992	0.223108	0.50996	0.826693	1	0.005976	0.103586	0.207171	0.958167	0.978088	0.031873	0.330677	0.498008	0.667331	0.918327	0.507968	0.359281	0.005976	0.298805	0.494024	0.669323	0.99004	0.444223
0.389831	0.313559	0.29661	0.247863	0.222222	0.179487	0.025424	0.237288	0.644068	0.822034	1	0.016949	0.279661	0.423729	0.652542	0.957627	0.008475	0.20339	0.415254	0.601695	0.983051	0.584746	0.186441	0.228814	0.08547	0.08547	0	0.008475	0.29661	0.610169	0.754237	1	0.254237	0.288136	0.432203	0.5	0.830508	0.101695	0.144068	0.20339	0.872881	0.974576	0.474576	0.273504	0.033898	0.279661	0.40678	0.59322	0.983051	0.279661
0.307159	0.422633	0.270208	0.24537	0.324074	0.203704	0.004619	0.233256	0.48037	0.745958	0.993072	0.002309	0.242494	0.491917	0.743649	1	0.006928	0.251732	0.498845	0.732102	0.995381	0.817552	0.182448	0	0.111111	0	0	0.002309	0.240185	0.48037	0.73903	1	0.057737	0.307159	0.575058	0.833718	0.979215	0	0	0	0	0	0.406467	0.74537	0.011547	0.254042	0.512702	0.732102	0.995381	0.602771
0.316294	0.400958	0.282748	0.216	0.16	0.232	0.00639	0.34984	0.63738	0.857827	1	0.003195	0.215655	0.460064	0.710863	0.996805	0.001597	0.201278	0.429712	0.635783	0.998403	0.416933	0.119808	0.463259	0.048	0.0864	0.0064	0.001597	0.217252	0.5	0.777955	1	0.004792	0.244409	0.378594	0.538339	0.99361	0.027157	0.303514	0.539936	0.771565	0.979233	0.485623	0.3552	0.004792	0.198083	0.408946	0.608626	0.998403	0.413738
0.296788	0.424142	0.27907	0.233925	0.149667	0.247228	0.00443	0.251384	0.417497	0.702104	0.993355	0.002215	0.241417	0.500554	0.730897	0.998893	0.001107	0.250277	0.554817	0.790698	1	0.728682	0.135105	0.136213	0.052106	0.043237	0.003326	0.001107	0.231451	0.440753	0.646733	1	0.045404	0.676633	0.787375	0.874862	0.991141	0.003322	0.178295	0.527132	0.82392	0.984496	0.334441	0.330377	0.005537	0.385382	0.677741	0.844961	0.996678	0.459579
0.301325	0.403974	0.294702	0.212625	0.186047	0.245847	0.009934	0.31457	0.533113	0.761589	0.993377	0.013245	0.195364	0.463576	0.741722	0.996689	0.003311	0.18543	0.450331	0.718543	1	0.576159	0.274834	0.149007	0.086379	0.039867	0.006645	0.003311	0.274834	0.576159	0.781457	1	0.15894	0.364238	0.556291	0.854305	0.970199	0.013245	0.046358	0.082781	0.221854	0.629139	0.596026	0.285714	0.023179	0.195364	0.450331	0.758278	0.976821	0.400662
0.312253	0.375494	0.312253	0.253968	0.190476	0.234127	0.01581	0.213439	0.426877	0.731225	0.956522	0.007905	0.3083	0.549407	0.810277	1	0.003953	0.229249	0.482213	0.695652	0.988142	0.442688	0.189723	0.367589	0.063492	0.063492	0	0.003953	0.367589	0.754941	0.885375	1	0.142292	0.201581	0.355731	0.719368	0.833992	0.01581	0.110672	0.407115	0.501976	0.889328	0.41502	0.388889	0.019763	0.225296	0.442688	0.648221	0.972332	0.387352
0.293907	0.46595	0.240143	0.240575	0.16158	0.149013	0.005376	0.277778	0.491039	0.783154	0.994624	0.008961	0.218638	0.507168	0.700717	1	0.001792	0.286738	0.464158	0.756272	0.987455	0.648746	0.200717	0.150538	0.071813	0.039497	0	0.001792	0.240143	0.505376	0.741935	1	0.005376	0.247312	0.417563	0.752688	0.987455	0.150538	0.318996	0.59319	0.731183	0.951613	0.546595	0.330341	0.003584	0.295699	0.528674	0.700717	0.991039	0.453405
0.328502	0.400966	0.270531	0.256659	0.159806	0.232446	0.007246	0.2343	0.449275	0.673913	0.985507	0.004831	0.277778	0.628019	0.823671	0.997585	0.002415	0.231884	0.422705	0.615942	1	0.669082	0.171498	0.15942	0.067797	0.038741	0	0.002415	0.270531	0.657005	0.823671	1	0.009662	0.176329	0.359903	0.536232	0.927536	0.111111	0.198068	0.381643	0.512077	0.652174	0.574879	0.2954	0.009662	0.316425	0.666667	0.809179	0.995169	0.437198
0.311321	0.367925	0.320755	0.227488	0.232227	0.246445	0.014151	0.264151	0.495283	0.787736	1	0.009434	0.193396	0.433962	0.75	0.990566	0.004717	0.311321	0.5	0.693396	0.957547	0.466981	0.386792	0.146226	0.137441	0.052133	0.004739	0.004717	0.212264	0.580189	0.820755	1	0.037736	0.306604	0.457547	0.636792	0.962264	0.108491	0.136792	0.273585	0.650943	0.910377	0.415094	0.454976	0.037736	0.264151	0.457547	0.683962	0.957547	0.386792
0.283228	0.476266	0.240506	0.242472	0.156894	0.206022	0.011076	0.193038	0.495253	0.727848	0.992089	0.003165	0.330696	0.525316	0.762658	1	0.001582	0.227848	0.447785	0.71519	0.988924	0.738924	0.053797	0.207278	0.034865	0.031696	0	0.001582	0.343354	0.528481	0.757911	1	0.026899	0.06962	0.099684	0.175633	0.563291	0.045886	0.231013	0.292722	0.935127	0.992089	0.664557	0.278922	0.025316	0.335443	0.599684	0.775316	0.988924	0.493671
0.333805	0.500707	0.165488	0.229462	0.135977	0.127479	0.004243	0.404526	0.643564	0.78925	0.998586	0.002829	0.190948	0.335219	0.635078	0.997171	0.001414	0.442716	0.571429	0.762376	1	0.677511	0.080622	0.241867	0.033994	0.028329	0	0.001414	0.171146	0.340877	0.644979	1	0.155587	0.463932	0.526167	0.585573	0.909477	0.359264	0.608204	0.725601	0.786421	0.862801	0.428571	0.271955	0.007072	0.356436	0.579915	0.865629	0.98727	0.489392
0.394231	0.288462	0.317308	0.262136	0.184466	0.262136	0.048077	0.259615	0.528846	0.701923	0.961538	0.019231	0.192308	0.5	0.759615	0.990385	0.009615	0.221154	0.451923	0.711538	1	0.375	0.201923	0.423077	0.097087	0.07767	0	0.009615	0.201923	0.519231	0.865385	1	0.173077	0.442308	0.490385	0.740385	0.817308	0.048077	0.144231	0.394231	0.605769	0.971154	0.442308	0.466019	0.028846	0.240385	0.471154	0.721154	0.971154	0.307692
0.328877	0.377005	0.294118	0.241287	0.184987	0.252011	0.005348	0.221925	0.508021	0.778075	1	0.010695	0.259358	0.513369	0.737968	0.991979	0.002674	0.262032	0.462567	0.695187	0.994652	0.524064	0.259358	0.216578	0.096515	0.053619	0.010724	0.002674	0.221925	0.435829	0.729947	1	0.072193	0.307487	0.526738	0.663102	0.997326	0.093583	0.165775	0.483957	0.874332	0.938503	0.497326	0.380697	0.010695	0.315508	0.513369	0.705882	0.994652	0.398396
0.336842	0.336842	0.326316	0.21164	0.259259	0.26455	0.021053	0.242105	0.478947	0.736842	1	0.010526	0.184211	0.431579	0.731579	0.984211	0.005263	0.321053	0.542105	0.757895	0.973684	0.405263	0.473684	0.121053	0.164021	0.037037	0.005291	0.005263	0.284211	0.589474	0.815789	1	0.010526	0.336842	0.531579	0.705263	0.978947	0.078947	0.1	0.242105	0.289474	0.736842	0.468421	0.507937	0.015789	0.257895	0.478947	0.726316	0.984211	0.342105
0.307143	0.321429	0.371429	0.150538	0.229391	0.25448	0.017857	0.221429	0.489286	0.807143	0.982143	0.007143	0.307143	0.553571	0.696429	1	0.003571	0.210714	0.460714	0.714286	0.989286	0.364286	0.175	0.460714	0.050179	0.09319	0	0.003571	0.189286	0.442857	0.721429	1	0.157143	0.317857	0.414286	0.621429	0.714286	0.007143	0.221429	0.510714	0.810714	0.992857	0.546429	0.401434	0.014286	0.246429	0.464286	0.678571	0.989286	0.328571
0.331288	0.323108	0.345603	0.196721	0.221311	0.239754	0.00818	0.155419	0.453988	0.744376	0.997955	0.00409	0.267894	0.476483	0.762781	1	0.002045	0.306748	0.535787	0.725971	0.989775	0.486708	0.167689	0.345603	0.063525	0.071721	0.006148	0.002045	0.128834	0.321063	0.650307	1	0.014315	0.425358	0.631902	0.764826	0.9182	0.01227	0.382413	0.560327	0.785276	0.99182	0.523517	0.364754	0.006135	0.333333	0.525562	0.766871	0.97955	0.359918
0.423529	0.294118	0.282353	0.261905	0.238095	0.178571	0.023529	0.2	0.494118	0.705882	0.988235	0.070588	0.188235	0.435294	0.729412	1	0.011765	0.305882	0.517647	0.788235	0.964706	0.623529	0.035294	0.341176	0.047619	0.071429	0	0.011765	0.152941	0.423529	0.811765	1	0.235294	0.235294	0.235294	0.247059	0.458824	0.305882	0.376471	0.635294	0.717647	0.905882	0.4	0.452381	0.129412	0.329412	0.6	0.764706	0.964706	0.258824
0.352941	0.333333	0.313725	0.230263	0.256579	0.243421	0.013072	0.254902	0.496732	0.751634	0.986928	0.03268	0.169935	0.339869	0.627451	0.993464	0.006536	0.359477	0.588235	0.79085	1	0.640523	0.176471	0.183007	0.052632	0.052632	0.013158	0.006536	0.169935	0.333333	0.575163	1	0.117647	0.503268	0.764706	0.810458	0.96732	0.019608	0.529412	0.633987	0.856209	0.901961	0.392157	0.394737	0.019608	0.267974	0.431373	0.718954	0.954248	0.339869
0.439535	0.32093	0.239535	0.261072	0.188811	0.181818	0.009302	0.25814	0.462791	0.748837	1	0.004651	0.181395	0.495349	0.723256	0.983721	0.002326	0.313953	0.54186	0.751163	0.953488	0.595349	0.15814	0.246512	0.072261	0.095571	0.002331	0.002326	0.197674	0.446512	0.755814	1	0.07907	0.506977	0.632558	0.772093	0.951163	0.016279	0.267442	0.372093	0.704651	0.990698	0.323256	0.344988	0.05814	0.27907	0.532558	0.723256	0.97907	0.330233
0.297189	0.369478	0.333333	0.229839	0.21371	0.258065	0.012048	0.26506	0.574297	0.815261	0.995984	0.008032	0.200803	0.425703	0.690763	1	0.004016	0.248996	0.506024	0.710843	0.951807	0.457831	0.321285	0.220884	0.108871	0.068548	0.004032	0.004016	0.220884	0.457831	0.682731	1	0.024096	0.180723	0.321285	0.526104	0.783133	0.405622	0.662651	0.835341	0.899598	0.955823	0.550201	0.330645	0.028112	0.269076	0.502008	0.706827	0.951807	0.365462
0.349921	0.349398	0.300681	0.237421	0.208071	0.21174	0.002095	0.193819	0.466213	0.751179	0.998428	0.003667	0.282347	0.521739	0.756417	1	0.000524	0.262441	0.511786	0.739654	0.999476	0.487166	0.110005	0.402829	0.045597	0.078092	0.005765	0.000524	0.194343	0.500786	0.732844	1	0.021477	0.243059	0.515977	0.638554	0.97957	0.008381	0.283918	0.489785	0.798848	0.997905	0.514929	0.368973	0.005238	0.276585	0.524882	0.728654	0.999476	0.374018
0.4	0.285714	0.314286	0.259615	0.221154	0.173077	0.028571	0.32381	0.552381	0.771429	0.990476	0.019048	0.266667	0.428571	0.752381	1	0.009524	0.180952	0.409524	0.695238	0.933333	0.361905	0.390476	0.247619	0.086538	0.009615	0.009615	0.009524	0.27619	0.466667	0.609524	1	0.038095	0.171429	0.266667	0.409524	0.704762	0.714286	0.761905	0.828571	0.885714	0.952381	0.390476	0.538462	0.057143	0.2	0.466667	0.72381	0.933333	0.257143
0.336788	0.357513	0.305699	0.270833	0.25	0.223958	0.015544	0.202073	0.476684	0.746114	0.994819	0.010363	0.243523	0.466321	0.725389	1	0.005181	0.274611	0.497409	0.735751	0.927461	0.440415	0.450777	0.108808	0.125	0.03125	0	0.005181	0.238342	0.590674	0.839378	1	0.020725	0.331606	0.497409	0.678756	0.932642	0.093264	0.11399	0.248705	0.274611	0.715026	0.440415	0.479167	0.025907	0.274611	0.476684	0.704663	0.937824	0.378238
0.437016	0.322674	0.24031	0.262852	0.200776	0.152279	0.002907	0.16376	0.40407	0.741279	0.998062	0.001938	0.286822	0.534884	0.761628	0.997093	0.000969	0.372093	0.545543	0.732558	1	0.496124	0.125969	0.377907	0.050436	0.075655	0.00582	0.000969	0.176357	0.356589	0.69186	1	0.008721	0.460271	0.57655	0.695736	0.999031	0.061047	0.371124	0.58624	0.793605	0.987403	0.392442	0.325897	0.007752	0.407946	0.552326	0.718023	0.997093	0.360465
0.283154	0.412186	0.304659	0.223022	0.183453	0.251799	0.089606	0.329749	0.551971	0.795699	1	0.007168	0.164875	0.405018	0.698925	0.992832	0.003584	0.318996	0.569892	0.756272	0.97491	0.483871	0.197133	0.318996	0.089928	0.082734	0.010791	0.003584	0.204301	0.523297	0.767025	1	0.007168	0.232975	0.508961	0.731183	0.939068	0.100358	0.293907	0.458781	0.655914	0.956989	0.451613	0.446043	0.010753	0.293907	0.530466	0.731183	0.971326	0.422939
0.329588	0.363296	0.307116	0.244361	0.221805	0.203008	0.011236	0.254682	0.456929	0.745318	0.988764	0.007491	0.277154	0.539326	0.7603	1	0.003745	0.235955	0.460674	0.689139	0.996255	0.434457	0.359551	0.205993	0.131579	0.033835	0.003759	0.003745	0.209738	0.498127	0.70412	1	0.097378	0.40824	0.595506	0.745318	0.925094	0.022472	0.161049	0.220974	0.940075	0.992509	0.509363	0.360902	0.014981	0.307116	0.520599	0.722846	0.985019	0.367041
0.364407	0.338983	0.29661	0.238298	0.255319	0.221277	0.012712	0.237288	0.466102	0.711864	0.995763	0.008475	0.241525	0.516949	0.745763	0.978814	0.004237	0.254237	0.521186	0.775424	1	0.355932	0.237288	0.40678	0.085106	0.051064	0	0.004237	0.25	0.54661	0.851695	1	0.042373	0.275424	0.5	0.737288	0.966102	0.118644	0.216102	0.461864	0.648305	0.877119	0.533898	0.451064	0.021186	0.245763	0.512712	0.745763	0.970339	0.29661
0.330189	0.386792	0.283019	0.266667	0.219048	0.171429	0.056604	0.226415	0.584906	0.792453	1	0.018868	0.254717	0.481132	0.773585	0.990566	0.009434	0.188679	0.386792	0.556604	0.95283	0.443396	0.556604	0	0.190476	0	0	0.009434	0.283019	0.528302	0.783019	1	0.018868	0.188679	0.396226	0.688679	0.962264	0	0	0	0	0	0.358491	0.495238	0.018868	0.188679	0.462264	0.688679	0.95283	0.386792
0.330579	0.342975	0.326446	0.257261	0.19917	0.219917	0.016529	0.231405	0.520661	0.768595	0.991736	0.012397	0.293388	0.508264	0.780992	1	0.004132	0.18595	0.438017	0.677686	0.995868	0.326446	0.090909	0.582645	0.037344	0.095436	0.004149	0.004132	0.173554	0.392562	0.772727	1	0.165289	0.793388	0.847107	0.867769	0.900826	0.049587	0.280992	0.483471	0.644628	0.983471	0.512397	0.373444	0.008264	0.247934	0.438017	0.64876	0.987603	0.326446
0.396226	0.313208	0.290566	0.25	0.280303	0.170455	0.011321	0.218868	0.520755	0.732075	0.996226	0.018868	0.332075	0.618868	0.811321	1	0.003774	0.215094	0.4	0.611321	0.992453	0.573585	0.113208	0.313208	0.083333	0.090909	0	0.003774	0.226415	0.460377	0.739623	1	0.05283	0.09434	0.264151	0.445283	0.992453	0.022642	0.407547	0.592453	0.8	0.916981	0.366038	0.484848	0.015094	0.237736	0.45283	0.70566	0.992453	0.339623
0.304239	0.448878	0.246883	0.2275	0.1525	0.2275	0.007481	0.304239	0.551122	0.775561	0.997506	0.009975	0.206983	0.438903	0.683292	0.985037	0.002494	0.244389	0.526185	0.795511	1	0.551122	0.084788	0.36409	0.055	0.075	0.01	0.002494	0.184539	0.531172	0.733167	1	0.029925	0.077307	0.798005	0.860349	0.937656	0.054863	0.289277	0.389027	0.665835	0.992519	0.553616	0.34	0.014963	0.256858	0.53616	0.700748	0.985037	0.428928
0.386805	0.331177	0.282018	0.244819	0.224093	0.176166	0.002587	0.296248	0.56533	0.805951	0.996119	0.005175	0.163001	0.454075	0.717982	1	0.001294	0.27555	0.468305	0.676585	0.997413	0.457956	0.119017	0.423027	0.049223	0.082902	0.005181	0.001294	0.151358	0.508409	0.745149	1	0.086675	0.269082	0.39586	0.534282	0.956016	0.056921	0.30401	0.567917	0.807245	0.997413	0.438551	0.352332	0.010349	0.240621	0.428202	0.610608	0.997413	0.362225
0.389423	0.269231	0.341346	0.175904	0.296386	0.192771	0.009615	0.206731	0.502404	0.778846	0.997596	0.004808	0.293269	0.46875	0.728365	1	0.002404	0.242788	0.509615	0.730769	0.995192	0.408654	0.204327	0.387019	0.06988	0.079518	0.007229	0.002404	0.286058	0.53125	0.783654	1	0.086538	0.25	0.483173	0.764423	0.951923	0.007212	0.194712	0.439904	0.692308	0.978365	0.543269	0.4	0.007212	0.264423	0.478365	0.704327	0.995192	0.288462
0.357827	0.359425	0.282748	0.2416	0.2176	0.1936	0.004792	0.204473	0.448882	0.720447	1	0.003195	0.21246	0.535144	0.765176	0.995208	0.001597	0.338658	0.539936	0.755591	0.998403	0.507987	0.159744	0.332268	0.0592	0.0752	0.0016	0.001597	0.13738	0.436102	0.670927	1	0.094249	0.246006	0.472843	0.803514	0.86901	0.047923	0.383387	0.619808	0.753994	0.996805	0.48722	0.4128	0.01278	0.27476	0.528754	0.782748	0.996805	0.394569
0.351598	0.410959	0.237443	0.284404	0.169725	0.155963	0.027397	0.237443	0.479452	0.721461	1	0.009132	0.242009	0.56621	0.780822	0.990868	0.004566	0.26484	0.474886	0.643836	0.876712	0.447489	0.077626	0.474886	0.045872	0.073394	0	0.004566	0.287671	0.561644	0.780822	1	0.045662	0.639269	0.666667	0.694064	0.744292	0.086758	0.219178	0.401826	0.60274	0.917808	0.420091	0.40367	0.050228	0.269406	0.520548	0.675799	0.90411	0.369863
0.431767	0.369128	0.199105	0.320628	0.183857	0.14574	0.008949	0.272931	0.512304	0.774049	1	0.004474	0.187919	0.42953	0.686801	0.975391	0.002237	0.304251	0.624161	0.753915	0.995526	0.753915	0.053691	0.192394	0.038117	0.05157	0.002242	0.002237	0.234899	0.427293	0.720358	1	0.053691	0.178971	0.199105	0.691275	0.832215	0.114094	0.608501	0.702461	0.760626	0.988814	0.373602	0.367713	0.013423	0.425056	0.58613	0.751678	0.995526	0.353468
0.349169	0.380048	0.270784	0.238095	0.209524	0.209524	0.007126	0.204276	0.434679	0.736342	0.997625	0.004751	0.301663	0.510689	0.745843	0.985748	0.002375	0.270784	0.534442	0.750594	1	0.551069	0.12114	0.327791	0.069048	0.097619	0.007143	0.002375	0.304038	0.527316	0.795724	1	0.199525	0.4038	0.672209	0.824228	0.997625	0.014252	0.168646	0.339667	0.700713	0.961995	0.427553	0.461905	0.009501	0.32304	0.513064	0.750594	0.990499	0.413302
0.312775	0.396476	0.290749	0.212389	0.199115	0.230088	0.008811	0.277533	0.506608	0.722467	1	0.013216	0.154185	0.475771	0.762115	0.995595	0.004405	0.286344	0.502203	0.726872	0.969163	0.348018	0.140969	0.511013	0.048673	0.084071	0.004425	0.004405	0.105727	0.30837	0.585903	1	0.013216	0.321586	0.444934	0.678414	0.726872	0.176211	0.365639	0.621145	0.85022	0.977974	0.488987	0.433628	0.013216	0.30837	0.515419	0.731278	0.951542	0.365639
0.341297	0.320819	0.337884	0.219178	0.236301	0.212329	0.010239	0.180887	0.47099	0.709898	1	0.047782	0.327645	0.525597	0.740614	0.982935	0.003413	0.211604	0.484642	0.788396	0.993174	0.34471	0.12628	0.52901	0.047945	0.082192	0.006849	0.003413	0.290102	0.505119	0.795222	1	0.296928	0.406143	0.706485	0.808874	0.938567	0.006826	0.167235	0.443686	0.665529	0.976109	0.556314	0.40411	0.006826	0.307167	0.522184	0.754266	0.982935	0.337884
0.356223	0.424893	0.218884	0.301724	0.116379	0.206897	0.012876	0.141631	0.381974	0.785408	1	0.008584	0.317597	0.532189	0.716738	0.995708	0.004292	0.304721	0.51073	0.695279	0.905579	0.429185	0.175966	0.39485	0.068966	0.068966	0.008621	0.004292	0.107296	0.270386	0.575107	1	0.2103	0.27897	0.339056	0.523605	0.60515	0.193133	0.618026	0.751073	0.88412	0.982833	0.454936	0.327586	0.038627	0.351931	0.553648	0.678112	0.918455	0.450644
0.386364	0.378788	0.234848	0.267176	0.160305	0.152672	0.037879	0.30303	0.560606	0.780303	0.992424	0.045455	0.25	0.537879	0.787879	1	0.007576	0.098485	0.310606	0.530303	0.833333	0.469697	0.19697	0.333333	0.061069	0.045802	0.015267	0.007576	0.295455	0.469697	0.878788	1	0.015152	0.212121	0.424242	0.5	0.818182	0.05303	0.128788	0.590909	0.674242	0.80303	0.310606	0.274809	0.022727	0.181818	0.416667	0.590909	0.863636	0.378788
0.34188	0.32906	0.32906	0.236052	0.236052	0.240343	0.025641	0.299145	0.508547	0.75641	0.995726	0.008547	0.15812	0.461538	0.679487	1	0.004274	0.252137	0.470085	0.747863	0.991453	0.461538	0.376068	0.162393	0.137339	0.034335	0	0.004274	0.153846	0.495726	0.75641	1	0.115385	0.444444	0.606838	0.82906	0.978632	0.025641	0.17094	0.213675	0.260684	0.512821	0.525641	0.377682	0.017094	0.277778	0.521368	0.764957	0.978632	0.299145
0.306748	0.431493	0.261759	0.260246	0.157787	0.22541	0.01227	0.237219	0.478528	0.756646	0.993865	0.00409	0.282209	0.552147	0.799591	1	0.002045	0.208589	0.443763	0.654397	0.99591	0.456033	0.0818	0.462168	0.030738	0.071721	0.006148	0.002045	0.247444	0.631902	0.875256	1	0.06135	0.198364	0.415133	0.640082	0.9182	0.006135	0.265849	0.476483	0.613497	0.936605	0.531697	0.307377	0.00818	0.229039	0.474438	0.683027	0.99591	0.451943
0.37234	0.297872	0.329787	0.215054	0.247312	0.193548	0.021277	0.212766	0.478723	0.755319	1	0.042553	0.329787	0.468085	0.670213	0.93617	0.010638	0.159574	0.510638	0.797872	0.968085	0.329787	0.297872	0.37234	0.107527	0.064516	0.021505	0.010638	0.148936	0.468085	0.606383	1	0.042553	0.106383	0.521277	0.659574	0.968085	0.170213	0.244681	0.340426	0.808511	0.93617	0.489362	0.430108	0.042553	0.234043	0.521277	0.712766	0.968085	0.276596
0.36	0.368	0.272	0.261044	0.212851	0.212851	0.012	0.316	0.544	0.744	0.964	0.008	0.244	0.468	0.708	0.996	0.004	0.18	0.46	0.776	1	0.596	0.056	0.348	0.040161	0.11245	0	0.004	0.192	0.476	0.796	1	0.04	0.048	0.292	0.928	0.988	0.068	0.328	0.508	0.668	0.908	0.452	0.393574	0.02	0.236	0.432	0.836	0.992	0.384
0.34375	0.320312	0.335938	0.267717	0.188976	0.251969	0.023438	0.242188	0.460938	0.757812	0.976562	0.015625	0.148438	0.445312	0.703125	0.953125	0.007812	0.273438	0.539062	0.773438	1	0.390625	0.140625	0.46875	0.07874	0.110236	0	0.007812	0.101562	0.476562	0.726562	1	0.273438	0.414062	0.625	0.789062	0.835938	0.03125	0.226562	0.5	0.867188	0.984375	0.523438	0.425197	0.046875	0.335938	0.53125	0.742188	0.984375	0.351562
0.459184	0.306122	0.234694	0.276923	0.220513	0.123077	0.015306	0.30102	0.566327	0.729592	1	0.010204	0.285714	0.678571	0.811224	0.979592	0.005102	0.158163	0.311224	0.489796	0.984694	0.576531	0.265306	0.158163	0.066667	0.025641	0.005128	0.005102	0.30102	0.69898	0.852041	1	0.096939	0.178571	0.270408	0.428571	0.785714	0.061224	0.464286	0.581633	0.622449	0.663265	0.321429	0.25641	0.020408	0.168367	0.260204	0.469388	0.984694	0.326531
0.37931	0.352087	0.268603	0.285455	0.198182	0.183636	0.00726	0.255898	0.537205	0.749546	0.994555	0.00363	0.232305	0.408348	0.709619	0.998185	0.001815	0.248639	0.53539	0.767695	1	0.540835	0.14882	0.310345	0.061818	0.065455	0.003636	0.001815	0.252269	0.439201	0.747731	1	0.041742	0.23775	0.491833	0.588022	0.807623	0.018149	0.274047	0.640653	0.833031	0.978221	0.459165	0.338182	0.010889	0.283122	0.586207	0.780399	0.983666	0.37931
0.376494	0.340637	0.282869	0.225549	0.213573	0.217565	0.003984	0.227092	0.51992	0.75498	0.994024	0.011952	0.260956	0.505976	0.729084	0.988048	0.001992	0.23506	0.464143	0.739044	1	0.511952	0.205179	0.282869	0.083832	0.051896	0	0.001992	0.241036	0.50996	0.798805	1	0.02988	0.173307	0.38247	0.59761	0.996016	0.053785	0.304781	0.569721	0.772908	0.98008	0.496016	0.335329	0.027888	0.268924	0.543825	0.800797	0.978088	0.344622
0.311649	0.461422	0.226929	0.254545	0.14697	0.215152	0.003026	0.267776	0.476551	0.74584	1	0.004539	0.249622	0.529501	0.747352	0.995461	0.001513	0.23298	0.459909	0.738275	0.996974	0.744327	0.125567	0.130106	0.062121	0.040909	0.001515	0.001513	0.29652	0.538578	0.742814	1	0.006051	0.231467	0.461422	0.856278	0.984871	0.055976	0.18003	0.26475	0.670197	0.910741	0.443268	0.336364	0.006051	0.22239	0.512859	0.771558	0.996974	0.458396
0.311248	0.436055	0.252696	0.226852	0.158951	0.231481	0.009245	0.249615	0.497689	0.742681	0.998459	0.003082	0.275809	0.530046	0.762712	1	0.001541	0.215716	0.454545	0.708783	0.989214	0.734977	0.104777	0.160247	0.046296	0.052469	0.003086	0.001541	0.300462	0.531587	0.745763	1	0.006163	0.228043	0.545455	0.864407	0.959938	0.01849	0.171032	0.337442	0.493066	0.924499	0.429892	0.330247	0.006163	0.223421	0.53775	0.781202	0.992296	0.428351
0.349515	0.378641	0.271845	0.343137	0.127451	0.254902	0.029126	0.300971	0.543689	0.728155	0.990291	0.019417	0.213592	0.524272	0.834951	1	0.009709	0.165049	0.398058	0.592233	0.883495	0.446602	0.349515	0.203883	0.137255	0.039216	0	0.009709	0.281553	0.660194	0.854369	1	0.038835	0.271845	0.543689	0.76699	0.902913	0.116505	0.15534	0.330097	0.378641	0.436893	0.368932	0.352941	0.038835	0.174757	0.436893	0.757282	0.912621	0.398058
0.352113	0.347418	0.300469	0.264151	0.226415	0.216981	0.018779	0.253521	0.497653	0.737089	0.976526	0.00939	0.220657	0.478873	0.769953	0.995305	0.004695	0.2723	0.488263	0.723005	1	0.525822	0.230047	0.244131	0.056604	0.056604	0.009434	0.004695	0.140845	0.41784	0.680751	1	0.201878	0.314554	0.539906	0.737089	0.929577	0.122066	0.366197	0.624413	0.830986	0.953052	0.441315	0.339623	0.164319	0.361502	0.558685	0.723005	0.948357	0.384977
0.300752	0.330827	0.368421	0.212121	0.181818	0.242424	0.045113	0.263158	0.443609	0.646617	0.954887	0.015038	0.225564	0.578947	0.774436	0.947368	0.007519	0.24812	0.458647	0.744361	1	0.353383	0.360902	0.285714	0.174242	0.05303	0.007576	0.007519	0.330827	0.56391	0.729323	1	0.18797	0.398496	0.541353	0.81203	0.992481	0.037594	0.097744	0.255639	0.323308	0.917293	0.466165	0.424242	0.030075	0.233083	0.556391	0.789474	0.992481	0.293233
0.354331	0.314961	0.330709	0.246032	0.285714	0.18254	0.015748	0.204724	0.464567	0.724409	1	0.086614	0.275591	0.480315	0.795276	0.984252	0.007874	0.23622	0.511811	0.700787	0.952756	0.472441	0.488189	0.03937	0.15873	0.015873	0	0.007874	0.307087	0.543307	0.795276	1	0.102362	0.251969	0.488189	0.700787	0.937008	0.023622	0.023622	0.031496	0.03937	0.055118	0.370079	0.47619	0.031496	0.181102	0.456693	0.700787	0.952756	0.354331
0.49115	0.314159	0.19469	0.263858	0.146341	0.144124	0.00885	0.387168	0.659292	0.80531	1	0.004425	0.227876	0.415929	0.630531	0.997788	0.002212	0.152655	0.311947	0.480088	0.993363	0.679204	0.141593	0.179204	0.042129	0.064302	0.002217	0.002212	0.334071	0.637168	0.807522	1	0.013274	0.121681	0.188053	0.455752	0.993363	0.050885	0.15708	0.307522	0.411504	0.942478	0.314159	0.252772	0.019912	0.154867	0.263274	0.418142	0.995575	0.387168
0.243816	0.498233	0.257951	0.216312	0.131206	0.262411	0.007067	0.212014	0.342756	0.650177	0.975265	0.010601	0.289753	0.54417	0.756184	1	0.003534	0.226148	0.508834	0.763251	0.992933	0.798587	0.120141	0.081272	0.056738	0.021277	0	0.003534	0.332155	0.55477	0.759717	1	0.120141	0.219081	0.279152	0.611307	0.992933	0.162544	0.176678	0.293286	0.314488	0.904594	0.572438	0.297872	0.021201	0.318021	0.55477	0.713781	0.992933	0.44523
0.306931	0.39604	0.29703	0.21	0.22	0.29	0.069307	0.306931	0.49505	0.861386	1	0.019802	0.158416	0.415842	0.693069	0.980198	0.009901	0.267327	0.514851	0.653465	0.990099	0.405941	0.178218	0.415842	0.06	0.04	0	0.009901	0.128713	0.405941	0.623762	1	0.069307	0.475248	0.524752	0.564356	0.663366	0.178218	0.267327	0.772277	0.871287	0.980198	0.445545	0.5	0.029703	0.237624	0.524752	0.693069	0.950495	0.39604
0.370466	0.365285	0.264249	0.246433	0.190661	0.18677	0.003886	0.198187	0.505181	0.759067	1	0.002591	0.25	0.477979	0.748705	0.998705	0.001295	0.304404	0.51943	0.720207	0.996114	0.512953	0.120466	0.36658	0.051881	0.077821	0.002594	0.001295	0.158031	0.387306	0.725389	1	0.091969	0.380829	0.550518	0.664508	0.954663	0.005181	0.340674	0.568653	0.80829	0.994819	0.42487	0.33463	0.005181	0.304404	0.496114	0.704663	0.996114	0.411917
0.467391	0.293478	0.23913	0.21978	0.21978	0.142857	0.021739	0.130435	0.380435	0.641304	0.98913	0.086957	0.423913	0.663043	0.804348	1	0.01087	0.282609	0.456522	0.652174	0.913043	0.663043	0.043478	0.293478	0.043956	0.043956	0	0.01087	0.163043	0.326087	0.619565	1	0.391304	0.391304	0.402174	0.413043	0.597826	0.456522	0.51087	0.75	0.826087	0.902174	0.347826	0.373626	0.293478	0.456522	0.652174	0.847826	0.945652	0.315217
0.41875	0.34375	0.2375	0.238994	0.220126	0.138365	0.05	0.25625	0.4875	0.75625	1	0.0125	0.225	0.63125	0.85625	0.98125	0.00625	0.15625	0.39375	0.56875	0.7625	0.69375	0.0875	0.21875	0.081761	0.069182	0.006289	0.00625	0.24375	0.50625	0.825	1	0.15	0.1625	0.43125	0.55625	0.625	0.10625	0.19375	0.3875	0.7	0.75625	0.3375	0.339623	0.025	0.18125	0.4125	0.58125	0.90625	0.34375
0.401961	0.294118	0.303922	0.237624	0.207921	0.178218	0.039216	0.27451	0.558824	0.735294	1	0.019608	0.22549	0.441176	0.794118	0.990196	0.009804	0.147059	0.45098	0.686275	0.892157	0.509804	0.196078	0.294118	0.089109	0.069307	0.009901	0.009804	0.215686	0.372549	0.647059	1	0.117647	0.284314	0.54902	0.686275	0.735294	0.029412	0.392157	0.470588	0.813725	0.892157	0.401961	0.356436	0.029412	0.176471	0.421569	0.686275	0.882353	0.27451
0.357942	0.328859	0.313199	0.226457	0.235426	0.215247	0.004474	0.234899	0.47651	0.758389	0.997763	0.008949	0.279642	0.52349	0.744966	1	0.002237	0.210291	0.480984	0.749441	0.991051	0.389262	0.120805	0.489933	0.053812	0.089686	0.004484	0.002237	0.395973	0.581655	0.780761	1	0.404922	0.57047	0.686801	0.847875	0.995526	0.011186	0.147651	0.322148	0.606264	0.98434	0.590604	0.331839	0.013423	0.232662	0.503356	0.711409	0.991051	0.357942
0.479532	0.251462	0.269006	0.264706	0.282353	0.158824	0.017544	0.216374	0.497076	0.748538	1	0.011696	0.204678	0.444444	0.80117	0.964912	0.005848	0.274854	0.48538	0.707602	0.976608	0.561404	0.105263	0.333333	0.052941	0.1	0.005882	0.005848	0.222222	0.561404	0.836257	1	0.064327	0.263158	0.292398	0.678363	0.97076	0.076023	0.339181	0.473684	0.701754	0.789474	0.415205	0.4	0.035088	0.28655	0.502924	0.730994	0.97076	0.263158
0.431818	0.272727	0.295455	0.172414	0.252874	0.195402	0.045455	0.215909	0.511364	0.715909	1	0.034091	0.25	0.465909	0.761364	0.897727	0.011364	0.159091	0.454545	0.738636	0.977273	0.261364	0	0.738636	0	0.091954	0	0.011364	0.170455	0.238636	0.545455	1	0	0	0	0	0	0.045455	0.329545	0.568182	0.75	0.954545	0.386364	0.413793	0.079545	0.306818	0.477273	0.704545	0.954545	0.25
0.330544	0.401674	0.267782	0.268908	0.205882	0.193277	0.012552	0.225941	0.506276	0.769874	1	0.008368	0.242678	0.543933	0.757322	0.995816	0.004184	0.251046	0.430962	0.623431	0.970711	0.322176	0.09205	0.585774	0.042017	0.109244	0	0.004184	0.175732	0.472803	0.790795	1	0.435146	0.76569	0.824268	0.853556	0.979079	0.029289	0.242678	0.447699	0.610879	0.953975	0.485356	0.352941	0.050209	0.242678	0.439331	0.65272	0.970711	0.426778
0.323432	0.313531	0.363036	0.198675	0.264901	0.235099	0.009901	0.287129	0.570957	0.805281	0.993399	0.006601	0.240924	0.485149	0.752475	1	0.0033	0.191419	0.452145	0.653465	0.976898	0.478548	0.356436	0.165017	0.112583	0.05298	0.006623	0.0033	0.346535	0.646865	0.854785	1	0.013201	0.20462	0.379538	0.554455	0.980198	0.115512	0.155116	0.514851	0.729373	0.778878	0.50165	0.377483	0.013201	0.247525	0.448845	0.627063	0.983498	0.369637
0.330909	0.334545	0.334545	0.19708	0.229927	0.226277	0.010909	0.247273	0.501818	0.763636	1	0.007273	0.236364	0.487273	0.741818	0.970909	0.003636	0.265455	0.494545	0.723636	0.985455	0.370909	0.178182	0.450909	0.051095	0.10219	0	0.003636	0.181818	0.458182	0.705455	1	0.152727	0.305455	0.392727	0.603636	0.698182	0.007273	0.261818	0.509091	0.818182	0.992727	0.541818	0.394161	0.018182	0.247273	0.469091	0.669091	0.985455	0.341818
0.34205	0.354603	0.303347	0.237049	0.206698	0.21978	0.002615	0.239017	0.496339	0.745293	0.999477	0.001046	0.289749	0.526674	0.758891	1	0.000523	0.221757	0.462343	0.748954	0.998431	0.492678	0.106695	0.400628	0.048666	0.081109	0.002616	0.000523	0.312762	0.535565	0.737448	1	0.002615	0.244247	0.401151	0.573745	0.98431	0.018305	0.194561	0.5	0.804916	0.996339	0.529812	0.376766	0.001569	0.247385	0.508368	0.749477	0.998431	0.379184
0.408616	0.287206	0.304178	0.206536	0.257516	0.151634	0.003916	0.206266	0.44517	0.712794	1	0.016971	0.25718	0.493473	0.776762	0.994778	0.001305	0.304178	0.549608	0.746736	0.997389	0.314621	0.056136	0.629243	0.019608	0.103268	0.006536	0.001305	0.165796	0.315927	0.72846	1	0.005222	0.10705	0.139687	0.219321	0.875979	0.02611	0.368146	0.575718	0.772846	0.992167	0.456919	0.381699	0.022193	0.399478	0.58094	0.775457	0.997389	0.313316
0.324176	0.516484	0.159341	0.297521	0.101928	0.121212	0.008242	0.362637	0.60989	0.791209	1	0.005495	0.17033	0.46978	0.752747	0.991758	0.002747	0.252747	0.379121	0.612637	0.997253	0.835165	0.131868	0.032967	0.046832	0.019284	0.008264	0.002747	0.285714	0.574176	0.785714	1	0.065934	0.25	0.296703	0.376374	0.994505	0.008242	0.013736	0.021978	0.343407	0.71978	0.318681	0.292011	0.010989	0.137363	0.35989	0.642857	0.994505	0.53022
0.3475	0.305	0.3475	0.20802	0.245614	0.213033	0.01	0.2775	0.505	0.7875	1	0.0075	0.19	0.43	0.705	0.9975	0.0025	0.2625	0.5225	0.7625	0.985	0.345	0.0925	0.5625	0.0401	0.120301	0.005013	0.0025	0.225	0.425	0.735	1	0.055	0.115	0.1975	0.29	0.36	0.01	0.4	0.5875	0.775	0.985	0.545	0.41604	0.015	0.27	0.4625	0.6975	0.98	0.31
0.373093	0.278779	0.348128	0.197222	0.265278	0.211111	0.004161	0.235784	0.507628	0.732316	1	0.002774	0.242718	0.460472	0.743412	0.998613	0.001387	0.259362	0.503467	0.753121	0.997226	0.436893	0.238558	0.324549	0.0875	0.059722	0.004167	0.001387	0.231623	0.43828	0.705964	1	0.074896	0.208044	0.47018	0.897365	0.997226	0.008322	0.327323	0.615811	0.754508	0.883495	0.532594	0.372222	0.005548	0.280166	0.499307	0.750347	0.997226	0.29681
0.356877	0.27881	0.364312	0.179104	0.253731	0.19403	0.01487	0.219331	0.449814	0.743494	0.992565	0.05948	0.263941	0.513011	0.750929	0.988848	0.003717	0.241636	0.509294	0.728625	1	0.35316	0.182156	0.464684	0.052239	0.097015	0	0.003717	0.167286	0.416357	0.695167	1	0.171004	0.330855	0.431227	0.635688	0.732342	0.01487	0.237918	0.524164	0.825279	0.996283	0.550186	0.425373	0.011152	0.256506	0.472119	0.680297	0.98513	0.282528
0.315018	0.43956	0.245421	0.294118	0.154412	0.1875	0.007326	0.21978	0.424908	0.695971	0.981685	0.010989	0.227106	0.567766	0.81685	1	0.003663	0.249084	0.472527	0.699634	0.989011	0.626374	0.113553	0.260073	0.036765	0.051471	0	0.003663	0.186813	0.520147	0.842491	1	0.054945	0.527473	0.630037	0.688645	0.791209	0.091575	0.289377	0.380952	0.575092	0.74359	0.347985	0.352941	0.018315	0.201465	0.538462	0.699634	0.989011	0.428571
0.365217	0.243478	0.391304	0.175439	0.289474	0.175439	0.026087	0.234783	0.504348	0.695652	1	0.034783	0.217391	0.426087	0.686957	0.991304	0.008696	0.278261	0.565217	0.756522	0.956522	0.417391	0.156522	0.426087	0.052632	0.087719	0	0.008696	0.2	0.356522	0.721739	1	0.286957	0.313043	0.426087	0.46087	0.782609	0.078261	0.478261	0.6	0.869565	0.982609	0.46087	0.368421	0.052174	0.321739	0.556522	0.747826	0.982609	0.217391
0.321192	0.423841	0.254967	0.285714	0.152824	0.182724	0.009934	0.208609	0.433775	0.692053	0.996689	0.006623	0.400662	0.645695	0.847682	1	0.003311	0.195364	0.347682	0.52649	0.983444	0.65894	0.082781	0.258278	0.043189	0.036545	0.003322	0.003311	0.370861	0.668874	0.834437	1	0.013245	0.046358	0.413907	0.453642	0.662252	0.062914	0.182119	0.248344	0.39404	0.516556	0.337748	0.378738	0.019868	0.254967	0.466887	0.68543	0.986755	0.47351
0.38257	0.293944	0.323486	0.189349	0.275148	0.186391	0.004431	0.221566	0.48449	0.747415	0.998523	0.005908	0.233383	0.487445	0.70901	0.986706	0.001477	0.271787	0.530281	0.778434	1	0.370753	0.053176	0.576071	0.022189	0.093195	0.007396	0.001477	0.1226	0.478582	0.60709	1	0.007386	0.225997	0.472674	0.59675	0.865583	0.033973	0.307238	0.610044	0.802068	0.997046	0.462334	0.473373	0.007386	0.261448	0.508124	0.751846	0.997046	0.302806
0.388889	0.277778	0.333333	0.191011	0.292135	0.168539	0.066667	0.188889	0.455556	0.788889	1	0.022222	0.177778	0.411111	0.655556	0.977778	0.011111	0.277778	0.544444	0.733333	0.988889	0.155556	0	0.844444	0	0.067416	0	0.011111	0.033333	0.366667	0.755556	1	0	0	0	0	0	0.055556	0.255556	0.511111	0.722222	0.977778	0.411111	0.426966	0.088889	0.266667	0.477778	0.633333	0.977778	0.288889
0.254274	0.433761	0.311966	0.199143	0.164882	0.256959	0.008547	0.205128	0.472222	0.688034	0.995726	0.004274	0.284188	0.529915	0.775641	1	0.002137	0.237179	0.474359	0.711538	0.991453	0.523504	0.277778	0.198718	0.098501	0.051392	0.004283	0.002137	0.25	0.527778	0.728632	1	0.070513	0.331197	0.510684	0.720085	0.991453	0.010684	0.134615	0.288462	0.878205	0.942308	0.49359	0.342612	0.012821	0.232906	0.435897	0.683761	0.991453	0.463675
0.282187	0.414462	0.303351	0.261484	0.146643	0.257951	0.005291	0.276896	0.520282	0.77425	1	0.003527	0.231041	0.472663	0.719577	0.998236	0.001764	0.252205	0.516755	0.768959	0.996473	0.640212	0.097002	0.262787	0.045936	0.060071	0	0.001764	0.262787	0.483245	0.77425	1	0.08642	0.183422	0.557319	0.737213	0.846561	0.003527	0.174603	0.5097	0.707231	0.991182	0.619048	0.29682	0.007055	0.216931	0.465608	0.673721	0.994709	0.45679
0.371046	0.298054	0.3309	0.200974	0.257004	0.192448	0.00365	0.248175	0.508516	0.770073	0.997567	0.004866	0.233577	0.479319	0.733577	1	0.001217	0.26764	0.504866	0.734793	0.995134	0.289538	0.023114	0.687348	0.00609	0.079172	0.008526	0.001217	0.403893	0.639903	0.829684	1	0.3382	0.341849	0.424574	0.906326	0.958637	0.012165	0.201946	0.437956	0.698297	0.993917	0.467153	0.46285	0.004866	0.257908	0.502433	0.731144	0.995134	0.33455
0.343239	0.457652	0.199108	0.303571	0.147321	0.205357	0.004458	0.245171	0.534918	0.77266	1	0.002972	0.254086	0.46211	0.728083	0.998514	0.001486	0.228826	0.518574	0.738484	0.997028	0.7474	0.069837	0.182764	0.041667	0.056548	0	0.001486	0.239227	0.485884	0.725111	1	0.040119	0.213967	0.322437	0.410104	0.863299	0.005944	0.460624	0.655275	0.845468	0.962853	0.43685	0.404762	0.008915	0.213967	0.420505	0.686478	0.997028	0.502229
0.407035	0.40201	0.190955	0.328283	0.181818	0.156566	0.015075	0.256281	0.472362	0.718593	1	0.01005	0.276382	0.59799	0.824121	0.98995	0.005025	0.140704	0.376884	0.633166	0.984925	0.160804	0	0.839196	0	0.090909	0	0.005025	0.221106	0.572864	0.81407	1	0	0	0	0	0	0.035176	0.256281	0.477387	0.713568	0.984925	0.331658	0.434343	0.035176	0.155779	0.442211	0.648241	0.984925	0.417085
0.354331	0.275591	0.370079	0.174603	0.277778	0.222222	0.023622	0.19685	0.511811	0.755906	1	0.047244	0.307087	0.417323	0.637795	0.976378	0.007874	0.23622	0.519685	0.732283	0.968504	0.440945	0.267717	0.291339	0.079365	0.063492	0	0.007874	0.188976	0.440945	0.76378	1	0.023622	0.110236	0.566929	0.787402	0.858268	0.204724	0.267717	0.511811	0.692913	0.984252	0.566929	0.31746	0.031496	0.267717	0.472441	0.708661	0.968504	0.267717
0.310498	0.349644	0.339858	0.203918	0.195013	0.249332	0.005338	0.262456	0.589858	0.852313	0.99911	0.001779	0.246441	0.508007	0.72242	1	0.00089	0.231317	0.440391	0.629893	0.989324	0.463523	0.079181	0.457295	0.042743	0.060552	0.005343	0.00089	0.230427	0.577402	0.763345	1	0.05427	0.184164	0.38879	0.802491	0.991993	0.004448	0.293594	0.468861	0.647687	0.985765	0.531139	0.343722	0.003559	0.236655	0.424377	0.633452	0.989324	0.387011
0.352818	0.304802	0.34238	0.23431	0.246862	0.209205	0.008351	0.265136	0.494781	0.734864	0.997912	0.004175	0.22547	0.448852	0.707724	0.987474	0.002088	0.26096	0.542797	0.76618	1	0.384134	0.150313	0.465553	0.046025	0.079498	0.012552	0.002088	0.181628	0.379958	0.653445	1	0.025052	0.087683	0.31524	0.390397	0.876827	0.098121	0.463466	0.636743	0.826722	0.991649	0.517745	0.410042	0.014614	0.308977	0.551148	0.76618	0.991649	0.327766
0.322733	0.332155	0.345112	0.179245	0.241745	0.233491	0.008245	0.246172	0.510012	0.765607	1	0.002356	0.229682	0.452297	0.694935	0.997644	0.001178	0.268551	0.512367	0.755006	0.994111	0.54417	0.193168	0.262662	0.070755	0.063679	0.004717	0.001178	0.241461	0.512367	0.742049	1	0.017668	0.206125	0.614841	0.871614	0.997644	0.034158	0.338045	0.425206	0.607774	0.982332	0.491166	0.365566	0.005889	0.246172	0.491166	0.718492	0.995289	0.334511
0.372028	0.27972	0.348252	0.186275	0.289916	0.180672	0.002797	0.255944	0.472727	0.727273	0.997203	0.005594	0.237762	0.507692	0.759441	0.979021	0.001399	0.233566	0.52028	0.765035	1	0.374825	0.177622	0.447552	0.079832	0.07423	0.018207	0.001399	0.255944	0.444755	0.73007	1	0.102098	0.325874	0.521678	0.770629	0.916084	0.004196	0.198601	0.545455	0.738462	0.998601	0.574825	0.420168	0.006993	0.276923	0.545455	0.767832	0.995804	0.257343
0.336683	0.38191	0.281407	0.212121	0.191919	0.217172	0.015075	0.180905	0.422111	0.738693	0.98995	0.045226	0.286432	0.592965	0.743719	1	0.005025	0.19598	0.467337	0.758794	0.994975	0.432161	0.341709	0.226131	0.141414	0.040404	0	0.005025	0.241206	0.603015	0.743719	1	0.01005	0.150754	0.472362	0.653266	0.994975	0.251256	0.301508	0.38191	0.829146	0.919598	0.60804	0.353535	0.01005	0.231156	0.472362	0.728643	0.994975	0.38191
0.366935	0.290323	0.342742	0.202429	0.259109	0.186235	0.012097	0.254032	0.504032	0.778226	0.991935	0.008065	0.225806	0.495968	0.721774	0.951613	0.004032	0.258065	0.46371	0.717742	1	0.41129	0.157258	0.431452	0.076923	0.097166	0.004049	0.004032	0.189516	0.370968	0.701613	0.967742	0.193548	0.334677	0.540323	0.737903	0.939516	0.028226	0.278226	0.548387	0.790323	1	0.53629	0.380567	0.020161	0.334677	0.516129	0.725806	0.995968	0.322581
0.230548	0.400576	0.368876	0.190751	0.138728	0.280347	0.014409	0.305476	0.550432	0.806916	0.997118	0.005764	0.262248	0.585014	0.832853	1	0.002882	0.195965	0.414986	0.590778	0.945245	0.524496	0.04611	0.429395	0.026012	0.066474	0.00289	0.002882	0.282421	0.67147	0.841499	1	0.291066	0.314121	0.325648	0.792507	0.948127	0.014409	0.184438	0.458213	0.582133	0.92219	0.634006	0.265896	0.008646	0.207493	0.466859	0.659942	0.979827	0.409222
0.385621	0.281046	0.333333	0.210526	0.296053	0.171053	0.013072	0.24183	0.48366	0.738562	1	0.019608	0.20915	0.457516	0.764706	0.954248	0.006536	0.254902	0.490196	0.705882	0.980392	0.150327	0	0.849673	0	0.052632	0	0.006536	0.222222	0.816993	0.856209	1	0	0	0	0	0	0.019608	0.24183	0.457516	0.699346	0.986928	0.411765	0.460526	0.039216	0.254902	0.555556	0.75817	0.980392	0.281046
0.167526	0.376289	0.456186	0.108527	0.129199	0.377261	0.005155	0.304124	0.515464	0.811856	0.997423	0.023196	0.283505	0.479381	0.744845	0.981959	0.002577	0.206186	0.484536	0.731959	1	0.157216	0	0.842784	0	0.072351	0	0.002577	0.39433	0.484536	0.747423	1	0	0	0	0	0	0.007732	0.237113	0.510309	0.744845	0.974227	0.835052	0.087855	0.010309	0.242268	0.505155	0.744845	0.969072	0.35567
0.248322	0.503356	0.248322	0.244395	0.112108	0.213004	0.004474	0.315436	0.548098	0.767338	1	0.008949	0.212528	0.438479	0.713647	0.995526	0.002237	0.263982	0.512304	0.814318	0.997763	0.595078	0.219239	0.185682	0.071749	0.053812	0.004484	0.002237	0.243848	0.525727	0.702461	1	0.261745	0.391499	0.597315	0.930649	0.997763	0.006711	0.111857	0.210291	0.630872	0.899329	0.447427	0.313901	0.006711	0.272931	0.501119	0.818792	0.997763	0.534676
0.319838	0.360324	0.319838	0.212982	0.206897	0.249493	0.006073	0.188259	0.491903	0.722672	1	0.004049	0.265182	0.493927	0.742915	0.997976	0.002024	0.259109	0.51417	0.755061	0.995951	0.317814	0.09919	0.582996	0.046653	0.103448	0.002028	0.002024	0.214575	0.406883	0.698381	1	0.048583	0.129555	0.259109	0.354251	0.912955	0.008097	0.378543	0.55668	0.785425	0.989879	0.619433	0.381339	0.008097	0.261134	0.467611	0.734818	0.98583	0.374494
0.332673	0.362376	0.30495	0.238095	0.19246	0.25	0.019802	0.273267	0.564356	0.79604	1	0.005941	0.20396	0.467327	0.742574	0.994059	0.00198	0.259406	0.481188	0.720792	0.992079	0.419802	0.231683	0.348515	0.097222	0.065476	0.005952	0.00198	0.283168	0.530693	0.770297	1	0.005941	0.158416	0.382178	0.49901	0.908911	0.027723	0.267327	0.564356	0.849505	0.994059	0.625743	0.333333	0.00396	0.227723	0.459406	0.70099	0.992079	0.370297
0.300654	0.346405	0.352941	0.263158	0.223684	0.197368	0.019608	0.267974	0.496732	0.72549	0.980392	0.026144	0.235294	0.45098	0.751634	0.986928	0.006536	0.196078	0.522876	0.732026	1	0.45098	0.30719	0.24183	0.098684	0.059211	0.006579	0.006536	0.248366	0.588235	0.784314	1	0.039216	0.124183	0.385621	0.51634	0.69281	0.287582	0.339869	0.718954	0.816993	0.921569	0.542484	0.394737	0.026144	0.248366	0.464052	0.712418	0.973856	0.366013
0.291139	0.35443	0.35443	0.230769	0.205128	0.217949	0.025316	0.316456	0.405063	0.556962	0.987342	0.037975	0.506329	0.64557	0.810127	1	0.012658	0.139241	0.303797	0.658228	0.962025	0.417722	0.151899	0.43038	0.051282	0.051282	0.025641	0.012658	0.531646	0.632911	0.810127	1	0.443038	0.64557	0.683544	0.873418	0.911392	0.025316	0.113924	0.227848	0.329114	0.936709	0.481013	0.410256	0.063291	0.164557	0.455696	0.683544	0.962025	0.468354
0.185714	0.357143	0.457143	0.144928	0.173913	0.26087	0.085714	0.171429	0.314286	0.628571	0.957143	0.057143	0.242857	0.585714	0.8	0.942857	0.014286	0.271429	0.5	0.657143	1	0.471429	0.2	0.328571	0.072464	0.043478	0.072464	0.014286	0.271429	0.714286	0.828571	1	0.042857	0.071429	0.128571	0.214286	0.914286	0.357143	0.442857	0.528571	0.614286	0.9	0.614286	0.492754	0.042857	0.342857	0.542857	0.742857	0.971429	0.357143
0.367347	0.319728	0.312925	0.225256	0.215017	0.21843	0.02381	0.227891	0.544218	0.778912	1	0.006803	0.302721	0.510204	0.765306	0.993197	0.003401	0.214286	0.438776	0.683673	0.94898	0.312925	0.085034	0.602041	0.020478	0.075085	0.03413	0.003401	0.27551	0.520408	0.891156	1	0.034014	0.176871	0.22449	0.431973	0.472789	0.068027	0.285714	0.557823	0.755102	0.989796	0.438776	0.409556	0.013605	0.22449	0.414966	0.62585	0.94898	0.316327
0.316327	0.316327	0.367347	0.226804	0.185567	0.257732	0.020408	0.387755	0.683673	0.816327	0.979592	0.040816	0.234694	0.44898	0.714286	1	0.010204	0.132653	0.336735	0.612245	0.908163	0.489796	0.204082	0.306122	0.113402	0.051546	0.010309	0.010204	0.27551	0.408163	0.714286	1	0.367347	0.489796	0.581633	0.663265	0.765306	0.030612	0.091837	0.173469	0.846939	0.928571	0.459184	0.371134	0.040816	0.142857	0.306122	0.632653	0.908163	0.367347
0.2375	0.4375	0.325	0.21519	0.177215	0.291139	0.075	0.1875	0.4375	0.8125	1	0.0375	0.275	0.475	0.7	0.9875	0.0125	0.175	0.525	0.6875	0.9625	0.4	0	0.6	0	0.075949	0	0.0125	0.3625	0.8	0.9	1	0	0	0	0	0	0.0375	0.2	0.4375	0.5875	0.7375	0.6	0.43038	0.05	0.275	0.575	0.725	0.9625	0.4
0.354839	0.301075	0.344086	0.217391	0.282609	0.163043	0.043011	0.247312	0.526882	0.709677	0.956989	0.021505	0.27957	0.462366	0.731183	1	0.010753	0.182796	0.473118	0.752688	0.978495	0.462366	0.107527	0.430108	0.065217	0.108696	0	0.010753	0.107527	0.333333	0.55914	1	0.16129	0.172043	0.204301	0.290323	0.376344	0.236559	0.505376	0.677419	0.83871	0.978495	0.505376	0.434783	0.032258	0.268817	0.408602	0.655914	0.978495	0.311828
0.223301	0.427184	0.349515	0.137255	0.117647	0.22549	0.019417	0.281553	0.504854	0.563107	0.92233	0.029126	0.349515	0.631068	0.825243	1	0.009709	0.126214	0.271845	0.650485	0.932039	0.650485	0.23301	0.116505	0.058824	0.039216	0.019608	0.009709	0.349515	0.572816	0.786408	1	0.029126	0.07767	0.135922	0.669903	0.873786	0.145631	0.165049	0.213592	0.446602	0.475728	0.485437	0.313725	0.038835	0.145631	0.359223	0.640777	0.932039	0.466019
0.296	0.370667	0.333333	0.18984	0.221925	0.229947	0.005333	0.237333	0.464	0.685333	0.992	0.018667	0.242667	0.525333	0.8	1	0.002667	0.250667	0.485333	0.704	0.989333	0.488	0.146667	0.365333	0.069519	0.085561	0	0.002667	0.306667	0.501333	0.765333	1	0.178667	0.338667	0.538667	0.674667	0.981333	0.010667	0.117333	0.370667	0.744	0.96	0.578667	0.336898	0.013333	0.296	0.552	0.781333	0.989333	0.349333
0.359788	0.354497	0.285714	0.234043	0.228723	0.180851	0.015873	0.269841	0.534392	0.783069	1	0.010582	0.26455	0.529101	0.751323	0.978836	0.005291	0.185185	0.402116	0.666667	0.994709	0.375661	0.169312	0.455026	0.074468	0.053191	0.010638	0.005291	0.216931	0.465608	0.740741	1	0.015873	0.243386	0.412698	0.708995	0.883598	0.121693	0.280423	0.502646	0.78836	0.962963	0.507937	0.446809	0.015873	0.238095	0.407407	0.703704	0.994709	0.349206
0.310811	0.391892	0.297297	0.244068	0.20339	0.250847	0.013514	0.277027	0.503378	0.787162	0.993243	0.006757	0.189189	0.462838	0.716216	0.989865	0.003378	0.266892	0.5	0.780405	1	0.456081	0.152027	0.391892	0.088136	0.101695	0	0.003378	0.243243	0.641892	0.831081	1	0.023649	0.155405	0.361486	0.547297	0.817568	0.10473	0.273649	0.439189	0.739865	0.918919	0.547297	0.366102	0.027027	0.25	0.476351	0.739865	0.996622	0.435811
0.29703	0.329208	0.373762	0.188586	0.233251	0.200993	0.007426	0.25495	0.502475	0.737624	0.997525	0.012376	0.274752	0.542079	0.799505	1	0.002475	0.222772	0.460396	0.712871	0.967822	0.584158	0.321782	0.094059	0.121588	0.022333	0.002481	0.002475	0.24505	0.470297	0.779703	1	0.160891	0.428218	0.559406	0.720297	0.950495	0.009901	0.034653	0.069307	0.091584	0.972772	0.613861	0.337469	0.009901	0.257426	0.475248	0.725248	0.980198	0.363861
0.350575	0.281609	0.367816	0.202312	0.208092	0.236994	0.017241	0.310345	0.655172	0.810345	1	0.011494	0.224138	0.442529	0.781609	0.994253	0.005747	0.241379	0.402299	0.597701	0.971264	0.41954	0.270115	0.310345	0.086705	0.040462	0.028902	0.005747	0.362069	0.655172	0.83908	1	0.022989	0.465517	0.586207	0.758621	0.931034	0.045977	0.16092	0.241379	0.316092	0.735632	0.54023	0.312139	0.022989	0.247126	0.396552	0.574713	0.971264	0.247126
0.256757	0.445946	0.297297	0.246575	0.136986	0.328767	0.027027	0.135135	0.459459	0.783784	0.945946	0.040541	0.22973	0.445946	0.621622	0.986486	0.013514	0.324324	0.567568	0.689189	1	0.459459	0.081081	0.459459	0.068493	0.041096	0.041096	0.013514	0.108108	0.432432	0.540541	1	0.351351	0.351351	0.391892	0.635135	0.675676	0.135135	0.22973	0.72973	0.837838	0.959459	0.581081	0.383562	0.067568	0.337838	0.540541	0.72973	0.959459	0.472973
0.25974	0.324675	0.415584	0.197368	0.118421	0.276316	0.025974	0.285714	0.415584	0.597403	0.987013	0.051948	0.337662	0.545455	0.753247	0.974026	0.012987	0.155844	0.454545	0.779221	1	0.506494	0.311688	0.181818	0.078947	0.078947	0.026316	0.012987	0.272727	0.428571	0.714286	1	0.090909	0.155844	0.662338	0.87013	0.948052	0.077922	0.38961	0.558442	0.597403	0.649351	0.571429	0.315789	0.051948	0.181818	0.480519	0.766234	0.961039	0.38961
0.307692	0.386588	0.30572	0.227273	0.219368	0.221344	0.00789	0.262327	0.481262	0.763314	0.998028	0.003945	0.252465	0.524655	0.747535	1	0.001972	0.22288	0.4714	0.725838	0.994083	0.512821	0.392505	0.094675	0.114625	0.023715	0	0.001972	0.311637	0.568047	0.838264	1	0.055227	0.307692	0.5286	0.678501	0.982249	0.005917	0.027613	0.071006	0.16568	0.865878	0.506903	0.438735	0.005917	0.240631	0.483235	0.715976	0.994083	0.424063
0.355009	0.351494	0.293497	0.219877	0.226913	0.205805	0.001757	0.272408	0.47891	0.745167	0.996485	0.005272	0.181019	0.464851	0.726714	0.999121	0.000879	0.304042	0.55536	0.77768	1	0.543058	0.1942	0.262742	0.076517	0.085312	0.006157	0.000879	0.235501	0.443761	0.719684	1	0.001757	0.404218	0.54833	0.832162	0.943761	0.022847	0.246046	0.578207	0.731107	0.993849	0.485062	0.369393	0.002636	0.316344	0.599297	0.790861	0.997364	0.36819
0.306122	0.384354	0.309524	0.204778	0.180887	0.279863	0.013605	0.227891	0.496599	0.693878	1	0.006803	0.258503	0.571429	0.778912	0.996599	0.003401	0.221088	0.462585	0.690476	0.969388	0.52381	0.187075	0.289116	0.105802	0.071672	0.003413	0.003401	0.197279	0.418367	0.710884	1	0.027211	0.268707	0.35034	0.62585	0.959184	0.14966	0.47619	0.673469	0.87415	0.94898	0.598639	0.327645	0.017007	0.251701	0.435374	0.636054	0.965986	0.435374
0.314286	0.371429	0.314286	0.221311	0.192623	0.245902	0.008163	0.273469	0.526531	0.763265	1	0.02449	0.220408	0.477551	0.746939	0.995918	0.004082	0.244898	0.481633	0.714286	0.987755	0.395918	0.183673	0.420408	0.07377	0.090164	0	0.004082	0.355102	0.502041	0.771429	1	0.089796	0.216327	0.428571	0.738776	0.865306	0.012245	0.155102	0.477551	0.689796	0.971429	0.579592	0.360656	0.016327	0.22449	0.481633	0.693878	0.991837	0.37551
0.384321	0.41109	0.204589	0.273946	0.176245	0.14751	0.007648	0.254302	0.491396	0.674952	1	0.003824	0.265774	0.476099	0.801147	0.978967	0.001912	0.17782	0.562141	0.724665	0.994264	0.600382	0.01912	0.380497	0.01341	0.070881	0.001916	0.001912	0.25239	0.405354	0.694073	1	0.133843	0.141491	0.826004	0.829828	0.843212	0.036329	0.244742	0.629063	0.749522	0.996176	0.399618	0.371648	0.005736	0.208413	0.541109	0.799235	0.992352	0.443595
0.483871	0.322581	0.193548	0.279221	0.168831	0.123377	0.019355	0.283871	0.503226	0.787097	1	0.012903	0.2	0.529032	0.716129	0.967742	0.006452	0.16129	0.432258	0.651613	0.954839	0.658065	0.096774	0.245161	0.038961	0.077922	0	0.006452	0.251613	0.554839	0.793548	1	0.045161	0.058065	0.387097	0.606452	0.632258	0.096774	0.148387	0.496774	0.696774	0.909677	0.206452	0.298701	0.045161	0.16129	0.4	0.612903	0.954839	0.380645
0.28739	0.381232	0.331378	0.202941	0.170588	0.267647	0.01173	0.146628	0.42522	0.727273	1	0.005865	0.240469	0.489736	0.733138	0.991202	0.002933	0.29912	0.524927	0.753666	0.997067	0.451613	0.143695	0.404692	0.058824	0.076471	0	0.002933	0.190616	0.44868	0.788856	1	0.13783	0.208211	0.434018	0.71261	0.967742	0.014663	0.369501	0.557185	0.730205	0.947214	0.548387	0.376471	0.02346	0.304985	0.510264	0.730205	0.979472	0.392962
0.300733	0.388753	0.310513	0.203431	0.203431	0.257353	0.01467	0.271394	0.503667	0.713936	0.987775	0.00489	0.222494	0.501222	0.767726	0.997555	0.002445	0.237164	0.469438	0.718826	1	0.352078	0.193154	0.454768	0.068627	0.098039	0.004902	0.002445	0.244499	0.555012	0.816626	1	0.08313	0.273839	0.437653	0.574572	0.789731	0.00489	0.232274	0.530562	0.726161	0.97555	0.618582	0.338235	0.00978	0.261614	0.528117	0.740831	0.99022	0.413203
0.322314	0.305785	0.371901	0.166667	0.225	0.2	0.033058	0.280992	0.644628	0.818182	1	0.024793	0.157025	0.413223	0.53719	0.933884	0.008264	0.272727	0.396694	0.669421	0.983471	0.22314	0.049587	0.727273	0.016667	0.066667	0	0.008264	0.123967	0.181818	0.892562	1	0.950413	0.950413	0.966942	0.975207	0.991736	0.024793	0.305785	0.487603	0.669421	0.859504	0.504132	0.366667	0.041322	0.264463	0.421488	0.61157	0.975207	0.322314
0.251397	0.486034	0.26257	0.230337	0.174157	0.224719	0.027933	0.217877	0.536313	0.759777	0.994413	0.011173	0.268156	0.497207	0.73743	1	0.005587	0.173184	0.430168	0.675978	0.927374	0.631285	0.346369	0.022346	0.123596	0.011236	0	0.005587	0.156425	0.446927	0.75419	1	0.173184	0.385475	0.553073	0.726257	0.988827	0.519553	0.519553	0.52514	0.530726	0.536313	0.541899	0.348315	0.022346	0.391061	0.558659	0.75419	0.98324	0.519553
0.277955	0.405751	0.316294	0.25	0.182692	0.262821	0.009585	0.223642	0.476038	0.709265	1	0.00639	0.255591	0.482428	0.763578	0.99361	0.003195	0.246006	0.533546	0.744409	0.996805	0.520767	0.204473	0.27476	0.083333	0.070513	0	0.003195	0.220447	0.482428	0.715655	1	0.028754	0.249201	0.5623	0.731629	0.805112	0.047923	0.354633	0.43131	0.853035	0.99361	0.591054	0.326923	0.01278	0.258786	0.517572	0.71885	0.990415	0.466454
0.266112	0.405405	0.328482	0.225	0.1625	0.275	0.014553	0.193347	0.50104	0.719335	0.997921	0.004158	0.266112	0.486486	0.77131	0.995842	0.002079	0.259875	0.505198	0.746362	1	0.376299	0.172557	0.451143	0.05625	0.077083	0.00625	0.002079	0.316008	0.590437	0.787942	1	0.006237	0.303534	0.47817	0.72973	0.93763	0.027027	0.16632	0.428274	0.64657	0.991684	0.671518	0.3625	0.006237	0.274428	0.503119	0.777547	0.993763	0.417879
0.261538	0.389744	0.348718	0.190722	0.180412	0.247423	0.030769	0.220513	0.497436	0.784615	0.974359	0.010256	0.194872	0.482051	0.733333	1	0.005128	0.328205	0.502564	0.692308	0.989744	0.466667	0.071795	0.461538	0.051546	0.041237	0	0.005128	0.123077	0.287179	0.861538	1	0.112821	0.261538	0.502564	0.517949	0.94359	0.148718	0.369231	0.594872	0.707692	0.835897	0.574359	0.309278	0.020513	0.271795	0.425641	0.630769	0.969231	0.4
0.352632	0.334211	0.313158	0.21372	0.208443	0.23219	0.005263	0.218421	0.523684	0.768421	0.992105	0.007895	0.226316	0.471053	0.671053	1	0.002632	0.289474	0.536842	0.792105	0.997368	0.394737	0.076316	0.528947	0.036939	0.079156	0.005277	0.002632	0.118421	0.497368	0.613158	1	0.013158	0.113158	0.592105	0.884211	0.997368	0.081579	0.302632	0.481579	0.760526	0.955263	0.460526	0.432718	0.010526	0.268421	0.447368	0.747368	0.989474	0.363158
0.313808	0.430962	0.25523	0.260504	0.155462	0.176471	0.008368	0.330544	0.531381	0.723849	1	0.020921	0.225941	0.577406	0.849372	0.991632	0.004184	0.188285	0.380753	0.552301	0.933054	0.376569	0.09205	0.531381	0.033613	0.109244	0.008403	0.004184	0.25523	0.627615	0.891213	1	0.008368	0.025105	0.464435	0.539749	0.732218	0.058577	0.238494	0.414226	0.669456	0.974895	0.527197	0.403361	0.008368	0.188285	0.472803	0.702929	0.970711	0.476987
0.31528	0.365571	0.319149	0.203488	0.199612	0.238372	0.009671	0.288201	0.555126	0.764023	0.998066	0.007737	0.2147	0.444874	0.731141	0.992263	0.001934	0.245648	0.500967	0.748549	1	0.653772	0.346228	0	0.135659	0	0	0.001934	0.224371	0.462282	0.663443	1	0.007737	0.303675	0.564797	0.820116	0.996132	0	0	0	0	0	0.59381	0.329457	0.007737	0.237911	0.481625	0.767892	0.994197	0.39265
0.309645	0.309645	0.380711	0.153061	0.280612	0.193878	0.010152	0.269036	0.527919	0.786802	1	0.025381	0.248731	0.401015	0.64467	0.969543	0.005076	0.228426	0.48731	0.746193	0.994924	0.350254	0.263959	0.385787	0.102041	0.091837	0	0.005076	0.253807	0.375635	0.619289	1	0.015228	0.091371	0.28934	0.741117	0.994924	0.208122	0.532995	0.659898	0.807107	0.959391	0.619289	0.397959	0.020305	0.243655	0.472081	0.730964	0.994924	0.304569
0.261644	0.464384	0.273973	0.245542	0.144033	0.233196	0.006849	0.223288	0.472603	0.808219	0.99726	0.00274	0.269863	0.515068	0.69863	1	0.00137	0.217808	0.483562	0.79589	0.99863	0.619178	0.226027	0.154795	0.109739	0.032922	0.00823	0.00137	0.271233	0.487671	0.69726	1	0.038356	0.352055	0.752055	0.878082	0.987671	0.006849	0.091781	0.19589	0.59589	0.919178	0.578082	0.329218	0.006849	0.257534	0.463014	0.734247	0.99863	0.49589
0.348214	0.316964	0.334821	0.197309	0.286996	0.183857	0.013393	0.227679	0.473214	0.6875	0.991071	0.040179	0.294643	0.491071	0.763393	1	0.004464	0.209821	0.513393	0.772321	0.995536	0.258929	0.004464	0.736607	0.008969	0.080717	0	0.004464	0.133929	0.303571	0.660714	1	0.129464	0.129464	0.129464	0.129464	0.129464	0.035714	0.34375	0.553571	0.75	0.964286	0.482143	0.520179	0.026786	0.236607	0.53125	0.790179	0.995536	0.321429
0.178571	0.47619	0.345238	0.144578	0.072289	0.313253	0.035714	0.27381	0.440476	0.607143	0.964286	0.02381	0.345238	0.583333	0.77381	0.988095	0.011905	0.166667	0.297619	0.654762	1	0.654762	0.095238	0.25	0.048193	0.024096	0	0.011905	0.404762	0.607143	0.77381	1	0.511905	0.52381	0.809524	0.833333	0.857143	0.047619	0.095238	0.154762	0.214286	0.285714	0.464286	0.433735	0.071429	0.190476	0.369048	0.666667	0.928571	0.547619
0.111111	0.458333	0.430556	0.098592	0.070423	0.408451	0.097222	0.152778	0.5	0.611111	0.666667	0.041667	0.25	0.527778	0.722222	0.958333	0.013889	0.208333	0.458333	0.819444	1	0.180556	0	0.819444	0	0.056338	0	0.013889	0.041667	0.083333	0.125	1	0	0	0	0	0	0.138889	0.319444	0.527778	0.777778	0.986111	0.736111	0.253521	0.055556	0.263889	0.458333	0.722222	0.944444	0.458333
0.285106	0.429787	0.285106	0.247159	0.173295	0.257102	0.002837	0.239716	0.473759	0.740426	0.995745	0.004255	0.219858	0.480851	0.741844	1	0.001418	0.304965	0.541844	0.763121	0.987234	0.468085	0.092199	0.439716	0.039773	0.09375	0.002841	0.001418	0.208511	0.391489	0.707801	1	0.106383	0.156028	0.235461	0.371631	0.937589	0.011348	0.446809	0.607092	0.795745	0.980142	0.546099	0.383523	0.005674	0.339007	0.590071	0.782979	0.987234	0.448227
0.325342	0.380137	0.294521	0.233677	0.206186	0.237113	0.006849	0.181507	0.424658	0.746575	0.986301	0.010274	0.273973	0.527397	0.767123	1	0.003425	0.277397	0.5	0.702055	0.993151	0.376712	0.143836	0.479452	0.054983	0.089347	0.006873	0.003425	0.167808	0.349315	0.636986	1	0.013699	0.109589	0.226027	0.606164	0.880137	0.157534	0.421233	0.582192	0.832192	0.993151	0.5	0.439863	0.017123	0.280822	0.482877	0.695205	0.993151	0.383562
0.304511	0.359023	0.336466	0.199623	0.20339	0.224105	0.005639	0.159774	0.486842	0.729323	0.962406	0.003759	0.296992	0.522556	0.798872	1	0.00188	0.24812	0.477444	0.719925	0.996241	0.379699	0.150376	0.469925	0.056497	0.071563	0.003766	0.00188	0.306391	0.573308	0.808271	1	0.013158	0.302632	0.513158	0.68609	0.87594	0.026316	0.167293	0.426692	0.746241	0.994361	0.652256	0.361582	0.015038	0.274436	0.49812	0.757519	0.996241	0.366541
0.2	0.41	0.39	0.222222	0.050505	0.30303	0.23	0.39	0.76	0.88	1	0.02	0.3	0.46	0.73	0.99	0.01	0.14	0.41	0.63	0.84	0.5	0.02	0.48	0.020202	0.040404	0	0.01	0.34	0.75	0.87	1	0.41	0.41	0.41	0.41	0.42	0.02	0.13	0.49	0.61	0.73	0.48	0.20202	0.04	0.31	0.5	0.63	0.88	0.39
0.352705	0.350701	0.296593	0.246988	0.230924	0.210843	0.006012	0.236473	0.466934	0.699399	0.991984	0.01002	0.256513	0.51503	0.783567	0.997996	0.002004	0.248497	0.523046	0.751503	1	0.322645	0.092184	0.58517	0.032129	0.088353	0.008032	0.002004	0.208417	0.527054	0.739479	1	0.172345	0.296593	0.677355	0.721443	0.951904	0.014028	0.256513	0.466934	0.777555	0.991984	0.563126	0.413655	0.01002	0.234469	0.49499	0.725451	0.981964	0.336673
0.307692	0.384615	0.307692	0.193548	0.167742	0.296774	0.025641	0.237179	0.487179	0.820513	0.961538	0.012821	0.307692	0.50641	0.730769	0.99359	0.00641	0.217949	0.455128	0.679487	1	0.679487	0.205128	0.115385	0.103226	0.03871	0	0.00641	0.262821	0.49359	0.814103	1	0.070513	0.128205	0.429487	0.525641	0.891026	0.301282	0.320513	0.621795	0.74359	0.775641	0.519231	0.425806	0.032051	0.25641	0.519231	0.666667	0.987179	0.397436
0.321244	0.331606	0.34715	0.197917	0.213542	0.25	0.010363	0.310881	0.528497	0.772021	1	0.015544	0.196891	0.481865	0.699482	0.927461	0.005181	0.186528	0.466321	0.751295	0.984456	0.42487	0.227979	0.34715	0.119792	0.067708	0.005208	0.005181	0.212435	0.481865	0.740933	1	0.025907	0.305699	0.42487	0.626943	0.896373	0.072539	0.243523	0.590674	0.834197	0.974093	0.601036	0.354167	0.015544	0.222798	0.523316	0.720207	0.963731	0.341969
0.370242	0.3391	0.290657	0.274306	0.211806	0.211806	0.00692	0.242215	0.519031	0.809689	0.99654	0.013841	0.287197	0.536332	0.726644	0.989619	0.00346	0.193772	0.422145	0.692042	1	0.647059	0.276817	0.076125	0.121528	0.017361	0.003472	0.00346	0.273356	0.546713	0.775087	1	0.086505	0.280277	0.522491	0.764706	0.955017	0.010381	0.024221	0.044983	0.411765	0.432526	0.550173	0.326389	0.010381	0.224913	0.456747	0.695502	0.955017	0.401384
0.402628	0.367981	0.229391	0.303828	0.165072	0.156699	0.004779	0.240143	0.523297	0.794504	0.996416	0.002389	0.321386	0.568698	0.818399	1	0.001195	0.154122	0.367981	0.580645	0.970131	0.458781	0.126643	0.414576	0.051435	0.118421	0.003589	0.001195	0.320191	0.617682	0.832736	1	0.035842	0.278375	0.462366	0.624851	0.971326	0.004779	0.162485	0.407407	0.642772	0.995221	0.44086	0.325359	0.009558	0.25448	0.432497	0.608124	0.982079	0.394265
0.311005	0.394737	0.294258	0.2494	0.18705	0.256595	0.011962	0.19378	0.485646	0.703349	0.997608	0.004785	0.294258	0.507177	0.763158	1	0.002392	0.253589	0.490431	0.739234	0.992823	0.370813	0.138756	0.490431	0.055156	0.088729	0.01199	0.002392	0.294258	0.514354	0.80622	1	0.236842	0.282297	0.476077	0.712919	0.91866	0.014354	0.186603	0.495215	0.73445	0.995215	0.61244	0.398082	0.009569	0.334928	0.550239	0.784689	0.995215	0.373206
0.206767	0.360902	0.432331	0.158491	0.139623	0.309434	0.007519	0.214286	0.451128	0.755639	1	0.015038	0.263158	0.533835	0.766917	0.992481	0.003759	0.218045	0.447368	0.703008	0.947368	0.300752	0.240602	0.458647	0.056604	0.056604	0.026415	0.003759	0.233083	0.511278	0.793233	1	0.015038	0.139098	0.432331	0.759398	0.879699	0.041353	0.330827	0.56015	0.706767	0.962406	0.733083	0.203774	0.015038	0.229323	0.447368	0.710526	0.966165	0.304511
0.182432	0.391892	0.425676	0.132203	0.138983	0.352542	0.016892	0.094595	0.496622	0.756757	0.993243	0.006757	0.256757	0.47973	0.716216	1	0.003378	0.280405	0.510135	0.773649	0.97973	0.222973	0.003378	0.773649	0.00339	0.071186	0.00339	0.003378	0.195946	0.378378	0.790541	1	0.219595	0.219595	0.219595	0.219595	0.219595	0.02027	0.304054	0.530405	0.739865	0.989865	0.712838	0.176271	0.02027	0.320946	0.537162	0.75	0.976351	0.381757
0.217021	0.455319	0.32766	0.184659	0.133523	0.264205	0.002837	0.219858	0.496454	0.721986	0.995745	0.004255	0.273759	0.524823	0.821277	0.997163	0.001418	0.22695	0.462411	0.69078	1	0.513475	0.053901	0.432624	0.03267	0.058239	0.00142	0.001418	0.21844	0.446809	0.851064	1	0.028369	0.293617	0.591489	0.839716	0.958865	0.005674	0.341844	0.497872	0.673759	0.990071	0.598582	0.309659	0.004255	0.31773	0.547518	0.744681	0.991489	0.436879
0.276451	0.406143	0.317406	0.232877	0.157534	0.256849	0.017065	0.21843	0.508532	0.802048	0.996587	0.006826	0.276451	0.515358	0.720137	1	0.003413	0.235495	0.419795	0.686007	0.993174	0.303754	0.116041	0.580205	0.047945	0.10274	0	0.003413	0.191126	0.406143	0.522184	1	0.020478	0.105802	0.242321	0.488055	0.593857	0.047782	0.348123	0.645051	0.825939	0.982935	0.624573	0.356164	0.013652	0.25256	0.491468	0.726962	0.993174	0.426621
0.364035	0.359649	0.276316	0.281938	0.185022	0.162996	0.013158	0.276316	0.557018	0.77193	0.995614	0.02193	0.22807	0.394737	0.684211	1	0.004386	0.092105	0.517544	0.732456	0.991228	0.570175	0.25	0.179825	0.096916	0.061674	0	0.004386	0.223684	0.442982	0.701754	1	0.254386	0.350877	0.578947	0.890351	0.986842	0.008772	0.048246	0.447368	0.675439	0.877193	0.447368	0.334802	0.02193	0.337719	0.52193	0.679825	0.991228	0.324561
0.321678	0.405594	0.272727	0.267606	0.169014	0.232394	0.055944	0.251748	0.601399	0.762238	0.972028	0.013986	0.216783	0.412587	0.692308	1	0.006993	0.237762	0.482517	0.699301	0.993007	0.433566	0.475524	0.090909	0.15493	0.028169	0	0.006993	0.244755	0.440559	0.657343	1	0.020979	0.174825	0.454545	0.811189	0.993007	0.671329	0.706294	0.727273	0.748252	0.776224	0.608392	0.338028	0.020979	0.223776	0.454545	0.636364	0.993007	0.384615
0.33957	0.415341	0.245089	0.286517	0.159176	0.210674	0.004677	0.26754	0.501403	0.723106	0.996258	0.001871	0.291862	0.542563	0.789523	1	0.000935	0.169317	0.353601	0.71188	0.999065	0.645463	0.119738	0.234799	0.050562	0.046816	0.011236	0.000935	0.366698	0.575304	0.78391	1	0.147802	0.274088	0.402245	0.727783	0.996258	0.002806	0.110384	0.24696	0.434051	0.926099	0.413471	0.348315	0.002806	0.176801	0.355472	0.6913	0.995323	0.433115
0.41784	0.314554	0.267606	0.20283	0.221698	0.198113	0.023474	0.347418	0.610329	0.830986	0.99061	0.00939	0.225352	0.431925	0.629108	1	0.004695	0.117371	0.408451	0.652582	0.995305	0.502347	0.117371	0.380282	0.061321	0.042453	0.004717	0.004695	0.286385	0.43662	0.633803	1	0.183099	0.211268	0.342723	0.521127	0.99061	0.014085	0.103286	0.779343	0.873239	0.971831	0.347418	0.367925	0.014085	0.122066	0.441315	0.633803	0.976526	0.375587
0.235714	0.485714	0.278571	0.197133	0.11828	0.261649	0.014286	0.239286	0.425	0.696429	0.928571	0.007143	0.378571	0.632143	0.796429	0.996429	0.003571	0.142857	0.342857	0.589286	1	0.539286	0.142857	0.317857	0.050179	0.057348	0.007168	0.003571	0.435714	0.664286	0.8	1	0.210714	0.392857	0.475	0.546429	0.878571	0.010714	0.085714	0.189286	0.325	0.989286	0.525	0.344086	0.017857	0.2	0.410714	0.607143	0.989286	0.496429
0.212254	0.437637	0.350109	0.201754	0.105263	0.263158	0.004376	0.374179	0.601751	0.833698	0.993435	0.010941	0.155361	0.437637	0.715536	0.997812	0.002188	0.275711	0.536105	0.689278	1	0.47046	0.067834	0.461707	0.041667	0.037281	0.006579	0.002188	0.122538	0.496718	0.849015	1	0.030635	0.38512	0.763676	0.921225	0.97593	0.148796	0.266958	0.43326	0.641138	0.973742	0.645514	0.20614	0.028446	0.262582	0.437637	0.680525	0.973742	0.461707
0.156463	0.437642	0.405896	0.134091	0.118182	0.343182	0.006803	0.142857	0.419501	0.721088	1	0.004535	0.276644	0.52381	0.736961	0.997732	0.002268	0.251701	0.485261	0.777778	0.995465	0.201814	0.027211	0.770975	0.011364	0.075	0.006818	0.002268	0.14966	0.435374	0.823129	1	0.00907	0.013605	0.020408	0.206349	0.993197	0.045351	0.287982	0.528345	0.746032	0.977324	0.827664	0.122727	0.00907	0.240363	0.464853	0.732426	0.993197	0.442177
0.325175	0.344988	0.329837	0.23804	0.217036	0.224037	0.003497	0.263403	0.498834	0.742424	0.998834	0.005828	0.25641	0.505828	0.764569	0.990676	0.001166	0.2331	0.48951	0.740093	1	0.398601	0.205128	0.39627	0.073512	0.07818	0.008168	0.001166	0.24359	0.51049	0.745921	1	0.024476	0.221445	0.551282	0.701632	0.948718	0.006993	0.272727	0.405594	0.757576	0.997669	0.594406	0.340723	0.004662	0.221445	0.488345	0.759907	0.996503	0.38345
0.368534	0.297414	0.334052	0.209503	0.24838	0.222462	0.021552	0.247845	0.484914	0.74569	0.997845	0.00431	0.241379	0.534483	0.75431	0.993534	0.002155	0.24569	0.480603	0.737069	1	0.390086	0.185345	0.424569	0.069114	0.090713	0	0.002155	0.258621	0.50431	0.758621	1	0.090517	0.325431	0.456897	0.642241	0.913793	0.019397	0.221983	0.523707	0.788793	0.991379	0.601293	0.38013	0.012931	0.299569	0.55819	0.762931	0.991379	0.318966
0.354839	0.327957	0.317204	0.227027	0.205405	0.210811	0.032258	0.231183	0.55914	0.795699	0.994624	0.048387	0.27957	0.451613	0.763441	1	0.005376	0.182796	0.456989	0.688172	0.973118	0.473118	0.129032	0.397849	0.07027	0.102703	0.005405	0.005376	0.274194	0.521505	0.795699	1	0.010753	0.064516	0.489247	0.725806	0.833333	0.075269	0.236559	0.419355	0.612903	0.973118	0.580645	0.389189	0.010753	0.268817	0.5	0.72043	0.978495	0.360215
0.302326	0.429457	0.268217	0.254658	0.164596	0.226708	0.003101	0.271318	0.493023	0.748837	0.995349	0.006202	0.231008	0.505426	0.75814	0.99845	0.00155	0.254264	0.48062	0.72093	1	0.475969	0.234109	0.289922	0.071429	0.046584	0	0.00155	0.203101	0.497674	0.742636	1	0.04186	0.649612	0.787597	0.87907	0.99845	0.004651	0.213953	0.336434	0.44031	0.6	0.702326	0.332298	0.006202	0.254264	0.505426	0.72093	0.996899	0.418605
0.302326	0.356589	0.341085	0.1875	0.265625	0.242188	0.015504	0.294574	0.542636	0.751938	0.984496	0.054264	0.193798	0.457364	0.75969	1	0.007752	0.255814	0.511628	0.697674	0.976744	0.410853	0.271318	0.317829	0.132812	0.054688	0.007812	0.007752	0.124031	0.294574	0.620155	1	0.023256	0.20155	0.581395	0.844961	0.976744	0.356589	0.426357	0.534884	0.689922	0.899225	0.581395	0.375	0.031008	0.232558	0.527132	0.790698	0.976744	0.403101
0.155172	0.310345	0.534483	0.104348	0.104348	0.286957	0.224138	0.267241	0.37069	0.594828	0.974138	0.034483	0.327586	0.517241	0.793103	1	0.008621	0.146552	0.508621	0.689655	0.991379	0.353448	0	0.646552	0	0.069565	0	0.008621	0.301724	0.387931	0.663793	1	0	0	0	0	0	0.025862	0.172414	0.543103	0.775862	0.939655	0.534483	0.347826	0.025862	0.241379	0.5	0.681034	0.965517	0.318966
0.149351	0.415584	0.435065	0.114007	0.107492	0.387622	0.00974	0.314935	0.477273	0.655844	0.996753	0.006494	0.246753	0.493506	0.762987	0.983766	0.003247	0.227273	0.516234	0.743506	1	0.246753	0.035714	0.717532	0.009772	0.068404	0.003257	0.003247	0.422078	0.483766	0.808442	1	0.49026	0.493506	0.785714	0.795455	0.805195	0.00974	0.185065	0.405844	0.694805	0.99026	0.821429	0.18241	0.016234	0.233766	0.506494	0.74026	0.977273	0.38961
0.312655	0.39206	0.295285	0.246269	0.19403	0.251244	0.01737	0.233251	0.468983	0.781638	1	0.004963	0.258065	0.533499	0.759305	0.997519	0.002481	0.25062	0.456576	0.674938	0.992556	0.461538	0.096774	0.441687	0.039801	0.074627	0	0.002481	0.307692	0.612903	0.794045	1	0.047146	0.282878	0.387097	0.51861	0.863524	0.009926	0.218362	0.416873	0.709677	0.987593	0.590571	0.358209	0.014888	0.265509	0.498759	0.717122	0.992556	0.409429
0.171053	0.197368	0.631579	0.04	0.226667	0.306667	0.263158	0.355263	0.447368	0.618421	0.960526	0.026316	0.092105	0.236842	0.789474	0.973684	0.013158	0.25	0.526316	0.723684	1	0.052632	0.065789	0.881579	0.013333	0.013333	0.013333	0.013158	0.013158	0.026316	0.986842	1	0.039474	0.039474	0.052632	0.065789	0.092105	0.105263	0.302632	0.526316	0.75	0.973684	0.657895	0.293333	0.039474	0.184211	0.460526	0.657895	0.947368	0.197368
0.341772	0.348101	0.310127	0.197452	0.216561	0.210191	0.056962	0.265823	0.582278	0.848101	1	0.018987	0.183544	0.392405	0.601266	0.993671	0.006329	0.240506	0.556962	0.721519	0.987342	0.367089	0.183544	0.449367	0.063694	0.101911	0	0.006329	0.196203	0.392405	0.708861	1	0.21519	0.28481	0.525316	0.670886	0.829114	0.06962	0.170886	0.582278	0.860759	0.981013	0.620253	0.382166	0.050633	0.297468	0.531646	0.689873	0.993671	0.392405
0.319756	0.415479	0.264766	0.254842	0.175331	0.216106	0.003055	0.191446	0.462322	0.718941	0.998982	0.002037	0.316701	0.575356	0.795316	0.995927	0.001018	0.217923	0.417515	0.678208	1	0.642566	0.065173	0.292261	0.040775	0.061162	0.002039	0.001018	0.389002	0.599796	0.788187	1	0.194501	0.302444	0.392057	0.664969	0.868635	0.022403	0.120163	0.236253	0.473523	0.98778	0.439919	0.379205	0.005092	0.224033	0.398167	0.667006	0.989817	0.459267
0.292647	0.333824	0.373529	0.175258	0.220913	0.248895	0.010294	0.2	0.425	0.729412	1	0.004412	0.273529	0.538235	0.766176	0.997059	0.001471	0.258824	0.505882	0.739706	0.998529	0.392647	0.101471	0.505882	0.036819	0.078056	0.0162	0.001471	0.189706	0.392647	0.630882	1	0.030882	0.079412	0.242647	0.642647	0.960294	0.098529	0.358824	0.591176	0.798529	0.958824	0.552941	0.356406	0.004412	0.251471	0.507353	0.745588	0.989706	0.351471
0.388128	0.305936	0.305936	0.238532	0.215596	0.192661	0.050228	0.287671	0.465753	0.716895	1	0.009132	0.173516	0.484018	0.712329	0.995434	0.004566	0.251142	0.561644	0.826484	0.990868	0.159817	0.004566	0.835616	0.004587	0.068807	0.004587	0.004566	0.03653	0.30137	0.557078	1	0.570776	0.570776	0.570776	0.570776	0.570776	0.041096	0.26484	0.497717	0.771689	0.995434	0.383562	0.449541	0.018265	0.246575	0.584475	0.812785	0.972603	0.333333
0.277778	0.383041	0.339181	0.217009	0.164223	0.249267	0.005848	0.204678	0.45614	0.74269	0.994152	0.017544	0.27193	0.473684	0.716374	1	0.002924	0.239766	0.540936	0.789474	0.997076	0.505848	0.494152	0	0.164223	0	0	0.002924	0.277778	0.511696	0.730994	1	0.005848	0.21345	0.476608	0.763158	0.98538	0	0	0	0	0	0.546784	0.328446	0.008772	0.239766	0.479532	0.725146	0.982456	0.403509
0.308765	0.346614	0.344622	0.211577	0.185629	0.259481	0.049801	0.270916	0.549801	0.796813	1	0.005976	0.227092	0.462151	0.715139	0.982072	0.001992	0.237052	0.474104	0.729084	0.994024	0.394422	0.087649	0.517928	0.043912	0.0998	0	0.001992	0.241036	0.577689	0.836653	1	0.085657	0.169323	0.7749	0.868526	0.996016	0.003984	0.268924	0.456175	0.629482	0.926295	0.601594	0.37525	0.005976	0.247012	0.494024	0.727092	0.992032	0.36255
0.336898	0.374332	0.28877	0.221429	0.210714	0.223214	0.005348	0.213904	0.445633	0.71836	0.983957	0.003565	0.262032	0.529412	0.757576	1	0.001783	0.283422	0.550802	0.752228	0.998217	0.475936	0.224599	0.299465	0.069643	0.073214	0.005357	0.001783	0.238859	0.491979	0.736185	1	0.005348	0.324421	0.568627	0.688057	0.877005	0.069519	0.245989	0.468806	0.882353	0.976827	0.531194	0.407143	0.00713	0.278075	0.54902	0.729055	0.98574	0.365419
0.320721	0.372973	0.306306	0.232852	0.189531	0.250903	0.003604	0.257658	0.533333	0.758559	0.967568	0.014414	0.263063	0.479279	0.740541	0.994595	0.001802	0.214414	0.491892	0.747748	1	0.526126	0.144144	0.32973	0.075812	0.050542	0	0.001802	0.313514	0.569369	0.778378	1	0.064865	0.189189	0.376577	0.558559	0.965766	0.005405	0.212613	0.405405	0.745946	0.996396	0.52973	0.379061	0.012613	0.234234	0.459459	0.713514	0.990991	0.389189
0.328244	0.312977	0.358779	0.172414	0.210728	0.256705	0.026718	0.20229	0.427481	0.69084	0.992366	0.01145	0.28626	0.576336	0.78626	0.984733	0.003817	0.232824	0.51145	0.759542	1	0.389313	0.259542	0.351145	0.08046	0.065134	0.011494	0.003817	0.251908	0.465649	0.740458	1	0.019084	0.141221	0.320611	0.770992	0.977099	0.076336	0.354962	0.538168	0.71374	0.908397	0.614504	0.329502	0.034351	0.274809	0.583969	0.778626	0.996183	0.335878
0.367816	0.293103	0.33908	0.213873	0.260116	0.184971	0.011494	0.287356	0.551724	0.741379	0.994253	0.017241	0.149425	0.431034	0.729885	1	0.005747	0.229885	0.488506	0.752874	0.965517	0.356322	0.103448	0.54023	0.057803	0.092486	0	0.005747	0.178161	0.482759	0.701149	1	0.045977	0.063218	0.454023	0.591954	0.867816	0.103448	0.281609	0.517241	0.775862	0.977011	0.534483	0.416185	0.034483	0.189655	0.442529	0.614943	0.965517	0.304598
0.227787	0.426494	0.345719	0.161812	0.122977	0.31068	0.008078	0.177706	0.476575	0.594507	0.993538	0.003231	0.263328	0.529887	0.768982	0.995153	0.001616	0.250404	0.47496	0.788368	1	0.397415	0.03231	0.570275	0.019417	0.064725	0.009709	0.001616	0.229402	0.505654	0.662359	1	0.07916	0.357027	0.600969	0.882068	0.998384	0.071082	0.245557	0.470113	0.799677	0.991922	0.718901	0.210356	0.012924	0.247173	0.481422	0.77706	0.996769	0.442649
0.32971	0.376812	0.293478	0.28	0.185455	0.24	0.007246	0.257246	0.518116	0.728261	0.98913	0.01087	0.246377	0.467391	0.75	1	0.003623	0.221014	0.485507	0.76087	0.996377	0.5	0.144928	0.355072	0.061818	0.069091	0.003636	0.003623	0.242754	0.615942	0.753623	1	0.01087	0.050725	0.181159	0.452899	0.913043	0.115942	0.322464	0.514493	0.771739	0.996377	0.626812	0.378182	0.014493	0.282609	0.485507	0.775362	0.996377	0.398551
0.358108	0.375	0.266892	0.227119	0.189831	0.186441	0.006757	0.324324	0.52027	0.75	1	0.010135	0.192568	0.439189	0.611486	0.97973	0.003378	0.273649	0.597973	0.817568	0.996622	0.685811	0.118243	0.195946	0.067797	0.061017	0.00678	0.003378	0.239865	0.5	0.712838	1	0.216216	0.665541	0.739865	0.820946	0.908784	0.023649	0.111486	0.375	0.462838	0.989865	0.364865	0.359322	0.02027	0.239865	0.516892	0.783784	0.993243	0.486486
0.447013	0.286448	0.266538	0.226864	0.244216	0.172879	0.001285	0.250482	0.496468	0.749518	1	0.001927	0.263327	0.549775	0.768786	0.998715	0.000642	0.220295	0.466281	0.716763	0.998073	0.177906	0.002569	0.819525	0.000643	0.112468	0.000643	0.000642	0.256904	0.500321	0.756583	1	0.987155	0.987155	0.987797	0.988439	0.989082	0.002569	0.247913	0.49711	0.746307	0.995504	0.333333	0.416452	0.003211	0.220295	0.478484	0.732177	0.989724	0.29544
0.398883	0.43743	0.163687	0.316378	0.120738	0.137507	0.003911	0.361453	0.57933	0.790503	0.997765	0.001117	0.248045	0.449721	0.746369	0.999441	0.000559	0.152514	0.323464	0.653631	1	0.837989	0.054749	0.107263	0.030184	0.036892	0.001118	0.000559	0.303911	0.555307	0.775419	1	0.001676	0.040782	0.232961	0.614525	0.999441	0.014525	0.158101	0.256425	0.462011	0.934637	0.201676	0.216881	0.001676	0.118436	0.259777	0.421788	0.997207	0.451397
0.248424	0.411097	0.340479	0.20202	0.136364	0.282828	0.006305	0.247163	0.568726	0.791929	0.998739	0.002522	0.21942	0.474149	0.760404	0.997478	0.001261	0.283733	0.485498	0.688525	1	0.501892	0.064313	0.433796	0.030303	0.060606	0	0.001261	0.177806	0.455233	0.828499	1	0.042875	0.491803	0.746532	0.769231	0.929382	0.016393	0.325347	0.481715	0.655738	0.992434	0.562421	0.353535	0.008827	0.293821	0.479193	0.680958	0.994956	0.431274
0.288684	0.422633	0.288684	0.236111	0.152778	0.238426	0.023095	0.230947	0.484988	0.734411	0.997691	0.004619	0.263279	0.494226	0.732102	1	0.002309	0.235566	0.505774	0.785219	0.995381	0.43418	0.145497	0.420323	0.041667	0.092593	0	0.002309	0.279446	0.551963	0.725173	1	0.288684	0.364896	0.533487	0.817552	0.900693	0.013857	0.159353	0.482679	0.748268	0.976905	0.586605	0.356481	0.009238	0.367206	0.549654	0.748268	0.995381	0.429561
0.307915	0.369691	0.322394	0.213527	0.185507	0.221256	0.001931	0.260618	0.600386	0.810811	1	0.002896	0.238417	0.512548	0.734556	0.999035	0.000965	0.25	0.420849	0.625483	0.997104	0.490347	0.087838	0.421815	0.03285	0.0657	0.003865	0.000965	0.187259	0.55695	0.78668	1	0.048263	0.533784	0.657336	0.737452	0.935328	0.009653	0.292471	0.437259	0.623552	0.996139	0.506757	0.324638	0.002896	0.254826	0.427606	0.655405	0.997104	0.390927
0.317935	0.36413	0.317935	0.234332	0.20436	0.245232	0.024457	0.277174	0.532609	0.766304	1	0.005435	0.26087	0.486413	0.733696	0.975543	0.002717	0.209239	0.464674	0.725543	0.997283	0.355978	0.11413	0.529891	0.046322	0.122616	0.002725	0.002717	0.19837	0.478261	0.8125	1	0.008152	0.078804	0.190217	0.817935	0.986413	0.046196	0.309783	0.55163	0.722826	0.956522	0.595109	0.392371	0.008152	0.184783	0.432065	0.709239	0.983696	0.339674
0.351171	0.374582	0.274247	0.252232	0.19308	0.191964	0.004459	0.237458	0.477146	0.755853	1	0.003344	0.286511	0.567447	0.765886	0.998885	0.001115	0.216276	0.401338	0.687848	0.99777	0.58194	0.059086	0.358974	0.026786	0.0625	0.008929	0.001115	0.486065	0.654404	0.807135	1	0.024526	0.150502	0.491639	0.887402	0.981048	0.003344	0.180602	0.298774	0.413601	0.99777	0.396878	0.399554	0.005574	0.217391	0.379041	0.67447	0.99777	0.379041
0.325217	0.370435	0.304348	0.210801	0.21777	0.207317	0.010435	0.257391	0.537391	0.74087	0.998261	0.005217	0.238261	0.438261	0.754783	0.996522	0.001739	0.248696	0.513043	0.744348	1	0.412174	0.107826	0.48	0.059233	0.097561	0.003484	0.001739	0.250435	0.485217	0.69913	1	0.003478	0.233043	0.478261	0.744348	0.933913	0.029565	0.245217	0.54087	0.773913	0.994783	0.57913	0.390244	0.003478	0.267826	0.481739	0.742609	0.97913	0.384348
0.373494	0.277108	0.349398	0.207317	0.182927	0.231707	0.301205	0.409639	0.554217	0.710843	0.975904	0.036145	0.13253	0.325301	0.698795	0.963855	0.012048	0.156627	0.277108	0.73494	1	0.289157	0	0.710843	0	0.073171	0	0.012048	0.638554	0.746988	0.927711	1	0	0	0	0	0	0.024096	0.180723	0.361446	0.542169	0.879518	0.277108	0.268293	0.048193	0.289157	0.433735	0.807229	0.927711	0.313253
0.378289	0.3125	0.309211	0.257426	0.214521	0.191419	0.016447	0.243421	0.470395	0.726974	1	0.046053	0.266447	0.555921	0.773026	0.983553	0.003289	0.200658	0.430921	0.720395	0.990132	0.338816	0.226974	0.434211	0.075908	0.082508	0.0033	0.003289	0.207237	0.467105	0.710526	1	0.105263	0.190789	0.503289	0.664474	0.993421	0.029605	0.263158	0.578947	0.825658	0.950658	0.532895	0.343234	0.006579	0.236842	0.486842	0.733553	0.986842	0.309211
0.383784	0.302703	0.313514	0.168478	0.26087	0.190217	0.027027	0.237838	0.535135	0.767568	1	0.016216	0.254054	0.459459	0.708108	0.983784	0.005405	0.162162	0.481081	0.762162	0.989189	0.372973	0.259459	0.367568	0.092391	0.059783	0.005435	0.005405	0.232432	0.491892	0.637838	1	0.124324	0.394595	0.648649	0.810811	0.956757	0.021622	0.264865	0.432432	0.745946	0.972973	0.6	0.347826	0.048649	0.254054	0.459459	0.72973	0.989189	0.318919
0.26975	0.43738	0.292871	0.235521	0.15444	0.287645	0.003854	0.271676	0.508671	0.834297	0.99422	0.007707	0.235067	0.50289	0.732177	1	0.001927	0.233141	0.481696	0.703276	0.988439	0.466281	0.146435	0.387283	0.071429	0.079151	0.001931	0.001927	0.196532	0.456647	0.674374	1	0.028902	0.156069	0.333333	0.578035	0.709056	0.00578	0.387283	0.745665	0.884393	0.990366	0.581888	0.332046	0.00578	0.290944	0.483622	0.685934	0.988439	0.43738
0.297872	0.376432	0.325696	0.201639	0.203279	0.283607	0.00491	0.252046	0.522095	0.787234	1	0.003273	0.225859	0.466448	0.705401	0.99018	0.001637	0.266776	0.517185	0.747954	0.998363	0.342062	0.229133	0.428805	0.077049	0.090164	0.001639	0.001637	0.206219	0.433715	0.725041	1	0.027823	0.101473	0.216039	0.322422	0.687398	0.13257	0.540098	0.692308	0.85761	0.99509	0.625205	0.370492	0.00982	0.253682	0.482815	0.708674	0.998363	0.379705
0.353846	0.310769	0.335385	0.212963	0.259259	0.219136	0.018462	0.221538	0.535385	0.76	1	0.009231	0.246154	0.446154	0.726154	0.990769	0.003077	0.267692	0.489231	0.744615	0.993846	0.427692	0.110769	0.461538	0.04321	0.067901	0	0.003077	0.135385	0.335385	0.624615	1	0.030769	0.055385	0.184615	0.501538	0.646154	0.283077	0.483077	0.707692	0.846154	0.993846	0.516923	0.438272	0.015385	0.307692	0.547692	0.772308	0.993846	0.356923
0.268293	0.402439	0.329268	0.202454	0.196319	0.300613	0.018293	0.280488	0.603659	0.756098	1	0.02439	0.176829	0.45122	0.689024	0.993902	0.006098	0.256098	0.506098	0.743902	0.987805	0.378049	0.432927	0.189024	0.122699	0.02454	0	0.006098	0.158537	0.378049	0.603659	1	0.036585	0.329268	0.554878	0.853659	0.987805	0.176829	0.213415	0.713415	0.762195	0.810976	0.615854	0.380368	0.012195	0.243902	0.469512	0.719512	0.993902	0.426829
0.228188	0.371365	0.400447	0.174888	0.14574	0.32287	0.004474	0.165548	0.501119	0.642058	1	0.008949	0.250559	0.480984	0.749441	0.995526	0.002237	0.266219	0.514541	0.774049	0.966443	0.324385	0.013423	0.662192	0.011211	0.069507	0.002242	0.002237	0.10962	0.494407	0.709172	1	0.111857	0.111857	0.337808	0.409396	0.41387	0.008949	0.290828	0.510067	0.762864	0.966443	0.659955	0.197309	0.013423	0.286353	0.514541	0.767338	0.96868	0.391499
0.25034	0.397279	0.352381	0.202997	0.162125	0.264305	0.009524	0.322449	0.526531	0.797279	0.998639	0.005442	0.22585	0.511565	0.767347	1	0.001361	0.228571	0.444898	0.682993	0.968707	0.318367	0.09932	0.582313	0.038147	0.057221	0.008174	0.001361	0.157823	0.635374	0.82585	1	0.004082	0.647619	0.719728	0.863946	0.938776	0.038095	0.27619	0.438095	0.590476	0.967347	0.642177	0.313351	0.002721	0.254422	0.468027	0.710204	0.967347	0.402721
0.269231	0.49359	0.237179	0.225806	0.180645	0.180645	0.00641	0.282051	0.429487	0.608974	0.980769	0.019231	0.217949	0.544872	0.775641	1	0.057692	0.25	0.448718	0.692308	0.967949	0.621795	0.211538	0.166667	0.083871	0.019355	0.006452	0.00641	0.179487	0.49359	0.782051	1	0.076923	0.525641	0.660256	0.75641	0.974359	0.237179	0.269231	0.314103	0.352564	0.762821	0.49359	0.335484	0.057692	0.269231	0.512821	0.692308	0.967949	0.461538
0.245614	0.315789	0.438596	0.196429	0.196429	0.232143	0.035088	0.385965	0.596491	0.789474	0.982456	0.087719	0.315789	0.578947	0.77193	0.929825	0.017544	0.157895	0.280702	0.508772	1	0.473684	0.087719	0.438596	0.053571	0.053571	0.017857	0.017544	0.473684	0.596491	0.877193	1	0.052632	0.052632	0.385965	0.403509	0.438596	0.070175	0.157895	0.263158	0.631579	0.754386	0.561404	0.392857	0.052632	0.245614	0.403509	0.614035	0.964912	0.403509
0.227882	0.372654	0.399464	0.139785	0.155914	0.322581	0.013405	0.147453	0.477212	0.72118	0.997319	0.005362	0.230563	0.49866	0.734584	0.991957	0.002681	0.289544	0.50134	0.756032	1	0.310992	0.018767	0.670241	0.010753	0.069892	0.005376	0.002681	0.091153	0.321716	0.723861	1	0.024129	0.024129	0.072386	0.077748	0.49866	0.142091	0.343164	0.55496	0.761394	0.970509	0.729223	0.16129	0.010724	0.319035	0.525469	0.753351	0.978552	0.372654
0.309211	0.431579	0.259211	0.27668	0.142292	0.212121	0.002632	0.236842	0.492105	0.740789	0.994737	0.009211	0.289474	0.569737	0.840789	1	0.001316	0.173684	0.389474	0.628947	0.989474	0.486842	0.107895	0.405263	0.043478	0.069829	0.006588	0.001316	0.314474	0.606579	0.853947	1	0.047368	0.106579	0.339474	0.568421	0.703947	0.005263	0.234211	0.476316	0.672368	0.939474	0.514474	0.324111	0.007895	0.256579	0.444737	0.638158	0.981579	0.452632
0.338875	0.38491	0.276215	0.245839	0.189501	0.213828	0.002558	0.249361	0.485934	0.696931	0.996164	0.011509	0.258312	0.517903	0.80179	1	0.001279	0.230179	0.484655	0.745524	0.998721	0.558824	0.318414	0.122762	0.107554	0.035851	0.002561	0.001279	0.258312	0.524297	0.805627	1	0.035806	0.200767	0.388747	0.571611	0.933504	0.002558	0.554987	0.777494	0.900256	0.987212	0.505115	0.353393	0.002558	0.237852	0.512788	0.7289	0.987212	0.401535
0.264563	0.445388	0.290049	0.228433	0.155529	0.244228	0.002427	0.259709	0.475728	0.683252	0.990291	0.003641	0.228155	0.540049	0.808252	1	0.001214	0.252427	0.470874	0.723301	0.985437	0.674757	0.165049	0.160194	0.066829	0.035237	0.001215	0.001214	0.313107	0.56068	0.791262	1	0.036408	0.131068	0.248786	0.536408	0.737864	0.003641	0.285194	0.408981	0.747573	0.987864	0.479369	0.345079	0.003641	0.23665	0.407767	0.67233	0.996359	0.470874
0.372573	0.365291	0.262136	0.241798	0.218712	0.193196	0.003641	0.260922	0.520631	0.781553	1	0.007282	0.203883	0.479369	0.740291	0.998786	0.001214	0.276699	0.48665	0.713592	0.997573	0.383495	0.003641	0.612864	0	0.102066	0.00486	0.001214	0.112864	0.417476	0.894417	1	0.214806	0.214806	0.214806	0.217233	0.218447	0.035194	0.330097	0.51335	0.703883	0.991505	0.519417	0.388821	0.006068	0.245146	0.476942	0.694175	0.997573	0.373786
0.311024	0.397638	0.291339	0.209486	0.181818	0.272727	0.015748	0.370079	0.566929	0.787402	1	0.007874	0.153543	0.366142	0.645669	0.972441	0.003937	0.244094	0.519685	0.791339	0.996063	0.429134	0.066929	0.503937	0.039526	0.055336	0.007905	0.003937	0.114173	0.299213	0.622047	1	0.059055	0.125984	0.181102	0.240157	0.976378	0.259843	0.448819	0.69685	0.834646	0.992126	0.527559	0.411067	0.011811	0.251969	0.456693	0.728346	0.980315	0.377953
0.367816	0.348659	0.283525	0.219231	0.25	0.219231	0.015326	0.229885	0.494253	0.754789	0.988506	0.007663	0.222222	0.455939	0.708812	0.996169	0.003831	0.275862	0.54023	0.777778	1	0.482759	0.164751	0.35249	0.084615	0.076923	0.007692	0.003831	0.191571	0.45977	0.67433	1	0.114943	0.348659	0.494253	0.727969	0.789272	0.049808	0.264368	0.509579	0.896552	0.992337	0.590038	0.346154	0.02682	0.344828	0.498084	0.678161	0.984674	0.356322
0.366071	0.241071	0.392857	0.117117	0.297297	0.207207	0.026786	0.178571	0.526786	0.669643	0.982143	0.017857	0.339286	0.517857	0.830357	0.946429	0.008929	0.232143	0.4375	0.714286	1	0.330357	0.294643	0.375	0.081081	0.045045	0.045045	0.008929	0.276786	0.517857	0.883929	1	0.026786	0.089286	0.196429	0.3125	0.9375	0.392857	0.491071	0.616071	0.705357	0.928571	0.553571	0.396396	0.035714	0.303571	0.473214	0.714286	0.973214	0.223214
0.281385	0.502165	0.21645	0.2	0.130435	0.156522	0.017316	0.121212	0.402597	0.692641	0.974026	0.008658	0.307359	0.536797	0.753247	0.991342	0.004329	0.190476	0.489177	0.766234	1	0.636364	0.12987	0.233766	0.047826	0.056522	0.004348	0.004329	0.285714	0.445887	0.692641	1	0.103896	0.12987	0.194805	0.489177	0.969697	0.025974	0.225108	0.757576	0.813853	0.874459	0.419913	0.330435	0.012987	0.225108	0.471861	0.65368	0.974026	0.562771
0.271845	0.436893	0.291262	0.245098	0.156863	0.205882	0.019417	0.330097	0.504854	0.747573	1	0.067961	0.262136	0.466019	0.728155	0.990291	0.009709	0.135922	0.495146	0.718447	0.961165	0.708738	0.07767	0.213592	0.058824	0.058824	0	0.009709	0.31068	0.563107	0.776699	1	0.504854	0.514563	0.718447	0.834951	0.854369	0.048544	0.087379	0.145631	0.359223	0.757282	0.495146	0.411765	0.048544	0.174757	0.504854	0.796117	0.961165	0.417476
0.22963	0.407407	0.362963	0.186567	0.119403	0.276119	0.022222	0.162963	0.274074	0.644444	1	0.037037	0.303704	0.466667	0.718519	0.992593	0.007407	0.251852	0.555556	0.762963	0.977778	0.377778	0.103704	0.518519	0.052239	0.097015	0.007463	0.007407	0.237037	0.392593	0.637037	1	0.274074	0.288889	0.355556	0.651852	0.740741	0.02963	0.148148	0.562963	0.844444	0.977778	0.592593	0.268657	0.02963	0.377778	0.577778	0.82963	0.977778	0.42963
0.324	0.396	0.28	0.220884	0.188755	0.184739	0.04	0.324	0.564	0.752	0.996	0.008	0.224	0.464	0.792	1	0.004	0.184	0.436	0.656	0.956	0.544	0.248	0.208	0.100402	0.036145	0.004016	0.004	0.224	0.552	0.836	1	0.024	0.164	0.428	0.656	0.928	0.324	0.372	0.504	0.7	0.752	0.544	0.345382	0.016	0.204	0.436	0.648	0.976	0.404
0.23192	0.508728	0.259352	0.28	0.11	0.29	0.029925	0.25187	0.501247	0.688279	0.987531	0.004988	0.249377	0.523691	0.780549	0.997506	0.002494	0.226933	0.458853	0.743142	1	0.528678	0.107232	0.36409	0.0475	0.0725	0.0075	0.002494	0.189526	0.381546	0.758105	1	0.017456	0.13217	0.264339	0.810474	0.985037	0.007481	0.433915	0.593516	0.743142	0.9601	0.653367	0.37	0.007481	0.264339	0.486284	0.740648	0.995012	0.568579
0.188976	0.377953	0.433071	0.114625	0.12253	0.343874	0.007874	0.30315	0.515748	0.779528	0.988189	0.027559	0.216535	0.46063	0.692913	0.996063	0.003937	0.271654	0.511811	0.759843	1	0.232283	0.047244	0.720472	0.019763	0.067194	0.003953	0.003937	0.066929	0.46063	0.69685	1	0.031496	0.03937	0.492126	0.503937	0.992126	0.090551	0.279528	0.531496	0.759843	0.96063	0.744094	0.150198	0.027559	0.291339	0.503937	0.740157	0.972441	0.334646
0.351464	0.384937	0.263598	0.283019	0.192872	0.232704	0.006276	0.286611	0.535565	0.769874	1	0.004184	0.225941	0.451883	0.73431	0.997908	0.002092	0.246862	0.491632	0.736402	0.995816	0.374477	0.058577	0.566946	0.050314	0.109015	0.016771	0.002092	0.230126	0.443515	0.619247	1	0.01046	0.140167	0.456067	0.539749	0.625523	0.008368	0.276151	0.594142	0.797071	0.987448	0.579498	0.398323	0.008368	0.230126	0.485356	0.74477	0.995816	0.40795
0.153226	0.516129	0.330645	0.162602	0.130081	0.325203	0.056452	0.298387	0.564516	0.766129	0.951613	0.016129	0.387097	0.548387	0.774194	0.991935	0.008065	0.16129	0.290323	0.612903	1	0.516129	0.225806	0.258065	0.105691	0.02439	0.02439	0.008065	0.491935	0.66129	0.862903	1	0.032258	0.322581	0.443548	0.612903	0.975806	0.056452	0.129032	0.193548	0.258065	0.854839	0.532258	0.422764	0.032258	0.177419	0.362903	0.669355	0.983871	0.491935
0.305164	0.366197	0.328638	0.198113	0.235849	0.254717	0.051643	0.276995	0.460094	0.760563	0.99061	0.00939	0.183099	0.483568	0.685446	0.976526	0.004695	0.295775	0.525822	0.769953	1	0.211268	0.126761	0.661972	0.04717	0.084906	0.009434	0.004695	0.328638	0.474178	0.704225	1	0.150235	0.666667	0.812207	0.868545	0.910798	0.014085	0.206573	0.422535	0.619718	0.985915	0.474178	0.443396	0.028169	0.225352	0.511737	0.741784	0.981221	0.375587
0.356757	0.340541	0.302703	0.23913	0.206522	0.195652	0.010811	0.340541	0.578378	0.794595	0.994595	0.016216	0.275676	0.475676	0.67027	0.978378	0.005405	0.113514	0.318919	0.762162	1	0.464865	0.048649	0.486486	0.027174	0.081522	0.005435	0.005405	0.351351	0.47027	0.681081	1	0.227027	0.232432	0.243243	0.264865	0.659459	0.021622	0.135135	0.572973	0.794595	0.989189	0.6	0.326087	0.021622	0.178378	0.475676	0.697297	0.983784	0.372973
0.330247	0.367284	0.302469	0.226006	0.201238	0.226006	0.006173	0.271605	0.527778	0.762346	0.993827	0.015432	0.231481	0.469136	0.75	0.984568	0.003086	0.209877	0.453704	0.700617	1	0.429012	0.231481	0.339506	0.099071	0.055728	0	0.003086	0.191358	0.503086	0.740741	1	0.012346	0.203704	0.496914	0.675926	0.910494	0.046296	0.277778	0.429012	0.762346	0.993827	0.626543	0.371517	0.012346	0.243827	0.481481	0.725309	0.987654	0.398148
0.356962	0.278481	0.364557	0.21066	0.218274	0.220812	0.010127	0.248101	0.544304	0.759494	1	0.007595	0.273418	0.465823	0.774684	0.992405	0.002532	0.217722	0.470886	0.721519	0.997468	0.281013	0.174684	0.544304	0.06599	0.055838	0	0.002532	0.250633	0.610127	0.860759	1	0.136709	0.265823	0.670886	0.797468	0.972152	0.005063	0.222785	0.440506	0.63038	0.918987	0.612658	0.35533	0.005063	0.207595	0.448101	0.713924	0.974684	0.291139
0.325926	0.338272	0.335802	0.200495	0.25	0.252475	0.004938	0.296296	0.54321	0.780247	0.997531	0.012346	0.192593	0.412346	0.723457	1	0.002469	0.264198	0.51358	0.740741	0.962963	0.365432	0.202469	0.432099	0.074257	0.074257	0.00495	0.002469	0.22963	0.587654	0.782716	1	0.004938	0.320988	0.795062	0.879012	0.990123	0.034568	0.241975	0.404938	0.567901	0.992593	0.577778	0.386139	0.007407	0.22963	0.42963	0.693827	0.992593	0.34321
0.296875	0.390625	0.3125	0.220217	0.21059	0.243081	0.002404	0.271635	0.489183	0.713942	0.998798	0.003606	0.262019	0.514423	0.78726	1	0.001202	0.211538	0.460337	0.731971	0.99399	0.472356	0.051683	0.475962	0.022864	0.109507	0.006017	0.001202	0.262019	0.504808	0.754808	1	0.015625	0.046875	0.097356	0.147837	0.393029	0.009615	0.311298	0.53125	0.764423	0.995192	0.578125	0.394705	0.008413	0.222356	0.508413	0.75	0.99399	0.401442
0.362887	0.374227	0.262887	0.262126	0.21775	0.171311	0.002062	0.263918	0.509278	0.727835	1	0.003093	0.260825	0.54433	0.85567	0.998969	0.001031	0.205155	0.442268	0.665979	0.996907	0.396907	0.016495	0.586598	0.009288	0.067079	0.001032	0.001031	0.27732	0.631959	0.893814	1	0.006186	0.091753	0.095876	0.697938	0.982474	0.019588	0.234021	0.459794	0.670103	0.968041	0.450515	0.437564	0.004124	0.2	0.397938	0.694845	0.996907	0.374227
0.154079	0.36858	0.477341	0.09697	0.139394	0.375758	0.012085	0.265861	0.543807	0.864048	0.993958	0.006042	0.23565	0.504532	0.73716	0.996979	0.003021	0.232628	0.477341	0.706949	1	0.299094	0.090634	0.610272	0.042424	0.084848	0.018182	0.003021	0.226586	0.528701	0.800604	1	0.024169	0.042296	0.398792	0.824773	0.848943	0.063444	0.256798	0.47432	0.70997	0.987915	0.725076	0.212121	0.015106	0.256798	0.462236	0.688822	0.984894	0.359517
0.235996	0.40955	0.354454	0.198529	0.134191	0.294118	0.002755	0.247934	0.499541	0.720845	0.999082	0.007346	0.258953	0.497704	0.735537	0.997245	0.000918	0.238751	0.500459	0.801653	1	0.315886	0.072544	0.61157	0.025735	0.073529	0.001838	0.000918	0.152433	0.459137	0.775023	1	0.092746	0.179063	0.746556	0.852158	0.99449	0.028466	0.270891	0.502296	0.675849	0.955923	0.616162	0.336397	0.001837	0.259871	0.503214	0.782369	0.998163	0.440771
0.395652	0.278261	0.326087	0.183406	0.213974	0.200873	0.008696	0.204348	0.369565	0.556522	1	0.017391	0.2	0.621739	0.821739	0.995652	0.004348	0.347826	0.656522	0.795652	0.991304	0.186957	0.026087	0.786957	0.008734	0.069869	0.008734	0.004348	0.082609	0.130435	0.473913	1	0.026087	0.026087	0.034783	0.03913	0.543478	0.043478	0.334783	0.582609	0.782609	0.991304	0.465217	0.384279	0.017391	0.395652	0.682609	0.817391	0.991304	0.269565
0.284507	0.402817	0.312676	0.231638	0.172316	0.276836	0.011268	0.35493	0.569014	0.811268	1	0.005634	0.185915	0.439437	0.707042	0.994366	0.002817	0.267606	0.447887	0.709859	0.991549	0.594366	0.166197	0.239437	0.067797	0.050847	0	0.002817	0.174648	0.346479	0.690141	1	0.061972	0.642254	0.709859	0.819718	0.926761	0.025352	0.377465	0.467606	0.625352	0.991549	0.602817	0.361582	0.008451	0.287324	0.532394	0.735211	0.991549	0.408451
0.285441	0.381226	0.333333	0.199616	0.199616	0.224568	0.028736	0.295019	0.576628	0.783525	0.984674	0.005747	0.264368	0.536398	0.800766	1	0.001916	0.195402	0.411877	0.618774	0.988506	0.490421	0.130268	0.37931	0.057582	0.065259	0.003839	0.001916	0.258621	0.457854	0.819923	1	0.055556	0.168582	0.239464	0.442529	0.925287	0.01341	0.32567	0.616858	0.720307	0.98659	0.534483	0.360845	0.009579	0.214559	0.385057	0.603448	0.988506	0.388889
0.382143	0.307143	0.310714	0.232975	0.27957	0.168459	0.007143	0.221429	0.475	0.689286	1	0.028571	0.278571	0.5	0.721429	0.996429	0.003571	0.214286	0.510714	0.785714	0.982143	0.375	0.171429	0.453571	0.046595	0.089606	0.017921	0.003571	0.332143	0.539286	0.696429	1	0.067857	0.107143	0.307143	0.403571	0.8	0.014286	0.203571	0.557143	0.771429	0.989286	0.482143	0.46595	0.014286	0.267857	0.578571	0.810714	0.982143	0.296429
0.395294	0.310588	0.294118	0.25	0.259434	0.15566	0.007059	0.183529	0.468235	0.729412	0.997647	0.025882	0.355294	0.557647	0.769412	0.990588	0.002353	0.228235	0.454118	0.734118	1	0.367059	0.192941	0.44	0.063679	0.068396	0.007075	0.002353	0.310588	0.529412	0.767059	1	0.284706	0.541176	0.68	0.823529	0.967059	0.009412	0.131765	0.336471	0.698824	0.985882	0.571765	0.363208	0.009412	0.362353	0.56	0.769412	0.988235	0.32
0.290323	0.387097	0.322581	0.177898	0.218329	0.253369	0.013441	0.217742	0.489247	0.760753	1	0.005376	0.266129	0.491935	0.744624	0.997312	0.002688	0.225806	0.508065	0.725806	0.991935	0.400538	0.112903	0.486559	0.032345	0.080863	0.005391	0.002688	0.169355	0.459677	0.629032	1	0.037634	0.061828	0.354839	0.607527	0.798387	0.091398	0.336022	0.567204	0.83871	0.991935	0.623656	0.334232	0.008065	0.274194	0.491935	0.696237	0.991935	0.400538
0.318841	0.347826	0.333333	0.225455	0.2	0.269091	0.014493	0.300725	0.521739	0.731884	1	0.007246	0.257246	0.532609	0.804348	0.996377	0.003623	0.210145	0.442029	0.663043	0.992754	0.264493	0.192029	0.543478	0.076364	0.061818	0.003636	0.003623	0.192029	0.358696	0.836957	1	0.097826	0.206522	0.268116	0.594203	0.971014	0.007246	0.416667	0.568841	0.76087	0.98913	0.518116	0.421818	0.007246	0.163043	0.387681	0.710145	0.992754	0.358696
0.29078	0.390071	0.319149	0.207143	0.25	0.257143	0.014184	0.177305	0.524823	0.758865	0.964539	0.035461	0.248227	0.432624	0.680851	1	0.007092	0.297872	0.503546	0.787234	0.992908	0.432624	0.297872	0.269504	0.078571	0.035714	0.007143	0.007092	0.219858	0.553191	0.730496	1	0.035461	0.134752	0.531915	0.695035	0.992908	0.29078	0.347518	0.41844	0.751773	0.822695	0.489362	0.485714	0.035461	0.283688	0.404255	0.659574	0.985816	0.404255
0.329193	0.347826	0.322981	0.23444	0.221992	0.236515	0.004141	0.20911	0.484472	0.730849	0.985507	0.006211	0.279503	0.498965	0.782609	1	0.00207	0.244306	0.509317	0.728778	0.991718	0.376812	0.099379	0.52381	0.03112	0.089212	0.002075	0.00207	0.202899	0.426501	0.674948	1	0.037267	0.144928	0.242236	0.498965	0.559006	0.022774	0.376812	0.63147	0.807453	0.99793	0.596273	0.381743	0.008282	0.248447	0.469979	0.712215	0.99793	0.36853
0.331675	0.320066	0.348259	0.182724	0.234219	0.219269	0.008292	0.321725	0.527363	0.772803	1	0.006633	0.175788	0.434494	0.68325	0.993367	0.001658	0.260365	0.502488	0.781095	0.998342	0.391376	0.243781	0.364842	0.101329	0.054817	0.008306	0.001658	0.218905	0.484245	0.759536	1	0.00995	0.210614	0.412935	0.756219	0.998342	0.023217	0.339967	0.507463	0.706468	0.958541	0.626866	0.408638	0.004975	0.243781	0.502488	0.751244	0.995025	0.333333
0.3	0.42	0.28	0.236948	0.200803	0.180723	0.012	0.292	0.532	0.8	1	0.008	0.14	0.42	0.74	0.996	0.004	0.324	0.54	0.724	0.976	0.576	0.332	0.092	0.136546	0.040161	0	0.004	0.18	0.5	0.752	1	0.232	0.38	0.556	0.764	0.976	0.012	0.028	0.328	0.692	0.868	0.544	0.345382	0.02	0.38	0.588	0.776	0.992	0.432
0.401493	0.368657	0.229851	0.289985	0.212257	0.177877	0.019403	0.279104	0.516418	0.723881	0.986567	0.002985	0.255224	0.492537	0.761194	1	0.001493	0.2	0.48806	0.749254	0.998507	0.364179	0.122388	0.513433	0.049327	0.082212	0.004484	0.001493	0.235821	0.447761	0.68806	1	0.108955	0.186567	0.261194	0.668657	0.847761	0.020896	0.334328	0.558209	0.825373	0.997015	0.359701	0.484305	0.004478	0.241791	0.507463	0.78209	0.99403	0.41791
0.182891	0.418879	0.39823	0.189349	0.12426	0.322485	0.0059	0.150442	0.477876	0.663717	0.9941	0.00885	0.274336	0.495575	0.761062	1	0.00295	0.253687	0.530973	0.746313	0.99705	0.289086	0.00295	0.707965	0	0.071006	0.005917	0.00295	0.132743	0.457227	0.60767	1	0.259587	0.259587	0.259587	0.259587	0.259587	0.014749	0.286136	0.569322	0.778761	0.99705	0.699115	0.136095	0.017699	0.274336	0.557522	0.749263	0.99115	0.424779
0.27809	0.44382	0.27809	0.259155	0.143662	0.292958	0.005618	0.258427	0.516854	0.769663	1	0.022472	0.233146	0.480337	0.735955	0.997191	0.002809	0.230337	0.483146	0.730337	0.985955	0.516854	0.039326	0.44382	0.061972	0.107042	0.005634	0.002809	0.235955	0.505618	0.738764	1	0.078652	0.117978	0.314607	0.648876	0.904494	0.011236	0.258427	0.438202	0.747191	0.994382	0.609551	0.309859	0.011236	0.283708	0.547753	0.747191	0.980337	0.432584
0.249249	0.441441	0.309309	0.246988	0.156627	0.313253	0.006006	0.255255	0.510511	0.780781	0.987988	0.009009	0.24024	0.501502	0.720721	0.996997	0.003003	0.228228	0.462462	0.741742	1	0.405405	0.243243	0.351351	0.072289	0.090361	0.006024	0.003003	0.219219	0.48048	0.774775	1	0.141141	0.273273	0.462462	0.735736	0.960961	0.054054	0.186186	0.501502	0.648649	0.990991	0.645646	0.391566	0.012012	0.279279	0.522523	0.732733	0.993994	0.504505
0.310345	0.436782	0.252874	0.348837	0.116279	0.197674	0.057471	0.275862	0.425287	0.701149	0.988506	0.068966	0.241379	0.586207	0.793103	1	0.011494	0.137931	0.321839	0.551724	0.977011	0.551724	0.057471	0.390805	0.046512	0.069767	0	0.011494	0.149425	0.436782	0.816092	1	0.126437	0.126437	0.954023	0.965517	0.988506	0.264368	0.344828	0.494253	0.62069	0.724138	0.45977	0.418605	0.034483	0.195402	0.356322	0.586207	0.965517	0.448276
0.344624	0.344624	0.310751	0.20649	0.20649	0.234513	0.007364	0.297496	0.478645	0.689249	0.998527	0.002946	0.189985	0.438881	0.712813	1	0.001473	0.273932	0.583211	0.795287	0.997054	0.425626	0.064801	0.509573	0.029499	0.097345	0.00885	0.001473	0.151694	0.34757	0.631811	1	0.02651	0.104566	0.207658	0.248895	0.365243	0.017673	0.480118	0.656848	0.83947	0.986745	0.452135	0.39823	0.004418	0.285714	0.600884	0.798233	0.992636	0.388807
0.363203	0.303146	0.333651	0.216603	0.236641	0.187977	0.00286	0.246902	0.506196	0.755958	1	0.003813	0.224023	0.486177	0.760724	0.99142	0.000953	0.279314	0.49857	0.732126	0.99714	0.368923	0.120114	0.510963	0.042939	0.08874	0.008588	0.000953	0.224023	0.445186	0.689228	1	0.015253	0.135367	0.320305	0.479504	0.966635	0.00286	0.332698	0.577693	0.800763	0.99714	0.534795	0.406489	0.003813	0.257388	0.477598	0.738799	0.99714	0.310772
0.371758	0.351585	0.276657	0.242775	0.179191	0.176301	0.011527	0.216138	0.432277	0.697406	0.951009	0.005764	0.221902	0.527378	0.688761	1	0.002882	0.29683	0.596542	0.864553	0.997118	0.357349	0	0.642651	0	0.040462	0	0.002882	0.138329	0.521614	0.610951	1	0	0	0	0	0	0.040346	0.288184	0.492795	0.835735	0.997118	0.32853	0.393064	0.028818	0.285303	0.495677	0.795389	0.956772	0.368876
0.340807	0.381166	0.278027	0.225225	0.202703	0.18018	0.03139	0.197309	0.461883	0.780269	1	0.008969	0.269058	0.502242	0.704036	0.986547	0.004484	0.273543	0.511211	0.726457	0.995516	0.408072	0.197309	0.394619	0.067568	0.058559	0.013514	0.004484	0.098655	0.35426	0.632287	1	0.139013	0.38565	0.542601	0.686099	0.964126	0.192825	0.327354	0.578475	0.798206	0.986547	0.641256	0.306306	0.013453	0.313901	0.515695	0.695067	0.96861	0.426009
0.231818	0.522727	0.245455	0.214612	0.086758	0.278539	0.009091	0.218182	0.6	0.781818	0.940909	0.031818	0.236364	0.477273	0.740909	0.995455	0.004545	0.240909	0.409091	0.709091	1	0.822727	0.090909	0.086364	0.050228	0.031963	0.022831	0.004545	0.204545	0.468182	0.740909	1	0.236364	0.254545	0.518182	0.727273	0.768182	0.304545	0.318182	0.704545	0.909091	0.931818	0.336364	0.347032	0.027273	0.254545	0.409091	0.704545	0.968182	0.5
0.398855	0.307252	0.293893	0.246654	0.246654	0.17782	0.003817	0.251908	0.53626	0.791985	0.998092	0.013359	0.229008	0.456107	0.673664	0.986641	0.001908	0.242366	0.503817	0.755725	1	0.377863	0.175573	0.446565	0.061185	0.057361	0.015296	0.001908	0.227099	0.469466	0.717557	1	0.055344	0.209924	0.375954	0.526718	0.917939	0.009542	0.251908	0.582061	0.816794	0.996183	0.540076	0.416826	0.005725	0.280534	0.480916	0.69084	0.980916	0.328244
0.263158	0.392344	0.344498	0.196643	0.177458	0.268585	0.009569	0.263158	0.547847	0.753589	0.995215	0.004785	0.220096	0.476077	0.739234	0.990431	0.002392	0.248804	0.478469	0.755981	1	0.511962	0.208134	0.279904	0.076739	0.067146	0.019185	0.002392	0.263158	0.516746	0.751196	1	0.004785	0.172249	0.342105	0.665072	0.940191	0.074163	0.258373	0.526316	0.815789	0.897129	0.588517	0.311751	0.007177	0.270335	0.488038	0.732057	0.980861	0.444976
0.228571	0.472727	0.298701	0.21875	0.140625	0.273438	0.007792	0.283117	0.498701	0.763636	0.987013	0.005195	0.249351	0.516883	0.737662	1	0.002597	0.207792	0.467532	0.72987	0.997403	0.431169	0.176623	0.392208	0.070312	0.075521	0.002604	0.002597	0.241558	0.514286	0.758442	1	0.01039	0.205195	0.553247	0.737662	0.997403	0.028571	0.277922	0.47013	0.67013	0.942857	0.636364	0.385417	0.007792	0.246753	0.548052	0.766234	0.997403	0.542857
0.294574	0.320413	0.385013	0.165803	0.248705	0.261658	0.005168	0.260982	0.542636	0.780362	0.976744	0.010336	0.232558	0.478036	0.674419	1	0.002584	0.263566	0.488372	0.74677	0.997416	0.385013	0.268734	0.346253	0.080311	0.080311	0.018135	0.002584	0.209302	0.483204	0.726098	1	0.211886	0.320413	0.542636	0.824289	0.992248	0.020672	0.147287	0.434109	0.710594	0.966408	0.540052	0.435233	0.020672	0.250646	0.4677	0.697674	0.989664	0.335917
0.187713	0.351536	0.460751	0.133562	0.150685	0.35274	0.006826	0.225256	0.515358	0.774744	1	0.020478	0.242321	0.464164	0.723549	0.993174	0.003413	0.238908	0.494881	0.761092	0.986348	0.201365	0.023891	0.774744	0.013699	0.082192	0	0.003413	0.174061	0.464164	0.648464	1	0.1843	0.1843	0.808874	0.8157	0.822526	0.013652	0.262799	0.491468	0.750853	0.986348	0.778157	0.212329	0.040956	0.279863	0.494881	0.750853	0.979522	0.327645
0.260047	0.477541	0.262411	0.220379	0.156398	0.263033	0.007092	0.222222	0.496454	0.70922	1	0.004728	0.264775	0.510638	0.763593	0.995272	0.002364	0.21513	0.48227	0.768322	0.997636	0.382979	0.20331	0.413712	0.104265	0.085308	0.004739	0.002364	0.229314	0.531915	0.742317	1	0.014184	0.243499	0.576832	0.801418	0.983452	0.049645	0.264775	0.413712	0.713948	0.865248	0.704492	0.279621	0.01182	0.262411	0.479905	0.732861	0.98818	0.508274
0.328321	0.340852	0.330827	0.243719	0.266332	0.223618	0.02005	0.265664	0.473684	0.749373	1	0.010025	0.278195	0.518797	0.739348	0.997494	0.002506	0.200501	0.458647	0.73183	0.974937	0.370927	0.12782	0.501253	0.050251	0.080402	0.005025	0.002506	0.260652	0.614035	0.85213	1	0.007519	0.235589	0.634085	0.834586	0.914787	0.010025	0.205514	0.421053	0.611529	0.967419	0.64411	0.336683	0.005013	0.280702	0.488722	0.701754	0.974937	0.373434
0.306407	0.532033	0.16156	0.253835	0.128312	0.138075	0.004178	0.197772	0.420613	0.660167	0.998607	0.005571	0.314763	0.619777	0.806407	1	0.001393	0.155989	0.371866	0.516713	0.980501	0.688022	0.050139	0.261838	0.026499	0.043236	0.004184	0.001393	0.33844	0.64624	0.820334	1	0.331476	0.36351	0.383008	0.402507	0.958217	0.012535	0.103064	0.192201	0.47493	0.98468	0.428969	0.345886	0.002786	0.332869	0.550139	0.715877	0.994429	0.516713
0.242593	0.351852	0.405556	0.166976	0.133581	0.283859	0.018519	0.262963	0.492593	0.744444	0.988889	0.003704	0.242593	0.462963	0.785185	1	0.001852	0.218519	0.544444	0.727778	0.994444	0.27037	0.07037	0.659259	0.022263	0.055659	0.018553	0.001852	0.296296	0.62963	0.855556	1	0.125926	0.225926	0.724074	0.807407	0.994444	0.007407	0.248148	0.461111	0.668519	0.948148	0.561111	0.278293	0.012963	0.248148	0.551852	0.761111	0.981481	0.351852
0.175055	0.380744	0.444201	0.144737	0.114035	0.33114	0.006565	0.2407	0.501094	0.713348	0.995624	0.008753	0.207877	0.472648	0.724289	1	0.002188	0.293217	0.536105	0.785558	0.993435	0.223195	0.019694	0.757112	0.004386	0.092105	0.008772	0.002188	0.16849	0.43326	0.698031	1	0.043764	0.045952	0.050328	0.054705	0.487965	0.021882	0.262582	0.525164	0.768053	0.995624	0.774617	0.162281	0.02407	0.247265	0.479212	0.739606	0.97593	0.358862
0.371098	0.396532	0.23237	0.34413	0.19144	0.19144	0.001156	0.246821	0.484393	0.745087	0.997688	0.00289	0.243931	0.510405	0.750289	0.998266	0.000578	0.255491	0.506936	0.747399	1	0.338728	0.009249	0.652023	0.006362	0.080393	0.000578	0.000578	0.241618	0.505202	0.76474	1	0.007514	0.011561	0.842197	0.979769	0.989595	0.012139	0.256647	0.494798	0.736416	0.998266	0.439306	0.486987	0.00289	0.235838	0.49422	0.750867	0.998844	0.372832
0.136364	0.530303	0.333333	0.138462	0.061538	0.323077	0.030303	0.045455	0.166667	0.651515	1	0.060606	0.333333	0.636364	0.833333	0.969697	0.015152	0.151515	0.348485	0.454545	0.757576	0.378788	0	0.621212	0	0.153846	0	0.015152	0.136364	0.727273	0.863636	1	0	0	0	0	0	0.090909	0.272727	0.424242	0.606061	0.954545	0.530303	0.338462	0.060606	0.227273	0.363636	0.515152	0.848485	0.484848
0.267218	0.347107	0.385675	0.151934	0.234807	0.254144	0.011019	0.261708	0.4573	0.713499	0.99449	0.00551	0.146006	0.421488	0.69146	1	0.002755	0.316804	0.578512	0.779614	0.997245	0.53719	0.258953	0.203857	0.09116	0.058011	0.002762	0.002755	0.14876	0.476584	0.749311	1	0.082645	0.534435	0.705234	0.834711	0.972452	0.140496	0.206612	0.305785	0.410468	0.933884	0.512397	0.40884	0.033058	0.294766	0.548209	0.754821	0.975207	0.366391
0.392435	0.36052	0.247045	0.259172	0.201183	0.164497	0.002364	0.250591	0.509456	0.743499	1	0.004728	0.242317	0.42435	0.6513	0.998818	0.001182	0.258865	0.591017	0.826241	0.997636	0.614657	0.128842	0.256501	0.056805	0.080473	0.004734	0.001182	0.231678	0.423168	0.638298	1	0.01182	0.061466	0.334515	0.583924	0.817967	0.078014	0.548463	0.801418	0.916076	0.996454	0.392435	0.36213	0.004728	0.287234	0.583924	0.822695	0.997636	0.373522
0.353945	0.345416	0.30064	0.230769	0.207265	0.235043	0.006397	0.247335	0.488273	0.759062	1	0.01919	0.234542	0.496802	0.750533	0.989339	0.002132	0.270789	0.509595	0.714286	0.995736	0.4371	0.24307	0.319829	0.113248	0.053419	0.002137	0.002132	0.238806	0.488273	0.727079	1	0.055437	0.304904	0.443497	0.701493	0.953092	0.004264	0.117271	0.518124	0.78678	0.993603	0.601279	0.397436	0.004264	0.264392	0.477612	0.733475	0.993603	0.379531
0.238806	0.41791	0.343284	0.30303	0.106061	0.30303	0.089552	0.179104	0.313433	0.731343	1	0.029851	0.223881	0.552239	0.716418	0.970149	0.014925	0.298507	0.432836	0.791045	0.985075	0.58209	0.074627	0.343284	0.060606	0.060606	0	0.014925	0.179104	0.522388	0.671642	1	0.044776	0.044776	0.059701	0.074627	0.701493	0.253731	0.313433	0.402985	0.820896	0.910448	0.462687	0.272727	0.059701	0.358209	0.492537	0.835821	0.955224	0.402985
0.294243	0.383795	0.321962	0.209402	0.213675	0.262821	0.010661	0.211087	0.522388	0.793177	0.993603	0.004264	0.283582	0.515991	0.739872	1	0.002132	0.247335	0.469083	0.729211	0.997868	0.45629	0.183369	0.360341	0.09188	0.083333	0.00641	0.002132	0.189765	0.486141	0.705757	1	0.008529	0.268657	0.54371	0.855011	0.997868	0.012793	0.30064	0.496802	0.767591	0.974414	0.609808	0.358974	0.008529	0.275053	0.477612	0.742004	0.997868	0.383795
0.275701	0.32243	0.401869	0.150235	0.234742	0.258216	0.009346	0.299065	0.61215	0.859813	0.990654	0.023364	0.228972	0.53271	0.696262	1	0.004673	0.219626	0.406542	0.649533	0.981308	0.481308	0.280374	0.238318	0.098592	0.070423	0.004695	0.004673	0.261682	0.546729	0.766355	1	0.280374	0.429907	0.635514	0.808411	0.985981	0.018692	0.107477	0.228972	0.462617	0.878505	0.518692	0.460094	0.018692	0.219626	0.453271	0.696262	0.981308	0.38785
0.307459	0.31413	0.378411	0.18568	0.230583	0.246966	0.003639	0.247423	0.465737	0.733172	0.998181	0.001213	0.258338	0.522135	0.759854	1	0.000606	0.243784	0.50758	0.745907	0.999394	0.26319	0.030928	0.705882	0.012743	0.104976	0.009102	0.000606	0.234081	0.391146	0.630079	1	0.01698	0.231656	0.311704	0.337174	0.638569	0.001819	0.26319	0.557307	0.781686	0.998787	0.546392	0.399272	0.003032	0.238933	0.510006	0.751971	0.999394	0.342025
0.445783	0.289157	0.26506	0.243902	0.182927	0.146341	0.072289	0.289157	0.566265	0.819277	1	0.024096	0.168675	0.361446	0.614458	0.987952	0.012048	0.26506	0.518072	0.698795	0.855422	0.409639	0.084337	0.506024	0.04878	0.097561	0	0.012048	0.096386	0.289157	0.493976	1	0.216867	0.216867	0.240964	0.26506	0.361446	0.180723	0.506024	0.686747	0.807229	0.939759	0.373494	0.317073	0.120482	0.253012	0.506024	0.73494	0.855422	0.289157
0.194805	0.220779	0.584416	0.078947	0.210526	0.236842	0.051948	0.103896	0.61039	0.805195	0.987013	0.116883	0.532468	0.675325	0.792208	0.922078	0.012987	0.220779	0.363636	0.571429	1	0.25974	0.168831	0.571429	0.039474	0.065789	0.013158	0.012987	0.597403	0.662338	0.896104	1	0.74026	0.766234	0.805195	0.844156	0.974026	0.038961	0.194805	0.337662	0.480519	0.727273	0.584416	0.342105	0.025974	0.376623	0.558442	0.753247	0.974026	0.233766
0.301485	0.403452	0.295062	0.245783	0.181526	0.240964	0.00281	0.232437	0.497391	0.770775	0.998394	0.000803	0.255721	0.499398	0.737455	0.999599	0.000401	0.252509	0.499799	0.744681	1	0.600562	0.358892	0.040546	0.140562	0.012851	0.000803	0.000401	0.247692	0.495383	0.751505	1	0.020875	0.256122	0.484544	0.705741	0.995584	0.009635	0.196708	0.928141	0.938177	0.999197	0.478523	0.335743	0.003212	0.234444	0.475713	0.735849	0.998796	0.457246
0.362676	0.355634	0.28169	0.261484	0.187279	0.212014	0.010563	0.200704	0.461268	0.721831	1	0.007042	0.274648	0.535211	0.799296	0.992958	0.003521	0.246479	0.510563	0.68662	0.978873	0.40493	0.172535	0.422535	0.077739	0.084806	0	0.003521	0.295775	0.644366	0.802817	1	0.102113	0.239437	0.440141	0.661972	0.96831	0.014085	0.21831	0.383803	0.623239	0.93662	0.598592	0.353357	0.017606	0.278169	0.528169	0.704225	0.971831	0.43662
0.303371	0.337079	0.359551	0.20904	0.180791	0.299435	0.011236	0.235955	0.477528	0.702247	1	0.016854	0.247191	0.5	0.741573	0.966292	0.005618	0.230337	0.505618	0.792135	0.994382	0.488764	0.269663	0.241573	0.067797	0.101695	0	0.005618	0.202247	0.47191	0.707865	1	0.269663	0.449438	0.724719	0.859551	0.938202	0.022472	0.151685	0.235955	0.606742	0.988764	0.55618	0.361582	0.02809	0.297753	0.533708	0.758427	0.97191	0.370787
0.345455	0.369697	0.284848	0.25	0.182927	0.213415	0.012121	0.290909	0.581818	0.769697	1	0.024242	0.278788	0.557576	0.751515	0.969697	0.006061	0.175758	0.333333	0.551515	0.993939	0.551515	0.284848	0.163636	0.109756	0.060976	0.012195	0.006061	0.278788	0.672727	0.836364	1	0.169697	0.315152	0.442424	0.545455	0.993939	0.060606	0.090909	0.133333	0.539394	0.733333	0.49697	0.280488	0.018182	0.181818	0.424242	0.569697	0.993939	0.430303
0.266667	0.504762	0.228571	0.269231	0.144231	0.230769	0.028571	0.342857	0.647619	0.771429	1	0.019048	0.247619	0.457143	0.714286	0.990476	0.009524	0.209524	0.419048	0.657143	0.961905	0.609524	0.190476	0.2	0.057692	0.038462	0	0.009524	0.380952	0.533333	0.847619	1	0.171429	0.209524	0.285714	0.333333	0.790476	0.028571	0.066667	0.542857	0.590476	0.647619	0.466667	0.269231	0.038095	0.209524	0.4	0.657143	0.961905	0.561905
0.294737	0.368421	0.336842	0.216931	0.243386	0.238095	0.015789	0.189474	0.494737	0.810526	1	0.010526	0.236842	0.473684	0.7	0.994737	0.005263	0.294737	0.531579	0.794737	0.989474	0.589474	0.394737	0.015789	0.137566	0.031746	0	0.005263	0.2	0.447368	0.694737	1	0.015789	0.321053	0.584211	0.784211	0.989474	0.047368	0.047368	0.047368	0.821053	0.831579	0.589474	0.42328	0.021053	0.268421	0.510526	0.731579	0.984211	0.405263
0.291667	0.435606	0.272727	0.220532	0.155894	0.220532	0.011364	0.329545	0.522727	0.795455	1	0.018939	0.19697	0.424242	0.708333	0.996212	0.003788	0.223485	0.484848	0.742424	0.981061	0.32197	0	0.67803	0	0.098859	0	0.003788	0.155303	0.401515	0.621212	1	0	0	0	0	0	0.015152	0.306818	0.5	0.761364	0.992424	0.636364	0.334601	0.015152	0.265152	0.530303	0.746212	0.984848	0.462121
0.276995	0.460094	0.262911	0.273585	0.113208	0.25	0.018779	0.220657	0.516432	0.784038	0.995305	0.00939	0.295775	0.483568	0.751174	1	0.004695	0.173709	0.431925	0.699531	0.985915	0.43662	0.215962	0.347418	0.070755	0.061321	0.004717	0.004695	0.239437	0.478873	0.755869	1	0.056338	0.347418	0.615023	0.699531	0.840376	0.014085	0.197183	0.450704	0.877934	0.967136	0.568075	0.415094	0.023474	0.295775	0.460094	0.7277	0.985915	0.455399
0.325536	0.413255	0.261209	0.267578	0.148438	0.236328	0.005848	0.239766	0.512671	0.791423	1	0.003899	0.247563	0.500975	0.725146	0.992203	0.001949	0.270955	0.479532	0.711501	0.994152	0.530214	0.290448	0.179337	0.105469	0.042969	0	0.001949	0.226121	0.436647	0.74269	1	0.124756	0.358674	0.534113	0.756335	0.992203	0.005848	0.048733	0.580897	0.729045	0.94347	0.522417	0.359375	0.011696	0.290448	0.493177	0.684211	0.994152	0.477583
0.319728	0.380952	0.29932	0.202273	0.179545	0.229545	0.006803	0.154195	0.367347	0.634921	0.977324	0.004535	0.301587	0.530612	0.752834	0.993197	0.002268	0.310658	0.553288	0.773243	1	0.594104	0.113379	0.292517	0.054545	0.086364	0.004545	0.002268	0.1678	0.444444	0.780045	1	0.034014	0.331066	0.428571	0.469388	0.643991	0.090703	0.408163	0.582766	0.764172	0.984127	0.482993	0.327273	0.00907	0.358277	0.553288	0.721088	0.997732	0.371882
0.353383	0.315789	0.330827	0.184906	0.196226	0.25283	0.018797	0.259398	0.522556	0.804511	1	0.007519	0.263158	0.488722	0.672932	0.996241	0.003759	0.221805	0.466165	0.744361	0.992481	0.503759	0.135338	0.360902	0.05283	0.090566	0	0.003759	0.199248	0.43985	0.669173	1	0.011278	0.071429	0.176692	0.778195	0.902256	0.041353	0.394737	0.609023	0.845865	0.992481	0.62782	0.34717	0.011278	0.285714	0.507519	0.718045	0.992481	0.319549
0.243333	0.496667	0.26	0.22408	0.157191	0.237458	0.013333	0.293333	0.53	0.793333	0.993333	0.006667	0.24	0.52	0.733333	0.996667	0.003333	0.236667	0.45	0.68	1	0.41	0.293333	0.296667	0.107023	0.046823	0.006689	0.003333	0.116667	0.406667	0.766667	1	0.173333	0.283333	0.54	0.78	0.98	0.01	0.36	0.453333	0.686667	0.866667	0.626667	0.334448	0.006667	0.296667	0.49	0.693333	0.983333	0.503333
0.36255	0.286853	0.350598	0.219561	0.267465	0.197605	0.003984	0.24502	0.474104	0.717131	0.994024	0.007968	0.227092	0.48008	0.756972	1	0.001992	0.25498	0.539841	0.776892	0.996016	0.48008	0.306773	0.213147	0.111776	0.047904	0.015968	0.001992	0.213147	0.442231	0.651394	1	0.037849	0.368526	0.589641	0.747012	0.932271	0.013944	0.241036	0.61753	0.88247	0.994024	0.555777	0.403194	0.007968	0.294821	0.585657	0.788845	0.988048	0.316733
0.347048	0.354204	0.298748	0.225806	0.21147	0.224014	0.012522	0.198569	0.466905	0.769231	0.998211	0.003578	0.273703	0.49195	0.694097	1	0.001789	0.300537	0.538462	0.790698	0.992844	0.432916	0.280859	0.286225	0.091398	0.037634	0.005376	0.001789	0.218247	0.416816	0.679785	1	0.227191	0.398927	0.576029	0.67263	0.992844	0.014311	0.123435	0.681574	0.754919	0.88551	0.57424	0.304659	0.017889	0.329159	0.497317	0.68873	0.992844	0.355993
0.335912	0.350276	0.313812	0.243363	0.204646	0.192478	0.003315	0.222099	0.437569	0.765746	1	0.00221	0.266298	0.487293	0.720442	0.99779	0.001105	0.245304	0.537017	0.754696	0.99337	0.474033	0.152486	0.373481	0.064159	0.075221	0.004425	0.001105	0.271823	0.432044	0.744751	1	0.007735	0.164641	0.583425	0.807735	0.970166	0.025414	0.342541	0.523757	0.759116	0.944751	0.577901	0.336283	0.00884	0.254144	0.538122	0.730387	0.99337	0.387845
0.367347	0.289796	0.342857	0.209016	0.217213	0.209016	0.016327	0.310204	0.526531	0.734694	0.97551	0.020408	0.167347	0.42449	0.742857	0.987755	0.004082	0.22449	0.502041	0.746939	1	0.383673	0.191837	0.42449	0.04918	0.098361	0	0.004082	0.208163	0.42449	0.804082	1	0.289796	0.640816	0.726531	0.906122	0.995918	0.008163	0.179592	0.379592	0.522449	0.869388	0.542857	0.418033	0.012245	0.191837	0.481633	0.746939	0.987755	0.277551
0.251852	0.362963	0.385185	0.238806	0.179104	0.343284	0.014815	0.111111	0.377778	0.688889	0.940741	0.059259	0.266667	0.511111	0.748148	0.985185	0.007407	0.281481	0.518519	0.77037	1	0.42963	0.42963	0.140741	0.104478	0.014925	0	0.007407	0.155556	0.488889	0.762963	1	0.088889	0.451852	0.614815	0.8	0.992593	0.22963	0.251852	0.288889	0.325926	0.362963	0.622222	0.223881	0.088889	0.266667	0.459259	0.674074	0.977778	0.392593
0.223368	0.532646	0.243986	0.258621	0.113793	0.231034	0.006873	0.285223	0.501718	0.707904	0.982818	0.020619	0.199313	0.491409	0.745704	0.996564	0.003436	0.257732	0.457045	0.762887	1	0.371134	0.209622	0.419244	0.093103	0.072414	0.003448	0.003436	0.261168	0.474227	0.701031	1	0.134021	0.295533	0.75945	0.869416	0.931271	0.006873	0.237113	0.457045	0.652921	0.996564	0.57732	0.372414	0.017182	0.247423	0.47079	0.728522	0.993127	0.5189
0.196382	0.457364	0.346253	0.186528	0.11399	0.34456	0.015504	0.191214	0.48062	0.832041	0.997416	0.007752	0.222222	0.462532	0.72093	1	0.002584	0.297158	0.524548	0.751938	0.994832	0.338501	0.043928	0.617571	0.023316	0.064767	0.002591	0.002584	0.129199	0.294574	0.664083	1	0.005168	0.01292	0.134367	0.560724	0.726098	0.046512	0.348837	0.5323	0.782946	0.992248	0.677003	0.222798	0.005168	0.322997	0.55814	0.75969	0.994832	0.426357
0.265	0.3925	0.3425	0.220551	0.162907	0.275689	0.01	0.29	0.4225	0.6675	1	0.005	0.2025	0.4575	0.7175	0.99	0.0025	0.27	0.56	0.8225	0.9975	0.4075	0.2325	0.36	0.087719	0.032581	0.002506	0.0025	0.245	0.425	0.5875	1	0.035	0.3	0.4625	0.6125	0.9775	0.0625	0.15	0.7875	0.8825	0.995	0.5875	0.33584	0.0125	0.2275	0.5325	0.7525	0.985	0.38
0.351254	0.410992	0.237754	0.241627	0.167464	0.202153	0.007168	0.232975	0.46595	0.752688	0.998805	0.003584	0.321386	0.551971	0.772999	1	0.001195	0.179211	0.356033	0.682198	0.996416	0.775388	0.101553	0.123059	0.043062	0.038278	0.002392	0.001195	0.340502	0.545998	0.782557	1	0.069295	0.173238	0.289128	0.471924	0.990442	0.031063	0.105137	0.217443	0.681004	0.945042	0.431302	0.375598	0.010753	0.212664	0.470729	0.749104	0.996416	0.437276
0.227139	0.359882	0.412979	0.150888	0.177515	0.304734	0.0059	0.230088	0.566372	0.80531	1	0.011799	0.283186	0.492625	0.705015	0.9941	0.00295	0.238938	0.474926	0.746313	0.99705	0.20059	0.00295	0.79646	0.005917	0.053254	0	0.00295	0.286136	0.510324	0.563422	1	0.530973	0.530973	0.530973	0.530973	0.530973	0.014749	0.241888	0.492625	0.772861	0.9941	0.722714	0.213018	0.011799	0.238938	0.460177	0.728614	0.99705	0.312684
0.440789	0.322368	0.236842	0.264901	0.245033	0.119205	0.013158	0.230263	0.473684	0.763158	1	0.026316	0.236842	0.486842	0.657895	0.993421	0.006579	0.25	0.5	0.703947	0.973684	0.559211	0.151316	0.289474	0.046358	0.072848	0.006623	0.006579	0.203947	0.467105	0.756579	1	0.039474	0.118421	0.230263	0.269737	0.605263	0.223684	0.447368	0.671053	0.894737	0.967105	0.361842	0.357616	0.046053	0.236842	0.447368	0.664474	0.960526	0.302632
0.311881	0.445545	0.242574	0.263682	0.134328	0.228856	0.009901	0.188119	0.460396	0.688119	0.975248	0.014851	0.272277	0.49505	0.777228	1	0.00495	0.227723	0.529703	0.727723	0.99505	0.371287	0.079208	0.549505	0.029851	0.109453	0	0.00495	0.257426	0.549505	0.772277	1	0.569307	0.712871	0.732673	0.950495	0.970297	0.049505	0.20297	0.405941	0.648515	0.886139	0.420792	0.39801	0.064356	0.346535	0.564356	0.737624	0.985149	0.420792
0.337793	0.431438	0.230769	0.276382	0.167504	0.18593	0.005017	0.229097	0.478261	0.757525	1	0.008361	0.262542	0.550167	0.779264	0.996656	0.001672	0.26087	0.468227	0.647157	0.998328	0.638796	0.115385	0.245819	0.048576	0.051926	0.001675	0.001672	0.234114	0.548495	0.814381	1	0.090301	0.215719	0.389632	0.531773	0.998328	0.125418	0.292642	0.510033	0.622074	0.983278	0.352843	0.328308	0.0301	0.26087	0.483278	0.668896	0.998328	0.448161
0.294355	0.372984	0.332661	0.220202	0.20202	0.252525	0.004032	0.308468	0.53629	0.752016	1	0.014113	0.21371	0.461694	0.731855	0.997984	0.002016	0.217742	0.46371	0.747984	0.995968	0.393145	0.084677	0.522177	0.044444	0.092929	0	0.002016	0.247984	0.606855	0.842742	1	0.08871	0.159274	0.766129	0.796371	0.989919	0.006048	0.266129	0.439516	0.620968	0.921371	0.631048	0.331313	0.006048	0.245968	0.485887	0.743952	0.989919	0.356855
0.387821	0.362179	0.25	0.247588	0.176849	0.18328	0.012821	0.24359	0.477564	0.727564	0.980769	0.00641	0.233974	0.512821	0.775641	0.99359	0.003205	0.272436	0.5	0.714744	1	0.224359	0.00641	0.769231	0.006431	0.096463	0	0.003205	0.288462	0.727564	0.910256	1	0.897436	0.897436	0.897436	0.897436	0.900641	0.009615	0.237179	0.458333	0.666667	0.974359	0.461538	0.469453	0.028846	0.25	0.487179	0.673077	0.961538	0.365385
0.261944	0.474465	0.263591	0.224422	0.165017	0.226073	0.016474	0.247117	0.551895	0.76112	0.981878	0.003295	0.255354	0.47117	0.713344	1	0.001647	0.2257	0.538715	0.790774	0.996705	0.517298	0.280066	0.202636	0.09571	0.046205	0.0033	0.001647	0.299835	0.499176	0.705107	1	0.07084	0.329489	0.733114	0.833608	0.995058	0.011532	0.098847	0.273476	0.485997	0.962109	0.53542	0.339934	0.008237	0.237232	0.538715	0.734761	0.996705	0.499176
0.319249	0.314554	0.366197	0.188679	0.221698	0.226415	0.014085	0.230047	0.43662	0.713615	1	0.00939	0.29108	0.478873	0.690141	0.971831	0.004695	0.239437	0.539906	0.807512	0.99061	0.413146	0.230047	0.356808	0.099057	0.061321	0.014151	0.004695	0.211268	0.460094	0.671362	1	0.018779	0.507042	0.657277	0.929577	0.995305	0.093897	0.178404	0.399061	0.737089	0.826291	0.638498	0.349057	0.018779	0.2723	0.558685	0.802817	0.99061	0.28169
0.276596	0.374468	0.348936	0.153846	0.162393	0.282051	0.012766	0.340426	0.510638	0.710638	0.982979	0.034043	0.221277	0.446809	0.795745	0.991489	0.004255	0.204255	0.506383	0.731915	1	0.378723	0.259574	0.361702	0.102564	0.08547	0.008547	0.004255	0.217021	0.421277	0.676596	1	0.008511	0.093617	0.27234	0.795745	0.974468	0.161702	0.408511	0.561702	0.72766	0.970213	0.608511	0.42735	0.017021	0.238298	0.485106	0.748936	0.978723	0.391489
0.32598	0.338235	0.335784	0.211302	0.240786	0.203931	0.017157	0.257353	0.487745	0.730392	0.987745	0.004902	0.203431	0.492647	0.759804	1	0.002451	0.262255	0.512255	0.747549	0.997549	0.392157	0.105392	0.502451	0.027027	0.110565	0.017199	0.002451	0.193627	0.470588	0.720588	1	0.178922	0.553922	0.585784	0.67402	0.919118	0.012255	0.264706	0.443627	0.757353	0.990196	0.497549	0.427518	0.007353	0.291667	0.536765	0.757353	0.992647	0.340686
0.3	0.39	0.31	0.272727	0.191919	0.272727	0.13	0.32	0.61	0.74	0.99	0.02	0.14	0.39	0.65	0.97	0.01	0.25	0.51	0.81	1	0.46	0.12	0.42	0.030303	0.070707	0.010101	0.01	0.36	0.48	0.75	1	0.05	0.07	0.1	0.17	0.2	0.21	0.31	0.6	0.86	0.97	0.38	0.40404	0.07	0.29	0.58	0.88	0.98	0.39
0.318841	0.347826	0.333333	0.161765	0.338235	0.220588	0.057971	0.202899	0.623188	0.782609	0.985507	0.028986	0.304348	0.434783	0.608696	0.898551	0.014493	0.115942	0.347826	0.73913	1	0.913043	0.086957	0	0.058824	0	0	0.014493	0.289855	0.521739	0.753623	1	0.028986	0.028986	0.057971	0.072464	0.826087	0	0	0	0	0	0.304348	0.529412	0.043478	0.173913	0.347826	0.681159	0.956522	0.637681
0.282175	0.36958	0.348245	0.203857	0.215565	0.258953	0.003441	0.251893	0.483138	0.746043	1	0.002753	0.277357	0.523056	0.761872	0.999312	0.000688	0.227805	0.489332	0.732966	0.995182	0.695802	0.189952	0.114246	0.100551	0.035813	0	0.000688	0.243634	0.509979	0.750172	1	0.016518	0.253269	0.47488	0.728837	0.994494	0.05437	0.276669	0.500344	0.740537	0.977977	0.631796	0.413223	0.002065	0.244322	0.486579	0.745354	0.995182	0.461115
0.313433	0.373134	0.313433	0.221557	0.206587	0.239521	0.00597	0.21791	0.558209	0.776119	1	0.026866	0.259701	0.483582	0.731343	0.991045	0.002985	0.256716	0.471642	0.707463	0.997015	0.346269	0.134328	0.519403	0.050898	0.092814	0.008982	0.002985	0.238806	0.397015	0.677612	1	0.223881	0.435821	0.638806	0.701493	0.785075	0.00597	0.176119	0.483582	0.823881	0.991045	0.61791	0.401198	0.01194	0.268657	0.480597	0.686567	0.985075	0.402985
0.336	0.344	0.32	0.264706	0.21123	0.235294	0.008	0.264	0.525333	0.757333	0.989333	0.005333	0.224	0.469333	0.72	1	0.002667	0.250667	0.432	0.762667	0.997333	0.485333	0.213333	0.301333	0.066845	0.072193	0.008021	0.002667	0.176	0.461333	0.738667	1	0.085333	0.253333	0.434667	0.832	0.954667	0.122667	0.376	0.528	0.693333	0.994667	0.506667	0.320856	0.013333	0.261333	0.445333	0.76	0.994667	0.389333
0.227147	0.434903	0.33795	0.202778	0.147222	0.291667	0.00831	0.235457	0.551247	0.781163	0.98338	0.00554	0.265928	0.495845	0.742382	0.99723	0.00277	0.229917	0.470914	0.717452	1	0.34349	0.160665	0.495845	0.066667	0.094444	0	0.00277	0.249307	0.465374	0.706371	1	0.00831	0.144044	0.432133	0.645429	0.825485	0.033241	0.279778	0.542936	0.844875	0.99169	0.617729	0.344444	0.00831	0.240997	0.434903	0.698061	0.98892	0.440443
0.31311	0.337517	0.349372	0.186322	0.217027	0.256804	0.002092	0.213389	0.466527	0.725244	0.999303	0.003487	0.267085	0.509066	0.764296	1	0.000697	0.267782	0.513947	0.743375	0.993026	0.346583	0.056485	0.596932	0.023029	0.099791	0.006281	0.000697	0.246862	0.478382	0.794979	1	0.008368	0.251743	0.306834	0.472803	0.987448	0.012552	0.274756	0.53417	0.735007	0.98954	0.603208	0.375436	0.002789	0.264993	0.48954	0.73431	0.990237	0.343096
0.307329	0.364066	0.328605	0.201422	0.189573	0.253555	0.004728	0.236407	0.491726	0.742317	1	0.009456	0.182033	0.472813	0.718676	0.995272	0.002364	0.340426	0.529551	0.768322	0.992908	0.51773	0.191489	0.29078	0.075829	0.07109	0.009479	0.002364	0.158392	0.432624	0.70922	1	0.018913	0.347518	0.486998	0.777778	0.907801	0.130024	0.27896	0.576832	0.739953	0.992908	0.598109	0.331754	0.023641	0.34279	0.56974	0.763593	0.992908	0.397163
0.312217	0.39819	0.289593	0.236364	0.218182	0.259091	0.00905	0.248869	0.484163	0.728507	0.99095	0.0181	0.271493	0.515837	0.742081	1	0.004525	0.199095	0.475113	0.760181	0.9819	0.502262	0.497738	0	0.218182	0	0	0.004525	0.244344	0.497738	0.755656	1	0.0181	0.235294	0.484163	0.737557	0.986425	0	0	0	0	0	0.552036	0.409091	0.013575	0.266968	0.475113	0.733032	0.986425	0.420814
0.292035	0.415929	0.292035	0.245562	0.180473	0.230769	0.00885	0.230088	0.492625	0.740413	0.99705	0.029499	0.256637	0.507375	0.79351	1	0.00295	0.227139	0.439528	0.705015	0.970501	0.410029	0.156342	0.433628	0.06213	0.10355	0.008876	0.00295	0.174041	0.448378	0.752212	1	0.056047	0.215339	0.377581	0.651917	0.949853	0.017699	0.315634	0.542773	0.755162	0.988201	0.669617	0.284024	0.011799	0.250737	0.507375	0.769912	0.99115	0.427729
0.295337	0.388601	0.316062	0.21875	0.213542	0.28125	0.020725	0.316062	0.554404	0.766839	1	0.010363	0.207254	0.409326	0.715026	0.984456	0.005181	0.259067	0.523316	0.735751	0.989637	0.430052	0.362694	0.207254	0.09375	0.03125	0	0.005181	0.279793	0.450777	0.746114	1	0.259067	0.481865	0.601036	0.860104	0.979275	0.020725	0.067358	0.119171	0.19171	0.704663	0.466321	0.5	0.025907	0.165803	0.481865	0.689119	0.979275	0.450777
0.279793	0.378238	0.341969	0.179221	0.215584	0.254545	0.005181	0.272021	0.541451	0.766839	0.994819	0.012953	0.212435	0.494819	0.722798	1	0.002591	0.279793	0.492228	0.761658	0.997409	0.458549	0.292746	0.248705	0.116883	0.054545	0.007792	0.002591	0.139896	0.455959	0.699482	1	0.07772	0.259067	0.489637	0.715026	0.994819	0.049223	0.326425	0.595855	0.813472	0.966321	0.601036	0.374026	0.010363	0.261658	0.502591	0.696891	0.997409	0.411917
0.453642	0.403974	0.142384	0.405316	0.109635	0.112957	0.062914	0.291391	0.549669	0.771523	1	0.006623	0.245033	0.496689	0.738411	0.993377	0.003311	0.043046	0.331126	0.592715	0.956954	0.07947	0.009934	0.910596	0.003322	0.016611	0.003322	0.003311	0.072848	0.092715	0.374172	1	0.056291	0.056291	0.056291	0.059603	0.062914	0.013245	0.281457	0.533113	0.761589	0.990066	0.304636	0.451827	0.013245	0.152318	0.423841	0.668874	0.956954	0.44702
0.269802	0.415842	0.314356	0.238213	0.166253	0.248139	0.00495	0.237624	0.477723	0.712871	1	0.022277	0.25495	0.490099	0.740099	0.997525	0.002475	0.222772	0.509901	0.767327	0.99505	0.391089	0.247525	0.361386	0.08933	0.054591	0	0.002475	0.284653	0.485149	0.663366	1	0.007426	0.341584	0.60396	0.774752	0.950495	0.039604	0.180693	0.415842	0.792079	0.990099	0.633663	0.342432	0.007426	0.25	0.472772	0.732673	0.990099	0.433168
0.362694	0.321244	0.316062	0.166667	0.21875	0.223958	0.015544	0.341969	0.559585	0.709845	0.989637	0.010363	0.150259	0.46114	0.818653	1	0.005181	0.207254	0.450777	0.658031	0.994819	0.373057	0.139896	0.487047	0.0625	0.09375	0	0.005181	0.243523	0.595855	0.829016	1	0.031088	0.056995	0.450777	0.512953	0.813472	0.093264	0.26943	0.544041	0.689119	0.979275	0.544041	0.385417	0.025907	0.186528	0.430052	0.642487	0.917098	0.336788
0.319366	0.361268	0.319366	0.22449	0.171202	0.260771	0.003398	0.210646	0.431484	0.702152	1	0.002265	0.249151	0.516421	0.762174	0.997735	0.001133	0.285391	0.539071	0.755379	0.99547	0.325028	0.053228	0.621744	0.021542	0.103175	0.001134	0.001133	0.257078	0.502831	0.804077	1	0.141563	0.428086	0.911665	0.935447	0.989807	0.00453	0.238958	0.473386	0.685164	0.98188	0.639864	0.30839	0.007928	0.311438	0.546999	0.778029	0.99547	0.375991
0.375	0.309211	0.315789	0.245033	0.178808	0.251656	0.013158	0.210526	0.447368	0.664474	0.993421	0.019737	0.25	0.539474	0.855263	1	0.006579	0.263158	0.493421	0.809211	0.967105	0.203947	0	0.796053	0	0.092715	0	0.006579	0.190789	0.309211	0.671053	1	0	0	0	0	0	0.019737	0.269737	0.526316	0.756579	0.973684	0.546053	0.370861	0.026316	0.328947	0.546053	0.822368	0.973684	0.302632
0.1609	0.560554	0.278547	0.157712	0.086655	0.244367	0.00346	0.235294	0.5	0.807958	1	0.00519	0.209343	0.460208	0.702422	0.99654	0.00173	0.370242	0.589965	0.762976	0.99308	0.598616	0.043253	0.358131	0.019064	0.064125	0.005199	0.00173	0.16436	0.32699	0.66955	1	0.053633	0.197232	0.570934	0.967128	0.99481	0.039792	0.423875	0.628028	0.762976	0.891003	0.631488	0.259965	0.008651	0.307958	0.527682	0.740484	0.99481	0.576125
0.304897	0.388626	0.306477	0.257911	0.186709	0.232595	0.007899	0.265403	0.538705	0.789889	1	0.00316	0.236967	0.475513	0.721959	0.993681	0.00158	0.244866	0.486572	0.734597	0.988942	0.469194	0.232227	0.298578	0.085443	0.066456	0.006329	0.00158	0.266983	0.510269	0.701422	1	0.037915	0.260664	0.481833	0.660348	0.962085	0.014218	0.194313	0.567141	0.824645	0.99684	0.584518	0.363924	0.011058	0.244866	0.491311	0.740916	0.988942	0.412322
0.340909	0.357955	0.301136	0.257143	0.2	0.257143	0.011364	0.289773	0.482955	0.818182	0.994318	0.017045	0.215909	0.522727	0.767045	0.988636	0.005682	0.198864	0.431818	0.642045	1	0.409091	0.329545	0.261364	0.085714	0.04	0.005714	0.005682	0.3125	0.528409	0.772727	1	0.153409	0.255682	0.653409	0.806818	0.994318	0.028409	0.085227	0.335227	0.397727	0.948864	0.420455	0.411429	0.028409	0.244318	0.482955	0.653409	0.988636	0.380682
0.322785	0.367089	0.310127	0.203822	0.191083	0.210191	0.031646	0.158228	0.56962	0.727848	0.892405	0.012658	0.259494	0.43038	0.613924	1	0.006329	0.335443	0.544304	0.803797	0.987342	0.329114	0.107595	0.563291	0.044586	0.082803	0.019108	0.006329	0.082278	0.259494	0.398734	1	0.132911	0.35443	0.379747	0.632911	0.917722	0.14557	0.443038	0.582278	0.791139	0.981013	0.56962	0.305732	0.025316	0.348101	0.506329	0.78481	0.987342	0.373418
0.269813	0.39626	0.333927	0.212121	0.201426	0.279857	0.001781	0.22707	0.454141	0.707925	0.998219	0.002671	0.26447	0.514693	0.770258	0.99911	0.00089	0.247551	0.513802	0.73642	1	0.455922	0.152271	0.391808	0.069519	0.080214	0.023173	0.00089	0.289403	0.525378	0.777382	1	0.003562	0.309884	0.555654	0.739092	0.996438	0.002671	0.175423	0.439893	0.704363	0.987533	0.654497	0.381462	0.002671	0.276046	0.54764	0.77293	0.997329	0.419412
0.307317	0.40813	0.284553	0.229642	0.17101	0.245928	0.006504	0.320325	0.55935	0.769106	0.996748	0.003252	0.252033	0.515447	0.793496	0.998374	0.001626	0.19187	0.403252	0.674797	1	0.474797	0.082927	0.442276	0.039088	0.071661	0	0.001626	0.313821	0.635772	0.821138	1	0.086179	0.308943	0.377236	0.710569	0.908943	0.004878	0.2	0.492683	0.62439	0.986992	0.489431	0.325733	0.004878	0.237398	0.41626	0.606504	0.986992	0.411382
0.373134	0.338308	0.288557	0.295	0.205	0.18	0.014925	0.20398	0.477612	0.746269	0.985075	0.00995	0.313433	0.567164	0.81592	1	0.004975	0.248756	0.437811	0.651741	0.995025	0.497512	0.029851	0.472637	0.02	0.1	0	0.004975	0.348259	0.59204	0.845771	1	0.865672	0.865672	0.875622	0.880597	0.985075	0.049751	0.169154	0.432836	0.616915	0.840796	0.457711	0.38	0.049751	0.318408	0.562189	0.761194	0.99005	0.353234
0.318885	0.359133	0.321981	0.226708	0.217391	0.208075	0.04644	0.263158	0.547988	0.817337	1	0.006192	0.23839	0.458204	0.671827	0.987616	0.003096	0.213622	0.513932	0.752322	0.993808	0.408669	0.201238	0.390093	0.090062	0.096273	0.003106	0.003096	0.260062	0.470588	0.733746	1	0.012384	0.204334	0.594427	0.817337	0.96904	0.040248	0.23839	0.436533	0.705882	0.993808	0.557276	0.335404	0.009288	0.219814	0.495356	0.687307	0.993808	0.393189
0.203704	0.462963	0.333333	0.158879	0.140187	0.327103	0.074074	0.305556	0.537037	0.62037	0.990741	0.037037	0.277778	0.5	0.787037	0.953704	0.009259	0.157407	0.324074	0.694444	1	0.527778	0.148148	0.324074	0.056075	0.056075	0	0.009259	0.388889	0.583333	0.712963	1	0.759259	0.787037	0.861111	0.953704	0.990741	0.046296	0.111111	0.194444	0.296296	0.555556	0.435185	0.35514	0.027778	0.12963	0.240741	0.675926	0.981481	0.425926
0.281915	0.425532	0.292553	0.262032	0.165775	0.256684	0.021277	0.25	0.398936	0.702128	0.989362	0.015957	0.292553	0.553191	0.744681	1	0.005319	0.212766	0.494681	0.771277	0.978723	0.632979	0.170213	0.196809	0.096257	0.053476	0.010695	0.005319	0.287234	0.510638	0.75	1	0.388298	0.579787	0.675532	0.776596	0.989362	0.047872	0.090426	0.175532	0.446809	0.914894	0.606383	0.31016	0.026596	0.239362	0.547872	0.765957	0.984043	0.515957
0.288809	0.433213	0.277978	0.264493	0.163043	0.246377	0.028881	0.303249	0.523466	0.765343	0.99639	0.00722	0.227437	0.487365	0.740072	1	0.00361	0.220217	0.476534	0.732852	0.99278	0.415162	0.133574	0.451264	0.057971	0.07971	0	0.00361	0.274368	0.523466	0.711191	1	0.032491	0.144404	0.418773	0.642599	0.909747	0.061372	0.227437	0.465704	0.790614	0.971119	0.563177	0.376812	0.021661	0.220217	0.480144	0.65343	0.971119	0.444043
0.175781	0.425781	0.398438	0.160784	0.121569	0.376471	0.011719	0.128906	0.390625	0.746094	0.984375	0.007812	0.222656	0.539062	0.765625	1	0.003906	0.273438	0.492188	0.699219	0.996094	0.359375	0.03125	0.609375	0.039216	0.109804	0	0.003906	0.097656	0.308594	0.65625	1	0.050781	0.054688	0.195312	0.203125	0.6875	0.15625	0.390625	0.59375	0.800781	0.996094	0.789062	0.219608	0.015625	0.285156	0.519531	0.738281	0.992188	0.394531
0.364303	0.315403	0.320293	0.203431	0.279412	0.247549	0.00978	0.229829	0.471883	0.767726	1	0.012225	0.224939	0.491443	0.726161	0.977995	0.002445	0.276284	0.513447	0.738386	0.997555	0.794621	0.134474	0.070905	0.090686	0.012255	0.002451	0.002445	0.278729	0.513447	0.753056	1	0.183374	0.383863	0.594132	0.784841	0.99022	0.08802	0.102689	0.141809	0.158924	0.99511	0.530562	0.544118	0.007335	0.283619	0.520782	0.738386	0.99511	0.334963
0.395604	0.233516	0.370879	0.184573	0.272727	0.203857	0.010989	0.28022	0.464286	0.68956	0.994505	0.008242	0.230769	0.508242	0.774725	1	0.002747	0.197802	0.513736	0.82967	0.997253	0.112637	0.013736	0.873626	0.011019	0.027548	0.00551	0.002747	0.049451	0.771978	0.96978	1	0.027473	0.027473	0.03022	0.057692	0.788462	0.032967	0.269231	0.489011	0.706044	0.964286	0.43956	0.424242	0.013736	0.225275	0.56044	0.851648	0.978022	0.233516
0.335335	0.377829	0.286836	0.23475	0.203789	0.24122	0.000924	0.267898	0.508545	0.774134	1	0.001386	0.249423	0.499307	0.742725	0.998614	0.000462	0.232794	0.489145	0.745958	0.999538	0.69515	0.21709	0.08776	0.079482	0.036044	0.003697	0.000462	0.282679	0.528868	0.751501	1	0.016628	0.273903	0.472979	0.757044	0.987529	0.003233	0.136721	0.202771	0.564434	0.9903	0.443418	0.398336	0.001848	0.196767	0.403695	0.738568	0.997691	0.448961
0.345912	0.407547	0.246541	0.240554	0.195214	0.170025	0.005031	0.23522	0.47673	0.768553	0.998742	0.002516	0.283019	0.583648	0.749686	0.993711	0.001258	0.21761	0.389937	0.706918	1	0.664151	0.10566	0.230189	0.047859	0.060453	0.002519	0.001258	0.298113	0.56478	0.738365	1	0.075472	0.114465	0.237736	0.928302	0.974843	0.05283	0.220126	0.367296	0.647799	0.996226	0.416352	0.360202	0.050314	0.227673	0.391195	0.738365	0.997484	0.420126
0.185185	0.407407	0.407407	0.134328	0.164179	0.30597	0.022222	0.192593	0.348148	0.651852	0.925926	0.059259	0.281481	0.622222	0.822222	1	0.007407	0.177778	0.422222	0.644444	0.97037	0.518519	0.17037	0.311111	0.052239	0.08209	0.037313	0.007407	0.296296	0.681481	0.814815	1	0.02963	0.318519	0.4	0.533333	0.614815	0.059259	0.140741	0.437037	0.511111	0.888889	0.614815	0.358209	0.014815	0.207407	0.481481	0.666667	0.97037	0.392593
[truncated: 436 more rows]
[truncated: 83 more columns]
