# Supplementary material for: Prediction of RNA‐Binding Proteins by Voting Systems
Source: Hindawi journal article supplement (doi:10.1155/2011/506205), 2011-01-01
Supplement: f1 [file 506205.f1.zip › testSet10.csv]

v1	v2	v3	v4	v5	v6	v7	v8	v9	v10	v11	v12	v13	v14	v15	v16	v17	v18	v19	v20	v21	v22	v23	v24	v25	v26	v27	v28	v29	v30	v31	v32	v33	v34	v35	v36	v37	v38	v39	v40	v41	v42	v43	v44	v45	v46	v47	v48	v49	v50
0.391304	0.452899	0.155797	0.345455	0.138182	0.112727	0.014493	0.300725	0.532609	0.771739	1	0.025362	0.228261	0.518116	0.710145	0.996377	0.003623	0.130435	0.333333	0.706522	0.923913	0.717391	0.050725	0.231884	0.021818	0.058182	0	0.003623	0.246377	0.48913	0.666667	1	0.032609	0.039855	0.108696	0.315217	0.32971	0.130435	0.365942	0.728261	0.844203	0.92029	0.23913	0.370909	0.01087	0.221014	0.525362	0.778986	0.985507	0.463768
0.373134	0.30597	0.320896	0.234414	0.254364	0.194514	0.00995	0.263682	0.465174	0.723881	0.992537	0.004975	0.159204	0.495025	0.753731	0.997512	0.002488	0.28607	0.529851	0.771144	1	0.405473	0.228856	0.365672	0.089776	0.064838	0.009975	0.002488	0.363184	0.579602	0.751244	1	0.08209	0.455224	0.71393	0.838308	0.925373	0.007463	0.156716	0.281095	0.435323	0.995025	0.5199	0.418953	0.014925	0.241294	0.524876	0.766169	0.995025	0.363184
0.398329	0.275766	0.325905	0.230126	0.249651	0.171548	0.002786	0.238162	0.498607	0.736769	0.995822	0.005571	0.246518	0.491643	0.745125	0.998607	0.001393	0.264624	0.511142	0.764624	1	0.451253	0.083565	0.465181	0.034868	0.079498	0.001395	0.001393	0.17688	0.423398	0.678273	1	0.006964	0.383008	0.604457	0.859331	0.915042	0.016713	0.303621	0.58078	0.763231	0.995822	0.456825	0.387727	0.005571	0.331476	0.529248	0.75766	0.993036	0.295265
0.452941	0.344118	0.202941	0.300885	0.159292	0.129794	0.008824	0.188235	0.479412	0.732353	0.994118	0.005882	0.255882	0.5	0.8	0.991176	0.002941	0.367647	0.532353	0.714706	1	0.485294	0.041176	0.473529	0.023599	0.070796	0	0.002941	0.191176	0.311765	0.605882	1	0.367647	0.373529	0.45	0.532353	0.847059	0.011765	0.405882	0.661765	0.779412	0.997059	0.285294	0.306785	0.017647	0.373529	0.535294	0.670588	0.997059	0.414706
0.359712	0.359712	0.280576	0.217391	0.173913	0.224638	0.021583	0.338129	0.546763	0.741007	0.971223	0.014388	0.194245	0.410072	0.784173	1	0.007194	0.23741	0.467626	0.697842	0.992806	0.47482	0.129496	0.395683	0.057971	0.072464	0	0.007194	0.208633	0.553957	0.863309	1	0.230216	0.251799	0.345324	0.618705	0.913669	0.057554	0.165468	0.496403	0.748201	0.848921	0.417266	0.362319	0.028777	0.258993	0.467626	0.640288	0.964029	0.338129
0.326316	0.397895	0.275789	0.225738	0.166667	0.202532	0.016842	0.176842	0.376842	0.682105	0.981053	0.004211	0.269474	0.496842	0.728421	1	0.002105	0.357895	0.608421	0.821053	0.987368	0.530526	0.454737	0.014737	0.168776	0.004219	0	0.002105	0.16	0.44	0.726316	1	0.101053	0.355789	0.564211	0.776842	0.995789	0.006316	0.006316	0.010526	0.014737	0.018947	0.557895	0.371308	0.010526	0.324211	0.541053	0.741053	0.997895	0.425263
0.584416	0.255411	0.160173	0.247826	0.165217	0.073913	0.008658	0.290043	0.52381	0.722944	1	0.017316	0.220779	0.688312	0.844156	0.987013	0.004329	0.181818	0.294372	0.372294	0.978355	0.480519	0.004329	0.515152	0.008696	0.078261	0	0.004329	0.116883	0.359307	0.865801	1	0.229437	0.229437	0.229437	0.229437	0.229437	0.17316	0.385281	0.519481	0.658009	0.878788	0.147186	0.156522	0.034632	0.181818	0.268398	0.333333	0.532468	0.272727
0.322531	0.449074	0.228395	0.285935	0.145286	0.196291	0.009259	0.228395	0.54321	0.811728	1	0.003086	0.311728	0.515432	0.780864	0.993827	0.001543	0.154321	0.429012	0.595679	0.984568	0.682099	0.057099	0.260802	0.02473	0.040185	0.009274	0.001543	0.307099	0.510802	0.819444	1	0.054012	0.08179	0.385802	0.470679	0.966049	0.021605	0.228395	0.530864	0.621914	0.720679	0.507716	0.31221	0.010802	0.216049	0.476852	0.635802	0.967593	0.453704
0.366038	0.29434	0.339623	0.212121	0.280303	0.185606	0.007547	0.286792	0.554717	0.830189	0.996226	0.05283	0.207547	0.479245	0.675472	1	0.003774	0.241509	0.449057	0.686792	0.962264	0.498113	0.301887	0.2	0.109848	0.056818	0.003788	0.003774	0.241509	0.479245	0.728302	1	0.011321	0.154717	0.283019	0.501887	0.909434	0.354717	0.649057	0.769811	0.826415	0.958491	0.516981	0.340909	0.015094	0.233962	0.456604	0.675472	0.962264	0.324528
0.318072	0.433735	0.248193	0.2657	0.169082	0.214976	0.004819	0.214458	0.481928	0.725301	0.990361	0.007229	0.260241	0.515663	0.785542	1	0.00241	0.26988	0.520482	0.718072	0.992771	0.583133	0.151807	0.26506	0.067633	0.082126	0	0.00241	0.286747	0.549398	0.8	1	0.115663	0.298795	0.46988	0.648193	0.763855	0.007229	0.091566	0.486747	0.718072	0.987952	0.46506	0.381643	0.007229	0.296386	0.583133	0.792771	0.995181	0.428916
0.376147	0.278287	0.345566	0.180982	0.251534	0.187117	0.006116	0.229358	0.489297	0.761468	1	0.021407	0.308869	0.513761	0.715596	0.996942	0.003058	0.232416	0.470948	0.767584	0.993884	0.486239	0.262997	0.250765	0.101227	0.064417	0.009202	0.003058	0.229358	0.504587	0.75841	1	0.009174	0.269113	0.519878	0.703364	0.889908	0.024465	0.100917	0.470948	0.911315	0.993884	0.529052	0.374233	0.009174	0.299694	0.510703	0.733945	0.990826	0.266055
0.376605	0.356633	0.266762	0.27	0.215714	0.174286	0.005706	0.268188	0.520685	0.761769	0.99572	0.002853	0.201141	0.445078	0.740371	1	0.001427	0.339515	0.536377	0.743224	0.998573	0.620542	0.135521	0.243937	0.065714	0.057143	0.005714	0.001427	0.225392	0.472183	0.733238	1	0.039943	0.373752	0.579173	0.825963	0.951498	0.054208	0.360913	0.529244	0.774608	0.998573	0.422254	0.402857	0.007133	0.266762	0.479315	0.699001	0.994294	0.39515
0.376494	0.340637	0.282869	0.225549	0.213573	0.217565	0.003984	0.227092	0.51992	0.75498	0.994024	0.011952	0.260956	0.505976	0.729084	0.988048	0.001992	0.23506	0.464143	0.739044	1	0.511952	0.205179	0.282869	0.083832	0.051896	0	0.001992	0.241036	0.50996	0.798805	1	0.02988	0.173307	0.38247	0.59761	0.996016	0.053785	0.304781	0.569721	0.772908	0.98008	0.496016	0.335329	0.027888	0.268924	0.543825	0.800797	0.978088	0.344622
0.317333	0.354667	0.328	0.187166	0.203209	0.286096	0.005333	0.24	0.482667	0.784	0.997333	0.021333	0.232	0.464	0.712	1	0.002667	0.248	0.52	0.744	0.994667	0.333333	0.090667	0.576	0.037433	0.106952	0.005348	0.002667	0.197333	0.464	0.752	1	0.056	0.117333	0.208	0.266667	0.341333	0.016	0.376	0.562667	0.776	0.992	0.541333	0.44385	0.010667	0.221333	0.424	0.672	0.994667	0.362667
0.48125	0.275	0.24375	0.27044	0.238994	0.119497	0.01875	0.2375	0.51875	0.75625	1	0.0125	0.29375	0.54375	0.8	0.9875	0.00625	0.1625	0.4375	0.5625	0.95625	0.31875	0.175	0.50625	0.050314	0.075472	0.012579	0.00625	0.24375	0.4125	0.64375	1	0.025	0.0625	0.29375	0.375	0.575	0.1	0.4375	0.675	0.8	0.95625	0.4125	0.415094	0.025	0.1875	0.3875	0.55625	0.975	0.2375
0.409253	0.323843	0.266904	0.253571	0.257143	0.139286	0.010676	0.241993	0.512456	0.740214	1	0.007117	0.217082	0.441281	0.765125	0.992883	0.003559	0.284698	0.494662	0.72242	0.975089	0.537367	0.117438	0.345196	0.039286	0.053571	0.010714	0.003559	0.330961	0.466192	0.754448	1	0.02847	0.078292	0.615658	0.669039	0.797153	0.081851	0.181495	0.320285	0.743772	0.950178	0.44484	0.428571	0.017794	0.288256	0.508897	0.743772	0.975089	0.359431
0.408163	0.29932	0.292517	0.232877	0.260274	0.19863	0.013605	0.258503	0.442177	0.748299	0.993197	0.088435	0.319728	0.564626	0.734694	1	0.006803	0.142857	0.469388	0.741497	0.979592	0.353741	0.312925	0.333333	0.130137	0.047945	0.006849	0.006803	0.142857	0.510204	0.748299	1	0.013605	0.244898	0.619048	0.891156	0.993197	0.170068	0.326531	0.408163	0.489796	0.829932	0.387755	0.479452	0.020408	0.204082	0.52381	0.727891	0.979592	0.306122
0.388095	0.27381	0.338095	0.202864	0.264916	0.181384	0.007143	0.264286	0.535714	0.778571	0.997619	0.009524	0.2	0.45	0.678571	1	0.002381	0.254762	0.519048	0.769048	0.995238	0.338095	0.145238	0.516667	0.076372	0.100239	0.004773	0.002381	0.214286	0.545238	0.816667	1	0.085714	0.278571	0.521429	0.92381	0.997619	0.004762	0.252381	0.430952	0.697619	0.897619	0.585714	0.396181	0.011905	0.25	0.459524	0.680952	0.995238	0.278571
0.343949	0.343949	0.312102	0.307692	0.198718	0.230769	0.012739	0.235669	0.477707	0.738854	1	0.076433	0.242038	0.452229	0.719745	0.993631	0.006369	0.184713	0.535032	0.726115	0.961783	0.630573	0.165605	0.203822	0.057692	0.044872	0.019231	0.006369	0.191083	0.350318	0.617834	1	0.019108	0.490446	0.764331	0.821656	0.974522	0.044586	0.541401	0.66242	0.88535	0.936306	0.414013	0.410256	0.019108	0.261146	0.414013	0.707006	0.968153	0.369427
0.384123	0.357234	0.258643	0.258974	0.174359	0.180769	0.005122	0.245839	0.449424	0.745198	0.996159	0.003841	0.213828	0.448143	0.714469	1	0.00128	0.329065	0.615877	0.774648	0.997439	0.590269	0.117798	0.291933	0.042308	0.067949	0.008974	0.00128	0.215109	0.364917	0.587708	1	0.037132	0.582586	0.722151	0.854033	0.959027	0.028169	0.494238	0.65557	0.807939	0.996159	0.449424	0.364103	0.006402	0.330346	0.591549	0.796415	0.997439	0.409731
0.332584	0.417978	0.249438	0.283784	0.166667	0.225225	0.006742	0.193258	0.424719	0.741573	0.993258	0.013483	0.296629	0.505618	0.72809	0.997753	0.002247	0.276404	0.541573	0.759551	1	0.606742	0.161798	0.231461	0.132883	0.051802	0.002252	0.002247	0.195506	0.402247	0.669663	1	0.006742	0.18427	0.435955	0.683146	0.995506	0.164045	0.573034	0.703371	0.835955	0.98427	0.310112	0.5	0.008989	0.321348	0.537079	0.755056	0.995506	0.447191
0.39011	0.274725	0.335165	0.206612	0.267218	0.217631	0.005495	0.282967	0.519231	0.774725	0.997253	0.019231	0.241758	0.497253	0.695055	0.991758	0.002747	0.21978	0.478022	0.728022	1	0.543956	0.178571	0.277473	0.063361	0.052342	0.008264	0.002747	0.277473	0.480769	0.741758	1	0.076923	0.14011	0.667582	0.799451	0.994505	0.038462	0.228022	0.392857	0.722527	0.912088	0.453297	0.380165	0.016484	0.239011	0.510989	0.730769	0.986264	0.326923
0.314286	0.360714	0.325	0.193548	0.172043	0.225806	0.010714	0.232143	0.478571	0.810714	0.989286	0.021429	0.239286	0.464286	0.707143	1	0.003571	0.264286	0.517857	0.757143	0.996429	0.378571	0.175	0.446429	0.050179	0.09319	0	0.003571	0.2	0.442857	0.689286	1	0.175	0.342857	0.428571	0.632143	0.725	0.014286	0.228571	0.525	0.835714	0.992857	0.539286	0.394265	0.032143	0.257143	0.475	0.675	0.992857	0.396429
0.323232	0.373737	0.30303	0.233503	0.182741	0.243655	0.010101	0.227273	0.515152	0.80303	0.969697	0.10101	0.292929	0.520202	0.732323	0.994949	0.005051	0.151515	0.414141	0.671717	1	0.575758	0.161616	0.262626	0.055838	0.06599	0.015228	0.005051	0.313131	0.580808	0.828283	1	0.025253	0.060606	0.277778	0.343434	0.459596	0.080808	0.146465	0.570707	0.737374	0.893939	0.565657	0.324873	0.025253	0.20202	0.40404	0.616162	0.984848	0.348485
0.38961	0.272727	0.337662	0.196078	0.261438	0.183007	0.038961	0.246753	0.577922	0.837662	0.993506	0.012987	0.214286	0.38961	0.597403	0.941558	0.006494	0.227273	0.467532	0.707792	1	0.474026	0.24026	0.285714	0.091503	0.052288	0	0.006494	0.24026	0.493506	0.831169	1	0.025974	0.318182	0.428571	0.707792	0.88961	0.064935	0.12987	0.577922	0.649351	0.824675	0.467532	0.392157	0.025974	0.331169	0.474026	0.720779	0.948052	0.266234
0.456522	0.326087	0.217391	0.296703	0.263736	0.142857	0.021739	0.25	0.456522	0.717391	1	0.043478	0.217391	0.543478	0.706522	0.934783	0.01087	0.152174	0.391304	0.771739	0.978261	0.532609	0.326087	0.141304	0.175824	0.043956	0	0.01087	0.326087	0.597826	0.793478	1	0.021739	0.097826	0.228261	0.75	0.98913	0.380435	0.402174	0.434783	0.467391	0.576087	0.206522	0.373626	0.108696	0.184783	0.456522	0.75	0.956522	0.347826
0.336735	0.362245	0.30102	0.235294	0.209719	0.191816	0.007653	0.257653	0.512755	0.793367	0.994898	0.005102	0.209184	0.52551	0.795918	1	0.002551	0.237245	0.443878	0.658163	0.905612	0.357143	0.058673	0.584184	0.033248	0.099744	0.012788	0.002551	0.247449	0.558673	0.875	1	0.040816	0.076531	0.091837	0.420918	0.818878	0.010204	0.306122	0.497449	0.670918	0.954082	0.533163	0.409207	0.010204	0.288265	0.520408	0.704082	0.959184	0.418367
0.397516	0.31677	0.285714	0.2125	0.20625	0.2	0.018634	0.167702	0.391304	0.602484	1	0.012422	0.229814	0.583851	0.850932	0.987578	0.006211	0.310559	0.596273	0.763975	0.993789	0.515528	0.15528	0.329193	0.075	0.0875	0	0.006211	0.267081	0.602484	0.857143	1	0.180124	0.571429	0.677019	0.732919	0.981366	0.018634	0.142857	0.329193	0.453416	0.78882	0.459627	0.325	0.080745	0.360248	0.614907	0.751553	0.981366	0.304348
0.216931	0.582011	0.201058	0.260638	0.079787	0.244681	0.015873	0.079365	0.365079	0.592593	0.883598	0.010582	0.301587	0.539683	0.78836	1	0.005291	0.222222	0.455026	0.719577	0.989418	0.878307	0.037037	0.084656	0.021277	0.021277	0	0.005291	0.26455	0.560847	0.777778	1	0.153439	0.153439	0.164021	0.312169	0.322751	0.201058	0.216931	0.42328	0.444444	0.465608	0.359788	0.276596	0.10582	0.253968	0.359788	0.619048	0.989418	0.619048
0.423913	0.293478	0.282609	0.274725	0.263736	0.142857	0.021739	0.282609	0.5	0.782609	1	0.032609	0.152174	0.402174	0.619565	0.967391	0.01087	0.23913	0.48913	0.728261	0.934783	0.543478	0.119565	0.336957	0.10989	0.087912	0	0.01087	0.206522	0.467391	0.663043	1	0.032609	0.043478	0.304348	0.543478	0.728261	0.076087	0.391304	0.619565	0.891304	0.978261	0.413043	0.43956	0.032609	0.217391	0.48913	0.706522	0.967391	0.25
0.347911	0.330418	0.321672	0.218872	0.216926	0.236381	0.001944	0.237123	0.458698	0.718173	0.996113	0.007775	0.242954	0.50826	0.750243	0.999028	0.000972	0.262391	0.52964	0.773567	1	0.471331	0.200194	0.328474	0.070039	0.064202	0.007782	0.000972	0.272109	0.456754	0.746356	1	0.004859	0.283771	0.489796	0.742468	0.979592	0.015549	0.195335	0.601555	0.783285	0.897959	0.535471	0.340467	0.002915	0.250729	0.52964	0.762877	0.998056	0.360544
0.433333	0.327381	0.239286	0.280095	0.1764	0.16329	0.004762	0.205952	0.466667	0.8	1	0.002381	0.27619	0.464286	0.733333	0.99881	0.00119	0.385714	0.557143	0.719048	0.991667	0.560714	0.105952	0.333333	0.039333	0.082241	0.003576	0.00119	0.17619	0.345238	0.732143	1	0.014286	0.470238	0.597619	0.704762	0.795238	0.036905	0.415476	0.582143	0.807143	0.997619	0.392857	0.297974	0.008333	0.40119	0.536905	0.709524	0.964286	0.392857
0.382524	0.328155	0.28932	0.27821	0.208171	0.200389	0.005825	0.219417	0.47767	0.749515	0.998058	0.003883	0.260194	0.518447	0.737864	0.982524	0.001942	0.252427	0.479612	0.743689	1	0.568932	0.186408	0.24466	0.066148	0.058366	0.007782	0.001942	0.198058	0.574757	0.75534	1	0.01165	0.357282	0.499029	0.798058	0.996117	0.085437	0.273786	0.438835	0.625243	0.986408	0.48932	0.350195	0.013592	0.304854	0.524272	0.790291	0.996117	0.341748
0.404	0.284	0.312	0.212851	0.261044	0.192771	0.012	0.244	0.444	0.748	0.988	0.008	0.252	0.592	0.776	1	0.004	0.228	0.464	0.696	0.98	0.484	0.208	0.308	0.072289	0.032129	0	0.004	0.264	0.708	0.876	1	0.04	0.232	0.412	0.628	0.828	0.112	0.184	0.476	0.552	0.692	0.516	0.401606	0.02	0.228	0.48	0.684	0.98	0.284
0.419708	0.383212	0.19708	0.285714	0.190476	0.14652	0.014599	0.215328	0.452555	0.711679	0.992701	0.007299	0.262774	0.554745	0.773723	0.99635	0.00365	0.310219	0.419708	0.726277	1	0.656934	0.083942	0.259124	0.029304	0.058608	0	0.00365	0.208029	0.448905	0.715328	1	0.313869	0.328467	0.423358	0.474453	0.576642	0.010949	0.372263	0.605839	0.828467	0.992701	0.357664	0.380952	0.010949	0.321168	0.474453	0.806569	0.989051	0.39781
0.304688	0.382812	0.3125	0.212598	0.19685	0.23622	0.015625	0.234375	0.5	0.640625	0.945312	0.03125	0.164062	0.421875	0.773438	1	0.007812	0.25	0.515625	0.734375	0.953125	0.421875	0.164062	0.414062	0.055118	0.070866	0.007874	0.007812	0.132812	0.367188	0.75	1	0.078125	0.3125	0.40625	0.445312	0.742188	0.117188	0.46875	0.59375	0.835938	0.945312	0.460938	0.362205	0.039062	0.320312	0.53125	0.71875	0.929688	0.390625
0.296788	0.424142	0.27907	0.233925	0.149667	0.247228	0.00443	0.251384	0.417497	0.702104	0.993355	0.002215	0.241417	0.500554	0.730897	0.998893	0.001107	0.250277	0.554817	0.790698	1	0.728682	0.135105	0.136213	0.052106	0.043237	0.003326	0.001107	0.231451	0.440753	0.646733	1	0.045404	0.676633	0.787375	0.874862	0.991141	0.003322	0.178295	0.527132	0.82392	0.984496	0.334441	0.330377	0.005537	0.385382	0.677741	0.844961	0.996678	0.459579
0.358156	0.539007	0.102837	0.469751	0.085409	0.096085	0.01773	0.248227	0.446809	0.716312	0.989362	0.007092	0.35461	0.585106	0.765957	1	0.003546	0.06383	0.159574	0.301418	0.992908	0.826241	0.088652	0.085106	0.02847	0.021352	0	0.003546	0.365248	0.570922	0.776596	1	0.049645	0.141844	0.163121	0.216312	0.315603	0.095745	0.113475	0.234043	0.255319	0.921986	0.312057	0.320285	0.010638	0.141844	0.29078	0.514184	0.932624	0.5
0.310484	0.423387	0.266129	0.259109	0.17004	0.222672	0.008065	0.217742	0.475806	0.733871	0.979839	0.016129	0.266129	0.512097	0.762097	1	0.004032	0.258065	0.455645	0.677419	0.983871	0.306452	0.100806	0.592742	0.032389	0.11336	0	0.004032	0.153226	0.375	0.754032	1	0.451613	0.782258	0.830645	0.862903	0.891129	0.052419	0.274194	0.475806	0.641129	0.971774	0.475806	0.331984	0.064516	0.266129	0.459677	0.66129	0.983871	0.439516
0.284884	0.337209	0.377907	0.19883	0.210526	0.274854	0.046512	0.302326	0.546512	0.802326	0.965116	0.017442	0.226744	0.418605	0.662791	1	0.005814	0.255814	0.488372	0.738372	0.994186	0.406977	0.494186	0.098837	0.152047	0.023392	0	0.005814	0.319767	0.656977	0.773256	1	0.011628	0.30814	0.505814	0.744186	0.94186	0.087209	0.127907	0.151163	0.174419	0.203488	0.569767	0.397661	0.011628	0.27907	0.534884	0.744186	0.994186	0.354651
0.38756	0.296651	0.315789	0.197115	0.235577	0.201923	0.014354	0.239234	0.449761	0.717703	0.995215	0.009569	0.167464	0.511962	0.77512	1	0.004785	0.311005	0.516746	0.746411	0.980861	0.45933	0.15311	0.38756	0.057692	0.067308	0.019231	0.004785	0.148325	0.521531	0.755981	1	0.210526	0.473684	0.607656	0.942584	0.980861	0.038278	0.30622	0.416268	0.712919	0.913876	0.492823	0.432692	0.019139	0.334928	0.502392	0.727273	0.980861	0.301435
0.380531	0.292035	0.327434	0.276786	0.25	0.1875	0.017699	0.159292	0.424779	0.690265	1	0.035398	0.256637	0.539823	0.778761	0.99115	0.00885	0.238938	0.442478	0.752212	0.982301	0.460177	0.442478	0.097345	0.098214	0.044643	0.008929	0.00885	0.150442	0.504425	0.716814	1	0.026549	0.292035	0.451327	0.60177	0.911504	0.097345	0.106195	0.920354	0.946903	0.973451	0.380531	0.535714	0.026549	0.221239	0.39823	0.734513	0.955752	0.265487
0.349315	0.363014	0.287671	0.275862	0.193103	0.186207	0.027397	0.219178	0.5	0.787671	0.965753	0.013699	0.335616	0.513699	0.780822	1	0.006849	0.19863	0.417808	0.630137	0.972603	0.349315	0.164384	0.486301	0.062069	0.089655	0.006897	0.006849	0.226027	0.342466	0.876712	1	0.020548	0.082192	0.136986	0.19863	0.273973	0.280822	0.493151	0.630137	0.767123	0.979452	0.527397	0.413793	0.020548	0.246575	0.424658	0.630137	0.972603	0.369863
0.379971	0.33137	0.28866	0.255162	0.225664	0.171091	0.007364	0.21944	0.493373	0.75405	0.998527	0.004418	0.151694	0.427099	0.720177	1	0.001473	0.381443	0.578792	0.759941	0.995582	0.544919	0.142857	0.312224	0.048673	0.066372	0.007375	0.001473	0.148748	0.291605	0.628866	1	0.0162	0.509573	0.677467	0.801178	0.916053	0.125184	0.446244	0.606775	0.821797	0.989691	0.455081	0.327434	0.004418	0.416789	0.57732	0.78056	0.994109	0.37408
0.324324	0.388514	0.287162	0.240678	0.166102	0.264407	0.006757	0.287162	0.513514	0.790541	0.996622	0.013514	0.209459	0.476351	0.739865	1	0.003378	0.253378	0.5	0.682432	0.989865	0.432432	0.158784	0.408784	0.047458	0.088136	0	0.003378	0.148649	0.432432	0.709459	1	0.219595	0.310811	0.452703	0.648649	0.733108	0.074324	0.273649	0.533784	0.824324	0.976351	0.527027	0.359322	0.013514	0.27027	0.486486	0.685811	0.966216	0.429054
0.349456	0.394196	0.256348	0.276029	0.186441	0.196126	0.002418	0.245466	0.525998	0.775091	0.998791	0.003628	0.232164	0.438936	0.702539	0.991536	0.001209	0.291415	0.53688	0.756953	1	0.521161	0.182588	0.296252	0.076271	0.076271	0.001211	0.001209	0.2237	0.446191	0.70133	1	0.007255	0.409915	0.594921	0.787183	0.989117	0.021765	0.261185	0.540508	0.799274	0.974607	0.376058	0.309927	0.006046	0.330109	0.542926	0.764208	0.995163	0.434099
0.422509	0.315498	0.261993	0.297597	0.179298	0.190388	0.005535	0.191882	0.433579	0.739852	0.998155	0.00369	0.258303	0.49262	0.730627	0.99631	0.001845	0.359779	0.568266	0.761993	1	0.592251	0.226937	0.180812	0.103512	0.05915	0.003697	0.001845	0.201107	0.442804	0.774908	1	0.009225	0.383764	0.601476	0.763838	0.994465	0.04059	0.350554	0.501845	0.660517	0.98893	0.359779	0.32902	0.01107	0.400369	0.595941	0.782288	0.990775	0.376384
0.288298	0.511702	0.2	0.266241	0.134185	0.15655	0.007447	0.190426	0.412766	0.617021	0.994681	0.002128	0.344681	0.629787	0.819149	1	0.001064	0.140426	0.393617	0.601064	0.998936	0.741489	0.034043	0.224468	0.021299	0.055378	0	0.001064	0.345745	0.6	0.806383	1	0.026596	0.243617	0.296809	0.43617	0.989362	0.008511	0.075532	0.152128	0.473404	0.974468	0.502128	0.342918	0.004255	0.401064	0.665957	0.852128	0.995745	0.496809
0.355789	0.322105	0.322105	0.202532	0.21097	0.225738	0.012632	0.256842	0.425263	0.648421	0.997895	0.004211	0.261053	0.616842	0.829474	1	0.002105	0.214737	0.507368	0.745263	0.983158	0.456842	0.168421	0.374737	0.07173	0.037975	0	0.002105	0.208421	0.646316	0.831579	1	0.056842	0.635789	0.749474	0.863158	0.972632	0.008421	0.271579	0.366316	0.458947	0.593684	0.477895	0.434599	0.012632	0.267368	0.585263	0.785263	0.978947	0.351579
0.364692	0.29036	0.344948	0.206977	0.265116	0.206977	0.003484	0.229965	0.516841	0.761905	0.998839	0.009292	0.2741	0.505226	0.747967	0.996516	0.001161	0.24158	0.490128	0.739837	1	0.377468	0.038328	0.584204	0.019767	0.084884	0.005814	0.001161	0.28223	0.458769	0.684088	1	0.278746	0.384437	0.653891	0.832753	0.911731	0.036005	0.210221	0.511034	0.772358	0.996516	0.545877	0.355814	0.026713	0.296167	0.508711	0.757259	0.996516	0.305459
0.31825	0.355958	0.325792	0.220544	0.225076	0.247734	0.003017	0.238311	0.503771	0.764706	1	0.004525	0.24736	0.508296	0.722474	0.998492	0.001508	0.260935	0.491704	0.761689	0.996983	0.422323	0.162896	0.414781	0.066465	0.075529	0.018127	0.001508	0.236802	0.506787	0.714932	1	0.007541	0.297134	0.473605	0.820513	0.996983	0.028658	0.257919	0.497738	0.740573	0.995475	0.558069	0.44713	0.007541	0.279035	0.502262	0.760181	0.996983	0.3454
0.326733	0.346535	0.326733	0.23	0.24	0.19	0.039604	0.316832	0.50495	0.782178	1	0.019802	0.237624	0.485149	0.742574	0.970297	0.009901	0.188119	0.465347	0.70297	0.940594	0.485149	0.386139	0.128713	0.09	0.07	0.01	0.009901	0.247525	0.544554	0.871287	1	0.178218	0.29703	0.445545	0.594059	0.732673	0.069307	0.089109	0.118812	0.663366	0.831683	0.455446	0.38	0.049505	0.217822	0.435644	0.663366	0.960396	0.356436
0.362538	0.380665	0.256798	0.212121	0.19697	0.218182	0.009063	0.256798	0.510574	0.731118	1	0.006042	0.220544	0.564955	0.81571	0.996979	0.003021	0.223565	0.444109	0.628399	0.993958	0.63142	0.120846	0.247734	0.066667	0.072727	0	0.003021	0.199396	0.58006	0.803625	1	0.132931	0.268882	0.347432	0.833837	0.990937	0.072508	0.314199	0.483384	0.555891	0.691843	0.480363	0.406061	0.012085	0.265861	0.477341	0.734139	0.993958	0.350453
0.358904	0.367123	0.273973	0.236264	0.21978	0.233516	0.008219	0.260274	0.536986	0.726027	0.967123	0.005479	0.273973	0.509589	0.772603	1	0.00274	0.208219	0.421918	0.693151	0.983562	0.517808	0.279452	0.20274	0.104396	0.043956	0.010989	0.00274	0.309589	0.512329	0.715068	1	0.035616	0.167123	0.29863	0.865753	0.986301	0.008219	0.432877	0.632877	0.772603	0.827397	0.435616	0.340659	0.010959	0.208219	0.356164	0.810959	0.989041	0.394521
0.389937	0.36478	0.245283	0.259494	0.132911	0.196203	0.018868	0.150943	0.396226	0.660377	0.987421	0.012579	0.257862	0.572327	0.779874	0.993711	0.006289	0.358491	0.591195	0.754717	1	0.402516	0.106918	0.490566	0.037975	0.088608	0	0.006289	0.119497	0.283019	0.72956	1	0.522013	0.540881	0.704403	0.823899	0.855346	0.044025	0.327044	0.459119	0.666667	0.962264	0.440252	0.329114	0.188679	0.433962	0.603774	0.754717	0.974843	0.396226
0.401408	0.352113	0.246479	0.340426	0.184397	0.177305	0.021127	0.267606	0.507042	0.753521	0.985915	0.014085	0.232394	0.478873	0.746479	1	0.007042	0.21831	0.443662	0.65493	0.838028	0.239437	0.34507	0.415493	0.035461	0.078014	0.021277	0.007042	0.070423	0.359155	0.535211	1	0.098592	0.577465	0.661972	0.760563	0.852113	0.042254	0.253521	0.422535	0.56338	0.985915	0.429577	0.411348	0.105634	0.253521	0.457746	0.661972	0.929577	0.352113
0.356223	0.424893	0.218884	0.301724	0.116379	0.206897	0.012876	0.141631	0.381974	0.785408	1	0.008584	0.317597	0.532189	0.716738	0.995708	0.004292	0.304721	0.51073	0.695279	0.905579	0.429185	0.175966	0.39485	0.068966	0.068966	0.008621	0.004292	0.107296	0.270386	0.575107	1	0.2103	0.27897	0.339056	0.523605	0.60515	0.193133	0.618026	0.751073	0.88412	0.982833	0.454936	0.327586	0.038627	0.351931	0.553648	0.678112	0.918455	0.450644
0.34507	0.302817	0.352113	0.241135	0.22695	0.212766	0.035211	0.21831	0.464789	0.647887	0.957746	0.014085	0.267606	0.577465	0.823944	0.985915	0.007042	0.197183	0.450704	0.732394	1	0.380282	0.352113	0.267606	0.163121	0.049645	0.007092	0.007042	0.316901	0.556338	0.732394	1	0.169014	0.422535	0.577465	0.816901	0.992958	0.042254	0.098592	0.232394	0.295775	0.922535	0.478873	0.347518	0.035211	0.253521	0.612676	0.809859	1	0.316901
0.385542	0.373494	0.240964	0.333333	0.218182	0.163636	0.012048	0.216867	0.475904	0.728916	1	0.018072	0.295181	0.554217	0.837349	0.993976	0.006024	0.210843	0.439759	0.596386	0.957831	0.36747	0.307229	0.325301	0.09697	0.060606	0	0.006024	0.174699	0.445783	0.801205	1	0.036145	0.271084	0.391566	0.487952	0.927711	0.060241	0.596386	0.698795	0.777108	0.885542	0.379518	0.387879	0.03012	0.23494	0.415663	0.614458	0.957831	0.39759
0.307143	0.321429	0.371429	0.150538	0.229391	0.25448	0.017857	0.221429	0.489286	0.807143	0.982143	0.007143	0.307143	0.553571	0.696429	1	0.003571	0.210714	0.460714	0.714286	0.989286	0.364286	0.175	0.460714	0.050179	0.09319	0	0.003571	0.189286	0.442857	0.721429	1	0.157143	0.317857	0.414286	0.621429	0.714286	0.007143	0.221429	0.510714	0.810714	0.992857	0.546429	0.401434	0.014286	0.246429	0.464286	0.678571	0.989286	0.328571
0.2134	0.506203	0.280397	0.176617	0.121891	0.288557	0.012407	0.203474	0.406948	0.66005	0.990074	0.004963	0.28536	0.558313	0.801489	1	0.002481	0.218362	0.424318	0.669975	0.992556	0.585608	0.171216	0.243176	0.069652	0.049751	0	0.002481	0.295285	0.531017	0.801489	1	0.039702	0.129032	0.290323	0.615385	0.905707	0.096774	0.208437	0.419355	0.756824	0.985112	0.516129	0.378109	0.039702	0.28536	0.513648	0.813896	0.992556	0.513648
0.308355	0.391247	0.300398	0.248839	0.162575	0.246184	0.001989	0.28382	0.540451	0.780504	0.997347	0.001326	0.246684	0.465517	0.731432	0.998011	0.000663	0.232759	0.468833	0.736074	1	0.417109	0.288462	0.29443	0.105508	0.040478	0.001991	0.000663	0.210212	0.431034	0.756631	1	0.009947	0.145889	0.284483	0.418435	0.8687	0.554377	0.653183	0.737401	0.850796	0.998011	0.555703	0.353019	0.003316	0.232759	0.458886	0.695623	0.999337	0.403846
0.352723	0.30198	0.345297	0.206939	0.262701	0.221809	0.002475	0.263614	0.537129	0.758663	1	0.00495	0.257426	0.466584	0.722772	0.99505	0.001238	0.232673	0.49505	0.757426	0.998762	0.469059	0.243812	0.287129	0.094176	0.052045	0.002478	0.001238	0.231436	0.486386	0.752475	1	0.039604	0.201733	0.418317	0.74505	0.962871	0.006188	0.315594	0.538366	0.701733	0.992574	0.575495	0.406444	0.003713	0.256188	0.470297	0.737624	0.998762	0.310644
0.423077	0.330769	0.246154	0.302326	0.248062	0.100775	0.069231	0.238462	0.492308	0.753846	1	0.023077	0.284615	0.561538	0.692308	0.961538	0.007692	0.169231	0.330769	0.746154	0.992308	0.469231	0.215385	0.315385	0.077519	0.093023	0	0.007692	0.207692	0.523077	0.669231	1	0.192308	0.253846	0.323077	0.392308	0.484615	0.076923	0.146154	0.761538	0.869231	0.984615	0.361538	0.434109	0.015385	0.169231	0.392308	0.792308	0.992308	0.461538
0.311239	0.380403	0.308357	0.24531	0.151515	0.251082	0.004323	0.259366	0.505764	0.769452	1	0.002882	0.262248	0.534582	0.755043	0.997118	0.001441	0.223343	0.458213	0.71902	0.962536	0.476945	0.231988	0.291066	0.079365	0.056277	0.004329	0.001441	0.211816	0.43804	0.817003	1	0.025937	0.148415	0.423631	0.827089	0.933718	0.021614	0.40634	0.587896	0.736311	0.814121	0.518732	0.334776	0.014409	0.262248	0.471182	0.713256	0.933718	0.365994
0.337838	0.351351	0.310811	0.236806	0.215156	0.2341	0.008108	0.27973	0.521622	0.75	0.997297	0.002703	0.214865	0.468919	0.739189	0.998649	0.001351	0.262162	0.497297	0.754054	1	0.497297	0.164865	0.337838	0.069012	0.071719	0.006766	0.001351	0.217568	0.387838	0.718919	1	0.056757	0.262162	0.491892	0.693243	0.997297	0.005405	0.402703	0.571622	0.841892	0.985135	0.524324	0.359946	0.005405	0.222973	0.471622	0.744595	0.995946	0.378378
0.481928	0.253012	0.26506	0.268293	0.231707	0.121951	0.060241	0.289157	0.46988	0.686747	1	0.024096	0.26506	0.506024	0.831325	0.987952	0.012048	0.180723	0.481928	0.698795	0.903614	0.253012	0	0.746988	0	0.073171	0	0.012048	0.060241	0.325301	0.771084	1	0	0	0	0	0	0.072289	0.240964	0.493976	0.674699	0.927711	0.325301	0.365854	0.072289	0.192771	0.566265	0.795181	0.915663	0.277108
0.387781	0.284289	0.32793	0.208489	0.278402	0.179775	0.002494	0.253117	0.508728	0.760599	0.998753	0.004988	0.219451	0.445137	0.735661	1	0.001247	0.260599	0.516209	0.744389	0.997506	0.456359	0.249377	0.294264	0.099875	0.057428	0.002497	0.001247	0.23192	0.483791	0.745636	1	0.038653	0.170823	0.415212	0.78803	0.997506	0.006234	0.322943	0.573566	0.761845	0.991272	0.562344	0.39201	0.003741	0.269327	0.472569	0.738155	0.997506	0.336658
0.404153	0.311502	0.284345	0.2256	0.2272	0.1904	0.003195	0.289137	0.485623	0.746006	1	0.004792	0.242812	0.541534	0.784345	0.998403	0.001597	0.194888	0.460064	0.677316	0.996805	0.560703	0.051118	0.388179	0.0384	0.0864	0.0064	0.001597	0.400958	0.565495	0.813099	1	0.100639	0.522364	0.714058	0.771565	0.950479	0.007987	0.134185	0.329073	0.635783	0.996805	0.365815	0.3936	0.01278	0.185304	0.482428	0.709265	0.996805	0.321086
0.380734	0.344037	0.275229	0.262069	0.209195	0.206897	0.009174	0.222477	0.461009	0.736239	1	0.004587	0.192661	0.506881	0.75	0.997706	0.002294	0.327982	0.534404	0.772936	0.993119	0.527523	0.126147	0.34633	0.045977	0.082759	0.004598	0.002294	0.149083	0.376147	0.731651	1	0.020642	0.43578	0.573394	0.71789	0.844037	0.133028	0.355505	0.534404	0.816514	0.965596	0.493119	0.349425	0.018349	0.355505	0.559633	0.756881	0.993119	0.341743
0.325112	0.369955	0.304933	0.229213	0.211236	0.240449	0.011211	0.206278	0.419283	0.704036	0.997758	0.006726	0.295964	0.538117	0.784753	1	0.002242	0.230942	0.484305	0.737668	0.993274	0.381166	0.123318	0.495516	0.053933	0.094382	0	0.002242	0.394619	0.585202	0.782511	1	0.403587	0.571749	0.690583	0.85426	0.995516	0.008969	0.165919	0.320628	0.607623	0.896861	0.585202	0.319101	0.008969	0.226457	0.506726	0.706278	0.993274	0.396861
0.411205	0.479915	0.108879	0.299471	0.100529	0.078307	0.002114	0.204017	0.464059	0.729387	0.998943	0.003171	0.352008	0.57611	0.764271	1	0.001057	0.071882	0.149049	0.654334	0.995772	0.88055	0.01797	0.10148	0.008466	0.02328	0	0.001057	0.312896	0.538055	0.757928	1	0.088795	0.091966	0.504228	0.818182	0.831924	0.020085	0.056025	0.106765	0.137421	0.984144	0.086681	0.10582	0.004228	0.05814	0.096195	0.480973	0.990486	0.48203
0.364621	0.3213	0.314079	0.246377	0.257246	0.202899	0.01083	0.288809	0.498195	0.761733	1	0.00722	0.209386	0.527076	0.765343	0.981949	0.00361	0.220217	0.433213	0.696751	0.98556	0.285199	0.267148	0.447653	0.068841	0.061594	0.01087	0.00361	0.129964	0.451264	0.722022	1	0.028881	0.148014	0.314079	0.711191	0.99278	0.039711	0.407942	0.537906	0.750903	0.960289	0.472924	0.478261	0.025271	0.231047	0.527076	0.743682	0.98556	0.303249
0.407407	0.385185	0.207407	0.313433	0.179104	0.11194	0.044444	0.274074	0.592593	0.77037	0.992593	0.014815	0.22963	0.459259	0.807407	1	0.007407	0.148148	0.311111	0.548148	0.762963	0.540741	0.437037	0.022222	0.149254	0.014925	0	0.007407	0.340741	0.622222	0.837037	1	0.014815	0.148148	0.355556	0.555556	0.77037	0.844444	0.844444	0.844444	0.851852	0.859259	0.348148	0.402985	0.014815	0.17037	0.4	0.585185	0.859259	0.437037
0.250755	0.425982	0.323263	0.187879	0.178788	0.272727	0.006042	0.259819	0.528701	0.776435	1	0.012085	0.205438	0.471299	0.703927	0.996979	0.003021	0.265861	0.486405	0.746224	0.978852	0.601208	0.256798	0.141994	0.075758	0.039394	0.00303	0.003021	0.175227	0.519637	0.773414	1	0.012085	0.274924	0.410876	0.628399	0.930514	0.033233	0.335347	0.483384	0.734139	0.978852	0.577039	0.345455	0.012085	0.232628	0.438066	0.673716	0.978852	0.444109
0.378947	0.305263	0.315789	0.265957	0.255319	0.159574	0.021053	0.252632	0.484211	0.768421	1	0.042105	0.242105	0.410526	0.642105	0.989474	0.010526	0.2	0.547368	0.821053	0.957895	0.326316	0.294737	0.378947	0.106383	0.06383	0.021277	0.010526	0.147368	0.463158	0.6	1	0.042105	0.105263	0.515789	0.652632	0.968421	0.168421	0.252632	0.547368	0.810526	0.936842	0.494737	0.425532	0.042105	0.2	0.505263	0.705263	0.957895	0.315789
0.3475	0.305	0.3475	0.20802	0.245614	0.213033	0.01	0.2775	0.505	0.7875	1	0.0075	0.19	0.43	0.705	0.9975	0.0025	0.2625	0.5225	0.7625	0.985	0.345	0.0925	0.5625	0.0401	0.120301	0.005013	0.0025	0.225	0.425	0.735	1	0.055	0.115	0.1975	0.29	0.36	0.01	0.4	0.5875	0.775	0.985	0.545	0.41604	0.015	0.27	0.4625	0.6975	0.98	0.31
0.410909	0.381818	0.207273	0.29927	0.211679	0.149635	0.014545	0.250909	0.48	0.72	0.981818	0.007273	0.192727	0.436364	0.723636	1	0.003636	0.363636	0.607273	0.781818	0.996364	0.727273	0.036364	0.236364	0.021898	0.072993	0	0.003636	0.181818	0.432727	0.767273	1	0.807273	0.810909	0.872727	0.898182	0.909091	0.250909	0.356364	0.523636	0.661818	0.978182	0.243636	0.357664	0.010909	0.276364	0.549091	0.778182	0.985455	0.432727
0.334928	0.365231	0.299841	0.209265	0.20607	0.196486	0.025518	0.259968	0.539075	0.755981	0.998405	0.00319	0.14992	0.425837	0.757576	0.99681	0.001595	0.339713	0.507177	0.716108	1	0.424242	0.132376	0.443381	0.043131	0.091054	0.004792	0.001595	0.204147	0.460925	0.744817	1	0.271132	0.475279	0.633174	0.77512	0.856459	0.004785	0.244019	0.454545	0.748006	0.984051	0.494418	0.341853	0.015949	0.339713	0.518341	0.720893	0.99681	0.398724
0.375	0.381579	0.243421	0.317881	0.178808	0.145695	0.026316	0.269737	0.519737	0.717105	1	0.013158	0.217105	0.546053	0.815789	0.993421	0.006579	0.197368	0.375	0.585526	0.967105	0.592105	0.394737	0.013158	0.13245	0.013245	0	0.006579	0.282895	0.638158	0.848684	1	0.125	0.25	0.388158	0.585526	0.776316	0.085526	0.085526	0.085526	0.085526	0.092105	0.342105	0.384106	0.019737	0.203947	0.440789	0.611842	0.947368	0.381579
0.375	0.326923	0.298077	0.231884	0.26087	0.15942	0.009615	0.254808	0.509615	0.730769	0.985577	0.038462	0.230769	0.403846	0.663462	1	0.004808	0.206731	0.591346	0.75	0.990385	0.519231	0.153846	0.326923	0.086957	0.067633	0	0.004808	0.278846	0.408654	0.701923	1	0.009615	0.067308	0.591346	0.75	0.9375	0.096154	0.201923	0.567308	0.802885	0.995192	0.524038	0.376812	0.014423	0.346154	0.528846	0.759615	0.995192	0.336538
0.313152	0.402923	0.283925	0.225941	0.202929	0.225941	0.010438	0.367432	0.551148	0.755741	1	0.004175	0.177453	0.394572	0.720251	0.997912	0.002088	0.302714	0.51357	0.762004	0.991649	0.60334	0.14405	0.25261	0.054393	0.054393	0	0.002088	0.254697	0.507307	0.764092	1	0.068894	0.411273	0.584551	0.843424	0.983299	0.010438	0.179541	0.425887	0.638831	0.956159	0.511482	0.292887	0.008351	0.160752	0.384134	0.659708	0.987474	0.413361
0.33494	0.351807	0.313253	0.253623	0.229469	0.236715	0.004819	0.19759	0.518072	0.737349	0.987952	0.007229	0.284337	0.551807	0.775904	1	0.00241	0.236145	0.443373	0.681928	0.995181	0.566265	0.154217	0.279518	0.060386	0.060386	0.002415	0.00241	0.289157	0.554217	0.742169	1	0.151807	0.33253	0.443373	0.546988	0.850602	0.028916	0.142169	0.4	0.790361	0.927711	0.438554	0.362319	0.031325	0.236145	0.428916	0.650602	0.963855	0.387952
0.419492	0.266949	0.313559	0.242553	0.225532	0.178723	0.008475	0.228814	0.504237	0.745763	0.995763	0.072034	0.245763	0.495763	0.771186	1	0.004237	0.237288	0.466102	0.720339	0.970339	0.34322	0.09322	0.563559	0.025532	0.093617	0	0.004237	0.169492	0.474576	0.758475	1	0.444915	0.779661	0.834746	0.855932	0.881356	0.012712	0.233051	0.411017	0.648305	0.978814	0.512712	0.374468	0.025424	0.233051	0.444915	0.644068	0.970339	0.271186
0.304286	0.492857	0.202857	0.263233	0.134478	0.180258	0.005714	0.288571	0.558571	0.781429	0.998571	0.004286	0.21	0.381429	0.618571	0.994286	0.001429	0.39	0.68	0.827143	1	0.728571	0.065714	0.205714	0.02289	0.048641	0.005722	0.001429	0.181429	0.364286	0.545714	1	0.651429	0.724286	0.812857	0.872857	0.924286	0.554286	0.634286	0.744286	0.911429	0.995714	0.277143	0.228898	0.002857	0.63	0.74	0.864286	0.995714	0.471429
0.401961	0.294118	0.303922	0.237624	0.207921	0.178218	0.039216	0.27451	0.558824	0.735294	1	0.019608	0.22549	0.441176	0.794118	0.990196	0.009804	0.147059	0.45098	0.686275	0.892157	0.509804	0.196078	0.294118	0.089109	0.069307	0.009901	0.009804	0.215686	0.372549	0.647059	1	0.117647	0.284314	0.54902	0.686275	0.735294	0.029412	0.392157	0.470588	0.813725	0.892157	0.401961	0.356436	0.029412	0.176471	0.421569	0.686275	0.882353	0.27451
0.343434	0.36532	0.291246	0.236088	0.192243	0.205734	0.005051	0.149832	0.360269	0.70202	0.996633	0.003367	0.361953	0.553872	0.747475	0.998316	0.001684	0.276094	0.53367	0.772727	1	0.580808	0.153199	0.265993	0.072513	0.055649	0.001686	0.001684	0.26936	0.521886	0.717172	1	0.010101	0.36532	0.537037	0.744108	0.900673	0.042088	0.126263	0.340067	0.806397	0.984848	0.503367	0.37774	0.011785	0.340067	0.580808	0.781145	0.994949	0.372054
0.355556	0.288889	0.355556	0.235955	0.292135	0.235955	0.077778	0.311111	0.566667	0.833333	1	0.022222	0.233333	0.455556	0.666667	0.933333	0.011111	0.177778	0.4	0.711111	0.977778	0.388889	0.466667	0.144444	0.101124	0.05618	0.011236	0.011111	0.088889	0.444444	0.866667	1	0.222222	0.355556	0.533333	0.666667	0.833333	0.1	0.122222	0.155556	0.766667	0.955556	0.444444	0.292135	0.088889	0.344444	0.477778	0.733333	0.955556	0.311111
0.293388	0.429752	0.27686	0.294606	0.157676	0.244813	0.012397	0.243802	0.495868	0.752066	1	0.008264	0.231405	0.479339	0.764463	0.995868	0.004132	0.239669	0.504132	0.690083	0.979339	0.376033	0.103306	0.520661	0.033195	0.074689	0	0.004132	0.165289	0.458678	0.743802	1	0.429752	0.764463	0.81405	0.838843	0.880165	0.041322	0.247934	0.495868	0.632231	0.975207	0.483471	0.340249	0.049587	0.243802	0.442149	0.640496	0.966942	0.42562
0.31456	0.46978	0.215659	0.233838	0.169188	0.181568	0.004121	0.274725	0.524725	0.752747	1	0.002747	0.251374	0.471154	0.755495	0.997253	0.001374	0.230769	0.504121	0.718407	0.995879	0.678571	0.023352	0.298077	0.022008	0.055021	0	0.001374	0.299451	0.494505	0.725275	1	0.024725	0.255495	0.537088	0.726648	0.929945	0.063187	0.203297	0.506868	0.854396	0.989011	0.504121	0.404402	0.005495	0.243132	0.559066	0.718407	0.993132	0.48489
0.416667	0.25	0.333333	0.259542	0.274809	0.145038	0.037879	0.234848	0.469697	0.787879	0.984848	0.015152	0.181818	0.477273	0.674242	1	0.007576	0.325758	0.507576	0.734848	0.977273	0.507576	0.492424	0	0.167939	0	0	0.007576	0.265152	0.484848	0.719697	1	0.030303	0.204545	0.545455	0.742424	0.977273	0	0	0	0	0	0.393939	0.290076	0.045455	0.227273	0.545455	0.659091	0.977273	0.265152
0.415873	0.260317	0.32381	0.191083	0.321656	0.178344	0.009524	0.273016	0.520635	0.726984	1	0.019048	0.184127	0.422222	0.75873	0.993651	0.003175	0.247619	0.501587	0.777778	0.996825	0.212698	0.066667	0.720635	0.041401	0.079618	0.003185	0.003175	0.184127	0.412698	0.539683	1	0.11746	0.396825	0.485714	0.533333	0.996825	0.012698	0.263492	0.565079	0.755556	0.971429	0.450794	0.528662	0.012698	0.212698	0.47619	0.777778	0.996825	0.307937
0.429224	0.296804	0.273973	0.266055	0.252294	0.137615	0.018265	0.228311	0.429224	0.652968	1	0.009132	0.246575	0.611872	0.808219	0.972603	0.004566	0.255708	0.506849	0.757991	0.986301	0.347032	0.100457	0.552511	0.045872	0.082569	0	0.004566	0.369863	0.73516	0.913242	1	0.383562	0.712329	0.789954	0.826484	0.853881	0.027397	0.173516	0.347032	0.52968	0.872146	0.447489	0.40367	0.013699	0.242009	0.589041	0.776256	0.926941	0.237443
0.345196	0.405694	0.24911	0.282143	0.167857	0.207143	0.017794	0.263345	0.508897	0.864769	0.996441	0.010676	0.298932	0.572954	0.743772	1	0.003559	0.185053	0.409253	0.569395	0.967972	0.683274	0.120996	0.19573	0.064286	0.071429	0	0.003559	0.362989	0.565836	0.765125	1	0.039146	0.135231	0.19573	0.298932	0.822064	0.081851	0.227758	0.341637	0.857651	0.975089	0.430605	0.342857	0.035587	0.202847	0.476868	0.604982	0.967972	0.380783
0.379913	0.326055	0.294032	0.252187	0.218659	0.173469	0.002911	0.190684	0.481805	0.787482	1	0.007278	0.279476	0.525473	0.764192	0.995633	0.001456	0.272198	0.464338	0.695779	0.997089	0.515284	0.141194	0.343523	0.048105	0.077259	0.004373	0.001456	0.171761	0.481805	0.783115	1	0.004367	0.363901	0.554585	0.655022	0.803493	0.018923	0.295488	0.471616	0.739447	0.992722	0.455604	0.3207	0.004367	0.294032	0.464338	0.6754	0.997089	0.344978
0.244147	0.434783	0.32107	0.194631	0.201342	0.271812	0.006689	0.19398	0.411371	0.658863	0.989967	0.013378	0.250836	0.508361	0.782609	1	0.003344	0.277592	0.498328	0.725753	0.996656	0.428094	0.26087	0.311037	0.080537	0.04698	0.006711	0.003344	0.240803	0.538462	0.735786	1	0.113712	0.204013	0.424749	0.692308	0.819398	0.016722	0.347826	0.508361	0.889632	0.9699	0.555184	0.369128	0.010033	0.287625	0.491639	0.732441	0.996656	0.441472
0.270548	0.428082	0.30137	0.213058	0.182131	0.254296	0.013699	0.277397	0.558219	0.773973	1	0.006849	0.208904	0.462329	0.705479	0.989726	0.003425	0.284247	0.510274	0.739726	0.996575	0.428082	0.164384	0.407534	0.04811	0.082474	0	0.003425	0.14726	0.424658	0.691781	1	0.232877	0.383562	0.462329	0.657534	0.743151	0.085616	0.287671	0.554795	0.842466	0.993151	0.534247	0.398625	0.013699	0.263699	0.486301	0.671233	0.986301	0.462329
0.333333	0.466361	0.200306	0.279959	0.141254	0.193269	0.001019	0.205912	0.453109	0.700306	0.998981	0.003058	0.258919	0.492864	0.770642	0.99949	0.00051	0.286952	0.587156	0.787971	1	0.842508	0.043323	0.114169	0.028047	0.033146	0.00051	0.00051	0.253313	0.477064	0.754842	1	0.044343	0.166157	0.286952	0.546891	0.941896	0.001529	0.506626	0.712538	0.746177	0.992355	0.480632	0.321265	0.002039	0.268094	0.533639	0.817533	0.998471	0.488787
0.308707	0.426121	0.265172	0.241744	0.147952	0.244386	0.01847	0.257256	0.505277	0.774406	1	0.002639	0.234828	0.536939	0.773087	0.997361	0.001319	0.244063	0.437995	0.668865	0.996042	0.530343	0.139842	0.329815	0.059445	0.064729	0.001321	0.001319	0.224274	0.565963	0.864116	1	0.005277	0.275726	0.42876	0.576517	0.980211	0.025066	0.262533	0.478892	0.651715	0.832454	0.493404	0.346103	0.005277	0.275726	0.485488	0.700528	0.996042	0.465699
0.34205	0.354603	0.303347	0.237049	0.206698	0.21978	0.002615	0.239017	0.496339	0.745293	0.999477	0.001046	0.289749	0.526674	0.758891	1	0.000523	0.221757	0.462343	0.748954	0.998431	0.492678	0.106695	0.400628	0.048666	0.081109	0.002616	0.000523	0.312762	0.535565	0.737448	1	0.002615	0.244247	0.401151	0.573745	0.98431	0.018305	0.194561	0.5	0.804916	0.996339	0.529812	0.376766	0.001569	0.247385	0.508368	0.749477	0.998431	0.379184
0.478723	0.297872	0.223404	0.290323	0.204301	0.129032	0.031915	0.180851	0.425532	0.744681	0.989362	0.021277	0.276596	0.62766	0.765957	1	0.010638	0.297872	0.468085	0.617021	0.925532	0.148936	0.021277	0.829787	0.021505	0.064516	0	0.010638	0.031915	0.457447	0.702128	1	0.712766	0.712766	0.712766	0.712766	0.723404	0.053191	0.244681	0.489362	0.765957	0.978723	0.319149	0.430108	0.074468	0.297872	0.542553	0.712766	0.925532	0.234043
0.347107	0.318182	0.334711	0.215768	0.19917	0.240664	0.008264	0.22314	0.487603	0.719008	0.995868	0.016529	0.27686	0.545455	0.780992	0.979339	0.004132	0.247934	0.450413	0.714876	1	0.516529	0.330579	0.152893	0.13278	0.041494	0.016598	0.004132	0.264463	0.557851	0.818182	1	0.115702	0.285124	0.533058	0.731405	0.96281	0.008264	0.041322	0.099174	0.475207	0.987603	0.549587	0.390041	0.016529	0.31405	0.533058	0.780992	0.991736	0.285124
0.34875	0.413125	0.238125	0.258286	0.171357	0.174484	0.00125	0.328125	0.540625	0.7475	1	0.0025	0.1675	0.386875	0.695625	0.999375	0.000625	0.331875	0.573125	0.825	0.99375	0.626875	0.043125	0.33	0.023765	0.067542	0.001251	0.000625	0.181875	0.369375	0.670625	1	0.019375	0.111875	0.205625	0.4475	0.89125	0.100625	0.5325	0.695	0.87	0.996875	0.39	0.370231	0.006875	0.28	0.561875	0.801875	0.995625	0.435625
0.375	0.367647	0.257353	0.214815	0.2	0.177778	0.022059	0.242647	0.426471	0.676471	0.985294	0.014706	0.220588	0.536765	0.786765	1	0.007353	0.227941	0.477941	0.735294	0.977941	0.294118	0	0.705882	0	0.074074	0	0.007353	0.176471	0.639706	0.926471	1	0	0	0	0	0	0.058824	0.279412	0.455882	0.705882	0.897059	0.419118	0.474074	0.029412	0.308824	0.492647	0.698529	0.977941	0.338235
0.301994	0.384615	0.31339	0.225714	0.197143	0.222857	0.014245	0.293447	0.512821	0.752137	0.997151	0.005698	0.159544	0.430199	0.749288	1	0.002849	0.290598	0.541311	0.737892	0.988604	0.481481	0.518519	0	0.188571	0	0	0.002849	0.213675	0.48433	0.732194	1	0.039886	0.267806	0.507123	0.746439	0.985755	0	0	0	0	0	0.606838	0.382857	0.008547	0.264957	0.498575	0.720798	0.982906	0.452991
0.27381	0.375	0.35119	0.209581	0.161677	0.251497	0.041667	0.214286	0.440476	0.64881	0.964286	0.011905	0.244048	0.5	0.821429	1	0.005952	0.267857	0.535714	0.72619	0.994048	0.35119	0.017857	0.630952	0.011976	0.083832	0.011976	0.005952	0.095238	0.339286	0.797619	1	0.077381	0.077381	0.077381	0.083333	0.720238	0.119048	0.303571	0.535714	0.744048	0.940476	0.52381	0.39521	0.02381	0.267857	0.535714	0.744048	0.994048	0.428571
0.348148	0.390123	0.261728	0.242574	0.155941	0.217822	0.012346	0.207407	0.441975	0.619753	1	0.004938	0.293827	0.634568	0.814815	0.987654	0.002469	0.254321	0.491358	0.703704	0.997531	0.575309	0.091358	0.333333	0.034653	0.069307	0	0.002469	0.323457	0.644444	0.809877	1	0.333333	0.353086	0.434568	0.520988	0.997531	0.012346	0.091358	0.269136	0.567901	0.933333	0.483951	0.326733	0.009877	0.375309	0.619753	0.814815	0.997531	0.395062
0.310526	0.373684	0.315789	0.216931	0.195767	0.306878	0.042105	0.142105	0.426316	0.694737	0.973684	0.010526	0.242105	0.521053	0.726316	1	0.005263	0.294737	0.510526	0.773684	0.994737	0.373684	0.273684	0.352632	0.079365	0.100529	0.005291	0.005263	0.205263	0.531579	0.810526	1	0.142105	0.268421	0.357895	0.815789	0.931579	0.031579	0.110526	0.489474	0.7	0.863158	0.452632	0.42328	0.036842	0.278947	0.521053	0.763158	0.978947	0.389474
0.312727	0.363636	0.323636	0.255474	0.189781	0.215328	0.010909	0.232727	0.534545	0.76	0.996364	0.007273	0.207273	0.421818	0.672727	1	0.003636	0.290909	0.592727	0.781818	0.989091	0.527273	0.323636	0.149091	0.124088	0.036496	0	0.003636	0.178182	0.458182	0.68	1	0.098182	0.298182	0.443636	0.643636	0.869091	0.032727	0.789091	0.909091	0.952727	0.992727	0.56	0.328467	0.018182	0.294545	0.52	0.763636	0.989091	0.418182
0.323232	0.358586	0.318182	0.218274	0.218274	0.233503	0.040404	0.353535	0.585859	0.79798	0.964646	0.010101	0.151515	0.424242	0.686869	1	0.005051	0.232323	0.454545	0.707071	0.979798	0.510101	0.348485	0.141414	0.126904	0.045685	0.005076	0.005051	0.176768	0.429293	0.717172	1	0.237374	0.419192	0.555556	0.757576	0.984848	0.015152	0.045455	0.287879	0.89899	0.959596	0.388889	0.385787	0.020202	0.252525	0.520202	0.691919	0.979798	0.363636
0.421818	0.287273	0.290909	0.222628	0.262774	0.171533	0.010909	0.272727	0.490909	0.763636	1	0.007273	0.174545	0.498182	0.734545	0.941818	0.003636	0.247273	0.494545	0.705455	0.981818	0.312727	0.254545	0.432727	0.076642	0.069343	0.010949	0.003636	0.138182	0.534545	0.767273	1	0.050909	0.141818	0.283636	0.781818	0.967273	0.018182	0.374545	0.501818	0.712727	0.92	0.465455	0.459854	0.010909	0.24	0.498182	0.72	0.970909	0.290909
0.353312	0.312303	0.334385	0.205696	0.231013	0.205696	0.009464	0.246057	0.545741	0.788644	0.990536	0.006309	0.217666	0.476341	0.712934	0.996845	0.003155	0.26183	0.495268	0.722397	1	0.432177	0.173502	0.394322	0.06962	0.082278	0.012658	0.003155	0.208202	0.492114	0.776025	1	0.009464	0.11041	0.523659	0.687697	0.990536	0.07571	0.290221	0.422713	0.766562	0.987382	0.570978	0.35443	0.012618	0.264984	0.501577	0.690852	0.993691	0.29653
0.354571	0.385042	0.260388	0.266667	0.188889	0.208333	0.00831	0.299169	0.493075	0.736842	0.980609	0.00554	0.213296	0.501385	0.783934	1	0.00277	0.279778	0.495845	0.706371	0.98338	0.542936	0.290859	0.166205	0.088889	0.044444	0.005556	0.00277	0.177285	0.576177	0.792244	1	0.116343	0.238227	0.457064	0.747922	0.927978	0.310249	0.362881	0.493075	0.598338	0.980609	0.531856	0.311111	0.01108	0.240997	0.531856	0.745152	0.98892	0.398892
0.391892	0.304054	0.304054	0.278912	0.258503	0.142857	0.033784	0.222973	0.47973	0.777027	1	0.013514	0.202703	0.452703	0.736486	0.952703	0.006757	0.25	0.506757	0.702703	0.986486	0.493243	0.222973	0.283784	0.061224	0.047619	0.006803	0.006757	0.304054	0.601351	0.77027	1	0.358108	0.405405	0.567568	0.709459	0.878378	0.060811	0.121622	0.195946	0.472973	0.945946	0.412162	0.272109	0.060811	0.459459	0.621622	0.736486	0.939189	0.310811
0.387352	0.304348	0.3083	0.222222	0.238095	0.174603	0.011858	0.26087	0.505929	0.699605	0.972332	0.007905	0.245059	0.474308	0.750988	0.996047	0.003953	0.197628	0.517787	0.802372	1	0.407115	0.26087	0.332016	0.09127	0.059524	0.003968	0.003953	0.328063	0.525692	0.640316	1	0.011858	0.300395	0.743083	0.889328	0.988142	0.055336	0.150198	0.458498	0.667984	0.818182	0.41502	0.380952	0.011858	0.201581	0.399209	0.802372	0.988142	0.312253
0.386207	0.234483	0.37931	0.125	0.354167	0.208333	0.013793	0.248276	0.510345	0.751724	1	0.034483	0.331034	0.524138	0.793103	0.972414	0.006897	0.2	0.462069	0.668966	0.97931	0.234483	0	0.765517	0	0.097222	0	0.006897	0.255172	0.517241	0.703448	1	0	0	0	0	0	0.013793	0.227586	0.475862	0.751724	0.986207	0.517241	0.402778	0.027586	0.317241	0.572414	0.737931	0.97931	0.289655
0.285106	0.404255	0.310638	0.24359	0.149573	0.247863	0.008511	0.208511	0.425532	0.791489	0.995745	0.021277	0.195745	0.476596	0.72766	1	0.004255	0.323404	0.519149	0.676596	0.970213	0.47234	0.242553	0.285106	0.068376	0.051282	0	0.004255	0.259574	0.378723	0.642553	1	0.114894	0.204255	0.514894	0.697872	0.834043	0.008511	0.4	0.591489	0.902128	0.974468	0.557447	0.307692	0.034043	0.314894	0.557447	0.73617	0.970213	0.451064
0.367758	0.269521	0.36272	0.204545	0.262626	0.194444	0.007557	0.198992	0.438287	0.725441	1	0.020151	0.241814	0.534005	0.763224	0.994962	0.002519	0.292191	0.508816	0.778338	0.997481	0.413098	0.100756	0.486146	0.045455	0.09596	0.010101	0.002519	0.168766	0.460957	0.707809	1	0.11335	0.559194	0.70529	0.861461	0.957179	0.007557	0.282116	0.443325	0.730479	0.984887	0.478589	0.368687	0.005038	0.370277	0.576826	0.793451	0.984887	0.304786
0.375839	0.328859	0.295302	0.290541	0.243243	0.168919	0.013423	0.241611	0.496644	0.751678	1	0.033557	0.214765	0.510067	0.738255	0.966443	0.006711	0.255034	0.463087	0.724832	0.986577	0.469799	0.530201	0	0.175676	0	0	0.006711	0.208054	0.436242	0.711409	1	0.053691	0.302013	0.52349	0.751678	0.986577	0	0	0	0	0	0.395973	0.337838	0.040268	0.362416	0.557047	0.751678	0.986577	0.328859
0.328502	0.400966	0.270531	0.256659	0.159806	0.232446	0.007246	0.2343	0.449275	0.673913	0.985507	0.004831	0.277778	0.628019	0.823671	0.997585	0.002415	0.231884	0.422705	0.615942	1	0.669082	0.171498	0.15942	0.067797	0.038741	0	0.002415	0.270531	0.657005	0.823671	1	0.009662	0.176329	0.359903	0.536232	0.927536	0.111111	0.198068	0.381643	0.512077	0.652174	0.574879	0.2954	0.009662	0.316425	0.666667	0.809179	0.995169	0.437198
0.457944	0.271028	0.271028	0.264151	0.273585	0.150943	0.018692	0.242991	0.46729	0.738318	1	0.065421	0.271028	0.523364	0.747664	0.990654	0.009346	0.224299	0.383178	0.64486	0.971963	0.457944	0.542056	0	0.207547	0	0	0.009346	0.271028	0.495327	0.728972	1	0.037383	0.233645	0.420561	0.766355	0.971963	0	0	0	0	0	0.439252	0.339623	0.037383	0.233645	0.514019	0.654206	0.971963	0.28972
0.348457	0.350272	0.30127	0.250909	0.201818	0.218182	0.016334	0.274047	0.551724	0.818512	1	0.00363	0.235935	0.517241	0.738657	0.99274	0.001815	0.23049	0.441016	0.656987	0.99637	0.479129	0.07078	0.450091	0.023636	0.081818	0.005455	0.001815	0.263158	0.642468	0.836661	1	0.056261	0.07078	0.190563	0.566243	0.764065	0.005445	0.299456	0.46098	0.624319	0.989111	0.515426	0.309091	0.00726	0.235935	0.466425	0.646098	0.99637	0.388385
0.398827	0.313783	0.28739	0.255882	0.235294	0.197059	0.017595	0.272727	0.504399	0.83871	1	0.005865	0.28739	0.560117	0.747801	0.970674	0.002933	0.178886	0.428152	0.648094	0.941349	0.390029	0.202346	0.407625	0.064706	0.052941	0.011765	0.002933	0.222874	0.636364	0.900293	1	0.02346	0.105572	0.240469	0.656891	0.806452	0.143695	0.331378	0.44868	0.71261	0.868035	0.439883	0.452941	0.008798	0.211144	0.472141	0.674487	0.970674	0.343109
0.355694	0.297972	0.346334	0.173437	0.239063	0.23125	0.0078	0.24337	0.471139	0.769111	0.99532	0.00468	0.25117	0.519501	0.703588	1	0.00156	0.24805	0.50858	0.764431	0.99844	0.308892	0.102964	0.588144	0.0375	0.084375	0.003125	0.00156	0.266771	0.541342	0.795632	1	0.082683	0.232449	0.687988	0.865835	0.926677	0.00624	0.25273	0.444618	0.664587	0.9922	0.51014	0.415625	0.00312	0.25741	0.514821	0.74103	0.99064	0.318253
0.462963	0.240741	0.296296	0.169811	0.320755	0.132075	0.074074	0.314815	0.481481	0.648148	0.981481	0.037037	0.259259	0.425926	0.722222	0.907407	0.018519	0.166667	0.296296	0.777778	1	0.537037	0.462963	0	0.150943	0	0	0.018519	0.314815	0.481481	0.611111	1	0.092593	0.185185	0.407407	0.851852	0.981481	0	0	0	0	0	0.277778	0.45283	0.092593	0.166667	0.296296	0.666667	0.888889	0.240741
0.344828	0.387931	0.267241	0.252174	0.208696	0.2	0.025862	0.301724	0.474138	0.784483	1	0.017241	0.189655	0.448276	0.715517	0.956897	0.008621	0.232759	0.525862	0.706897	0.991379	0.310345	0.232759	0.456897	0.069565	0.086957	0.017391	0.008621	0.215517	0.577586	0.715517	1	0.362069	0.508621	0.568966	0.706897	0.982759	0.051724	0.155172	0.301724	0.741379	0.905172	0.405172	0.504348	0.043103	0.267241	0.517241	0.715517	0.991379	0.413793
0.313589	0.397213	0.289199	0.223776	0.178322	0.244755	0.038328	0.229965	0.41115	0.783972	1	0.006969	0.292683	0.526132	0.686411	0.993031	0.003484	0.191638	0.508711	0.790941	0.989547	0.606272	0.188153	0.205575	0.083916	0.048951	0	0.003484	0.355401	0.529617	0.679443	1	0.010453	0.170732	0.313589	0.853659	0.993031	0.101045	0.146341	0.348432	0.804878	0.937282	0.439024	0.405594	0.010453	0.212544	0.522648	0.763066	0.993031	0.390244
0.381526	0.313253	0.305221	0.245968	0.225806	0.205645	0.012048	0.228916	0.445783	0.722892	1	0.008032	0.248996	0.502008	0.702811	0.951807	0.004016	0.269076	0.514056	0.783133	0.995984	0.457831	0.301205	0.240964	0.129032	0.064516	0	0.004016	0.257028	0.485944	0.714859	1	0.116466	0.261044	0.465863	0.73494	0.935743	0.008032	0.084337	0.51004	0.795181	0.987952	0.46988	0.41129	0.02008	0.309237	0.502008	0.738956	0.987952	0.349398
0.40367	0.275229	0.321101	0.203704	0.25	0.222222	0.027523	0.302752	0.633028	0.816514	1	0.018349	0.211009	0.53211	0.678899	0.990826	0.009174	0.201835	0.394495	0.577982	0.981651	0.522936	0.302752	0.174312	0.101852	0.046296	0.027778	0.009174	0.275229	0.669725	0.798165	1	0.201835	0.302752	0.40367	0.504587	0.926606	0.073394	0.100917	0.146789	0.53211	0.908257	0.449541	0.314815	0.06422	0.247706	0.40367	0.559633	0.981651	0.284404
0.304997	0.390006	0.304997	0.224713	0.195977	0.227011	0.001149	0.275129	0.490523	0.7444	0.999426	0.001723	0.210224	0.469845	0.740953	0.998851	0.000574	0.257323	0.536473	0.757611	1	0.548535	0.161401	0.290063	0.071264	0.064368	0.011494	0.000574	0.179782	0.441126	0.741528	1	0.015508	0.31189	0.531304	0.761631	0.995405	0.00919	0.283171	0.57668	0.74842	0.98162	0.487076	0.402299	0.005744	0.247559	0.51637	0.757036	0.998277	0.402642
0.29771	0.419847	0.282443	0.192308	0.161538	0.284615	0.022901	0.251908	0.580153	0.80916	0.992366	0.015267	0.229008	0.427481	0.671756	0.923664	0.007634	0.19084	0.480916	0.748092	1	0.526718	0.244275	0.229008	0.076923	0.046154	0	0.007634	0.221374	0.396947	0.839695	1	0.099237	0.183206	0.282443	0.603053	0.801527	0.40458	0.450382	0.51145	0.687023	0.984733	0.473282	0.4	0.068702	0.198473	0.419847	0.656489	0.977099	0.435115
0.40057	0.436921	0.162509	0.335949	0.126248	0.136947	0.002851	0.277263	0.472559	0.734141	0.997862	0.001426	0.19387	0.445474	0.686386	1	0.000713	0.342124	0.689237	0.828225	0.985745	0.726301	0.02067	0.253029	0.014265	0.079886	0	0.000713	0.181041	0.394868	0.671418	1	0.228083	0.246614	0.301497	0.689237	0.980043	0.315039	0.460442	0.727726	0.824661	0.98717	0.218817	0.215407	0.006415	0.600143	0.749109	0.866001	0.995011	0.432644
0.445321	0.296505	0.258174	0.231377	0.215576	0.170429	0.003382	0.229989	0.43292	0.721533	0.997745	0.002255	0.285231	0.551297	0.759865	0.998873	0.001127	0.275085	0.532131	0.770011	1	0.478016	0.19053	0.331454	0.072235	0.085779	0.002257	0.001127	0.207441	0.473506	0.737317	1	0.003382	0.290868	0.543405	0.782413	0.989853	0.016911	0.310034	0.51071	0.723788	0.978579	0.383315	0.31377	0.002255	0.29876	0.528749	0.776776	0.990981	0.337091
0.318043	0.385321	0.296636	0.254601	0.187117	0.251534	0.012232	0.211009	0.474006	0.697248	0.996942	0.006116	0.302752	0.556575	0.779817	1	0.003058	0.235474	0.446483	0.730887	0.984709	0.501529	0.262997	0.235474	0.104294	0.04908	0.01227	0.003058	0.238532	0.544343	0.7737	1	0.006116	0.250765	0.519878	0.666667	0.929664	0.024465	0.103976	0.461774	0.840979	0.981651	0.504587	0.368098	0.009174	0.302752	0.504587	0.727829	0.984709	0.373089
0.376344	0.290323	0.333333	0.219424	0.26259	0.172662	0.007168	0.25448	0.494624	0.727599	0.978495	0.02509	0.243728	0.544803	0.777778	1	0.003584	0.240143	0.458781	0.709677	0.97491	0.387097	0.168459	0.444444	0.05036	0.086331	0	0.003584	0.193548	0.455197	0.698925	1	0.16129	0.258065	0.390681	0.591398	0.681004	0.007168	0.225806	0.498208	0.799283	0.960573	0.55914	0.417266	0.017921	0.243728	0.46595	0.666667	0.97491	0.297491
0.334928	0.294258	0.370813	0.194245	0.280576	0.218225	0.004785	0.289474	0.509569	0.748804	0.997608	0.011962	0.200957	0.507177	0.729665	0.995215	0.002392	0.251196	0.4689	0.772727	1	0.361244	0.138756	0.5	0.076739	0.100719	0.004796	0.002392	0.212919	0.54067	0.799043	1	0.047847	0.174641	0.533493	0.92823	0.995215	0.009569	0.258373	0.476077	0.712919	0.942584	0.586124	0.364508	0.009569	0.244019	0.471292	0.674641	0.995215	0.322967
0.360294	0.283088	0.356618	0.173432	0.269373	0.214022	0.007353	0.261029	0.511029	0.779412	0.996324	0.022059	0.268382	0.522059	0.702206	1	0.003676	0.209559	0.455882	0.713235	0.988971	0.404412	0.172794	0.422794	0.055351	0.092251	0.00369	0.003676	0.205882	0.525735	0.713235	1	0.128676	0.227941	0.555147	0.599265	0.985294	0.022059	0.246324	0.485294	0.797794	0.981618	0.569853	0.398524	0.014706	0.227941	0.466912	0.672794	0.988971	0.3125
0.330508	0.347458	0.322034	0.212766	0.225532	0.229787	0.012712	0.199153	0.5	0.788136	1	0.008475	0.258475	0.483051	0.728814	0.991525	0.004237	0.254237	0.508475	0.720339	0.940678	0.45339	0.317797	0.228814	0.110638	0.076596	0	0.004237	0.233051	0.423729	0.665254	1	0.038136	0.173729	0.309322	0.516949	0.783898	0.432203	0.694915	0.834746	0.898305	0.987288	0.538136	0.357447	0.016949	0.258475	0.487288	0.707627	0.927966	0.34322
0.417391	0.243478	0.33913	0.192982	0.307018	0.157895	0.017391	0.2	0.469565	0.713043	1	0.052174	0.46087	0.634783	0.852174	0.982609	0.008696	0.182609	0.391304	0.669565	0.991304	0.408696	0.243478	0.347826	0.105263	0.070175	0	0.008696	0.182609	0.46087	0.634783	1	0.2	0.286957	0.391304	0.478261	0.565217	0.078261	0.156522	0.721739	0.843478	0.965217	0.417391	0.491228	0.034783	0.26087	0.486957	0.730435	0.956522	0.278261
0.3675	0.28	0.3525	0.192982	0.303258	0.218045	0.005	0.2575	0.4725	0.73	0.9975	0.01	0.1725	0.4375	0.745	0.9925	0.0025	0.3025	0.54	0.7625	1	0.34	0.1	0.56	0.0401	0.105263	0.005013	0.0025	0.2175	0.3875	0.7175	1	0.055	0.1725	0.2025	0.2875	0.36	0.0175	0.41	0.6175	0.7825	0.9925	0.5375	0.441103	0.0125	0.2475	0.4425	0.6925	0.995	0.2925
0.341176	0.382353	0.276471	0.248521	0.236686	0.218935	0.023529	0.276471	0.582353	0.841176	0.994118	0.011765	0.170588	0.441176	0.705882	1	0.005882	0.205882	0.411765	0.7	0.970588	0.376471	0.170588	0.452941	0.059172	0.08284	0	0.005882	0.141176	0.364706	0.582353	1	0.023529	0.058824	0.335294	0.4	0.805882	0.135294	0.441176	0.688235	0.852941	0.988235	0.417647	0.508876	0.029412	0.229412	0.441176	0.717647	0.970588	0.417647
0.446809	0.312057	0.241135	0.264286	0.214286	0.15	0.014184	0.269504	0.560284	0.836879	1	0.042553	0.219858	0.382979	0.702128	0.985816	0.007092	0.198582	0.496454	0.680851	0.957447	0.652482	0.035461	0.312057	0.05	0.05	0.007143	0.007092	0.255319	0.425532	0.822695	1	0.333333	0.333333	0.539007	0.815603	0.865248	0.035461	0.106383	0.609929	0.687943	0.808511	0.304965	0.285714	0.021277	0.368794	0.539007	0.702128	0.957447	0.319149
0.335714	0.371429	0.292857	0.223022	0.223022	0.201439	0.035714	0.178571	0.421429	0.692857	0.957143	0.014286	0.264286	0.45	0.721429	1	0.007143	0.25	0.557143	0.75	0.971429	0.514286	0.135714	0.35	0.043165	0.071942	0	0.007143	0.192857	0.371429	0.707143	1	0.207143	0.228571	0.464286	0.5	0.771429	0.042857	0.557143	0.642857	0.85	0.942857	0.421429	0.316547	0.021429	0.25	0.585714	0.757143	0.971429	0.371429
0.358242	0.432967	0.208791	0.248899	0.167401	0.143172	0.006593	0.224176	0.437363	0.672527	1	0.004396	0.27033	0.586813	0.815385	0.997802	0.002198	0.276923	0.483516	0.643956	0.995604	0.657143	0.063736	0.279121	0.030837	0.044053	0.004405	0.002198	0.210989	0.586813	0.784615	1	0.068132	0.32967	0.364835	0.417582	0.643956	0.101099	0.259341	0.501099	0.718681	0.947253	0.4	0.352423	0.017582	0.274725	0.483516	0.694505	0.971429	0.452747
0.378788	0.363636	0.257576	0.384615	0.215385	0.138462	0.045455	0.19697	0.484848	0.666667	1	0.030303	0.272727	0.469697	0.681818	0.984848	0.015152	0.212121	0.378788	0.757576	0.939394	0.515152	0.212121	0.272727	0.076923	0.076923	0.015385	0.015152	0.272727	0.5	0.666667	1	0.19697	0.227273	0.348485	0.393939	0.772727	0.106061	0.151515	0.621212	0.848485	0.924242	0.318182	0.369231	0.136364	0.257576	0.378788	0.757576	0.939394	0.348485
0.402299	0.298851	0.298851	0.242775	0.219653	0.202312	0.017241	0.281609	0.494253	0.787356	0.988506	0.011494	0.229885	0.528736	0.735632	1	0.005747	0.218391	0.431034	0.695402	0.994253	0.333333	0.08046	0.586207	0.034682	0.092486	0	0.005747	0.08046	0.402299	0.666667	1	0.413793	0.425287	0.448276	0.482759	0.522989	0.12069	0.275862	0.591954	0.804598	0.971264	0.442529	0.462428	0.04023	0.252874	0.505747	0.718391	0.971264	0.298851
0.380952	0.342857	0.27619	0.230769	0.269231	0.182692	0.095238	0.27619	0.504762	0.72381	0.971429	0.047619	0.333333	0.590476	0.819048	1	0.009524	0.114286	0.314286	0.628571	0.952381	0.228571	0	0.771429	0	0.076923	0	0.009524	0.057143	0.561905	0.809524	1	0	0	0	0	0	0.07619	0.285714	0.47619	0.695238	0.961905	0.333333	0.461538	0.028571	0.142857	0.466667	0.714286	0.952381	0.32381
0.309859	0.380282	0.309859	0.2	0.257143	0.214286	0.028169	0.211268	0.535211	0.859155	0.985915	0.056338	0.267606	0.521127	0.661972	1	0.014085	0.169014	0.43662	0.591549	0.887324	0.549296	0.323944	0.126761	0.142857	0.028571	0	0.014085	0.126761	0.408451	0.661972	1	0.15493	0.211268	0.422535	0.605634	0.774648	0.830986	0.84507	0.873239	0.901408	0.943662	0.366197	0.428571	0.070423	0.225352	0.492958	0.605634	0.943662	0.394366
0.436	0.372	0.192	0.281124	0.188755	0.136546	0.012	0.208	0.492	0.776	1	0.008	0.304	0.548	0.744	0.996	0.004	0.196	0.38	0.64	0.96	0.728	0.1	0.172	0.040161	0.048193	0	0.004	0.248	0.604	0.784	1	0.26	0.36	0.384	0.444	0.936	0.016	0.052	0.32	0.476	0.856	0.356	0.305221	0.052	0.384	0.636	0.768	0.944	0.344
0.297578	0.396194	0.306228	0.202773	0.202773	0.228769	0.00346	0.235294	0.487889	0.733564	0.99827	0.00692	0.280277	0.589965	0.806228	1	0.00173	0.238754	0.422145	0.622837	0.99654	0.615917	0.114187	0.269896	0.062392	0.058925	0	0.00173	0.354671	0.636678	0.802768	1	0.1609	0.247405	0.432526	0.676471	0.967128	0.044983	0.141869	0.3391	0.49654	0.99481	0.529412	0.34662	0.00519	0.269896	0.489619	0.747405	0.99654	0.416955
0.328059	0.418776	0.253165	0.262936	0.149947	0.214361	0.003165	0.301688	0.521097	0.78481	1	0.00211	0.194093	0.482068	0.751055	0.996835	0.001055	0.285865	0.474684	0.709916	0.995781	0.530591	0.147679	0.32173	0.057022	0.07603	0.004224	0.001055	0.163502	0.418776	0.724684	1	0.006329	0.277426	0.501055	0.664557	0.986287	0.059072	0.380802	0.580169	0.825949	0.996835	0.456751	0.310454	0.005274	0.318565	0.514768	0.725738	0.995781	0.433544
0.28752	0.418641	0.293839	0.256329	0.183544	0.216772	0.00316	0.208531	0.505529	0.791469	0.99684	0.004739	0.276461	0.522907	0.772512	1	0.00158	0.229068	0.450237	0.665087	0.960506	0.492891	0.127962	0.379147	0.047468	0.079114	0.003165	0.00158	0.153239	0.503949	0.870458	1	0.022117	0.35387	0.492891	0.64613	0.900474	0.064771	0.278041	0.473934	0.734597	0.85624	0.477093	0.363924	0.011058	0.274882	0.462875	0.672986	0.982622	0.43128
0.341677	0.319149	0.339174	0.218045	0.25188	0.223058	0.002503	0.276596	0.516896	0.770964	1	0.005006	0.226533	0.466834	0.71965	0.993742	0.001252	0.242804	0.494368	0.744681	0.997497	0.47184	0.245307	0.282854	0.107769	0.055138	0.002506	0.001252	0.235294	0.491865	0.734668	1	0.038798	0.198999	0.419274	0.797247	0.997497	0.006258	0.315394	0.536921	0.772215	0.992491	0.569462	0.41604	0.003755	0.26408	0.476846	0.743429	0.997497	0.331665
0.413333	0.36	0.226667	0.27027	0.162162	0.162162	0.04	0.2	0.506667	0.786667	0.96	0.026667	0.226667	0.36	0.613333	0.973333	0.013333	0.28	0.546667	0.666667	1	0.546667	0	0.453333	0	0.081081	0	0.013333	0.2	0.333333	0.6	1	0	0	0	0	0	0.133333	0.493333	0.653333	0.76	0.88	0.32	0.243243	0.08	0.466667	0.546667	0.626667	0.866667	0.373333
0.328213	0.351657	0.320129	0.217638	0.236246	0.219256	0.00485	0.206144	0.481811	0.755861	1	0.001617	0.264349	0.489086	0.731609	0.999192	0.000808	0.279709	0.524656	0.757478	0.997575	0.47211	0.144705	0.383185	0.054207	0.06877	0.005663	0.000808	0.226354	0.489895	0.770412	1	0.004042	0.219887	0.495554	0.691188	0.997575	0.058205	0.291835	0.521423	0.736459	0.991108	0.52304	0.380259	0.004042	0.292643	0.506871	0.746968	0.997575	0.354082
0.369309	0.323777	0.306914	0.214527	0.222973	0.190878	0.003373	0.165261	0.514334	0.777403	1	0.016863	0.252951	0.448567	0.733558	0.998314	0.001686	0.29511	0.49747	0.708263	0.989882	0.522766	0.150084	0.32715	0.052365	0.072635	0.005068	0.001686	0.129848	0.403035	0.76054	1	0.163575	0.413153	0.598651	0.718381	0.848229	0.145025	0.340641	0.509275	0.743676	0.920742	0.480607	0.320946	0.015177	0.303541	0.485666	0.706577	0.919056	0.367622
0.3	0.413333	0.286667	0.22964	0.192256	0.221629	0.005333	0.250667	0.510667	0.78	0.998667	0.006667	0.228	0.530667	0.721333	0.997333	0.001333	0.265333	0.445333	0.753333	1	0.632	0.184	0.184	0.093458	0.058745	0.00534	0.001333	0.221333	0.528	0.730667	1	0.004	0.297333	0.446667	0.797333	0.985333	0.033333	0.286667	0.458667	0.816	0.981333	0.550667	0.368491	0.012	0.313333	0.550667	0.748	0.996	0.442667
0.453202	0.344828	0.20197	0.30198	0.20297	0.128713	0.009852	0.270936	0.536946	0.753695	0.995074	0.019704	0.211823	0.507389	0.783251	1	0.004926	0.261084	0.428571	0.576355	0.990148	0.536946	0.128079	0.334975	0.074257	0.064356	0.00495	0.004926	0.216749	0.374384	0.788177	1	0.108374	0.339901	0.522167	0.655172	0.862069	0.019704	0.389163	0.571429	0.748768	0.985222	0.330049	0.366337	0.019704	0.20197	0.44335	0.581281	0.985222	0.344828
0.295345	0.382825	0.32183	0.211245	0.200803	0.235341	0.002408	0.271268	0.540931	0.761637	1	0.00321	0.213483	0.446228	0.716693	0.999197	0.000803	0.29053	0.520867	0.764045	0.997592	0.475923	0.108347	0.41573	0.04257	0.079518	0.004016	0.000803	0.158909	0.385233	0.684591	1	0.004815	0.307384	0.509631	0.697432	0.869984	0.024077	0.373997	0.616372	0.843499	0.998395	0.521669	0.380723	0.005618	0.284109	0.516854	0.748796	0.998395	0.403692
0.348092	0.367939	0.283969	0.266055	0.201835	0.203364	0.010687	0.276336	0.534351	0.778626	0.998473	0.006107	0.236641	0.50687	0.758779	1	0.001527	0.225954	0.453435	0.690076	0.983206	0.471756	0.120611	0.407634	0.042813	0.076453	0.006116	0.001527	0.233588	0.561832	0.871756	1	0.076336	0.305344	0.468702	0.601527	0.719084	0.00458	0.225954	0.459542	0.734351	0.885496	0.479389	0.318043	0.003053	0.267176	0.468702	0.677863	0.972519	0.39542
0.4	0.241379	0.358621	0.180556	0.277778	0.180556	0.027586	0.282759	0.517241	0.717241	0.972414	0.013793	0.158621	0.503448	0.765517	0.951724	0.006897	0.193103	0.434483	0.737931	1	0.365517	0.310345	0.324138	0.111111	0.083333	0.013889	0.006897	0.227586	0.448276	0.710345	1	0.02069	0.268966	0.489655	0.675862	0.993103	0.048276	0.117241	0.524138	0.793103	0.917241	0.503448	0.472222	0.02069	0.241379	0.475862	0.731034	0.97931	0.262069
0.324042	0.412892	0.263066	0.26178	0.148342	0.230366	0.005226	0.290941	0.517422	0.745645	1	0.003484	0.249129	0.583624	0.799652	0.998258	0.001742	0.200348	0.372822	0.585366	0.994774	0.529617	0.148084	0.3223	0.052356	0.073298	0.006981	0.001742	0.336237	0.679443	0.8223	1	0.085366	0.278746	0.409408	0.574913	0.958188	0.019164	0.172474	0.355401	0.527875	0.994774	0.445993	0.279232	0.019164	0.19338	0.372822	0.578397	0.994774	0.439024
0.356209	0.398693	0.245098	0.291803	0.157377	0.22623	0.006536	0.271242	0.5	0.751634	1	0.009804	0.24183	0.53268	0.781046	0.996732	0.003268	0.232026	0.447712	0.669935	0.980392	0.565359	0.169935	0.264706	0.068852	0.068852	0.003279	0.003268	0.20915	0.398693	0.702614	1	0.101307	0.156863	0.447712	0.578431	0.869281	0.01634	0.519608	0.696078	0.908497	0.977124	0.418301	0.367213	0.019608	0.248366	0.473856	0.650327	0.990196	0.401961
0.377823	0.340862	0.281314	0.263374	0.193416	0.183128	0.004107	0.246407	0.505133	0.770021	0.997947	0.008214	0.250513	0.517454	0.767967	1	0.002053	0.234086	0.474333	0.698152	0.98768	0.525667	0.164271	0.310062	0.076132	0.076132	0.002058	0.002053	0.205339	0.529774	0.800821	1	0.024641	0.135524	0.474333	0.804928	0.98768	0.008214	0.36345	0.494867	0.683778	0.944559	0.466119	0.329218	0.008214	0.377823	0.511294	0.755647	0.98768	0.342916
0.377323	0.29368	0.328996	0.227188	0.236499	0.216015	0.005576	0.249071	0.494424	0.728625	1	0.003717	0.230483	0.5	0.750929	0.994424	0.001859	0.254647	0.492565	0.756506	0.996283	0.364312	0.105948	0.52974	0.037244	0.096834	0	0.001859	0.217472	0.468401	0.633829	1	0.072491	0.386617	0.494424	0.929368	0.960967	0.037175	0.249071	0.557621	0.767658	0.992565	0.535316	0.372439	0.007435	0.226766	0.475836	0.715613	0.994424	0.258364
0.355422	0.36747	0.277108	0.269618	0.191147	0.181087	0.008032	0.2249	0.463855	0.753012	1	0.004016	0.263052	0.528112	0.769076	0.995984	0.002008	0.2751	0.516064	0.706827	0.981928	0.48996	0.160643	0.349398	0.078471	0.074447	0.01006	0.002008	0.251004	0.568273	0.807229	1	0.046185	0.192771	0.626506	0.773092	0.935743	0.02008	0.2751	0.445783	0.610442	0.993976	0.600402	0.321932	0.02008	0.285141	0.508032	0.706827	0.995984	0.381526
0.361702	0.414894	0.223404	0.344086	0.150538	0.11828	0.031915	0.223404	0.606383	0.776596	0.978723	0.021277	0.276596	0.489362	0.797872	1	0.010638	0.180851	0.351064	0.478723	0.712766	0.670213	0.234043	0.095745	0.107527	0.021505	0	0.010638	0.234043	0.56383	0.829787	1	0.12766	0.170213	0.276596	0.382979	0.553191	0.606383	0.617021	0.638298	0.659574	0.691489	0.319149	0.344086	0.06383	0.191489	0.404255	0.489362	0.691489	0.457447
0.36	0.36	0.28	0.28125	0.209821	0.196429	0.008889	0.248889	0.457778	0.751111	0.995556	0.044444	0.32	0.551111	0.742222	1	0.004444	0.173333	0.417778	0.72	0.951111	0.4	0.217778	0.382222	0.066964	0.058036	0.004464	0.004444	0.333333	0.671111	0.888889	1	0.137778	0.204444	0.373333	0.773333	0.866667	0.017778	0.106667	0.426667	0.524444	0.973333	0.462222	0.428571	0.026667	0.24	0.493333	0.68	0.862222	0.36
0.213518	0.572965	0.213518	0.216923	0.103077	0.224615	0.010753	0.278034	0.460829	0.691244	0.990783	0.003072	0.204301	0.517665	0.752688	1	0.001536	0.310292	0.519201	0.803379	0.998464	0.726575	0.105991	0.167435	0.047692	0.032308	0.007692	0.001536	0.218126	0.579109	0.761905	1	0.225806	0.34255	0.44086	0.921659	0.996928	0.059908	0.248848	0.371736	0.511521	0.990783	0.572965	0.323077	0.00768	0.325653	0.56682	0.738863	0.998464	0.62212
0.328571	0.414286	0.257143	0.323741	0.165468	0.201439	0.021429	0.221429	0.428571	0.728571	0.992857	0.014286	0.264286	0.542857	0.821429	1	0.007143	0.228571	0.464286	0.635714	0.957143	0.4	0.228571	0.371429	0.064748	0.079137	0.007194	0.007143	0.314286	0.6	0.864286	1	0.042857	0.092857	0.371429	0.464286	0.678571	0.135714	0.221429	0.571429	0.757143	0.971429	0.421429	0.388489	0.028571	0.207143	0.45	0.621429	0.964286	0.407143
0.329588	0.363296	0.307116	0.244361	0.221805	0.203008	0.011236	0.254682	0.456929	0.745318	0.988764	0.007491	0.277154	0.539326	0.7603	1	0.003745	0.235955	0.460674	0.689139	0.996255	0.434457	0.359551	0.205993	0.131579	0.033835	0.003759	0.003745	0.209738	0.498127	0.70412	1	0.097378	0.40824	0.595506	0.745318	0.925094	0.022472	0.161049	0.220974	0.940075	0.992509	0.509363	0.360902	0.014981	0.307116	0.520599	0.722846	0.985019	0.367041
0.422907	0.273128	0.303965	0.247788	0.252212	0.176991	0.039648	0.281938	0.550661	0.837004	1	0.035242	0.264317	0.497797	0.665198	0.929515	0.004405	0.15859	0.405286	0.660793	0.982379	0.370044	0.246696	0.38326	0.088496	0.079646	0	0.004405	0.237885	0.488987	0.85022	1	0.008811	0.123348	0.436123	0.612335	0.955947	0.101322	0.334802	0.585903	0.779736	0.903084	0.480176	0.460177	0.008811	0.246696	0.471366	0.665198	0.982379	0.299559
0.37395	0.380952	0.245098	0.304348	0.165498	0.178121	0.007003	0.271709	0.528011	0.80112	1	0.002801	0.256303	0.522409	0.780112	0.997199	0.001401	0.208683	0.418768	0.64986	0.957983	0.509804	0.121849	0.368347	0.040673	0.057504	0.007013	0.001401	0.292717	0.670868	0.872549	1	0.060224	0.264706	0.414566	0.539216	0.642857	0.004202	0.190476	0.406162	0.64986	0.757703	0.487395	0.350631	0.004202	0.229692	0.441176	0.654062	0.990196	0.389356
0.307339	0.380734	0.311927	0.198157	0.221198	0.253456	0.022936	0.261468	0.495413	0.811927	1	0.009174	0.169725	0.504587	0.784404	0.990826	0.004587	0.270642	0.481651	0.66055	0.880734	0.454128	0.366972	0.178899	0.115207	0.069124	0.004608	0.004587	0.266055	0.568807	0.802752	1	0.027523	0.302752	0.440367	0.619266	0.853211	0.091743	0.224771	0.555046	0.889908	0.977064	0.412844	0.442396	0.03211	0.252294	0.444954	0.66055	0.96789	0.422018
0.312253	0.375494	0.312253	0.253968	0.190476	0.234127	0.01581	0.213439	0.426877	0.731225	0.956522	0.007905	0.3083	0.549407	0.810277	1	0.003953	0.229249	0.482213	0.695652	0.988142	0.442688	0.189723	0.367589	0.063492	0.063492	0	0.003953	0.367589	0.754941	0.885375	1	0.142292	0.201581	0.355731	0.719368	0.833992	0.01581	0.110672	0.407115	0.501976	0.889328	0.41502	0.388889	0.019763	0.225296	0.442688	0.648221	0.972332	0.387352
0.370192	0.360577	0.269231	0.304348	0.21256	0.198068	0.014423	0.225962	0.418269	0.706731	1	0.009615	0.173077	0.475962	0.730769	0.995192	0.004808	0.427885	0.586538	0.798077	0.985577	0.456731	0.168269	0.375	0.072464	0.082126	0.024155	0.004808	0.153846	0.514423	0.706731	1	0.096154	0.293269	0.615385	0.947115	0.990385	0.043269	0.326923	0.4375	0.730769	0.923077	0.480769	0.415459	0.019231	0.346154	0.509615	0.735577	0.985577	0.346154
0.378995	0.406393	0.214612	0.33945	0.174312	0.155963	0.013699	0.26484	0.493151	0.680365	0.995434	0.009132	0.315068	0.607306	0.799087	0.981735	0.004566	0.146119	0.3379	0.561644	1	0.52968	0.223744	0.246575	0.091743	0.055046	0	0.004566	0.242009	0.511416	0.684932	1	0.091324	0.26484	0.456621	0.69863	0.908676	0.022831	0.219178	0.515982	0.922374	0.986301	0.388128	0.357798	0.031963	0.255708	0.43379	0.716895	0.986301	0.410959
0.296073	0.429003	0.274924	0.239394	0.190909	0.215152	0.006042	0.244713	0.477341	0.746224	0.996979	0.015106	0.326284	0.516616	0.803625	0.990937	0.003021	0.202417	0.401813	0.667674	1	0.513595	0.148036	0.338369	0.051515	0.057576	0.009091	0.003021	0.280967	0.486405	0.797583	1	0.057402	0.114804	0.537764	0.670695	0.78852	0.021148	0.241692	0.432024	0.722054	0.951662	0.41994	0.406061	0.015106	0.214502	0.486405	0.688822	0.987915	0.480363
0.475309	0.345679	0.179012	0.343653	0.126935	0.145511	0.009259	0.209877	0.435185	0.746914	0.966049	0.006173	0.314815	0.555556	0.771605	0.993827	0.003086	0.354938	0.478395	0.694444	1	0.506173	0.092593	0.401235	0.043344	0.080495	0.006192	0.003086	0.228395	0.41358	0.694444	1	0.012346	0.083333	0.395062	0.484568	0.932099	0.015432	0.367284	0.611111	0.762346	0.987654	0.287037	0.278638	0.012346	0.410494	0.574074	0.712963	0.987654	0.37963
0.356234	0.287532	0.356234	0.201531	0.267857	0.216837	0.007634	0.221374	0.468193	0.722646	0.987277	0.005089	0.290076	0.549618	0.804071	0.994911	0.002545	0.239186	0.470738	0.748092	1	0.358779	0.139949	0.501272	0.066327	0.071429	0.010204	0.002545	0.147583	0.384224	0.597964	1	0.058524	0.211196	0.394402	0.572519	0.900763	0.012723	0.29771	0.659033	0.821883	0.984733	0.559796	0.433673	0.010178	0.249364	0.503817	0.732824	0.979644	0.292621
0.394886	0.383523	0.221591	0.264957	0.196581	0.188034	0.008523	0.196023	0.482955	0.670455	0.988636	0.011364	0.269886	0.534091	0.8125	1	0.002841	0.241477	0.446023	0.732955	0.980114	0.789773	0.116477	0.09375	0.08547	0.051282	0.005698	0.002841	0.241477	0.525568	0.772727	1	0.03125	0.284091	0.653409	0.735795	0.920455	0.116477	0.247159	0.289773	0.502841	0.957386	0.238636	0.34188	0.03125	0.252841	0.420455	0.78125	0.980114	0.451705
0.382576	0.511364	0.106061	0.353612	0.095057	0.091255	0.015152	0.223485	0.575758	0.768939	0.996212	0.011364	0.253788	0.435606	0.69697	1	0.003788	0.227273	0.632576	0.715909	0.988636	0.931818	0.011364	0.056818	0.015209	0.015209	0	0.003788	0.231061	0.473485	0.734848	1	0.32197	0.32197	0.32197	0.325758	0.67803	0.704545	0.712121	0.727273	0.761364	0.776515	0.147727	0.205323	0.087121	0.594697	0.712121	0.859848	0.988636	0.492424
0.332	0.368	0.3	0.228916	0.164659	0.232932	0.008	0.22	0.528	0.832	0.996	0.044	0.204	0.4	0.68	1	0.004	0.296	0.54	0.76	0.984	0.464	0.184	0.352	0.052209	0.052209	0.012048	0.004	0.144	0.356	0.624	1	0.18	0.24	0.308	0.564	0.856	0.012	0.472	0.684	0.9	0.988	0.544	0.337349	0.024	0.312	0.552	0.756	0.984	0.412
0.356955	0.370079	0.272966	0.226316	0.2	0.181579	0.007874	0.314961	0.608924	0.834646	0.997375	0.005249	0.160105	0.430446	0.658793	1	0.002625	0.257218	0.493438	0.708661	0.955381	0.614173	0.175853	0.209974	0.065789	0.039474	0.002632	0.002625	0.223097	0.490814	0.779528	1	0.115486	0.204724	0.446194	0.690289	0.818898	0.073491	0.278215	0.564304	0.750656	0.989501	0.364829	0.342105	0.010499	0.259843	0.480315	0.711286	0.955381	0.391076
0.398649	0.297297	0.304054	0.244898	0.238095	0.14966	0.013514	0.22973	0.418919	0.716216	1	0.02027	0.297297	0.533784	0.844595	0.993243	0.006757	0.222973	0.5	0.702703	0.97973	0.25	0	0.75	0	0.108844	0	0.006757	0.263514	0.527027	0.797297	1	0	0	0	0	0	0.013514	0.216216	0.452703	0.716216	0.945946	0.513514	0.394558	0.027027	0.297297	0.52027	0.695946	0.905405	0.290541
0.38565	0.318386	0.295964	0.252252	0.247748	0.162162	0.017937	0.224215	0.502242	0.721973	1	0.008969	0.273543	0.430493	0.690583	0.950673	0.004484	0.210762	0.600897	0.798206	0.986547	0.506726	0.125561	0.367713	0.058559	0.058559	0.004505	0.004484	0.295964	0.421525	0.704036	1	0.080717	0.139013	0.609865	0.762332	0.932735	0.017937	0.201794	0.55157	0.793722	0.986547	0.497758	0.378378	0.026906	0.300448	0.533632	0.789238	0.986547	0.331839
0.390459	0.272085	0.337456	0.215929	0.270796	0.226549	0.0053	0.265018	0.510601	0.773852	1	0.003534	0.210247	0.484099	0.710247	0.992933	0.001767	0.256184	0.501767	0.734982	0.998233	0.397527	0.393993	0.208481	0.113274	0.046018	0.017699	0.001767	0.263251	0.558304	0.773852	1	0.040636	0.226148	0.496466	0.69258	0.925795	0.0053	0.174912	0.397527	0.779152	0.992933	0.44523	0.4	0.008834	0.240283	0.484099	0.722615	0.992933	0.305654
0.38835	0.368932	0.242718	0.284314	0.205882	0.215686	0.067961	0.339806	0.61165	0.796117	0.990291	0.019417	0.213592	0.495146	0.747573	1	0.009709	0.165049	0.330097	0.572816	0.961165	0.543689	0.242718	0.213592	0.176471	0.039216	0	0.009709	0.349515	0.669903	0.84466	1	0.019417	0.262136	0.398058	0.475728	0.883495	0.135922	0.174757	0.23301	0.543689	0.601942	0.378641	0.392157	0.029126	0.203883	0.417476	0.572816	0.961165	0.38835
0.413793	0.275862	0.310345	0.207921	0.287129	0.20297	0.014778	0.231527	0.497537	0.763547	0.995074	0.068966	0.261084	0.502463	0.729064	1	0.004926	0.226601	0.463054	0.714286	0.955665	0.433498	0.438424	0.128079	0.118812	0.039604	0	0.004926	0.285714	0.576355	0.837438	1	0.009852	0.305419	0.463054	0.635468	0.881773	0.078818	0.103448	0.241379	0.660099	0.955665	0.428571	0.435644	0.014778	0.236453	0.44335	0.674877	0.8867	0.295567
0.282051	0.389744	0.328205	0.21134	0.201031	0.257732	0.030769	0.307692	0.558974	0.764103	0.994872	0.010256	0.179487	0.425641	0.717949	1	0.005128	0.271795	0.476923	0.774359	0.989744	0.507692	0.4	0.092308	0.139175	0.036082	0.005155	0.005128	0.230769	0.482051	0.717949	1	0.035897	0.210256	0.425641	0.733333	0.933333	0.538462	0.589744	0.615385	0.953846	0.984615	0.512821	0.350515	0.025641	0.25641	0.45641	0.728205	0.989744	0.394872
0.30094	0.369906	0.329154	0.207547	0.194969	0.254717	0.012539	0.275862	0.564263	0.777429	0.974922	0.009404	0.206897	0.479624	0.677116	1	0.003135	0.257053	0.501567	0.758621	0.996865	0.420063	0.23511	0.344828	0.069182	0.062893	0	0.003135	0.203762	0.460815	0.648903	1	0.031348	0.181818	0.54232	0.796238	0.949843	0.0721	0.341693	0.510972	0.705329	0.990596	0.561129	0.339623	0.025078	0.213166	0.476489	0.727273	0.99373	0.388715
0.328767	0.394521	0.276712	0.252747	0.173077	0.17033	0.005479	0.219178	0.463014	0.726027	1	0.016438	0.252055	0.542466	0.805479	0.989041	0.00274	0.30137	0.479452	0.673973	0.994521	0.545205	0.189041	0.265753	0.07967	0.074176	0.002747	0.00274	0.249315	0.536986	0.772603	1	0.035616	0.391781	0.512329	0.641096	0.936986	0.005479	0.139726	0.276712	0.789041	0.917808	0.471233	0.368132	0.010959	0.345205	0.515068	0.715068	0.994521	0.405479
0.317422	0.348449	0.334129	0.198565	0.236842	0.205742	0.011933	0.195704	0.47494	0.754177	0.988067	0.004773	0.288783	0.5179	0.71599	1	0.002387	0.23389	0.472554	0.74463	0.997613	0.417661	0.217184	0.365155	0.078947	0.064593	0.002392	0.002387	0.300716	0.53222	0.799523	1	0.114558	0.281623	0.539379	0.789976	0.983294	0.009547	0.195704	0.396181	0.625298	0.940334	0.560859	0.392344	0.009547	0.28401	0.4821	0.725537	0.990453	0.338902
0.321782	0.425743	0.252475	0.258706	0.149254	0.233831	0.029703	0.391089	0.544554	0.717822	0.970297	0.009901	0.212871	0.450495	0.792079	1	0.00495	0.128713	0.356436	0.688119	0.990099	0.430693	0.138614	0.430693	0.074627	0.044776	0.004975	0.00495	0.207921	0.39604	0.871287	1	0.014851	0.128713	0.29703	0.371287	0.89604	0.019802	0.470297	0.579208	0.712871	0.861386	0.39604	0.457711	0.019802	0.282178	0.405941	0.722772	0.980198	0.445545
0.347737	0.308642	0.343621	0.2	0.263918	0.220619	0.004115	0.230453	0.520576	0.76749	1	0.018519	0.286008	0.479424	0.716049	0.993827	0.002058	0.220165	0.49177	0.726337	0.997942	0.37037	0.222222	0.407407	0.076289	0.080412	0.002062	0.002058	0.288066	0.528807	0.781893	1	0.006173	0.164609	0.339506	0.648148	0.987654	0.037037	0.257202	0.54321	0.746914	0.969136	0.590535	0.424742	0.006173	0.269547	0.475309	0.691358	0.987654	0.314815
0.320843	0.367681	0.311475	0.215962	0.201878	0.241784	0.014052	0.257611	0.487119	0.765808	0.990632	0.004684	0.266979	0.517564	0.761124	1	0.002342	0.224824	0.473068	0.69555	0.997658	0.442623	0.081967	0.47541	0.032864	0.089202	0.004695	0.002342	0.234192	0.447307	0.763466	1	0.01171	0.032787	0.222482	0.501171	0.819672	0.070258	0.358314	0.548009	0.737705	0.995316	0.559719	0.342723	0.01171	0.323185	0.533958	0.721311	0.997658	0.388759
0.394928	0.235507	0.369565	0.152727	0.32	0.167273	0.007246	0.231884	0.471014	0.768116	0.996377	0.01087	0.224638	0.543478	0.67029	0.963768	0.003623	0.26087	0.503623	0.742754	1	0.394928	0.188406	0.416667	0.050909	0.094545	0.007273	0.003623	0.163043	0.40942	0.666667	1	0.134058	0.300725	0.387681	0.612319	0.706522	0.036232	0.264493	0.539855	0.84058	0.992754	0.550725	0.421818	0.021739	0.23913	0.481884	0.684783	0.98913	0.271739
0.27027	0.525799	0.203931	0.275862	0.110837	0.192118	0.004914	0.199017	0.371007	0.55774	1	0.009828	0.358722	0.628993	0.798526	0.995086	0.002457	0.154791	0.353808	0.58231	0.987715	0.710074	0.149877	0.140049	0.059113	0.039409	0	0.002457	0.429975	0.643735	0.820639	1	0.027027	0.125307	0.206388	0.375921	0.459459	0.017199	0.149877	0.240786	0.334152	0.484029	0.513514	0.305419	0.022113	0.336609	0.565111	0.712531	0.990172	0.530713
0.360294	0.25	0.389706	0.177778	0.251852	0.162963	0.036765	0.25	0.477941	0.735294	0.985294	0.051471	0.330882	0.514706	0.625	0.977941	0.007353	0.205882	0.404412	0.786765	1	0.595588	0.397059	0.007353	0.140741	0.007407	0.007407	0.007353	0.367647	0.544118	0.691176	1	0.014706	0.161765	0.316176	0.794118	0.992647	0.397059	0.397059	0.397059	0.397059	0.397059	0.536765	0.340741	0.014706	0.323529	0.558824	0.772059	0.977941	0.227941
0.27957	0.461022	0.259409	0.275908	0.164199	0.216689	0.00672	0.228495	0.452957	0.696237	1	0.002688	0.254032	0.52957	0.780914	0.987903	0.001344	0.262097	0.49328	0.715054	0.994624	0.747312	0.145161	0.107527	0.069987	0.026918	0	0.001344	0.252688	0.497312	0.748656	1	0.041667	0.27957	0.534946	0.790323	0.954301	0.020161	0.125	0.348118	0.569892	0.995968	0.610215	0.347241	0.014785	0.31586	0.611559	0.797043	0.994624	0.408602
0.349709	0.35682	0.293471	0.249677	0.209573	0.217982	0.003232	0.231416	0.499677	0.765999	0.998061	0.001293	0.264383	0.488688	0.745314	1	0.000646	0.247576	0.506141	0.741435	0.995475	0.472527	0.166774	0.360698	0.06533	0.069211	0.005821	0.000646	0.275372	0.455074	0.754363	1	0.019392	0.270847	0.461538	0.769231	0.960569	0.02521	0.173885	0.54234	0.734971	0.995475	0.528119	0.40621	0.001939	0.25404	0.500323	0.736264	0.996768	0.355527
0.352227	0.340081	0.307692	0.272358	0.223577	0.178862	0.020243	0.263158	0.550607	0.805668	0.995951	0.02834	0.251012	0.510121	0.757085	1	0.004049	0.190283	0.421053	0.688259	0.967611	0.437247	0.182186	0.380567	0.056911	0.065041	0.00813	0.004049	0.364372	0.753036	0.874494	1	0.133603	0.190283	0.340081	0.578947	0.834008	0.016194	0.105263	0.404858	0.566802	0.983806	0.425101	0.406504	0.032389	0.226721	0.449393	0.623482	0.967611	0.299595
0.364583	0.354167	0.28125	0.263158	0.242105	0.189474	0.03125	0.21875	0.416667	0.677083	0.958333	0.020833	0.270833	0.5625	0.770833	1	0.010417	0.197917	0.40625	0.697917	0.947917	0.239583	0	0.760417	0	0.063158	0	0.010417	0.4375	0.708333	0.9375	1	0	0	0	0	0	0.052083	0.229167	0.416667	0.635417	0.90625	0.3125	0.463158	0.072917	0.25	0.53125	0.697917	0.947917	0.34375
0.348238	0.407859	0.243902	0.255088	0.195387	0.170963	0.00813	0.239837	0.463415	0.701897	0.998645	0.00271	0.226287	0.440379	0.765583	0.99729	0.001355	0.314363	0.571816	0.768293	1	0.655827	0.150407	0.193767	0.067843	0.059701	0.005427	0.001355	0.222222	0.428184	0.677507	1	0.014905	0.318428	0.577236	0.754743	0.936314	0.02168	0.384824	0.558266	0.882114	0.993225	0.397019	0.415197	0.01355	0.342818	0.554201	0.772358	0.993225	0.399729
0.364162	0.379576	0.256262	0.223938	0.179537	0.19305	0.003854	0.211946	0.358382	0.628131	1	0.011561	0.331407	0.570328	0.803468	0.998073	0.001927	0.294798	0.554913	0.77264	0.988439	0.412331	0.184971	0.402697	0.069498	0.050193	0	0.001927	0.325626	0.543353	0.7842	1	0.007707	0.462428	0.60501	0.894027	0.988439	0.026975	0.125241	0.265896	0.660886	0.961464	0.398844	0.355212	0.00578	0.304432	0.55684	0.77264	0.988439	0.38921
0.307692	0.346154	0.346154	0.203883	0.23301	0.223301	0.057692	0.403846	0.615385	0.759615	1	0.028846	0.240385	0.480769	0.788462	0.990385	0.009615	0.182692	0.375	0.605769	0.961538	0.451923	0.548077	0	0.174757	0	0	0.009615	0.298077	0.538462	0.807692	1	0.019231	0.192308	0.375	0.673077	0.951923	0	0	0	0	0	0.346154	0.504854	0.019231	0.192308	0.442308	0.701923	0.961538	0.346154
0.386364	0.378788	0.234848	0.267176	0.160305	0.152672	0.037879	0.30303	0.560606	0.780303	0.992424	0.045455	0.25	0.537879	0.787879	1	0.007576	0.098485	0.310606	0.530303	0.833333	0.469697	0.19697	0.333333	0.061069	0.045802	0.015267	0.007576	0.295455	0.469697	0.878788	1	0.015152	0.212121	0.424242	0.5	0.818182	0.05303	0.128788	0.590909	0.674242	0.80303	0.310606	0.274809	0.022727	0.181818	0.416667	0.590909	0.863636	0.378788
0.297483	0.359268	0.343249	0.194954	0.197248	0.21789	0.016018	0.299771	0.540046	0.782609	1	0.004577	0.19222	0.448513	0.709382	0.988558	0.002288	0.258581	0.501144	0.759725	0.997712	0.432494	0.162471	0.405034	0.052752	0.084862	0.002294	0.002288	0.203661	0.405034	0.684211	1	0.128146	0.356979	0.533181	0.87643	0.997712	0.01373	0.221968	0.560641	0.791762	0.965675	0.569794	0.302752	0.016018	0.263158	0.466819	0.732265	0.995423	0.372998
0.391555	0.301344	0.307102	0.230769	0.215385	0.198077	0.003839	0.337812	0.59309	0.823417	0.998081	0.011516	0.190019	0.433781	0.68714	1	0.001919	0.209213	0.426104	0.644914	0.990403	0.428023	0.143954	0.428023	0.046154	0.088462	0.007692	0.001919	0.241843	0.602687	0.873321	1	0.090211	0.289827	0.428023	0.587332	0.681382	0.017274	0.230326	0.466411	0.740883	0.988484	0.474088	0.319231	0.011516	0.1881	0.380038	0.600768	0.934741	0.347409
0.346667	0.324848	0.328485	0.234223	0.230583	0.200243	0.002424	0.281212	0.547879	0.764848	1	0.008485	0.259394	0.511515	0.818182	0.997576	0.001212	0.214545	0.430303	0.665455	0.950303	0.408485	0.191515	0.4	0.076456	0.071602	0.015777	0.001212	0.237576	0.527273	0.833939	1	0.006061	0.289697	0.541818	0.749091	0.973333	0.014545	0.252121	0.46303	0.699394	0.945455	0.524848	0.424757	0.004848	0.219394	0.442424	0.733333	0.993939	0.315152
0.462451	0.359684	0.177866	0.345238	0.150794	0.107143	0.011858	0.209486	0.466403	0.747036	1	0.007905	0.316206	0.533597	0.727273	0.988142	0.003953	0.193676	0.347826	0.743083	0.956522	0.758893	0.146245	0.094862	0.047619	0.031746	0.015873	0.003953	0.312253	0.549407	0.73913	1	0.106719	0.150198	0.201581	0.324111	0.391304	0.245059	0.379447	0.841897	0.865613	0.928854	0.343874	0.293651	0.110672	0.241107	0.43083	0.798419	0.956522	0.367589
0.422727	0.270455	0.306818	0.223235	0.275626	0.159453	0.006818	0.234091	0.468182	0.747727	1	0.009091	0.236364	0.440909	0.684091	0.993182	0.002273	0.293182	0.577273	0.781818	0.990909	0.395455	0.095455	0.509091	0.029613	0.111617	0.020501	0.002273	0.236364	0.434091	0.684091	1	0.084091	0.231818	0.695455	0.745455	0.940909	0.011364	0.25	0.504545	0.772727	0.988636	0.459091	0.451025	0.009091	0.293182	0.586364	0.772727	0.990909	0.281818
0.364407	0.338983	0.29661	0.238298	0.255319	0.221277	0.012712	0.237288	0.466102	0.711864	0.995763	0.008475	0.241525	0.516949	0.745763	0.978814	0.004237	0.254237	0.521186	0.775424	1	0.355932	0.237288	0.40678	0.085106	0.051064	0	0.004237	0.25	0.54661	0.851695	1	0.042373	0.275424	0.5	0.737288	0.966102	0.118644	0.216102	0.461864	0.648305	0.877119	0.533898	0.451064	0.021186	0.245763	0.512712	0.745763	0.970339	0.29661
0.312727	0.36	0.327273	0.255474	0.182482	0.237226	0.007273	0.2	0.527273	0.756364	0.989091	0.018182	0.247273	0.48	0.76	1	0.003636	0.236364	0.490909	0.712727	0.996364	0.352727	0.090909	0.556364	0.043796	0.10219	0	0.003636	0.134545	0.392727	0.778182	1	0.050909	0.796364	0.818182	0.861818	0.894545	0.014545	0.32	0.483636	0.658182	0.970909	0.494545	0.350365	0.014545	0.28	0.465455	0.669091	0.992727	0.356364
0.411765	0.285714	0.302521	0.271186	0.245763	0.169492	0.042017	0.252101	0.546218	0.697479	1	0.02521	0.243697	0.521008	0.789916	0.941176	0.008403	0.210084	0.420168	0.722689	0.983193	0.428571	0.243697	0.327731	0.084746	0.067797	0	0.008403	0.184874	0.462185	0.647059	1	0.243697	0.294118	0.394958	0.470588	0.554622	0.067227	0.134454	0.747899	0.865546	0.983193	0.411765	0.474576	0.05042	0.268908	0.478992	0.739496	0.97479	0.327731
0.337748	0.342715	0.319536	0.21393	0.217247	0.218905	0.006623	0.173841	0.483444	0.738411	0.993377	0.003311	0.256623	0.471854	0.753311	1	0.001656	0.311258	0.52649	0.75	0.998344	0.465232	0.157285	0.377483	0.058043	0.087894	0.004975	0.001656	0.149007	0.400662	0.642384	1	0.004967	0.39404	0.629139	0.726821	0.895695	0.062914	0.326159	0.562914	0.799669	0.996689	0.518212	0.361526	0.004967	0.307947	0.5	0.751656	0.998344	0.360927
0.32539	0.406049	0.268561	0.26055	0.16789	0.222018	0.001833	0.235564	0.489459	0.740605	1	0.003666	0.217232	0.468378	0.777269	0.999083	0.000917	0.313474	0.555454	0.730522	0.996334	0.569203	0.093492	0.337305	0.043119	0.081651	0.002752	0.000917	0.172319	0.394134	0.771769	1	0.021998	0.284143	0.385885	0.88451	0.996334	0.004583	0.497709	0.614115	0.735105	0.938588	0.509624	0.387156	0.006416	0.339138	0.560037	0.757104	0.996334	0.401467
0.457143	0.285714	0.257143	0.259615	0.192308	0.163462	0.019048	0.142857	0.428571	0.752381	1	0.028571	0.4	0.6	0.828571	0.990476	0.009524	0.238095	0.438095	0.685714	0.857143	0.714286	0.028571	0.257143	0.038462	0.038462	0	0.009524	0.171429	0.457143	0.819048	1	0.257143	0.257143	0.257143	0.266667	0.438095	0.314286	0.361905	0.571429	0.638095	0.704762	0.32381	0.384615	0.171429	0.342857	0.561905	0.695238	0.904762	0.295238
0.344086	0.392473	0.263441	0.286486	0.189189	0.205405	0.010753	0.241935	0.5	0.790323	0.994624	0.021505	0.172043	0.397849	0.704301	1	0.005376	0.349462	0.516129	0.698925	0.989247	0.580645	0.155914	0.263441	0.054054	0.064865	0.021622	0.005376	0.155914	0.317204	0.623656	1	0.096774	0.413978	0.645161	0.682796	0.967742	0.016129	0.456989	0.688172	0.752688	0.930108	0.403226	0.421622	0.016129	0.274194	0.456989	0.72043	0.951613	0.38172
0.327434	0.376106	0.29646	0.262222	0.213333	0.226667	0.00885	0.225664	0.469027	0.716814	1	0.013274	0.230088	0.495575	0.743363	0.995575	0.004425	0.265487	0.513274	0.747788	0.99115	0.464602	0.216814	0.318584	0.097778	0.08	0	0.004425	0.163717	0.393805	0.716814	1	0.088496	0.256637	0.49115	0.752212	0.973451	0.017699	0.371681	0.539823	0.787611	0.99115	0.460177	0.462222	0.017699	0.269912	0.495575	0.738938	0.973451	0.402655
0.423077	0.358974	0.217949	0.303226	0.154839	0.122581	0.012821	0.282051	0.589744	0.839744	1	0.019231	0.307692	0.608974	0.75641	0.99359	0.00641	0.134615	0.326923	0.474359	0.653846	0.512821	0.185897	0.301282	0.064516	0.090323	0.012903	0.00641	0.346154	0.717949	0.871795	1	0.025641	0.064103	0.307692	0.391026	0.583333	0.096154	0.160256	0.461538	0.557692	0.794872	0.339744	0.309677	0.025641	0.160256	0.365385	0.5	0.910256	0.397436
0.311258	0.397351	0.291391	0.246667	0.186667	0.26	0.039735	0.238411	0.463576	0.715232	1	0.013245	0.225166	0.523179	0.748344	0.986755	0.006623	0.245033	0.509934	0.721854	0.97351	0.490066	0.125828	0.384106	0.066667	0.093333	0	0.006623	0.139073	0.516556	0.774834	1	0.019868	0.311258	0.443709	0.622517	0.768212	0.18543	0.271523	0.503311	0.688742	0.92053	0.490066	0.4	0.033113	0.251656	0.509934	0.688742	0.960265	0.390728
0.351852	0.277778	0.37037	0.197026	0.256506	0.197026	0.011111	0.2	0.462963	0.677778	0.996296	0.007407	0.277778	0.618519	0.833333	0.988889	0.003704	0.240741	0.42963	0.711111	1	0.377778	0.148148	0.474074	0.052045	0.074349	0.01487	0.003704	0.240741	0.577778	0.759259	1	0.251852	0.533333	0.707407	0.774074	0.914815	0.051852	0.207407	0.362963	0.618519	0.988889	0.518519	0.386617	0.037037	0.277778	0.459259	0.748148	0.992593	0.296296
0.337748	0.374172	0.288079	0.232558	0.20598	0.182724	0.006623	0.198675	0.456954	0.682119	0.986755	0.016556	0.344371	0.569536	0.781457	1	0.003311	0.188742	0.433775	0.748344	0.996689	0.506623	0.298013	0.195364	0.112957	0.046512	0.019934	0.003311	0.254967	0.463576	0.735099	1	0.019868	0.288079	0.566225	0.745033	0.94702	0.049669	0.115894	0.400662	0.718543	0.996689	0.529801	0.385382	0.02649	0.334437	0.523179	0.778146	0.993377	0.354305
0.341818	0.298182	0.36	0.193078	0.271403	0.214936	0.003636	0.267273	0.512727	0.769091	1	0.012727	0.201818	0.445455	0.66	0.996364	0.001818	0.292727	0.529091	0.778182	0.992727	0.425455	0.085455	0.489091	0.041894	0.081967	0.001821	0.001818	0.256364	0.427273	0.650909	1	0.005455	0.214545	0.34	0.534545	0.612727	0.04	0.309091	0.643636	0.807273	0.996364	0.572727	0.404372	0.007273	0.232727	0.529091	0.730909	0.996364	0.336364
0.380952	0.306122	0.312925	0.19863	0.239726	0.191781	0.013605	0.340136	0.591837	0.829932	0.972789	0.054422	0.190476	0.401361	0.659864	1	0.006803	0.210884	0.469388	0.70068	0.952381	0.37415	0.312925	0.312925	0.089041	0.047945	0.034247	0.006803	0.251701	0.435374	0.659864	1	0.020408	0.163265	0.367347	0.707483	0.809524	0.027211	0.52381	0.612245	0.897959	0.979592	0.455782	0.369863	0.027211	0.210884	0.408163	0.680272	0.979592	0.272109
0.432668	0.329177	0.238155	0.27965	0.217228	0.147316	0.003741	0.235661	0.485037	0.761845	0.998753	0.002494	0.274314	0.493766	0.729426	0.997506	0.001247	0.244389	0.514963	0.778055	1	0.451372	0.01995	0.528678	0.012484	0.077403	0	0.001247	0.253117	0.445137	0.605985	1	0.498753	0.502494	0.612219	0.765586	0.84414	0.016209	0.233167	0.637157	0.865337	0.997506	0.361596	0.401998	0.007481	0.279302	0.528678	0.784289	0.995012	0.342893
0.310087	0.315068	0.374844	0.190773	0.269327	0.24813	0.002491	0.234122	0.486924	0.740971	1	0.004981	0.265255	0.499377	0.752179	0.996264	0.001245	0.250311	0.496887	0.742217	0.998755	0.466999	0.242839	0.290162	0.100998	0.05611	0.003741	0.001245	0.231631	0.460772	0.737235	1	0.038605	0.200498	0.420922	0.803238	0.998755	0.006227	0.32005	0.542964	0.703611	0.992528	0.570361	0.408978	0.003736	0.255293	0.473225	0.726027	0.998755	0.303861
0.383562	0.321918	0.294521	0.213793	0.255172	0.213793	0.013699	0.253425	0.589041	0.808219	0.986301	0.109589	0.280822	0.479452	0.719178	0.993151	0.006849	0.171233	0.376712	0.657534	1	0.575342	0.260274	0.164384	0.075862	0.062069	0.006897	0.006849	0.349315	0.547945	0.821918	1	0.09589	0.178082	0.280822	0.561644	0.657534	0.020548	0.054795	0.458904	0.719178	0.90411	0.417808	0.413793	0.020548	0.246575	0.431507	0.616438	0.931507	0.356164
0.333333	0.312684	0.353982	0.213018	0.236686	0.224852	0.00885	0.250737	0.533923	0.781711	0.99705	0.0059	0.185841	0.386431	0.646018	0.99115	0.00295	0.300885	0.501475	0.761062	1	0.39233	0.19469	0.412979	0.065089	0.076923	0	0.00295	0.218289	0.427729	0.654867	1	0.156342	0.286136	0.489676	0.79941	0.952802	0.011799	0.215339	0.536873	0.831858	0.99115	0.542773	0.343195	0.00885	0.256637	0.486726	0.731563	0.9941	0.330383
0.350482	0.379421	0.270096	0.267311	0.170692	0.219002	0.009646	0.220257	0.504823	0.78135	0.998392	0.003215	0.263666	0.493569	0.721865	0.977492	0.001608	0.249196	0.490354	0.734727	1	0.530547	0.162379	0.307074	0.062802	0.062802	0.00161	0.001608	0.226688	0.501608	0.721865	1	0.049839	0.28135	0.469453	0.553055	0.871383	0.028939	0.250804	0.564309	0.836013	0.996785	0.437299	0.347826	0.004823	0.245981	0.469453	0.70418	0.993569	0.419614
0.344	0.344	0.312	0.217742	0.25	0.217742	0.016	0.168	0.4	0.712	0.992	0.024	0.296	0.472	0.72	0.976	0.008	0.216	0.512	0.792	1	0.312	0.208	0.48	0.080645	0.080645	0	0.008	0.232	0.472	0.816	1	0.248	0.288	0.368	0.448	0.856	0.032	0.16	0.592	0.712	0.96	0.472	0.306452	0.032	0.32	0.48	0.784	0.984	0.392
0.374813	0.388306	0.236882	0.288288	0.160661	0.171171	0.002999	0.209895	0.469265	0.73913	1	0.011994	0.266867	0.518741	0.770615	0.995502	0.001499	0.311844	0.547226	0.731634	0.997001	0.544228	0.127436	0.328336	0.046547	0.073574	0.007508	0.001499	0.151424	0.389805	0.767616	1	0.227886	0.457271	0.572714	0.709145	0.826087	0.004498	0.362819	0.56072	0.737631	0.98051	0.481259	0.327327	0.004498	0.310345	0.491754	0.667166	0.986507	0.433283
0.352448	0.334266	0.313287	0.22549	0.232493	0.214286	0.002797	0.278322	0.535664	0.777622	1	0.004196	0.205594	0.448951	0.696503	0.994406	0.001399	0.272727	0.527273	0.759441	0.998601	0.373427	0.19021	0.436364	0.095238	0.072829	0.005602	0.001399	0.254545	0.507692	0.8	1	0.012587	0.193007	0.441958	0.881119	0.998601	0.034965	0.286713	0.531469	0.683916	0.93007	0.525874	0.386555	0.013986	0.26993	0.48951	0.724476	0.998601	0.352448
0.433333	0.288889	0.277778	0.258427	0.247191	0.168539	0.033333	0.244444	0.5	0.777778	1	0.022222	0.155556	0.444444	0.622222	0.988889	0.011111	0.222222	0.433333	0.688889	0.955556	0.177778	0	0.822222	0	0.067416	0	0.011111	0.044444	0.711111	0.755556	1	0	0	0	0	0	0.055556	0.244444	0.488889	0.688889	0.977778	0.322222	0.426966	0.077778	0.355556	0.555556	0.688889	0.955556	0.266667
0.320819	0.34471	0.334471	0.232877	0.191781	0.236301	0.013652	0.262799	0.467577	0.764505	0.996587	0.006826	0.194539	0.501706	0.706485	1	0.003413	0.245734	0.508532	0.771331	0.986348	0.443686	0.276451	0.279863	0.10274	0.054795	0.006849	0.003413	0.150171	0.406143	0.607509	1	0.010239	0.194539	0.307167	0.505119	0.699659	0.051195	0.744027	0.825939	0.914676	0.989761	0.566553	0.369863	0.006826	0.262799	0.498294	0.737201	0.982935	0.354949
0.366372	0.339823	0.293805	0.239362	0.214539	0.214539	0.00354	0.235398	0.490265	0.752212	0.99823	0.00708	0.233628	0.513274	0.778761	0.984071	0.00177	0.258407	0.474336	0.722124	1	0.559292	0.152212	0.288496	0.069149	0.072695	0.001773	0.00177	0.2	0.488496	0.677876	1	0.042478	0.210619	0.428319	0.555752	0.929204	0.017699	0.325664	0.693805	0.780531	0.99292	0.442478	0.397163	0.00708	0.261947	0.467257	0.713274	0.99115	0.362832
0.382022	0.393258	0.224719	0.295455	0.181818	0.181818	0.033708	0.146067	0.359551	0.640449	0.966292	0.022472	0.280899	0.483146	0.685393	0.988764	0.011236	0.404494	0.696629	0.797753	1	0.348315	0.033708	0.617978	0.022727	0.090909	0	0.011236	0.483146	0.606742	0.876404	1	0.94382	0.94382	0.94382	0.955056	0.966292	0.033708	0.168539	0.325843	0.674157	0.865169	0.348315	0.409091	0.146067	0.303371	0.651685	0.786517	0.94382	0.359551
0.353659	0.292683	0.353659	0.197531	0.246914	0.222222	0.060976	0.256098	0.414634	0.621951	0.95122	0.02439	0.158537	0.634146	0.841463	0.97561	0.012195	0.195122	0.439024	0.682927	1	0.378049	0.292683	0.329268	0.098765	0.074074	0	0.012195	0.121951	0.54878	0.829268	1	0.036585	0.280488	0.597561	0.731707	0.804878	0.134146	0.195122	0.426829	0.512195	0.939024	0.426829	0.493827	0.036585	0.170732	0.463415	0.646341	0.963415	0.292683
0.391198	0.410758	0.198044	0.316176	0.169118	0.139706	0.012225	0.315403	0.552567	0.819071	0.997555	0.00489	0.210269	0.425428	0.682152	0.99022	0.002445	0.259169	0.542787	0.728606	1	0.748166	0.09291	0.158924	0.036765	0.061275	0.007353	0.002445	0.217604	0.440098	0.753056	1	0.03912	0.276284	0.584352	0.731051	0.973105	0.09291	0.486553	0.625917	0.772616	0.93643	0.352078	0.303922	0.03423	0.227384	0.381418	0.674817	0.987775	0.471883
0.453634	0.310777	0.235589	0.271357	0.201005	0.150754	0.010025	0.275689	0.516291	0.769424	0.994987	0.005013	0.172932	0.403509	0.724311	0.987469	0.002506	0.295739	0.546366	0.744361	1	0.536341	0.037594	0.426065	0.022613	0.082915	0.002513	0.002506	0.150376	0.365915	0.558897	1	0.152882	0.157895	0.699248	0.949875	0.974937	0.007519	0.398496	0.654135	0.814536	0.969925	0.37594	0.38191	0.007519	0.303258	0.528822	0.719298	0.992481	0.35589
0.49115	0.314159	0.19469	0.263858	0.146341	0.144124	0.00885	0.387168	0.659292	0.80531	1	0.004425	0.227876	0.415929	0.630531	0.997788	0.002212	0.152655	0.311947	0.480088	0.993363	0.679204	0.141593	0.179204	0.042129	0.064302	0.002217	0.002212	0.334071	0.637168	0.807522	1	0.013274	0.121681	0.188053	0.455752	0.993363	0.050885	0.15708	0.307522	0.411504	0.942478	0.314159	0.252772	0.019912	0.154867	0.263274	0.418142	0.995575	0.387168
0.296748	0.52439	0.178862	0.310204	0.126531	0.155102	0.01626	0.321138	0.528455	0.756098	1	0.00813	0.191057	0.504065	0.764228	0.987805	0.004065	0.296748	0.443089	0.601626	0.995935	0.833333	0.146341	0.020325	0.061224	0.012245	0.004082	0.004065	0.207317	0.544715	0.780488	1	0.276423	0.333333	0.443089	0.5	0.926829	0.268293	0.268293	0.272358	0.609756	0.617886	0.654472	0.253061	0.00813	0.166667	0.386179	0.752033	0.995935	0.556911
0.393939	0.328671	0.277389	0.268692	0.214953	0.221963	0.009324	0.291375	0.592075	0.801865	1	0.004662	0.184149	0.389277	0.636364	0.995338	0.002331	0.263403	0.501166	0.703963	0.97669	0.666667	0.086247	0.247086	0.10514	0.095794	0.016355	0.002331	0.25641	0.51049	0.752914	1	0.011655	0.18648	0.400932	0.699301	0.941725	0.027972	0.27972	0.4662	0.69697	0.969697	0.305361	0.504673	0.013986	0.270396	0.501166	0.724942	0.962704	0.324009
0.359375	0.317708	0.322917	0.230366	0.209424	0.26178	0.020833	0.244792	0.46875	0.755208	0.963542	0.010417	0.229167	0.489583	0.703125	0.989583	0.005208	0.25	0.510417	0.75	1	0.46875	0.208333	0.322917	0.109948	0.057592	0.005236	0.005208	0.317708	0.567708	0.713542	1	0.161458	0.338542	0.463542	0.755208	0.994792	0.015625	0.109375	0.307292	0.822917	0.96875	0.484375	0.460733	0.026042	0.270833	0.505208	0.734375	0.994792	0.307292
0.385185	0.377778	0.237037	0.276119	0.208955	0.216418	0.044444	0.281481	0.511111	0.8	1	0.02963	0.237037	0.4	0.711111	0.985185	0.007407	0.155556	0.577778	0.762963	0.955556	0.674074	0.17037	0.155556	0.052239	0.067164	0.022388	0.007407	0.2	0.37037	0.651852	1	0.022222	0.555556	0.822222	0.888889	0.933333	0.037037	0.459259	0.622222	0.718519	0.97037	0.377778	0.41791	0.022222	0.377778	0.474074	0.718519	0.985185	0.355556
0.4	0.333333	0.266667	0.244094	0.228346	0.216535	0.011765	0.278431	0.47451	0.709804	0.988235	0.007843	0.223529	0.478431	0.760784	1	0.003922	0.262745	0.537255	0.780392	0.996078	0.396078	0.223529	0.380392	0.070866	0.055118	0	0.003922	0.231373	0.454902	0.792157	1	0.039216	0.270588	0.352941	0.772549	0.992157	0.109804	0.2	0.529412	0.698039	0.882353	0.501961	0.425197	0.019608	0.243137	0.537255	0.784314	0.976471	0.286275
0.347165	0.417704	0.235131	0.270083	0.171745	0.17867	0.008299	0.261411	0.547718	0.775934	1	0.011065	0.26971	0.525588	0.757953	0.998617	0.001383	0.211618	0.392808	0.69018	0.991701	0.759336	0.107884	0.13278	0.044321	0.044321	0.00277	0.001383	0.304288	0.550484	0.780083	1	0.002766	0.215768	0.319502	0.576763	0.858921	0.058091	0.192254	0.298755	0.687414	0.959889	0.392808	0.357341	0.002766	0.211618	0.417704	0.596127	0.97787	0.42462
0.442987	0.368315	0.188698	0.253535	0.162626	0.145455	0.003027	0.268416	0.557013	0.734612	0.998991	0.002018	0.259334	0.473259	0.823411	1	0.001009	0.191726	0.457114	0.716448	0.995964	0.610494	0.075681	0.313824	0.038384	0.050505	0.00202	0.001009	0.236125	0.45005	0.836529	1	0.029263	0.195762	0.487386	0.617558	0.9667	0.025227	0.265388	0.645812	0.724521	0.925328	0.313824	0.236364	0.013118	0.19778	0.502523	0.913219	0.996973	0.401615
0.422018	0.357798	0.220183	0.285714	0.142857	0.193548	0.041284	0.362385	0.619266	0.802752	1	0.009174	0.183486	0.481651	0.752294	0.995413	0.004587	0.169725	0.325688	0.550459	0.990826	0.555046	0.197248	0.247706	0.078341	0.059908	0.004608	0.004587	0.270642	0.522936	0.711009	1	0.050459	0.188073	0.348624	0.536697	0.963303	0.105505	0.288991	0.619266	0.779817	0.986239	0.311927	0.359447	0.03211	0.192661	0.348624	0.674312	0.963303	0.385321
0.386831	0.308642	0.304527	0.235537	0.210744	0.202479	0.012346	0.213992	0.481481	0.72428	0.99177	0.00823	0.246914	0.563786	0.798354	0.995885	0.004115	0.263374	0.45679	0.716049	1	0.329218	0.082305	0.588477	0.033058	0.107438	0	0.004115	0.176955	0.44856	0.794239	1	0.45679	0.781893	0.835391	0.855967	0.884774	0.041152	0.26749	0.473251	0.63786	0.975309	0.485597	0.347107	0.045267	0.259259	0.45679	0.654321	0.971193	0.325103
0.376825	0.415146	0.208029	0.308676	0.174429	0.155251	0.00365	0.247263	0.512774	0.741788	1	0.001825	0.20073	0.471715	0.738139	0.999088	0.000912	0.355839	0.541971	0.788321	0.998175	0.740876	0.059307	0.199818	0.03653	0.051142	0.003653	0.000912	0.215328	0.458942	0.698905	1	0.02281	0.399635	0.455292	0.643248	0.946168	0.010949	0.414234	0.809307	0.868613	0.933394	0.362226	0.336073	0.004562	0.32573	0.559307	0.788321	0.998175	0.423358
0.403226	0.306452	0.290323	0.227642	0.211382	0.195122	0.024194	0.16129	0.427419	0.701613	0.991935	0.016129	0.233871	0.540323	0.741935	0.975806	0.008065	0.258065	0.556452	0.782258	1	0.274194	0	0.725806	0	0.081301	0	0.008065	0.177419	0.596774	0.741935	1	0	0	0	0	0	0.064516	0.290323	0.475806	0.709677	0.959677	0.427419	0.471545	0.032258	0.322581	0.524194	0.75	0.967742	0.25
0.451282	0.317949	0.230769	0.319588	0.170103	0.154639	0.010256	0.312821	0.6	0.789744	1	0.015385	0.271795	0.502564	0.758974	0.989744	0.005128	0.184615	0.34359	0.512821	0.979487	0.74359	0.158974	0.097436	0.072165	0.051546	0.010309	0.005128	0.297436	0.6	0.805128	1	0.148718	0.220513	0.353846	0.420513	0.851282	0.05641	0.071795	0.138462	0.569231	0.641026	0.34359	0.268041	0.020513	0.169231	0.312821	0.507692	0.897436	0.374359
0.409449	0.259843	0.330709	0.209486	0.300395	0.16996	0.007874	0.30315	0.480315	0.80315	1	0.019685	0.181102	0.523622	0.700787	0.952756	0.003937	0.244094	0.5	0.724409	0.988189	0.275591	0.279528	0.444882	0.071146	0.063241	0.007905	0.003937	0.133858	0.448819	0.728346	1	0.047244	0.122047	0.299213	0.807087	0.996063	0.169291	0.401575	0.531496	0.748031	0.96063	0.472441	0.474308	0.023622	0.244094	0.515748	0.744094	0.988189	0.26378
0.44	0.261818	0.298182	0.229927	0.226277	0.171533	0.018182	0.152727	0.370909	0.694545	1	0.007273	0.367273	0.534545	0.781818	0.945455	0.003636	0.345455	0.538182	0.745455	0.985455	0.407273	0.109091	0.483636	0.069343	0.054745	0.00365	0.003636	0.370909	0.64	0.829091	1	0.283636	0.36	0.538182	0.654545	0.927273	0.032727	0.149091	0.403636	0.596364	0.992727	0.421818	0.386861	0.014545	0.396364	0.549091	0.741818	0.996364	0.298182
0.372881	0.355932	0.271186	0.264957	0.273504	0.145299	0.025424	0.220339	0.491525	0.711864	1	0.042373	0.305085	0.533898	0.855932	0.991525	0.008475	0.169492	0.372881	0.644068	0.915254	0.389831	0.262712	0.347458	0.068376	0.08547	0.017094	0.008475	0.29661	0.576271	0.847458	1	0.042373	0.09322	0.415254	0.533898	0.788136	0.144068	0.220339	0.601695	0.711864	0.974576	0.440678	0.410256	0.016949	0.194915	0.432203	0.644068	0.889831	0.381356
0.337553	0.383966	0.278481	0.258475	0.20339	0.233051	0.008439	0.189873	0.50211	0.78481	1	0.016878	0.257384	0.523207	0.772152	0.995781	0.004219	0.261603	0.485232	0.666667	0.915612	0.493671	0.308017	0.198312	0.097458	0.072034	0.012712	0.004219	0.312236	0.594937	0.805907	1	0.088608	0.257384	0.362869	0.518987	0.919831	0.033755	0.160338	0.544304	0.818565	0.924051	0.400844	0.389831	0.042194	0.227848	0.413502	0.620253	0.932489	0.42616
0.346154	0.380342	0.273504	0.257511	0.141631	0.214592	0.012821	0.264957	0.5	0.773504	1	0.008547	0.209402	0.482906	0.717949	0.987179	0.004274	0.25641	0.504274	0.752137	0.978632	0.487179	0.376068	0.136752	0.137339	0.034335	0	0.004274	0.149573	0.542735	0.777778	1	0.094017	0.418803	0.581197	0.803419	0.961538	0.017094	0.166667	0.200855	0.24359	0.487179	0.521368	0.351931	0.017094	0.277778	0.517094	0.752137	0.965812	0.405983
0.438326	0.356828	0.204846	0.324503	0.183223	0.134658	0.006608	0.185022	0.453744	0.720264	0.997797	0.004405	0.251101	0.45815	0.737885	0.993392	0.002203	0.414097	0.610132	0.810573	1	0.464758	0.218062	0.317181	0.081678	0.081678	0.002208	0.002203	0.207048	0.440529	0.740088	1	0.048458	0.286344	0.513216	0.73348	0.991189	0.008811	0.253304	0.537445	0.757709	0.993392	0.433921	0.322296	0.008811	0.244493	0.484581	0.73348	0.993392	0.400881
0.344749	0.424658	0.230594	0.279176	0.173913	0.196796	0.004566	0.30137	0.570776	0.787671	0.997717	0.006849	0.194064	0.388128	0.728311	0.993151	0.002283	0.351598	0.538813	0.703196	1	0.671233	0.041096	0.287671	0.02746	0.050343	0	0.002283	0.187215	0.356164	0.753425	1	0.041096	0.047945	0.860731	0.869863	0.965753	0.009132	0.525114	0.614155	0.728311	0.90411	0.390411	0.356979	0.013699	0.26484	0.497717	0.684932	0.984018	0.383562
0.264516	0.44086	0.294624	0.226293	0.170259	0.232759	0.004301	0.189247	0.462366	0.707527	0.997849	0.006452	0.301075	0.554839	0.782796	1	0.002151	0.206452	0.423656	0.675269	0.995699	0.44086	0.189247	0.369892	0.068966	0.073276	0.00431	0.002151	0.286022	0.509677	0.767742	1	0.12043	0.266667	0.623656	0.756989	0.929032	0.025806	0.204301	0.430108	0.696774	0.989247	0.544086	0.396552	0.008602	0.27957	0.51828	0.733333	0.995699	0.44086
0.340278	0.399306	0.260417	0.273043	0.144348	0.203478	0.005208	0.199653	0.418403	0.708333	0.994792	0.006944	0.248264	0.522569	0.743056	0.996528	0.001736	0.309028	0.567708	0.776042	1	0.539931	0.125	0.335069	0.048696	0.086957	0.003478	0.001736	0.164931	0.34375	0.637153	1	0.236111	0.571181	0.696181	0.871528	0.960069	0.005208	0.380208	0.588542	0.791667	0.991319	0.520833	0.365217	0.008681	0.322917	0.538194	0.743056	0.986111	0.432292
0.371698	0.398113	0.230189	0.272899	0.15864	0.169027	0.003774	0.185849	0.551887	0.791509	1	0.007547	0.281132	0.44717	0.699057	0.99717	0.000943	0.279245	0.523585	0.754717	0.998113	0.674528	0.075472	0.25	0.036827	0.051936	0.002833	0.000943	0.239623	0.435849	0.685849	1	0.204717	0.50566	0.59717	0.733962	0.968868	0.00566	0.128302	0.662264	0.816981	0.993396	0.39717	0.381492	0.00566	0.285849	0.479245	0.703774	0.998113	0.4
0.344828	0.349754	0.305419	0.252475	0.207921	0.232673	0.014778	0.270936	0.507389	0.729064	1	0.009852	0.17734	0.423645	0.773399	0.995074	0.004926	0.295567	0.477833	0.694581	0.901478	0.408867	0.428571	0.162562	0.133663	0.054455	0.00495	0.004926	0.275862	0.566502	0.802956	1	0.019704	0.315271	0.472906	0.655172	0.901478	0.083744	0.118227	0.261084	0.935961	0.985222	0.453202	0.445545	0.019704	0.251232	0.463054	0.694581	0.906404	0.344828
0.346908	0.315234	0.337858	0.21148	0.238671	0.234139	0.003017	0.269985	0.552036	0.775264	0.996983	0.004525	0.199095	0.434389	0.707391	1	0.001508	0.28356	0.514329	0.745098	0.998492	0.411765	0.162896	0.425339	0.070997	0.070997	0.004532	0.001508	0.26546	0.496229	0.822021	1	0.003017	0.182504	0.377074	0.886878	0.998492	0.027149	0.248869	0.527903	0.671192	0.924585	0.544495	0.392749	0.004525	0.250377	0.475113	0.711916	0.998492	0.33635
0.33	0.31	0.36	0.262626	0.252525	0.222222	0.07	0.26	0.55	0.81	1	0.03	0.17	0.38	0.71	0.98	0.01	0.27	0.49	0.7	0.97	0.4	0.34	0.26	0.090909	0.050505	0.010101	0.01	0.16	0.38	0.61	1	0.09	0.41	0.54	0.68	0.96	0.19	0.24	0.73	0.79	0.89	0.46	0.464646	0.04	0.19	0.53	0.71	0.95	0.32
0.428571	0.404762	0.166667	0.361446	0.180723	0.120482	0.02381	0.345238	0.630952	0.845238	1	0.035714	0.22619	0.416667	0.642857	0.97619	0.011905	0.142857	0.333333	0.607143	0.797619	0.630952	0.261905	0.107143	0.120482	0.024096	0	0.011905	0.22619	0.511905	0.833333	1	0.130952	0.178571	0.297619	0.428571	0.619048	0.678571	0.690476	0.714286	0.738095	0.77381	0.333333	0.361446	0.059524	0.261905	0.452381	0.547619	0.77381	0.464286
0.294698	0.40074	0.304562	0.253086	0.164198	0.244444	0.003699	0.268804	0.521578	0.734895	0.995068	0.002466	0.22688	0.491985	0.745993	1	0.001233	0.250308	0.489519	0.763255	0.998767	0.442663	0.187423	0.369914	0.080247	0.07284	0.003704	0.001233	0.297164	0.532676	0.786683	1	0.003699	0.173859	0.414303	0.875462	0.991369	0.023428	0.241677	0.484587	0.614057	0.95561	0.520345	0.402469	0.004932	0.244143	0.452528	0.691739	0.996301	0.418002
0.335165	0.412088	0.252747	0.331492	0.165746	0.20442	0.027473	0.192308	0.423077	0.664835	0.994505	0.016484	0.291209	0.587912	0.840659	1	0.005495	0.225275	0.456044	0.631868	0.989011	0.587912	0.175824	0.236264	0.077348	0.044199	0	0.005495	0.208791	0.483516	0.807692	1	0.043956	0.357143	0.516484	0.576923	0.747253	0.17033	0.258242	0.318681	0.67033	0.912088	0.423077	0.375691	0.049451	0.258242	0.412088	0.593407	0.972527	0.417582
0.312925	0.37415	0.312925	0.225256	0.204778	0.242321	0.010204	0.190476	0.5	0.744898	0.996599	0.006803	0.285714	0.486395	0.734694	1	0.003401	0.231293	0.537415	0.765306	0.993197	0.452381	0.238095	0.309524	0.088737	0.081911	0.013652	0.003401	0.227891	0.455782	0.693878	1	0.030612	0.210884	0.380952	0.489796	0.996599	0.085034	0.323129	0.690476	0.880952	0.972789	0.527211	0.354949	0.034014	0.309524	0.486395	0.714286	0.989796	0.391156
0.349206	0.392416	0.258377	0.269197	0.172992	0.203883	0.002646	0.250441	0.516755	0.77866	1	0.001764	0.22134	0.492063	0.76455	0.998236	0.000882	0.263668	0.477072	0.687831	0.989418	0.600529	0.13933	0.260141	0.067961	0.064431	0.004413	0.000882	0.208995	0.511464	0.75485	1	0.034392	0.382716	0.529982	0.708995	0.935626	0.008818	0.236332	0.371252	0.783069	0.989418	0.492945	0.372462	0.008818	0.203704	0.442681	0.671958	0.992945	0.385362
0.349034	0.30314	0.347826	0.200726	0.243047	0.229746	0.002415	0.248792	0.486715	0.7343	1	0.003623	0.258454	0.492754	0.745169	0.992754	0.001208	0.227053	0.503623	0.76087	0.998792	0.477053	0.2343	0.288647	0.099154	0.053204	0.002418	0.001208	0.204106	0.431159	0.733092	1	0.043478	0.205314	0.443237	0.806763	0.998792	0.013285	0.352657	0.561594	0.724638	0.992754	0.561594	0.406288	0.004831	0.256039	0.481884	0.742754	0.998792	0.31401
0.366667	0.406667	0.226667	0.255034	0.187919	0.187919	0.02	0.14	0.38	0.72	0.993333	0.013333	0.373333	0.553333	0.74	0.966667	0.006667	0.246667	0.42	0.713333	1	0.533333	0.273333	0.193333	0.107383	0.040268	0	0.006667	0.16	0.46	0.753333	1	0.026667	0.28	0.366667	0.693333	0.886667	0.146667	0.566667	0.613333	0.766667	0.82	0.44	0.348993	0.026667	0.34	0.533333	0.726667	0.946667	0.413333
0.432161	0.316583	0.251256	0.257576	0.212121	0.19697	0.01005	0.261307	0.542714	0.809045	1	0.055276	0.246231	0.462312	0.723618	0.98995	0.005025	0.18593	0.447236	0.633166	0.964824	0.386935	0.236181	0.376884	0.10101	0.070707	0.010101	0.005025	0.170854	0.557789	0.834171	1	0.01005	0.180905	0.457286	0.658291	0.733668	0.045226	0.266332	0.361809	0.773869	0.959799	0.351759	0.414141	0.015075	0.19598	0.467337	0.658291	0.964824	0.321608
0.34375	0.320312	0.335938	0.267717	0.188976	0.251969	0.023438	0.242188	0.460938	0.757812	0.976562	0.015625	0.148438	0.445312	0.703125	0.953125	0.007812	0.273438	0.539062	0.773438	1	0.390625	0.140625	0.46875	0.07874	0.110236	0	0.007812	0.101562	0.476562	0.726562	1	0.273438	0.414062	0.625	0.789062	0.835938	0.03125	0.226562	0.5	0.867188	0.984375	0.523438	0.425197	0.046875	0.335938	0.53125	0.742188	0.984375	0.351562
0.447761	0.223881	0.328358	0.203008	0.240602	0.157895	0.052239	0.298507	0.514925	0.828358	1	0.044776	0.201493	0.5	0.671642	0.977612	0.007463	0.231343	0.447761	0.69403	0.985075	0.335821	0.171642	0.492537	0.075188	0.090226	0	0.007463	0.216418	0.470149	0.731343	1	0.022388	0.238806	0.432836	0.656716	0.716418	0.052239	0.298507	0.529851	0.80597	0.985075	0.38806	0.421053	0.029851	0.253731	0.522388	0.69403	0.977612	0.216418
0.41637	0.238434	0.345196	0.157143	0.307143	0.167857	0.032028	0.270463	0.505338	0.768683	0.989324	0.014235	0.231317	0.491103	0.718861	1	0.003559	0.234875	0.483986	0.711744	0.985765	0.3879	0.188612	0.423488	0.057143	0.078571	0	0.003559	0.19573	0.434164	0.704626	1	0.007117	0.295374	0.441281	0.644128	0.740214	0.053381	0.256228	0.537367	0.83274	0.992883	0.55516	0.414286	0.007117	0.245552	0.476868	0.66548	0.985765	0.224199
0.464072	0.302395	0.233533	0.267267	0.225225	0.147147	0.01497	0.230539	0.508982	0.772455	0.994012	0.005988	0.242515	0.461078	0.679641	0.961078	0.002994	0.275449	0.535928	0.733533	1	0.443114	0.062874	0.494012	0.03003	0.09009	0	0.002994	0.200599	0.398204	0.661677	1	0.131737	0.143713	0.377246	0.458084	0.54491	0.008982	0.335329	0.628743	0.766467	0.997006	0.299401	0.318318	0.011976	0.371257	0.538922	0.679641	0.997006	0.314371
0.415385	0.292308	0.292308	0.248062	0.286822	0.20155	0.030769	0.223077	0.476923	0.738462	1	0.023077	0.230769	0.538462	0.746154	0.992308	0.007692	0.238462	0.484615	0.676923	0.915385	0.484615	0.238462	0.276923	0.077519	0.062016	0	0.007692	0.123077	0.407692	0.738462	1	0.146154	0.192308	0.507692	0.861538	0.923077	0.084615	0.346154	0.661538	0.730769	0.815385	0.361538	0.372093	0.161538	0.315385	0.561538	0.715385	0.915385	0.269231
0.383356	0.326057	0.290587	0.25	0.229508	0.173497	0.005457	0.236016	0.523874	0.793997	1	0.002729	0.249659	0.492497	0.731241	0.995907	0.001364	0.255116	0.457026	0.698499	0.997271	0.480218	0.060027	0.459754	0.02459	0.095628	0.010929	0.001364	0.244202	0.476126	0.806276	1	0.155525	0.321965	0.357435	0.854025	0.897681	0.00955	0.229195	0.515689	0.695771	0.986357	0.432469	0.423497	0.008186	0.276944	0.435198	0.658936	0.994543	0.342428
0.293907	0.46595	0.240143	0.240575	0.16158	0.149013	0.005376	0.277778	0.491039	0.783154	0.994624	0.008961	0.218638	0.507168	0.700717	1	0.001792	0.286738	0.464158	0.756272	0.987455	0.648746	0.200717	0.150538	0.071813	0.039497	0	0.001792	0.240143	0.505376	0.741935	1	0.005376	0.247312	0.417563	0.752688	0.987455	0.150538	0.318996	0.59319	0.731183	0.951613	0.546595	0.330341	0.003584	0.295699	0.528674	0.700717	0.991039	0.453405
0.376682	0.32287	0.300448	0.265766	0.202703	0.198198	0.013453	0.215247	0.538117	0.834081	0.986547	0.040359	0.269058	0.529148	0.735426	1	0.004484	0.197309	0.430493	0.672646	0.946188	0.816143	0.06278	0.121076	0.036036	0.063063	0.018018	0.004484	0.273543	0.524664	0.744395	1	0.03139	0.071749	0.313901	0.457399	0.946188	0.026906	0.112108	0.327354	0.901345	0.982063	0.327354	0.432432	0.017937	0.224215	0.443946	0.64574	0.955157	0.376682
0.302521	0.436975	0.260504	0.254237	0.161017	0.20339	0.042017	0.184874	0.554622	0.865546	1	0.02521	0.268908	0.428571	0.722689	0.932773	0.008403	0.252101	0.487395	0.689076	0.966387	0.436975	0.151261	0.411765	0.050847	0.084746	0	0.008403	0.193277	0.352941	0.714286	1	0.243697	0.268908	0.436975	0.731092	0.773109	0.033613	0.487395	0.596639	0.857143	0.966387	0.453782	0.355932	0.067227	0.394958	0.537815	0.739496	0.966387	0.411765
0.22449	0.462585	0.312925	0.205479	0.136986	0.287671	0.034014	0.217687	0.346939	0.496599	0.986395	0.013605	0.367347	0.659864	0.85034	0.993197	0.006803	0.197279	0.442177	0.612245	1	0.632653	0.312925	0.054422	0.061644	0.020548	0.006849	0.006803	0.37415	0.680272	0.836735	1	0.088435	0.183673	0.29932	0.44898	0.557823	0.020408	0.027211	0.040816	0.489796	0.503401	0.612245	0.315068	0.040816	0.251701	0.52381	0.727891	0.979592	0.462585
0.214575	0.578947	0.206478	0.176471	0.097363	0.237323	0.022267	0.244939	0.38664	0.744939	1	0.004049	0.259109	0.552632	0.751012	0.995951	0.002024	0.226721	0.47166	0.734818	0.993927	0.789474	0.032389	0.178138	0.016227	0.060852	0	0.002024	0.222672	0.47166	0.710526	1	0.008097	0.01417	0.433198	0.98583	0.993927	0.022267	0.396761	0.672065	0.765182	0.809717	0.451417	0.332657	0.010121	0.200405	0.508097	0.704453	0.993927	0.595142
0.349515	0.378641	0.271845	0.343137	0.127451	0.254902	0.029126	0.300971	0.543689	0.728155	0.990291	0.019417	0.213592	0.524272	0.834951	1	0.009709	0.165049	0.398058	0.592233	0.883495	0.446602	0.349515	0.203883	0.137255	0.039216	0	0.009709	0.281553	0.660194	0.854369	1	0.038835	0.271845	0.543689	0.76699	0.902913	0.116505	0.15534	0.330097	0.378641	0.436893	0.368932	0.352941	0.038835	0.174757	0.436893	0.757282	0.912621	0.398058
0.349057	0.292453	0.358491	0.208531	0.265403	0.175355	0.009434	0.259434	0.490566	0.698113	0.990566	0.075472	0.254717	0.419811	0.712264	1	0.004717	0.193396	0.599057	0.79717	0.995283	0.533019	0.150943	0.316038	0.075829	0.066351	0	0.004717	0.278302	0.410377	0.650943	1	0.018868	0.051887	0.599057	0.75	0.938679	0.117925	0.216981	0.570755	0.806604	0.995283	0.514151	0.388626	0.014151	0.325472	0.533019	0.754717	0.995283	0.320755
0.336788	0.357513	0.305699	0.270833	0.25	0.223958	0.015544	0.202073	0.476684	0.746114	0.994819	0.010363	0.243523	0.466321	0.725389	1	0.005181	0.274611	0.497409	0.735751	0.927461	0.440415	0.450777	0.108808	0.125	0.03125	0	0.005181	0.238342	0.590674	0.839378	1	0.020725	0.331606	0.497409	0.678756	0.932642	0.093264	0.11399	0.248705	0.274611	0.715026	0.440415	0.479167	0.025907	0.274611	0.476684	0.704663	0.937824	0.378238
0.309859	0.330986	0.359155	0.212766	0.241135	0.269504	0.042254	0.274648	0.471831	0.676056	0.957746	0.021127	0.197183	0.5	0.774648	0.985915	0.007042	0.253521	0.492958	0.760563	1	0.408451	0.309859	0.28169	0.148936	0.06383	0.007092	0.007042	0.211268	0.549296	0.704225	1	0.225352	0.471831	0.619718	0.830986	0.992958	0.06338	0.147887	0.28169	0.352113	0.922535	0.464789	0.411348	0.014085	0.253521	0.521127	0.795775	0.992958	0.323944
0.328704	0.351852	0.319444	0.176744	0.255814	0.213953	0.018519	0.259259	0.453704	0.722222	1	0.009259	0.171296	0.578704	0.796296	0.990741	0.00463	0.277778	0.458333	0.666667	0.986111	0.472222	0.407407	0.12037	0.111628	0.037209	0	0.00463	0.273148	0.564815	0.824074	1	0.023148	0.310185	0.481481	0.634259	0.861111	0.087963	0.111111	0.240741	0.657407	0.921296	0.425926	0.465116	0.027778	0.25463	0.453704	0.685185	0.986111	0.425926
0.353535	0.252525	0.393939	0.163265	0.295918	0.163265	0.040404	0.252525	0.535354	0.767677	1	0.020202	0.191919	0.454545	0.717172	0.919192	0.010101	0.232323	0.474747	0.626263	0.979798	0.414141	0.30303	0.282828	0.122449	0.061224	0	0.010101	0.262626	0.636364	0.787879	1	0.282828	0.535354	0.616162	0.818182	0.949495	0.040404	0.10101	0.232323	0.434343	0.505051	0.373737	0.428571	0.060606	0.191919	0.454545	0.606061	0.949495	0.222222
0.451505	0.337793	0.210702	0.278523	0.194631	0.157718	0.006689	0.274247	0.565217	0.755853	1	0.013378	0.267559	0.458194	0.719064	0.996656	0.003344	0.16388	0.337793	0.829431	0.986622	0.618729	0.207358	0.173913	0.080537	0.053691	0.006711	0.003344	0.280936	0.518395	0.688963	1	0.060201	0.150502	0.26087	0.354515	0.889632	0.056856	0.668896	0.849498	0.946488	0.989967	0.331104	0.281879	0.013378	0.16388	0.297659	0.48495	0.986622	0.411371
0.38121	0.368251	0.25054	0.259459	0.180541	0.175135	0.00324	0.273218	0.548596	0.780778	1	0.00216	0.240821	0.519438	0.766739	0.99892	0.00108	0.242981	0.429806	0.645788	0.967603	0.509719	0.115551	0.37473	0.04973	0.088649	0.006486	0.00108	0.181425	0.555076	0.794816	1	0.008639	0.268898	0.37473	0.518359	0.862851	0.007559	0.285097	0.488121	0.704104	0.984881	0.407127	0.330811	0.006479	0.240821	0.414687	0.595032	0.993521	0.403888
0.272189	0.573964	0.153846	0.220238	0.113095	0.113095	0.017751	0.183432	0.343195	0.47929	0.934911	0.011834	0.497041	0.656805	0.816568	0.994083	0.005917	0.076923	0.218935	0.35503	1	0.650888	0.218935	0.130178	0.083333	0.02381	0	0.005917	0.431953	0.633136	0.822485	1	0.04142	0.207101	0.295858	0.455621	0.869822	0.112426	0.136095	0.171598	0.360947	0.39645	0.591716	0.321429	0.035503	0.313609	0.662722	0.822485	0.988166	0.579882
0.282927	0.409756	0.307317	0.22549	0.196078	0.269608	0.009756	0.243902	0.404878	0.643902	0.956098	0.014634	0.22439	0.570732	0.804878	1	0.004878	0.239024	0.473171	0.702439	0.917073	0.409756	0.443902	0.146341	0.127451	0.039216	0	0.004878	0.326829	0.57561	0.809756	1	0.019512	0.297561	0.468293	0.643902	0.887805	0.078049	0.107317	0.24878	0.678049	0.970732	0.429268	0.441176	0.02439	0.253659	0.463415	0.702439	0.985366	0.419512
0.360544	0.439456	0.2	0.280654	0.16485	0.138965	0.005442	0.221769	0.482993	0.729252	1	0.002721	0.308844	0.510204	0.717007	0.995918	0.001361	0.205442	0.484354	0.823129	0.993197	0.72517	0.040816	0.234014	0.025886	0.036785	0.001362	0.001361	0.352381	0.533333	0.714286	1	0.020408	0.187755	0.201361	0.261224	0.859864	0.028571	0.136054	0.296599	0.92517	0.997279	0.217687	0.220708	0.006803	0.160544	0.302041	0.897959	0.993197	0.461224
0.365482	0.286802	0.347716	0.190597	0.287166	0.205845	0.002538	0.255076	0.517766	0.738579	0.998731	0.005076	0.239848	0.472081	0.756345	0.993655	0.001269	0.244924	0.496193	0.743655	1	0.468274	0.238579	0.293147	0.105464	0.062262	0.003812	0.001269	0.204315	0.44797	0.733503	1	0.03934	0.248731	0.423858	0.813452	0.998731	0.006345	0.322335	0.576142	0.706853	0.991117	0.567259	0.404066	0.003807	0.261421	0.475888	0.742386	0.997462	0.319797
0.272727	0.570707	0.156566	0.340102	0.086294	0.19797	0.025253	0.232323	0.555556	0.808081	0.994949	0.010101	0.20202	0.414141	0.686869	0.984848	0.005051	0.459596	0.646465	0.777778	1	0.666667	0.181818	0.151515	0.060914	0.030457	0	0.005051	0.181818	0.358586	0.747475	1	0.343434	0.414141	0.5	0.722222	0.89899	0.090909	0.611111	0.651515	0.808081	0.848485	0.378788	0.314721	0.10101	0.429293	0.540404	0.727273	0.944444	0.565657
0.274882	0.436019	0.2891	0.204762	0.157143	0.309524	0.066351	0.417062	0.606635	0.791469	0.990521	0.009479	0.189573	0.42654	0.725118	0.981043	0.004739	0.227488	0.412322	0.696682	1	0.492891	0.184834	0.322275	0.071429	0.061905	0.014286	0.004739	0.175355	0.317536	0.492891	1	0.085308	0.232227	0.454976	0.919431	0.995261	0.033175	0.559242	0.668246	0.758294	0.85782	0.511848	0.419048	0.014218	0.28436	0.445498	0.748815	0.995261	0.42654
0.319328	0.411765	0.268908	0.288136	0.20339	0.144068	0.016807	0.168067	0.529412	0.739496	0.983193	0.02521	0.252101	0.495798	0.747899	1	0.008403	0.235294	0.420168	0.722689	0.966387	0.445378	0.168067	0.386555	0.076271	0.059322	0.008475	0.008403	0.268908	0.394958	0.865546	1	0.210084	0.285714	0.436975	0.478992	0.966387	0.02521	0.109244	0.579832	0.672269	0.957983	0.512605	0.440678	0.02521	0.252101	0.453782	0.731092	0.966387	0.378151
0.416404	0.343849	0.239748	0.262658	0.158228	0.199367	0.028391	0.277603	0.536278	0.760252	1	0.006309	0.201893	0.460568	0.769716	0.993691	0.003155	0.246057	0.44164	0.665615	0.921136	0.637224	0.135647	0.227129	0.056962	0.063291	0	0.003155	0.176656	0.495268	0.77918	1	0.15142	0.242902	0.353312	0.85489	0.940063	0.072555	0.328076	0.523659	0.624606	0.842271	0.274448	0.322785	0.044164	0.249211	0.378549	0.599369	0.917981	0.353312
0.325905	0.384401	0.289694	0.23743	0.195531	0.203911	0.008357	0.21727	0.473538	0.763231	1	0.005571	0.231198	0.509749	0.724234	0.997214	0.002786	0.270195	0.493036	0.75766	0.986072	0.467967	0.239554	0.292479	0.086592	0.053073	0.00838	0.002786	0.181058	0.412256	0.632312	1	0.008357	0.228412	0.325905	0.506964	0.649025	0.094708	0.682451	0.810585	0.899721	0.986072	0.543175	0.324022	0.011142	0.24234	0.481894	0.690808	0.986072	0.395543
0.331169	0.383117	0.285714	0.30719	0.20915	0.24183	0.038961	0.253247	0.506494	0.75974	1	0.012987	0.266234	0.551948	0.772727	0.987013	0.006494	0.168831	0.402597	0.655844	0.993506	0.454545	0.142857	0.402597	0.091503	0.078431	0.013072	0.006494	0.233766	0.584416	0.772727	1	0.012987	0.038961	0.337662	0.727273	0.909091	0.097403	0.285714	0.435065	0.636364	0.987013	0.474026	0.398693	0.006494	0.207792	0.428571	0.714286	0.993506	0.409091
0.4	0.266667	0.333333	0.201681	0.252101	0.210084	0.016667	0.216667	0.516667	0.775	0.991667	0.041667	0.325	0.5	0.75	1	0.008333	0.175	0.408333	0.716667	0.916667	0.383333	0.166667	0.45	0.042017	0.092437	0.008403	0.008333	0.116667	0.341667	0.683333	1	0.266667	0.3	0.4	0.708333	0.75	0.075	0.45	0.591667	0.85	0.966667	0.441667	0.352941	0.05	0.366667	0.525	0.716667	0.95	0.166667
0.477477	0.189189	0.333333	0.2	0.327273	0.127273	0.018018	0.279279	0.54955	0.783784	0.981982	0.027027	0.18018	0.333333	0.45045	0.972973	0.009009	0.252252	0.504505	0.711712	1	0.315315	0.198198	0.486486	0.072727	0.109091	0	0.009009	0.207207	0.387387	0.657658	1	0.162162	0.225225	0.279279	0.675676	0.72973	0.054054	0.414414	0.558559	0.810811	0.963964	0.477477	0.381818	0.036036	0.342342	0.495495	0.702703	0.972973	0.18018
0.37234	0.297872	0.329787	0.215054	0.247312	0.193548	0.021277	0.212766	0.478723	0.755319	1	0.042553	0.329787	0.468085	0.670213	0.93617	0.010638	0.159574	0.510638	0.797872	0.968085	0.329787	0.297872	0.37234	0.107527	0.064516	0.021505	0.010638	0.148936	0.468085	0.606383	1	0.042553	0.106383	0.521277	0.659574	0.968085	0.170213	0.244681	0.340426	0.808511	0.93617	0.489362	0.430108	0.042553	0.234043	0.521277	0.712766	0.968085	0.276596
0.336538	0.331731	0.331731	0.2657	0.251208	0.217391	0.014423	0.230769	0.552885	0.778846	1	0.009615	0.221154	0.466346	0.745192	0.995192	0.004808	0.254808	0.480769	0.697115	0.947115	0.427885	0.384615	0.1875	0.130435	0.05314	0.004831	0.004808	0.274038	0.581731	0.793269	1	0.014423	0.298077	0.447115	0.629808	0.879808	0.081731	0.221154	0.567308	0.9375	0.985577	0.418269	0.444444	0.019231	0.240385	0.451923	0.677885	0.884615	0.360577
0.409091	0.42562	0.165289	0.298137	0.093168	0.144928	0.006198	0.475207	0.659091	0.830579	1	0.004132	0.194215	0.417355	0.67562	0.997934	0.002066	0.163223	0.27686	0.409091	0.995868	0.716942	0.068182	0.214876	0.018634	0.093168	0.00207	0.002066	0.303719	0.61157	0.793388	1	0.010331	0.07438	0.161157	0.206612	0.225207	0.095041	0.252066	0.411157	0.528926	0.985537	0.27686	0.231884	0.008264	0.113636	0.219008	0.326446	0.995868	0.46281
0.37013	0.272727	0.357143	0.117647	0.300654	0.24183	0.012987	0.318182	0.487013	0.662338	0.961039	0.038961	0.188312	0.461039	0.720779	1	0.006494	0.220779	0.532468	0.811688	0.993506	0.337662	0.298701	0.363636	0.117647	0.078431	0.013072	0.006494	0.175325	0.577922	0.766234	1	0.032468	0.25974	0.623377	0.883117	0.980519	0.012987	0.311688	0.402597	0.493506	0.824675	0.396104	0.470588	0.032468	0.220779	0.545455	0.779221	0.980519	0.272727
0.396914	0.237027	0.366059	0.179775	0.327247	0.174157	0.008415	0.26648	0.527349	0.771388	1	0.00561	0.246844	0.486676	0.704067	0.997195	0.001403	0.232819	0.472651	0.740533	0.998597	0.460028	0.225806	0.314165	0.095506	0.064607	0.002809	0.001403	0.210379	0.436185	0.750351	1	0.044881	0.151473	0.420757	0.837307	0.976157	0.007013	0.342216	0.565217	0.726508	0.997195	0.59467	0.41573	0.004208	0.255259	0.486676	0.741935	0.997195	0.237027
0.305785	0.371901	0.322314	0.196687	0.231884	0.26294	0.004132	0.241736	0.533058	0.774793	1	0.018595	0.256198	0.483471	0.743802	0.997934	0.002066	0.245868	0.477273	0.719008	0.979339	0.359504	0.231405	0.409091	0.080745	0.072464	0.00207	0.002066	0.289256	0.576446	0.822314	1	0.006198	0.159091	0.328512	0.63843	0.971074	0.035124	0.247934	0.52686	0.729339	0.948347	0.578512	0.397516	0.006198	0.280992	0.481405	0.694215	0.983471	0.380165
0.41	0.25	0.34	0.151515	0.252525	0.161616	0.06	0.31	0.53	0.77	0.98	0.03	0.17	0.4	0.56	1	0.01	0.22	0.49	0.72	0.99	0.47	0.53	0	0.181818	0	0	0.01	0.3	0.53	0.8	1	0.02	0.19	0.38	0.69	0.97	0	0	0	0	0	0.36	0.484848	0.02	0.2	0.45	0.71	0.96	0.26
0.337079	0.41573	0.247191	0.278873	0.15493	0.216901	0.005618	0.230337	0.474719	0.755618	0.997191	0.008427	0.27809	0.542135	0.764045	0.988764	0.002809	0.219101	0.469101	0.716292	1	0.542135	0.168539	0.289326	0.070423	0.053521	0.008451	0.002809	0.272472	0.530899	0.794944	1	0.087079	0.148876	0.491573	0.733146	0.977528	0.05618	0.247191	0.441011	0.679775	0.896067	0.424157	0.383099	0.022472	0.241573	0.438202	0.69382	0.994382	0.455056
0.512448	0.298755	0.188797	0.288981	0.178794	0.118503	0.010373	0.205394	0.441909	0.757261	1	0.004149	0.381743	0.607884	0.827801	0.997925	0.002075	0.288382	0.489627	0.624481	0.987552	0.510373	0.074689	0.414938	0.029106	0.04158	0.004158	0.002075	0.404564	0.672199	0.838174	1	0.3361	0.419087	0.560166	0.622407	0.989627	0.03112	0.145228	0.248963	0.512448	0.941909	0.284232	0.29106	0.018672	0.36722	0.506224	0.636929	0.991701	0.311203
0.440217	0.375	0.184783	0.305177	0.158038	0.119891	0.01087	0.195652	0.527174	0.758152	0.994565	0.005435	0.252717	0.429348	0.638587	0.991848	0.002717	0.413043	0.589674	0.766304	1	0.48913	0.070652	0.440217	0.038147	0.087193	0	0.002717	0.163043	0.334239	0.61413	1	0.105978	0.402174	0.486413	0.565217	0.951087	0.016304	0.38587	0.660326	0.782609	0.997283	0.258152	0.294278	0.024457	0.415761	0.565217	0.722826	0.98913	0.4375
0.355072	0.304348	0.34058	0.189781	0.262774	0.218978	0.028986	0.253623	0.442029	0.710145	0.978261	0.014493	0.152174	0.557971	0.717391	0.985507	0.007246	0.275362	0.492754	0.73913	1	0.231884	0	0.768116	0	0.10219	0	0.007246	0.268116	0.550725	0.833333	1	0	0	0	0	0	0.021739	0.231884	0.456522	0.724638	0.956522	0.543478	0.408759	0.028986	0.304348	0.528986	0.724638	0.956522	0.311594
0.340479	0.30517	0.354351	0.195707	0.233586	0.214646	0.003783	0.240858	0.514502	0.774275	0.998739	0.002522	0.250946	0.471627	0.709962	1	0.001261	0.258512	0.509458	0.759142	0.997478	0.319042	0.025221	0.655738	0.011364	0.082071	0.003788	0.001261	0.238335	0.390921	0.663304	1	0.363178	0.368222	0.542245	0.762926	0.789407	0.032787	0.244641	0.527112	0.781841	0.997478	0.544767	0.376263	0.025221	0.262295	0.481715	0.741488	0.994956	0.319042
0.52809	0.191011	0.280899	0.159091	0.284091	0.159091	0.033708	0.247191	0.516854	0.764045	1	0.022472	0.168539	0.337079	0.573034	0.876404	0.011236	0.325843	0.494382	0.752809	0.977528	0.247191	0	0.752809	0	0.090909	0	0.011236	0.191011	0.258427	0.550562	1	0	0	0	0	0	0.05618	0.314607	0.505618	0.752809	0.955056	0.393258	0.431818	0.089888	0.314607	0.483146	0.707865	0.977528	0.157303
0.354839	0.354839	0.290323	0.26087	0.206522	0.217391	0.043011	0.247312	0.430108	0.709677	1	0.021505	0.225806	0.526882	0.698925	0.956989	0.010753	0.129032	0.451613	0.731183	0.978495	0.451613	0.215054	0.333333	0.086957	0.108696	0	0.010753	0.236559	0.505376	0.677419	1	0.032258	0.075269	0.129032	0.55914	0.752688	0.193548	0.387097	0.473118	0.892473	0.978495	0.419355	0.413043	0.032258	0.11828	0.451613	0.709677	0.946237	0.397849
0.36377	0.416789	0.21944	0.262537	0.179941	0.165192	0.002946	0.265096	0.477172	0.734904	0.994109	0.005891	0.216495	0.546392	0.740795	0.997054	0.001473	0.253314	0.458027	0.762887	1	0.689249	0.029455	0.281296	0.022124	0.081121	0.013274	0.001473	0.215022	0.5243	0.733432	1	0.032401	0.409426	0.425626	0.837997	0.949926	0.050074	0.301915	0.466863	0.904271	0.991163	0.322533	0.39823	0.011782	0.284242	0.513991	0.751105	0.995582	0.409426
0.368421	0.410526	0.221053	0.380952	0.164021	0.15873	0.015789	0.315789	0.610526	0.789474	1	0.010526	0.268421	0.510526	0.778947	0.984211	0.005263	0.157895	0.347368	0.515789	0.889474	0.347368	0.294737	0.357895	0.058201	0.089947	0.005291	0.005263	0.305263	0.721053	0.905263	1	0.021053	0.378947	0.463158	0.536842	0.9	0.068421	0.173684	0.273684	0.621053	0.942105	0.321053	0.359788	0.021053	0.178947	0.310526	0.478947	0.878947	0.431579
0.369697	0.377778	0.252525	0.251012	0.198381	0.192308	0.00404	0.242424	0.547475	0.761616	0.99798	0.006061	0.193939	0.460606	0.747475	1	0.00202	0.29697	0.474747	0.731313	0.987879	0.517172	0.080808	0.40202	0.038462	0.082996	0.010121	0.00202	0.157576	0.432323	0.777778	1	0.076768	0.276768	0.39596	0.60202	0.672727	0.008081	0.361616	0.541414	0.765657	0.989899	0.448485	0.417004	0.014141	0.270707	0.466667	0.668687	0.987879	0.448485
0.315305	0.402762	0.281933	0.240783	0.192396	0.248848	0.005754	0.243959	0.475259	0.713464	0.998849	0.002301	0.254315	0.508631	0.758343	1	0.001151	0.227848	0.517837	0.75374	0.997699	0.497123	0.228999	0.273878	0.102535	0.056452	0.003456	0.001151	0.216341	0.471807	0.741082	1	0.039125	0.180667	0.43153	0.812428	0.997699	0.006904	0.331415	0.542002	0.697353	0.991945	0.562716	0.40553	0.003452	0.247411	0.479862	0.733026	0.997699	0.432681
0.453228	0.305665	0.241107	0.271768	0.224274	0.156992	0.013175	0.283267	0.474308	0.768116	0.998682	0.002635	0.26087	0.524374	0.783926	1	0.001318	0.188406	0.482213	0.699605	0.997365	0.513834	0.171278	0.314888	0.064644	0.077836	0.001319	0.001318	0.251647	0.549407	0.83004	1	0.006588	0.189723	0.382082	0.545455	0.747036	0.022398	0.272727	0.517787	0.732543	0.976285	0.345191	0.290237	0.00527	0.201581	0.399209	0.636364	0.997365	0.350461
0.512465	0.3241	0.163435	0.297222	0.152778	0.091667	0.019391	0.32964	0.559557	0.792244	0.98892	0.00554	0.185596	0.33795	0.587258	0.99446	0.00277	0.315789	0.567867	0.781163	1	0.401662	0.027701	0.570637	0.011111	0.072222	0	0.00277	0.157895	0.288089	0.534626	1	0.548476	0.551247	0.559557	0.565097	0.781163	0.01108	0.385042	0.65928	0.828255	0.98892	0.174515	0.255556	0.01108	0.32133	0.65374	0.775623	0.99169	0.34349
0.292614	0.465909	0.241477	0.290598	0.136752	0.188034	0.008523	0.258523	0.522727	0.801136	0.997159	0.005682	0.184659	0.392045	0.639205	0.991477	0.002841	0.40625	0.616477	0.786932	1	0.616477	0.215909	0.167614	0.068376	0.034188	0.005698	0.002841	0.153409	0.306818	0.605114	1	0.329545	0.428977	0.622159	0.821023	0.977273	0.494318	0.596591	0.715909	0.84375	0.903409	0.596591	0.358974	0.017045	0.247159	0.528409	0.730114	0.977273	0.471591
0.37561	0.35122	0.273171	0.269608	0.254902	0.181373	0.014634	0.195122	0.419512	0.692683	1	0.009756	0.239024	0.502439	0.765854	0.995122	0.004878	0.356098	0.560976	0.77561	0.985366	0.502439	0.165854	0.331707	0.068627	0.088235	0.009804	0.004878	0.156098	0.521951	0.77561	1	0.219512	0.282927	0.619512	0.946341	0.990244	0.039024	0.341463	0.439024	0.721951	0.926829	0.458537	0.470588	0.019512	0.360976	0.517073	0.746341	0.985366	0.317073
0.338422	0.343511	0.318066	0.221939	0.232143	0.206633	0.010178	0.251908	0.491094	0.773537	0.997455	0.005089	0.24173	0.529262	0.75827	0.989822	0.002545	0.234097	0.463104	0.689567	1	0.348601	0.129771	0.521628	0.048469	0.084184	0.007653	0.002545	0.262087	0.552163	0.816794	1	0.017812	0.229008	0.287532	0.671756	0.928753	0.02799	0.312977	0.486005	0.717557	0.969466	0.56743	0.372449	0.007634	0.29771	0.562341	0.740458	0.97201	0.37659
0.404632	0.257493	0.337875	0.204638	0.270123	0.169168	0.002725	0.27248	0.543597	0.769755	0.99455	0.010899	0.192098	0.440054	0.69346	0.997275	0.001362	0.257493	0.50545	0.735695	1	0.43188	0.179837	0.388283	0.087312	0.065484	0.002729	0.001362	0.280654	0.549046	0.803815	1	0.00545	0.179837	0.450954	0.867847	0.998638	0.027248	0.26158	0.483651	0.610354	0.948229	0.536785	0.392906	0.006812	0.265668	0.480926	0.711172	0.995913	0.280654
0.306667	0.410794	0.28254	0.243329	0.190597	0.210292	0.003175	0.246349	0.475556	0.723175	1	0.00127	0.289524	0.613968	0.787302	0.99873	0.000635	0.208254	0.420317	0.624127	0.998095	0.624762	0.172698	0.20254	0.064168	0.047649	0.006989	0.000635	0.366984	0.658413	0.823492	1	0.012063	0.11746	0.236825	0.513016	0.972063	0.001905	0.222857	0.311111	0.480635	0.908571	0.462857	0.343075	0.001905	0.191111	0.39746	0.604444	0.998095	0.44127
0.265152	0.390152	0.344697	0.235741	0.174905	0.315589	0.018939	0.227273	0.560606	0.82197	0.992424	0.007576	0.295455	0.511364	0.80303	1	0.003788	0.204545	0.412879	0.628788	0.981061	0.496212	0.348485	0.155303	0.102662	0.064639	0.003802	0.003788	0.314394	0.579545	0.863636	1	0.011364	0.246212	0.409091	0.602273	0.962121	0.05303	0.094697	0.511364	0.768939	0.82197	0.481061	0.418251	0.011364	0.261364	0.454545	0.625	0.981061	0.412879
0.407855	0.29003	0.302115	0.22379	0.241935	0.169355	0.005035	0.283988	0.529708	0.767372	0.998993	0.002014	0.213494	0.48137	0.738167	0.997986	0.001007	0.248741	0.460222	0.736153	1	0.471299	0.145015	0.383686	0.063508	0.085685	0.001008	0.001007	0.260826	0.598187	0.826788	1	0.038268	0.240685	0.524673	0.803625	0.984894	0.014099	0.230614	0.407855	0.632427	0.992951	0.453172	0.395161	0.004028	0.209466	0.444109	0.673716	0.993958	0.328298
0.312207	0.393192	0.294601	0.233843	0.20564	0.242068	0.005869	0.254695	0.491784	0.746479	0.998826	0.004695	0.25	0.512911	0.757042	1	0.001174	0.230047	0.480047	0.737089	0.997653	0.478873	0.228873	0.292254	0.097532	0.057579	0.003525	0.001174	0.203052	0.460094	0.734742	1	0.042254	0.20892	0.424883	0.769953	0.997653	0.005869	0.333333	0.580986	0.75	0.991784	0.556338	0.40658	0.003521	0.253521	0.474178	0.732394	0.997653	0.440141
0.313576	0.414914	0.271511	0.247126	0.166667	0.222222	0.007648	0.258126	0.48566	0.739962	0.99044	0.003824	0.225621	0.491396	0.764818	1	0.001912	0.263862	0.527725	0.726577	0.998088	0.669216	0.152964	0.17782	0.061303	0.05364	0	0.001912	0.246654	0.535373	0.808795	1	0.00956	0.208413	0.374761	0.608031	0.996176	0.128107	0.342256	0.483748	0.694073	0.982792	0.479924	0.321839	0.005736	0.3174	0.602294	0.814532	0.998088	0.409178
0.295597	0.399371	0.305031	0.189274	0.192429	0.258675	0.015723	0.204403	0.525157	0.779874	1	0.006289	0.261006	0.522013	0.786164	0.996855	0.003145	0.22956	0.462264	0.654088	0.918239	0.45283	0.157233	0.389937	0.053628	0.085174	0.003155	0.003145	0.191824	0.443396	0.713836	1	0.015723	0.27673	0.424528	0.606918	0.688679	0.012579	0.248428	0.522013	0.795597	0.933962	0.506289	0.410095	0.009434	0.245283	0.462264	0.650943	0.927673	0.424528
0.389432	0.27593	0.334638	0.186275	0.256863	0.201961	0.003914	0.217221	0.516634	0.755382	0.996086	0.007828	0.240705	0.471624	0.708415	0.998043	0.001957	0.262231	0.48728	0.761252	1	0.365949	0.162427	0.471624	0.07451	0.082353	0.015686	0.001957	0.277886	0.530333	0.735812	1	0.005871	0.409002	0.604697	0.776908	0.984344	0.011742	0.205479	0.393346	0.74364	0.996086	0.455969	0.407843	0.005871	0.268102	0.46184	0.726027	0.992172	0.266145
0.454545	0.222222	0.323232	0.244898	0.357143	0.081633	0.020202	0.252525	0.454545	0.727273	1	0.030303	0.333333	0.565657	0.666667	0.949495	0.010101	0.171717	0.383838	0.777778	0.979798	0.353535	0.272727	0.373737	0.081633	0.061224	0	0.010101	0.080808	0.434343	0.626263	1	0.10101	0.151515	0.525253	0.646465	0.717172	0.242424	0.323232	0.757576	0.848485	0.979798	0.484848	0.428571	0.050505	0.222222	0.555556	0.777778	0.979798	0.161616
0.361345	0.305322	0.333333	0.202247	0.219101	0.233146	0.016807	0.243697	0.518207	0.759104	0.994398	0.005602	0.252101	0.47619	0.722689	1	0.002801	0.232493	0.464986	0.739496	0.997199	0.408964	0.140056	0.45098	0.058989	0.070225	0.008427	0.002801	0.226891	0.509804	0.680672	1	0.011204	0.173669	0.27451	0.621849	0.831933	0.078431	0.319328	0.518207	0.826331	0.983193	0.467787	0.376404	0.011204	0.260504	0.467787	0.770308	0.985994	0.308123
0.275552	0.399862	0.324586	0.212163	0.188666	0.25501	0.004834	0.277624	0.517956	0.751381	0.994475	0.001381	0.242403	0.481354	0.723757	0.998619	0.000691	0.226519	0.506215	0.774862	1	0.54558	0.349448	0.104972	0.115411	0.036628	0.00622	0.000691	0.245166	0.473066	0.700276	1	0.014503	0.223066	0.486188	0.766575	0.935773	0.002072	0.361878	0.731354	0.955801	0.998619	0.602901	0.304077	0.002072	0.23895	0.5	0.756906	0.997928	0.412293
0.323353	0.402695	0.273952	0.22039	0.176912	0.235382	0.004491	0.278443	0.476048	0.760479	1	0.010479	0.229042	0.552395	0.751497	0.998503	0.001497	0.238024	0.477545	0.717066	0.994012	0.571856	0.151198	0.276946	0.056972	0.05997	0	0.001497	0.212575	0.525449	0.738024	1	0.068862	0.200599	0.33982	0.447605	0.601796	0.086826	0.363772	0.609281	0.911677	0.992515	0.519461	0.311844	0.005988	0.308383	0.618263	0.763473	0.994012	0.404192
0.331412	0.391931	0.276657	0.291908	0.196532	0.205202	0.005764	0.221902	0.455331	0.731988	1	0.017291	0.25072	0.510086	0.78098	0.994236	0.002882	0.236311	0.51585	0.73487	0.988473	0.299712	0.288184	0.412104	0.078035	0.072254	0.00289	0.002882	0.319885	0.501441	0.729107	1	0.123919	0.342939	0.489914	0.639769	0.933718	0.008646	0.227666	0.538905	0.861671	0.994236	0.501441	0.358382	0.011527	0.270893	0.530259	0.740634	0.991354	0.420749
0.392381	0.361905	0.245714	0.257634	0.179389	0.177481	0.005714	0.238095	0.451429	0.729524	1	0.00381	0.31619	0.506667	0.75619	0.994286	0.001905	0.167619	0.539048	0.752381	0.998095	0.700952	0.049524	0.249524	0.032443	0.051527	0.001908	0.001905	0.375238	0.579048	0.801905	1	0.344762	0.36	0.647619	0.857143	0.965714	0.005714	0.07619	0.150476	0.228571	0.96	0.348571	0.412214	0.011429	0.173333	0.499048	0.75619	0.980952	0.4
0.416244	0.22335	0.360406	0.183673	0.270408	0.153061	0.015228	0.19797	0.431472	0.705584	1	0.010152	0.208122	0.548223	0.720812	0.994924	0.005076	0.335025	0.532995	0.77665	0.989848	0.492386	0.152284	0.35533	0.061224	0.081633	0.020408	0.005076	0.15736	0.527919	0.730964	1	0.238579	0.274112	0.614213	0.715736	0.989848	0.040609	0.350254	0.461929	0.756345	0.959391	0.461929	0.418367	0.020305	0.340102	0.51269	0.675127	0.989848	0.192893
0.335	0.335	0.33	0.231156	0.226131	0.221106	0.01	0.215	0.465	0.735	1	0.055	0.255	0.415	0.67	0.94	0.005	0.24	0.595	0.805	0.995	0.55	0.11	0.34	0.060302	0.070352	0	0.005	0.245	0.385	0.68	1	0.03	0.4	0.7	0.81	0.91	0.055	0.17	0.54	0.775	0.97	0.475	0.371859	0.035	0.335	0.525	0.77	0.97	0.305
0.439535	0.32093	0.239535	0.261072	0.188811	0.181818	0.009302	0.25814	0.462791	0.748837	1	0.004651	0.181395	0.495349	0.723256	0.983721	0.002326	0.313953	0.54186	0.751163	0.953488	0.595349	0.15814	0.246512	0.072261	0.095571	0.002331	0.002326	0.197674	0.446512	0.755814	1	0.07907	0.506977	0.632558	0.772093	0.951163	0.016279	0.267442	0.372093	0.704651	0.990698	0.323256	0.344988	0.05814	0.27907	0.532558	0.723256	0.97907	0.330233
0.349206	0.361905	0.288889	0.235669	0.210191	0.203822	0.015873	0.266667	0.438095	0.688889	0.996825	0.006349	0.250794	0.536508	0.771429	0.993651	0.003175	0.206349	0.51746	0.790476	1	0.555556	0.250794	0.193651	0.124204	0.066879	0.003185	0.003175	0.266667	0.479365	0.749206	1	0.038095	0.273016	0.539683	0.796825	0.996825	0.066667	0.215873	0.406349	0.593651	0.933333	0.549206	0.33121	0.019048	0.215873	0.514286	0.730159	0.990476	0.380952
0.468927	0.316384	0.214689	0.340909	0.221591	0.125	0.022599	0.242938	0.497175	0.768362	1	0.011299	0.225989	0.542373	0.779661	0.977401	0.00565	0.248588	0.440678	0.649718	0.920904	0.525424	0.124294	0.350282	0.034091	0.079545	0.011364	0.00565	0.180791	0.497175	0.762712	1	0.146893	0.220339	0.60452	0.887006	0.920904	0.101695	0.310734	0.463277	0.683616	0.971751	0.435028	0.386364	0.033898	0.248588	0.480226	0.717514	0.949153	0.389831
0.301136	0.400568	0.298295	0.225071	0.185185	0.239316	0.005682	0.176136	0.420455	0.644886	0.997159	0.014205	0.318182	0.568182	0.803977	1	0.002841	0.238636	0.454545	0.707386	0.985795	0.534091	0.190341	0.275568	0.068376	0.05698	0	0.002841	0.269886	0.525568	0.803977	1	0.045455	0.173295	0.332386	0.585227	0.826705	0.008523	0.255682	0.539773	0.721591	0.948864	0.471591	0.358974	0.017045	0.261364	0.556818	0.8125	0.991477	0.380682
0.378378	0.27027	0.351351	0.19661	0.281356	0.216949	0.02027	0.216216	0.422297	0.702703	1	0.006757	0.266892	0.547297	0.777027	0.993243	0.003378	0.256757	0.510135	0.760135	0.996622	0.405405	0.081081	0.513514	0.044068	0.084746	0.016949	0.003378	0.27027	0.570946	0.783784	1	0.256757	0.287162	0.47973	0.625	0.77027	0.023649	0.182432	0.5	0.746622	0.989865	0.459459	0.508475	0.010135	0.280405	0.570946	0.760135	0.986486	0.320946
0.419847	0.315522	0.264631	0.227041	0.221939	0.168367	0.007634	0.234097	0.452926	0.70229	0.994911	0.005089	0.290076	0.559796	0.770992	1	0.002545	0.201018	0.450382	0.776081	0.997455	0.391858	0.185751	0.422392	0.056122	0.066327	0.015306	0.002545	0.320611	0.541985	0.704835	1	0.239186	0.725191	0.804071	0.903308	0.979644	0.022901	0.157761	0.302799	0.590331	0.994911	0.384224	0.387755	0.022901	0.193384	0.43257	0.760814	0.992366	0.333333
0.289855	0.415459	0.294686	0.228155	0.126214	0.276699	0.043478	0.323671	0.560386	0.768116	1	0.009662	0.207729	0.42029	0.714976	0.995169	0.004831	0.193237	0.512077	0.710145	0.971014	0.565217	0.256039	0.178744	0.097087	0.038835	0.009709	0.004831	0.154589	0.362319	0.550725	1	0.024155	0.275362	0.657005	0.772947	0.966184	0.415459	0.57971	0.623188	0.884058	0.980676	0.468599	0.407767	0.024155	0.275362	0.497585	0.772947	0.971014	0.449275
0.388235	0.329412	0.282353	0.25	0.214286	0.178571	0.070588	0.223529	0.517647	0.658824	1	0.058824	0.341176	0.623529	0.835294	0.988235	0.011765	0.152941	0.352941	0.6	0.894118	0.317647	0.305882	0.376471	0.119048	0.047619	0	0.011765	0.188235	0.435294	0.917647	1	0.023529	0.082353	0.235294	0.341176	0.494118	0.517647	0.6	0.694118	0.811765	0.905882	0.388235	0.47619	0.023529	0.211765	0.4	0.564706	0.929412	0.4
0.307246	0.408696	0.284058	0.211901	0.187228	0.226415	0.004348	0.292754	0.549275	0.755072	1	0.005797	0.168116	0.437681	0.743478	0.989855	0.001449	0.317391	0.53913	0.744928	0.992754	0.576812	0.14058	0.282609	0.05225	0.087083	0.002903	0.001449	0.215942	0.469565	0.798551	1	0.015942	0.486957	0.637681	0.715942	0.975362	0.062319	0.226087	0.410145	0.676812	0.965217	0.472464	0.444122	0.005797	0.27971	0.553623	0.747826	0.986957	0.417391
0.440771	0.316804	0.242424	0.279006	0.198895	0.179558	0.008264	0.294766	0.570248	0.763085	1	0.00551	0.206612	0.4573	0.757576	0.986226	0.002755	0.239669	0.446281	0.69697	0.975207	0.592287	0.143251	0.264463	0.060773	0.071823	0.005525	0.002755	0.206612	0.413223	0.757576	1	0.013774	0.231405	0.471074	0.586777	0.977961	0.024793	0.432507	0.628099	0.790634	0.969697	0.38292	0.364641	0.013774	0.250689	0.471074	0.699725	0.986226	0.369146
0.441441	0.297297	0.261261	0.290909	0.163636	0.127273	0.018018	0.288288	0.486486	0.747748	0.981982	0.063063	0.261261	0.495495	0.675676	0.990991	0.009009	0.207207	0.351351	0.684685	1	0.45045	0.54955	0	0.181818	0	0	0.009009	0.18018	0.477477	0.711712	1	0.036036	0.243243	0.567568	0.792793	0.990991	0	0	0	0	0	0.441441	0.290909	0.036036	0.243243	0.54955	0.675676	0.936937	0.315315
0.376068	0.367521	0.25641	0.301724	0.198276	0.172414	0.025641	0.264957	0.470085	0.675214	0.991453	0.017094	0.25641	0.564103	0.871795	1	0.008547	0.179487	0.452991	0.623932	0.854701	0.521368	0.384615	0.094017	0.094828	0.043103	0.008621	0.008547	0.376068	0.555556	0.854701	1	0.034188	0.17094	0.307692	0.504274	0.692308	0.666667	0.675214	0.74359	0.769231	0.871795	0.376068	0.534483	0.051282	0.188034	0.470085	0.65812	0.897436	0.367521
0.266541	0.429112	0.304348	0.179924	0.176136	0.285985	0.017013	0.362949	0.553875	0.814745	0.99811	0.003781	0.155009	0.398866	0.697543	0.996219	0.00189	0.289225	0.514178	0.725898	1	0.627599	0.204159	0.168242	0.079545	0.034091	0	0.00189	0.166352	0.431002	0.729679	1	0.056711	0.345936	0.523629	0.741021	0.94896	0.241966	0.413989	0.640832	0.763705	0.886578	0.483932	0.337121	0.022684	0.192817	0.444234	0.705104	0.990548	0.425331
0.379958	0.31524	0.304802	0.217573	0.240586	0.196653	0.010438	0.271399	0.532359	0.778706	1	0.004175	0.212944	0.442589	0.713987	0.995825	0.002088	0.258873	0.488518	0.732777	0.989562	0.409186	0.177453	0.413361	0.07113	0.083682	0.004184	0.002088	0.25261	0.517745	0.770355	1	0.087683	0.36952	0.509395	0.7119	0.993737	0.008351	0.194154	0.480167	0.734864	0.966597	0.542797	0.39749	0.008351	0.235908	0.473904	0.695198	0.995825	0.338205
0.369942	0.369942	0.260116	0.284884	0.197674	0.238372	0.011561	0.202312	0.445087	0.803468	1	0.023121	0.260116	0.49711	0.716763	0.99422	0.00578	0.254335	0.520231	0.710983	0.965318	0.566474	0.179191	0.254335	0.052326	0.075581	0.005814	0.00578	0.17341	0.34104	0.624277	1	0.242775	0.393064	0.635838	0.682081	0.884393	0.023121	0.491329	0.734104	0.797688	0.965318	0.549133	0.337209	0.023121	0.33526	0.554913	0.710983	0.965318	0.398844
0.30491	0.310078	0.385013	0.183938	0.243523	0.246114	0.01292	0.193798	0.49354	0.764858	1	0.005168	0.312661	0.498708	0.74677	0.981912	0.002584	0.22739	0.490956	0.731266	0.992248	0.356589	0.217054	0.426357	0.080311	0.069948	0.002591	0.002584	0.22739	0.459948	0.795866	1	0.02584	0.206718	0.397933	0.537468	0.901809	0.064599	0.320413	0.607235	0.775194	0.992248	0.594315	0.414508	0.020672	0.286822	0.50646	0.741602	0.992248	0.322997
0.337963	0.354167	0.30787	0.25522	0.206497	0.222738	0.020833	0.256944	0.5	0.777778	1	0.00463	0.219907	0.488426	0.726852	0.997685	0.002315	0.268519	0.50463	0.715278	0.99537	0.335648	0.150463	0.513889	0.064965	0.092807	0.009281	0.002315	0.206019	0.497685	0.810185	1	0.048611	0.284722	0.50463	0.928241	0.99537	0.018519	0.263889	0.481481	0.715278	0.907407	0.571759	0.37587	0.013889	0.252315	0.456019	0.69213	0.99537	0.358796
0.370968	0.298387	0.330645	0.268293	0.235772	0.203252	0.040323	0.209677	0.483871	0.669355	0.975806	0.016129	0.217742	0.435484	0.741935	0.983871	0.008065	0.258065	0.564516	0.717742	1	0.435484	0.153226	0.41129	0.04878	0.081301	0	0.008065	0.209677	0.629032	0.774194	1	0.233871	0.258065	0.362903	0.403226	0.709677	0.040323	0.153226	0.524194	0.782258	0.887097	0.435484	0.308943	0.024194	0.354839	0.516129	0.693548	0.919355	0.266129
0.339506	0.391975	0.268519	0.250774	0.216718	0.195046	0.018519	0.271605	0.496914	0.805556	1	0.006173	0.274691	0.509259	0.679012	0.990741	0.003086	0.197531	0.475309	0.765432	0.996914	0.540123	0.179012	0.280864	0.065015	0.058824	0.009288	0.003086	0.290123	0.537037	0.694444	1	0.074074	0.138889	0.70679	0.817901	0.938272	0.037037	0.231481	0.354938	0.641975	0.978395	0.453704	0.408669	0.012346	0.231481	0.469136	0.712963	0.941358	0.459877
0.343137	0.367647	0.289216	0.275862	0.216749	0.211823	0.039216	0.294118	0.5	0.79902	0.990196	0.009804	0.230392	0.47549	0.72549	1	0.004902	0.171569	0.465686	0.661765	0.946078	0.421569	0.328431	0.25	0.068966	0.059113	0.009852	0.004902	0.132353	0.254902	0.534314	1	0.014706	0.333333	0.764706	0.857843	0.941176	0.063725	0.495098	0.578431	0.666667	0.985294	0.45098	0.413793	0.014706	0.313725	0.519608	0.745098	0.931373	0.387255
0.324176	0.516484	0.159341	0.297521	0.101928	0.121212	0.008242	0.362637	0.60989	0.791209	1	0.005495	0.17033	0.46978	0.752747	0.991758	0.002747	0.252747	0.379121	0.612637	0.997253	0.835165	0.131868	0.032967	0.046832	0.019284	0.008264	0.002747	0.285714	0.574176	0.785714	1	0.065934	0.25	0.296703	0.376374	0.994505	0.008242	0.013736	0.021978	0.343407	0.71978	0.318681	0.292011	0.010989	0.137363	0.35989	0.642857	0.994505	0.53022
0.279245	0.366038	0.354717	0.200758	0.231061	0.238636	0.026415	0.271698	0.464151	0.773585	0.996226	0.007547	0.181132	0.498113	0.720755	0.984906	0.003774	0.283019	0.520755	0.724528	1	0.418868	0.29434	0.286792	0.087121	0.041667	0.003788	0.003774	0.207547	0.50566	0.690566	1	0.124528	0.222642	0.460377	0.713208	0.856604	0.018868	0.362264	0.539623	0.920755	0.992453	0.566038	0.386364	0.011321	0.267925	0.509434	0.728302	0.988679	0.388679
0.391892	0.288288	0.31982	0.253394	0.248869	0.199095	0.009009	0.225225	0.45045	0.743243	1	0.027027	0.279279	0.576577	0.72973	0.959459	0.004505	0.220721	0.504505	0.756757	0.990991	0.36036	0.252252	0.387387	0.085973	0.067873	0.004525	0.004505	0.198198	0.405405	0.738739	1	0.144144	0.301802	0.522523	0.774775	0.981982	0.036036	0.337838	0.490991	0.675676	0.882883	0.432432	0.470588	0.027027	0.306306	0.536036	0.765766	0.981982	0.310811
0.370455	0.304545	0.325	0.218679	0.225513	0.191344	0.004545	0.243182	0.556818	0.8	1	0.009091	0.272727	0.518182	0.763636	0.997727	0.002273	0.231818	0.438636	0.647727	0.977273	0.525	0.236364	0.238636	0.093394	0.056948	0.002278	0.002273	0.256818	0.547727	0.793182	1	0.077273	0.179545	0.443182	0.677273	0.945455	0.009091	0.243182	0.554545	0.613636	0.993182	0.504545	0.323462	0.011364	0.256818	0.447727	0.715909	0.936364	0.361364
0.3509	0.312339	0.336761	0.20592	0.243243	0.221364	0.006427	0.258355	0.51671	0.760925	1	0.005141	0.235219	0.48329	0.736504	0.997429	0.001285	0.22108	0.488432	0.733933	0.998715	0.471722	0.22365	0.304627	0.095238	0.059202	0.005148	0.001285	0.24036	0.456298	0.74036	1	0.041131	0.152956	0.494859	0.818766	0.998715	0.006427	0.327763	0.537275	0.706941	0.992288	0.569409	0.42471	0.003856	0.236504	0.474293	0.744216	0.998715	0.347044
0.378007	0.257732	0.364261	0.2	0.275862	0.17931	0.006873	0.316151	0.553265	0.742268	0.975945	0.010309	0.158076	0.38488	0.745704	0.993127	0.003436	0.278351	0.501718	0.735395	1	0.381443	0.268041	0.350515	0.072414	0.051724	0.003448	0.003436	0.216495	0.446735	0.752577	1	0.013746	0.182131	0.522337	0.783505	0.955326	0.054983	0.274914	0.491409	0.67354	0.910653	0.573883	0.337931	0.010309	0.199313	0.43299	0.714777	0.989691	0.278351
0.337143	0.491429	0.171429	0.332378	0.174785	0.120344	0.008571	0.225714	0.431429	0.642857	1	0.005714	0.377143	0.682857	0.851429	0.994286	0.002857	0.154286	0.3	0.46	0.625714	0.585714	0.14	0.274286	0.045845	0.051576	0	0.002857	0.445714	0.665714	0.837143	1	0.028571	0.16	0.214286	0.425714	0.577143	0.077143	0.24	0.357143	0.471429	0.991429	0.428571	0.401146	0.014286	0.191429	0.391429	0.557143	0.925714	0.5
0.20283	0.584906	0.212264	0.186761	0.104019	0.219858	0.018868	0.15566	0.308962	0.455189	1	0.004717	0.391509	0.629717	0.799528	0.997642	0.002358	0.17217	0.34434	0.582547	0.995283	0.721698	0.125	0.153302	0.042553	0.047281	0	0.002358	0.398585	0.629717	0.818396	1	0.033019	0.108491	0.20283	0.308962	0.412736	0.018868	0.153302	0.28066	0.436321	0.775943	0.603774	0.335697	0.03066	0.339623	0.601415	0.778302	0.995283	0.549528
0.359459	0.348649	0.291892	0.265583	0.216802	0.197832	0.005405	0.22973	0.464865	0.762162	0.997297	0.010811	0.218919	0.481081	0.710811	1	0.002703	0.3	0.543243	0.735135	0.994595	0.483784	0.156757	0.359459	0.056911	0.067751	0.00813	0.002703	0.227027	0.540541	0.775676	1	0.235135	0.386486	0.543243	0.683784	0.994595	0.091892	0.2	0.427027	0.751351	0.918919	0.502703	0.325203	0.054054	0.291892	0.5	0.713514	0.994595	0.383784
0.360656	0.344262	0.295082	0.240132	0.220395	0.223684	0.019672	0.288525	0.521311	0.790164	0.996721	0.006557	0.17377	0.44918	0.714754	1	0.003279	0.268852	0.514754	0.737705	0.990164	0.42623	0.413115	0.160656	0.108553	0.055921	0.016447	0.003279	0.229508	0.504918	0.754098	1	0.101639	0.272131	0.527869	0.727869	0.977049	0.039344	0.07541	0.354098	0.622951	0.901639	0.455738	0.401316	0.04918	0.272131	0.481967	0.727869	0.990164	0.35082
0.259542	0.381679	0.358779	0.215385	0.215385	0.284615	0.022901	0.167939	0.412214	0.618321	0.954198	0.015267	0.274809	0.610687	0.80916	1	0.007634	0.244275	0.465649	0.732824	0.992366	0.381679	0.343511	0.274809	0.176923	0.053846	0.007692	0.007634	0.328244	0.549618	0.717557	1	0.175573	0.381679	0.580153	0.80916	0.992366	0.038168	0.099237	0.251908	0.687023	0.916031	0.48855	0.430769	0.030534	0.267176	0.580153	0.78626	0.992366	0.335878
0.290934	0.384303	0.324763	0.210027	0.185637	0.242547	0.008119	0.286874	0.535859	0.742896	0.994587	0.002706	0.236806	0.499323	0.746955	0.997294	0.001353	0.219215	0.461434	0.753721	1	0.462788	0.253045	0.284168	0.097561	0.054201	0	0.001353	0.236806	0.50203	0.691475	1	0.005413	0.231394	0.564276	0.818674	0.97023	0.087957	0.296346	0.396482	0.7023	0.99594	0.543978	0.384824	0.006766	0.219215	0.44249	0.728011	0.99594	0.400541
0.375	0.310268	0.314732	0.203579	0.250559	0.212528	0.006696	0.265625	0.488839	0.794643	1	0.008929	0.234375	0.502232	0.75	0.993304	0.002232	0.279018	0.495536	0.727679	0.997768	0.348214	0.089286	0.5625	0.040268	0.102908	0.004474	0.002232	0.241071	0.524554	0.776786	1	0.051339	0.28125	0.40625	0.53125	0.616071	0.004464	0.245536	0.506696	0.763393	0.993304	0.540179	0.407159	0.004464	0.261161	0.484375	0.694196	0.997768	0.350446
0.336694	0.540323	0.122984	0.335354	0.064646	0.119192	0.006048	0.227823	0.5	0.709677	0.997984	0.008065	0.294355	0.542339	0.754032	1	0.002016	0.080645	0.284274	0.77621	0.969758	0.889113	0.0625	0.048387	0.032323	0.016162	0	0.002016	0.3125	0.53629	0.760081	1	0.018145	0.072581	0.104839	0.157258	0.965726	0.042339	0.052419	0.122984	0.135081	0.945565	0.580645	0.339394	0.016129	0.326613	0.540323	0.747984	0.979839	0.493952
0.361233	0.374449	0.264317	0.286976	0.183223	0.181015	0.008811	0.312775	0.537445	0.797357	1	0.004405	0.202643	0.559471	0.779736	0.997797	0.002203	0.237885	0.389868	0.640969	0.951542	0.493392	0.160793	0.345815	0.06181	0.07064	0.004415	0.002203	0.314978	0.645374	0.876652	1	0.090308	0.286344	0.486784	0.656388	0.768722	0.006608	0.19163	0.376652	0.588106	0.854626	0.508811	0.317881	0.006608	0.200441	0.398678	0.640969	0.852423	0.387665
0.331019	0.354167	0.314815	0.213457	0.232019	0.218097	0.006944	0.226852	0.467593	0.770833	0.99537	0.00463	0.282407	0.50463	0.747685	0.997685	0.002315	0.231481	0.483796	0.722222	1	0.555556	0.24537	0.199074	0.083527	0.041763	0	0.002315	0.256944	0.49537	0.752315	1	0.016204	0.231481	0.400463	0.729167	0.988426	0.043981	0.266204	0.525463	0.696759	0.953704	0.444444	0.37587	0.011574	0.247685	0.497685	0.699074	0.988426	0.347222
0.389091	0.4	0.210909	0.306569	0.160584	0.178832	0.007273	0.269091	0.516364	0.752727	0.996364	0.018182	0.250909	0.505455	0.781818	1	0.003636	0.207273	0.450909	0.614545	0.934545	0.494545	0.072727	0.432727	0.043796	0.072993	0	0.003636	0.163636	0.421818	0.810909	1	0.010909	0.083636	0.178182	0.276364	0.418182	0.12	0.429091	0.6	0.709091	0.930909	0.298182	0.306569	0.010909	0.254545	0.512727	0.647273	0.963636	0.385455
0.339515	0.378031	0.282454	0.25	0.207143	0.202857	0.012839	0.286733	0.510699	0.758916	0.99572	0.002853	0.18117	0.456491	0.724679	1	0.001427	0.300999	0.504993	0.74465	0.998573	0.60485	0.151213	0.243937	0.072857	0.064286	0.001429	0.001427	0.172611	0.413695	0.723252	1	0.108417	0.368046	0.550642	0.850214	0.950071	0.192582	0.356633	0.523538	0.78602	0.998573	0.467903	0.411429	0.008559	0.299572	0.526391	0.764622	0.994294	0.398003
0.330275	0.311927	0.357798	0.203704	0.231481	0.240741	0.045872	0.330275	0.623853	0.770642	1	0.018349	0.192661	0.40367	0.587156	0.972477	0.009174	0.238532	0.440367	0.779817	0.954128	0.376147	0.256881	0.366972	0.083333	0.083333	0.027778	0.009174	0.311927	0.495413	0.87156	1	0.036697	0.091743	0.449541	0.568807	0.844037	0.146789	0.229358	0.642202	0.761468	0.954128	0.458716	0.425926	0.036697	0.211009	0.477064	0.688073	0.954128	0.321101
0.392593	0.325926	0.281481	0.268657	0.238806	0.19403	0.014815	0.162963	0.37037	0.666667	0.992593	0.02963	0.348148	0.6	0.844444	0.977778	0.007407	0.259259	0.533333	0.733333	1	0.348148	0.2	0.451852	0.074627	0.074627	0	0.007407	0.140741	0.451852	0.77037	1	0.318519	0.355556	0.42963	0.511111	0.866667	0.037037	0.192593	0.57037	0.725926	0.962963	0.42963	0.298507	0.022222	0.340741	0.503704	0.8	0.985185	0.340741
0.274648	0.426056	0.299296	0.241623	0.164021	0.268078	0.010563	0.25	0.540493	0.785211	0.996479	0.003521	0.227113	0.43838	0.693662	1	0.001761	0.265845	0.554577	0.767606	0.984155	0.651408	0.109155	0.239437	0.05291	0.059965	0.003527	0.001761	0.205986	0.415493	0.679577	1	0.179577	0.602113	0.72007	0.816901	0.984155	0.010563	0.278169	0.579225	0.859155	0.975352	0.514085	0.388007	0.005282	0.271127	0.498239	0.762324	0.984155	0.478873
0.447248	0.302752	0.25	0.275862	0.232184	0.147126	0.006881	0.197248	0.479358	0.777523	1	0.004587	0.28211	0.493119	0.745413	0.993119	0.002294	0.307339	0.534404	0.71789	0.997706	0.525229	0.055046	0.419725	0.034483	0.108046	0.006897	0.002294	0.231651	0.538991	0.766055	1	0.043578	0.208716	0.341743	0.555046	0.84633	0.055046	0.279817	0.493119	0.71789	0.995413	0.366972	0.395402	0.041284	0.34633	0.555046	0.745413	0.990826	0.330275
0.459854	0.29781	0.242336	0.247076	0.192982	0.168129	0.00292	0.265693	0.49635	0.770803	1	0.005839	0.251095	0.50219	0.728467	0.99708	0.00146	0.227737	0.490511	0.713869	0.986861	0.477372	0.191241	0.331387	0.068713	0.065789	0.004386	0.00146	0.205839	0.437956	0.716788	1	0.039416	0.256934	0.465693	0.681752	0.932847	0.056934	0.331387	0.629197	0.835036	0.99562	0.410219	0.330409	0.014599	0.258394	0.464234	0.684672	0.986861	0.359124
0.338721	0.334007	0.327273	0.227763	0.229784	0.218329	0.00404	0.244444	0.481481	0.727273	1	0.001347	0.288215	0.546801	0.800673	0.999327	0.000673	0.206734	0.459259	0.724579	0.986532	0.420875	0.108418	0.470707	0.039757	0.09097	0.003369	0.000673	0.356902	0.549495	0.798653	1	0.006061	0.381145	0.522559	0.76431	0.986532	0.010101	0.156229	0.343434	0.678788	0.989899	0.523906	0.373315	0.006734	0.241751	0.485522	0.734007	0.996633	0.33064
0.321321	0.357357	0.321321	0.192771	0.192771	0.262048	0.021021	0.234234	0.432432	0.747748	0.984985	0.006006	0.231231	0.522523	0.78979	1	0.003003	0.255255	0.498498	0.693694	0.993994	0.414414	0.048048	0.537538	0.018072	0.108434	0.006024	0.003003	0.189189	0.525526	0.798799	1	0.537538	0.774775	0.813814	0.825826	0.843844	0.006006	0.264264	0.462462	0.645646	0.984985	0.438438	0.403614	0.012012	0.264264	0.495495	0.696697	0.978979	0.372372
0.330218	0.317757	0.352025	0.2	0.24375	0.203125	0.015576	0.224299	0.498442	0.750779	0.996885	0.018692	0.333333	0.548287	0.728972	1	0.003115	0.211838	0.464174	0.753894	0.990654	0.501558	0.267913	0.23053	0.10625	0.05625	0.00625	0.003115	0.246106	0.523364	0.772586	1	0.012461	0.274143	0.47352	0.672897	0.94704	0.037383	0.115265	0.495327	0.862928	0.993769	0.510903	0.38125	0.012461	0.327103	0.529595	0.747664	0.990654	0.271028
0.435233	0.259067	0.305699	0.203125	0.291667	0.192708	0.015544	0.259067	0.502591	0.772021	1	0.010363	0.176166	0.435233	0.694301	0.984456	0.005181	0.248705	0.507772	0.73057	0.994819	0.455959	0.450777	0.093264	0.125	0.03125	0	0.005181	0.274611	0.580311	0.854922	1	0.015544	0.305699	0.492228	0.65285	0.906736	0.07772	0.093264	0.227979	0.248705	0.683938	0.42487	0.458333	0.025907	0.284974	0.46114	0.694301	0.911917	0.26943
0.38512	0.404814	0.210066	0.287281	0.138158	0.164474	0.015317	0.253829	0.553611	0.809628	0.997812	0.004376	0.214442	0.424508	0.676149	0.995624	0.002188	0.280088	0.586433	0.78337	1	0.713348	0.111597	0.175055	0.046053	0.054825	0.002193	0.002188	0.196937	0.43326	0.676149	1	0.054705	0.284464	0.628009	0.770241	0.908096	0.155361	0.514223	0.665208	0.822757	0.967177	0.367615	0.29386	0.006565	0.245077	0.420131	0.704595	0.967177	0.428884
0.342857	0.409524	0.247619	0.259615	0.163462	0.192308	0.019048	0.180952	0.409524	0.628571	0.990476	0.028571	0.228571	0.485714	0.761905	1	0.009524	0.285714	0.561905	0.771429	0.961905	0.485714	0.047619	0.466667	0.038462	0.115385	0	0.009524	0.2	0.4	0.847619	1	0.295238	0.295238	0.304762	0.942857	0.961905	0.038095	0.257143	0.542857	0.714286	0.838095	0.361905	0.307692	0.057143	0.371429	0.714286	0.8	0.961905	0.361905
0.424528	0.358491	0.216981	0.285714	0.171429	0.161905	0.028302	0.198113	0.396226	0.613208	0.877358	0.018868	0.301887	0.622642	0.773585	1	0.009434	0.226415	0.518868	0.801887	0.981132	0.273585	0	0.726415	0	0.057143	0	0.009434	0.066038	0.669811	0.924528	1	0	0	0	0	0	0.084906	0.254717	0.462264	0.641509	0.896226	0.292453	0.361905	0.226415	0.386792	0.59434	0.801887	0.962264	0.349057
0.304348	0.481884	0.213768	0.341818	0.123636	0.192727	0.01087	0.231884	0.492754	0.807971	0.978261	0.007246	0.26087	0.543478	0.789855	1	0.003623	0.23913	0.405797	0.586957	0.869565	0.344203	0.083333	0.572464	0.043636	0.101818	0	0.003623	0.166667	0.442029	0.793478	1	0.413043	0.706522	0.75	0.778986	0.98913	0.050725	0.26087	0.467391	0.637681	0.931159	0.445652	0.334545	0.050725	0.23913	0.416667	0.630435	0.981884	0.48913
0.316857	0.290241	0.392902	0.182741	0.27665	0.248731	0.002535	0.268695	0.52218	0.754119	0.997465	0.00507	0.226869	0.484157	0.740177	0.998733	0.001267	0.253485	0.498099	0.742712	1	0.463878	0.240811	0.295311	0.098985	0.060914	0.002538	0.001267	0.206591	0.447402	0.746515	1	0.03929	0.200253	0.423321	0.797212	0.997465	0.006337	0.323194	0.542459	0.700887	0.989861	0.57161	0.385787	0.003802	0.268695	0.47782	0.740177	0.996198	0.342205
0.37	0.31	0.32	0.20202	0.262626	0.191919	0.1	0.24	0.47	0.69	0.98	0.03	0.21	0.53	0.83	1	0.01	0.22	0.41	0.68	0.97	0.46	0.54	0	0.181818	0	0	0.01	0.3	0.53	0.79	1	0.02	0.19	0.39	0.68	0.96	0	0	0	0	0	0.36	0.505051	0.02	0.2	0.42	0.7	0.97	0.24
0.35274	0.344178	0.303082	0.272727	0.221269	0.185249	0.003425	0.217466	0.479452	0.743151	0.993151	0.005137	0.191781	0.453767	0.707192	1	0.001712	0.325342	0.535959	0.773973	0.998288	0.530822	0.150685	0.318493	0.060034	0.073756	0.005146	0.001712	0.133562	0.318493	0.667808	1	0.008562	0.481164	0.631849	0.828767	0.962329	0.212329	0.412671	0.571918	0.77911	0.989726	0.496575	0.367067	0.005137	0.32363	0.501712	0.743151	0.994863	0.34589
0.310734	0.449153	0.240113	0.246459	0.144476	0.229462	0.011299	0.288136	0.545198	0.740113	0.99435	0.00565	0.180791	0.432203	0.757062	0.988701	0.002825	0.327684	0.522599	0.725989	1	0.615819	0.186441	0.19774	0.073654	0.045326	0	0.002825	0.158192	0.381356	0.793785	1	0.149718	0.426554	0.536723	0.677966	0.813559	0.262712	0.403955	0.632768	0.757062	0.963277	0.548023	0.322946	0.008475	0.206215	0.488701	0.748588	0.997175	0.440678
0.333938	0.402904	0.263158	0.250909	0.158182	0.229091	0.012704	0.212341	0.508167	0.818512	1	0.00363	0.205082	0.442831	0.716878	0.99637	0.001815	0.321234	0.513612	0.718693	0.970962	0.502722	0.136116	0.361162	0.049091	0.074545	0.005455	0.001815	0.127042	0.366606	0.744102	1	0.168784	0.411978	0.560799	0.720508	0.811252	0.110708	0.346642	0.540835	0.814882	0.958258	0.473684	0.330909	0.005445	0.297641	0.470054	0.693285	0.990926	0.444646
0.314425	0.463533	0.222042	0.26461	0.157468	0.194805	0.006483	0.222042	0.505673	0.748784	0.996759	0.003241	0.269044	0.47812	0.724473	1	0.001621	0.241491	0.547812	0.777958	0.998379	0.654781	0.029173	0.316045	0.025974	0.061688	0	0.001621	0.314425	0.518639	0.750405	1	0.009724	0.320908	0.52188	0.696921	0.820097	0.06483	0.19611	0.354943	0.893031	0.990276	0.486224	0.373377	0.009724	0.291734	0.606159	0.771475	0.983793	0.494327
0.445545	0.277228	0.277228	0.25	0.26	0.11	0.019802	0.247525	0.534653	0.772277	1	0.029703	0.277228	0.435644	0.663366	0.980198	0.009901	0.217822	0.425743	0.752475	0.910891	0.366337	0.306931	0.326733	0.11	0.05	0.01	0.009901	0.326733	0.475248	0.80198	1	0.039604	0.09901	0.49505	0.623762	0.920792	0.158416	0.227723	0.306931	0.752475	0.871287	0.475248	0.42	0.039604	0.227723	0.49505	0.722772	0.930693	0.29703
0.300752	0.330827	0.368421	0.212121	0.181818	0.242424	0.045113	0.263158	0.443609	0.646617	0.954887	0.015038	0.225564	0.578947	0.774436	0.947368	0.007519	0.24812	0.458647	0.744361	1	0.353383	0.360902	0.285714	0.174242	0.05303	0.007576	0.007519	0.330827	0.56391	0.729323	1	0.18797	0.398496	0.541353	0.81203	0.992481	0.037594	0.097744	0.255639	0.323308	0.917293	0.466165	0.424242	0.030075	0.233083	0.556391	0.789474	0.992481	0.293233
0.35443	0.386076	0.259494	0.299363	0.197452	0.203822	0.025316	0.183544	0.525316	0.746835	0.993671	0.056962	0.234177	0.405063	0.727848	1	0.006329	0.303797	0.531646	0.721519	0.93038	0.575949	0.189873	0.234177	0.076433	0.038217	0.012739	0.006329	0.14557	0.322785	0.468354	1	0.28481	0.481013	0.702532	0.778481	0.936709	0.031646	0.537975	0.594937	0.848101	0.974684	0.481013	0.343949	0.101266	0.310127	0.487342	0.71519	0.955696	0.360759
0.28551	0.392577	0.321913	0.234286	0.175714	0.248571	0.001428	0.290507	0.508922	0.758744	0.996431	0.002855	0.231263	0.473947	0.73733	0.999286	0.000714	0.243398	0.517488	0.750178	1	0.539615	0.373305	0.087081	0.117143	0.027143	0.004286	0.000714	0.24768	0.484654	0.721627	1	0.002141	0.227695	0.492505	0.744468	0.93576	0.033547	0.321199	0.660956	0.958601	0.995004	0.610992	0.29	0.002141	0.255532	0.523911	0.753747	0.998572	0.427552
0.450704	0.232394	0.316901	0.184397	0.297872	0.156028	0.014085	0.225352	0.43662	0.739437	0.992958	0.021127	0.302817	0.549296	0.802817	0.957746	0.007042	0.21831	0.507042	0.690141	1	0.232394	0	0.767606	0	0.12766	0	0.007042	0.260563	0.5	0.690141	1	0	0	0	0	0	0.028169	0.239437	0.464789	0.746479	0.978873	0.535211	0.368794	0.035211	0.302817	0.521127	0.71831	0.922535	0.260563
0.378738	0.285714	0.335548	0.22	0.223333	0.18	0.006645	0.302326	0.601329	0.797342	1	0.009967	0.182724	0.405316	0.611296	0.983389	0.003322	0.249169	0.495017	0.717608	0.980066	0.418605	0.229236	0.352159	0.08	0.066667	0	0.003322	0.189369	0.481728	0.69103	1	0.013289	0.162791	0.398671	0.747508	0.923588	0.059801	0.352159	0.551495	0.807309	0.963455	0.55814	0.346667	0.016611	0.219269	0.45515	0.707641	0.976744	0.292359
0.352181	0.318255	0.329564	0.223301	0.221683	0.197411	0.008078	0.232633	0.516963	0.77706	1	0.006462	0.197092	0.439418	0.736672	0.996769	0.001616	0.311793	0.53958	0.731826	0.983845	0.49273	0.163166	0.344103	0.063107	0.079288	0.004854	0.001616	0.159935	0.336026	0.647819	1	0.009693	0.308562	0.568659	0.728595	0.886914	0.077544	0.415186	0.599354	0.817447	0.995153	0.508885	0.355987	0.009693	0.345719	0.523425	0.731826	0.988691	0.360258
0.411111	0.288889	0.3	0.258427	0.247191	0.191011	0.055556	0.266667	0.544444	0.788889	1	0.022222	0.177778	0.377778	0.611111	0.988889	0.011111	0.277778	0.477778	0.744444	0.966667	0.277778	0	0.722222	0	0.089888	0	0.011111	0.177778	0.244444	0.544444	1	0	0	0	0	0	0.055556	0.333333	0.566667	0.744444	0.944444	0.4	0.449438	0.033333	0.311111	0.477778	0.733333	0.966667	0.288889
0.455285	0.235772	0.308943	0.196721	0.270492	0.180328	0.01626	0.211382	0.463415	0.723577	1	0.121951	0.349593	0.569106	0.756098	0.97561	0.00813	0.235772	0.512195	0.674797	0.99187	0.365854	0.219512	0.414634	0.081967	0.114754	0	0.00813	0.284553	0.569106	0.747967	1	0.170732	0.235772	0.341463	0.666667	0.98374	0.03252	0.146341	0.495935	0.756098	0.861789	0.447154	0.360656	0.056911	0.333333	0.487805	0.682927	0.97561	0.227642
0.283978	0.447514	0.268508	0.21792	0.18031	0.220133	0.00884	0.232044	0.436464	0.674033	0.998895	0.003315	0.278453	0.59558	0.777901	0.996685	0.001105	0.227624	0.427624	0.687293	1	0.60663	0.124862	0.268508	0.063053	0.058628	0.003319	0.001105	0.303867	0.59116	0.776796	1	0.029834	0.19337	0.324862	0.470718	0.814365	0.00442	0.21326	0.38895	0.767956	0.956906	0.483978	0.435841	0.00442	0.296133	0.569061	0.775691	0.99116	0.443094
0.37415	0.401361	0.22449	0.219178	0.164384	0.19863	0.034014	0.231293	0.380952	0.571429	0.993197	0.013605	0.204082	0.653061	0.816327	1	0.006803	0.272109	0.455782	0.646259	0.904762	0.517007	0.040816	0.442177	0.027397	0.041096	0	0.006803	0.571429	0.721088	0.85034	1	0.659864	0.659864	0.673469	0.891156	0.904762	0.034014	0.204082	0.312925	0.428571	0.544218	0.333333	0.369863	0.047619	0.272109	0.482993	0.673469	0.904762	0.414966
0.38125	0.375	0.24375	0.272727	0.194357	0.216301	0.015625	0.25	0.475	0.725	1	0.00625	0.2375	0.534375	0.771875	0.996875	0.003125	0.225	0.48125	0.759375	0.98125	0.60625	0.215625	0.178125	0.068966	0.056426	0	0.003125	0.196875	0.51875	0.69375	1	0.18125	0.259375	0.409375	0.84375	0.98125	0.0375	0.296875	0.459375	0.8	0.9375	0.390625	0.363636	0.01875	0.3	0.53125	0.76875	0.98125	0.4375
0.393443	0.360656	0.245902	0.366667	0.166667	0.15	0.04918	0.213115	0.459016	0.737705	0.967213	0.032787	0.163934	0.327869	0.606557	1	0.016393	0.42623	0.672131	0.770492	0.934426	0.639344	0.016393	0.344262	0.033333	0.1	0	0.016393	0.147541	0.360656	0.540984	1	0.442623	0.442623	0.442623	0.442623	0.442623	0.278689	0.590164	0.704918	0.786885	0.885246	0.311475	0.366667	0.344262	0.47541	0.655738	0.770492	0.934426	0.442623
0.405882	0.317647	0.276471	0.289941	0.236686	0.171598	0.011765	0.294118	0.505882	0.776471	1	0.076471	0.235294	0.511765	0.705882	0.988235	0.005882	0.123529	0.441176	0.682353	0.911765	0.370588	0.282353	0.347059	0.118343	0.059172	0.011834	0.005882	0.135294	0.517647	0.735294	1	0.011765	0.217647	0.541176	0.770588	0.858824	0.147059	0.294118	0.382353	0.594118	0.976471	0.352941	0.43787	0.017647	0.182353	0.488235	0.682353	0.911765	0.376471
0.333333	0.373984	0.292683	0.270492	0.172131	0.262295	0.02439	0.219512	0.422764	0.682927	0.99187	0.03252	0.243902	0.552846	0.780488	1	0.00813	0.317073	0.528455	0.764228	0.98374	0.235772	0	0.764228	0	0.081967	0	0.00813	0.056911	0.227642	0.715447	1	0	0	0	0	0	0.065041	0.300813	0.495935	0.764228	0.97561	0.430894	0.459016	0.03252	0.325203	0.528455	0.739837	0.95122	0.349593
0.363636	0.290909	0.345455	0.259259	0.314815	0.222222	0.036364	0.272727	0.490909	0.745455	1	0.145455	0.254545	0.527273	0.690909	0.890909	0.018182	0.109091	0.418182	0.781818	0.963636	0.418182	0.236364	0.345455	0.092593	0.074074	0	0.109091	0.181818	0.472727	0.654545	1	0.018182	0.054545	0.563636	0.618182	0.981818	0.254545	0.309091	0.4	0.745455	0.836364	0.327273	0.444444	0.054545	0.290909	0.454545	0.8	0.963636	0.309091
0.344942	0.33665	0.318408	0.242525	0.232558	0.200997	0.021559	0.271973	0.474295	0.752902	0.996683	0.004975	0.189055	0.45937	0.721393	1	0.001658	0.283582	0.560531	0.78607	0.998342	0.532338	0.140962	0.3267	0.053156	0.066445	0.006645	0.001658	0.15257	0.344942	0.648425	1	0.238806	0.504146	0.681592	0.817579	0.961857	0.013267	0.361526	0.595357	0.792703	0.995025	0.547264	0.352159	0.00995	0.320066	0.533997	0.756219	0.993367	0.353234
0.344	0.31	0.346	0.208417	0.272545	0.218437	0.018	0.234	0.462	0.758	0.998	0.004	0.246	0.492	0.722	1	0.002	0.268	0.526	0.742	0.996	0.344	0.1	0.556	0.044088	0.108216	0.004008	0.002	0.198	0.41	0.664	1	0.008	0.176	0.224	0.296	0.996	0.014	0.398	0.59	0.79	0.984	0.548	0.44489	0.004	0.27	0.476	0.728	0.996	0.324
0.347826	0.336957	0.315217	0.230769	0.208791	0.197802	0.054348	0.195652	0.423913	0.836957	0.978261	0.021739	0.391304	0.630435	0.76087	1	0.01087	0.184783	0.347826	0.608696	0.804348	0.467391	0.358696	0.173913	0.10989	0.043956	0.021978	0.01087	0.315217	0.73913	0.880435	1	0.25	0.369565	0.48913	0.597826	0.782609	0.032609	0.108696	0.152174	0.195652	0.663043	0.456522	0.285714	0.097826	0.293478	0.456522	0.630435	0.793478	0.293478
0.338028	0.352113	0.309859	0.240566	0.25	0.245283	0.023474	0.258216	0.488263	0.807512	0.985915	0.014085	0.267606	0.507042	0.760563	1	0.004695	0.192488	0.469484	0.694836	0.995305	0.464789	0.375587	0.159624	0.160377	0.018868	0	0.004695	0.169014	0.422535	0.802817	1	0.065728	0.248826	0.389671	0.694836	0.971831	0.441315	0.474178	0.516432	0.821596	0.86385	0.474178	0.490566	0.018779	0.183099	0.492958	0.666667	0.957746	0.361502
0.349315	0.303653	0.347032	0.19222	0.26087	0.185355	0.004566	0.260274	0.520548	0.757991	0.995434	0.011416	0.194064	0.477169	0.746575	1	0.002283	0.276256	0.486301	0.737443	0.997717	0.420091	0.196347	0.383562	0.070938	0.070938	0.006865	0.002283	0.180365	0.474886	0.780822	1	0.020548	0.321918	0.543379	0.762557	0.881279	0.077626	0.269406	0.465753	0.730594	0.954338	0.563927	0.338673	0.009132	0.255708	0.461187	0.737443	0.997717	0.305936
0.38125	0.425	0.19375	0.319415	0.14405	0.179541	0.008333	0.241667	0.522917	0.745833	0.997917	0.00625	0.24375	0.466667	0.785417	1	0.002083	0.2625	0.464583	0.689583	0.975	0.604167	0.122917	0.272917	0.056367	0.08977	0.002088	0.002083	0.2125	0.41875	0.7625	1	0.01875	0.139583	0.275	0.570833	0.70625	0.0375	0.460417	0.63125	0.79375	0.977083	0.466667	0.338205	0.01875	0.297917	0.535417	0.74375	0.985417	0.452083
0.364094	0.336409	0.299497	0.225021	0.207389	0.214945	0.002517	0.213926	0.472315	0.745805	1	0.001678	0.246644	0.511745	0.732383	0.997483	0.000839	0.290268	0.538591	0.77349	0.993289	0.416107	0.156879	0.427013	0.055416	0.078925	0.001679	0.000839	0.202181	0.473993	0.744128	1	0.003356	0.315436	0.462248	0.59396	0.908557	0.006711	0.265101	0.529362	0.759228	0.987416	0.505872	0.327456	0.008389	0.32802	0.543624	0.765101	0.990772	0.360738
0.345882	0.32	0.334118	0.205189	0.252358	0.214623	0.009412	0.24	0.510588	0.767059	0.995294	0.004706	0.2	0.416471	0.734118	0.992941	0.002353	0.310588	0.536471	0.748235	1	0.432941	0.178824	0.388235	0.075472	0.080189	0.004717	0.002353	0.141176	0.44	0.687059	1	0.091765	0.407059	0.625882	0.814118	0.929412	0.070588	0.265882	0.505882	0.736471	0.997647	0.56	0.358491	0.016471	0.289412	0.494118	0.755294	0.990588	0.371765
0.4	0.314286	0.285714	0.318841	0.246377	0.173913	0.042857	0.342857	0.642857	0.828571	1	0.028571	0.171429	0.442857	0.628571	0.985714	0.014286	0.142857	0.414286	0.614286	0.9	0.457143	0.171429	0.371429	0.144928	0.086957	0	0.014286	0.157143	0.342857	0.628571	1	0.042857	0.085714	0.3	0.414286	0.457143	0.5	0.571429	0.785714	0.871429	0.971429	0.357143	0.434783	0.057143	0.214286	0.328571	0.571429	0.9	0.342857
0.328829	0.405405	0.265766	0.289593	0.199095	0.180995	0.009009	0.202703	0.382883	0.693694	0.995495	0.045045	0.333333	0.536036	0.765766	0.990991	0.004505	0.13964	0.513514	0.734234	1	0.445946	0.211712	0.342342	0.095023	0.085973	0.004525	0.004505	0.333333	0.603604	0.837838	1	0.009009	0.162162	0.414414	0.612613	0.936937	0.040541	0.243243	0.328829	0.689189	0.986486	0.364865	0.41629	0.013514	0.198198	0.445946	0.68018	0.986486	0.423423
0.423913	0.336957	0.23913	0.351648	0.186813	0.175824	0.032609	0.195652	0.434783	0.728261	1	0.021739	0.173913	0.413043	0.695652	0.934783	0.01087	0.358696	0.521739	0.804348	0.978261	0.597826	0.032609	0.369565	0.043956	0.043956	0	0.01087	0.141304	0.293478	0.554348	1	0.380435	0.380435	0.380435	0.391304	0.586957	0.445652	0.521739	0.782609	0.869565	0.967391	0.358696	0.395604	0.130435	0.434783	0.597826	0.804348	0.934783	0.347826
0.366154	0.307692	0.326154	0.240741	0.216049	0.222222	0.009231	0.283077	0.523077	0.766154	0.996923	0.006154	0.193846	0.387692	0.72	0.987692	0.003077	0.298462	0.498462	0.741538	1	0.436923	0.218462	0.344615	0.074074	0.067901	0	0.003077	0.190769	0.455385	0.704615	1	0.092308	0.230769	0.44	0.753846	0.938462	0.024615	0.387692	0.578462	0.827692	0.975385	0.532308	0.32716	0.024615	0.258462	0.486154	0.726154	0.987692	0.326154
0.351485	0.361386	0.287129	0.278607	0.243781	0.208955	0.019802	0.222772	0.480198	0.782178	1	0.009901	0.277228	0.559406	0.767327	0.99505	0.00495	0.237624	0.450495	0.678218	0.990099	0.415842	0.39604	0.188119	0.124378	0.064677	0.004975	0.00495	0.282178	0.584158	0.806931	1	0.009901	0.29703	0.445545	0.633663	0.886139	0.079208	0.222772	0.559406	0.782178	0.990099	0.420792	0.457711	0.014851	0.242574	0.445545	0.663366	0.89604	0.361386
0.311321	0.367925	0.320755	0.227488	0.232227	0.246445	0.014151	0.264151	0.495283	0.787736	1	0.009434	0.193396	0.433962	0.75	0.990566	0.004717	0.311321	0.5	0.693396	0.957547	0.466981	0.386792	0.146226	0.137441	0.052133	0.004739	0.004717	0.212264	0.580189	0.820755	1	0.037736	0.306604	0.457547	0.636792	0.962264	0.108491	0.136792	0.273585	0.650943	0.910377	0.415094	0.454976	0.037736	0.264151	0.457547	0.683962	0.957547	0.386792
0.325279	0.330855	0.343866	0.212291	0.208566	0.264432	0.003717	0.202602	0.44052	0.672862	0.996283	0.007435	0.273234	0.539033	0.769517	0.992565	0.001859	0.258364	0.522305	0.767658	1	0.414498	0.072491	0.513011	0.031657	0.094972	0.001862	0.001859	0.262082	0.574349	0.79368	1	0.042751	0.087361	0.765799	0.86803	0.964684	0.007435	0.234201	0.436803	0.6171	0.992565	0.581784	0.387337	0.009294	0.245353	0.520446	0.767658	0.992565	0.355019
0.379015	0.375803	0.245182	0.285102	0.181136	0.180064	0.003212	0.310493	0.594218	0.804069	1	0.002141	0.233405	0.475375	0.755889	0.994647	0.001071	0.223769	0.421842	0.624197	0.981799	0.541756	0.114561	0.343683	0.049303	0.085745	0.004287	0.001071	0.182013	0.533191	0.771949	1	0.093148	0.266595	0.431478	0.656317	0.87152	0.108137	0.283726	0.518201	0.680942	0.996788	0.395075	0.323687	0.005353	0.218415	0.404711	0.583512	0.979657	0.404711
0.368864	0.417952	0.213184	0.280899	0.151685	0.161517	0.002805	0.235624	0.429173	0.667602	0.998597	0.004208	0.290323	0.608696	0.810659	1	0.001403	0.231417	0.464236	0.681627	0.997195	0.706872	0.145863	0.147265	0.075843	0.047753	0	0.001403	0.308555	0.605891	0.786816	1	0.00561	0.224404	0.352034	0.546985	0.995792	0.02805	0.15568	0.269285	0.509116	0.848527	0.45021	0.33427	0.007013	0.339411	0.628331	0.812062	0.99439	0.415147
0.376623	0.285714	0.337662	0.200521	0.265625	0.195312	0.005195	0.184416	0.418182	0.724675	1	0.023377	0.335065	0.522078	0.742857	0.98961	0.002597	0.212987	0.501299	0.753247	0.997403	0.371429	0.228571	0.4	0.088542	0.072917	0	0.002597	0.288312	0.480519	0.792208	1	0.01039	0.187013	0.387013	0.607792	0.994805	0.051948	0.238961	0.581818	0.768831	0.979221	0.602597	0.411458	0.01039	0.301299	0.509091	0.742857	0.997403	0.322078
0.291405	0.395528	0.313068	0.228671	0.18951	0.246853	0.004193	0.30608	0.520615	0.762404	0.995807	0.001398	0.238994	0.51153	0.735849	0.998602	0.000699	0.228512	0.454228	0.748428	1	0.538784	0.374563	0.086653	0.11958	0.031469	0.006294	0.000699	0.255066	0.508036	0.716981	1	0.019567	0.236198	0.469602	0.75891	0.937806	0.002795	0.17051	0.590496	0.960867	0.998602	0.591195	0.28951	0.002795	0.238994	0.482879	0.763103	0.997904	0.42348
0.344538	0.367647	0.287815	0.242105	0.2	0.185263	0.004202	0.25	0.476891	0.743697	0.995798	0.008403	0.228992	0.491597	0.726891	1	0.002101	0.258403	0.537815	0.773109	0.968487	0.558824	0.197479	0.243697	0.067368	0.054737	0	0.002101	0.231092	0.497899	0.741597	1	0.056723	0.210084	0.409664	0.82563	0.968487	0.079832	0.359244	0.548319	0.75	0.995798	0.47479	0.353684	0.014706	0.310924	0.533613	0.756303	0.970588	0.380252
0.377892	0.401028	0.22108	0.31701	0.164948	0.167526	0.012853	0.241645	0.462725	0.676093	1	0.005141	0.287918	0.529563	0.745501	0.982005	0.002571	0.190231	0.496144	0.794344	0.997429	0.706941	0.100257	0.192802	0.051546	0.072165	0.015464	0.002571	0.22365	0.421594	0.696658	1	0.007712	0.208226	0.51671	0.820051	0.987147	0.069409	0.478149	0.670951	0.861183	0.992288	0.352185	0.28866	0.010283	0.210797	0.467866	0.760925	0.997429	0.413882
0.369892	0.331183	0.298925	0.243534	0.226293	0.193966	0.008602	0.230108	0.492473	0.8	0.993548	0.006452	0.268817	0.505376	0.731183	1	0.002151	0.232258	0.47957	0.703226	0.948387	0.384946	0.083871	0.531183	0.036638	0.105603	0.002155	0.002151	0.221505	0.391398	0.780645	1	0.064516	0.176344	0.251613	0.313978	0.417204	0.006452	0.402151	0.591398	0.76129	0.948387	0.541935	0.362069	0.004301	0.260215	0.47957	0.703226	0.948387	0.344086
0.337004	0.328194	0.334802	0.205298	0.249448	0.161148	0.004405	0.222467	0.484581	0.753304	0.995595	0.011013	0.242291	0.486784	0.735683	0.977974	0.002203	0.277533	0.513216	0.757709	1	0.400881	0.185022	0.414097	0.066225	0.083885	0.004415	0.002203	0.26652	0.497797	0.746696	1	0.11674	0.273128	0.647577	0.770925	0.955947	0.017621	0.209251	0.451542	0.702643	0.997797	0.544053	0.401766	0.015419	0.277533	0.480176	0.711454	0.991189	0.348018
0.315789	0.404719	0.279492	0.249091	0.14	0.229091	0.00726	0.288566	0.529946	0.76588	0.998185	0.00363	0.206897	0.482759	0.745917	1	0.001815	0.284936	0.491833	0.725953	0.99637	0.433757	0.163339	0.402904	0.061818	0.087273	0.003636	0.001815	0.217786	0.479129	0.758621	1	0.058076	0.348457	0.566243	0.68784	0.994555	0.029038	0.23412	0.466425	0.722323	0.981851	0.526316	0.363636	0.009074	0.259528	0.45735	0.693285	0.99637	0.421053
0.328592	0.361309	0.3101	0.270655	0.19943	0.252137	0.008535	0.28734	0.524893	0.780939	0.995733	0.002845	0.201991	0.450925	0.69559	1	0.001422	0.27596	0.523471	0.761024	0.998578	0.409673	0.186344	0.403983	0.086895	0.066952	0.007123	0.001422	0.302987	0.499289	0.796586	1	0.009957	0.186344	0.418208	0.890469	0.997155	0.032717	0.278805	0.550498	0.687055	0.927454	0.536273	0.378917	0.01138	0.26458	0.480797	0.708393	0.998578	0.376956
0.423729	0.378531	0.19774	0.335227	0.102273	0.1875	0.028249	0.231638	0.564972	0.841808	1	0.011299	0.214689	0.457627	0.689266	0.99435	0.00565	0.265537	0.435028	0.632768	0.943503	0.463277	0.259887	0.276836	0.073864	0.039773	0.017045	0.00565	0.112994	0.367232	0.553672	1	0.146893	0.265537	0.435028	0.717514	0.80226	0.220339	0.570621	0.644068	0.887006	0.960452	0.446328	0.306818	0.016949	0.271186	0.451977	0.694915	0.943503	0.367232
0.362218	0.402946	0.234835	0.296618	0.155247	0.187337	0.0026	0.282496	0.577123	0.790295	1	0.001733	0.22357	0.511265	0.761698	0.999133	0.000867	0.237435	0.422877	0.630849	0.966205	0.506066	0.116118	0.377816	0.049436	0.085863	0.004337	0.000867	0.185442	0.52513	0.793761	1	0.016464	0.292894	0.409879	0.681976	0.886482	0.003466	0.281629	0.541594	0.70104	0.988735	0.444541	0.348656	0.003466	0.218371	0.414211	0.665511	0.966205	0.443674
0.366038	0.320755	0.313208	0.265152	0.208333	0.204545	0.007547	0.264151	0.539623	0.754717	1	0.011321	0.203774	0.430189	0.701887	0.984906	0.003774	0.260377	0.471698	0.732075	0.981132	0.388679	0.090566	0.520755	0.034091	0.102273	0.003788	0.003774	0.09434	0.34717	0.74717	1	0.211321	0.777358	0.826415	0.849057	0.879245	0.109434	0.309434	0.49434	0.645283	0.988679	0.498113	0.363636	0.022642	0.279245	0.471698	0.698113	0.981132	0.335849
0.400283	0.404526	0.195191	0.303116	0.148725	0.11898	0.004243	0.280057	0.437058	0.704385	1	0.002829	0.186704	0.424328	0.721358	0.998586	0.001414	0.490806	0.681754	0.838755	0.984441	0.591231	0.11174	0.29703	0.048159	0.073654	0.008499	0.001414	0.248939	0.408769	0.653465	1	0.015559	0.509194	0.623762	0.717115	0.902405	0.008487	0.189533	0.660537	0.826025	0.988685	0.417256	0.29745	0.009901	0.492221	0.663366	0.820368	0.990099	0.473833
0.291005	0.407407	0.301587	0.251989	0.180371	0.246684	0.021164	0.261905	0.513228	0.730159	1	0.005291	0.195767	0.462963	0.756614	0.992063	0.002646	0.280423	0.521164	0.732804	0.997354	0.410053	0.156085	0.433862	0.066313	0.082228	0.007958	0.002646	0.190476	0.399471	0.777778	1	0.121693	0.283069	0.420635	0.558201	0.796296	0.005291	0.320106	0.600529	0.759259	0.994709	0.595238	0.366048	0.007937	0.301587	0.560847	0.759259	0.997354	0.412698
0.328904	0.328904	0.342193	0.203333	0.25	0.216667	0.023256	0.252492	0.451827	0.780731	0.993355	0.009967	0.196013	0.481728	0.727575	0.990033	0.003322	0.259136	0.531561	0.754153	1	0.375415	0.17608	0.448505	0.053333	0.106667	0	0.003322	0.212625	0.461794	0.717608	1	0.149502	0.302326	0.481728	0.677741	0.767442	0.013289	0.252492	0.541528	0.843854	0.996678	0.548173	0.426667	0.006645	0.23588	0.498339	0.684385	0.990033	0.328904
0.42602	0.318878	0.255102	0.273657	0.255754	0.150895	0.005102	0.298469	0.528061	0.719388	1	0.012755	0.191327	0.461735	0.778061	0.997449	0.002551	0.242347	0.459184	0.762755	0.984694	0.443878	0.114796	0.441327	0.066496	0.056266	0.01023	0.002551	0.265306	0.520408	0.831633	1	0.012755	0.403061	0.788265	0.857143	0.987245	0.109694	0.227041	0.346939	0.630102	0.956633	0.298469	0.378517	0.010204	0.178571	0.390306	0.72449	0.984694	0.352041
0.305668	0.502024	0.192308	0.273834	0.133874	0.188641	0.006073	0.261134	0.530364	0.730769	1	0.004049	0.248988	0.481781	0.740891	0.993927	0.002024	0.226721	0.51417	0.765182	0.997976	0.732794	0.058704	0.208502	0.032454	0.064909	0.008114	0.002024	0.202429	0.502024	0.757085	1	0.115385	0.483806	0.665992	0.807692	0.995951	0.109312	0.259109	0.319838	0.591093	0.965587	0.508097	0.267748	0.016194	0.291498	0.508097	0.805668	0.997976	0.45749
0.384236	0.197044	0.418719	0.108911	0.341584	0.188119	0.014778	0.275862	0.541872	0.719212	1	0.009852	0.157635	0.55665	0.827586	0.940887	0.004926	0.236453	0.438424	0.694581	0.970443	0.359606	0.246305	0.394089	0.089109	0.059406	0.009901	0.004926	0.128079	0.472906	0.82266	1	0.049261	0.275862	0.384236	0.729064	0.970443	0.133005	0.226601	0.55665	0.655172	0.8867	0.551724	0.475248	0.024631	0.256158	0.517241	0.753695	0.970443	0.167488
0.354535	0.285041	0.360424	0.193396	0.246462	0.205189	0.004711	0.268551	0.514723	0.791519	1	0.003534	0.281508	0.507656	0.727915	0.998822	0.001178	0.203769	0.468787	0.722026	0.992933	0.3298	0.189635	0.480565	0.069575	0.083726	0.003538	0.001178	0.314488	0.539458	0.762073	1	0.146054	0.308598	0.546525	0.829211	0.995289	0.011779	0.166078	0.436985	0.689046	0.96702	0.542992	0.382075	0.010601	0.274441	0.475854	0.705536	0.992933	0.286219
0.334615	0.388462	0.276923	0.258687	0.220077	0.216216	0.057692	0.346154	0.553846	0.773077	0.996154	0.007692	0.203846	0.419231	0.707692	1	0.003846	0.219231	0.5	0.75	0.988462	0.526923	0.246154	0.226923	0.100386	0.061776	0	0.003846	0.223077	0.369231	0.680769	1	0.015385	0.434615	0.6	0.834615	0.992308	0.042308	0.134615	0.534615	0.769231	0.930769	0.403846	0.362934	0.011538	0.188462	0.496154	0.780769	0.988462	0.396154
0.331839	0.452915	0.215247	0.333333	0.13964	0.171171	0.026906	0.29148	0.475336	0.695067	1	0.013453	0.255605	0.560538	0.744395	0.995516	0.004484	0.174888	0.331839	0.7713	0.991031	0.479821	0.278027	0.242152	0.09009	0.081081	0.009009	0.004484	0.304933	0.524664	0.690583	1	0.008969	0.09417	0.206278	0.331839	0.820628	0.484305	0.672646	0.798206	0.892377	0.991031	0.367713	0.423423	0.008969	0.219731	0.430493	0.807175	0.991031	0.488789
0.331801	0.444853	0.223346	0.285189	0.160074	0.181233	0.004596	0.241728	0.528493	0.761029	0.999081	0.001838	0.215993	0.442096	0.770221	1	0.000919	0.335478	0.536765	0.694853	0.996324	0.670037	0.098346	0.231618	0.041398	0.061638	0.00276	0.000919	0.206801	0.443015	0.807904	1	0.025735	0.471507	0.591912	0.690257	0.992647	0.073529	0.272978	0.485294	0.639706	0.988051	0.451287	0.342226	0.011029	0.390625	0.564338	0.767463	0.996324	0.434743
0.330189	0.396226	0.273585	0.2	0.219048	0.219048	0.037736	0.264151	0.433962	0.716981	0.990566	0.018868	0.245283	0.59434	0.858491	0.981132	0.009434	0.179245	0.424528	0.613208	1	0.415094	0.04717	0.537736	0.019048	0.114286	0	0.009434	0.301887	0.716981	0.896226	1	0.613208	0.613208	0.622642	0.632075	0.650943	0.037736	0.179245	0.377358	0.509434	0.830189	0.330189	0.380952	0.04717	0.198113	0.386792	0.603774	0.830189	0.415094
0.422018	0.192661	0.385321	0.12963	0.305556	0.148148	0.018349	0.165138	0.449541	0.642202	1	0.174312	0.348624	0.431193	0.697248	0.899083	0.009174	0.247706	0.577982	0.770642	0.990826	0.385321	0.174312	0.440367	0.046296	0.064815	0.009259	0.009174	0.091743	0.330275	0.724771	1	0.247706	0.275229	0.385321	0.431193	0.779817	0.100917	0.477064	0.587156	0.87156	0.981651	0.477064	0.37037	0.06422	0.376147	0.541284	0.752294	0.990826	0.165138
0.375	0.350962	0.274038	0.280193	0.198068	0.241546	0.009615	0.230769	0.509615	0.730769	1	0.024038	0.307692	0.514423	0.783654	0.990385	0.004808	0.211538	0.432692	0.716346	0.980769	0.331731	0.283654	0.384615	0.10628	0.048309	0	0.004808	0.216346	0.471154	0.798077	1	0.014423	0.197115	0.403846	0.634615	0.990385	0.052885	0.322115	0.576923	0.730769	0.879808	0.451923	0.463768	0.019231	0.288462	0.514423	0.701923	0.980769	0.326923
0.568465	0.248963	0.182573	0.291667	0.1875	0.075	0.012448	0.377593	0.589212	0.788382	1	0.008299	0.190871	0.452282	0.755187	0.995851	0.004149	0.107884	0.273859	0.390041	0.929461	0.572614	0.124481	0.302905	0.05	0.1	0.008333	0.004149	0.410788	0.659751	0.813278	1	0.016598	0.041494	0.186722	0.236515	0.817427	0.053942	0.26556	0.348548	0.485477	0.962656	0.219917	0.208333	0.016598	0.112033	0.244813	0.3361	0.825726	0.240664
0.453782	0.369748	0.176471	0.297335	0.15007	0.134642	0.004202	0.2493	0.415966	0.689076	1	0.007003	0.184874	0.54902	0.809524	0.995798	0.001401	0.383754	0.561625	0.746499	0.998599	0.661064	0.180672	0.158263	0.091164	0.057504	0.004208	0.001401	0.205882	0.396359	0.731092	1	0.004202	0.39916	0.588235	0.77451	0.906162	0.110644	0.455182	0.619048	0.7507	0.910364	0.364146	0.2777	0.005602	0.464986	0.645658	0.858543	0.985994	0.432773
0.323136	0.445507	0.231358	0.260536	0.130268	0.204981	0.003824	0.248566	0.487572	0.711281	0.994264	0.005736	0.229446	0.51434	0.741874	1	0.001912	0.273423	0.470363	0.780115	0.99044	0.695985	0.049713	0.254302	0.032567	0.051724	0.001916	0.001912	0.239006	0.516252	0.699809	1	0.049713	0.210325	0.443595	0.537285	0.837476	0.133843	0.328872	0.424474	0.921606	0.994264	0.386233	0.383142	0.00956	0.273423	0.539197	0.776291	0.99044	0.435946
0.417062	0.331754	0.251185	0.333333	0.166667	0.171429	0.014218	0.28436	0.601896	0.819905	1	0.009479	0.165877	0.417062	0.672986	0.990521	0.004739	0.255924	0.488152	0.649289	0.981043	0.488152	0.218009	0.293839	0.061905	0.071429	0.014286	0.004739	0.14218	0.421801	0.819905	1	0.123223	0.222749	0.364929	0.601896	0.672986	0.075829	0.488152	0.71564	0.78673	0.971564	0.374408	0.314286	0.042654	0.255924	0.407583	0.606635	0.981043	0.298578
0.373333	0.36	0.266667	0.263393	0.214286	0.174107	0.008889	0.253333	0.475556	0.715556	1	0.022222	0.315556	0.551111	0.746667	0.991111	0.004444	0.182222	0.4	0.755556	0.977778	0.555556	0.2	0.244444	0.089286	0.053571	0	0.004444	0.306667	0.511111	0.666667	1	0.035556	0.231111	0.364444	0.808889	0.986667	0.088889	0.142222	0.408889	0.755556	0.92	0.408889	0.375	0.035556	0.226667	0.404444	0.742222	0.986667	0.355556
0.310959	0.394521	0.294521	0.163237	0.234568	0.266118	0.008219	0.19589	0.471233	0.753425	0.99863	0.00274	0.243836	0.49863	0.736986	1	0.00137	0.289041	0.515068	0.754795	0.994521	0.656164	0.1	0.243836	0.043896	0.082305	0	0.00137	0.242466	0.478082	0.689041	1	0.09863	0.161644	0.324658	0.9	0.994521	0.061644	0.347945	0.663014	0.794521	0.975342	0.673973	0.208505	0.015068	0.410959	0.583562	0.757534	0.991781	0.415068
0.336066	0.344262	0.319672	0.231405	0.231405	0.214876	0.040984	0.180328	0.491803	0.696721	0.991803	0.032787	0.319672	0.57377	0.762295	0.97541	0.008197	0.188525	0.434426	0.721311	1	0.336066	0.221311	0.442623	0.082645	0.066116	0	0.008197	0.221311	0.467213	0.754098	1	0.245902	0.286885	0.368852	0.459016	0.852459	0.065574	0.163934	0.606557	0.713115	0.959016	0.459016	0.297521	0.02459	0.295082	0.467213	0.786885	0.983607	0.311475
0.335329	0.377246	0.287425	0.256	0.186	0.228	0.003992	0.275449	0.552894	0.854291	1	0.00998	0.201597	0.403194	0.704591	0.996008	0.001996	0.297405	0.512974	0.700599	0.962076	0.44511	0.157685	0.397206	0.06	0.076	0.004	0.001996	0.115768	0.349301	0.702595	1	0.125749	0.397206	0.562874	0.746507	0.848303	0.0998	0.329341	0.548902	0.858283	0.984032	0.48503	0.328	0.005988	0.301397	0.491018	0.724551	0.924152	0.411178
0.393665	0.321267	0.285068	0.222727	0.245455	0.195455	0.022624	0.244344	0.556561	0.846154	1	0.00905	0.180995	0.506787	0.733032	0.963801	0.004525	0.230769	0.41629	0.647059	0.927602	0.443439	0.334842	0.221719	0.113636	0.068182	0.013636	0.004525	0.262443	0.61991	0.81448	1	0.036199	0.312217	0.447964	0.588235	0.923077	0.013575	0.095023	0.244344	0.850679	0.963801	0.384615	0.4	0.0181	0.235294	0.41629	0.624434	0.923077	0.366516
0.332031	0.332031	0.335938	0.227451	0.235294	0.243137	0.011719	0.214844	0.4375	0.730469	0.988281	0.019531	0.292969	0.539062	0.71875	0.996094	0.003906	0.246094	0.5	0.761719	1	0.460938	0.292969	0.246094	0.12549	0.062745	0	0.003906	0.230469	0.441406	0.699219	1	0.164062	0.304688	0.503906	0.761719	0.941406	0.050781	0.125	0.53125	0.8125	0.988281	0.5	0.423529	0.015625	0.324219	0.511719	0.761719	0.992188	0.382812
0.299383	0.37037	0.330247	0.210526	0.213622	0.216718	0.012346	0.283951	0.512346	0.762346	1	0.006173	0.20679	0.478395	0.728395	0.987654	0.003086	0.256173	0.453704	0.746914	0.993827	0.444444	0.216049	0.339506	0.065015	0.058824	0.003096	0.003086	0.169753	0.435185	0.651235	1	0.012346	0.231481	0.447531	0.759259	0.938272	0.021605	0.395062	0.589506	0.82716	0.975309	0.540123	0.334365	0.009259	0.262346	0.490741	0.737654	0.987654	0.361111
0.35625	0.35	0.29375	0.310345	0.241379	0.181818	0.015625	0.23125	0.521875	0.775	0.9875	0.00625	0.303125	0.5875	0.81875	1	0.003125	0.19375	0.403125	0.6	0.95	0.59375	0.228125	0.178125	0.056426	0.056426	0.00627	0.003125	0.321875	0.646875	0.834375	1	0.009375	0.265625	0.353125	0.490625	0.578125	0.021875	0.121875	0.371875	0.68125	0.878125	0.465625	0.382445	0.009375	0.275	0.4375	0.60625	0.965625	0.403125
0.314488	0.353357	0.332155	0.234043	0.219858	0.244681	0.010601	0.282686	0.597173	0.809187	0.996466	0.007067	0.243816	0.466431	0.738516	1	0.003534	0.212014	0.434629	0.628975	0.985866	0.533569	0.332155	0.134276	0.113475	0.042553	0.014184	0.003534	0.293286	0.611307	0.826855	1	0.021201	0.257951	0.399293	0.572438	0.968198	0.045936	0.088339	0.469965	0.696113	0.742049	0.452297	0.411348	0.014134	0.261484	0.448763	0.600707	0.992933	0.416961
0.243094	0.48895	0.267956	0.210526	0.144044	0.240997	0.005525	0.196133	0.359116	0.505525	0.991713	0.008287	0.323204	0.646409	0.828729	1	0.002762	0.212707	0.428177	0.649171	0.986188	0.640884	0.185083	0.174033	0.074792	0.047091	0.00831	0.002762	0.323204	0.635359	0.801105	1	0.058011	0.171271	0.309392	0.428177	0.922652	0.046961	0.118785	0.353591	0.530387	0.98895	0.599448	0.243767	0.052486	0.417127	0.657459	0.823204	0.994475	0.486188
0.317181	0.351164	0.331655	0.209068	0.222922	0.22796	0.001259	0.246067	0.473254	0.751416	0.996224	0.005035	0.229704	0.510384	0.765261	0.998112	0.000629	0.268722	0.505979	0.737571	1	0.451857	0.126495	0.421649	0.051637	0.081864	0.005038	0.000629	0.293266	0.535557	0.75708	1	0.003147	0.294525	0.487099	0.599119	0.98112	0.008181	0.240403	0.445563	0.743864	0.996853	0.518565	0.381612	0.003147	0.24292	0.487728	0.701699	0.995595	0.372561
0.358491	0.311321	0.330189	0.218009	0.222749	0.180095	0.009434	0.25	0.54717	0.801887	1	0.014151	0.193396	0.424528	0.698113	0.976415	0.004717	0.29717	0.523585	0.688679	0.995283	0.556604	0.169811	0.273585	0.056872	0.066351	0	0.004717	0.141509	0.396226	0.660377	1	0.174528	0.528302	0.693396	0.754717	0.985849	0.066038	0.334906	0.584906	0.792453	0.929245	0.45283	0.331754	0.099057	0.34434	0.566038	0.707547	0.995283	0.353774
0.267857	0.487013	0.24513	0.214634	0.120325	0.253659	0.00487	0.224026	0.449675	0.775974	0.993506	0.003247	0.267857	0.540584	0.727273	0.996753	0.001623	0.23539	0.465909	0.709416	1	0.714286	0.097403	0.188312	0.053659	0.043902	0.001626	0.001623	0.279221	0.599026	0.805195	1	0.012987	0.238636	0.363636	0.456169	0.965909	0.035714	0.206169	0.308442	0.491883	0.988636	0.452922	0.360976	0.01461	0.232143	0.464286	0.668831	0.998377	0.48539
0.451939	0.298482	0.249578	0.280405	0.206081	0.179054	0.008432	0.273187	0.499157	0.730185	0.996627	0.003373	0.264755	0.475548	0.745363	0.998314	0.001686	0.220911	0.51602	0.772344	1	0.51602	0.129848	0.354132	0.054054	0.084459	0	0.001686	0.234401	0.460371	0.655987	1	0.11973	0.219224	0.337268	0.790894	0.991568	0.016863	0.300169	0.625632	0.865093	0.984823	0.318718	0.361486	0.005059	0.175379	0.504216	0.79258	0.993255	0.338954
0.413885	0.365821	0.220294	0.264706	0.17246	0.171123	0.00534	0.242991	0.516689	0.82243	1	0.00267	0.311081	0.512684	0.715621	0.993324	0.001335	0.214953	0.449933	0.676903	0.94259	0.594126	0.06008	0.345794	0.028075	0.076203	0.004011	0.001335	0.252336	0.495327	0.735648	1	0.024032	0.165554	0.316422	0.58745	0.715621	0.021362	0.284379	0.519359	0.817089	0.995995	0.356475	0.342246	0.004005	0.194927	0.427236	0.604806	0.94259	0.383178
0.374126	0.297203	0.328671	0.225919	0.255692	0.211909	0.006993	0.277972	0.527972	0.774476	1	0.003497	0.236014	0.508741	0.748252	0.996503	0.001748	0.237762	0.456294	0.694056	0.991259	0.40035	0.386364	0.213287	0.113835	0.064799	0.019264	0.001748	0.26049	0.533217	0.744755	1	0.020979	0.25	0.479021	0.70979	0.935315	0.034965	0.199301	0.435315	0.802448	0.994755	0.452797	0.409807	0.005245	0.26049	0.5	0.723776	0.991259	0.335664
0.371762	0.274611	0.353627	0.199741	0.300908	0.1738	0.007772	0.279793	0.541451	0.759067	0.998705	0.005181	0.220207	0.463731	0.705959	0.994819	0.001295	0.240933	0.492228	0.756477	1	0.467617	0.234456	0.297927	0.092088	0.058366	0.001297	0.001295	0.207254	0.431347	0.734456	1	0.042746	0.186528	0.436528	0.80829	0.967617	0.006477	0.331606	0.554404	0.713731	0.997409	0.572539	0.399481	0.003886	0.246114	0.487047	0.739637	0.996114	0.283679
0.432432	0.261261	0.306306	0.245455	0.263636	0.145455	0.018018	0.279279	0.468468	0.747748	0.990991	0.045045	0.189189	0.567568	0.792793	1	0.009009	0.234234	0.387387	0.657658	0.954955	0.396396	0.513514	0.09009	0.163636	0.018182	0	0.009009	0.198198	0.468468	0.684685	1	0.036036	0.225225	0.387387	0.630631	0.855856	0.891892	0.900901	0.927928	0.945946	0.972973	0.441441	0.327273	0.036036	0.243243	0.495495	0.630631	0.954955	0.288288
0.327125	0.37369	0.299185	0.216783	0.216783	0.201632	0.003492	0.288708	0.537835	0.76135	0.995343	0.006985	0.19092	0.521537	0.777648	1	0.001164	0.285215	0.461001	0.648428	0.998836	0.59837	0.017462	0.384168	0.01049	0.064103	0.001166	0.001164	0.152503	0.580908	0.83702	1	0.250291	0.252619	0.431898	0.778813	0.9383	0.096624	0.351572	0.488941	0.610012	0.859139	0.57858	0.428904	0.002328	0.195576	0.434226	0.67404	0.998836	0.370198
0.330909	0.334545	0.334545	0.19708	0.229927	0.226277	0.010909	0.247273	0.501818	0.763636	1	0.007273	0.236364	0.487273	0.741818	0.970909	0.003636	0.265455	0.494545	0.723636	0.985455	0.370909	0.178182	0.450909	0.051095	0.10219	0	0.003636	0.181818	0.458182	0.705455	1	0.152727	0.305455	0.392727	0.603636	0.698182	0.007273	0.261818	0.509091	0.818182	0.992727	0.541818	0.394161	0.018182	0.247273	0.469091	0.669091	0.985455	0.341818
0.338742	0.35497	0.306288	0.227642	0.195122	0.215447	0.008114	0.269777	0.537525	0.770791	0.995943	0.010142	0.298174	0.525355	0.750507	0.997972	0.002028	0.156187	0.40568	0.713996	1	0.46856	0.125761	0.40568	0.050813	0.103659	0.006098	0.002028	0.25355	0.614604	0.8357	1	0.004057	0.085193	0.31643	0.490872	0.975659	0.05071	0.275862	0.496957	0.636917	0.914807	0.513185	0.406504	0.006085	0.206897	0.413793	0.616633	0.993915	0.389452
0.355372	0.297521	0.347107	0.204969	0.267081	0.186335	0.018595	0.229339	0.541322	0.791322	0.997934	0.004132	0.204545	0.42562	0.702479	1	0.002066	0.289256	0.506198	0.741736	0.995868	0.450413	0.173554	0.376033	0.066253	0.086957	0.004141	0.002066	0.130165	0.402893	0.719008	1	0.008264	0.419421	0.621901	0.762397	0.927686	0.115702	0.316116	0.52686	0.739669	0.993802	0.528926	0.356108	0.004132	0.318182	0.514463	0.764463	0.995868	0.340909
0.356522	0.304348	0.33913	0.209607	0.279476	0.218341	0.017391	0.256522	0.495652	0.8	0.995652	0.008696	0.269565	0.53913	0.734783	0.986957	0.004348	0.2	0.434783	0.730435	1	0.356522	0.204348	0.43913	0.069869	0.069869	0.008734	0.004348	0.317391	0.643478	0.826087	1	0.147826	0.208696	0.365217	0.769565	0.882609	0.013043	0.117391	0.447826	0.634783	0.991304	0.495652	0.436681	0.026087	0.278261	0.504348	0.704348	0.986957	0.282609
0.325758	0.337121	0.337121	0.205323	0.235741	0.250951	0.007576	0.219697	0.454545	0.738636	0.981061	0.015152	0.268939	0.537879	0.772727	0.996212	0.003788	0.231061	0.511364	0.708333	1	0.367424	0.265152	0.367424	0.076046	0.076046	0.015209	0.003788	0.284091	0.473485	0.852273	1	0.060606	0.140152	0.587121	0.753788	0.94697	0.007576	0.227273	0.435606	0.69697	0.931818	0.55303	0.460076	0.003788	0.231061	0.522727	0.723485	0.984848	0.359848
0.382488	0.366359	0.251152	0.258661	0.17321	0.184758	0.009217	0.278802	0.52765	0.806452	1	0.004608	0.274194	0.518433	0.705069	0.988479	0.002304	0.184332	0.394009	0.732719	0.981567	0.709677	0.16129	0.129032	0.060046	0.032333	0	0.002304	0.352535	0.529954	0.709677	1	0.105991	0.221198	0.292627	0.797235	0.884793	0.006912	0.059908	0.145161	0.767281	0.85023	0.297235	0.290993	0.006912	0.152074	0.274194	0.732719	0.981567	0.384793
0.401015	0.284264	0.314721	0.214286	0.25	0.173469	0.015228	0.253807	0.527919	0.761421	1	0.010152	0.208122	0.446701	0.715736	0.994924	0.005076	0.243655	0.502538	0.741117	0.984772	0.467005	0.187817	0.345178	0.066327	0.066327	0.02551	0.005076	0.152284	0.522843	0.766497	1	0.071066	0.274112	0.614213	0.939086	0.989848	0.040609	0.324873	0.426396	0.720812	0.918782	0.502538	0.408163	0.020305	0.329949	0.502538	0.746193	0.984772	0.279188
0.412969	0.290102	0.296928	0.219178	0.267123	0.174658	0.010239	0.283276	0.542662	0.819113	0.989761	0.006826	0.276451	0.508532	0.672355	1	0.003413	0.1843	0.40273	0.679181	0.993174	0.518771	0.1843	0.296928	0.061644	0.054795	0	0.003413	0.34471	0.713311	0.843003	1	0.03413	0.197952	0.273038	0.52901	0.703072	0.09215	0.16041	0.416382	0.491468	0.921502	0.457338	0.390411	0.017065	0.194539	0.423208	0.610922	0.952218	0.317406
0.382306	0.407583	0.210111	0.292722	0.155063	0.137658	0.004739	0.230648	0.516588	0.763033	1	0.00316	0.268562	0.616114	0.800948	0.993681	0.00158	0.200632	0.377567	0.537125	0.99842	0.608215	0.148499	0.243286	0.064873	0.049051	0.001582	0.00158	0.315956	0.687204	0.838863	1	0.017378	0.314376	0.437599	0.546603	0.987362	0.020537	0.120063	0.28594	0.527646	0.679305	0.513428	0.357595	0.007899	0.327014	0.593997	0.778831	0.992101	0.399684
0.30102	0.428571	0.270408	0.253197	0.173913	0.237852	0.007653	0.227041	0.47449	0.721939	1	0.015306	0.288265	0.556122	0.811224	0.997449	0.002551	0.183673	0.446429	0.69898	0.992347	0.558673	0.214286	0.227041	0.081841	0.051151	0	0.002551	0.265306	0.561224	0.859694	1	0.02551	0.178571	0.392857	0.576531	0.742347	0.056122	0.216837	0.433673	0.691327	0.795918	0.510204	0.286445	0.022959	0.295918	0.594388	0.829082	0.987245	0.428571
0.394366	0.29108	0.314554	0.264151	0.287736	0.169811	0.00939	0.276995	0.549296	0.798122	1	0.014085	0.225352	0.431925	0.70892	0.981221	0.004695	0.253521	0.502347	0.704225	0.995305	0.492958	0.244131	0.262911	0.09434	0.066038	0	0.004695	0.220657	0.469484	0.694836	1	0.046948	0.201878	0.394366	0.652582	0.849765	0.103286	0.305164	0.596244	0.892019	0.957746	0.403756	0.349057	0.042254	0.239437	0.511737	0.704225	0.99061	0.295775
0.315855	0.314607	0.369538	0.16625	0.25625	0.2475	0.006242	0.282147	0.526841	0.762797	0.998752	0.004994	0.23221	0.478152	0.736579	1	0.001248	0.230961	0.483146	0.745318	0.997503	0.475655	0.227216	0.297129	0.08875	0.05875	0.00625	0.001248	0.214732	0.453184	0.742821	1	0.03995	0.173533	0.414482	0.805243	0.997503	0.006242	0.343321	0.569288	0.732834	0.991261	0.570537	0.395	0.003745	0.260924	0.469413	0.736579	0.997503	0.333333
0.354839	0.258065	0.387097	0.184783	0.228261	0.163043	0.053763	0.268817	0.494624	0.655914	0.978495	0.021505	0.344086	0.72043	0.892473	0.989247	0.010753	0.215054	0.430108	0.688172	1	0.430108	0.397849	0.172043	0.152174	0.065217	0.021739	0.010753	0.204301	0.602151	0.892473	1	0.215054	0.322581	0.537634	0.741935	0.88172	0.032258	0.11828	0.16129	0.430108	0.483871	0.494624	0.304348	0.064516	0.236559	0.451613	0.774194	0.956989	0.301075
0.367965	0.324675	0.307359	0.208696	0.265217	0.217391	0.012987	0.272727	0.502165	0.718615	1	0.008658	0.212121	0.484848	0.757576	0.987013	0.004329	0.225108	0.489177	0.748918	0.995671	0.376623	0.233766	0.38961	0.086957	0.052174	0	0.004329	0.225108	0.489177	0.831169	1	0.04329	0.251082	0.497835	0.731602	0.965368	0.116883	0.207792	0.467532	0.649351	0.874459	0.532468	0.452174	0.021645	0.229437	0.515152	0.748918	0.969697	0.320346
0.37037	0.259259	0.37037	0.175	0.3	0.1875	0.074074	0.234568	0.493827	0.666667	0.975309	0.024691	0.08642	0.37037	0.716049	1	0.012346	0.333333	0.518519	0.753086	0.987654	0.432099	0.444444	0.123457	0.1625	0.0375	0.0125	0.012346	0.185185	0.54321	0.802469	1	0.209877	0.358025	0.580247	0.753086	0.950617	0.098765	0.111111	0.148148	0.17284	0.481481	0.493827	0.375	0.08642	0.37037	0.518519	0.777778	0.987654	0.296296
0.313283	0.581454	0.105263	0.263819	0.09799	0.075377	0.005013	0.295739	0.501253	0.744361	0.994987	0.010025	0.22807	0.536341	0.779449	1	0.002506	0.310777	0.43609	0.616541	0.987469	0.879699	0.065163	0.055138	0.040201	0.015075	0	0.002506	0.218045	0.553885	0.776942	1	0.303258	0.365915	0.401003	0.441103	0.79198	0.333333	0.343358	0.448622	0.461153	0.528822	0.689223	0.241206	0.010025	0.225564	0.571429	0.814536	0.992481	0.598997
0.52193	0.302632	0.175439	0.273128	0.136564	0.114537	0.013158	0.254386	0.526316	0.789474	1	0.008772	0.311404	0.513158	0.719298	0.991228	0.004386	0.175439	0.399123	0.557018	0.881579	0.45614	0.087719	0.45614	0.035242	0.044053	0	0.004386	0.421053	0.596491	0.837719	1	0.100877	0.118421	0.486842	0.508772	0.885965	0.135965	0.245614	0.359649	0.714912	0.95614	0.289474	0.334802	0.030702	0.241228	0.425439	0.535088	0.881579	0.337719
0.340136	0.340136	0.319728	0.253425	0.246575	0.226027	0.034014	0.285714	0.557823	0.748299	1	0.020408	0.176871	0.360544	0.591837	0.993197	0.006803	0.319728	0.564626	0.755102	0.972789	0.639456	0.156463	0.204082	0.054795	0.054795	0.013699	0.006803	0.170068	0.333333	0.591837	1	0.129252	0.52381	0.761905	0.823129	0.986395	0.027211	0.557823	0.659864	0.884354	0.938776	0.408163	0.410959	0.027211	0.285714	0.455782	0.741497	0.972789	0.360544
0.367021	0.295745	0.337234	0.216187	0.242812	0.201278	0.004255	0.224468	0.521277	0.75	1	0.002128	0.256383	0.457447	0.744681	0.998936	0.001064	0.265957	0.502128	0.746809	0.997872	0.380851	0.148936	0.470213	0.055378	0.080937	0.00213	0.001064	0.255319	0.524468	0.820213	1	0.12234	0.362766	0.706383	0.889362	0.970213	0.003191	0.157447	0.457447	0.632979	0.991489	0.510638	0.396166	0.005319	0.269149	0.478723	0.746809	0.997872	0.338298
0.382658	0.37983	0.237512	0.260377	0.168868	0.184906	0.001885	0.264844	0.566447	0.708765	1	0.00754	0.269557	0.516494	0.786051	0.998115	0.000943	0.209237	0.402451	0.758718	0.999057	0.532516	0.168709	0.298775	0.077358	0.073585	0.00566	0.000943	0.33082	0.592837	0.799246	1	0.002828	0.095193	0.286522	0.793591	0.976437	0.065975	0.243167	0.404336	0.622997	0.986805	0.377945	0.303774	0.00377	0.176249	0.326107	0.548539	0.991517	0.381715
0.313187	0.478022	0.208791	0.250689	0.162534	0.190083	0.008242	0.197802	0.409341	0.667582	0.989011	0.019231	0.368132	0.623626	0.802198	0.997253	0.002747	0.151099	0.343407	0.598901	1	0.431319	0.159341	0.409341	0.071625	0.060606	0	0.002747	0.236264	0.489011	0.752747	1	0.008242	0.104396	0.285714	0.384615	0.56044	0.041209	0.357143	0.626374	0.804945	0.994505	0.568681	0.391185	0.005495	0.288462	0.60989	0.799451	0.991758	0.43956
0.472727	0.276364	0.250909	0.244526	0.240876	0.156934	0.010909	0.272727	0.538182	0.792727	1	0.007273	0.243636	0.48	0.763636	0.992727	0.003636	0.225455	0.429091	0.64	0.967273	0.538182	0.127273	0.334545	0.058394	0.10219	0.007299	0.003636	0.221818	0.483636	0.770909	1	0.229091	0.345455	0.570909	0.64	0.767273	0.098182	0.2	0.530909	0.785455	0.989091	0.305455	0.313869	0.090909	0.221818	0.370909	0.592727	0.869091	0.305455
0.369845	0.291237	0.338918	0.193548	0.254194	0.216774	0.002577	0.271907	0.53866	0.759021	1	0.007732	0.194588	0.444588	0.735825	0.996134	0.001289	0.247423	0.507732	0.734536	0.998711	0.440722	0.155928	0.403351	0.08	0.064516	0.002581	0.001289	0.289948	0.481959	0.78866	1	0.002577	0.194588	0.375	0.903351	0.997423	0.023196	0.257732	0.551546	0.675258	0.935567	0.521907	0.405161	0.003866	0.247423	0.462629	0.67268	0.998711	0.291237
0.329333	0.412	0.258667	0.259012	0.193591	0.189586	0.004	0.256	0.5	0.726667	1	0.002667	0.186667	0.456	0.761333	0.996	0.001333	0.34	0.554667	0.746667	0.993333	0.618667	0.128	0.253333	0.056075	0.066756	0.00267	0.001333	0.170667	0.44	0.790667	1	0.008	0.4	0.646667	0.722667	0.977333	0.08	0.322667	0.52	0.684	0.968	0.517333	0.437917	0.008	0.221333	0.530667	0.742667	0.994667	0.38
0.344643	0.403571	0.251786	0.26297	0.168157	0.187835	0.005357	0.276786	0.457143	0.721429	1	0.003571	0.219643	0.508929	0.767857	0.998214	0.001786	0.298214	0.516071	0.744643	0.991071	0.551786	0.164286	0.283929	0.069767	0.069767	0.0161	0.001786	0.216071	0.423214	0.705357	1	0.132143	0.194643	0.475	0.798214	0.951786	0.005357	0.417857	0.521429	0.735714	0.994643	0.451786	0.368515	0.025	0.296429	0.542857	0.771429	0.991071	0.403571
0.359736	0.330033	0.310231	0.261589	0.192053	0.241722	0.013201	0.264026	0.452145	0.759076	1	0.006601	0.254125	0.544554	0.735974	0.993399	0.0033	0.221122	0.514851	0.726073	0.980198	0.491749	0.181518	0.326733	0.069536	0.076159	0.009934	0.0033	0.30033	0.518152	0.772277	1	0.059406	0.125413	0.570957	0.775578	0.943894	0.023102	0.237624	0.462046	0.712871	0.966997	0.429043	0.397351	0.016502	0.214521	0.438944	0.693069	0.993399	0.382838
0.416382	0.262799	0.320819	0.19863	0.256849	0.164384	0.006826	0.317406	0.556314	0.761092	1	0.020478	0.191126	0.392491	0.648464	0.90785	0.003413	0.245734	0.491468	0.764505	0.993174	0.37884	0.228669	0.392491	0.075342	0.068493	0	0.003413	0.197952	0.477816	0.62116	1	0.013652	0.163823	0.395904	0.767918	0.945392	0.054608	0.34471	0.549488	0.825939	0.993174	0.559727	0.349315	0.013652	0.232082	0.464164	0.709898	0.993174	0.286689
0.388797	0.341021	0.270181	0.264026	0.188119	0.168317	0.009885	0.172982	0.425041	0.721582	0.998353	0.004942	0.266886	0.520593	0.759473	0.990115	0.001647	0.359143	0.555189	0.769357	1	0.487644	0.149918	0.362438	0.054455	0.087459	0.00495	0.001647	0.16145	0.299835	0.609555	1	0.008237	0.494234	0.68369	0.843493	0.924217	0.06425	0.410214	0.593081	0.785832	0.996705	0.484349	0.359736	0.003295	0.390445	0.561779	0.775947	0.99341	0.372323
0.396694	0.272727	0.330579	0.15	0.258333	0.216667	0.041322	0.256198	0.471074	0.694215	1	0.016529	0.347107	0.495868	0.801653	0.975207	0.008264	0.181818	0.429752	0.710744	0.983471	0.38843	0.272727	0.338843	0.1	0.083333	0.016667	0.008264	0.289256	0.471074	0.818182	1	0.033058	0.297521	0.421488	0.53719	0.975207	0.132231	0.206612	0.578512	0.68595	0.892562	0.446281	0.416667	0.033058	0.214876	0.487603	0.669421	0.966942	0.297521
0.347611	0.495881	0.156507	0.242574	0.120462	0.135314	0.00659	0.202636	0.410214	0.607908	0.985173	0.003295	0.30972	0.637562	0.850082	1	0.001647	0.210873	0.431631	0.574959	0.98682	0.759473	0.052718	0.187809	0.019802	0.033003	0.0033	0.001647	0.228995	0.578254	0.790774	1	0.092257	0.327842	0.385502	0.436573	0.571664	0.128501	0.265239	0.410214	0.502471	0.953871	0.441516	0.356436	0.004942	0.30313	0.54201	0.790774	0.98682	0.518946
0.415042	0.231198	0.35376	0.165969	0.324965	0.182706	0.008357	0.236769	0.513928	0.756267	0.998607	0.005571	0.266017	0.504178	0.735376	0.994429	0.001393	0.231198	0.470752	0.739554	1	0.469359	0.224234	0.306407	0.093445	0.059972	0.004184	0.001393	0.204735	0.430362	0.707521	1	0.045961	0.192201	0.456825	0.845404	0.979109	0.006964	0.348189	0.575209	0.735376	0.997214	0.573816	0.407252	0.004178	0.253482	0.491643	0.746518	0.997214	0.256267
0.36833	0.309811	0.321859	0.187931	0.239655	0.213793	0.003442	0.228916	0.483649	0.741824	0.998279	0.013769	0.246127	0.433735	0.774527	1	0.001721	0.261618	0.531842	0.752151	0.991394	0.44062	0.015491	0.54389	0.012069	0.105172	0.001724	0.001721	0.215146	0.327022	0.54389	1	0.024096	0.158348	0.16179	0.234079	0.450947	0.041308	0.461274	0.640275	0.814114	0.996558	0.535284	0.427586	0.015491	0.297762	0.535284	0.75043	0.991394	0.318417
0.346977	0.382326	0.270698	0.250466	0.17784	0.216015	0.00186	0.28093	0.538605	0.823256	0.996279	0.006512	0.185116	0.426977	0.72093	1	0.00093	0.300465	0.537674	0.705116	0.992558	0.619535	0.073488	0.306977	0.040037	0.062384	0.004655	0.00093	0.204651	0.421395	0.817674	1	0.021395	0.091163	0.274419	0.84186	0.996279	0.004651	0.490233	0.59814	0.707907	0.873488	0.555349	0.396648	0.006512	0.335814	0.541395	0.76	0.99814	0.382326
0.308989	0.382022	0.308989	0.259887	0.20904	0.259887	0.016854	0.235955	0.494382	0.831461	1	0.011236	0.314607	0.52809	0.719101	0.983146	0.005618	0.202247	0.426966	0.646067	0.966292	0.421348	0.38764	0.191011	0.158192	0.022599	0	0.005618	0.207865	0.573034	0.865169	1	0.050562	0.191011	0.488764	0.651685	0.97191	0.331461	0.370787	0.421348	0.792135	0.842697	0.438202	0.497175	0.022472	0.292135	0.477528	0.651685	0.955056	0.337079
0.402571	0.329499	0.26793	0.232905	0.182126	0.181449	0.003383	0.274019	0.560893	0.81935	1	0.002706	0.284844	0.521651	0.759134	0.999323	0.000677	0.185386	0.384303	0.594723	0.983085	0.441137	0.02977	0.529093	0.010833	0.102911	0.005416	0.000677	0.34912	0.728687	0.854533	1	0.021651	0.093369	0.432341	0.520298	0.650203	0.003383	0.227334	0.402571	0.613667	0.99797	0.412043	0.291131	0.00203	0.186062	0.370771	0.564276	0.972936	0.343708
0.40404	0.318182	0.277778	0.233503	0.218274	0.162437	0.040404	0.232323	0.464646	0.762626	1	0.015152	0.247475	0.570707	0.828283	0.979798	0.005051	0.237374	0.494949	0.661616	0.878788	0.469697	0.09596	0.434343	0.060914	0.081218	0	0.005051	0.328283	0.671717	0.858586	1	0.025253	0.065657	0.712121	0.747475	0.80303	0.111111	0.232323	0.373737	0.545455	0.914141	0.449495	0.406091	0.030303	0.277778	0.510101	0.656566	0.939394	0.313131
0.306931	0.405941	0.287129	0.31	0.16	0.25	0.029703	0.188119	0.49505	0.722772	1	0.019802	0.247525	0.455446	0.732673	0.980198	0.009901	0.29703	0.50495	0.712871	0.950495	0.425743	0.376238	0.19802	0.11	0.05	0.01	0.009901	0.237624	0.445545	0.712871	1	0.039604	0.287129	0.60396	0.762376	0.920792	0.178218	0.217822	0.485149	0.534653	0.970297	0.49505	0.4	0.039604	0.29703	0.514851	0.792079	0.960396	0.415842
0.283154	0.412186	0.304659	0.223022	0.183453	0.251799	0.089606	0.329749	0.551971	0.795699	1	0.007168	0.164875	0.405018	0.698925	0.992832	0.003584	0.318996	0.569892	0.756272	0.97491	0.483871	0.197133	0.318996	0.089928	0.082734	0.010791	0.003584	0.204301	0.523297	0.767025	1	0.007168	0.232975	0.508961	0.731183	0.939068	0.100358	0.293907	0.458781	0.655914	0.956989	0.451613	0.446043	0.010753	0.293907	0.530466	0.731183	0.971326	0.422939
0.349372	0.332636	0.317992	0.234801	0.232704	0.192872	0.004184	0.177824	0.472803	0.723849	1	0.01046	0.330544	0.600418	0.834728	0.997908	0.002092	0.232218	0.439331	0.646444	0.972803	0.539749	0.123431	0.33682	0.052411	0.056604	0.002096	0.002092	0.320084	0.608787	0.834728	1	0.016736	0.23431	0.328452	0.650628	0.972803	0.006276	0.154812	0.399582	0.575314	0.799163	0.543933	0.343816	0.006276	0.286611	0.479079	0.73431	0.979079	0.368201
0.354839	0.390492	0.254669	0.25	0.193878	0.181973	0.010187	0.327674	0.57725	0.733447	1	0.003396	0.242784	0.443124	0.755518	0.994907	0.001698	0.210526	0.478778	0.736842	0.998302	0.616299	0.088285	0.295416	0.035714	0.059524	0.001701	0.001698	0.251273	0.421053	0.7691	1	0.351443	0.4618	0.528014	0.896435	0.991511	0.010187	0.103565	0.595925	0.680815	0.91511	0.415959	0.404762	0.005093	0.220713	0.456706	0.735144	0.989813	0.368421
0.319319	0.415415	0.265265	0.226453	0.182365	0.194389	0.002002	0.247247	0.556557	0.790791	0.994995	0.003003	0.242242	0.444444	0.731732	0.997998	0.001001	0.248248	0.510511	0.713714	1	0.593594	0.052052	0.354354	0.034068	0.074148	0.006012	0.001001	0.301301	0.484484	0.78979	1	0.132132	0.4004	0.538539	0.774775	0.952953	0.038038	0.218218	0.513514	0.714715	0.992993	0.407407	0.380762	0.004004	0.245245	0.437437	0.705706	0.996997	0.428428
0.450382	0.423664	0.125954	0.494253	0.118774	0.091954	0.01145	0.278626	0.496183	0.721374	0.984733	0.007634	0.335878	0.576336	0.805344	1	0.003817	0.114504	0.21374	0.30916	0.969466	0.820611	0.103053	0.076336	0.045977	0.015326	0	0.003817	0.377863	0.583969	0.793893	1	0.041985	0.141221	0.206107	0.301527	0.729008	0.087786	0.103053	0.122137	0.248092	0.267176	0.236641	0.252874	0.038168	0.156489	0.290076	0.522901	0.977099	0.412214
0.329365	0.39881	0.271825	0.272366	0.192843	0.182903	0.005952	0.230159	0.468254	0.755952	0.998016	0.019841	0.202381	0.448413	0.71627	1	0.001984	0.35119	0.559524	0.785714	0.996032	0.464286	0.073413	0.462302	0.027833	0.087475	0.003976	0.001984	0.130952	0.339286	0.666667	1	0.599206	0.662698	0.839286	0.89881	0.974206	0.007937	0.349206	0.511905	0.75	0.996032	0.376984	0.290258	0.003968	0.515873	0.678571	0.847222	0.996032	0.44246
0.37037	0.422222	0.207407	0.358209	0.171642	0.134328	0.022222	0.274074	0.518519	0.740741	1	0.014815	0.162963	0.348148	0.644444	0.992593	0.007407	0.481481	0.62963	0.837037	0.97037	0.533333	0.340741	0.125926	0.074627	0.074627	0.014925	0.007407	0.266667	0.4	0.755556	1	0.22963	0.474074	0.6	0.718519	0.955556	0.02963	0.088889	0.118519	0.148148	0.977778	0.377778	0.492537	0.081481	0.244444	0.488889	0.725926	0.97037	0.42963
0.353333	0.306667	0.34	0.202673	0.238307	0.193764	0.004444	0.302222	0.522222	0.797778	0.997778	0.006667	0.18	0.464444	0.737778	0.995556	0.002222	0.251111	0.493333	0.711111	1	0.411111	0.173333	0.415556	0.055679	0.095768	0.006682	0.002222	0.277778	0.573333	0.835556	1	0.095556	0.284444	0.466667	0.668889	0.784444	0.011111	0.195556	0.431111	0.688889	0.993333	0.542222	0.347439	0.011111	0.213333	0.413333	0.68	0.991111	0.322222
0.34433	0.352577	0.303093	0.208462	0.186791	0.21259	0.003093	0.201031	0.406186	0.689691	1	0.002062	0.282474	0.560825	0.8	0.998969	0.001031	0.286598	0.534021	0.742268	0.995876	0.454639	0.110309	0.435052	0.047472	0.078431	0.002064	0.001031	0.274227	0.593814	0.856701	1	0.006186	0.378351	0.679381	0.802062	0.968041	0.021649	0.181443	0.434021	0.584536	0.992784	0.501031	0.373581	0.008247	0.353608	0.571134	0.775258	0.98866	0.372165
0.262664	0.476548	0.260788	0.214286	0.148496	0.236842	0.030019	0.249531	0.439024	0.727955	1	0.007505	0.26454	0.534709	0.78424	0.998124	0.001876	0.213884	0.500938	0.724203	0.994371	0.686679	0.166979	0.146341	0.067669	0.037594	0.003759	0.001876	0.275797	0.553471	0.804878	1	0.015009	0.238274	0.377111	0.690432	0.981238	0.016886	0.195122	0.341463	0.716698	0.834897	0.484053	0.368421	0.009381	0.358349	0.641651	0.827392	0.994371	0.45591
0.384333	0.328029	0.287638	0.275735	0.207108	0.208333	0.004896	0.26683	0.531212	0.780906	0.998776	0.002448	0.253366	0.495716	0.74541	1	0.001224	0.215422	0.451652	0.682987	0.986536	0.485924	0.21175	0.302326	0.077206	0.055147	0.003676	0.001224	0.244798	0.517748	0.831089	1	0.063647	0.179927	0.392901	0.784578	0.877601	0.003672	0.312118	0.559364	0.70257	0.964504	0.485924	0.333333	0.003672	0.255814	0.455324	0.679315	0.986536	0.334149
0.322275	0.393365	0.28436	0.242857	0.190476	0.252381	0.014218	0.227488	0.440758	0.720379	1	0.009479	0.274882	0.57346	0.805687	0.995261	0.004739	0.241706	0.436019	0.677725	0.919431	0.445498	0.43128	0.123223	0.128571	0.052381	0.004762	0.004739	0.2891	0.56872	0.838863	1	0.028436	0.317536	0.492891	0.677725	0.886256	0.080569	0.104265	0.236967	0.279621	0.971564	0.417062	0.447619	0.018957	0.241706	0.440758	0.663507	0.890995	0.407583
0.369444	0.277778	0.352778	0.189415	0.261838	0.222841	0.005556	0.280556	0.508333	0.766667	0.997222	0.011111	0.191667	0.461111	0.741667	0.983333	0.002778	0.263889	0.505556	0.730556	1	0.313889	0.108333	0.577778	0.044568	0.10585	0.005571	0.002778	0.152778	0.333333	0.616667	1	0.005556	0.072222	0.169444	0.261111	0.341667	0.022222	0.433333	0.644444	0.816667	0.994444	0.583333	0.37883	0.008333	0.252778	0.455556	0.694444	0.994444	0.291667
0.35284	0.337349	0.309811	0.237931	0.203448	0.218966	0.008606	0.32358	0.537005	0.753873	0.998279	0.006885	0.199656	0.500861	0.777969	1	0.001721	0.239243	0.432014	0.703959	0.996558	0.447504	0.170396	0.3821	0.067241	0.081034	0.005172	0.001721	0.173838	0.435456	0.784854	1	0.012048	0.211704	0.493976	0.738382	0.907057	0.089501	0.313253	0.526678	0.714286	0.958692	0.564544	0.324138	0.005164	0.246127	0.487091	0.707401	0.958692	0.380379
0.378641	0.339806	0.281553	0.303922	0.205882	0.156863	0.038835	0.252427	0.427184	0.728155	0.990291	0.067961	0.242718	0.563107	0.786408	1	0.009709	0.116505	0.407767	0.699029	0.912621	0.61165	0.097087	0.291262	0.098039	0.098039	0	0.009709	0.203883	0.368932	0.679612	1	0.097087	0.106796	0.524272	0.543689	0.708738	0.126214	0.407767	0.61165	0.825243	0.912621	0.38835	0.392157	0.07767	0.252427	0.495146	0.699029	0.961165	0.349515
0.272959	0.459184	0.267857	0.253197	0.15601	0.26087	0.017857	0.255102	0.492347	0.760204	0.989796	0.007653	0.247449	0.512755	0.742347	1	0.002551	0.232143	0.471939	0.737245	0.997449	0.354592	0.22449	0.420918	0.081841	0.071611	0	0.002551	0.267857	0.487245	0.803571	1	0.020408	0.19898	0.40051	0.540816	0.997449	0.058673	0.255102	0.586735	0.762755	0.979592	0.59949	0.434783	0.015306	0.280612	0.505102	0.737245	0.992347	0.52551
0.30719	0.411765	0.281046	0.246725	0.174672	0.251092	0.013072	0.211329	0.448802	0.762527	1	0.004357	0.261438	0.488017	0.740741	0.997821	0.002179	0.239651	0.533769	0.727669	0.984749	0.457516	0.082789	0.459695	0.045852	0.080786	0.002183	0.002179	0.206972	0.359477	0.636166	1	0.04793	0.163399	0.389978	0.6122	0.884532	0.010893	0.444444	0.594771	0.840959	0.989107	0.498911	0.379913	0.017429	0.331155	0.590414	0.736383	0.986928	0.420479
0.284615	0.415385	0.3	0.224806	0.224806	0.263566	0.030769	0.215385	0.430769	0.646154	0.969231	0.015385	0.269231	0.530769	0.792308	1	0.007692	0.2	0.523077	0.730769	0.992308	0.315385	0.492308	0.192308	0.093023	0.046512	0	0.007692	0.107692	0.323077	0.746154	1	0.061538	0.246154	0.461538	0.6	0.723077	0.3	0.776923	0.823077	0.869231	0.953846	0.469231	0.418605	0.038462	0.238462	0.530769	0.730769	0.946154	0.430769
0.307167	0.331058	0.361775	0.19863	0.205479	0.226027	0.006826	0.255973	0.501706	0.761092	0.982935	0.010239	0.232082	0.494881	0.709898	0.996587	0.003413	0.249147	0.484642	0.74744	1	0.399317	0.167235	0.433447	0.047945	0.10274	0	0.003413	0.177474	0.430034	0.696246	1	0.197952	0.358362	0.447099	0.641638	0.730375	0.051195	0.255973	0.532423	0.832765	0.993174	0.566553	0.390411	0.010239	0.228669	0.474403	0.665529	0.989761	0.334471
0.311475	0.401639	0.286885	0.251029	0.176955	0.271605	0.012295	0.233607	0.459016	0.770492	0.995902	0.008197	0.22541	0.528689	0.778689	1	0.004098	0.258197	0.47541	0.704918	0.983607	0.311475	0.077869	0.610656	0.032922	0.106996	0	0.004098	0.184426	0.397541	0.778689	1	0.471311	0.79918	0.848361	0.868852	0.897541	0.028689	0.278689	0.487705	0.655738	0.987705	0.495902	0.378601	0.036885	0.27459	0.471311	0.672131	0.983607	0.389344
0.376068	0.299145	0.324786	0.258621	0.25	0.189655	0.034188	0.230769	0.512821	0.777778	1	0.017094	0.222222	0.487179	0.65812	0.982906	0.008547	0.239316	0.461538	0.760684	0.965812	0.478632	0.435897	0.08547	0.094828	0.025862	0.008621	0.008547	0.162393	0.512821	0.717949	1	0.034188	0.299145	0.452991	0.606838	0.897436	0.119658	0.128205	0.91453	0.931624	0.957265	0.401709	0.586207	0.025641	0.25641	0.42735	0.726496	0.940171	0.316239
0.374172	0.304636	0.321192	0.232558	0.259136	0.192691	0.009934	0.304636	0.516556	0.764901	0.996689	0.006623	0.178808	0.506623	0.778146	0.990066	0.003311	0.228477	0.453642	0.695364	1	0.5	0.195364	0.304636	0.07309	0.046512	0.019934	0.003311	0.304636	0.582781	0.824503	1	0.072848	0.142384	0.569536	0.695364	0.887417	0.029801	0.245033	0.377483	0.559603	0.870861	0.427152	0.358804	0.023179	0.235099	0.496689	0.675497	0.950331	0.360927
0.391129	0.403226	0.205645	0.275304	0.190283	0.161943	0.012097	0.306452	0.540323	0.790323	1	0.008065	0.165323	0.5	0.717742	0.959677	0.004032	0.262097	0.423387	0.725806	0.979839	0.762097	0.104839	0.133065	0.040486	0.040486	0	0.004032	0.217742	0.560484	0.75	1	0.048387	0.185484	0.294355	0.350806	0.459677	0.221774	0.25	0.391129	0.895161	0.991935	0.407258	0.380567	0.016129	0.193548	0.395161	0.649194	0.979839	0.483871
0.393862	0.294118	0.31202	0.194872	0.266667	0.2	0.007673	0.232737	0.462916	0.716113	0.997442	0.005115	0.240409	0.534527	0.769821	0.97954	0.002558	0.28133	0.514066	0.734015	1	0.40665	0.396419	0.196931	0.105128	0.053846	0.017949	0.002558	0.245524	0.526854	0.767263	1	0.046036	0.219949	0.501279	0.7289	0.953964	0.007673	0.250639	0.475703	0.887468	0.992327	0.450128	0.405128	0.012788	0.283887	0.521739	0.731458	0.987212	0.329923
0.360489	0.279022	0.360489	0.208163	0.279592	0.2	0.010183	0.252546	0.496945	0.767821	1	0.004073	0.217923	0.486762	0.729124	0.99389	0.002037	0.238289	0.501018	0.743381	0.997963	0.370672	0.124236	0.505092	0.053061	0.085714	0.012245	0.002037	0.160896	0.486762	0.729124	1	0.08554	0.313646	0.503055	0.670061	0.885947	0.008147	0.250509	0.525458	0.771894	0.985743	0.547862	0.453061	0.008147	0.272912	0.501018	0.739308	0.991853	0.285132
0.327526	0.310105	0.362369	0.202797	0.276224	0.230769	0.045296	0.275261	0.54007	0.790941	1	0.006969	0.195122	0.480836	0.66899	0.982578	0.003484	0.25784	0.477352	0.735192	0.993031	0.397213	0.1777	0.425087	0.052448	0.08042	0.003497	0.003484	0.202091	0.529617	0.71777	1	0.006969	0.261324	0.393728	0.595819	0.686411	0.034843	0.240418	0.505226	0.794425	0.961672	0.550523	0.405594	0.006969	0.233449	0.445993	0.658537	0.993031	0.324042
0.340467	0.330739	0.328794	0.206628	0.230019	0.216374	0.009728	0.233463	0.527237	0.741245	0.988327	0.003891	0.287938	0.480545	0.770428	1	0.001946	0.219844	0.474708	0.717899	0.994163	0.429961	0.18677	0.383268	0.072125	0.068226	0.005848	0.001946	0.27821	0.595331	0.784047	1	0.116732	0.268482	0.692607	0.848249	0.980545	0.009728	0.206226	0.414397	0.570039	0.957198	0.461089	0.440546	0.005837	0.264591	0.494163	0.712062	0.994163	0.33463
0.341463	0.341463	0.317073	0.273469	0.195918	0.208163	0.00813	0.215447	0.443089	0.756098	1	0.01626	0.308943	0.528455	0.760163	0.98374	0.004065	0.235772	0.49187	0.719512	0.995935	0.390244	0.012195	0.597561	0.004082	0.142857	0.012245	0.004065	0.378049	0.544715	0.739837	1	0.414634	0.414634	0.414634	0.418699	0.49187	0.012195	0.178862	0.434959	0.752033	0.99187	0.54878	0.408163	0.01626	0.252033	0.50813	0.703252	0.98374	0.353659
0.38439	0.30439	0.31122	0.21582	0.234375	0.188477	0.002927	0.257561	0.523902	0.727805	1	0.001951	0.249756	0.479024	0.738537	0.997073	0.000976	0.232195	0.480976	0.778537	0.996098	0.396098	0.137561	0.466341	0.049805	0.088867	0.004883	0.000976	0.242927	0.44	0.737561	1	0.022439	0.428293	0.767805	0.916098	0.980488	0.007805	0.177561	0.499512	0.674146	0.994146	0.498537	0.398438	0.003902	0.272195	0.48	0.737561	0.995122	0.327805
0.41573	0.2397	0.344569	0.184211	0.255639	0.199248	0.007491	0.247191	0.516854	0.794007	1	0.018727	0.235955	0.531835	0.696629	0.996255	0.003745	0.243446	0.464419	0.715356	0.981273	0.374532	0.183521	0.441948	0.06015	0.097744	0	0.003745	0.157303	0.426966	0.692884	1	0.048689	0.292135	0.404494	0.621723	0.719101	0.018727	0.265918	0.520599	0.82397	0.992509	0.546816	0.398496	0.011236	0.228464	0.464419	0.674157	0.996255	0.265918
0.335227	0.434659	0.230114	0.253561	0.190883	0.165242	0.022727	0.221591	0.451705	0.701705	0.988636	0.005682	0.309659	0.573864	0.809659	1	0.002841	0.184659	0.366477	0.650568	0.963068	0.659091	0.150568	0.190341	0.062678	0.051282	0	0.002841	0.400568	0.627841	0.835227	1	0.019886	0.113636	0.25	0.346591	0.491477	0.056818	0.15625	0.372159	0.525568	0.71875	0.53125	0.393162	0.019886	0.298295	0.571023	0.809659	0.994318	0.454545
0.325967	0.314917	0.359116	0.183333	0.25	0.216667	0.016575	0.171271	0.364641	0.718232	0.977901	0.033149	0.342541	0.59116	0.723757	0.98895	0.005525	0.270718	0.458564	0.740331	1	0.486188	0.292818	0.220994	0.111111	0.055556	0	0.005525	0.237569	0.497238	0.696133	1	0.265193	0.342541	0.635359	0.823204	0.994475	0.099448	0.149171	0.226519	0.552486	0.872928	0.530387	0.411111	0.027624	0.375691	0.563536	0.78453	0.994475	0.337017
0.3125	0.34375	0.34375	0.231579	0.210526	0.263158	0.0625	0.291667	0.520833	0.770833	0.958333	0.020833	0.1875	0.489583	0.739583	1	0.010417	0.239583	0.46875	0.645833	0.979167	0.489583	0.385417	0.125	0.115789	0.052632	0.010526	0.010417	0.40625	0.75	0.875	1	0.125	0.25	0.447917	0.614583	0.739583	0.03125	0.052083	0.083333	0.333333	0.364583	0.541667	0.336842	0.052083	0.270833	0.416667	0.65625	0.979167	0.375
0.363014	0.363014	0.273973	0.255172	0.248276	0.186207	0.013699	0.321918	0.445205	0.739726	1	0.054795	0.246575	0.5	0.678082	0.986301	0.006849	0.191781	0.520548	0.767123	0.972603	0.335616	0.328767	0.335616	0.131034	0.048276	0.006897	0.006849	0.150685	0.561644	0.746575	1	0.013699	0.19863	0.60274	0.883562	0.986301	0.164384	0.321918	0.40411	0.486301	0.821918	0.39726	0.482759	0.020548	0.19863	0.534247	0.732877	0.972603	0.369863
0.51255	0.298547	0.188904	0.30291	0.186508	0.112434	0.005284	0.303831	0.593131	0.804491	0.998679	0.002642	0.180978	0.47424	0.656539	0.990753	0.001321	0.22325	0.380449	0.61823	1	0.677675	0.070013	0.252312	0.026455	0.092593	0	0.001321	0.27609	0.590489	0.792602	1	0.178336	0.228534	0.284016	0.406869	0.459709	0.014531	0.203435	0.391017	0.622193	0.959049	0.245707	0.240741	0.015852	0.198151	0.361955	0.528402	0.984148	0.406869
0.337971	0.437101	0.224928	0.262761	0.166473	0.185615	0.002319	0.290435	0.536232	0.754783	0.998841	0.001159	0.201159	0.418551	0.713623	1	0.00058	0.31942	0.584348	0.766377	0.99942	0.683478	0.045217	0.271304	0.029002	0.056845	0.00232	0.00058	0.195362	0.413913	0.66087	1	0.008696	0.217971	0.312464	0.358261	0.678261	0.014493	0.53913	0.706667	0.903768	0.998841	0.388986	0.360789	0.008696	0.256232	0.569275	0.791884	0.99942	0.443478
0.329624	0.354659	0.315716	0.220056	0.21727	0.233983	0.006954	0.305981	0.567455	0.802503	0.998609	0.002782	0.196106	0.450626	0.714882	0.995828	0.001391	0.225313	0.50904	0.727399	1	0.426982	0.109875	0.463143	0.050139	0.091922	0.005571	0.001391	0.242003	0.421419	0.659249	1	0.082058	0.214186	0.446453	0.535466	0.795549	0.019471	0.260083	0.61057	0.838665	0.987483	0.49235	0.426184	0.005563	0.261474	0.489569	0.668985	0.993046	0.392211
0.348361	0.336066	0.315574	0.246914	0.213992	0.205761	0.016393	0.258197	0.487705	0.709016	0.979508	0.008197	0.180328	0.483607	0.741803	0.995902	0.004098	0.266393	0.5	0.745902	1	0.479508	0.381148	0.139344	0.139918	0.041152	0	0.004098	0.155738	0.536885	0.75	1	0.110656	0.446721	0.594262	0.819672	0.995902	0.028689	0.159836	0.20082	0.241803	0.479508	0.520492	0.386831	0.020492	0.270492	0.52459	0.766393	0.991803	0.352459
0.363529	0.375294	0.261176	0.270907	0.175501	0.204947	0.004706	0.238824	0.417647	0.716471	1	0.002353	0.228235	0.475294	0.732941	0.998824	0.001176	0.331765	0.603529	0.771765	0.996471	0.563529	0.123529	0.312941	0.04947	0.061249	0.002356	0.001176	0.210588	0.351765	0.598824	1	0.009412	0.498824	0.637647	0.758824	0.875294	0.021176	0.485882	0.66	0.884706	0.987059	0.487059	0.374558	0.005882	0.277647	0.556471	0.76	0.996471	0.423529
0.396694	0.198347	0.404959	0.175	0.308333	0.183333	0.016529	0.214876	0.495868	0.694215	0.983471	0.049587	0.280992	0.454545	0.793388	1	0.008264	0.247934	0.479339	0.743802	0.991736	0.214876	0.173554	0.61157	0.066667	0.1	0.016667	0.008264	0.082645	0.396694	0.793388	1	0.024793	0.330579	0.413223	0.743802	0.85124	0.090909	0.231405	0.545455	0.719008	0.983471	0.53719	0.45	0.024793	0.247934	0.454545	0.752066	0.966942	0.157025
0.411576	0.315113	0.273312	0.287097	0.251613	0.151613	0.009646	0.263666	0.530547	0.768489	1	0.061093	0.289389	0.540193	0.810289	0.990354	0.003215	0.202572	0.427653	0.620579	0.974277	0.421222	0.102894	0.475884	0.03871	0.090323	0	0.003215	0.273312	0.633441	0.864952	1	0.366559	0.623794	0.675241	0.951768	0.980707	0.006431	0.205788	0.405145	0.527331	0.823151	0.430868	0.341935	0.006431	0.212219	0.401929	0.569132	0.980707	0.315113
0.356932	0.345133	0.297935	0.249631	0.208272	0.217134	0.004425	0.231563	0.49115	0.772861	0.998525	0.00885	0.264012	0.520649	0.735988	0.99705	0.001475	0.240413	0.476401	0.738938	1	0.449853	0.253687	0.29646	0.090103	0.063516	0.001477	0.001475	0.213864	0.433628	0.727139	1	0.032448	0.160767	0.421829	0.848083	0.958702	0.00885	0.399705	0.59292	0.747788	0.902655	0.533923	0.363368	0.00295	0.265487	0.498525	0.734513	0.958702	0.386431
0.467005	0.294416	0.238579	0.244275	0.193384	0.157761	0.007614	0.203046	0.406091	0.695431	0.992386	0.020305	0.256345	0.525381	0.779188	0.984772	0.002538	0.393401	0.604061	0.77665	1	0.5	0.203046	0.296954	0.061069	0.066158	0.005089	0.002538	0.182741	0.43401	0.72335	1	0.007614	0.634518	0.738579	0.878173	0.964467	0.111675	0.27665	0.370558	0.527919	0.984772	0.393401	0.26972	0.010152	0.48731	0.659898	0.819797	0.977157	0.347716
0.36612	0.273224	0.360656	0.192308	0.296703	0.192308	0.016393	0.256831	0.47541	0.759563	1	0.027322	0.169399	0.437158	0.639344	0.934426	0.005464	0.31694	0.562842	0.781421	0.994536	0.420765	0.42623	0.153005	0.137363	0.049451	0.005495	0.005464	0.213115	0.540984	0.814208	1	0.027322	0.344262	0.508197	0.710383	0.994536	0.103825	0.136612	0.289617	0.644809	0.879781	0.448087	0.494505	0.032787	0.278689	0.502732	0.748634	0.994536	0.311475
0.393782	0.300518	0.305699	0.230104	0.212803	0.186851	0.003454	0.193437	0.490501	0.761658	0.996546	0.013817	0.222798	0.481865	0.770294	1	0.001727	0.319516	0.512953	0.713299	0.979275	0.468048	0.150259	0.381693	0.050173	0.077855	0.00519	0.001727	0.127807	0.352332	0.716753	1	0.005181	0.414508	0.590674	0.713299	0.841105	0.022453	0.340242	0.568221	0.804836	0.989637	0.502591	0.318339	0.005181	0.303972	0.492228	0.708117	0.991364	0.348877
0.376623	0.272727	0.350649	0.184211	0.328947	0.184211	0.064935	0.207792	0.532468	0.714286	1	0.168831	0.363636	0.467532	0.74026	0.974026	0.012987	0.12987	0.376623	0.636364	0.948052	0.311688	0.272727	0.415584	0.105263	0.052632	0	0.012987	0.25974	0.428571	0.597403	1	0.051948	0.376623	0.493506	0.558442	0.675325	0.090909	0.181818	0.766234	0.87013	0.974026	0.441558	0.421053	0.051948	0.233766	0.493506	0.662338	0.948052	0.272727
0.326336	0.387405	0.28626	0.23327	0.160612	0.229446	0.017176	0.278626	0.562977	0.839695	0.992366	0.003817	0.198473	0.492366	0.73855	0.998092	0.001908	0.253817	0.444656	0.650763	1	0.454198	0.076336	0.469466	0.024857	0.07457	0.005736	0.001908	0.259542	0.620229	0.841603	1	0.05916	0.175573	0.206107	0.59542	0.803435	0.005725	0.312977	0.482824	0.650763	0.98855	0.526718	0.305927	0.007634	0.242366	0.484733	0.667939	0.996183	0.417939
0.363636	0.222222	0.414141	0.152284	0.335025	0.182741	0.010101	0.232323	0.409091	0.69697	0.994949	0.035354	0.212121	0.545455	0.777778	0.989899	0.005051	0.267677	0.540404	0.742424	1	0.40404	0.212121	0.383838	0.071066	0.091371	0.020305	0.005051	0.141414	0.5	0.681818	1	0.045455	0.217172	0.570707	0.89899	0.989899	0.186869	0.338384	0.439394	0.757576	0.919192	0.464646	0.436548	0.045455	0.343434	0.505051	0.727273	0.984848	0.161616
0.438776	0.255102	0.306122	0.268041	0.309278	0.123711	0.030612	0.193878	0.530612	0.714286	0.989796	0.081633	0.295918	0.428571	0.673469	0.979592	0.010204	0.22449	0.469388	0.755102	1	0.459184	0.408163	0.132653	0.092784	0.051546	0.010309	0.010204	0.193878	0.602041	0.714286	1	0.204082	0.336735	0.5	0.72449	0.908163	0.061224	0.081633	0.132653	0.918367	0.959184	0.336735	0.453608	0.040816	0.27551	0.44898	0.734694	0.969388	0.234694
0.378788	0.32197	0.299242	0.231499	0.214421	0.201139	0.003788	0.17803	0.410985	0.714015	1	0.017045	0.219697	0.450758	0.727273	0.996212	0.001894	0.420455	0.600379	0.778409	0.998106	0.549242	0.142045	0.308712	0.051233	0.062619	0.005693	0.001894	0.136364	0.278409	0.619318	1	0.214015	0.524621	0.67803	0.844697	0.9375	0.295455	0.44697	0.604167	0.808712	0.994318	0.488636	0.349146	0.00947	0.390152	0.57197	0.791667	0.994318	0.340909
0.376344	0.301075	0.322581	0.206522	0.271739	0.23913	0.032258	0.236559	0.462366	0.688172	0.903226	0.021505	0.247312	0.537634	0.892473	1	0.010753	0.182796	0.44086	0.666667	0.978495	0.494624	0.301075	0.204301	0.097826	0.032609	0.01087	0.010753	0.236559	0.645161	0.795699	1	0.11828	0.290323	0.569892	0.688172	0.88172	0.150538	0.182796	0.376344	0.430108	0.483871	0.365591	0.434783	0.043011	0.172043	0.44086	0.591398	0.978495	0.290323
0.356269	0.351682	0.292049	0.222052	0.189893	0.212864	0.007645	0.321101	0.629969	0.847095	1	0.003058	0.212538	0.437309	0.678899	0.995413	0.001529	0.224771	0.443425	0.66208	0.996942	0.397554	0.134557	0.46789	0.052067	0.101072	0.006126	0.001529	0.215596	0.507645	0.764526	1	0.087156	0.255352	0.392966	0.544343	0.79052	0.025994	0.2737	0.551988	0.821101	0.990826	0.481651	0.367534	0.015291	0.203364	0.425076	0.616208	0.996942	0.368502
0.360759	0.316456	0.322785	0.229299	0.242038	0.197452	0.018987	0.234177	0.468354	0.753165	0.993671	0.012658	0.208861	0.518987	0.71519	1	0.006329	0.265823	0.474684	0.746835	0.987342	0.341772	0.139241	0.518987	0.050955	0.089172	0.012739	0.006329	0.082278	0.436709	0.721519	1	0.462025	0.487342	0.544304	0.949367	0.987342	0.126582	0.265823	0.417722	0.734177	0.943038	0.481013	0.458599	0.044304	0.278481	0.550633	0.759494	0.987342	0.291139
0.411215	0.299065	0.28972	0.320755	0.283019	0.150943	0.046729	0.280374	0.514019	0.738318	0.981308	0.018692	0.233645	0.429907	0.728972	0.953271	0.009346	0.205607	0.504673	0.757009	1	0.504673	0.252336	0.242991	0.113208	0.056604	0	0.009346	0.121495	0.439252	0.794393	1	0.373832	0.420561	0.663551	0.859813	0.971963	0.168224	0.271028	0.336449	0.514019	0.579439	0.364486	0.415094	0.037383	0.242991	0.420561	0.654206	0.971963	0.280374
0.306383	0.32766	0.365957	0.213675	0.230769	0.230769	0.029787	0.26383	0.582979	0.812766	0.987234	0.008511	0.238298	0.421277	0.689362	0.995745	0.004255	0.221277	0.493617	0.72766	1	0.438298	0.374468	0.187234	0.136752	0.051282	0.017094	0.004255	0.246809	0.468085	0.67234	1	0.008511	0.170213	0.331915	0.574468	0.804255	0.391489	0.719149	0.86383	0.919149	0.965957	0.561702	0.350427	0.008511	0.27234	0.510638	0.72766	0.948936	0.357447
0.272849	0.467742	0.259409	0.22611	0.164199	0.230148	0.009409	0.307796	0.567204	0.748656	0.995968	0.004032	0.181452	0.392473	0.724462	1	0.001344	0.358871	0.571237	0.762097	0.991935	0.646505	0.120968	0.232527	0.047106	0.063257	0.004038	0.001344	0.18414	0.408602	0.776882	1	0.094086	0.525538	0.668011	0.737903	0.979839	0.163978	0.372312	0.538978	0.700269	0.97043	0.478495	0.374159	0.033602	0.194892	0.549731	0.754032	0.990591	0.452957
0.37931	0.352087	0.268603	0.285455	0.198182	0.183636	0.00726	0.255898	0.537205	0.749546	0.994555	0.00363	0.232305	0.408348	0.709619	0.998185	0.001815	0.248639	0.53539	0.767695	1	0.540835	0.14882	0.310345	0.061818	0.065455	0.003636	0.001815	0.252269	0.439201	0.747731	1	0.041742	0.23775	0.491833	0.588022	0.807623	0.018149	0.274047	0.640653	0.833031	0.978221	0.459165	0.338182	0.010889	0.283122	0.586207	0.780399	0.983666	0.37931
0.37247	0.303644	0.323887	0.22027	0.240541	0.214865	0.004049	0.288799	0.54386	0.784076	1	0.005398	0.194332	0.450742	0.721997	0.995951	0.00135	0.245614	0.48583	0.735493	0.99865	0.411606	0.167341	0.421053	0.07973	0.078378	0.002703	0.00135	0.306343	0.489879	0.804318	0.99865	0.004049	0.17004	0.34278	0.900135	1	0.025641	0.268556	0.541161	0.678812	0.932524	0.51552	0.378378	0.005398	0.249663	0.466937	0.680162	0.99865	0.300945
0.262948	0.430279	0.306773	0.205589	0.165669	0.269461	0.00996	0.260956	0.569721	0.762948	0.992032	0.003984	0.233068	0.448207	0.760956	0.998008	0.001992	0.272908	0.523904	0.723108	1	0.464143	0.053785	0.482072	0.031936	0.087824	0	0.001992	0.223108	0.50996	0.826693	1	0.005976	0.103586	0.207171	0.958167	0.978088	0.031873	0.330677	0.498008	0.667331	0.918327	0.507968	0.359281	0.005976	0.298805	0.494024	0.669323	0.99004	0.444223
0.402801	0.382208	0.214992	0.295136	0.169827	0.15169	0.002471	0.177924	0.401153	0.706755	0.995881	0.001647	0.228171	0.454695	0.71911	0.998353	0.000824	0.484349	0.654036	0.83196	1	0.651565	0.158155	0.19028	0.061006	0.029678	0.001649	0.000824	0.162273	0.325371	0.652389	1	0.341021	0.453871	0.642504	0.810544	0.999176	0.367381	0.522241	0.699341	0.859143	0.987644	0.381384	0.253916	0.093081	0.490115	0.694399	0.85173	0.999176	0.367381
0.383065	0.245968	0.370968	0.174089	0.283401	0.198381	0.012097	0.258065	0.528226	0.802419	1	0.028226	0.205645	0.459677	0.677419	0.995968	0.004032	0.237903	0.487903	0.71371	0.979839	0.383065	0.197581	0.419355	0.05668	0.089069	0.008097	0.004032	0.165323	0.419355	0.693548	1	0.133065	0.314516	0.403226	0.620968	0.725806	0.024194	0.266129	0.524194	0.83871	0.987903	0.568548	0.421053	0.016129	0.237903	0.46371	0.677419	0.979839	0.258065
0.346405	0.366013	0.287582	0.243421	0.203947	0.236842	0.026144	0.313725	0.464052	0.751634	0.980392	0.013072	0.222222	0.477124	0.718954	1	0.006536	0.215686	0.535948	0.777778	0.973856	0.359477	0.30719	0.333333	0.125	0.046053	0.006579	0.006536	0.117647	0.503268	0.751634	1	0.026144	0.248366	0.614379	0.888889	0.986928	0.176471	0.326797	0.411765	0.647059	0.830065	0.392157	0.486842	0.03268	0.215686	0.535948	0.745098	0.973856	0.379085
0.387931	0.344828	0.267241	0.26087	0.156522	0.147826	0.017241	0.189655	0.387931	0.715517	0.974138	0.025862	0.284483	0.612069	0.853448	1	0.008621	0.232759	0.413793	0.560345	0.844828	0.715517	0.077586	0.206897	0.052174	0.052174	0	0.008621	0.284483	0.603448	0.784483	1	0.362069	0.517241	0.534483	0.948276	0.974138	0.155172	0.198276	0.25	0.431034	0.482759	0.232759	0.173913	0.094828	0.318966	0.422414	0.5	0.767241	0.37931
0.323944	0.341549	0.334507	0.183746	0.222615	0.268551	0.010563	0.34507	0.542254	0.795775	1	0.007042	0.190141	0.380282	0.679577	0.989437	0.003521	0.214789	0.528169	0.753521	0.996479	0.475352	0.179577	0.34507	0.056537	0.070671	0.007067	0.003521	0.302817	0.59507	0.84507	1	0.010563	0.070423	0.228873	0.56338	0.883803	0.098592	0.278169	0.454225	0.725352	0.975352	0.507042	0.438163	0.014085	0.207746	0.433099	0.683099	0.985915	0.352113
0.372937	0.323432	0.30363	0.219835	0.213223	0.219835	0.006601	0.29868	0.610561	0.841584	0.988449	0.0033	0.221122	0.442244	0.706271	0.99835	0.00165	0.235974	0.432343	0.660066	1	0.40429	0.128713	0.466997	0.046281	0.105785	0.006612	0.00165	0.280528	0.542904	0.785479	1	0.067657	0.222772	0.382838	0.519802	0.948845	0.00495	0.239274	0.49835	0.737624	0.988449	0.5	0.366942	0.00495	0.19802	0.430693	0.630363	0.9967	0.351485
0.351598	0.410959	0.237443	0.284404	0.169725	0.155963	0.027397	0.237443	0.479452	0.721461	1	0.009132	0.242009	0.56621	0.780822	0.990868	0.004566	0.26484	0.474886	0.643836	0.876712	0.447489	0.077626	0.474886	0.045872	0.073394	0	0.004566	0.287671	0.561644	0.780822	1	0.045662	0.639269	0.666667	0.694064	0.744292	0.086758	0.219178	0.401826	0.60274	0.917808	0.420091	0.40367	0.050228	0.269406	0.520548	0.675799	0.90411	0.369863
0.483221	0.278523	0.238255	0.228956	0.232323	0.141414	0.013423	0.197987	0.496644	0.761745	1	0.006711	0.248322	0.520134	0.795302	0.996644	0.003356	0.291946	0.479866	0.677852	0.939597	0.520134	0.134228	0.345638	0.047138	0.080808	0.013468	0.003356	0.157718	0.449664	0.738255	1	0.325503	0.456376	0.61745	0.674497	0.919463	0.013423	0.278523	0.503356	0.802013	0.95302	0.305369	0.296296	0.020134	0.318792	0.459732	0.66443	0.942953	0.338926
0.353033	0.33437	0.312597	0.224299	0.23676	0.211838	0.004666	0.203733	0.466563	0.696734	0.998445	0.00311	0.283048	0.536547	0.765163	0.99689	0.001555	0.227061	0.517885	0.760498	1	0.407465	0.066874	0.525661	0.029595	0.104361	0.001558	0.001555	0.292379	0.55832	0.810264	1	0.060653	0.11042	0.744946	0.88647	0.970451	0.00311	0.242613	0.458787	0.645412	0.993779	0.556765	0.392523	0.007776	0.255054	0.544323	0.77916	0.992224	0.362364
0.382609	0.365217	0.252174	0.27193	0.219298	0.105263	0.017391	0.234783	0.426087	0.695652	0.973913	0.113043	0.382609	0.652174	0.852174	1	0.008696	0.104348	0.356522	0.6	0.913043	0.443478	0.478261	0.078261	0.175439	0.017544	0	0.008696	0.165217	0.452174	0.678261	1	0.069565	0.217391	0.382609	0.695652	0.878261	0.913043	0.921739	0.93913	0.956522	0.982609	0.443478	0.333333	0.026087	0.226087	0.495652	0.626087	0.965217	0.408696
0.380952	0.35119	0.267857	0.298507	0.18806	0.173134	0.008929	0.232143	0.517857	0.800595	1	0.005952	0.270833	0.508929	0.75	0.994048	0.002976	0.238095	0.443452	0.642857	0.97619	0.443452	0.172619	0.383929	0.080597	0.074627	0.002985	0.002976	0.247024	0.544643	0.803571	1	0.074405	0.202381	0.494048	0.642857	0.931548	0.008929	0.264881	0.46131	0.71131	0.982143	0.369048	0.4	0.014881	0.247024	0.443452	0.645833	0.985119	0.369048
0.369919	0.325203	0.304878	0.261224	0.24898	0.187755	0.00813	0.235772	0.54065	0.764228	1	0.020325	0.276423	0.52439	0.796748	0.98374	0.004065	0.227642	0.422764	0.646341	0.97561	0.296748	0.121951	0.581301	0.032653	0.097959	0	0.004065	0.162602	0.406504	0.654472	1	0.414634	0.735772	0.784553	0.813008	0.853659	0.01626	0.239837	0.487805	0.670732	0.99187	0.487805	0.35102	0.028455	0.235772	0.430894	0.654472	0.97561	0.292683
0.347239	0.309202	0.343558	0.197789	0.275184	0.224816	0.002454	0.257669	0.51411	0.768098	1	0.004908	0.242945	0.450307	0.744785	0.996319	0.001227	0.239264	0.506748	0.733742	0.997546	0.480982	0.226994	0.292025	0.092138	0.052826	0.003686	0.001227	0.225767	0.426994	0.732515	1	0.038037	0.251534	0.43681	0.801227	0.997546	0.006135	0.310429	0.581595	0.711656	0.992638	0.557055	0.385749	0.003681	0.262577	0.48589	0.743558	0.997546	0.331288
0.307087	0.401575	0.291339	0.27668	0.15415	0.245059	0.043307	0.220472	0.519685	0.755906	1	0.007874	0.275591	0.507874	0.771654	0.988189	0.003937	0.23622	0.472441	0.669291	0.992126	0.326772	0.102362	0.570866	0.039526	0.102767	0	0.003937	0.188976	0.448819	0.767717	1	0.011811	0.031496	0.80315	0.858268	0.893701	0.070866	0.295276	0.492126	0.649606	0.988189	0.503937	0.339921	0.011811	0.259843	0.437008	0.649606	0.992126	0.409449
0.381275	0.367707	0.251018	0.258152	0.177989	0.157609	0.006784	0.213026	0.518318	0.791045	1	0.004071	0.229308	0.458616	0.709634	0.998643	0.001357	0.299864	0.523745	0.724559	0.997286	0.400271	0.024423	0.575305	0.009511	0.099185	0.001359	0.001357	0.105834	0.459973	0.815468	1	0.056988	0.061058	0.876526	0.881954	0.924016	0.157395	0.327001	0.506106	0.690638	0.993216	0.431479	0.347826	0.016282	0.332429	0.503392	0.693351	0.994573	0.393487
0.354037	0.515528	0.130435	0.45625	0.06875	0.15625	0.018634	0.329193	0.627329	0.782609	0.981366	0.012422	0.204969	0.453416	0.732919	0.993789	0.006211	0.136646	0.360248	0.490683	1	1	0	0	0	0	0	0.006211	0.248447	0.496894	0.745342	1	0	0	0	0	0	0	0	0	0	0	0.291925	0.475	0.031056	0.198758	0.453416	0.714286	0.956522	0.552795
0.421053	0.294737	0.284211	0.255319	0.234043	0.170213	0.021053	0.315789	0.642105	0.821053	0.989474	0.052632	0.273684	0.452632	0.621053	0.957895	0.010526	0.157895	0.368421	0.578947	1	0.6	0.263158	0.136842	0.085106	0.06383	0	0.010526	0.294737	0.505263	0.8	1	0.094737	0.147368	0.252632	0.368421	0.557895	0.610526	0.631579	0.663158	0.694737	0.968421	0.336842	0.340426	0.042105	0.178947	0.389474	0.484211	0.968421	0.336842
0.386667	0.32	0.293333	0.208054	0.288591	0.194631	0.013333	0.273333	0.42	0.706667	0.993333	0.04	0.24	0.58	0.793333	0.986667	0.006667	0.206667	0.513333	0.766667	1	0.36	0.306667	0.333333	0.127517	0.04698	0.006711	0.006667	0.14	0.553333	0.746667	1	0.013333	0.24	0.606667	0.88	0.98	0.166667	0.32	0.406667	0.633333	0.82	0.386667	0.469799	0.02	0.2	0.526667	0.733333	0.966667	0.306667
0.384058	0.34058	0.275362	0.255474	0.211679	0.19708	0.036232	0.23913	0.514493	0.789855	0.992754	0.014493	0.231884	0.463768	0.681159	0.978261	0.007246	0.217391	0.456522	0.652174	1	0.391304	0.195652	0.413043	0.072993	0.072993	0	0.007246	0.181159	0.413043	0.688406	1	0.144928	0.326087	0.376812	0.586957	0.65942	0.014493	0.275362	0.557971	0.789855	0.942029	0.355072	0.350365	0.021739	0.253623	0.442029	0.637681	0.971014	0.318841
0.347619	0.457143	0.195238	0.296651	0.177033	0.162679	0.014286	0.271429	0.485714	0.709524	1	0.009524	0.190476	0.42381	0.704762	0.985714	0.004762	0.409524	0.671429	0.828571	0.990476	0.542857	0.128571	0.328571	0.057416	0.095694	0.009569	0.004762	0.304762	0.471429	0.619048	1	0.219048	0.671429	0.833333	0.880952	0.995238	0.038095	0.114286	0.271429	0.757143	0.966667	0.342857	0.392344	0.090476	0.404762	0.580952	0.771429	0.990476	0.461905
0.295652	0.42029	0.284058	0.209572	0.183466	0.211748	0.002174	0.206522	0.433333	0.672464	0.994203	0.001449	0.269565	0.595652	0.868116	1	0.000725	0.268116	0.471739	0.675362	0.991304	0.534783	0.12971	0.335507	0.052937	0.06599	0.003626	0.000725	0.242754	0.555797	0.86087	1	0.015217	0.299275	0.476087	0.562319	0.985507	0.002899	0.245652	0.464493	0.657971	0.826087	0.601449	0.31037	0.002899	0.324638	0.57971	0.845652	0.998551	0.418841
0.331126	0.331126	0.337748	0.246667	0.22	0.213333	0.013245	0.231788	0.443709	0.695364	0.993377	0.05298	0.225166	0.456954	0.688742	1	0.006623	0.245033	0.543046	0.794702	0.97351	0.370861	0.298013	0.331126	0.126667	0.046667	0.006667	0.006623	0.145695	0.562914	0.774834	1	0.013245	0.238411	0.596026	0.860927	0.960265	0.165563	0.317881	0.403974	0.483444	0.807947	0.384106	0.466667	0.019868	0.198675	0.523179	0.721854	0.953642	0.377483
0.391892	0.297297	0.310811	0.205479	0.164384	0.232877	0.040541	0.202703	0.378378	0.554054	1	0.027027	0.162162	0.621622	0.756757	0.986486	0.013514	0.22973	0.5	0.77027	0.932432	0.567568	0.067568	0.364865	0.082192	0.054795	0	0.013514	0.135135	0.445946	0.594595	1	0.148649	0.148649	0.243243	0.256757	0.5	0.324324	0.391892	0.689189	0.783784	0.878378	0.405405	0.465753	0.081081	0.351351	0.621622	0.810811	0.932432	0.297297
0.3375	0.370833	0.291667	0.23431	0.150628	0.225941	0.020833	0.233333	0.541667	0.783333	0.9875	0.016667	0.1875	0.408333	0.679167	0.995833	0.004167	0.308333	0.5375	0.729167	1	0.541667	0.2125	0.245833	0.062762	0.062762	0.012552	0.004167	0.15	0.2875	0.579167	1	0.008333	0.3875	0.591667	0.783333	0.995833	0.120833	0.441667	0.670833	0.8375	0.95	0.425	0.343096	0.0125	0.404167	0.575	0.7375	0.991667	0.408333
0.360775	0.271186	0.368039	0.196602	0.240291	0.201456	0.012107	0.249395	0.532688	0.774818	0.987893	0.004843	0.239709	0.472155	0.699758	0.990315	0.002421	0.251816	0.486683	0.753027	1	0.358354	0.138015	0.503632	0.082524	0.106796	0.004854	0.002421	0.208232	0.539952	0.813559	1	0.038741	0.16707	0.513317	0.917676	0.997579	0.007264	0.25908	0.464891	0.702179	0.951574	0.583535	0.373786	0.007264	0.242131	0.457627	0.677966	0.995157	0.268765
0.413793	0.37931	0.206897	0.288184	0.149856	0.18732	0.011494	0.29023	0.482759	0.772989	0.971264	0.005747	0.238506	0.5	0.744253	1	0.002874	0.215517	0.436782	0.718391	0.994253	0.482759	0.20977	0.307471	0.074928	0.086455	0	0.002874	0.158046	0.408046	0.695402	1	0.126437	0.270115	0.594828	0.718391	0.994253	0.008621	0.310345	0.531609	0.795977	0.95977	0.399425	0.334294	0.020115	0.270115	0.531609	0.75	0.994253	0.41954
0.387097	0.38172	0.231183	0.2	0.227027	0.145946	0.010753	0.177419	0.424731	0.591398	1	0.043011	0.317204	0.55914	0.768817	0.994624	0.005376	0.258065	0.586022	0.822581	0.978495	0.596774	0.043011	0.360215	0.027027	0.081081	0.005405	0.005376	0.290323	0.44086	0.801075	1	0.268817	0.274194	0.72043	0.833333	0.844086	0.032258	0.177419	0.483871	0.586022	0.978495	0.344086	0.410811	0.026882	0.258065	0.564516	0.795699	0.978495	0.419355
0.519048	0.309524	0.171429	0.358852	0.196172	0.105263	0.014286	0.338095	0.604762	0.8	0.995238	0.009524	0.22381	0.404762	0.62381	1	0.004762	0.157143	0.357143	0.595238	0.980952	0.690476	0.142857	0.166667	0.047847	0.028708	0.009569	0.004762	0.480952	0.652381	0.82381	1	0.028571	0.057143	0.247619	0.309524	0.452381	0.090476	0.12381	0.166667	0.37619	0.433333	0.238095	0.191388	0.033333	0.119048	0.252381	0.357143	0.447619	0.328571
0.375	0.306818	0.318182	0.252874	0.229885	0.16092	0.034091	0.238636	0.477273	0.647727	0.988636	0.022727	0.193182	0.534091	0.727273	0.965909	0.011364	0.284091	0.465909	0.761364	1	0.454545	0.511364	0.034091	0.114943	0.022989	0.022989	0.011364	0.215909	0.556818	0.670455	1	0.102273	0.284091	0.477273	0.738636	0.988636	0.045455	0.045455	0.045455	0.943182	0.954545	0.363636	0.45977	0.125	0.272727	0.465909	0.761364	0.965909	0.284091
0.412791	0.319767	0.267442	0.233918	0.210526	0.204678	0.017442	0.296512	0.494186	0.755814	0.994186	0.011628	0.22093	0.569767	0.819767	1	0.005814	0.174419	0.401163	0.593023	0.848837	0.517442	0.075581	0.406977	0.035088	0.105263	0	0.005814	0.325581	0.540698	0.77907	1	0.133721	0.145349	0.162791	0.180233	0.837209	0.023256	0.238372	0.395349	0.645349	0.947674	0.389535	0.362573	0.040698	0.174419	0.383721	0.610465	0.848837	0.331395
0.331288	0.323108	0.345603	0.196721	0.221311	0.239754	0.00818	0.155419	0.453988	0.744376	0.997955	0.00409	0.267894	0.476483	0.762781	1	0.002045	0.306748	0.535787	0.725971	0.989775	0.486708	0.167689	0.345603	0.063525	0.071721	0.006148	0.002045	0.128834	0.321063	0.650307	1	0.014315	0.425358	0.631902	0.764826	0.9182	0.01227	0.382413	0.560327	0.785276	0.99182	0.523517	0.364754	0.006135	0.333333	0.525562	0.766871	0.97955	0.359918
0.385925	0.360953	0.253121	0.252273	0.177273	0.184091	0.00454	0.284904	0.627696	0.819523	0.998865	0.00227	0.211124	0.473326	0.711691	0.99319	0.001135	0.250851	0.417707	0.62202	1	0.500568	0.112372	0.38706	0.045455	0.079545	0.006818	0.001135	0.160045	0.494892	0.816118	1	0.095346	0.273553	0.385925	0.497162	0.860386	0.111237	0.300795	0.54143	0.683314	0.979569	0.402951	0.320455	0.003405	0.22815	0.401816	0.587968	0.99546	0.38706
0.330855	0.360595	0.30855	0.208955	0.208955	0.227612	0.01487	0.178439	0.431227	0.70632	0.992565	0.007435	0.297398	0.546468	0.810409	1	0.003717	0.260223	0.505576	0.69145	0.98513	0.457249	0.200743	0.342007	0.093284	0.070896	0.011194	0.003717	0.289963	0.505576	0.851301	1	0.122677	0.315985	0.486989	0.672862	0.907063	0.011152	0.104089	0.449814	0.713755	0.914498	0.531599	0.395522	0.02974	0.315985	0.498141	0.69145	0.98513	0.405204
0.447761	0.291045	0.261194	0.285714	0.24812	0.090226	0.052239	0.268657	0.537313	0.738806	1	0.014925	0.134328	0.402985	0.716418	0.992537	0.007463	0.19403	0.455224	0.746269	0.977612	0.470149	0.485075	0.044776	0.150376	0.015038	0	0.007463	0.335821	0.597015	0.80597	1	0.014925	0.164179	0.365672	0.58209	0.880597	0.947761	0.947761	0.962687	0.970149	0.985075	0.358209	0.43609	0.014925	0.19403	0.402985	0.589552	0.962687	0.291045
0.306748	0.431493	0.261759	0.260246	0.157787	0.22541	0.01227	0.237219	0.478528	0.756646	0.993865	0.00409	0.282209	0.552147	0.799591	1	0.002045	0.208589	0.443763	0.654397	0.99591	0.456033	0.0818	0.462168	0.030738	0.071721	0.006148	0.002045	0.247444	0.631902	0.875256	1	0.06135	0.198364	0.415133	0.640082	0.9182	0.006135	0.265849	0.476483	0.613497	0.936605	0.531697	0.307377	0.00818	0.229039	0.474438	0.683027	0.99591	0.451943
0.35119	0.392857	0.255952	0.250373	0.187779	0.183308	0.005952	0.25744	0.488095	0.738095	0.985119	0.004464	0.241071	0.525298	0.779762	1	0.001488	0.25	0.467262	0.699405	0.998512	0.64881	0.169643	0.181548	0.065574	0.068554	0	0.001488	0.27381	0.544643	0.809524	1	0.052083	0.18006	0.333333	0.540179	0.885417	0.06994	0.306548	0.495536	0.696429	0.973214	0.508929	0.354694	0.00744	0.315476	0.592262	0.808036	0.994048	0.388393
0.427184	0.330097	0.242718	0.303922	0.127451	0.176471	0.029126	0.165049	0.339806	0.621359	0.873786	0.019417	0.223301	0.582524	0.796117	1	0.009709	0.38835	0.563107	0.786408	0.990291	0.679612	0.029126	0.291262	0.039216	0.058824	0	0.009709	0.194175	0.368932	0.640777	1	0.446602	0.446602	0.446602	0.456311	0.631068	0.048544	0.533981	0.757282	0.825243	0.902913	0.320388	0.333333	0.359223	0.504854	0.650485	0.825243	0.941748	0.359223
0.277027	0.405405	0.317568	0.258503	0.163265	0.285714	0.033784	0.175676	0.371622	0.662162	0.986486	0.013514	0.358108	0.533784	0.783784	0.993243	0.006757	0.202703	0.506757	0.716216	1	0.445946	0.256757	0.297297	0.081633	0.054422	0.013605	0.006757	0.216216	0.452703	0.797297	1	0.175676	0.263514	0.689189	0.824324	0.97973	0.060811	0.128378	0.5	0.594595	0.668919	0.655405	0.244898	0.060811	0.331081	0.540541	0.716216	0.97973	0.358108
0.297189	0.369478	0.333333	0.229839	0.21371	0.258065	0.012048	0.26506	0.574297	0.815261	0.995984	0.008032	0.200803	0.425703	0.690763	1	0.004016	0.248996	0.506024	0.710843	0.951807	0.457831	0.321285	0.220884	0.108871	0.068548	0.004032	0.004016	0.220884	0.457831	0.682731	1	0.024096	0.180723	0.321285	0.526104	0.783133	0.405622	0.662651	0.835341	0.899598	0.955823	0.550201	0.330645	0.028112	0.269076	0.502008	0.706827	0.951807	0.365462
0.339286	0.428571	0.232143	0.254545	0.218182	0.236364	0.053571	0.214286	0.375	0.785714	0.982143	0.035714	0.160714	0.464286	0.714286	1	0.017857	0.339286	0.482143	0.660714	0.964286	0.714286	0.160714	0.125	0.109091	0.072727	0	0.017857	0.25	0.553571	0.767857	1	0.285714	0.303571	0.446429	0.482143	0.607143	0.089286	0.089286	0.125	0.875	0.910714	0.25	0.472727	0.267857	0.339286	0.517857	0.696429	0.964286	0.446429
0.390572	0.446128	0.1633	0.269815	0.136594	0.141653	0.008418	0.265993	0.537037	0.821549	1	0.003367	0.250842	0.513468	0.708754	0.998316	0.001684	0.215488	0.363636	0.572391	0.838384	0.698653	0.080808	0.220539	0.047218	0.077572	0	0.001684	0.249158	0.510101	0.717172	1	0.055556	0.217172	0.388889	0.538721	0.686869	0.008418	0.265993	0.5	0.845118	0.905724	0.294613	0.306914	0.010101	0.205387	0.355219	0.60101	0.867003	0.469697
0.298182	0.386667	0.315152	0.228155	0.218447	0.253641	0.002424	0.254545	0.515152	0.763636	0.998788	0.004848	0.250909	0.490909	0.739394	1	0.001212	0.233939	0.484848	0.726061	0.997576	0.483636	0.233939	0.282424	0.105583	0.054612	0.003641	0.001212	0.206061	0.459394	0.738182	1	0.002424	0.254545	0.419394	0.752727	0.997576	0.006061	0.317576	0.585455	0.773333	0.991515	0.566061	0.38835	0.003636	0.266667	0.476364	0.744242	0.997576	0.412121
0.31411	0.364417	0.321472	0.210074	0.246929	0.230958	0.002454	0.280982	0.531288	0.757055	0.998773	0.004908	0.235583	0.480982	0.746012	1	0.001227	0.238037	0.493252	0.748466	0.997546	0.46135	0.245399	0.293252	0.095823	0.061425	0.004914	0.001227	0.207362	0.457669	0.728834	1	0.039264	0.257669	0.422086	0.809816	0.997546	0.006135	0.320245	0.573006	0.732515	0.991411	0.561963	0.415233	0.003681	0.257669	0.469939	0.739877	0.997546	0.402454
0.373239	0.366197	0.260563	0.276596	0.212766	0.120567	0.014085	0.267606	0.542254	0.760563	1	0.021127	0.28169	0.492958	0.866197	0.992958	0.007042	0.161972	0.338028	0.570423	0.746479	0.443662	0.197183	0.359155	0.070922	0.099291	0.014184	0.007042	0.309859	0.669014	0.859155	1	0.028169	0.070423	0.34507	0.43662	0.647887	0.112676	0.190141	0.528169	0.732394	0.943662	0.380282	0.340426	0.028169	0.161972	0.408451	0.556338	0.943662	0.246479
0.385396	0.273834	0.340771	0.207317	0.26626	0.191057	0.008114	0.247465	0.488844	0.758621	1	0.004057	0.245436	0.541582	0.74645	0.991886	0.002028	0.237323	0.470588	0.724138	0.98783	0.25355	0.083164	0.663286	0.026423	0.067073	0.006098	0.002028	0.383367	0.647059	0.805274	1	0.320487	0.375254	0.444219	0.965517	0.98783	0.008114	0.180527	0.466531	0.669371	0.945233	0.51927	0.426829	0.010142	0.31643	0.541582	0.760649	0.98783	0.281947
0.413534	0.270677	0.315789	0.242424	0.212121	0.128788	0.030075	0.240602	0.556391	0.796992	0.992481	0.022556	0.225564	0.413534	0.578947	1	0.007519	0.255639	0.503759	0.699248	0.984962	0.270677	0.360902	0.368421	0.045455	0.075758	0.015152	0.007519	0.120301	0.330827	0.609023	1	0.150376	0.669173	0.759398	0.864662	0.954887	0.052632	0.263158	0.383459	0.518797	0.977444	0.406015	0.424242	0.150376	0.300752	0.511278	0.699248	0.93985	0.300752
0.444149	0.295213	0.260638	0.232	0.218667	0.162667	0.005319	0.271277	0.505319	0.707447	1	0.023936	0.231383	0.478723	0.765957	0.99734	0.00266	0.199468	0.489362	0.800532	0.986702	0.513298	0.279255	0.207447	0.090667	0.058667	0.005333	0.00266	0.327128	0.515957	0.720745	1	0.029255	0.175532	0.300532	0.864362	0.984043	0.007979	0.412234	0.587766	0.773936	0.837766	0.430851	0.336	0.021277	0.207447	0.361702	0.81383	0.986702	0.332447
0.339623	0.372642	0.287736	0.251185	0.241706	0.189573	0.009434	0.212264	0.448113	0.764151	0.990566	0.04717	0.330189	0.504717	0.712264	1	0.004717	0.174528	0.518868	0.75	0.971698	0.537736	0.141509	0.320755	0.075829	0.066351	0	0.004717	0.264151	0.400943	0.688679	1	0.014151	0.066038	0.589623	0.731132	0.915094	0.09434	0.20283	0.556604	0.787736	0.976415	0.509434	0.369668	0.014151	0.34434	0.528302	0.768868	0.971698	0.40566
0.330909	0.485455	0.183636	0.315118	0.142077	0.143898	0.005455	0.236364	0.452727	0.656364	1	0.003636	0.310909	0.650909	0.838182	0.998182	0.001818	0.167273	0.325455	0.470909	0.869091	0.732727	0.147273	0.12	0.063752	0.034608	0.001821	0.001818	0.338182	0.629091	0.816364	1	0.098182	0.169091	0.256364	0.383636	0.705455	0.047273	0.083636	0.327273	0.476364	0.534545	0.358182	0.31694	0.052727	0.234545	0.387273	0.732727	0.985455	0.496364
0.411111	0.244444	0.344444	0.213483	0.280899	0.202247	0.044444	0.211111	0.511111	0.733333	0.977778	0.022222	0.222222	0.5	0.744444	1	0.011111	0.233333	0.411111	0.7	0.988889	0.3	0.344444	0.355556	0.078652	0.033708	0.011236	0.011111	0.066667	0.177778	0.811111	1	0.088889	0.411111	0.733333	0.888889	0.977778	0.188889	0.266667	0.5	0.588889	0.677778	0.444444	0.404494	0.033333	0.266667	0.433333	0.711111	0.955556	0.255556
0.368715	0.340782	0.290503	0.247191	0.207865	0.202247	0.011173	0.24581	0.458101	0.748603	1	0.072626	0.307263	0.486034	0.765363	0.994413	0.005587	0.173184	0.502793	0.72067	0.98324	0.402235	0.256983	0.340782	0.106742	0.073034	0.005618	0.005587	0.184358	0.603352	0.899441	1	0.011173	0.201117	0.50838	0.726257	0.810056	0.050279	0.27933	0.363128	0.564246	0.888268	0.351955	0.438202	0.01676	0.173184	0.497207	0.687151	0.972067	0.340782
0.398496	0.263158	0.338346	0.234848	0.25	0.19697	0.015038	0.300752	0.601504	0.774436	0.992481	0.022556	0.18797	0.421053	0.684211	1	0.007519	0.218045	0.443609	0.654135	0.977444	0.398496	0.330827	0.270677	0.075758	0.060606	0	0.007519	0.180451	0.518797	0.669173	1	0.12782	0.225564	0.345865	0.466165	0.56391	0.06015	0.736842	0.804511	0.87218	0.984962	0.466165	0.318182	0.030075	0.225564	0.353383	0.548872	0.977444	0.285714
0.341463	0.333333	0.325203	0.195918	0.24898	0.228571	0.012195	0.231707	0.430894	0.788618	1	0.00813	0.207317	0.54065	0.715447	0.995935	0.004065	0.308943	0.52439	0.752033	0.97561	0.49187	0.256098	0.252033	0.081633	0.065306	0.008163	0.004065	0.227642	0.378049	0.678862	1	0.03252	0.178862	0.49187	0.666667	0.817073	0.01626	0.471545	0.731707	0.898374	0.987805	0.573171	0.310204	0.01626	0.304878	0.528455	0.703252	0.987805	0.341463
0.35	0.377273	0.272727	0.242792	0.197269	0.212443	0.00303	0.233333	0.424242	0.739394	0.99697	0.006061	0.254545	0.574242	0.806061	0.995455	0.001515	0.20303	0.457576	0.674242	1	0.472727	0.127273	0.4	0.047041	0.08346	0.007587	0.001515	0.29697	0.607576	0.842424	1	0.036364	0.128788	0.345455	0.654545	0.990909	0.010606	0.263636	0.436364	0.625758	0.989394	0.509091	0.358118	0.004545	0.215152	0.475758	0.681818	0.993939	0.390909
0.416	0.3072	0.2768	0.25641	0.221154	0.189103	0.0048	0.2	0.4304	0.6704	0.9984	0.0032	0.2768	0.6032	0.8192	0.9968	0.0016	0.3152	0.5264	0.7376	1	0.5104	0.1616	0.328	0.070513	0.048077	0	0.0016	0.1936	0.4048	0.7904	1	0.0912	0.2816	0.7872	0.8784	0.992	0.0144	0.3472	0.4976	0.5792	0.7088	0.4192	0.394231	0.0096	0.3424	0.5968	0.8096	0.9968	0.3648
0.323944	0.338028	0.338028	0.229682	0.240283	0.201413	0.007042	0.302817	0.517606	0.795775	1	0.010563	0.235915	0.478873	0.721831	0.992958	0.003521	0.221831	0.492958	0.732394	0.989437	0.366197	0.172535	0.461268	0.04947	0.106007	0	0.003521	0.211268	0.471831	0.711268	1	0.112676	0.271127	0.40493	0.609155	0.700704	0.014085	0.242958	0.507042	0.809859	0.978873	0.549296	0.402827	0.024648	0.232394	0.471831	0.672535	0.989437	0.369718
0.386364	0.375	0.238636	0.275862	0.137931	0.218391	0.045455	0.215909	0.511364	0.738636	0.943182	0.022727	0.147727	0.443182	0.715909	1	0.011364	0.261364	0.431818	0.681818	0.988636	0.568182	0.045455	0.386364	0.045977	0.068966	0	0.011364	0.136364	0.318182	0.556818	1	0.284091	0.284091	0.295455	0.306818	0.5	0.352273	0.431818	0.704545	0.795455	0.965909	0.363636	0.436782	0.181818	0.375	0.602273	0.772727	0.988636	0.420455
0.304029	0.364469	0.331502	0.231193	0.20367	0.234862	0.009158	0.20696	0.470696	0.741758	1	0.003663	0.254579	0.485348	0.747253	0.998168	0.001832	0.282051	0.512821	0.739927	0.992674	0.441392	0.161172	0.397436	0.06055	0.093578	0.005505	0.001832	0.217949	0.498168	0.771062	1	0.043956	0.382784	0.604396	0.778388	0.921245	0.010989	0.250916	0.456044	0.705128	0.974359	0.540293	0.344954	0.010989	0.296703	0.489011	0.739927	0.992674	0.391941
0.323988	0.303219	0.372793	0.201663	0.22869	0.22973	0.002077	0.234683	0.460021	0.738318	0.998962	0.005192	0.277259	0.519211	0.754933	1	0.001038	0.246106	0.480789	0.748702	0.994808	0.253375	0.006231	0.740395	0.004158	0.095634	0.002079	0.001038	0.285566	0.509865	0.721703	1	0.008307	0.008307	0.627207	0.628245	0.846314	0.003115	0.239875	0.494289	0.752856	0.996885	0.569055	0.380457	0.005192	0.258567	0.522326	0.760125	0.997923	0.327103
0.41573	0.404494	0.179775	0.340909	0.170455	0.113636	0.022472	0.179775	0.370787	0.696629	1	0.05618	0.337079	0.516854	0.752809	0.988764	0.011236	0.202247	0.561798	0.741573	0.966292	0.157303	0	0.842697	0	0.068182	0	0.011236	0.033708	0.719101	0.752809	1	0	0	0	0	0	0.044944	0.235955	0.449438	0.685393	0.966292	0.325843	0.409091	0.067416	0.382022	0.550562	0.741573	0.966292	0.370787
0.321918	0.424658	0.253425	0.282759	0.165517	0.255172	0.020548	0.191781	0.506849	0.753425	1	0.013699	0.267123	0.493151	0.746575	0.965753	0.006849	0.253425	0.417808	0.657534	0.945205	0.527397	0.287671	0.184932	0.096552	0.027586	0	0.006849	0.130137	0.452055	0.746575	1	0.150685	0.253425	0.349315	0.684932	0.883562	0.527397	0.561644	0.609589	0.767123	0.815068	0.445205	0.344828	0.034247	0.328767	0.520548	0.719178	0.945205	0.431507
0.37218	0.342105	0.285714	0.279245	0.2	0.166038	0.007519	0.259398	0.578947	0.808271	1	0.018797	0.236842	0.466165	0.770677	0.992481	0.003759	0.203008	0.443609	0.62406	0.921053	0.296992	0.097744	0.605263	0.033962	0.09434	0.003774	0.003759	0.146617	0.575188	0.857143	1	0.112782	0.669173	0.710526	0.733083	0.766917	0.018797	0.225564	0.43985	0.620301	0.928571	0.43985	0.316981	0.011278	0.191729	0.413534	0.590226	0.921053	0.345865
0.345932	0.363717	0.290351	0.242883	0.205961	0.207295	0.003112	0.266785	0.536683	0.738995	1	0.000889	0.241885	0.470431	0.752334	0.998666	0.000445	0.228991	0.489551	0.767452	0.998221	0.501112	0.102268	0.396621	0.047153	0.08452	0.003559	0.000445	0.30458	0.53446	0.746109	1	0.001779	0.251667	0.435305	0.603824	0.986661	0.008004	0.185416	0.468208	0.781236	0.996443	0.501112	0.395018	0.001334	0.242775	0.494442	0.767452	0.998221	0.392174
0.361963	0.343558	0.294479	0.185185	0.185185	0.265432	0.018405	0.190184	0.429448	0.668712	0.98773	0.01227	0.263804	0.582822	0.785276	1	0.006135	0.257669	0.546012	0.766871	0.981595	0.361963	0.104294	0.533742	0.037037	0.08642	0	0.006135	0.08589	0.263804	0.674847	1	0.527607	0.546012	0.705521	0.822086	0.852761	0.122699	0.337423	0.478528	0.760736	0.98773	0.460123	0.358025	0.03681	0.361963	0.588957	0.754601	0.97546	0.349693
0.35865	0.329114	0.312236	0.266949	0.241525	0.207627	0.012658	0.270042	0.552743	0.759494	0.995781	0.021097	0.265823	0.506329	0.78481	0.983122	0.004219	0.202532	0.400844	0.654008	1	0.303797	0.118143	0.578059	0.042373	0.101695	0	0.004219	0.130802	0.345992	0.734177	1	0.109705	0.767932	0.814346	0.852321	0.881857	0.029536	0.270042	0.485232	0.632911	0.970464	0.510549	0.355932	0.016878	0.227848	0.43038	0.675105	0.974684	0.333333
0.321168	0.364964	0.313869	0.241463	0.202439	0.253659	0.014599	0.238443	0.474453	0.749392	0.997567	0.004866	0.226277	0.513382	0.751825	1	0.002433	0.274939	0.493917	0.729927	0.995134	0.442822	0.36983	0.187348	0.097561	0.058537	0.019512	0.002433	0.265207	0.527981	0.778589	1	0.075426	0.3382	0.554745	0.742092	0.985401	0.004866	0.167883	0.304136	0.625304	0.849148	0.462287	0.380488	0.009732	0.277372	0.515815	0.759124	0.995134	0.403893
0.323529	0.433824	0.242647	0.276753	0.151292	0.214022	0.011029	0.183824	0.463235	0.720588	0.996324	0.007353	0.216912	0.518382	0.779412	1	0.003676	0.330882	0.503676	0.713235	0.974265	0.363971	0.099265	0.536765	0.02952	0.103321	0	0.003676	0.102941	0.279412	0.709559	1	0.507353	0.801471	0.841912	0.875	0.900735	0.051471	0.327206	0.496324	0.661765	0.963235	0.452206	0.309963	0.018382	0.3125	0.481618	0.669118	0.966912	0.470588
0.337449	0.358025	0.304527	0.285124	0.210744	0.202479	0.012346	0.201646	0.530864	0.773663	0.987654	0.00823	0.230453	0.481481	0.707819	0.995885	0.004115	0.288066	0.465021	0.736626	1	0.534979	0.209877	0.255144	0.057851	0.066116	0.016529	0.004115	0.152263	0.320988	0.621399	1	0.08642	0.36214	0.502058	0.740741	0.995885	0.242798	0.427984	0.658436	0.835391	0.950617	0.469136	0.31405	0.061728	0.308642	0.534979	0.728395	0.99177	0.374486
0.336	0.5136	0.1504	0.264423	0.129808	0.11859	0.0064	0.2992	0.4912	0.6992	0.9984	0.0032	0.184	0.5392	0.8	1	0.0016	0.2912	0.4624	0.6224	0.9712	0.7136	0.056	0.2304	0.030449	0.033654	0.004808	0.0016	0.2	0.496	0.7536	1	0.1488	0.4016	0.4304	0.5024	0.992	0.128	0.3376	0.5232	0.9008	0.9808	0.4544	0.384615	0.0048	0.3296	0.5632	0.8176	0.992	0.5232
0.3025	0.36125	0.33625	0.215269	0.225282	0.257822	0.0075	0.25375	0.5275	0.75875	0.99875	0.005	0.26875	0.505	0.73625	0.99625	0.00125	0.21375	0.465	0.7475	1	0.47125	0.23125	0.2975	0.100125	0.057572	0.002503	0.00125	0.23375	0.485	0.7425	1	0.03875	0.195	0.405	0.75	0.9625	0.00625	0.3175	0.57375	0.70375	0.99375	0.56875	0.392991	0.00375	0.2625	0.47125	0.74	0.995	0.41875
0.297101	0.427536	0.275362	0.255474	0.160584	0.211679	0.014493	0.224638	0.485507	0.811594	1	0.028986	0.304348	0.521739	0.753623	0.963768	0.007246	0.137681	0.456522	0.666667	0.985507	0.681159	0.188406	0.130435	0.10219	0.043796	0.014599	0.007246	0.268116	0.442029	0.746377	1	0.449275	0.550725	0.688406	0.818841	0.985507	0.065217	0.086957	0.130435	0.15942	0.673913	0.405797	0.321168	0.021739	0.137681	0.550725	0.702899	0.985507	0.434783
0.394209	0.242762	0.363029	0.165179	0.319196	0.133929	0.01559	0.233853	0.523385	0.752784	1	0.011136	0.249443	0.438753	0.76392	0.982183	0.002227	0.23608	0.483296	0.732739	0.997773	0.405345	0.2049	0.389755	0.075893	0.080357	0.004464	0.002227	0.300668	0.530067	0.792873	1	0.004454	0.262806	0.496659	0.777283	0.971047	0.013363	0.198218	0.432071	0.706013	0.995546	0.554566	0.410714	0.004454	0.273942	0.481069	0.717149	0.997773	0.253898
0.397177	0.358871	0.243952	0.266667	0.185859	0.181818	0.006048	0.185484	0.417339	0.72379	0.997984	0.004032	0.252016	0.495968	0.756048	0.991935	0.002016	0.403226	0.574597	0.774194	1	0.612903	0.165323	0.221774	0.068687	0.068687	0	0.002016	0.191532	0.366935	0.635081	1	0.235887	0.471774	0.671371	0.877016	0.977823	0.020161	0.316532	0.627016	0.784274	0.987903	0.342742	0.290909	0.020161	0.40121	0.594758	0.802419	0.989919	0.417339
0.336449	0.351135	0.312417	0.217914	0.219251	0.223262	0.004005	0.312417	0.542056	0.815754	1	0.008011	0.202937	0.479306	0.70761	0.99733	0.001335	0.222964	0.46996	0.699599	0.998665	0.403204	0.261682	0.335113	0.076203	0.057487	0.009358	0.001335	0.221629	0.516689	0.781041	1	0.006676	0.158879	0.508678	0.783712	0.923899	0.029372	0.296395	0.405874	0.716956	0.99733	0.574099	0.36631	0.012016	0.208278	0.479306	0.676903	0.998665	0.376502
0.39599	0.397243	0.206767	0.331242	0.159348	0.16813	0.005013	0.256892	0.52381	0.799499	1	0.002506	0.276942	0.467419	0.734336	0.996241	0.001253	0.179198	0.484962	0.685464	0.997494	0.714286	0.070175	0.215539	0.035132	0.067754	0	0.001253	0.239348	0.457393	0.695489	1	0.070175	0.358396	0.754386	0.883459	0.938596	0.005013	0.186717	0.552632	0.834586	0.997494	0.327068	0.351317	0.003759	0.229323	0.541353	0.775689	0.997494	0.442356
0.341667	0.333333	0.325	0.193277	0.193277	0.285714	0.016667	0.216667	0.5	0.641667	0.991667	0.033333	0.208333	0.433333	0.8	1	0.008333	0.275	0.533333	0.725	0.966667	0.416667	0.208333	0.375	0.092437	0.07563	0.008403	0.008333	0.208333	0.458333	0.791667	1	0.041667	0.225	0.308333	0.416667	0.741667	0.133333	0.483333	0.575	0.783333	0.908333	0.441667	0.352941	0.05	0.316667	0.516667	0.708333	0.966667	0.333333
0.316113	0.364084	0.319803	0.237685	0.23399	0.225369	0.00246	0.259533	0.531365	0.773678	1	0.00492	0.238622	0.463715	0.712177	0.99754	0.00123	0.255843	0.512915	0.769988	0.99877	0.464945	0.239852	0.295203	0.096059	0.059113	0.002463	0.00123	0.230012	0.478475	0.738007	1	0.04182	0.198032	0.415744	0.801968	0.99877	0.00615	0.319803	0.570726	0.706027	0.99262	0.564576	0.399015	0.00369	0.258303	0.468635	0.742927	0.99877	0.383764
0.37037	0.417989	0.21164	0.324468	0.117021	0.164894	0.068783	0.322751	0.62963	0.825397	1	0.010582	0.26455	0.52381	0.761905	0.984127	0.005291	0.142857	0.301587	0.460317	0.925926	0.677249	0.174603	0.148148	0.06383	0.06383	0.010638	0.005291	0.301587	0.582011	0.793651	1	0.153439	0.232804	0.386243	0.460317	0.613757	0.084656	0.132275	0.42328	0.724868	0.878307	0.365079	0.276596	0.026455	0.201058	0.380952	0.470899	0.925926	0.455026
0.36014	0.265734	0.374126	0.196491	0.259649	0.192982	0.006993	0.251748	0.48951	0.77972	0.993007	0.041958	0.248252	0.51049	0.716783	1	0.003497	0.237762	0.486014	0.751748	0.996503	0.405594	0.171329	0.423077	0.049123	0.077193	0	0.003497	0.178322	0.440559	0.695804	1	0.185315	0.34965	0.43007	0.632867	0.723776	0.034965	0.244755	0.527972	0.828671	0.986014	0.555944	0.414035	0.024476	0.244755	0.468531	0.674825	0.982517	0.265734
0.371901	0.285124	0.342975	0.215768	0.26556	0.186722	0.016529	0.231405	0.557851	0.752066	0.995868	0.008264	0.260331	0.541322	0.81405	1	0.004132	0.239669	0.421488	0.681818	0.884298	0.483471	0.128099	0.38843	0.06639	0.06639	0.024896	0.004132	0.214876	0.590909	0.863636	1	0.020661	0.095041	0.173554	0.681818	0.88843	0.057851	0.31405	0.442149	0.607438	0.809917	0.545455	0.348548	0.024793	0.272727	0.446281	0.673554	0.896694	0.285124
0.324034	0.392704	0.283262	0.253763	0.184946	0.225806	0.006438	0.238197	0.495708	0.729614	0.997854	0.004292	0.244635	0.497854	0.77897	1	0.002146	0.257511	0.487124	0.753219	0.991416	0.390558	0.186695	0.422747	0.062366	0.066667	0.002151	0.002146	0.291845	0.5	0.742489	1	0.103004	0.246781	0.487124	0.761803	0.950644	0.01073	0.199571	0.433476	0.678112	0.98927	0.551502	0.395699	0.01073	0.26824	0.487124	0.714592	0.991416	0.454936
0.316731	0.372925	0.310345	0.21867	0.212276	0.236573	0.006386	0.293742	0.49553	0.766284	1	0.002554	0.229885	0.517241	0.756066	0.998723	0.001277	0.234994	0.480204	0.727969	0.989783	0.421456	0.254151	0.324393	0.076726	0.058824	0.005115	0.001277	0.190294	0.512133	0.720307	1	0.010217	0.199234	0.598978	0.828863	0.992337	0.034483	0.323116	0.430396	0.733078	0.971903	0.590038	0.355499	0.003831	0.218391	0.485313	0.688378	0.983397	0.403576
0.33564	0.422145	0.242215	0.260417	0.163194	0.215278	0.010381	0.269896	0.463668	0.747405	0.979239	0.00692	0.221453	0.543253	0.820069	1	0.00346	0.242215	0.487889	0.67474	0.989619	0.519031	0.190311	0.290657	0.083333	0.055556	0	0.00346	0.214533	0.543253	0.844291	1	0.013841	0.16263	0.346021	0.643599	0.99308	0.107266	0.304498	0.508651	0.712803	0.816609	0.449827	0.354167	0.017301	0.259516	0.574394	0.747405	0.989619	0.453287
0.315985	0.3829	0.301115	0.25	0.186567	0.242537	0.007435	0.286245	0.494424	0.762082	1	0.022305	0.260223	0.572491	0.784387	0.996283	0.003717	0.200743	0.408922	0.609665	0.988848	0.773234	0.152416	0.074349	0.070896	0.033582	0.011194	0.003717	0.330855	0.550186	0.747212	1	0.011152	0.223048	0.282528	0.821561	0.918216	0.052045	0.066914	0.156134	0.472119	0.988848	0.364312	0.425373	0.01487	0.249071	0.483271	0.825279	0.988848	0.412639
0.388889	0.314815	0.296296	0.245283	0.226415	0.150943	0.018519	0.259259	0.425926	0.555556	0.944444	0.037037	0.203704	0.537037	0.814815	1	0.055556	0.148148	0.574074	0.666667	0.981481	0.277778	0.092593	0.62963	0.037736	0.037736	0	0.018519	0.148148	0.222222	0.296296	1	0.055556	0.055556	0.074074	0.092593	0.12963	0.351852	0.481481	0.648148	0.796296	0.962963	0.481481	0.45283	0.055556	0.166667	0.592593	0.759259	0.925926	0.296296
0.375172	0.308966	0.315862	0.208564	0.243094	0.214088	0.004138	0.224828	0.526897	0.783448	1	0.002759	0.296552	0.503448	0.73931	0.995862	0.001379	0.216552	0.467586	0.704828	0.997241	0.475862	0.350345	0.173793	0.13674	0.029006	0.001381	0.001379	0.21931	0.422069	0.692414	1	0.004138	0.325517	0.517241	0.675862	0.995862	0.033103	0.147586	0.882759	0.928276	0.987586	0.49931	0.375691	0.008276	0.277241	0.503448	0.724138	0.997241	0.33931
0.334577	0.349502	0.31592	0.225405	0.224159	0.227895	0.007463	0.253731	0.493781	0.727612	1	0.004975	0.254975	0.504975	0.748756	0.987562	0.001244	0.235075	0.492537	0.762438	0.998756	0.466418	0.24005	0.293532	0.103362	0.053549	0.003736	0.001244	0.210199	0.46393	0.75	1	0.038557	0.207711	0.424129	0.794776	0.998756	0.006219	0.323383	0.54602	0.705224	0.992537	0.56592	0.400996	0.003731	0.263682	0.477612	0.737562	0.998756	0.369403
0.454545	0.363636	0.181818	0.367816	0.172414	0.114943	0.034091	0.227273	0.454545	0.795455	1	0.022727	0.272727	0.534091	0.704545	0.988636	0.011364	0.318182	0.443182	0.75	0.943182	0.170455	0.011364	0.818182	0.022989	0.068966	0	0.011364	0.034091	0.488636	0.772727	1	0.761364	0.761364	0.761364	0.761364	0.761364	0.056818	0.25	0.454545	0.693182	0.977273	0.340909	0.45977	0.079545	0.352273	0.579545	0.75	0.943182	0.386364
0.236667	0.413333	0.35	0.200669	0.200669	0.277592	0.02	0.22	0.396667	0.76	0.996667	0.006667	0.243333	0.566667	0.763333	1	0.003333	0.256667	0.496667	0.686667	0.993333	0.613333	0.146667	0.24	0.053512	0.060201	0	0.003333	0.336667	0.646667	0.813333	1	0.023333	0.083333	0.133333	0.356667	0.993333	0.203333	0.31	0.496667	0.556667	0.93	0.51	0.421405	0.013333	0.21	0.436667	0.663333	0.993333	0.42
0.356522	0.352174	0.291304	0.231441	0.218341	0.20524	0.008696	0.195652	0.53913	0.730435	1	0.03913	0.273913	0.426087	0.743478	0.986957	0.004348	0.282609	0.517391	0.76087	0.991304	0.434783	0.282609	0.282609	0.087336	0.061135	0.008734	0.004348	0.234783	0.430435	0.678261	1	0.013043	0.213043	0.547826	0.76087	0.978261	0.091304	0.286957	0.508696	0.721739	0.873913	0.6	0.384279	0.021739	0.282609	0.486957	0.708696	0.978261	0.334783
0.360902	0.323308	0.315789	0.272727	0.227273	0.174242	0.037594	0.285714	0.466165	0.706767	0.984962	0.015038	0.180451	0.526316	0.774436	1	0.007519	0.240602	0.481203	0.766917	0.992481	0.368421	0.345865	0.285714	0.143939	0.05303	0.007576	0.007519	0.338346	0.556391	0.721805	1	0.180451	0.383459	0.586466	0.81203	0.992481	0.030075	0.090226	0.24812	0.315789	0.917293	0.458647	0.439394	0.037594	0.240602	0.503759	0.789474	0.992481	0.338346
0.275641	0.474359	0.25	0.283871	0.141935	0.2	0.025641	0.166667	0.50641	0.75641	0.99359	0.019231	0.282051	0.532051	0.807692	1	0.00641	0.198718	0.435897	0.602564	0.846154	0.583333	0.108974	0.307692	0.032258	0.045161	0.006452	0.00641	0.230769	0.378205	0.852564	1	0.185897	0.205128	0.423077	0.448718	0.685897	0.076923	0.480769	0.557692	0.75641	0.833333	0.423077	0.322581	0.051282	0.365385	0.5	0.660256	0.903846	0.467949
0.331126	0.377483	0.291391	0.229236	0.229236	0.196013	0.013245	0.235099	0.47351	0.738411	0.996689	0.006623	0.261589	0.536424	0.811258	0.986755	0.003311	0.241722	0.460265	0.675497	1	0.453642	0.162252	0.384106	0.046512	0.07309	0	0.003311	0.258278	0.509934	0.837748	1	0.122517	0.274834	0.354305	0.562914	0.649007	0.033113	0.241722	0.486755	0.761589	0.903974	0.559603	0.41196	0.019868	0.231788	0.470199	0.705298	0.986755	0.427152
0.328125	0.375	0.296875	0.215686	0.168627	0.215686	0.070312	0.300781	0.519531	0.792969	0.984375	0.007812	0.195312	0.488281	0.71875	0.996094	0.003906	0.191406	0.492188	0.6875	1	0.554688	0.246094	0.199219	0.070588	0.054902	0.007843	0.003906	0.195312	0.476562	0.804688	1	0.015625	0.527344	0.632812	0.757812	0.878906	0.019531	0.199219	0.253906	0.410156	0.972656	0.34375	0.4	0.023438	0.238281	0.5	0.691406	0.972656	0.375
0.25784	0.407666	0.334495	0.164336	0.188811	0.269231	0.006969	0.170732	0.508711	0.773519	1	0.010453	0.229965	0.463415	0.707317	0.993031	0.003484	0.278746	0.505226	0.763066	0.982578	0.425087	0.243902	0.33101	0.097902	0.076923	0	0.003484	0.156794	0.341463	0.567944	1	0.020906	0.191638	0.313589	0.466899	0.95122	0.348432	0.672474	0.783972	0.87108	0.982578	0.54007	0.398601	0.017422	0.28223	0.494774	0.752613	0.982578	0.390244
0.279236	0.389021	0.331742	0.203349	0.19378	0.222488	0.026253	0.324582	0.515513	0.799523	0.99284	0.004773	0.164678	0.463007	0.711217	0.995227	0.002387	0.272076	0.522673	0.74463	1	0.48926	0.147971	0.362768	0.055024	0.083732	0.011962	0.002387	0.236277	0.527446	0.756563	1	0.023866	0.097852	0.26253	0.460621	0.961814	0.038186	0.317422	0.548926	0.794749	0.995227	0.587112	0.37799	0.01432	0.26969	0.477327	0.725537	0.995227	0.396181
0.441441	0.252252	0.306306	0.263636	0.290909	0.172727	0.018018	0.288288	0.531532	0.756757	1	0.045045	0.189189	0.378378	0.702703	0.927928	0.009009	0.234234	0.495495	0.72973	0.972973	0.432432	0.297297	0.27027	0.118182	0.063636	0.009091	0.009009	0.27027	0.630631	0.774775	1	0.036036	0.333333	0.603604	0.801802	0.963964	0.081081	0.135135	0.261261	0.45045	0.927928	0.396396	0.418182	0.036036	0.189189	0.45045	0.783784	0.972973	0.288288
0.389474	0.315789	0.294737	0.253968	0.232804	0.190476	0.015789	0.231579	0.5	0.715789	0.994737	0.010526	0.252632	0.468421	0.752632	0.973684	0.005263	0.247368	0.531579	0.736842	1	0.452632	0.163158	0.384211	0.074074	0.084656	0	0.005263	0.321053	0.484211	0.689474	1	0.015789	0.305263	0.715789	0.8	0.994737	0.047368	0.173684	0.415789	0.668421	0.963158	0.447368	0.455026	0.021053	0.242105	0.494737	0.678947	0.989474	0.415789
0.338235	0.448529	0.213235	0.237037	0.17037	0.118519	0.036765	0.25	0.470588	0.676471	1	0.044118	0.323529	0.654412	0.875	0.992647	0.007353	0.095588	0.294118	0.514706	0.691176	0.323529	0.161765	0.514706	0.059259	0.088889	0	0.007353	0.25	0.330882	0.463235	1	0.014706	0.205882	0.411765	0.477941	0.522059	0.051471	0.544118	0.676471	0.852941	0.992647	0.316176	0.281481	0.022059	0.176471	0.411765	0.588235	0.963235	0.477941
0.415011	0.337748	0.247241	0.245575	0.181416	0.192478	0.006623	0.245033	0.509934	0.737307	1	0.004415	0.216336	0.467991	0.730684	0.971302	0.002208	0.291391	0.503311	0.788079	0.969095	0.529801	0.200883	0.269316	0.070796	0.061947	0	0.002208	0.214128	0.505519	0.706402	1	0.039735	0.233996	0.419426	0.757174	0.905077	0.013245	0.293598	0.549669	0.796909	0.958057	0.430464	0.327434	0.037528	0.258278	0.459161	0.750552	0.969095	0.355408
0.458993	0.316547	0.22446	0.244957	0.197406	0.161383	0.01295	0.351079	0.509353	0.776978	1	0.002878	0.230216	0.648921	0.808633	0.995683	0.001439	0.156835	0.332374	0.6	0.997122	0.447482	0.094964	0.457554	0.036023	0.056196	0.004323	0.001439	0.230216	0.72518	0.85036	1	0.004317	0.048921	0.146763	0.305036	0.789928	0.020144	0.374101	0.489209	0.602878	0.968345	0.261871	0.268012	0.005755	0.128058	0.277698	0.666187	0.905036	0.339568
0.332606	0.367503	0.299891	0.232533	0.20524	0.221616	0.004362	0.258451	0.507088	0.732824	1	0.002181	0.232279	0.529989	0.770992	0.997819	0.001091	0.245365	0.466739	0.726281	0.998909	0.417666	0.185387	0.396947	0.092795	0.076419	0.008734	0.001091	0.266085	0.544166	0.804798	0.996728	0.029444	0.220284	0.693566	0.865867	1	0.005453	0.25627	0.473282	0.603053	0.961832	0.502726	0.388646	0.005453	0.25627	0.454744	0.733915	0.996728	0.410033
0.357143	0.330357	0.3125	0.2287	0.215247	0.201794	0.026786	0.245536	0.477679	0.732143	1	0.022321	0.263393	0.446429	0.75	0.986607	0.004464	0.183036	0.535714	0.736607	0.991071	0.522321	0.151786	0.325893	0.089686	0.06278	0	0.004464	0.272321	0.410714	0.696429	1	0.013393	0.066964	0.5625	0.71875	0.919643	0.09375	0.196429	0.540179	0.794643	0.986607	0.513393	0.376682	0.017857	0.330357	0.513393	0.78125	0.991071	0.357143
0.441727	0.305036	0.253237	0.255043	0.197406	0.184438	0.002878	0.283453	0.507914	0.720863	0.998561	0.008633	0.233094	0.494964	0.753957	1	0.001439	0.227338	0.446043	0.795683	0.994245	0.397122	0.047482	0.555396	0.023055	0.083573	0.002882	0.001439	0.146763	0.381295	0.765468	1	0.03741	0.08777	0.241727	0.264748	0.805755	0.010072	0.382734	0.568345	0.72518	0.995683	0.353957	0.377522	0.015827	0.221583	0.42446	0.743885	0.992806	0.320863
0.391153	0.355064	0.253783	0.235431	0.184149	0.194639	0.005821	0.314319	0.610012	0.798603	0.997672	0.002328	0.237485	0.477299	0.735739	1	0.001164	0.215367	0.400466	0.601863	0.996508	0.473807	0.124563	0.40163	0.050117	0.08042	0.003497	0.001164	0.231665	0.542491	0.759022	1	0.055879	0.243306	0.402794	0.599534	0.976717	0.036088	0.260768	0.522701	0.738068	0.996508	0.423749	0.344988	0.003492	0.215367	0.392317	0.573923	0.996508	0.391153
0.328294	0.315335	0.356371	0.19697	0.225108	0.244589	0.008639	0.25486	0.511879	0.764579	1	0.00432	0.235421	0.526998	0.766739	0.99568	0.00216	0.237581	0.483801	0.693305	0.99784	0.401728	0.146868	0.451404	0.051948	0.090909	0.004329	0.00216	0.263499	0.526998	0.775378	1	0.095032	0.269978	0.444924	0.62851	0.734341	0.012959	0.209503	0.531317	0.790497	0.993521	0.552916	0.363636	0.012959	0.226782	0.447084	0.684665	0.974082	0.343413
0.341394	0.364154	0.294452	0.225071	0.225071	0.202279	0.002845	0.273115	0.529161	0.773826	0.998578	0.004267	0.213371	0.416785	0.661451	0.997155	0.001422	0.295875	0.587482	0.776671	1	0.473684	0.027027	0.499289	0.011396	0.105413	0.002849	0.001422	0.220484	0.357041	0.485064	1	0.00569	0.009957	0.153627	0.290185	0.524893	0.029872	0.517781	0.678521	0.83926	0.99431	0.573257	0.430199	0.00569	0.294452	0.519203	0.739687	0.99431	0.366999
0.39483	0.373678	0.231492	0.317647	0.172941	0.174118	0.0047	0.19389	0.458284	0.728555	1	0.00235	0.243243	0.473561	0.753231	0.998825	0.001175	0.393655	0.567568	0.766157	0.99765	0.571093	0.108108	0.320799	0.04	0.068235	0.002353	0.001175	0.182139	0.383079	0.745006	1	0.130435	0.478261	0.573443	0.714454	0.915394	0.047004	0.368978	0.584019	0.760282	0.996475	0.427732	0.327059	0.005875	0.400705	0.581669	0.759107	0.99765	0.407756
0.384615	0.306122	0.309262	0.218553	0.231132	0.187107	0.00314	0.288854	0.577708	0.839874	0.99843	0.00471	0.233909	0.480377	0.722135	0.993721	0.00157	0.21821	0.437991	0.660911	1	0.408163	0.128728	0.463108	0.048742	0.095912	0.004717	0.00157	0.22135	0.491366	0.769231	1	0.078493	0.246468	0.401884	0.572998	0.990581	0.018838	0.265306	0.55573	0.828885	0.971743	0.477237	0.352201	0.007849	0.213501	0.430141	0.624804	0.992151	0.33124
0.29816	0.361963	0.339877	0.224816	0.200246	0.246929	0.004908	0.23681	0.438037	0.734969	0.995092	0.002454	0.209816	0.507975	0.737423	0.998773	0.001227	0.290798	0.542331	0.759509	1	0.517791	0.18773	0.294479	0.078624	0.058968	0.002457	0.001227	0.185276	0.434356	0.67362	1	0.006135	0.207362	0.409816	0.765644	0.997546	0.092025	0.392638	0.62454	0.83681	0.992638	0.507975	0.380835	0.003681	0.289571	0.585276	0.792638	0.997546	0.385276
0.362637	0.395604	0.241758	0.231087	0.165062	0.185695	0.012363	0.245879	0.53022	0.798077	0.995879	0.002747	0.258242	0.483516	0.744505	1	0.001374	0.229396	0.458791	0.718407	0.990385	0.532967	0.093407	0.373626	0.031637	0.089409	0.004127	0.001374	0.201923	0.467033	0.712912	1	0.016484	0.228022	0.302198	0.417582	0.968407	0.050824	0.373626	0.618132	0.842033	0.991758	0.394231	0.34663	0.013736	0.247253	0.417582	0.723901	0.987637	0.425824
0.404494	0.224719	0.370787	0.141243	0.293785	0.20904	0.011236	0.258427	0.494382	0.780899	1	0.02809	0.168539	0.398876	0.668539	0.94382	0.005618	0.252809	0.505618	0.730337	0.994382	0.207865	0.134831	0.657303	0.050847	0.096045	0.00565	0.005618	0.280899	0.477528	0.758427	1	0.606742	0.634831	0.803371	0.865169	0.910112	0.022472	0.196629	0.41573	0.674157	0.988764	0.466292	0.474576	0.044944	0.269663	0.505618	0.730337	0.994382	0.275281
0.305737	0.427741	0.266521	0.25218	0.176599	0.228924	0.001452	0.272331	0.514887	0.758896	0.997821	0.003631	0.24183	0.485113	0.745824	0.999274	0.000726	0.217865	0.496732	0.743646	1	0.530864	0.384168	0.084967	0.15625	0.015262	0.000727	0.000726	0.256354	0.490922	0.726943	1	0.002905	0.297749	0.557008	0.813362	0.999274	0.007988	0.029049	0.15541	0.487291	0.805374	0.631082	0.366279	0.002905	0.248366	0.517066	0.761801	0.998548	0.447349
0.272975	0.363513	0.363513	0.178474	0.183243	0.27248	0.001361	0.196052	0.413887	0.686181	1	0.002042	0.257318	0.52757	0.767869	0.999319	0.000681	0.279101	0.503744	0.776038	0.997958	0.389381	0.094622	0.515997	0.033379	0.078338	0.006131	0.000681	0.20354	0.505786	0.689585	1	0.059224	0.154527	0.479238	0.636487	0.961879	0.011572	0.326072	0.494894	0.82369	0.997958	0.648741	0.26158	0.003404	0.275017	0.493533	0.785568	0.996596	0.377127
0.293103	0.37931	0.327586	0.175439	0.122807	0.315789	0.068966	0.62069	0.793103	0.87931	1	0.034483	0.224138	0.362069	0.534483	0.965517	0.017241	0.155172	0.431034	0.551724	0.896552	0.189655	0	0.810345	0	0.070175	0	0.017241	0.034483	0.086207	0.258621	1	0	0	0	0	0	0.103448	0.327586	0.534483	0.741379	0.948276	0.637931	0.350877	0.051724	0.258621	0.413793	0.568966	0.896552	0.310345
0.301695	0.389831	0.308475	0.193878	0.190476	0.234694	0.033898	0.291525	0.538983	0.830508	1	0.00678	0.210169	0.427119	0.684746	0.986441	0.00339	0.261017	0.532203	0.759322	0.99661	0.471186	0.210169	0.318644	0.078231	0.064626	0.003401	0.00339	0.122034	0.328814	0.681356	1	0.027119	0.311864	0.559322	0.79322	0.966102	0.145763	0.423729	0.569492	0.718644	0.918644	0.566102	0.387755	0.020339	0.298305	0.522034	0.728814	0.966102	0.376271
0.366154	0.332308	0.301538	0.211094	0.20339	0.208012	0.006154	0.287692	0.566154	0.8	1	0.003077	0.243077	0.435385	0.666154	0.996923	0.001538	0.238462	0.518462	0.718462	0.993846	0.490769	0.143077	0.366154	0.05547	0.067797	0.003082	0.001538	0.209231	0.378462	0.609231	1	0.153846	0.301538	0.575385	0.718462	0.996923	0.010769	0.384615	0.649231	0.789231	0.976923	0.455385	0.412943	0.013846	0.258462	0.503077	0.681538	0.993846	0.367692
0.231818	0.522727	0.245455	0.214612	0.086758	0.278539	0.009091	0.218182	0.6	0.781818	0.940909	0.031818	0.236364	0.477273	0.740909	0.995455	0.004545	0.240909	0.409091	0.709091	1	0.822727	0.090909	0.086364	0.050228	0.031963	0.022831	0.004545	0.204545	0.468182	0.740909	1	0.236364	0.254545	0.518182	0.727273	0.768182	0.304545	0.318182	0.704545	0.909091	0.931818	0.336364	0.347032	0.027273	0.254545	0.409091	0.704545	0.968182	0.5
0.3098	0.386723	0.303477	0.245781	0.206751	0.222574	0.002107	0.240253	0.508957	0.73235	1	0.005269	0.255005	0.496312	0.765016	0.997893	0.001054	0.243414	0.487882	0.744995	0.995785	0.593256	0.385669	0.021075	0.14135	0.00211	0.00211	0.001054	0.252898	0.511064	0.770285	1	0.003161	0.238145	0.45627	0.68177	0.955743	0.879874	0.978925	0.984194	0.989463	0.994731	0.41412	0.394515	0.003161	0.27608	0.542677	0.830348	0.996839	0.393045
0.368852	0.372131	0.259016	0.261084	0.198686	0.192118	0.008197	0.303279	0.504918	0.752459	0.993443	0.003279	0.152459	0.427869	0.731148	0.998361	0.001639	0.331148	0.562295	0.770492	1	0.283607	0	0.716393	0	0.108374	0	0.001639	0.145902	0.360656	0.685246	1	0	0	0	0	0	0.009836	0.311475	0.532787	0.762295	0.986885	0.540984	0.407225	0.009836	0.265574	0.521311	0.740984	0.995082	0.401639
0.350877	0.321053	0.32807	0.212654	0.224956	0.212654	0.003509	0.25614	0.501754	0.721053	1	0.010526	0.273684	0.57193	0.814035	0.996491	0.001754	0.219298	0.442105	0.712281	0.985965	0.414035	0.098246	0.487719	0.042179	0.077329	0	0.001754	0.249123	0.485965	0.815789	1	0.040351	0.122807	0.305263	0.457895	0.935088	0.005263	0.287719	0.540351	0.684211	0.963158	0.503509	0.358524	0.005263	0.229825	0.424561	0.740351	0.989474	0.312281
0.383333	0.254762	0.361905	0.188544	0.243437	0.207637	0.011905	0.314286	0.5	0.747619	1	0.004762	0.185714	0.502381	0.754762	0.997619	0.002381	0.240476	0.492857	0.735714	0.988095	0.392857	0.271429	0.335714	0.081146	0.062053	0.01432	0.002381	0.252381	0.480952	0.802381	1	0.17619	0.509524	0.607143	0.752381	0.985714	0.011905	0.154762	0.285714	0.67619	0.890476	0.554762	0.405728	0.009524	0.216667	0.5	0.785714	0.992857	0.3
0.278008	0.427386	0.294606	0.204167	0.195833	0.258333	0.012448	0.20332	0.419087	0.73029	0.983402	0.049793	0.286307	0.53527	0.780083	1	0.004149	0.215768	0.448133	0.73444	0.995851	0.593361	0.381743	0.024896	0.125	0.008333	0.008333	0.004149	0.228216	0.497925	0.763485	1	0.074689	0.257261	0.427386	0.680498	0.954357	0.93361	0.93361	0.941909	0.946058	0.958506	0.414938	0.35	0.029046	0.26556	0.560166	0.767635	0.962656	0.439834
0.228873	0.450704	0.320423	0.204586	0.137566	0.301587	0.008803	0.211268	0.482394	0.735915	0.992958	0.003521	0.272887	0.503521	0.753521	1	0.001761	0.234155	0.501761	0.751761	0.998239	0.487676	0.334507	0.177817	0.10582	0.024691	0.003527	0.001761	0.27993	0.559859	0.776408	1	0.144366	0.397887	0.630282	0.860915	0.998239	0.010563	0.052817	0.119718	0.172535	0.612676	0.669014	0.324515	0.021127	0.272887	0.510563	0.769366	0.998239	0.443662
0.158798	0.399142	0.44206	0.133621	0.116379	0.366379	0.012876	0.266094	0.39485	0.648069	0.88412	0.017167	0.274678	0.549356	0.781116	0.987124	0.004292	0.193133	0.472103	0.738197	1	0.167382	0	0.832618	0	0.086207	0	0.004292	0.141631	0.27897	0.626609	1	0	0	0	0	0	0.012876	0.287554	0.497854	0.776824	0.995708	0.802575	0.215517	0.008584	0.240343	0.493562	0.746781	0.982833	0.386266
0.359155	0.340962	0.299883	0.236054	0.200235	0.204345	0.003521	0.248239	0.504108	0.766432	1	0.001174	0.221244	0.482981	0.724178	0.994131	0.000587	0.286972	0.519366	0.746479	0.999413	0.535798	0.139671	0.324531	0.062243	0.069289	0.004698	0.000587	0.195423	0.454812	0.746479	1	0.003521	0.318075	0.546948	0.780516	0.890845	0.005282	0.335094	0.579812	0.751174	0.998826	0.496479	0.368761	0.002347	0.281103	0.510563	0.725352	0.995892	0.36385
0.296984	0.348028	0.354988	0.186047	0.213953	0.248837	0.00464	0.2529	0.512761	0.758701	0.99536	0.006961	0.194896	0.522042	0.74478	1	0.00232	0.269142	0.477958	0.730858	0.979118	0.389791	0.097448	0.512761	0.04186	0.097674	0.013953	0.00232	0.171694	0.438515	0.714617	1	0.12529	0.392111	0.433875	0.640371	0.979118	0.009281	0.266821	0.522042	0.75174	0.944316	0.561485	0.35814	0.016241	0.2529	0.475638	0.719258	0.990719	0.37587
0.324201	0.447489	0.228311	0.292906	0.162471	0.19222	0.004566	0.239726	0.468037	0.694064	1	0.011416	0.237443	0.502283	0.728311	0.997717	0.002283	0.251142	0.618721	0.842466	0.986301	0.6621	0.155251	0.182648	0.073227	0.05492	0.004577	0.002283	0.280822	0.477169	0.694064	1	0.018265	0.219178	0.289954	0.538813	0.90411	0.059361	0.273973	0.762557	0.938356	0.990868	0.461187	0.324943	0.013699	0.239726	0.636986	0.847032	0.988584	0.46347
0.309859	0.295775	0.394366	0.157143	0.3	0.257143	0.070423	0.225352	0.492958	0.676056	0.887324	0.042254	0.197183	0.478873	0.746479	1	0.014085	0.239437	0.450704	0.704225	0.957746	0.56338	0.295775	0.140845	0.128571	0.042857	0.014286	0.014085	0.211268	0.450704	0.690141	1	0.084507	0.140845	0.56338	0.873239	0.957746	0.323944	0.338028	0.380282	0.408451	0.760563	0.464789	0.371429	0.084507	0.366197	0.56338	0.788732	0.971831	0.309859
0.230769	0.373626	0.395604	0.133333	0.155556	0.288889	0.032967	0.483516	0.626374	0.813187	0.967033	0.087912	0.274725	0.406593	0.659341	0.989011	0.010989	0.120879	0.417582	0.725275	1	0.549451	0.186813	0.263736	0.066667	0.044444	0	0.010989	0.373626	0.637363	0.857143	1	0.296703	0.384615	0.428571	0.681319	0.736264	0.032967	0.087912	0.153846	0.21978	0.582418	0.527473	0.333333	0.043956	0.164835	0.373626	0.67033	0.945055	0.340659
0.328798	0.380952	0.290249	0.251986	0.174801	0.209989	0.004535	0.281179	0.513605	0.736961	0.996599	0.002268	0.179138	0.422902	0.709751	1	0.001134	0.340136	0.573696	0.783447	0.998866	0.517007	0.121315	0.361678	0.052213	0.068104	0.00227	0.001134	0.163265	0.421769	0.734694	1	0.195011	0.325397	0.648526	0.811791	0.944444	0.00907	0.311791	0.498866	0.72449	0.993197	0.554422	0.345062	0.010204	0.302721	0.536281	0.783447	0.989796	0.370748
0.348315	0.355805	0.29588	0.225564	0.214286	0.240602	0.007491	0.235955	0.554307	0.756554	1	0.026217	0.23221	0.445693	0.730337	0.988764	0.003745	0.280899	0.47191	0.700375	0.996255	0.490637	0.217228	0.292135	0.082707	0.06015	0	0.003745	0.217228	0.52809	0.771536	1	0.011236	0.205993	0.363296	0.64794	0.910112	0.05618	0.299625	0.449438	0.674157	0.988764	0.621723	0.323308	0.014981	0.243446	0.423221	0.662921	0.992509	0.363296
0.327684	0.40678	0.265537	0.271698	0.162264	0.216981	0.003766	0.263653	0.52354	0.764595	0.990584	0.00565	0.244821	0.508475	0.73823	1	0.001883	0.237288	0.468927	0.708098	0.992467	0.532957	0.122411	0.344633	0.056604	0.056604	0.003774	0.001883	0.27307	0.483992	0.702448	1	0.210923	0.514124	0.630885	0.783427	0.920904	0.00565	0.141243	0.369115	0.762712	0.981168	0.506591	0.377358	0.00565	0.239171	0.478343	0.770245	0.998117	0.399247
0.29653	0.413249	0.290221	0.272152	0.164557	0.237342	0.006309	0.230284	0.495268	0.757098	0.990536	0.012618	0.264984	0.523659	0.73817	1	0.003155	0.223975	0.473186	0.747634	0.996845	0.293375	0.195584	0.511041	0.079114	0.085443	0.009494	0.003155	0.211356	0.388013	0.608833	1	0.022082	0.239748	0.580442	0.842271	0.899054	0.047319	0.302839	0.501577	0.735016	0.996845	0.649842	0.310127	0.022082	0.252366	0.488959	0.735016	0.996845	0.435331
0.305677	0.373362	0.320961	0.253829	0.210066	0.2407	0.004367	0.246725	0.467249	0.737991	0.997817	0.00655	0.244541	0.524017	0.751092	0.980349	0.002183	0.237991	0.478166	0.722707	1	0.377729	0.233624	0.388646	0.09628	0.078775	0	0.002183	0.224891	0.443231	0.744541	1	0.0131	0.194323	0.303493	0.659389	0.997817	0.039301	0.414847	0.569869	0.753275	0.932314	0.617904	0.350109	0.010917	0.259825	0.530568	0.770742	0.995633	0.373362
0.364706	0.376471	0.258824	0.238095	0.214286	0.202381	0.023529	0.141176	0.423529	0.717647	0.964706	0.047059	0.282353	0.552941	0.776471	1	0.011765	0.223529	0.411765	0.670588	0.952941	0.388235	0.047059	0.564706	0.02381	0.119048	0	0.011765	0.282353	0.682353	0.776471	1	0.058824	0.058824	0.070588	0.082353	0.094118	0.117647	0.270588	0.447059	0.611765	0.964706	0.4	0.452381	0.047059	0.294118	0.494118	0.670588	0.952941	0.423529
0.30602	0.455686	0.238294	0.240167	0.175732	0.210042	0.004181	0.288462	0.571906	0.798495	1	0.001672	0.235786	0.467391	0.685619	0.999164	0.000836	0.234114	0.502508	0.759197	0.998328	0.51087	0.194816	0.294314	0.094561	0.07113	0.009205	0.000836	0.30602	0.510033	0.709866	1	0.011706	0.374582	0.576923	0.803512	0.999164	0.002508	0.190635	0.319398	0.773411	0.927258	0.619565	0.366527	0.002508	0.247492	0.498328	0.740803	0.998328	0.452341
0.368999	0.303155	0.327846	0.225275	0.252747	0.193681	0.005487	0.271605	0.508916	0.740741	0.995885	0.002743	0.257888	0.515775	0.757202	1	0.001372	0.218107	0.462277	0.744856	0.998628	0.256516	0.061728	0.681756	0.021978	0.071429	0	0.001372	0.367627	0.662551	0.832647	1	0.66941	0.73251	0.757202	0.851852	0.997257	0.004115	0.211248	0.411523	0.636488	0.980796	0.473251	0.447802	0.004115	0.23594	0.492455	0.73251	0.997257	0.316872
0.271715	0.429844	0.298441	0.216518	0.178571	0.274554	0.004454	0.253898	0.525612	0.788419	1	0.008909	0.216036	0.478842	0.737194	0.988864	0.002227	0.247216	0.476615	0.721604	0.991091	0.416481	0.242762	0.340757	0.113839	0.078125	0.002232	0.002227	0.269488	0.530067	0.746102	1	0.017817	0.305122	0.536748	0.777283	0.944321	0.033408	0.184855	0.412027	0.712695	0.995546	0.641425	0.388393	0.008909	0.240535	0.501114	0.76392	0.991091	0.445434
0.32598	0.338235	0.335784	0.211302	0.240786	0.203931	0.017157	0.257353	0.487745	0.730392	0.987745	0.004902	0.203431	0.492647	0.759804	1	0.002451	0.262255	0.512255	0.747549	0.997549	0.392157	0.105392	0.502451	0.027027	0.110565	0.017199	0.002451	0.193627	0.470588	0.720588	1	0.178922	0.553922	0.585784	0.67402	0.919118	0.012255	0.264706	0.443627	0.757353	0.990196	0.497549	0.427518	0.007353	0.291667	0.536765	0.757353	0.992647	0.340686
0.352129	0.321059	0.326812	0.207373	0.246544	0.214286	0.003452	0.203682	0.445339	0.719217	0.997699	0.002301	0.278481	0.535098	0.765247	0.996548	0.001151	0.254315	0.493671	0.761795	1	0.528193	0.163406	0.3084	0.065668	0.074885	0.008065	0.001151	0.226697	0.532796	0.776755	1	0.043728	0.225547	0.7687	0.927503	0.998849	0.005754	0.250863	0.376295	0.567319	0.965478	0.516686	0.33871	0.006904	0.293441	0.510932	0.783659	0.998849	0.326812
0.255435	0.335145	0.40942	0.190563	0.170599	0.274047	0.016304	0.282609	0.461957	0.731884	1	0.003623	0.259058	0.492754	0.744565	0.985507	0.001812	0.242754	0.518116	0.748188	0.998188	0.382246	0.050725	0.567029	0.018149	0.083485	0.00726	0.001812	0.335145	0.606884	0.811594	1	0.202899	0.221014	0.786232	0.974638	0.996377	0.01087	0.166667	0.432971	0.650362	0.967391	0.695652	0.246824	0.007246	0.231884	0.496377	0.730072	0.994565	0.346014
0.340708	0.39823	0.261062	0.302222	0.208889	0.186667	0.013274	0.256637	0.486726	0.778761	1	0.00885	0.230088	0.477876	0.738938	0.969027	0.004425	0.216814	0.513274	0.681416	0.99115	0.561947	0.234513	0.20354	0.111111	0.084444	0.004444	0.004425	0.230088	0.433628	0.783186	1	0.017699	0.185841	0.39823	0.654867	0.809735	0.039823	0.513274	0.646018	0.871681	0.946903	0.5	0.337778	0.017699	0.221239	0.460177	0.676991	0.938053	0.424779
0.287792	0.395844	0.316364	0.219854	0.18659	0.256757	0.002078	0.289351	0.588052	0.808831	0.999481	0.001039	0.201039	0.442597	0.691429	1	0.000519	0.275844	0.518961	0.75013	0.997922	0.536623	0.22961	0.233766	0.086798	0.0421	0.001559	0.000519	0.214545	0.417143	0.629091	1	0.031688	0.251429	0.438442	0.583896	0.998442	0.005195	0.66961	0.759481	0.896623	0.994805	0.529351	0.390852	0.002078	0.221818	0.484156	0.74961	0.998442	0.420779
0.310513	0.448655	0.240831	0.252142	0.134639	0.220318	0.007335	0.229829	0.435208	0.777506	0.997555	0.002445	0.223716	0.502445	0.710269	0.998778	0.001222	0.328851	0.562347	0.751834	1	0.53912	0.090465	0.370416	0.031824	0.083231	0.004896	0.001222	0.198044	0.440098	0.784841	1	0.01467	0.261614	0.482885	0.657702	0.997555	0.050122	0.400978	0.562347	0.727384	0.968215	0.484108	0.359853	0.00489	0.314181	0.55379	0.739609	0.996333	0.466993
0.446154	0.230769	0.323077	0.171875	0.296875	0.1875	0.030769	0.307692	0.492308	0.646154	0.984615	0.123077	0.230769	0.523077	0.892308	1	0.015385	0.184615	0.415385	0.676923	0.969231	0.123077	0	0.876923	0	0.0625	0	0.015385	0.030769	0.276923	0.969231	1	0	0	0	0	0	0.061538	0.261538	0.507692	0.723077	0.953846	0.446154	0.40625	0.061538	0.2	0.4	0.723077	0.907692	0.323077
0.270506	0.376963	0.352531	0.215035	0.157343	0.236014	0.005236	0.212914	0.450262	0.736475	1	0.00349	0.267016	0.551483	0.832461	0.994764	0.001745	0.265271	0.495637	0.663176	0.99651	0.38918	0.041885	0.568935	0.024476	0.076923	0	0.001745	0.233857	0.542757	0.883072	1	0.21466	0.267016	0.376963	0.635253	0.968586	0.024433	0.282723	0.486911	0.682373	0.989529	0.565445	0.293706	0.017452	0.282723	0.511344	0.692845	0.99651	0.34555
0.339713	0.354067	0.30622	0.266187	0.206235	0.227818	0.021531	0.277512	0.557416	0.753589	1	0.004785	0.217703	0.411483	0.674641	0.990431	0.002392	0.251196	0.464115	0.796651	0.997608	0.366029	0.126794	0.507177	0.055156	0.11271	0.01199	0.002392	0.284689	0.57177	0.834928	1	0.007177	0.148325	0.739234	0.851675	0.995215	0.028708	0.251196	0.42823	0.655502	0.983254	0.516746	0.364508	0.004785	0.229665	0.406699	0.77512	0.997608	0.361244
0.362924	0.29765	0.339426	0.167539	0.267016	0.17801	0.018277	0.18799	0.4047	0.624021	0.997389	0.010444	0.318538	0.579634	0.853786	0.992167	0.002611	0.248042	0.545692	0.770235	1	0.250653	0.088773	0.660574	0.031414	0.062827	0.015707	0.002611	0.208877	0.472585	0.845953	1	0.007833	0.219321	0.287206	0.882507	0.908616	0.010444	0.326371	0.545692	0.723238	0.986945	0.48564	0.445026	0.007833	0.287206	0.563969	0.788512	0.986945	0.331593
0.271903	0.332326	0.39577	0.175758	0.2	0.275758	0.036254	0.296073	0.495468	0.746224	0.984894	0.006042	0.226586	0.516616	0.716012	1	0.003021	0.202417	0.486405	0.776435	0.993958	0.462236	0.141994	0.39577	0.060606	0.066667	0	0.003021	0.23565	0.598187	0.794562	1	0.196375	0.34139	0.531722	0.628399	0.930514	0.012085	0.135952	0.456193	0.749245	0.978852	0.670695	0.345455	0.012085	0.199396	0.483384	0.728097	0.993958	0.283988
0.286445	0.332481	0.381074	0.2	0.217949	0.246154	0.015345	0.237852	0.516624	0.780051	1	0.007673	0.296675	0.529412	0.726343	0.997442	0.002558	0.212276	0.455243	0.70844	0.994885	0.396419	0.127877	0.475703	0.048718	0.105128	0.002564	0.002558	0.263427	0.501279	0.731458	1	0.030691	0.163683	0.340153	0.598465	0.654731	0.007673	0.250639	0.531969	0.836317	0.994885	0.626598	0.358974	0.005115	0.263427	0.521739	0.695652	0.992327	0.322251
0.222642	0.362264	0.415094	0.17803	0.132576	0.314394	0.037736	0.264151	0.633962	0.837736	0.996226	0.007547	0.283019	0.554717	0.788679	0.992453	0.003774	0.192453	0.392453	0.615094	1	0.369811	0.022642	0.607547	0.015152	0.068182	0.007576	0.003774	0.381132	0.796226	0.886792	1	0.090566	0.090566	0.913208	0.916981	0.939623	0.011321	0.207547	0.407547	0.584906	0.758491	0.701887	0.136364	0.007547	0.215094	0.449057	0.622642	0.981132	0.343396
0.28629	0.370968	0.342742	0.189899	0.187879	0.282828	0.010081	0.231855	0.459677	0.719758	1	0.004032	0.243952	0.481855	0.693548	0.985887	0.002016	0.260081	0.566532	0.824597	0.997984	0.405242	0.165323	0.429435	0.054545	0.090909	0.006061	0.002016	0.227823	0.461694	0.653226	1	0.016129	0.163306	0.364919	0.479839	0.667339	0.030242	0.296371	0.705645	0.840726	0.991935	0.639113	0.327273	0.012097	0.268145	0.532258	0.790323	0.987903	0.383065
0.326733	0.376238	0.29703	0.26	0.16	0.27	0.029703	0.306931	0.643564	0.841584	0.980198	0.019802	0.247525	0.425743	0.693069	1	0.009901	0.178218	0.415842	0.574257	0.851485	0.455446	0.277228	0.267327	0.1	0.06	0	0.009901	0.277228	0.50495	0.673267	1	0.029703	0.089109	0.19802	0.544554	0.752475	0.287129	0.336634	0.831683	0.90099	0.970297	0.485149	0.46	0.039604	0.207921	0.49505	0.732673	0.930693	0.386139
0.319588	0.329897	0.350515	0.229167	0.25	0.25	0.030928	0.185567	0.43299	0.680412	0.989691	0.041237	0.309278	0.587629	0.783505	0.979381	0.010309	0.14433	0.42268	0.701031	1	0.329897	0.14433	0.525773	0.041667	0.083333	0	0.010309	0.164948	0.494845	0.639175	1	0.030928	0.051546	0.092784	0.57732	0.618557	0.195876	0.309278	0.670103	0.824742	0.958763	0.56701	0.416667	0.020619	0.28866	0.57732	0.824742	0.979381	0.371134
0.33574	0.400722	0.263538	0.246377	0.177536	0.202899	0.00722	0.231047	0.490975	0.736462	1	0.043321	0.259928	0.501805	0.743682	0.98556	0.00361	0.173285	0.469314	0.754513	0.99278	0.519856	0.270758	0.209386	0.097826	0.054348	0.01087	0.00361	0.274368	0.548736	0.740072	1	0.202166	0.314079	0.537906	0.794224	0.953069	0.01083	0.057762	0.241877	0.581227	0.98917	0.584838	0.362319	0.018051	0.256318	0.519856	0.750903	0.99639	0.379061
0.429732	0.329813	0.240455	0.272358	0.198374	0.14878	0.004874	0.263201	0.558895	0.795288	1	0.001625	0.250203	0.463851	0.676686	0.992689	0.000812	0.206336	0.450853	0.75792	0.999188	0.50528	0.072299	0.422421	0.030894	0.087805	0.003252	0.000812	0.220146	0.375305	0.619821	1	0.01381	0.056864	0.116978	0.459789	0.852965	0.001625	0.437043	0.696182	0.886271	0.996751	0.33225	0.377236	0.003249	0.187652	0.450041	0.727864	0.997563	0.376117
0.264286	0.414286	0.321429	0.201439	0.179856	0.28777	0.042857	0.164286	0.464286	0.771429	1	0.014286	0.257143	0.535714	0.75	0.992857	0.007143	0.214286	0.457143	0.685714	0.985714	0.342857	0.385714	0.271429	0.086331	0.057554	0	0.007143	0.242857	0.4	0.685714	1	0.2	0.578571	0.735714	0.85	0.978571	0.021429	0.078571	0.335714	0.457143	0.528571	0.557143	0.359712	0.028571	0.3	0.485714	0.721429	0.985714	0.414286
0.355505	0.341743	0.302752	0.252874	0.216092	0.165517	0.006881	0.227064	0.444954	0.775229	0.997706	0.004587	0.201835	0.506881	0.738532	0.993119	0.002294	0.302752	0.545872	0.71789	1	0.479358	0.066514	0.454128	0.034483	0.121839	0.002299	0.002294	0.197248	0.472477	0.793578	1	0.091743	0.486239	0.582569	0.667431	0.997706	0.034404	0.261468	0.522936	0.71789	0.986239	0.46789	0.413793	0.011468	0.33945	0.541284	0.708716	0.995413	0.380734
0.28125	0.433824	0.284926	0.254144	0.151013	0.263352	0.033088	0.336397	0.612132	0.792279	0.990809	0.005515	0.215074	0.4375	0.709559	1	0.001838	0.21875	0.470588	0.713235	0.996324	0.457721	0.09375	0.448529	0.055249	0.084715	0.003683	0.001838	0.125	0.352941	0.601103	1	0.023897	0.259191	0.363971	0.413603	0.994485	0.09375	0.454044	0.670956	0.819853	0.981618	0.623162	0.349908	0.003676	0.257353	0.455882	0.663603	0.996324	0.461397
0.266393	0.403689	0.329918	0.195072	0.195072	0.252567	0.004098	0.241803	0.518443	0.760246	0.993852	0.006148	0.19877	0.477459	0.745902	0.987705	0.002049	0.276639	0.520492	0.715164	1	0.5	0.104508	0.395492	0.067762	0.088296	0.00616	0.002049	0.159836	0.489754	0.764344	1	0.190574	0.286885	0.401639	0.588115	0.940574	0.022541	0.319672	0.530738	0.776639	0.997951	0.598361	0.353183	0.016393	0.282787	0.504098	0.713115	0.991803	0.411885
0.321429	0.3125	0.366071	0.147982	0.237668	0.237668	0.03125	0.334821	0.602679	0.78125	0.995536	0.013393	0.236607	0.464286	0.647321	0.96875	0.004464	0.15625	0.486607	0.741071	1	0.379464	0.004464	0.616071	0.008969	0.053812	0	0.004464	0.165179	0.392857	0.754464	1	0.352679	0.352679	0.352679	0.352679	0.352679	0.044643	0.272321	0.553571	0.732143	0.973214	0.549107	0.430493	0.013393	0.196429	0.486607	0.723214	0.977679	0.366071
0.325893	0.368304	0.305804	0.255034	0.205817	0.212528	0.004464	0.274554	0.522321	0.754464	0.997768	0.006696	0.207589	0.399554	0.678571	1	0.002232	0.303571	0.575893	0.785714	0.995536	0.450893	0.120536	0.428571	0.04698	0.096197	0.006711	0.002232	0.174107	0.439732	0.665179	1	0.006696	0.430804	0.591518	0.727679	0.84375	0.084821	0.247768	0.544643	0.803571	0.977679	0.589286	0.384787	0.006696	0.245536	0.484375	0.720982	0.995536	0.357143
0.454412	0.286765	0.258824	0.251841	0.260677	0.14433	0.002941	0.282353	0.525	0.742647	0.998529	0.007353	0.163235	0.485294	0.766176	1	0.001471	0.241176	0.464706	0.719118	0.994118	0.177941	0.045588	0.776471	0.019146	0.007364	0.001473	0.001471	0.063235	0.129412	0.954412	1	0.016176	0.032353	0.072059	0.083824	0.144118	0.048529	0.354412	0.548529	0.742647	0.942647	0.301471	0.483063	0.014706	0.255882	0.547059	0.805882	0.994118	0.326471
0.280232	0.401883	0.317886	0.216667	0.174638	0.267391	0.002896	0.249095	0.490949	0.748009	0.997828	0.001448	0.256336	0.511948	0.768284	0.996379	0.000724	0.230992	0.485156	0.732802	1	0.454019	0.129616	0.416365	0.055072	0.086957	0.007246	0.000724	0.302679	0.542361	0.792904	1	0.03693	0.224475	0.474294	0.765387	0.999276	0.002896	0.183201	0.465605	0.716872	0.989138	0.672701	0.32029	0.005069	0.280232	0.52643	0.759594	0.995655	0.388849
0.271845	0.436893	0.291262	0.245098	0.156863	0.205882	0.019417	0.330097	0.504854	0.747573	1	0.067961	0.262136	0.466019	0.728155	0.990291	0.009709	0.135922	0.495146	0.718447	0.961165	0.708738	0.07767	0.213592	0.058824	0.058824	0	0.009709	0.31068	0.563107	0.776699	1	0.504854	0.514563	0.718447	0.834951	0.854369	0.048544	0.087379	0.145631	0.359223	0.757282	0.495146	0.411765	0.048544	0.174757	0.504854	0.796117	0.961165	0.417476
0.31738	0.345088	0.337531	0.209596	0.247475	0.234848	0.005038	0.236776	0.428212	0.695214	1	0.012594	0.279597	0.528967	0.778338	0.989924	0.002519	0.229219	0.516373	0.740554	0.997481	0.36272	0.314861	0.322418	0.075758	0.065657	0.005051	0.002519	0.264484	0.491184	0.778338	1	0.057935	0.458438	0.564232	0.700252	0.833753	0.005038	0.100756	0.297229	0.871537	0.987406	0.536524	0.467172	0.002519	0.24937	0.491184	0.790932	0.997481	0.360202
0.308797	0.346499	0.344704	0.241007	0.219424	0.253597	0.003591	0.281867	0.497307	0.759425	0.994614	0.005386	0.238779	0.506284	0.743268	1	0.001795	0.219031	0.472172	0.736086	0.996409	0.608618	0.290844	0.100539	0.115108	0.053957	0.007194	0.001795	0.195691	0.400359	0.682226	1	0.030521	0.470377	0.648115	0.856373	0.994614	0.012567	0.341113	0.486535	0.67325	0.924596	0.526032	0.410072	0.005386	0.335727	0.590664	0.797127	0.996409	0.366248
0.289898	0.366032	0.34407	0.199413	0.18915	0.217009	0.002928	0.248902	0.515373	0.718887	1	0.004392	0.254758	0.468521	0.77306	0.998536	0.001464	0.243045	0.491947	0.734993	0.995608	0.513909	0.146413	0.339678	0.068915	0.057185	0.007331	0.001464	0.267936	0.494876	0.761347	1	0.005857	0.213763	0.427526	0.720351	0.995608	0.014641	0.245974	0.518302	0.781845	0.928258	0.572474	0.296188	0.004392	0.215227	0.534407	0.746706	0.995608	0.399707
0.311224	0.389456	0.29932	0.243612	0.192504	0.216354	0.008503	0.256803	0.508503	0.758503	0.994898	0.003401	0.241497	0.484694	0.748299	0.998299	0.001701	0.229592	0.501701	0.731293	1	0.481293	0.187075	0.331633	0.0954	0.054514	0	0.001701	0.380952	0.564626	0.806122	1	0.471088	0.583333	0.704082	0.797619	0.945578	0.005102	0.130952	0.222789	0.331633	0.969388	0.545918	0.364566	0.006803	0.27381	0.578231	0.751701	0.993197	0.428571
0.291793	0.386018	0.322188	0.204268	0.210366	0.210366	0.030395	0.282675	0.49848	0.787234	0.993921	0.006079	0.240122	0.522796	0.735562	0.984802	0.00304	0.231003	0.483283	0.729483	1	0.443769	0.097264	0.458967	0.057927	0.07622	0.003049	0.00304	0.267477	0.516717	0.705167	1	0.033435	0.072948	0.136778	0.404255	0.854103	0.015198	0.319149	0.541033	0.805471	0.975684	0.571429	0.396341	0.018237	0.237082	0.468085	0.720365	0.984802	0.419453
0.236842	0.453216	0.309942	0.205279	0.13783	0.281525	0.005848	0.207602	0.540936	0.774854	1	0.011696	0.28655	0.479532	0.733918	0.97076	0.002924	0.172515	0.48538	0.739766	0.997076	0.423977	0.190058	0.385965	0.085044	0.067449	0.002933	0.002924	0.295322	0.508772	0.722222	1	0.005848	0.157895	0.540936	0.695906	0.938596	0.026316	0.204678	0.473684	0.769006	0.982456	0.570175	0.346041	0.008772	0.225146	0.526316	0.754386	0.976608	0.476608
0.330739	0.354086	0.315175	0.247563	0.210526	0.251462	0.003891	0.241245	0.464981	0.741245	1	0.009728	0.247082	0.548638	0.768482	0.998054	0.001946	0.249027	0.476654	0.731518	0.986381	0.540856	0.138132	0.321012	0.076023	0.099415	0.005848	0.001946	0.235409	0.447471	0.731518	1	0.005837	0.13035	0.389105	0.525292	0.889105	0.040856	0.33463	0.605058	0.797665	0.992218	0.571984	0.382066	0.005837	0.254864	0.507782	0.749027	0.988327	0.381323
0.325339	0.426486	0.248175	0.268267	0.149269	0.201461	0.002086	0.247132	0.49635	0.715328	0.998957	0.007299	0.31074	0.537018	0.763295	0.989572	0.001043	0.168926	0.372263	0.776851	1	0.650678	0.078206	0.271116	0.035491	0.079332	0.006263	0.001043	0.309698	0.532847	0.776851	1	0.047967	0.078206	0.179353	0.639208	0.964546	0.04171	0.254432	0.38269	0.686131	0.997914	0.369135	0.356994	0.004171	0.196038	0.380605	0.805005	0.996872	0.45464
0.303371	0.337079	0.359551	0.20904	0.180791	0.299435	0.011236	0.235955	0.477528	0.702247	1	0.016854	0.247191	0.5	0.741573	0.966292	0.005618	0.230337	0.505618	0.792135	0.994382	0.488764	0.269663	0.241573	0.067797	0.101695	0	0.005618	0.202247	0.47191	0.707865	1	0.269663	0.449438	0.724719	0.859551	0.938202	0.022472	0.151685	0.235955	0.606742	0.988764	0.55618	0.361582	0.02809	0.297753	0.533708	0.758427	0.97191	0.370787
0.375502	0.293173	0.331325	0.205231	0.259557	0.185111	0.006024	0.236948	0.504016	0.763052	1	0.004016	0.190763	0.445783	0.680723	0.997992	0.002008	0.305221	0.548193	0.757028	0.991968	0.389558	0.118474	0.491968	0.054326	0.082495	0.006036	0.002008	0.202811	0.389558	0.624498	1	0.008032	0.208835	0.353414	0.421687	0.590361	0.036145	0.293173	0.672691	0.829317	0.991968	0.576305	0.406439	0.008032	0.218876	0.451807	0.686747	0.991968	0.283133
0.232117	0.340146	0.427737	0.144737	0.182749	0.27193	0.005839	0.265693	0.594161	0.865693	0.99562	0.00292	0.261314	0.519708	0.785401	1	0.00146	0.236496	0.446715	0.648175	0.99708	0.29927	0.024818	0.675912	0.01462	0.055556	0.002924	0.00146	0.540146	0.840876	0.916788	1	0.070073	0.659854	0.788321	0.913869	0.932847	0.00292	0.2	0.388321	0.589781	0.827737	0.694891	0.216374	0.010219	0.216058	0.416058	0.630657	0.99708	0.332847
0.17433	0.415709	0.409962	0.140115	0.128599	0.381958	0.019157	0.237548	0.568966	0.791188	0.994253	0.005747	0.233716	0.463602	0.733716	0.98659	0.001916	0.262452	0.511494	0.749042	1	0.289272	0.045977	0.664751	0.015355	0.069098	0.011516	0.001916	0.157088	0.551724	0.818008	1	0.136015	0.145594	0.683908	0.877395	0.998084	0.01341	0.260536	0.457854	0.678161	0.965517	0.773946	0.214971	0.007663	0.250958	0.492337	0.741379	0.996169	0.371648
0.148649	0.243243	0.608108	0.041096	0.109589	0.315068	0.027027	0.324324	0.364865	0.418919	1	0.040541	0.108108	0.540541	0.783784	0.932432	0.013514	0.22973	0.513514	0.72973	0.986486	0.148649	0.067568	0.783784	0.013699	0.09589	0.041096	0.013514	0.027027	0.351351	0.797297	1	0.891892	0.891892	0.945946	0.959459	0.986486	0.040541	0.216216	0.486486	0.675676	0.932432	0.662162	0.246575	0.040541	0.27027	0.554054	0.756757	0.986486	0.243243
0.35	0.331818	0.318182	0.237443	0.251142	0.200913	0.009091	0.322727	0.545455	0.768182	1	0.031818	0.168182	0.422727	0.663636	0.990909	0.004545	0.268182	0.495455	0.709091	0.968182	0.340909	0.159091	0.5	0.086758	0.09589	0.004566	0.004545	0.331818	0.563636	0.690909	1	0.009091	0.136364	0.504545	0.636364	0.881818	0.059091	0.213636	0.427273	0.781818	0.963636	0.504545	0.447489	0.013636	0.172727	0.4	0.613636	0.968182	0.340909
0.391304	0.304348	0.304348	0.285714	0.241758	0.175824	0.065217	0.23913	0.51087	0.75	0.98913	0.021739	0.152174	0.532609	0.695652	0.923913	0.01087	0.304348	0.467391	0.793478	1	0.48913	0.108696	0.402174	0.065934	0.065934	0	0.01087	0.119565	0.336957	0.565217	1	0.173913	0.184783	0.217391	0.304348	0.391304	0.434783	0.521739	0.684783	0.826087	0.934783	0.456522	0.417582	0.043478	0.282609	0.413043	0.597826	0.967391	0.391304
0.331541	0.304659	0.363799	0.199282	0.260323	0.184919	0.003584	0.252688	0.521505	0.774194	0.998208	0.026882	0.243728	0.473118	0.741935	0.982079	0.001792	0.236559	0.503584	0.729391	1	0.483871	0.154122	0.362007	0.077199	0.070018	0.001795	0.001792	0.232975	0.521505	0.732975	1	0.107527	0.37276	0.740143	0.817204	0.96595	0.005376	0.175627	0.453405	0.688172	0.994624	0.587814	0.355476	0.012545	0.301075	0.53405	0.741935	0.992832	0.310036
0.376658	0.372679	0.250663	0.264276	0.171315	0.176627	0.005305	0.278515	0.474801	0.721485	0.993369	0.002653	0.208223	0.472149	0.729443	0.998674	0.001326	0.233422	0.579576	0.797082	1	0.472149	0.087533	0.440318	0.035857	0.086321	0.003984	0.001326	0.20557	0.377984	0.757294	1	0.098143	0.364721	0.881963	0.93634	0.977454	0.046419	0.320955	0.533156	0.675066	0.994695	0.486737	0.390438	0.018568	0.302387	0.591512	0.80504	0.996021	0.401857
0.330893	0.358712	0.310395	0.230205	0.209677	0.217009	0.010249	0.229868	0.510981	0.775988	0.997072	0.002928	0.295754	0.50366	0.732064	1	0.001464	0.234261	0.462665	0.746706	0.998536	0.556369	0.15959	0.284041	0.064516	0.067449	0.008798	0.001464	0.29429	0.550512	0.692533	1	0.064422	0.158126	0.718887	0.786237	0.95022	0.055637	0.225476	0.399707	0.827233	0.991215	0.489019	0.322581	0.002928	0.247438	0.486091	0.783309	0.989751	0.363104
0.257143	0.371429	0.371429	0.246377	0.188406	0.26087	0.028571	0.357143	0.571429	0.728571	0.942857	0.085714	0.3	0.528571	0.757143	1	0.014286	0.128571	0.4	0.628571	0.985714	0.714286	0.285714	0	0.057971	0	0	0.014286	0.457143	0.642857	0.814286	1	0.057143	0.114286	0.185714	0.257143	0.442857	0	0	0	0	0	0.442857	0.405797	0.057143	0.142857	0.257143	0.6	0.985714	0.457143
0.29771	0.366412	0.335878	0.223077	0.192308	0.261538	0.038168	0.274809	0.465649	0.694656	0.984733	0.045802	0.229008	0.503817	0.778626	1	0.007634	0.206107	0.48855	0.725191	0.992366	0.351145	0.152672	0.496183	0.084615	0.069231	0.007692	0.007634	0.259542	0.580153	0.89313	1	0.015267	0.061069	0.099237	0.862595	0.984733	0.145038	0.320611	0.48855	0.656489	0.824427	0.564885	0.446154	0.015267	0.206107	0.458015	0.725191	0.969466	0.374046
0.40146	0.273723	0.324818	0.241758	0.230769	0.18315	0.007299	0.248175	0.489051	0.777372	1	0.014599	0.215328	0.525547	0.70073	0.99635	0.00365	0.262774	0.478102	0.726277	0.992701	0.255474	0.218978	0.525547	0.054945	0.084249	0.010989	0.00365	0.244526	0.485401	0.682482	1	0.211679	0.270073	0.551095	0.894161	0.992701	0.018248	0.167883	0.448905	0.759124	0.945255	0.510949	0.446886	0.010949	0.273723	0.510949	0.693431	0.992701	0.284672
0.328319	0.342708	0.328973	0.198298	0.254581	0.256545	0.001308	0.249836	0.485939	0.740353	0.998038	0.001962	0.272727	0.534336	0.784173	1	0.000654	0.235448	0.480052	0.726619	0.999346	0.771092	0.162852	0.066056	0.109293	0.025524	0.001963	0.000654	0.260301	0.532374	0.773708	1	0.00327	0.230216	0.448659	0.714192	0.968607	0.008502	0.147155	0.301504	0.455199	0.844997	0.451275	0.510471	0.001962	0.24068	0.450621	0.697842	0.99673	0.419228
0.312715	0.460481	0.226804	0.286207	0.162069	0.248276	0.006873	0.230241	0.505155	0.71134	0.986254	0.010309	0.237113	0.460481	0.745704	1	0.003436	0.298969	0.621993	0.762887	0.993127	0.71134	0.09622	0.19244	0.051724	0.058621	0.003448	0.003436	0.292096	0.491409	0.701031	1	0.075601	0.113402	0.316151	0.731959	0.95189	0.030928	0.250859	0.646048	0.927835	0.993127	0.360825	0.427586	0.044674	0.298969	0.536082	0.800687	0.993127	0.487973
0.316716	0.281525	0.40176	0.170588	0.229412	0.255882	0.005865	0.208211	0.492669	0.774194	0.997067	0.035191	0.28739	0.513196	0.768328	1	0.002933	0.252199	0.469208	0.72434	0.985337	0.211144	0.014663	0.774194	0.008824	0.073529	0.002941	0.002933	0.079179	0.40176	0.709677	1	0.01173	0.01173	0.014663	0.017595	0.035191	0.02346	0.302053	0.536657	0.753666	0.98827	0.607038	0.329412	0.014663	0.284457	0.583578	0.756598	0.982405	0.293255
0.258696	0.404348	0.336957	0.211329	0.132898	0.272331	0.004348	0.384783	0.61087	0.765217	0.997826	0.006522	0.230435	0.493478	0.693478	0.993478	0.002174	0.197826	0.391304	0.804348	1	0.469565	0.026087	0.504348	0.010893	0.050109	0.006536	0.002174	0.384783	0.586957	0.704348	1	0.354348	0.358696	0.393478	0.834783	0.841304	0.047826	0.180435	0.33913	0.791304	0.954348	0.476087	0.143791	0.05	0.204348	0.343478	0.8	0.95	0.419565
0.303922	0.421569	0.27451	0.267327	0.118812	0.267327	0.04902	0.176471	0.460784	0.813725	1	0.019608	0.27451	0.490196	0.686275	0.941176	0.009804	0.235294	0.480392	0.77451	0.990196	0.539216	0.460784	0	0.178218	0	0	0.009804	0.254902	0.480392	0.715686	1	0.039216	0.215686	0.568627	0.77451	0.990196	0	0	0	0	0	0.441176	0.435644	0.029412	0.303922	0.529412	0.666667	0.990196	0.421569
0.307692	0.292308	0.4	0.234375	0.265625	0.234375	0.030769	0.215385	0.430769	0.723077	0.984615	0.076923	0.230769	0.446154	0.676923	0.938462	0.015385	0.2	0.538462	0.784615	1	0.323077	0.415385	0.261538	0.09375	0.03125	0.03125	0.015385	0.076923	0.307692	0.615385	1	0.092308	0.169231	0.369231	0.846154	0.953846	0.415385	0.461538	0.676923	0.738462	0.815385	0.646154	0.40625	0.076923	0.215385	0.461538	0.753846	0.969231	0.184615
0.165179	0.477679	0.357143	0.201794	0.09417	0.345291	0.013393	0.272321	0.486607	0.714286	0.977679	0.008929	0.236607	0.544643	0.78125	0.995536	0.004464	0.232143	0.433036	0.660714	1	0.370536	0.058036	0.571429	0.03139	0.058296	0.013453	0.004464	0.285714	0.678571	0.90625	1	0.138393	0.147321	0.25	0.808036	0.825893	0.013393	0.227679	0.441964	0.629464	0.803571	0.638393	0.251121	0.022321	0.209821	0.450893	0.660714	0.991071	0.491071
0.315568	0.329593	0.354839	0.210674	0.22191	0.230337	0.004208	0.26087	0.492286	0.765778	0.998597	0.002805	0.204769	0.464236	0.734923	0.997195	0.001403	0.28892	0.532959	0.740533	1	0.373072	0.074334	0.552595	0.033708	0.073034	0.005618	0.001403	0.168303	0.465638	0.760168	1	0.037868	0.213184	0.42216	0.820477	0.987377	0.01122	0.309958	0.500701	0.737728	0.959327	0.580645	0.398876	0.00561	0.279102	0.500701	0.720898	0.98878	0.353436
0.292683	0.385366	0.321951	0.166667	0.20098	0.215686	0.009756	0.326829	0.604878	0.756098	1	0.019512	0.17561	0.414634	0.702439	0.97561	0.004878	0.258537	0.502439	0.770732	0.995122	0.409756	0.239024	0.35122	0.063725	0.093137	0.004902	0.004878	0.243902	0.546341	0.814634	1	0.02439	0.204878	0.273171	0.556098	0.995122	0.019512	0.356098	0.590244	0.721951	0.887805	0.502439	0.401961	0.02439	0.2	0.409756	0.64878	0.995122	0.409756
0.254613	0.414207	0.331181	0.190212	0.173592	0.268698	0.001845	0.256458	0.505535	0.75	0.99262	0.00369	0.267528	0.499077	0.74631	1	0.000923	0.228782	0.48893	0.749077	0.999077	0.429889	0.160517	0.409594	0.065559	0.078486	0.00277	0.000923	0.225092	0.438192	0.711255	1	0.009225	0.210332	0.389299	0.714022	0.98893	0.017528	0.276753	0.554428	0.785978	0.987085	0.664207	0.32687	0.008303	0.24262	0.48893	0.72786	0.997232	0.432657
0.313636	0.422727	0.263636	0.237443	0.164384	0.269406	0.013636	0.213636	0.509091	0.713636	0.986364	0.009091	0.268182	0.513636	0.795455	1	0.004545	0.231818	0.445455	0.677273	0.995455	0.359091	0.127273	0.513636	0.054795	0.100457	0.009132	0.004545	0.25	0.490909	0.754545	1	0.090909	0.3	0.409091	0.454545	0.886364	0.022727	0.204545	0.581818	0.772727	0.981818	0.545455	0.429224	0.022727	0.331818	0.513636	0.745455	0.977273	0.386364
0.241379	0.316614	0.442006	0.150943	0.18239	0.311321	0.009404	0.351097	0.567398	0.815047	0.996865	0.00627	0.213166	0.514107	0.780564	1	0.003135	0.22884	0.442006	0.645768	0.940439	0.225705	0.047022	0.727273	0.009434	0.066038	0.009434	0.003135	0.257053	0.529781	0.818182	1	0.037618	0.043887	0.473354	0.485893	0.514107	0.034483	0.23511	0.454545	0.730408	0.962382	0.69279	0.176101	0.034483	0.225705	0.435737	0.695925	0.949843	0.31348
0.271111	0.422222	0.306667	0.263393	0.21875	0.196429	0.022222	0.306667	0.493333	0.675556	0.982222	0.013333	0.2	0.444444	0.746667	1	0.004444	0.244444	0.52	0.751111	0.986667	0.542222	0.151111	0.306667	0.058036	0.075893	0.004464	0.004444	0.173333	0.413333	0.591111	1	0.071111	0.288889	0.577778	0.791111	0.928889	0.111111	0.253333	0.733333	0.875556	0.977778	0.555556	0.383929	0.008889	0.288889	0.573333	0.751111	0.973333	0.444444
0.363636	0.348485	0.287879	0.232715	0.222597	0.198988	0.003367	0.23569	0.476431	0.744108	0.998316	0.005051	0.240741	0.462963	0.740741	0.993266	0.001684	0.255892	0.552189	0.772727	1	0.493266	0.176768	0.329966	0.065767	0.072513	0.005059	0.001684	0.239057	0.481481	0.762626	1	0.038721	0.247475	0.560606	0.843434	0.919192	0.010101	0.271044	0.439394	0.681818	0.964646	0.548822	0.32715	0.006734	0.257576	0.535354	0.734007	0.994949	0.383838
0.1625	0.41	0.4275	0.16792	0.105263	0.393484	0.01	0.2125	0.4575	0.7525	1	0.005	0.2175	0.5075	0.74	0.99	0.0025	0.28	0.495	0.7375	0.995	0.2575	0.015	0.7275	0.010025	0.085213	0	0.0025	0.155	0.415	0.6375	1	0.1875	0.1875	0.195	0.1975	0.2025	0.045	0.3	0.535	0.8	0.9925	0.7375	0.255639	0.0125	0.3175	0.535	0.7625	0.9875	0.39
0.357447	0.319149	0.323404	0.24359	0.286325	0.205128	0.008511	0.268085	0.480851	0.714894	0.982979	0.021277	0.212766	0.485106	0.706383	1	0.004255	0.234043	0.519149	0.817021	0.995745	0.382979	0.268085	0.348936	0.07265	0.047009	0.012821	0.004255	0.357447	0.519149	0.706383	1	0.017021	0.493617	0.582979	0.791489	0.974468	0.021277	0.106383	0.259574	0.740426	0.944681	0.459574	0.478632	0.012766	0.217021	0.47234	0.689362	0.991489	0.33617
0.344512	0.420732	0.234756	0.238532	0.155963	0.201835	0.060976	0.359756	0.567073	0.753049	1	0.009146	0.195122	0.411585	0.72561	0.993902	0.003049	0.219512	0.478659	0.756098	0.990854	0.365854	0.015244	0.618902	0.009174	0.088685	0.003058	0.003049	0.155488	0.347561	0.664634	1	0.134146	0.134146	0.137195	0.164634	0.170732	0.009146	0.356707	0.588415	0.771341	0.954268	0.487805	0.422018	0.006098	0.170732	0.393293	0.698171	0.978659	0.460366
0.462617	0.261682	0.275701	0.230047	0.2723	0.15493	0.009346	0.280374	0.528037	0.71028	1	0.03271	0.247664	0.523364	0.808411	0.990654	0.004673	0.149533	0.425234	0.728972	0.981308	0.518692	0.042056	0.439252	0.018779	0.122066	0.018779	0.004673	0.196262	0.457944	0.808411	1	0.014019	0.018692	0.752336	0.775701	0.78972	0.023364	0.303738	0.528037	0.663551	0.976636	0.406542	0.441315	0.014019	0.158879	0.471963	0.738318	0.981308	0.285047
0.24026	0.324675	0.435065	0.163399	0.189542	0.254902	0.019481	0.24026	0.577922	0.779221	0.987013	0.077922	0.285714	0.506494	0.785714	0.980519	0.006494	0.194805	0.383117	0.655844	1	0.318182	0.058442	0.623377	0.03268	0.084967	0.006536	0.006494	0.344156	0.448052	0.805195	1	0.363636	0.37013	0.383117	0.525974	0.987013	0.012987	0.175325	0.545455	0.701299	0.935065	0.577922	0.261438	0.032468	0.201299	0.383117	0.62987	0.974026	0.363636
0.37234	0.303191	0.324468	0.256684	0.256684	0.144385	0.037234	0.297872	0.585106	0.845745	0.994681	0.010638	0.154255	0.351064	0.648936	1	0.005319	0.223404	0.5	0.68617	0.973404	0.287234	0.015957	0.696809	0	0.117647	0.010695	0.005319	0.106383	0.340426	0.68617	1	0.382979	0.382979	0.382979	0.388298	0.393617	0.031915	0.308511	0.558511	0.787234	0.978723	0.5	0.417112	0.021277	0.202128	0.446809	0.675532	0.920213	0.335106
0.184783	0.361413	0.453804	0.144414	0.138965	0.343324	0.005435	0.182065	0.4375	0.69837	0.991848	0.027174	0.222826	0.470109	0.720109	1	0.002717	0.290761	0.527174	0.755435	0.994565	0.32337	0.054348	0.622283	0.032698	0.059946	0.016349	0.002717	0.122283	0.214674	0.638587	1	0.021739	0.097826	0.171196	0.633152	0.660326	0.01087	0.377717	0.570652	0.807065	0.994565	0.722826	0.179837	0.008152	0.290761	0.497283	0.744565	0.994565	0.342391
0.247312	0.462366	0.290323	0.271739	0.119565	0.293478	0.032258	0.129032	0.612903	0.817204	0.978495	0.021505	0.268817	0.44086	0.698925	0.989247	0.010753	0.225806	0.516129	0.688172	1	0.419355	0.215054	0.365591	0.086957	0.065217	0	0.010753	0.172043	0.44086	0.752688	1	0.032258	0.075269	0.365591	0.655914	0.709677	0.193548	0.268817	0.55914	0.795699	0.892473	0.505376	0.478261	0.064516	0.225806	0.483871	0.688172	0.956989	0.473118
0.372093	0.363636	0.264271	0.271186	0.186441	0.197034	0.006342	0.257928	0.46723	0.691332	0.995772	0.019027	0.300211	0.54334	0.77167	1	0.002114	0.160677	0.484144	0.761099	0.991543	0.289641	0.164905	0.545455	0.069915	0.052966	0.006356	0.002114	0.274841	0.604651	0.809725	1	0.095137	0.710359	0.828753	0.890063	0.961945	0.008457	0.230444	0.397463	0.564482	0.991543	0.386892	0.436441	0.012685	0.241015	0.551797	0.803383	0.991543	0.363636
0.238653	0.371889	0.389458	0.18915	0.164223	0.294721	0.007321	0.325037	0.510981	0.816984	1	0.002928	0.2694	0.516837	0.758419	0.998536	0.001464	0.187408	0.45388	0.677892	0.98243	0.254758	0.02489	0.720351	0.008798	0.082111	0.002933	0.001464	0.301611	0.493411	0.77306	1	0.430454	0.553441	0.559297	0.565154	0.929722	0.005857	0.234261	0.469985	0.743777	0.992679	0.654466	0.325513	0.005857	0.221083	0.497804	0.689605	0.970717	0.38653
0.160237	0.418398	0.421365	0.111441	0.109955	0.384844	0.002967	0.264095	0.557864	0.77003	1	0.007418	0.272997	0.510386	0.740356	0.995549	0.001484	0.222552	0.458457	0.744807	0.998516	0.250742	0.091988	0.65727	0.034175	0.069837	0.013373	0.001484	0.264095	0.563798	0.716617	1	0.005935	0.094955	0.154303	0.670623	0.95549	0.037092	0.277448	0.485163	0.781899	0.997033	0.795252	0.213967	0.005935	0.228487	0.470326	0.719585	0.992582	0.367953
0.360902	0.263158	0.37594	0.151515	0.310606	0.242424	0.030075	0.218045	0.518797	0.744361	1	0.015038	0.285714	0.458647	0.684211	0.984962	0.007519	0.240602	0.488722	0.75188	0.992481	0.300752	0.165414	0.533835	0.05303	0.098485	0.007576	0.007519	0.285714	0.518797	0.691729	1	0.165414	0.195489	0.353383	0.503759	0.93985	0.030075	0.225564	0.571429	0.759398	0.969925	0.503759	0.5	0.045113	0.255639	0.43609	0.676692	0.947368	0.278195
0.315372	0.386688	0.29794	0.228571	0.196825	0.249206	0.004754	0.239303	0.475436	0.767036	0.993661	0.007924	0.285261	0.521395	0.751189	1	0.001585	0.223455	0.486529	0.735341	0.998415	0.511886	0.210777	0.277338	0.087302	0.065079	0.004762	0.001585	0.253566	0.515055	0.820919	1	0.004754	0.250396	0.431062	0.602219	0.979398	0.011094	0.198098	0.549921	0.703645	0.895404	0.576862	0.371429	0.00317	0.250396	0.492868	0.724247	0.998415	0.385103
0.405941	0.292079	0.30198	0.220844	0.253102	0.181141	0.014851	0.279703	0.529703	0.794554	1	0.00495	0.210396	0.415842	0.655941	0.980198	0.002475	0.262376	0.5	0.740099	0.992574	0.277228	0.049505	0.673267	0.027295	0.042184	0.002481	0.002475	0.10396	0.25	0.420792	1	0.054455	0.084158	0.118812	0.217822	0.410891	0.012376	0.44802	0.64604	0.819307	0.992574	0.408416	0.506203	0.009901	0.287129	0.534653	0.752475	0.992574	0.319307
0.205941	0.358416	0.435644	0.156746	0.184524	0.30754	0.00396	0.243564	0.611881	0.845545	0.990099	0.011881	0.233663	0.439604	0.724752	0.994059	0.00198	0.257426	0.49901	0.708911	1	0.326733	0.134653	0.538614	0.053571	0.061508	0.009921	0.00198	0.316832	0.649505	0.835644	1	0.093069	0.493069	0.772277	0.841584	0.99802	0.00396	0.2	0.386139	0.592079	0.940594	0.792079	0.194444	0.005941	0.223762	0.459406	0.691089	0.992079	0.326733
0.202869	0.438525	0.358607	0.151951	0.151951	0.324435	0.006148	0.286885	0.57377	0.797131	0.993852	0.004098	0.213115	0.477459	0.678279	0.997951	0.002049	0.262295	0.506148	0.782787	1	0.538934	0.153689	0.307377	0.065708	0.049281	0	0.002049	0.223361	0.452869	0.625	1	0.055328	0.168033	0.309426	0.461066	0.987705	0.006148	0.643443	0.745902	0.85041	0.969262	0.602459	0.373717	0.008197	0.276639	0.516393	0.723361	0.987705	0.436475
0.335443	0.449367	0.21519	0.248408	0.159236	0.146497	0.012658	0.158228	0.487342	0.746835	0.962025	0.018987	0.234177	0.443038	0.702532	0.993671	0.006329	0.35443	0.550633	0.740506	1	0.601266	0	0.398734	0	0.063694	0	0.006329	0.14557	0.297468	0.765823	1	0	0	0	0	0	0.341772	0.43038	0.632911	0.740506	0.936709	0.265823	0.343949	0.088608	0.348101	0.474684	0.71519	0.924051	0.474684
0.316092	0.350575	0.333333	0.213873	0.213873	0.225434	0.028736	0.218391	0.482759	0.758621	0.982759	0.011494	0.281609	0.511494	0.775862	0.994253	0.005747	0.195402	0.488506	0.678161	1	0.488506	0.155172	0.356322	0.080925	0.069364	0.011561	0.005747	0.304598	0.54023	0.741379	1	0.235632	0.344828	0.5	0.597701	0.770115	0.022989	0.103448	0.425287	0.856322	0.982759	0.477011	0.416185	0.017241	0.172414	0.425287	0.683908	0.971264	0.373563
0.213333	0.456667	0.33	0.220736	0.150502	0.301003	0.006667	0.21	0.49	0.783333	1	0.02	0.283333	0.47	0.74	0.996667	0.003333	0.22	0.54	0.733333	0.98	0.256667	0.003333	0.74	0.003344	0.09699	0.003344	0.003333	0.323333	0.54	0.793333	1	0.55	0.55	0.55	0.55	0.55	0.01	0.23	0.446667	0.733333	0.99	0.75	0.133779	0.01	0.25	0.51	0.736667	0.983333	0.413333
0.302846	0.373984	0.323171	0.226069	0.205703	0.256619	0.004065	0.231707	0.487805	0.756098	0.997967	0.012195	0.296748	0.550813	0.76626	1	0.002033	0.219512	0.463415	0.70935	0.993902	0.457317	0.221545	0.321138	0.095723	0.075356	0.00611	0.002033	0.304878	0.556911	0.737805	1	0.03252	0.25	0.565041	0.792683	0.95935	0.004065	0.168699	0.428862	0.591463	0.99187	0.648374	0.285132	0.00813	0.27439	0.497967	0.727642	0.993902	0.365854
0.374384	0.325123	0.300493	0.232673	0.242574	0.178218	0.049261	0.236453	0.463054	0.758621	0.980296	0.009852	0.211823	0.53202	0.73399	1	0.004926	0.275862	0.46798	0.719212	0.965517	0.448276	0.197044	0.35468	0.074257	0.054455	0.00495	0.004926	0.374384	0.55665	0.866995	1	0.251232	0.394089	0.46798	0.832512	0.965517	0.019704	0.103448	0.206897	0.62069	0.802956	0.517241	0.376238	0.029557	0.285714	0.561576	0.763547	0.985222	0.334975
0.332813	0.375	0.292187	0.198748	0.186228	0.239437	0.003125	0.196875	0.479687	0.764062	0.995313	0.004687	0.259375	0.492188	0.729688	0.996875	0.001563	0.310937	0.514062	0.745313	1	0.551562	0.054688	0.39375	0.032864	0.067293	0.001565	0.001563	0.271875	0.609375	0.839063	1	0.010937	0.215625	0.653125	0.775	0.96875	0.03125	0.1625	0.446875	0.567187	0.909375	0.43125	0.388106	0.007812	0.315625	0.514062	0.704688	0.99375	0.385937
0.221429	0.467857	0.310714	0.16129	0.16129	0.308244	0.028571	0.164286	0.475	0.678571	0.975	0.007143	0.278571	0.489286	0.789286	1	0.003571	0.217857	0.542857	0.753571	0.978571	0.342857	0.242857	0.414286	0.086022	0.071685	0	0.003571	0.192857	0.478571	0.778571	1	0.010714	0.132143	0.65	0.892857	0.978571	0.053571	0.325	0.464286	0.714286	0.867857	0.6	0.37276	0.010714	0.282143	0.482143	0.725	0.978571	0.525
0.273481	0.441989	0.28453	0.232687	0.177285	0.252078	0.019337	0.229282	0.527624	0.718232	0.986188	0.005525	0.279006	0.5	0.765193	1	0.002762	0.201657	0.444751	0.707182	0.994475	0.40884	0.035912	0.555249	0.01385	0.080332	0.00277	0.002762	0.273481	0.40884	0.720994	1	0.381215	0.38674	0.39779	0.726519	0.737569	0.01105	0.234807	0.538674	0.790055	0.972376	0.654696	0.34349	0.005525	0.243094	0.472376	0.754144	0.994475	0.436464
0.298969	0.396907	0.304124	0.238342	0.207254	0.274611	0.036082	0.283505	0.520619	0.798969	0.994845	0.015464	0.319588	0.572165	0.762887	1	0.005155	0.128866	0.340206	0.618557	0.958763	0.479381	0.221649	0.298969	0.067358	0.067358	0.025907	0.005155	0.252577	0.448454	0.664948	1	0.025773	0.103093	0.396907	0.520619	0.623711	0.159794	0.381443	0.793814	0.907216	0.989691	0.525773	0.331606	0.025773	0.21134	0.5	0.680412	0.979381	0.42268
0.38118	0.318979	0.299841	0.22524	0.247604	0.191693	0.015949	0.240829	0.486443	0.730463	0.995215	0.00319	0.248804	0.488038	0.763955	1	0.001595	0.266348	0.527911	0.759171	0.998405	0.295056	0.039872	0.665072	0.020767	0.084665	0.011182	0.001595	0.205742	0.494418	0.759171	1	0.004785	0.261563	0.275917	0.84051	0.913876	0.036683	0.301435	0.510367	0.728868	0.99681	0.454545	0.466454	0.004785	0.277512	0.524721	0.77193	0.99362	0.346093
0.223301	0.368932	0.407767	0.127451	0.196078	0.284314	0.038835	0.126214	0.601942	0.825243	1	0.019417	0.368932	0.543689	0.76699	0.990291	0.009709	0.165049	0.349515	0.592233	0.980583	0.514563	0	0.485437	0	0.058824	0	0.009709	0.368932	0.737864	0.864078	1	0	0	0	0	0	0.019417	0.126214	0.252427	0.514563	0.640777	0.631068	0.352941	0.029126	0.213592	0.456311	0.640777	0.980583	0.378641
0.351598	0.438356	0.210046	0.224771	0.119266	0.188073	0.013699	0.39726	0.657534	0.890411	1	0.009132	0.191781	0.356164	0.598174	0.968037	0.004566	0.315068	0.575342	0.785388	0.876712	0.538813	0.155251	0.305936	0.055046	0.082569	0	0.004566	0.228311	0.534247	0.689498	1	0.022831	0.465753	0.730594	0.840183	0.881279	0.09589	0.237443	0.360731	0.748858	0.986301	0.347032	0.293578	0.022831	0.310502	0.575342	0.785388	0.881279	0.484018
0.368421	0.300752	0.330827	0.249057	0.245283	0.226415	0.007519	0.210526	0.481203	0.710526	1	0.011278	0.270677	0.56015	0.759398	0.996241	0.003759	0.244361	0.469925	0.740602	0.981203	0.424812	0.150376	0.424812	0.05283	0.075472	0	0.003759	0.195489	0.428571	0.661654	1	0.278195	0.379699	0.582707	0.774436	0.932331	0.026316	0.218045	0.507519	0.830827	0.992481	0.530075	0.483019	0.015038	0.274436	0.526316	0.774436	0.981203	0.349624
0.256506	0.394052	0.349442	0.216418	0.186567	0.272388	0.007435	0.226766	0.427509	0.710037	0.981413	0.01487	0.271375	0.527881	0.788104	1	0.003717	0.241636	0.479554	0.70632	0.988848	0.371747	0.245353	0.3829	0.085821	0.085821	0.003731	0.003717	0.252788	0.494424	0.817844	1	0.02974	0.100372	0.263941	0.736059	0.977695	0.063197	0.412639	0.550186	0.713755	0.918216	0.583643	0.41791	0.026022	0.241636	0.509294	0.736059	0.988848	0.427509
0.310345	0.436782	0.252874	0.348837	0.116279	0.197674	0.057471	0.275862	0.425287	0.701149	0.988506	0.068966	0.241379	0.586207	0.793103	1	0.011494	0.137931	0.321839	0.551724	0.977011	0.551724	0.057471	0.390805	0.046512	0.069767	0	0.011494	0.149425	0.436782	0.816092	1	0.126437	0.126437	0.954023	0.965517	0.988506	0.264368	0.344828	0.494253	0.62069	0.724138	0.45977	0.418605	0.034483	0.195402	0.356322	0.586207	0.965517	0.448276
0.351724	0.337931	0.310345	0.217617	0.217617	0.210708	0.008621	0.27069	0.543103	0.837931	0.998276	0.005172	0.256897	0.503448	0.741379	0.991379	0.001724	0.22069	0.437931	0.668966	1	0.506897	0.062069	0.431034	0.041451	0.075993	0	0.001724	0.274138	0.634483	0.85	1	0.051724	0.541379	0.582759	0.827586	0.901724	0.006897	0.17931	0.377586	0.524138	0.996552	0.47069	0.366149	0.006897	0.215517	0.448276	0.677586	0.996552	0.351724
0.4375	0.279167	0.283333	0.205021	0.242678	0.154812	0.008333	0.2375	0.4625	0.691667	1	0.0375	0.291667	0.595833	0.820833	0.991667	0.004167	0.2	0.429167	0.725	0.995833	0.425	0.183333	0.391667	0.062762	0.07113	0.004184	0.004167	0.2875	0.441667	0.675	1	0.0125	0.066667	0.3125	0.716667	0.770833	0.070833	0.1875	0.525	0.85	0.975	0.466667	0.359833	0.0125	0.241667	0.5875	0.7625	0.979167	0.279167
0.378289	0.3125	0.309211	0.257426	0.214521	0.191419	0.016447	0.243421	0.470395	0.726974	1	0.046053	0.266447	0.555921	0.773026	0.983553	0.003289	0.200658	0.430921	0.720395	0.990132	0.338816	0.226974	0.434211	0.075908	0.082508	0.0033	0.003289	0.207237	0.467105	0.710526	1	0.105263	0.190789	0.503289	0.664474	0.993421	0.029605	0.263158	0.578947	0.825658	0.950658	0.532895	0.343234	0.006579	0.236842	0.486842	0.733553	0.986842	0.309211
0.308943	0.406504	0.284553	0.240816	0.167347	0.220408	0.01626	0.296748	0.520325	0.760163	0.99187	0.00813	0.260163	0.5	0.800813	1	0.004065	0.199187	0.434959	0.646341	0.987805	0.378049	0.028455	0.593496	0.02449	0.097959	0	0.004065	0.227642	0.418699	0.776423	1	0.211382	0.211382	0.219512	0.296748	0.304878	0.056911	0.341463	0.54065	0.743902	0.99187	0.552846	0.334694	0.069106	0.329268	0.528455	0.711382	0.97561	0.406504
0.26178	0.39267	0.34555	0.189474	0.205263	0.242105	0.057592	0.240838	0.492147	0.670157	1	0.026178	0.235602	0.560209	0.806283	0.994764	0.005236	0.219895	0.424084	0.706806	0.968586	0.413613	0.293194	0.293194	0.094737	0.063158	0	0.005236	0.167539	0.507853	0.795812	1	0.120419	0.471204	0.602094	0.811518	0.979058	0.062827	0.219895	0.303665	0.73822	0.942408	0.60733	0.421053	0.010471	0.272251	0.47644	0.732984	0.979058	0.403141
0.321429	0.339286	0.339286	0.243243	0.144144	0.261261	0.0625	0.455357	0.633929	0.776786	1	0.026786	0.258929	0.428571	0.767857	0.928571	0.008929	0.125	0.294643	0.678571	0.982143	0.258929	0.026786	0.714286	0.018018	0.072072	0.018018	0.008929	0.294643	0.357143	0.473214	1	0.401786	0.401786	0.401786	0.410714	0.491071	0.026786	0.196429	0.625	0.803571	0.982143	0.571429	0.468468	0.035714	0.1875	0.366071	0.732143	0.982143	0.357143
0.28169	0.321596	0.396714	0.183529	0.211765	0.277647	0.021127	0.340376	0.584507	0.828638	0.992958	0.004695	0.204225	0.443662	0.711268	0.997653	0.002347	0.246479	0.507042	0.692488	1	0.312207	0.091549	0.596244	0.035294	0.077647	0.021176	0.002347	0.2277	0.589202	0.842723	1	0.065728	0.098592	0.579812	0.720657	0.93662	0.004695	0.274648	0.460094	0.697183	0.988263	0.615023	0.268235	0.007042	0.244131	0.507042	0.699531	0.99061	0.340376
0.266112	0.405405	0.328482	0.225	0.1625	0.275	0.014553	0.193347	0.50104	0.719335	0.997921	0.004158	0.266112	0.486486	0.77131	0.995842	0.002079	0.259875	0.505198	0.746362	1	0.376299	0.172557	0.451143	0.05625	0.077083	0.00625	0.002079	0.316008	0.590437	0.787942	1	0.006237	0.303534	0.47817	0.72973	0.93763	0.027027	0.16632	0.428274	0.64657	0.991684	0.671518	0.3625	0.006237	0.274428	0.503119	0.777547	0.993763	0.417879
0.398058	0.315534	0.286408	0.258537	0.239024	0.190244	0.009709	0.237864	0.524272	0.781553	0.990291	0.014563	0.174757	0.383495	0.669903	0.995146	0.004854	0.296117	0.558252	0.76699	1	0.61165	0.033981	0.354369	0.02439	0.063415	0.004878	0.004854	0.208738	0.373786	0.592233	1	0.131068	0.131068	0.140777	0.252427	0.572816	0.024272	0.548544	0.703883	0.834951	0.927184	0.334951	0.468293	0.019417	0.339806	0.582524	0.771845	0.941748	0.407767
0.452055	0.273973	0.273973	0.180556	0.236111	0.125	0.027397	0.246575	0.506849	0.684932	0.958904	0.082192	0.205479	0.410959	0.643836	0.917808	0.013699	0.219178	0.616438	0.808219	1	0.479452	0.191781	0.328767	0.083333	0.055556	0	0.013699	0.356164	0.657534	0.876712	1	0.068493	0.09589	0.452055	0.794521	0.849315	0.150685	0.219178	0.30137	0.561644	0.643836	0.369863	0.472222	0.082192	0.178082	0.383562	0.630137	0.876712	0.246575
0.297674	0.376744	0.325581	0.228972	0.21028	0.275701	0.032558	0.283721	0.562791	0.804651	0.986047	0.013953	0.255814	0.469767	0.669767	0.995349	0.004651	0.2	0.474419	0.739535	1	0.413953	0.376744	0.209302	0.140187	0.074766	0	0.004651	0.251163	0.451163	0.711628	1	0.018605	0.195349	0.390698	0.572093	0.846512	0.134884	0.339535	0.762791	0.883721	0.986047	0.586047	0.317757	0.009302	0.265116	0.47907	0.683721	0.976744	0.390698
0.430435	0.278261	0.291304	0.231441	0.292576	0.152838	0.008696	0.195652	0.4	0.721739	0.995652	0.034783	0.247826	0.547826	0.826087	0.982609	0.004348	0.313043	0.530435	0.686957	1	0.413043	0.143478	0.443478	0.061135	0.078603	0	0.004348	0.386957	0.669565	0.886957	1	0.36087	0.456522	0.595652	0.7	0.926087	0.017391	0.16087	0.295652	0.521739	0.83913	0.356522	0.41048	0.021739	0.3	0.530435	0.686957	0.930435	0.326087
0.344828	0.353448	0.301724	0.313043	0.208696	0.217391	0.025862	0.284483	0.517241	0.784483	0.991379	0.034483	0.275862	0.525862	0.75	1	0.008621	0.155172	0.387931	0.724138	0.974138	0.543103	0	0.456897	0	0.104348	0	0.008621	0.284483	0.689655	0.827586	1	0	0	0	0	0	0.051724	0.215517	0.37931	0.491379	0.922414	0.431034	0.330435	0.043103	0.181034	0.353448	0.517241	0.974138	0.344828
0.391304	0.369565	0.23913	0.240876	0.19708	0.175182	0.021739	0.355072	0.550725	0.811594	0.992754	0.014493	0.15942	0.326087	0.615942	1	0.007246	0.246377	0.572464	0.724638	0.949275	0.521739	0.043478	0.434783	0.029197	0.043796	0	0.007246	0.166667	0.376812	0.507246	1	0.202899	0.202899	0.217391	0.521739	0.536232	0.130435	0.630435	0.73913	0.847826	0.956522	0.282609	0.364964	0.144928	0.23913	0.536232	0.724638	0.949275	0.391304
0.333333	0.353659	0.313008	0.22449	0.240816	0.191837	0.00813	0.231707	0.48374	0.703252	0.995935	0.020325	0.260163	0.479675	0.760163	0.99187	0.004065	0.247967	0.520325	0.764228	1	0.329268	0.126016	0.544715	0.065306	0.097959	0	0.004065	0.182927	0.434959	0.686992	1	0.036585	0.162602	0.455285	0.662602	0.776423	0.085366	0.300813	0.52439	0.808943	0.98374	0.654472	0.35102	0.028455	0.280488	0.50813	0.772358	0.98374	0.337398
0.388889	0.277778	0.333333	0.191011	0.292135	0.168539	0.066667	0.188889	0.455556	0.788889	1	0.022222	0.177778	0.411111	0.655556	0.977778	0.011111	0.277778	0.544444	0.733333	0.988889	0.155556	0	0.844444	0	0.067416	0	0.011111	0.033333	0.366667	0.755556	1	0	0	0	0	0	0.055556	0.255556	0.511111	0.722222	0.977778	0.411111	0.426966	0.088889	0.266667	0.477778	0.633333	0.977778	0.288889
0.287879	0.378788	0.333333	0.230769	0.153846	0.323077	0.106061	0.287879	0.515152	0.818182	1	0.030303	0.19697	0.5	0.666667	0.924242	0.015152	0.151515	0.424242	0.636364	0.969697	0.545455	0.454545	0	0.153846	0	0	0.015152	0.287879	0.666667	0.80303	1	0.030303	0.19697	0.409091	0.590909	0.878788	0	0	0	0	0	0.318182	0.430769	0.045455	0.348485	0.545455	0.69697	0.969697	0.484848
0.324604	0.412819	0.262578	0.224828	0.188276	0.184828	0.002068	0.273604	0.501723	0.754652	1	0.001378	0.199173	0.467264	0.802205	0.997932	0.000689	0.32736	0.518263	0.695382	0.998622	0.549966	0.102688	0.347347	0.053793	0.055172	0.004138	0.000689	0.204686	0.474156	0.808408	1	0.004135	0.303239	0.374225	0.575465	0.998622	0.015851	0.384562	0.54583	0.686423	0.986906	0.564438	0.32	0.002757	0.266023	0.500345	0.711234	0.997932	0.405238
0.357827	0.341853	0.300319	0.189103	0.176282	0.246795	0.009585	0.329073	0.597444	0.773163	0.984026	0.00639	0.230032	0.444089	0.750799	0.996805	0.003195	0.201278	0.389776	0.667732	1	0.530351	0.140575	0.329073	0.044872	0.064103	0.012821	0.003195	0.246006	0.501597	0.71885	1	0.067093	0.338658	0.571885	0.939297	0.990415	0.022364	0.223642	0.386581	0.722045	0.913738	0.412141	0.301282	0.015974	0.220447	0.386581	0.664537	0.98722	0.392971
0.38392	0.388945	0.227136	0.268612	0.183099	0.163984	0.003015	0.279397	0.534673	0.732663	1	0.00201	0.252261	0.521608	0.844221	0.99799	0.001005	0.2	0.41608	0.633166	0.998995	0.419095	0.01206	0.568844	0.006036	0.060362	0	0.001005	0.354774	0.78995	0.894472	1	0.00603	0.00804	0.091457	0.094472	0.330653	0.020101	0.215075	0.41407	0.61206	0.778894	0.380905	0.402414	0.00402	0.178894	0.365829	0.615075	0.99598	0.39598
0.20524	0.449782	0.344978	0.179825	0.135965	0.307018	0.043668	0.244541	0.545852	0.759825	0.995633	0.008734	0.213974	0.436681	0.746725	1	0.004367	0.262009	0.50655	0.716157	0.978166	0.414847	0.165939	0.419214	0.057018	0.092105	0.004386	0.004367	0.270742	0.484716	0.737991	1	0.0131	0.152838	0.572052	0.71179	0.9869	0.065502	0.253275	0.524017	0.768559	0.969432	0.650655	0.307018	0.0131	0.253275	0.515284	0.716157	0.9869	0.471616
0.351027	0.275685	0.373288	0.19554	0.207547	0.198971	0.006849	0.361301	0.672945	0.791096	1	0.003425	0.205479	0.491438	0.767123	0.988014	0.001712	0.234589	0.390411	0.561644	0.994863	0.392123	0.003425	0.604452	0.003431	0.089194	0	0.001712	0.231164	0.638699	0.768836	1	0.929795	0.929795	0.929795	0.929795	0.931507	0.005137	0.251712	0.429795	0.660959	0.993151	0.517123	0.329331	0.013699	0.268836	0.440068	0.679795	0.994863	0.291096
0.236111	0.509921	0.253968	0.222664	0.131213	0.212724	0.005952	0.188492	0.456349	0.668651	0.994048	0.003968	0.343254	0.583333	0.801587	1	0.001984	0.172619	0.353175	0.632937	0.992063	0.646825	0.103175	0.25	0.049702	0.06163	0.00994	0.001984	0.369048	0.609127	0.813492	1	0.007937	0.049603	0.337302	0.617063	0.990079	0.063492	0.164683	0.27381	0.470238	0.896825	0.5	0.357853	0.007937	0.212302	0.380952	0.714286	0.992063	0.535714
0.162037	0.351852	0.486111	0.093023	0.130233	0.330233	0.037037	0.314815	0.578704	0.810185	0.99537	0.009259	0.226852	0.458333	0.74537	1	0.00463	0.231481	0.490741	0.722222	0.990741	0.152778	0	0.847222	0	0.055814	0	0.00463	0.402778	0.527778	0.791667	1	0	0	0	0	0	0.009259	0.212963	0.490741	0.740741	0.990741	0.791667	0.186047	0.013889	0.217593	0.481481	0.731481	0.990741	0.356481
0.362887	0.374227	0.262887	0.262126	0.21775	0.171311	0.002062	0.263918	0.509278	0.727835	1	0.003093	0.260825	0.54433	0.85567	0.998969	0.001031	0.205155	0.442268	0.665979	0.996907	0.396907	0.016495	0.586598	0.009288	0.067079	0.001032	0.001031	0.27732	0.631959	0.893814	1	0.006186	0.091753	0.095876	0.697938	0.982474	0.019588	0.234021	0.459794	0.670103	0.968041	0.450515	0.437564	0.004124	0.2	0.397938	0.694845	0.996907	0.374227
0.387387	0.283784	0.328829	0.199095	0.239819	0.190045	0.013514	0.198198	0.518018	0.788288	1	0.009009	0.238739	0.427928	0.702703	0.981982	0.004505	0.247748	0.522523	0.707207	0.963964	0.324324	0.112613	0.563063	0.045249	0.063348	0.00905	0.004505	0.157658	0.698198	0.869369	1	0.018018	0.040541	0.734234	0.891892	0.941441	0.063063	0.27027	0.418919	0.612613	0.833333	0.527027	0.41629	0.018018	0.279279	0.509009	0.689189	0.945946	0.297297
0.306931	0.363036	0.330033	0.248344	0.221854	0.245033	0.019802	0.273927	0.465347	0.70297	0.993399	0.006601	0.221122	0.518152	0.775578	1	0.0033	0.234323	0.49835	0.732673	0.9967	0.39604	0.174917	0.429043	0.059603	0.066225	0	0.0033	0.207921	0.511551	0.70297	1	0.056106	0.237624	0.50495	0.673267	0.980198	0.042904	0.287129	0.475248	0.788779	0.950495	0.564356	0.350993	0.016502	0.231023	0.50165	0.69967	0.980198	0.376238
0.269565	0.35942	0.371014	0.18314	0.18314	0.267442	0.008696	0.194203	0.547826	0.713043	0.976812	0.005797	0.249275	0.501449	0.771014	1	0.002899	0.281159	0.481159	0.718841	0.997101	0.257971	0.06087	0.681159	0.02907	0.081395	0	0.002899	0.197101	0.397101	0.802899	1	0.327536	0.75942	0.782609	0.82029	0.892754	0.04058	0.243478	0.472464	0.66087	0.994203	0.626087	0.319767	0.034783	0.269565	0.46087	0.721739	0.991304	0.376812
0.239645	0.47929	0.281065	0.216617	0.163205	0.267062	0.005917	0.266272	0.58284	0.784024	0.994083	0.026627	0.236686	0.505917	0.754438	1	0.002959	0.198225	0.446746	0.704142	0.961538	0.414201	0.162722	0.423077	0.068249	0.086053	0.002967	0.002959	0.272189	0.544379	0.763314	1	0.153846	0.201183	0.381657	0.553254	0.881657	0.008876	0.115385	0.523669	0.801775	0.961538	0.656805	0.350148	0.011834	0.248521	0.494083	0.698225	0.988166	0.494083
0.165179	0.375	0.459821	0.121076	0.139013	0.358744	0.013393	0.375	0.540179	0.75	0.991071	0.008929	0.236607	0.526786	0.758929	1	0.004464	0.205357	0.433036	0.727679	0.977679	0.133929	0	0.866071	0	0.071749	0	0.004464	0.214286	0.40625	0.558036	1	0	0	0	0	0	0.026786	0.25	0.517857	0.767857	0.991071	0.754464	0.251121	0.017857	0.28125	0.513393	0.732143	0.977679	0.357143
0.129032	0.419355	0.451613	0.105691	0.105691	0.414634	0.145161	0.217742	0.5	0.75	0.983871	0.016129	0.258065	0.540323	0.717742	0.991935	0.008065	0.233871	0.419355	0.733871	1	0.16129	0.048387	0.790323	0.00813	0.073171	0.00813	0.008065	0.25	0.467742	0.604839	1	0.024194	0.024194	0.040323	0.048387	0.064516	0.072581	0.306452	0.556452	0.782258	0.983871	0.814516	0.113821	0.024194	0.266129	0.524194	0.733871	0.975806	0.370968
0.38172	0.344086	0.274194	0.27027	0.248649	0.167568	0.016129	0.306452	0.510753	0.704301	0.994624	0.026882	0.392473	0.650538	0.860215	1	0.005376	0.091398	0.247312	0.516129	0.930108	0.424731	0	0.575269	0	0.118919	0	0.005376	0.580645	0.758065	0.892473	1	0	0	0	0	0	0.032258	0.177419	0.327957	0.494624	0.833333	0.327957	0.389189	0.021505	0.096774	0.231183	0.494624	0.946237	0.370968
0.287072	0.365019	0.347909	0.207619	0.184762	0.259048	0.028517	0.247148	0.458175	0.745247	0.992395	0.011407	0.281369	0.51711	0.747148	1	0.001901	0.209125	0.480989	0.758555	0.996198	0.490494	0.13308	0.376426	0.074286	0.085714	0.017143	0.001901	0.306084	0.501901	0.752852	1	0.038023	0.357414	0.619772	0.787072	0.908745	0.003802	0.207224	0.442966	0.730038	0.988593	0.595057	0.392381	0.005703	0.254753	0.509506	0.752852	0.990494	0.380228
0.356371	0.330454	0.313175	0.238095	0.218615	0.233766	0.006479	0.25486	0.50108	0.75594	1	0.00432	0.213823	0.466523	0.725702	0.99784	0.00216	0.263499	0.5054	0.742981	0.991361	0.447084	0.287257	0.265659	0.095238	0.047619	0	0.00216	0.194384	0.423326	0.673866	1	0.021598	0.138229	0.455724	0.736501	0.993521	0.179266	0.395248	0.654428	0.803456	0.933045	0.548596	0.437229	0.021598	0.302376	0.546436	0.779698	0.989201	0.356371
0.344051	0.356913	0.299035	0.206119	0.206119	0.225443	0.003215	0.237942	0.5	0.729904	0.995177	0.008039	0.303859	0.59164	0.758842	0.993569	0.001608	0.181672	0.432476	0.76045	1	0.493569	0.162379	0.344051	0.064412	0.074074	0.006441	0.001608	0.286174	0.615756	0.792605	1	0.006431	0.110932	0.414791	0.639871	0.998392	0.061093	0.247588	0.440514	0.66881	0.959807	0.437299	0.380032	0.006431	0.236334	0.445338	0.77492	0.996785	0.353698
0.304615	0.335385	0.36	0.203704	0.20679	0.216049	0.009231	0.329231	0.575385	0.824615	1	0.018462	0.252308	0.473846	0.704615	0.987692	0.003077	0.196923	0.44	0.707692	0.996923	0.486154	0.187692	0.326154	0.08642	0.074074	0	0.003077	0.28	0.523077	0.689231	1	0.144615	0.286154	0.476923	0.713846	0.941538	0.024615	0.116923	0.452308	0.815385	0.993846	0.633846	0.351852	0.006154	0.206154	0.458462	0.710769	0.987692	0.332308
0.33957	0.415341	0.245089	0.286517	0.159176	0.210674	0.004677	0.26754	0.501403	0.723106	0.996258	0.001871	0.291862	0.542563	0.789523	1	0.000935	0.169317	0.353601	0.71188	0.999065	0.645463	0.119738	0.234799	0.050562	0.046816	0.011236	0.000935	0.366698	0.575304	0.78391	1	0.147802	0.274088	0.402245	0.727783	0.996258	0.002806	0.110384	0.24696	0.434051	0.926099	0.413471	0.348315	0.002806	0.176801	0.355472	0.6913	0.995323	0.433115
0.357143	0.34127	0.301587	0.193634	0.236074	0.196286	0.018519	0.304233	0.47619	0.701058	0.997354	0.005291	0.185185	0.529101	0.785714	1	0.002646	0.219577	0.5	0.748677	0.978836	0.505291	0.137566	0.357143	0.045093	0.071618	0.002653	0.002646	0.248677	0.455026	0.738095	1	0.060847	0.100529	0.201058	0.719577	0.796296	0.013228	0.285714	0.515873	0.84127	0.970899	0.420635	0.376658	0.007937	0.201058	0.558201	0.777778	0.986772	0.357143
0.177215	0.350211	0.472574	0.152542	0.114407	0.330508	0.008439	0.172996	0.35865	0.691983	1	0.016878	0.274262	0.518987	0.793249	0.978903	0.004219	0.253165	0.510549	0.738397	0.991561	0.261603	0.029536	0.708861	0.016949	0.084746	0	0.004219	0.303797	0.523207	0.797468	1	0.016878	0.016878	0.025316	0.810127	0.818565	0.067511	0.248945	0.489451	0.729958	0.987342	0.759494	0.211864	0.016878	0.303797	0.531646	0.755274	0.978903	0.320675
0.3	0.34375	0.35625	0.181818	0.219436	0.241379	0.028125	0.225	0.559375	0.7625	0.99375	0.00625	0.2125	0.459375	0.6875	1	0.003125	0.29375	0.515625	0.790625	0.996875	0.4875	0.19375	0.31875	0.07837	0.059561	0.009404	0.003125	0.1625	0.484375	0.696875	1	0.0125	0.290625	0.446875	0.653125	0.871875	0.1	0.375	0.621875	0.825	0.978125	0.6375	0.338558	0.0125	0.3125	0.503125	0.728125	0.9875	0.3875
0.195349	0.223256	0.581395	0.060748	0.182243	0.271028	0.009302	0.106977	0.367442	0.72093	0.990698	0.074419	0.306977	0.530233	0.748837	1	0.004651	0.255814	0.502326	0.739535	0.995349	0.139535	0.074419	0.786047	0.023364	0.060748	0.023364	0.004651	0.330233	0.646512	0.725581	1	0.023256	0.311628	0.660465	0.693023	0.711628	0.018605	0.232558	0.483721	0.772093	0.986047	0.716279	0.271028	0.018605	0.27907	0.544186	0.781395	0.995349	0.237209
0.346154	0.316239	0.337607	0.193133	0.270386	0.206009	0.012821	0.196581	0.42735	0.67094	0.995726	0.008547	0.247863	0.538462	0.833333	1	0.004274	0.273504	0.508547	0.730769	0.974359	0.423077	0.08547	0.491453	0.042918	0.111588	0	0.004274	0.200855	0.628205	0.858974	1	0.175214	0.811966	0.833333	0.92735	0.974359	0.064103	0.247863	0.41453	0.581197	0.794872	0.547009	0.377682	0.021368	0.24359	0.547009	0.760684	0.978632	0.311966
0.379581	0.32199	0.298429	0.254593	0.254593	0.19685	0.005236	0.248691	0.515707	0.777487	0.997382	0.007853	0.256545	0.528796	0.73822	0.989529	0.002618	0.21466	0.47644	0.698953	1	0.183246	0.013089	0.803665	0.005249	0.089239	0	0.002618	0.196335	0.463351	0.727749	1	0.986911	0.986911	0.989529	0.992147	0.997382	0.020942	0.272251	0.494764	0.73822	0.973822	0.544503	0.404199	0.015707	0.287958	0.5	0.730366	0.994764	0.26178
0.326648	0.358166	0.315186	0.227011	0.238506	0.270115	0.005731	0.260745	0.484241	0.696275	0.979943	0.008596	0.275072	0.56447	0.787966	1	0.002865	0.209169	0.452722	0.687679	0.991404	0.507163	0.186246	0.30659	0.074713	0.057471	0	0.002865	0.154728	0.449857	0.74212	1	0.017192	0.323782	0.518625	0.747851	0.991404	0.180516	0.346705	0.475645	0.673352	0.945559	0.512894	0.442529	0.008596	0.252149	0.472779	0.724928	0.997135	0.424069
0.264151	0.417191	0.318658	0.214286	0.184874	0.277311	0.035639	0.245283	0.503145	0.735849	0.962264	0.004193	0.262055	0.509434	0.748428	0.995807	0.002096	0.213836	0.459119	0.75891	1	0.473795	0.161426	0.36478	0.067227	0.058824	0	0.002096	0.331237	0.566038	0.754717	1	0.048218	0.236897	0.459119	0.710692	0.9413	0.004193	0.169811	0.381551	0.675052	0.997904	0.595388	0.361345	0.004193	0.24109	0.484277	0.744235	0.995807	0.431866
0.256055	0.456747	0.287197	0.253472	0.121528	0.295139	0.00692	0.231834	0.484429	0.761246	0.986159	0.017301	0.249135	0.474048	0.705882	0.99654	0.00346	0.235294	0.525952	0.782007	1	0.408304	0.16609	0.425606	0.076389	0.083333	0	0.00346	0.214533	0.515571	0.709343	1	0.038062	0.224913	0.356401	0.539792	0.854671	0.083045	0.294118	0.564014	0.865052	0.989619	0.595156	0.368056	0.017301	0.252595	0.484429	0.747405	0.989619	0.467128
0.358108	0.317568	0.324324	0.204082	0.210884	0.217687	0.033784	0.283784	0.486486	0.722973	1	0.02027	0.162162	0.452703	0.709459	0.952703	0.006757	0.22973	0.547297	0.790541	0.986486	0.418919	0.121622	0.459459	0.054422	0.136054	0.013605	0.006757	0.364865	0.560811	0.831081	1	0.344595	0.574324	0.608108	0.675676	0.97973	0.02027	0.168919	0.310811	0.648649	0.918919	0.418919	0.47619	0.027027	0.22973	0.540541	0.75	0.986486	0.324324
0.333333	0.400585	0.266082	0.237537	0.167155	0.222874	0.008772	0.307018	0.502924	0.774854	0.994152	0.005848	0.248538	0.538012	0.777778	1	0.002924	0.181287	0.380117	0.684211	0.997076	0.549708	0.032164	0.418129	0.017595	0.046921	0	0.002924	0.502924	0.672515	0.862573	1	0.678363	0.681287	0.690058	0.745614	0.836257	0.011696	0.131579	0.248538	0.359649	0.766082	0.453216	0.234604	0.011696	0.210526	0.473684	0.681287	0.997076	0.400585
0.29375	0.39375	0.3125	0.238994	0.18239	0.264151	0.06875	0.23125	0.4	0.61875	1	0.0125	0.275	0.525	0.76875	0.99375	0.00625	0.19375	0.53125	0.7375	0.95625	0.38125	0.15	0.46875	0.050314	0.062893	0	0.00625	0.25625	0.5125	0.71875	1	0.01875	0.05	0.2375	0.49375	0.68125	0.08125	0.325	0.55625	0.78125	0.95625	0.5125	0.352201	0.01875	0.325	0.58125	0.81875	0.95	0.3875
0.182692	0.348558	0.46875	0.120482	0.180723	0.342169	0.007212	0.216346	0.512019	0.723558	1	0.004808	0.235577	0.509615	0.716346	0.990385	0.002404	0.264423	0.466346	0.764423	0.987981	0.377404	0.043269	0.579327	0.024096	0.077108	0	0.002404	0.100962	0.5	0.598558	1	0.03125	0.103365	0.182692	0.524038	0.677885	0.125	0.326923	0.612981	0.819712	0.992788	0.704327	0.226506	0.03125	0.271635	0.478365	0.764423	0.983173	0.34375
0.211454	0.497797	0.290749	0.185841	0.110619	0.318584	0.017621	0.259912	0.528634	0.854626	1	0.008811	0.255507	0.524229	0.784141	0.977974	0.004405	0.211454	0.418502	0.660793	0.9163	0.519824	0.123348	0.356828	0.044248	0.115044	0.00885	0.004405	0.281938	0.550661	0.845815	1	0.026432	0.321586	0.352423	0.405286	0.748899	0.013216	0.167401	0.475771	0.709251	0.991189	0.585903	0.336283	0.008811	0.290749	0.502203	0.713656	0.951542	0.471366
0.187817	0.365482	0.446701	0.147959	0.142857	0.311224	0.010152	0.228426	0.406091	0.908629	1	0.045685	0.243655	0.477157	0.71066	0.969543	0.005076	0.269036	0.532995	0.751269	0.979695	0.218274	0.015228	0.766497	0.010204	0.071429	0	0.005076	0.187817	0.472081	0.812183	1	0.482234	0.482234	0.482234	0.48731	0.492386	0.010152	0.263959	0.532995	0.725888	0.944162	0.741117	0.173469	0.015228	0.238579	0.461929	0.720812	0.979695	0.329949
0.219388	0.392857	0.387755	0.169231	0.158974	0.241026	0.020408	0.311224	0.647959	0.790816	0.994898	0.010204	0.163265	0.418367	0.72449	0.989796	0.005102	0.306122	0.484694	0.688776	1	0.352041	0.066327	0.581633	0.041026	0.051282	0.010256	0.005102	0.086735	0.647959	0.867347	1	0.295918	0.780612	0.816327	0.831633	0.984694	0.091837	0.285714	0.454082	0.596939	0.979592	0.494898	0.358974	0.02551	0.265306	0.494898	0.658163	0.984694	0.423469
0.139535	0.48062	0.379845	0.179688	0.054688	0.273438	0.023256	0.333333	0.589147	0.736434	0.945736	0.03876	0.209302	0.465116	0.713178	0.96124	0.007752	0.255814	0.51938	0.782946	1	0.542636	0.131783	0.325581	0.054688	0.085938	0.007812	0.007752	0.372093	0.604651	0.744186	1	0.325581	0.775194	0.806202	0.837209	0.992248	0.015504	0.162791	0.248062	0.48062	0.573643	0.472868	0.34375	0.031008	0.263566	0.51938	0.767442	0.984496	0.511628
0.271758	0.365897	0.362345	0.208185	0.190391	0.252669	0.007105	0.232682	0.483126	0.738899	0.996448	0.003552	0.287744	0.51865	0.742451	1	0.001776	0.22913	0.479574	0.756661	0.98579	0.461812	0.207815	0.330373	0.076512	0.065836	0.001779	0.001776	0.291297	0.545293	0.724689	1	0.083481	0.21492	0.513321	0.756661	0.891652	0.01421	0.145648	0.35524	0.801066	0.98579	0.614565	0.338078	0.005329	0.284192	0.511545	0.774423	0.98579	0.396092
0.300987	0.371711	0.327303	0.205931	0.222405	0.248764	0.003289	0.245066	0.440789	0.726974	0.983553	0.008224	0.289474	0.559211	0.779605	0.998355	0.001645	0.217105	0.427632	0.725329	1	0.467105	0.240132	0.292763	0.102142	0.052718	0	0.001645	0.409539	0.608553	0.8125	1	0.067434	0.554276	0.702303	0.835526	0.995066	0.032895	0.157895	0.251645	0.34375	0.440789	0.578947	0.395387	0.004934	0.264803	0.547697	0.774671	0.996711	0.375
0.443831	0.320442	0.235727	0.287823	0.208487	0.162362	0.01105	0.246777	0.478821	0.73849	1	0.003683	0.302026	0.546961	0.793738	0.990792	0.001842	0.187845	0.456722	0.692449	0.992634	0.362799	0.066298	0.570902	0.02583	0.03321	0	0.001842	0.54512	0.707182	0.848987	1	0.519337	0.895028	0.922652	0.955801	0.990792	0.01105	0.171271	0.327808	0.469613	0.767956	0.38674	0.439114	0.005525	0.224678	0.460405	0.731123	0.992634	0.32965
0.219136	0.435185	0.345679	0.188854	0.164087	0.250774	0.009259	0.240741	0.478395	0.638889	0.996914	0.006173	0.234568	0.490741	0.787037	0.987654	0.003086	0.259259	0.518519	0.737654	1	0.493827	0.160494	0.345679	0.068111	0.037152	0	0.003086	0.271605	0.561728	0.802469	1	0.101852	0.358025	0.444444	0.722222	0.929012	0.006173	0.154321	0.475309	0.669753	0.993827	0.549383	0.328173	0.012346	0.216049	0.419753	0.719136	0.993827	0.466049
0.321285	0.429719	0.248996	0.25	0.125	0.217742	0.016064	0.37751	0.562249	0.783133	1	0.012048	0.212851	0.518072	0.718876	0.995984	0.004016	0.13253	0.321285	0.64257	0.955823	0.586345	0.056225	0.35743	0.032258	0.080645	0	0.004016	0.413655	0.598394	0.823293	1	0.502008	0.60241	0.795181	0.807229	0.863454	0.016064	0.120482	0.313253	0.405622	0.959839	0.349398	0.25	0.044177	0.128514	0.301205	0.554217	0.971888	0.429719
0.367737	0.327982	0.304281	0.219587	0.212701	0.198164	0.001529	0.33945	0.536697	0.742355	1	0.002294	0.181193	0.444954	0.751529	0.998471	0.000765	0.240061	0.487768	0.750765	0.999235	0.279052	0.066514	0.654434	0.026779	0.063504	0.002295	0.000765	0.090979	0.225535	0.700306	1	0.061927	0.127676	0.185015	0.219419	0.982416	0.00841	0.39526	0.570336	0.756881	0.997706	0.454128	0.425402	0.007645	0.220948	0.470948	0.747706	0.997706	0.34633
0.296296	0.382716	0.320988	0.225	0.25	0.2375	0.098765	0.234568	0.419753	0.617284	0.987654	0.024691	0.209877	0.555556	0.814815	1	0.012346	0.17284	0.432099	0.666667	0.888889	0.419753	0.209877	0.37037	0.1	0.1	0	0.012346	0.308642	0.580247	0.777778	1	0.037037	0.074074	0.382716	0.679012	0.765432	0.148148	0.222222	0.481481	0.814815	0.962963	0.407407	0.425	0.037037	0.222222	0.493827	0.691358	0.925926	0.419753
0.281818	0.410909	0.307273	0.23133	0.191257	0.258652	0.009091	0.296364	0.503636	0.794545	0.992727	0.003636	0.243636	0.469091	0.705455	1	0.001818	0.223636	0.510909	0.745455	0.998182	0.689091	0.085455	0.225455	0.045537	0.04918	0.001821	0.001818	0.276364	0.503636	0.781818	1	0.070909	0.14	0.405455	0.656364	0.950909	0.014545	0.163636	0.476364	0.578182	0.996364	0.632727	0.309654	0.014545	0.230909	0.507273	0.729091	0.996364	0.42
0.344633	0.276836	0.378531	0.176136	0.289773	0.238636	0.016949	0.242938	0.474576	0.79661	0.99435	0.011299	0.384181	0.531073	0.745763	1	0.00565	0.175141	0.429379	0.700565	0.977401	0.40678	0.19774	0.39548	0.073864	0.096591	0.005682	0.00565	0.378531	0.542373	0.79661	1	0.016949	0.056497	0.40678	0.508475	0.824859	0.079096	0.265537	0.661017	0.757062	0.983051	0.587571	0.329545	0.011299	0.254237	0.485876	0.711864	0.966102	0.271186
0.157895	0.526316	0.315789	0.132743	0.061947	0.345133	0.04386	0.27193	0.342105	0.412281	0.842105	0.017544	0.210526	0.526316	0.780702	0.991228	0.008772	0.333333	0.54386	0.72807	1	0.201754	0	0.798246	0	0.070796	0	0.008772	0.263158	0.561404	0.824561	1	0	0	0	0	0	0.026316	0.210526	0.482456	0.692982	0.991228	0.798246	0.123894	0.026316	0.210526	0.508772	0.72807	0.973684	0.473684
0.305195	0.396104	0.298701	0.254902	0.196078	0.254902	0.012987	0.181818	0.344156	0.623377	1	0.038961	0.350649	0.538961	0.75974	0.993506	0.006494	0.220779	0.571429	0.779221	0.954545	0.396104	0.155844	0.448052	0.052288	0.091503	0	0.006494	0.266234	0.525974	0.766234	1	0.019481	0.051948	0.253247	0.5	0.668831	0.084416	0.324675	0.551948	0.837662	0.954545	0.519481	0.326797	0.019481	0.233766	0.577922	0.818182	0.948052	0.318182
0.335436	0.348055	0.316509	0.207368	0.209474	0.221053	0.003155	0.230284	0.490011	0.732913	0.990536	0.002103	0.309148	0.507886	0.722397	1	0.001052	0.223975	0.514196	0.772871	0.992639	0.35857	0.02734	0.61409	0.014737	0.096842	0.004211	0.001052	0.351209	0.451104	0.613039	1	0.030494	0.348055	0.427971	0.590957	0.980021	0.005258	0.225026	0.582545	0.789695	0.993691	0.488959	0.437895	0.004206	0.228181	0.537329	0.766562	0.995794	0.425868
0.406863	0.259804	0.333333	0.211823	0.270936	0.162562	0.014706	0.259804	0.52451	0.745098	0.980392	0.009804	0.181373	0.397059	0.671569	0.990196	0.004902	0.29902	0.544118	0.759804	1	0.372549	0.04902	0.578431	0.024631	0.1133	0.014778	0.004902	0.269608	0.544118	0.779412	1	0.191176	0.196078	0.372549	0.54902	0.808824	0.034314	0.230392	0.470588	0.740196	0.960784	0.460784	0.403941	0.02451	0.313725	0.495098	0.754902	0.960784	0.308824
0.180233	0.412791	0.406977	0.140351	0.134503	0.350877	0.023256	0.122093	0.25	0.790698	1	0.011628	0.296512	0.517442	0.831395	0.988372	0.005814	0.267442	0.540698	0.686047	0.994186	0.290698	0.023256	0.686047	0.017544	0.064327	0.005848	0.005814	0.104651	0.843023	0.912791	1	0.081395	0.081395	0.087209	0.959302	0.965116	0.023256	0.261628	0.436047	0.622093	0.813953	0.639535	0.269006	0.017442	0.267442	0.447674	0.69186	0.97093	0.389535
0.256098	0.402439	0.341463	0.185185	0.185185	0.283951	0.02439	0.146341	0.463415	0.621951	0.97561	0.012195	0.195122	0.378049	0.743902	1	0.085366	0.329268	0.536585	0.719512	0.939024	0.634146	0.280488	0.085366	0.148148	0.024691	0	0.012195	0.158537	0.378049	0.695122	1	0.182927	0.353659	0.512195	0.609756	0.756098	0.792683	0.792683	0.817073	0.841463	0.865854	0.512195	0.320988	0.170732	0.329268	0.536585	0.719512	0.914634	0.47561
0.355906	0.372441	0.271654	0.257683	0.204098	0.202522	0.002362	0.230709	0.496063	0.748031	0.999213	0.00315	0.21811	0.411024	0.704724	0.998425	0.000787	0.382677	0.595276	0.809449	1	0.513386	0.123622	0.362992	0.042553	0.064618	0.001576	0.000787	0.209449	0.35748	0.722835	1	0.13937	0.565354	0.666929	0.767717	0.997638	0.005512	0.395276	0.514961	0.833858	0.984252	0.455906	0.381403	0.005512	0.325197	0.588976	0.796063	0.997638	0.396063
0.157044	0.399538	0.443418	0.12037	0.12037	0.356481	0.011547	0.277136	0.489607	0.672055	0.939954	0.027714	0.254042	0.510393	0.787529	0.993072	0.002309	0.226328	0.505774	0.750577	1	0.233256	0.060046	0.706697	0.023148	0.074074	0.013889	0.002309	0.295612	0.508083	0.660508	1	0.198614	0.387991	0.87067	0.900693	0.937644	0.004619	0.221709	0.461894	0.732102	0.997691	0.745958	0.208333	0.009238	0.240185	0.505774	0.778291	0.990762	0.404157
0.332278	0.379747	0.287975	0.257143	0.177778	0.2	0.006329	0.193038	0.449367	0.727848	1	0.012658	0.300633	0.531646	0.772152	0.996835	0.003165	0.202532	0.443038	0.721519	0.990506	0.455696	0.14557	0.398734	0.066667	0.073016	0.003175	0.003165	0.392405	0.572785	0.81962	1	0.193038	0.306962	0.481013	0.68038	0.990506	0.015823	0.132911	0.329114	0.626582	0.952532	0.598101	0.349206	0.015823	0.259494	0.509494	0.708861	0.990506	0.398734
0.329843	0.34555	0.324607	0.221053	0.210526	0.284211	0.010471	0.246073	0.560209	0.801047	0.968586	0.020942	0.272251	0.471204	0.691099	0.994764	0.005236	0.198953	0.439791	0.748691	1	0.387435	0.036649	0.575916	0.010526	0.105263	0.010526	0.005236	0.366492	0.586387	0.722513	1	0.371728	0.371728	0.382199	0.39267	0.670157	0.036649	0.209424	0.497382	0.759162	0.973822	0.549738	0.421053	0.041885	0.219895	0.434555	0.680628	0.984293	0.308901
0.315556	0.346667	0.337778	0.245536	0.21875	0.241071	0.008889	0.231111	0.488889	0.715556	0.995556	0.044444	0.266667	0.52	0.791111	1	0.004444	0.217778	0.462222	0.711111	0.991111	0.36	0.12	0.52	0.049107	0.09375	0.004464	0.004444	0.262222	0.591111	0.835556	1	0.013333	0.035556	0.617778	0.773333	0.942222	0.08	0.231111	0.395556	0.68	0.991111	0.542222	0.491071	0.013333	0.222222	0.511111	0.76	0.986667	0.377778
0.337349	0.349398	0.313253	0.195122	0.243902	0.195122	0.024096	0.216867	0.60241	0.771084	0.987952	0.048193	0.228916	0.46988	0.614458	0.963855	0.012048	0.240964	0.421687	0.759036	1	0.506024	0.168675	0.325301	0.073171	0.097561	0	0.012048	0.337349	0.493976	0.662651	1	0.253012	0.277108	0.445783	0.927711	0.975904	0.060241	0.120482	0.204819	0.746988	0.855422	0.578313	0.439024	0.036145	0.26506	0.409639	0.746988	0.975904	0.373494
0.261538	0.492308	0.246154	0.203125	0.140625	0.265625	0.107692	0.415385	0.492308	0.830769	0.969231	0.030769	0.2	0.384615	0.707692	0.984615	0.015385	0.153846	0.507692	0.661538	1	0.723077	0.015385	0.261538	0.015625	0.078125	0.015625	0.015385	0.215385	0.4	0.707692	1	0.523077	0.523077	0.523077	0.523077	0.523077	0.092308	0.415385	0.476923	0.784615	0.861538	0.353846	0.375	0.092308	0.338462	0.584615	0.753846	0.861538	0.446154
0.299435	0.370056	0.330508	0.1983	0.235127	0.243626	0.00565	0.254237	0.570621	0.793785	1	0.008475	0.276836	0.437853	0.70339	0.991525	0.002825	0.194915	0.471751	0.731638	0.997175	0.454802	0.129944	0.415254	0.048159	0.065156	0.002833	0.002825	0.29661	0.59322	0.788136	1	0.432203	0.776836	0.920904	0.954802	0.99435	0.014124	0.166667	0.327684	0.531073	0.680791	0.539548	0.351275	0.014124	0.217514	0.440678	0.666667	0.997175	0.418079
0.346774	0.346774	0.306452	0.203252	0.252033	0.195122	0.032258	0.169355	0.387097	0.556452	0.943548	0.016129	0.233871	0.572581	0.798387	1	0.008065	0.25	0.596774	0.774194	0.983871	0.435484	0.241935	0.322581	0.073171	0.056911	0.00813	0.008065	0.370968	0.508065	0.733871	1	0.403226	0.629032	0.693548	0.798387	0.991935	0.032258	0.104839	0.25	0.330645	0.943548	0.459677	0.292683	0.056452	0.290323	0.637097	0.806452	0.975806	0.41129
0.246094	0.519531	0.234375	0.211765	0.14902	0.25098	0.019531	0.253906	0.507812	0.761719	0.964844	0.015625	0.300781	0.539062	0.734375	0.996094	0.003906	0.128906	0.363281	0.636719	1	0.683594	0.023438	0.292969	0.015686	0.094118	0	0.003906	0.292969	0.507812	0.75	1	0.164062	0.164062	0.171875	0.175781	0.957031	0.007812	0.074219	0.390625	0.742188	0.902344	0.40625	0.392157	0.011719	0.179688	0.398438	0.75	0.980469	0.515625
0.233038	0.445428	0.321534	0.195266	0.147929	0.292899	0.014749	0.150442	0.439528	0.702065	0.982301	0.0059	0.289086	0.519174	0.80236	1	0.00295	0.256637	0.489676	0.740413	0.976401	0.421829	0.238938	0.339233	0.094675	0.076923	0.005917	0.00295	0.174041	0.480826	0.761062	1	0.032448	0.256637	0.504425	0.749263	0.973451	0.082596	0.292035	0.454277	0.716814	0.890855	0.646018	0.337278	0.011799	0.280236	0.483776	0.758112	0.979351	0.492625
0.199203	0.378486	0.422311	0.14	0.16	0.3	0.007968	0.294821	0.577689	0.884462	1	0.035857	0.266932	0.505976	0.733068	0.984064	0.003984	0.187251	0.450199	0.705179	0.996016	0.262948	0.059761	0.677291	0.032	0.056	0.008	0.003984	0.083665	0.553785	0.721116	1	0.011952	0.01992	0.099602	0.605578	0.780876	0.091633	0.282869	0.478088	0.820717	0.992032	0.784861	0.176	0.011952	0.262948	0.474104	0.717131	0.972112	0.366534
0.316456	0.360759	0.322785	0.178344	0.203822	0.242038	0.012658	0.177215	0.43038	0.71519	0.974684	0.031646	0.246835	0.531646	0.721519	0.987342	0.006329	0.234177	0.481013	0.810127	1	0.348101	0.196203	0.455696	0.063694	0.063694	0.012739	0.006329	0.234177	0.512658	0.721519	1	0.367089	0.405063	0.481013	0.879747	0.955696	0.012658	0.164557	0.322785	0.746835	0.974684	0.525316	0.407643	0.025316	0.291139	0.531646	0.734177	0.962025	0.316456
0.373134	0.289552	0.337313	0.203593	0.236527	0.203593	0.00597	0.226866	0.531343	0.78806	1	0.008955	0.238806	0.450746	0.644776	0.952239	0.002985	0.274627	0.489552	0.746269	0.997015	0.361194	0.170149	0.468657	0.077844	0.095808	0	0.002985	0.214925	0.435821	0.647761	1	0.062687	0.358209	0.510448	0.841791	0.949254	0.008955	0.226866	0.561194	0.758209	0.99403	0.632836	0.377246	0.008955	0.286567	0.513433	0.713433	0.997015	0.286567
0.291262	0.429612	0.279126	0.233577	0.160584	0.253041	0.009709	0.315534	0.546117	0.754854	0.987864	0.004854	0.206311	0.485437	0.737864	0.997573	0.002427	0.262136	0.475728	0.762136	1	0.458738	0.128641	0.412621	0.053528	0.092457	0	0.002427	0.186893	0.466019	0.752427	1	0.072816	0.308252	0.449029	0.735437	0.997573	0.007282	0.283981	0.519417	0.706311	0.970874	0.604369	0.316302	0.012136	0.271845	0.512136	0.740291	0.995146	0.441748
0.314286	0.371429	0.314286	0.221311	0.192623	0.245902	0.008163	0.273469	0.526531	0.763265	1	0.02449	0.220408	0.477551	0.746939	0.995918	0.004082	0.244898	0.481633	0.714286	0.987755	0.395918	0.183673	0.420408	0.07377	0.090164	0	0.004082	0.355102	0.502041	0.771429	1	0.089796	0.216327	0.428571	0.738776	0.865306	0.012245	0.155102	0.477551	0.689796	0.971429	0.579592	0.360656	0.016327	0.22449	0.481633	0.693878	0.991837	0.37551
0.290679	0.518167	0.191153	0.243671	0.113924	0.189873	0.007899	0.203791	0.413902	0.661927	0.99842	0.00316	0.345972	0.578199	0.78673	0.995261	0.00158	0.129542	0.349131	0.682464	1	0.774092	0.058452	0.167457	0.023734	0.030063	0.007911	0.00158	0.369668	0.563981	0.756714	1	0.06793	0.094787	0.118483	0.151659	0.876777	0.009479	0.050553	0.203791	0.875197	0.973144	0.225908	0.208861	0.006319	0.104265	0.21643	0.853081	0.990521	0.526066
0.356757	0.340541	0.302703	0.23913	0.206522	0.195652	0.010811	0.340541	0.578378	0.794595	0.994595	0.016216	0.275676	0.475676	0.67027	0.978378	0.005405	0.113514	0.318919	0.762162	1	0.464865	0.048649	0.486486	0.027174	0.081522	0.005435	0.005405	0.351351	0.47027	0.681081	1	0.227027	0.232432	0.243243	0.264865	0.659459	0.021622	0.135135	0.572973	0.794595	0.989189	0.6	0.326087	0.021622	0.178378	0.475676	0.697297	0.983784	0.372973
0.346049	0.356948	0.297003	0.273224	0.226776	0.185792	0.00545	0.258856	0.47139	0.776567	1	0.010899	0.283379	0.553134	0.817439	0.997275	0.002725	0.212534	0.408719	0.613079	0.956403	0.525886	0.13079	0.343324	0.060109	0.098361	0.016393	0.002725	0.294278	0.599455	0.825613	1	0.035422	0.084469	0.201635	0.362398	0.523161	0.122616	0.310627	0.53951	0.683924	0.956403	0.514986	0.360656	0.019074	0.247956	0.422343	0.613079	0.980926	0.376022
0.339744	0.317308	0.342949	0.270096	0.254019	0.180064	0.016026	0.237179	0.496795	0.74359	1	0.009615	0.189103	0.432692	0.717949	0.996795	0.003205	0.298077	0.548077	0.759615	0.987179	0.298077	0.009615	0.692308	0.003215	0.093248	0.003215	0.003205	0.339744	0.580128	0.762821	1	0.503205	0.503205	0.503205	0.50641	0.509615	0.025641	0.208333	0.458333	0.695513	0.987179	0.570513	0.340836	0.041667	0.25641	0.509615	0.701923	0.987179	0.310897
0.318841	0.347826	0.333333	0.225455	0.2	0.269091	0.014493	0.300725	0.521739	0.731884	1	0.007246	0.257246	0.532609	0.804348	0.996377	0.003623	0.210145	0.442029	0.663043	0.992754	0.264493	0.192029	0.543478	0.076364	0.061818	0.003636	0.003623	0.192029	0.358696	0.836957	1	0.097826	0.206522	0.268116	0.594203	0.971014	0.007246	0.416667	0.568841	0.76087	0.98913	0.518116	0.421818	0.007246	0.163043	0.387681	0.710145	0.992754	0.358696
0.239362	0.393617	0.367021	0.192513	0.139037	0.299465	0.015957	0.329787	0.542553	0.696809	0.968085	0.010638	0.223404	0.425532	0.728723	0.989362	0.005319	0.18617	0.478723	0.765957	1	0.473404	0.292553	0.234043	0.128342	0.074866	0	0.005319	0.303191	0.505319	0.739362	1	0.132979	0.223404	0.473404	0.68617	0.920213	0.037234	0.095745	0.441489	0.781915	0.840426	0.680851	0.320856	0.026596	0.191489	0.473404	0.744681	0.984043	0.409574
0.449541	0.309633	0.240826	0.275862	0.216092	0.137931	0.016055	0.293578	0.481651	0.786697	0.995413	0.006881	0.277523	0.59633	0.747706	0.988532	0.002294	0.12156	0.362385	0.633028	1	0.509174	0.022936	0.46789	0.018391	0.068966	0.004598	0.002294	0.497706	0.639908	0.832569	1	0.252294	0.254587	0.261468	0.557339	0.892202	0.034404	0.155963	0.321101	0.449541	0.963303	0.272936	0.381609	0.006881	0.112385	0.385321	0.683486	0.990826	0.337156
0.364929	0.317536	0.317536	0.252381	0.204762	0.204762	0.009479	0.246445	0.554502	0.763033	0.995261	0.037915	0.265403	0.445498	0.663507	0.962085	0.004739	0.208531	0.459716	0.767773	1	0.388626	0.175355	0.436019	0.057143	0.066667	0	0.004739	0.199052	0.412322	0.578199	1	0.056872	0.118483	0.227488	0.327014	0.398104	0.151659	0.563981	0.706161	0.829384	0.985782	0.507109	0.314286	0.047393	0.222749	0.459716	0.7109	0.985782	0.2891
0.303468	0.384393	0.312139	0.228986	0.17971	0.246377	0.00578	0.265896	0.520231	0.722543	1	0.008671	0.219653	0.459538	0.765896	0.99711	0.00289	0.248555	0.488439	0.748555	0.99422	0.482659	0.245665	0.271676	0.092754	0.057971	0	0.00289	0.245665	0.49422	0.760116	1	0.060694	0.280347	0.462428	0.803468	0.968208	0.095376	0.196532	0.526012	0.702312	0.939306	0.621387	0.382609	0.014451	0.263006	0.473988	0.710983	0.976879	0.375723
0.306283	0.329843	0.363874	0.186352	0.217848	0.251969	0.007853	0.191099	0.447644	0.735602	0.958115	0.005236	0.282723	0.510471	0.746073	1	0.002618	0.246073	0.520942	0.753927	0.997382	0.531414	0.36911	0.099476	0.120735	0.020997	0	0.002618	0.26178	0.492147	0.746073	1	0.167539	0.395288	0.60733	0.787958	0.994764	0.007853	0.054974	0.089005	0.112565	0.146597	0.599476	0.314961	0.018325	0.303665	0.526178	0.732984	0.997382	0.384817
0.287183	0.390679	0.322138	0.242798	0.164609	0.233196	0.004798	0.228924	0.457162	0.779301	0.996573	0.002056	0.270048	0.501714	0.771076	0.999315	0.000685	0.252228	0.531186	0.711446	1	0.553804	0.17889	0.267306	0.072702	0.042524	0.002743	0.000685	0.263194	0.52159	0.82865	1	0.032214	0.156271	0.26525	0.542152	0.998629	0.004112	0.390679	0.587389	0.697053	0.939685	0.595613	0.323731	0.003427	0.244003	0.516107	0.733379	0.997944	0.403701
0.307002	0.378815	0.314183	0.246403	0.203237	0.23741	0.003591	0.262118	0.509874	0.770197	0.980251	0.008977	0.192101	0.438061	0.732496	1	0.001795	0.283662	0.533214	0.743268	0.996409	0.439856	0.093357	0.466786	0.05036	0.079137	0	0.001795	0.177738	0.394973	0.685817	1	0.055655	0.201077	0.310592	0.375224	0.994614	0.016158	0.416517	0.640934	0.81149	0.980251	0.606822	0.298561	0.008977	0.236984	0.473968	0.664273	0.996409	0.393178
0.377114	0.343284	0.279602	0.242032	0.202191	0.196215	0.004975	0.288557	0.519403	0.765174	0.999005	0.00199	0.181095	0.486567	0.774129	0.99801	0.000995	0.237811	0.470647	0.689552	1	0.315423	0.029851	0.654726	0.00996	0.063745	0.005976	0.000995	0.160199	0.476617	0.913433	1	0.109453	0.115423	0.210945	0.406965	0.971144	0.004975	0.319403	0.518408	0.712438	0.99403	0.426866	0.384462	0.002985	0.241791	0.448756	0.683582	0.99403	0.373134
0.495192	0.235577	0.269231	0.236715	0.309179	0.130435	0.009615	0.240385	0.466346	0.673077	1	0.033654	0.211538	0.524038	0.783654	0.995192	0.004808	0.264423	0.519231	0.788462	0.980769	0.278846	0.009615	0.711538	0.009662	0.057971	0	0.004808	0.067308	0.168269	0.817308	1	0.841346	0.841346	0.841346	0.841346	0.846154	0.086538	0.375	0.557692	0.735577	0.956731	0.322115	0.47343	0.019231	0.336538	0.528846	0.735577	0.947115	0.278846
0.42562	0.376033	0.198347	0.244813	0.107884	0.161826	0.061983	0.31405	0.5	0.727273	1	0.008264	0.169421	0.512397	0.780992	0.987603	0.004132	0.173554	0.326446	0.743802	0.991736	0.68595	0.016529	0.297521	0.012448	0.095436	0.004149	0.004132	0.355372	0.557851	0.747934	1	0.18595	0.18595	0.190083	0.194215	0.789256	0.016529	0.119835	0.31405	0.669421	0.933884	0.326446	0.248963	0.012397	0.099174	0.318182	0.652893	0.975207	0.371901
0.223898	0.438515	0.337587	0.209059	0.134727	0.275261	0.00232	0.229698	0.447796	0.723898	0.99652	0.00464	0.191415	0.473318	0.728538	1	0.00116	0.295824	0.561485	0.766821	0.993039	0.387471	0.052204	0.560325	0.018583	0.085947	0.002323	0.00116	0.149652	0.389791	0.665893	1	0.315545	0.359629	0.431555	0.568445	0.901392	0.032483	0.286543	0.604408	0.803944	0.99768	0.675174	0.271777	0.00348	0.325986	0.554524	0.74942	0.9942	0.437355
0.230769	0.418803	0.350427	0.25	0.060345	0.327586	0.068376	0.316239	0.504274	0.666667	0.991453	0.017094	0.273504	0.470085	0.683761	1	0.008547	0.205128	0.401709	0.735043	0.965812	0.57265	0.076923	0.350427	0.034483	0.034483	0	0.008547	0.316239	0.461538	0.649573	1	0.478632	0.487179	0.504274	0.931624	0.957265	0.094017	0.17094	0.25641	0.74359	0.837607	0.564103	0.224138	0.025641	0.213675	0.435897	0.74359	0.965812	0.350427
0.273973	0.246575	0.479452	0.152778	0.236111	0.263889	0.027397	0.383562	0.534247	0.780822	0.917808	0.054795	0.30137	0.671233	0.767123	0.986301	0.013699	0.136986	0.328767	0.616438	1	0.534247	0.09589	0.369863	0.055556	0.083333	0	0.013699	0.30137	0.547945	0.767123	1	0.849315	0.849315	0.876712	0.90411	0.972603	0.041096	0.109589	0.205479	0.410959	0.657534	0.589041	0.361111	0.041096	0.164384	0.356164	0.657534	0.958904	0.30137
0.329596	0.329596	0.340807	0.208989	0.238202	0.226966	0.015695	0.262332	0.506726	0.786996	1	0.004484	0.2287	0.441704	0.699552	0.993274	0.002242	0.248879	0.517937	0.73991	0.997758	0.486547	0.197309	0.316143	0.07191	0.058427	0	0.002242	0.282511	0.482063	0.76009	1	0.015695	0.275785	0.428251	0.860987	0.995516	0.049327	0.197309	0.511211	0.717489	0.852018	0.535874	0.4	0.017937	0.248879	0.502242	0.713004	0.997758	0.349776
0.30597	0.373134	0.320896	0.233083	0.203008	0.285714	0.014925	0.231343	0.432836	0.708955	0.970149	0.022388	0.201493	0.58209	0.753731	1	0.007463	0.261194	0.485075	0.768657	0.992537	0.656716	0.022388	0.320896	0.015038	0.075188	0	0.007463	0.19403	0.634328	0.798507	1	0.149254	0.149254	0.149254	0.156716	0.164179	0.126866	0.298507	0.462687	0.544776	0.932836	0.432836	0.315789	0.029851	0.261194	0.485075	0.641791	0.992537	0.395522
0.418502	0.334802	0.246696	0.292035	0.252212	0.150442	0.026432	0.242291	0.462555	0.753304	1	0.008811	0.290749	0.511013	0.748899	0.973568	0.004405	0.176211	0.484581	0.731278	0.991189	0.110132	0	0.889868	0	0.053097	0	0.004405	0.356828	0.709251	0.911894	1	0	0	0	0	0	0.013216	0.242291	0.480176	0.722467	0.986784	0.374449	0.504425	0.013216	0.193833	0.45815	0.687225	0.982379	0.387665
0.314136	0.376963	0.308901	0.268421	0.231579	0.226316	0.010471	0.350785	0.565445	0.780105	1	0.015707	0.219895	0.471204	0.706806	0.968586	0.005236	0.136126	0.445026	0.675393	0.989529	0.586387	0.240838	0.172775	0.115789	0.042105	0	0.005236	0.225131	0.471204	0.743455	1	0.209424	0.439791	0.549738	0.790576	0.994764	0.020942	0.057592	0.308901	0.675393	0.942408	0.596859	0.421053	0.015707	0.17801	0.429319	0.664921	0.984293	0.455497
0.266667	0.405128	0.328205	0.190722	0.185567	0.273196	0.015385	0.282051	0.502564	0.697436	1	0.010256	0.215385	0.425641	0.779487	0.989744	0.005128	0.266667	0.528205	0.769231	0.994872	0.441026	0.179487	0.379487	0.072165	0.082474	0.010309	0.005128	0.297436	0.502564	0.805128	1	0.020513	0.358974	0.425641	0.876923	0.979487	0.041026	0.153846	0.538462	0.65641	0.958974	0.538462	0.402062	0.010256	0.261538	0.471795	0.717949	0.979487	0.420513
0.236686	0.461538	0.301775	0.190476	0.190476	0.214286	0.023669	0.284024	0.615385	0.745562	0.970414	0.017751	0.195266	0.443787	0.816568	0.988166	0.005917	0.260355	0.455621	0.698225	1	0.52071	0.16568	0.313609	0.071429	0.035714	0.011905	0.005917	0.207101	0.43787	0.840237	1	0.035503	0.071006	0.218935	0.585799	0.988166	0.272189	0.47929	0.556213	0.686391	0.863905	0.508876	0.404762	0.029586	0.183432	0.372781	0.639053	0.982249	0.420118
0.368263	0.338323	0.293413	0.297297	0.21021	0.189189	0.005988	0.254491	0.51497	0.739521	1	0.011976	0.323353	0.547904	0.784431	0.997006	0.002994	0.140719	0.368263	0.637725	0.976048	0.248503	0.149701	0.601796	0.045045	0.075075	0.003003	0.002994	0.176647	0.401198	0.643713	1	0.05988	0.185629	0.239521	0.287425	0.946108	0.008982	0.377246	0.571856	0.775449	0.973054	0.517964	0.444444	0.011976	0.194611	0.407186	0.691617	0.976048	0.38024
0.306542	0.37757	0.315888	0.213483	0.205993	0.220974	0.018692	0.259813	0.484112	0.723364	0.992523	0.003738	0.233645	0.502804	0.781308	0.998131	0.001869	0.242991	0.514019	0.715888	1	0.336449	0.142056	0.521495	0.058052	0.073034	0.001873	0.001869	0.229907	0.465421	0.708411	1	0.016822	0.401869	0.540187	0.669159	0.895327	0.005607	0.233645	0.51028	0.788785	0.975701	0.583178	0.385768	0.013084	0.237383	0.540187	0.760748	0.97757	0.409346
0.176471	0.411765	0.411765	0.19403	0.149254	0.253731	0.029412	0.338235	0.514706	0.779412	1	0.132353	0.323529	0.602941	0.75	0.985294	0.014706	0.117647	0.367647	0.705882	0.955882	0.602941	0.117647	0.279412	0.059701	0.059701	0	0.014706	0.382353	0.588235	0.794118	1	0.441176	0.455882	0.485294	0.720588	0.75	0.029412	0.073529	0.147059	0.220588	0.897059	0.558824	0.477612	0.044118	0.161765	0.441176	0.705882	0.955882	0.529412
0.221374	0.465649	0.312977	0.215385	0.130769	0.292308	0.045802	0.335878	0.51145	0.755725	1	0.022901	0.221374	0.450382	0.732824	0.961832	0.007634	0.19084	0.480916	0.671756	0.992366	0.473282	0.381679	0.145038	0.207692	0.023077	0.007692	0.007634	0.274809	0.572519	0.725191	1	0.183206	0.389313	0.557252	0.816794	0.992366	0.030534	0.053435	0.091603	0.129771	0.312977	0.473282	0.461538	0.030534	0.160305	0.427481	0.740458	0.992366	0.458015
0.265487	0.424779	0.309735	0.248521	0.153846	0.269231	0.017699	0.283186	0.477876	0.775811	0.99115	0.0059	0.256637	0.495575	0.734513	1	0.00295	0.185841	0.516224	0.731563	0.99705	0.545723	0.094395	0.359882	0.035503	0.106509	0.011834	0.00295	0.268437	0.492625	0.820059	1	0.056047	0.106195	0.327434	0.587021	0.740413	0.0059	0.185841	0.530973	0.681416	0.988201	0.548673	0.366864	0.011799	0.185841	0.498525	0.696165	0.970501	0.424779
0.342105	0.299342	0.358553	0.188119	0.247525	0.194719	0.006579	0.220395	0.480263	0.769737	0.993421	0.009868	0.226974	0.490132	0.746711	0.996711	0.003289	0.263158	0.519737	0.740132	1	0.401316	0.151316	0.447368	0.059406	0.105611	0.006601	0.003289	0.190789	0.473684	0.746711	1	0.029605	0.111842	0.210526	0.684211	0.871711	0.0625	0.325658	0.565789	0.736842	0.990132	0.575658	0.422442	0.023026	0.259868	0.444079	0.703947	0.986842	0.282895
0.26477	0.36105	0.374179	0.184211	0.175439	0.29386	0.004376	0.242888	0.568928	0.798687	0.995624	0.006565	0.258206	0.507659	0.768053	0.997812	0.002188	0.234136	0.428884	0.684902	1	0.437637	0.09628	0.466083	0.04386	0.070175	0.004386	0.002188	0.262582	0.597374	0.809628	1	0.111597	0.463895	0.649891	0.719912	0.805252	0.006565	0.135667	0.407002	0.619256	0.956236	0.676149	0.245614	0.008753	0.26477	0.45733	0.695842	0.989059	0.367615
0.342193	0.388704	0.269103	0.24	0.153333	0.236667	0.009967	0.259136	0.41196	0.700997	0.996678	0.006645	0.209302	0.488372	0.724252	1	0.003322	0.249169	0.584718	0.79402	0.993355	0.574751	0.129568	0.295681	0.08	0.046667	0.013333	0.003322	0.209302	0.548173	0.774086	1	0.043189	0.212625	0.671096	0.79402	0.9701	0.059801	0.245847	0.318937	0.392027	0.900332	0.388704	0.32	0.026578	0.219269	0.584718	0.790698	0.9701	0.438538
0.08	0.5	0.42	0.081633	0.081633	0.326531	0.04	0.04	0.42	0.66	0.9	0.06	0.36	0.52	0.64	0.94	0.02	0.16	0.3	0.74	1	0.6	0.12	0.28	0.081633	0.040816	0	0.02	0.42	0.58	0.82	1	0.7	0.7	0.74	0.76	0.96	0.04	0.08	0.16	0.22	0.3	0.64	0.326531	0.08	0.22	0.38	0.74	0.96	0.52
0.146789	0.477064	0.376147	0.117241	0.089655	0.381609	0.004587	0.204128	0.486239	0.692661	0.993119	0.009174	0.256881	0.502294	0.770642	1	0.002294	0.238532	0.511468	0.740826	0.997706	0.190367	0.011468	0.798165	0.004598	0.068966	0.004598	0.002294	0.176606	0.479358	0.669725	1	0.029817	0.029817	0.981651	0.983945	0.988532	0.025229	0.263761	0.516055	0.75	0.963303	0.768349	0.229885	0.025229	0.268349	0.529817	0.756881	0.990826	0.454128
0.314516	0.370968	0.314516	0.260163	0.186992	0.227642	0.016129	0.314516	0.548387	0.790323	1	0.024194	0.145161	0.467742	0.733871	0.991935	0.008065	0.201613	0.459677	0.669355	0.943548	0.532258	0.016129	0.451613	0.01626	0.065041	0	0.008065	0.129032	0.467742	0.846774	1	0.895161	0.895161	0.895161	0.895161	0.903226	0.145161	0.25	0.491935	0.701613	0.814516	0.5	0.422764	0.032258	0.290323	0.524194	0.758065	0.927419	0.395161
0.235996	0.40955	0.354454	0.198529	0.134191	0.294118	0.002755	0.247934	0.499541	0.720845	0.999082	0.007346	0.258953	0.497704	0.735537	0.997245	0.000918	0.238751	0.500459	0.801653	1	0.315886	0.072544	0.61157	0.025735	0.073529	0.001838	0.000918	0.152433	0.459137	0.775023	1	0.092746	0.179063	0.746556	0.852158	0.99449	0.028466	0.270891	0.502296	0.675849	0.955923	0.616162	0.336397	0.001837	0.259871	0.503214	0.782369	0.998163	0.440771
0.237705	0.459016	0.303279	0.247934	0.123967	0.280992	0.032787	0.114754	0.393443	0.622951	1	0.016393	0.221311	0.54918	0.795082	0.991803	0.008197	0.319672	0.516393	0.729508	0.959016	0.45082	0.057377	0.491803	0.041322	0.140496	0.008264	0.008197	0.114754	0.532787	0.778689	1	0.032787	0.032787	0.590164	0.606557	0.770492	0.131148	0.319672	0.467213	0.680328	0.918033	0.532787	0.363636	0.02459	0.344262	0.557377	0.811475	0.967213	0.434426
0.356455	0.314066	0.32948	0.202703	0.245174	0.19112	0.003854	0.219653	0.445087	0.687861	0.988439	0.009634	0.302505	0.593449	0.809249	0.996146	0.001927	0.240848	0.466281	0.728324	1	0.364162	0.323699	0.312139	0.121622	0.052124	0.001931	0.001927	0.219653	0.43738	0.655106	1	0.013487	0.188825	0.524085	0.755299	0.942197	0.040462	0.391137	0.552987	0.805395	0.992293	0.612717	0.320463	0.011561	0.292871	0.55106	0.7842	0.992293	0.319846
0.114943	0.609195	0.275862	0.104651	0.104651	0.348837	0.034483	0.229885	0.471264	0.689655	0.850575	0.022989	0.252874	0.551724	0.793103	1	0.011494	0.183908	0.390805	0.643678	0.942529	0.896552	0.103448	0	0.093023	0	0	0.011494	0.264368	0.54023	0.758621	1	0.034483	0.045977	0.068966	0.298851	0.83908	0	0	0	0	0	0.873563	0.162791	0.045977	0.275862	0.528736	0.758621	0.977011	0.54023
0.313333	0.406667	0.28	0.26087	0.123746	0.26087	0.016667	0.26	0.536667	0.756667	1	0.006667	0.253333	0.5	0.74	0.996667	0.003333	0.183333	0.44	0.72	0.976667	0.383333	0.156667	0.46	0.056856	0.103679	0.003344	0.003333	0.313333	0.556667	0.75	1	0.163333	0.21	0.786667	0.836667	0.896667	0.023333	0.15	0.44	0.653333	0.98	0.59	0.374582	0.01	0.253333	0.496667	0.753333	0.976667	0.413333
0.167638	0.396501	0.43586	0.116788	0.132847	0.359124	0.002915	0.258017	0.549563	0.817784	1	0.01312	0.294461	0.502915	0.718659	0.998542	0.001458	0.212828	0.472303	0.740525	0.997085	0.246356	0.058309	0.695335	0.018978	0.068613	0.010219	0.001458	0.30758	0.56414	0.728863	1	0.002915	0.09621	0.120991	0.536443	0.74344	0.016035	0.271137	0.482507	0.790087	0.994169	0.823615	0.183942	0.002915	0.236152	0.470845	0.706997	0.989796	0.355685
0.39517	0.320527	0.284303	0.242857	0.238462	0.181319	0.003293	0.267838	0.498353	0.735456	0.998902	0.004391	0.241493	0.511526	0.768386	0.997805	0.001098	0.221734	0.477497	0.745335	1	0.298573	0.004391	0.697036	0.003297	0.078022	0.001099	0.001098	0.17124	0.413831	0.83315	1	0.005488	0.005488	0.905598	0.906696	0.907794	0.040615	0.291987	0.514819	0.731065	0.994512	0.441273	0.485714	0.002195	0.222832	0.478595	0.760703	0.994512	0.336992
0.29078	0.390071	0.319149	0.207143	0.25	0.257143	0.014184	0.177305	0.524823	0.758865	0.964539	0.035461	0.248227	0.432624	0.680851	1	0.007092	0.297872	0.503546	0.787234	0.992908	0.432624	0.297872	0.269504	0.078571	0.035714	0.007143	0.007092	0.219858	0.553191	0.730496	1	0.035461	0.134752	0.531915	0.695035	0.992908	0.29078	0.347518	0.41844	0.751773	0.822695	0.489362	0.485714	0.035461	0.283688	0.404255	0.659574	0.985816	0.404255
0.295374	0.3879	0.316726	0.225	0.221429	0.253571	0.049822	0.241993	0.523132	0.75089	1	0.010676	0.231317	0.469751	0.729537	0.992883	0.003559	0.24911	0.498221	0.733096	0.985765	0.572954	0.320285	0.106762	0.132143	0.053571	0.003571	0.003559	0.298932	0.558719	0.772242	1	0.007117	0.224199	0.395018	0.604982	0.893238	0.039146	0.149466	0.516014	0.836299	0.946619	0.637011	0.414286	0.007117	0.213523	0.480427	0.736655	0.985765	0.430605
[truncated: 435 more rows]
[truncated: 83 more columns]
