# Supplementary material for: Prediction of RNA‐Binding Proteins by Voting Systems
Source: Hindawi journal article supplement (doi:10.1155/2011/506205), 2011-01-01
Supplement: f1 [file 506205.f1.zip › trainSet10.csv]

v1	v2	v3	v4	v5	v6	v7	v8	v9	v10	v11	v12	v13	v14	v15	v16	v17	v18	v19	v20	v21	v22	v23	v24	v25	v26	v27	v28	v29	v30	v31	v32	v33	v34	v35	v36	v37	v38	v39	v40	v41	v42	v43	v44	v45	v46	v47	v48	v49	v50
0.264484	0.551637	0.183879	0.270202	0.113636	0.176768	0.005038	0.234257	0.382872	0.584383	0.989924	0.025189	0.221662	0.596977	0.790932	1	0.002519	0.345088	0.493703	0.702771	0.992443	0.715365	0.105793	0.178841	0.050505	0.060606	0.005051	0.002519	0.186398	0.493703	0.690176	1	0.219144	0.360202	0.405542	0.700252	0.851385	0.050378	0.425693	0.7733	0.828715	0.974811	0.624685	0.277778	0.007557	0.410579	0.652393	0.813602	0.992443	0.506297
0.448598	0.364486	0.186916	0.276995	0.150235	0.14554	0.014019	0.200935	0.457944	0.635514	1	0.009346	0.317757	0.556075	0.803738	0.995327	0.004673	0.242991	0.565421	0.813084	0.985981	0.593458	0.018692	0.38785	0.018779	0.037559	0	0.004673	0.341121	0.691589	0.841121	1	0.373832	0.373832	0.378505	0.873832	0.878505	0.065421	0.154206	0.266355	0.537383	0.668224	0.294393	0.356808	0.079439	0.247664	0.640187	0.836449	0.985981	0.406542
0.32199	0.324607	0.353403	0.230971	0.217848	0.246719	0.005236	0.227749	0.497382	0.769634	1	0.007853	0.251309	0.47644	0.759162	0.997382	0.002618	0.23822	0.502618	0.727749	0.986911	0.463351	0.209424	0.327225	0.052493	0.068241	0.015748	0.002618	0.157068	0.45288	0.685864	1	0.044503	0.235602	0.518325	0.717277	0.879581	0.041885	0.356021	0.494764	0.850785	0.992147	0.565445	0.388451	0.013089	0.256545	0.484293	0.730366	0.986911	0.324607
0.30084	0.431933	0.267227	0.208754	0.171717	0.239057	0.003361	0.193277	0.411765	0.69916	0.991597	0.005042	0.315966	0.584874	0.828571	0.998319	0.001681	0.231933	0.445378	0.721008	1	0.531092	0.2	0.268908	0.089226	0.055556	0.001684	0.001681	0.242017	0.559664	0.709244	1	0.05042	0.215126	0.388235	0.630252	0.986555	0.028571	0.321008	0.52437	0.852101	0.963025	0.563025	0.350168	0.018487	0.305882	0.584874	0.764706	0.993277	0.411765
0.329293	0.345455	0.325253	0.216599	0.234818	0.220648	0.008081	0.20404	0.484848	0.753535	1	0.00404	0.29697	0.557576	0.771717	0.99596	0.00202	0.226263	0.458586	0.69697	0.99798	0.531313	0.171717	0.29697	0.076923	0.040486	0	0.00202	0.220202	0.50303	0.745455	1	0.107071	0.311111	0.470707	0.670707	0.830303	0.074747	0.260606	0.620202	0.872727	0.987879	0.507071	0.287449	0.022222	0.333333	0.561616	0.713131	0.993939	0.371717
0.361702	0.276596	0.361702	0.258065	0.258065	0.16129	0.042553	0.287234	0.510638	0.723404	0.989362	0.021277	0.180851	0.37234	0.776596	1	0.010638	0.244681	0.531915	0.691489	0.968085	0.351064	0.340426	0.308511	0.129032	0.043011	0	0.010638	0.085106	0.361702	0.680851	1	0.106383	0.414894	0.734043	0.87234	0.978723	0.191489	0.255319	0.329787	0.542553	0.62766	0.574468	0.344086	0.031915	0.234043	0.446809	0.638298	0.968085	0.287234
0.401961	0.284314	0.313725	0.267327	0.306931	0.138614	0.039216	0.333333	0.54902	0.715686	0.980392	0.019608	0.186275	0.401961	0.794118	1	0.009804	0.205882	0.431373	0.656863	0.931373	0.411765	0.303922	0.284314	0.079208	0.039604	0	0.009804	0.127451	0.588235	0.794118	1	0.078431	0.362745	0.656863	0.852941	0.931373	0.156863	0.215686	0.284314	0.480392	0.558824	0.529412	0.29703	0.029412	0.205882	0.401961	0.568627	0.931373	0.323529
0.344086	0.333333	0.322581	0.282609	0.206522	0.304348	0.032258	0.290323	0.526882	0.698925	1	0.021505	0.215054	0.451613	0.83871	0.989247	0.010753	0.204301	0.483871	0.655914	0.946237	0.333333	0.365591	0.301075	0.130435	0.043478	0	0.010753	0.11828	0.419355	0.784946	1	0.053763	0.365591	0.698925	0.860215	0.956989	0.150538	0.215054	0.430108	0.505376	0.580645	0.526882	0.326087	0.053763	0.215054	0.397849	0.602151	0.946237	0.354839
0.304348	0.347826	0.347826	0.208791	0.208791	0.21978	0.043478	0.326087	0.586957	0.771739	0.978261	0.021739	0.184783	0.423913	0.630435	1	0.01087	0.25	0.532609	0.728261	0.98913	0.347826	0.347826	0.304348	0.10989	0.043956	0	0.01087	0.130435	0.597826	0.804348	1	0.054348	0.369565	0.695652	0.891304	0.978261	0.152174	0.217391	0.434783	0.51087	0.586957	0.576087	0.307692	0.054348	0.206522	0.413043	0.597826	0.967391	0.369565
0.303213	0.371486	0.325301	0.209256	0.225352	0.247485	0.006024	0.196787	0.518072	0.742972	0.997992	0.008032	0.289157	0.51004	0.738956	1	0.002008	0.238956	0.459839	0.757028	0.995984	0.403614	0.216867	0.379518	0.110664	0.066398	0.006036	0.002008	0.285141	0.552209	0.773092	1	0.044177	0.299197	0.526104	0.809237	0.985944	0.11245	0.226908	0.415663	0.646586	0.963855	0.644578	0.37827	0.01004	0.311245	0.512048	0.763052	0.987952	0.399598
0.360424	0.289753	0.349823	0.187943	0.248227	0.258865	0.007067	0.226148	0.477032	0.738516	1	0.014134	0.261484	0.526502	0.773852	0.996466	0.003534	0.233216	0.491166	0.724382	0.978799	0.282686	0.091873	0.625442	0.031915	0.08156	0.003546	0.003534	0.137809	0.44523	0.773852	1	0.010601	0.038869	0.081272	0.109541	0.176678	0.144876	0.360424	0.565371	0.763251	0.978799	0.515901	0.382979	0.010601	0.257951	0.4947	0.731449	0.968198	0.272085
0.485327	0.24605	0.268623	0.210407	0.223982	0.153846	0.004515	0.27991	0.474041	0.659142	0.997743	0.018059	0.227991	0.553047	0.812641	1	0.002257	0.187359	0.514673	0.808126	0.988713	0.638826	0.158014	0.20316	0.074661	0.061086	0.002262	0.002257	0.295711	0.476298	0.668172	1	0.013544	0.137698	0.512415	0.873589	0.977427	0.065463	0.17833	0.670429	0.767494	0.943567	0.525959	0.38009	0.011287	0.320542	0.512415	0.690745	0.975169	0.21219
0.31441	0.366812	0.318777	0.236842	0.22807	0.232456	0.0131	0.257642	0.49345	0.733624	0.995633	0.004367	0.209607	0.406114	0.71179	0.982533	0.034934	0.28821	0.576419	0.772926	1	0.349345	0.017467	0.633188	0.008772	0.078947	0	0.004367	0.087336	0.454148	0.855895	1	0.41048	0.41048	0.414847	0.419214	0.423581	0.091703	0.28821	0.532751	0.703057	0.991266	0.49345	0.473684	0.017467	0.222707	0.471616	0.694323	0.9869	0.406114
0.365678	0.401168	0.233154	0.269663	0.186067	0.174831	0.002246	0.252022	0.498203	0.749775	0.999102	0.000898	0.234052	0.464061	0.72956	1	0.000449	0.28257	0.570979	0.789757	0.990117	0.649146	0.119946	0.230907	0.054382	0.059775	0.006742	0.000449	0.240791	0.486074	0.730907	1	0.021114	0.375562	0.59434	0.709793	0.969901	0.002695	0.224618	0.466307	0.761456	0.993261	0.367475	0.343371	0.001348	0.268643	0.592992	0.784367	0.990117	0.427673
0.27451	0.502451	0.223039	0.238037	0.11411	0.213497	0.002451	0.259804	0.48652	0.794118	1	0.003676	0.203431	0.457108	0.675245	0.998775	0.001225	0.340686	0.604167	0.792892	0.997549	0.682598	0.171569	0.145833	0.077301	0.040491	0.003681	0.001225	0.234069	0.498775	0.762255	1	0.04902	0.468137	0.632353	0.785539	0.991422	0.082108	0.214461	0.269608	0.405637	0.944853	0.457108	0.33865	0.01348	0.22549	0.534314	0.713235	0.992647	0.471814
0.280236	0.415929	0.303835	0.195266	0.174556	0.278107	0.061947	0.297935	0.530973	0.79646	1	0.0059	0.168142	0.457227	0.687316	0.99705	0.00295	0.271386	0.504425	0.716814	0.967552	0.389381	0.162242	0.448378	0.079882	0.10355	0.008876	0.00295	0.174041	0.389381	0.743363	1	0.017699	0.235988	0.386431	0.542773	0.761062	0.014749	0.351032	0.648968	0.820059	0.970501	0.681416	0.319527	0.00885	0.241888	0.516224	0.719764	0.99705	0.442478
0.285996	0.491124	0.22288	0.225296	0.142292	0.195652	0.005917	0.211045	0.380671	0.571992	0.948718	0.003945	0.343195	0.678501	0.82643	1	0.001972	0.157791	0.386588	0.581854	0.968442	0.717949	0.072978	0.209073	0.029644	0.033597	0.005929	0.001972	0.317554	0.621302	0.820513	1	0.005917	0.289941	0.325444	0.378698	0.591716	0.017751	0.151874	0.262327	0.4714	0.66075	0.329389	0.3083	0.00789	0.149901	0.343195	0.518738	0.936884	0.506903
0.389247	0.384946	0.225806	0.25	0.200431	0.176724	0.006452	0.219355	0.498925	0.744086	1	0.004301	0.28172	0.56129	0.767742	0.995699	0.002151	0.23871	0.43871	0.660215	0.997849	0.677419	0.094624	0.227957	0.036638	0.040948	0.006466	0.002151	0.27957	0.595699	0.804301	1	0.283871	0.322581	0.436559	0.834409	0.926882	0.032258	0.126882	0.329032	0.486022	0.802151	0.408602	0.37931	0.012903	0.24086	0.443011	0.724731	0.989247	0.380645
0.332046	0.476834	0.19112	0.257253	0.145068	0.170213	0.011583	0.222008	0.434363	0.658301	0.986486	0.003861	0.279923	0.602317	0.851351	1	0.001931	0.189189	0.444015	0.619691	0.978764	0.716216	0.073359	0.210425	0.038685	0.034816	0	0.001931	0.305019	0.635135	0.820463	1	0.007722	0.316602	0.353282	0.472973	0.623552	0.046332	0.148649	0.266409	0.494208	0.677606	0.328185	0.313346	0.007722	0.262548	0.438224	0.61583	0.957529	0.5
0.371901	0.438017	0.190083	0.274834	0.134106	0.15894	0.014876	0.249587	0.47438	0.707438	1	0.003306	0.22314	0.552066	0.801653	0.998347	0.001653	0.271074	0.442975	0.680992	0.993388	0.766942	0.049587	0.183471	0.019868	0.033113	0.003311	0.001653	0.284298	0.616529	0.808264	1	0.216529	0.300826	0.358678	0.408264	0.547107	0.008264	0.173554	0.266116	0.461157	0.606612	0.385124	0.357616	0.008264	0.264463	0.471074	0.704132	0.960331	0.446281
0.330827	0.463659	0.205514	0.272271	0.150565	0.146801	0.003759	0.238095	0.449875	0.695489	1	0.002506	0.209273	0.482456	0.815789	0.998747	0.001253	0.390977	0.571429	0.724311	0.997494	0.661654	0.114035	0.224311	0.046424	0.048934	0.003764	0.001253	0.180451	0.360902	0.778195	1	0.005013	0.47619	0.617794	0.736842	0.830827	0.017544	0.446115	0.591479	0.726817	0.870927	0.52381	0.33877	0.005013	0.274436	0.536341	0.754386	0.997494	0.469925
0.289662	0.450358	0.25998	0.242828	0.148566	0.240779	0.004094	0.185261	0.455476	0.763562	0.998976	0.002047	0.27738	0.524053	0.74002	0.997953	0.001024	0.254862	0.451382	0.743091	1	0.576254	0.107472	0.316274	0.04918	0.071721	0.004098	0.001024	0.323439	0.576254	0.787103	1	0.037871	0.174002	0.30911	0.433982	0.995906	0.047083	0.209826	0.418628	0.735926	0.993859	0.426817	0.432377	0.012282	0.283521	0.510747	0.77175	0.995906	0.456499
0.243816	0.498233	0.257951	0.216312	0.131206	0.262411	0.007067	0.212014	0.342756	0.650177	0.975265	0.010601	0.289753	0.54417	0.756184	1	0.003534	0.226148	0.508834	0.763251	0.992933	0.798587	0.120141	0.081272	0.056738	0.021277	0	0.003534	0.332155	0.55477	0.759717	1	0.120141	0.219081	0.279152	0.611307	0.992933	0.162544	0.176678	0.293286	0.314488	0.904594	0.572438	0.297872	0.021201	0.318021	0.55477	0.713781	0.992933	0.44523
0.236842	0.52193	0.241228	0.211454	0.123348	0.229075	0.013158	0.298246	0.447368	0.75	0.995614	0.008772	0.197368	0.548246	0.745614	0.991228	0.004386	0.232456	0.451754	0.719298	1	0.79386	0.096491	0.109649	0.044053	0.026432	0	0.004386	0.25	0.574561	0.77193	1	0.149123	0.258772	0.285088	0.342105	0.460526	0.201754	0.223684	0.377193	0.403509	0.97807	0.570175	0.325991	0.017544	0.315789	0.596491	0.741228	0.986842	0.486842
0.396117	0.378641	0.225243	0.287938	0.169261	0.182879	0.01165	0.314563	0.537864	0.776699	1	0.003883	0.24466	0.473786	0.700971	0.990291	0.001942	0.194175	0.421359	0.753398	0.992233	0.737864	0.102913	0.159223	0.038911	0.027237	0.007782	0.001942	0.357282	0.541748	0.726214	1	0.052427	0.159223	0.223301	0.291262	0.968932	0.009709	0.124272	0.174757	0.848544	0.91068	0.221359	0.206226	0.005825	0.11068	0.219417	0.718447	0.968932	0.392233
0.37037	0.34321	0.28642	0.24505	0.200495	0.207921	0.012346	0.259259	0.45679	0.745679	0.995062	0.017284	0.2	0.488889	0.730864	1	0.002469	0.296296	0.535802	0.77037	0.97037	0.592593	0.14321	0.264198	0.061881	0.061881	0.002475	0.002469	0.2	0.365432	0.68642	1	0.004938	0.219753	0.590123	0.859259	0.940741	0.032099	0.412346	0.548148	0.738272	0.851852	0.444444	0.351485	0.004938	0.28642	0.550617	0.740741	0.97037	0.375309
0.322422	0.407529	0.270049	0.257377	0.170492	0.221311	0.011457	0.314239	0.548282	0.765957	1	0.003273	0.170213	0.384615	0.710311	0.998363	0.001637	0.348609	0.563011	0.769231	0.99509	0.662848	0.10802	0.229133	0.054098	0.054098	0.001639	0.001637	0.165303	0.358429	0.728314	1	0.188216	0.320786	0.512275	0.695581	0.93617	0.369885	0.479542	0.636661	0.818331	0.99509	0.422259	0.383607	0.022913	0.292962	0.538462	0.752864	0.99509	0.428805
0.364469	0.302198	0.333333	0.218349	0.269725	0.19633	0.005495	0.25641	0.489011	0.760073	0.996337	0.007326	0.203297	0.446886	0.736264	0.998168	0.001832	0.287546	0.529304	0.747253	1	0.342491	0.087912	0.569597	0.034862	0.104587	0.005505	0.001832	0.254579	0.470696	0.727106	1	0.043956	0.197802	0.239927	0.267399	0.377289	0.003663	0.362637	0.564103	0.800366	0.994505	0.569597	0.418349	0.003663	0.260073	0.483516	0.738095	0.998168	0.309524
0.348404	0.356383	0.295213	0.216	0.208	0.248	0.015957	0.263298	0.468085	0.739362	1	0.005319	0.218085	0.531915	0.755319	0.99734	0.00266	0.231383	0.489362	0.742021	0.986702	0.324468	0.093085	0.582447	0.037333	0.117333	0.005333	0.00266	0.220745	0.5	0.728723	1	0.053191	0.114362	0.191489	0.260638	0.335106	0.013298	0.37234	0.571809	0.779255	0.992021	0.569149	0.448	0.007979	0.24734	0.449468	0.699468	0.992021	0.385638
0.329208	0.361386	0.309406	0.2134	0.188586	0.26799	0.00495	0.264851	0.490099	0.777228	0.997525	0.007426	0.215347	0.509901	0.727723	0.987624	0.002475	0.25	0.487624	0.720297	1	0.371287	0.084158	0.544554	0.034739	0.114144	0.004963	0.002475	0.222772	0.425743	0.735149	1	0.05198	0.108911	0.195545	0.287129	0.35396	0.014851	0.393564	0.574257	0.772277	0.985149	0.534653	0.436725	0.009901	0.247525	0.435644	0.685644	0.980198	0.376238
0.331742	0.272076	0.396181	0.141148	0.26555	0.246411	0.004773	0.243437	0.472554	0.761337	0.99284	0.009547	0.188544	0.455847	0.725537	0.988067	0.002387	0.286396	0.544153	0.747017	1	0.348449	0.088305	0.563246	0.038278	0.105263	0.004785	0.002387	0.188544	0.477327	0.656325	1	0.004773	0.062053	0.138425	0.224344	0.293556	0.019093	0.381862	0.577566	0.799523	0.995227	0.601432	0.37799	0.00716	0.257757	0.48926	0.73031	0.997613	0.26969
0.337766	0.329787	0.332447	0.205333	0.237333	0.24	0.029255	0.281915	0.518617	0.781915	0.989362	0.013298	0.207447	0.444149	0.702128	1	0.00266	0.242021	0.494681	0.742021	0.99734	0.281915	0.101064	0.617021	0.042667	0.117333	0.005333	0.00266	0.183511	0.329787	0.632979	1	0.045213	0.109043	0.196809	0.244681	0.367021	0.007979	0.417553	0.617021	0.81383	0.99734	0.606383	0.421333	0.005319	0.25	0.470745	0.736702	0.99734	0.353723
0.307125	0.371007	0.321867	0.236453	0.197044	0.268473	0.012285	0.262899	0.461916	0.746929	0.997543	0.009828	0.211302	0.520885	0.744472	1	0.002457	0.260442	0.5086	0.734644	0.985258	0.331695	0.088452	0.579853	0.034483	0.1133	0.004926	0.002457	0.19656	0.366093	0.692875	1	0.063882	0.12285	0.206388	0.297297	0.363636	0.019656	0.410319	0.597052	0.786241	0.990172	0.550369	0.438424	0.007371	0.257985	0.454545	0.690418	0.987715	0.385749
0.381443	0.313402	0.305155	0.239669	0.247934	0.181818	0.008247	0.23299	0.51134	0.754639	0.997938	0.004124	0.265979	0.492784	0.750515	0.985567	0.002062	0.253608	0.496907	0.740206	1	0.397938	0.179381	0.42268	0.070248	0.103306	0.004132	0.002062	0.290722	0.519588	0.773196	1	0.096907	0.239175	0.501031	0.748454	0.925773	0.006186	0.191753	0.453608	0.676289	0.995876	0.529897	0.409091	0.006186	0.270103	0.474227	0.707216	0.991753	0.346392
0.362245	0.306122	0.331633	0.202046	0.263427	0.209719	0.010204	0.247449	0.528061	0.752551	0.994898	0.005102	0.229592	0.454082	0.714286	1	0.002551	0.267857	0.497449	0.755102	0.987245	0.387755	0.186224	0.42602	0.076726	0.081841	0	0.002551	0.280612	0.553571	0.77551	1	0.09949	0.262755	0.566327	0.798469	0.933673	0.007653	0.206633	0.466837	0.719388	0.987245	0.563776	0.393862	0.007653	0.27551	0.482143	0.729592	0.987245	0.27551
0.388158	0.282895	0.328947	0.208791	0.261538	0.18022	0.004386	0.256579	0.508772	0.780702	0.997807	0.017544	0.22807	0.482456	0.717105	1	0.002193	0.258772	0.486842	0.734649	0.995614	0.385965	0.184211	0.429825	0.076923	0.09011	0.002198	0.002193	0.298246	0.513158	0.758772	1	0.100877	0.254386	0.526316	0.774123	0.949561	0.006579	0.199561	0.440789	0.701754	0.989035	0.541667	0.408791	0.006579	0.267544	0.482456	0.717105	0.995614	0.285088
0.30303	0.400932	0.296037	0.261682	0.186916	0.247664	0.006993	0.268065	0.515152	0.780886	0.993007	0.004662	0.205128	0.459207	0.731935	0.997669	0.002331	0.272727	0.51049	0.724942	1	0.386946	0.090909	0.522145	0.035047	0.114486	0.002336	0.002331	0.228438	0.454545	0.685315	1	0.048951	0.104895	0.181818	0.223776	0.344988	0.013986	0.389277	0.594406	0.804196	0.993007	0.599068	0.411215	0.009324	0.261072	0.477855	0.729604	0.995338	0.435897
0.389423	0.269231	0.341346	0.175904	0.296386	0.192771	0.009615	0.206731	0.502404	0.778846	0.997596	0.004808	0.293269	0.46875	0.728365	1	0.002404	0.242788	0.509615	0.730769	0.995192	0.408654	0.204327	0.387019	0.06988	0.079518	0.007229	0.002404	0.286058	0.53125	0.783654	1	0.086538	0.25	0.483173	0.764423	0.951923	0.007212	0.194712	0.439904	0.692308	0.978365	0.543269	0.4	0.007212	0.264423	0.478365	0.704327	0.995192	0.288462
0.366133	0.313501	0.320366	0.227064	0.263761	0.188073	0.006865	0.240275	0.498856	0.759725	0.990847	0.009153	0.228833	0.487414	0.734554	1	0.002288	0.267735	0.496568	0.73913	0.995423	0.402746	0.189931	0.407323	0.073394	0.082569	0.004587	0.002288	0.295195	0.517162	0.773455	1	0.100686	0.249428	0.489703	0.743707	0.935927	0.009153	0.196796	0.439359	0.681922	0.981693	0.544622	0.417431	0.009153	0.265446	0.487414	0.702517	0.995423	0.340961
0.37469	0.26799	0.35732	0.18408	0.261194	0.208955	0.004963	0.253102	0.533499	0.784119	1	0.009926	0.176179	0.387097	0.674938	0.997519	0.002481	0.317618	0.516129	0.761787	0.995037	0.352357	0.094293	0.55335	0.039801	0.109453	0.004975	0.002481	0.203474	0.531017	0.746898	1	0.004963	0.064516	0.148883	0.233251	0.305211	0.019851	0.364764	0.573201	0.791563	0.992556	0.593052	0.393035	0.007444	0.243176	0.466501	0.707196	0.980149	0.255583
0.353952	0.358534	0.287514	0.248853	0.209862	0.207569	0.002291	0.271478	0.500573	0.735395	0.998855	0.005727	0.213058	0.429553	0.722795	0.996564	0.001145	0.280641	0.533792	0.778923	1	0.568156	0.106529	0.325315	0.040138	0.108945	0.008028	0.001145	0.186712	0.457045	0.739977	1	0.17984	0.616266	0.73425	0.799542	0.981672	0.005727	0.30126	0.467354	0.680412	0.973654	0.568156	0.383028	0.004582	0.183276	0.453608	0.737686	0.981672	0.363116
0.416366	0.318893	0.264741	0.254217	0.203614	0.173494	0.002407	0.180505	0.391095	0.688327	0.998797	0.004813	0.293622	0.56438	0.808664	1	0.001203	0.375451	0.545126	0.76775	0.990373	0.529483	0.105897	0.364621	0.040964	0.091566	0.004819	0.001203	0.302046	0.531889	0.819495	1	0.173285	0.583634	0.706378	0.772563	0.967509	0.006017	0.152828	0.351384	0.625752	0.959085	0.392298	0.378313	0.00361	0.393502	0.626955	0.79302	0.98556	0.314079
0.332898	0.402089	0.265013	0.235294	0.181699	0.188235	0.003916	0.263708	0.505222	0.738903	1	0.002611	0.18799	0.443864	0.766319	0.998695	0.001305	0.355091	0.537859	0.741514	0.993473	0.556136	0.120104	0.32376	0.047059	0.099346	0.005229	0.001305	0.193211	0.455614	0.793734	1	0.011749	0.519582	0.655352	0.727154	0.949086	0.009138	0.266319	0.468668	0.680157	0.98564	0.506527	0.420915	0.009138	0.253264	0.544386	0.75718	0.993473	0.385117
0.316312	0.419858	0.26383	0.235795	0.176136	0.203125	0.002837	0.2	0.492199	0.741844	0.998582	0.004255	0.249645	0.476596	0.780142	1	0.001418	0.286525	0.539007	0.73617	0.982979	0.607092	0.15461	0.238298	0.066761	0.066761	0.007102	0.001418	0.228369	0.446809	0.780142	1	0.038298	0.324823	0.631206	0.714894	0.98156	0.008511	0.248227	0.519149	0.726241	0.950355	0.507801	0.440341	0.009929	0.273759	0.52766	0.734752	0.984397	0.41844
0.300373	0.419776	0.279851	0.214953	0.181308	0.246729	0.005597	0.20709	0.43097	0.76306	0.996269	0.009328	0.31903	0.576493	0.742537	1	0.001866	0.231343	0.466418	0.73694	0.981343	0.632463	0.160448	0.20709	0.059813	0.052336	0	0.001866	0.276119	0.567164	0.727612	1	0.016791	0.171642	0.335821	0.848881	0.981343	0.035448	0.218284	0.438433	0.779851	0.955224	0.626866	0.261682	0.009328	0.333955	0.552239	0.723881	0.981343	0.440299
0.281893	0.465021	0.253086	0.226804	0.152577	0.249485	0.00823	0.240741	0.419753	0.769547	0.995885	0.004115	0.271605	0.549383	0.746914	1	0.002058	0.211934	0.471193	0.734568	0.979424	0.633745	0.158436	0.207819	0.061856	0.065979	0	0.002058	0.251029	0.567901	0.736626	1	0.004115	0.179012	0.366255	0.465021	0.979424	0.13786	0.290123	0.487654	0.790123	0.950617	0.580247	0.247423	0.006173	0.403292	0.611111	0.771605	0.979424	0.465021
0.36831	0.307746	0.323944	0.212121	0.230444	0.206483	0.001408	0.234507	0.45	0.734507	0.999296	0.002113	0.273944	0.529577	0.748592	0.997183	0.000704	0.247183	0.505634	0.764789	1	0.538732	0.35493	0.106338	0.11346	0.03876	0.007752	0.000704	0.249296	0.502817	0.716901	1	0.009155	0.232394	0.467606	0.740141	0.933099	0.002113	0.25	0.673239	0.95493	0.998592	0.585915	0.283298	0.002113	0.25493	0.494366	0.761972	0.997887	0.347183
0.342395	0.326231	0.331374	0.210294	0.2125	0.236765	0.00147	0.271859	0.502572	0.755327	1	0.002939	0.229243	0.481999	0.722998	0.997796	0.000735	0.23953	0.509184	0.762675	0.995591	0.533431	0.366642	0.099927	0.118382	0.031618	0.008088	0.000735	0.237325	0.459956	0.710507	1	0.008817	0.262307	0.506245	0.76047	0.927259	0.002939	0.316679	0.578986	0.954445	0.994857	0.609111	0.308824	0.002204	0.261572	0.515062	0.747979	0.995591	0.3446
0.353949	0.314456	0.331595	0.206562	0.236391	0.203579	0.00149	0.256334	0.468703	0.746647	0.999255	0.002235	0.237705	0.52459	0.742921	0.996274	0.000745	0.246647	0.496274	0.751118	1	0.505216	0.380775	0.114009	0.127517	0.038031	0.003729	0.000745	0.256334	0.504471	0.722057	1	0.009687	0.228018	0.4769	0.739195	0.92921	0.002235	0.283905	0.513413	0.951565	0.999255	0.612519	0.299776	0.002235	0.253353	0.495529	0.76155	0.997765	0.337556
0.291262	0.395071	0.313667	0.227952	0.162182	0.247384	0.001494	0.26587	0.494399	0.752054	0.992532	0.002987	0.231516	0.474235	0.734877	0.999253	0.000747	0.246453	0.525019	0.754294	1	0.533234	0.394324	0.072442	0.130045	0.028401	0.005979	0.000747	0.256161	0.480956	0.716953	1	0.00224	0.228529	0.485437	0.722928	0.932786	0.003734	0.373413	0.93652	0.970127	0.994025	0.619119	0.300448	0.00224	0.245706	0.49888	0.755041	0.998506	0.436146
0.332308	0.317692	0.35	0.212471	0.237875	0.220169	0.001538	0.27	0.506154	0.75	1	0.007692	0.245385	0.503846	0.756154	0.999231	0.000769	0.224615	0.49	0.743077	0.996923	0.489231	0.393077	0.117692	0.126251	0.038491	0.009238	0.000769	0.256154	0.478462	0.717692	1	0.009231	0.209231	0.473846	0.738462	0.925385	0.002308	0.314615	0.571538	0.952308	0.996923	0.620769	0.292533	0.002308	0.251538	0.500769	0.745385	0.997692	0.333077
0.286401	0.412088	0.301511	0.234364	0.172509	0.245361	0.001374	0.261676	0.476648	0.728709	0.991071	0.002747	0.233516	0.524038	0.761676	0.999313	0.000687	0.255495	0.503434	0.75206	1	0.570055	0.348901	0.081044	0.119588	0.024742	0.006873	0.000687	0.252747	0.485577	0.71978	1	0.008929	0.247253	0.510989	0.762363	0.995192	0.041896	0.181319	0.399038	0.93544	0.989011	0.60783	0.290034	0.00206	0.265797	0.527473	0.765797	0.998626	0.441621
0.30465	0.367106	0.328244	0.221528	0.210417	0.239583	0.004164	0.278279	0.51839	0.740458	0.99653	0.001388	0.235947	0.496183	0.745316	0.999306	0.000694	0.240805	0.477446	0.754337	1	0.528105	0.376128	0.095767	0.117361	0.034028	0.004861	0.000694	0.258848	0.509368	0.725191	1	0.002082	0.226232	0.475364	0.754337	0.936155	0.00347	0.279667	0.528105	0.957668	0.998612	0.598196	0.313889	0.002082	0.240805	0.490632	0.761971	0.997918	0.392783
0.305753	0.37037	0.323877	0.235804	0.180599	0.240536	0.00394	0.251379	0.503546	0.762805	0.998424	0.001576	0.263987	0.492514	0.718676	0.994484	0.000788	0.233255	0.506698	0.768322	1	0.483846	0.431836	0.084318	0.136435	0.021293	0.003943	0.000788	0.245863	0.465721	0.711584	1	0.010244	0.222222	0.494878	0.739165	0.925138	0.002364	0.371946	0.929866	0.970843	0.998424	0.639874	0.301262	0.002364	0.256107	0.513002	0.745469	0.999212	0.399527
0.333333	0.303571	0.363095	0.191045	0.256716	0.235821	0.008929	0.264881	0.5	0.776786	0.991071	0.005952	0.241071	0.485119	0.744048	1	0.002976	0.232143	0.494048	0.705357	0.988095	0.458333	0.145833	0.395833	0.071642	0.065672	0	0.002976	0.270833	0.592262	0.782738	1	0.008929	0.235119	0.357143	0.6875	0.934524	0.044643	0.151786	0.473214	0.636905	0.991071	0.565476	0.346269	0.005952	0.247024	0.479167	0.705357	0.988095	0.318452
0.399123	0.312865	0.288012	0.240117	0.199122	0.207906	0.004386	0.182749	0.394737	0.767544	0.998538	0.002924	0.288012	0.523392	0.755848	0.989766	0.001462	0.352339	0.542398	0.716374	1	0.577485	0.109649	0.312865	0.054173	0.083455	0.001464	0.001462	0.194444	0.428363	0.760234	1	0.00731	0.410819	0.498538	0.679825	0.973684	0.019006	0.374269	0.568713	0.748538	0.998538	0.409357	0.330893	0.008772	0.394737	0.559942	0.72076	0.994152	0.340643
0.316327	0.459184	0.22449	0.267894	0.161554	0.198364	0.006122	0.312245	0.559184	0.730612	0.985714	0.004082	0.202041	0.391837	0.757143	0.997959	0.002041	0.285714	0.546939	0.744898	1	0.706122	0.114286	0.179592	0.047035	0.063395	0.002045	0.002041	0.216327	0.426531	0.787755	1	0.016327	0.318367	0.497959	0.702041	0.785714	0.057143	0.444898	0.616327	0.734694	0.938776	0.440816	0.368098	0.010204	0.255102	0.502041	0.734694	0.993878	0.453061
0.289931	0.465278	0.244792	0.21913	0.154783	0.24	0.005208	0.239583	0.522569	0.690972	1	0.003472	0.237847	0.475694	0.776042	0.996528	0.001736	0.286458	0.503472	0.722222	0.994792	0.642361	0.090278	0.267361	0.046957	0.085217	0.001739	0.001736	0.220486	0.510417	0.805556	1	0.128472	0.407986	0.479167	0.654514	0.723958	0.026042	0.256944	0.505208	0.670139	0.96875	0.449653	0.389565	0.017361	0.256944	0.529514	0.774306	0.994792	0.472222
0.289308	0.396226	0.314465	0.214173	0.162205	0.248819	0.004717	0.238994	0.449686	0.756289	1	0.003145	0.215409	0.492138	0.746855	0.993711	0.001572	0.306604	0.528302	0.743711	0.996855	0.319182	0.006289	0.674528	0	0.119685	0.006299	0.001572	0.083333	0.371069	0.68239	1	0.528302	0.528302	0.949686	0.951258	0.95283	0.012579	0.289308	0.556604	0.759434	0.996855	0.512579	0.381102	0.006289	0.306604	0.561321	0.764151	0.996855	0.404088
0.32	0.429565	0.250435	0.252613	0.155052	0.236934	0.005217	0.170435	0.415652	0.695652	0.984348	0.003478	0.332174	0.582609	0.786087	1	0.001739	0.198261	0.429565	0.726957	0.998261	0.732174	0.109565	0.158261	0.041812	0.04878	0.003484	0.001739	0.349565	0.58087	0.8	1	0.062609	0.18087	0.246957	0.328696	0.956522	0.073043	0.163478	0.34087	0.426087	0.733913	0.438261	0.327526	0.024348	0.276522	0.549565	0.812174	0.991304	0.445217
0.310592	0.362657	0.32675	0.239209	0.197842	0.253597	0.005386	0.247756	0.477558	0.696589	1	0.003591	0.238779	0.506284	0.775583	0.996409	0.001795	0.245961	0.51526	0.736086	0.992819	0.576302	0.143627	0.280072	0.052158	0.084532	0.008993	0.001795	0.235189	0.536804	0.815081	1	0.059246	0.346499	0.527828	0.64991	0.969479	0.005386	0.251346	0.40395	0.671454	0.958707	0.48474	0.442446	0.014363	0.314183	0.524237	0.743268	0.992819	0.348294
0.289593	0.420814	0.289593	0.213636	0.159091	0.227273	0.022624	0.20362	0.542986	0.80543	0.995475	0.00905	0.208145	0.470588	0.687783	1	0.004525	0.303167	0.488688	0.764706	0.986425	0.647059	0.180995	0.171946	0.081818	0.054545	0.018182	0.004525	0.221719	0.538462	0.782805	1	0.167421	0.447964	0.651584	0.764706	0.941176	0.022624	0.117647	0.348416	0.402715	0.977376	0.533937	0.263636	0.099548	0.348416	0.547511	0.742081	0.972851	0.434389
0.314961	0.370079	0.314961	0.261905	0.222222	0.206349	0.015748	0.228346	0.456693	0.732283	1	0.007874	0.173228	0.488189	0.740157	0.992126	0.031496	0.267717	0.527559	0.80315	0.984252	0.393701	0.322835	0.283465	0.111111	0.063492	0.015873	0.007874	0.370079	0.559055	0.748031	1	0.023622	0.322835	0.511811	0.700787	0.952756	0.07874	0.141732	0.212598	0.779528	0.858268	0.472441	0.47619	0.031496	0.283465	0.566929	0.740157	0.968504	0.409449
0.328244	0.343511	0.328244	0.269231	0.192308	0.223077	0.015267	0.175573	0.412214	0.732824	0.977099	0.007634	0.282443	0.458015	0.709924	1	0.022901	0.251908	0.519084	0.80916	0.992366	0.412214	0.374046	0.21374	0.115385	0.038462	0.007692	0.007634	0.160305	0.305344	0.59542	1	0.030534	0.328244	0.465649	0.587786	0.70229	0.229008	0.78626	0.839695	0.908397	0.961832	0.450382	0.507692	0.022901	0.244275	0.541985	0.78626	0.969466	0.374046
0.315789	0.421053	0.263158	0.265152	0.159091	0.272727	0.022556	0.210526	0.466165	0.691729	0.977444	0.015038	0.263158	0.548872	0.736842	1	0.007519	0.165414	0.488722	0.81203	0.969925	0.488722	0.285714	0.225564	0.075758	0.045455	0	0.007519	0.203008	0.421053	0.601504	1	0.030075	0.150376	0.473684	0.646617	0.721805	0.24812	0.774436	0.834586	0.902256	0.962406	0.406015	0.575758	0.030075	0.255639	0.541353	0.789474	0.969925	0.451128
0.302752	0.426606	0.270642	0.225806	0.179724	0.207373	0.009174	0.169725	0.449541	0.747706	0.958716	0.018349	0.238532	0.444954	0.711009	0.995413	0.004587	0.334862	0.56422	0.793578	1	0.582569	0.256881	0.16055	0.078341	0.032258	0.004608	0.004587	0.233945	0.440367	0.738532	1	0.266055	0.472477	0.573394	0.83945	0.940367	0.12844	0.16055	0.201835	0.637615	0.889908	0.46789	0.35023	0.142202	0.330275	0.573394	0.770642	0.990826	0.444954
0.353712	0.371179	0.275109	0.219298	0.197368	0.201754	0.0131	0.174672	0.471616	0.768559	1	0.008734	0.218341	0.414847	0.68559	0.978166	0.004367	0.393013	0.580786	0.772926	0.9869	0.572052	0.270742	0.157205	0.083333	0.030702	0.004386	0.004367	0.231441	0.436681	0.759825	1	0.253275	0.449782	0.554585	0.812227	0.991266	0.117904	0.152838	0.19214	0.606987	0.847162	0.454148	0.359649	0.135371	0.318777	0.558952	0.746725	0.9869	0.393013
0.345992	0.362869	0.291139	0.279661	0.15678	0.237288	0.008439	0.227848	0.472574	0.772152	1	0.012658	0.21097	0.438819	0.666667	0.966245	0.004219	0.333333	0.582278	0.776371	0.987342	0.64135	0.236287	0.122363	0.088983	0.04661	0.004237	0.004219	0.206751	0.459916	0.71308	1	0.016878	0.57384	0.64557	0.886076	0.991561	0.135021	0.160338	0.261603	0.443038	0.974684	0.451477	0.389831	0.016878	0.388186	0.582278	0.767932	0.987342	0.42616
0.28363	0.458671	0.257699	0.23539	0.167208	0.211039	0.003241	0.333874	0.549433	0.764992	0.983793	0.004862	0.19611	0.439222	0.748784	1	0.001621	0.28363	0.487844	0.71799	0.996759	0.675851	0.111831	0.212318	0.053571	0.056818	0.001623	0.001621	0.212318	0.453809	0.753647	1	0.037277	0.371151	0.539708	0.692058	0.952998	0.004862	0.23987	0.555916	0.779579	0.983793	0.452188	0.36039	0.008104	0.215559	0.491086	0.740681	0.990276	0.442464
0.313316	0.441253	0.245431	0.244444	0.154248	0.215686	0.003916	0.201044	0.385117	0.651436	1	0.002611	0.308094	0.552219	0.805483	0.997389	0.001305	0.259791	0.549608	0.711488	0.989556	0.672324	0.122715	0.204961	0.060131	0.049673	0.007843	0.001305	0.234987	0.47389	0.780679	1	0.020888	0.437337	0.579634	0.677546	0.964752	0.018277	0.244125	0.422977	0.685379	0.920366	0.458225	0.360784	0.007833	0.362924	0.584856	0.800261	0.993473	0.432115
0.29904	0.460905	0.240055	0.233516	0.144231	0.206044	0.004115	0.201646	0.530864	0.759945	1	0.002743	0.231824	0.41701	0.689986	0.994513	0.001372	0.29904	0.603567	0.805213	0.998628	0.714678	0.106996	0.178326	0.049451	0.052198	0.002747	0.001372	0.224966	0.441701	0.659808	1	0.009602	0.283951	0.709191	0.840878	0.997257	0.082305	0.364883	0.670782	0.875171	0.972565	0.499314	0.326923	0.005487	0.286694	0.518519	0.716049	0.995885	0.45679
0.230352	0.574526	0.195122	0.192673	0.093623	0.217096	0.004065	0.275068	0.392954	0.659892	1	0.006775	0.257453	0.51897	0.789973	0.998645	0.001355	0.178862	0.501355	0.752033	0.99729	0.5271	0.071816	0.401084	0.033921	0.058345	0.006784	0.001355	0.228997	0.542005	0.764228	1	0.004065	0.163957	0.449864	0.674797	0.960705	0.009485	0.273713	0.375339	0.758808	0.99729	0.47832	0.306649	0.00542	0.254743	0.626016	0.817073	0.99729	0.50813
0.320495	0.352132	0.327373	0.199587	0.199587	0.251204	0.004127	0.275791	0.503439	0.748281	0.996561	0.001376	0.247593	0.5	0.746905	1	0.000688	0.227648	0.490371	0.755158	0.998624	0.536451	0.370702	0.092847	0.123882	0.033035	0.009635	0.000688	0.269601	0.502063	0.727648	1	0.002063	0.194635	0.428473	0.742779	0.935351	0.083906	0.457359	0.693948	0.957359	0.998624	0.600413	0.308328	0.001376	0.242091	0.482118	0.759285	0.997937	0.369326
0.316838	0.328522	0.354639	0.198074	0.229711	0.243466	0.004124	0.28866	0.514089	0.752577	0.996564	0.002062	0.241924	0.498282	0.743643	0.998625	0.000687	0.235739	0.487285	0.749828	1	0.54433	0.360137	0.095533	0.114168	0.037139	0.008253	0.000687	0.261856	0.498282	0.717526	1	0.002062	0.201375	0.457045	0.754639	0.936082	0.04055	0.335395	0.626117	0.958076	0.998625	0.591753	0.316369	0.001375	0.243299	0.490722	0.753952	0.997938	0.34433
0.362708	0.309068	0.328225	0.221228	0.257033	0.195652	0.007663	0.293742	0.53129	0.749681	0.994891	0.002554	0.219668	0.473819	0.729246	0.997446	0.001277	0.217114	0.44189	0.772669	1	0.47765	0.246488	0.275862	0.086957	0.066496	0.002558	0.001277	0.236271	0.537676	0.753512	1	0.005109	0.251596	0.505747	0.772669	0.971903	0.066411	0.283525	0.402299	0.727969	0.996169	0.538953	0.375959	0.006386	0.215837	0.427842	0.722861	0.996169	0.357599
0.321637	0.340643	0.337719	0.204978	0.222548	0.238653	0.010234	0.290936	0.545322	0.783626	0.991228	0.002924	0.23538	0.482456	0.726608	1	0.001462	0.222222	0.473684	0.74269	0.998538	0.432749	0.241228	0.326023	0.098097	0.051245	0.001464	0.001462	0.214912	0.464912	0.697368	1	0.017544	0.24269	0.562865	0.80117	0.95614	0.089181	0.333333	0.495614	0.766082	0.99269	0.574561	0.38653	0.017544	0.23538	0.459064	0.711988	0.994152	0.342105
0.325991	0.348018	0.325991	0.230088	0.199115	0.238938	0.030837	0.246696	0.506608	0.69163	1	0.008811	0.198238	0.471366	0.740088	0.995595	0.004405	0.312775	0.53304	0.770925	0.991189	0.577093	0.229075	0.193833	0.075221	0.048673	0.013274	0.004405	0.176211	0.471366	0.69163	1	0.105727	0.365639	0.453744	0.784141	0.995595	0.264317	0.30837	0.546256	0.92511	0.977974	0.471366	0.415929	0.017621	0.361233	0.568282	0.806167	0.995595	0.321586
0.306159	0.519928	0.173913	0.255898	0.098004	0.179673	0.005435	0.213768	0.568841	0.894928	1	0.003623	0.32971	0.512681	0.679348	0.998188	0.001812	0.188406	0.356884	0.67029	0.869565	0.748188	0.067029	0.184783	0.029038	0.043557	0	0.001812	0.311594	0.498188	0.684783	1	0.012681	0.134058	0.197464	0.230072	0.873188	0.028986	0.257246	0.802536	0.858696	0.994565	0.375	0.290381	0.007246	0.175725	0.396739	0.686594	0.994565	0.54529
0.320594	0.464968	0.214437	0.240426	0.129787	0.191489	0.006369	0.212314	0.422505	0.842887	0.995754	0.004246	0.29087	0.537155	0.70276	1	0.002123	0.22293	0.443737	0.660297	0.95966	0.685775	0.080679	0.233546	0.040426	0.057447	0.002128	0.002123	0.265393	0.503185	0.675159	1	0.014862	0.150743	0.193206	0.271762	0.859873	0.029724	0.301486	0.749469	0.834395	0.980892	0.467091	0.331915	0.008493	0.216561	0.477707	0.622081	0.95966	0.469214
0.318182	0.465909	0.215909	0.275862	0.137931	0.218391	0.034091	0.272727	0.420455	0.636364	0.988636	0.022727	0.238636	0.579545	0.772727	1	0.011364	0.102273	0.397727	0.784091	0.931818	0.579545	0.090909	0.329545	0.045977	0.045977	0	0.011364	0.352273	0.647727	0.795455	1	0.534091	0.545455	0.863636	0.886364	0.909091	0.022727	0.090909	0.170455	0.397727	0.488636	0.636364	0.252874	0.045455	0.352273	0.522727	0.795455	0.965909	0.5
0.38069	0.364138	0.255172	0.243094	0.185083	0.189227	0.030345	0.284138	0.543448	0.771034	0.994483	0.002759	0.143448	0.415172	0.691034	1	0.001379	0.311724	0.53931	0.764138	0.997241	0.495172	0.092414	0.412414	0.044199	0.058011	0.002762	0.001379	0.147586	0.391724	0.662069	1	0.131034	0.313103	0.515862	0.842759	0.90069	0.044138	0.306207	0.630345	0.787586	0.986207	0.438621	0.403315	0.008276	0.315862	0.533793	0.743448	0.986207	0.361379
0.327273	0.327273	0.345455	0.247706	0.247706	0.201835	0.045455	0.2	0.472727	0.672727	0.981818	0.018182	0.272727	0.509091	0.790909	1	0.009091	0.209091	0.536364	0.745455	0.990909	0.454545	0.454545	0.090909	0.174312	0.045872	0.009174	0.009091	0.345455	0.563636	0.818182	1	0.081818	0.181818	0.418182	0.718182	0.981818	0.036364	0.045455	0.072727	0.509091	0.536364	0.490909	0.477064	0.018182	0.272727	0.536364	0.736364	0.990909	0.372727
0.246753	0.493506	0.25974	0.235294	0.117647	0.24183	0.025974	0.292208	0.577922	0.733766	0.974026	0.012987	0.201299	0.415584	0.701299	1	0.006494	0.227273	0.558442	0.772727	0.987013	0.681818	0.266234	0.051948	0.084967	0.006536	0.019608	0.006494	0.168831	0.337662	0.707792	1	0.376623	0.493506	0.623377	0.772727	0.987013	0.38961	0.396104	0.409091	0.642857	0.655844	0.428571	0.352941	0.123377	0.357143	0.538961	0.753247	0.987013	0.474026
0.365915	0.330827	0.303258	0.240903	0.237139	0.195734	0.005013	0.255639	0.491228	0.75188	1	0.002506	0.230576	0.525063	0.738095	0.996241	0.001253	0.250627	0.47619	0.761905	0.998747	0.5401	0.359649	0.100251	0.121706	0.033877	0.003764	0.001253	0.24812	0.507519	0.760652	1	0.048872	0.266917	0.493734	0.735589	0.969925	0.008772	0.076441	0.441103	0.849624	0.993734	0.473684	0.398996	0.003759	0.236842	0.487469	0.736842	0.994987	0.373434
0.337017	0.359116	0.303867	0.266667	0.194444	0.2	0.01105	0.259669	0.497238	0.756906	1	0.033149	0.20442	0.469613	0.745856	0.977901	0.005525	0.265193	0.464088	0.690608	0.98895	0.486188	0.425414	0.088398	0.138889	0.05	0.005556	0.005525	0.281768	0.502762	0.762431	1	0.016575	0.18232	0.375691	0.679558	0.895028	0.524862	0.58011	0.61326	0.961326	0.98895	0.508287	0.366667	0.016575	0.20442	0.425414	0.690608	0.98895	0.392265
0.34589	0.400685	0.253425	0.254296	0.164948	0.185567	0.013699	0.25	0.417808	0.712329	0.993151	0.006849	0.273973	0.571918	0.777397	0.996575	0.003425	0.208904	0.523973	0.763699	1	0.59589	0.325342	0.078767	0.140893	0.024055	0.003436	0.003425	0.236301	0.462329	0.722603	1	0.034247	0.369863	0.530822	0.80137	0.986301	0.174658	0.188356	0.208904	0.732877	0.760274	0.489726	0.343643	0.010274	0.202055	0.486301	0.756849	0.989726	0.44863
0.283784	0.418919	0.297297	0.273973	0.219178	0.205479	0.027027	0.148649	0.472973	0.662162	0.945946	0.054054	0.297297	0.513514	0.756757	1	0.013514	0.202703	0.459459	0.702703	0.986486	0.540541	0.418919	0.040541	0.136986	0	0.027397	0.013514	0.337838	0.581081	0.810811	1	0.027027	0.108108	0.27027	0.662162	0.891892	0.418919	0.418919	0.418919	0.432432	0.445946	0.391892	0.410959	0.054054	0.202703	0.391892	0.567568	0.905405	0.405405
0.444444	0.197531	0.358025	0.225	0.3125	0.125	0.074074	0.296296	0.54321	0.765432	1	0.061728	0.197531	0.45679	0.790123	0.938272	0.012346	0.222222	0.395062	0.62963	0.950617	0.259259	0.320988	0.419753	0.1125	0.0375	0.0125	0.012346	0.185185	0.345679	0.481481	1	0.024691	0.08642	0.246914	0.358025	0.518519	0.530864	0.617284	0.728395	0.851852	0.962963	0.407407	0.425	0.024691	0.222222	0.395062	0.54321	0.938272	0.185185
0.392405	0.265823	0.341772	0.217949	0.230769	0.166667	0.075949	0.21519	0.556962	0.759494	1	0.063291	0.35443	0.468354	0.734177	0.974684	0.012658	0.164557	0.379747	0.594937	0.936709	0.240506	0.329114	0.43038	0.115385	0.038462	0.012821	0.012658	0.126582	0.341772	0.481013	1	0.025316	0.088608	0.253165	0.367089	0.531646	0.544304	0.632911	0.746835	0.860759	0.974684	0.417722	0.410256	0.025316	0.227848	0.405063	0.556962	0.936709	0.35443
0.452381	0.25	0.297619	0.277108	0.240964	0.13253	0.071429	0.309524	0.595238	0.761905	1	0.059524	0.321429	0.511905	0.72619	0.964286	0.011905	0.154762	0.27381	0.5	0.892857	0.380952	0.309524	0.309524	0.120482	0.072289	0	0.011905	0.309524	0.47619	0.904762	1	0.02381	0.083333	0.238095	0.345238	0.5	0.52381	0.583333	0.666667	0.809524	0.892857	0.369048	0.433735	0.02381	0.166667	0.392857	0.559524	0.892857	0.321429
0.385542	0.289157	0.325301	0.231707	0.256098	0.146341	0.072289	0.313253	0.554217	0.759036	0.927711	0.060241	0.349398	0.638554	0.915663	1	0.012048	0.144578	0.277108	0.518072	0.843373	0.385542	0.313253	0.301205	0.121951	0.04878	0	0.012048	0.313253	0.481928	0.903614	1	0.024096	0.084337	0.240964	0.349398	0.506024	0.53012	0.590361	0.662651	0.771084	0.855422	0.349398	0.414634	0.024096	0.168675	0.385542	0.518072	0.915663	0.301205
0.295775	0.394366	0.309859	0.257143	0.142857	0.285714	0.084507	0.239437	0.492958	0.704225	0.929577	0.070423	0.295775	0.577465	0.859155	0.985915	0.014085	0.169014	0.323944	0.56338	1	0.43662	0.366197	0.197183	0.142857	0.028571	0	0.014085	0.239437	0.549296	0.887324	1	0.028169	0.098592	0.28169	0.408451	0.591549	0.619718	0.647887	0.704225	0.746479	0.802817	0.366197	0.371429	0.028169	0.169014	0.352113	0.521127	0.71831	0.394366
0.283228	0.476266	0.240506	0.242472	0.156894	0.206022	0.011076	0.193038	0.495253	0.727848	0.992089	0.003165	0.330696	0.525316	0.762658	1	0.001582	0.227848	0.447785	0.71519	0.988924	0.738924	0.053797	0.207278	0.034865	0.031696	0	0.001582	0.343354	0.528481	0.757911	1	0.026899	0.06962	0.099684	0.175633	0.563291	0.045886	0.231013	0.292722	0.935127	0.992089	0.664557	0.278922	0.025316	0.335443	0.599684	0.775316	0.988924	0.493671
0.316804	0.429752	0.253444	0.248619	0.162983	0.19337	0.019284	0.236915	0.506887	0.790634	1	0.00551	0.300275	0.482094	0.707989	0.991736	0.002755	0.179063	0.584022	0.741047	0.99449	0.68595	0.088154	0.225895	0.038674	0.060773	0	0.002755	0.294766	0.584022	0.774105	1	0.022039	0.099174	0.143251	0.374656	0.435262	0.055096	0.184573	0.482094	0.636364	0.99449	0.504132	0.425414	0.019284	0.311295	0.526171	0.719008	0.99449	0.410468
0.406433	0.368421	0.225146	0.31085	0.14956	0.187683	0.011696	0.25731	0.549708	0.774854	1	0.005848	0.216374	0.461988	0.736842	0.997076	0.002924	0.263158	0.491228	0.701754	0.97076	0.584795	0.154971	0.260234	0.064516	0.070381	0	0.002924	0.192982	0.385965	0.74269	1	0.105263	0.184211	0.5	0.614035	0.979532	0.049708	0.476608	0.681287	0.868421	0.935673	0.418129	0.357771	0.023392	0.25731	0.5	0.74269	0.98538	0.397661
0.39528	0.312684	0.292035	0.239645	0.224852	0.204142	0.014749	0.315634	0.569322	0.787611	1	0.0059	0.176991	0.427729	0.687316	0.99115	0.00295	0.224189	0.471976	0.728614	0.985251	0.622419	0.144543	0.233038	0.053254	0.059172	0	0.00295	0.188791	0.380531	0.758112	1	0.085546	0.156342	0.412979	0.539823	0.784661	0.303835	0.560472	0.710914	0.849558	0.982301	0.427729	0.420118	0.011799	0.238938	0.480826	0.666667	0.985251	0.365782
0.338677	0.478958	0.182365	0.261044	0.126506	0.160643	0.014028	0.250501	0.533066	0.767535	1	0.006012	0.298597	0.507014	0.751503	0.993988	0.002004	0.182365	0.388778	0.673347	0.985972	0.795591	0.06012	0.144289	0.024096	0.052209	0	0.002004	0.304609	0.503006	0.769539	1	0.136273	0.188377	0.222445	0.272545	0.663327	0.160321	0.250501	0.58517	0.733467	0.985972	0.478958	0.305221	0.016032	0.336673	0.462926	0.699399	0.98998	0.41483
0.32526	0.404844	0.269896	0.253472	0.170139	0.21875	0.013841	0.245675	0.49827	0.799308	0.99308	0.00692	0.249135	0.515571	0.712803	0.99654	0.00346	0.231834	0.439446	0.723183	1	0.709343	0.155709	0.134948	0.090278	0.055556	0.006944	0.00346	0.33564	0.553633	0.740484	1	0.089965	0.217993	0.283737	0.854671	0.989619	0.017301	0.183391	0.311419	0.401384	0.979239	0.588235	0.319444	0.024221	0.342561	0.567474	0.726644	0.989619	0.370242
0.262009	0.406114	0.331878	0.179825	0.188596	0.25	0.0131	0.248908	0.432314	0.733624	0.973799	0.017467	0.310044	0.580786	0.755459	0.991266	0.004367	0.218341	0.449782	0.71179	1	0.716157	0.148472	0.135371	0.087719	0.035088	0	0.004367	0.257642	0.598253	0.777293	1	0.039301	0.19214	0.336245	0.406114	0.947598	0.078603	0.262009	0.296943	0.449782	0.991266	0.611354	0.324561	0.021834	0.292576	0.628821	0.79476	0.9869	0.401747
0.355362	0.397756	0.246883	0.267166	0.168539	0.179775	0.013716	0.278055	0.586035	0.811721	1	0.002494	0.225686	0.498753	0.766833	0.993766	0.001247	0.23192	0.405237	0.620948	0.997506	0.490025	0.117207	0.392768	0.052434	0.082397	0.002497	0.001247	0.238155	0.567332	0.812968	1	0.125935	0.286783	0.413965	0.509975	0.845387	0.03616	0.256858	0.517456	0.682045	0.997506	0.4202	0.337079	0.004988	0.216958	0.395262	0.584788	0.976309	0.413965
0.388383	0.369021	0.242597	0.287343	0.191562	0.173318	0.004556	0.323462	0.595672	0.816629	0.998861	0.002278	0.224374	0.473804	0.722096	0.994305	0.001139	0.214123	0.411162	0.646925	1	0.501139	0.120729	0.378132	0.051311	0.085519	0.003421	0.001139	0.214123	0.550114	0.790433	1	0.045558	0.258542	0.41344	0.657175	0.867882	0.059226	0.266515	0.472665	0.675399	0.98861	0.403189	0.330673	0.004556	0.222096	0.414579	0.6082	0.980638	0.405467
0.417085	0.318593	0.264322	0.236419	0.208249	0.165996	0.005025	0.229146	0.521608	0.774874	0.998995	0.00201	0.245226	0.512563	0.767839	0.994975	0.001005	0.262312	0.464322	0.679397	1	0.517588	0.115578	0.366834	0.047284	0.091549	0.00503	0.001005	0.159799	0.527638	0.794975	1	0.123618	0.285427	0.390955	0.535678	0.868342	0.00402	0.294472	0.515578	0.676382	0.99598	0.415075	0.336016	0.003015	0.228141	0.40201	0.59598	0.980905	0.351759
0.385993	0.379479	0.234528	0.256117	0.150082	0.190865	0.008143	0.153094	0.436482	0.71987	1	0.003257	0.245928	0.454397	0.747557	0.996743	0.001629	0.387622	0.581433	0.781759	0.998371	0.478827	0.149837	0.371336	0.052202	0.081566	0.003263	0.001629	0.179153	0.399023	0.729642	1	0.271987	0.511401	0.666124	0.781759	0.996743	0.017915	0.307818	0.493485	0.752443	0.959283	0.467427	0.309951	0.013029	0.384365	0.568404	0.763844	0.998371	0.420195
0.351211	0.356401	0.292388	0.2513	0.187175	0.202773	0.00346	0.193772	0.456747	0.721453	1	0.019031	0.276817	0.49654	0.757785	0.991349	0.00173	0.283737	0.527682	0.766436	0.99827	0.432526	0.16782	0.399654	0.062392	0.07279	0.003466	0.00173	0.207612	0.423875	0.717993	1	0.00692	0.415225	0.645329	0.771626	0.99654	0.034602	0.259516	0.487889	0.749135	0.970588	0.531142	0.315425	0.00519	0.32526	0.508651	0.738754	0.99827	0.382353
0.397576	0.345455	0.25697	0.256068	0.199029	0.163835	0.006061	0.306667	0.58303	0.803636	1	0.002424	0.220606	0.464242	0.718788	0.995152	0.001212	0.21697	0.398788	0.667879	0.997576	0.446061	0.124848	0.429091	0.052184	0.076456	0.003641	0.001212	0.236364	0.569697	0.740606	1	0.048485	0.246061	0.395152	0.574545	0.97697	0.030303	0.253333	0.521212	0.755152	0.996364	0.390303	0.300971	0.042424	0.214545	0.379394	0.552727	0.996364	0.397576
0.345133	0.300885	0.353982	0.179601	0.241685	0.217295	0.004425	0.280973	0.539823	0.785398	0.995575	0.006637	0.227876	0.480088	0.761062	1	0.002212	0.232301	0.475664	0.696903	0.986726	0.35177	0.159292	0.488938	0.050998	0.086475	0.011086	0.002212	0.232301	0.480088	0.719027	1	0.097345	0.285398	0.460177	0.663717	0.774336	0.013274	0.221239	0.526549	0.814159	0.980088	0.550885	0.385809	0.00885	0.212389	0.422566	0.690265	0.986726	0.311947
0.419355	0.305806	0.274839	0.245478	0.22093	0.180879	0.003871	0.27871	0.597419	0.816774	1	0.005161	0.229677	0.447742	0.71871	0.99871	0.00129	0.223226	0.437419	0.636129	0.997419	0.454194	0.123871	0.421935	0.059432	0.080103	0.002584	0.00129	0.243871	0.534194	0.748387	1	0.046452	0.255484	0.384516	0.512258	0.975484	0.024516	0.263226	0.531613	0.774194	0.996129	0.414194	0.325581	0.005161	0.210323	0.389677	0.574194	0.996129	0.357419
0.414269	0.357883	0.227848	0.275346	0.15553	0.172811	0.009206	0.30725	0.591484	0.818182	0.998849	0.002301	0.216341	0.504028	0.735328	1	0.001151	0.207135	0.365938	0.555811	0.995397	0.513234	0.113924	0.372842	0.043779	0.085253	0.006912	0.001151	0.296893	0.573072	0.736479	1	0.04603	0.188723	0.322209	0.448792	0.904488	0.013809	0.247411	0.483314	0.777906	0.996548	0.410817	0.31106	0.011507	0.209436	0.38435	0.703107	0.995397	0.43038
0.344322	0.379121	0.276557	0.247706	0.19633	0.190826	0.005495	0.241758	0.525641	0.74359	0.994505	0.003663	0.161172	0.404762	0.750916	1	0.001832	0.347985	0.542125	0.749084	0.992674	0.532967	0.152015	0.315018	0.056881	0.06422	0.005505	0.001832	0.135531	0.283883	0.652015	1	0.227106	0.490842	0.64652	0.809524	0.915751	0.038462	0.423077	0.580586	0.785714	0.990842	0.492674	0.366972	0.010989	0.364469	0.542125	0.763736	0.990842	0.443223
0.32715	0.406408	0.266442	0.263514	0.163851	0.202703	0.003373	0.161889	0.467116	0.735245	1	0.006745	0.25801	0.526138	0.772344	0.998314	0.001686	0.317032	0.509275	0.715008	0.978078	0.50253	0.139966	0.357504	0.050676	0.077703	0.006757	0.001686	0.131535	0.376054	0.650927	1	0.183811	0.470489	0.630691	0.753794	0.887015	0.006745	0.350759	0.581788	0.789207	0.988196	0.505902	0.344595	0.006745	0.330523	0.51602	0.738617	0.966273	0.438449
0.374808	0.339478	0.285714	0.28	0.22	0.181538	0.00768	0.215054	0.485407	0.774194	1	0.004608	0.227343	0.479263	0.751152	0.996928	0.001536	0.325653	0.528418	0.731183	0.995392	0.548387	0.135177	0.316436	0.061538	0.061538	0.006154	0.001536	0.150538	0.302611	0.639017	1	0.004608	0.430108	0.606759	0.721966	0.887865	0.225806	0.454685	0.686636	0.855607	0.996928	0.466974	0.36	0.006144	0.371736	0.548387	0.766513	0.995392	0.390169
0.373434	0.358396	0.26817	0.233375	0.183187	0.196989	0.002506	0.250627	0.513784	0.753133	0.998747	0.007519	0.201754	0.451128	0.746867	1	0.001253	0.300752	0.502506	0.739348	0.997494	0.512531	0.116541	0.370927	0.046424	0.076537	0.003764	0.001253	0.129073	0.389724	0.710526	1	0.182957	0.365915	0.517544	0.672932	0.91604	0.053885	0.373434	0.615288	0.833333	0.991228	0.427318	0.311167	0.010025	0.313283	0.487469	0.720551	0.997494	0.383459
0.327273	0.42303	0.249697	0.275485	0.163835	0.206311	0.002424	0.241212	0.470303	0.779394	0.997576	0.006061	0.247273	0.558788	0.76	1	0.001212	0.270303	0.446061	0.681212	0.998788	0.486061	0.13697	0.37697	0.050971	0.080097	0.002427	0.001212	0.139394	0.408485	0.689697	1	0.007273	0.309091	0.473939	0.606061	0.718788	0.110303	0.344242	0.642424	0.835152	0.995152	0.442424	0.288835	0.006061	0.284848	0.493333	0.687273	0.996364	0.458182
0.324324	0.416462	0.259214	0.276753	0.153752	0.211562	0.003686	0.214988	0.476658	0.79484	0.997543	0.002457	0.234644	0.525799	0.740786	1	0.001229	0.302211	0.471744	0.712531	0.998771	0.492629	0.12285	0.384521	0.04797	0.092251	0.00369	0.001229	0.137592	0.41769	0.67199	1	0.009828	0.321867	0.471744	0.594595	0.716216	0.040541	0.361179	0.641278	0.821867	0.995086	0.44226	0.305043	0.0086	0.289926	0.488943	0.701474	0.996314	0.444717
0.359807	0.395909	0.244284	0.271084	0.174699	0.192771	0.00361	0.222623	0.498195	0.748496	0.997593	0.002407	0.219013	0.510229	0.754513	1	0.001203	0.300842	0.482551	0.728039	0.998797	0.503008	0.137184	0.359807	0.056627	0.071084	0.003614	0.001203	0.135981	0.357401	0.66065	1	0.00722	0.365824	0.524669	0.68231	0.930205	0.174489	0.399519	0.623345	0.847172	0.99639	0.45367	0.320482	0.006017	0.330927	0.534296	0.726835	0.99639	0.434416
0.290554	0.455852	0.253593	0.244604	0.14594	0.220966	0.002053	0.285421	0.514374	0.782341	0.997947	0.007187	0.198152	0.497947	0.762834	1	0.001027	0.287474	0.478439	0.701232	0.998973	0.559548	0.101643	0.338809	0.040082	0.068859	0.007194	0.001027	0.143737	0.428131	0.688912	1	0.00924	0.337782	0.467146	0.663244	0.932238	0.207392	0.396304	0.63963	0.799795	0.995893	0.434292	0.324769	0.007187	0.296715	0.488706	0.716632	0.99692	0.474333
0.376721	0.352941	0.270338	0.243108	0.174185	0.197995	0.005006	0.176471	0.434293	0.71214	1	0.010013	0.28035	0.555695	0.773467	0.996245	0.001252	0.345432	0.530663	0.743429	0.998748	0.515645	0.117647	0.366708	0.04386	0.068922	0.006266	0.001252	0.188986	0.379224	0.692115	1	0.005006	0.390488	0.555695	0.710889	0.997497	0.015019	0.366708	0.624531	0.841051	0.992491	0.428035	0.333333	0.003755	0.360451	0.543179	0.763454	0.997497	0.387985
0.346361	0.361186	0.292453	0.240216	0.180837	0.225371	0.004043	0.219677	0.508086	0.799191	0.998652	0.002695	0.226415	0.478437	0.718329	1	0.001348	0.304582	0.5	0.725067	0.997305	0.486523	0.122642	0.390836	0.044534	0.08502	0.004049	0.001348	0.136119	0.393531	0.690027	1	0.009434	0.339623	0.501348	0.656334	0.91779	0.030997	0.361186	0.59434	0.836927	0.995957	0.478437	0.334683	0.008086	0.281671	0.475741	0.722372	0.997305	0.374663
0.342488	0.386107	0.271405	0.257282	0.156958	0.229773	0.008078	0.169628	0.523425	0.780291	0.998384	0.003231	0.232633	0.450727	0.712439	1	0.001616	0.340872	0.536349	0.772213	0.983845	0.457189	0.138934	0.403877	0.045307	0.07767	0.006472	0.001616	0.122779	0.277868	0.642973	1	0.226171	0.439418	0.58643	0.754443	0.875606	0.017771	0.384491	0.621971	0.783522	0.993538	0.46042	0.326861	0.011309	0.337641	0.512116	0.739903	0.990307	0.42811
0.364217	0.36262	0.273163	0.2432	0.1792	0.2016	0.01278	0.180511	0.460064	0.785942	0.996805	0.003195	0.238019	0.461661	0.693291	0.998403	0.001597	0.367412	0.565495	0.755591	1	0.5623	0.123003	0.314696	0.0448	0.0832	0.0064	0.001597	0.167732	0.322684	0.672524	1	0.28754	0.536741	0.65655	0.803514	0.884984	0.031949	0.397764	0.578275	0.779553	0.996805	0.448882	0.3072	0.022364	0.391374	0.552716	0.761981	0.995208	0.42492
0.424556	0.318047	0.257396	0.266667	0.182222	0.174815	0.004438	0.16716	0.525148	0.77071	1	0.002959	0.247041	0.461538	0.744083	0.992604	0.001479	0.307692	0.498521	0.720414	0.997041	0.507396	0.130178	0.362426	0.042963	0.084444	0.004444	0.001479	0.150888	0.52071	0.761834	1	0.122781	0.329882	0.470414	0.678994	0.997041	0.094675	0.279586	0.498521	0.775148	0.926036	0.442308	0.331852	0.079882	0.273669	0.451183	0.701183	0.997041	0.356509
0.363484	0.353434	0.283082	0.278523	0.209732	0.191275	0.0067	0.281407	0.561139	0.777219	1	0.00335	0.18258	0.450586	0.720268	0.99665	0.001675	0.283082	0.470687	0.703518	0.9866	0.467337	0.142379	0.390285	0.055369	0.075503	0.005034	0.001675	0.20268	0.561139	0.772194	1	0.0067	0.288107	0.440536	0.631491	0.931323	0.033501	0.266332	0.497487	0.785595	0.917923	0.472362	0.33557	0.011725	0.229481	0.440536	0.676717	0.9866	0.370184
0.344023	0.393586	0.262391	0.272993	0.178102	0.179562	0.004373	0.290087	0.559767	0.778426	1	0.002915	0.193878	0.514577	0.760933	0.997085	0.001458	0.244898	0.443149	0.712828	0.995627	0.460641	0.144315	0.395044	0.046715	0.105109	0.005839	0.001458	0.186589	0.529155	0.798834	1	0.144315	0.319242	0.46793	0.607872	0.717201	0.016035	0.266764	0.48688	0.758017	0.947522	0.48105	0.347445	0.016035	0.239067	0.450437	0.666181	0.995627	0.411079
0.293217	0.382932	0.323851	0.223684	0.221491	0.258772	0.017505	0.28884	0.544858	0.761488	1	0.004376	0.229759	0.47046	0.750547	0.984683	0.002188	0.234136	0.501094	0.719912	0.997812	0.380744	0.185996	0.43326	0.070175	0.100877	0.004386	0.002188	0.236324	0.527352	0.741794	1	0.094092	0.326039	0.483589	0.719912	0.995624	0.008753	0.205689	0.496718	0.761488	0.967177	0.573304	0.390351	0.008753	0.234136	0.477024	0.719912	0.991247	0.437637
0.385281	0.320346	0.294372	0.247826	0.230435	0.182609	0.038961	0.25974	0.47619	0.744589	0.987013	0.008658	0.181818	0.463203	0.649351	1	0.004329	0.277056	0.614719	0.796537	0.995671	0.515152	0.225108	0.25974	0.104348	0.052174	0.008696	0.004329	0.337662	0.510823	0.709957	1	0.112554	0.30303	0.545455	0.822511	0.896104	0.012987	0.073593	0.246753	0.78355	0.965368	0.47619	0.408696	0.030303	0.255411	0.571429	0.74026	0.961039	0.320346
0.342045	0.409091	0.248864	0.262799	0.171786	0.188851	0.006818	0.228409	0.496591	0.767045	0.996591	0.002273	0.351136	0.544318	0.754545	1	0.001136	0.165909	0.385227	0.6875	0.998864	0.760227	0.063636	0.176136	0.031854	0.031854	0.002275	0.001136	0.3875	0.584091	0.792045	1	0.029545	0.138636	0.231818	0.648864	0.868182	0.009091	0.056818	0.163636	0.281818	0.994318	0.270455	0.304892	0.003409	0.122727	0.25	0.442045	0.995455	0.404545
0.374408	0.334123	0.291469	0.228029	0.228029	0.213777	0.004739	0.303318	0.514218	0.765403	0.99763	0.007109	0.279621	0.545024	0.741706	0.983412	0.00237	0.177725	0.405213	0.684834	1	0.566351	0.094787	0.338863	0.035629	0.078385	0.007126	0.00237	0.322275	0.594787	0.78673	1	0.049763	0.263033	0.393365	0.471564	0.969194	0.023697	0.116114	0.343602	0.654028	0.995261	0.450237	0.413302	0.018957	0.189573	0.393365	0.64218	0.995261	0.372038
0.395876	0.347423	0.256701	0.251806	0.201238	0.169247	0.006186	0.253608	0.543299	0.760825	1	0.002062	0.337113	0.527835	0.769072	0.997938	0.001031	0.160825	0.375258	0.690722	0.996907	0.687629	0.073196	0.239175	0.037152	0.068111	0.004128	0.001031	0.34433	0.556701	0.754639	1	0.027835	0.174227	0.290722	0.724742	0.981443	0.005155	0.084536	0.247423	0.735052	0.997938	0.374227	0.352941	0.003093	0.157732	0.378351	0.672165	0.996907	0.375258
0.368564	0.317073	0.314363	0.222343	0.241866	0.204989	0.001626	0.268293	0.523035	0.736585	0.996206	0.003252	0.267751	0.507859	0.754472	0.999458	0.000542	0.211924	0.461247	0.755556	1	0.511111	0.102981	0.385908	0.045553	0.075922	0.003254	0.000542	0.333333	0.559892	0.762602	1	0.001084	0.124661	0.370732	0.539295	0.980488	0.007588	0.182114	0.463415	0.814092	0.995122	0.523035	0.367679	0.002168	0.239566	0.481843	0.755556	0.998374	0.345257
0.419429	0.310857	0.269714	0.231121	0.212815	0.172769	0.003429	0.284571	0.573714	0.790857	0.996571	0.002286	0.229714	0.472	0.749714	1	0.001143	0.234286	0.417143	0.627429	0.995429	0.500571	0.132571	0.366857	0.051487	0.083524	0.008009	0.001143	0.230857	0.585143	0.778286	1	0.059429	0.253714	0.397714	0.656	0.966857	0.045714	0.261714	0.492571	0.766857	0.996571	0.406857	0.356979	0.005714	0.224	0.393143	0.562286	0.995429	0.341714
0.385332	0.351572	0.263097	0.278555	0.184149	0.17366	0.002328	0.207218	0.500582	0.771828	1	0.006985	0.252619	0.450524	0.738068	0.998836	0.001164	0.268917	0.545984	0.736903	0.969732	0.463329	0.123399	0.413271	0.04662	0.09324	0.006993	0.001164	0.19674	0.398137	0.740396	1	0.020955	0.273574	0.533178	0.662398	0.804424	0.058207	0.296857	0.555297	0.813737	0.976717	0.43539	0.324009	0.020955	0.351572	0.525029	0.715949	0.969732	0.380675
0.356917	0.427666	0.215417	0.27907	0.150106	0.174419	0.002112	0.192186	0.472017	0.731785	0.998944	0.006336	0.270327	0.589229	0.797254	1	0.001056	0.275607	0.43717	0.599789	0.997888	0.644139	0.105597	0.250264	0.039112	0.053911	0.003171	0.001056	0.210137	0.618796	0.829989	1	0.020063	0.372756	0.481521	0.582893	0.965153	0.040127	0.277719	0.407603	0.560718	0.800422	0.475185	0.325581	0.003168	0.319958	0.501584	0.739176	0.986272	0.451954
0.348765	0.354938	0.296296	0.225657	0.213292	0.208655	0.013889	0.268519	0.516975	0.794753	0.996914	0.003086	0.179012	0.447531	0.722222	1	0.001543	0.299383	0.537037	0.740741	0.998457	0.50463	0.166667	0.328704	0.068006	0.071097	0.006182	0.001543	0.16821	0.344136	0.649691	1	0.018519	0.353395	0.609568	0.760802	0.912037	0.050926	0.41821	0.583333	0.810185	0.976852	0.513889	0.374034	0.010802	0.32716	0.537037	0.746914	0.998457	0.376543
0.437016	0.322674	0.24031	0.262852	0.200776	0.152279	0.002907	0.16376	0.40407	0.741279	0.998062	0.001938	0.286822	0.534884	0.761628	0.997093	0.000969	0.372093	0.545543	0.732558	1	0.496124	0.125969	0.377907	0.050436	0.075655	0.00582	0.000969	0.176357	0.356589	0.69186	1	0.008721	0.460271	0.57655	0.695736	0.999031	0.061047	0.371124	0.58624	0.793605	0.987403	0.392442	0.325897	0.007752	0.407946	0.552326	0.718023	0.997093	0.360465
0.315315	0.418919	0.265766	0.270677	0.141353	0.190977	0.012012	0.193694	0.496997	0.779279	0.996997	0.003003	0.192192	0.426426	0.707207	1	0.001502	0.381381	0.564565	0.764264	0.986486	0.516517	0.138138	0.345345	0.055639	0.070677	0.007519	0.001502	0.186186	0.366366	0.684685	1	0.004505	0.430931	0.645646	0.8003	0.914414	0.01952	0.348348	0.564565	0.791291	0.996997	0.478979	0.336842	0.003003	0.381381	0.548048	0.764264	0.986486	0.435435
0.370618	0.325543	0.30384	0.214047	0.217391	0.198997	0.003339	0.203673	0.479132	0.752922	0.998331	0.006678	0.257095	0.467446	0.741235	1	0.001669	0.308848	0.529215	0.732888	0.993322	0.435726	0.153589	0.410684	0.056856	0.090301	0.006689	0.001669	0.15025	0.355593	0.687813	1	0.026711	0.400668	0.589316	0.737896	0.861436	0.005008	0.327212	0.542571	0.786311	0.994992	0.482471	0.327759	0.005008	0.350584	0.524207	0.734558	0.993322	0.348915
0.391003	0.290657	0.318339	0.211438	0.256499	0.162912	0.00692	0.299308	0.569204	0.83218	0.99654	0.00346	0.200692	0.50173	0.721453	0.986159	0.00173	0.214533	0.451557	0.688581	1	0.366782	0.141869	0.491349	0.051993	0.083189	0.003466	0.00173	0.238754	0.532872	0.780277	1	0.084775	0.237024	0.382353	0.543253	0.756055	0.022491	0.252595	0.525952	0.83737	0.99481	0.489619	0.34662	0.010381	0.202422	0.422145	0.610727	0.99308	0.32872
0.382582	0.349922	0.267496	0.274143	0.214953	0.188474	0.004666	0.317263	0.562986	0.765163	0.998445	0.00311	0.222395	0.489891	0.790047	1	0.001555	0.202177	0.412131	0.651633	0.993779	0.51633	0.144635	0.339036	0.057632	0.066978	0.007788	0.001555	0.29549	0.676516	0.861586	1	0.07154	0.283048	0.391913	0.539658	0.872473	0.012442	0.186625	0.40591	0.606532	0.85381	0.471229	0.342679	0.012442	0.202177	0.412131	0.62675	0.993779	0.387247
0.3674	0.373868	0.258732	0.244819	0.190415	0.203368	0.002587	0.27555	0.535576	0.76326	0.998706	0.003881	0.201811	0.447607	0.719276	0.996119	0.001294	0.26132	0.543338	0.773609	1	0.597671	0.142303	0.260026	0.069948	0.059585	0.002591	0.001294	0.194049	0.429495	0.654592	1	0.060802	0.401035	0.635188	0.791721	0.997413	0.021992	0.344114	0.609314	0.873221	0.968952	0.394567	0.375648	0.012937	0.218629	0.454075	0.736093	0.997413	0.411384
0.336	0.4192	0.2448	0.258013	0.152244	0.189103	0.0144	0.2976	0.5424	0.7664	0.9984	0.0032	0.2576	0.592	0.8224	1	0.0016	0.2096	0.3584	0.5344	0.9408	0.5872	0.1152	0.2976	0.041667	0.076923	0.003205	0.0016	0.2896	0.6848	0.8432	1	0.1216	0.2576	0.4016	0.5264	0.6048	0.016	0.1872	0.3648	0.536	0.9952	0.4032	0.307692	0.0192	0.2176	0.3776	0.5568	0.976	0.4192
0.400947	0.318863	0.280189	0.237757	0.21485	0.195103	0.003946	0.201263	0.434886	0.710339	1	0.001579	0.273875	0.513812	0.737964	0.995264	0.000789	0.325967	0.575375	0.796369	0.993686	0.416732	0.1397	0.443567	0.047393	0.082148	0.00158	0.000789	0.265193	0.51618	0.766377	1	0.32281	0.468035	0.604578	0.895817	0.993686	0.003157	0.187845	0.410418	0.722968	0.973954	0.453039	0.322275	0.003157	0.384373	0.588792	0.793212	0.993686	0.343331
0.334694	0.338776	0.326531	0.239782	0.202997	0.220708	0.005442	0.216327	0.482993	0.74966	1	0.002721	0.220408	0.493878	0.736054	0.998639	0.001361	0.296599	0.510204	0.753741	0.994558	0.404082	0.14966	0.446259	0.049046	0.095368	0	0.001361	0.236735	0.526531	0.759184	1	0.134694	0.27483	0.481633	0.536054	0.95102	0.013605	0.206803	0.553741	0.771429	0.987755	0.559184	0.318801	0.004082	0.285714	0.506122	0.729252	0.995918	0.357823
0.330626	0.358245	0.311129	0.233333	0.202439	0.222764	0.007311	0.216084	0.459789	0.720552	0.993501	0.001625	0.233144	0.48091	0.758733	1	0.000812	0.295695	0.535337	0.762794	0.998375	0.429732	0.137287	0.432981	0.047967	0.086992	0.004065	0.000812	0.186028	0.461413	0.718928	1	0.030057	0.457352	0.625508	0.87896	0.952071	0.001625	0.26645	0.476848	0.757108	0.992689	0.510154	0.349593	0.003249	0.305443	0.537774	0.75792	0.998375	0.379366
0.329258	0.380786	0.289956	0.246503	0.181818	0.222028	0.004367	0.230568	0.510044	0.719651	0.998253	0.001747	0.273362	0.50393	0.777293	0.999127	0.000873	0.256769	0.478603	0.737991	1	0.464629	0.126638	0.408734	0.050699	0.082168	0.003497	0.000873	0.215721	0.50131	0.761572	1	0.039301	0.28821	0.396507	0.669869	0.988646	0.020087	0.259389	0.527511	0.764192	0.99738	0.526638	0.358392	0.017467	0.254148	0.468996	0.71441	0.993886	0.401747
0.339233	0.333333	0.327434	0.223043	0.22452	0.211226	0.00295	0.30826	0.529499	0.762537	1	0.007375	0.231563	0.466077	0.712389	0.99705	0.001475	0.221239	0.483776	0.752212	0.998525	0.353982	0.181416	0.464602	0.063516	0.081241	0.004431	0.001475	0.249263	0.579646	0.809735	1	0.029499	0.240413	0.668142	0.867257	0.963127	0.007375	0.265487	0.446903	0.646018	0.9941	0.528024	0.398818	0.00885	0.212389	0.455752	0.69764	0.995575	0.340708
0.328209	0.377402	0.294389	0.226154	0.198462	0.216923	0.002306	0.223674	0.468101	0.743274	0.999231	0.001537	0.233666	0.514988	0.782475	0.998463	0.000769	0.280553	0.511145	0.732513	1	0.499616	0.139892	0.360492	0.052308	0.072308	0.004615	0.000769	0.241353	0.508071	0.827825	1	0.017679	0.249808	0.478094	0.583397	0.95465	0.002306	0.277479	0.498078	0.705611	0.90392	0.531899	0.347692	0.003843	0.318985	0.552652	0.782475	0.997694	0.393543
0.349921	0.349398	0.300681	0.237421	0.208071	0.21174	0.002095	0.193819	0.466213	0.751179	0.998428	0.003667	0.282347	0.521739	0.756417	1	0.000524	0.262441	0.511786	0.739654	0.999476	0.487166	0.110005	0.402829	0.045597	0.078092	0.005765	0.000524	0.194343	0.500786	0.732844	1	0.021477	0.243059	0.515977	0.638554	0.97957	0.008381	0.283918	0.489785	0.798848	0.997905	0.514929	0.368973	0.005238	0.276585	0.524882	0.728654	0.999476	0.374018
0.333333	0.336391	0.330275	0.230061	0.254601	0.184049	0.009174	0.266055	0.522936	0.755352	0.981651	0.006116	0.201835	0.449541	0.743119	1	0.003058	0.281346	0.504587	0.715596	0.996942	0.409786	0.143731	0.446483	0.042945	0.079755	0	0.003058	0.12844	0.382263	0.654434	1	0.186544	0.269113	0.394495	0.571865	0.648318	0.058104	0.296636	0.69419	0.853211	0.981651	0.522936	0.404908	0.027523	0.266055	0.486239	0.724771	0.996942	0.370031
0.460526	0.305921	0.233553	0.254125	0.207921	0.132013	0.016447	0.266447	0.460526	0.667763	0.993421	0.006579	0.223684	0.542763	0.776316	1	0.003289	0.203947	0.575658	0.773026	0.967105	0.361842	0.072368	0.565789	0.019802	0.079208	0.006601	0.003289	0.282895	0.5625	0.815789	1	0.565789	0.578947	0.684211	0.723684	0.8125	0.016447	0.217105	0.421053	0.667763	0.976974	0.378289	0.389439	0.023026	0.236842	0.625	0.759868	0.967105	0.315789
0.39823	0.348673	0.253097	0.237589	0.161348	0.159574	0.00531	0.306195	0.646018	0.861947	1	0.00354	0.20708	0.460177	0.715044	0.99115	0.00177	0.235398	0.40708	0.575221	0.943363	0.60354	0.166372	0.230088	0.051418	0.065603	0.005319	0.00177	0.307965	0.688496	0.838938	1	0.00531	0.215929	0.338053	0.578761	0.642478	0.030088	0.230088	0.4	0.486726	0.906195	0.361062	0.283688	0.00708	0.20708	0.366372	0.523894	0.688496	0.380531
0.294404	0.389294	0.316302	0.209756	0.185366	0.24878	0.009732	0.182482	0.440389	0.705596	0.995134	0.007299	0.26764	0.515815	0.768856	0.997567	0.002433	0.248175	0.513382	0.781022	1	0.547445	0.184915	0.26764	0.063415	0.058537	0	0.002433	0.23601	0.540146	0.746959	1	0.082725	0.22871	0.403893	0.579075	0.885645	0.043796	0.277372	0.549878	0.79562	0.987835	0.532847	0.4	0.012165	0.291971	0.586375	0.798054	0.992701	0.386861
0.291105	0.361186	0.347709	0.194595	0.194595	0.259459	0.024259	0.210243	0.458221	0.684636	0.994609	0.005391	0.239892	0.512129	0.733154	0.997305	0.002695	0.277628	0.509434	0.778976	1	0.45283	0.221024	0.326146	0.083784	0.056757	0.002703	0.002695	0.207547	0.487871	0.754717	1	0.016173	0.28841	0.433962	0.762803	0.894879	0.021563	0.253369	0.568733	0.74124	0.994609	0.528302	0.362162	0.013477	0.296496	0.54717	0.816712	0.989218	0.380054
0.366925	0.421189	0.211886	0.264249	0.129534	0.173575	0.020672	0.310078	0.434109	0.723514	0.989664	0.007752	0.178295	0.472868	0.687339	1	0.002584	0.242894	0.630491	0.819121	0.992248	0.635659	0.118863	0.245478	0.041451	0.041451	0	0.002584	0.165375	0.447028	0.651163	1	0.124031	0.630491	0.739018	0.863049	0.94832	0.25323	0.333333	0.563307	0.777778	0.96124	0.364341	0.316062	0.007752	0.263566	0.565891	0.751938	0.992248	0.44186
0.409653	0.347772	0.242574	0.288724	0.185874	0.167286	0.011139	0.195545	0.518564	0.780941	1	0.00495	0.27599	0.493812	0.74505	0.997525	0.001238	0.318069	0.486386	0.662129	0.982673	0.54703	0.113861	0.339109	0.043371	0.083024	0.006196	0.001238	0.167079	0.363861	0.811881	1	0.002475	0.37005	0.506188	0.616337	0.918317	0.024752	0.393564	0.596535	0.768564	0.966584	0.419554	0.319703	0.003713	0.310644	0.461634	0.649752	0.982673	0.423267
0.438392	0.299611	0.261997	0.250649	0.218182	0.164935	0.003891	0.203632	0.478599	0.785992	1	0.002594	0.287938	0.474708	0.7393	0.994812	0.001297	0.354086	0.542153	0.721141	0.984436	0.523995	0.119326	0.35668	0.042857	0.066234	0.003896	0.001297	0.154345	0.289235	0.609598	1	0.029831	0.466926	0.601816	0.726329	0.907912	0.042802	0.453956	0.674449	0.856031	0.98703	0.404669	0.309091	0.014267	0.394293	0.538262	0.731518	0.985733	0.355383
0.393777	0.378755	0.227468	0.276047	0.167562	0.166488	0.002146	0.22103	0.453863	0.759657	1	0.006438	0.265021	0.498927	0.762876	0.995708	0.001073	0.362661	0.531116	0.712446	0.993562	0.533262	0.100858	0.36588	0.038668	0.079484	0.004296	0.001073	0.201717	0.378755	0.727468	1	0.045064	0.403433	0.555794	0.684549	0.767167	0.01073	0.374464	0.567597	0.804721	0.966738	0.407725	0.322234	0.022532	0.370172	0.519313	0.712446	0.993562	0.4603
0.331974	0.404568	0.263458	0.277551	0.179592	0.205714	0.001631	0.254486	0.47553	0.755302	0.995106	0.002447	0.22186	0.486134	0.722675	0.999184	0.000816	0.269168	0.552202	0.778956	1	0.603589	0.141109	0.255302	0.068571	0.047347	0.001633	0.000816	0.21615	0.447798	0.704731	1	0.006525	0.365416	0.618271	0.78385	0.996737	0.030995	0.261827	0.550571	0.757749	0.99429	0.453507	0.370612	0.004894	0.271615	0.594617	0.80832	0.998369	0.412724
0.373344	0.31043	0.316225	0.195526	0.243579	0.203811	0.001656	0.24255	0.514073	0.695364	0.999172	0.002483	0.286424	0.53394	0.816225	0.998344	0.000828	0.235099	0.444536	0.733444	1	0.428808	0.086093	0.485099	0.033969	0.075394	0.0058	0.000828	0.264901	0.53394	0.835265	1	0.00745	0.235927	0.299669	0.509934	0.961921	0.005795	0.196192	0.499172	0.698675	0.976821	0.419702	0.404308	0.003311	0.226821	0.418874	0.711093	0.997517	0.332781
0.404103	0.323818	0.272079	0.267857	0.191071	0.163393	0.001784	0.231044	0.444246	0.706512	0.996432	0.006244	0.254237	0.459411	0.736842	1	0.000892	0.347904	0.589652	0.79661	0.997324	0.580731	0.165031	0.254237	0.071429	0.057143	0.003571	0.000892	0.224799	0.383586	0.706512	1	0.024978	0.199822	0.494202	0.751115	0.99554	0.008921	0.473684	0.666369	0.794826	0.990187	0.409456	0.317857	0.002676	0.417484	0.611062	0.790366	0.997324	0.341659
0.331915	0.310638	0.357447	0.213675	0.247863	0.230769	0.017021	0.251064	0.553191	0.791489	0.995745	0.008511	0.178723	0.429787	0.66383	0.931915	0.004255	0.297872	0.489362	0.73617	1	0.451064	0.323404	0.225532	0.106838	0.07265	0.004274	0.004255	0.208511	0.442553	0.634043	1	0.046809	0.187234	0.32766	0.570213	0.812766	0.025532	0.685106	0.851064	0.906383	0.974468	0.53617	0.34188	0.046809	0.27234	0.510638	0.731915	0.961702	0.33617
0.365385	0.303846	0.330769	0.185328	0.235521	0.19305	0.007692	0.296154	0.565385	0.815385	1	0.030769	0.207692	0.419231	0.676923	0.992308	0.003846	0.25	0.465385	0.684615	0.984615	0.476923	0.3	0.223077	0.104247	0.065637	0.003861	0.003846	0.226923	0.469231	0.707692	1	0.019231	0.146154	0.284615	0.480769	0.880769	0.338462	0.619231	0.757692	0.819231	0.980769	0.542308	0.34749	0.019231	0.242308	0.473077	0.669231	0.988462	0.334615
0.278873	0.51831	0.202817	0.274011	0.081921	0.251412	0.011268	0.143662	0.338028	0.732394	0.988732	0.005634	0.301408	0.495775	0.757746	0.994366	0.002817	0.346479	0.543662	0.723944	1	0.895775	0.033803	0.070423	0.028249	0.028249	0	0.002817	0.301408	0.538028	0.769014	1	0.016901	0.022535	0.498592	0.55493	0.95493	0.053521	0.101408	0.11831	0.250704	0.974648	0.388732	0.389831	0.016901	0.411268	0.552113	0.749296	0.983099	0.509859
0.354108	0.458924	0.186969	0.292614	0.116477	0.198864	0.008499	0.215297	0.371105	0.674221	0.988669	0.005666	0.294618	0.543909	0.78187	1	0.002833	0.303116	0.498584	0.747875	0.997167	0.866856	0.036827	0.096317	0.019886	0.03125	0.014205	0.002833	0.252125	0.535411	0.776204	1	0.016997	0.022663	0.076487	0.345609	0.86119	0.067989	0.25779	0.29745	0.354108	0.569405	0.31728	0.323864	0.014164	0.314448	0.518414	0.756374	0.983003	0.444759
0.350427	0.509972	0.139601	0.382857	0.074286	0.151429	0.011396	0.222222	0.410256	0.68661	0.997151	0.005698	0.259259	0.549858	0.760684	1	0.002849	0.239316	0.501425	0.717949	0.985755	0.940171	0.048433	0.011396	0.025714	0.002857	0.002857	0.002849	0.264957	0.509972	0.74359	1	0.019943	0.02849	0.14245	0.418803	0.97151	0.974359	0.974359	0.977208	0.980057	0.982906	0.216524	0.268571	0.014245	0.324786	0.521368	0.789174	0.985755	0.441595
0.345133	0.510324	0.144543	0.322485	0.076923	0.180473	0.014749	0.20059	0.380531	0.59882	1	0.011799	0.315634	0.572271	0.766962	0.9941	0.00295	0.292035	0.557522	0.80236	0.985251	0.935103	0.020649	0.044248	0.023669	0.04142	0	0.00295	0.265487	0.519174	0.755162	1	0.032448	0.032448	0.132743	0.442478	0.852507	0.20059	0.20649	0.218289	0.410029	0.973451	0.233038	0.337278	0.00885	0.433628	0.690265	0.855457	0.982301	0.466077
0.405714	0.434286	0.16	0.270115	0.086207	0.143678	0.022857	0.217143	0.451429	0.651429	0.977143	0.011429	0.285714	0.491429	0.805714	0.988571	0.005714	0.148571	0.657143	0.788571	1	0.782857	0.04	0.177143	0.034483	0.068966	0	0.005714	0.274286	0.474286	0.748571	1	0.034286	0.034286	0.045714	0.782857	0.794286	0.137143	0.194286	0.662857	0.708571	0.948571	0.257143	0.275862	0.028571	0.228571	0.662857	0.805714	0.965714	0.422857
0.358621	0.468966	0.172414	0.347222	0.083333	0.166667	0.027586	0.296552	0.448276	0.668966	0.972414	0.013793	0.248276	0.510345	0.82069	0.986207	0.006897	0.227586	0.524138	0.772414	1	0.717241	0.131034	0.151724	0.048611	0.048611	0.006944	0.006897	0.268966	0.448276	0.8	1	0.068966	0.089655	0.234483	0.537931	0.855172	0.151724	0.558621	0.682759	0.717241	0.758621	0.289655	0.25	0.062069	0.241379	0.565517	0.834483	0.958621	0.462069
0.324228	0.350356	0.325416	0.239001	0.210464	0.224732	0.008314	0.238717	0.486936	0.73753	0.998812	0.003563	0.251781	0.534442	0.774347	0.996437	0.001188	0.239905	0.480998	0.726841	1	0.406176	0.2019	0.391924	0.070155	0.084423	0.008323	0.001188	0.249406	0.526128	0.756532	1	0.004751	0.23753	0.566508	0.700713	0.947743	0.007126	0.25772	0.396675	0.748219	0.997625	0.598575	0.35434	0.004751	0.220903	0.488124	0.752969	0.996437	0.385986
0.352717	0.341277	0.306006	0.212786	0.228053	0.22042	0.00572	0.285033	0.508103	0.769304	0.999047	0.001907	0.22307	0.485224	0.730219	0.996187	0.000953	0.242135	0.490944	0.716873	1	0.319352	0.102955	0.577693	0.039122	0.08874	0.002863	0.000953	0.335558	0.522402	0.754051	1	0.225929	0.442326	0.645377	0.703527	0.931363	0.00858	0.182078	0.382269	0.748332	0.999047	0.502383	0.391221	0.009533	0.239276	0.510963	0.743565	0.99428	0.375596
0.315018	0.43956	0.245421	0.294118	0.154412	0.1875	0.007326	0.21978	0.424908	0.695971	0.981685	0.010989	0.227106	0.567766	0.81685	1	0.003663	0.249084	0.472527	0.699634	0.989011	0.626374	0.113553	0.260073	0.036765	0.051471	0	0.003663	0.186813	0.520147	0.842491	1	0.054945	0.527473	0.630037	0.688645	0.791209	0.091575	0.289377	0.380952	0.575092	0.74359	0.347985	0.352941	0.018315	0.201465	0.538462	0.699634	0.989011	0.428571
0.410345	0.258621	0.331034	0.197232	0.276817	0.16263	0.006897	0.341379	0.544828	0.782759	1	0.010345	0.12069	0.37931	0.675862	0.910345	0.003448	0.248276	0.451724	0.765517	0.996552	0.396552	0.251724	0.351724	0.083045	0.062284	0	0.003448	0.203448	0.482759	0.631034	1	0.013793	0.17931	0.496552	0.775862	0.944828	0.055172	0.344828	0.544828	0.696552	0.993103	0.565517	0.366782	0.010345	0.210345	0.465517	0.713793	0.993103	0.265517
0.341463	0.296167	0.362369	0.192308	0.22028	0.255245	0.006969	0.261324	0.519164	0.770035	0.993031	0.017422	0.195122	0.466899	0.724739	0.996516	0.003484	0.296167	0.512195	0.735192	1	0.400697	0.236934	0.362369	0.076923	0.055944	0	0.003484	0.191638	0.452962	0.658537	1	0.020906	0.1777	0.421603	0.801394	0.982578	0.069686	0.362369	0.567944	0.839721	0.933798	0.581882	0.328671	0.017422	0.212544	0.442509	0.71777	0.982578	0.264808
0.325949	0.363924	0.310127	0.228571	0.196825	0.209524	0.009494	0.281646	0.503165	0.78481	0.996835	0.006329	0.205696	0.414557	0.661392	0.984177	0.003165	0.25	0.528481	0.794304	1	0.424051	0.218354	0.357595	0.069841	0.069841	0	0.003165	0.208861	0.420886	0.632911	1	0.028481	0.170886	0.433544	0.75	0.936709	0.072785	0.389241	0.579114	0.822785	0.974684	0.553797	0.349206	0.025316	0.212025	0.458861	0.718354	0.987342	0.408228
0.340836	0.363344	0.29582	0.245161	0.183871	0.2	0.009646	0.308682	0.578778	0.778135	1	0.006431	0.167203	0.434084	0.649518	0.996785	0.003215	0.276527	0.517685	0.77492	0.990354	0.421222	0.221865	0.356913	0.077419	0.058065	0	0.003215	0.167203	0.44373	0.649518	1	0.051447	0.196141	0.418006	0.755627	0.945338	0.096463	0.366559	0.572347	0.829582	0.983923	0.546624	0.335484	0.054662	0.237942	0.472669	0.726688	0.990354	0.379421
0.33123	0.353312	0.315457	0.259494	0.177215	0.246835	0.012618	0.271293	0.520505	0.772871	0.990536	0.006309	0.176656	0.44795	0.694006	0.996845	0.003155	0.287066	0.514196	0.744479	1	0.403785	0.22082	0.375394	0.063291	0.063291	0	0.003155	0.157729	0.40694	0.637224	1	0.059937	0.208202	0.425868	0.782334	0.949527	0.097792	0.369085	0.574132	0.829653	0.987382	0.542587	0.316456	0.056782	0.239748	0.492114	0.722397	0.993691	0.394322
0.396667	0.256667	0.346667	0.207358	0.230769	0.19398	0.01	0.276667	0.493333	0.74	1	0.016667	0.193333	0.476667	0.75	0.986667	0.003333	0.266667	0.5	0.76	0.993333	0.403333	0.25	0.346667	0.073579	0.053512	0	0.003333	0.203333	0.483333	0.7	1	0.02	0.18	0.5	0.77	0.933333	0.06	0.336667	0.536667	0.68	0.976667	0.556667	0.354515	0.016667	0.21	0.466667	0.71	0.986667	0.253333
0.389016	0.308924	0.302059	0.236239	0.238532	0.162844	0.004577	0.240275	0.512586	0.757437	1	0.006865	0.183066	0.411899	0.691076	0.981693	0.002288	0.352403	0.572082	0.796339	0.997712	0.356979	0.185355	0.457666	0.052752	0.071101	0.002294	0.002288	0.254005	0.457666	0.716247	1	0.016018	0.446224	0.633867	0.881007	0.997712	0.006865	0.203661	0.487414	0.7254	0.970252	0.528604	0.376147	0.006865	0.304348	0.517162	0.78032	0.997712	0.340961
0.408935	0.305842	0.285223	0.208262	0.277108	0.163511	0.006873	0.218213	0.498282	0.721649	0.994845	0.003436	0.249141	0.544674	0.852234	0.998282	0.001718	0.276632	0.465636	0.689003	1	0.503436	0.121993	0.37457	0.043029	0.08778	0.008606	0.001718	0.281787	0.546392	0.852234	1	0.072165	0.295533	0.333333	0.699313	0.969072	0.013746	0.176976	0.455326	0.627148	0.967354	0.439863	0.371773	0.022337	0.30756	0.494845	0.702749	0.984536	0.353952
0.249012	0.442688	0.3083	0.206349	0.162698	0.261905	0.031621	0.256917	0.529644	0.758893	1	0.007905	0.213439	0.478261	0.774704	0.996047	0.003953	0.26087	0.474308	0.695652	0.988142	0.418972	0.189723	0.391304	0.055556	0.087302	0	0.003953	0.217391	0.537549	0.853755	1	0.142292	0.316206	0.395257	0.608696	0.70751	0.027668	0.205534	0.490119	0.790514	0.913043	0.525692	0.373016	0.043478	0.237154	0.442688	0.624506	0.988142	0.422925
0.346939	0.318367	0.334694	0.221311	0.258197	0.204918	0.008163	0.212245	0.453061	0.75102	1	0.028571	0.24898	0.502041	0.734694	0.991837	0.004082	0.261224	0.510204	0.714286	0.983673	0.4	0.183673	0.416327	0.069672	0.094262	0.004098	0.004082	0.155102	0.383673	0.689796	1	0.044898	0.232653	0.497959	0.628571	0.722449	0.061224	0.277551	0.571429	0.828571	0.983673	0.57551	0.434426	0.028571	0.240816	0.465306	0.677551	0.983673	0.257143
0.294671	0.46395	0.241379	0.27044	0.147799	0.213836	0.009404	0.188088	0.470219	0.717868	1	0.00627	0.200627	0.45768	0.755486	0.996865	0.003135	0.360502	0.570533	0.777429	0.978056	0.489028	0.153605	0.357367	0.044025	0.069182	0	0.003135	0.122257	0.341693	0.69906	1	0.275862	0.423197	0.485893	0.658307	0.739812	0.184953	0.369906	0.586207	0.830721	0.968652	0.485893	0.358491	0.012539	0.322884	0.526646	0.702194	0.968652	0.460815
0.506369	0.288217	0.205414	0.299841	0.236045	0.118022	0.006369	0.246815	0.549363	0.765924	0.998408	0.003185	0.227707	0.452229	0.66879	0.992038	0.001592	0.261146	0.480892	0.742038	1	0.568471	0.082803	0.348726	0.031898	0.095694	0.00319	0.001592	0.187898	0.47293	0.753185	1	0.052548	0.237261	0.414013	0.468153	0.882166	0.020701	0.363057	0.578025	0.780255	0.984076	0.294586	0.299841	0.007962	0.270701	0.444268	0.652866	0.980892	0.363057
0.394737	0.398496	0.206767	0.29434	0.166038	0.139623	0.022556	0.236842	0.541353	0.759398	0.988722	0.007519	0.191729	0.443609	0.729323	1	0.003759	0.274436	0.522556	0.669173	0.996241	0.511278	0.048872	0.43985	0.022642	0.083019	0	0.003759	0.146617	0.443609	0.845865	1	0.25188	0.259398	0.353383	0.364662	0.488722	0.033835	0.319549	0.605263	0.733083	0.992481	0.308271	0.316981	0.045113	0.334586	0.578947	0.706767	0.996241	0.394737
0.498559	0.270893	0.230548	0.242775	0.231214	0.138728	0.008646	0.216138	0.414986	0.752161	0.994236	0.005764	0.311239	0.527378	0.723343	0.991354	0.002882	0.308357	0.510086	0.731988	1	0.487032	0.069164	0.443804	0.040462	0.080925	0	0.002882	0.247839	0.420749	0.668588	1	0.011527	0.051873	0.423631	0.504323	0.59366	0.095101	0.345821	0.616715	0.778098	0.994236	0.291066	0.312139	0.014409	0.420749	0.585014	0.720461	0.997118	0.340058
0.283537	0.60061	0.115854	0.30687	0.083969	0.122137	0.007622	0.329268	0.5625	0.786585	0.996951	0.003049	0.190549	0.39939	0.722561	1	0.001524	0.527439	0.632622	0.806402	0.978659	0.862805	0.04878	0.088415	0.025954	0.025954	0.001527	0.001524	0.269817	0.48628	0.772866	1	0.07622	0.551829	0.608232	0.635671	0.817073	0.012195	0.088415	0.170732	0.640244	0.990854	0.527439	0.332824	0.009146	0.344512	0.612805	0.818598	0.978659	0.58689
0.302041	0.412245	0.285714	0.237705	0.20082	0.221311	0.020408	0.191837	0.42449	0.75102	1	0.008163	0.244898	0.485714	0.714286	0.995918	0.004082	0.289796	0.567347	0.771429	0.991837	0.485714	0.257143	0.257143	0.07377	0.065574	0	0.004082	0.232653	0.379592	0.677551	1	0.089796	0.187755	0.497959	0.673469	0.820408	0.012245	0.461224	0.722449	0.902041	0.987755	0.595918	0.344262	0.016327	0.306122	0.530612	0.722449	0.991837	0.440816
0.274725	0.483516	0.241758	0.238971	0.136029	0.220588	0.014652	0.175824	0.417582	0.739927	0.978022	0.007326	0.238095	0.47619	0.714286	1	0.003663	0.358974	0.615385	0.791209	0.956044	0.47619	0.238095	0.285714	0.069853	0.055147	0.003676	0.003663	0.271062	0.413919	0.659341	1	0.131868	0.227106	0.538462	0.710623	0.835165	0.010989	0.076923	0.608059	0.893773	0.978022	0.571429	0.301471	0.018315	0.307692	0.549451	0.728938	0.992674	0.516484
0.309278	0.340206	0.350515	0.213793	0.234483	0.237931	0.027491	0.24055	0.491409	0.718213	0.982818	0.006873	0.230241	0.450172	0.762887	1	0.003436	0.278351	0.512027	0.742268	0.996564	0.460481	0.257732	0.281787	0.089655	0.048276	0	0.003436	0.24055	0.436426	0.67354	1	0.116838	0.213058	0.474227	0.697595	0.828179	0.013746	0.360825	0.542955	0.890034	0.962199	0.536082	0.351724	0.017182	0.292096	0.505155	0.725086	0.996564	0.395189
0.307971	0.362319	0.32971	0.210909	0.221818	0.210909	0.021739	0.26087	0.518116	0.768116	1	0.007246	0.221014	0.42029	0.721014	0.996377	0.003623	0.289855	0.51087	0.742754	0.98913	0.460145	0.257246	0.282609	0.087273	0.058182	0	0.003623	0.242754	0.423913	0.677536	1	0.123188	0.221014	0.5	0.721014	0.858696	0.007246	0.380435	0.561594	0.913043	0.985507	0.550725	0.356364	0.014493	0.304348	0.528986	0.742754	0.98913	0.427536
0.370913	0.35513	0.273957	0.269752	0.194131	0.19526	0.007892	0.258174	0.531003	0.789177	1	0.002255	0.23788	0.505073	0.763247	0.997745	0.001127	0.228861	0.445321	0.645998	0.996618	0.514092	0.072153	0.413754	0.03386	0.072235	0.004515	0.001127	0.224352	0.468997	0.748591	1	0.170237	0.228861	0.373168	0.738444	0.971815	0.036077	0.293123	0.529876	0.759865	0.935738	0.414882	0.406321	0.013529	0.286359	0.441939	0.655017	0.996618	0.374295
0.40458	0.322519	0.272901	0.250478	0.229446	0.200765	0.003817	0.293893	0.545802	0.820611	1	0.017176	0.206107	0.501908	0.727099	0.996183	0.001908	0.232824	0.417939	0.65458	0.98855	0.46374	0.135496	0.400763	0.055449	0.070746	0.005736	0.001908	0.274809	0.589695	0.875954	1	0.078244	0.23855	0.412214	0.591603	0.990458	0.005725	0.211832	0.475191	0.688931	0.811069	0.496183	0.351816	0.005725	0.198473	0.412214	0.625954	0.992366	0.358779
0.357576	0.367677	0.274747	0.275304	0.204453	0.182186	0.008081	0.274747	0.476768	0.713131	1	0.006061	0.286869	0.606061	0.842424	0.99798	0.00202	0.2	0.379798	0.640404	0.991919	0.458586	0.070707	0.470707	0.026316	0.082996	0.006073	0.00202	0.40202	0.59596	0.860606	1	0.020202	0.064646	0.20202	0.767677	0.99596	0.006061	0.218182	0.381818	0.632323	0.951515	0.444444	0.384615	0.006061	0.177778	0.385859	0.640404	0.99596	0.381818
0.330827	0.402256	0.266917	0.254237	0.195857	0.20904	0.007519	0.265038	0.528195	0.74812	1	0.005639	0.272556	0.492481	0.825188	0.99812	0.00188	0.204887	0.445489	0.656015	0.992481	0.475564	0.092105	0.432331	0.035782	0.073446	0.00565	0.00188	0.383459	0.56015	0.849624	1	0.018797	0.069549	0.257519	0.766917	0.996241	0.005639	0.210526	0.368421	0.635338	0.947368	0.430451	0.357815	0.005639	0.169173	0.368421	0.637218	0.996241	0.422932
0.337025	0.356013	0.306962	0.240887	0.220285	0.202853	0.003165	0.251582	0.492089	0.724684	1	0.006329	0.21519	0.474684	0.78481	0.996835	0.001582	0.308544	0.518987	0.721519	0.985759	0.47943	0.045886	0.474684	0.019017	0.104596	0.009509	0.001582	0.126582	0.259494	0.612342	1	0.306962	0.503165	0.667722	0.963608	0.987342	0.006329	0.438291	0.620253	0.792722	0.949367	0.571203	0.393027	0.009494	0.264241	0.496835	0.716772	0.988924	0.387658
0.322624	0.46988	0.207497	0.266756	0.146113	0.206434	0.002677	0.263722	0.538153	0.795181	0.998661	0.004016	0.243641	0.497992	0.742972	1	0.001339	0.238286	0.444444	0.717537	0.994645	0.67336	0.10174	0.2249	0.037534	0.050938	0.002681	0.001339	0.246319	0.503347	0.738956	1	0.065596	0.219545	0.321285	0.757697	0.840696	0.088353	0.30656	0.682731	0.84739	0.995984	0.468541	0.33244	0.01071	0.219545	0.443106	0.605087	0.994645	0.453815
0.403226	0.33871	0.258065	0.275676	0.194595	0.221622	0.016129	0.22043	0.505376	0.817204	1	0.010753	0.236559	0.456989	0.715054	0.973118	0.005376	0.344086	0.516129	0.72043	0.983871	0.333333	0.11828	0.548387	0.07027	0.07027	0.005405	0.005376	0.112903	0.446237	0.693548	1	0.043011	0.064516	0.473118	0.763441	0.822581	0.188172	0.317204	0.564516	0.844086	0.983871	0.408602	0.4	0.048387	0.408602	0.553763	0.752688	0.983871	0.360215
0.315789	0.361842	0.322368	0.271523	0.205298	0.18543	0.026316	0.230263	0.493421	0.730263	0.993421	0.013158	0.263158	0.519737	0.822368	1	0.006579	0.236842	0.453947	0.684211	0.927632	0.361842	0.177632	0.460526	0.07947	0.07947	0	0.006579	0.184211	0.348684	0.875	1	0.052632	0.085526	0.164474	0.230263	0.940789	0.269737	0.453947	0.598684	0.75	0.868421	0.532895	0.437086	0.052632	0.269737	0.447368	0.690789	0.934211	0.368421
0.326241	0.326241	0.347518	0.185714	0.171429	0.235714	0.028369	0.22695	0.475177	0.680851	0.985816	0.014184	0.326241	0.553191	0.822695	1	0.007092	0.212766	0.446809	0.666667	0.950355	0.304965	0.156028	0.539007	0.064286	0.078571	0.007143	0.007092	0.170213	0.319149	0.617021	1	0.021277	0.049645	0.134752	0.191489	0.262411	0.269504	0.510638	0.673759	0.822695	0.957447	0.567376	0.428571	0.021277	0.234043	0.432624	0.680851	0.943262	0.319149
0.344828	0.301724	0.353448	0.246753	0.229437	0.212121	0.021552	0.206897	0.530172	0.784483	0.991379	0.008621	0.258621	0.400862	0.668103	0.99569	0.00431	0.271552	0.50431	0.758621	1	0.456897	0.288793	0.25431	0.095238	0.051948	0.008658	0.00431	0.168103	0.375	0.663793	1	0.025862	0.185345	0.456897	0.75	0.978448	0.25	0.405172	0.586207	0.780172	0.87069	0.603448	0.380952	0.012931	0.271552	0.482759	0.711207	0.982759	0.275862
0.423977	0.366959	0.209064	0.282577	0.174231	0.143485	0.002924	0.296784	0.565789	0.802632	0.995614	0.019006	0.269006	0.581871	0.77924	1	0.001462	0.140351	0.326023	0.498538	0.994152	0.618421	0.149123	0.232456	0.04978	0.038067	0.008785	0.001462	0.384503	0.668129	0.828947	1	0.00731	0.102339	0.23538	0.438596	0.80848	0.116959	0.27193	0.337719	0.52193	0.983918	0.423977	0.351391	0.005848	0.194444	0.393275	0.593567	0.99269	0.378655
0.405063	0.348101	0.246835	0.282092	0.196513	0.169572	0.003165	0.261076	0.52057	0.787975	0.995253	0.015823	0.280063	0.572785	0.781646	1	0.001582	0.199367	0.39557	0.620253	0.998418	0.530063	0.183544	0.286392	0.07607	0.050713	0.006339	0.001582	0.273734	0.617089	0.848101	1	0.007911	0.129747	0.27057	0.504747	0.993671	0.123418	0.299051	0.427215	0.661392	0.898734	0.463608	0.399366	0.006329	0.223101	0.43038	0.670886	0.993671	0.375
0.427332	0.264642	0.308026	0.230435	0.263043	0.143478	0.013015	0.225597	0.442516	0.698482	1	0.017354	0.249458	0.590022	0.770065	0.993492	0.002169	0.27115	0.524946	0.767896	0.997831	0.409978	0.106291	0.483731	0.043478	0.121739	0.008696	0.002169	0.18872	0.403471	0.687636	1	0.004338	0.498915	0.691974	0.839479	0.97397	0.032538	0.299349	0.4859	0.735358	0.997831	0.440347	0.36087	0.004338	0.444685	0.633406	0.819957	0.995662	0.279826
0.38833	0.327968	0.283702	0.274194	0.191532	0.197581	0.006036	0.217304	0.440644	0.696177	1	0.004024	0.245473	0.515091	0.746479	0.993964	0.002012	0.31992	0.561368	0.790744	0.991952	0.468813	0.092555	0.438632	0.042339	0.094758	0.006048	0.002012	0.158954	0.368209	0.661972	1	0.070423	0.593561	0.762575	0.889336	0.969819	0.004024	0.32998	0.535211	0.750503	0.991952	0.38833	0.342742	0.016097	0.484909	0.657948	0.841046	0.991952	0.358149
0.341297	0.320819	0.337884	0.219178	0.236301	0.212329	0.010239	0.180887	0.47099	0.709898	1	0.047782	0.327645	0.525597	0.740614	0.982935	0.003413	0.211604	0.484642	0.788396	0.993174	0.34471	0.12628	0.52901	0.047945	0.082192	0.006849	0.003413	0.290102	0.505119	0.795222	1	0.296928	0.406143	0.706485	0.808874	0.938567	0.006826	0.167235	0.443686	0.665529	0.976109	0.556314	0.40411	0.006826	0.307167	0.522184	0.754266	0.982935	0.337884
0.359195	0.304598	0.336207	0.227666	0.239193	0.195965	0.017241	0.198276	0.465517	0.692529	0.997126	0.005747	0.247126	0.528736	0.775862	1	0.002874	0.264368	0.485632	0.747126	0.979885	0.347701	0.106322	0.545977	0.040346	0.080692	0.005764	0.002874	0.284483	0.471264	0.718391	1	0.393678	0.485632	0.738506	0.824713	0.933908	0.008621	0.206897	0.454023	0.706897	0.994253	0.534483	0.37464	0.008621	0.341954	0.551724	0.784483	0.991379	0.324713
0.301691	0.511053	0.187256	0.266927	0.130208	0.154948	0.002601	0.231469	0.477243	0.708713	1	0.005202	0.240572	0.564369	0.804941	0.9987	0.0013	0.284785	0.452536	0.635891	0.958388	0.629389	0.140442	0.230169	0.061198	0.040365	0.001302	0.0013	0.224967	0.511053	0.772432	1	0.044213	0.271782	0.392718	0.544863	0.702211	0.071521	0.351105	0.576073	0.829649	0.972692	0.405722	0.346354	0.003901	0.271782	0.474642	0.724317	0.976593	0.524057
0.406204	0.355982	0.237814	0.281065	0.183432	0.173077	0.004431	0.264402	0.539143	0.788774	0.995569	0.002954	0.286558	0.586411	0.759232	1	0.001477	0.187592	0.373708	0.54062	0.998523	0.556869	0.144756	0.298375	0.050296	0.065089	0.011834	0.001477	0.361891	0.635155	0.799114	1	0.007386	0.096012	0.190547	0.435746	0.874446	0.115214	0.29099	0.412112	0.655835	0.994092	0.415066	0.352071	0.005908	0.193501	0.389956	0.595273	0.994092	0.385524
0.387967	0.383817	0.228216	0.295218	0.168399	0.158004	0.008299	0.302905	0.502075	0.767635	1	0.012448	0.238589	0.491701	0.70332	0.993776	0.002075	0.190871	0.489627	0.742739	0.989627	0.709544	0.141079	0.149378	0.049896	0.04158	0	0.002075	0.33195	0.524896	0.711618	1	0.080913	0.195021	0.263485	0.753112	0.844398	0.016598	0.056017	0.510373	0.792531	0.960581	0.383817	0.282744	0.012448	0.192946	0.543568	0.871369	0.989627	0.383817
0.388298	0.340426	0.271277	0.261333	0.210667	0.165333	0.007979	0.319149	0.510638	0.771277	1	0.005319	0.239362	0.473404	0.718085	0.992021	0.00266	0.18883	0.56117	0.74734	0.99734	0.523936	0.180851	0.295213	0.104	0.066667	0.002667	0.00266	0.337766	0.529255	0.792553	1	0.148936	0.582447	0.702128	0.784574	0.981383	0.007979	0.114362	0.255319	0.462766	0.885638	0.412234	0.336	0.010638	0.204787	0.569149	0.744681	0.99734	0.37766
0.350195	0.422179	0.227626	0.306043	0.17154	0.177388	0.005837	0.254864	0.59144	0.77821	1	0.003891	0.266537	0.511673	0.805447	0.996109	0.001946	0.177043	0.385214	0.568093	0.98249	0.651751	0.054475	0.293774	0.017544	0.060429	0.009747	0.001946	0.235409	0.614786	0.815175	1	0.054475	0.085603	0.099222	0.552529	0.957198	0.013619	0.27821	0.472763	0.571984	0.984436	0.507782	0.2846	0.009728	0.200389	0.424125	0.579767	0.98249	0.431907
0.373606	0.405204	0.22119	0.255121	0.148976	0.188082	0.005576	0.369888	0.635688	0.834572	1	0.003717	0.224907	0.39777	0.654275	0.994424	0.001859	0.159851	0.468401	0.684015	0.996283	0.546468	0.013011	0.44052	0.009311	0.083799	0.001862	0.001859	0.245353	0.3829	0.669145	1	0.420074	0.420074	0.942379	0.990706	0.994424	0.01487	0.169145	0.615242	0.765799	0.94052	0.381041	0.357542	0.013011	0.19145	0.477695	0.674721	0.996283	0.442379
0.322519	0.396947	0.280534	0.250478	0.195029	0.189293	0.007634	0.236641	0.492366	0.772901	1	0.003817	0.278626	0.498092	0.753817	0.996183	0.001908	0.167939	0.494275	0.711832	0.992366	0.471374	0.051527	0.477099	0.051625	0.086042	0.001912	0.001908	0.307252	0.597328	0.85687	1	0.007634	0.135496	0.316794	0.793893	0.89313	0.022901	0.196565	0.425573	0.635496	0.992366	0.425573	0.424474	0.009542	0.301527	0.507634	0.700382	0.992366	0.414122
0.388	0.466	0.146	0.380762	0.114228	0.116232	0.006	0.194	0.418	0.67	1	0.004	0.238	0.488	0.77	0.996	0.002	0.526	0.658	0.812	0.998	0.6	0.154	0.246	0.062124	0.058116	0.002004	0.002	0.292	0.514	0.802	1	0.192	0.396	0.592	0.786	0.88	0.026	0.12	0.364	0.628	0.852	0.36	0.336673	0.026	0.286	0.584	0.818	0.998	0.514
0.265659	0.462203	0.272138	0.207792	0.160173	0.233766	0.030238	0.278618	0.475162	0.639309	0.993521	0.00432	0.209503	0.50108	0.796976	0.99784	0.00216	0.304536	0.509719	0.742981	1	0.730022	0.079914	0.190065	0.034632	0.04329	0.004329	0.00216	0.205184	0.490281	0.794816	1	0.023758	0.159827	0.451404	0.529158	0.833693	0.220302	0.37149	0.557235	0.650108	0.948164	0.468683	0.341991	0.008639	0.263499	0.531317	0.799136	0.963283	0.475162
0.314168	0.471253	0.214579	0.265159	0.127441	0.197328	0.00308	0.341889	0.534908	0.778234	0.997947	0.002053	0.163244	0.36345	0.655031	0.991786	0.001027	0.408624	0.644764	0.808008	1	0.727926	0.090349	0.181725	0.033916	0.046249	0.003083	0.001027	0.186858	0.371663	0.565708	1	0.290554	0.678645	0.786448	0.867556	0.945585	0.00924	0.626283	0.734086	0.859343	0.977413	0.568789	0.343268	0.005133	0.183778	0.475359	0.727926	0.99076	0.511294
0.300173	0.473183	0.226644	0.231169	0.137662	0.227706	0.004325	0.345156	0.58737	0.799308	0.999135	0.00173	0.207612	0.372837	0.643599	0.991349	0.000865	0.360727	0.634948	0.803633	1	0.758651	0.08045	0.1609	0.029437	0.036364	0.001732	0.000865	0.200692	0.390138	0.579585	1	0.009516	0.705882	0.801038	0.872837	0.958478	0.079585	0.687716	0.787197	0.897924	0.987889	0.675606	0.245887	0.002595	0.219723	0.393599	0.690311	0.985294	0.525087
0.214953	0.649533	0.135514	0.253521	0.089202	0.131455	0.014019	0.135514	0.299065	0.626168	1	0.009346	0.369159	0.565421	0.733645	0.995327	0.004673	0.116822	0.257009	0.747664	0.976636	0.780374	0.163551	0.056075	0.084507	0.018779	0.00939	0.004673	0.378505	0.574766	0.794393	1	0.046729	0.079439	0.168224	0.280374	0.859813	0.009346	0.018692	0.17757	0.308411	0.32243	0.635514	0.319249	0.023364	0.359813	0.584112	0.761682	0.976636	0.668224
0.305195	0.467532	0.227273	0.286645	0.143322	0.205212	0.012987	0.211039	0.415584	0.701299	0.987013	0.006494	0.318182	0.61039	0.827922	1	0.003247	0.214286	0.376623	0.623377	0.957792	0.62013	0.090909	0.288961	0.035831	0.055375	0.009772	0.003247	0.285714	0.652597	0.844156	1	0.233766	0.253247	0.363636	0.477273	0.801948	0.029221	0.12013	0.415584	0.558442	0.75974	0.503247	0.345277	0.035714	0.301948	0.548701	0.821429	0.993506	0.477273
0.311828	0.365591	0.322581	0.23913	0.184783	0.195652	0.043011	0.16129	0.451613	0.774194	1	0.021505	0.268817	0.645161	0.817204	0.978495	0.010753	0.258065	0.408602	0.602151	0.892473	0.505376	0.333333	0.16129	0.108696	0.043478	0.021739	0.010753	0.247312	0.731183	0.870968	1	0.258065	0.365591	0.483871	0.591398	0.774194	0.032258	0.107527	0.150538	0.193548	0.655914	0.451613	0.304348	0.096774	0.290323	0.451613	0.634409	0.903226	0.387097
0.309577	0.447661	0.242762	0.261161	0.189732	0.178571	0.013363	0.200445	0.427617	0.697105	0.995546	0.008909	0.33853	0.565702	0.815145	1	0.002227	0.18931	0.365256	0.694878	0.997773	0.632517	0.160356	0.207127	0.060268	0.060268	0.002232	0.002227	0.298441	0.550111	0.790646	1	0.024499	0.135857	0.342984	0.708241	0.975501	0.053452	0.211581	0.423163	0.757238	0.993318	0.510022	0.334821	0.004454	0.267261	0.550111	0.806236	0.988864	0.432071
0.369034	0.441211	0.189756	0.257576	0.160839	0.131702	0.002328	0.202561	0.474971	0.696158	1	0.022119	0.291036	0.596042	0.85099	0.998836	0.001164	0.257276	0.423749	0.569267	0.973225	0.683353	0.126892	0.189756	0.052448	0.054779	0.003497	0.001164	0.252619	0.54482	0.827707	1	0.005821	0.301513	0.383003	0.445867	0.677532	0.004657	0.182771	0.537835	0.625146	0.963912	0.427241	0.328671	0.003492	0.307334	0.493597	0.718277	0.995343	0.434226
0.306261	0.423012	0.270728	0.250847	0.169492	0.186441	0.01692	0.203046	0.465313	0.736041	0.984772	0.003384	0.189509	0.482234	0.717428	0.998308	0.001692	0.341794	0.585448	0.780034	1	0.649746	0.189509	0.160745	0.067797	0.030508	0	0.001692	0.192893	0.519459	0.747885	1	0.05753	0.329949	0.489002	0.766497	0.99154	0.023689	0.287648	0.453469	0.741117	0.956007	0.467005	0.376271	0.023689	0.291032	0.519459	0.705584	0.994924	0.43824
0.428115	0.364217	0.207668	0.298077	0.189103	0.141026	0.01278	0.300319	0.635783	0.837061	0.996805	0.00639	0.246006	0.447284	0.626198	1	0.003195	0.146965	0.345048	0.642173	0.926518	0.635783	0.118211	0.246006	0.057692	0.051282	0	0.003195	0.313099	0.511182	0.821086	1	0.054313	0.140575	0.175719	0.261981	0.830671	0.095847	0.217252	0.629393	0.690096	0.923323	0.316294	0.333333	0.015974	0.175719	0.399361	0.495208	0.926518	0.434505
0.342672	0.418103	0.239224	0.306695	0.181425	0.168467	0.00431	0.200431	0.463362	0.719828	0.99569	0.006466	0.273707	0.579741	0.765086	0.997845	0.002155	0.232759	0.420259	0.726293	1	0.661638	0.157328	0.181034	0.069114	0.034557	0	0.002155	0.280172	0.545259	0.730603	1	0.017241	0.165948	0.344828	0.838362	0.943966	0.06681	0.224138	0.4375	0.885776	0.982759	0.493534	0.362851	0.021552	0.338362	0.549569	0.726293	0.980603	0.459052
0.440075	0.385768	0.174157	0.309568	0.150094	0.121951	0.007491	0.230337	0.511236	0.750936	1	0.003745	0.217228	0.501873	0.79588	0.996255	0.001873	0.314607	0.475655	0.64794	0.874532	0.646067	0.132959	0.220974	0.050657	0.058161	0.001876	0.001873	0.292135	0.64794	0.837079	1	0.144195	0.348315	0.428839	0.535581	0.743446	0.009363	0.080524	0.245318	0.486891	0.758427	0.477528	0.360225	0.014981	0.342697	0.638577	0.827715	0.994382	0.426966
0.353695	0.333005	0.3133	0.218935	0.229783	0.216963	0.00197	0.224631	0.493596	0.744828	1	0.011823	0.231527	0.454187	0.725123	0.99803	0.000985	0.28867	0.544828	0.776355	0.997044	0.44335	0.13202	0.424631	0.059172	0.086785	0.005917	0.000985	0.155665	0.359606	0.744828	1	0.025616	0.24335	0.545813	0.848276	0.990148	0.00197	0.400985	0.565517	0.712315	0.996059	0.504433	0.378698	0.003941	0.29064	0.539901	0.781281	0.997044	0.330049
0.43609	0.323308	0.240602	0.287879	0.189394	0.166667	0.015038	0.263158	0.548872	0.774436	1	0.037594	0.255639	0.488722	0.684211	0.992481	0.007519	0.150376	0.413534	0.691729	0.954887	0.421053	0.195489	0.383459	0.106061	0.060606	0.015152	0.007519	0.165414	0.383459	0.819549	1	0.075188	0.315789	0.443609	0.503759	0.654135	0.082707	0.210526	0.691729	0.789474	0.954887	0.353383	0.409091	0.067669	0.142857	0.323308	0.586466	0.954887	0.323308
0.3008	0.4096	0.2896	0.221154	0.182692	0.248397	0.0048	0.248	0.4576	0.7376	0.9888	0.0032	0.2304	0.4976	0.7456	1	0.0016	0.28	0.5472	0.7664	0.9952	0.536	0.1984	0.2656	0.060897	0.057692	0.003205	0.0016	0.1952	0.4224	0.7088	1	0.1152	0.3872	0.528	0.7712	0.9408	0.0608	0.3056	0.5616	0.7552	0.8944	0.4992	0.397436	0.008	0.2992	0.5344	0.7504	0.9952	0.4256
0.493056	0.25	0.256944	0.300699	0.216783	0.090909	0.020833	0.166667	0.465278	0.770833	0.993056	0.013889	0.25	0.555556	0.743056	0.9375	0.006944	0.326389	0.479167	0.638889	1	0.597222	0.3125	0.090278	0.111888	0.027972	0	0.006944	0.145833	0.520833	0.819444	1	0.159722	0.270833	0.402778	0.527778	0.798611	0.673611	0.6875	0.708333	0.729167	0.979167	0.375	0.335664	0.180556	0.340278	0.520833	0.659722	0.979167	0.354167
0.385768	0.35206	0.262172	0.263158	0.210526	0.229323	0.007491	0.220974	0.434457	0.737828	0.996255	0.011236	0.333333	0.610487	0.812734	1	0.003745	0.179775	0.40824	0.64794	0.985019	0.303371	0.265918	0.430712	0.075188	0.067669	0.007519	0.003745	0.134831	0.531835	0.76779	1	0.044944	0.138577	0.28839	0.794007	0.985019	0.161049	0.385768	0.509363	0.726592	0.93633	0.464419	0.473684	0.022472	0.2397	0.505618	0.722846	0.985019	0.430712
0.388679	0.260377	0.350943	0.185606	0.333333	0.17803	0.007547	0.275472	0.490566	0.762264	1	0.033962	0.192453	0.543396	0.792453	0.973585	0.003774	0.25283	0.467925	0.690566	0.992453	0.309434	0.264151	0.426415	0.068182	0.060606	0.007576	0.003774	0.132075	0.498113	0.713208	1	0.05283	0.14717	0.29434	0.807547	0.988679	0.166038	0.396226	0.520755	0.739623	0.954717	0.475472	0.469697	0.011321	0.245283	0.509434	0.732075	0.981132	0.25283
0.351171	0.392977	0.255853	0.234506	0.20268	0.201005	0.003344	0.22408	0.466555	0.759197	1	0.008361	0.29097	0.5301	0.744147	0.994983	0.001672	0.207358	0.493311	0.729097	0.988294	0.525084	0.22408	0.250836	0.092127	0.045226	0.001675	0.001672	0.282609	0.538462	0.747492	1	0.005017	0.204013	0.468227	0.704013	0.906355	0.025084	0.217391	0.505017	0.780936	0.939799	0.436455	0.38861	0.006689	0.252508	0.510033	0.72408	0.989967	0.391304
0.410156	0.320312	0.269531	0.25098	0.239216	0.188235	0.023438	0.265625	0.535156	0.722656	1	0.007812	0.183594	0.453125	0.691406	0.996094	0.003906	0.230469	0.523438	0.792969	0.980469	0.5625	0.28125	0.15625	0.109804	0.054902	0	0.003906	0.277344	0.523438	0.664062	1	0.027344	0.191406	0.464844	0.8125	0.980469	0.054688	0.261719	0.433594	0.886719	0.925781	0.335938	0.345098	0.015625	0.328125	0.539062	0.789062	0.980469	0.386719
0.390071	0.37234	0.237589	0.245552	0.206406	0.19573	0.01773	0.241135	0.478723	0.765957	1	0.007092	0.280142	0.510638	0.670213	0.992908	0.003546	0.202128	0.475177	0.783688	0.98227	0.539007	0.280142	0.180851	0.092527	0.049822	0	0.003546	0.265957	0.496454	0.680851	1	0.08156	0.184397	0.453901	0.826241	0.985816	0.223404	0.386525	0.567376	0.787234	0.929078	0.379433	0.298932	0.031915	0.322695	0.570922	0.808511	0.98227	0.439716
0.386861	0.357664	0.255474	0.245421	0.212454	0.194139	0.010949	0.222628	0.489051	0.733577	1	0.007299	0.244526	0.514599	0.656934	0.985401	0.00365	0.259124	0.474453	0.79562	0.992701	0.594891	0.259124	0.145985	0.080586	0.058608	0	0.00365	0.310219	0.50365	0.671533	1	0.032847	0.127737	0.30292	0.813869	0.978102	0.171533	0.354015	0.620438	0.886861	0.923358	0.368613	0.336996	0.014599	0.277372	0.474453	0.773723	0.974453	0.379562
0.372236	0.347666	0.280098	0.253383	0.212792	0.186962	0.002457	0.244472	0.493857	0.79484	1	0.004914	0.146192	0.416462	0.681818	0.996314	0.001229	0.371007	0.587224	0.771499	0.995086	0.514742	0.293612	0.191646	0.105781	0.04428	0	0.001229	0.157248	0.384521	0.65602	1	0.070025	0.457002	0.604423	0.739558	0.993857	0.004914	0.212531	0.363636	0.925061	0.985258	0.472973	0.378844	0.004914	0.359951	0.54914	0.753071	0.995086	0.388206
0.357441	0.336579	0.305981	0.207521	0.228412	0.221448	0.004172	0.250348	0.553547	0.84701	1	0.002782	0.264256	0.45758	0.698192	0.997218	0.001391	0.226704	0.49096	0.724618	0.993046	0.485396	0.32267	0.191933	0.125348	0.033426	0.005571	0.001391	0.216968	0.433936	0.67733	1	0.005563	0.357441	0.543811	0.685675	0.988873	0.009736	0.166898	0.860918	0.909597	0.995828	0.50765	0.401114	0.006954	0.268428	0.488178	0.724618	0.990264	0.360223
0.360419	0.323722	0.315858	0.206037	0.254593	0.206037	0.002621	0.231979	0.516383	0.777195	1	0.007864	0.292267	0.503277	0.739187	0.993447	0.001311	0.229358	0.46789	0.712975	0.998689	0.504587	0.290957	0.204456	0.112861	0.044619	0.002625	0.001311	0.235911	0.441678	0.68152	1	0.048493	0.357798	0.551769	0.685452	0.865007	0.007864	0.134993	0.879423	0.933159	0.997379	0.495413	0.383202	0.005242	0.267366	0.491481	0.722149	0.993447	0.346003
0.444444	0.261111	0.294444	0.256983	0.307263	0.122905	0.011111	0.25	0.494444	0.738889	1	0.016667	0.194444	0.394444	0.688889	0.977778	0.005556	0.283333	0.533333	0.788889	0.966667	0.383333	0.283333	0.333333	0.094972	0.050279	0.01676	0.005556	0.116667	0.466667	0.727778	1	0.083333	0.211111	0.516667	0.866667	0.972222	0.088889	0.394444	0.588889	0.766667	0.911111	0.427778	0.435754	0.083333	0.283333	0.544444	0.761111	0.977778	0.283333
0.348985	0.376904	0.274112	0.222363	0.212198	0.184244	0.005076	0.21066	0.430203	0.663706	0.994924	0.002538	0.248731	0.590102	0.760152	0.998731	0.001269	0.30203	0.497462	0.800761	1	0.534264	0.025381	0.440355	0.012706	0.071156	0.005083	0.001269	0.190355	0.527919	0.69797	1	0.008883	0.040609	0.130711	0.142132	0.988579	0.034264	0.335025	0.497462	0.854061	0.994924	0.461929	0.376112	0.006345	0.313452	0.545685	0.734772	0.997462	0.42132
0.364706	0.308235	0.327059	0.209906	0.259434	0.186321	0.004706	0.244706	0.505882	0.734118	1	0.011765	0.211765	0.416471	0.769412	0.995294	0.002353	0.263529	0.508235	0.741176	0.997647	0.425882	0.167059	0.407059	0.061321	0.080189	0.004717	0.002353	0.141176	0.416471	0.738824	1	0.183529	0.381176	0.6	0.811765	0.931765	0.023529	0.282353	0.529412	0.724706	0.990588	0.569412	0.358491	0.009412	0.258824	0.470588	0.748235	0.992941	0.345882
0.459902	0.418985	0.121113	0.340984	0.106557	0.108197	0.00982	0.304419	0.513912	0.734861	1	0.003273	0.230769	0.518822	0.780687	0.998363	0.001637	0.162029	0.263502	0.621931	0.978723	0.783961	0.06874	0.1473	0.027869	0.040984	0.001639	0.001637	0.296236	0.492635	0.779051	1	0.022913	0.198036	0.230769	0.584288	0.978723	0.00491	0.242226	0.623568	0.679214	0.968903	0.343699	0.288525	0.008183	0.168576	0.343699	0.494272	0.978723	0.500818
0.428899	0.376147	0.194954	0.289655	0.195402	0.142529	0.011468	0.316514	0.582569	0.81422	1	0.004587	0.213303	0.465596	0.694954	0.995413	0.002294	0.21789	0.369266	0.619266	0.993119	0.798165	0.084862	0.116972	0.034483	0.057471	0.006897	0.002294	0.224771	0.516055	0.729358	1	0.018349	0.305046	0.401376	0.598624	0.993119	0.029817	0.272936	0.369266	0.87844	0.951835	0.380734	0.372414	0.018349	0.18578	0.348624	0.571101	0.993119	0.451835
0.391837	0.338776	0.269388	0.22541	0.20082	0.147541	0.008163	0.142857	0.432653	0.722449	0.991837	0.028571	0.244898	0.428571	0.759184	1	0.004082	0.412245	0.620408	0.746939	0.995918	0.563265	0.216327	0.220408	0.057377	0.04918	0.008197	0.004082	0.15102	0.318367	0.718367	1	0.244898	0.359184	0.559184	0.738776	0.959184	0.020408	0.395918	0.608163	0.783673	0.902041	0.432653	0.319672	0.020408	0.37551	0.555102	0.706122	0.987755	0.363265
0.330645	0.383065	0.28629	0.210526	0.202429	0.174089	0.028226	0.225806	0.471774	0.689516	0.955645	0.008065	0.254032	0.58871	0.879032	1	0.004032	0.233871	0.439516	0.608871	0.887097	0.53629	0.21371	0.25	0.048583	0.05668	0.016194	0.004032	0.193548	0.483871	0.862903	1	0.133065	0.225806	0.362903	0.604839	0.858871	0.104839	0.28629	0.520161	0.693548	0.806452	0.395161	0.331984	0.096774	0.28629	0.504032	0.645161	0.975806	0.423387
0.316964	0.379464	0.303571	0.215247	0.188341	0.273543	0.035714	0.1875	0.522321	0.763393	0.995536	0.008929	0.227679	0.441964	0.727679	1	0.004464	0.272321	0.508929	0.732143	0.96875	0.598214	0.147321	0.254464	0.044843	0.053812	0	0.004464	0.147321	0.361607	0.598214	1	0.236607	0.5625	0.732143	0.785714	0.9375	0.299107	0.388393	0.625	0.6875	0.955357	0.441964	0.313901	0.102679	0.379464	0.5625	0.732143	0.982143	0.361607
0.341667	0.308333	0.35	0.205021	0.246862	0.205021	0.008333	0.254167	0.475	0.745833	0.9875	0.029167	0.2	0.483333	0.795833	0.991667	0.004167	0.245833	0.525	0.725	1	0.491667	0.2875	0.220833	0.07113	0.054393	0.012552	0.004167	0.179167	0.470833	0.829167	1	0.016667	0.2125	0.329167	0.683333	0.983333	0.283333	0.391667	0.6	0.770833	0.925	0.45	0.32636	0.020833	0.320833	0.525	0.7	0.995833	0.354167
0.371324	0.341912	0.286765	0.317343	0.199262	0.225092	0.007353	0.202206	0.448529	0.764706	0.996324	0.011029	0.316176	0.573529	0.753676	1	0.003676	0.231618	0.452206	0.694853	0.981618	0.636029	0.117647	0.246324	0.055351	0.055351	0.00369	0.003676	0.1875	0.477941	0.764706	1	0.110294	0.4375	0.580882	0.731618	0.919118	0.136029	0.238971	0.481618	0.544118	0.911765	0.496324	0.383764	0.029412	0.268382	0.507353	0.705882	0.981618	0.360294
0.362934	0.378378	0.258687	0.290698	0.197674	0.158915	0.007722	0.23166	0.517375	0.76834	0.980695	0.011583	0.181467	0.382239	0.710425	0.996139	0.003861	0.355212	0.606178	0.752896	1	0.571429	0.196911	0.23166	0.046512	0.069767	0.015504	0.003861	0.146718	0.305019	0.633205	1	0.316602	0.401544	0.532819	0.756757	0.996139	0.023166	0.459459	0.671815	0.837838	0.942085	0.42471	0.317829	0.019305	0.3861	0.563707	0.737452	0.992278	0.409266
0.352113	0.347418	0.300469	0.264151	0.226415	0.216981	0.018779	0.253521	0.497653	0.737089	0.976526	0.00939	0.220657	0.478873	0.769953	0.995305	0.004695	0.2723	0.488263	0.723005	1	0.525822	0.230047	0.244131	0.056604	0.056604	0.009434	0.004695	0.140845	0.41784	0.680751	1	0.201878	0.314554	0.539906	0.737089	0.929577	0.122066	0.366197	0.624413	0.830986	0.953052	0.441315	0.339623	0.164319	0.361502	0.558685	0.723005	0.948357	0.384977
0.42542	0.383403	0.191176	0.304942	0.171399	0.117771	0.003151	0.257353	0.490546	0.727941	1	0.002101	0.189076	0.442227	0.726891	0.995798	0.00105	0.387605	0.644958	0.790966	0.992647	0.744748	0.005252	0.25	0.004206	0.052576	0	0.00105	0.203782	0.391807	0.598739	1	0.084034	0.084034	0.085084	0.504202	0.506303	0.012605	0.656513	0.752101	0.828782	0.991597	0.281513	0.271293	0.039916	0.481092	0.671218	0.82563	0.992647	0.401261
0.31069	0.486637	0.202673	0.270903	0.136009	0.16165	0.002227	0.202673	0.435412	0.667038	1	0.003341	0.357461	0.64922	0.835189	0.998886	0.001114	0.167038	0.309577	0.514477	0.994432	0.683742	0.08686	0.229399	0.037904	0.037904	0.00223	0.001114	0.387528	0.636971	0.827394	1	0.005568	0.115813	0.188196	0.492205	0.875278	0.02784	0.150334	0.280624	0.430958	0.654788	0.518931	0.309922	0.004454	0.262806	0.514477	0.761693	0.998886	0.466592
0.363333	0.325	0.311667	0.198664	0.237062	0.215359	0.005	0.233333	0.5	0.793333	1	0.013333	0.291667	0.51	0.771667	0.998333	0.001667	0.23	0.461667	0.675	0.996667	0.506667	0.143333	0.35	0.0601	0.106845	0.006678	0.001667	0.286667	0.53	0.775	1	0.048333	0.173333	0.578333	0.728333	0.945	0.006667	0.233333	0.393333	0.651667	0.996667	0.488333	0.404007	0.01	0.236667	0.515	0.725	0.995	0.326667
0.391304	0.271739	0.336957	0.191257	0.300546	0.174863	0.016304	0.206522	0.375	0.744565	0.994565	0.043478	0.358696	0.554348	0.733696	1	0.005435	0.184783	0.532609	0.73913	0.98913	0.347826	0.086957	0.565217	0.054645	0.087432	0	0.005435	0.211957	0.505435	0.836957	1	0.119565	0.75	0.798913	0.820652	0.869565	0.01087	0.244565	0.418478	0.625	0.945652	0.445652	0.502732	0.027174	0.266304	0.516304	0.690217	0.978261	0.304348
0.282451	0.390447	0.327103	0.205821	0.199584	0.279626	0.002077	0.224299	0.476636	0.739356	0.997923	0.003115	0.283489	0.537902	0.779855	1	0.001038	0.253375	0.477674	0.724818	0.998962	0.47352	0.166147	0.360332	0.076923	0.087318	0.008316	0.001038	0.279335	0.556594	0.760125	1	0.022845	0.274143	0.507788	0.773624	0.976116	0.010384	0.226376	0.418484	0.701973	0.997923	0.615784	0.365904	0.003115	0.262721	0.477674	0.751817	0.998962	0.407061
0.425676	0.310811	0.263514	0.265306	0.190476	0.210884	0.013514	0.202703	0.540541	0.810811	1	0.094595	0.22973	0.47973	0.682432	0.993243	0.006757	0.236486	0.412162	0.689189	0.952703	0.547297	0.22973	0.222973	0.108844	0.040816	0	0.006757	0.175676	0.459459	0.763514	1	0.040541	0.222973	0.425676	0.648649	0.858108	0.297297	0.344595	0.587838	0.912162	0.972973	0.344595	0.367347	0.027027	0.256757	0.439189	0.621622	0.959459	0.304054
0.385802	0.322531	0.291667	0.230294	0.224111	0.157651	0.003086	0.180556	0.395062	0.692901	0.99537	0.007716	0.287037	0.555556	0.790123	1	0.001543	0.337963	0.552469	0.774691	0.996914	0.342593	0.037037	0.62037	0.018547	0.092736	0.006182	0.001543	0.097222	0.291667	0.728395	1	0.009259	0.061728	0.438272	0.455247	0.859568	0.100309	0.353395	0.554012	0.753086	0.996914	0.472222	0.36476	0.013889	0.373457	0.569444	0.782407	0.996914	0.330247
0.430446	0.301837	0.267717	0.234211	0.2	0.192105	0.018373	0.278215	0.593176	0.800525	1	0.005249	0.186352	0.469816	0.71916	0.976378	0.002625	0.265092	0.451444	0.627297	0.971129	0.430446	0.094488	0.475066	0.044737	0.102632	0.002632	0.002625	0.115486	0.39895	0.700787	1	0.086614	0.24147	0.372703	0.48294	0.687664	0.12336	0.354331	0.587927	0.800525	0.992126	0.362205	0.342105	0.089239	0.270341	0.427822	0.56168	0.971129	0.32021
0.333333	0.350877	0.315789	0.228873	0.257042	0.211268	0.010526	0.242105	0.487719	0.789474	0.996491	0.007018	0.2	0.505263	0.698246	1	0.003509	0.273684	0.491228	0.729825	0.989474	0.385965	0.17193	0.442105	0.049296	0.091549	0	0.003509	0.217544	0.452632	0.701754	1	0.150877	0.308772	0.438596	0.642105	0.733333	0.007018	0.252632	0.526316	0.82807	0.992982	0.526316	0.380282	0.014035	0.245614	0.487719	0.680702	0.989474	0.364912
0.277978	0.415162	0.306859	0.210145	0.166667	0.257246	0.025271	0.202166	0.512635	0.758123	0.99639	0.00722	0.245487	0.458484	0.700361	1	0.00361	0.281588	0.505415	0.740072	0.99278	0.422383	0.169675	0.407942	0.050725	0.072464	0	0.00361	0.184116	0.429603	0.700361	1	0.216606	0.314079	0.447653	0.65343	0.743682	0.054152	0.270758	0.537906	0.833935	0.99278	0.541516	0.376812	0.061372	0.285199	0.490975	0.689531	0.99278	0.436823
0.285211	0.419014	0.295775	0.226148	0.169611	0.250883	0.010563	0.21831	0.447183	0.757042	0.989437	0.007042	0.239437	0.475352	0.760563	1	0.003521	0.257042	0.507042	0.721831	0.996479	0.390845	0.172535	0.43662	0.04947	0.09894	0	0.003521	0.190141	0.454225	0.704225	1	0.169014	0.323944	0.443662	0.644366	0.735915	0.021127	0.232394	0.528169	0.834507	0.996479	0.538732	0.416961	0.017606	0.235915	0.475352	0.661972	0.996479	0.457746
0.350746	0.264925	0.384328	0.168539	0.265918	0.202247	0.018657	0.242537	0.503731	0.742537	0.992537	0.007463	0.186567	0.414179	0.664179	1	0.003731	0.291045	0.570896	0.779851	0.996269	0.380597	0.175373	0.44403	0.052434	0.097378	0	0.003731	0.156716	0.455224	0.675373	1	0.126866	0.287313	0.395522	0.608209	0.701493	0.022388	0.253731	0.507463	0.824627	0.988806	0.552239	0.419476	0.018657	0.238806	0.477612	0.679104	0.996269	0.257463
0.343066	0.313869	0.343066	0.172161	0.234432	0.245421	0.018248	0.244526	0.521898	0.751825	1	0.007299	0.211679	0.492701	0.693431	0.992701	0.00365	0.248175	0.489051	0.737226	0.99635	0.40146	0.175182	0.423358	0.051282	0.087912	0	0.00365	0.20073	0.474453	0.722628	1	0.175182	0.324818	0.412409	0.624088	0.715328	0.018248	0.229927	0.510949	0.813869	0.989051	0.536496	0.432234	0.029197	0.255474	0.478102	0.678832	0.989051	0.324818
0.354015	0.237226	0.408759	0.135531	0.315018	0.179487	0.007299	0.218978	0.492701	0.79562	1	0.029197	0.29562	0.562044	0.726277	0.952555	0.00365	0.233577	0.448905	0.70438	0.99635	0.39781	0.178832	0.423358	0.051282	0.10989	0	0.00365	0.211679	0.463504	0.718978	1	0.142336	0.30292	0.39781	0.609489	0.70438	0.010949	0.255474	0.507299	0.813869	0.981752	0.540146	0.410256	0.029197	0.240876	0.478102	0.675182	0.99635	0.226277
0.298969	0.357388	0.343643	0.213793	0.22069	0.241379	0.006873	0.268041	0.542955	0.783505	0.996564	0.017182	0.230241	0.47079	0.707904	0.993127	0.003436	0.243986	0.484536	0.725086	1	0.388316	0.168385	0.443299	0.048276	0.110345	0	0.003436	0.19244	0.450172	0.694158	1	0.168385	0.323024	0.439863	0.639175	0.728522	0.020619	0.230241	0.52921	0.824742	0.986254	0.546392	0.406897	0.010309	0.243986	0.477663	0.676976	0.982818	0.347079
0.302817	0.341549	0.355634	0.201413	0.215548	0.275618	0.017606	0.285211	0.507042	0.778169	0.996479	0.007042	0.228873	0.475352	0.711268	1	0.003521	0.232394	0.485915	0.725352	0.992958	0.415493	0.151408	0.433099	0.042403	0.091873	0	0.003521	0.179577	0.419014	0.690141	1	0.193662	0.285211	0.605634	0.644366	0.728873	0.045775	0.253521	0.528169	0.830986	0.992958	0.556338	0.424028	0.010563	0.235915	0.475352	0.679577	0.985915	0.352113
0.372093	0.318937	0.30897	0.213333	0.25	0.206667	0.006645	0.245847	0.551495	0.813953	1	0.019934	0.242525	0.498339	0.700997	0.990033	0.003322	0.249169	0.458472	0.684385	0.996678	0.458472	0.162791	0.378738	0.046667	0.093333	0	0.003322	0.225914	0.581395	0.833887	1	0.13289	0.282392	0.365449	0.55814	0.644518	0.016611	0.242525	0.468439	0.740864	0.960133	0.495017	0.38	0.0299	0.222591	0.438538	0.624585	0.986711	0.335548
0.316456	0.386076	0.297468	0.196825	0.231746	0.222222	0.009494	0.170886	0.490506	0.772152	1	0.03481	0.287975	0.550633	0.731013	0.993671	0.003165	0.221519	0.455696	0.667722	0.996835	0.392405	0.155063	0.452532	0.044444	0.088889	0	0.003165	0.170886	0.43038	0.686709	1	0.174051	0.329114	0.414557	0.598101	0.68038	0.037975	0.272152	0.522152	0.835443	0.993671	0.541139	0.412698	0.015823	0.253165	0.493671	0.702532	0.996835	0.427215
0.278351	0.378007	0.343643	0.224138	0.182759	0.244828	0.006873	0.250859	0.487973	0.766323	0.993127	0.017182	0.223368	0.477663	0.731959	0.996564	0.003436	0.257732	0.525773	0.745704	1	0.398625	0.168385	0.43299	0.048276	0.096552	0	0.003436	0.182131	0.429553	0.701031	1	0.202749	0.357388	0.443299	0.635739	0.725086	0.054983	0.257732	0.536082	0.821306	0.986254	0.532646	0.406897	0.041237	0.278351	0.484536	0.683849	0.982818	0.381443
0.330935	0.334532	0.334532	0.184116	0.231047	0.227437	0.007194	0.244604	0.521583	0.773381	1	0.014388	0.21223	0.535971	0.730216	0.978417	0.003597	0.258993	0.460432	0.705036	0.996403	0.363309	0.169065	0.467626	0.050542	0.101083	0	0.003597	0.201439	0.442446	0.719424	1	0.169065	0.266187	0.417266	0.625899	0.715827	0.007194	0.223022	0.507194	0.820144	0.992806	0.546763	0.404332	0.014388	0.251799	0.464029	0.672662	0.996403	0.363309
0.338983	0.345763	0.315254	0.221088	0.183673	0.248299	0.020339	0.257627	0.518644	0.779661	1	0.00678	0.213559	0.481356	0.701695	0.99322	0.00339	0.267797	0.491525	0.732203	0.983051	0.386441	0.166102	0.447458	0.047619	0.108844	0	0.00339	0.189831	0.464407	0.701695	1	0.159322	0.311864	0.4	0.59661	0.684746	0.013559	0.257627	0.505085	0.80339	0.979661	0.535593	0.408163	0.023729	0.240678	0.454237	0.657627	0.983051	0.349153
0.42803	0.238636	0.333333	0.159696	0.277567	0.1673	0.007576	0.231061	0.477273	0.757576	1	0.018939	0.287879	0.537879	0.685606	0.996212	0.003788	0.234848	0.492424	0.761364	0.988636	0.378788	0.181818	0.439394	0.053232	0.098859	0	0.003788	0.166667	0.420455	0.715909	1	0.132576	0.30303	0.393939	0.609848	0.704545	0.026515	0.261364	0.511364	0.82197	0.988636	0.549242	0.410646	0.011364	0.234848	0.450758	0.651515	0.988636	0.253788
0.257426	0.445545	0.29703	0.18543	0.188742	0.251656	0.013201	0.29703	0.50495	0.815182	1	0.006601	0.20132	0.465347	0.722772	0.9967	0.0033	0.267327	0.524752	0.716172	0.990099	0.442244	0.171617	0.386139	0.05298	0.086093	0	0.0033	0.148515	0.425743	0.712871	1	0.026403	0.339934	0.481848	0.676568	0.762376	0.115512	0.306931	0.570957	0.848185	0.993399	0.521452	0.423841	0.023102	0.287129	0.50495	0.686469	0.986799	0.471947
0.293919	0.412162	0.293919	0.237288	0.166102	0.230508	0.010135	0.182432	0.5	0.780405	1	0.006757	0.243243	0.513514	0.72973	0.996622	0.003378	0.280405	0.476351	0.712838	0.97973	0.415541	0.162162	0.422297	0.047458	0.074576	0	0.003378	0.138514	0.425676	0.692568	1	0.226351	0.388514	0.456081	0.641892	0.726351	0.081081	0.283784	0.540541	0.831081	0.989865	0.533784	0.40678	0.013514	0.263514	0.489865	0.679054	0.983108	0.493243
0.360424	0.286219	0.353357	0.205674	0.241135	0.202128	0.007067	0.24735	0.526502	0.812721	0.992933	0.014134	0.279152	0.512367	0.731449	1	0.003534	0.226148	0.459364	0.696113	0.968198	0.409894	0.176678	0.413428	0.06383	0.092199	0	0.003534	0.190813	0.44523	0.696113	1	0.123675	0.289753	0.540636	0.583039	0.975265	0.024735	0.243816	0.4947	0.787986	0.939929	0.551237	0.397163	0.014134	0.229682	0.466431	0.664311	0.992933	0.286219
0.332103	0.306273	0.361624	0.185185	0.244444	0.240741	0.01845	0.258303	0.479705	0.774908	0.99631	0.01476	0.228782	0.546125	0.719557	1	0.00369	0.217712	0.461255	0.715867	0.99262	0.350554	0.177122	0.472325	0.051852	0.088889	0	0.00369	0.151292	0.383764	0.634686	1	0.121771	0.295203	0.369004	0.568266	0.660517	0.01845	0.258303	0.704797	0.826568	0.99262	0.542435	0.407407	0.01476	0.217712	0.461255	0.649446	0.98893	0.335793
0.357143	0.295918	0.346939	0.201365	0.238908	0.228669	0.010204	0.27551	0.520408	0.778912	1	0.006803	0.214286	0.486395	0.690476	0.996599	0.003401	0.238095	0.493197	0.734694	0.989796	0.387755	0.166667	0.445578	0.047782	0.095563	0	0.003401	0.173469	0.442177	0.707483	1	0.180272	0.357143	0.455782	0.653061	0.741497	0.034014	0.241497	0.534014	0.833333	0.993197	0.540816	0.395904	0.02381	0.255102	0.486395	0.676871	0.989796	0.326531
0.300781	0.355469	0.34375	0.203922	0.211765	0.254902	0.007812	0.226562	0.507812	0.773438	0.988281	0.011719	0.273438	0.519531	0.710938	1	0.003906	0.234375	0.453125	0.71875	0.992188	0.398438	0.1875	0.414062	0.054902	0.078431	0	0.003906	0.222656	0.519531	0.714844	1	0.113281	0.300781	0.378906	0.597656	0.695312	0.011719	0.242188	0.496094	0.8125	0.992188	0.550781	0.4	0.019531	0.222656	0.464844	0.664062	0.992188	0.390625
0.410909	0.250909	0.338182	0.222628	0.30292	0.164234	0.010909	0.250909	0.516364	0.796364	0.996364	0.014545	0.247273	0.505455	0.636364	0.992727	0.003636	0.218182	0.447273	0.734545	1	0.370909	0.174545	0.454545	0.051095	0.080292	0	0.003636	0.189091	0.425455	0.672727	1	0.12	0.283636	0.363636	0.567273	0.658182	0.021818	0.254545	0.698182	0.821818	0.985455	0.545455	0.408759	0.029091	0.232727	0.454545	0.654545	0.978182	0.261818
0.356877	0.27881	0.364312	0.179104	0.253731	0.19403	0.01487	0.219331	0.449814	0.743494	0.992565	0.05948	0.263941	0.513011	0.750929	0.988848	0.003717	0.241636	0.509294	0.728625	1	0.35316	0.182156	0.464684	0.052239	0.097015	0	0.003717	0.167286	0.416357	0.695167	1	0.171004	0.330855	0.431227	0.635688	0.732342	0.01487	0.237918	0.524164	0.825279	0.996283	0.550186	0.425373	0.011152	0.256506	0.472119	0.680297	0.98513	0.282528
0.401544	0.216216	0.382239	0.162791	0.302326	0.170543	0.007722	0.23166	0.46332	0.752896	0.992278	0.015444	0.339768	0.552124	0.683398	0.980695	0.003861	0.250965	0.486486	0.764479	1	0.389961	0.185328	0.42471	0.054264	0.093023	0	0.003861	0.158301	0.409266	0.675676	1	0.135135	0.305019	0.3861	0.610039	0.706564	0.030888	0.262548	0.517375	0.830116	0.988417	0.548263	0.44186	0.015444	0.23166	0.474903	0.675676	0.980695	0.235521
0.319392	0.319392	0.361217	0.183206	0.248092	0.236641	0.007605	0.258555	0.520913	0.78327	1	0.011407	0.212928	0.441065	0.730038	0.992395	0.003802	0.26616	0.490494	0.722433	0.980989	0.368821	0.18251	0.448669	0.053435	0.091603	0	0.003802	0.159696	0.406844	0.669202	1	0.13308	0.30038	0.395437	0.608365	0.703422	0.030418	0.26616	0.520913	0.825095	0.988593	0.562738	0.412214	0.015209	0.235741	0.467681	0.673004	0.980989	0.323194
0.328244	0.332061	0.339695	0.187739	0.214559	0.226054	0.007634	0.244275	0.515267	0.767176	1	0.015267	0.206107	0.431298	0.71374	0.98855	0.003817	0.263359	0.48855	0.721374	0.996183	0.381679	0.187023	0.431298	0.05364	0.099617	0	0.003817	0.20229	0.423664	0.683206	1	0.125954	0.301527	0.39313	0.614504	0.71374	0.022901	0.255725	0.515267	0.832061	0.992366	0.553435	0.40613	0.030534	0.225191	0.442748	0.641221	0.98855	0.335878
0.290909	0.384848	0.324242	0.203647	0.221884	0.221884	0.009091	0.242424	0.445455	0.736364	0.981818	0.012121	0.272727	0.478788	0.748485	0.99697	0.00303	0.221212	0.551515	0.760606	1	0.369697	0.160606	0.469697	0.045593	0.100304	0.00304	0.00303	0.215152	0.50303	0.745455	1	0.154545	0.284848	0.521212	0.70303	0.784848	0.015152	0.245455	0.487879	0.833333	0.990909	0.518182	0.401216	0.021212	0.236364	0.527273	0.69697	0.984848	0.381818
0.345638	0.295302	0.35906	0.198653	0.259259	0.239057	0.013423	0.234899	0.432886	0.758389	0.989933	0.026846	0.244966	0.567114	0.738255	0.996644	0.003356	0.241611	0.483221	0.721477	1	0.392617	0.157718	0.449664	0.057239	0.117845	0.003367	0.003356	0.174497	0.419463	0.684564	1	0.010067	0.268456	0.442953	0.637584	0.721477	0.026846	0.298658	0.536913	0.828859	0.989933	0.54698	0.397306	0.006711	0.244966	0.473154	0.671141	0.983221	0.332215
0.37276	0.286738	0.340502	0.21223	0.284173	0.194245	0.007168	0.232975	0.523297	0.781362	0.996416	0.010753	0.240143	0.433692	0.65233	1	0.003584	0.275986	0.526882	0.763441	0.989247	0.397849	0.172043	0.430108	0.05036	0.086331	0	0.003584	0.146953	0.430108	0.702509	1	0.222222	0.383513	0.458781	0.659498	0.749104	0.028674	0.272401	0.544803	0.83871	0.989247	0.55914	0.438849	0.010753	0.25448	0.480287	0.673835	0.989247	0.322581
0.397112	0.212996	0.389892	0.173913	0.344203	0.137681	0.00722	0.231047	0.516245	0.779783	1	0.01444	0.234657	0.458484	0.67509	0.98917	0.00361	0.249097	0.494585	0.765343	0.99278	0.379061	0.176895	0.444043	0.057971	0.101449	0	0.00361	0.187726	0.447653	0.703971	1	0.090253	0.32491	0.436823	0.642599	0.736462	0.01083	0.270758	0.523466	0.830325	0.99278	0.552347	0.391304	0.021661	0.249097	0.476534	0.66065	0.99278	0.216606
0.354198	0.377099	0.268702	0.25841	0.174312	0.200306	0.00458	0.224427	0.509924	0.8	1	0.003053	0.250382	0.471756	0.731298	0.993893	0.001527	0.265649	0.517557	0.708397	0.99542	0.523664	0.158779	0.317557	0.061162	0.058104	0.003058	0.001527	0.251908	0.505344	0.763359	1	0.045802	0.265649	0.473282	0.570992	0.874809	0.061069	0.244275	0.552672	0.824427	0.99542	0.448855	0.357798	0.019847	0.244275	0.526718	0.70687	0.99542	0.410687
0.375	0.367857	0.257143	0.275492	0.198569	0.168157	0.010714	0.225	0.492857	0.783929	1	0.003571	0.264286	0.503571	0.746429	0.998214	0.001786	0.25	0.491071	0.710714	0.996429	0.535714	0.146429	0.317857	0.062612	0.069767	0.005367	0.001786	0.219643	0.507143	0.751786	1	0.044643	0.401786	0.475	0.605357	0.991071	0.023214	0.257143	0.432143	0.785714	0.985714	0.441071	0.36136	0.007143	0.235714	0.516071	0.694643	0.996429	0.382143
0.352554	0.31631	0.331137	0.19637	0.239274	0.219472	0.003295	0.265239	0.518946	0.818781	0.998353	0.016474	0.243822	0.500824	0.708402	0.99341	0.001647	0.230643	0.469522	0.705107	1	0.490939	0.169687	0.339374	0.061056	0.064356	0.00495	0.001647	0.248764	0.52883	0.759473	1	0.031301	0.23888	0.444811	0.546952	0.869852	0.008237	0.261944	0.589786	0.820428	0.996705	0.439868	0.333333	0.011532	0.217463	0.500824	0.688633	0.995058	0.350906
0.37265	0.321368	0.305983	0.22774	0.239726	0.190068	0.003419	0.232479	0.482051	0.777778	1	0.008547	0.271795	0.528205	0.757265	0.998291	0.001709	0.22906	0.480342	0.702564	0.989744	0.494017	0.176068	0.329915	0.063356	0.070205	0.005137	0.001709	0.213675	0.475214	0.764103	1	0.042735	0.25812	0.452991	0.564103	0.704274	0.05812	0.283761	0.622222	0.837607	0.996581	0.466667	0.363014	0.006838	0.247863	0.488889	0.697436	0.996581	0.353846
0.388704	0.303987	0.307309	0.219634	0.242928	0.1797	0.003322	0.275748	0.516611	0.795681	0.998339	0.004983	0.237542	0.503322	0.715947	0.993355	0.001661	0.217608	0.453488	0.717608	1	0.503322	0.181063	0.315615	0.071547	0.058236	0.001664	0.001661	0.260797	0.538206	0.770764	1	0.038206	0.164452	0.475083	0.60299	0.976744	0.066445	0.249169	0.430233	0.807309	0.975083	0.501661	0.339434	0.006645	0.222591	0.465116	0.709302	0.996678	0.322259
0.488318	0.285047	0.226636	0.29274	0.234192	0.100703	0.007009	0.259346	0.495327	0.754673	1	0.004673	0.273364	0.586449	0.829439	0.995327	0.002336	0.168224	0.364486	0.61215	0.992991	0.481308	0.175234	0.343458	0.079625	0.065574	0.004684	0.002336	0.254673	0.602804	0.859813	1	0.109813	0.320093	0.544393	0.703271	0.904206	0.023364	0.154206	0.448598	0.586449	0.978972	0.315421	0.346604	0.023364	0.158879	0.36215	0.614486	0.939252	0.352804
0.369863	0.332192	0.297945	0.250859	0.209622	0.216495	0.010274	0.222603	0.520548	0.760274	0.993151	0.006849	0.318493	0.486301	0.719178	0.996575	0.003425	0.215753	0.476027	0.732877	1	0.30137	0.089041	0.609589	0.030928	0.079038	0.003436	0.003425	0.178082	0.506849	0.770548	1	0.010274	0.027397	0.078767	0.106164	0.174658	0.143836	0.349315	0.547945	0.75	0.962329	0.506849	0.357388	0.013699	0.267123	0.493151	0.722603	0.952055	0.291096
0.34143	0.438596	0.219973	0.268919	0.154054	0.195946	0.005398	0.225371	0.445344	0.748988	1	0.002699	0.261808	0.550607	0.774629	0.99865	0.00135	0.249663	0.418354	0.665317	0.983806	0.775978	0.087719	0.136302	0.051351	0.043243	0.005405	0.00135	0.249663	0.560054	0.796221	1	0.010796	0.265857	0.368421	0.483131	0.883941	0.021592	0.237517	0.34413	0.59919	0.960864	0.360324	0.32973	0.009447	0.249663	0.431849	0.574899	0.974359	0.45614
0.349593	0.406504	0.243902	0.226069	0.181263	0.189409	0.006098	0.21748	0.481707	0.697154	0.993902	0.004065	0.270325	0.565041	0.778455	0.995935	0.002033	0.268293	0.455285	0.711382	1	0.603659	0.103659	0.292683	0.03666	0.089613	0.004073	0.002033	0.221545	0.518293	0.776423	1	0.030488	0.26626	0.380081	0.528455	0.955285	0.028455	0.24187	0.449187	0.713415	0.932927	0.392276	0.362525	0.028455	0.24187	0.46748	0.73374	0.997967	0.418699
0.443243	0.288288	0.268468	0.241877	0.232852	0.166065	0.003604	0.23964	0.52973	0.733333	1	0.014414	0.277477	0.472072	0.758559	0.990991	0.001802	0.210811	0.484685	0.756757	0.996396	0.499099	0.12973	0.371171	0.046931	0.079422	0	0.001802	0.227027	0.452252	0.65045	1	0.138739	0.243243	0.326126	0.781982	0.899099	0.07027	0.331532	0.605405	0.863063	0.987387	0.322523	0.33935	0.005405	0.181982	0.394595	0.803604	0.996396	0.331532
0.332858	0.494654	0.172488	0.271755	0.131241	0.14194	0.002851	0.27655	0.523877	0.776194	1	0.001426	0.203136	0.459016	0.72345	0.998574	0.000713	0.353528	0.592302	0.783321	0.993585	0.650748	0.045617	0.303635	0.027817	0.06776	0.000713	0.000713	0.238061	0.481112	0.709195	1	0.104063	0.37206	0.567356	0.724875	0.994298	0.013542	0.326443	0.580898	0.802566	0.986458	0.329294	0.323823	0.014968	0.295795	0.503207	0.754811	0.993585	0.491091
0.464103	0.310256	0.225641	0.275064	0.195373	0.151671	0.007692	0.292308	0.551282	0.771795	1	0.005128	0.212821	0.441026	0.725641	0.997436	0.002564	0.238462	0.45641	0.717949	0.946154	0.497436	0.158974	0.34359	0.071979	0.061697	0	0.002564	0.202564	0.446154	0.764103	1	0.007692	0.323077	0.5	0.689744	0.866667	0.048718	0.248718	0.584615	0.728205	0.928205	0.346154	0.359897	0.010256	0.238462	0.464103	0.725641	0.992308	0.317949
0.584906	0.339623	0.075472	0.346154	0.134615	0.019231	0.037736	0.245283	0.528302	0.716981	1	0.018868	0.264151	0.490566	0.754717	0.962264	0.056604	0.056604	0.09434	0.226415	0.509434	0.849057	0.132075	0.018868	0.076923	0.038462	0	0.018868	0.339623	0.54717	0.754717	1	0.037736	0.037736	0.075472	0.169811	0.207547	0.792453	0.792453	0.792453	0.792453	0.792453	0.09434	0.192308	0.09434	0.09434	0.226415	0.433962	0.566038	0.433962
0.348637	0.317073	0.33429	0.218952	0.24336	0.212491	0.004304	0.286227	0.531564	0.761119	0.998565	0.001435	0.193687	0.446915	0.736729	1	0.000717	0.256815	0.498565	0.745337	0.996413	0.275466	0.035868	0.688666	0.015793	0.097631	0.007179	0.000717	0.250359	0.45911	0.719512	1	0.014347	0.14132	0.463415	0.591822	0.763989	0.001435	0.257532	0.522956	0.794835	0.997131	0.543042	0.417803	0.002869	0.232425	0.476327	0.745337	0.996413	0.33142
0.365854	0.300813	0.333333	0.180328	0.319672	0.213115	0.065041	0.284553	0.536585	0.780488	1	0.01626	0.211382	0.471545	0.691057	0.96748	0.00813	0.195122	0.439024	0.682927	0.99187	0.365854	0.349593	0.284553	0.098361	0.032787	0	0.00813	0.292683	0.617886	0.902439	1	0.227642	0.317073	0.430894	0.577236	0.682927	0.056911	0.113821	0.186992	0.788618	0.861789	0.471545	0.442623	0.04878	0.252033	0.487805	0.682927	0.99187	0.325203
0.32964	0.454294	0.216066	0.302778	0.144444	0.169444	0.00554	0.310249	0.556787	0.770083	1	0.019391	0.210526	0.421053	0.731302	0.99723	0.00277	0.32687	0.520776	0.725762	0.99446	0.66759	0.091413	0.240997	0.05	0.061111	0.011111	0.00277	0.229917	0.493075	0.750693	1	0.33241	0.470914	0.506925	0.725762	0.99169	0.00831	0.171745	0.457064	0.795014	0.98892	0.34626	0.35	0.022161	0.246537	0.498615	0.714681	0.99446	0.468144
0.322917	0.291667	0.385417	0.147368	0.263158	0.252632	0.083333	0.229167	0.4375	0.875	1	0.041667	0.28125	0.552083	0.760417	0.947917	0.010417	0.177083	0.395833	0.645833	0.9375	0.28125	0.4375	0.28125	0.115789	0.073684	0.010526	0.010417	0.21875	0.520833	0.760417	1	0.145833	0.260417	0.427083	0.614583	0.75	0.03125	0.083333	0.822917	0.895833	0.96875	0.489583	0.4	0.03125	0.260417	0.447917	0.677083	0.9375	0.322917
0.401961	0.27451	0.323529	0.188119	0.267327	0.19802	0.029412	0.186275	0.372549	0.656863	0.980392	0.019608	0.294118	0.588235	0.764706	1	0.009804	0.245098	0.519608	0.823529	0.990196	0.470588	0.441176	0.088235	0.118812	0.019802	0.019802	0.009804	0.117647	0.352941	0.686275	1	0.27451	0.411765	0.568627	0.794118	0.931373	0.166667	0.176471	0.196078	0.215686	0.588235	0.441176	0.316832	0.137255	0.313725	0.509804	0.833333	0.970588	0.313725
0.359551	0.292135	0.348315	0.204545	0.295455	0.204545	0.022472	0.213483	0.561798	0.696629	0.988764	0.033708	0.280899	0.494382	0.808989	0.966292	0.011236	0.179775	0.438202	0.730337	1	0.460674	0.483146	0.05618	0.136364	0.022727	0	0.011236	0.235955	0.561798	0.797753	1	0.168539	0.314607	0.494382	0.730337	0.988764	0.067416	0.067416	0.078652	0.089888	0.11236	0.483146	0.272727	0.044944	0.213483	0.426966	0.741573	0.876404	0.370787
0.358108	0.378378	0.263514	0.333333	0.210884	0.136054	0.054054	0.331081	0.540541	0.702703	0.993243	0.02027	0.22973	0.614865	0.831081	1	0.006757	0.128378	0.304054	0.513514	0.871622	0.506757	0.371622	0.121622	0.108844	0.027211	0	0.006757	0.425676	0.675676	0.810811	1	0.094595	0.189189	0.304054	0.452703	0.871622	0.027027	0.047297	0.5	0.527027	0.560811	0.47973	0.367347	0.02027	0.243243	0.452703	0.817568	0.986486	0.412162
0.475936	0.304813	0.219251	0.311828	0.225806	0.11828	0.048128	0.304813	0.545455	0.721925	0.994652	0.016043	0.26738	0.55615	0.780749	0.973262	0.005348	0.13369	0.342246	0.459893	1	0.641711	0.251337	0.106952	0.075269	0.021505	0	0.005348	0.395722	0.663102	0.823529	1	0.074866	0.144385	0.224599	0.374332	0.994652	0.02139	0.042781	0.454545	0.481283	0.508021	0.417112	0.387097	0.016043	0.203209	0.427807	0.727273	0.946524	0.272727
0.346667	0.32	0.333333	0.243243	0.22973	0.216216	0.026667	0.2	0.573333	0.706667	1	0.04	0.306667	0.493333	0.76	0.96	0.013333	0.226667	0.413333	0.653333	0.973333	0.453333	0.453333	0.093333	0.162162	0.027027	0	0.013333	0.2	0.573333	0.733333	1	0.226667	0.36	0.533333	0.8	0.946667	0.08	0.08	0.106667	0.133333	0.16	0.466667	0.378378	0.066667	0.28	0.506667	0.8	0.933333	0.346667
0.365854	0.349593	0.284553	0.270492	0.172131	0.188525	0.02439	0.170732	0.414634	0.780488	0.99187	0.01626	0.227642	0.471545	0.707317	0.96748	0.00813	0.300813	0.528455	0.813008	1	0.463415	0.292683	0.243902	0.114754	0.065574	0.016393	0.00813	0.252033	0.471545	0.772358	1	0.276423	0.520325	0.626016	0.869919	0.96748	0.105691	0.154472	0.227642	0.430894	0.756098	0.504065	0.311475	0.089431	0.292683	0.528455	0.699187	0.96748	0.333333
0.398058	0.281553	0.320388	0.254902	0.196078	0.186275	0.029126	0.165049	0.436893	0.650485	0.990291	0.019417	0.291262	0.495146	0.757282	1	0.009709	0.262136	0.466019	0.737864	0.951456	0.524272	0.359223	0.116505	0.127451	0.029412	0.009804	0.009709	0.203883	0.572816	0.854369	1	0.223301	0.339806	0.524272	0.718447	0.961165	0.116505	0.135922	0.165049	0.407767	0.436893	0.456311	0.333333	0.116505	0.320388	0.466019	0.737864	0.951456	0.378641
0.408696	0.295652	0.295652	0.280702	0.184211	0.175439	0.026087	0.147826	0.356522	0.66087	1	0.017391	0.226087	0.573913	0.8	0.973913	0.008696	0.365217	0.530435	0.791304	0.982609	0.530435	0.382609	0.086957	0.096491	0.026316	0.026316	0.008696	0.130435	0.382609	0.678261	1	0.321739	0.443478	0.582609	0.808696	0.973913	0.234783	0.243478	0.269565	0.286957	0.947826	0.443478	0.22807	0.234783	0.426087	0.556522	0.826087	0.982609	0.313043
0.3	0.285714	0.414286	0.188406	0.246377	0.15942	0.042857	0.214286	0.442857	0.714286	0.957143	0.057143	0.328571	0.414286	0.642857	0.942857	0.014286	0.142857	0.557143	0.785714	1	0.4	0.4	0.2	0.188406	0.043478	0.014493	0.014286	0.314286	0.628571	0.828571	1	0.228571	0.371429	0.571429	0.785714	0.914286	0.057143	0.085714	0.142857	0.185714	0.514286	0.571429	0.26087	0.057143	0.371429	0.514286	0.771429	0.928571	0.314286
0.31746	0.376984	0.305556	0.215139	0.195219	0.247012	0.02381	0.301587	0.527778	0.797619	1	0.007937	0.257937	0.511905	0.738095	0.972222	0.003968	0.202381	0.43254	0.68254	0.996032	0.305556	0.011905	0.68254	0.007968	0.12749	0	0.003968	0.206349	0.428571	0.666667	1	0.984127	0.984127	0.984127	0.988095	0.992063	0.011905	0.25	0.507937	0.75	0.968254	0.555556	0.390438	0.011905	0.265873	0.511905	0.706349	0.996032	0.380952
0.330645	0.354839	0.314516	0.230769	0.174089	0.238866	0.024194	0.229839	0.471774	0.782258	0.991935	0.008065	0.278226	0.532258	0.733871	0.995968	0.004032	0.209677	0.46371	0.721774	1	0.278226	0.032258	0.689516	0.012146	0.101215	0.012146	0.004032	0.153226	0.346774	0.560484	1	0.25	0.254032	0.262097	0.318548	0.431452	0.020161	0.302419	0.580645	0.774194	0.995968	0.544355	0.364372	0.012097	0.245968	0.508065	0.705645	0.983871	0.375
0.370466	0.365285	0.264249	0.246433	0.190661	0.18677	0.003886	0.198187	0.505181	0.759067	1	0.002591	0.25	0.477979	0.748705	0.998705	0.001295	0.304404	0.51943	0.720207	0.996114	0.512953	0.120466	0.36658	0.051881	0.077821	0.002594	0.001295	0.158031	0.387306	0.725389	1	0.091969	0.380829	0.550518	0.664508	0.954663	0.005181	0.340674	0.568653	0.80829	0.994819	0.42487	0.33463	0.005181	0.304404	0.496114	0.704663	0.996114	0.411917
0.437427	0.290058	0.272515	0.203747	0.237705	0.168618	0.003509	0.197661	0.490058	0.792982	1	0.004678	0.28538	0.511111	0.727485	0.997661	0.00117	0.28655	0.493567	0.701754	0.988304	0.490058	0.139181	0.37076	0.052693	0.07377	0.005855	0.00117	0.180117	0.397661	0.697076	1	0.003509	0.239766	0.449123	0.592982	0.739181	0.016374	0.375439	0.633918	0.847953	0.989474	0.425731	0.332553	0.005848	0.326316	0.504094	0.698246	0.988304	0.327485
0.413665	0.335404	0.250932	0.247512	0.18408	0.177861	0.004969	0.204969	0.490683	0.715528	1	0.002484	0.264596	0.493168	0.762733	0.996273	0.001242	0.309317	0.546584	0.744099	0.997516	0.565217	0.122981	0.311801	0.044776	0.069652	0.004975	0.001242	0.160248	0.356522	0.715528	1	0.032298	0.424845	0.614907	0.745342	0.991304	0.045963	0.382609	0.583851	0.802484	0.980124	0.419876	0.318408	0.040994	0.326708	0.50559	0.744099	0.997516	0.385093
0.388005	0.359853	0.252142	0.259804	0.189951	0.186275	0.002448	0.198286	0.477356	0.74541	1	0.004896	0.27907	0.511628	0.761322	0.995104	0.001224	0.307222	0.50918	0.728274	0.996328	0.518972	0.132191	0.348837	0.050245	0.08701	0.006127	0.001224	0.177479	0.396573	0.725826	1	0.04284	0.358629	0.559364	0.698898	0.990208	0.045288	0.365973	0.575275	0.80661	0.979192	0.433293	0.311275	0.04284	0.362301	0.528764	0.734394	0.996328	0.400245
0.362654	0.328704	0.308642	0.210201	0.22102	0.225657	0.00463	0.185185	0.496914	0.771605	1	0.003086	0.237654	0.481481	0.725309	0.986111	0.001543	0.285494	0.507716	0.757716	0.992284	0.442901	0.143519	0.41358	0.054096	0.081917	0.004637	0.001543	0.148148	0.408951	0.720679	1	0.057099	0.347222	0.513889	0.641975	0.760802	0.006173	0.316358	0.584877	0.82716	0.996914	0.540123	0.361669	0.007716	0.276235	0.481481	0.71142	0.992284	0.334877
0.39586	0.310479	0.293661	0.217617	0.226684	0.204663	0.003881	0.204398	0.482536	0.791721	1	0.002587	0.279431	0.542044	0.741268	0.988357	0.001294	0.26132	0.485123	0.705045	0.989651	0.495472	0.128072	0.376455	0.054404	0.07772	0.005181	0.001294	0.156533	0.398448	0.699871	1	0.023286	0.359638	0.514877	0.637775	0.97542	0.029754	0.344114	0.595084	0.83053	0.996119	0.45925	0.352332	0.007762	0.315653	0.503234	0.712807	0.989651	0.359638
0.38843	0.38961	0.22196	0.276596	0.165485	0.161939	0.003542	0.272727	0.57379	0.782763	0.998819	0.002361	0.199528	0.433294	0.720189	1	0.001181	0.271547	0.493506	0.668241	0.988194	0.641086	0.085006	0.273908	0.037825	0.082742	0.007092	0.001181	0.250295	0.478158	0.752066	1	0.101535	0.475797	0.5549	0.635183	0.946871	0.023613	0.167651	0.486423	0.787485	0.995277	0.453365	0.352246	0.005903	0.257379	0.439197	0.624557	0.988194	0.416765
0.209644	0.561845	0.228512	0.178571	0.119748	0.245798	0.041929	0.381551	0.607966	0.750524	0.995807	0.006289	0.24109	0.454927	0.731656	0.997904	0.002096	0.184486	0.494759	0.767296	1	0.624738	0.083857	0.291405	0.069328	0.073529	0.002101	0.002096	0.266247	0.471698	0.761006	1	0.102725	0.316562	0.559748	0.645702	0.972746	0.033543	0.238994	0.505241	0.752621	0.937107	0.33543	0.508403	0.008386	0.165618	0.473795	0.725367	0.993711	0.559748
0.284333	0.31528	0.400387	0.164729	0.218992	0.255814	0.007737	0.400387	0.617021	0.810445	0.998066	0.003868	0.199226	0.468085	0.736944	1	0.001934	0.230174	0.425532	0.702128	0.992263	0.357834	0.098646	0.54352	0.03876	0.089147	0.01938	0.001934	0.413926	0.626692	0.816248	1	0.040619	0.535783	0.62089	0.793037	0.901354	0.005803	0.185687	0.363636	0.636364	0.969052	0.636364	0.375969	0.003868	0.234043	0.468085	0.72147	0.992263	0.255319
0.273196	0.453608	0.273196	0.21447	0.178295	0.245478	0.023196	0.201031	0.487113	0.657216	0.997423	0.005155	0.322165	0.559278	0.798969	0.994845	0.002577	0.208763	0.425258	0.734536	1	0.600515	0.092784	0.306701	0.03876	0.059432	0.007752	0.002577	0.280928	0.463918	0.791237	1	0.033505	0.118557	0.402062	0.572165	0.992268	0.048969	0.257732	0.626289	0.703608	0.974227	0.536082	0.377261	0.012887	0.257732	0.414948	0.739691	0.992268	0.466495
0.370474	0.337047	0.292479	0.215084	0.251397	0.164804	0.008357	0.253482	0.479109	0.70195	1	0.02507	0.320334	0.526462	0.777159	0.994429	0.002786	0.214485	0.51532	0.724234	0.997214	0.440111	0.197772	0.362117	0.125698	0.055866	0.011173	0.002786	0.37883	0.562674	0.802228	0.991643	0.008357	0.590529	0.715877	0.832869	1	0.011142	0.153203	0.245125	0.437326	0.902507	0.420613	0.402235	0.005571	0.197772	0.568245	0.746518	0.997214	0.376045
0.316384	0.384181	0.299435	0.249292	0.192635	0.209632	0.022599	0.268362	0.502825	0.731638	0.99435	0.00565	0.189266	0.480226	0.779661	0.997175	0.002825	0.265537	0.516949	0.734463	1	0.491525	0.163842	0.344633	0.073654	0.050992	0.011331	0.002825	0.29661	0.573446	0.841808	1	0.09887	0.305085	0.514124	0.607345	0.988701	0.025424	0.180791	0.364407	0.686441	0.943503	0.50565	0.402266	0.022599	0.20339	0.403955	0.672316	0.988701	0.403955
0.396707	0.393713	0.209581	0.295352	0.163418	0.157421	0.004491	0.257485	0.465569	0.758982	0.998503	0.002994	0.188623	0.392216	0.693114	0.997006	0.001497	0.467066	0.643713	0.832335	1	0.681138	0.095808	0.223054	0.038981	0.053973	0.002999	0.001497	0.169162	0.33982	0.622754	1	0.540419	0.637725	0.748503	0.835329	0.919162	0.413174	0.516467	0.652695	0.80988	0.995509	0.317365	0.227886	0.023952	0.558383	0.709581	0.866766	0.995509	0.428144
0.3711	0.417077	0.211823	0.291118	0.149671	0.179276	0.006568	0.244663	0.441708	0.71757	0.998358	0.003284	0.195402	0.44335	0.729064	0.996716	0.001642	0.45977	0.632184	0.793103	1	0.658456	0.119869	0.221675	0.03125	0.057566	0.008224	0.001642	0.167488	0.331691	0.622332	1	0.507389	0.640394	0.783251	0.876847	0.996716	0.006568	0.482759	0.632184	0.765189	0.950739	0.330049	0.223684	0.021346	0.536946	0.694581	0.834154	0.995074	0.431856
0.405263	0.289474	0.305263	0.242744	0.229551	0.189974	0.013158	0.242105	0.510526	0.789474	1	0.005263	0.268421	0.526316	0.768421	0.997368	0.002632	0.231579	0.447368	0.655263	0.978947	0.439474	0.134211	0.426316	0.047493	0.079156	0.005277	0.002632	0.336842	0.584211	0.831579	1	0.15	0.289474	0.378947	0.568421	0.660526	0.007895	0.121053	0.413158	0.707895	0.992105	0.5	0.343008	0.015789	0.221053	0.439474	0.636842	0.978947	0.328947
0.374707	0.351288	0.274005	0.269953	0.206573	0.185446	0.009368	0.229508	0.437939	0.735363	1	0.004684	0.177986	0.496487	0.744731	0.985948	0.002342	0.35363	0.550351	0.747073	0.995316	0.461358	0.133489	0.405152	0.061033	0.075117	0.004695	0.002342	0.154567	0.468384	0.723653	1	0.051522	0.447307	0.5363	0.704918	0.995316	0.01171	0.257611	0.480094	0.800937	0.960187	0.470726	0.328638	0.01171	0.344262	0.543326	0.737705	0.995316	0.381733
0.395973	0.298658	0.305369	0.259259	0.245791	0.20202	0.006711	0.181208	0.446309	0.731544	0.996644	0.010067	0.248322	0.47651	0.687919	1	0.003356	0.312081	0.573826	0.781879	0.983221	0.399329	0.171141	0.42953	0.06734	0.080808	0.006734	0.003356	0.258389	0.550336	0.744966	1	0.224832	0.392617	0.486577	0.671141	0.825503	0.040268	0.167785	0.372483	0.791946	0.973154	0.520134	0.363636	0.077181	0.291946	0.510067	0.724832	0.969799	0.318792
0.422269	0.302521	0.27521	0.231579	0.233684	0.16	0.006303	0.222689	0.44958	0.726891	1	0.004202	0.210084	0.504202	0.737395	0.989496	0.002101	0.367647	0.569328	0.773109	0.991597	0.489496	0.117647	0.392857	0.046316	0.08	0.004211	0.002101	0.189076	0.430672	0.733193	1	0.184874	0.531513	0.602941	0.72479	0.821429	0.010504	0.313025	0.489496	0.802521	0.993697	0.434874	0.336842	0.014706	0.42437	0.605042	0.777311	0.991597	0.338235
0.417241	0.351724	0.231034	0.307427	0.172712	0.170984	0.008621	0.227586	0.42069	0.7	0.996552	0.003448	0.217241	0.467241	0.736207	1	0.001724	0.431034	0.658621	0.813793	0.998276	0.605172	0.127586	0.267241	0.053541	0.063903	0.001727	0.001724	0.174138	0.353448	0.648276	1	0.018966	0.522414	0.689655	0.808621	0.905172	0.277586	0.475862	0.6	0.882759	0.994828	0.37069	0.265976	0.018966	0.5	0.663793	0.832759	0.993103	0.368966
0.448276	0.364532	0.187192	0.337171	0.143092	0.157895	0.004926	0.228243	0.382594	0.650246	0.995074	0.003284	0.188834	0.472906	0.727422	1	0.001642	0.546798	0.692939	0.863711	0.996716	0.663383	0.085386	0.251232	0.03125	0.067434	0.004934	0.001642	0.183908	0.349754	0.617406	1	0.047619	0.614122	0.707718	0.821018	0.906404	0.029557	0.535304	0.668309	0.885057	0.995074	0.308703	0.213816	0.00821	0.579639	0.706076	0.850575	0.99179	0.425287
0.346912	0.419185	0.233903	0.292105	0.180263	0.194737	0.003942	0.285151	0.538765	0.763469	1	0.002628	0.206307	0.462549	0.700394	0.998686	0.001314	0.273325	0.512484	0.767411	0.996058	0.710907	0.098555	0.190539	0.051316	0.059211	0.003947	0.001314	0.215506	0.480946	0.727989	1	0.111695	0.445466	0.578187	0.834428	0.969777	0.003942	0.34297	0.46912	0.809461	0.99343	0.403417	0.386842	0.005256	0.291721	0.532194	0.787122	0.996058	0.423127
0.324251	0.337875	0.337875	0.191257	0.256831	0.245902	0.029973	0.223433	0.520436	0.790191	0.997275	0.00545	0.258856	0.463215	0.705722	0.972752	0.002725	0.253406	0.506812	0.735695	1	0.452316	0.185286	0.362398	0.090164	0.101093	0.008197	0.002725	0.253406	0.498638	0.683924	1	0.046322	0.160763	0.376022	0.583106	0.929155	0.013624	0.286104	0.613079	0.814714	0.99455	0.555858	0.442623	0.016349	0.237057	0.512262	0.743869	0.99455	0.365123
0.257692	0.498077	0.244231	0.22158	0.132948	0.204239	0.021154	0.280769	0.488462	0.676923	0.994231	0.003846	0.201923	0.492308	0.767308	1	0.001923	0.284615	0.513462	0.775	0.998077	0.675	0.130769	0.194231	0.05395	0.026975	0.011561	0.001923	0.213462	0.582692	0.763462	1	0.007692	0.321154	0.455769	0.901923	0.996154	0.063462	0.236538	0.373077	0.544231	0.990385	0.551923	0.308285	0.005769	0.278846	0.525	0.705769	0.998077	0.526923
0.236273	0.544093	0.219634	0.191667	0.115	0.213333	0.013311	0.207987	0.396007	0.640599	0.995008	0.003328	0.294509	0.559068	0.748752	1	0.001664	0.237937	0.439268	0.78203	0.998336	0.745424	0.129784	0.124792	0.053333	0.023333	0.01	0.001664	0.292845	0.562396	0.753744	1	0.006656	0.221298	0.356073	0.916805	0.996672	0.008319	0.141431	0.27787	0.420965	0.988353	0.613977	0.326667	0.004992	0.279534	0.514143	0.730449	0.998336	0.560732
0.273141	0.494689	0.23217	0.226444	0.12614	0.215805	0.030349	0.209408	0.488619	0.707132	0.995448	0.003035	0.227618	0.479514	0.748103	1	0.001517	0.329287	0.52959	0.772382	0.996965	0.637329	0.098634	0.264036	0.042553	0.066869	0.00304	0.001517	0.283763	0.626707	0.792109	1	0.353566	0.421851	0.518968	0.925645	0.996965	0.007587	0.162367	0.29742	0.447648	0.989378	0.538695	0.319149	0.010622	0.330804	0.581184	0.763278	0.998483	0.517451
0.282369	0.370523	0.347107	0.209655	0.201379	0.262069	0.008264	0.279614	0.506887	0.772727	0.998623	0.002755	0.230028	0.487603	0.758953	0.997245	0.001377	0.23416	0.49449	0.719008	1	0.374656	0.11708	0.508264	0.046897	0.093793	0.002759	0.001377	0.260331	0.545455	0.790634	1	0.006887	0.085399	0.252066	0.581267	0.805785	0.0427	0.287879	0.493113	0.754821	0.993113	0.57438	0.342069	0.009642	0.230028	0.509642	0.736915	0.980716	0.402204
0.358108	0.304054	0.337838	0.231293	0.244898	0.217687	0.040541	0.263514	0.452703	0.648649	0.986486	0.013514	0.141892	0.466216	0.695946	0.993243	0.006757	0.310811	0.608108	0.837838	1	0.310811	0.364865	0.324324	0.095238	0.054422	0	0.006757	0.209459	0.52027	0.709459	1	0.047297	0.141892	0.263514	0.587838	0.695946	0.378378	0.452703	0.804054	0.885135	0.966216	0.567568	0.353741	0.047297	0.25	0.533784	0.777027	0.97973	0.304054
0.435252	0.28777	0.276978	0.227437	0.245487	0.176895	0.010791	0.266187	0.543165	0.802158	1	0.007194	0.244604	0.47482	0.71223	0.978417	0.003597	0.219424	0.438849	0.726619	0.996403	0.543165	0.147482	0.309353	0.057762	0.086643	0.00722	0.003597	0.179856	0.489209	0.76259	1	0.151079	0.255396	0.316547	0.726619	0.902878	0.010791	0.338129	0.557554	0.661871	0.992806	0.284173	0.353791	0.039568	0.241007	0.370504	0.607914	0.985612	0.316547
0.386935	0.407035	0.20603	0.343434	0.156566	0.141414	0.020101	0.241206	0.572864	0.834171	1	0.01005	0.231156	0.497487	0.748744	0.979899	0.005025	0.251256	0.38191	0.60804	0.969849	0.633166	0.135678	0.231156	0.050505	0.060606	0	0.005025	0.190955	0.472362	0.763819	1	0.281407	0.41206	0.447236	0.603015	0.668342	0.025126	0.356784	0.552764	0.924623	0.984925	0.291457	0.323232	0.025126	0.331658	0.497487	0.648241	0.984925	0.437186
0.323432	0.313531	0.363036	0.198675	0.264901	0.235099	0.009901	0.287129	0.570957	0.805281	0.993399	0.006601	0.240924	0.485149	0.752475	1	0.0033	0.191419	0.452145	0.653465	0.976898	0.478548	0.356436	0.165017	0.112583	0.05298	0.006623	0.0033	0.346535	0.646865	0.854785	1	0.013201	0.20462	0.379538	0.554455	0.980198	0.115512	0.155116	0.514851	0.729373	0.778878	0.50165	0.377483	0.013201	0.247525	0.448845	0.627063	0.983498	0.369637
0.299383	0.373457	0.32716	0.198142	0.198142	0.250774	0.006173	0.225309	0.518519	0.777778	0.990741	0.009259	0.259259	0.478395	0.712963	1	0.003086	0.231481	0.503086	0.75	0.993827	0.567901	0.197531	0.234568	0.086687	0.06192	0.012384	0.003086	0.287037	0.490741	0.759259	1	0.070988	0.268519	0.432099	0.567901	0.944444	0.021605	0.185185	0.62037	0.737654	0.885802	0.617284	0.315789	0.012346	0.253086	0.512346	0.731481	0.993827	0.376543
0.35206	0.303371	0.344569	0.229323	0.244361	0.233083	0.026217	0.284644	0.546816	0.790262	0.996255	0.007491	0.250936	0.475655	0.764045	1	0.003745	0.217228	0.449438	0.662921	0.973783	0.445693	0.333333	0.220974	0.086466	0.06391	0.018797	0.003745	0.307116	0.565543	0.842697	1	0.011236	0.247191	0.393258	0.546816	0.962547	0.037453	0.093633	0.629213	0.764045	0.917603	0.490637	0.421053	0.014981	0.269663	0.47191	0.662921	0.985019	0.325843
0.360208	0.388817	0.250975	0.277344	0.183594	0.19401	0.002601	0.218466	0.472042	0.778934	0.9987	0.006502	0.284785	0.504551	0.728218	0.996099	0.0013	0.273082	0.508453	0.73212	1	0.447334	0.214564	0.338101	0.083333	0.070312	0	0.0013	0.245774	0.53186	0.752926	1	0.006502	0.249675	0.485046	0.738622	0.985696	0.023407	0.254876	0.491547	0.717815	0.975293	0.397919	0.317708	0.003901	0.292588	0.504551	0.736021	0.997399	0.413524
0.375291	0.393939	0.230769	0.281214	0.165694	0.187865	0.003497	0.20979	0.446387	0.738928	1	0.002331	0.248252	0.509324	0.748252	0.987179	0.001166	0.332168	0.559441	0.754079	0.995338	0.486014	0.16317	0.350816	0.05951	0.087515	0.001167	0.001166	0.213287	0.441725	0.719114	1	0.003497	0.399767	0.614219	0.784382	0.924242	0.017483	0.270396	0.497669	0.744755	0.986014	0.351981	0.289382	0.002331	0.367133	0.55711	0.778555	0.987179	0.437063
0.362805	0.365854	0.271341	0.264122	0.169466	0.20916	0.01372	0.248476	0.477134	0.762195	0.995427	0.003049	0.219512	0.48628	0.722561	0.996951	0.001524	0.27439	0.544207	0.759146	1	0.490854	0.135671	0.373476	0.047328	0.083969	0.010687	0.001524	0.1875	0.387195	0.722561	1	0.030488	0.503049	0.660061	0.86128	0.964939	0.006098	0.291159	0.52439	0.728659	0.993902	0.493902	0.345038	0.006098	0.324695	0.542683	0.759146	0.993902	0.381098
0.360563	0.416901	0.222535	0.330042	0.124118	0.188999	0.004225	0.21831	0.453521	0.721127	0.995775	0.008451	0.226761	0.477465	0.752113	0.997183	0.001408	0.360563	0.602817	0.791549	1	0.587324	0.112676	0.3	0.039492	0.059238	0.005642	0.001408	0.164789	0.311268	0.612676	1	0.040845	0.592958	0.709859	0.895775	0.967606	0.004225	0.43662	0.633803	0.778873	0.997183	0.497183	0.358251	0.007042	0.31831	0.547887	0.75493	0.994366	0.457746
0.367704	0.340467	0.291829	0.231969	0.208577	0.208577	0.007782	0.252918	0.501946	0.774319	0.992218	0.005837	0.214008	0.470817	0.710117	0.998054	0.001946	0.270428	0.519455	0.7393	1	0.439689	0.16537	0.394942	0.05653	0.076023	0.005848	0.001946	0.138132	0.375486	0.727626	1	0.040856	0.445525	0.634241	0.787938	0.957198	0.005837	0.299611	0.540856	0.756809	0.990272	0.550584	0.335283	0.005837	0.309339	0.509728	0.752918	0.996109	0.344358
0.344985	0.369301	0.285714	0.270928	0.191781	0.191781	0.004559	0.232523	0.466565	0.740122	0.99696	0.007599	0.217325	0.515198	0.756839	0.99848	0.00152	0.288754	0.510638	0.727964	1	0.489362	0.133739	0.3769	0.039574	0.073059	0.009132	0.00152	0.158055	0.474164	0.787234	1	0.004559	0.303951	0.484802	0.600304	0.75228	0.010638	0.325228	0.566869	0.772036	0.908815	0.50304	0.374429	0.00304	0.276596	0.486322	0.712766	0.993921	0.395137
0.370871	0.333333	0.295796	0.245113	0.21203	0.209023	0.004505	0.243243	0.496997	0.750751	0.998498	0.006006	0.192192	0.441441	0.734234	0.992492	0.001502	0.325826	0.533033	0.749249	1	0.509009	0.124625	0.366366	0.039098	0.07218	0.009023	0.001502	0.13964	0.34985	0.737237	1	0.024024	0.405405	0.569069	0.684685	0.795796	0.013514	0.373874	0.558559	0.812312	0.947447	0.495495	0.345865	0.006006	0.301802	0.483483	0.726727	0.992492	0.34985
0.39708	0.313869	0.289051	0.255848	0.21345	0.185673	0.007299	0.213139	0.515328	0.785401	1	0.011679	0.233577	0.461314	0.725547	0.99562	0.00146	0.294891	0.512409	0.705109	0.99708	0.513869	0.128467	0.357664	0.05117	0.059942	0.00731	0.00146	0.154745	0.470073	0.865693	1	0.00438	0.359124	0.519708	0.672993	0.90073	0.013139	0.328467	0.559124	0.759124	0.858394	0.486131	0.342105	0.00438	0.280292	0.472993	0.69635	0.99708	0.340146
0.351156	0.375723	0.273121	0.267728	0.193922	0.195369	0.007225	0.192197	0.482659	0.734104	1	0.00578	0.291908	0.566474	0.819364	0.995665	0.001445	0.236994	0.465318	0.682081	0.998555	0.526012	0.137283	0.336705	0.050651	0.070912	0.004342	0.001445	0.16474	0.49711	0.867052	1	0.021676	0.346821	0.50289	0.621387	0.859827	0.004335	0.313584	0.495665	0.74422	0.945087	0.473988	0.335745	0.004335	0.264451	0.465318	0.682081	0.99422	0.398844
0.387387	0.288288	0.324324	0.245455	0.263636	0.227273	0.027027	0.189189	0.405405	0.720721	0.981982	0.036036	0.198198	0.504505	0.765766	0.990991	0.009009	0.351351	0.495495	0.711712	1	0.504505	0.243243	0.252252	0.090909	0.054545	0	0.009009	0.18018	0.351351	0.81982	1	0.099099	0.279279	0.558559	0.675676	0.936937	0.045045	0.396396	0.459459	0.738739	0.801802	0.405405	0.436364	0.045045	0.306306	0.531532	0.684685	0.972973	0.288288
0.334365	0.331269	0.334365	0.22314	0.231405	0.245868	0.004128	0.214654	0.480908	0.726522	0.998968	0.008256	0.257998	0.522188	0.75645	0.992776	0.001032	0.260062	0.49742	0.762642	1	0.465428	0.224974	0.309598	0.083678	0.069215	0.005165	0.001032	0.220846	0.449948	0.657379	1	0.003096	0.216718	0.499484	0.675955	0.988648	0.038184	0.293086	0.608875	0.816305	0.996904	0.561404	0.380165	0.007224	0.30031	0.54902	0.77709	0.996904	0.345717
0.376645	0.320724	0.302632	0.230643	0.248764	0.181219	0.004934	0.225329	0.427632	0.725329	1	0.003289	0.305921	0.527961	0.753289	0.995066	0.001645	0.220395	0.557566	0.758224	0.996711	0.462171	0.131579	0.40625	0.051071	0.103789	0.001647	0.001645	0.335526	0.5625	0.805921	1	0.164474	0.268092	0.675987	0.810855	0.929276	0.006579	0.144737	0.361842	0.618421	0.991776	0.434211	0.401977	0.011513	0.291118	0.590461	0.782895	0.996711	0.383224
0.337931	0.37931	0.282759	0.238342	0.200345	0.193437	0.005172	0.281034	0.487931	0.762069	0.998276	0.003448	0.193103	0.412069	0.684483	0.994828	0.001724	0.291379	0.581034	0.77931	1	0.501724	0.106897	0.391379	0.034542	0.08981	0.003454	0.001724	0.239655	0.548276	0.806897	1	0.246552	0.57069	0.744828	0.834483	0.943103	0.008621	0.212069	0.394828	0.606897	0.977586	0.45	0.390328	0.008621	0.287931	0.575862	0.774138	0.994828	0.427586
0.32153	0.40085	0.27762	0.239716	0.191489	0.204255	0.002833	0.276204	0.525496	0.774788	0.997167	0.004249	0.216714	0.432011	0.720963	1	0.001416	0.273371	0.542493	0.752125	0.990085	0.562323	0.101983	0.335694	0.036879	0.087943	0.002837	0.001416	0.314448	0.502833	0.800283	1	0.157224	0.345609	0.750708	0.827195	0.917847	0.016997	0.194051	0.466006	0.651558	0.947592	0.477337	0.371631	0.016997	0.280453	0.5	0.752125	0.990085	0.439093
0.368421	0.355263	0.276316	0.306667	0.213333	0.146667	0.026316	0.210526	0.486842	0.763158	1	0.052632	0.328947	0.539474	0.776316	0.947368	0.013158	0.144737	0.315789	0.592105	0.921053	0.447368	0.552632	0	0.186667	0	0	0.013158	0.105263	0.394737	0.657895	1	0.118421	0.289474	0.565789	0.75	0.947368	0	0	0	0	0	0.539474	0.426667	0.092105	0.276316	0.5	0.697368	0.921053	0.368421
0.40038	0.337761	0.26186	0.285171	0.224335	0.15019	0.005693	0.225806	0.426945	0.709677	0.996205	0.003795	0.210626	0.455408	0.732448	1	0.001898	0.42315	0.601518	0.802657	0.998102	0.563567	0.148008	0.288425	0.060837	0.04943	0.015209	0.001898	0.189753	0.347249	0.658444	1	0.055028	0.402277	0.667932	0.793169	0.973435	0.00759	0.442125	0.593928	0.806452	0.994307	0.436433	0.406844	0.013283	0.383302	0.574953	0.798861	0.99241	0.368121
0.321839	0.385878	0.292282	0.230263	0.185855	0.246711	0.00821	0.211823	0.425287	0.727422	1	0.004926	0.26601	0.52381	0.760263	0.990148	0.001642	0.28243	0.520525	0.73399	0.996716	0.612479	0.17734	0.210181	0.082237	0.069079	0	0.001642	0.275862	0.484401	0.773399	1	0.004926	0.254516	0.558292	0.740558	0.996716	0.027915	0.18555	0.464696	0.720854	0.850575	0.45156	0.365132	0.003284	0.298851	0.558292	0.816092	0.996716	0.367816
0.448878	0.361596	0.189526	0.254682	0.153558	0.139825	0.003741	0.157107	0.38404	0.690773	1	0.002494	0.34414	0.59601	0.793017	0.995012	0.001247	0.305486	0.493766	0.680798	0.997506	0.715711	0.088529	0.195761	0.036205	0.041199	0.001248	0.001247	0.183292	0.418953	0.724439	1	0.314214	0.452618	0.571072	0.63217	0.796758	0.032419	0.391521	0.684539	0.886534	0.997506	0.273067	0.277154	0.23192	0.452618	0.598504	0.721945	0.993766	0.392768
0.358974	0.333333	0.307692	0.267241	0.189655	0.198276	0.042735	0.188034	0.57265	0.794872	1	0.025641	0.299145	0.521368	0.752137	0.982906	0.008547	0.17094	0.393162	0.692308	0.965812	0.444444	0.230769	0.324786	0.103448	0.068966	0	0.008547	0.213675	0.521368	0.649573	1	0.17094	0.25641	0.350427	0.42735	0.564103	0.051282	0.119658	0.735043	0.846154	0.965812	0.410256	0.448276	0.034188	0.25641	0.478632	0.74359	0.965812	0.358974
0.5	0.164062	0.335938	0.165354	0.362205	0.102362	0.039062	0.296875	0.570312	0.789062	1	0.023438	0.195312	0.476562	0.726562	0.914062	0.007812	0.179688	0.382812	0.65625	0.945312	0.429688	0.234375	0.335938	0.062992	0.07874	0	0.007812	0.179688	0.523438	0.65625	1	0.195312	0.242188	0.328125	0.40625	0.5	0.085938	0.15625	0.726562	0.84375	0.960938	0.359375	0.425197	0.046875	0.273438	0.484375	0.75	0.945312	0.234375
0.447368	0.245614	0.307018	0.274336	0.274336	0.123894	0.017544	0.22807	0.54386	0.72807	0.991228	0.026316	0.245614	0.508772	0.824561	1	0.008772	0.219298	0.385965	0.692982	0.95614	0.403509	0.245614	0.350877	0.088496	0.070796	0	0.008772	0.201754	0.535088	0.631579	1	0.166667	0.254386	0.342105	0.421053	0.5	0.04386	0.122807	0.72807	0.842105	0.95614	0.412281	0.460177	0.026316	0.245614	0.464912	0.72807	0.95614	0.280702
0.393004	0.320988	0.286008	0.28866	0.245361	0.197938	0.006173	0.253086	0.475309	0.699588	1	0.004115	0.238683	0.54321	0.792181	0.997942	0.002058	0.234568	0.49177	0.744856	0.99177	0.444444	0.104938	0.450617	0.047423	0.092784	0.006186	0.002058	0.263374	0.555556	0.812757	1	0.26749	0.308642	0.442387	0.847737	0.934156	0.006173	0.203704	0.473251	0.621399	0.993827	0.442387	0.395876	0.010288	0.234568	0.512346	0.82716	0.99177	0.316872
0.232877	0.554795	0.212329	0.223368	0.089347	0.216495	0.006849	0.363014	0.503425	0.756849	1	0.010274	0.243151	0.469178	0.688356	0.986301	0.003425	0.215753	0.527397	0.767123	0.996575	0.719178	0.075342	0.205479	0.054983	0.041237	0.006873	0.003425	0.239726	0.469178	0.763699	1	0.071918	0.099315	0.777397	0.821918	0.90411	0.14726	0.421233	0.5	0.558219	0.835616	0.469178	0.302405	0.013699	0.212329	0.441781	0.599315	0.907534	0.59589
0.292135	0.5	0.207865	0.305085	0.101695	0.186441	0.02809	0.207865	0.426966	0.702247	0.91573	0.011236	0.292135	0.61236	0.831461	1	0.005618	0.11236	0.41573	0.533708	0.97191	0.752809	0.146067	0.101124	0.084746	0.039548	0.016949	0.005618	0.258427	0.55618	0.775281	1	0.314607	0.393258	0.5	0.601124	0.876404	0.039326	0.05618	0.089888	0.11236	0.842697	0.38764	0.293785	0.022472	0.325843	0.494382	0.735955	0.97191	0.516854
0.304239	0.448878	0.246883	0.2275	0.1525	0.2275	0.007481	0.304239	0.551122	0.775561	0.997506	0.009975	0.206983	0.438903	0.683292	0.985037	0.002494	0.244389	0.526185	0.795511	1	0.551122	0.084788	0.36409	0.055	0.075	0.01	0.002494	0.184539	0.531172	0.733167	1	0.029925	0.077307	0.798005	0.860349	0.937656	0.054863	0.289277	0.389027	0.665835	0.992519	0.553616	0.34	0.014963	0.256858	0.53616	0.700748	0.985037	0.428928
0.371212	0.318182	0.310606	0.21519	0.243038	0.205063	0.005051	0.300505	0.542929	0.780303	1	0.012626	0.212121	0.436869	0.707071	0.994949	0.002525	0.25	0.494949	0.755051	0.989899	0.229798	0.007576	0.762626	0.005063	0.075949	0	0.002525	0.222222	0.542929	0.739899	1	0.138889	0.138889	0.138889	0.141414	0.143939	0.022727	0.267677	0.494949	0.770202	0.984848	0.502525	0.475949	0.010101	0.262626	0.449495	0.699495	0.989899	0.366162
0.301552	0.394678	0.303769	0.242222	0.177778	0.233333	0.004435	0.226164	0.518847	0.807095	1	0.006652	0.261641	0.505543	0.740576	0.993348	0.002217	0.24612	0.474501	0.696231	0.980044	0.463415	0.121951	0.414634	0.044444	0.084444	0.004444	0.002217	0.223947	0.487805	0.804878	1	0.011086	0.093126	0.40133	0.844789	0.946785	0.108647	0.332594	0.527716	0.698448	0.984479	0.569845	0.346667	0.013304	0.312639	0.523282	0.711752	0.988914	0.392461
0.383249	0.398477	0.218274	0.333333	0.16285	0.160305	0.01269	0.274112	0.467005	0.753807	1	0.005076	0.271574	0.527919	0.730964	0.994924	0.002538	0.180203	0.489848	0.769036	0.989848	0.713198	0.137056	0.149746	0.05598	0.050891	0.005089	0.002538	0.225888	0.428934	0.695431	1	0.010152	0.251269	0.64467	0.784264	0.98731	0.058376	0.489848	0.593909	0.819797	0.939086	0.357868	0.300254	0.040609	0.203046	0.451777	0.730964	0.989848	0.439086
0.337237	0.466042	0.196721	0.309859	0.126761	0.171362	0.018735	0.274005	0.559719	0.796253	0.997658	0.004684	0.220141	0.428571	0.70726	1	0.002342	0.278689	0.526932	0.765808	0.98829	0.702576	0.105386	0.192037	0.039906	0.058685	0.007042	0.002342	0.210773	0.42623	0.70726	1	0.023419	0.283372	0.613583	0.737705	0.786885	0.098361	0.491803	0.576112	0.814988	0.971897	0.334895	0.29108	0.023419	0.241218	0.487119	0.711944	0.98829	0.477752
0.384615	0.438034	0.17735	0.351178	0.119914	0.139186	0.008547	0.241453	0.542735	0.799145	0.997863	0.004274	0.237179	0.459402	0.692308	1	0.002137	0.262821	0.514957	0.730769	0.976496	0.75	0.123932	0.126068	0.047109	0.055675	0.008565	0.002137	0.224359	0.440171	0.724359	1	0.044872	0.311966	0.730769	0.846154	0.978632	0.141026	0.482906	0.523504	0.653846	0.948718	0.344017	0.295503	0.047009	0.258547	0.491453	0.698718	0.980769	0.463675
0.359629	0.322506	0.317865	0.22093	0.202326	0.216279	0.013921	0.243619	0.468677	0.807425	0.986079	0.00464	0.276102	0.522042	0.721578	0.99536	0.00232	0.234339	0.470998	0.700696	1	0.461717	0.092807	0.445476	0.037209	0.088372	0.004651	0.00232	0.211137	0.477958	0.791183	1	0.006961	0.090487	0.25522	0.802784	0.911833	0.109049	0.354988	0.531323	0.712297	0.99536	0.554524	0.344186	0.009281	0.315545	0.524362	0.712297	0.990719	0.345708
0.431138	0.341317	0.227545	0.204819	0.174699	0.156627	0.011976	0.305389	0.443114	0.634731	1	0.017964	0.179641	0.556886	0.742515	0.964072	0.005988	0.137725	0.60479	0.808383	0.994012	0.586826	0.137725	0.275449	0.036145	0.060241	0	0.005988	0.179641	0.365269	0.532934	1	0.101796	0.125749	0.874251	0.958084	0.994012	0.257485	0.580838	0.652695	0.754491	0.826347	0.413174	0.289157	0.023952	0.197605	0.628743	0.802395	0.988024	0.323353
0.340426	0.357447	0.302128	0.264957	0.205128	0.24359	0.012766	0.26383	0.468085	0.761702	0.991489	0.008511	0.221277	0.519149	0.744681	1	0.004255	0.187234	0.523404	0.731915	0.995745	0.404255	0.097872	0.497872	0.029915	0.089744	0.021368	0.004255	0.238298	0.370213	0.676596	1	0.017021	0.178723	0.310638	0.689362	0.714894	0.080851	0.391489	0.53617	0.817021	0.974468	0.544681	0.410256	0.017021	0.280851	0.523404	0.697872	0.995745	0.370213
0.434555	0.356021	0.209424	0.335958	0.160105	0.15748	0.007853	0.267016	0.486911	0.730366	1	0.005236	0.269634	0.554974	0.740838	0.997382	0.002618	0.175393	0.390052	0.753927	0.994764	0.725131	0.086387	0.188482	0.031496	0.068241	0.010499	0.002618	0.209424	0.429319	0.667539	1	0.235602	0.298429	0.649215	0.798429	0.984293	0.099476	0.510471	0.696335	0.856021	0.989529	0.329843	0.278215	0.028796	0.240838	0.5	0.743455	0.994764	0.387435
0.370771	0.373478	0.255751	0.254743	0.153117	0.189702	0.002706	0.285521	0.571042	0.779432	1	0.00406	0.294993	0.549391	0.753721	0.998647	0.001353	0.181326	0.343708	0.618403	0.994587	0.525034	0.062246	0.41272	0.02981	0.070461	0	0.001353	0.41272	0.663058	0.794317	1	0.009472	0.054127	0.14885	0.656292	0.967524	0.027064	0.209743	0.366712	0.504736	0.997294	0.453315	0.352304	0.010825	0.227334	0.37889	0.656292	0.994587	0.389716
0.342268	0.371134	0.286598	0.245868	0.200413	0.216942	0.004124	0.224742	0.461856	0.709278	0.995876	0.014433	0.251546	0.492784	0.783505	0.989691	0.002062	0.274227	0.515464	0.764948	1	0.391753	0.098969	0.509278	0.053719	0.11157	0.012397	0.002062	0.245361	0.51134	0.795876	1	0.008247	0.294845	0.441237	0.82268	0.997938	0.020619	0.235052	0.492784	0.65567	0.950515	0.529897	0.433884	0.010309	0.286598	0.529897	0.781443	0.993814	0.391753
0.323308	0.390977	0.285714	0.242938	0.190207	0.220339	0.005639	0.266917	0.537594	0.802632	0.99812	0.003759	0.25188	0.520677	0.755639	0.996241	0.00188	0.214286	0.43985	0.648496	1	0.479323	0.06015	0.460526	0.016949	0.073446	0.00565	0.00188	0.257519	0.612782	0.843985	1	0.058271	0.071429	0.191729	0.389098	0.639098	0.005639	0.31203	0.477444	0.644737	0.994361	0.488722	0.308851	0.007519	0.219925	0.43609	0.62782	0.992481	0.413534
0.341071	0.371429	0.2875	0.232558	0.19678	0.216458	0.005357	0.223214	0.480357	0.764286	0.998214	0.003571	0.226786	0.4625	0.723214	1	0.001786	0.317857	0.560714	0.751786	0.996429	0.5	0.123214	0.376786	0.064401	0.08229	0.003578	0.001786	0.175	0.510714	0.798214	1	0.057143	0.35	0.605357	0.751786	0.976786	0.119643	0.226786	0.478571	0.691071	0.989286	0.580357	0.336315	0.007143	0.342857	0.555357	0.751786	0.996429	0.408929
0.385841	0.320354	0.293805	0.241135	0.218085	0.205674	0.00531	0.221239	0.492035	0.785841	1	0.00354	0.256637	0.469027	0.727434	0.99646	0.00177	0.260177	0.515044	0.697345	0.99292	0.474336	0.118584	0.40708	0.058511	0.10461	0.005319	0.00177	0.315044	0.59115	0.842478	1	0.047788	0.189381	0.580531	0.697345	0.909735	0.00531	0.210619	0.39646	0.60531	0.980531	0.557522	0.35461	0.019469	0.256637	0.460177	0.637168	0.99292	0.341593
0.312977	0.354962	0.332061	0.210728	0.203065	0.279693	0.007634	0.160305	0.370229	0.732824	0.992366	0.015267	0.312977	0.530534	0.782443	0.996183	0.003817	0.251908	0.5	0.698473	1	0.339695	0.064885	0.59542	0.045977	0.084291	0	0.003817	0.290076	0.515267	0.774809	1	0.015267	0.080153	0.09542	0.293893	0.969466	0.030534	0.244275	0.549618	0.755725	0.958015	0.503817	0.45977	0.015267	0.339695	0.549618	0.717557	0.977099	0.381679
0.325714	0.379048	0.295238	0.232824	0.192748	0.221374	0.011429	0.268571	0.48	0.805714	1	0.00381	0.241905	0.554286	0.779048	0.986667	0.001905	0.198095	0.441905	0.641905	0.998095	0.466667	0.07619	0.457143	0.028626	0.078244	0.005725	0.001905	0.262857	0.617143	0.84381	1	0.059048	0.171429	0.220952	0.598095	0.986667	0.005714	0.314286	0.48	0.645714	0.99619	0.525714	0.320611	0.007619	0.234286	0.481905	0.666667	0.99619	0.417143
0.318264	0.385172	0.296564	0.228261	0.199275	0.226449	0.01085	0.244123	0.468354	0.76311	0.994575	0.003617	0.253165	0.520796	0.759494	1	0.001808	0.240506	0.481013	0.712477	0.998192	0.481013	0.063291	0.455696	0.019928	0.077899	0.005435	0.001808	0.249548	0.636528	0.831826	1	0.056058	0.068716	0.206148	0.381555	0.942134	0.005425	0.305606	0.468354	0.650995	0.985533	0.533454	0.358696	0.007233	0.233273	0.471971	0.654611	0.990958	0.396022
0.313225	0.387471	0.299304	0.248837	0.174419	0.239535	0.006961	0.264501	0.461717	0.75174	0.990719	0.00464	0.213457	0.491879	0.7471	0.99768	0.00232	0.2529	0.519722	0.714617	1	0.445476	0.076566	0.477958	0.034884	0.086047	0.006977	0.00232	0.208817	0.37123	0.728538	1	0.076566	0.111369	0.278422	0.336427	0.99536	0.025522	0.396752	0.559165	0.767981	0.944316	0.508121	0.372093	0.020882	0.334107	0.549884	0.726218	0.99536	0.38051
0.435374	0.369615	0.195011	0.322727	0.152273	0.163636	0.015873	0.285714	0.478458	0.705215	1	0.004535	0.24263	0.487528	0.739229	0.997732	0.002268	0.176871	0.53288	0.777778	0.99093	0.698413	0.097506	0.204082	0.056818	0.061364	0.006818	0.002268	0.23356	0.430839	0.693878	1	0.00907	0.21542	0.337868	0.77551	0.922902	0.040816	0.517007	0.623583	0.825397	0.988662	0.340136	0.286364	0.031746	0.181406	0.344671	0.741497	0.99093	0.39229
0.357968	0.327945	0.314088	0.212963	0.226852	0.231481	0.006928	0.17321	0.404157	0.764434	0.997691	0.004619	0.288684	0.517321	0.727483	0.993072	0.002309	0.290993	0.51963	0.766744	1	0.371824	0.062356	0.56582	0.027778	0.087963	0	0.002309	0.26097	0.450346	0.706697	1	0.233256	0.360277	0.413395	0.715935	0.752887	0.009238	0.159353	0.526559	0.794457	0.981524	0.512702	0.37963	0.009238	0.30485	0.524249	0.766744	0.981524	0.369515
0.335893	0.414587	0.24952	0.298077	0.157692	0.221154	0.005758	0.295585	0.604607	0.827255	1	0.003839	0.232246	0.445298	0.731286	0.990403	0.001919	0.224568	0.454894	0.62572	0.998081	0.485605	0.049904	0.464491	0.026923	0.084615	0.003846	0.001919	0.222649	0.583493	0.848369	1	0.101727	0.111324	0.245681	0.602687	0.857965	0.015355	0.318618	0.477927	0.65643	0.953935	0.456814	0.342308	0.011516	0.245681	0.443378	0.612284	0.996161	0.397313
0.312253	0.371542	0.316206	0.230159	0.178571	0.246032	0.011858	0.185771	0.391304	0.774704	1	0.007905	0.332016	0.541502	0.72332	0.996047	0.003953	0.252964	0.490119	0.719368	0.992095	0.387352	0.01581	0.596838	0.003968	0.138889	0.011905	0.003953	0.328063	0.537549	0.648221	1	0.422925	0.422925	0.426877	0.494071	0.498024	0.01581	0.177866	0.44664	0.778656	0.992095	0.545455	0.388889	0.023715	0.26087	0.505929	0.699605	0.976285	0.403162
0.34058	0.362319	0.297101	0.243194	0.210526	0.219601	0.005435	0.255435	0.536232	0.797101	0.996377	0.003623	0.28442	0.528986	0.778986	1	0.001812	0.184783	0.427536	0.630435	0.992754	0.467391	0.063406	0.469203	0.019964	0.07804	0.005445	0.001812	0.26087	0.641304	0.824275	1	0.056159	0.068841	0.186594	0.373188	0.615942	0.005435	0.29529	0.461957	0.652174	0.994565	0.496377	0.315789	0.007246	0.217391	0.45471	0.625	0.992754	0.418478
0.338583	0.330709	0.330709	0.26087	0.221344	0.245059	0.019685	0.208661	0.409449	0.73622	0.988189	0.007874	0.334646	0.551181	0.779528	0.992126	0.003937	0.212598	0.492126	0.720472	1	0.338583	0	0.661417	0	0.118577	0	0.003937	0.397638	0.570866	0.748031	1	0	0	0	0	0	0.019685	0.19685	0.456693	0.740157	0.996063	0.559055	0.379447	0.011811	0.279528	0.527559	0.720472	0.984252	0.354331
0.334158	0.363861	0.30198	0.265509	0.203474	0.220844	0.00495	0.279703	0.579208	0.824257	1	0.007426	0.252475	0.507426	0.747525	0.997525	0.002475	0.215347	0.418317	0.643564	0.938119	0.356436	0.059406	0.584158	0.034739	0.08933	0.004963	0.002475	0.25495	0.591584	0.871287	1	0.042079	0.079208	0.094059	0.413366	0.962871	0.007426	0.294554	0.487624	0.660891	0.908416	0.534653	0.411911	0.009901	0.277228	0.517327	0.695545	0.987624	0.39604
0.33945	0.394495	0.266055	0.198157	0.239631	0.225806	0.022936	0.188073	0.522936	0.697248	1	0.009174	0.256881	0.568807	0.834862	0.995413	0.004587	0.229358	0.408257	0.642202	0.986239	0.481651	0.165138	0.353211	0.096774	0.087558	0.004608	0.004587	0.266055	0.59633	0.816514	1	0.215596	0.344037	0.412844	0.541284	0.922018	0.013761	0.12844	0.316514	0.738532	0.972477	0.522936	0.40553	0.013761	0.321101	0.610092	0.811927	0.986239	0.366972
0.351682	0.316514	0.331804	0.192956	0.222052	0.217458	0.006116	0.262997	0.547401	0.750765	1	0.003058	0.233945	0.454128	0.698777	0.995413	0.001529	0.247706	0.486239	0.769113	0.990826	0.545872	0.172783	0.281346	0.07657	0.073507	0	0.001529	0.270642	0.550459	0.70948	1	0.067278	0.321101	0.602446	0.810398	0.990826	0.007645	0.17737	0.35474	0.732416	0.934251	0.5	0.352221	0.007645	0.233945	0.457187	0.785933	0.990826	0.334862
0.385965	0.311404	0.302632	0.232796	0.237189	0.171303	0.004386	0.219298	0.495614	0.744152	1	0.002924	0.25731	0.517544	0.763158	0.998538	0.001462	0.248538	0.479532	0.745614	0.942982	0.535088	0.159357	0.305556	0.068814	0.089312	0.001464	0.001462	0.274854	0.538012	0.72076	1	0.096491	0.326023	0.592105	0.766082	0.921053	0.002924	0.121345	0.407895	0.744152	0.997076	0.488304	0.339678	0.020468	0.251462	0.457602	0.75731	0.99269	0.349415
0.405694	0.362989	0.231317	0.3	0.142857	0.192857	0.02847	0.217082	0.455516	0.686833	0.989324	0.010676	0.24911	0.494662	0.754448	0.978648	0.003559	0.256228	0.604982	0.800712	1	0.587189	0.124555	0.288256	0.057143	0.078571	0	0.003559	0.30605	0.47331	0.711744	1	0.007117	0.601423	0.697509	0.814947	0.978648	0.042705	0.11032	0.252669	0.654804	0.918149	0.320285	0.328571	0.007117	0.256228	0.654804	0.818505	0.992883	0.359431
0.455263	0.357895	0.186842	0.248021	0.131926	0.163588	0.026316	0.292105	0.536842	0.668421	0.994737	0.013158	0.223684	0.434211	0.739474	0.997368	0.002632	0.181579	0.647368	0.828947	1	0.634211	0.094737	0.271053	0.042216	0.068602	0.005277	0.002632	0.278947	0.471053	0.678947	1	0.007895	0.697368	0.784211	0.855263	0.965789	0.026316	0.089474	0.378947	0.728947	0.986842	0.278947	0.28496	0.010526	0.289474	0.689474	0.810526	0.992105	0.439474
0.397436	0.333333	0.269231	0.245161	0.141935	0.180645	0.019231	0.205128	0.416667	0.839744	0.987179	0.012821	0.224359	0.532051	0.724359	0.99359	0.00641	0.282051	0.519231	0.666667	1	0.294872	0.115385	0.589744	0.03871	0.103226	0	0.00641	0.173077	0.448718	0.673077	1	0.467949	0.487179	0.660256	0.775641	0.807692	0.038462	0.275641	0.429487	0.833333	0.987179	0.442308	0.348387	0.089744	0.384615	0.551282	0.711538	0.980769	0.346154
0.293403	0.374132	0.332465	0.212858	0.19722	0.259774	0.005208	0.18316	0.479167	0.724826	0.997396	0.001736	0.261285	0.500868	0.74566	0.999132	0.000868	0.27691	0.510417	0.767361	1	0.463542	0.131944	0.404514	0.054735	0.068636	0.000869	0.000868	0.232639	0.488715	0.776042	1	0.127604	0.228299	0.554688	0.802951	0.994792	0.015625	0.280382	0.503472	0.736979	0.985243	0.540799	0.385752	0.007812	0.289931	0.511285	0.749132	0.998264	0.384549
0.434447	0.349614	0.215938	0.292453	0.190395	0.160377	0.001714	0.27078	0.520137	0.772065	1	0.005998	0.24593	0.507284	0.712939	0.999143	0.000857	0.191088	0.429306	0.731791	0.997429	0.651243	0.126821	0.221937	0.060034	0.066895	0.005146	0.000857	0.275921	0.497858	0.724079	1	0.007712	0.130249	0.379606	0.682948	0.968295	0.004284	0.264781	0.649529	0.786632	0.996572	0.311054	0.346484	0.003428	0.208226	0.463582	0.744644	0.997429	0.401885
0.465714	0.35	0.184286	0.267525	0.164521	0.127325	0.002857	0.212857	0.492857	0.775714	0.998571	0.004286	0.234286	0.401429	0.664286	0.994286	0.001429	0.458571	0.604286	0.772857	1	0.607143	0.1	0.292857	0.041488	0.038627	0.001431	0.001429	0.178571	0.335714	0.607143	1	0.134286	0.468571	0.53	0.601429	0.96	0.024286	0.561429	0.734286	0.807143	0.881429	0.438571	0.309013	0.021429	0.351429	0.54	0.771429	0.994286	0.372857
0.450216	0.335498	0.214286	0.310195	0.186551	0.140998	0.028139	0.233766	0.482684	0.75974	1	0.004329	0.238095	0.487013	0.761905	0.995671	0.002165	0.333333	0.512987	0.69697	0.987013	0.593074	0.168831	0.238095	0.060738	0.065076	0	0.002165	0.244589	0.480519	0.772727	1	0.34632	0.458874	0.638528	0.738095	0.952381	0.008658	0.181818	0.383117	0.616883	0.987013	0.311688	0.308026	0.008658	0.404762	0.580087	0.74026	0.987013	0.383117
0.456107	0.316794	0.227099	0.292543	0.18738	0.1587	0.015267	0.270992	0.48855	0.757634	1	0.005725	0.194656	0.480916	0.730916	0.998092	0.001908	0.200382	0.555344	0.740458	0.98855	0.553435	0.173664	0.272901	0.080306	0.072658	0.007648	0.001908	0.23855	0.505725	0.812977	1	0.020992	0.375954	0.549618	0.742366	0.990458	0.03626	0.263359	0.423664	0.631679	0.994275	0.301527	0.279159	0.01145	0.183206	0.566794	0.744275	0.98855	0.349237
0.415825	0.382155	0.20202	0.322091	0.155143	0.153457	0.005051	0.217172	0.481481	0.757576	1	0.003367	0.265993	0.484848	0.786195	0.996633	0.001684	0.328283	0.516835	0.673401	0.989899	0.62963	0.126263	0.244108	0.060708	0.067454	0.003373	0.001684	0.195286	0.521886	0.791246	1	0.011785	0.414141	0.510101	0.653199	0.989899	0.030303	0.250842	0.393939	0.680135	0.981481	0.289562	0.303541	0.011785	0.383838	0.540404	0.771044	0.989899	0.430976
0.485265	0.310413	0.204322	0.281496	0.173228	0.151575	0.009823	0.174853	0.449902	0.75835	1	0.003929	0.330059	0.534381	0.781925	0.994106	0.001965	0.337917	0.485265	0.638507	0.950884	0.638507	0.119843	0.24165	0.05315	0.072835	0.001969	0.001965	0.267191	0.526523	0.774067	1	0.332024	0.428291	0.51277	0.626719	0.943026	0.019646	0.159136	0.373281	0.650295	0.935167	0.273084	0.287402	0.017682	0.385069	0.540275	0.666012	0.962672	0.375246
0.466501	0.305211	0.228288	0.281095	0.199005	0.146766	0.007444	0.2134	0.454094	0.751861	1	0.004963	0.260546	0.545906	0.82134	0.985112	0.002481	0.317618	0.496278	0.669975	0.997519	0.511166	0.233251	0.255583	0.089552	0.064677	0	0.002481	0.26799	0.538462	0.784119	1	0.151365	0.377171	0.468983	0.702233	0.997519	0.007444	0.131514	0.48139	0.734491	0.980149	0.37469	0.363184	0.012407	0.337469	0.513648	0.744417	0.997519	0.369727
0.419094	0.326861	0.254045	0.246353	0.19611	0.171799	0.006472	0.173139	0.377023	0.731392	1	0.003236	0.323625	0.555016	0.770227	0.995146	0.001618	0.33657	0.532362	0.736246	0.982201	0.524272	0.090615	0.385113	0.038898	0.08752	0	0.001618	0.174757	0.490291	0.822006	1	0.440129	0.564725	0.650485	0.771845	0.886731	0.027508	0.286408	0.415858	0.665049	0.977346	0.438511	0.311183	0.021036	0.346278	0.543689	0.695793	0.988673	0.375405
0.34058	0.492754	0.166667	0.319613	0.138015	0.145278	0.007246	0.202899	0.456522	0.676329	1	0.004831	0.243961	0.57971	0.821256	0.997585	0.002415	0.318841	0.442029	0.591787	0.7657	0.751208	0.130435	0.118357	0.048426	0.033898	0	0.002415	0.202899	0.543478	0.811594	1	0.304348	0.386473	0.463768	0.560386	0.657005	0.007246	0.342995	0.42029	0.533816	0.678744	0.429952	0.343826	0.009662	0.376812	0.60628	0.799517	0.968599	0.463768
0.502222	0.297778	0.2	0.245536	0.205357	0.111607	0.017778	0.182222	0.444444	0.733333	1	0.008889	0.271111	0.502222	0.866667	0.982222	0.004444	0.364444	0.528889	0.684444	0.995556	0.471111	0.102222	0.426667	0.035714	0.089286	0	0.004444	0.222222	0.373333	0.622222	1	0.342222	0.36	0.506667	0.657778	0.684444	0.017778	0.151111	0.635556	0.808889	0.991111	0.266667	0.267857	0.04	0.4	0.528889	0.742222	0.982222	0.351111
0.485537	0.245868	0.268595	0.244306	0.26501	0.140787	0.004132	0.254132	0.508264	0.716942	0.989669	0.006198	0.27686	0.553719	0.809917	0.993802	0.002066	0.188017	0.433884	0.752066	1	0.504132	0.128099	0.367769	0.060041	0.076605	0.00207	0.002066	0.402893	0.628099	0.807851	1	0.012397	0.105372	0.328512	0.433884	0.882231	0.008264	0.216942	0.382231	0.652893	0.985537	0.365702	0.430642	0.008264	0.192149	0.392562	0.727273	0.971074	0.297521
0.340716	0.425894	0.23339	0.242321	0.158703	0.204778	0.005111	0.192504	0.449744	0.763203	1	0.006814	0.327087	0.536627	0.703578	0.998296	0.001704	0.218058	0.454855	0.79046	0.994889	0.621806	0.11414	0.264055	0.042662	0.069966	0.005119	0.001704	0.277683	0.529813	0.715503	1	0.093697	0.235094	0.340716	0.599659	0.994889	0.010221	0.192504	0.454855	0.795571	0.993186	0.402044	0.337884	0.010221	0.27598	0.446337	0.720613	0.984668	0.415673
0.254902	0.511765	0.233333	0.227898	0.129666	0.206287	0.015686	0.207843	0.427451	0.727451	0.996078	0.005882	0.288235	0.562745	0.74902	1	0.001961	0.231373	0.464706	0.713725	0.998039	0.631373	0.133333	0.235294	0.05501	0.047151	0.003929	0.001961	0.25098	0.498039	0.698039	1	0.098039	0.166667	0.372549	0.837255	0.937255	0.013725	0.392157	0.641176	0.878431	0.988235	0.511765	0.369352	0.005882	0.307843	0.564706	0.72549	0.992157	0.509804
0.23374	0.534553	0.231707	0.224033	0.118126	0.201629	0.004065	0.174797	0.357724	0.819106	0.995935	0.006098	0.315041	0.565041	0.745935	1	0.002033	0.215447	0.424797	0.723577	0.997967	0.554878	0.160569	0.284553	0.065173	0.044807	0.008147	0.002033	0.256098	0.50813	0.729675	1	0.067073	0.172764	0.365854	0.585366	0.934959	0.083333	0.207317	0.522358	0.863821	0.987805	0.520325	0.325866	0.01626	0.310976	0.583333	0.745935	0.969512	0.52439
0.333913	0.422609	0.243478	0.25784	0.160279	0.210801	0.003478	0.24	0.45913	0.72	0.998261	0.02087	0.290435	0.516522	0.77913	1	0.001739	0.215652	0.493913	0.713043	0.982609	0.593043	0.102609	0.304348	0.04878	0.04878	0.003484	0.001739	0.351304	0.535652	0.787826	1	0.113043	0.584348	0.65913	0.758261	0.866087	0.008696	0.092174	0.215652	0.615652	0.996522	0.427826	0.379791	0.012174	0.226087	0.594783	0.782609	0.982609	0.426087
0.364395	0.378303	0.257302	0.274373	0.193593	0.190808	0.009736	0.272601	0.545202	0.746871	0.998609	0.002782	0.289291	0.54242	0.788595	0.995828	0.001391	0.171071	0.382476	0.655076	1	0.694019	0.1363	0.16968	0.061281	0.041783	0.005571	0.001391	0.388039	0.625869	0.803894	1	0.004172	0.107093	0.230876	0.453408	0.973574	0.026426	0.161335	0.262865	0.411683	0.956885	0.577191	0.384401	0.004172	0.286509	0.568846	0.783032	0.997218	0.393602
0.367089	0.299578	0.333333	0.182203	0.237288	0.224576	0.008439	0.223629	0.472574	0.797468	1	0.012658	0.244726	0.514768	0.755274	0.995781	0.004219	0.227848	0.489451	0.675105	0.991561	0.291139	0.042194	0.666667	0.021186	0.088983	0.004237	0.004219	0.392405	0.683544	0.805907	1	0.485232	0.489451	0.662447	0.670886	0.818565	0.012658	0.194093	0.409283	0.624473	0.987342	0.540084	0.372881	0.025316	0.303797	0.493671	0.662447	0.970464	0.362869
0.357909	0.348525	0.293566	0.230872	0.201342	0.2	0.004021	0.215818	0.502681	0.730563	0.993298	0.002681	0.257373	0.517426	0.816354	1	0.00134	0.246649	0.47319	0.717158	0.995979	0.549598	0.162198	0.288204	0.071141	0.079195	0.001342	0.00134	0.270777	0.525469	0.758713	1	0.096515	0.321716	0.577748	0.766756	0.997319	0.012064	0.140751	0.394102	0.678284	0.957105	0.475871	0.357047	0.012064	0.254692	0.474531	0.753351	0.997319	0.379357
0.378446	0.323308	0.298246	0.228356	0.209536	0.200753	0.003759	0.205514	0.510025	0.775689	1	0.002506	0.243108	0.491228	0.73183	0.997494	0.001253	0.266917	0.488722	0.734336	0.998747	0.570175	0.139098	0.290727	0.058971	0.091593	0.003764	0.001253	0.263158	0.551378	0.750627	1	0.098997	0.333333	0.535088	0.738095	0.907268	0.011278	0.121554	0.373434	0.759398	0.988722	0.462406	0.311167	0.015038	0.23183	0.432331	0.740602	0.989975	0.35213
0.339408	0.379651	0.280942	0.227204	0.193769	0.205927	0.002278	0.307517	0.517844	0.763857	0.999241	0.003797	0.162491	0.39104	0.692483	0.998481	0.000759	0.35915	0.589218	0.798026	1	0.607441	0.069096	0.323462	0.030395	0.068389	0.006079	0.000759	0.15186	0.303721	0.546697	1	0.350038	0.394077	0.45634	0.580866	0.901291	0.319666	0.624146	0.743356	0.88003	0.996203	0.507973	0.37386	0.001519	0.186029	0.529992	0.765376	0.997722	0.408504
0.359596	0.418182	0.222222	0.283401	0.157895	0.174089	0.006061	0.335354	0.531313	0.783838	0.99798	0.00404	0.161616	0.420202	0.723232	0.993939	0.00202	0.256566	0.505051	0.749495	1	0.735354	0.056566	0.208081	0.032389	0.068826	0.004049	0.00202	0.2	0.414141	0.713131	1	0.074747	0.171717	0.460606	0.678788	0.840404	0.167677	0.444444	0.527273	0.913131	0.971717	0.319192	0.336032	0.016162	0.230303	0.438384	0.676768	0.979798	0.428283
0.339568	0.464748	0.195683	0.29683	0.131124	0.164265	0.002878	0.22446	0.428777	0.738129	1	0.007194	0.240288	0.502158	0.741007	0.997122	0.001439	0.352518	0.604317	0.784173	0.992806	0.697842	0.096403	0.205755	0.063401	0.060519	0.005764	0.001439	0.21295	0.456115	0.732374	1	0.053237	0.243165	0.506475	0.782734	0.98705	0.035971	0.348201	0.633094	0.811511	0.974101	0.368345	0.345821	0.025899	0.27482	0.582734	0.771223	0.992806	0.433094
0.414938	0.244813	0.340249	0.18711	0.288981	0.191268	0.006224	0.248963	0.497925	0.763485	1	0.008299	0.215768	0.473029	0.690871	0.987552	0.002075	0.26556	0.526971	0.761411	0.993776	0.292531	0.226141	0.481328	0.064449	0.081081	0.002079	0.002075	0.182573	0.495851	0.686722	1	0.093361	0.290456	0.385892	0.558091	0.995851	0.006224	0.242739	0.653527	0.821577	0.966805	0.481328	0.428274	0.010373	0.282158	0.504149	0.732365	0.993776	0.288382
0.330935	0.359712	0.309353	0.202899	0.217391	0.23913	0.014388	0.302158	0.503597	0.827338	0.985612	0.028777	0.280576	0.532374	0.719424	1	0.007194	0.194245	0.410072	0.647482	0.992806	0.345324	0.309353	0.345324	0.123188	0.07971	0.007246	0.007194	0.230216	0.453237	0.697842	1	0.021583	0.258993	0.489209	0.71223	0.992806	0.05036	0.129496	0.539568	0.798561	0.913669	0.539568	0.463768	0.021583	0.23741	0.489209	0.726619	0.978417	0.467626
0.394937	0.263291	0.341772	0.19797	0.291878	0.208122	0.005063	0.227848	0.475949	0.764557	1	0.012658	0.298734	0.577215	0.75443	0.989873	0.002532	0.225316	0.470886	0.726582	0.994937	0.321519	0.270886	0.407595	0.083756	0.068528	0.002538	0.002532	0.227848	0.546835	0.751899	1	0.106329	0.35443	0.473418	0.610127	0.918987	0.005063	0.255696	0.524051	0.855696	0.994937	0.493671	0.390863	0.010127	0.286076	0.526582	0.729114	0.994937	0.278481
0.469945	0.202186	0.327869	0.186813	0.313187	0.131868	0.016393	0.322404	0.595628	0.819672	1	0.010929	0.245902	0.387978	0.650273	0.983607	0.005464	0.163934	0.448087	0.628415	0.989071	0.295082	0.234973	0.469945	0.076923	0.087912	0.010989	0.005464	0.180328	0.393443	0.639344	1	0.021858	0.202186	0.377049	0.546448	0.775956	0.043716	0.327869	0.672131	0.868852	0.989071	0.442623	0.384615	0.021858	0.196721	0.409836	0.628415	0.989071	0.262295
0.394444	0.298148	0.307407	0.250464	0.261596	0.165121	0.003704	0.233333	0.501852	0.737037	0.998148	0.009259	0.322222	0.572222	0.848148	0.987037	0.001852	0.212963	0.438889	0.644444	1	0.405556	0.207407	0.387037	0.064935	0.068646	0.001855	0.001852	0.314815	0.590741	0.881481	1	0.094444	0.27963	0.374074	0.52963	0.944444	0.012963	0.216667	0.507407	0.709259	0.848148	0.446296	0.378479	0.009259	0.27037	0.464815	0.644444	0.994444	0.346296
0.405567	0.266402	0.328032	0.217131	0.292829	0.175299	0.005964	0.250497	0.469185	0.741551	0.998012	0.003976	0.220676	0.491054	0.72167	1	0.001988	0.282306	0.520875	0.753479	0.994036	0.377734	0.198807	0.423459	0.057769	0.073705	0.005976	0.001988	0.153082	0.353877	0.628231	1	0.097416	0.28827	0.375746	0.479125	0.779324	0.047714	0.427435	0.701789	0.842942	0.986083	0.485089	0.434263	0.007952	0.282306	0.500994	0.725646	0.992048	0.298211
0.392	0.296	0.312	0.224449	0.260521	0.194389	0.004	0.232	0.466	0.744	0.998	0.014	0.302	0.532	0.752	1	0.002	0.252	0.506	0.748	0.992	0.39	0.194	0.416	0.058116	0.078156	0.006012	0.002	0.174	0.358	0.65	1	0.09	0.28	0.38	0.482	0.782	0.04	0.432	0.706	0.846	0.986	0.496	0.428858	0.01	0.282	0.51	0.75	0.992	0.37
0.391608	0.244755	0.363636	0.197183	0.267606	0.211268	0.020979	0.244755	0.517483	0.762238	0.965035	0.013986	0.167832	0.503497	0.734266	0.972028	0.006993	0.258741	0.475524	0.741259	1	0.356643	0.300699	0.342657	0.119718	0.077465	0.007042	0.006993	0.223776	0.447552	0.699301	1	0.027972	0.272727	0.496503	0.713287	0.993007	0.055944	0.132867	0.545455	0.797203	0.916084	0.503497	0.464789	0.027972	0.251748	0.48951	0.734266	0.979021	0.27972
0.409722	0.194444	0.395833	0.160839	0.307692	0.202797	0.013889	0.236111	0.458333	0.756944	1	0.048611	0.291667	0.548611	0.791667	0.979167	0.006944	0.215278	0.472222	0.673611	0.986111	0.361111	0.298611	0.340278	0.118881	0.076923	0.006993	0.006944	0.222222	0.451389	0.6875	1	0.041667	0.277778	0.5	0.722222	0.993056	0.069444	0.145833	0.534722	0.791667	0.909722	0.513889	0.48951	0.020833	0.215278	0.486111	0.729167	0.986111	0.201389
0.428941	0.302326	0.268734	0.266839	0.256477	0.176166	0.005168	0.217054	0.457364	0.751938	0.994832	0.020672	0.299742	0.542636	0.77261	1	0.002584	0.224806	0.488372	0.726098	0.997416	0.364341	0.25323	0.382429	0.072539	0.072539	0.005181	0.002584	0.21447	0.403101	0.682171	1	0.142119	0.387597	0.503876	0.635659	0.899225	0.007752	0.22739	0.583979	0.873385	0.994832	0.475452	0.398964	0.01292	0.30491	0.534884	0.73385	0.989664	0.310078
0.40458	0.274809	0.320611	0.223077	0.3	0.2	0.015267	0.221374	0.435115	0.725191	0.992366	0.038168	0.236641	0.587786	0.770992	1	0.007634	0.244275	0.48855	0.717557	0.977099	0.251908	0	0.748092	0	0.123077	0	0.007634	0.259542	0.480916	0.687023	1	0	0	0	0	0	0.022901	0.229008	0.526718	0.763359	0.984733	0.534351	0.415385	0.045802	0.312977	0.572519	0.740458	0.977099	0.320611
0.30625	0.325	0.36875	0.176101	0.201258	0.27673	0.04375	0.26875	0.49375	0.725	0.975	0.0125	0.21875	0.425	0.7375	0.99375	0.00625	0.2375	0.50625	0.75	1	0.34375	0.025	0.63125	0.012579	0.075472	0.012579	0.00625	0.08125	0.3625	0.83125	1	0.0875	0.0875	0.09375	0.1	0.74375	0.13125	0.3125	0.5125	0.6875	0.93125	0.53125	0.339623	0.025	0.21875	0.50625	0.69375	0.9875	0.34375
0.375	0.305556	0.319444	0.181818	0.286713	0.237762	0.020833	0.222222	0.444444	0.708333	1	0.013889	0.208333	0.513889	0.791667	0.986111	0.006944	0.291667	0.534722	0.729167	0.979167	0.25	0	0.75	0	0.097902	0	0.006944	0.0625	0.326389	0.722222	1	0	0	0	0	0	0.083333	0.291667	0.506944	0.763889	0.979167	0.520833	0.377622	0.090278	0.326389	0.583333	0.756944	0.979167	0.340278
0.321053	0.373684	0.305263	0.253968	0.216931	0.222222	0.015789	0.189474	0.484211	0.757895	1	0.010526	0.263158	0.531579	0.784211	0.984211	0.005263	0.242105	0.473684	0.678947	0.994737	0.310526	0.031579	0.657895	0.010582	0.126984	0	0.005263	0.236842	0.531579	0.863158	1	0.968421	0.968421	0.978947	0.984211	0.994737	0.047368	0.221053	0.473684	0.684211	0.915789	0.521053	0.412698	0.042105	0.294737	0.5	0.694737	0.994737	0.415789
0.354839	0.270968	0.374194	0.168831	0.25974	0.24026	0.025806	0.193548	0.483871	0.793548	0.987097	0.012903	0.206452	0.445161	0.735484	1	0.006452	0.264516	0.516129	0.709677	0.993548	0.296774	0	0.703226	0	0.103896	0	0.006452	0.187097	0.348387	0.729032	1	0	0	0	0	0	0.051613	0.251613	0.516129	0.76129	0.980645	0.522581	0.363636	0.058065	0.270968	0.548387	0.741935	0.974194	0.283871
0.375566	0.321267	0.303167	0.254545	0.25	0.227273	0.0181	0.244344	0.533937	0.733032	1	0.013575	0.221719	0.425339	0.78733	0.995475	0.004525	0.248869	0.502262	0.705882	0.972851	0.21267	0	0.78733	0	0.109091	0	0.004525	0.117647	0.660633	0.873303	1	0	0	0	0	0	0.022624	0.262443	0.470588	0.710407	0.945701	0.506787	0.381818	0.045249	0.271493	0.538462	0.746606	0.972851	0.348416
0.297872	0.333333	0.368794	0.185714	0.228571	0.264286	0.021277	0.255319	0.531915	0.730496	0.985816	0.014184	0.212766	0.425532	0.751773	1	0.007092	0.262411	0.510638	0.744681	0.971631	0.283688	0	0.716312	0	0.128571	0	0.007092	0.198582	0.524823	0.730496	1	0	0	0	0	0	0.06383	0.262411	0.489362	0.765957	0.978723	0.539007	0.371429	0.070922	0.35461	0.560284	0.744681	0.971631	0.382979
0.342357	0.356688	0.300955	0.236045	0.220096	0.218501	0.003185	0.213376	0.414013	0.694268	0.993631	0.007962	0.242038	0.542994	0.737261	1	0.001592	0.30414	0.523885	0.778662	0.996815	0.514331	0.171975	0.313694	0.057416	0.073365	0.00319	0.001592	0.154459	0.466561	0.711783	1	0.017516	0.211783	0.436306	0.773885	0.893312	0.179936	0.36465	0.584395	0.724522	0.996815	0.479299	0.417863	0.007962	0.242038	0.479299	0.759554	0.996815	0.390127
0.363095	0.342262	0.294643	0.223547	0.219076	0.202683	0.004464	0.186012	0.458333	0.684524	1	0.002976	0.260417	0.578869	0.81994	0.995536	0.001488	0.287202	0.491071	0.721726	0.998512	0.552083	0.150298	0.297619	0.067064	0.078987	0.00149	0.001488	0.159226	0.46875	0.767857	1	0.050595	0.229167	0.511905	0.723214	0.89881	0.098214	0.340774	0.561012	0.794643	0.997024	0.50744	0.435171	0.011905	0.270833	0.55506	0.772321	0.997024	0.375
0.357827	0.359425	0.282748	0.2416	0.2176	0.1936	0.004792	0.204473	0.448882	0.720447	1	0.003195	0.21246	0.535144	0.765176	0.995208	0.001597	0.338658	0.539936	0.755591	0.998403	0.507987	0.159744	0.332268	0.0592	0.0752	0.0016	0.001597	0.13738	0.436102	0.670927	1	0.094249	0.246006	0.472843	0.803514	0.86901	0.047923	0.383387	0.619808	0.753994	0.996805	0.48722	0.4128	0.01278	0.27476	0.528754	0.782748	0.996805	0.394569
0.311164	0.353919	0.334917	0.238095	0.202381	0.209524	0.004751	0.223278	0.489311	0.714964	1	0.007126	0.24228	0.534442	0.764846	0.990499	0.002375	0.258907	0.446556	0.752969	0.995249	0.465558	0.16152	0.372922	0.061905	0.090476	0.004762	0.002375	0.292162	0.501188	0.745843	1	0.014252	0.23753	0.807601	0.893112	0.947743	0.073634	0.211401	0.429929	0.615202	0.973872	0.484561	0.414286	0.019002	0.287411	0.574822	0.7981	0.995249	0.356295
0.34126	0.311534	0.347206	0.211905	0.264286	0.213095	0.003567	0.248514	0.483948	0.751486	0.995244	0.002378	0.241379	0.543401	0.776457	1	0.001189	0.250892	0.48038	0.709869	0.998811	0.454221	0.197384	0.348395	0.080952	0.085714	0.007143	0.001189	0.24019	0.487515	0.740785	1	0.005945	0.210464	0.428062	0.812128	0.902497	0.070155	0.262782	0.551724	0.758621	0.997622	0.521998	0.457143	0.004756	0.239001	0.488704	0.760999	0.998811	0.323424
0.318267	0.374765	0.306968	0.19434	0.19434	0.215094	0.024482	0.231638	0.442561	0.696798	0.992467	0.003766	0.20339	0.512241	0.764595	1	0.001883	0.293785	0.544256	0.777778	0.996234	0.517891	0.171375	0.310734	0.05283	0.090566	0.003774	0.001883	0.146893	0.423729	0.696798	1	0.099812	0.274953	0.704331	0.86064	0.932203	0.050847	0.39548	0.521657	0.734463	0.996234	0.514124	0.384906	0.00565	0.278719	0.517891	0.79096	0.996234	0.397363
0.309108	0.366145	0.324747	0.229282	0.221915	0.223757	0.00184	0.26219	0.515179	0.765409	0.99724	0.00368	0.25115	0.484821	0.74057	0.99908	0.00092	0.23827	0.5023	0.74609	1	0.414903	0.130635	0.454462	0.046961	0.069061	0.000921	0.00092	0.282429	0.49126	0.74425	1	0.048758	0.135235	0.477461	0.73781	0.955842	0.00736	0.228151	0.536339	0.766329	0.980681	0.5023	0.441989	0.00276	0.25115	0.49954	0.74977	0.99632	0.402944
0.395722	0.315508	0.28877	0.241935	0.268817	0.123656	0.010695	0.294118	0.55615	0.786096	1	0.026738	0.160428	0.395722	0.727273	0.962567	0.005348	0.235294	0.518717	0.705882	0.994652	0.411765	0.085561	0.502674	0.05914	0.080645	0.005376	0.005348	0.197861	0.44385	0.684492	1	0.139037	0.176471	0.299465	0.320856	0.989305	0.032086	0.374332	0.566845	0.775401	0.967914	0.411765	0.397849	0.02139	0.165775	0.385027	0.657754	0.983957	0.347594
0.339726	0.386301	0.273973	0.228022	0.211538	0.236264	0.005479	0.20274	0.520548	0.769863	0.994521	0.013699	0.254795	0.457534	0.70137	1	0.00274	0.265753	0.528767	0.747945	0.969863	0.69589	0.057534	0.246575	0.098901	0.098901	0.005495	0.00274	0.230137	0.468493	0.720548	1	0.019178	0.257534	0.40274	0.526027	0.857534	0.084932	0.339726	0.646575	0.8	0.994521	0.30137	0.505495	0.013699	0.271233	0.512329	0.734247	0.989041	0.383562
0.375635	0.340102	0.284264	0.259542	0.201018	0.198473	0.010152	0.258883	0.535533	0.769036	1	0.005076	0.261421	0.5	0.753807	0.997462	0.002538	0.218274	0.431472	0.71066	0.982234	0.469543	0.192893	0.337563	0.076336	0.061069	0	0.002538	0.243655	0.520305	0.769036	1	0.19797	0.286802	0.510152	0.624365	0.845178	0.01269	0.126904	0.423858	0.741117	0.98731	0.505076	0.340967	0.025381	0.263959	0.461929	0.692893	0.959391	0.36802
0.339869	0.48366	0.176471	0.311475	0.147541	0.137705	0.055556	0.316993	0.470588	0.761438	0.973856	0.006536	0.153595	0.434641	0.748366	1	0.003268	0.398693	0.575163	0.718954	0.986928	0.699346	0.094771	0.205882	0.045902	0.039344	0	0.003268	0.205882	0.490196	0.816993	1	0.323529	0.578431	0.666667	0.718954	0.957516	0.006536	0.395425	0.447712	0.614379	0.75817	0.415033	0.334426	0.052288	0.199346	0.624183	0.862745	0.993464	0.477124
0.34647	0.372742	0.280788	0.236842	0.192434	0.220395	0.019704	0.295567	0.481117	0.761905	1	0.003284	0.203612	0.533662	0.737274	0.996716	0.001642	0.226601	0.492611	0.748768	0.998358	0.543514	0.178982	0.277504	0.074013	0.050987	0.001645	0.001642	0.247947	0.54023	0.750411	1	0.003284	0.159278	0.303777	0.500821	0.996716	0.060755	0.356322	0.587849	0.891626	0.986864	0.513957	0.332237	0.003284	0.269294	0.563218	0.740558	0.995074	0.3711
0.364789	0.370423	0.264789	0.248237	0.197461	0.211566	0.002817	0.215493	0.502817	0.757746	0.998592	0.005634	0.28169	0.504225	0.752113	0.997183	0.001408	0.253521	0.456338	0.694366	1	0.54507	0.207042	0.247887	0.084626	0.059238	0.002821	0.001408	0.201408	0.484507	0.760563	1	0.025352	0.287324	0.440845	0.646479	0.997183	0.042254	0.356338	0.566197	0.743662	0.95493	0.44507	0.344147	0.011268	0.257746	0.457746	0.738028	0.995775	0.384507
0.360153	0.426564	0.213282	0.299233	0.153453	0.193095	0.014049	0.296296	0.500639	0.719029	0.998723	0.002554	0.222222	0.532567	0.772669	1	0.001277	0.215837	0.448276	0.722861	0.960409	0.598978	0.148148	0.252874	0.056266	0.053708	0.002558	0.001277	0.226054	0.550447	0.753512	1	0.016603	0.199234	0.348659	0.482759	0.597701	0.015326	0.338442	0.572158	0.905492	0.997446	0.526181	0.319693	0.003831	0.263091	0.560664	0.738186	0.98212	0.435504
0.358044	0.381703	0.260252	0.254344	0.192733	0.210111	0.012618	0.250789	0.44164	0.746057	1	0.003155	0.288644	0.570978	0.757098	0.998423	0.001577	0.190852	0.455836	0.687697	0.992114	0.55205	0.167192	0.280757	0.066351	0.050553	0	0.001577	0.304416	0.621451	0.758675	1	0.004732	0.113565	0.253943	0.403785	0.569401	0.023659	0.272871	0.484227	0.913249	0.993691	0.539432	0.319115	0.003155	0.287066	0.597792	0.747634	0.988959	0.383281
0.388805	0.376702	0.234493	0.268182	0.183333	0.178788	0.007564	0.310136	0.518911	0.7882	0.998487	0.003026	0.183056	0.453858	0.738275	1	0.001513	0.26475	0.481089	0.70348	0.966717	0.540091	0.161876	0.298033	0.065152	0.062121	0.001515	0.001513	0.217852	0.523449	0.742814	1	0.102874	0.234493	0.376702	0.487141	0.92587	0.013616	0.325265	0.608169	0.898638	0.995461	0.490166	0.306061	0.019667	0.313162	0.596067	0.768533	0.971256	0.379728
0.371901	0.366391	0.261708	0.270718	0.179558	0.176796	0.008264	0.256198	0.451791	0.716253	1	0.00551	0.22314	0.495868	0.77686	0.997245	0.002755	0.247934	0.526171	0.752066	0.99449	0.37741	0.057851	0.564738	0.022099	0.093923	0	0.002755	0.269972	0.407713	0.633609	1	0.630854	0.85124	0.881543	0.895317	0.917355	0.060606	0.212121	0.528926	0.716253	0.99449	0.504132	0.331492	0.011019	0.206612	0.495868	0.705234	0.986226	0.349862
0.438725	0.389706	0.171569	0.336609	0.159705	0.132678	0.014706	0.262255	0.477941	0.730392	0.985294	0.004902	0.237745	0.507353	0.79902	1	0.002451	0.215686	0.453431	0.72549	0.997549	0.735294	0.04902	0.215686	0.031941	0.081081	0.002457	0.002451	0.296569	0.492647	0.745098	1	0.5	0.678922	0.754902	0.794118	0.875	0.014706	0.093137	0.188725	0.720588	0.987745	0.340686	0.304668	0.012255	0.321078	0.5	0.752451	0.990196	0.428922
0.329915	0.355556	0.31453	0.202055	0.205479	0.241438	0.006838	0.232479	0.480342	0.781197	0.998291	0.003419	0.241026	0.51453	0.77265	1	0.001709	0.261538	0.495726	0.692308	0.993162	0.512821	0.124786	0.362393	0.053082	0.070205	0.001712	0.001709	0.230769	0.512821	0.782906	1	0.011966	0.191453	0.430769	0.564103	0.994872	0.044444	0.324786	0.494017	0.688889	0.964103	0.495726	0.335616	0.005128	0.254701	0.528205	0.709402	0.993162	0.384615
0.320805	0.377181	0.302013	0.232527	0.204301	0.216398	0.010738	0.230872	0.491275	0.711409	1	0.002685	0.328859	0.614765	0.809396	0.990604	0.001342	0.220134	0.395973	0.61745	0.997315	0.586577	0.126174	0.287248	0.051075	0.051075	0.002688	0.001342	0.314094	0.66443	0.830872	1	0.128859	0.22953	0.589262	0.755705	0.997315	0.044295	0.174497	0.33557	0.491275	0.672483	0.500671	0.352151	0.004027	0.244295	0.424161	0.632215	0.997315	0.397315
0.371648	0.310345	0.318008	0.191939	0.25144	0.211132	0.007663	0.249042	0.503831	0.798851	1	0.003831	0.226054	0.522989	0.747126	0.994253	0.001916	0.254789	0.471264	0.691571	0.992337	0.519157	0.116858	0.363985	0.047985	0.06334	0.005758	0.001916	0.283525	0.613027	0.862069	1	0.113027	0.237548	0.632184	0.747126	0.952107	0.005747	0.176245	0.371648	0.570881	0.954023	0.534483	0.349328	0.009579	0.254789	0.434866	0.641762	0.984674	0.333333
0.353873	0.322183	0.323944	0.197531	0.238095	0.21164	0.007042	0.255282	0.554577	0.792254	1	0.003521	0.214789	0.514085	0.741197	0.992958	0.001761	0.257042	0.457746	0.68662	0.998239	0.477113	0.121479	0.401408	0.049383	0.067019	0.003527	0.001761	0.262324	0.522887	0.788732	1	0.146127	0.265845	0.642606	0.822183	0.996479	0.035211	0.209507	0.420775	0.65493	0.954225	0.558099	0.359788	0.012324	0.272887	0.463028	0.681338	0.998239	0.352113
0.325109	0.362845	0.312046	0.231105	0.229651	0.204942	0.002903	0.267054	0.489115	0.751814	1	0.005806	0.223512	0.49492	0.748911	0.998549	0.001451	0.236575	0.503628	0.740203	0.991292	0.442671	0.149492	0.407837	0.050872	0.088663	0.001453	0.001451	0.245283	0.552975	0.764877	1	0.044993	0.153846	0.413643	0.773585	0.994194	0.013062	0.313498	0.49492	0.711176	0.984035	0.496372	0.360465	0.01016	0.236575	0.526851	0.734398	0.995646	0.384615
0.324455	0.377724	0.297821	0.242718	0.174757	0.203883	0.009685	0.239709	0.472155	0.760291	0.992736	0.004843	0.217918	0.506053	0.716707	0.997579	0.002421	0.280872	0.498789	0.767554	1	0.610169	0.164649	0.225182	0.067961	0.038835	0	0.002421	0.152542	0.489104	0.697337	1	0.159806	0.246973	0.438257	0.811138	0.922518	0.213075	0.324455	0.51816	0.854722	0.985472	0.416465	0.373786	0.024213	0.317191	0.527845	0.733656	0.96368	0.384988
0.260274	0.452055	0.287671	0.21978	0.181319	0.244505	0.005479	0.210959	0.441096	0.750685	0.980822	0.008219	0.290411	0.550685	0.747945	1	0.00274	0.205479	0.435616	0.706849	0.991781	0.539726	0.2	0.260274	0.082418	0.038462	0	0.00274	0.290411	0.542466	0.712329	1	0.032877	0.134247	0.309589	0.79726	0.926027	0.09589	0.216438	0.449315	0.865753	0.99726	0.468493	0.39011	0.038356	0.276712	0.506849	0.720548	0.972603	0.468493
0.356077	0.353945	0.289979	0.267094	0.215812	0.179487	0.004264	0.204691	0.420043	0.731343	0.995736	0.027719	0.232409	0.486141	0.727079	1	0.002132	0.339019	0.5629	0.784648	0.989339	0.484009	0.025586	0.490405	0.017094	0.08547	0	0.002132	0.183369	0.309168	0.682303	1	0.014925	0.01919	0.191898	0.968017	0.974414	0.059701	0.424307	0.575693	0.771855	0.948827	0.458422	0.435897	0.014925	0.34968	0.550107	0.765458	0.989339	0.405117
0.349169	0.380048	0.270784	0.238095	0.209524	0.209524	0.007126	0.204276	0.434679	0.736342	0.997625	0.004751	0.301663	0.510689	0.745843	0.985748	0.002375	0.270784	0.534442	0.750594	1	0.551069	0.12114	0.327791	0.069048	0.097619	0.007143	0.002375	0.304038	0.527316	0.795724	1	0.199525	0.4038	0.672209	0.824228	0.997625	0.014252	0.168646	0.339667	0.700713	0.961995	0.427553	0.461905	0.009501	0.32304	0.513064	0.750594	0.990499	0.413302
0.379705	0.333879	0.286416	0.211475	0.213115	0.185246	0.00982	0.247136	0.479542	0.728314	1	0.003273	0.237316	0.513912	0.782324	0.99509	0.001637	0.256956	0.500818	0.736498	0.996727	0.481178	0.212766	0.306056	0.091803	0.068852	0.003279	0.001637	0.212766	0.479542	0.746318	1	0.006547	0.201309	0.404255	0.649755	0.944354	0.070376	0.376432	0.585925	0.833061	0.991817	0.443535	0.337705	0.006547	0.268412	0.543372	0.762684	0.996727	0.322422
0.334247	0.386301	0.279452	0.255144	0.183813	0.1893	0.00274	0.228767	0.482192	0.715068	0.99589	0.00411	0.319178	0.636986	0.857534	0.99863	0.00137	0.216438	0.4	0.587671	1	0.49589	0.050685	0.453425	0.032922	0.093278	0.002743	0.00137	0.445205	0.683562	0.871233	1	0.009589	0.646575	0.676712	0.741096	0.889041	0.020548	0.191781	0.334247	0.478082	0.856164	0.491781	0.386831	0.005479	0.224658	0.471233	0.79589	0.99726	0.442466
0.374251	0.405689	0.22006	0.278861	0.173913	0.164918	0.002994	0.223054	0.450599	0.732036	0.997006	0.004491	0.303892	0.570359	0.775449	0.982036	0.001497	0.226048	0.47006	0.702096	1	0.637725	0.088323	0.273952	0.049475	0.076462	0.004498	0.001497	0.241018	0.519461	0.784431	1	0.073353	0.176647	0.321856	0.642216	0.859281	0.019461	0.278443	0.511976	0.738024	0.991018	0.362275	0.377811	0.008982	0.320359	0.501497	0.714072	0.986527	0.387725
0.405882	0.314706	0.279412	0.225331	0.200295	0.181149	0.005882	0.158824	0.438235	0.732353	1	0.002941	0.289706	0.514706	0.760294	0.992647	0.001471	0.364706	0.557353	0.744118	0.998529	0.491176	0.127941	0.380882	0.045655	0.07511	0.007364	0.001471	0.183824	0.377941	0.739706	1	0.126471	0.426471	0.577941	0.714706	0.926471	0.004412	0.348529	0.529412	0.801471	0.997059	0.427941	0.324006	0.007353	0.385294	0.545588	0.738235	0.997059	0.351471
0.337587	0.349188	0.313225	0.261324	0.207898	0.212544	0.00464	0.24826	0.470998	0.700696	0.99536	0.00232	0.213457	0.490719	0.75522	0.99884	0.00116	0.287703	0.537123	0.769142	1	0.515081	0.216937	0.267981	0.091754	0.049942	0.001161	0.00116	0.183295	0.429234	0.693735	1	0.0058	0.227378	0.527842	0.75522	0.99884	0.100928	0.400232	0.598608	0.796984	0.991879	0.529002	0.376307	0.00348	0.301624	0.580046	0.793503	0.99768	0.354988
0.263543	0.508053	0.228404	0.228739	0.139296	0.193548	0.002928	0.351391	0.549048	0.774524	1	0.005857	0.219619	0.491947	0.727672	0.998536	0.001464	0.20937	0.415813	0.749634	0.994143	0.626647	0.152269	0.221083	0.060117	0.054252	0.001466	0.001464	0.254758	0.491947	0.79063	1	0.143485	0.27672	0.420205	0.740849	0.85798	0.019034	0.228404	0.562225	0.711567	0.992679	0.484627	0.343109	0.007321	0.238653	0.474378	0.761347	0.997072	0.528551
0.354015	0.368613	0.277372	0.271062	0.21978	0.208791	0.029197	0.208029	0.445255	0.686131	0.99635	0.010949	0.240876	0.514599	0.766423	1	0.00365	0.343066	0.576642	0.781022	0.985401	0.532847	0.175182	0.291971	0.07326	0.07326	0	0.00365	0.171533	0.306569	0.532847	1	0.043796	0.357664	0.507299	0.744526	0.854015	0.021898	0.572993	0.733577	0.90146	0.992701	0.481752	0.43956	0.010949	0.306569	0.569343	0.773723	0.985401	0.416058
0.322292	0.388541	0.289167	0.248208	0.194444	0.236559	0.002686	0.231871	0.451209	0.724261	0.993733	0.001791	0.234557	0.495971	0.733214	1	0.000895	0.29991	0.558639	0.784244	0.999105	0.57744	0.145031	0.277529	0.083333	0.068996	0.002688	0.000895	0.233662	0.519248	0.734109	1	0.025962	0.594449	0.711728	0.840645	0.999105	0.007162	0.185318	0.406446	0.574754	0.991047	0.489705	0.387097	0.007162	0.313339	0.576544	0.772605	0.997314	0.402865
0.314251	0.382306	0.303443	0.224269	0.203044	0.24189	0.000801	0.254604	0.504404	0.748599	1	0.001601	0.242594	0.489592	0.734988	0.9996	0.0004	0.252602	0.505204	0.771817	0.997998	0.48799	0.180144	0.331865	0.074089	0.067681	0.006808	0.0004	0.270616	0.520817	0.724179	1	0.002002	0.210568	0.368295	0.652522	0.997998	0.006005	0.255004	0.545236	0.835869	0.995196	0.540032	0.387665	0.001601	0.244596	0.48799	0.76221	0.998399	0.400721
0.306285	0.39101	0.302705	0.223637	0.19618	0.238758	0.000796	0.250597	0.491249	0.753381	1	0.001193	0.243039	0.51432	0.744232	0.999602	0.000398	0.253779	0.487271	0.74821	0.998011	0.488067	0.189737	0.322196	0.072423	0.063669	0.007163	0.000398	0.274861	0.535004	0.729515	1	0.001193	0.214002	0.38027	0.64996	0.998011	0.005171	0.246221	0.49642	0.809069	0.995227	0.539777	0.381218	0.001591	0.247017	0.484487	0.768894	0.998807	0.410899
0.23048	0.508937	0.260583	0.231638	0.140301	0.237288	0.009407	0.160865	0.416745	0.727187	1	0.001881	0.25682	0.486359	0.746943	0.999059	0.000941	0.345249	0.554092	0.775165	0.997178	0.658514	0.130762	0.210724	0.065913	0.043315	0.003766	0.000941	0.231421	0.441204	0.736595	1	0.143932	0.249294	0.468485	0.712135	0.947319	0.008467	0.278457	0.549389	0.837253	0.995296	0.607714	0.295669	0.006585	0.328316	0.530574	0.761054	0.997178	0.523048
0.352542	0.342373	0.305085	0.220488	0.234057	0.195387	0.001356	0.237288	0.506441	0.738983	0.997966	0.010847	0.246102	0.484746	0.761356	1	0.000678	0.261017	0.503729	0.738305	0.99661	0.426441	0.144407	0.429153	0.069878	0.078019	0.004749	0.000678	0.277966	0.460339	0.701017	1	0.007458	0.388475	0.550508	0.810169	0.991864	0.004746	0.186441	0.505085	0.757288	0.96	0.486102	0.421981	0.004746	0.265085	0.51322	0.774915	0.991864	0.355932
0.33218	0.361592	0.306228	0.225974	0.220779	0.228571	0.00173	0.237024	0.502595	0.725779	0.99827	0.00519	0.262976	0.513841	0.767301	1	0.000865	0.242215	0.474913	0.738754	0.997405	0.487024	0.190311	0.322664	0.082251	0.05974	0.006061	0.000865	0.224913	0.515571	0.764706	1	0.00519	0.172145	0.403114	0.677336	0.965398	0.07526	0.33391	0.555363	0.732699	0.968858	0.544118	0.391342	0.002595	0.24654	0.511246	0.758651	0.995675	0.349481
0.357419	0.345806	0.296774	0.237573	0.222079	0.198192	0.002581	0.251613	0.507097	0.745806	0.999355	0.00129	0.241935	0.459355	0.740645	1	0.000645	0.265806	0.530968	0.766452	0.996774	0.46	0.176774	0.363226	0.090381	0.069722	0.005165	0.000645	0.269677	0.46	0.734194	1	0.003226	0.375484	0.6	0.736129	0.963226	0.006452	0.169677	0.502581	0.763871	0.992903	0.474839	0.415752	0.003226	0.266452	0.516774	0.766452	0.996774	0.356129
0.298137	0.39929	0.302573	0.218472	0.175844	0.251332	0.002662	0.24756	0.515528	0.738243	0.997338	0.001775	0.273292	0.516415	0.755989	1	0.000887	0.222715	0.463177	0.753327	0.992014	0.470275	0.171251	0.358474	0.087922	0.07016	0.002664	0.000887	0.193434	0.488909	0.740018	1	0.007986	0.200532	0.416149	0.748891	0.994676	0.04614	0.345164	0.571429	0.781721	0.968944	0.512866	0.40675	0.003549	0.262644	0.512866	0.762201	0.992014	0.404614
0.367206	0.323326	0.309469	0.217593	0.206019	0.236111	0.004619	0.198614	0.454965	0.73903	1	0.006928	0.247113	0.484988	0.748268	0.995381	0.002309	0.309469	0.56351	0.762125	0.990762	0.466513	0.106236	0.427252	0.041667	0.092593	0.00463	0.002309	0.221709	0.508083	0.7806	1	0.020785	0.371824	0.51963	0.572748	0.986143	0.036952	0.256351	0.487298	0.759815	0.972286	0.515012	0.398148	0.009238	0.364896	0.577367	0.787529	0.990762	0.314088
0.32	0.366667	0.313333	0.241611	0.261745	0.241611	0.046667	0.253333	0.5	0.693333	1	0.013333	0.2	0.453333	0.773333	0.98	0.006667	0.213333	0.493333	0.76	0.986667	0.586667	0.386667	0.026667	0.114094	0.020134	0.006711	0.006667	0.246667	0.553333	0.78	1	0.026667	0.22	0.393333	0.606667	0.9	0.633333	0.633333	0.64	0.646667	0.666667	0.413333	0.362416	0.026667	0.206667	0.513333	0.733333	0.986667	0.373333
0.319088	0.413105	0.267806	0.205714	0.182857	0.222857	0.017094	0.299145	0.501425	0.672365	0.980057	0.005698	0.262108	0.509972	0.792023	0.991453	0.002849	0.19943	0.444444	0.698006	1	0.723647	0.193732	0.082621	0.085714	0.034286	0.005714	0.002849	0.296296	0.561254	0.777778	1	0.079772	0.148148	0.267806	0.358974	0.917379	0.008547	0.45584	0.481481	0.940171	0.962963	0.452991	0.308571	0.014245	0.239316	0.501425	0.774929	0.982906	0.421652
0.386777	0.366942	0.246281	0.254967	0.165563	0.167219	0.009917	0.327273	0.560331	0.735537	0.990083	0.003306	0.221488	0.519008	0.803306	1	0.001653	0.18843	0.416529	0.628099	0.998347	0.619835	0.152066	0.228099	0.059603	0.062914	0	0.001653	0.261157	0.566942	0.743802	1	0.003306	0.161983	0.284298	0.522314	0.973554	0.036364	0.358678	0.505785	0.833058	0.995041	0.429752	0.304636	0.004959	0.191736	0.447934	0.852893	0.993388	0.428099
0.441057	0.306911	0.252033	0.295316	0.203666	0.120163	0.012195	0.319106	0.591463	0.808943	1	0.004065	0.213415	0.473577	0.772358	0.997967	0.002033	0.191057	0.400407	0.581301	0.945122	0.593496	0.168699	0.237805	0.077393	0.077393	0	0.002033	0.231707	0.50813	0.794715	1	0.004065	0.189024	0.319106	0.581301	0.857724	0.046748	0.373984	0.520325	0.780488	0.989837	0.373984	0.321792	0.006098	0.150407	0.337398	0.573171	0.945122	0.357724
0.278245	0.489183	0.232572	0.243536	0.129886	0.230307	0.002404	0.246394	0.461538	0.798077	1	0.001202	0.278846	0.527043	0.740986	0.996394	0.000601	0.218149	0.451322	0.701322	0.998798	0.798077	0.061899	0.140024	0.036681	0.039086	0.003007	0.000601	0.289062	0.507212	0.715745	1	0.03125	0.220553	0.719952	0.859375	0.971154	0.001803	0.092548	0.28726	0.846154	0.998798	0.291466	0.340349	0.007212	0.167067	0.413462	0.751803	0.998798	0.521034
0.351906	0.430108	0.217986	0.273973	0.144814	0.196673	0.00391	0.26784	0.491691	0.769306	0.997067	0.001955	0.244379	0.504399	0.740958	1	0.000978	0.230694	0.486804	0.737048	0.999022	0.69697	0.063539	0.239492	0.029354	0.056751	0.001957	0.000978	0.246334	0.499511	0.721408	1	0.061584	0.384164	0.57869	0.907136	0.979472	0.006843	0.213099	0.435973	0.750733	0.998045	0.312805	0.348337	0.005865	0.220919	0.496579	0.753666	0.99609	0.484848
0.333797	0.358832	0.307371	0.236769	0.192201	0.218663	0.004172	0.194715	0.458971	0.732962	0.997218	0.006954	0.260083	0.521558	0.755216	1	0.001391	0.2879	0.50904	0.752434	0.993046	0.381085	0.155772	0.463143	0.054318	0.090529	0.001393	0.001391	0.235049	0.499305	0.713491	1	0.004172	0.299026	0.478442	0.564673	0.958275	0.022253	0.21975	0.495132	0.781641	0.993046	0.561892	0.342618	0.005563	0.301808	0.522949	0.751043	0.993046	0.371349
0.309904	0.421725	0.268371	0.282051	0.163462	0.269231	0.009585	0.255591	0.501597	0.734824	1	0.00639	0.249201	0.485623	0.741214	0.990415	0.003195	0.239617	0.520767	0.753994	0.98722	0.488818	0.162939	0.348243	0.048077	0.067308	0.003205	0.003195	0.188498	0.386581	0.683706	1	0.162939	0.230032	0.517572	0.821086	0.907348	0.073482	0.300319	0.58147	0.785942	0.990415	0.412141	0.378205	0.031949	0.313099	0.603834	0.824281	0.990415	0.412141
0.382883	0.301802	0.315315	0.198646	0.23702	0.189616	0.004505	0.292793	0.538288	0.77027	1	0.006757	0.168919	0.405405	0.655405	0.997748	0.002252	0.29955	0.540541	0.761261	0.995495	0.445946	0.236486	0.317568	0.090293	0.076749	0	0.002252	0.177928	0.466216	0.725225	1	0.094595	0.254505	0.432432	0.707207	0.95045	0.058559	0.308559	0.603604	0.824324	0.995495	0.418919	0.329571	0.015766	0.274775	0.488739	0.716216	0.993243	0.31982
0.347426	0.290441	0.362132	0.174954	0.281768	0.198895	0.003676	0.28125	0.522059	0.775735	0.998162	0.007353	0.202206	0.465074	0.691176	1	0.001838	0.259191	0.514706	0.731618	0.992647	0.216912	0.022059	0.761029	0.005525	0.104972	0.001842	0.001838	0.222426	0.492647	0.737132	1	0.011029	0.014706	0.886029	0.891544	0.897059	0.020221	0.251838	0.503676	0.738971	0.992647	0.529412	0.441989	0.007353	0.262868	0.549632	0.751838	0.992647	0.268382
0.347286	0.339412	0.313303	0.221808	0.22927	0.21476	0.004973	0.237464	0.478243	0.736842	0.998757	0.000829	0.22586	0.507667	0.750104	1	0.000414	0.27932	0.521343	0.760464	0.999586	0.420638	0.138417	0.440945	0.05597	0.075041	0.006219	0.000414	0.183589	0.494405	0.756734	1	0.012433	0.452549	0.670949	0.878574	0.984252	0.033154	0.279735	0.445089	0.688355	0.999171	0.565271	0.396352	0.004559	0.270203	0.507667	0.741815	0.999586	0.334853
0.215517	0.543103	0.241379	0.208696	0.13913	0.252174	0.086207	0.267241	0.525862	0.62931	0.982759	0.017241	0.284483	0.508621	0.801724	1	0.008621	0.12069	0.362069	0.672414	0.965517	0.681034	0.224138	0.094828	0.104348	0.034783	0	0.008621	0.310345	0.543103	0.724138	1	0.094828	0.155172	0.353448	0.405172	0.810345	0.025862	0.034483	0.060345	0.956897	0.982759	0.387931	0.191304	0.025862	0.112069	0.327586	0.655172	0.965517	0.568966
0.290844	0.414722	0.294434	0.23741	0.176259	0.26259	0.003591	0.240575	0.48474	0.788151	0.994614	0.005386	0.253142	0.517056	0.694794	0.998205	0.001795	0.244165	0.472172	0.745063	1	0.603232	0.213645	0.183124	0.071942	0.05036	0	0.001795	0.263914	0.517056	0.732496	1	0.014363	0.231598	0.454219	0.773788	0.994614	0.030521	0.199282	0.43088	0.745063	0.964093	0.536804	0.330935	0.005386	0.233393	0.493716	0.692998	0.992819	0.420108
0.282051	0.447552	0.270396	0.240654	0.170561	0.238318	0.016317	0.202797	0.463869	0.701632	0.979021	0.004662	0.321678	0.543124	0.839161	1	0.002331	0.2331	0.431235	0.645688	0.997669	0.636364	0.216783	0.146853	0.070093	0.037383	0	0.002331	0.284382	0.554779	0.839161	1	0.044289	0.212121	0.368298	0.638695	0.769231	0.072261	0.165501	0.375291	0.613054	0.706294	0.536131	0.359813	0.02331	0.300699	0.582751	0.820513	0.997669	0.414918
0.375427	0.38339	0.241183	0.225513	0.173121	0.166287	0.002275	0.292378	0.522184	0.74744	0.998862	0.015927	0.17975	0.409556	0.638225	0.997725	0.001138	0.301479	0.654152	0.821388	1	0.593857	0.035267	0.370876	0.019362	0.092255	0.007973	0.001138	0.220705	0.390216	0.546075	1	0.040956	0.094425	0.12628	0.229807	0.346985	0.012514	0.634812	0.761092	0.87372	0.992036	0.54835	0.394077	0.003413	0.226394	0.511945	0.757679	0.990899	0.362912
0.297872	0.421986	0.280142	0.225577	0.154529	0.273535	0.015957	0.255319	0.478723	0.822695	0.994681	0.003546	0.218085	0.5	0.675532	1	0.001773	0.278369	0.52305	0.776596	0.996454	0.601064	0.184397	0.214539	0.092362	0.053286	0	0.001773	0.281915	0.578014	0.730496	1	0.005319	0.242908	0.41844	0.835106	0.978723	0.033688	0.18617	0.384752	0.803191	0.985816	0.531915	0.273535	0.007092	0.27305	0.542553	0.723404	0.987589	0.434397
0.304553	0.414443	0.281005	0.215409	0.168239	0.254717	0.006279	0.194662	0.4427	0.816327	0.99529	0.00314	0.262166	0.511774	0.682889	1	0.00157	0.260597	0.510204	0.77865	0.99686	0.637363	0.139717	0.22292	0.06761	0.064465	0.001572	0.00157	0.21978	0.527473	0.693878	1	0.100471	0.277865	0.425432	0.850863	0.981162	0.023548	0.232339	0.44898	0.77865	0.956044	0.544741	0.279874	0.015699	0.362637	0.583987	0.728414	0.99686	0.437991
0.400915	0.306402	0.292683	0.225954	0.206107	0.174046	0.009146	0.179878	0.448171	0.757622	1	0.003049	0.256098	0.47561	0.731707	0.993902	0.001524	0.342988	0.570122	0.76372	0.998476	0.286585	0.004573	0.708841	0.00458	0.117557	0.001527	0.001524	0.152439	0.484756	0.817073	1	0.02439	0.02439	0.02439	0.045732	0.047256	0.022866	0.286585	0.501524	0.731707	0.996951	0.507622	0.39084	0.006098	0.32622	0.525915	0.746951	0.996951	0.318598
0.285955	0.465938	0.248108	0.237374	0.143098	0.207071	0.006728	0.222876	0.472666	0.79058	0.997477	0.001682	0.269975	0.485282	0.658537	0.998318	0.000841	0.262405	0.58032	0.813288	1	0.58873	0.052145	0.359125	0.030303	0.087542	0.005051	0.000841	0.213625	0.42725	0.6291	1	0.005887	0.158957	0.315391	0.476871	0.936081	0.002523	0.400336	0.742641	0.86291	0.981497	0.568545	0.316498	0.002523	0.283431	0.522288	0.728343	0.995795	0.46005
0.271363	0.517939	0.210698	0.213446	0.106397	0.203003	0.001305	0.251794	0.478147	0.761252	0.998043	0.003262	0.223744	0.480757	0.690802	0.997391	0.000652	0.304631	0.581213	0.811481	1	0.560339	0.048271	0.391389	0.031984	0.069843	0.001958	0.000652	0.227658	0.40574	0.660144	1	0.014351	0.282453	0.531637	0.947815	0.998695	0.020874	0.393346	0.617091	0.804305	0.947162	0.630789	0.278068	0.001957	0.22244	0.493803	0.73516	0.998695	0.502283
0.377049	0.306011	0.31694	0.214286	0.241758	0.236264	0.010929	0.229508	0.459016	0.775956	1	0.060109	0.256831	0.513661	0.748634	0.961749	0.005464	0.213115	0.480874	0.68306	0.978142	0.47541	0.284153	0.240437	0.098901	0.032967	0	0.005464	0.349727	0.513661	0.797814	1	0.021858	0.360656	0.579235	0.89071	0.983607	0.054645	0.10929	0.256831	0.617486	0.677596	0.513661	0.373626	0.038251	0.240437	0.519126	0.693989	0.978142	0.349727
0.382775	0.338517	0.278708	0.249102	0.215569	0.196407	0.007177	0.318182	0.549043	0.758373	0.995215	0.002392	0.194976	0.458134	0.740431	0.997608	0.001196	0.217703	0.482057	0.732057	1	0.618421	0.145933	0.235646	0.064671	0.088623	0	0.001196	0.282297	0.522727	0.759569	1	0.002392	0.216507	0.393541	0.61244	0.998804	0.019139	0.253589	0.498804	0.726077	0.982057	0.450957	0.419162	0.002392	0.202153	0.42823	0.696172	0.996411	0.366029
0.356164	0.383562	0.260274	0.282759	0.186207	0.2	0.041096	0.212329	0.506849	0.739726	0.972603	0.013699	0.239726	0.445205	0.712329	0.986301	0.006849	0.246575	0.59589	0.780822	1	0.486301	0.212329	0.30137	0.068966	0.055172	0	0.006849	0.267123	0.390411	0.650685	1	0.184932	0.458904	0.609589	0.80137	0.890411	0.034247	0.10274	0.541096	0.69863	0.965753	0.315068	0.441379	0.075342	0.438356	0.589041	0.760274	0.979452	0.363014
0.263369	0.495989	0.240642	0.261044	0.116466	0.239625	0.005348	0.160428	0.391711	0.691176	0.997326	0.002674	0.316845	0.576203	0.798128	0.990642	0.001337	0.216578	0.434492	0.681818	1	0.683155	0.112299	0.204545	0.053548	0.066934	0	0.001337	0.346257	0.614973	0.796791	1	0.006684	0.132353	0.229947	0.335561	0.969251	0.032086	0.201872	0.377005	0.506684	0.995989	0.475936	0.364123	0.006684	0.300802	0.510695	0.762032	0.991979	0.486631
0.2822	0.441389	0.276411	0.223188	0.153623	0.218841	0.01013	0.199711	0.435601	0.736614	0.997106	0.002894	0.267728	0.554269	0.778582	1	0.001447	0.250362	0.47178	0.685962	0.998553	0.603473	0.131693	0.264834	0.053623	0.065217	0.001449	0.001447	0.256151	0.578871	0.778582	1	0.005789	0.195369	0.273517	0.397974	0.985528	0.053546	0.290883	0.494935	0.6411	0.991317	0.513748	0.362319	0.007236	0.329957	0.541245	0.745297	0.991317	0.421129
0.359929	0.41844	0.221631	0.309059	0.152753	0.179396	0.005319	0.274823	0.489362	0.696809	0.996454	0.003546	0.265957	0.512411	0.72695	1	0.001773	0.189716	0.446809	0.810284	0.992908	0.638298	0.171986	0.189716	0.065719	0.044405	0.005329	0.001773	0.317376	0.491135	0.656028	1	0.019504	0.147163	0.324468	0.812057	0.994681	0.04078	0.191489	0.693262	0.886525	0.978723	0.379433	0.294849	0.01773	0.230496	0.402482	0.803191	0.994681	0.409574
0.285036	0.534442	0.180523	0.283333	0.116667	0.154762	0.004751	0.19715	0.384798	0.63658	0.995249	0.016627	0.406176	0.631829	0.814727	0.997625	0.002375	0.125891	0.299287	0.501188	1	0.726841	0.149644	0.123515	0.059524	0.035714	0.002381	0.002375	0.437055	0.619952	0.807601	1	0.019002	0.114014	0.230404	0.330166	0.928741	0.009501	0.066508	0.263658	0.35867	0.895487	0.638955	0.242857	0.016627	0.36342	0.591449	0.767221	0.988124	0.505938
0.267663	0.419837	0.3125	0.217687	0.170068	0.228571	0.008152	0.210598	0.411685	0.663043	1	0.002717	0.304348	0.581522	0.808424	0.995924	0.001359	0.21875	0.467391	0.710598	0.998641	0.578804	0.157609	0.263587	0.061224	0.066667	0.001361	0.001359	0.304348	0.581522	0.800272	1	0.009511	0.305707	0.485054	0.671196	0.995924	0.036685	0.160326	0.330163	0.633152	0.978261	0.523098	0.353741	0.009511	0.273098	0.576087	0.813859	0.998641	0.422554
0.361039	0.47013	0.168831	0.302083	0.125	0.127604	0.007792	0.212987	0.425974	0.690909	0.997403	0.005195	0.348052	0.633766	0.802597	1	0.002597	0.145455	0.34026	0.467532	0.981818	0.716883	0.155844	0.127273	0.059896	0.033854	0.002604	0.002597	0.387013	0.641558	0.820779	1	0.064935	0.168831	0.254545	0.405195	0.490909	0.054545	0.114286	0.27013	0.355844	0.509091	0.654545	0.197917	0.062338	0.412987	0.65974	0.823377	0.994805	0.496104
0.324841	0.469214	0.205945	0.234043	0.134043	0.174468	0.006369	0.218684	0.41189	0.647558	1	0.012739	0.397028	0.636943	0.823779	0.995754	0.002123	0.133758	0.318471	0.564756	0.974522	0.683652	0.144374	0.171975	0.061702	0.048936	0.002128	0.002123	0.36518	0.622081	0.815287	1	0.070064	0.159236	0.269639	0.360934	0.974522	0.04034	0.178344	0.309979	0.456476	0.794055	0.484076	0.323404	0.065817	0.326964	0.539278	0.683652	0.976645	0.454352
0.378902	0.444564	0.176534	0.307112	0.125	0.158405	0.002153	0.184069	0.474704	0.765339	1	0.003229	0.299247	0.515608	0.710441	0.998924	0.001076	0.272336	0.431647	0.782562	0.995694	0.65662	0.123789	0.219591	0.054957	0.048491	0.001078	0.001076	0.214209	0.487621	0.687836	1	0.139935	0.220667	0.359526	0.614639	0.960172	0.121636	0.386437	0.74704	0.847147	0.997847	0.398278	0.321121	0.003229	0.304629	0.477933	0.719053	0.998924	0.439182
0.216567	0.502994	0.280439	0.155844	0.135864	0.308691	0.005988	0.316367	0.478044	0.611776	0.996008	0.001996	0.233533	0.552894	0.769461	1	0.000998	0.231537	0.474052	0.720559	0.999002	0.737525	0.132735	0.129741	0.053946	0.033966	0	0.000998	0.243513	0.52994	0.763473	1	0.001996	0.287425	0.463074	0.615768	0.999002	0.015968	0.316367	0.449102	0.597804	0.98503	0.583832	0.337662	0.001996	0.261477	0.58982	0.795409	0.999002	0.503992
0.243647	0.603886	0.152466	0.293413	0.086826	0.164671	0.00299	0.198804	0.412556	0.811659	0.998505	0.008969	0.349776	0.553064	0.747384	0.994021	0.001495	0.104634	0.237668	0.587444	1	0.68012	0.09417	0.22571	0.041916	0.062874	0.002994	0.001495	0.307922	0.512706	0.753363	1	0.00299	0.058296	0.158445	0.212257	0.967115	0.022422	0.189836	0.626308	0.886398	0.989537	0.608371	0.335329	0.004484	0.328849	0.526158	0.733931	0.994021	0.556054
0.340839	0.458547	0.200614	0.260246	0.143443	0.17418	0.002047	0.25998	0.54043	0.734903	0.993859	0.003071	0.209826	0.463664	0.730809	0.997953	0.001024	0.322416	0.511771	0.823951	1	0.699079	0.138178	0.162743	0.052254	0.042008	0.009221	0.001024	0.203685	0.462641	0.692938	1	0.030706	0.243603	0.467758	0.86694	0.986694	0.016377	0.437052	0.711361	0.912999	0.998976	0.392016	0.286885	0.013306	0.288639	0.490276	0.811668	0.995906	0.489253
0.345397	0.398899	0.255704	0.258268	0.174803	0.219685	0.001574	0.250197	0.442958	0.804091	0.998426	0.00236	0.270653	0.536585	0.734854	1	0.000787	0.203777	0.488592	0.704957	0.993706	0.70417	0.060582	0.235248	0.037795	0.059843	0.00315	0.000787	0.338316	0.594807	0.795437	1	0.04878	0.399685	0.449253	0.641227	0.994493	0.001574	0.087333	0.20535	0.390244	0.976397	0.40834	0.370079	0.00236	0.284815	0.535012	0.738788	0.993706	0.422502
0.352632	0.384211	0.263158	0.306878	0.206349	0.169312	0.010526	0.247368	0.484211	0.747368	1	0.015789	0.263158	0.584211	0.826316	0.989474	0.005263	0.215789	0.389474	0.626316	0.978947	0.621053	0.157895	0.221053	0.068783	0.068783	0.005291	0.005263	0.184211	0.6	0.784211	1	0.136842	0.278947	0.384211	0.521053	0.973684	0.078947	0.236842	0.457895	0.747368	0.978947	0.347368	0.391534	0.131579	0.3	0.526316	0.805263	0.978947	0.363158
0.386458	0.371875	0.241667	0.273201	0.175182	0.187696	0.003125	0.217708	0.458333	0.747917	0.998958	0.002083	0.258333	0.504167	0.719792	0.996875	0.001042	0.317708	0.55	0.784375	1	0.507292	0.186458	0.30625	0.070907	0.077164	0.002086	0.001042	0.229167	0.414583	0.708333	1	0.003125	0.377083	0.5625	0.794792	0.986458	0.015625	0.222917	0.571875	0.75625	0.996875	0.389583	0.314911	0.002083	0.327083	0.545833	0.767708	0.997917	0.386458
0.322353	0.409412	0.268235	0.231132	0.188679	0.233491	0.018824	0.228235	0.435294	0.651765	0.990588	0.004706	0.329412	0.595294	0.837647	1	0.002353	0.188235	0.454118	0.687059	0.976471	0.644706	0.129412	0.225882	0.049528	0.063679	0.007075	0.002353	0.331765	0.569412	0.830588	1	0.051765	0.112941	0.390588	0.621176	0.710588	0.056471	0.228235	0.317647	0.576471	0.974118	0.529412	0.34434	0.023529	0.263529	0.583529	0.825882	0.985882	0.444706
0.388102	0.380548	0.23135	0.258034	0.175803	0.180529	0.003777	0.189802	0.527856	0.76865	1	0.007554	0.282342	0.450425	0.699717	0.997167	0.000944	0.309726	0.538244	0.759207	0.998111	0.654391	0.081209	0.2644	0.038752	0.067108	0.004726	0.000944	0.255902	0.444759	0.685552	1	0.082153	0.422096	0.580737	0.858357	0.964117	0.005666	0.128423	0.647781	0.786591	0.990557	0.341832	0.347826	0.002833	0.325779	0.552408	0.783758	0.983003	0.413598
0.21097	0.565401	0.223629	0.207627	0.09322	0.224576	0.016878	0.248945	0.396624	0.565401	1	0.021097	0.274262	0.590717	0.780591	0.983122	0.004219	0.202532	0.438819	0.628692	0.995781	0.759494	0.135021	0.105485	0.067797	0.033898	0	0.004219	0.341772	0.607595	0.810127	1	0.139241	0.253165	0.312236	0.409283	0.561181	0.084388	0.198312	0.223629	0.362869	0.751055	0.544304	0.305085	0.008439	0.375527	0.64557	0.793249	0.978903	0.527426
0.366038	0.381132	0.25283	0.26087	0.187146	0.21172	0.00566	0.145283	0.354717	0.650943	1	0.003774	0.275472	0.55283	0.773585	0.996226	0.001887	0.375472	0.562264	0.79434	0.992453	0.622642	0.160377	0.216981	0.058601	0.066163	0.00189	0.001887	0.184906	0.415094	0.726415	1	0.290566	0.420755	0.55283	0.811321	0.990566	0.007547	0.386792	0.579245	0.839623	0.984906	0.381132	0.3138	0.013208	0.401887	0.611321	0.813208	0.992453	0.403774
0.384988	0.336562	0.27845	0.228155	0.208738	0.196602	0.004843	0.254237	0.440678	0.7046	0.990315	0.014528	0.244552	0.539952	0.767554	1	0.002421	0.234867	0.501211	0.774818	0.992736	0.476998	0.133172	0.389831	0.048544	0.072816	0.004854	0.002421	0.251816	0.566586	0.801453	1	0.094431	0.53753	0.670702	0.830508	0.932203	0.029056	0.186441	0.358354	0.501211	0.895884	0.401937	0.398058	0.009685	0.280872	0.527845	0.765133	0.992736	0.338983
0.378687	0.355852	0.265461	0.260952	0.217143	0.202857	0.001903	0.221694	0.49001	0.736441	0.996194	0.002854	0.24548	0.47098	0.75452	1	0.000951	0.284491	0.533777	0.758325	0.994291	0.574691	0.137964	0.287345	0.069524	0.082857	0.012381	0.000951	0.2255	0.472883	0.745956	1	0.003806	0.23216	0.440533	0.771646	0.973359	0.031399	0.328259	0.579448	0.699334	0.995243	0.378687	0.447619	0.002854	0.276879	0.510942	0.778306	0.994291	0.392008
0.27685	0.505967	0.217184	0.236842	0.145933	0.215311	0.00716	0.21957	0.424821	0.747017	0.99284	0.016706	0.362768	0.575179	0.782816	1	0.002387	0.150358	0.334129	0.630072	0.968974	0.653938	0.133652	0.212411	0.047847	0.066986	0	0.002387	0.393795	0.572792	0.792363	1	0.00716	0.090692	0.188544	0.272076	0.565632	0.0358	0.221957	0.377088	0.761337	0.995227	0.639618	0.315789	0.004773	0.315036	0.536993	0.718377	0.990453	0.465394
0.395092	0.401227	0.203681	0.289926	0.153563	0.159705	0.004908	0.2	0.525153	0.771779	1	0.002454	0.295706	0.503067	0.692025	0.996319	0.001227	0.246626	0.408589	0.774233	0.998773	0.604908	0.130061	0.265031	0.056511	0.063882	0.002457	0.001227	0.218405	0.487117	0.69816	1	0.008589	0.177914	0.33865	0.569325	0.953374	0.136196	0.390184	0.70184	0.825767	0.997546	0.409816	0.307125	0.008589	0.299387	0.455215	0.688344	0.995092	0.420859
0.428317	0.385574	0.186109	0.303922	0.176471	0.123886	0.003562	0.259127	0.524488	0.771149	1	0.002671	0.215494	0.481745	0.71772	0.996438	0.00089	0.274265	0.482636	0.726625	0.99911	0.734639	0.097061	0.168299	0.048128	0.051693	0	0.00089	0.191451	0.394479	0.685663	1	0.065895	0.43366	0.58504	0.657168	0.966162	0.184328	0.545859	0.802315	0.881567	0.998219	0.398931	0.367201	0.010686	0.198575	0.446126	0.689225	0.99911	0.423865
0.349624	0.443609	0.206767	0.25283	0.184906	0.143396	0.026316	0.255639	0.541353	0.819549	0.996241	0.007519	0.327068	0.515038	0.729323	1	0.003759	0.139098	0.300752	0.567669	0.981203	0.684211	0.116541	0.199248	0.045283	0.060377	0	0.003759	0.338346	0.639098	0.827068	1	0.041353	0.139098	0.199248	0.304511	0.394737	0.086466	0.240602	0.481203	0.552632	0.808271	0.496241	0.316981	0.037594	0.263158	0.533835	0.774436	0.981203	0.413534
0.436782	0.350575	0.212644	0.33526	0.156069	0.150289	0.017241	0.218391	0.494253	0.758621	1	0.011494	0.258621	0.488506	0.729885	0.971264	0.005747	0.229885	0.45977	0.683908	0.867816	0.574713	0.178161	0.247126	0.121387	0.052023	0.00578	0.005747	0.247126	0.465517	0.816092	1	0.022989	0.431034	0.591954	0.695402	0.867816	0.04023	0.166667	0.298851	0.551724	0.770115	0.33908	0.346821	0.022989	0.287356	0.482759	0.678161	0.856322	0.385057
0.283753	0.487414	0.228833	0.243119	0.133028	0.213303	0.006865	0.228833	0.430206	0.677346	0.997712	0.004577	0.235698	0.553776	0.764302	1	0.002288	0.299771	0.498856	0.748284	0.961098	0.702517	0.141876	0.155606	0.057339	0.048165	0.002294	0.002288	0.281465	0.610984	0.789474	1	0.032037	0.210526	0.304348	0.421053	0.963387	0.048055	0.270023	0.437071	0.521739	0.938215	0.585812	0.330275	0.011442	0.322654	0.592677	0.750572	0.988558	0.462243
0.45092	0.392638	0.156442	0.378462	0.12	0.098462	0.006135	0.315951	0.527607	0.760736	0.993865	0.009202	0.340491	0.625767	0.834356	1	0.003067	0.113497	0.199387	0.312883	0.745399	0.671779	0.101227	0.226994	0.067692	0.092308	0	0.003067	0.346626	0.558282	0.757669	1	0.052147	0.122699	0.233129	0.325153	0.518405	0.01227	0.171779	0.47546	0.806748	0.98773	0.220859	0.276923	0.009202	0.156442	0.257669	0.441718	0.97546	0.380368
0.35473	0.572635	0.072635	0.351946	0.05753	0.052453	0.005068	0.233108	0.447635	0.689189	0.996622	0.003378	0.228041	0.552365	0.790541	1	0.001689	0.407095	0.486486	0.548986	0.974662	0.902027	0.050676	0.047297	0.027073	0.013536	0	0.001689	0.239865	0.547297	0.773649	1	0.059122	0.403716	0.461149	0.488176	0.628378	0.14527	0.157095	0.427365	0.5	0.511824	0.570946	0.368866	0.011824	0.293919	0.554054	0.798986	0.996622	0.569257
0.391685	0.40919	0.199125	0.313596	0.16886	0.125	0.010941	0.260394	0.424508	0.63895	0.997812	0.004376	0.33698	0.634573	0.798687	0.978118	0.002188	0.137856	0.310722	0.682713	1	0.689278	0.113786	0.196937	0.054825	0.050439	0.002193	0.002188	0.330416	0.59081	0.785558	1	0.159737	0.310722	0.654267	0.816193	0.989059	0.026258	0.080963	0.21663	0.391685	0.608315	0.396061	0.350877	0.008753	0.183807	0.63895	0.761488	0.989059	0.396061
0.318623	0.43248	0.248897	0.242049	0.174912	0.218198	0.00353	0.247132	0.507502	0.76346	0.992056	0.001765	0.313327	0.541041	0.759047	1	0.000883	0.181818	0.399823	0.699029	0.994704	0.640777	0.059135	0.300088	0.036219	0.060954	0.00265	0.000883	0.40865	0.578994	0.768756	1	0.007944	0.227714	0.739629	0.793469	0.954987	0.031774	0.157988	0.269197	0.390997	0.969991	0.424537	0.392226	0.002648	0.217123	0.445719	0.721977	0.978817	0.43248
0.328571	0.332143	0.339286	0.207885	0.229391	0.240143	0.007143	0.3	0.571429	0.803571	0.989286	0.046429	0.235714	0.439286	0.642857	1	0.003571	0.189286	0.482143	0.760714	0.992857	0.392857	0.217857	0.389286	0.064516	0.078853	0.014337	0.003571	0.307143	0.564286	0.832143	1	0.010714	0.078571	0.246429	0.585714	0.896429	0.110714	0.296429	0.475	0.75	0.985714	0.492857	0.444444	0.010714	0.242857	0.467857	0.721429	0.992857	0.375
0.295082	0.352459	0.352459	0.194521	0.227397	0.243836	0.016393	0.20765	0.540984	0.756831	0.997268	0.005464	0.26776	0.453552	0.674863	0.991803	0.002732	0.251366	0.513661	0.762295	1	0.404372	0.128415	0.467213	0.063014	0.079452	0.00274	0.002732	0.270492	0.494536	0.655738	1	0.010929	0.068306	0.513661	0.931694	0.986339	0.092896	0.245902	0.483607	0.743169	0.893443	0.63388	0.334247	0.010929	0.26776	0.491803	0.724044	0.991803	0.42623
0.303644	0.4278	0.268556	0.262162	0.167568	0.228378	0.002699	0.218623	0.495277	0.723347	0.993252	0.013495	0.246964	0.483131	0.734143	1	0.00135	0.299595	0.516869	0.77193	0.997301	0.618084	0.132254	0.249663	0.052703	0.05	0.001351	0.00135	0.224022	0.461538	0.695007	1	0.126856	0.357625	0.573549	0.746289	0.881242	0.008097	0.379217	0.541161	0.898785	0.991903	0.475034	0.337838	0.012146	0.358974	0.593792	0.77193	0.997301	0.437247
0.293566	0.412869	0.293566	0.237584	0.17047	0.245638	0.012064	0.219839	0.461126	0.706434	0.993298	0.002681	0.245308	0.5	0.773458	0.99866	0.00134	0.272118	0.522788	0.75067	1	0.580429	0.143432	0.276139	0.061745	0.051007	0	0.00134	0.189008	0.411528	0.702413	1	0.005362	0.422252	0.630027	0.74933	0.99866	0.030831	0.266756	0.512064	0.806971	0.990617	0.462466	0.327517	0.005362	0.344504	0.591153	0.774799	0.997319	0.41555
0.390244	0.34334	0.266417	0.229323	0.24812	0.171053	0.013133	0.247655	0.478424	0.748593	0.994371	0.003752	0.292683	0.527205	0.742964	1	0.001876	0.212008	0.474672	0.756098	0.998124	0.562852	0.135084	0.302064	0.06015	0.067669	0.007519	0.001876	0.35272	0.555347	0.818011	1	0.015009	0.566604	0.688555	0.786116	0.981238	0.018762	0.140713	0.253283	0.472795	0.938086	0.35272	0.417293	0.009381	0.21576	0.529081	0.793621	0.979362	0.377111
0.401639	0.229508	0.368852	0.165289	0.272727	0.247934	0.02459	0.229508	0.491803	0.737705	1	0.040984	0.270492	0.47541	0.754098	0.991803	0.008197	0.254098	0.459016	0.704918	0.983607	0.418033	0.286885	0.295082	0.140496	0.057851	0.008264	0.008197	0.286885	0.680328	0.819672	1	0.016393	0.204918	0.319672	0.696721	0.95082	0.090164	0.155738	0.532787	0.606557	0.909836	0.442623	0.46281	0.016393	0.262295	0.442623	0.680328	0.983607	0.237705
0.476891	0.348739	0.17437	0.267368	0.168421	0.107368	0.004202	0.336134	0.537815	0.754202	1	0.006303	0.193277	0.44958	0.779412	0.997899	0.002101	0.210084	0.359244	0.594538	0.966387	0.563025	0.077731	0.359244	0.031579	0.098947	0.002105	0.002101	0.212185	0.579832	0.785714	1	0.142857	0.205882	0.243697	0.313025	0.968487	0.023109	0.378151	0.497899	0.75	0.995798	0.247899	0.231579	0.016807	0.182773	0.283613	0.441176	0.970588	0.371849
0.563147	0.26501	0.171843	0.217842	0.157676	0.09751	0.004141	0.325052	0.544513	0.763975	1	0.014493	0.173913	0.36646	0.797101	0.995859	0.00207	0.20911	0.397516	0.587992	0.981366	0.540373	0.072464	0.387164	0.026971	0.093361	0.006224	0.00207	0.21118	0.608696	0.832298	1	0.026915	0.109731	0.196687	0.248447	0.556936	0.010352	0.380952	0.490683	0.73706	0.975155	0.256729	0.215768	0.028986	0.161491	0.250518	0.42029	0.981366	0.302277
0.446541	0.279088	0.274371	0.223446	0.211644	0.174666	0.003145	0.198899	0.451258	0.779088	1	0.001572	0.258648	0.507862	0.745283	0.997642	0.000786	0.301887	0.538522	0.724843	0.994497	0.40173	0.043239	0.555031	0.01967	0.09048	0.005507	0.000786	0.333333	0.562107	0.830189	1	0.033019	0.524371	0.860849	0.922956	0.995283	0.032233	0.194969	0.464623	0.654874	0.970912	0.397799	0.352478	0.013365	0.290881	0.538522	0.704403	0.996069	0.31761
0.43609	0.353383	0.210526	0.219697	0.181818	0.159091	0.015038	0.210526	0.451128	0.631579	1	0.022556	0.360902	0.609023	0.819549	0.984962	0.007519	0.157895	0.511278	0.721805	0.977444	0.609023	0.120301	0.270677	0.060606	0.060606	0	0.007519	0.255639	0.406015	0.81203	1	0.045113	0.067669	0.135338	0.24812	0.969925	0.180451	0.496241	0.56391	0.729323	0.796992	0.368421	0.257576	0.030075	0.135338	0.503759	0.714286	0.962406	0.398496
0.478788	0.284848	0.236364	0.262195	0.22561	0.115854	0.018182	0.157576	0.478788	0.745455	0.987879	0.012121	0.333333	0.448485	0.8	0.993939	0.006061	0.254545	0.515152	0.70303	1	0.436364	0.006061	0.557576	0.012195	0.121951	0	0.006061	0.212121	0.418182	0.806061	1	0.921212	0.921212	0.921212	0.921212	0.921212	0.030303	0.272727	0.533333	0.672727	0.987879	0.327273	0.353659	0.042424	0.351515	0.551515	0.69697	0.927273	0.315152
0.413408	0.385475	0.201117	0.292135	0.134831	0.191011	0.011173	0.206704	0.458101	0.73743	0.988827	0.01676	0.324022	0.530726	0.748603	0.994413	0.005587	0.27933	0.452514	0.709497	1	0.670391	0.027933	0.301676	0.011236	0.044944	0	0.005587	0.469274	0.664804	0.832402	1	0.636872	0.636872	0.642458	0.648045	0.659218	0.039106	0.106145	0.24581	0.318436	0.458101	0.329609	0.325843	0.055866	0.26257	0.452514	0.664804	0.972067	0.430168
0.375587	0.422535	0.201878	0.292453	0.150943	0.193396	0.014085	0.183099	0.483568	0.699531	0.985915	0.023474	0.29108	0.619718	0.798122	1	0.004695	0.201878	0.441315	0.671362	0.892019	0.657277	0.056338	0.286385	0.033019	0.061321	0.004717	0.004695	0.28169	0.610329	0.807512	1	0.244131	0.253521	0.666667	0.774648	0.896714	0.051643	0.169014	0.455399	0.535211	0.882629	0.338028	0.386792	0.089202	0.309859	0.558685	0.812207	0.967136	0.450704
0.379032	0.419355	0.201613	0.341463	0.170732	0.130081	0.032258	0.217742	0.395161	0.653226	1	0.016129	0.258065	0.556452	0.830645	0.983871	0.008065	0.16129	0.483871	0.66129	0.951613	0.572581	0.048387	0.379032	0.056911	0.04065	0.00813	0.008065	0.258065	0.669355	0.814516	1	0.66129	0.66129	0.879032	0.887097	0.951613	0.080645	0.16129	0.33871	0.435484	0.653226	0.346774	0.406504	0.104839	0.193548	0.459677	0.677419	0.951613	0.435484
0.437126	0.353293	0.209581	0.26506	0.186747	0.156627	0.023952	0.221557	0.467066	0.718563	1	0.011976	0.305389	0.473054	0.766467	0.994012	0.005988	0.185629	0.502994	0.682635	0.934132	0.634731	0.011976	0.353293	0.012048	0.084337	0	0.005988	0.281437	0.556886	0.748503	1	0.335329	0.335329	0.335329	0.335329	0.341317	0.125749	0.209581	0.491018	0.664671	0.91018	0.317365	0.313253	0.077844	0.353293	0.520958	0.676647	0.934132	0.359281
0.377939	0.298373	0.323689	0.21558	0.23913	0.20471	0.003617	0.218807	0.504521	0.768535	1	0.009042	0.253165	0.495479	0.748644	0.996383	0.001808	0.25859	0.479204	0.721519	0.998192	0.491863	0.133816	0.374322	0.059783	0.077899	0.001812	0.001808	0.218807	0.396022	0.696203	1	0.018083	0.40868	0.459313	0.576854	0.998192	0.065099	0.251356	0.638336	0.820976	0.981917	0.468354	0.384058	0.019892	0.282098	0.497288	0.725136	0.998192	0.334539
0.316731	0.338442	0.344828	0.19821	0.234015	0.240409	0.002554	0.236271	0.480204	0.716475	0.987229	0.003831	0.256705	0.514687	0.786718	1	0.001277	0.254151	0.500639	0.739464	0.998723	0.492976	0.149425	0.357599	0.063939	0.084399	0.002558	0.001277	0.206897	0.41507	0.744572	1	0.068966	0.305236	0.606641	0.795658	0.987229	0.019157	0.401022	0.547893	0.740741	0.974457	0.50447	0.363171	0.019157	0.293742	0.485313	0.749681	0.993614	0.355045
0.413462	0.311298	0.27524	0.202166	0.198556	0.20698	0.00601	0.183894	0.469952	0.786058	1	0.003606	0.269231	0.502404	0.716346	0.992788	0.001202	0.319712	0.550481	0.746394	0.987981	0.498798	0.122596	0.378606	0.048135	0.079422	0.00722	0.001202	0.140625	0.336538	0.645433	1	0.078125	0.371394	0.557692	0.670673	0.987981	0.010817	0.391827	0.649038	0.828125	0.984375	0.430288	0.305656	0.032452	0.292067	0.504808	0.697115	0.987981	0.347356
0.386567	0.337313	0.276119	0.237668	0.192825	0.170404	0.01791	0.241791	0.574627	0.810448	0.998507	0.002985	0.185075	0.425373	0.716418	1	0.001493	0.316418	0.492537	0.679104	0.997015	0.502985	0.114925	0.38209	0.049327	0.085202	0.004484	0.001493	0.176119	0.532836	0.773134	1	0.031343	0.302985	0.459701	0.6	0.995522	0.002985	0.274627	0.501493	0.777612	0.956716	0.456716	0.337818	0.004478	0.255224	0.428358	0.68209	0.958209	0.383582
0.343186	0.35468	0.302135	0.228618	0.182566	0.213816	0.003284	0.293924	0.505747	0.758621	0.998358	0.006568	0.211823	0.490969	0.766831	1	0.001642	0.256158	0.495895	0.727422	0.981938	0.446634	0.134647	0.418719	0.049342	0.085526	0.006579	0.001642	0.238095	0.472906	0.719212	1	0.027915	0.229885	0.422003	0.661741	0.954023	0.050903	0.249589	0.536946	0.809524	0.986864	0.500821	0.345395	0.013136	0.226601	0.464696	0.701149	0.934319	0.357964
0.366306	0.346213	0.287481	0.232198	0.19969	0.198142	0.021638	0.318393	0.619784	0.843895	1	0.003091	0.18238	0.462133	0.695518	0.995363	0.001546	0.222566	0.446677	0.658423	0.982998	0.446677	0.125193	0.42813	0.049536	0.080495	0.003096	0.001546	0.242658	0.542504	0.771252	1	0.097372	0.238022	0.386399	0.528594	0.982998	0.035549	0.248841	0.514683	0.791345	0.967543	0.459042	0.356037	0.027821	0.216383	0.418856	0.598145	0.982998	0.378671
0.31094	0.370441	0.318618	0.240385	0.205769	0.242308	0.015355	0.307102	0.556622	0.771593	0.998081	0.007678	0.236084	0.491363	0.775432	1	0.001919	0.21881	0.441459	0.683301	0.996161	0.429942	0.153551	0.416507	0.053846	0.076923	0.015385	0.001919	0.170825	0.476008	0.754319	1	0.038388	0.357006	0.577735	0.715931	0.857965	0.072937	0.25144	0.491363	0.742802	0.975048	0.558541	0.357692	0.003839	0.234165	0.462572	0.68906	0.950096	0.385797
0.433424	0.338315	0.228261	0.236735	0.165986	0.172789	0.002717	0.173913	0.360054	0.680707	0.991848	0.005435	0.302989	0.535326	0.797554	1	0.001359	0.403533	0.600543	0.773098	0.994565	0.494565	0.127717	0.377717	0.05034	0.088435	0.004082	0.001359	0.186141	0.394022	0.695652	1	0.016304	0.487772	0.701087	0.857337	0.997283	0.021739	0.308424	0.509511	0.767663	0.970109	0.451087	0.304762	0.01087	0.411685	0.58288	0.789402	0.997283	0.407609
0.427123	0.328264	0.244613	0.269036	0.168782	0.170051	0.010139	0.188847	0.564005	0.81749	1	0.002535	0.237009	0.47782	0.716096	0.996198	0.001267	0.30545	0.453739	0.65019	0.988593	0.528517	0.105196	0.366286	0.040609	0.098985	0.005076	0.001267	0.157161	0.466413	0.813688	1	0.007605	0.343473	0.471483	0.590621	0.752852	0.021546	0.328264	0.543726	0.727503	0.975919	0.387833	0.294416	0.003802	0.304183	0.448669	0.619772	0.993663	0.380228
0.377203	0.359577	0.26322	0.289412	0.196471	0.188235	0.003525	0.303173	0.589894	0.804935	1	0.00235	0.19624	0.473561	0.772033	0.998825	0.001175	0.245593	0.427732	0.626322	0.992949	0.475911	0.115159	0.408931	0.048235	0.092941	0.005882	0.001175	0.26322	0.59577	0.835488	1	0.042303	0.229142	0.346651	0.459459	0.811986	0.024677	0.251469	0.502938	0.668625	0.943596	0.413631	0.329412	0.0047	0.20564	0.379553	0.596945	0.992949	0.374853
0.386805	0.331177	0.282018	0.244819	0.224093	0.176166	0.002587	0.296248	0.56533	0.805951	0.996119	0.005175	0.163001	0.454075	0.717982	1	0.001294	0.27555	0.468305	0.676585	0.997413	0.457956	0.119017	0.423027	0.049223	0.082902	0.005181	0.001294	0.151358	0.508409	0.745149	1	0.086675	0.269082	0.39586	0.534282	0.956016	0.056921	0.30401	0.567917	0.807245	0.997413	0.438551	0.352332	0.010349	0.240621	0.428202	0.610608	0.997413	0.362225
0.349112	0.352663	0.298225	0.218009	0.204976	0.218009	0.007101	0.23432	0.433136	0.71716	1	0.002367	0.228402	0.491124	0.759763	0.99645	0.001183	0.293491	0.553846	0.757396	0.997633	0.512426	0.102959	0.384615	0.0391	0.074645	0.003555	0.001183	0.247337	0.376331	0.624852	1	0.033136	0.576331	0.700592	0.785799	0.99645	0.00355	0.182249	0.586982	0.804734	0.984615	0.459172	0.381517	0.005917	0.336095	0.583432	0.782249	0.995266	0.391716
0.358416	0.346535	0.29505	0.248016	0.202381	0.19246	0.005941	0.281188	0.562376	0.772277	1	0.00396	0.160396	0.374257	0.710891	0.994059	0.00198	0.338614	0.540594	0.746535	0.99802	0.485149	0.156436	0.358416	0.053571	0.069444	0.005952	0.00198	0.120792	0.334653	0.687129	1	0.172277	0.445545	0.615842	0.79802	0.914851	0.20198	0.368317	0.544554	0.776238	0.99604	0.522772	0.353175	0.013861	0.322772	0.512871	0.752475	0.99604	0.39604
0.3216	0.4112	0.2672	0.261218	0.184295	0.185897	0.0144	0.3024	0.5488	0.7776	0.9968	0.0032	0.2128	0.48	0.7888	1	0.0016	0.2592	0.4512	0.6736	0.9808	0.5424	0.1472	0.3104	0.049679	0.072115	0.008013	0.0016	0.2048	0.5344	0.856	1	0.016	0.384	0.5472	0.6992	0.9776	0.0048	0.2304	0.432	0.6176	0.8416	0.4704	0.278846	0.0096	0.2528	0.4288	0.6368	0.984	0.432
0.475129	0.307033	0.217839	0.248927	0.183691	0.142489	0.001715	0.144082	0.324185	0.642367	0.996569	0.005146	0.370497	0.614923	0.846484	0.998285	0.000858	0.435678	0.593482	0.754717	1	0.505146	0.107204	0.38765	0.046352	0.077253	0.00515	0.000858	0.20669	0.392796	0.686106	1	0.002573	0.543739	0.64494	0.750429	0.999142	0.012864	0.251286	0.556604	0.805317	0.988851	0.349914	0.291845	0.006861	0.483705	0.61235	0.755575	0.997427	0.367067
0.317627	0.373473	0.308901	0.237762	0.197552	0.237762	0.00349	0.25829	0.511344	0.776614	1	0.006981	0.239092	0.486911	0.712042	0.989529	0.001745	0.240838	0.506108	0.759162	0.998255	0.488656	0.17801	0.333333	0.066434	0.073427	0.01049	0.001745	0.172775	0.418848	0.677138	1	0.005236	0.376963	0.631763	0.762653	0.933682	0.017452	0.315881	0.516579	0.78534	0.99651	0.535777	0.332168	0.005236	0.286213	0.47993	0.762653	0.986038	0.385689
0.356989	0.322581	0.32043	0.200431	0.213362	0.221983	0.004301	0.288172	0.516129	0.862366	0.997849	0.006452	0.191398	0.466667	0.705376	0.978495	0.002151	0.245161	0.492473	0.686022	1	0.490323	0.139785	0.369892	0.05819	0.084052	0.006466	0.002151	0.288172	0.670968	0.877419	1	0.010753	0.255914	0.423656	0.634409	0.748387	0.036559	0.223656	0.397849	0.565591	0.862366	0.509677	0.323276	0.008602	0.217204	0.412903	0.64086	0.995699	0.363441
0.273305	0.364407	0.362288	0.218684	0.176221	0.239915	0.008475	0.298729	0.548729	0.788136	0.993644	0.004237	0.209746	0.442797	0.733051	0.987288	0.002119	0.271186	0.485169	0.709746	1	0.423729	0.184322	0.391949	0.055202	0.089172	0.008493	0.002119	0.15678	0.42161	0.745763	1	0.129237	0.383475	0.612288	0.786017	0.949153	0.004237	0.275424	0.514831	0.735169	0.987288	0.567797	0.369427	0.010593	0.307203	0.5	0.756356	0.995763	0.375
0.308029	0.39854	0.293431	0.230994	0.185673	0.219298	0.013139	0.143066	0.420438	0.686131	1	0.00292	0.306569	0.563504	0.807299	0.99708	0.00146	0.277372	0.458394	0.712409	0.941606	0.519708	0.141606	0.338686	0.054094	0.068713	0.004386	0.00146	0.134307	0.464234	0.805839	1	0.005839	0.347445	0.490511	0.648175	0.916788	0.159124	0.332847	0.543066	0.731387	0.90219	0.50073	0.345029	0.00438	0.29927	0.510949	0.722628	0.979562	0.445255
0.27707	0.463376	0.259554	0.239234	0.140351	0.23445	0.009554	0.257962	0.466561	0.66879	0.988854	0.003185	0.237261	0.574841	0.835987	1	0.001592	0.248408	0.431529	0.656051	0.995223	0.55414	0.130573	0.315287	0.047847	0.060606	0.00319	0.001592	0.261146	0.625796	0.861465	1	0.133758	0.351911	0.487261	0.627389	0.708599	0.003185	0.205414	0.401274	0.600318	0.769108	0.558917	0.341308	0.003185	0.278662	0.506369	0.737261	0.996815	0.484076
0.379791	0.324913	0.295296	0.236269	0.204882	0.186574	0.002613	0.189895	0.455575	0.749129	0.999129	0.001742	0.256969	0.506969	0.71777	1	0.000871	0.301394	0.539199	0.786585	0.994774	0.389373	0.12108	0.489547	0.040105	0.083697	0.001744	0.000871	0.267422	0.517422	0.766551	1	0.221254	0.341463	0.528746	0.813589	0.993902	0.010453	0.195993	0.459059	0.74216	0.981707	0.481707	0.322581	0.013066	0.319686	0.544425	0.762195	0.994774	0.355401
0.396552	0.258621	0.344828	0.210526	0.298246	0.140351	0.034483	0.155172	0.5	0.689655	1	0.068966	0.189655	0.431034	0.741379	0.896552	0.017241	0.275862	0.586207	0.775862	0.982759	0.310345	0.155172	0.534483	0.052632	0.122807	0.017544	0.017241	0.172414	0.413793	0.775862	1	0.034483	0.844828	0.87931	0.913793	0.965517	0.051724	0.206897	0.448276	0.62069	0.758621	0.482759	0.561404	0.051724	0.310345	0.586207	0.741379	0.982759	0.344828
0.351946	0.368866	0.279188	0.262712	0.205085	0.20678	0.003384	0.169205	0.423012	0.690355	0.998308	0.006768	0.307953	0.558376	0.778342	1	0.001692	0.277496	0.507614	0.771574	0.98308	0.516074	0.245347	0.238579	0.09661	0.049153	0.005085	0.001692	0.260575	0.519459	0.763113	1	0.093063	0.279188	0.467005	0.780034	0.984772	0.01692	0.179357	0.582064	0.725888	0.947547	0.509306	0.359322	0.015228	0.331641	0.546531	0.783418	0.986464	0.387479
0.312775	0.396476	0.290749	0.212389	0.199115	0.230088	0.008811	0.277533	0.506608	0.722467	1	0.013216	0.154185	0.475771	0.762115	0.995595	0.004405	0.286344	0.502203	0.726872	0.969163	0.348018	0.140969	0.511013	0.048673	0.084071	0.004425	0.004405	0.105727	0.30837	0.585903	1	0.013216	0.321586	0.444934	0.678414	0.726872	0.176211	0.365639	0.621145	0.85022	0.977974	0.488987	0.433628	0.013216	0.30837	0.515419	0.731278	0.951542	0.365639
0.254464	0.428571	0.316964	0.188341	0.170404	0.242152	0.013393	0.330357	0.59375	0.78125	0.986607	0.008929	0.183036	0.415179	0.683036	0.950893	0.004464	0.227679	0.549107	0.772321	1	0.5	0.178571	0.321429	0.058296	0.085202	0.004484	0.004464	0.142857	0.330357	0.633929	1	0.026786	0.339286	0.5625	0.620536	0.9375	0.09375	0.495536	0.6875	0.870536	0.991071	0.459821	0.466368	0.022321	0.245536	0.473214	0.6875	0.991071	0.473214
0.291005	0.449735	0.259259	0.207447	0.18617	0.260638	0.058201	0.333333	0.62963	0.851852	0.978836	0.010582	0.179894	0.417989	0.608466	0.989418	0.005291	0.275132	0.455026	0.730159	1	0.375661	0.132275	0.492063	0.053191	0.085106	0	0.005291	0.126984	0.248677	0.502646	1	0.15873	0.26455	0.666667	0.867725	0.994709	0.015873	0.407407	0.566138	0.761905	0.962963	0.460317	0.393617	0.015873	0.174603	0.417989	0.666667	0.984127	0.486772
0.3	0.429412	0.270588	0.260355	0.16568	0.224852	0.088235	0.323529	0.488235	0.735294	0.994118	0.011765	0.217647	0.511765	0.752941	0.982353	0.005882	0.176471	0.464706	0.723529	1	0.405882	0.235294	0.358824	0.076923	0.076923	0.005917	0.005882	0.188235	0.423529	0.694118	1	0.058824	0.176471	0.470588	0.570588	0.858824	0.1	0.352941	0.652941	0.782353	0.970588	0.535294	0.284024	0.023529	0.164706	0.470588	0.729412	0.988235	0.417647
0.334764	0.347639	0.317597	0.215517	0.211207	0.25	0.017167	0.309013	0.506438	0.738197	1	0.008584	0.23176	0.429185	0.716738	0.991416	0.004292	0.2103	0.527897	0.776824	0.995708	0.540773	0.27897	0.180258	0.094828	0.051724	0.008621	0.004292	0.167382	0.381974	0.622318	1	0.042918	0.334764	0.695279	0.793991	0.991416	0.021459	0.44206	0.540773	0.583691	0.961373	0.416309	0.396552	0.021459	0.227468	0.527897	0.776824	0.957082	0.347639
0.329545	0.386364	0.284091	0.230769	0.230769	0.205128	0.053977	0.289773	0.480114	0.752841	0.997159	0.005682	0.224432	0.5	0.732955	1	0.002841	0.230114	0.536932	0.767045	0.977273	0.471591	0.170455	0.357955	0.076923	0.082621	0.008547	0.002841	0.241477	0.431818	0.71875	1	0.190341	0.446023	0.590909	0.8125	0.960227	0.022727	0.196023	0.5625	0.747159	0.994318	0.448864	0.404558	0.011364	0.210227	0.502841	0.735795	0.974432	0.411932
0.354331	0.314961	0.330709	0.246032	0.285714	0.18254	0.015748	0.204724	0.464567	0.724409	1	0.086614	0.275591	0.480315	0.795276	0.984252	0.007874	0.23622	0.511811	0.700787	0.952756	0.472441	0.488189	0.03937	0.15873	0.015873	0	0.007874	0.307087	0.543307	0.795276	1	0.102362	0.251969	0.488189	0.700787	0.937008	0.023622	0.023622	0.031496	0.03937	0.055118	0.370079	0.47619	0.031496	0.181102	0.456693	0.700787	0.952756	0.354331
0.297143	0.411429	0.291429	0.293103	0.172414	0.201149	0.022857	0.365714	0.571429	0.805714	1	0.011429	0.194286	0.377143	0.691429	0.994286	0.005714	0.245714	0.497143	0.754286	0.971429	0.28	0.28	0.44	0.04023	0.109195	0.017241	0.005714	0.154286	0.285714	0.588571	1	0.234286	0.76	0.828571	0.908571	0.982857	0.011429	0.2	0.445714	0.577143	0.748571	0.445714	0.505747	0.017143	0.262857	0.497143	0.691429	0.971429	0.434286
0.336207	0.327586	0.336207	0.234783	0.234783	0.2	0.017241	0.206897	0.474138	0.681034	0.965517	0.051724	0.275862	0.517241	0.741379	0.982759	0.008621	0.232759	0.465517	0.758621	1	0.224138	0.422414	0.353448	0.052174	0.052174	0.017391	0.008621	0.051724	0.284483	0.577586	1	0.068966	0.655172	0.758621	0.87931	0.991379	0.172414	0.25	0.37069	0.5	0.637931	0.482759	0.486957	0.077586	0.25	0.482759	0.706897	0.982759	0.327586
0.336683	0.336683	0.326633	0.227273	0.207071	0.207071	0.025126	0.226131	0.487437	0.738693	0.98995	0.01005	0.211055	0.437186	0.703518	0.984925	0.005025	0.266332	0.527638	0.788945	1	0.301508	0.276382	0.422111	0.035354	0.075758	0.015152	0.005025	0.115578	0.351759	0.81407	1	0.055276	0.180905	0.537688	0.61809	0.688442	0.150754	0.326633	0.482412	0.849246	0.984925	0.517588	0.393939	0.020101	0.261307	0.507538	0.79397	0.984925	0.311558
0.270833	0.34375	0.385417	0.2	0.221053	0.284211	0.020833	0.166667	0.364583	0.614583	0.979167	0.041667	0.25	0.552083	0.71875	0.96875	0.010417	0.28125	0.5	0.802083	1	0.46875	0.322917	0.208333	0.147368	0.042105	0	0.010417	0.229167	0.614583	0.84375	1	0.041667	0.270833	0.552083	0.78125	0.90625	0.125	0.166667	0.354167	0.40625	0.458333	0.34375	0.378947	0.041667	0.1875	0.416667	0.5625	0.927083	0.260417
0.419355	0.236559	0.344086	0.163043	0.336957	0.152174	0.021505	0.204301	0.44086	0.677419	0.989247	0.107527	0.247312	0.569892	0.752688	1	0.010753	0.258065	0.462366	0.817204	0.967742	0.451613	0.333333	0.215054	0.173913	0.043478	0	0.010753	0.301075	0.677419	0.870968	1	0.032258	0.247312	0.537634	0.709677	0.924731	0.11828	0.16129	0.354839	0.408602	0.462366	0.387097	0.413043	0.032258	0.236559	0.462366	0.784946	0.956989	0.236559
0.402299	0.229885	0.367816	0.244186	0.360465	0.127907	0.034483	0.241379	0.425287	0.666667	0.977011	0.126437	0.264368	0.655172	0.770115	0.931034	0.011494	0.172414	0.494253	0.804598	1	0.45977	0.310345	0.229885	0.116279	0.046512	0	0.011494	0.241379	0.666667	0.804598	1	0.045977	0.275862	0.574713	0.712644	0.896552	0.137931	0.183908	0.390805	0.448276	0.505747	0.344828	0.395349	0.045977	0.16092	0.448276	0.597701	0.965517	0.218391
0.413043	0.25	0.336957	0.153846	0.296703	0.241758	0.021739	0.217391	0.434783	0.695652	1	0.076087	0.23913	0.456522	0.717391	0.956522	0.01087	0.184783	0.51087	0.804348	0.98913	0.445652	0.336957	0.217391	0.175824	0.043956	0	0.01087	0.315217	0.641304	0.771739	1	0.032609	0.23913	0.532609	0.793478	0.923913	0.119565	0.163043	0.358696	0.413043	0.467391	0.369565	0.395604	0.032609	0.184783	0.456522	0.771739	0.945652	0.228261
0.37	0.28	0.35	0.191919	0.292929	0.212121	0.07	0.24	0.43	0.72	0.92	0.03	0.22	0.57	0.69	0.98	0.01	0.18	0.47	0.84	1	0.45	0.29	0.26	0.141414	0.060606	0	0.01	0.19	0.64	0.78	1	0.17	0.34	0.6	0.83	0.96	0.07	0.12	0.26	0.45	0.52	0.4	0.383838	0.04	0.19	0.45	0.62	0.97	0.26
0.367816	0.275862	0.356322	0.255814	0.290698	0.186047	0.034483	0.252874	0.482759	0.770115	1	0.126437	0.275862	0.574713	0.747126	0.965517	0.011494	0.114943	0.413793	0.643678	0.988506	0.448276	0.321839	0.229885	0.139535	0.046512	0	0.011494	0.229885	0.643678	0.793103	1	0.045977	0.298851	0.597701	0.816092	0.954023	0.137931	0.183908	0.390805	0.448276	0.505747	0.367816	0.418605	0.045977	0.206897	0.45977	0.62069	0.977011	0.321839
0.354545	0.336364	0.309091	0.275229	0.220183	0.211009	0.018182	0.190909	0.436364	0.709091	0.990909	0.027273	0.290909	0.545455	0.781818	1	0.009091	0.2	0.472727	0.654545	0.972727	0.527273	0.227273	0.245455	0.091743	0.073394	0	0.009091	0.127273	0.445455	0.8	1	0.372727	0.590909	0.645455	0.763636	0.890909	0.145455	0.2	0.318182	0.5	0.563636	0.372727	0.422018	0.054545	0.254545	0.5	0.654545	0.972727	0.336364
0.353535	0.40404	0.242424	0.234694	0.193878	0.204082	0.050505	0.20202	0.383838	0.717172	0.959596	0.020202	0.242424	0.565657	0.686869	1	0.010101	0.353535	0.505051	0.818182	0.989899	0.474747	0.323232	0.20202	0.142857	0.040816	0	0.010101	0.292929	0.686869	0.878788	1	0.030303	0.242424	0.515152	0.646465	0.818182	0.111111	0.151515	0.333333	0.383838	0.434343	0.393939	0.387755	0.030303	0.222222	0.454545	0.767677	0.979798	0.383838
0.323232	0.40404	0.272727	0.258883	0.172589	0.228426	0.035354	0.328283	0.555556	0.772727	1	0.010101	0.151515	0.414141	0.651515	0.994949	0.005051	0.242424	0.575758	0.762626	0.979798	0.585859	0.20202	0.212121	0.071066	0.050761	0	0.005051	0.222222	0.434343	0.606061	1	0.080808	0.191919	0.671717	0.823232	0.89899	0.343434	0.388889	0.646465	0.757576	0.954545	0.373737	0.467005	0.025253	0.242424	0.565657	0.757576	0.979798	0.409091
0.389831	0.305085	0.305085	0.222222	0.273504	0.145299	0.025424	0.262712	0.508475	0.720339	0.991525	0.059322	0.372881	0.584746	0.822034	1	0.008475	0.161017	0.347458	0.669492	0.898305	0.423729	0.245763	0.330508	0.08547	0.051282	0	0.008475	0.254237	0.576271	0.737288	1	0.033898	0.220339	0.440678	0.542373	0.694915	0.101695	0.169492	0.364407	0.830508	0.915254	0.389831	0.410256	0.033898	0.211864	0.449153	0.728814	0.923729	0.254237
0.414894	0.212766	0.37234	0.193548	0.354839	0.150538	0.031915	0.159574	0.478723	0.723404	1	0.170213	0.265957	0.489362	0.755319	0.957447	0.010638	0.212766	0.468085	0.744681	0.93617	0.425532	0.574468	0	0.172043	0	0	0.010638	0.234043	0.5	0.744681	1	0.031915	0.265957	0.468085	0.659574	0.93617	0	0	0	0	0	0.425532	0.387097	0.042553	0.297872	0.542553	0.840426	0.946809	0.191489
0.378947	0.294737	0.326316	0.223404	0.287234	0.138298	0.021053	0.189474	0.473684	0.694737	0.989474	0.031579	0.294737	0.526316	0.789474	0.978947	0.010526	0.221053	0.484211	0.736842	1	0.484211	0.494737	0.021053	0.148936	0.021277	0	0.010526	0.2	0.610526	0.726316	1	0.126316	0.263158	0.484211	0.747368	0.894737	0.042105	0.042105	0.042105	0.042105	0.052632	0.4	0.276596	0.147368	0.284211	0.536842	0.8	0.905263	0.305263
0.333333	0.347222	0.319444	0.230769	0.195804	0.244755	0.048611	0.3125	0.541667	0.770833	1	0.013889	0.215278	0.5	0.673611	0.979167	0.006944	0.173611	0.479167	0.701389	0.909722	0.604167	0.277778	0.118056	0.125874	0.041958	0	0.006944	0.173611	0.513889	0.8125	1	0.236111	0.319444	0.486111	0.638889	0.909722	0.0625	0.083333	0.201389	0.75	0.784722	0.416667	0.363636	0.034722	0.194444	0.423611	0.645833	0.923611	0.354167
0.254777	0.503185	0.242038	0.24359	0.115385	0.237179	0.095541	0.522293	0.687898	0.859873	0.993631	0.012739	0.203822	0.426752	0.707006	1	0.006369	0.178344	0.407643	0.605096	0.929936	0.66879	0.165605	0.165605	0.083333	0.057692	0.00641	0.006369	0.248408	0.426752	0.694268	1	0.044586	0.165605	0.229299	0.496815	0.917197	0.363057	0.66879	0.751592	0.840764	0.88535	0.426752	0.320513	0.025478	0.216561	0.44586	0.624204	0.929936	0.528662
0.284133	0.398524	0.317343	0.203704	0.207407	0.248148	0.055351	0.383764	0.549815	0.789668	1	0.00738	0.199262	0.464945	0.734317	0.99262	0.00369	0.206642	0.453875	0.730627	0.98893	0.608856	0.321033	0.070111	0.1	0.040741	0.003704	0.00369	0.232472	0.542435	0.763838	1	0.01107	0.284133	0.494465	0.664207	0.95572	0.04059	0.051661	0.132841	0.457565	0.575646	0.538745	0.288889	0.01107	0.254613	0.542435	0.752768	0.9631	0.394834
0.290123	0.391975	0.317901	0.232198	0.167183	0.26935	0.018519	0.283951	0.496914	0.768519	1	0.006173	0.219136	0.521605	0.697531	0.996914	0.003086	0.246914	0.45679	0.771605	0.993827	0.623457	0.296296	0.080247	0.092879	0.037152	0	0.003086	0.225309	0.549383	0.740741	1	0.111111	0.299383	0.481481	0.756173	0.919753	0.018519	0.033951	0.058642	0.447531	0.966049	0.604938	0.28483	0.012346	0.194444	0.475309	0.712963	0.993827	0.429012
0.301325	0.403974	0.294702	0.212625	0.186047	0.245847	0.009934	0.31457	0.533113	0.761589	0.993377	0.013245	0.195364	0.463576	0.741722	0.996689	0.003311	0.18543	0.450331	0.718543	1	0.576159	0.274834	0.149007	0.086379	0.039867	0.006645	0.003311	0.274834	0.576159	0.781457	1	0.15894	0.364238	0.556291	0.854305	0.970199	0.013245	0.046358	0.082781	0.221854	0.629139	0.596026	0.285714	0.023179	0.195364	0.450331	0.758278	0.976821	0.400662
0.311628	0.362791	0.325581	0.214953	0.219626	0.242991	0.009302	0.255814	0.455814	0.725581	1	0.037209	0.297674	0.567442	0.706977	0.986047	0.004651	0.172093	0.465116	0.809302	0.995349	0.572093	0.395349	0.032558	0.11215	0.009346	0	0.004651	0.302326	0.604651	0.748837	1	0.023256	0.153488	0.409302	0.795349	0.95814	0.316279	0.316279	0.325581	0.334884	0.344186	0.55814	0.336449	0.018605	0.24186	0.534884	0.75814	0.967442	0.348837
0.28022	0.406593	0.313187	0.21547	0.198895	0.270718	0.06044	0.247253	0.5	0.791209	1	0.010989	0.258242	0.538462	0.703297	0.967033	0.005495	0.164835	0.428571	0.774725	0.994505	0.554945	0.417582	0.027473	0.127072	0.005525	0.005525	0.005495	0.357143	0.604396	0.741758	1	0.027473	0.17033	0.340659	0.824176	0.994505	0.428571	0.428571	0.434066	0.43956	0.450549	0.576923	0.364641	0.016484	0.21978	0.527473	0.747253	0.994505	0.368132
0.319635	0.328767	0.351598	0.229358	0.206422	0.229358	0.009132	0.242009	0.493151	0.762557	1	0.027397	0.255708	0.406393	0.634703	0.981735	0.004566	0.214612	0.575342	0.789954	0.986301	0.515982	0.173516	0.310502	0.073394	0.055046	0	0.004566	0.292237	0.420091	0.703196	1	0.009132	0.050228	0.13242	0.744292	0.931507	0.16895	0.242009	0.579909	0.808219	0.986301	0.506849	0.394495	0.013699	0.242009	0.52968	0.785388	0.986301	0.310502
0.348123	0.385666	0.266212	0.229452	0.171233	0.202055	0.075085	0.365188	0.617747	0.832765	1	0.006826	0.16041	0.392491	0.610922	0.996587	0.003413	0.197952	0.542662	0.723549	0.969283	0.59727	0.122867	0.279863	0.068493	0.068493	0	0.003413	0.208191	0.440273	0.720137	1	0.03413	0.194539	0.474403	0.706485	0.843003	0.153584	0.307167	0.576792	0.808874	0.938567	0.467577	0.328767	0.030717	0.293515	0.505119	0.716724	0.969283	0.40273
0.365546	0.323529	0.310924	0.227848	0.223629	0.244726	0.008403	0.210084	0.462185	0.773109	1	0.021008	0.260504	0.487395	0.747899	0.991597	0.004202	0.252101	0.508403	0.722689	0.987395	0.420168	0.168067	0.411765	0.075949	0.059072	0	0.004202	0.344538	0.554622	0.710084	1	0.205882	0.352941	0.453782	0.647059	0.739496	0.029412	0.12605	0.466387	0.815126	0.983193	0.470588	0.455696	0.029412	0.285714	0.512605	0.714286	0.966387	0.323529
0.371859	0.321608	0.306533	0.181818	0.257576	0.171717	0.095477	0.296482	0.532663	0.743719	1	0.01005	0.130653	0.417085	0.733668	0.994975	0.005025	0.271357	0.477387	0.753769	0.984925	0.422111	0.266332	0.311558	0.10101	0.060606	0.010101	0.005025	0.145729	0.326633	0.693467	1	0.201005	0.351759	0.673367	0.909548	0.994975	0.015075	0.39196	0.532663	0.60804	0.874372	0.417085	0.454545	0.025126	0.201005	0.437186	0.733668	0.984925	0.311558
0.406452	0.258065	0.335484	0.181818	0.279221	0.181818	0.019355	0.245161	0.483871	0.741935	1	0.012903	0.264516	0.470968	0.677419	0.993548	0.006452	0.225806	0.496774	0.787097	0.974194	0.335484	0.270968	0.393548	0.097403	0.071429	0.019481	0.006452	0.187097	0.587097	0.767742	1	0.058065	0.277419	0.632258	0.890323	0.980645	0.019355	0.212903	0.387097	0.483871	0.825806	0.380645	0.467532	0.03871	0.219355	0.535484	0.748387	0.967742	0.264516
0.309091	0.4	0.290909	0.22561	0.213415	0.231707	0.024242	0.224242	0.442424	0.739394	0.987879	0.012121	0.272727	0.539394	0.775758	1	0.006061	0.212121	0.436364	0.709091	0.957576	0.266667	0.157576	0.575758	0.054878	0.103659	0.006098	0.006061	0.2	0.466667	0.70303	1	0.151515	0.309091	0.490909	0.648485	0.709091	0.030303	0.242424	0.551515	0.824242	0.987879	0.49697	0.47561	0.048485	0.30303	0.50303	0.715152	0.957576	0.418182
0.378531	0.378531	0.242938	0.244318	0.210227	0.181818	0.016949	0.231638	0.480226	0.757062	0.977401	0.011299	0.180791	0.474576	0.711864	1	0.00565	0.293785	0.508475	0.774011	0.99435	0.485876	0.265537	0.248588	0.090909	0.068182	0	0.00565	0.163842	0.474576	0.672316	1	0.175141	0.299435	0.559322	0.785311	0.99435	0.039548	0.333333	0.40678	0.830508	0.892655	0.536723	0.386364	0.028249	0.305085	0.514124	0.706215	0.983051	0.378531
0.343558	0.404908	0.251534	0.253086	0.179012	0.234568	0.018405	0.282209	0.558282	0.754601	0.97546	0.01227	0.171779	0.447853	0.736196	1	0.006135	0.208589	0.417178	0.687117	0.981595	0.368098	0.190184	0.441718	0.061728	0.098765	0	0.006135	0.147239	0.411043	0.668712	1	0.018405	0.055215	0.343558	0.558282	0.828221	0.134969	0.441718	0.662577	0.797546	0.98773	0.411043	0.481481	0.02454	0.233129	0.441718	0.699387	0.957055	0.503067
0.385787	0.360406	0.253807	0.265306	0.209184	0.153061	0.015228	0.238579	0.558376	0.832487	1	0.010152	0.248731	0.467005	0.71066	0.979695	0.005076	0.182741	0.390863	0.675127	0.949239	0.385787	0.208122	0.406091	0.061224	0.061224	0	0.005076	0.147208	0.436548	0.715736	1	0.030457	0.076142	0.324873	0.685279	0.959391	0.167513	0.390863	0.609137	0.791878	0.893401	0.416244	0.459184	0.035533	0.22335	0.411168	0.654822	0.949239	0.390863
0.39521	0.275449	0.329341	0.210843	0.301205	0.210843	0.017964	0.245509	0.54491	0.826347	1	0.011976	0.203593	0.491018	0.706587	0.922156	0.005988	0.215569	0.461078	0.712575	0.988024	0.365269	0.191617	0.443114	0.060241	0.084337	0	0.005988	0.131737	0.371257	0.664671	1	0.023952	0.305389	0.353293	0.556886	0.820359	0.137725	0.437126	0.658683	0.850299	0.988024	0.407186	0.481928	0.02994	0.239521	0.461078	0.736527	0.988024	0.311377
0.384615	0.312821	0.302564	0.216495	0.21134	0.226804	0.015385	0.174359	0.461538	0.692308	1	0.010256	0.266667	0.482051	0.723077	0.989744	0.005128	0.246154	0.523077	0.758974	0.979487	0.425641	0.220513	0.353846	0.06701	0.06701	0.005155	0.005128	0.220513	0.558974	0.779487	1	0.158974	0.430769	0.651282	0.738462	0.979487	0.035897	0.235897	0.34359	0.523077	0.948718	0.492308	0.443299	0.046154	0.266667	0.502564	0.717949	0.979487	0.338462
0.287671	0.369863	0.342466	0.206897	0.234483	0.255172	0.047945	0.294521	0.575342	0.780822	0.993151	0.013699	0.212329	0.479452	0.657534	1	0.006849	0.184932	0.493151	0.767123	0.986301	0.390411	0.219178	0.390411	0.068966	0.096552	0	0.006849	0.164384	0.458904	0.657534	1	0.020548	0.068493	0.431507	0.506849	0.986301	0.171233	0.308219	0.575342	0.835616	0.945205	0.479452	0.496552	0.027397	0.232877	0.479452	0.726027	0.979452	0.410959
0.36747	0.337349	0.295181	0.2	0.254545	0.248485	0.024096	0.319277	0.560241	0.753012	1	0.012048	0.174699	0.421687	0.716867	0.987952	0.006024	0.222892	0.487952	0.73494	0.981928	0.427711	0.180723	0.391566	0.084848	0.084848	0	0.006024	0.150602	0.403614	0.620482	1	0.060241	0.096386	0.391566	0.445783	0.975904	0.180723	0.319277	0.674699	0.789157	0.945783	0.415663	0.472727	0.03012	0.253012	0.475904	0.740964	0.981928	0.39759
0.310345	0.431034	0.258621	0.306358	0.17341	0.179191	0.028736	0.229885	0.54023	0.735632	1	0.011494	0.183908	0.511494	0.747126	0.977011	0.005747	0.247126	0.454023	0.724138	0.994253	0.591954	0.172414	0.235632	0.069364	0.080925	0	0.005747	0.16092	0.436782	0.701149	1	0.218391	0.252874	0.5	0.574713	0.95977	0.137931	0.321839	0.678161	0.752874	0.91954	0.436782	0.393064	0.017241	0.298851	0.477011	0.706897	0.965517	0.413793
0.386207	0.324138	0.289655	0.298611	0.1875	0.229167	0.034483	0.289655	0.462069	0.703448	0.986207	0.013793	0.241379	0.517241	0.751724	0.993103	0.006897	0.151724	0.434483	0.724138	1	0.462069	0.144828	0.393103	0.097222	0.083333	0.013889	0.006897	0.234483	0.510345	0.772414	1	0.068966	0.117241	0.268966	0.703448	0.903448	0.131034	0.289655	0.427586	0.655172	0.958621	0.42069	0.333333	0.062069	0.17931	0.372414	0.696552	0.972414	0.372414
0.313433	0.380597	0.30597	0.233083	0.18797	0.157895	0.037313	0.238806	0.567164	0.761194	0.985075	0.029851	0.261194	0.440299	0.649254	0.977612	0.007463	0.179104	0.514925	0.738806	1	0.574627	0.350746	0.074627	0.225564	0.030075	0	0.007463	0.261194	0.477612	0.746269	1	0.014925	0.149254	0.410448	0.604478	0.992537	0.873134	0.880597	0.925373	0.940299	0.962687	0.5	0.345865	0.044776	0.253731	0.552239	0.738806	0.970149	0.425373
0.270833	0.388889	0.340278	0.230769	0.132867	0.258741	0.020833	0.256944	0.534722	0.666667	0.958333	0.013889	0.215278	0.416667	0.791667	0.979167	0.006944	0.263889	0.465278	0.743056	1	0.583333	0.368056	0.048611	0.195804	0.027972	0	0.006944	0.166667	0.4375	0.777778	1	0.111111	0.277778	0.472222	0.638889	0.993056	0.881944	0.881944	0.895833	0.9375	0.951389	0.527778	0.321678	0.111111	0.284722	0.555556	0.75	0.972222	0.375
0.44898	0.352041	0.19898	0.333333	0.164103	0.138462	0.015306	0.234694	0.479592	0.734694	1	0.010204	0.265306	0.520408	0.80102	0.994898	0.005102	0.209184	0.515306	0.688776	0.959184	0.52551	0.158163	0.316327	0.041026	0.092308	0	0.005102	0.295918	0.489796	0.836735	1	0.193878	0.326531	0.591837	0.647959	0.688776	0.030612	0.122449	0.428571	0.760204	0.872449	0.428571	0.358974	0.02551	0.239796	0.520408	0.683673	0.954082	0.382653
0.368056	0.361111	0.270833	0.265734	0.20979	0.174825	0.020833	0.256944	0.534722	0.736111	0.965278	0.041667	0.201389	0.368056	0.597222	1	0.006944	0.388889	0.611111	0.833333	0.993056	0.631944	0.1875	0.180556	0.062937	0.062937	0.006993	0.006944	0.166667	0.326389	0.513889	1	0.131944	0.548611	0.805556	0.875	0.923611	0.027778	0.5625	0.666667	0.9375	0.986111	0.409722	0.405594	0.027778	0.284722	0.4375	0.729167	0.979167	0.375
0.448485	0.369697	0.181818	0.317073	0.189024	0.121951	0.024242	0.242424	0.509091	0.775758	1	0.012121	0.163636	0.381818	0.727273	0.981818	0.006061	0.406061	0.557576	0.69697	0.884848	0.575758	0.151515	0.272727	0.054878	0.054878	0.030488	0.006061	0.139394	0.30303	0.624242	1	0.242424	0.4	0.606061	0.666667	0.860606	0.406061	0.466667	0.775758	0.866667	0.939394	0.436364	0.390244	0.078788	0.278788	0.466667	0.69697	0.933333	0.430303
0.4	0.372222	0.227778	0.27933	0.206704	0.167598	0.011111	0.211111	0.455556	0.705556	1	0.05	0.261111	0.444444	0.755556	0.988889	0.005556	0.377778	0.577778	0.738889	0.961111	0.561111	0.166667	0.272222	0.061453	0.061453	0.01676	0.005556	0.216667	0.361111	0.522222	1	0.094444	0.533333	0.744444	0.8	0.933333	0.016667	0.444444	0.65	0.866667	0.988889	0.361111	0.379888	0.033333	0.338889	0.466667	0.727778	0.933333	0.377778
0.377622	0.34965	0.272727	0.323944	0.225352	0.140845	0.020979	0.216783	0.482517	0.692308	0.993007	0.034965	0.195804	0.391608	0.727273	0.965035	0.006993	0.34965	0.573427	0.762238	1	0.594406	0.181818	0.223776	0.077465	0.077465	0.021127	0.006993	0.167832	0.356643	0.573427	1	0.111888	0.328671	0.685315	0.825175	0.993007	0.027972	0.559441	0.622378	0.895105	0.951049	0.482517	0.323944	0.090909	0.314685	0.496503	0.734266	0.979021	0.321678
0.36	0.36	0.28	0.295302	0.214765	0.221477	0.013333	0.246667	0.5	0.713333	0.98	0.026667	0.193333	0.38	0.74	1	0.006667	0.34	0.566667	0.76	0.993333	0.62	0.193333	0.186667	0.067114	0.040268	0.013423	0.006667	0.16	0.313333	0.486667	1	0.126667	0.533333	0.766667	0.833333	0.993333	0.386667	0.566667	0.66	0.893333	0.94	0.4	0.402685	0.02	0.333333	0.513333	0.76	0.993333	0.32
0.337143	0.445714	0.217143	0.333333	0.172414	0.189655	0.028571	0.211429	0.451429	0.697143	0.994286	0.011429	0.234286	0.52	0.782857	1	0.005714	0.291429	0.497143	0.68	0.954286	0.611429	0.154286	0.234286	0.063218	0.051724	0.017241	0.005714	0.165714	0.32	0.605714	1	0.017143	0.445714	0.657143	0.714286	0.845714	0.022857	0.48	0.737143	0.794286	0.937143	0.382857	0.402299	0.022857	0.285714	0.445714	0.657143	0.965714	0.417143
0.352941	0.333333	0.313725	0.230263	0.256579	0.243421	0.013072	0.254902	0.496732	0.751634	0.986928	0.03268	0.169935	0.339869	0.627451	0.993464	0.006536	0.359477	0.588235	0.79085	1	0.640523	0.176471	0.183007	0.052632	0.052632	0.013158	0.006536	0.169935	0.333333	0.575163	1	0.117647	0.503268	0.764706	0.810458	0.96732	0.019608	0.529412	0.633987	0.856209	0.901961	0.392157	0.394737	0.019608	0.267974	0.431373	0.718954	0.954248	0.339869
0.405229	0.326797	0.267974	0.263158	0.223684	0.171053	0.013072	0.215686	0.503268	0.712418	0.986928	0.045752	0.20915	0.418301	0.784314	0.980392	0.006536	0.320261	0.529412	0.771242	1	0.653595	0.137255	0.20915	0.065789	0.052632	0.013158	0.006536	0.176471	0.339869	0.614379	1	0.117647	0.496732	0.777778	0.843137	0.993464	0.019608	0.529412	0.653595	0.908497	0.960784	0.392157	0.407895	0.019608	0.267974	0.424837	0.69281	0.980392	0.359477
0.356164	0.356164	0.287671	0.236111	0.277778	0.125	0.013699	0.136986	0.410959	0.630137	0.972603	0.205479	0.369863	0.671233	0.808219	0.958904	0.041096	0.164384	0.383562	0.60274	1	0.39726	0.30137	0.30137	0.152778	0.069444	0.013889	0.013699	0.219178	0.438356	0.589041	1	0.041096	0.39726	0.671233	0.739726	0.986301	0.082192	0.136986	0.328767	0.821918	0.90411	0.369863	0.472222	0.054795	0.246575	0.493151	0.684932	0.958904	0.342466
0.299363	0.464968	0.235669	0.288462	0.185897	0.217949	0.012739	0.133758	0.382166	0.636943	0.961783	0.050955	0.273885	0.528662	0.808917	1	0.006369	0.363057	0.55414	0.719745	0.942675	0.630573	0.165605	0.203822	0.051282	0.064103	0.012821	0.006369	0.165605	0.324841	0.579618	1	0.11465	0.503185	0.757962	0.796178	0.942675	0.019108	0.535032	0.636943	0.859873	0.980892	0.394904	0.397436	0.019108	0.261146	0.484076	0.713376	0.942675	0.471338
0.344828	0.393103	0.262069	0.3125	0.194444	0.173611	0.02069	0.186207	0.537931	0.717241	1	0.041379	0.213793	0.413793	0.737931	0.993103	0.006897	0.296552	0.524138	0.731034	0.965517	0.606897	0.158621	0.234483	0.076389	0.034722	0.020833	0.006897	0.158621	0.365517	0.62069	1	0.027586	0.289655	0.468966	0.8	0.951724	0.482759	0.531034	0.689655	0.855172	0.917241	0.482759	0.347222	0.062069	0.248276	0.468966	0.696552	0.944828	0.37931
0.328571	0.378571	0.292857	0.302158	0.194245	0.230216	0.021429	0.171429	0.478571	0.792857	1	0.028571	0.214286	0.435714	0.678571	0.992857	0.007143	0.3	0.514286	0.735714	0.978571	0.514286	0.235714	0.25	0.100719	0.043165	0	0.007143	0.15	0.5	0.642857	1	0.057143	0.457143	0.664286	0.742857	0.957143	0.221429	0.321429	0.385714	0.814286	0.878571	0.478571	0.374101	0.064286	0.314286	0.485714	0.728571	0.942857	0.342857
0.328467	0.364964	0.306569	0.338235	0.227941	0.191176	0.036496	0.226277	0.437956	0.70073	1	0.029197	0.218978	0.452555	0.722628	0.992701	0.007299	0.270073	0.540146	0.759124	0.970803	0.518248	0.226277	0.255474	0.102941	0.044118	0	0.007299	0.131387	0.452555	0.635036	1	0.065693	0.474453	0.686131	0.766423	0.985401	0.226277	0.328467	0.394161	0.839416	0.905109	0.489051	0.411765	0.065693	0.313869	0.489051	0.744526	0.970803	0.364964
0.383178	0.35514	0.261682	0.28169	0.234742	0.201878	0.014019	0.219626	0.528037	0.775701	0.995327	0.009346	0.285047	0.5	0.724299	1	0.004673	0.228972	0.481308	0.682243	0.990654	0.415888	0.116822	0.46729	0.056338	0.103286	0	0.004673	0.191589	0.476636	0.682243	1	0.158879	0.182243	0.228972	0.285047	0.607477	0.056075	0.392523	0.635514	0.803738	0.985981	0.565421	0.347418	0.018692	0.247664	0.429907	0.602804	0.915888	0.32243
0.398305	0.29661	0.305085	0.205128	0.273504	0.25641	0.016949	0.161017	0.432203	0.711864	0.991525	0.025424	0.322034	0.542373	0.822034	0.974576	0.008475	0.228814	0.449153	0.745763	1	0.313559	0.228814	0.457627	0.08547	0.068376	0	0.008475	0.262712	0.508475	0.754237	1	0.271186	0.313559	0.398305	0.491525	0.847458	0.025424	0.127119	0.59322	0.70339	0.957627	0.457627	0.324786	0.042373	0.29661	0.483051	0.779661	0.983051	0.305085
0.341463	0.382114	0.276423	0.278689	0.196721	0.245902	0.01626	0.195122	0.504065	0.699187	0.99187	0.02439	0.211382	0.479675	0.731707	0.97561	0.00813	0.276423	0.487805	0.756098	1	0.349593	0.219512	0.430894	0.081967	0.065574	0	0.00813	0.211382	0.414634	0.756098	1	0.252033	0.292683	0.373984	0.463415	0.853659	0.065041	0.162602	0.609756	0.715447	0.95935	0.447154	0.278689	0.121951	0.300813	0.471545	0.788618	0.98374	0.382114
0.341463	0.429268	0.229268	0.303922	0.151961	0.215686	0.029268	0.2	0.560976	0.795122	1	0.009756	0.282927	0.439024	0.717073	0.985366	0.004878	0.214634	0.497561	0.668293	0.980488	0.521951	0.121951	0.356098	0.058824	0.088235	0	0.004878	0.253659	0.55122	0.814634	1	0.165854	0.190244	0.239024	0.297561	0.629268	0.058537	0.336585	0.463415	0.702439	0.878049	0.556098	0.382353	0.019512	0.24878	0.439024	0.614634	0.965854	0.443902
0.404959	0.322314	0.272727	0.225	0.241667	0.191667	0.016529	0.190083	0.413223	0.710744	0.991736	0.033058	0.305785	0.53719	0.768595	0.975207	0.008264	0.280992	0.471074	0.735537	1	0.330579	0.231405	0.438017	0.083333	0.083333	0	0.008264	0.239669	0.487603	0.809917	1	0.256198	0.330579	0.38843	0.752066	0.85124	0.041322	0.140496	0.586777	0.694215	0.958678	0.446281	0.3	0.099174	0.330579	0.487603	0.793388	0.983471	0.272727
0.423729	0.262712	0.313559	0.196581	0.316239	0.196581	0.016949	0.211864	0.516949	0.720339	0.991525	0.042373	0.245763	0.457627	0.754237	0.974576	0.008475	0.237288	0.449153	0.745763	1	0.338983	0.220339	0.440678	0.08547	0.068376	0	0.008475	0.220339	0.533898	0.805085	1	0.228814	0.271186	0.355932	0.440678	0.847458	0.033898	0.135593	0.601695	0.711864	0.957627	0.423729	0.25641	0.127119	0.322034	0.474576	0.788136	0.983051	0.29661
0.374233	0.312883	0.312883	0.234568	0.234568	0.203704	0.042945	0.226994	0.546012	0.797546	0.993865	0.018405	0.269939	0.503067	0.717791	1	0.006135	0.196319	0.453988	0.705521	0.97546	0.392638	0.165644	0.441718	0.080247	0.104938	0.018519	0.006135	0.282209	0.564417	0.754601	1	0.018405	0.196319	0.263804	0.343558	0.760736	0.02454	0.380368	0.539877	0.840491	0.98773	0.607362	0.333333	0.01227	0.257669	0.478528	0.687117	0.97546	0.343558
0.38843	0.31405	0.297521	0.258333	0.241667	0.191667	0.016529	0.181818	0.528926	0.735537	0.991736	0.057851	0.31405	0.504132	0.826446	0.975207	0.008264	0.231405	0.413223	0.677686	1	0.380165	0.214876	0.404959	0.083333	0.066667	0	0.008264	0.231405	0.446281	0.752066	1	0.280992	0.322314	0.404959	0.487603	0.85124	0.082645	0.173554	0.619835	0.719008	0.958678	0.429752	0.283333	0.049587	0.355372	0.504132	0.793388	0.983471	0.31405
0.463087	0.362416	0.174497	0.364865	0.162162	0.128378	0.020134	0.268456	0.503356	0.718121	0.993289	0.013423	0.308725	0.516779	0.765101	1	0.006711	0.114094	0.295302	0.731544	0.95302	0.348993	0.040268	0.610738	0.02027	0.141892	0.006757	0.006711	0.248322	0.489933	0.765101	1	0.147651	0.147651	0.161074	0.33557	0.348993	0.033557	0.255034	0.57047	0.738255	0.973154	0.33557	0.432432	0.026846	0.194631	0.583893	0.731544	0.95302	0.416107
0.403756	0.300469	0.295775	0.231132	0.245283	0.212264	0.014085	0.183099	0.42723	0.713615	1	0.037559	0.342723	0.57277	0.755869	0.981221	0.004695	0.211268	0.469484	0.737089	0.99061	0.342723	0.234742	0.422535	0.084906	0.09434	0.009434	0.004695	0.187793	0.366197	0.704225	1	0.098592	0.206573	0.591549	0.741784	0.962441	0.00939	0.328638	0.511737	0.788732	0.99061	0.455399	0.490566	0.00939	0.28169	0.521127	0.751174	0.99061	0.361502
0.36036	0.301802	0.337838	0.21267	0.271493	0.20362	0.027027	0.220721	0.481982	0.77027	1	0.009009	0.256757	0.423423	0.653153	0.986486	0.004505	0.22973	0.531532	0.747748	0.995495	0.346847	0.247748	0.405405	0.085973	0.085973	0.004525	0.004505	0.189189	0.391892	0.720721	1	0.130631	0.238739	0.5	0.752252	0.963964	0.018018	0.328829	0.518018	0.675676	0.990991	0.441441	0.479638	0.022523	0.297297	0.536036	0.756757	0.986486	0.310811
0.277533	0.427313	0.295154	0.256637	0.185841	0.261062	0.013216	0.22467	0.524229	0.748899	0.982379	0.008811	0.242291	0.462555	0.700441	1	0.004405	0.259912	0.497797	0.762115	0.995595	0.462555	0.215859	0.321586	0.097345	0.070796	0	0.004405	0.171806	0.409692	0.731278	1	0.092511	0.273128	0.506608	0.76652	0.986784	0.013216	0.370044	0.537445	0.678414	0.867841	0.444934	0.460177	0.022026	0.290749	0.515419	0.753304	0.986784	0.449339
0.396694	0.280992	0.322314	0.195021	0.282158	0.186722	0.012397	0.22314	0.446281	0.735537	1	0.008264	0.305785	0.508264	0.719008	0.979339	0.004132	0.206612	0.516529	0.77686	0.991736	0.458678	0.202479	0.338843	0.091286	0.091286	0	0.004132	0.165289	0.442149	0.702479	1	0.086777	0.256198	0.479339	0.72314	0.929752	0.012397	0.355372	0.533058	0.772727	0.983471	0.429752	0.431535	0.020661	0.305785	0.520661	0.739669	0.991736	0.280992
0.335938	0.390625	0.273438	0.267717	0.15748	0.244094	0.023438	0.210938	0.398438	0.71875	0.992188	0.015625	0.21875	0.539062	0.773438	1	0.007812	0.28125	0.554688	0.734375	0.960938	0.242188	0.046875	0.710938	0.015748	0.07874	0	0.007812	0.054688	0.5625	0.703125	1	0.945312	0.945312	0.960938	0.96875	0.984375	0.0625	0.28125	0.460938	0.71875	0.914062	0.445312	0.456693	0.03125	0.328125	0.523438	0.742188	0.96875	0.375
0.417323	0.314961	0.267717	0.238095	0.246032	0.111111	0.015748	0.251969	0.433071	0.716535	1	0.03937	0.220472	0.362205	0.771654	0.992126	0.007874	0.299213	0.574803	0.732283	0.984252	0.259843	0	0.740157	0	0.079365	0	0.007874	0.181102	0.669291	0.929134	1	0	0	0	0	0	0.047244	0.267717	0.456693	0.716535	0.92126	0.433071	0.492063	0.023622	0.307087	0.511811	0.716535	0.984252	0.283465
0.375	0.367647	0.257353	0.281481	0.177778	0.2	0.022059	0.205882	0.389706	0.654412	0.992647	0.036765	0.235294	0.558824	0.816176	1	0.007353	0.286765	0.477941	0.698529	0.948529	0.316176	0.007353	0.676471	0.014815	0.074074	0	0.007353	0.176471	0.647059	0.911765	1	0.977941	0.977941	0.977941	0.977941	0.977941	0.058824	0.272059	0.441176	0.683824	0.867647	0.411765	0.459259	0.029412	0.308824	0.492647	0.691176	0.926471	0.352941
0.417112	0.352941	0.229947	0.311828	0.182796	0.123656	0.032086	0.304813	0.550802	0.786096	0.994652	0.010695	0.251337	0.55615	0.759358	1	0.005348	0.176471	0.326203	0.545455	0.893048	0.347594	0.342246	0.31016	0.129032	0.021505	0	0.005348	0.240642	0.427807	0.572193	1	0.010695	0.117647	0.256684	0.406417	0.625668	0.657754	0.727273	0.823529	0.898396	0.97861	0.31016	0.430108	0.010695	0.203209	0.385027	0.604278	0.909091	0.358289
0.401575	0.23622	0.362205	0.198413	0.373016	0.142857	0.047244	0.267717	0.551181	0.748031	0.968504	0.015748	0.125984	0.519685	0.811024	1	0.007874	0.212598	0.425197	0.677165	0.976378	0.464567	0.496063	0.03937	0.15873	0.031746	0	0.007874	0.346457	0.614173	0.818898	1	0.015748	0.165354	0.362205	0.590551	0.905512	0.850394	0.850394	0.858268	0.866142	0.968504	0.354331	0.460317	0.015748	0.19685	0.409449	0.606299	0.976378	0.23622
0.427184	0.271845	0.300971	0.205882	0.245098	0.127451	0.058252	0.281553	0.495146	0.737864	0.970874	0.019417	0.252427	0.553398	0.796117	0.92233	0.009709	0.194175	0.38835	0.699029	1	0.407767	0.592233	0	0.196078	0	0	0.009709	0.281553	0.543689	0.786408	1	0.019417	0.203883	0.407767	0.699029	0.990291	0	0	0	0	0	0.38835	0.509804	0.019417	0.213592	0.475728	0.708738	0.980583	0.242718
0.40625	0.291667	0.302083	0.242105	0.157895	0.221053	0.020833	0.25	0.541667	0.770833	0.958333	0.03125	0.28125	0.447917	0.635417	0.989583	0.010417	0.208333	0.427083	0.697917	1	0.46875	0.53125	0	0.168421	0	0	0.010417	0.3125	0.53125	0.802083	1	0.020833	0.197917	0.385417	0.6875	0.979167	0	0	0	0	0	0.302083	0.4	0.03125	0.208333	0.416667	0.697917	0.96875	0.291667
0.310606	0.431818	0.257576	0.274809	0.183206	0.19084	0.037879	0.257576	0.568182	0.727273	0.984848	0.015152	0.280303	0.522727	0.772727	1	0.007576	0.189394	0.340909	0.583333	0.962121	0.507576	0.492424	0	0.152672	0	0	0.007576	0.363636	0.636364	0.856061	1	0.037879	0.189394	0.356061	0.598485	0.969697	0	0	0	0	0	0.340909	0.381679	0.045455	0.204545	0.416667	0.606061	0.962121	0.431818
0.40625	0.395833	0.197917	0.315789	0.2	0.126316	0.052083	0.21875	0.447917	0.729167	1	0.020833	0.197917	0.489583	0.6875	0.947917	0.010417	0.322917	0.5	0.791667	0.958333	0.583333	0.3125	0.104167	0.094737	0.052632	0.010526	0.010417	0.145833	0.333333	0.520833	1	0.40625	0.65625	0.760417	0.854167	0.979167	0.28125	0.291667	0.572917	0.59375	0.947917	0.427083	0.4	0.114583	0.354167	0.541667	0.75	0.958333	0.4375
0.356589	0.406977	0.236434	0.245136	0.171206	0.167315	0.023256	0.271318	0.562016	0.75969	1	0.011628	0.286822	0.503876	0.689922	0.988372	0.003876	0.158915	0.379845	0.77907	0.98062	0.453488	0.248062	0.29845	0.081712	0.089494	0.003891	0.003876	0.306202	0.577519	0.724806	1	0.007752	0.085271	0.182171	0.290698	0.837209	0.426357	0.503876	0.709302	0.875969	0.988372	0.360465	0.44358	0.007752	0.224806	0.48062	0.825581	0.984496	0.434109
0.403846	0.317308	0.278846	0.262136	0.184466	0.223301	0.086538	0.230769	0.509615	0.759615	0.932692	0.019231	0.240385	0.461538	0.711538	0.990385	0.009615	0.201923	0.471154	0.692308	1	0.413462	0.586538	0	0.174757	0	0	0.009615	0.278846	0.528846	0.778846	1	0.019231	0.201923	0.403846	0.701923	0.990385	0	0	0	0	0	0.384615	0.504854	0.019231	0.211538	0.471154	0.701923	0.971154	0.278846
0.342105	0.394737	0.263158	0.300885	0.230088	0.150442	0.052632	0.201754	0.491228	0.754386	0.973684	0.017544	0.27193	0.535088	0.780702	1	0.008772	0.192982	0.368421	0.561404	0.885965	0.473684	0.526316	0	0.159292	0	0	0.008772	0.377193	0.605263	0.789474	1	0.017544	0.184211	0.368421	0.640351	0.894737	0	0	0	0	0	0.350877	0.460177	0.017544	0.192982	0.429825	0.649123	0.903509	0.359649
0.361905	0.257143	0.380952	0.153846	0.269231	0.144231	0.057143	0.180952	0.533333	0.780952	0.971429	0.019048	0.285714	0.485714	0.67619	1	0.009524	0.209524	0.47619	0.704762	0.990476	0.438095	0.561905	0	0.173077	0	0	0.009524	0.27619	0.533333	0.790476	1	0.019048	0.190476	0.409524	0.704762	0.980952	0	0	0	0	0	0.390476	0.519231	0.019048	0.209524	0.457143	0.704762	0.980952	0.257143
0.330189	0.386792	0.283019	0.266667	0.219048	0.171429	0.056604	0.226415	0.584906	0.792453	1	0.018868	0.254717	0.481132	0.773585	0.990566	0.009434	0.188679	0.386792	0.556604	0.95283	0.443396	0.556604	0	0.190476	0	0	0.009434	0.283019	0.528302	0.783019	1	0.018868	0.188679	0.396226	0.688679	0.962264	0	0	0	0	0	0.358491	0.495238	0.018868	0.188679	0.462264	0.688679	0.95283	0.386792
0.340426	0.404255	0.255319	0.3	0.178571	0.157143	0.049645	0.22695	0.510638	0.659574	1	0.014184	0.319149	0.602837	0.843972	0.978723	0.007092	0.184397	0.361702	0.560284	0.964539	0.496454	0.446809	0.056738	0.157143	0.014286	0	0.007092	0.333333	0.602837	0.815603	1	0.014184	0.148936	0.340426	0.539007	0.77305	0.886525	0.893617	0.907801	0.921986	0.93617	0.35461	0.414286	0.014184	0.184397	0.397163	0.638298	0.907801	0.375887
0.320755	0.396226	0.283019	0.247619	0.219048	0.190476	0.09434	0.226415	0.575472	0.745283	1	0.018868	0.283019	0.528302	0.801887	0.981132	0.009434	0.188679	0.377358	0.59434	0.943396	0.424528	0.575472	0	0.171429	0	0	0.009434	0.292453	0.613208	0.792453	1	0.018868	0.198113	0.386792	0.669811	0.95283	0	0	0	0	0	0.358491	0.47619	0.018868	0.188679	0.443396	0.679245	0.943396	0.339623
0.321918	0.452055	0.226027	0.275862	0.17931	0.186207	0.020548	0.171233	0.472603	0.753425	0.993151	0.013699	0.205479	0.452055	0.691781	1	0.006849	0.383562	0.568493	0.746575	0.958904	0.363014	0.342466	0.294521	0.048276	0.048276	0.02069	0.006849	0.089041	0.191781	0.5	1	0.10274	0.69863	0.787671	0.883562	0.972603	0.226027	0.363014	0.465753	0.575342	0.691781	0.438356	0.372414	0.109589	0.349315	0.547945	0.767123	0.958904	0.452055
0.390977	0.315789	0.293233	0.265152	0.181818	0.219697	0.022556	0.24812	0.518797	0.75188	1	0.015038	0.210526	0.458647	0.721805	0.969925	0.007519	0.270677	0.473684	0.729323	0.924812	0.300752	0.360902	0.338346	0.045455	0.060606	0.015152	0.007519	0.105263	0.323308	0.609023	1	0.150376	0.654135	0.744361	0.849624	0.93985	0.06015	0.278195	0.390977	0.511278	0.631579	0.421053	0.439394	0.150376	0.308271	0.526316	0.736842	0.924812	0.323308
0.411765	0.323529	0.264706	0.237037	0.214815	0.162963	0.029412	0.242647	0.544118	0.772059	1	0.014706	0.220588	0.514706	0.779412	0.955882	0.007353	0.264706	0.404412	0.683824	0.926471	0.441176	0.191176	0.367647	0.051852	0.081481	0.022222	0.007353	0.220588	0.705882	0.830882	1	0.154412	0.191176	0.676471	0.889706	0.941176	0.029412	0.25	0.375	0.5	0.639706	0.433824	0.444444	0.051471	0.294118	0.514706	0.742647	0.926471	0.323529
0.389937	0.352201	0.257862	0.291139	0.208861	0.177215	0.018868	0.238994	0.45283	0.672956	1	0.012579	0.220126	0.54717	0.786164	0.949686	0.006289	0.251572	0.465409	0.754717	0.981132	0.36478	0.301887	0.333333	0.094937	0.06962	0.018987	0.006289	0.132075	0.440252	0.528302	1	0.031447	0.427673	0.792453	0.899371	0.987421	0.125786	0.27044	0.371069	0.63522	0.880503	0.421384	0.455696	0.044025	0.301887	0.566038	0.779874	0.981132	0.320755
0.314721	0.527919	0.15736	0.346939	0.107143	0.112245	0.030457	0.238579	0.532995	0.71066	1	0.010152	0.284264	0.563452	0.80203	0.994924	0.005076	0.15736	0.28934	0.482234	0.857868	0.375635	0.248731	0.375635	0.035714	0.066327	0.015306	0.005076	0.253807	0.746193	0.888325	1	0.06599	0.411168	0.472081	0.543147	0.86802	0.055838	0.218274	0.340102	0.695431	0.969543	0.335025	0.326531	0.06599	0.19797	0.340102	0.497462	0.923858	0.548223
0.394089	0.37931	0.226601	0.331683	0.158416	0.153465	0.009852	0.325123	0.605911	0.788177	1	0.029557	0.251232	0.487685	0.724138	0.970443	0.004926	0.142857	0.344828	0.546798	0.995074	0.334975	0.251232	0.413793	0.039604	0.059406	0.019802	0.004926	0.231527	0.748768	0.842365	1	0.044335	0.37931	0.44335	0.517241	0.975369	0.098522	0.216749	0.600985	0.704433	0.985222	0.344828	0.376238	0.044335	0.192118	0.369458	0.527094	0.965517	0.37931
0.389937	0.339623	0.27044	0.303797	0.170886	0.164557	0.037736	0.257862	0.591195	0.767296	1	0.018868	0.27044	0.477987	0.679245	0.981132	0.006289	0.144654	0.433962	0.660377	0.987421	0.257862	0.314465	0.427673	0.050633	0.050633	0.012658	0.006289	0.251572	0.572327	0.918239	1	0.018868	0.446541	0.528302	0.616352	0.930818	0.08805	0.213836	0.352201	0.773585	0.880503	0.36478	0.392405	0.018868	0.18239	0.358491	0.540881	0.937107	0.358491
0.362069	0.333333	0.304598	0.208092	0.236994	0.219653	0.011494	0.281609	0.505747	0.775862	1	0.017241	0.195402	0.494253	0.729885	0.982759	0.005747	0.212644	0.442529	0.655172	0.988506	0.494253	0.097701	0.408046	0.034682	0.080925	0	0.005747	0.304598	0.477011	0.758621	1	0.327586	0.643678	0.666667	0.804598	0.833333	0.045977	0.183908	0.408046	0.563218	0.982759	0.385057	0.404624	0.017241	0.247126	0.511494	0.712644	0.971264	0.258621
0.375	0.291667	0.333333	0.197605	0.299401	0.209581	0.017857	0.25	0.52381	0.77381	1	0.029762	0.196429	0.428571	0.702381	0.958333	0.005952	0.279762	0.535714	0.755952	0.988095	0.404762	0.261905	0.333333	0.095808	0.05988	0.011976	0.005952	0.136905	0.404762	0.660714	1	0.089286	0.47619	0.720238	0.815476	0.892857	0.154762	0.25	0.505952	0.589286	0.982143	0.410714	0.431138	0.029762	0.279762	0.517857	0.702381	0.982143	0.27381
0.415094	0.301887	0.283019	0.272152	0.21519	0.234177	0.012579	0.245283	0.54717	0.792453	1	0.037736	0.257862	0.446541	0.679245	0.987421	0.006289	0.213836	0.471698	0.691824	0.974843	0.27673	0.314465	0.408805	0.050633	0.063291	0.012658	0.006289	0.150943	0.345912	0.742138	1	0.025157	0.610063	0.691824	0.779874	0.861635	0.075472	0.283019	0.408805	0.540881	0.974843	0.402516	0.43038	0.018868	0.301887	0.496855	0.691824	0.981132	0.295597
0.327586	0.327586	0.344828	0.226087	0.26087	0.226087	0.017241	0.258621	0.491379	0.715517	0.982759	0.025862	0.163793	0.508621	0.741379	0.939655	0.008621	0.241379	0.474138	0.732759	1	0.215517	0.405172	0.37931	0.043478	0.06087	0.026087	0.008621	0.137931	0.37931	0.577586	1	0.077586	0.655172	0.758621	0.87931	0.982759	0.051724	0.224138	0.353448	0.491379	0.62931	0.474138	0.486957	0.068966	0.241379	0.474138	0.689655	0.965517	0.327586
0.359756	0.420732	0.219512	0.276074	0.202454	0.153374	0.02439	0.280488	0.52439	0.72561	0.97561	0.012195	0.176829	0.365854	0.670732	0.987805	0.006098	0.439024	0.634146	0.804878	1	0.45122	0.195122	0.353659	0.06135	0.07362	0	0.006098	0.317073	0.432927	0.682927	1	0.268293	0.518293	0.652439	0.823171	0.902439	0.018293	0.146341	0.5	0.707317	0.969512	0.292683	0.404908	0.030488	0.481707	0.621951	0.786585	0.981707	0.414634
0.431193	0.238532	0.330275	0.222222	0.296296	0.148148	0.027523	0.229358	0.486239	0.688073	0.981651	0.018349	0.238532	0.412844	0.724771	0.990826	0.009174	0.211009	0.495413	0.788991	1	0.449541	0.311927	0.238532	0.12963	0.055556	0	0.009174	0.238532	0.59633	0.834862	1	0.256881	0.495413	0.614679	0.779817	0.963303	0.055046	0.155963	0.220183	0.394495	0.458716	0.440367	0.388889	0.055046	0.211009	0.495413	0.816514	0.963303	0.256881
0.368932	0.300971	0.330097	0.205882	0.245098	0.205882	0.029126	0.252427	0.475728	0.728155	0.980583	0.048544	0.203883	0.533981	0.757282	0.902913	0.009709	0.15534	0.495146	0.679612	1	0.427184	0.330097	0.242718	0.117647	0.039216	0.019608	0.009709	0.271845	0.640777	0.815534	1	0.116505	0.320388	0.592233	0.708738	0.970874	0.07767	0.194175	0.252427	0.436893	0.504854	0.359223	0.411765	0.038835	0.15534	0.339806	0.572816	0.970874	0.291262
0.333333	0.387387	0.279279	0.318182	0.154545	0.2	0.018018	0.189189	0.468468	0.711712	0.954955	0.036036	0.243243	0.459459	0.747748	1	0.009009	0.207207	0.495495	0.702703	0.990991	0.468468	0.315315	0.216216	0.109091	0.036364	0.018182	0.009009	0.27027	0.432432	0.81982	1	0.063063	0.387387	0.666667	0.783784	0.936937	0.054054	0.171171	0.468468	0.522523	0.576577	0.342342	0.363636	0.036036	0.135135	0.45045	0.666667	0.936937	0.396396
0.375	0.291667	0.333333	0.221053	0.305263	0.178947	0.020833	0.260417	0.5	0.6875	0.979167	0.03125	0.1875	0.479167	0.791667	0.989583	0.010417	0.229167	0.489583	0.739583	1	0.4375	0.302083	0.260417	0.126316	0.063158	0	0.010417	0.239583	0.635417	0.78125	1	0.260417	0.520833	0.59375	0.822917	0.958333	0.03125	0.145833	0.208333	0.416667	0.489583	0.375	0.442105	0.041667	0.208333	0.479167	0.75	0.96875	0.302083
0.347826	0.365217	0.286957	0.307018	0.201754	0.210526	0.043478	0.217391	0.495652	0.747826	0.982609	0.017391	0.191304	0.469565	0.756522	1	0.008696	0.278261	0.504348	0.66087	0.991304	0.504348	0.234783	0.26087	0.096491	0.061404	0.008772	0.008696	0.121739	0.434783	0.773913	1	0.391304	0.6	0.66087	0.843478	0.947826	0.173913	0.226087	0.347826	0.521739	0.965217	0.330435	0.368421	0.130435	0.278261	0.530435	0.66087	0.965217	0.373913
0.365385	0.326923	0.307692	0.223301	0.281553	0.194175	0.019231	0.240385	0.480769	0.711538	0.990385	0.086538	0.25	0.567308	0.778846	1	0.009615	0.182692	0.461538	0.692308	0.961538	0.413462	0.298077	0.288462	0.106796	0.048544	0.009709	0.009615	0.288462	0.663462	0.798077	1	0.115385	0.365385	0.625	0.836538	0.961538	0.028846	0.144231	0.221154	0.461538	0.538462	0.346154	0.38835	0.028846	0.153846	0.413462	0.625	0.961538	0.336538
0.378049	0.292683	0.329268	0.259259	0.209877	0.160494	0.04878	0.256098	0.487805	0.695122	0.95122	0.060976	0.146341	0.463415	0.792683	0.97561	0.012195	0.195122	0.47561	0.768293	1	0.353659	0.304878	0.341463	0.098765	0.074074	0	0.012195	0.329268	0.560976	0.829268	1	0.036585	0.268293	0.585366	0.658537	0.804878	0.121951	0.195122	0.426829	0.512195	0.939024	0.414634	0.518519	0.036585	0.158537	0.463415	0.646341	0.963415	0.304878
0.383721	0.302326	0.313953	0.235294	0.235294	0.211765	0.023256	0.255814	0.430233	0.709302	0.953488	0.034884	0.186047	0.569767	0.72093	0.976744	0.011628	0.197674	0.453488	0.755814	1	0.383721	0.290698	0.325581	0.094118	0.070588	0	0.011628	0.139535	0.55814	0.825581	1	0.081395	0.302326	0.604651	0.674419	0.813953	0.162791	0.232558	0.453488	0.534884	0.94186	0.406977	0.494118	0.046512	0.151163	0.395349	0.651163	0.965116	0.325581
0.33	0.4	0.27	0.242424	0.141414	0.212121	0.06	0.27	0.48	0.67	0.94	0.02	0.22	0.59	0.82	1	0.01	0.15	0.33	0.54	0.96	0.47	0.26	0.27	0.10101	0.080808	0	0.01	0.16	0.63	0.79	1	0.28	0.33	0.59	0.72	0.86	0.07	0.18	0.25	0.45	0.95	0.37	0.40404	0.07	0.17	0.45	0.6	0.96	0.43
0.491018	0.293413	0.215569	0.301205	0.186747	0.144578	0.011976	0.323353	0.616766	0.820359	1	0.053892	0.185629	0.437126	0.652695	0.994012	0.005988	0.143713	0.329341	0.526946	0.928144	0.45509	0.185629	0.359281	0.072289	0.084337	0	0.005988	0.353293	0.532934	0.694611	1	0.143713	0.293413	0.341317	0.473054	0.682635	0.017964	0.215569	0.736527	0.826347	0.976048	0.281437	0.313253	0.023952	0.155689	0.323353	0.491018	0.928144	0.281437
0.446009	0.29108	0.262911	0.207547	0.264151	0.150943	0.00939	0.253521	0.478873	0.71831	0.995305	0.014085	0.328638	0.605634	0.816901	0.985915	0.004695	0.206573	0.408451	0.652582	1	0.516432	0.234742	0.248826	0.108491	0.042453	0.014151	0.004695	0.328638	0.525822	0.769953	1	0.032864	0.253521	0.384977	0.877934	0.948357	0.014085	0.103286	0.43662	0.58216	0.694836	0.262911	0.320755	0.018779	0.15493	0.356808	0.633803	0.938967	0.28169
0.367089	0.388186	0.244726	0.317797	0.211864	0.190678	0.008439	0.257384	0.531646	0.797468	1	0.016878	0.303797	0.535865	0.78903	0.974684	0.004219	0.130802	0.337553	0.582278	0.991561	0.71308	0.177215	0.109705	0.076271	0.016949	0.008475	0.004219	0.438819	0.624473	0.801688	1	0.029536	0.126582	0.270042	0.35443	0.945148	0.012658	0.063291	0.092827	0.172996	0.202532	0.168776	0.186441	0.012658	0.084388	0.202532	0.341772	0.7173	0.392405
0.396552	0.327586	0.275862	0.313043	0.269565	0.156522	0.017241	0.275862	0.534483	0.706897	1	0.034483	0.232759	0.62931	0.844828	0.974138	0.008621	0.189655	0.396552	0.525862	0.87931	0.508621	0.241379	0.25	0.104348	0.052174	0	0.008621	0.318966	0.663793	0.87069	1	0.241379	0.465517	0.525862	0.706897	0.810345	0.025862	0.077586	0.189655	0.362069	0.431034	0.336207	0.330435	0.051724	0.163793	0.422414	0.698276	0.853448	0.344828
0.39759	0.277108	0.325301	0.207317	0.207317	0.207317	0.036145	0.277108	0.46988	0.710843	0.951807	0.024096	0.13253	0.39759	0.759036	0.975904	0.012048	0.192771	0.493976	0.674699	1	0.385542	0.289157	0.325301	0.097561	0.073171	0	0.012048	0.13253	0.542169	0.819277	1	0.048193	0.301205	0.60241	0.674699	0.807229	0.144578	0.204819	0.445783	0.53012	0.951807	0.39759	0.487805	0.048193	0.180723	0.445783	0.650602	0.963855	0.301205
0.465347	0.217822	0.316832	0.18	0.29	0.1	0.029703	0.277228	0.544554	0.782178	1	0.128713	0.168317	0.316832	0.60396	0.841584	0.009901	0.237624	0.514851	0.742574	0.990099	0.425743	0.287129	0.287129	0.12	0.06	0	0.009901	0.178218	0.643564	0.792079	1	0.29703	0.544554	0.613861	0.821782	0.950495	0.049505	0.108911	0.237624	0.435644	0.514851	0.376238	0.4	0.079208	0.178218	0.465347	0.613861	0.960396	0.188119
0.411765	0.235294	0.352941	0.223881	0.283582	0.104478	0.044118	0.294118	0.588235	0.808824	0.985294	0.029412	0.25	0.411765	0.705882	0.970588	0.014706	0.191176	0.441176	0.617647	1	0.485294	0.161765	0.352941	0.149254	0.059701	0	0.014706	0.147059	0.279412	0.661765	1	0.058824	0.088235	0.308824	0.426471	0.470588	0.514706	0.588235	0.735294	0.823529	0.911765	0.323529	0.447761	0.058824	0.205882	0.426471	0.602941	0.838235	0.338235
0.408696	0.321739	0.269565	0.298246	0.219298	0.157895	0.017391	0.252174	0.521739	0.817391	1	0.052174	0.26087	0.504348	0.73913	0.956522	0.008696	0.156522	0.373913	0.652174	0.965217	0.478261	0.521739	0	0.192982	0	0	0.008696	0.191304	0.495652	0.73913	1	0.026087	0.295652	0.469565	0.782609	0.965217	0	0	0	0	0	0.408696	0.315789	0.026087	0.286957	0.469565	0.678261	0.965217	0.330435
0.445545	0.237624	0.316832	0.22	0.3	0.12	0.019802	0.287129	0.49505	0.792079	0.990099	0.029703	0.19802	0.50495	0.752475	0.970297	0.009901	0.247525	0.455446	0.712871	1	0.405941	0.594059	0	0.2	0	0	0.009901	0.207921	0.50495	0.742574	1	0.029703	0.247525	0.445545	0.722772	0.990099	0	0	0	0	0	0.445545	0.32	0.049505	0.257426	0.455446	0.683168	0.930693	0.277228
0.330275	0.302752	0.366972	0.203704	0.25	0.240741	0.036697	0.247706	0.495413	0.779817	1	0.018349	0.302752	0.513761	0.733945	0.963303	0.009174	0.229358	0.440367	0.715596	0.990826	0.422018	0.577982	0	0.203704	0	0	0.009174	0.275229	0.522936	0.752294	1	0.027523	0.229358	0.449541	0.706422	0.981651	0	0	0	0	0	0.431193	0.314815	0.045872	0.238532	0.568807	0.697248	0.990826	0.357798
0.37963	0.296296	0.324074	0.261682	0.196262	0.205607	0.027778	0.222222	0.490741	0.777778	1	0.064815	0.231481	0.481481	0.648148	0.972222	0.009259	0.259259	0.425926	0.731481	0.981481	0.416667	0.555556	0.027778	0.186916	0.018692	0	0.009259	0.305556	0.518519	0.75	1	0.055556	0.259259	0.444444	0.694444	0.972222	0.018519	0.018519	0.018519	0.027778	0.037037	0.444444	0.35514	0.055556	0.268519	0.537037	0.675926	0.981481	0.351852
0.463087	0.288591	0.248322	0.236486	0.243243	0.128378	0.013423	0.261745	0.510067	0.838926	1	0.026846	0.201342	0.52349	0.66443	0.986577	0.006711	0.241611	0.449664	0.644295	0.865772	0.422819	0.248322	0.328859	0.128378	0.087838	0.02027	0.006711	0.288591	0.496644	0.731544	1	0.026846	0.348993	0.463087	0.57047	0.838926	0.060403	0.154362	0.657718	0.805369	0.979866	0.315436	0.364865	0.114094	0.302013	0.47651	0.651007	0.946309	0.275168
0.388889	0.333333	0.277778	0.280374	0.233645	0.224299	0.027778	0.305556	0.555556	0.768519	1	0.018519	0.222222	0.453704	0.657407	0.990741	0.009259	0.138889	0.398148	0.666667	0.962963	0.435185	0.564815	0	0.186916	0	0	0.009259	0.287037	0.518519	0.75	1	0.027778	0.231481	0.407407	0.666667	0.962963	0	0	0	0	0	0.398148	0.35514	0.037037	0.222222	0.537037	0.666667	0.962963	0.37037
0.408	0.344	0.248	0.290323	0.241935	0.177419	0.016	0.216	0.44	0.728	0.984	0.048	0.296	0.552	0.76	0.992	0.008	0.136	0.368	0.616	1	0.464	0.536	0	0.193548	0	0	0.008	0.272	0.528	0.76	1	0.04	0.224	0.488	0.712	0.992	0	0	0	0	0	0.416	0.322581	0.048	0.248	0.496	0.616	0.944	0.336
0.442857	0.278571	0.278571	0.251799	0.266187	0.179856	0.021429	0.257143	0.5	0.792857	0.971429	0.05	0.2	0.507143	0.721429	0.992857	0.007143	0.242857	0.464286	0.728571	1	0.45	0.285714	0.264286	0.093525	0.079137	0.007194	0.007143	0.128571	0.457143	0.742857	1	0.021429	0.421429	0.585714	0.678571	0.792857	0.157143	0.214286	0.342857	0.857143	0.95	0.357143	0.460432	0.028571	0.307143	0.557143	0.714286	0.95	0.285714
0.431034	0.310345	0.258621	0.313043	0.234783	0.13913	0.017241	0.275862	0.508621	0.784483	1	0.043103	0.189655	0.465517	0.715517	0.991379	0.008621	0.267241	0.534483	0.663793	0.965517	0.456897	0.508621	0.034483	0.156522	0.017391	0	0.008621	0.206897	0.482759	0.715517	1	0.137931	0.293103	0.551724	0.758621	0.939655	0.060345	0.060345	0.068966	0.077586	0.086207	0.431034	0.330435	0.060345	0.267241	0.543103	0.663793	0.956897	0.318966
0.393443	0.352459	0.254098	0.280992	0.22314	0.165289	0.016393	0.245902	0.491803	0.811475	1	0.02459	0.262295	0.5	0.745902	0.991803	0.008197	0.188525	0.352459	0.639344	0.95082	0.5	0.5	0	0.198347	0	0	0.008197	0.327869	0.508197	0.803279	1	0.02459	0.204918	0.368852	0.639344	0.942623	0	0	0	0	0	0.409836	0.347107	0.032787	0.221311	0.516393	0.631148	0.95082	0.368852
0.377358	0.330189	0.292453	0.266667	0.228571	0.2	0.018868	0.188679	0.40566	0.754717	0.981132	0.066038	0.301887	0.528302	0.745283	1	0.009434	0.226415	0.471698	0.679245	0.990566	0.443396	0.556604	0	0.190476	0	0	0.009434	0.188679	0.481132	0.726415	1	0.037736	0.235849	0.537736	0.773585	0.981132	0	0	0	0	0	0.45283	0.32381	0.037736	0.254717	0.537736	0.669811	0.971698	0.358491
0.41791	0.313433	0.268657	0.263158	0.218045	0.180451	0.037313	0.261194	0.514925	0.813433	0.985075	0.022388	0.201493	0.462687	0.701493	1	0.007463	0.216418	0.477612	0.69403	0.992537	0.402985	0.268657	0.328358	0.135338	0.075188	0.015038	0.007463	0.298507	0.514925	0.686567	1	0.19403	0.373134	0.5	0.656716	0.985075	0.044776	0.141791	0.268657	0.850746	0.932836	0.335821	0.421053	0.104478	0.313433	0.5	0.69403	0.895522	0.30597
0.455172	0.282759	0.262069	0.236111	0.243056	0.194444	0.02069	0.296552	0.641379	0.834483	1	0.013793	0.241379	0.4	0.593103	0.924138	0.006897	0.172414	0.386207	0.586207	0.965517	0.475862	0.282759	0.241379	0.097222	0.083333	0	0.006897	0.241379	0.510345	0.751724	1	0.144828	0.227586	0.365517	0.434483	0.772414	0.075862	0.606897	0.668966	0.889655	0.972414	0.317241	0.375	0.034483	0.227586	0.386207	0.551724	0.965517	0.296552
0.345133	0.389381	0.265487	0.25	0.196429	0.1875	0.035398	0.221239	0.451327	0.716814	0.982301	0.017699	0.274336	0.530973	0.743363	1	0.00885	0.123894	0.389381	0.690265	0.99115	0.460177	0.530973	0.00885	0.169643	0.008929	0.008929	0.00885	0.19469	0.486726	0.725664	1	0.044248	0.283186	0.566372	0.787611	0.99115	0.035398	0.035398	0.035398	0.035398	0.035398	0.40708	0.285714	0.044248	0.265487	0.557522	0.672566	0.99115	0.415929
0.275	0.454167	0.270833	0.217573	0.179916	0.217573	0.0125	0.158333	0.4125	0.675	1	0.008333	0.2875	0.566667	0.854167	0.991667	0.004167	0.2625	0.441667	0.6125	0.816667	0.441667	0.325	0.233333	0.117155	0.066946	0.008368	0.004167	0.304167	0.6125	0.779167	1	0.0125	0.183333	0.379167	0.5375	0.754167	0.066667	0.208333	0.658333	0.866667	0.925	0.4	0.426778	0.016667	0.241667	0.425	0.625	0.966667	0.454167
0.316327	0.346939	0.336735	0.220513	0.25641	0.261538	0.010204	0.209184	0.479592	0.688776	1	0.015306	0.229592	0.52551	0.80102	0.994898	0.005102	0.285714	0.484694	0.714286	0.933673	0.413265	0.469388	0.117347	0.123077	0.041026	0	0.005102	0.30102	0.591837	0.831633	1	0.015306	0.321429	0.489796	0.673469	0.928571	0.112245	0.132653	0.265306	0.295918	0.979592	0.44898	0.492308	0.020408	0.270408	0.479592	0.719388	0.933673	0.331633
0.380734	0.330275	0.288991	0.21659	0.221198	0.24424	0.022936	0.238532	0.454128	0.784404	1	0.009174	0.229358	0.545872	0.798165	0.986239	0.004587	0.247706	0.440367	0.665138	0.995413	0.481651	0.357798	0.16055	0.124424	0.050691	0.004608	0.004587	0.307339	0.633028	0.834862	1	0.009174	0.275229	0.417431	0.591743	0.926606	0.068807	0.100917	0.238532	0.715596	0.894495	0.417431	0.460829	0.018349	0.233945	0.426606	0.655963	0.96789	0.376147
0.301887	0.40566	0.292453	0.251185	0.227488	0.21327	0.009434	0.221698	0.438679	0.669811	1	0.014151	0.240566	0.570755	0.84434	0.990566	0.004717	0.287736	0.495283	0.660377	0.886792	0.438679	0.363208	0.198113	0.127962	0.07109	0.004739	0.004717	0.273585	0.570755	0.783019	1	0.018868	0.283019	0.438679	0.613208	0.858491	0.080189	0.216981	0.556604	0.900943	0.985849	0.40566	0.454976	0.023585	0.245283	0.448113	0.660377	0.929245	0.415094
0.320388	0.383495	0.296117	0.253659	0.239024	0.214634	0.029126	0.26699	0.480583	0.728155	1	0.009709	0.199029	0.538835	0.868932	0.995146	0.004854	0.262136	0.456311	0.669903	0.864078	0.398058	0.446602	0.15534	0.126829	0.058537	0	0.004854	0.276699	0.558252	0.81068	1	0.019417	0.300971	0.480583	0.621359	0.859223	0.082524	0.116505	0.257282	0.917476	0.990291	0.412621	0.429268	0.024272	0.257282	0.441748	0.65534	0.864078	0.432039
0.378641	0.300971	0.320388	0.196078	0.254902	0.186275	0.048544	0.213592	0.446602	0.669903	0.990291	0.058252	0.262136	0.495146	0.815534	1	0.009709	0.15534	0.466019	0.68932	0.941748	0.378641	0.417476	0.203883	0.137255	0.039216	0	0.009709	0.242718	0.427184	0.815534	1	0.019417	0.281553	0.621359	0.776699	0.941748	0.145631	0.184466	0.446602	0.495146	0.553398	0.485437	0.372549	0.019417	0.291262	0.592233	0.776699	0.951456	0.252427
0.269231	0.418269	0.3125	0.198068	0.236715	0.222222	0.009615	0.230769	0.427885	0.716346	0.985577	0.019231	0.192308	0.552885	0.822115	1	0.004808	0.298077	0.5	0.6875	0.913462	0.442308	0.4375	0.120192	0.130435	0.043478	0.004831	0.004808	0.302885	0.581731	0.826923	1	0.019231	0.3125	0.495192	0.658654	0.908654	0.081731	0.105769	0.235577	0.278846	0.971154	0.427885	0.454106	0.024038	0.254808	0.456731	0.677885	0.913462	0.399038
0.350515	0.247423	0.402062	0.177083	0.322917	0.239583	0.092784	0.237113	0.525773	0.721649	0.969072	0.030928	0.134021	0.340206	0.618557	0.989691	0.010309	0.298969	0.515464	0.752577	1	0.350515	0.443299	0.206186	0.177083	0.052083	0.010417	0.010309	0.134021	0.525773	0.71134	1	0.030928	0.298969	0.649485	0.793814	0.989691	0.14433	0.185567	0.453608	0.505155	0.587629	0.474227	0.5	0.020619	0.28866	0.525773	0.773196	0.979381	0.237113
0.348315	0.286517	0.365169	0.19774	0.271186	0.231638	0.016854	0.230337	0.466292	0.713483	1	0.022472	0.179775	0.47191	0.724719	0.994382	0.005618	0.275281	0.52809	0.769663	0.977528	0.432584	0.41573	0.151685	0.141243	0.050847	0.00565	0.005618	0.196629	0.52809	0.808989	1	0.016854	0.331461	0.494382	0.696629	0.983146	0.073034	0.101124	0.258427	0.623596	0.865169	0.460674	0.508475	0.011236	0.258427	0.483146	0.730337	0.983146	0.325843
0.297297	0.335135	0.367568	0.157609	0.271739	0.266304	0.010811	0.227027	0.535135	0.751351	1	0.032432	0.2	0.383784	0.745946	0.989189	0.005405	0.264865	0.524324	0.72973	0.983784	0.416216	0.464865	0.118919	0.130435	0.032609	0	0.005405	0.291892	0.535135	0.821622	1	0.010811	0.351351	0.545946	0.718919	0.989189	0.075676	0.097297	0.243243	0.27027	0.756757	0.459459	0.51087	0.016216	0.286486	0.497297	0.735135	0.989189	0.362162
0.348361	0.385246	0.266393	0.255144	0.209877	0.222222	0.016393	0.241803	0.483607	0.811475	1	0.008197	0.245902	0.545082	0.786885	0.983607	0.004098	0.229508	0.434426	0.606557	0.852459	0.459016	0.336066	0.204918	0.106996	0.074074	0.00823	0.004098	0.348361	0.622951	0.79918	1	0.020492	0.188525	0.385246	0.54918	0.778689	0.077869	0.209016	0.581967	0.844262	0.963115	0.393443	0.395062	0.020492	0.22541	0.401639	0.610656	0.946721	0.405738
0.33945	0.376147	0.284404	0.225806	0.202765	0.262673	0.041284	0.302752	0.518349	0.779817	1	0.009174	0.233945	0.509174	0.729358	0.986239	0.004587	0.188073	0.46789	0.692661	0.90367	0.440367	0.426606	0.133028	0.119816	0.046083	0	0.004587	0.311927	0.642202	0.848624	1	0.013761	0.288991	0.440367	0.605505	0.834862	0.077982	0.105505	0.233945	0.880734	0.958716	0.422018	0.460829	0.018349	0.270642	0.440367	0.669725	0.894495	0.357798
0.295082	0.327869	0.377049	0.197802	0.258242	0.274725	0.016393	0.245902	0.47541	0.73224	1	0.038251	0.196721	0.469945	0.704918	0.983607	0.005464	0.273224	0.513661	0.786885	0.994536	0.409836	0.480874	0.10929	0.142857	0.032967	0	0.005464	0.213115	0.535519	0.825137	1	0.016393	0.349727	0.530055	0.721311	0.994536	0.092896	0.114754	0.256831	0.284153	0.759563	0.453552	0.494505	0.021858	0.26776	0.497268	0.748634	0.994536	0.387978
0.366667	0.342857	0.290476	0.244019	0.239234	0.186603	0.028571	0.238095	0.5	0.790476	1	0.009524	0.261905	0.533333	0.77619	0.990476	0.004762	0.228571	0.457143	0.652381	0.890476	0.447619	0.380952	0.171429	0.119617	0.062201	0.004785	0.004762	0.27619	0.633333	0.819048	1	0.009524	0.290476	0.433333	0.609524	0.852381	0.07619	0.214286	0.257143	0.747619	0.952381	0.428571	0.45933	0.014286	0.242857	0.438095	0.657143	0.957143	0.371429
0.270142	0.407583	0.322275	0.190476	0.209524	0.271429	0.037915	0.208531	0.374408	0.691943	0.971564	0.009479	0.222749	0.526066	0.819905	1	0.004739	0.2891	0.49763	0.7109	0.943128	0.464455	0.374408	0.161137	0.128571	0.061905	0.004762	0.004739	0.265403	0.56872	0.78673	1	0.009479	0.28436	0.43128	0.611374	0.85782	0.07109	0.208531	0.64455	0.881517	0.990521	0.417062	0.428571	0.014218	0.279621	0.450237	0.677725	0.981043	0.42654
0.284404	0.449541	0.266055	0.271889	0.175115	0.235023	0.013761	0.243119	0.53211	0.738532	1	0.009174	0.215596	0.5	0.798165	0.986239	0.004587	0.233945	0.477064	0.674312	0.894495	0.440367	0.408257	0.151376	0.110599	0.036866	0	0.004587	0.266055	0.545872	0.779817	1	0.018349	0.302752	0.472477	0.623853	0.857798	0.082569	0.114679	0.247706	0.908257	0.949541	0.412844	0.442396	0.022936	0.243119	0.440367	0.655963	0.922018	0.454128
0.363208	0.34434	0.292453	0.232227	0.255924	0.194313	0.014151	0.245283	0.462264	0.740566	1	0.009434	0.20283	0.533019	0.787736	0.990566	0.004717	0.259434	0.471698	0.698113	0.896226	0.415094	0.410377	0.174528	0.127962	0.052133	0.004739	0.004717	0.221698	0.551887	0.783019	1	0.028302	0.311321	0.471698	0.688679	0.896226	0.09434	0.226415	0.485849	0.665094	0.981132	0.40566	0.473934	0.033019	0.245283	0.448113	0.669811	0.90566	0.367925
0.326923	0.370192	0.302885	0.270531	0.207729	0.241546	0.009615	0.225962	0.432692	0.677885	1	0.014423	0.264423	0.5625	0.807692	0.995192	0.004808	0.235577	0.475962	0.706731	0.908654	0.418269	0.394231	0.1875	0.130435	0.05314	0.004831	0.004808	0.283654	0.596154	0.807692	1	0.014423	0.293269	0.442308	0.610577	0.884615	0.076923	0.115385	0.264423	0.783654	0.961538	0.427885	0.444444	0.019231	0.25	0.456731	0.682692	0.889423	0.360577
0.319635	0.424658	0.255708	0.302752	0.169725	0.192661	0.013699	0.260274	0.515982	0.789954	1	0.009132	0.200913	0.520548	0.73516	0.995434	0.004566	0.296804	0.479452	0.666667	0.894977	0.406393	0.420091	0.173516	0.119266	0.055046	0	0.004566	0.273973	0.611872	0.789954	1	0.027397	0.30137	0.47032	0.598174	0.821918	0.086758	0.123288	0.26484	0.872146	0.986301	0.406393	0.412844	0.031963	0.251142	0.43379	0.648402	0.858447	0.43379
0.336842	0.336842	0.326316	0.21164	0.259259	0.26455	0.021053	0.242105	0.478947	0.736842	1	0.010526	0.184211	0.431579	0.731579	0.984211	0.005263	0.321053	0.542105	0.757895	0.973684	0.405263	0.473684	0.121053	0.164021	0.037037	0.005291	0.005263	0.284211	0.589474	0.815789	1	0.010526	0.336842	0.531579	0.705263	0.978947	0.078947	0.1	0.242105	0.289474	0.736842	0.468421	0.507937	0.015789	0.257895	0.478947	0.726316	0.984211	0.342105
0.262887	0.371134	0.365979	0.207254	0.207254	0.284974	0.030928	0.195876	0.515464	0.747423	0.958763	0.020619	0.273196	0.5	0.783505	1	0.005155	0.231959	0.469072	0.71134	0.979381	0.417526	0.463918	0.118557	0.124352	0.041451	0	0.005155	0.283505	0.582474	0.824742	1	0.010309	0.324742	0.510309	0.675258	0.93299	0.082474	0.103093	0.242268	0.273196	0.984536	0.453608	0.487047	0.015464	0.262887	0.474227	0.695876	0.938144	0.386598
0.29703	0.391089	0.311881	0.19403	0.233831	0.258706	0.009901	0.242574	0.445545	0.673267	0.985149	0.014851	0.232673	0.584158	0.80198	1	0.00495	0.237624	0.460396	0.69802	0.955446	0.430693	0.39604	0.173267	0.134328	0.054726	0.004975	0.00495	0.272277	0.579208	0.80198	1	0.014851	0.29703	0.450495	0.643564	0.89604	0.079208	0.113861	0.262376	0.777228	0.960396	0.425743	0.447761	0.019802	0.252475	0.455446	0.678218	0.90099	0.410891
0.364035	0.355263	0.280702	0.251101	0.220264	0.180617	0.008772	0.22807	0.52193	0.837719	1	0.013158	0.236842	0.508772	0.789474	0.982456	0.004386	0.263158	0.447368	0.635965	0.820175	0.438596	0.390351	0.171053	0.105727	0.052863	0	0.004386	0.289474	0.592105	0.807018	1	0.008772	0.276316	0.434211	0.578947	0.798246	0.065789	0.192982	0.600877	0.881579	0.986842	0.385965	0.414097	0.017544	0.245614	0.407895	0.614035	0.925439	0.407895
0.34375	0.330357	0.325893	0.215247	0.282511	0.206278	0.017857	0.245536	0.477679	0.799107	1	0.008929	0.200893	0.513393	0.709821	0.995536	0.004464	0.254464	0.482143	0.705357	0.9375	0.459821	0.379464	0.160714	0.116592	0.06278	0.008969	0.004464	0.325893	0.629464	0.821429	1	0.022321	0.209821	0.424107	0.607143	0.857143	0.089286	0.125	0.272321	0.732143	0.924107	0.40625	0.430493	0.026786	0.25	0.4375	0.651786	0.9375	0.370536
0.2625	0.483333	0.254167	0.205021	0.175732	0.230126	0.025	0.195833	0.3625	0.641667	1	0.008333	0.320833	0.616667	0.85	0.9875	0.004167	0.25	0.404167	0.608333	0.7875	0.375	0.333333	0.291667	0.112971	0.054393	0.004184	0.004167	0.2375	0.508333	0.691667	1	0.016667	0.2625	0.391667	0.55	0.766667	0.075	0.229167	0.825	0.895833	0.9875	0.416667	0.468619	0.020833	0.258333	0.445833	0.6625	0.970833	0.5125
0.36	0.384	0.256	0.289157	0.172691	0.232932	0.028	0.292	0.56	0.832	1	0.008	0.232	0.504	0.772	0.996	0.004	0.22	0.42	0.644	0.904	0.448	0.312	0.24	0.096386	0.088353	0.008032	0.004	0.216	0.548	0.756	1	0.084	0.308	0.428	0.58	0.78	0.024	0.26	0.616	0.868	0.992	0.408	0.433735	0.016	0.196	0.416	0.608	0.904	0.416
0.355	0.32	0.325	0.221106	0.251256	0.226131	0.01	0.19	0.425	0.67	0.985	0.015	0.215	0.525	0.78	1	0.005	0.31	0.535	0.75	0.945	0.45	0.445	0.105	0.130653	0.030151	0	0.005	0.29	0.59	0.835	1	0.015	0.315	0.495	0.67	0.92	0.085	0.105	0.235	0.26	0.705	0.445	0.462312	0.02	0.25	0.475	0.71	0.94	0.375
0.4	0.27907	0.32093	0.214953	0.247664	0.205607	0.023256	0.260465	0.539535	0.813953	1	0.013953	0.209302	0.460465	0.702326	0.948837	0.004651	0.251163	0.497674	0.711628	0.962791	0.446512	0.386047	0.167442	0.135514	0.060748	0.004673	0.004651	0.311628	0.6	0.813953	1	0.009302	0.27907	0.446512	0.623256	0.962791	0.069767	0.204651	0.246512	0.753488	0.930233	0.44186	0.392523	0.009302	0.232558	0.44186	0.67907	0.962791	0.297674
0.359223	0.325243	0.315534	0.190244	0.253659	0.209756	0.009709	0.218447	0.456311	0.786408	1	0.014563	0.247573	0.524272	0.76699	0.970874	0.004854	0.271845	0.475728	0.674757	0.956311	0.417476	0.398058	0.184466	0.117073	0.068293	0.009756	0.004854	0.378641	0.650485	0.81068	1	0.009709	0.174757	0.402913	0.572816	0.849515	0.072816	0.208738	0.533981	0.883495	0.956311	0.378641	0.409756	0.014563	0.213592	0.427184	0.621359	0.956311	0.320388
0.321244	0.378238	0.300518	0.239583	0.255208	0.229167	0.015544	0.238342	0.476684	0.725389	1	0.010363	0.207254	0.497409	0.740933	0.979275	0.005181	0.279793	0.528497	0.73057	0.989637	0.419689	0.466321	0.11399	0.140625	0.026042	0.005208	0.005181	0.300518	0.590674	0.834197	1	0.015544	0.326425	0.523316	0.694301	0.979275	0.07772	0.098446	0.238342	0.264249	0.725389	0.46114	0.489583	0.015544	0.264249	0.476684	0.704663	0.974093	0.419689
0.350711	0.364929	0.28436	0.238095	0.261905	0.171429	0.009479	0.21327	0.445498	0.687204	1	0.037915	0.28436	0.56872	0.862559	0.985782	0.004739	0.251185	0.450237	0.677725	0.85782	0.445498	0.379147	0.175355	0.119048	0.071429	0.004762	0.004739	0.274882	0.601896	0.815166	1	0.014218	0.293839	0.436019	0.611374	0.853081	0.080569	0.218009	0.260664	0.748815	0.990521	0.421801	0.447619	0.018957	0.246445	0.436019	0.672986	0.943128	0.398104
0.299465	0.358289	0.342246	0.22043	0.204301	0.241935	0.037433	0.294118	0.44385	0.721925	1	0.016043	0.176471	0.582888	0.780749	0.994652	0.005348	0.278075	0.486631	0.73262	0.946524	0.44385	0.427807	0.128342	0.155914	0.037634	0.005376	0.005348	0.299465	0.604278	0.84492	1	0.02139	0.315508	0.481283	0.663102	0.935829	0.085561	0.112299	0.256684	0.28877	0.823529	0.449198	0.473118	0.02139	0.278075	0.481283	0.716578	0.941176	0.379679
0.3	0.404545	0.295455	0.205479	0.191781	0.260274	0.013636	0.236364	0.518182	0.763636	1	0.009091	0.254545	0.540909	0.818182	0.995455	0.004545	0.240909	0.427273	0.613636	0.918182	0.436364	0.372727	0.190909	0.127854	0.063927	0.009132	0.004545	0.313636	0.590909	0.8	1	0.018182	0.209091	0.427273	0.604545	0.840909	0.077273	0.213636	0.540909	0.881818	0.990909	0.413636	0.429224	0.022727	0.240909	0.431818	0.65	0.909091	0.422727
0.340659	0.395604	0.263736	0.355556	0.144444	0.2	0.043956	0.186813	0.43956	0.725275	1	0.021978	0.197802	0.516484	0.714286	0.989011	0.010989	0.32967	0.56044	0.747253	0.967033	0.593407	0.373626	0.032967	0.155556	0.022222	0	0.010989	0.142857	0.362637	0.593407	1	0.252747	0.395604	0.659341	0.769231	0.912088	0.945055	0.945055	0.945055	0.956044	0.967033	0.395604	0.333333	0.098901	0.384615	0.516484	0.67033	0.912088	0.406593
0.492537	0.268657	0.238806	0.287879	0.363636	0.075758	0.029851	0.253731	0.462687	0.731343	1	0.044776	0.179104	0.507463	0.61194	0.955224	0.014925	0.208955	0.41791	0.686567	0.895522	0.19403	0	0.80597	0	0.090909	0	0.014925	0.044776	0.567164	0.940299	1	0	0	0	0	0	0.059701	0.268657	0.477612	0.716418	0.925373	0.313433	0.454545	0.089552	0.313433	0.432836	0.641791	0.895522	0.283582
0.47619	0.222222	0.301587	0.177419	0.403226	0.064516	0.031746	0.190476	0.428571	0.714286	0.952381	0.047619	0.253968	0.555556	0.809524	1	0.015873	0.222222	0.412698	0.68254	0.904762	0.142857	0	0.857143	0	0.129032	0	0.015873	0.031746	0.15873	0.619048	1	0	0	0	0	0	0.047619	0.269841	0.492063	0.730159	0.952381	0.31746	0.451613	0.047619	0.333333	0.460317	0.730159	0.904762	0.222222
0.450704	0.309859	0.239437	0.271429	0.285714	0.128571	0.098592	0.28169	0.591549	0.816901	1	0.028169	0.211268	0.521127	0.619718	0.915493	0.014085	0.084507	0.338028	0.661972	0.943662	0.295775	0	0.704225	0	0.114286	0	0.014085	0.070423	0.535211	0.605634	1	0	0	0	0	0	0.084507	0.28169	0.464789	0.746479	0.957746	0.338028	0.457143	0.056338	0.295775	0.450704	0.71831	0.943662	0.352113
0.338816	0.388158	0.273026	0.343234	0.171617	0.191419	0.013158	0.190789	0.427632	0.75	0.993421	0.006579	0.325658	0.572368	0.805921	0.996711	0.003289	0.213816	0.4375	0.684211	1	0.641447	0.296053	0.0625	0.132013	0.039604	0	0.003289	0.240132	0.539474	0.802632	1	0.009868	0.266447	0.398026	0.628289	0.980263	0.069079	0.078947	0.161184	0.819079	0.842105	0.506579	0.330033	0.009868	0.328947	0.532895	0.710526	0.973684	0.358553
0.296748	0.45935	0.243902	0.293878	0.142857	0.179592	0.012195	0.247967	0.487805	0.719512	1	0.00813	0.284553	0.54065	0.800813	0.98374	0.004065	0.207317	0.390244	0.642276	0.96748	0.646341	0.239837	0.113821	0.130612	0.065306	0	0.004065	0.284553	0.504065	0.800813	1	0.162602	0.231707	0.382114	0.569106	0.97561	0.02439	0.060976	0.707317	0.735772	0.926829	0.512195	0.302041	0.020325	0.243902	0.434959	0.646341	0.96748	0.430894
0.363636	0.46281	0.173554	0.4	0.141667	0.1	0.016529	0.280992	0.570248	0.760331	1	0.033058	0.330579	0.578512	0.818182	0.991736	0.008264	0.132231	0.256198	0.347107	0.702479	0.61157	0.173554	0.214876	0.083333	0.066667	0	0.008264	0.231405	0.553719	0.842975	1	0.090909	0.123967	0.198347	0.280992	0.413223	0.454545	0.495868	0.694215	0.743802	0.809917	0.247934	0.266667	0.041322	0.181818	0.305785	0.371901	0.77686	0.487603
0.279412	0.411765	0.308824	0.19403	0.208955	0.253731	0.029412	0.147059	0.573529	0.882353	1	0.058824	0.25	0.441176	0.676471	0.941176	0.014706	0.220588	0.367647	0.588235	0.897059	0.529412	0.25	0.220588	0.089552	0.029851	0	0.014706	0.132353	0.426471	0.647059	1	0.161765	0.205882	0.323529	0.455882	0.529412	0.691176	0.720588	0.779412	0.838235	0.897059	0.411765	0.477612	0.073529	0.264706	0.529412	0.661765	0.897059	0.382353
0.390244	0.280488	0.329268	0.17284	0.308642	0.197531	0.02439	0.280488	0.597561	0.792683	1	0.073171	0.170732	0.329268	0.560976	0.902439	0.012195	0.256098	0.47561	0.731707	0.963415	0.634146	0.268293	0.097561	0.123457	0.024691	0	0.012195	0.231707	0.52439	0.841463	1	0.134146	0.182927	0.304878	0.426829	0.621951	0.682927	0.695122	0.719512	0.743902	0.768293	0.353659	0.395062	0.060976	0.268293	0.45122	0.54878	0.804878	0.304878
0.402174	0.358696	0.23913	0.373626	0.186813	0.175824	0.054348	0.25	0.5	0.76087	1	0.021739	0.23913	0.521739	0.728261	0.98913	0.01087	0.141304	0.413043	0.597826	0.934783	0.315217	0.271739	0.413043	0.087912	0.10989	0.021978	0.01087	0.456522	0.673913	0.75	1	0.065217	0.130435	0.76087	0.826087	0.945652	0.032609	0.25	0.358696	0.5	0.978261	0.347826	0.43956	0.065217	0.326087	0.532609	0.695652	0.956522	0.391304
0.350649	0.402597	0.246753	0.342105	0.236842	0.171053	0.025974	0.168831	0.467532	0.805195	0.987013	0.077922	0.25974	0.441558	0.662338	1	0.012987	0.181818	0.480519	0.701299	0.935065	0.584416	0.298701	0.116883	0.131579	0.026316	0	0.012987	0.233766	0.519481	0.727273	1	0.142857	0.194805	0.311688	0.493506	0.701299	0.766234	0.779221	0.805195	0.831169	0.87013	0.363636	0.394737	0.064935	0.285714	0.506494	0.61039	0.87013	0.428571
0.456522	0.304348	0.23913	0.252747	0.197802	0.142857	0.032609	0.26087	0.641304	0.858696	1	0.021739	0.23913	0.521739	0.706522	0.934783	0.01087	0.184783	0.380435	0.5	0.793478	0.630435	0.25	0.119565	0.10989	0.043956	0	0.01087	0.217391	0.5	0.815217	1	0.141304	0.184783	0.304348	0.423913	0.597826	0.641304	0.652174	0.684783	0.717391	0.836957	0.347826	0.351648	0.065217	0.206522	0.434783	0.532609	0.728261	0.369565
0.402062	0.329897	0.268041	0.3125	0.208333	0.229167	0.020619	0.309278	0.618557	0.814433	0.989691	0.041237	0.247423	0.474227	0.701031	0.958763	0.010309	0.14433	0.391753	0.56701	1	0.56701	0.268041	0.164948	0.104167	0.083333	0	0.010309	0.216495	0.494845	0.845361	1	0.103093	0.154639	0.268041	0.381443	0.556701	0.597938	0.628866	0.670103	0.742268	0.969072	0.350515	0.333333	0.051546	0.185567	0.402062	0.494845	0.969072	0.350515
0.43662	0.309859	0.253521	0.185714	0.257143	0.185714	0.028169	0.28169	0.492958	0.859155	1	0.084507	0.15493	0.535211	0.647887	0.915493	0.014085	0.197183	0.450704	0.56338	0.901408	0.478873	0.338028	0.183099	0.142857	0.028571	0	0.014085	0.112676	0.422535	0.633803	1	0.140845	0.211268	0.352113	0.492958	0.71831	0.788732	0.816901	0.859155	0.901408	0.957746	0.408451	0.428571	0.070423	0.239437	0.507042	0.619718	0.901408	0.338028
0.354839	0.387097	0.258065	0.206522	0.195652	0.25	0.021505	0.354839	0.666667	0.860215	1	0.032258	0.247312	0.44086	0.602151	0.924731	0.010753	0.172043	0.397849	0.612903	0.967742	0.569892	0.236559	0.193548	0.108696	0.086957	0	0.010753	0.215054	0.462366	0.752688	1	0.107527	0.150538	0.268817	0.376344	0.548387	0.602151	0.634409	0.688172	0.817204	0.967742	0.311828	0.326087	0.053763	0.182796	0.387097	0.473118	0.688172	0.408602
0.367089	0.341772	0.291139	0.192308	0.24359	0.179487	0.025316	0.240506	0.56962	0.721519	0.974684	0.050633	0.227848	0.379747	0.759494	1	0.012658	0.177215	0.417722	0.64557	0.898734	0.696203	0.21519	0.088608	0.102564	0.025641	0	0.012658	0.240506	0.518987	0.734177	1	0.139241	0.177215	0.265823	0.417722	0.670886	0.746835	0.746835	0.772152	0.797468	0.822785	0.443038	0.384615	0.063291	0.227848	0.405063	0.556962	0.898734	0.367089
0.313433	0.447761	0.238806	0.227273	0.212121	0.19697	0.029851	0.343284	0.507463	0.850746	1	0.044776	0.19403	0.402985	0.686567	0.985075	0.014925	0.238806	0.462687	0.58209	0.910448	0.522388	0.343284	0.134328	0.151515	0.030303	0	0.014925	0.119403	0.402985	0.626866	1	0.164179	0.223881	0.447761	0.641791	0.776119	0.850746	0.865672	0.895522	0.925373	0.970149	0.402985	0.484848	0.074627	0.238806	0.522388	0.641791	0.970149	0.447761
0.316667	0.45	0.233333	0.271186	0.135593	0.237288	0.05	0.166667	0.316667	0.65	0.933333	0.033333	0.2	0.45	0.716667	0.983333	0.016667	0.3	0.6	0.766667	1	0.7	0.116667	0.183333	0.101695	0.067797	0	0.016667	0.166667	0.55	0.716667	1	0.533333	0.533333	0.75	0.95	0.983333	0.216667	0.233333	0.3	0.35	0.4	0.283333	0.474576	0.1	0.416667	0.6	0.766667	0.966667	0.416667
0.435685	0.360996	0.20332	0.333333	0.229167	0.158333	0.012448	0.278008	0.502075	0.738589	1	0.008299	0.224066	0.460581	0.717842	0.995851	0.004149	0.232365	0.489627	0.780083	0.991701	0.585062	0.120332	0.294606	0.075	0.091667	0	0.004149	0.319502	0.560166	0.717842	1	0.058091	0.33195	0.763485	0.846473	0.991701	0.020747	0.161826	0.26556	0.692946	0.929461	0.340249	0.466667	0.062241	0.273859	0.59751	0.792531	0.991701	0.410788
0.4	0.363636	0.236364	0.259259	0.185185	0.111111	0.054545	0.236364	0.581818	0.745455	0.981818	0.036364	0.272727	0.381818	0.563636	0.854545	0.018182	0.163636	0.363636	0.781818	1	0.509091	0.490909	0	0.148148	0	0	0.018182	0.290909	0.509091	0.709091	1	0.127273	0.218182	0.418182	0.818182	0.945455	0	0	0	0	0	0.327273	0.407407	0.163636	0.254545	0.418182	0.672727	0.909091	0.327273
0.327273	0.409091	0.263636	0.302752	0.155963	0.211009	0.036364	0.209091	0.472727	0.690909	0.990909	0.018182	0.236364	0.518182	0.718182	0.981818	0.009091	0.245455	0.454545	0.763636	1	0.490909	0.418182	0.090909	0.110092	0.036697	0	0.009091	0.218182	0.527273	0.736364	1	0.036364	0.127273	0.463636	0.690909	0.954545	0.327273	0.336364	0.363636	0.381818	0.872727	0.518182	0.256881	0.036364	0.236364	0.463636	0.745455	0.972727	0.345455
0.34375	0.375	0.28125	0.2	0.263158	0.136842	0.03125	0.260417	0.385417	0.677083	0.989583	0.052083	0.1875	0.5625	0.75	0.96875	0.010417	0.25	0.458333	0.645833	1	0.46875	0.166667	0.364583	0.105263	0.084211	0	0.010417	0.177083	0.458333	0.666667	1	0.083333	0.40625	0.541667	0.604167	0.697917	0.145833	0.270833	0.364583	0.864583	0.96875	0.458333	0.484211	0.041667	0.25	0.552083	0.729167	0.916667	0.395833
0.329412	0.4	0.270588	0.22619	0.22619	0.22619	0.035294	0.294118	0.517647	0.682353	0.988235	0.023529	0.188235	0.435294	0.776471	0.976471	0.011765	0.164706	0.458824	0.670588	1	0.529412	0.258824	0.211765	0.142857	0.047619	0	0.011765	0.2	0.517647	0.788235	1	0.070588	0.552941	0.647059	0.764706	0.941176	0.141176	0.235294	0.294118	0.341176	0.4	0.447059	0.52381	0.058824	0.270588	0.6	0.776471	0.952941	0.329412
0.306931	0.39604	0.29703	0.21	0.22	0.29	0.069307	0.306931	0.49505	0.861386	1	0.019802	0.158416	0.415842	0.693069	0.980198	0.009901	0.267327	0.514851	0.653465	0.990099	0.405941	0.178218	0.415842	0.06	0.04	0	0.009901	0.128713	0.405941	0.623762	1	0.069307	0.475248	0.524752	0.564356	0.663366	0.178218	0.267327	0.772277	0.871287	0.980198	0.445545	0.5	0.029703	0.237624	0.524752	0.693069	0.950495	0.39604
0.350515	0.484536	0.164948	0.25	0.125	0.15625	0.030928	0.216495	0.474227	0.670103	0.907216	0.020619	0.247423	0.515464	0.835052	1	0.010309	0.195876	0.381443	0.71134	0.938144	0.597938	0.134021	0.268041	0.083333	0.0625	0	0.010309	0.216495	0.43299	0.804124	1	0.164948	0.185567	0.278351	0.350515	0.958763	0.051546	0.515464	0.639175	0.701031	0.773196	0.257732	0.354167	0.164948	0.278351	0.505155	0.690722	0.927835	0.443299
0.375	0.359375	0.265625	0.285714	0.206349	0.222222	0.046875	0.25	0.5	0.8125	1	0.03125	0.109375	0.375	0.640625	0.9375	0.015625	0.3125	0.53125	0.71875	0.984375	0.71875	0.171875	0.109375	0.126984	0.063492	0	0.015625	0.234375	0.5625	0.734375	1	0.265625	0.28125	0.421875	0.53125	0.875	0.078125	0.078125	0.109375	0.78125	0.8125	0.28125	0.380952	0.265625	0.328125	0.53125	0.625	0.875	0.375
0.56	0.24	0.2	0.306122	0.163265	0.102041	0.06	0.28	0.62	0.8	1	0.04	0.14	0.4	0.6	0.96	0.02	0.24	0.5	0.54	0.86	0.62	0.1	0.28	0.040816	0.081633	0	0.02	0.34	0.6	0.84	1	0.48	0.48	0.5	0.52	0.56	0.12	0.16	0.24	0.3	0.7	0.24	0.244898	0.24	0.44	0.5	0.56	0.86	0.28
0.327869	0.348361	0.32377	0.226337	0.218107	0.222222	0.032787	0.290984	0.487705	0.786885	0.995902	0.008197	0.233607	0.540984	0.692623	1	0.004098	0.168033	0.45082	0.737705	0.987705	0.536885	0.315574	0.147541	0.098765	0.032922	0.00823	0.004098	0.29918	0.545082	0.680328	1	0.012295	0.118852	0.344262	0.704918	0.848361	0.266393	0.409836	0.909836	0.946721	0.987705	0.54918	0.337449	0.016393	0.221311	0.512295	0.737705	0.987705	0.32377
0.316742	0.361991	0.321267	0.204545	0.240909	0.236364	0.00905	0.253394	0.434389	0.719457	0.995475	0.013575	0.276018	0.579186	0.737557	1	0.004525	0.180995	0.466063	0.751131	0.963801	0.59276	0.361991	0.045249	0.109091	0.027273	0	0.004525	0.303167	0.570136	0.751131	1	0.022624	0.140271	0.411765	0.81448	0.968326	0.330317	0.343891	0.357466	0.60181	0.615385	0.542986	0.309091	0.022624	0.226244	0.552036	0.773756	0.977376	0.375566
0.333333	0.375	0.291667	0.219895	0.225131	0.230366	0.010417	0.270833	0.479167	0.729167	1	0.046875	0.255208	0.541667	0.744792	0.96875	0.005208	0.166667	0.458333	0.807292	0.994792	0.572917	0.385417	0.041667	0.120419	0.015707	0.005236	0.005208	0.317708	0.598958	0.739583	1	0.015625	0.161458	0.4375	0.817708	0.984375	0.28125	0.286458	0.296875	0.307292	0.5625	0.552083	0.397906	0.010417	0.21875	0.541667	0.765625	0.979167	0.364583
0.324138	0.441379	0.234483	0.307958	0.16609	0.176471	0.010345	0.262069	0.524138	0.8	1	0.013793	0.303448	0.551724	0.793103	0.996552	0.003448	0.127586	0.372414	0.617241	0.934483	0.593103	0.310345	0.096552	0.100346	0.031142	0.00346	0.003448	0.324138	0.537931	0.775862	1	0.013793	0.12069	0.337931	0.603448	0.937931	0.224138	0.244828	0.834483	0.872414	0.931034	0.468966	0.32526	0.013793	0.186207	0.431034	0.62069	0.97931	0.472414
0.419355	0.348387	0.232258	0.28479	0.177994	0.161812	0.006452	0.232258	0.587097	0.825806	1	0.019355	0.329032	0.493548	0.735484	0.993548	0.003226	0.16129	0.387097	0.606452	0.848387	0.567742	0.264516	0.167742	0.084142	0.038835	0	0.003226	0.280645	0.483871	0.696774	1	0.009677	0.106452	0.306452	0.558065	0.725806	0.206452	0.764516	0.816129	0.858065	0.977419	0.416129	0.28479	0.009677	0.164516	0.393548	0.577419	0.935484	0.341935
0.37218	0.319549	0.308271	0.218868	0.230189	0.211321	0.007519	0.229323	0.522556	0.815789	1	0.011278	0.266917	0.484962	0.62406	0.996241	0.003759	0.18797	0.530075	0.75188	0.954887	0.552632	0.342105	0.105263	0.10566	0.015094	0	0.003759	0.285714	0.515038	0.721805	1	0.011278	0.131579	0.37218	0.676692	0.883459	0.236842	0.259398	0.928571	0.954887	0.981203	0.518797	0.354717	0.011278	0.24812	0.533835	0.714286	0.966165	0.330827
0.339726	0.353425	0.306849	0.236264	0.217033	0.230769	0.008219	0.306849	0.49589	0.747945	1	0.005479	0.224658	0.509589	0.753425	0.994521	0.00274	0.227397	0.476712	0.734247	0.989041	0.509589	0.279452	0.210959	0.093407	0.038462	0	0.00274	0.167123	0.586301	0.805479	1	0.10411	0.20274	0.564384	0.794521	0.986301	0.257534	0.312329	0.389041	0.534247	0.673973	0.534247	0.307692	0.027397	0.224658	0.506849	0.745205	0.986301	0.334247
0.298343	0.439227	0.262431	0.246537	0.166205	0.213296	0.008287	0.298343	0.533149	0.803867	1	0.005525	0.207182	0.455801	0.743094	0.997238	0.002762	0.273481	0.5	0.720994	0.991713	0.502762	0.11326	0.383978	0.066482	0.121884	0	0.002762	0.212707	0.436464	0.726519	1	0.013812	0.171271	0.417127	0.571823	0.690608	0.066298	0.345304	0.599448	0.823204	0.991713	0.480663	0.415512	0.01105	0.245856	0.447514	0.68232	0.991713	0.417127
0.372093	0.353488	0.274419	0.275701	0.200935	0.17757	0.009302	0.2	0.47907	0.739535	0.995349	0.046512	0.293023	0.446512	0.734884	1	0.004651	0.148837	0.562791	0.790698	0.990698	0.534884	0.148837	0.316279	0.084112	0.065421	0	0.004651	0.274419	0.418605	0.702326	1	0.009302	0.065116	0.567442	0.725581	0.934884	0.093023	0.195349	0.544186	0.804651	0.990698	0.516279	0.35514	0.013953	0.334884	0.511628	0.776744	0.990698	0.348837
0.364078	0.349515	0.286408	0.278049	0.180488	0.214634	0.009709	0.257282	0.480583	0.757282	0.990291	0.038835	0.237864	0.412621	0.68932	1	0.004854	0.18932	0.597087	0.786408	0.995146	0.504854	0.160194	0.334951	0.082927	0.063415	0.004878	0.004854	0.276699	0.402913	0.645631	1	0.009709	0.067961	0.597087	0.747573	0.941748	0.097087	0.203883	0.572816	0.796117	0.995146	0.509709	0.380488	0.014563	0.339806	0.529126	0.752427	0.995146	0.354369
0.331818	0.336364	0.331818	0.210046	0.246575	0.223744	0.013636	0.231818	0.490909	0.781818	0.995455	0.018182	0.286364	0.454545	0.663636	1	0.004545	0.204545	0.586364	0.759091	0.990909	0.536364	0.145455	0.318182	0.091324	0.073059	0	0.004545	0.277273	0.422727	0.659091	1	0.018182	0.118182	0.618182	0.759091	0.936364	0.05	0.240909	0.586364	0.804545	0.990909	0.513636	0.401826	0.009091	0.309091	0.545455	0.759091	0.990909	0.359091
0.372093	0.348837	0.27907	0.242991	0.172897	0.196262	0.013953	0.27907	0.534884	0.72093	1	0.009302	0.195349	0.35814	0.655814	0.990698	0.004651	0.353488	0.604651	0.818605	0.972093	0.525581	0.148837	0.325581	0.102804	0.065421	0	0.004651	0.265116	0.395349	0.646512	1	0.018605	0.074419	0.576744	0.748837	0.930233	0.097674	0.190698	0.548837	0.795349	0.986047	0.497674	0.345794	0.018605	0.32093	0.506977	0.75814	0.986047	0.32093
0.35545	0.383886	0.260664	0.3	0.180952	0.17619	0.009479	0.241706	0.549763	0.767773	1	0.014218	0.232227	0.398104	0.616114	0.990521	0.004739	0.260664	0.592417	0.796209	0.971564	0.535545	0.14218	0.322275	0.07619	0.066667	0	0.004739	0.265403	0.398104	0.691943	1	0.009479	0.056872	0.587678	0.739336	0.924171	0.094787	0.199052	0.554502	0.791469	0.981043	0.521327	0.342857	0.014218	0.331754	0.521327	0.748815	0.981043	0.36019
0.395904	0.331058	0.273038	0.270548	0.226027	0.167808	0.010239	0.228669	0.484642	0.764505	1	0.006826	0.204778	0.457338	0.59727	0.989761	0.003413	0.327645	0.641638	0.819113	0.996587	0.546075	0.201365	0.25256	0.085616	0.065068	0.003425	0.003413	0.255973	0.498294	0.641638	1	0.068259	0.191126	0.242321	0.720137	0.955631	0.013652	0.416382	0.682594	0.849829	0.993174	0.409556	0.349315	0.017065	0.423208	0.607509	0.8157	0.996587	0.34471
0.408451	0.305164	0.286385	0.221698	0.240566	0.150943	0.023474	0.225352	0.507042	0.769953	0.985915	0.00939	0.262911	0.413146	0.558685	1	0.004695	0.187793	0.605634	0.798122	0.995305	0.530516	0.14554	0.323944	0.084906	0.066038	0	0.004695	0.262911	0.403756	0.647887	1	0.014085	0.061033	0.600939	0.755869	0.938967	0.098592	0.215962	0.57277	0.802817	0.995305	0.516432	0.386792	0.018779	0.319249	0.525822	0.755869	0.995305	0.309859
0.294393	0.364486	0.341121	0.215962	0.201878	0.215962	0.023364	0.275701	0.495327	0.761682	1	0.009346	0.233645	0.415888	0.654206	0.953271	0.004673	0.196262	0.565421	0.82243	0.995327	0.537383	0.140187	0.32243	0.065728	0.065728	0	0.004673	0.261682	0.397196	0.64486	1	0.018692	0.046729	0.598131	0.752336	0.934579	0.11215	0.214953	0.565421	0.799065	0.990654	0.514019	0.356808	0.018692	0.317757	0.523364	0.757009	0.990654	0.364486
0.410628	0.309179	0.280193	0.223301	0.252427	0.140777	0.009662	0.207729	0.497585	0.753623	0.990338	0.048309	0.285024	0.410628	0.676329	1	0.004831	0.169082	0.599034	0.78744	0.975845	0.541063	0.130435	0.328502	0.067961	0.067961	0	0.004831	0.26087	0.396135	0.647343	1	0.014493	0.067633	0.603865	0.753623	0.937198	0.091787	0.198068	0.570048	0.801932	0.995169	0.512077	0.378641	0.014493	0.31401	0.536232	0.758454	0.995169	0.304348
0.332226	0.421927	0.245847	0.32	0.163333	0.16	0.006645	0.23588	0.511628	0.76412	1	0.013289	0.245847	0.465116	0.770764	0.996678	0.003322	0.225914	0.518272	0.657807	0.966777	0.581395	0.106312	0.312292	0.06	0.073333	0	0.003322	0.245847	0.501661	0.777409	1	0.016611	0.053156	0.418605	0.528239	0.657807	0.079734	0.365449	0.554817	0.717608	0.990033	0.495017	0.326667	0.016611	0.285714	0.498339	0.757475	0.966777	0.458472
0.310954	0.374558	0.314488	0.237589	0.202128	0.237589	0.010601	0.24735	0.477032	0.713781	0.985866	0.053004	0.257951	0.45583	0.717314	0.989399	0.003534	0.219081	0.565371	0.805654	1	0.540636	0.130742	0.328622	0.074468	0.088652	0.003546	0.003534	0.268551	0.424028	0.685512	1	0.09894	0.144876	0.597173	0.798587	0.957597	0.007067	0.219081	0.547703	0.749117	0.992933	0.501767	0.404255	0.007067	0.325088	0.501767	0.763251	0.996466	0.363958
0.373874	0.382883	0.243243	0.312217	0.18552	0.171946	0.013514	0.225225	0.45045	0.725225	0.986486	0.009009	0.265766	0.472973	0.752252	1	0.004505	0.171171	0.558559	0.738739	0.936937	0.54955	0.130631	0.31982	0.072398	0.072398	0	0.004505	0.256757	0.405405	0.68018	1	0.018018	0.072072	0.563063	0.702703	0.878378	0.094595	0.193694	0.612613	0.828829	0.990991	0.5	0.352941	0.018018	0.31982	0.504505	0.738739	0.981982	0.396396
0.4	0.339535	0.260465	0.280374	0.242991	0.135514	0.009302	0.24186	0.47907	0.702326	0.981395	0.027907	0.255814	0.423256	0.683721	1	0.004651	0.186047	0.660465	0.832558	0.990698	0.539535	0.144186	0.316279	0.084112	0.065421	0	0.004651	0.274419	0.418605	0.702326	1	0.009302	0.074419	0.572093	0.725581	0.906977	0.097674	0.2	0.548837	0.776744	0.962791	0.511628	0.336449	0.013953	0.330233	0.506977	0.734884	0.962791	0.395349
0.417178	0.358896	0.223926	0.32	0.181538	0.141538	0.021472	0.300613	0.555215	0.791411	1	0.006135	0.211656	0.496933	0.769939	0.981595	0.003067	0.251534	0.43865	0.570552	0.93865	0.493865	0.095092	0.411043	0.055385	0.073846	0	0.003067	0.214724	0.411043	0.674847	1	0.01227	0.046012	0.374233	0.481595	0.601227	0.064417	0.358896	0.631902	0.858896	0.990798	0.447853	0.326154	0.01227	0.248466	0.435583	0.613497	0.981595	0.386503
0.387234	0.306383	0.306383	0.260684	0.269231	0.153846	0.012766	0.26383	0.519149	0.748936	0.982979	0.008511	0.246809	0.382979	0.723404	1	0.004255	0.174468	0.53617	0.761702	0.991489	0.540426	0.148936	0.310638	0.094017	0.068376	0	0.004255	0.259574	0.404255	0.73617	1	0.012766	0.06383	0.531915	0.757447	0.987234	0.089362	0.187234	0.578723	0.795745	0.957447	0.519149	0.358974	0.017021	0.319149	0.502128	0.753191	0.991489	0.32766
0.319048	0.37619	0.304762	0.248804	0.181818	0.205742	0.009524	0.219048	0.509524	0.766667	0.995238	0.02381	0.242857	0.433333	0.680952	1	0.004762	0.195238	0.585714	0.809524	0.980952	0.533333	0.152381	0.314286	0.076555	0.066986	0	0.004762	0.257143	0.4	0.695238	1	0.014286	0.080952	0.590476	0.747619	0.92381	0.109524	0.209524	0.566667	0.790476	0.980952	0.509524	0.373206	0.019048	0.319048	0.519048	0.752381	0.980952	0.37619
0.337963	0.37963	0.282407	0.269767	0.15814	0.237209	0.009259	0.277778	0.509259	0.731481	0.986111	0.018519	0.240741	0.430556	0.763889	1	0.00463	0.185185	0.523148	0.717593	0.944444	0.541667	0.143519	0.314815	0.083721	0.065116	0	0.00463	0.273148	0.416667	0.722222	1	0.009259	0.055556	0.564815	0.712963	0.893519	0.092593	0.194444	0.541667	0.763889	0.949074	0.49537	0.353488	0.013889	0.324074	0.509259	0.75	0.949074	0.375
0.347692	0.384615	0.267692	0.228395	0.182099	0.209877	0.015385	0.166154	0.486154	0.729231	1	0.006154	0.301538	0.523077	0.775385	0.990769	0.003077	0.227692	0.443077	0.698462	0.993846	0.510769	0.156923	0.332308	0.070988	0.070988	0.009259	0.003077	0.267692	0.513846	0.793846	1	0.009231	0.156923	0.224615	0.44	0.972308	0.092308	0.323077	0.646154	0.747692	0.966154	0.486154	0.345679	0.009231	0.236923	0.458462	0.673846	0.981538	0.378462
0.356757	0.308108	0.335135	0.173913	0.255435	0.271739	0.016216	0.27027	0.524324	0.735135	1	0.010811	0.151351	0.394595	0.718919	0.983784	0.005405	0.254054	0.497297	0.745946	0.967568	0.427027	0.194595	0.378378	0.086957	0.097826	0	0.005405	0.351351	0.594595	0.772973	1	0.183784	0.227027	0.491892	0.718919	0.967568	0.021622	0.113514	0.335135	0.605405	0.945946	0.508108	0.478261	0.016216	0.248649	0.518919	0.740541	0.967568	0.318919
0.338983	0.39548	0.265537	0.289773	0.215909	0.244318	0.022599	0.248588	0.463277	0.757062	1	0.011299	0.242938	0.536723	0.745763	0.99435	0.00565	0.231638	0.474576	0.728814	0.988701	0.440678	0.220339	0.338983	0.102273	0.068182	0	0.00565	0.282486	0.553672	0.694915	1	0.101695	0.288136	0.423729	0.728814	0.99435	0.011299	0.214689	0.474576	0.853107	0.960452	0.525424	0.477273	0.022599	0.254237	0.497175	0.723164	0.988701	0.418079
0.343915	0.354497	0.301587	0.260638	0.191489	0.25	0.015873	0.296296	0.550265	0.777778	1	0.010582	0.206349	0.449735	0.698413	0.994709	0.005291	0.216931	0.444444	0.677249	0.941799	0.449735	0.37037	0.179894	0.159574	0.021277	0	0.005291	0.21164	0.592593	0.851852	1	0.047619	0.179894	0.486772	0.666667	0.957672	0.338624	0.375661	0.42328	0.78836	0.835979	0.428571	0.478723	0.021164	0.359788	0.497354	0.666667	0.941799	0.333333
0.318681	0.412088	0.269231	0.287293	0.176796	0.259669	0.016484	0.274725	0.604396	0.796703	0.983516	0.010989	0.208791	0.43956	0.730769	1	0.005495	0.214286	0.467033	0.675824	0.950549	0.39011	0.406593	0.203297	0.154696	0.033149	0	0.005495	0.214286	0.571429	0.868132	1	0.016484	0.159341	0.472527	0.659341	0.961538	0.335165	0.379121	0.428571	0.796703	0.851648	0.461538	0.464088	0.032967	0.373626	0.510989	0.697802	0.950549	0.450549
0.344828	0.403941	0.251232	0.341584	0.207921	0.193069	0.014778	0.280788	0.527094	0.812808	1	0.009852	0.251232	0.482759	0.70936	0.985222	0.004926	0.17734	0.448276	0.684729	0.960591	0.413793	0.369458	0.216749	0.148515	0.039604	0	0.004926	0.197044	0.576355	0.866995	1	0.044335	0.172414	0.541872	0.694581	0.975369	0.285714	0.418719	0.472906	0.807882	0.862069	0.438424	0.485149	0.019704	0.29064	0.502463	0.674877	0.960591	0.403941
0.421569	0.279412	0.29902	0.241379	0.241379	0.162562	0.014706	0.205882	0.495098	0.754902	0.990196	0.009804	0.259804	0.490196	0.715686	0.980392	0.004902	0.254902	0.485294	0.740196	1	0.446078	0.382353	0.171569	0.167488	0.029557	0	0.004902	0.171569	0.54902	0.764706	1	0.078431	0.220588	0.509804	0.686275	0.965686	0.04902	0.416667	0.460784	0.823529	0.867647	0.460784	0.463054	0.019608	0.308824	0.519608	0.681373	0.955882	0.294118
0.40625	0.260417	0.333333	0.162304	0.272251	0.172775	0.010417	0.260417	0.546875	0.755208	1	0.020833	0.208333	0.484375	0.765625	0.96875	0.005208	0.234375	0.473958	0.682292	0.989583	0.395833	0.411458	0.192708	0.146597	0.031414	0	0.005208	0.260417	0.604167	0.848958	1	0.015625	0.145833	0.453125	0.640625	0.953125	0.317708	0.359375	0.40625	0.786458	0.838542	0.4375	0.450262	0.03125	0.348958	0.479167	0.640625	0.942708	0.229167
0.396739	0.298913	0.304348	0.262295	0.234973	0.218579	0.016304	0.222826	0.483696	0.782609	1	0.01087	0.244565	0.51087	0.793478	0.983696	0.005435	0.23913	0.478261	0.673913	0.923913	0.440217	0.375	0.184783	0.153005	0.021858	0	0.005435	0.211957	0.592391	0.853261	1	0.048913	0.190217	0.478261	0.663043	0.940217	0.326087	0.36413	0.413043	0.766304	0.815217	0.434783	0.502732	0.021739	0.347826	0.48913	0.673913	0.923913	0.293478
0.377778	0.316667	0.305556	0.251397	0.27933	0.184358	0.016667	0.2	0.5	0.772222	1	0.027778	0.277778	0.455556	0.7	0.977778	0.005556	0.238889	0.516667	0.727778	0.988889	0.4	0.394444	0.205556	0.145251	0.03352	0	0.005556	0.222222	0.538889	0.866667	1	0.038889	0.177778	0.483333	0.672222	0.972222	0.338889	0.383333	0.433333	0.805556	0.861111	0.488889	0.469274	0.027778	0.372222	0.516667	0.716667	0.961111	0.327778
0.316327	0.331633	0.352041	0.2	0.241026	0.235897	0.010204	0.229592	0.484694	0.709184	0.994898	0.02551	0.239796	0.510204	0.826531	1	0.005102	0.244898	0.459184	0.673469	0.989796	0.382653	0.403061	0.214286	0.164103	0.030769	0	0.005102	0.219388	0.515306	0.755102	1	0.015306	0.173469	0.47449	0.683673	0.989796	0.336735	0.382653	0.438776	0.790816	0.846939	0.479592	0.451282	0.020408	0.362245	0.505102	0.693878	0.959184	0.30102
0.34188	0.358974	0.299145	0.215517	0.215517	0.224138	0.051282	0.213675	0.42735	0.709402	0.991453	0.017094	0.299145	0.615385	0.735043	1	0.008547	0.179487	0.444444	0.74359	0.982906	0.367521	0.179487	0.452991	0.086207	0.103448	0	0.008547	0.358974	0.57265	0.760684	1	0.025641	0.059829	0.393162	0.623932	0.820513	0.094017	0.196581	0.478632	0.709402	0.982906	0.512821	0.396552	0.034188	0.324786	0.512821	0.717949	0.982906	0.367521
0.396296	0.3	0.303704	0.200743	0.263941	0.200743	0.007407	0.211111	0.466667	0.737037	1	0.011111	0.248148	0.459259	0.733333	0.948148	0.003704	0.318519	0.533333	0.755556	0.996296	0.418519	0.111111	0.47037	0.070632	0.063197	0.003717	0.003704	0.114815	0.585185	0.840741	1	0.040741	0.422222	0.540741	0.696296	0.925926	0.107407	0.248148	0.366667	0.651852	0.992593	0.411111	0.446097	0.014815	0.418519	0.585185	0.77037	0.996296	0.266667
0.348659	0.409962	0.241379	0.292308	0.165385	0.176923	0.011494	0.245211	0.505747	0.766284	1	0.007663	0.226054	0.51341	0.770115	0.961686	0.003831	0.241379	0.409962	0.670498	0.977011	0.643678	0.291188	0.065134	0.169231	0.030769	0	0.003831	0.275862	0.505747	0.804598	1	0.015326	0.176245	0.337165	0.56705	0.992337	0.666667	0.697318	0.712644	0.770115	0.796935	0.498084	0.284615	0.049808	0.283525	0.452107	0.685824	0.984674	0.383142
0.368182	0.377273	0.254545	0.296804	0.187215	0.173516	0.031818	0.263636	0.536364	0.772727	0.981818	0.013636	0.236364	0.559091	0.818182	1	0.004545	0.209091	0.422727	0.590909	0.986364	0.463636	0.2	0.336364	0.082192	0.073059	0.009132	0.004545	0.386364	0.718182	0.881818	1	0.013636	0.168182	0.413636	0.595455	0.659091	0.031818	0.227273	0.313636	0.554545	0.854545	0.336364	0.438356	0.009091	0.181818	0.431818	0.627273	0.986364	0.440909
0.388158	0.328947	0.282895	0.178808	0.245033	0.198675	0.019737	0.328947	0.447368	0.690789	0.973684	0.065789	0.236842	0.559211	0.736842	1	0.006579	0.151316	0.5	0.789474	0.986842	0.328947	0.282895	0.388158	0.112583	0.072848	0.019868	0.006579	0.171053	0.578947	0.763158	1	0.052632	0.276316	0.638158	0.901316	0.993421	0.026316	0.296053	0.394737	0.493421	0.835526	0.401316	0.490066	0.026316	0.217105	0.539474	0.743421	0.980263	0.361842
0.335404	0.322981	0.341615	0.25625	0.21875	0.25	0.012422	0.26087	0.434783	0.745342	0.993789	0.049689	0.248447	0.52795	0.73913	1	0.006211	0.186335	0.484472	0.732919	0.956522	0.354037	0.304348	0.341615	0.13125	0.04375	0.00625	0.006211	0.136646	0.52795	0.732919	1	0.012422	0.229814	0.57764	0.826087	0.925466	0.15528	0.304348	0.391304	0.614907	0.981366	0.372671	0.4625	0.018634	0.192547	0.496894	0.689441	0.919255	0.31677
0.450867	0.236994	0.312139	0.209302	0.290698	0.174419	0.011561	0.277457	0.485549	0.83237	0.99422	0.075145	0.225434	0.531792	0.728324	0.988439	0.00578	0.202312	0.456647	0.65896	1	0.364162	0.283237	0.352601	0.122093	0.063953	0.005814	0.00578	0.138728	0.508671	0.722543	1	0.011561	0.213873	0.531792	0.751445	0.843931	0.052023	0.289017	0.375723	0.589595	0.976879	0.352601	0.44186	0.017341	0.179191	0.456647	0.65896	0.930636	0.265896
0.383117	0.266234	0.350649	0.183007	0.294118	0.183007	0.012987	0.272727	0.441558	0.714286	1	0.084416	0.233766	0.571429	0.785714	0.967532	0.006494	0.194805	0.487013	0.720779	0.961039	0.37013	0.311688	0.318182	0.130719	0.039216	0.013072	0.006494	0.142857	0.551948	0.766234	1	0.012987	0.24026	0.603896	0.863636	0.961039	0.162338	0.311688	0.38961	0.467532	0.798701	0.38961	0.48366	0.019481	0.201299	0.519481	0.720779	0.954545	0.25974
0.375723	0.323699	0.300578	0.209302	0.226744	0.186047	0.011561	0.283237	0.462428	0.716763	1	0.075145	0.242775	0.554913	0.797688	0.976879	0.00578	0.225434	0.468208	0.728324	0.99422	0.352601	0.254335	0.393064	0.098837	0.063953	0.017442	0.00578	0.190751	0.520231	0.693642	1	0.023121	0.219653	0.531792	0.774566	0.855491	0.052023	0.294798	0.393064	0.710983	0.99422	0.346821	0.418605	0.028902	0.184971	0.479769	0.705202	0.901734	0.33526
0.425676	0.256757	0.317568	0.183673	0.29932	0.129252	0.013514	0.25	0.412162	0.702703	1	0.087838	0.243243	0.547297	0.675676	0.986486	0.006757	0.202703	0.533784	0.790541	0.993243	0.391892	0.297297	0.310811	0.142857	0.061224	0.006803	0.006757	0.155405	0.5	0.736486	1	0.013514	0.243243	0.614865	0.885135	0.97973	0.060811	0.310811	0.391892	0.648649	0.824324	0.391892	0.47619	0.02027	0.202703	0.533784	0.743243	0.972973	0.304054
0.390728	0.364238	0.245033	0.253333	0.226667	0.166667	0.013245	0.225166	0.483444	0.748344	0.993377	0.02649	0.251656	0.437086	0.655629	1	0.006623	0.205298	0.523179	0.801325	0.960265	0.377483	0.291391	0.331126	0.113333	0.046667	0.006667	0.006623	0.145695	0.556291	0.748344	1	0.013245	0.238411	0.596026	0.874172	0.966887	0.165563	0.317881	0.403974	0.629139	0.81457	0.384106	0.466667	0.019868	0.198675	0.523179	0.728477	0.960265	0.390728
0.442953	0.248322	0.308725	0.202703	0.290541	0.148649	0.020134	0.322148	0.449664	0.724832	1	0.013423	0.187919	0.456376	0.657718	0.993289	0.006711	0.214765	0.536913	0.791946	0.986577	0.322148	0.302013	0.375839	0.121622	0.054054	0.013514	0.006711	0.167785	0.577181	0.765101	1	0.026846	0.261745	0.624161	0.885906	0.986577	0.060403	0.322148	0.416107	0.510067	0.832215	0.402685	0.5	0.026846	0.221477	0.536913	0.758389	0.979866	0.275168
0.369942	0.312139	0.317919	0.215116	0.255814	0.180233	0.011561	0.300578	0.50289	0.82659	1	0.040462	0.231214	0.543353	0.734104	0.99422	0.00578	0.202312	0.433526	0.66474	0.965318	0.34104	0.265896	0.393064	0.110465	0.063953	0.005814	0.00578	0.127168	0.491329	0.682081	1	0.011561	0.208092	0.526012	0.751445	0.83815	0.144509	0.306358	0.404624	0.861272	0.988439	0.358382	0.453488	0.017341	0.179191	0.479769	0.67052	0.965318	0.34104
0.422819	0.288591	0.288591	0.209459	0.27027	0.182432	0.013423	0.255034	0.442953	0.744966	1	0.087248	0.261745	0.516779	0.711409	0.959732	0.006711	0.194631	0.530201	0.731544	0.966443	0.362416	0.302013	0.33557	0.128378	0.047297	0.006757	0.006711	0.14094	0.557047	0.744966	1	0.013423	0.241611	0.604027	0.872483	0.973154	0.167785	0.322148	0.409396	0.637584	0.818792	0.395973	0.486486	0.020134	0.201342	0.516779	0.731544	0.966443	0.302013
0.408163	0.251701	0.340136	0.239726	0.287671	0.157534	0.013605	0.285714	0.47619	0.707483	1	0.068027	0.176871	0.469388	0.721088	0.993197	0.006803	0.204082	0.517007	0.768707	0.972789	0.367347	0.29932	0.333333	0.109589	0.068493	0.013699	0.006803	0.14966	0.510204	0.741497	1	0.013605	0.244898	0.619048	0.891156	0.986395	0.061224	0.326531	0.408163	0.489796	0.816327	0.380952	0.452055	0.020408	0.204082	0.537415	0.727891	0.972789	0.278912
0.406667	0.246667	0.346667	0.174497	0.261745	0.187919	0.013333	0.28	0.446667	0.7	1	0.066667	0.253333	0.52	0.813333	0.993333	0.006667	0.193333	0.48	0.753333	0.946667	0.36	0.306667	0.333333	0.127517	0.04698	0.006711	0.006667	0.16	0.573333	0.78	1	0.013333	0.24	0.6	0.853333	0.953333	0.053333	0.3	0.386667	0.466667	0.686667	0.373333	0.456376	0.02	0.2	0.526667	0.706667	0.946667	0.253333
0.42069	0.255172	0.324138	0.180556	0.298611	0.138889	0.013793	0.282759	0.427586	0.675862	1	0.062069	0.172414	0.606897	0.8	0.97931	0.006897	0.206897	0.510345	0.731034	0.972414	0.351724	0.282759	0.365517	0.118056	0.0625	0.006944	0.006897	0.144828	0.558621	0.744828	1	0.013793	0.193103	0.6	0.882759	0.97931	0.165517	0.331034	0.42069	0.648276	0.82069	0.37931	0.444444	0.02069	0.193103	0.510345	0.724138	0.972414	0.282759
0.296053	0.388158	0.315789	0.205298	0.198675	0.258278	0.013158	0.289474	0.401316	0.690789	1	0.039474	0.236842	0.519737	0.717105	0.993421	0.006579	0.203947	0.539474	0.815789	0.980263	0.348684	0.322368	0.328947	0.13245	0.039735	0.013245	0.006579	0.138158	0.506579	0.743421	1	0.013158	0.243421	0.618421	0.881579	0.986842	0.164474	0.315789	0.401316	0.480263	0.815789	0.394737	0.490066	0.019737	0.203947	0.519737	0.736842	0.973684	0.407895
0.477124	0.202614	0.320261	0.171053	0.348684	0.171053	0.013072	0.267974	0.477124	0.732026	1	0.065359	0.189542	0.398693	0.594771	0.901961	0.006536	0.235294	0.575163	0.784314	0.980392	0.339869	0.300654	0.359477	0.125	0.072368	0.006579	0.006536	0.143791	0.54902	0.75817	1	0.013072	0.235294	0.588235	0.856209	0.954248	0.058824	0.313725	0.405229	0.627451	0.973856	0.392157	0.486842	0.019608	0.202614	0.51634	0.745098	0.980392	0.228758
0.388158	0.302632	0.309211	0.225166	0.284768	0.211921	0.013158	0.269737	0.447368	0.717105	1	0.039474	0.217105	0.519737	0.710526	0.967105	0.006579	0.223684	0.513158	0.789474	0.986842	0.375	0.296053	0.328947	0.119205	0.05298	0.013245	0.006579	0.197368	0.559211	0.743421	1	0.013158	0.184211	0.631579	0.881579	0.980263	0.157895	0.296053	0.381579	0.460526	0.809211	0.401316	0.503311	0.019737	0.197368	0.513158	0.723684	0.986842	0.263158
0.3125	0.375	0.3125	0.264151	0.201258	0.220126	0.0375	0.21875	0.41875	0.675	0.95625	0.05	0.28125	0.525	0.775	1	0.00625	0.1875	0.5	0.725	0.975	0.35625	0.29375	0.35	0.125786	0.062893	0.012579	0.00625	0.14375	0.5375	0.7375	1	0.0125	0.225	0.56875	0.8125	0.90625	0.05625	0.30625	0.39375	0.6125	0.95	0.375	0.465409	0.01875	0.19375	0.49375	0.7125	0.98125	0.375
0.434211	0.25	0.315789	0.205298	0.304636	0.165563	0.013158	0.276316	0.460526	0.684211	1	0.085526	0.256579	0.552632	0.769737	0.986842	0.006579	0.164474	0.539474	0.796053	0.993421	0.355263	0.315789	0.328947	0.13245	0.05298	0.013245	0.006579	0.144737	0.552632	0.763158	1	0.013158	0.243421	0.605263	0.868421	0.967105	0.059211	0.309211	0.394737	0.473684	0.802632	0.375	0.450331	0.019737	0.197368	0.506579	0.723684	0.953947	0.263158
0.322034	0.40113	0.276836	0.244318	0.210227	0.227273	0.016949	0.231638	0.451977	0.655367	0.977401	0.011299	0.248588	0.548023	0.779661	1	0.00565	0.214689	0.457627	0.762712	0.943503	0.40678	0.259887	0.333333	0.096591	0.0625	0.017045	0.00565	0.169492	0.519774	0.762712	1	0.112994	0.276836	0.615819	0.841808	0.926554	0.045198	0.355932	0.440678	0.649718	0.949153	0.40113	0.477273	0.028249	0.248588	0.497175	0.723164	0.949153	0.355932
0.404624	0.289017	0.306358	0.244186	0.255814	0.180233	0.011561	0.260116	0.433526	0.705202	0.988439	0.046243	0.231214	0.624277	0.803468	1	0.00578	0.179191	0.445087	0.67052	0.976879	0.369942	0.265896	0.364162	0.104651	0.05814	0.011628	0.00578	0.138728	0.508671	0.722543	1	0.011561	0.208092	0.526012	0.757225	0.843931	0.144509	0.294798	0.387283	0.606936	0.988439	0.364162	0.465116	0.017341	0.179191	0.456647	0.676301	0.976879	0.289017
0.460526	0.263158	0.276316	0.238411	0.298013	0.15894	0.013158	0.25	0.480263	0.703947	1	0.072368	0.263158	0.539474	0.717105	0.993421	0.006579	0.190789	0.532895	0.782895	0.967105	0.348684	0.309211	0.342105	0.125828	0.059603	0.006623	0.006579	0.144737	0.559211	0.75	1	0.013158	0.236842	0.605263	0.875	0.973684	0.059211	0.315789	0.401316	0.638158	0.822368	0.401316	0.476821	0.019737	0.203947	0.513158	0.723684	0.967105	0.25
0.326797	0.385621	0.287582	0.263158	0.243421	0.210526	0.019608	0.27451	0.490196	0.75817	1	0.013072	0.267974	0.48366	0.712418	0.993464	0.006536	0.143791	0.509804	0.797386	0.980392	0.346405	0.313725	0.339869	0.125	0.059211	0.006579	0.006536	0.150327	0.503268	0.75817	1	0.019608	0.248366	0.614379	0.888889	0.986928	0.058824	0.320261	0.405229	0.653595	0.836601	0.405229	0.486842	0.013072	0.202614	0.522876	0.738562	0.980392	0.392157
0.4	0.248276	0.351724	0.180556	0.215278	0.208333	0.013793	0.234483	0.475862	0.682759	1	0.068966	0.262069	0.572414	0.806897	0.986207	0.006897	0.206897	0.496552	0.772414	0.97931	0.337931	0.337931	0.324138	0.131944	0.034722	0.006944	0.006897	0.117241	0.510345	0.737931	1	0.013793	0.255172	0.627586	0.875862	0.986207	0.172414	0.324138	0.406897	0.489655	0.710345	0.4	0.486111	0.02069	0.206897	0.544828	0.744828	0.97931	0.255172
0.419355	0.301075	0.27957	0.286486	0.227027	0.156757	0.032258	0.263441	0.55914	0.833333	1	0.05914	0.27957	0.510753	0.758065	0.983871	0.005376	0.16129	0.413978	0.645161	0.935484	0.413978	0.247312	0.33871	0.097297	0.064865	0.010811	0.005376	0.182796	0.575269	0.854839	1	0.010753	0.193548	0.494624	0.698925	0.77957	0.048387	0.268817	0.354839	0.645161	0.919355	0.33871	0.432432	0.016129	0.166667	0.446237	0.645161	0.951613	0.295699
0.313433	0.343284	0.343284	0.207265	0.230769	0.232906	0.004264	0.277186	0.528785	0.771855	1	0.014925	0.204691	0.462687	0.71855	0.997868	0.002132	0.245203	0.492537	0.739872	0.98081	0.439232	0.179104	0.381663	0.066239	0.074786	0.010684	0.002132	0.19403	0.428571	0.641791	1	0.040512	0.206823	0.351812	0.47548	0.73774	0.004264	0.307036	0.720682	0.861407	0.968017	0.573561	0.384615	0.006397	0.206823	0.441365	0.692964	0.98081	0.356077
0.42236	0.282609	0.295031	0.242991	0.208723	0.161994	0.015528	0.167702	0.385093	0.717391	1	0.006211	0.279503	0.509317	0.751553	0.990683	0.003106	0.357143	0.568323	0.776398	0.996894	0.335404	0.114907	0.549689	0.05919	0.05296	0.003115	0.003106	0.462733	0.686335	0.854037	1	0.416149	0.459627	0.664596	0.763975	0.937888	0.052795	0.186335	0.322981	0.571429	0.993789	0.381988	0.386293	0.037267	0.431677	0.57764	0.757764	0.996894	0.304348
0.424125	0.202335	0.373541	0.175781	0.304688	0.152344	0.015564	0.249027	0.529183	0.758755	1	0.007782	0.159533	0.44358	0.642023	0.941634	0.003891	0.264591	0.501946	0.77821	0.980545	0.463035	0.307393	0.229572	0.125	0.054688	0	0.003891	0.284047	0.509728	0.747082	1	0.11284	0.229572	0.451362	0.715953	0.902724	0.007782	0.077821	0.494163	0.77821	0.953307	0.486381	0.40625	0.019455	0.303502	0.486381	0.743191	0.961089	0.217899
0.377301	0.325153	0.297546	0.230769	0.24	0.193846	0.006135	0.193252	0.466258	0.708589	1	0.039877	0.349693	0.576687	0.779141	0.996933	0.003067	0.236196	0.444785	0.693252	0.978528	0.53681	0.263804	0.199387	0.104615	0.055385	0.012308	0.003067	0.251534	0.466258	0.754601	1	0.042945	0.312883	0.555215	0.702454	0.935583	0.067485	0.138037	0.503067	0.846626	0.98773	0.503067	0.356923	0.042945	0.343558	0.527607	0.757669	0.978528	0.315951
0.35082	0.321311	0.327869	0.226974	0.246711	0.213816	0.013115	0.209836	0.459016	0.721311	0.996721	0.022951	0.288525	0.508197	0.708197	0.980328	0.003279	0.242623	0.514754	0.780328	1	0.52459	0.285246	0.190164	0.111842	0.039474	0.013158	0.003279	0.245902	0.465574	0.767213	1	0.006557	0.304918	0.563934	0.72459	0.954098	0.039344	0.098361	0.501639	0.806557	0.996721	0.537705	0.388158	0.009836	0.337705	0.511475	0.770492	0.990164	0.318033
0.328877	0.377005	0.294118	0.241287	0.184987	0.252011	0.005348	0.221925	0.508021	0.778075	1	0.010695	0.259358	0.513369	0.737968	0.991979	0.002674	0.262032	0.462567	0.695187	0.994652	0.524064	0.259358	0.216578	0.096515	0.053619	0.010724	0.002674	0.221925	0.435829	0.729947	1	0.072193	0.307487	0.526738	0.663102	0.997326	0.093583	0.165775	0.483957	0.874332	0.938503	0.497326	0.380697	0.010695	0.315508	0.513369	0.705882	0.994652	0.398396
0.389655	0.310345	0.3	0.269896	0.217993	0.17301	0.013793	0.227586	0.489655	0.768966	1	0.010345	0.258621	0.531034	0.827586	0.996552	0.003448	0.237931	0.475862	0.665517	0.965517	0.503448	0.251724	0.244828	0.117647	0.062284	0	0.003448	0.265517	0.534483	0.831034	1	0.113793	0.237931	0.396552	0.610345	0.768966	0.02069	0.093103	0.524138	0.796552	0.92069	0.444828	0.373702	0.031034	0.265517	0.424138	0.634483	0.982759	0.355172
0.294872	0.394872	0.310256	0.254499	0.161954	0.290488	0.015385	0.241026	0.515385	0.751282	0.984615	0.005128	0.230769	0.461538	0.717949	0.992308	0.002564	0.274359	0.525641	0.748718	1	0.458974	0.079487	0.461538	0.046272	0.097686	0	0.002564	0.215385	0.45641	0.746154	1	0.153846	0.528205	0.825641	0.869231	0.997436	0.007692	0.264103	0.476923	0.710256	0.951282	0.466667	0.421594	0.007692	0.3	0.541026	0.753846	0.994872	0.369231
0.341121	0.327103	0.331776	0.211268	0.234742	0.248826	0.023364	0.28972	0.485981	0.799065	1	0.009346	0.228972	0.514019	0.733645	0.957944	0.004673	0.182243	0.481308	0.719626	0.995327	0.397196	0.364486	0.238318	0.140845	0.028169	0	0.004673	0.28972	0.602804	0.878505	1	0.11215	0.242991	0.406542	0.668224	0.939252	0.014019	0.065421	0.471963	0.53271	0.869159	0.481308	0.450704	0.014019	0.200935	0.495327	0.672897	0.962617	0.32243
0.385185	0.348148	0.266667	0.260223	0.185874	0.189591	0.018519	0.307407	0.488889	0.803704	0.988889	0.007407	0.181481	0.448148	0.711111	1	0.003704	0.207407	0.540741	0.718519	0.996296	0.611111	0.277778	0.111111	0.115242	0.048327	0.003717	0.003704	0.244444	0.444444	0.77037	1	0.062963	0.522222	0.644444	0.751852	0.896296	0.014815	0.037037	0.377778	0.433333	0.992593	0.366667	0.356877	0.014815	0.162963	0.42963	0.674074	0.9	0.366667
0.347705	0.40751	0.244784	0.256267	0.17688	0.175487	0.004172	0.260083	0.50765	0.752434	1	0.009736	0.223922	0.454798	0.767733	0.995828	0.001391	0.328234	0.563282	0.741307	0.998609	0.606398	0.130737	0.262865	0.05571	0.058496	0.005571	0.001391	0.178025	0.333797	0.706537	1	0.005563	0.452017	0.646732	0.776078	0.88178	0.006954	0.461752	0.582754	0.763561	0.927677	0.496523	0.356546	0.005563	0.32128	0.538248	0.74548	0.998609	0.435327
0.393939	0.338384	0.267677	0.263959	0.203046	0.187817	0.010101	0.227273	0.520202	0.80303	0.994949	0.030303	0.237374	0.464646	0.727273	1	0.005051	0.252525	0.479798	0.636364	0.989899	0.5	0.141414	0.358586	0.071066	0.071066	0	0.005051	0.358586	0.540404	0.707071	1	0.333333	0.388889	0.530303	0.621212	0.742424	0.015152	0.09596	0.227273	0.858586	0.984848	0.373737	0.365482	0.030303	0.20202	0.373737	0.616162	0.984848	0.338384
0.365722	0.336032	0.298246	0.233784	0.225676	0.17973	0.002699	0.238866	0.503374	0.751687	0.982456	0.004049	0.242915	0.502024	0.761134	0.99865	0.00135	0.252362	0.487179	0.724696	1	0.489879	0.048583	0.461538	0.022973	0.117568	0.004054	0.00135	0.240216	0.502024	0.767881	1	0.072874	0.564103	0.585695	0.677463	0.817814	0.005398	0.236167	0.460189	0.754386	0.964912	0.561404	0.408108	0.004049	0.272605	0.487179	0.708502	0.995951	0.357625
0.354118	0.335294	0.310588	0.244994	0.208481	0.207303	0.005882	0.277647	0.550588	0.762353	1	0.007059	0.214118	0.46	0.712941	0.998824	0.001176	0.263529	0.489412	0.754118	0.997647	0.418824	0.150588	0.430588	0.058893	0.08245	0.009423	0.001176	0.211765	0.511765	0.730588	1	0.002353	0.169412	0.365882	0.578824	0.985882	0.021176	0.329412	0.56	0.814118	0.997647	0.503529	0.414605	0.003529	0.229412	0.465882	0.695294	0.997647	0.335294
0.391892	0.314189	0.293919	0.216949	0.250847	0.162712	0.006757	0.280405	0.469595	0.783784	0.986486	0.016892	0.209459	0.439189	0.685811	0.996622	0.003378	0.222973	0.557432	0.756757	1	0.5	0.125	0.375	0.054237	0.067797	0	0.003378	0.202703	0.415541	0.641892	1	0.064189	0.162162	0.219595	0.310811	0.574324	0.10473	0.587838	0.692568	0.861486	0.97973	0.452703	0.40678	0.016892	0.256757	0.547297	0.722973	0.989865	0.35473
0.330544	0.401674	0.267782	0.268908	0.205882	0.193277	0.012552	0.225941	0.506276	0.769874	1	0.008368	0.242678	0.543933	0.757322	0.995816	0.004184	0.251046	0.430962	0.623431	0.970711	0.322176	0.09205	0.585774	0.042017	0.109244	0	0.004184	0.175732	0.472803	0.790795	1	0.435146	0.76569	0.824268	0.853556	0.979079	0.029289	0.242678	0.447699	0.610879	0.953975	0.485356	0.352941	0.050209	0.242678	0.439331	0.65272	0.970711	0.426778
0.394737	0.328947	0.276316	0.246696	0.202643	0.180617	0.013158	0.236842	0.464912	0.723684	0.986842	0.008772	0.25	0.513158	0.785088	1	0.004386	0.201754	0.473684	0.666667	0.995614	0.324561	0.118421	0.557018	0.044053	0.096916	0	0.004386	0.135965	0.539474	0.745614	1	0.013158	0.399123	0.780702	0.842105	0.881579	0.04386	0.267544	0.460526	0.618421	0.97807	0.504386	0.334802	0.008772	0.20614	0.469298	0.671053	0.991228	0.320175
0.40724	0.276018	0.316742	0.245455	0.240909	0.154545	0.00905	0.280543	0.579186	0.773756	1	0.054299	0.20362	0.502262	0.760181	0.995475	0.004525	0.226244	0.420814	0.633484	0.9819	0.316742	0.095023	0.588235	0.040909	0.086364	0.004545	0.004525	0.153846	0.447964	0.755656	1	0.117647	0.773756	0.828054	0.850679	0.886878	0.0181	0.235294	0.470588	0.633484	0.986425	0.502262	0.363636	0.0181	0.21267	0.434389	0.628959	0.9819	0.244344
0.372624	0.334601	0.292776	0.221374	0.179389	0.229008	0.019011	0.190114	0.467681	0.768061	1	0.007605	0.231939	0.513308	0.73384	0.980989	0.003802	0.296578	0.494297	0.703422	0.977186	0.311787	0.102662	0.585551	0.030534	0.099237	0	0.003802	0.087452	0.277567	0.703422	1	0.498099	0.806084	0.847909	0.882129	0.908745	0.019011	0.30038	0.48289	0.661597	0.984791	0.467681	0.312977	0.04943	0.30038	0.479087	0.665399	0.977186	0.30038
0.372007	0.3407	0.287293	0.236866	0.213825	0.2	0.002762	0.210866	0.462247	0.744936	1	0.001842	0.237569	0.48895	0.731123	0.999079	0.000921	0.334254	0.550645	0.775322	0.994475	0.441989	0.093002	0.465009	0.042396	0.086636	0.001843	0.000921	0.190608	0.394107	0.672192	1	0.005525	0.289134	0.384899	0.569061	0.95488	0.004604	0.361878	0.609576	0.78453	0.996317	0.476059	0.337327	0.005525	0.330571	0.541436	0.757827	0.994475	0.344383
0.308017	0.379747	0.312236	0.254237	0.152542	0.245763	0.008439	0.202532	0.510549	0.767932	0.995781	0.050633	0.291139	0.506329	0.763713	0.987342	0.004219	0.232068	0.42616	0.662447	1	0.341772	0.092827	0.565401	0.042373	0.110169	0	0.004219	0.156118	0.438819	0.78481	1	0.43038	0.763713	0.818565	0.839662	0.987342	0.021097	0.253165	0.455696	0.611814	0.957806	0.493671	0.338983	0.029536	0.236287	0.438819	0.675105	0.991561	0.371308
0.328063	0.355731	0.316206	0.238095	0.202381	0.230159	0.01581	0.252964	0.466403	0.750988	1	0.011858	0.245059	0.549407	0.794466	0.988142	0.003953	0.217391	0.462451	0.699605	0.992095	0.312253	0.083004	0.604743	0.035714	0.115079	0.003968	0.003953	0.150198	0.462451	0.782609	1	0.201581	0.806324	0.857708	0.87747	0.909091	0.011858	0.27668	0.454545	0.648221	0.992095	0.529644	0.365079	0.007905	0.256917	0.438735	0.656126	0.992095	0.383399
0.393162	0.290598	0.316239	0.266094	0.206009	0.214592	0.008547	0.183761	0.508547	0.769231	0.991453	0.038462	0.290598	0.491453	0.75641	0.995726	0.004274	0.239316	0.495726	0.705128	1	0.299145	0.102564	0.598291	0.038627	0.11588	0.004292	0.004274	0.149573	0.423077	0.75641	1	0.111111	0.773504	0.816239	0.84188	0.876068	0.017094	0.25641	0.474359	0.632479	0.982906	0.504274	0.351931	0.017094	0.222222	0.42735	0.632479	0.965812	0.269231
0.358333	0.354167	0.2875	0.284519	0.179916	0.225941	0.0125	0.208333	0.4625	0.791667	1	0.008333	0.325	0.5625	0.779167	0.991667	0.004167	0.216667	0.3875	0.625	0.9625	0.275	0.116667	0.608333	0.037657	0.121339	0.004184	0.004167	0.141667	0.391667	0.725	1	0.133333	0.758333	0.804167	0.841667	0.870833	0.029167	0.254167	0.479167	0.633333	0.983333	0.483333	0.343096	0.020833	0.220833	0.420833	0.620833	0.945833	0.3125
0.347162	0.381368	0.27147	0.248361	0.182083	0.207575	0.002183	0.269287	0.502911	0.75837	1	0.002911	0.161572	0.413392	0.713246	0.996361	0.000728	0.385735	0.565502	0.77802	0.998544	0.518923	0.077147	0.40393	0.032775	0.085215	0.003642	0.000728	0.135371	0.342795	0.614265	1	0.03639	0.417031	0.458515	0.611354	0.954876	0.026929	0.47671	0.666667	0.835517	0.998544	0.45706	0.355426	0.004367	0.377729	0.55968	0.756186	0.998544	0.372635
0.40081	0.323887	0.275304	0.284553	0.203252	0.182927	0.016194	0.230769	0.51417	0.753036	0.995951	0.008097	0.283401	0.510121	0.789474	1	0.004049	0.246964	0.449393	0.651822	0.983806	0.291498	0.109312	0.59919	0.03252	0.105691	0	0.004049	0.182186	0.34413	0.708502	1	0.469636	0.801619	0.846154	0.882591	0.910931	0.032389	0.275304	0.481781	0.647773	0.979757	0.493927	0.357724	0.032389	0.271255	0.469636	0.668016	0.983806	0.287449
0.402597	0.320346	0.277056	0.273913	0.230435	0.182609	0.008658	0.199134	0.47619	0.722944	0.995671	0.030303	0.285714	0.575758	0.796537	1	0.004329	0.255411	0.428571	0.636364	0.991342	0.354978	0.095238	0.549784	0.034783	0.086957	0	0.004329	0.181818	0.471861	0.714286	1	0.450216	0.792208	0.844156	0.865801	0.900433	0.030303	0.246753	0.419913	0.658009	0.991342	0.506494	0.365217	0.034632	0.251082	0.454545	0.65368	0.991342	0.320346
0.330579	0.342975	0.326446	0.257261	0.19917	0.219917	0.016529	0.231405	0.520661	0.768595	0.991736	0.012397	0.293388	0.508264	0.780992	1	0.004132	0.18595	0.438017	0.677686	0.995868	0.326446	0.090909	0.582645	0.037344	0.095436	0.004149	0.004132	0.173554	0.392562	0.772727	1	0.165289	0.793388	0.847107	0.867769	0.900826	0.049587	0.280992	0.483471	0.644628	0.983471	0.512397	0.373444	0.008264	0.247934	0.438017	0.64876	0.987603	0.326446
0.304348	0.431159	0.264493	0.28	0.149091	0.254545	0.007246	0.32971	0.57971	0.793478	0.996377	0.01087	0.213768	0.481884	0.75	1	0.003623	0.206522	0.438406	0.648551	0.952899	0.398551	0.076087	0.525362	0.029091	0.109091	0	0.003623	0.148551	0.442029	0.782609	1	0.463768	0.757246	0.800725	0.818841	0.847826	0.014493	0.297101	0.478261	0.623188	0.981884	0.452899	0.32	0.014493	0.268116	0.427536	0.615942	0.974638	0.423913
0.342105	0.37218	0.285714	0.25283	0.2	0.188679	0.007519	0.240602	0.507519	0.781955	0.988722	0.011278	0.225564	0.496241	0.759398	1	0.003759	0.278195	0.469925	0.661654	0.966165	0.413534	0.078947	0.507519	0.030189	0.090566	0	0.003759	0.109023	0.451128	0.75188	1	0.473684	0.774436	0.819549	0.838346	0.868421	0.052632	0.296992	0.458647	0.642857	0.954887	0.466165	0.34717	0.030075	0.278195	0.466165	0.650376	0.947368	0.424812
0.356828	0.330396	0.312775	0.256637	0.212389	0.212389	0.008811	0.202643	0.488987	0.726872	0.991189	0.013216	0.255507	0.54185	0.770925	0.977974	0.004405	0.246696	0.440529	0.678414	1	0.30837	0.101322	0.590308	0.035398	0.115044	0	0.004405	0.14978	0.431718	0.757709	1	0.440529	0.788546	0.845815	0.881057	0.907489	0.017621	0.255507	0.46696	0.629956	0.982379	0.502203	0.353982	0.017621	0.22467	0.431718	0.625551	0.986784	0.295154
0.366935	0.322581	0.310484	0.271255	0.218623	0.190283	0.008065	0.221774	0.491935	0.741935	1	0.032258	0.254032	0.532258	0.822581	0.987903	0.004032	0.245968	0.439516	0.657258	0.991935	0.330645	0.084677	0.584677	0.032389	0.11336	0	0.004032	0.169355	0.447581	0.778226	1	0.439516	0.766129	0.826613	0.846774	0.879032	0.040323	0.258065	0.459677	0.620968	0.983871	0.495968	0.364372	0.016129	0.245968	0.447581	0.685484	0.987903	0.278226
0.307359	0.385281	0.307359	0.234783	0.213043	0.226087	0.008658	0.268398	0.493506	0.722944	1	0.012987	0.21645	0.47619	0.800866	0.987013	0.004329	0.229437	0.489177	0.69697	0.995671	0.337662	0.095238	0.5671	0.034783	0.104348	0	0.004329	0.116883	0.406926	0.692641	1	0.398268	0.78355	0.835498	0.857143	0.891775	0.051948	0.272727	0.467532	0.614719	0.978355	0.493506	0.330435	0.025974	0.21645	0.47619	0.688312	0.991342	0.385281
0.295082	0.472131	0.232787	0.223684	0.190789	0.180921	0.013115	0.2	0.367213	0.580328	0.993443	0.006557	0.390164	0.652459	0.829508	1	0.003279	0.134426	0.380328	0.645902	0.996721	0.691803	0.098361	0.209836	0.039474	0.072368	0	0.003279	0.321311	0.514754	0.740984	1	0.013115	0.101639	0.134426	0.213115	0.354098	0.052459	0.163934	0.609836	0.84918	0.95082	0.468852	0.440789	0.009836	0.285246	0.531148	0.72459	0.937705	0.47541
0.473896	0.228916	0.297189	0.205645	0.290323	0.133065	0.016064	0.24498	0.48996	0.751004	1	0.036145	0.240964	0.554217	0.767068	0.97992	0.004016	0.220884	0.433735	0.698795	0.987952	0.48996	0.236948	0.273092	0.092742	0.068548	0.004032	0.004016	0.168675	0.522088	0.751004	1	0.076305	0.273092	0.441767	0.702811	0.915663	0.008032	0.349398	0.48996	0.803213	0.951807	0.341365	0.33871	0.008032	0.248996	0.570281	0.759036	0.987952	0.261044
0.436314	0.319783	0.243902	0.293478	0.230978	0.163043	0.00542	0.200542	0.436314	0.728997	1	0.00813	0.298103	0.558266	0.783198	0.98374	0.00271	0.303523	0.498645	0.726287	0.99729	0.601626	0.230352	0.168022	0.086957	0.048913	0	0.00271	0.230352	0.547425	0.826558	1	0.094851	0.360434	0.452575	0.696477	0.99458	0.01084	0.075881	0.479675	0.674797	0.95935	0.330623	0.353261	0.01084	0.346883	0.506775	0.745257	0.99729	0.365854
0.41339	0.331562	0.255048	0.253191	0.21383	0.161702	0.002125	0.255048	0.518597	0.760893	1	0.003188	0.217853	0.520723	0.749203	0.98831	0.001063	0.274176	0.463337	0.662062	0.997875	0.472901	0.077577	0.449522	0.034043	0.085106	0.008511	0.001063	0.157279	0.642933	0.77577	1	0.035069	0.223167	0.409139	0.81509	0.954304	0.003188	0.277365	0.461211	0.603613	0.996812	0.416578	0.33617	0.007439	0.274176	0.463337	0.636557	0.996812	0.35813
0.358779	0.305344	0.335878	0.223077	0.238462	0.246154	0.076336	0.335878	0.519084	0.778626	0.938931	0.022901	0.19084	0.412214	0.755725	1	0.007634	0.21374	0.442748	0.687023	0.992366	0.458015	0.137405	0.40458	0.046154	0.092308	0	0.007634	0.19084	0.351145	0.748092	1	0.259542	0.282443	0.381679	0.412214	0.694656	0.076336	0.465649	0.564885	0.78626	0.89313	0.419847	0.323077	0.053435	0.29771	0.503817	0.679389	0.954198	0.274809
0.369748	0.302521	0.327731	0.211864	0.254237	0.177966	0.033613	0.252101	0.529412	0.689076	1	0.016807	0.201681	0.403361	0.705882	0.966387	0.008403	0.277311	0.554622	0.789916	0.983193	0.352941	0.151261	0.495798	0.042373	0.076271	0.008475	0.008403	0.084034	0.285714	0.420168	1	0.310924	0.336134	0.453782	0.756303	0.798319	0.109244	0.487395	0.613445	0.848739	0.983193	0.462185	0.355932	0.058824	0.361345	0.579832	0.764706	0.983193	0.294118
0.336134	0.386555	0.277311	0.20339	0.152542	0.245763	0.016807	0.159664	0.378151	0.638655	0.991597	0.05042	0.302521	0.605042	0.798319	1	0.008403	0.218487	0.462185	0.697479	0.97479	0.403361	0.168067	0.428571	0.067797	0.067797	0	0.008403	0.176471	0.336134	0.689076	1	0.033613	0.226891	0.394958	0.436975	0.747899	0.067227	0.487395	0.596639	0.87395	0.983193	0.453782	0.355932	0.033613	0.386555	0.537815	0.731092	0.97479	0.403361
0.300813	0.439024	0.260163	0.286885	0.147541	0.254098	0.02439	0.235772	0.544715	0.715447	1	0.01626	0.195122	0.430894	0.772358	0.99187	0.00813	0.268293	0.487805	0.739837	0.98374	0.373984	0.138211	0.487805	0.04918	0.081967	0	0.00813	0.195122	0.341463	0.691057	1	0.260163	0.284553	0.422764	0.455285	0.764228	0.065041	0.479675	0.601626	0.869919	0.99187	0.471545	0.377049	0.04878	0.292683	0.495935	0.731707	0.98374	0.447154
0.361345	0.243697	0.394958	0.186441	0.313559	0.220339	0.016807	0.159664	0.453782	0.613445	1	0.058824	0.327731	0.470588	0.789916	0.991597	0.008403	0.243697	0.521008	0.731092	0.966387	0.319328	0.394958	0.285714	0.118644	0.050847	0.016949	0.008403	0.159664	0.327731	0.764706	1	0.05042	0.193277	0.352941	0.714286	0.932773	0.462185	0.521008	0.596639	0.815126	0.89916	0.588235	0.372881	0.05042	0.285714	0.579832	0.764706	0.966387	0.218487
0.446809	0.333333	0.219858	0.307143	0.157143	0.164286	0.014184	0.184397	0.475177	0.758865	1	0.021277	0.319149	0.588652	0.801418	0.992908	0.007092	0.134752	0.404255	0.659574	0.978723	0.48227	0.134752	0.382979	0.042857	0.1	0	0.007092	0.269504	0.439716	0.851064	1	0.205674	0.22695	0.375887	0.411348	0.680851	0.028369	0.134752	0.539007	0.765957	0.879433	0.404255	0.285714	0.06383	0.361702	0.489362	0.666667	0.964539	0.347518
0.365217	0.243478	0.391304	0.175439	0.289474	0.175439	0.026087	0.234783	0.504348	0.695652	1	0.034783	0.217391	0.426087	0.686957	0.991304	0.008696	0.278261	0.565217	0.756522	0.956522	0.417391	0.156522	0.426087	0.052632	0.087719	0	0.008696	0.2	0.356522	0.721739	1	0.286957	0.313043	0.426087	0.46087	0.782609	0.078261	0.478261	0.6	0.869565	0.982609	0.46087	0.368421	0.052174	0.321739	0.556522	0.747826	0.982609	0.217391
0.368421	0.245614	0.385965	0.132743	0.318584	0.185841	0.026316	0.201754	0.5	0.649123	1	0.04386	0.298246	0.508772	0.807018	0.991228	0.008772	0.245614	0.447368	0.754386	0.95614	0.385965	0.166667	0.447368	0.053097	0.106195	0	0.008772	0.114035	0.350877	0.710526	1	0.280702	0.307018	0.412281	0.45614	0.780702	0.078947	0.473684	0.605263	0.868421	0.982456	0.45614	0.353982	0.052632	0.333333	0.561404	0.754386	0.982456	0.201754
0.330882	0.404412	0.264706	0.251852	0.185185	0.177778	0.014706	0.286765	0.514706	0.705882	1	0.022059	0.235294	0.448529	0.757353	0.992647	0.007353	0.205882	0.470588	0.654412	0.919118	0.316176	0.139706	0.544118	0.044444	0.074074	0	0.007353	0.110294	0.301471	0.617647	1	0.242647	0.264706	0.352941	0.632353	0.669118	0.044118	0.419118	0.558824	0.801471	0.941176	0.404412	0.340741	0.051471	0.338235	0.507353	0.683824	0.919118	0.419118
0.398148	0.25	0.351852	0.186916	0.271028	0.242991	0.018519	0.203704	0.518519	0.768519	1	0.074074	0.185185	0.407407	0.657407	0.925926	0.009259	0.259259	0.490741	0.740741	0.990741	0.361111	0.194444	0.444444	0.074766	0.056075	0	0.009259	0.175926	0.324074	0.777778	1	0.055556	0.268519	0.37037	0.416667	0.759259	0.101852	0.462963	0.574074	0.842593	0.953704	0.481481	0.373832	0.064815	0.305556	0.5	0.722222	0.962963	0.231481
0.328859	0.42953	0.241611	0.256757	0.162162	0.182432	0.020134	0.255034	0.436242	0.691275	0.966443	0.013423	0.302013	0.57047	0.825503	1	0.006711	0.221477	0.469799	0.697987	0.986577	0.463087	0.154362	0.38255	0.054054	0.067568	0	0.006711	0.281879	0.57047	0.879195	1	0.221477	0.248322	0.342282	0.604027	0.85906	0.040268	0.134228	0.463087	0.704698	0.805369	0.389262	0.243243	0.026846	0.255034	0.442953	0.604027	0.845638	0.469799
0.357143	0.337662	0.305195	0.313725	0.189542	0.20915	0.051948	0.318182	0.545455	0.818182	1	0.012987	0.175325	0.376623	0.694805	0.974026	0.006494	0.266234	0.454545	0.720779	0.993506	0.448052	0.097403	0.454545	0.039216	0.091503	0	0.006494	0.116883	0.324675	0.681818	1	0.123377	0.266234	0.292208	0.396104	0.422078	0.051948	0.5	0.623377	0.766234	0.915584	0.454545	0.352941	0.032468	0.285714	0.474026	0.720779	0.935065	0.331169
0.432	0.256	0.312	0.225806	0.233871	0.177419	0.048	0.272	0.52	0.776	1	0.032	0.232	0.448	0.712	0.984	0.008	0.216	0.48	0.704	0.968	0.432	0.168	0.4	0.056452	0.072581	0.008065	0.008	0.192	0.36	0.76	1	0.2	0.232	0.384	0.68	0.976	0.024	0.424	0.536	0.784	0.888	0.464	0.354839	0.016	0.352	0.504	0.696	0.968	0.248
0.413223	0.280992	0.305785	0.175	0.258333	0.175	0.016529	0.305785	0.520661	0.77686	0.966942	0.033058	0.181818	0.38843	0.743802	0.991736	0.008264	0.231405	0.495868	0.702479	1	0.404959	0.157025	0.438017	0.05	0.1	0	0.008264	0.181818	0.338843	0.735537	1	0.256198	0.280992	0.380165	0.421488	0.727273	0.07438	0.471074	0.578512	0.826446	0.942149	0.454545	0.35	0.041322	0.305785	0.512397	0.702479	0.92562	0.256198
0.319277	0.457831	0.222892	0.278788	0.145455	0.187879	0.012048	0.192771	0.385542	0.716867	0.993976	0.018072	0.307229	0.626506	0.819277	1	0.006024	0.222892	0.415663	0.542169	0.915663	0.590361	0.114458	0.295181	0.054545	0.042424	0.006061	0.006024	0.210843	0.584337	0.813253	1	0.066265	0.144578	0.26506	0.885542	0.915663	0.03012	0.325301	0.39759	0.536145	0.674699	0.421687	0.363636	0.042169	0.222892	0.433735	0.596386	0.915663	0.445783
0.419355	0.314516	0.266129	0.260163	0.186992	0.178862	0.016129	0.290323	0.540323	0.766129	1	0.040323	0.225806	0.435484	0.798387	0.991935	0.008065	0.193548	0.403226	0.629032	0.870968	0.483871	0.153226	0.362903	0.04878	0.065041	0	0.008065	0.241935	0.58871	0.879032	1	0.169355	0.193548	0.298387	0.33871	0.645161	0.040323	0.395161	0.483871	0.741935	0.83871	0.435484	0.276423	0.056452	0.298387	0.435484	0.620968	0.83871	0.387097
0.376712	0.273973	0.349315	0.186207	0.268966	0.206897	0.020548	0.184932	0.472603	0.719178	0.958904	0.013699	0.280822	0.486301	0.828767	1	0.006849	0.219178	0.513699	0.705479	0.965753	0.369863	0.150685	0.479452	0.055172	0.055172	0.013793	0.006849	0.150685	0.294521	0.458904	1	0.191781	0.219178	0.410959	0.445205	0.746575	0.068493	0.5	0.623288	0.856164	0.979452	0.445205	0.372414	0.047945	0.363014	0.541096	0.705479	0.972603	0.246575
0.372671	0.304348	0.322981	0.225	0.19375	0.25	0.018634	0.192547	0.42236	0.726708	1	0.012422	0.223602	0.496894	0.751553	0.987578	0.006211	0.279503	0.540373	0.745342	0.956522	0.428571	0.15528	0.416149	0.0625	0.0625	0	0.006211	0.130435	0.341615	0.677019	1	0.248447	0.279503	0.453416	0.490683	0.757764	0.024845	0.509317	0.614907	0.832298	0.937888	0.403727	0.425	0.031056	0.291925	0.540373	0.745342	0.956522	0.329193
0.385965	0.280702	0.333333	0.19469	0.238938	0.19469	0.04386	0.210526	0.491228	0.701754	1	0.026316	0.368421	0.614035	0.789474	0.991228	0.008772	0.175439	0.429825	0.710526	0.973684	0.385965	0.166667	0.447368	0.044248	0.097345	0.00885	0.008772	0.192982	0.350877	0.692982	1	0.263158	0.289474	0.394737	0.438596	0.745614	0.061404	0.447368	0.578947	0.859649	0.973684	0.429825	0.371681	0.035088	0.315789	0.535088	0.719298	0.973684	0.307018
0.382812	0.257812	0.359375	0.173228	0.275591	0.188976	0.023438	0.296875	0.554688	0.804688	1	0.03125	0.1875	0.367188	0.585938	0.984375	0.007812	0.25	0.53125	0.71875	0.929688	0.421875	0.148438	0.429688	0.062992	0.07874	0	0.007812	0.140625	0.359375	0.742188	1	0.125	0.296875	0.390625	0.429688	0.726562	0.0625	0.460938	0.570312	0.828125	0.9375	0.40625	0.393701	0.046875	0.328125	0.523438	0.703125	0.929688	0.234375
0.316667	0.35	0.333333	0.226891	0.226891	0.260504	0.05	0.216667	0.508333	0.733333	0.991667	0.025	0.266667	0.483333	0.741667	0.983333	0.008333	0.241667	0.458333	0.725	1	0.383333	0.166667	0.45	0.05042	0.084034	0	0.008333	0.183333	0.341667	0.691667	1	0.233333	0.266667	0.4	0.7	0.741667	0.033333	0.458333	0.583333	0.85	0.966667	0.491667	0.369748	0.05	0.375	0.525	0.725	0.966667	0.391667
0.446429	0.196429	0.357143	0.153153	0.306306	0.171171	0.017857	0.1875	0.535714	0.821429	1	0.044643	0.276786	0.401786	0.625	0.955357	0.008929	0.223214	0.464286	0.714286	0.991071	0.294643	0.232143	0.473214	0.09009	0.072072	0	0.008929	0.1875	0.401786	0.678571	1	0.035714	0.196429	0.276786	0.366071	0.723214	0.098214	0.446429	0.5625	0.839286	0.964286	0.428571	0.396396	0.044643	0.276786	0.464286	0.705357	0.928571	0.160714
0.45045	0.198198	0.351351	0.1	0.309091	0.118182	0.018018	0.171171	0.522523	0.765766	1	0.117117	0.207207	0.333333	0.468468	0.810811	0.009009	0.252252	0.594595	0.792793	0.990991	0.351351	0.171171	0.477477	0.072727	0.054545	0.018182	0.009009	0.171171	0.315315	0.684685	1	0.234234	0.261261	0.378378	0.720721	0.972973	0.081081	0.441441	0.558559	0.837838	0.963964	0.432432	0.381818	0.045045	0.261261	0.477477	0.72973	0.990991	0.198198
0.438017	0.280992	0.280992	0.283333	0.233333	0.133333	0.016529	0.239669	0.504132	0.694215	0.991736	0.024793	0.231405	0.454545	0.809917	0.975207	0.008264	0.190083	0.53719	0.710744	1	0.429752	0.157025	0.413223	0.041667	0.075	0.008333	0.008264	0.190083	0.355372	0.768595	1	0.256198	0.280992	0.38843	0.429752	0.735537	0.066116	0.446281	0.570248	0.801653	0.909091	0.454545	0.366667	0.041322	0.305785	0.528926	0.719008	0.966942	0.322314
0.403361	0.218487	0.378151	0.177966	0.313559	0.177966	0.033613	0.226891	0.512605	0.680672	0.991597	0.016807	0.193277	0.428571	0.789916	0.97479	0.008403	0.252101	0.453782	0.739496	1	0.369748	0.142857	0.487395	0.059322	0.059322	0.025424	0.008403	0.134454	0.352941	0.722689	1	0.042017	0.302521	0.336134	0.739496	0.781513	0.092437	0.453782	0.579832	0.857143	0.983193	0.462185	0.40678	0.042017	0.319328	0.521008	0.739496	0.97479	0.243697
0.438017	0.272727	0.289256	0.208333	0.233333	0.191667	0.016529	0.206612	0.471074	0.719008	1	0.041322	0.256198	0.553719	0.735537	0.983471	0.008264	0.247934	0.495868	0.694215	0.991736	0.421488	0.157025	0.421488	0.041667	0.091667	0.008333	0.008264	0.198347	0.619835	0.892562	1	0.22314	0.247934	0.355372	0.396694	0.702479	0.033058	0.14876	0.520661	0.77686	0.884298	0.429752	0.35	0.057851	0.347107	0.495868	0.68595	0.917355	0.239669
0.35461	0.248227	0.397163	0.192857	0.271429	0.178571	0.021277	0.205674	0.48227	0.723404	1	0.035461	0.35461	0.510638	0.702128	0.985816	0.007092	0.163121	0.475177	0.758865	0.978723	0.319149	0.148936	0.531915	0.05	0.092857	0.007143	0.007092	0.319149	0.446809	0.751773	1	0.120567	0.390071	0.48227	0.51773	0.787234	0.021277	0.184397	0.567376	0.702128	0.971631	0.489362	0.414286	0.021277	0.191489	0.510638	0.716312	0.971631	0.205674
0.350365	0.321168	0.328467	0.169118	0.220588	0.242647	0.080292	0.328467	0.532847	0.773723	1	0.014599	0.189781	0.372263	0.729927	0.970803	0.007299	0.240876	0.481752	0.737226	0.978102	0.328467	0.153285	0.518248	0.051471	0.080882	0.007353	0.007299	0.189781	0.343066	0.773723	1	0.218978	0.262774	0.29927	0.386861	0.708029	0.080292	0.474453	0.605839	0.810219	0.978102	0.467153	0.426471	0.051095	0.284672	0.481752	0.729927	0.978102	0.291971
0.289062	0.351562	0.359375	0.204724	0.251969	0.19685	0.0625	0.28125	0.523438	0.679688	0.960938	0.03125	0.21875	0.414062	0.71875	1	0.007812	0.234375	0.5	0.757812	0.992188	0.476562	0.164062	0.359375	0.047244	0.094488	0	0.007812	0.1875	0.359375	0.710938	1	0.226562	0.257812	0.445312	0.75	0.796875	0.039062	0.492188	0.601562	0.867188	0.960938	0.4375	0.425197	0.023438	0.25	0.46875	0.75	0.96875	0.328125
0.385185	0.318519	0.296296	0.231343	0.201493	0.179104	0.02963	0.288889	0.496296	0.733333	0.97037	0.022222	0.222222	0.562963	0.888889	1	0.007407	0.251852	0.437037	0.651852	0.955556	0.459259	0.133333	0.407407	0.044776	0.089552	0	0.007407	0.207407	0.437037	0.881481	1	0.244444	0.266667	0.362963	0.392593	0.666667	0.059259	0.17037	0.525926	0.748148	0.851852	0.414815	0.328358	0.044444	0.348148	0.496296	0.666667	0.962963	0.340741
0.387931	0.301724	0.310345	0.243478	0.217391	0.208696	0.034483	0.172414	0.508621	0.681034	1	0.025862	0.232759	0.422414	0.767241	0.991379	0.008621	0.293103	0.534483	0.724138	0.974138	0.396552	0.163793	0.439655	0.052174	0.104348	0	0.008621	0.189655	0.353448	0.758621	1	0.241379	0.267241	0.37931	0.422414	0.75	0.043103	0.439655	0.568966	0.836207	0.948276	0.439655	0.330435	0.068966	0.37069	0.534483	0.732759	0.974138	0.301724
0.363014	0.363014	0.273973	0.310345	0.213793	0.17931	0.020548	0.253425	0.554795	0.753425	0.993151	0.013699	0.212329	0.410959	0.719178	1	0.006849	0.267123	0.486301	0.726027	0.90411	0.527397	0.130137	0.342466	0.041379	0.096552	0	0.006849	0.143836	0.369863	0.671233	1	0.260274	0.280822	0.452055	0.712329	0.746575	0.10274	0.513699	0.616438	0.815068	0.917808	0.39726	0.275862	0.068493	0.273973	0.554795	0.712329	0.924658	0.424658
0.344	0.392	0.264	0.290323	0.145161	0.217742	0.136	0.312	0.536	0.728	0.992	0.016	0.208	0.448	0.736	1	0.008	0.176	0.456	0.72	0.96	0.392	0.184	0.424	0.064516	0.080645	0	0.008	0.24	0.392	0.72	1	0.04	0.288	0.336	0.456	0.768	0.096	0.208	0.6	0.848	0.96	0.52	0.274194	0.032	0.2	0.456	0.656	0.96	0.456
0.373913	0.330435	0.295652	0.22807	0.210526	0.201754	0.017391	0.226087	0.530435	0.791304	0.991304	0.034783	0.191304	0.382609	0.678261	1	0.008696	0.26087	0.591304	0.730435	0.965217	0.391304	0.165217	0.443478	0.04386	0.096491	0.008772	0.008696	0.2	0.356522	0.765217	1	0.234783	0.26087	0.373913	0.417391	0.73913	0.034783	0.156522	0.547826	0.817391	0.930435	0.452174	0.368421	0.06087	0.373913	0.530435	0.730435	0.965217	0.295652
0.35	0.45	0.2	0.305439	0.125523	0.138075	0.008333	0.1875	0.5125	0.766667	1	0.029167	0.2375	0.420833	0.583333	0.9875	0.004167	0.575	0.725	0.85	0.995833	0.645833	0.083333	0.270833	0.033473	0.09205	0	0.004167	0.1875	0.366667	0.5625	1	0.575	0.666667	0.6875	0.733333	0.8875	0.0125	0.5125	0.779167	0.904167	0.979167	0.2875	0.292887	0.025	0.404167	0.683333	0.829167	0.983333	0.4875
0.452991	0.17094	0.376068	0.163793	0.284483	0.137931	0.025641	0.239316	0.512821	0.760684	0.991453	0.017094	0.222222	0.401709	0.675214	1	0.008547	0.273504	0.538462	0.74359	0.982906	0.376068	0.188034	0.435897	0.068966	0.103448	0	0.008547	0.094017	0.376068	0.675214	1	0.213675	0.273504	0.324786	0.700855	0.752137	0.111111	0.444444	0.57265	0.82906	0.957265	0.470085	0.37931	0.042735	0.307692	0.521368	0.726496	0.982906	0.188034
0.415929	0.19469	0.389381	0.116071	0.303571	0.169643	0.026549	0.185841	0.442478	0.752212	1	0.017699	0.221239	0.477876	0.654867	0.814159	0.00885	0.265487	0.566372	0.778761	0.955752	0.371681	0.221239	0.40708	0.107143	0.053571	0	0.00885	0.19469	0.353982	0.752212	1	0.035398	0.247788	0.362832	0.707965	0.831858	0.097345	0.442478	0.548673	0.876106	0.982301	0.469027	0.428571	0.035398	0.274336	0.477876	0.725664	0.955752	0.221239
0.304054	0.459459	0.236486	0.340136	0.142857	0.204082	0.013514	0.202703	0.445946	0.682432	1	0.02027	0.27027	0.581081	0.831081	0.993243	0.006757	0.243243	0.459459	0.614865	0.932432	0.533784	0.121622	0.344595	0.034014	0.061224	0.006803	0.006757	0.202703	0.628378	0.864865	1	0.243243	0.263514	0.344595	0.371622	0.621622	0.087838	0.378378	0.47973	0.689189	0.777027	0.405405	0.312925	0.047297	0.324324	0.459459	0.614865	0.898649	0.493243
0.380328	0.498361	0.121311	0.273026	0.098684	0.095395	0.006557	0.180328	0.488525	0.744262	1	0.013115	0.27541	0.406557	0.737705	0.996721	0.003279	0.55082	0.629508	0.763934	0.927869	0.806557	0.095082	0.098361	0.039474	0.039474	0	0.003279	0.219672	0.422951	0.793443	1	0.045902	0.613115	0.67541	0.757377	0.783607	0.032787	0.491803	0.586885	0.704918	0.957377	0.186885	0.203947	0.009836	0.540984	0.636066	0.721311	0.957377	0.511475
0.371631	0.30922	0.319149	0.225852	0.245739	0.200284	0.002837	0.228369	0.466667	0.731915	0.997163	0.021277	0.303546	0.521986	0.750355	0.998582	0.001418	0.231206	0.502128	0.756028	1	0.414184	0.24539	0.340426	0.089489	0.06108	0.004261	0.001418	0.253901	0.443972	0.747518	1	0.075177	0.194326	0.428369	0.880851	0.987234	0.004255	0.31773	0.565957	0.737589	0.869504	0.537589	0.386364	0.008511	0.287943	0.503546	0.757447	0.987234	0.286525
0.36646	0.291925	0.341615	0.199067	0.239502	0.244168	0.003106	0.248447	0.51087	0.729814	0.995342	0.004658	0.26087	0.490683	0.751553	1	0.001553	0.237578	0.495342	0.776398	0.998447	0.416149	0.231366	0.352484	0.088647	0.060653	0.007776	0.001553	0.23913	0.431677	0.703416	1	0.051242	0.190994	0.420807	0.902174	0.987578	0.003106	0.321429	0.621118	0.756211	0.993789	0.552795	0.382582	0.006211	0.273292	0.495342	0.753106	0.998447	0.296584
0.352617	0.311295	0.336088	0.205517	0.230345	0.216552	0.002755	0.239669	0.480716	0.731405	0.991736	0.006887	0.257576	0.517906	0.754821	0.997245	0.001377	0.241047	0.508264	0.761708	1	0.42562	0.23416	0.34022	0.084138	0.062069	0.004138	0.001377	0.241047	0.428375	0.712121	1	0.11157	0.230028	0.487603	0.898072	0.998623	0.008264	0.322314	0.578512	0.750689	0.885675	0.539945	0.377931	0.00551	0.289256	0.512397	0.758953	0.995868	0.327824
0.404138	0.256552	0.33931	0.205801	0.270718	0.191989	0.002759	0.246897	0.506207	0.773793	1	0.015172	0.268966	0.503448	0.73931	0.997241	0.001379	0.238621	0.475862	0.725517	0.994483	0.445517	0.238621	0.315862	0.087017	0.053867	0.004144	0.001379	0.244138	0.445517	0.743448	1	0.064828	0.188966	0.412414	0.851034	0.950345	0.002759	0.317241	0.590345	0.711724	0.84	0.522759	0.361878	0.006897	0.275862	0.488276	0.728276	0.950345	0.268966
0.373093	0.278779	0.348128	0.197222	0.265278	0.211111	0.004161	0.235784	0.507628	0.732316	1	0.002774	0.242718	0.460472	0.743412	0.998613	0.001387	0.259362	0.503467	0.753121	0.997226	0.436893	0.238558	0.324549	0.0875	0.059722	0.004167	0.001387	0.231623	0.43828	0.705964	1	0.074896	0.208044	0.47018	0.897365	0.997226	0.008322	0.327323	0.615811	0.754508	0.883495	0.532594	0.372222	0.005548	0.280166	0.499307	0.750347	0.997226	0.29681
0.385629	0.337725	0.276647	0.272182	0.201439	0.183453	0.003593	0.235928	0.51497	0.776048	1	0.002395	0.273054	0.535329	0.760479	0.998802	0.001198	0.233533	0.432335	0.674251	0.972455	0.486228	0.203593	0.31018	0.07554	0.063549	0.003597	0.001198	0.247904	0.523353	0.832335	1	0.086228	0.202395	0.427545	0.790419	0.877844	0.010778	0.300599	0.51497	0.693413	0.958084	0.474251	0.338129	0.005988	0.25988	0.456287	0.673054	0.966467	0.354491
0.295669	0.404896	0.299435	0.273585	0.167925	0.273585	0.003766	0.210923	0.451977	0.72693	0.998117	0.013183	0.26742	0.506591	0.745763	0.996234	0.001883	0.250471	0.512241	0.747646	1	0.399247	0.07533	0.525424	0.030189	0.09434	0.003774	0.001883	0.244821	0.610169	0.79096	1	0.05838	0.681733	0.766478	0.919021	0.964218	0.00565	0.239171	0.436911	0.606403	0.992467	0.595104	0.369811	0.007533	0.274953	0.525424	0.762712	0.990584	0.444444
0.289474	0.479532	0.230994	0.243402	0.173021	0.184751	0.035088	0.292398	0.52924	0.815789	0.997076	0.005848	0.254386	0.552632	0.710526	0.994152	0.002924	0.154971	0.347953	0.777778	1	0.532164	0.195906	0.27193	0.070381	0.064516	0	0.002924	0.207602	0.517544	0.725146	1	0.076023	0.365497	0.494152	0.842105	0.97076	0.008772	0.22807	0.461988	0.657895	0.929825	0.435673	0.375367	0.011696	0.295322	0.502924	0.760234	0.973684	0.491228
0.308219	0.424658	0.267123	0.237113	0.195876	0.237113	0.034247	0.321918	0.554795	0.797945	0.996575	0.006849	0.178082	0.496575	0.688356	0.986301	0.003425	0.205479	0.400685	0.743151	1	0.575342	0.208904	0.215753	0.085911	0.051546	0.003436	0.003425	0.19863	0.434932	0.702055	1	0.044521	0.39726	0.523973	0.815068	0.969178	0.020548	0.35274	0.5	0.763699	0.921233	0.39726	0.309278	0.017123	0.311644	0.496575	0.791096	0.972603	0.465753
0.331307	0.410334	0.258359	0.323171	0.170732	0.246951	0.033435	0.346505	0.56535	0.787234	0.993921	0.006079	0.173252	0.413374	0.699088	1	0.00304	0.191489	0.510638	0.753799	0.969605	0.537994	0.221884	0.240122	0.088415	0.051829	0.003049	0.00304	0.243161	0.422492	0.723404	1	0.015198	0.288754	0.583587	0.756839	0.969605	0.036474	0.197568	0.504559	0.784195	0.927052	0.422492	0.353659	0.012158	0.164134	0.477204	0.75076	0.972644	0.43465
0.296296	0.416667	0.287037	0.232198	0.176471	0.28483	0.07716	0.299383	0.515432	0.740741	0.978395	0.006173	0.197531	0.503086	0.759259	1	0.003086	0.209877	0.462963	0.703704	0.993827	0.481481	0.262346	0.256173	0.105263	0.06192	0	0.003086	0.212963	0.54321	0.780864	1	0.015432	0.277778	0.450617	0.753086	0.950617	0.101852	0.246914	0.524691	0.716049	0.984568	0.438272	0.297214	0.009259	0.200617	0.453704	0.731481	0.993827	0.432099
0.375167	0.381842	0.242991	0.284759	0.168449	0.167112	0.00267	0.214953	0.453939	0.75968	1	0.004005	0.23231	0.503338	0.739653	0.995995	0.001335	0.335113	0.544726	0.735648	0.99733	0.568758	0.130841	0.300401	0.045455	0.072193	0.002674	0.001335	0.158879	0.41522	0.728972	1	0.238985	0.424566	0.611482	0.731642	0.837116	0.004005	0.359146	0.558077	0.774366	0.949266	0.425901	0.339572	0.004005	0.325768	0.522029	0.732977	0.99733	0.421896
0.330645	0.4	0.269355	0.253635	0.15832	0.208401	0.022581	0.3	0.530645	0.820968	1	0.003226	0.204839	0.45	0.695161	0.985484	0.001613	0.282258	0.529032	0.724194	0.974194	0.540323	0.140323	0.319355	0.050081	0.072698	0.004847	0.001613	0.143548	0.408065	0.759677	1	0.174194	0.403226	0.614516	0.727419	0.848387	0.006452	0.340323	0.551613	0.746774	0.977419	0.503226	0.310178	0.006452	0.287097	0.491935	0.696774	0.974194	0.440323
0.40717	0.348271	0.244558	0.269231	0.167949	0.174359	0.002561	0.201024	0.448143	0.727273	1	0.010243	0.266325	0.550576	0.763124	0.997439	0.00128	0.307298	0.548015	0.741357	0.99872	0.545455	0.12548	0.329065	0.042308	0.085897	0.003846	0.00128	0.158771	0.446863	0.792574	1	0.215109	0.444302	0.596671	0.704225	0.841229	0.003841	0.321383	0.498079	0.71959	0.994878	0.4379	0.305128	0.003841	0.317542	0.504481	0.705506	0.994878	0.389245
0.381089	0.372493	0.246418	0.247126	0.16092	0.201149	0.008596	0.234957	0.444126	0.716332	0.991404	0.005731	0.157593	0.446991	0.724928	0.997135	0.002865	0.378223	0.567335	0.782235	1	0.481375	0.22063	0.297994	0.063218	0.057471	0.005747	0.002865	0.140401	0.432665	0.719198	1	0.409742	0.60745	0.802292	0.876791	0.994269	0.071633	0.206304	0.312321	0.495702	0.762178	0.424069	0.287356	0.04298	0.446991	0.627507	0.805158	0.994269	0.366762
0.271357	0.522613	0.20603	0.262626	0.121212	0.207071	0.01005	0.226131	0.502513	0.743719	0.98995	0.045226	0.271357	0.562814	0.798995	1	0.005025	0.231156	0.40201	0.547739	0.964824	0.648241	0.201005	0.150754	0.070707	0.020202	0	0.005025	0.180905	0.60804	0.834171	1	0.025126	0.326633	0.492462	0.638191	0.698492	0.226131	0.256281	0.361809	0.396985	0.437186	0.351759	0.262626	0.020101	0.251256	0.386935	0.532663	0.964824	0.537688
0.372781	0.313609	0.313609	0.238095	0.244048	0.27381	0.017751	0.349112	0.568047	0.781065	1	0.011834	0.183432	0.372781	0.704142	0.994083	0.005917	0.189349	0.47929	0.692308	0.988166	0.502959	0.118343	0.378698	0.035714	0.059524	0	0.005917	0.230769	0.550296	0.852071	1	0.260355	0.284024	0.360947	0.390533	0.952663	0.017751	0.106509	0.532544	0.662722	0.757396	0.485207	0.369048	0.023669	0.153846	0.372781	0.615385	0.952663	0.325444
0.398058	0.330097	0.271845	0.235294	0.176471	0.196078	0.029126	0.145631	0.330097	0.592233	0.970874	0.019417	0.359223	0.582524	0.796117	0.990291	0.009709	0.262136	0.514563	0.825243	1	0.368932	0.029126	0.601942	0.019608	0.098039	0	0.009709	0.378641	0.631068	0.776699	1	0.951456	0.951456	0.951456	0.961165	0.970874	0.029126	0.165049	0.38835	0.61165	0.883495	0.368932	0.411765	0.126214	0.300971	0.640777	0.796117	0.951456	0.300971
0.295302	0.422819	0.281879	0.277027	0.168919	0.256757	0.073826	0.422819	0.590604	0.738255	0.986577	0.020134	0.161074	0.409396	0.758389	1	0.006711	0.234899	0.442953	0.697987	0.959732	0.61745	0.288591	0.09396	0.060811	0.02027	0.006757	0.006711	0.214765	0.510067	0.771812	1	0.33557	0.395973	0.503356	0.691275	0.818792	0.040268	0.053691	0.080537	0.825503	0.852349	0.33557	0.472973	0.040268	0.268456	0.456376	0.684564	0.926174	0.422819
0.386364	0.295455	0.318182	0.275862	0.218391	0.183908	0.045455	0.193182	0.454545	0.693182	1	0.022727	0.25	0.534091	0.75	0.988636	0.011364	0.227273	0.5	0.738636	0.977273	0.443182	0.443182	0.113636	0.103448	0.034483	0.011494	0.011364	0.193182	0.545455	0.727273	1	0.045455	0.204545	0.386364	0.5	0.829545	0.840909	0.852273	0.886364	0.909091	0.965909	0.386364	0.482759	0.068182	0.215909	0.477273	0.704545	0.909091	0.272727
0.359223	0.349515	0.291262	0.303922	0.137255	0.205882	0.048544	0.174757	0.466019	0.728155	1	0.019417	0.300971	0.485437	0.708738	0.980583	0.009709	0.223301	0.514563	0.757282	0.961165	0.601942	0.106796	0.291262	0.078431	0.078431	0	0.009709	0.165049	0.368932	0.640777	1	0.126214	0.291262	0.320388	0.427184	0.61165	0.038835	0.533981	0.757282	0.825243	0.951456	0.378641	0.372549	0.038835	0.320388	0.553398	0.805825	0.961165	0.330097
0.455882	0.25	0.294118	0.298507	0.238806	0.149254	0.029412	0.176471	0.455882	0.720588	0.985294	0.117647	0.235294	0.441176	0.602941	0.911765	0.014706	0.308824	0.485294	0.838235	1	0.558824	0.029412	0.411765	0.029851	0.059701	0	0.014706	0.132353	0.411765	0.573529	1	0.470588	0.470588	0.470588	0.470588	0.485294	0.279412	0.367647	0.676471	0.779412	0.882353	0.367647	0.447761	0.073529	0.323529	0.544118	0.764706	0.926471	0.264706
0.488235	0.264706	0.247059	0.272189	0.201183	0.201183	0.029412	0.235294	0.494118	0.794118	0.994118	0.011765	0.205882	0.441176	0.729412	0.988235	0.005882	0.294118	0.517647	0.652941	1	0.770588	0.041176	0.188235	0.053254	0.029586	0.005917	0.005882	0.188235	0.441176	0.8	1	0.358824	0.358824	0.470588	0.741176	0.852941	0.394118	0.435294	0.570588	0.617647	0.705882	0.247059	0.284024	0.047059	0.405882	0.570588	0.647059	0.976471	0.252941
0.420213	0.324468	0.255319	0.28877	0.144385	0.203209	0.010638	0.239362	0.478723	0.680851	1	0.026596	0.223404	0.37766	0.75	0.984043	0.005319	0.319149	0.601064	0.787234	0.994681	0.617021	0.101064	0.281915	0.064171	0.064171	0	0.005319	0.164894	0.324468	0.632979	1	0.058511	0.590426	0.617021	0.680851	0.792553	0.388298	0.457447	0.734043	0.87766	0.989362	0.303191	0.352941	0.031915	0.404255	0.617021	0.81383	0.957447	0.31383
0.389831	0.313559	0.29661	0.247863	0.222222	0.179487	0.025424	0.237288	0.644068	0.822034	1	0.016949	0.279661	0.423729	0.652542	0.957627	0.008475	0.20339	0.415254	0.601695	0.983051	0.584746	0.186441	0.228814	0.08547	0.08547	0	0.008475	0.29661	0.610169	0.754237	1	0.254237	0.288136	0.432203	0.5	0.830508	0.101695	0.144068	0.20339	0.872881	0.974576	0.474576	0.273504	0.033898	0.279661	0.40678	0.59322	0.983051	0.279661
0.326531	0.397959	0.27551	0.216495	0.103093	0.298969	0.030612	0.214286	0.367347	0.887755	1	0.020408	0.377551	0.55102	0.765306	0.979592	0.010204	0.153061	0.408163	0.612245	0.826531	0.591837	0.214286	0.193878	0.103093	0.061856	0	0.010204	0.27551	0.683673	0.846939	1	0.306122	0.346939	0.510204	0.591837	0.816327	0.122449	0.153061	0.204082	0.428571	0.673469	0.510204	0.247423	0.05102	0.326531	0.469388	0.673469	0.816327	0.326531
0.389474	0.336842	0.273684	0.297872	0.244681	0.191489	0.031579	0.189474	0.463158	0.736842	1	0.021053	0.273684	0.505263	0.757895	0.947368	0.010526	0.231579	0.410526	0.684211	0.978947	0.2	0	0.8	0	0.06383	0	0.010526	0.473684	0.526316	0.789474	1	0	0	0	0	0	0.042105	0.231579	0.431579	0.694737	0.978947	0.305263	0.425532	0.073684	0.326316	0.568421	0.715789	0.978947	0.294737
0.412371	0.28866	0.298969	0.197917	0.21875	0.260417	0.030928	0.195876	0.42268	0.701031	0.979381	0.020619	0.268041	0.536082	0.783505	0.989691	0.010309	0.319588	0.515464	0.721649	1	0.216495	0	0.783505	0	0.0625	0	0.010309	0.453608	0.71134	0.762887	1	0	0	0	0	0	0.041237	0.226804	0.42268	0.670103	0.948454	0.309278	0.395833	0.061856	0.319588	0.56701	0.721649	0.969072	0.278351
[truncated: 1,816 more rows]
[truncated: 83 more columns]
