# Supplementary material for: Prediction of RNA‐Binding Proteins by Voting Systems
Source: Hindawi journal article supplement (doi:10.1155/2011/506205), 2011-01-01
Supplement: f2 [file 506205.f2.xls]

## Sheet: 10-CV_Train_Dataset_Result
DataSet	Method	ACC	MCC	STDEV_ACC	STDEV_MCC
1	AdaBoostM1	0.730015	0.467625
1	J48	0.715843	0.431693
1	IBk	0.74891	0.504735
1	MultiClassClassifier	0.790334	0.580724
1	PART	0.734738	0.476057
1	MultilayerPerceptron	0.772529	0.54551
1	KStar	0.68859	0.382326
1	Bagging	0.789971	0.581605
1	NBTree	0.719113	0.438299
1	Decorate	0.771439	0.545355
1	RandomForest	0.768895	0.543563
1	JRip	0.738735	0.477941
1	RandomCommittee	0.72202	0.453321
1	FilteredClassifier	0.742733	0.485737
1	ClassificationViaRegression	0.758721	0.518152
1	Dagging	0.787064	0.57536
1	AttributeSelectedClassifier	0.743459	0.48705
1	REPTree	0.742369	0.485021
1	SMO	0.793605	0.587299
1	J48graft	0.728561	0.457345
1	Ridor	0.735828	0.478447
1	RandomSubSpace	0.778343	0.558409
1	EnsembleSelection	0.765988	0.534221
1	SimpleLogistic	0.78561	0.571339
1	DecisionTable	0.727108	0.462351
1	DataNearBalancedND	0.715843	0.431693
1	RacedIncrementalLogitBoost	0.698765	0.413346
1	SimpleCart	0.742369	0.485385
1	LogitBoost	0.759811	0.522141
1	ND	0.715843	0.431693
1	BayesNet	0.743823	0.49119
1	ClassBalancedND	0.715843	0.431693
1	OrdinalClassClassifier	0.715843	0.431693
1	END	0.715843	0.431693
2	AdaBoostM1	0.738735	0.486439
2	J48	0.735102	0.470205
2	IBk	0.735102	0.477967
2	MultiClassClassifier	0.791061	0.582135
2	PART	0.727108	0.459444
2	MultilayerPerceptron	0.760538	0.524327
2	KStar	0.68859	0.387744
2	Bagging	0.794695	0.59074
2	NBTree	0.714026	0.428261
2	Decorate	0.777253	0.557275
2	RandomForest	0.754724	0.518719
2	JRip	0.749273	0.499087
2	RandomCommittee	0.716206	0.442137
2	FilteredClassifier	0.723474	0.448462
2	ClassificationViaRegression	0.75109	0.502403
2	Dagging	0.788881	0.578448
2	AttributeSelectedClassifier	0.740552	0.481693
2	REPTree	0.738009	0.477994
2	SMO	0.793241	0.58649
2	J48graft	0.75109	0.502239
2	Ridor	0.734012	0.470061
2	RandomSubSpace	0.765262	0.531098
2	EnsembleSelection	0.773619	0.549438
2	SimpleLogistic	0.789244	0.578494
2	DecisionTable	0.728924	0.462763
2	DataNearBalancedND	0.735102	0.470205
2	RacedIncrementalLogitBoost	0.698401	0.412325
2	SimpleCart	0.752907	0.506671
2	LogitBoost	0.757631	0.516711
2	ND	0.735102	0.470205
2	BayesNet	0.737282	0.476865
2	ClassBalancedND	0.735102	0.470205
2	OrdinalClassClassifier	0.735102	0.470205
2	END	0.735102	0.470205
3	AdaBoostM1	0.735102	0.474703
3	J48	0.72202	0.444168
3	IBk	0.744913	0.496328
3	MultiClassClassifier	0.78125	0.562572
3	PART	0.744186	0.497761
3	MultilayerPerceptron	0.78343	0.568424
3	KStar	0.672602	0.350623
3	Bagging	0.780887	0.562952
3	NBTree	0.696221	0.392608
3	Decorate	0.783067	0.568484
3	RandomForest	0.763808	0.53462
3	JRip	0.742369	0.485185
3	RandomCommittee	0.712936	0.435658
3	FilteredClassifier	0.709666	0.419334
3	ClassificationViaRegression	0.751453	0.503043
3	Dagging	0.783794	0.567839
3	AttributeSelectedClassifier	0.735465	0.471129
3	REPTree	0.738735	0.48138
3	SMO	0.788517	0.577172
3	J48graft	0.739099	0.47854
3	Ridor	0.710392	0.420906
3	RandomSubSpace	0.768532	0.53944
3	EnsembleSelection	0.772166	0.546591
3	SimpleLogistic	0.786337	0.572704
3	DecisionTable	0.727834	0.467135
3	DataNearBalancedND	0.72202	0.444168
3	RacedIncrementalLogitBoost	0.697674	0.40912
3	SimpleCart	0.730741	0.463787
3	LogitBoost	0.747093	0.496338
3	ND	0.72202	0.444168
3	BayesNet	0.736192	0.475529
3	ClassBalancedND	0.72202	0.444168
3	OrdinalClassClassifier	0.72202	0.444168
3	END	0.72202	0.444168
4	AdaBoostM1	0.727108	0.461966
4	J48	0.730015	0.460093
4	IBk	0.741279	0.490199
4	MultiClassClassifier	0.779433	0.558884
4	PART	0.731468	0.465825
4	MultilayerPerceptron	0.78343	0.573069
4	KStar	0.683866	0.373168
4	Bagging	0.773619	0.548839
4	NBTree	0.71548	0.431279
4	Decorate	0.791788	0.585845
4	RandomForest	0.775073	0.557248
4	JRip	0.738735	0.477527
4	RandomCommittee	0.726381	0.460615
4	FilteredClassifier	0.726017	0.452157
4	ClassificationViaRegression	0.743459	0.487514
4	Dagging	0.777253	0.555331
4	AttributeSelectedClassifier	0.735102	0.471281
4	REPTree	0.733285	0.469676
4	SMO	0.78452	0.569044
4	J48graft	0.738009	0.476033
4	Ridor	0.727471	0.455011
4	RandomSubSpace	0.758358	0.518344
4	EnsembleSelection	0.772166	0.548584
4	SimpleLogistic	0.783067	0.566134
4	DecisionTable	0.724927	0.459826
4	DataNearBalancedND	0.730015	0.460093
4	RacedIncrementalLogitBoost	0.688953	0.39
4	SimpleCart	0.745276	0.492275
4	LogitBoost	0.749637	0.502307
4	ND	0.730015	0.460093
4	BayesNet	0.747456	0.496305
4	ClassBalancedND	0.730015	0.460093
4	OrdinalClassClassifier	0.730015	0.460093
4	END	0.730015	0.460093
5	AdaBoostM1	0.72202	0.451251
5	J48	0.707122	0.414371
5	IBk	0.741642	0.489999
5	MultiClassClassifier	0.784157	0.568387
5	PART	0.733285	0.473957
5	MultilayerPerceptron	0.779433	0.564804
5	KStar	0.675145	0.356515
5	Bagging	0.775436	0.552909
5	NBTree	0.71984	0.440172
5	Decorate	0.780523	0.564144
5	RandomForest	0.767805	0.542021
5	JRip	0.732922	0.466957
5	RandomCommittee	0.715843	0.439605
5	FilteredClassifier	0.721657	0.443344
5	ClassificationViaRegression	0.736192	0.472896
5	Dagging	0.782703	0.56662
5	AttributeSelectedClassifier	0.721294	0.442916
5	REPTree	0.728198	0.457057
5	SMO	0.791788	0.583764
5	J48graft	0.714026	0.428347
5	Ridor	0.718023	0.43627
5	RandomSubSpace	0.762718	0.526801
5	EnsembleSelection	0.757267	0.515899
5	SimpleLogistic	0.784157	0.568468
5	DecisionTable	0.718387	0.445236
5	DataNearBalancedND	0.707122	0.414371
5	RacedIncrementalLogitBoost	0.691134	0.395425
5	SimpleCart	0.734738	0.470121
5	LogitBoost	0.75327	0.509221
5	ND	0.707122	0.414371
5	BayesNet	0.730741	0.463653
5	ClassBalancedND	0.707122	0.414371
5	OrdinalClassClassifier	0.707122	0.414371
5	END	0.707122	0.414371
6	AdaBoostM1	0.737282	0.476796
6	J48	0.718387	0.436774
6	IBk	0.746003	0.499862
6	MultiClassClassifier	0.792151	0.584312
6	PART	0.732195	0.472575
6	MultilayerPerceptron	0.776526	0.553117
6	KStar	0.682049	0.368713
6	Bagging	0.782703	0.56591
6	NBTree	0.708576	0.417173
6	Decorate	0.769985	0.541374
6	RandomForest	0.757631	0.521429
6	JRip	0.738735	0.477853
6	RandomCommittee	0.718023	0.442605
6	FilteredClassifier	0.706032	0.412347
6	ClassificationViaRegression	0.744913	0.490292
6	Dagging	0.776526	0.553876
6	AttributeSelectedClassifier	0.743459	0.489838
6	REPTree	0.736192	0.474013
6	SMO	0.793241	0.586495
6	J48graft	0.727108	0.454279
6	Ridor	0.709666	0.42006
6	RandomSubSpace	0.773256	0.548019
6	EnsembleSelection	0.762718	0.527908
6	SimpleLogistic	0.780887	0.561781
6	DecisionTable	0.71439	0.433288
6	DataNearBalancedND	0.718387	0.436774
6	RacedIncrementalLogitBoost	0.693677	0.387372
6	SimpleCart	0.747093	0.496338
6	LogitBoost	0.75218	0.50604
6	ND	0.718387	0.436774
6	BayesNet	0.736192	0.473846
6	ClassBalancedND	0.718387	0.436774
6	OrdinalClassClassifier	0.718387	0.436774
6	END	0.718387	0.436774
7	AdaBoostM1	0.728561	0.460444
7	J48	0.71766	0.435445
7	IBk	0.747093	0.498764
7	MultiClassClassifier	0.785974	0.571982
7	PART	0.739462	0.482491
7	MultilayerPerceptron	0.769985	0.541801
7	KStar	0.680233	0.365076
7	Bagging	0.787791	0.576606
7	NBTree	0.711119	0.422375
7	Decorate	0.773619	0.550388
7	RandomForest	0.767078	0.54055
7	JRip	0.746003	0.492738
7	RandomCommittee	0.716933	0.440223
7	FilteredClassifier	0.720567	0.441349
7	ClassificationViaRegression	0.757994	0.516229
7	Dagging	0.776163	0.552751
7	AttributeSelectedClassifier	0.750363	0.502136
7	REPTree	0.737645	0.478375
7	SMO	0.794695	0.589425
7	J48graft	0.728198	0.456673
7	Ridor	0.712936	0.426424
7	RandomSubSpace	0.778706	0.558334
7	EnsembleSelection	0.764172	0.530071
7	SimpleLogistic	0.78561	0.571231
7	DecisionTable	0.71766	0.443754
7	DataNearBalancedND	0.71766	0.435445
7	RacedIncrementalLogitBoost	0.701672	0.413915
7	SimpleCart	0.744913	0.491827
7	LogitBoost	0.756904	0.515369
7	ND	0.71766	0.435445
7	BayesNet	0.734375	0.470513
7	ClassBalancedND	0.71766	0.435445
7	OrdinalClassClassifier	0.71766	0.435445
7	END	0.71766	0.435445
8	AdaBoostM1	0.738009	0.480005
8	J48	0.72093	0.441907
8	IBk	0.747456	0.499349
8	MultiClassClassifier	0.797238	0.594479
8	PART	0.739462	0.486701
8	MultilayerPerceptron	0.745276	0.493777
8	KStar	0.695858	0.393848
8	Bagging	0.771439	0.544527
8	NBTree	0.697674	0.395891
8	Decorate	0.783794	0.568945
8	RandomForest	0.760901	0.528729
8	JRip	0.742369	0.484832
8	RandomCommittee	0.718023	0.444046
8	FilteredClassifier	0.708212	0.416647
8	ClassificationViaRegression	0.736555	0.474195
8	Dagging	0.788154	0.57654
8	AttributeSelectedClassifier	0.726381	0.454765
8	REPTree	0.72093	0.444035
8	SMO	0.796148	0.592298
8	J48graft	0.735828	0.47181
8	Ridor	0.716933	0.433938
8	RandomSubSpace	0.768169	0.538059
8	EnsembleSelection	0.758358	0.518284
8	SimpleLogistic	0.792515	0.585029
8	DecisionTable	0.696221	0.397845
8	DataNearBalancedND	0.72093	0.441907
8	RacedIncrementalLogitBoost	0.682776	0.372744
8	SimpleCart	0.739099	0.478594
8	LogitBoost	0.750363	0.501874
8	ND	0.72093	0.441907
8	BayesNet	0.736555	0.473166
8	ClassBalancedND	0.72093	0.441907
8	OrdinalClassClassifier	0.72093	0.441907
8	END	0.72093	0.441907
9	AdaBoostM1	0.727471	0.462268
9	J48	0.720567	0.441293
9	IBk	0.748547	0.506212
9	MultiClassClassifier	0.795422	0.590926
9	PART	0.731105	0.469904
9	MultilayerPerceptron	0.783067	0.566523
9	KStar	0.6875	0.380447
9	Bagging	0.77798	0.558419
9	NBTree	0.713299	0.427019
9	Decorate	0.787427	0.577725
9	RandomForest	0.756541	0.519282
9	JRip	0.735828	0.472034
9	RandomCommittee	0.718023	0.445782
9	FilteredClassifier	0.724201	0.448786
9	ClassificationViaRegression	0.760538	0.521285
9	Dagging	0.791424	0.582953
9	AttributeSelectedClassifier	0.737645	0.477108
9	REPTree	0.722747	0.445733
9	SMO	0.803779	0.607869
9	J48graft	0.736192	0.472864
9	Ridor	0.723837	0.45081
9	RandomSubSpace	0.765262	0.531135
9	EnsembleSelection	0.770349	0.542131
9	SimpleLogistic	0.794331	0.588768
9	DecisionTable	0.71439	0.440867
9	DataNearBalancedND	0.720567	0.441293
9	RacedIncrementalLogitBoost	0.686773	0.379263
9	SimpleCart	0.744549	0.489827
9	LogitBoost	0.750363	0.502424
9	ND	0.720567	0.441293
9	BayesNet	0.743459	0.48854
9	ClassBalancedND	0.720567	0.441293
9	OrdinalClassClassifier	0.720567	0.441293
9	END	0.720567	0.441293
10	AdaBoostM1	0.723474	0.453497
10	J48	0.735102	0.470294
10	IBk	0.753997	0.514676
10	MultiClassClassifier	0.793241	0.586509
10	PART	0.727834	0.456384
10	MultilayerPerceptron	0.78452	0.570642
10	KStar	0.69077	0.385594
10	Bagging	0.787064	0.576108
10	NBTree	0.705305	0.410619
10	Decorate	0.786701	0.575782
10	RandomForest	0.756541	0.519644
10	JRip	0.743459	0.486923
10	RandomCommittee	0.729288	0.466147
10	FilteredClassifier	0.729651	0.459832
10	ClassificationViaRegression	0.761628	0.523934
10	Dagging	0.797238	0.594781
10	AttributeSelectedClassifier	0.738735	0.478428
10	REPTree	0.732558	0.466252
10	SMO	0.800509	0.601019
10	J48graft	0.74673	0.4937
10	Ridor	0.733648	0.467324
10	RandomSubSpace	0.788881	0.579651
10	EnsembleSelection	0.783067	0.568191
10	SimpleLogistic	0.786701	0.573403
10	DecisionTable	0.713299	0.434864
10	DataNearBalancedND	0.735102	0.470294
10	RacedIncrementalLogitBoost	0.6875	0.37919
10	SimpleCart	0.743459	0.488315
10	LogitBoost	0.74782	0.49729
10	ND	0.735102	0.470294
10	BayesNet	0.740552	0.483334
10	ClassBalancedND	0.735102	0.470294
10	OrdinalClassClassifier	0.735102	0.470294
10	END	0.735102	0.470294
average	AdaBoostM1	0.730778	0.467499	0.00611514	0.011649
average	J48	0.722275	0.444624	0.00882636	0.0176372
average	IBk	0.745494	0.497809	0.00517357	0.01014
average	MultiClassClassifier	0.789026	0.578091	0.00602998	0.0120526
average	PART	0.734084	0.47411	0.00545677	0.0125167
average	MultilayerPerceptron	0.773874	0.550199	0.0126098	0.025181
average	KStar	0.68452	0.374405	0.00718379	0.0140909
average	Bagging	0.782158	0.565862	0.00764762	0.0151432
average	NBTree	0.710065	0.42037	0.00819259	0.0163922
average	Decorate	0.78056	0.563532	0.00731663	0.01467
average	RandomForest	0.7629	0.532581	0.00671611	0.0131717
average	JRip	0.740843	0.482108	0.00483526	0.00959651
average	RandomCommittee	0.719368	0.447014	0.00505263	0.00985654
average	FilteredClassifier	0.721221	0.4428	0.0110798	0.0222448
average	ClassificationViaRegression	0.750254	0.500994	0.0095972	0.0190747
average	Dagging	0.78492	0.57045	0.00696742	0.01379
average	AttributeSelectedClassifier	0.737246	0.475634	0.00845173	0.0170827
average	REPTree	0.733067	0.467954	0.00708384	0.014561
average	SMO	0.794004	0.588088	0.00546926	0.0109759
average	J48graft	0.734484	0.469183	0.0106024	0.0211741
average	Ridor	0.722275	0.445925	0.0100789	0.0213873
average	RandomSubSpace	0.770749	0.542929	0.00910358	0.018351
average	EnsembleSelection	0.767987	0.538132	0.00784272	0.0159904
average	SimpleLogistic	0.786846	0.573735	0.00414025	0.00828527
average	DecisionTable	0.718314	0.444793	0.00982494	0.02057
average	DataNearBalancedND	0.722275	0.444624	0.00882636	0.0176372
average	RacedIncrementalLogitBoost	0.692733	0.39527	0.00625919	0.0158794
average	SimpleCart	0.742515	0.486314	0.00630823	0.0125932
average	LogitBoost	0.752507	0.506971	0.00432482	0.00867084
average	ND	0.722275	0.444624	0.00882636	0.0176372
average	BayesNet	0.738663	0.479294	0.00505771	0.0102293
average	ClassBalancedND	0.722275	0.444624	0.00882636	0.0176372
average	OrdinalClassClassifier	0.722275	0.444624	0.00882636	0.0176372
average	END	0.722275	0.444624	0.00882636	0.0176372

## Sheet: Test_Dataset_Result
DataSet	Method	ACC	MCC	STDEV_ACC	STDEV_MCC
1	AdaBoostM1	0.713974	0.439891
1	J48	0.748908	0.498049
1	IBk	0.75182	0.509627
1	MultiClassClassifier	0.796943	0.59428
1	PART	0.738719	0.477499
1	MultilayerPerceptron	0.77147	0.567522
1	KStar	0.684862	0.375595
1	Bagging	0.790393	0.581773
1	NBTree	0.700146	0.400536
1	Decorate	0.794032	0.591053
1	RandomForest	0.767831	0.541547
1	JRip	0.767103	0.535408
1	RandomCommittee	0.714702	0.439159
1	FilteredClassifier	0.752547	0.505577
1	ClassificationViaRegression	0.749636	0.499959
1	Dagging	0.791121	0.583385
1	AttributeSelectedClassifier	0.740175	0.481048
1	REPTree	0.724163	0.450104
1	SMO	0.802766	0.60564
1	J48graft	0.756914	0.514535
1	Ridor	0.74818	0.507964
1	RandomSubSpace	0.796215	0.592997
1	EnsembleSelection	0.763464	0.543634
1	SimpleLogistic	0.796215	0.592682
1	DecisionTable	0.74163	0.487183
1	DataNearBalancedND	0.748908	0.498049
1	RacedIncrementalLogitBoost	0.722707	0.45568
1	SimpleCart	0.754003	0.508558
1	LogitBoost	0.767103	0.536256
1	ND	0.748908	0.498049
1	BayesNet	0.764192	0.531149
1	ClassBalancedND	0.748908	0.498049
1	OrdinalClassClassifier	0.748908	0.498049
1	END	0.748908	0.498049
2	AdaBoostM1	0.738719	0.492202
2	J48	0.702329	0.404693
2	IBk	0.73508	0.478273
2	MultiClassClassifier	0.787482	0.575083
2	PART	0.736536	0.49101
2	MultilayerPerceptron	0.805677	0.614461
2	KStar	0.655022	0.31814
2	Bagging	0.785298	0.571718
2	NBTree	0.708151	0.416579
2	Decorate	0.780204	0.562415
2	RandomForest	0.780204	0.563173
2	JRip	0.706696	0.414362
2	RandomCommittee	0.703785	0.413197
2	FilteredClassifier	0.74818	0.496464
2	ClassificationViaRegression	0.750364	0.502006
2	Dagging	0.779476	0.559123
2	AttributeSelectedClassifier	0.740175	0.482514
2	REPTree	0.742358	0.486702
2	SMO	0.795488	0.591006
2	J48graft	0.715429	0.430914
2	Ridor	0.735808	0.476388
2	RandomSubSpace	0.765648	0.533069
2	EnsembleSelection	0.734352	0.501098
2	SimpleLogistic	0.78821	0.576449
2	DecisionTable	0.730713	0.464915
2	DataNearBalancedND	0.702329	0.404693
2	RacedIncrementalLogitBoost	0.674672	0.360148
2	SimpleCart	0.742358	0.484749
2	LogitBoost	0.764192	0.531149
2	ND	0.702329	0.404693
2	BayesNet	0.74163	0.484301
2	ClassBalancedND	0.702329	0.404693
2	OrdinalClassClassifier	0.702329	0.404693
2	END	0.702329	0.404693
3	AdaBoostM1	0.742358	0.500661
3	J48	0.721252	0.442504
3	IBk	0.737991	0.486488
3	MultiClassClassifier	0.800582	0.601228
3	PART	0.727802	0.458569
3	MultilayerPerceptron	0.793304	0.587029
3	KStar	0.684862	0.376419
3	Bagging	0.780204	0.560467
3	NBTree	0.733624	0.467267
3	Decorate	0.799127	0.601033
3	RandomForest	0.773654	0.553319
3	JRip	0.763464	0.527538
3	RandomCommittee	0.711063	0.426397
3	FilteredClassifier	0.732897	0.465833
3	ClassificationViaRegression	0.763464	0.527175
3	Dagging	0.774381	0.549791
3	AttributeSelectedClassifier	0.730713	0.461428
3	REPTree	0.752547	0.505114
3	SMO	0.804949	0.609921
3	J48graft	0.745269	0.490591
3	Ridor	0.707424	0.429864
3	RandomSubSpace	0.769287	0.540571
3	EnsembleSelection	0.719796	0.469424
3	SimpleLogistic	0.79476	0.589542
3	DecisionTable	0.715429	0.437701
3	DataNearBalancedND	0.721252	0.442504
3	RacedIncrementalLogitBoost	0.69214	0.409883
3	SimpleCart	0.766376	0.533367
3	LogitBoost	0.736536	0.474432
3	ND	0.721252	0.442504
3	BayesNet	0.747453	0.496385
3	ClassBalancedND	0.721252	0.442504
3	OrdinalClassClassifier	0.721252	0.442504
3	END	0.721252	0.442504
4	AdaBoostM1	0.732897	0.471769
4	J48	0.740175	0.480411
4	IBk	0.754731	0.517552
4	MultiClassClassifier	0.792576	0.585332
4	PART	0.72198	0.454046
4	MultilayerPerceptron	0.775109	0.55511
4	KStar	0.680495	0.366156
4	Bagging	0.785298	0.571256
4	NBTree	0.715429	0.433178
4	Decorate	0.796943	0.596399
4	RandomForest	0.764192	0.537502
4	JRip	0.74163	0.483819
4	RandomCommittee	0.737263	0.48777
4	FilteredClassifier	0.732897	0.467293
4	ClassificationViaRegression	0.748908	0.498705
4	Dagging	0.786026	0.573962
4	AttributeSelectedClassifier	0.754003	0.510979
4	REPTree	0.757642	0.515879
4	SMO	0.793304	0.586618
4	J48graft	0.750364	0.500962
4	Ridor	0.708879	0.436672
4	RandomSubSpace	0.786754	0.574635
4	EnsembleSelection	0.729258	0.498639
4	SimpleLogistic	0.788937	0.577995
4	DecisionTable	0.732169	0.471102
4	DataNearBalancedND	0.740175	0.480411
4	RacedIncrementalLogitBoost	0.713246	0.448823
4	SimpleCart	0.743086	0.487975
4	LogitBoost	0.75182	0.505636
4	ND	0.740175	0.480411
4	BayesNet	0.737991	0.478061
4	ClassBalancedND	0.740175	0.480411
4	OrdinalClassClassifier	0.740175	0.480411
4	END	0.740175	0.480411
5	AdaBoostM1	0.751092	0.502183
5	J48	0.721252	0.442752
5	IBk	0.725619	0.459939
5	MultiClassClassifier	0.802766	0.605609
5	PART	0.724891	0.469286
5	MultilayerPerceptron	0.804221	0.608846
5	KStar	0.674672	0.357168
5	Bagging	0.792576	0.585605
5	NBTree	0.715429	0.432147
5	Decorate	0.765648	0.535914
5	RandomForest	0.767103	0.543425
5	JRip	0.759098	0.518354
5	RandomCommittee	0.70524	0.417449
5	FilteredClassifier	0.756914	0.514256
5	ClassificationViaRegression	0.740175	0.481125
5	Dagging	0.791849	0.584689
5	AttributeSelectedClassifier	0.73508	0.474624
5	REPTree	0.749636	0.501318
5	SMO	0.80131	0.602626
5	J48graft	0.737991	0.476712
5	Ridor	0.704512	0.423146
5	RandomSubSpace	0.790393	0.582209
5	EnsembleSelection	0.729258	0.502111
5	SimpleLogistic	0.805677	0.611354
5	DecisionTable	0.734352	0.479507
5	DataNearBalancedND	0.721252	0.442752
5	RacedIncrementalLogitBoost	0.706696	0.415617
5	SimpleCart	0.756186	0.514404
5	LogitBoost	0.766376	0.534002
5	ND	0.721252	0.442752
5	BayesNet	0.754731	0.512362
5	ClassBalancedND	0.721252	0.442752
5	OrdinalClassClassifier	0.721252	0.442752
5	END	0.721252	0.442752
6	AdaBoostM1	0.729985	0.463532
6	J48	0.721252	0.442504
6	IBk	0.752547	0.511944
6	MultiClassClassifier	0.802766	0.605609
6	PART	0.754731	0.520543
6	MultilayerPerceptron	0.80131	0.61219
6	KStar	0.683406	0.373245
6	Bagging	0.781659	0.563723
6	NBTree	0.736536	0.473272
6	Decorate	0.77802	0.557579
6	RandomForest	0.767103	0.541189
6	JRip	0.708151	0.419083
6	RandomCommittee	0.725619	0.45543
6	FilteredClassifier	0.72853	0.457876
6	ClassificationViaRegression	0.762009	0.524262
6	Dagging	0.80786	0.616162
6	AttributeSelectedClassifier	0.744541	0.49659
6	REPTree	0.772926	0.549223
6	SMO	0.799854	0.59976
6	J48graft	0.73508	0.470162
6	Ridor	0.729258	0.460646
6	RandomSubSpace	0.756914	0.514256
6	EnsembleSelection	0.749636	0.530433
6	SimpleLogistic	0.79476	0.58961
6	DecisionTable	0.717613	0.436679
6	DataNearBalancedND	0.721252	0.442504
6	RacedIncrementalLogitBoost	0.688501	0.377027
6	SimpleCart	0.742358	0.484883
6	LogitBoost	0.74818	0.497044
6	ND	0.721252	0.442504
6	BayesNet	0.749636	0.500395
6	ClassBalancedND	0.721252	0.442504
6	OrdinalClassClassifier	0.721252	0.442504
6	END	0.721252	0.442504
7	AdaBoostM1	0.743814	0.489498
7	J48	0.71179	0.423884
7	IBk	0.752547	0.511216
7	MultiClassClassifier	0.776565	0.553229
7	PART	0.734352	0.497136
7	MultilayerPerceptron	0.780932	0.575948
7	KStar	0.693595	0.390481
7	Bagging	0.789665	0.579601
7	NBTree	0.710335	0.420848
7	Decorate	0.780204	0.563511
7	RandomForest	0.780204	0.569765
7	JRip	0.74163	0.484395
7	RandomCommittee	0.737991	0.482674
7	FilteredClassifier	0.721252	0.442542
7	ClassificationViaRegression	0.754003	0.508705
7	Dagging	0.788937	0.579064
7	AttributeSelectedClassifier	0.737263	0.476409
7	REPTree	0.736536	0.474651
7	SMO	0.780204	0.560446
7	J48graft	0.729985	0.460569
7	Ridor	0.705968	0.421566
7	RandomSubSpace	0.780204	0.560493
7	EnsembleSelection	0.742358	0.526424
7	SimpleLogistic	0.772926	0.545861
7	DecisionTable	0.70524	0.413364
7	DataNearBalancedND	0.71179	0.423884
7	RacedIncrementalLogitBoost	0.692868	0.386391
7	SimpleCart	0.756914	0.515544
7	LogitBoost	0.767103	0.535114
7	ND	0.71179	0.423884
7	BayesNet	0.740175	0.481293
7	ClassBalancedND	0.71179	0.423884
7	OrdinalClassClassifier	0.71179	0.423884
7	END	0.71179	0.423884
8	AdaBoostM1	0.740175	0.482011
8	J48	0.735808	0.471728
8	IBk	0.756914	0.516674
8	MultiClassClassifier	0.779476	0.559085
8	PART	0.738719	0.492953
8	MultilayerPerceptron	0.783115	0.566845
8	KStar	0.684134	0.369096
8	Bagging	0.78821	0.576469
8	NBTree	0.678311	0.356661
8	Decorate	0.794032	0.588829
8	RandomForest	0.762009	0.527168
8	JRip	0.71179	0.426338
8	RandomCommittee	0.711063	0.428604
8	FilteredClassifier	0.745269	0.490572
8	ClassificationViaRegression	0.76492	0.530088
8	Dagging	0.787482	0.575003
8	AttributeSelectedClassifier	0.743814	0.492459
8	REPTree	0.75837	0.517233
8	SMO	0.778748	0.557688
8	J48graft	0.759098	0.518261
8	Ridor	0.711063	0.42734
8	RandomSubSpace	0.780204	0.560429
8	EnsembleSelection	0.756186	0.545884
8	SimpleLogistic	0.783115	0.566771
8	DecisionTable	0.70524	0.410481
8	DataNearBalancedND	0.735808	0.471728
8	RacedIncrementalLogitBoost	0.689229	0.388207
8	SimpleCart	0.760553	0.523454
8	LogitBoost	0.762737	0.526118
8	ND	0.735808	0.471728
8	BayesNet	0.729258	0.459013
8	ClassBalancedND	0.735808	0.471728
8	OrdinalClassClassifier	0.735808	0.471728
8	END	0.735808	0.471728
9	AdaBoostM1	0.74163	0.494719
9	J48	0.712518	0.425058
9	IBk	0.744541	0.493431
9	MultiClassClassifier	0.786754	0.573557
9	PART	0.715429	0.439958
9	MultilayerPerceptron	0.764192	0.561362
9	KStar	0.688501	0.380737
9	Bagging	0.780204	0.560524
9	NBTree	0.700873	0.40334
9	Decorate	0.781659	0.564699
9	RandomForest	0.769287	0.545744
9	JRip	0.740175	0.480354
9	RandomCommittee	0.711063	0.429058
9	FilteredClassifier	0.73508	0.470447
9	ClassificationViaRegression	0.75837	0.516959
9	Dagging	0.77802	0.556764
9	AttributeSelectedClassifier	0.73508	0.478811
9	REPTree	0.745269	0.491372
9	SMO	0.795488	0.590981
9	J48graft	0.724163	0.448349
9	Ridor	0.727074	0.495585
9	RandomSubSpace	0.788937	0.57867
9	EnsembleSelection	0.732169	0.493318
9	SimpleLogistic	0.78821	0.576596
9	DecisionTable	0.679039	0.361262
9	DataNearBalancedND	0.712518	0.425058
9	RacedIncrementalLogitBoost	0.672489	0.346581
9	SimpleCart	0.727802	0.458569
9	LogitBoost	0.763464	0.529453
9	ND	0.712518	0.425058
9	BayesNet	0.73508	0.471619
9	ClassBalancedND	0.712518	0.425058
9	OrdinalClassClassifier	0.712518	0.425058
9	END	0.712518	0.425058
10	AdaBoostM1	0.735808	0.4717
10	J48	0.72853	0.457083
10	IBk	0.76492	0.53455
10	MultiClassClassifier	0.776565	0.5532
10	PART	0.752547	0.507301
10	MultilayerPerceptron	0.732897	0.516559
10	KStar	0.689229	0.381822
10	Bagging	0.786026	0.57214
10	NBTree	0.74818	0.497577
10	Decorate	0.80131	0.602902
10	RandomForest	0.769287	0.541311
10	JRip	0.74163	0.483963
10	RandomCommittee	0.714702	0.433136
10	FilteredClassifier	0.74818	0.496717
10	ClassificationViaRegression	0.761281	0.522571
10	Dagging	0.775837	0.551758
10	AttributeSelectedClassifier	0.735808	0.472542
10	REPTree	0.74818	0.496835
10	SMO	0.776565	0.5532
10	J48graft	0.740175	0.480362
10	Ridor	0.745997	0.498788
10	RandomSubSpace	0.780932	0.561935
10	EnsembleSelection	0.740175	0.510613
10	SimpleLogistic	0.780204	0.56075
10	DecisionTable	0.726346	0.457971
10	DataNearBalancedND	0.72853	0.457083
10	RacedIncrementalLogitBoost	0.712518	0.425073
10	SimpleCart	0.745997	0.492145
10	LogitBoost	0.736536	0.474766
10	ND	0.72853	0.457083
10	BayesNet	0.749636	0.499274
10	ClassBalancedND	0.72853	0.457083
10	OrdinalClassClassifier	0.72853	0.457083
10	END	0.72853	0.457083
average	AdaBoostM1	0.737045	0.480817	0.0100324	0.019404
average	J48	0.724381	0.448867	0.014196	0.0284112
average	IBk	0.747671	0.501969	0.0117658	0.022123
average	MultiClassClassifier	0.790247	0.580621	0.0104392	0.0208934
average	PART	0.734571	0.48083	0.0126155	0.0254343
average	MultilayerPerceptron	0.781223	0.576587	0.0222061	0.0304148
average	KStar	0.681878	0.368886	0.0107264	0.0200413
average	Bagging	0.785953	0.572328	0.0043187	0.00876336
average	NBTree	0.714702	0.43014	0.0204015	0.0409117
average	Decorate	0.787118	0.576433	0.0115802	0.0225345
average	RandomForest	0.770087	0.546414	0.00616082	0.012517
average	JRip	0.738137	0.477361	0.0224659	0.0443219
average	RandomCommittee	0.717249	0.441287	0.0122663	0.025893
average	FilteredClassifier	0.740175	0.480758	0.0116094	0.0231665
average	ClassificationViaRegression	0.755313	0.511156	0.00800803	0.0157152
average	Dagging	0.786099	0.57297	0.00996407	0.0199866
average	AttributeSelectedClassifier	0.739665	0.48274	0.00658204	0.0140087
average	REPTree	0.748763	0.498843	0.0132425	0.0266249
average	SMO	0.792868	0.585789	0.0105591	0.0210922
average	J48graft	0.739447	0.479142	0.014008	0.0280818
average	Ridor	0.722416	0.457796	0.0169827	0.0343935
average	RandomSubSpace	0.779549	0.559926	0.0122433	0.0243679
average	EnsembleSelection	0.739665	0.512158	0.0135077	0.0241642
average	SimpleLogistic	0.789301	0.578761	0.00923318	0.0184127
average	DecisionTable	0.718777	0.442016	0.0185655	0.0386642
average	DataNearBalancedND	0.724381	0.448867	0.014196	0.0284112
average	RacedIncrementalLogitBoost	0.696507	0.401343	0.0167658	0.0361016
average	SimpleCart	0.749563	0.500365	0.0113191	0.02253
average	LogitBoost	0.756405	0.514397	0.0122798	0.0246795
average	ND	0.724381	0.448867	0.014196	0.0284112
average	BayesNet	0.744978	0.491385	0.0102307	0.0209703
average	ClassBalancedND	0.724381	0.448867	0.014196	0.0284112
average	OrdinalClassClassifier	0.724381	0.448867	0.014196	0.0284112
average	END	0.724381	0.448867	0.014196	0.0284112
